# Supplementary material for: Research on Fusing Multisatellite Soil Moisture Data Based on Bayesian Model Averaging
Source: Hindawi journal article supplement (doi:10.1155/2018/9310838), 2018-06-25
Supplement: f1 [file 9310838.f1.zip › 2012_sm00-10cm_daily_ZDB_ZHY_56785_366days_allin.txt]

56785     56785     yunnan         103.0197       25.2000          139       132     2012      01        01        001              0.000000   -9999.000000       0.000000   -9999.000000       0.277000       0.216900   -9999.000000   -9999.000000
56785     56785     yunnan         103.0197       25.2000          139       132     2012      01        02        002              0.000000       8.752045       0.286142       0.248271   -9999.000000   -9999.000000   -9999.000000   -9999.000000
56785     56785     yunnan         103.0197       25.2000          139       132     2012      01        03        003              0.000000      11.933716       0.404231       0.249488       0.312000   -9999.000000       0.115300       0.157000
56785     56785     yunnan         103.0197       25.2000          139       132     2012      01        04        004              0.000000      11.220215      18.900328       0.251144   -9999.000000       0.158700       0.131500   -9999.000000
56785     56785     yunnan         103.0197       25.2000          139       132     2012      01        05        005              0.000000       4.554901       0.150880       0.296655       0.351000   -9999.000000       0.117600       0.392000
56785     56785     yunnan         103.0197       25.2000          139       132     2012      01        06        006              0.000000       7.395325       0.000000       0.288284       0.324000       0.134800   -9999.000000       0.454000
56785     56785     yunnan         103.0197       25.2000          139       132     2012      01        07        007              0.000000       8.197968       0.000000       0.273982   -9999.000000       0.027700   -9999.000000   -9999.000000
56785     56785     yunnan         103.0197       25.2000          139       132     2012      01        08        008              0.000000       8.434509       0.097916       0.268721   -9999.000000   -9999.000000       0.106000       0.118000
56785     56785     yunnan         103.0197       25.2000          139       132     2012      01        09        009              0.000000       8.970947       0.000000       0.265059       0.261000       0.158000       0.106900   -9999.000000
56785     56785     yunnan         103.0197       25.2000          139       132     2012      01        10        010              0.000000      10.074188       0.000000       0.262254       0.302500   -9999.000000       0.116700       0.127000
56785     56785     yunnan         103.0197       25.2000          139       132     2012      01        11        011              0.000000       9.767578       0.000000       0.261385       0.270000       0.203900   -9999.000000       0.176000
56785     56785     yunnan         103.0197       25.2000          139       132     2012      01        12        012              0.000000      10.315369       0.757843       0.259974   -9999.000000       0.037400   -9999.000000       0.225000
56785     56785     yunnan         103.0197       25.2000          139       132     2012      01        13        013              0.000000       9.680603       3.071717       0.258803   -9999.000000   -9999.000000   -9999.000000       0.318000
56785     56785     yunnan         103.0197       25.2000          139       132     2012      01        14        014              0.000000       8.155396       0.119380       0.270282       0.244000       0.074300       0.113400   -9999.000000
56785     56785     yunnan         103.0197       25.2000          139       132     2012      01        15        015              0.000000       8.843781       0.000000       0.263728       0.238000   -9999.000000       0.114300       0.020000
56785     56785     yunnan         103.0197       25.2000          139       132     2012      01        16        016              0.000000       7.764984       1.099936       0.259232       0.245000       0.121900       0.124200       0.095000
56785     56785     yunnan         103.0197       25.2000          139       132     2012      01        17        017              0.000000       7.680939       0.000000       0.256480   -9999.000000       0.202600   -9999.000000       0.210000
56785     56785     yunnan         103.0197       25.2000          139       132     2012      01        18        018              0.000000       7.737457       0.000000       0.255493   -9999.000000   -9999.000000   -9999.000000       0.113000
56785     56785     yunnan         103.0197       25.2000          139       132     2012      01        19        019              0.000000       9.083466       0.000000       0.253020       0.239000       0.071100   -9999.000000   -9999.000000
56785     56785     yunnan         103.0197       25.2000          139       132     2012      01        20        020              0.000000       9.562225       0.000000       0.251366       0.243000   -9999.000000       0.127300       0.070000
56785     56785     yunnan         103.0197       25.2000          139       132     2012      01        21        021              0.000000       9.915863       0.247177       0.249784       0.285000   -9999.000000       0.126600   -9999.000000
56785     56785     yunnan         103.0197       25.2000          139       132     2012      01        22        022              0.000000       9.304199       0.000000       0.248633       0.304000       0.101600       0.121000       0.077000
56785     56785     yunnan         103.0197       25.2000          139       132     2012      01        23        023              0.000000       8.669342       0.000000       0.247702   -9999.000000   -9999.000000   -9999.000000       0.038000
56785     56785     yunnan         103.0197       25.2000          139       132     2012      01        24        024              0.000000       9.187378       0.000000       0.246706   -9999.000000       0.079100   -9999.000000   -9999.000000
56785     56785     yunnan         103.0197       25.2000          139       132     2012      01        25        025              0.000000       8.846130       0.000000       0.245055       0.272000       0.026100       0.137300       0.154000
56785     56785     yunnan         103.0197       25.2000          139       132     2012      01        26        026              0.000000       8.028870       0.000000       0.246454       0.284000   -9999.000000       0.139300   -9999.000000
56785     56785     yunnan         103.0197       25.2000          139       132     2012      01        27        027              0.000000      10.324524       0.000000       0.244627       0.280500       0.072500       0.132100       0.175000
56785     56785     yunnan         103.0197       25.2000          139       132     2012      01        28        028              0.000000      11.205353       0.000000       0.242349   -9999.000000   -9999.000000   -9999.000000       0.131000
56785     56785     yunnan         103.0197       25.2000          139       132     2012      01        29        029              0.000000      10.946289       0.000000       0.240569   -9999.000000       0.067100   -9999.000000       0.216000
56785     56785     yunnan         103.0197       25.2000          139       132     2012      01        30        030              0.000000      10.876831       0.000000       0.239930       0.239000       0.045800   -9999.000000       0.233000
56785     56785     yunnan         103.0197       25.2000          139       132     2012      01        31        031              0.000000      11.027313       0.000000       0.239028       0.271500   -9999.000000       0.134000   -9999.000000
56785     56785     yunnan         103.0197       25.2000          139       132     2012      02        01        032              0.000000      11.190002       0.000000       0.238685       0.239500       0.006300       0.135700       0.186000
56785     56785     yunnan         103.0197       25.2000          139       132     2012      02        02        033              0.000000      11.314758       0.000000       0.237104   -9999.000000   -9999.000000       0.127000   -9999.000000
56785     56785     yunnan         103.0197       25.2000          139       132     2012      02        03        034              0.000000      10.785095       0.000000       0.236188   -9999.000000       0.065000   -9999.000000       0.139000
56785     56785     yunnan         103.0197       25.2000          139       132     2012      02        04        035              0.000000      11.335907       0.000000       0.235776       0.208000       0.014000   -9999.000000       0.186000
56785     56785     yunnan         103.0197       25.2000          139       132     2012      02        05        036              0.000000      12.015656       0.000000       0.233867       0.231500   -9999.000000   -9999.000000   -9999.000000
56785     56785     yunnan         103.0197       25.2000          139       132     2012      02        06        037              0.000000      12.917999       0.000000       0.231211       0.229000   -9999.000000       0.121200       0.141000
56785     56785     yunnan         103.0197       25.2000          139       132     2012      02        07        038              0.000000      12.260468       0.000000       0.228887   -9999.000000   -9999.000000       0.126600   -9999.000000
56785     56785     yunnan         103.0197       25.2000          139       132     2012      02        08        039              0.000000      11.407257       0.000000       0.231065   -9999.000000   -9999.000000       0.116000       0.373000
56785     56785     yunnan         103.0197       25.2000          139       132     2012      02        09        040              0.000000      13.612518       0.000000       0.229225       0.223000       0.050500   -9999.000000       0.116000
56785     56785     yunnan         103.0197       25.2000          139       132     2012      02        10        041              0.000000      13.835358       0.000000       0.225387       0.232000   -9999.000000   -9999.000000   -9999.000000
56785     56785     yunnan         103.0197       25.2000          139       132     2012      02        11        042              0.000000      13.144409       0.000000       0.225074       0.256000       0.124500       0.117300       0.042000
56785     56785     yunnan         103.0197       25.2000          139       132     2012      02        12        043              0.000000      12.821167       0.000000       0.224935   -9999.000000   -9999.000000       0.121900   -9999.000000
56785     56785     yunnan         103.0197       25.2000          139       132     2012      02        13        044              0.000000      12.807465       0.000000       0.223956   -9999.000000   -9999.000000       0.127600       0.157000
56785     56785     yunnan         103.0197       25.2000          139       132     2012      02        14        045              0.000000      13.089294       4.083604       0.223395   -9999.000000       0.031700   -9999.000000       0.045000
56785     56785     yunnan         103.0197       25.2000          139       132     2012      02        15        046              0.000000      13.455292       0.000000       0.221676       0.222500   -9999.000000   -9999.000000       0.236000
56785     56785     yunnan         103.0197       25.2000          139       132     2012      02        16        047              0.000000      13.825958       0.000000       0.220107       0.243000       0.075000   -9999.000000       0.231000
56785     56785     yunnan         103.0197       25.2000          139       132     2012      02        17        048              0.000000      14.527557       0.000000       0.218960       0.263500       0.063400       0.131700   -9999.000000
56785     56785     yunnan         103.0197       25.2000          139       132     2012      02        18        049              0.000000      15.055145       0.000000       0.217289   -9999.000000   -9999.000000       0.138100       0.061000
56785     56785     yunnan         103.0197       25.2000          139       132     2012      02        19        050              0.000000      13.018890       0.672284       0.218336   -9999.000000       0.074300       0.129500   -9999.000000
56785     56785     yunnan         103.0197       25.2000          139       132     2012      02        20        051              0.000000      12.844574       0.368825       0.219116       0.218500   -9999.000000   -9999.000000       0.087000
56785     56785     yunnan         103.0197       25.2000          139       132     2012      02        21        052              0.000000      13.538116       0.000000       0.218066       0.237000       0.103300   -9999.000000       0.152000
56785     56785     yunnan         103.0197       25.2000          139       132     2012      02        22        053              0.000000      13.533295       0.000000       0.218013       0.231500       0.146900   -9999.000000   -9999.000000
56785     56785     yunnan         103.0197       25.2000          139       132     2012      02        23        054              0.000000      13.945740       0.000000       0.216825   -9999.000000   -9999.000000       0.123300       0.010000
56785     56785     yunnan         103.0197       25.2000          139       132     2012      02        24        055              0.000000      14.594757       0.000000       0.215354   -9999.000000       0.151800       0.124300   -9999.000000
56785     56785     yunnan         103.0197       25.2000          139       132     2012      02        25        056              0.000000      15.209320       0.000000       0.213459       0.208500   -9999.000000   -9999.000000       0.366000
56785     56785     yunnan         103.0197       25.2000          139       132     2012      02        26        057              0.000000      15.504913       0.000000       0.209263       0.215500   -9999.000000   -9999.000000       0.140000
56785     56785     yunnan         103.0197       25.2000          139       132     2012      02        27        058              0.000000      14.544830       0.853219       0.205506       0.228000       0.166400   -9999.000000       0.192000
56785     56785     yunnan         103.0197       25.2000          139       132     2012      02        28        059              0.000000      11.714233       0.000000       0.208308       0.246000   -9999.000000   -9999.000000       0.358000
56785     56785     yunnan         103.0197       25.2000          139       132     2012      02        29        060              0.000000   -9999.000000       3.547250   -9999.000000   -9999.000000       0.018300   -9999.000000   -9999.000000
56785     56785     yunnan         103.0197       25.2000          139       132     2012      03        01        061              0.000000      14.572357       6.579387       0.206559       0.244000       0.051000       0.118900       0.219000
56785     56785     yunnan         103.0197       25.2000          139       132     2012      03        02        062              0.000000       9.800049      17.425272       0.249524       0.233000   -9999.000000   -9999.000000   -9999.000000
56785     56785     yunnan         103.0197       25.2000          139       132     2012      03        03        063              0.000000       9.613251      56.367619       0.280819   -9999.000000       0.490800   -9999.000000       1.000000
56785     56785     yunnan         103.0197       25.2000          139       132     2012      03        04        064              0.000000       7.802338       0.241842       0.344173       0.303000   -9999.000000   -9999.000000       0.809000
56785     56785     yunnan         103.0197       25.2000          139       132     2012      03        05        065              0.000000       9.717407       0.000000       0.299419   -9999.000000       0.142300       0.124000   -9999.000000
56785     56785     yunnan         103.0197       25.2000          139       132     2012      03        06        066              0.000000      11.634613       0.000000       0.284488   -9999.000000       0.197200       0.124100       0.218000
56785     56785     yunnan         103.0197       25.2000          139       132     2012      03        07        067              0.000000      12.421875       0.000000       0.276419       0.211500   -9999.000000       0.116800   -9999.000000
56785     56785     yunnan         103.0197       25.2000          139       132     2012      03        08        068              0.000000      12.658264       0.062489       0.271126       0.229500       0.073700   -9999.000000       0.275000
56785     56785     yunnan         103.0197       25.2000          139       132     2012      03        09        069              0.000000      12.040741       0.000000       0.267745       0.224500   -9999.000000   -9999.000000       0.255000
56785     56785     yunnan         103.0197       25.2000          139       132     2012      03        10        070              0.000000      13.903534       0.000000       0.261730   -9999.000000       0.051300       0.113100       0.123000
56785     56785     yunnan         103.0197       25.2000          139       132     2012      03        11        071              0.000000      14.410187       0.000000       0.257073   -9999.000000       0.045900       0.114900       0.216000
56785     56785     yunnan         103.0197       25.2000          139       132     2012      03        12        072              0.000000      15.441193       0.000000       0.252174       0.178000   -9999.000000       0.114700   -9999.000000
56785     56785     yunnan         103.0197       25.2000          139       132     2012      03        13        073              0.000000      15.525970       0.000000       0.247873       0.203500       0.239800   -9999.000000       0.126000
56785     56785     yunnan         103.0197       25.2000          139       132     2012      03        14        074              0.000000      16.305176       0.000000       0.244189       0.206500   -9999.000000   -9999.000000       0.158000
56785     56785     yunnan         103.0197       25.2000          139       132     2012      03        15        075              0.000000      16.101440       0.000000       0.240648   -9999.000000       0.090900   -9999.000000       0.108000
56785     56785     yunnan         103.0197       25.2000          139       132     2012      03        16        076              0.000000      16.435608       0.980699       0.236898   -9999.000000       0.232700       0.107500       0.054000
56785     56785     yunnan         103.0197       25.2000          139       132     2012      03        17        077              0.000000      16.125763       0.000000       0.233884       0.192000   -9999.000000       0.107400   -9999.000000
56785     56785     yunnan         103.0197       25.2000          139       132     2012      03        18        078              0.000000      14.852020       0.000000       0.231667       0.189500       0.091700       0.104700       0.035000
56785     56785     yunnan         103.0197       25.2000          139       132     2012      03        19        079              0.000000      15.689209       0.000000       0.229258       0.202000   -9999.000000   -9999.000000   -9999.000000
56785     56785     yunnan         103.0197       25.2000          139       132     2012      03        20        080              0.000000      16.066467       0.000000       0.225973       0.219000   -9999.000000   -9999.000000       0.031000
56785     56785     yunnan         103.0197       25.2000          139       132     2012      03        21        081              0.000000      17.399506       0.000000       0.222683   -9999.000000       0.107300   -9999.000000       0.066000
56785     56785     yunnan         103.0197       25.2000          139       132     2012      03        22        082              0.000000      18.086029       0.000000       0.219467   -9999.000000   -9999.000000       0.110900   -9999.000000
56785     56785     yunnan         103.0197       25.2000          139       132     2012      03        23        083              0.000000      17.622742       0.000000       0.218320       0.173500       0.065100       0.113700       0.153000
56785     56785     yunnan         103.0197       25.2000          139       132     2012      03        24        084              0.000000      12.044250       0.000000       0.220602       0.178500       0.031500       0.104300   -9999.000000
56785     56785     yunnan         103.0197       25.2000          139       132     2012      03        25        085              0.000000      14.192444       1.767601       0.221425       0.190500   -9999.000000   -9999.000000       0.279000
56785     56785     yunnan         103.0197       25.2000          139       132     2012      03        26        086              0.000000      16.561127       0.000000       0.227567   -9999.000000       0.073100   -9999.000000       0.129000
56785     56785     yunnan         103.0197       25.2000          139       132     2012      03        27        087              0.000000      16.995178      12.783844       0.229486   -9999.000000   -9999.000000       0.119100       0.431000
56785     56785     yunnan         103.0197       25.2000          139       132     2012      03        28        088              0.000000      16.959290       0.000000       0.260411       0.153500       0.236600       0.108100       0.689000
56785     56785     yunnan         103.0197       25.2000          139       132     2012      03        29        089              0.000000      17.879181       0.000000       0.259178       0.167000       0.128100       0.105400   -9999.000000
56785     56785     yunnan         103.0197       25.2000          139       132     2012      03        30        090              0.000000      18.544586       1.448514       0.243201       0.178000   -9999.000000   -9999.000000       0.098000
56785     56785     yunnan         103.0197       25.2000          139       132     2012      03        31        091              0.000000      16.897644       0.000000       0.234972   -9999.000000       0.078700   -9999.000000   -9999.000000
56785     56785     yunnan         103.0197       25.2000          139       132     2012      04        01        092              0.000000      13.266632       0.000000       0.235416   -9999.000000   -9999.000000   -9999.000000       0.219000
56785     56785     yunnan         103.0197       25.2000          139       132     2012      04        02        093              0.000000      16.775360       0.000000       0.231539       0.159500       0.021000       0.101600       0.213000
56785     56785     yunnan         103.0197       25.2000          139       132     2012      04        03        094              0.000000      18.775787       0.000000       0.226108       0.176500       0.072300       0.099400   -9999.000000
56785     56785     yunnan         103.0197       25.2000          139       132     2012      04        04        095              0.000000      17.777161       0.000000       0.224584       0.181000   -9999.000000       0.094100       0.167000
56785     56785     yunnan         103.0197       25.2000          139       132     2012      04        05        096              0.000000      18.496979       0.000000       0.218961   -9999.000000       0.070000   -9999.000000   -9999.000000
56785     56785     yunnan         103.0197       25.2000          139       132     2012      04        06        097              0.000000      18.611359       1.649494       0.215738   -9999.000000   -9999.000000   -9999.000000       0.444000
56785     56785     yunnan         103.0197       25.2000          139       132     2012      04        07        098              0.000000      17.873108      13.665005       0.224553       0.241000   -9999.000000   -9999.000000       0.346000
56785     56785     yunnan         103.0197       25.2000          139       132     2012      04        08        099              0.000000      14.919189      18.635479       0.273793       0.258000       0.183100       0.129300       0.823000
56785     56785     yunnan         103.0197       25.2000          139       132     2012      04        09        100              0.000000      12.352264       0.000000       0.304899       0.208500   -9999.000000       0.109900       0.250000
56785     56785     yunnan         103.0197       25.2000          139       132     2012      04        10        101              0.000000      15.603607       0.000000       0.276809       0.188000       0.123200       0.095700   -9999.000000
56785     56785     yunnan         103.0197       25.2000          139       132     2012      04        11        102              0.000000      16.470917       0.000000       0.265377   -9999.000000       0.025500   -9999.000000       0.237000
56785     56785     yunnan         103.0197       25.2000          139       132     2012      04        12        103              0.000000      17.722076       0.000000       0.257015   -9999.000000   -9999.000000   -9999.000000       0.175000
56785     56785     yunnan         103.0197       25.2000          139       132     2012      04        13        104              0.000000      17.031738       0.000000       0.252176       0.154500       0.119900       0.097700       0.199000
56785     56785     yunnan         103.0197       25.2000          139       132     2012      04        14        105              0.000000      17.824615       0.000000       0.247407       0.160500   -9999.000000       0.098900       0.211000
56785     56785     yunnan         103.0197       25.2000          139       132     2012      04        15        106              0.000000      19.270416       0.000000       0.238982       0.169500       0.090900       0.098000   -9999.000000
56785     56785     yunnan         103.0197       25.2000          139       132     2012      04        16        107              0.000000      19.468231       0.000000       0.233181   -9999.000000       0.075900   -9999.000000       0.082000
56785     56785     yunnan         103.0197       25.2000          139       132     2012      04        17        108              0.000000      19.604858       0.000000       0.229158   -9999.000000   -9999.000000   -9999.000000   -9999.000000
56785     56785     yunnan         103.0197       25.2000          139       132     2012      04        18        109              0.000000      19.637512       0.000000       0.223673       0.144500       0.068900   -9999.000000       0.284000
56785     56785     yunnan         103.0197       25.2000          139       132     2012      04        19        110              0.000000      19.798248       3.389144       0.218908       0.162000   -9999.000000       0.117300       0.228000
56785     56785     yunnan         103.0197       25.2000          139       132     2012      04        20        111              0.000000      17.894684       1.926084       0.238441       0.177500       0.024500       0.117800   -9999.000000
56785     56785     yunnan         103.0197       25.2000          139       132     2012      04        21        112              0.000000      18.271271       0.478914       0.243670   -9999.000000       0.041600       0.106200       0.007000
56785     56785     yunnan         103.0197       25.2000          139       132     2012      04        22        113              0.000000      18.283752       1.759668       0.237419   -9999.000000   -9999.000000   -9999.000000   -9999.000000
56785     56785     yunnan         103.0197       25.2000          139       132     2012      04        23        114              0.000000      18.258667       0.000000       0.241708       0.120500       0.124800   -9999.000000       0.281000
56785     56785     yunnan         103.0197       25.2000          139       132     2012      04        24        115              0.000000      19.867279       0.000000       0.229292       0.132500       0.059300   -9999.000000       0.252000
56785     56785     yunnan         103.0197       25.2000          139       132     2012      04        25        116              0.000000      20.597321       0.000000       0.218426       0.141500   -9999.000000       0.098300       0.302000
56785     56785     yunnan         103.0197       25.2000          139       132     2012      04        26        117              0.000000      18.761230       1.403906       0.218015   -9999.000000       0.149200       0.107600       0.356000
56785     56785     yunnan         103.0197       25.2000          139       132     2012      04        27        118              0.000000      18.087524       0.000000       0.226944   -9999.000000   -9999.000000       0.088000   -9999.000000
56785     56785     yunnan         103.0197       25.2000          139       132     2012      04        28        119              0.000000      19.891296       0.000000       0.218586       0.126000       0.122600   -9999.000000       0.231000
56785     56785     yunnan         103.0197       25.2000          139       132     2012      04        29        120              0.000000      19.564301       0.000000       0.212664       0.132500       0.134300   -9999.000000   -9999.000000
56785     56785     yunnan         103.0197       25.2000          139       132     2012      04        30        121              0.000000      19.979675       0.000000       0.208455       0.138500   -9999.000000       0.100600       0.265000
56785     56785     yunnan         103.0197       25.2000          139       132     2012      05        01        122              0.000000      20.790588       0.000000       0.202057       0.159000       0.044000       0.103700       0.348000
56785     56785     yunnan         103.0197       25.2000          139       132     2012      05        02        123              0.000000      21.200531       0.000000       0.196391   -9999.000000   -9999.000000       0.102600   -9999.000000
56785     56785     yunnan         103.0197       25.2000          139       132     2012      05        03        124              0.000000      21.669220       0.000000       0.191159   -9999.000000       0.116100   -9999.000000       0.246000
56785     56785     yunnan         103.0197       25.2000          139       132     2012      05        04        125              0.000000      21.621399       0.000000       0.185754       0.128500       0.240500   -9999.000000   -9999.000000
56785     56785     yunnan         103.0197       25.2000          139       132     2012      05        05        126              0.000000      22.285645       0.000000       0.182003       0.144500   -9999.000000   -9999.000000       0.308000
56785     56785     yunnan         103.0197       25.2000          139       132     2012      05        06        127              0.000000      22.542877       1.129012       0.182045       0.169500       0.093700       0.111100       0.206000
56785     56785     yunnan         103.0197       25.2000          139       132     2012      05        07        128              0.000000      20.267029       2.184845       0.189294   -9999.000000   -9999.000000       0.101800       0.622000
56785     56785     yunnan         103.0197       25.2000          139       132     2012      05        08        129              0.000000      19.114288       5.304019       0.213584   -9999.000000       0.157400       0.106200       0.565000
56785     56785     yunnan         103.0197       25.2000          139       132     2012      05        09        130              0.000000      18.865326       0.000000       0.247405       0.115000       0.059700   -9999.000000   -9999.000000
56785     56785     yunnan         103.0197       25.2000          139       132     2012      05        10        131              0.000000      21.386963       1.273311       0.228766       0.148000   -9999.000000   -9999.000000       0.071000
56785     56785     yunnan         103.0197       25.2000          139       132     2012      05        11        132              0.000000      22.017822       0.000000       0.219524       0.165500       0.160500   -9999.000000       0.235000
56785     56785     yunnan         103.0197       25.2000          139       132     2012      05        12        133              0.000000      22.710785       1.577855       0.211048   -9999.000000   -9999.000000       0.098100       0.265000
56785     56785     yunnan         103.0197       25.2000          139       132     2012      05        13        134              0.000000      22.615845       0.000000       0.205769   -9999.000000   -9999.000000       0.094300       0.249000
56785     56785     yunnan         103.0197       25.2000          139       132     2012      05        14        135              0.000000      22.353119       0.957139       0.200715       0.192000       0.268200       0.108700   -9999.000000
56785     56785     yunnan         103.0197       25.2000          139       132     2012      05        15        136              0.000000      21.213531       0.176378       0.203458       0.175000   -9999.000000   -9999.000000       0.109000
56785     56785     yunnan         103.0197       25.2000          139       132     2012      05        16        137              0.000000      20.597290       0.000000       0.204198       0.174500       0.072000   -9999.000000   -9999.000000
56785     56785     yunnan         103.0197       25.2000          139       132     2012      05        17        138              0.000000      22.496124       0.834281       0.197594       0.181000       0.099400       0.098300       0.205000
56785     56785     yunnan         103.0197       25.2000          139       132     2012      05        18        139              0.000000      22.063171       0.251157       0.202801   -9999.000000   -9999.000000       0.103000       0.307000
56785     56785     yunnan         103.0197       25.2000          139       132     2012      05        19        140              0.000000      23.139709       0.000000       0.194806       0.164000       0.047600       0.095000   -9999.000000
56785     56785     yunnan         103.0197       25.2000          139       132     2012      05        20        141              0.000000      23.305939       0.000000       0.189400       0.148000   -9999.000000   -9999.000000       0.006000
56785     56785     yunnan         103.0197       25.2000          139       132     2012      05        21        142              0.000000      24.070984       0.000000       0.184078       0.131000       0.118400   -9999.000000   -9999.000000
56785     56785     yunnan         103.0197       25.2000          139       132     2012      05        22        143              0.000000      24.776428       4.330333       0.178347       0.145000       0.055900   -9999.000000       0.312000
56785     56785     yunnan         103.0197       25.2000          139       132     2012      05        23        144              0.000000      23.771332       0.000000       0.194503   -9999.000000   -9999.000000       0.089700       0.379000
56785     56785     yunnan         103.0197       25.2000          139       132     2012      05        24        145              0.000000      23.786346       3.529505       0.203364   -9999.000000       0.188600       0.105300       0.494000
56785     56785     yunnan         103.0197       25.2000          139       132     2012      05        25        146              0.000000      22.955017       1.335492       0.215174       0.173500   -9999.000000       0.098700       0.690000
56785     56785     yunnan         103.0197       25.2000          139       132     2012      05        26        147              0.000000      18.932129       0.000000       0.220569       0.157000       0.104000   -9999.000000   -9999.000000
56785     56785     yunnan         103.0197       25.2000          139       132     2012      05        27        148              0.000000      20.423767       6.285171       0.216322       0.156500       0.148800   -9999.000000       0.611000
56785     56785     yunnan         103.0197       25.2000          139       132     2012      05        28        149              0.000000      21.197144       8.828396       0.232839   -9999.000000   -9999.000000   -9999.000000   -9999.000000
56785     56785     yunnan         103.0197       25.2000          139       132     2012      05        29        150              0.000000      20.980713      10.250456       0.273298   -9999.000000       0.367900       0.115300   -9999.000000
56785     56785     yunnan         103.0197       25.2000          139       132     2012      05        30        151              0.000000      18.544006       0.121860       0.283624       0.176000   -9999.000000       0.111000   -9999.000000
56785     56785     yunnan         103.0197       25.2000          139       132     2012      05        31        152              0.000000      18.534027       0.414230       0.261312       0.191000   -9999.000000   -9999.000000   -9999.000000
56785     56785     yunnan         103.0197       25.2000          139       132     2012      06        01        153              0.000000      18.550537      41.059456       0.255990   -9999.000000       0.236800   -9999.000000       1.000000
56785     56785     yunnan         103.0197       25.2000          139       132     2012      06        02        154              0.000000      18.616272       1.632617       0.305987   -9999.000000   -9999.000000   -9999.000000   -9999.000000
56785     56785     yunnan         103.0197       25.2000          139       132     2012      06        03        155              0.000000      17.642914       2.966381       0.301666   -9999.000000       0.329000   -9999.000000       0.884000
56785     56785     yunnan         103.0197       25.2000          139       132     2012      06        04        156              0.000000      19.489288       9.973233       0.294119       0.199000       0.140200       0.153900       0.942000
56785     56785     yunnan         103.0197       25.2000          139       132     2012      06        05        157              0.000000      20.388092       0.000000       0.302821       0.174500   -9999.000000       0.119100       0.666000
56785     56785     yunnan         103.0197       25.2000          139       132     2012      06        06        158              0.000000      22.110016       0.000000       0.278291       0.161000       0.186200   -9999.000000       0.482000
56785     56785     yunnan         103.0197       25.2000          139       132     2012      06        07        159              0.000000      22.950500       9.677962       0.267748       0.158000   -9999.000000   -9999.000000   -9999.000000
56785     56785     yunnan         103.0197       25.2000          139       132     2012      06        08        160              0.000000      23.029755       7.671967       0.279405   -9999.000000       0.379700   -9999.000000       0.825000
56785     56785     yunnan         103.0197       25.2000          139       132     2012      06        09        161              0.000000      21.100861       0.151145       0.297070   -9999.000000       0.214700       0.126900       0.835000
56785     56785     yunnan         103.0197       25.2000          139       132     2012      06        10        162              0.000000      22.268219       1.044589       0.277506       0.201000   -9999.000000       0.130100       0.717000
56785     56785     yunnan         103.0197       25.2000          139       132     2012      06        11        163              0.000000      21.170654       8.063504       0.272172       0.183500       0.375800       0.064700       0.599000
56785     56785     yunnan         103.0197       25.2000          139       132     2012      06        12        164              0.000000      20.419647       1.055698       0.287457       0.183500   -9999.000000   -9999.000000   -9999.000000
56785     56785     yunnan         103.0197       25.2000          139       132     2012      06        13        165              0.000000      19.957397       4.047139       0.279282   -9999.000000       0.203800   -9999.000000       0.386000
56785     56785     yunnan         103.0197       25.2000          139       132     2012      06        14        166              0.000000      21.558624       3.170349       0.267222   -9999.000000       0.225300       0.064600   -9999.000000
56785     56785     yunnan         103.0197       25.2000          139       132     2012      06        15        167              0.000000      19.298218       0.000000       0.275001       0.142500   -9999.000000       0.063100       0.575000
56785     56785     yunnan         103.0197       25.2000          139       132     2012      06        16        168              0.000000      19.476379       0.217783       0.264201       0.171000       0.304700       0.066300       0.604000
56785     56785     yunnan         103.0197       25.2000          139       132     2012      06        17        169              0.000000      17.806885       0.367756       0.262664       0.159500   -9999.000000   -9999.000000   -9999.000000
56785     56785     yunnan         103.0197       25.2000          139       132     2012      06        18        170              0.000000      19.597443       1.430436       0.259261   -9999.000000   -9999.000000   -9999.000000       0.426000
56785     56785     yunnan         103.0197       25.2000          139       132     2012      06        19        171              0.000000      21.264954      21.840015       0.260396   -9999.000000       0.391600   -9999.000000   -9999.000000
56785     56785     yunnan         103.0197       25.2000          139       132     2012      06        20        172              0.000000      18.950958       7.728356       0.309373       0.171500   -9999.000000       0.081800       1.000000
56785     56785     yunnan         103.0197       25.2000          139       132     2012      06        21        173              0.000000      19.662964       6.322829       0.295403       0.207000       0.274400       0.078200       0.990000
56785     56785     yunnan         103.0197       25.2000          139       132     2012      06        22        174              0.000000      21.047760      65.379845       0.295928   -9999.000000       0.346100       0.082100       1.000000
56785     56785     yunnan         103.0197       25.2000          139       132     2012      06        23        175              0.000000      19.775421      14.178531       0.341953   -9999.000000   -9999.000000   -9999.000000       1.000000
56785     56785     yunnan         103.0197       25.2000          139       132     2012      06        24        176              0.000000      20.100281       1.558921       0.326790   -9999.000000       0.475300   -9999.000000   -9999.000000
56785     56785     yunnan         103.0197       25.2000          139       132     2012      06        25        177              0.000000      19.825562       0.125802       0.304448   -9999.000000   -9999.000000   -9999.000000       0.583000
56785     56785     yunnan         103.0197       25.2000          139       132     2012      06        26        178              0.000000      19.711639       2.763466       0.289224       0.201000       0.379600       0.092200   -9999.000000
56785     56785     yunnan         103.0197       25.2000          139       132     2012      06        27        179              0.000000      20.036835       4.377693       0.287729       0.191000       0.366900       0.092100       0.778000
56785     56785     yunnan         103.0197       25.2000          139       132     2012      06        28        180              0.000000      20.542603       0.106149       0.280531       0.194000   -9999.000000       0.086800       0.749000
56785     56785     yunnan         103.0197       25.2000          139       132     2012      06        29        181              0.000000      20.766327       2.119142       0.274999   -9999.000000       0.206800   -9999.000000   -9999.000000
56785     56785     yunnan         103.0197       25.2000          139       132     2012      06        30        182              0.000000      22.176544       0.820546       0.270007   -9999.000000   -9999.000000   -9999.000000   -9999.000000
56785     56785     yunnan         103.0197       25.2000          139       132     2012      07        01        183              0.000000      22.130829       0.503382       0.268306       0.111000       0.281900       0.084400   -9999.000000
56785     56785     yunnan         103.0197       25.2000          139       132     2012      07        02        184              0.000000      22.286407       2.087008       0.267017       0.117500       0.182700       0.065800       0.662000
56785     56785     yunnan         103.0197       25.2000          139       132     2012      07        03        185              0.000000      21.581970       0.612054       0.272080       0.127000   -9999.000000       0.068900       0.691000
56785     56785     yunnan         103.0197       25.2000          139       132     2012      07        04        186              0.000000      21.195862       8.239676       0.267060   -9999.000000       0.341500   -9999.000000       0.913000
56785     56785     yunnan         103.0197       25.2000          139       132     2012      07        05        187              0.000000      20.080475       7.236219       0.286913   -9999.000000   -9999.000000   -9999.000000       0.877000
56785     56785     yunnan         103.0197       25.2000          139       132     2012      07        06        188              0.000000      20.265778       0.000000       0.295346   -9999.000000       0.348900   -9999.000000   -9999.000000
56785     56785     yunnan         103.0197       25.2000          139       132     2012      07        07        189              0.000000      21.506165       3.867036       0.278344   -9999.000000       0.261700       0.065300       0.770000
56785     56785     yunnan         103.0197       25.2000          139       132     2012      07        08        190              0.000000      21.956482       0.348061       0.280319       0.123000   -9999.000000       0.064700       0.798000
56785     56785     yunnan         103.0197       25.2000          139       132     2012      07        09        191              0.000000      22.022003       0.000000       0.273786   -9999.000000       0.253200       0.053000       0.639000
56785     56785     yunnan         103.0197       25.2000          139       132     2012      07        10        192              0.000000      22.150482       0.193091       0.267955   -9999.000000       0.298900   -9999.000000       0.726000
56785     56785     yunnan         103.0197       25.2000          139       132     2012      07        11        193              0.000000      22.674042       0.000000       0.263721       0.180000   -9999.000000   -9999.000000   -9999.000000
56785     56785     yunnan         103.0197       25.2000          139       132     2012      07        12        194              0.000000      22.591675       0.275419       0.260149       0.178500       0.225100   -9999.000000       0.368000
56785     56785     yunnan         103.0197       25.2000          139       132     2012      07        13        195              0.000000      22.104370      17.943298       0.258610       0.246000   -9999.000000       0.065500   -9999.000000
56785     56785     yunnan         103.0197       25.2000          139       132     2012      07        14        196              0.000000      20.441925       6.270178       0.299640       0.242000       0.281400       0.063200       1.000000
56785     56785     yunnan         103.0197       25.2000          139       132     2012      07        15        197              0.000000      20.836334       0.158073       0.297075   -9999.000000       0.253700       0.061000       0.901000
56785     56785     yunnan         103.0197       25.2000          139       132     2012      07        16        198              0.000000      20.486237       3.791617       0.285328   -9999.000000   -9999.000000   -9999.000000   -9999.000000
56785     56785     yunnan         103.0197       25.2000          139       132     2012      07        17        199              0.000000      19.830017       7.407047       0.288143       0.209500       0.271700   -9999.000000       0.783000
56785     56785     yunnan         103.0197       25.2000          139       132     2012      07        18        200              0.000000      20.110474       9.640828       0.296009       0.230000   -9999.000000       0.049500   -9999.000000
56785     56785     yunnan         103.0197       25.2000          139       132     2012      07        19        201              0.000000      19.941254      12.455861       0.300767       0.244000       0.246800       0.051100       1.000000
56785     56785     yunnan         103.0197       25.2000          139       132     2012      07        20        202              0.000000      20.251343       0.238453       0.310969   -9999.000000       0.189800       0.049800       0.916000
56785     56785     yunnan         103.0197       25.2000          139       132     2012      07        21        203              0.000000      21.004120       0.000000       0.291662   -9999.000000   -9999.000000   -9999.000000       0.806000
56785     56785     yunnan         103.0197       25.2000          139       132     2012      07        22        204              0.000000      21.395264      19.614307       0.282211       0.241000       0.280300   -9999.000000       0.887000
56785     56785     yunnan         103.0197       25.2000          139       132     2012      07        23        205              0.000000      19.977509      19.493322       0.307486       0.240500   -9999.000000   -9999.000000   -9999.000000
56785     56785     yunnan         103.0197       25.2000          139       132     2012      07        24        206              0.000000      20.501221       0.140053       0.317382       0.224000       0.236300       0.054600       0.629000
56785     56785     yunnan         103.0197       25.2000          139       132     2012      07        25        207              0.000000      20.740814       1.221261       0.298934       0.252000       0.399200       0.053500   -9999.000000
56785     56785     yunnan         103.0197       25.2000          139       132     2012      07        26        208              0.000000      19.508148       3.709377       0.291194   -9999.000000   -9999.000000       0.053700       0.859000
56785     56785     yunnan         103.0197       25.2000          139       132     2012      07        27        209              0.000000      20.819824       8.626824       0.292370   -9999.000000       0.293200   -9999.000000       0.808000
56785     56785     yunnan         103.0197       25.2000          139       132     2012      07        28        210              0.000000      20.819244      12.697469       0.294936       0.252000   -9999.000000   -9999.000000   -9999.000000
56785     56785     yunnan         103.0197       25.2000          139       132     2012      07        29        211              0.000000      18.961731       1.695511       0.315450       0.234500   -9999.000000   -9999.000000       0.811000
56785     56785     yunnan         103.0197       25.2000          139       132     2012      07        30        212              0.000000      20.531372       2.045332       0.297995       0.216000       0.187900       0.075600   -9999.000000
56785     56785     yunnan         103.0197       25.2000          139       132     2012      07        31        213              0.000000      21.972015      16.073889       0.292857   -9999.000000   -9999.000000       0.076000       1.000000
56785     56785     yunnan         103.0197       25.2000          139       132     2012      08        01        214              0.000000      21.106110       7.727352       0.308462   -9999.000000       0.317200   -9999.000000       0.876000
56785     56785     yunnan         103.0197       25.2000          139       132     2012      08        02        215              0.000000      20.189514       0.714395       0.309044       0.320000       0.253800   -9999.000000       0.858000
56785     56785     yunnan         103.0197       25.2000          139       132     2012      08        03        216              0.000000      20.824554      38.087204       0.299453       0.286000   -9999.000000   -9999.000000       0.819000
56785     56785     yunnan         103.0197       25.2000          139       132     2012      08        04        217              0.000000      21.419098       0.464913       0.320423       0.326000       0.267300       0.073500   -9999.000000
56785     56785     yunnan         103.0197       25.2000          139       132     2012      08        05        218              0.000000      22.293793      19.212933       0.313930   -9999.000000   -9999.000000       0.080000       1.000000
56785     56785     yunnan         103.0197       25.2000          139       132     2012      08        06        219              0.000000      22.419281      27.695898       0.321567   -9999.000000       0.263400       0.111700       0.865000
56785     56785     yunnan         103.0197       25.2000          139       132     2012      08        07        220              0.000000      20.711700       1.671286       0.335773       0.321000       0.241000   -9999.000000       0.894000
56785     56785     yunnan         103.0197       25.2000          139       132     2012      08        08        221              0.000000      19.945740       0.082308       0.321595       0.321000   -9999.000000   -9999.000000       0.817000
56785     56785     yunnan         103.0197       25.2000          139       132     2012      08        09        222              0.000000      21.330231       1.492386       0.309218       0.315500       0.183400   -9999.000000   -9999.000000
56785     56785     yunnan         103.0197       25.2000          139       132     2012      08        10        223              0.000000      21.535309       0.000000       0.305480       0.299000   -9999.000000       0.109000       0.477000
56785     56785     yunnan         103.0197       25.2000          139       132     2012      08        11        224              0.000000      21.618500       0.000000       0.298841   -9999.000000   -9999.000000       0.106500   -9999.000000
56785     56785     yunnan         103.0197       25.2000          139       132     2012      08        12        225              0.000000      22.692169       4.360474       0.293212   -9999.000000       0.135100       0.099100       0.716000
56785     56785     yunnan         103.0197       25.2000          139       132     2012      08        13        226              0.000000      23.452637      12.218537       0.295368       0.244000   -9999.000000   -9999.000000       0.712000
56785     56785     yunnan         103.0197       25.2000          139       132     2012      08        14        227              0.000000      21.738525       0.757713       0.311887       0.239000       0.317700   -9999.000000   -9999.000000
56785     56785     yunnan         103.0197       25.2000          139       132     2012      08        15        228              0.000000      22.065948       4.194427       0.298000       0.290000       0.194400       0.117800       0.576000
56785     56785     yunnan         103.0197       25.2000          139       132     2012      08        16        229              0.000000      21.591766       0.000000       0.299570   -9999.000000   -9999.000000       0.119800   -9999.000000
56785     56785     yunnan         103.0197       25.2000          139       132     2012      08        17        230              0.000000      22.495697       1.788946       0.293647   -9999.000000       0.182900       0.114700       0.731000
56785     56785     yunnan         103.0197       25.2000          139       132     2012      08        18        231              0.000000      22.778778      15.678158       0.288052       0.319000   -9999.000000   -9999.000000       0.790000
56785     56785     yunnan         103.0197       25.2000          139       132     2012      08        19        232              0.000000      19.438385       3.305051       0.309181       0.250000       0.337500   -9999.000000       0.725000
56785     56785     yunnan         103.0197       25.2000          139       132     2012      08        20        233              0.000000      20.221222       7.558890       0.306028       0.235000       0.295200   -9999.000000       0.853000
56785     56785     yunnan         103.0197       25.2000          139       132     2012      08        21        234              0.000000      21.307007       0.000000       0.302757       0.252000   -9999.000000       0.078400   -9999.000000
56785     56785     yunnan         103.0197       25.2000          139       132     2012      08        22        235              0.000000      20.887939       2.225860       0.296656   -9999.000000       0.265500       0.080100   -9999.000000
56785     56785     yunnan         103.0197       25.2000          139       132     2012      08        23        236              0.000000      19.584595       5.535951       0.294391   -9999.000000   -9999.000000       0.078500   -9999.000000
56785     56785     yunnan         103.0197       25.2000          139       132     2012      08        24        237              0.000000      19.580200       0.687028       0.297596       0.206000       0.212400   -9999.000000   -9999.000000
56785     56785     yunnan         103.0197       25.2000          139       132     2012      08        25        238              0.000000      19.085999       1.934342       0.296926       0.237000   -9999.000000   -9999.000000   -9999.000000
56785     56785     yunnan         103.0197       25.2000          139       132     2012      08        26        239              0.000000      20.567230       4.945510       0.291418       0.252000   -9999.000000   -9999.000000   -9999.000000
56785     56785     yunnan         103.0197       25.2000          139       132     2012      08        27        240              0.000000      19.685730       0.866241       0.299484   -9999.000000       0.168600       0.085000       0.656000
56785     56785     yunnan         103.0197       25.2000          139       132     2012      08        28        241              0.000000      20.526001       0.280474       0.293162   -9999.000000   -9999.000000       0.083500   -9999.000000
56785     56785     yunnan         103.0197       25.2000          139       132     2012      08        29        242              0.000000      21.073181       0.278538       0.289434       0.207500       0.152100       0.077800       0.663000
56785     56785     yunnan         103.0197       25.2000          139       132     2012      08        30        243              0.000000      21.575531       0.279174       0.285856       0.230000       0.126600   -9999.000000       0.558000
56785     56785     yunnan         103.0197       25.2000          139       132     2012      08        31        244              0.000000      21.675446       0.000000       0.284323       0.232500   -9999.000000   -9999.000000       0.560000
56785     56785     yunnan         103.0197       25.2000          139       132     2012      09        01        245              0.000000      21.682434      10.664951       0.282720   -9999.000000       0.185300       0.082000       0.764000
56785     56785     yunnan         103.0197       25.2000          139       132     2012      09        02        246              0.000000      21.485107       2.746022       0.294413   -9999.000000       0.127000       0.084700   -9999.000000
56785     56785     yunnan         103.0197       25.2000          139       132     2012      09        03        247              0.000000      17.748383       0.000000       0.298753       0.262000   -9999.000000       0.110400       0.597000
56785     56785     yunnan         103.0197       25.2000          139       132     2012      09        04        248              0.000000      19.547119       0.000000       0.285323       0.260500       0.226000   -9999.000000       0.543000
56785     56785     yunnan         103.0197       25.2000          139       132     2012      09        05        249              0.000000      19.834534       0.535094       0.281483       0.271500   -9999.000000   -9999.000000       0.633000
56785     56785     yunnan         103.0197       25.2000          139       132     2012      09        06        250              0.000000      20.223175       0.690479       0.279227       0.264000       0.246300   -9999.000000       0.589000
56785     56785     yunnan         103.0197       25.2000          139       132     2012      09        07        251              0.000000      20.289581       0.083617       0.277331   -9999.000000       0.206100       0.106500   -9999.000000
56785     56785     yunnan         103.0197       25.2000          139       132     2012      09        08        252              0.000000      19.880249       0.000000       0.276787   -9999.000000   -9999.000000       0.106200       0.342000
56785     56785     yunnan         103.0197       25.2000          139       132     2012      09        09        253              0.000000      20.775482      13.361713       0.274769       0.196000       0.086500       0.100700   -9999.000000
56785     56785     yunnan         103.0197       25.2000          139       132     2012      09        10        254              0.260000      21.980591       0.961363       0.288815       0.248000   -9999.000000   -9999.000000       0.708000
56785     56785     yunnan         103.0197       25.2000          139       132     2012      09        11        255              0.274417      21.097168      16.821526       0.292855       0.240000       0.136200   -9999.000000       0.685000
56785     56785     yunnan         103.0197       25.2000          139       132     2012      09        12        256              0.329417      19.731354      51.754086       0.303437   -9999.000000       0.284900   -9999.000000   -9999.000000
56785     56785     yunnan         103.0197       25.2000          139       132     2012      09        13        257              0.317375      16.694855       8.696711       0.343069   -9999.000000   -9999.000000       0.070100       0.763000
56785     56785     yunnan         103.0197       25.2000          139       132     2012      09        14        258              0.301875      15.317596       0.672008       0.319054       0.231000       0.239600       0.066300   -9999.000000
56785     56785     yunnan         103.0197       25.2000          139       132     2012      09        15        259              0.298375      15.801483       0.352579       0.307855       0.259500   -9999.000000       0.065400       0.872000
56785     56785     yunnan         103.0197       25.2000          139       132     2012      09        16        260              0.297625      15.995117       0.149727       0.304358       0.267000       0.155400   -9999.000000       0.752000
56785     56785     yunnan         103.0197       25.2000          139       132     2012      09        17        261              0.299792      16.764099       1.414259       0.301753       0.275000       0.218900   -9999.000000       0.559000
56785     56785     yunnan         103.0197       25.2000          139       132     2012      09        18        262              0.310042      16.591064       7.587130       0.301320   -9999.000000   -9999.000000       0.083200       0.907000
56785     56785     yunnan         103.0197       25.2000          139       132     2012      09        19        263              0.304625      17.456757       2.128049       0.305882   -9999.000000       0.242200       0.080200   -9999.000000
56785     56785     yunnan         103.0197       25.2000          139       132     2012      09        20        264              0.302000      16.043121       0.000000       0.305338       0.221000   -9999.000000       0.077700       0.764000
56785     56785     yunnan         103.0197       25.2000          139       132     2012      09        21        265              0.300125      17.924286       0.048803       0.298537   -9999.000000   -9999.000000   -9999.000000   -9999.000000
56785     56785     yunnan         103.0197       25.2000          139       132     2012      09        22        266              0.298292      18.089630       0.000000       0.296073       0.160500       0.415200   -9999.000000       0.720000
56785     56785     yunnan         103.0197       25.2000          139       132     2012      09        23        267              0.303250      18.541351       2.656365       0.294110   -9999.000000   -9999.000000   -9999.000000       0.769000
56785     56785     yunnan         103.0197       25.2000          139       132     2012      09        24        268              0.302792      19.568939       3.086316       0.292484   -9999.000000       0.232400       0.052500   -9999.000000
56785     56785     yunnan         103.0197       25.2000          139       132     2012      09        25        269              0.308667      20.296417      11.186661       0.294045       0.153000       0.158000       0.054300       0.775000
56785     56785     yunnan         103.0197       25.2000          139       132     2012      09        26        270              0.306208      19.350800       5.949258       0.308239       0.158500   -9999.000000       0.050700   -9999.000000
56785     56785     yunnan         103.0197       25.2000          139       132     2012      09        27        271              0.324000      19.540955      29.627728       0.309671       0.194000       0.384300   -9999.000000       1.000000
56785     56785     yunnan         103.0197       25.2000          139       132     2012      09        28        272              0.304133      17.761505       0.514778       0.330996   -9999.000000   -9999.000000   -9999.000000       0.821000
56785     56785     yunnan         103.0197       25.2000          139       132     2012      09        29        273              0.302958      16.457153       0.282084       0.308941   -9999.000000       0.565700   -9999.000000       0.751000
56785     56785     yunnan         103.0197       25.2000          139       132     2012      09        30        274              0.301375      17.138306       2.194612       0.304894       0.180000   -9999.000000       0.056000       0.791000
56785     56785     yunnan         103.0197       25.2000          139       132     2012      10        01        275              0.301208      15.701263       1.043582       0.304125       0.182000   -9999.000000       0.046200   -9999.000000
56785     56785     yunnan         103.0197       25.2000          139       132     2012      10        02        276              0.301750      15.730988       0.183647       0.302741       0.171000       0.173400       0.040900       0.730000
56785     56785     yunnan         103.0197       25.2000          139       132     2012      10        03        277              0.301375      16.710236       0.662328       0.299249       0.189500   -9999.000000   -9999.000000       0.677000
56785     56785     yunnan         103.0197       25.2000          139       132     2012      10        04        278              0.303250      16.273010       1.625998       0.297470   -9999.000000       0.176600   -9999.000000       0.936000
56785     56785     yunnan         103.0197       25.2000          139       132     2012      10        05        279              0.302917      17.668213       2.334042       0.297918   -9999.000000       0.127500       0.046800       0.794000
56785     56785     yunnan         103.0197       25.2000          139       132     2012      10        06        280              0.308000      17.017456       2.575197       0.297209       0.171000   -9999.000000       0.051900   -9999.000000
56785     56785     yunnan         103.0197       25.2000          139       132     2012      10        07        281              0.303708      16.088684       0.280660       0.300900       0.176500       0.372700       0.041900       0.544000
56785     56785     yunnan         103.0197       25.2000          139       132     2012      10        08        282              0.302458      16.891998       0.137266       0.297512       0.169000   -9999.000000   -9999.000000   -9999.000000
56785     56785     yunnan         103.0197       25.2000          139       132     2012      10        09        283              0.300833      17.140930       0.075897       0.293816   -9999.000000   -9999.000000   -9999.000000       0.687000
56785     56785     yunnan         103.0197       25.2000          139       132     2012      10        10        284              0.299792      16.251892       0.000000       0.292460   -9999.000000       0.386400   -9999.000000       0.714000
56785     56785     yunnan         103.0197       25.2000          139       132     2012      10        11        285              0.298583      16.022980       0.000000       0.291549       0.248000   -9999.000000       0.082000   -9999.000000
56785     56785     yunnan         103.0197       25.2000          139       132     2012      10        12        286              0.297333      17.263489       0.320978       0.289344       0.254500       0.344000       0.082500       0.662000
56785     56785     yunnan         103.0197       25.2000          139       132     2012      10        13        287              0.295875      16.781738       0.134265       0.289550       0.246000       0.174900       0.077700   -9999.000000
56785     56785     yunnan         103.0197       25.2000          139       132     2012      10        14        288              0.293542      17.810547      12.083923       0.287438       0.249000   -9999.000000   -9999.000000       0.509000
56785     56785     yunnan         103.0197       25.2000          139       132     2012      10        15        289              0.290417      18.004639       0.000000       0.284536   -9999.000000       0.270300   -9999.000000       0.635000
56785     56785     yunnan         103.0197       25.2000          139       132     2012      10        16        290              0.287792      18.037262       0.000000       0.282231   -9999.000000   -9999.000000   -9999.000000       0.590000
56785     56785     yunnan         103.0197       25.2000          139       132     2012      10        17        291              0.285542      18.074493       0.000000       0.280815       0.236500       0.225600       0.128300       0.705000
56785     56785     yunnan         103.0197       25.2000          139       132     2012      10        18        292              0.282750      15.748260       0.000000       0.280306       0.235000       0.159100       0.127400   -9999.000000
56785     56785     yunnan         103.0197       25.2000          139       132     2012      10        19        293              0.278708      16.596558       0.000000       0.278213       0.237000   -9999.000000   -9999.000000       0.496000
56785     56785     yunnan         103.0197       25.2000          139       132     2012      10        20        294              0.276000      16.815674       0.000000       0.275788   -9999.000000       0.190900   -9999.000000   -9999.000000
56785     56785     yunnan         103.0197       25.2000          139       132     2012      10        21        295              0.273458      16.544922       0.000000       0.273818   -9999.000000   -9999.000000   -9999.000000       0.509000
56785     56785     yunnan         103.0197       25.2000          139       132     2012      10        22        296              0.271000      16.219025       0.000000       0.272115   -9999.000000       0.229200       0.145100       0.523000
56785     56785     yunnan         103.0197       25.2000          139       132     2012      10        23        297              0.268250      15.918610       0.000000       0.271696   -9999.000000       0.144100       0.148100   -9999.000000
56785     56785     yunnan         103.0197       25.2000          139       132     2012      10        24        298              0.265708      15.697968       0.000000       0.269966   -9999.000000   -9999.000000       0.146600       0.512000
56785     56785     yunnan         103.0197       25.2000          139       132     2012      10        25        299              0.000000      15.922150       0.000000       0.268821       0.254000       0.149500   -9999.000000   -9999.000000
56785     56785     yunnan         103.0197       25.2000          139       132     2012      10        26        300              0.261583      15.773682       0.000000       0.267599   -9999.000000   -9999.000000   -9999.000000       0.495000
56785     56785     yunnan         103.0197       25.2000          139       132     2012      10        27        301              0.259375      15.427734       0.000000       0.266552       0.264000   -9999.000000   -9999.000000       0.465000
56785     56785     yunnan         103.0197       25.2000          139       132     2012      10        28        302              0.000000      15.681915       0.000000       0.267196       0.252500       0.263200       0.150500       0.332000
56785     56785     yunnan         103.0197       25.2000          139       132     2012      10        29        303              0.257625      16.116760       0.000000       0.267426       0.261500   -9999.000000       0.159000       0.429000
56785     56785     yunnan         103.0197       25.2000          139       132     2012      10        30        304              0.255708      17.021851       4.003065       0.266989       0.297000       0.282900       0.152600   -9999.000000
56785     56785     yunnan         103.0197       25.2000          139       132     2012      10        31        305              0.255625      12.733429       0.542957       0.281147   -9999.000000       0.100100   -9999.000000       0.074000
56785     56785     yunnan         103.0197       25.2000          139       132     2012      11        01        306              0.255500      13.279694       0.000000       0.273798   -9999.000000   -9999.000000   -9999.000000       0.403000
56785     56785     yunnan         103.0197       25.2000          139       132     2012      11        02        307              0.255167      13.949799       0.000000       0.271224       0.268000       0.083400       0.146700       0.339000
56785     56785     yunnan         103.0197       25.2000          139       132     2012      11        03        308              0.255083      13.795502       0.000000       0.269109       0.299000   -9999.000000       0.151500       0.452000
56785     56785     yunnan         103.0197       25.2000          139       132     2012      11        04        309              0.253958      14.390503       0.000000       0.268315       0.311000       0.261600       0.159300   -9999.000000
56785     56785     yunnan         103.0197       25.2000          139       132     2012      11        05        310              0.253750      13.794250       0.000000       0.268812   -9999.000000       0.093700   -9999.000000       0.130000
56785     56785     yunnan         103.0197       25.2000          139       132     2012      11        06        311              0.252792      14.926025       0.230698       0.267889   -9999.000000   -9999.000000   -9999.000000   -9999.000000
56785     56785     yunnan         103.0197       25.2000          139       132     2012      11        07        312              0.252625      14.956818       1.944403       0.268901       0.296000       0.352100   -9999.000000       0.396000
56785     56785     yunnan         103.0197       25.2000          139       132     2012      11        08        313              0.251833      14.853607       0.095501       0.274863       0.299000   -9999.000000       0.162700       0.460000
56785     56785     yunnan         103.0197       25.2000          139       132     2012      11        09        314              0.251333      14.140137       0.000000       0.270684       0.299500       0.198500       0.167000   -9999.000000
56785     56785     yunnan         103.0197       25.2000          139       132     2012      11        10        315              0.250000      14.150787       0.000000       0.267329       0.306000       0.110300       0.157900       0.015000
56785     56785     yunnan         103.0197       25.2000          139       132     2012      11        11        316              0.248792      14.020203       0.000000       0.266314   -9999.000000   -9999.000000   -9999.000000   -9999.000000
56785     56785     yunnan         103.0197       25.2000          139       132     2012      11        12        317              0.248458      12.634094       0.000000       0.266822   -9999.000000       0.353400   -9999.000000       0.228000
56785     56785     yunnan         103.0197       25.2000          139       132     2012      11        13        318              0.000000      13.200104       0.000000       0.265711       0.256500   -9999.000000   -9999.000000       0.399000
56785     56785     yunnan         103.0197       25.2000          139       132     2012      11        14        319              0.246667      14.030731       0.000000       0.264676       0.276500   -9999.000000       0.164000       0.399000
56785     56785     yunnan         103.0197       25.2000          139       132     2012      11        15        320              0.246375      14.205750       0.515261       0.264255       0.299000       0.436500       0.160500       0.558000
56785     56785     yunnan         103.0197       25.2000          139       132     2012      11        16        321              0.245625      14.714050       5.221899       0.264666   -9999.000000   -9999.000000       0.169000   -9999.000000
56785     56785     yunnan         103.0197       25.2000          139       132     2012      11        17        322              0.000000      12.508759       0.000000       0.284556   -9999.000000       0.156800   -9999.000000       0.223000
56785     56785     yunnan         103.0197       25.2000          139       132     2012      11        18        323              0.245250      12.635284       0.000000       0.271805       0.262500       0.227100   -9999.000000   -9999.000000
56785     56785     yunnan         103.0197       25.2000          139       132     2012      11        19        324              0.246583      12.771332       0.000000       0.269048       0.295500   -9999.000000       0.158800       0.429000
56785     56785     yunnan         103.0197       25.2000          139       132     2012      11        20        325              0.248458      13.941040       0.328325       0.266825       0.286500       0.262600       0.171500       0.417000
56785     56785     yunnan         103.0197       25.2000          139       132     2012      11        21        326              0.249333      14.618378      24.953178       0.264629       0.300000   -9999.000000       0.159200   -9999.000000
56785     56785     yunnan         103.0197       25.2000          139       132     2012      11        22        327              0.248375      14.396210       0.000000       0.262811   -9999.000000       0.109900   -9999.000000       0.287000
56785     56785     yunnan         103.0197       25.2000          139       132     2012      11        23        328              0.245583      13.569061       0.000000       0.261492       0.316000       0.088600   -9999.000000   -9999.000000
56785     56785     yunnan         103.0197       25.2000          139       132     2012      11        24        329              0.244125      13.060120       0.000000       0.261367       0.308000   -9999.000000   -9999.000000       0.358000
56785     56785     yunnan         103.0197       25.2000          139       132     2012      11        25        330              0.242125      13.336273       0.000000       0.260711       0.320000       0.189600       0.170300       0.152000
56785     56785     yunnan         103.0197       25.2000          139       132     2012      11        26        331              0.240917      13.054749       0.000000       0.260258       0.340500   -9999.000000   -9999.000000       0.202000
56785     56785     yunnan         103.0197       25.2000          139       132     2012      11        27        332              0.239833      12.357849       0.000000       0.260809   -9999.000000   -9999.000000       0.169500       0.280000
56785     56785     yunnan         103.0197       25.2000          139       132     2012      11        28        333              0.239375      12.606598       0.000000       0.260167   -9999.000000       0.175100   -9999.000000   -9999.000000
56785     56785     yunnan         103.0197       25.2000          139       132     2012      11        29        334              0.238750      12.358002       0.000000       0.259658       0.284000   -9999.000000   -9999.000000       0.136000
56785     56785     yunnan         103.0197       25.2000          139       132     2012      11        30        335              0.238375      12.204041       0.000000       0.258939       0.322500       0.171800   -9999.000000       0.184000
56785     56785     yunnan         103.0197       25.2000          139       132     2012      12        01        336              0.237500      12.228699       0.000000       0.258302       0.314500   -9999.000000       0.184600       0.176000
56785     56785     yunnan         103.0197       25.2000          139       132     2012      12        02        337              0.236792      12.076477       0.000000       0.258081   -9999.000000   -9999.000000       0.181400       0.370000
56785     56785     yunnan         103.0197       25.2000          139       132     2012      12        03        338              0.235833      11.774292       0.000000       0.257729   -9999.000000       0.256100   -9999.000000   -9999.000000
56785     56785     yunnan         103.0197       25.2000          139       132     2012      12        04        339              0.235792      11.700012       0.000000       0.257572       0.302000   -9999.000000   -9999.000000       0.128000
56785     56785     yunnan         103.0197       25.2000          139       132     2012      12        05        340              0.234625      11.486267       0.000000       0.256693       0.306500       0.122200   -9999.000000   -9999.000000
56785     56785     yunnan         103.0197       25.2000          139       132     2012      12        06        341              0.234417       8.884277       0.000000       0.258750       0.302000       0.175400       0.155700       0.194000
56785     56785     yunnan         103.0197       25.2000          139       132     2012      12        07        342              0.233250      10.291718       0.000000       0.258768       0.332000   -9999.000000       0.160100       0.152000
56785     56785     yunnan         103.0197       25.2000          139       132     2012      12        08        343              0.233375       9.040924       0.000000       0.260231   -9999.000000       0.185300       0.152700   -9999.000000
56785     56785     yunnan         103.0197       25.2000          139       132     2012      12        09        344              0.233583       9.370483       0.000000       0.260942   -9999.000000   -9999.000000   -9999.000000       0.019000
56785     56785     yunnan         103.0197       25.2000          139       132     2012      12        10        345              0.233458      10.592133       5.449581       0.259904       0.279000       0.128000   -9999.000000   -9999.000000
56785     56785     yunnan         103.0197       25.2000          139       132     2012      12        11        346              0.233250      10.782654       0.000000       0.258605       0.253000       0.090900   -9999.000000       0.268000
56785     56785     yunnan         103.0197       25.2000          139       132     2012      12        12        347              0.232792       9.828339       0.000000       0.258674       0.260000   -9999.000000       0.144600       0.224000
56785     56785     yunnan         103.0197       25.2000          139       132     2012      12        13        348              0.232750      10.545441       0.000000       0.257889   -9999.000000       0.237300       0.144300       0.152000
56785     56785     yunnan         103.0197       25.2000          139       132     2012      12        14        349              0.232125      10.521606       0.000000       0.256718   -9999.000000   -9999.000000       0.141100       0.287000
56785     56785     yunnan         103.0197       25.2000          139       132     2012      12        15        350              0.000000      10.441772       0.000000       0.255645       0.199000       0.229000   -9999.000000   -9999.000000
56785     56785     yunnan         103.0197       25.2000          139       132     2012      12        16        351              0.231167       9.922882       0.000000       0.254807       0.237000       0.131100   -9999.000000       0.211000
56785     56785     yunnan         103.0197       25.2000          139       132     2012      12        17        352              0.231583      10.127472       0.000000       0.254097       0.255500   -9999.000000       0.137300   -9999.000000
56785     56785     yunnan         103.0197       25.2000          139       132     2012      12        18        353              0.230667      10.330627       0.000000       0.253282       0.242000       0.229400       0.144900       0.231000
56785     56785     yunnan         103.0197       25.2000          139       132     2012      12        19        354              0.230875       8.708954       0.000000       0.254816   -9999.000000   -9999.000000       0.142200       0.212000
56785     56785     yunnan         103.0197       25.2000          139       132     2012      12        20        355              0.000000      10.730164       2.720772       0.253596       0.237000       0.248800   -9999.000000   -9999.000000
56785     56785     yunnan         103.0197       25.2000          139       132     2012      12        21        356              0.230292      10.630188       0.000000       0.251582       0.300000       0.113400   -9999.000000       0.139000
56785     56785     yunnan         103.0197       25.2000          139       132     2012      12        22        357              0.229750      10.110138       0.000000       0.251143       0.348000   -9999.000000   -9999.000000   -9999.000000
56785     56785     yunnan         103.0197       25.2000          139       132     2012      12        23        358              0.227958       9.845764       0.671355       0.251467       0.353000       0.105500       0.139300       0.123000
56785     56785     yunnan         103.0197       25.2000          139       132     2012      12        24        359              0.228450       5.583649       0.000000       0.253392   -9999.000000       0.150300       0.142300       0.195000
56785     56785     yunnan         103.0197       25.2000          139       132     2012      12        25        360              0.229292       8.571960       1.239218       0.252829   -9999.000000   -9999.000000       0.136200       0.003000
56785     56785     yunnan         103.0197       25.2000          139       132     2012      12        26        361              0.000000       9.523651       0.000000       0.251449       0.283000       0.227400   -9999.000000       0.122000
56785     56785     yunnan         103.0197       25.2000          139       132     2012      12        27        362              0.228167       9.089417       0.000000       0.251144       0.319000   -9999.000000   -9999.000000   -9999.000000
56785     56785     yunnan         103.0197       25.2000          139       132     2012      12        28        363              0.000000       8.819763       0.000000       0.250248       0.325000       0.180300   -9999.000000       0.168000
56785     56785     yunnan         103.0197       25.2000          139       132     2012      12        29        364              0.000000       9.542938       0.000000       0.249697   -9999.000000       0.237200       0.150100       0.116000
56785     56785     yunnan         103.0197       25.2000          139       132     2012      12        30        365              0.000000       7.213379       0.000000       0.247791   -9999.000000   -9999.000000       0.152900   -9999.000000
56785     56785     yunnan         103.0197       25.2000          139       132     2012      12        31        366              0.226000       1.841339       0.000000       0.237703       0.332000   -9999.000000       0.134400       0.168000
