# Supplementary material for: Research on Fusing Multisatellite Soil Moisture Data Based on Bayesian Model Averaging
Source: Hindawi journal article supplement (doi:10.1155/2018/9310838), 2018-06-25
Supplement: f1 [file 9310838.f1.zip › 2012_sm00-10cm_daily_ZDB_ZHY_56792_366days_allin.txt]

56792     56792     guizhou        104.9631       25.7892          137       140     2012      01        01        001              0.000000   -9999.000000       1.553741   -9999.000000       0.169500       0.103800   -9999.000000   -9999.000000
56792     56792     guizhou        104.9631       25.7892          137       140     2012      01        02        002              0.509167       2.999756       1.745338       0.255809   -9999.000000       0.333500   -9999.000000   -9999.000000
56792     56792     guizhou        104.9631       25.7892          137       140     2012      01        03        003              0.000000       4.175934       4.651544       0.268779   -9999.000000   -9999.000000       0.038400       0.558000
56792     56792     guizhou        104.9631       25.7892          137       140     2012      01        04        004              0.523348       2.577606       2.191737       0.275524   -9999.000000   -9999.000000       0.033400       0.393000
56792     56792     guizhou        104.9631       25.7892          137       140     2012      01        05        005              0.514792       1.707275       1.466933       0.265709       0.163000   -9999.000000       0.029500   -9999.000000
56792     56792     guizhou        104.9631       25.7892          137       140     2012      01        06        006              0.512682       2.321960       0.905362       0.266133   -9999.000000   -9999.000000   -9999.000000       0.213000
56792     56792     guizhou        104.9631       25.7892          137       140     2012      01        07        007              0.513500       2.140869       0.979183       0.265413   -9999.000000   -9999.000000   -9999.000000   -9999.000000
56792     56792     guizhou        104.9631       25.7892          137       140     2012      01        08        008              0.000000       2.228363       0.478302       0.264641   -9999.000000   -9999.000000   -9999.000000       0.521000
56792     56792     guizhou        104.9631       25.7892          137       140     2012      01        09        009              0.515833       2.453766       0.817707       0.265204       0.172500       0.184000       0.023400       0.664000
56792     56792     guizhou        104.9631       25.7892          137       140     2012      01        10        010              0.515125       3.042572       1.208810       0.267365       0.168000   -9999.000000       0.034100       0.412000
56792     56792     guizhou        104.9631       25.7892          137       140     2012      01        11        011              0.513261       4.035492       0.362321       0.269922       0.134000       0.037200       0.026800       0.411000
56792     56792     guizhou        104.9631       25.7892          137       140     2012      01        12        012              0.509261       3.147125       0.911851       0.269268   -9999.000000       0.129100   -9999.000000   -9999.000000
56792     56792     guizhou        104.9631       25.7892          137       140     2012      01        13        013              0.507083       7.939178       1.032077       0.266175   -9999.000000   -9999.000000   -9999.000000       0.418000
56792     56792     guizhou        104.9631       25.7892          137       140     2012      01        14        014              0.514783       7.843719       0.170342       0.268178       0.154000       0.100300       0.033500       0.467000
56792     56792     guizhou        104.9631       25.7892          137       140     2012      01        15        015              0.515417       7.179932       0.114754       0.266947       0.127000   -9999.000000       0.031400       0.186000
56792     56792     guizhou        104.9631       25.7892          137       140     2012      01        16        016              0.501591       4.369629       0.000000       0.265286       0.130000   -9999.000000       0.038000       0.338000
56792     56792     guizhou        104.9631       25.7892          137       140     2012      01        17        017              0.000000       9.847137       0.208197       0.260899       0.114000       0.054400   -9999.000000   -9999.000000
56792     56792     guizhou        104.9631       25.7892          137       140     2012      01        18        018              0.486000       5.812256       0.532552       0.261691   -9999.000000   -9999.000000   -9999.000000       0.309000
56792     56792     guizhou        104.9631       25.7892          137       140     2012      01        19        019              0.485095       4.385498       0.687768       0.261972   -9999.000000       0.155000   -9999.000000   -9999.000000
56792     56792     guizhou        104.9631       25.7892          137       140     2012      01        20        020              0.480625       6.343506       0.959309       0.261128       0.135500       0.091100       0.038700       0.132000
56792     56792     guizhou        104.9631       25.7892          137       140     2012      01        21        021              0.469870       8.749359       0.388608       0.259538       0.121500   -9999.000000       0.040200       0.117000
56792     56792     guizhou        104.9631       25.7892          137       140     2012      01        22        022              0.457792       5.168213       0.236653       0.260531       0.121000       0.148000       0.029600   -9999.000000
56792     56792     guizhou        104.9631       25.7892          137       140     2012      01        23        023              0.454000       2.398895       0.256253       0.256081   -9999.000000   -9999.000000   -9999.000000       0.163000
56792     56792     guizhou        104.9631       25.7892          137       140     2012      01        24        024              0.454000       2.521576       0.356145       0.254561   -9999.000000   -9999.000000   -9999.000000   -9999.000000
56792     56792     guizhou        104.9631       25.7892          137       140     2012      01        25        025              0.455250       1.944244       0.883434       0.246948   -9999.000000       0.065700   -9999.000000       0.060000
56792     56792     guizhou        104.9631       25.7892          137       140     2012      01        26        026              0.459435       1.478363       0.306899       0.236816   -9999.000000   -9999.000000       0.028800       0.341000
56792     56792     guizhou        104.9631       25.7892          137       140     2012      01        27        027              0.467667       1.584473       0.356852       0.242361       0.108000       0.168700       0.028300       0.278000
56792     56792     guizhou        104.9631       25.7892          137       140     2012      01        28        028              0.474217       2.298553       0.615680       0.253824   -9999.000000   -9999.000000       0.020300       0.503000
56792     56792     guizhou        104.9631       25.7892          137       140     2012      01        29        029              0.482167       2.445404       0.459224       0.256824   -9999.000000       0.096600   -9999.000000   -9999.000000
56792     56792     guizhou        104.9631       25.7892          137       140     2012      01        30        030              0.494087       2.644196       0.210849       0.257922   -9999.000000       0.274700   -9999.000000       0.219000
56792     56792     guizhou        104.9631       25.7892          137       140     2012      01        31        031              0.497364       2.456848       0.059904       0.256697       0.101000   -9999.000000       0.044700   -9999.000000
56792     56792     guizhou        104.9631       25.7892          137       140     2012      02        01        032              0.496500       2.577118       5.299070       0.257663       0.100500       0.226900       0.049400       0.397000
56792     56792     guizhou        104.9631       25.7892          137       140     2012      02        02        033              0.503870       3.975128       0.823798       0.261028       0.115000   -9999.000000       0.047800       0.468000
56792     56792     guizhou        104.9631       25.7892          137       140     2012      02        03        034              0.501609       3.444214       0.000000       0.263286   -9999.000000   -9999.000000   -9999.000000   -9999.000000
56792     56792     guizhou        104.9631       25.7892          137       140     2012      02        04        035              0.499600       5.384644       0.000000       0.262854       0.115000       0.209100   -9999.000000       0.142000
56792     56792     guizhou        104.9631       25.7892          137       140     2012      02        05        036              0.493625       9.913635       0.000000       0.259482       0.111000   -9999.000000   -9999.000000   -9999.000000
56792     56792     guizhou        104.9631       25.7892          137       140     2012      02        06        037              0.485235      11.901581       0.000000       0.256583       0.101000       0.019400       0.037900       0.135000
56792     56792     guizhou        104.9631       25.7892          137       140     2012      02        07        038              0.473167       7.387878       0.418305       0.257520   -9999.000000       0.244100       0.041000       0.153000
56792     56792     guizhou        104.9631       25.7892          137       140     2012      02        08        039              0.466667       5.227875       0.856741       0.258882   -9999.000000   -9999.000000       0.031000       0.161000
56792     56792     guizhou        104.9631       25.7892          137       140     2012      02        09        040              0.477304       3.765717       0.227989       0.262855   -9999.000000       0.029700   -9999.000000       0.180000
56792     56792     guizhou        104.9631       25.7892          137       140     2012      02        10        041              0.472625       6.640137       0.245669       0.260187   -9999.000000   -9999.000000   -9999.000000   -9999.000000
56792     56792     guizhou        104.9631       25.7892          137       140     2012      02        11        042              0.475750       2.953979       0.417268       0.257779       0.135000       0.120700   -9999.000000       0.302000
56792     56792     guizhou        104.9631       25.7892          137       140     2012      02        12        043              0.483091       4.722443       0.000000       0.260705       0.127000   -9999.000000       0.026600       0.227000
56792     56792     guizhou        104.9631       25.7892          137       140     2012      02        13        044              0.484870      11.307617       0.000000       0.257060   -9999.000000   -9999.000000       0.047600       0.138000
56792     56792     guizhou        104.9631       25.7892          137       140     2012      02        14        045              0.477478      14.433868       0.000000       0.251989   -9999.000000       0.082100   -9999.000000       0.284000
56792     56792     guizhou        104.9631       25.7892          137       140     2012      02        15        046              0.455875      14.900085       0.332040       0.247500       0.123500   -9999.000000   -9999.000000   -9999.000000
56792     56792     guizhou        104.9631       25.7892          137       140     2012      02        16        047              0.445000       6.978058       0.355891       0.251961       0.125500       0.012900   -9999.000000       0.322000
56792     56792     guizhou        104.9631       25.7892          137       140     2012      02        17        048              0.445000       5.248566       0.124346       0.255616       0.132500   -9999.000000       0.059900   -9999.000000
56792     56792     guizhou        104.9631       25.7892          137       140     2012      02        18        049              0.000000       3.911896       0.000000       0.256700   -9999.000000   -9999.000000       0.054700       0.193000
56792     56792     guizhou        104.9631       25.7892          137       140     2012      02        19        050              0.469000       2.914948       0.619870       0.254098   -9999.000000   -9999.000000       0.045800       0.337000
56792     56792     guizhou        104.9631       25.7892          137       140     2012      02        20        051              0.475583       5.763275       0.215554       0.258633       0.136000   -9999.000000   -9999.000000   -9999.000000
56792     56792     guizhou        104.9631       25.7892          137       140     2012      02        21        052              0.474435       9.619629       0.237997       0.255822       0.095000   -9999.000000   -9999.000000       0.252000
56792     56792     guizhou        104.9631       25.7892          137       140     2012      02        22        053              0.472412      11.183990       7.229456       0.254131       0.092500       0.110700   -9999.000000   -9999.000000
56792     56792     guizhou        104.9631       25.7892          137       140     2012      02        23        054              0.000000      14.516449       0.220994       0.250293       0.073000   -9999.000000       0.038800       0.081000
56792     56792     guizhou        104.9631       25.7892          137       140     2012      02        24        055              0.445294       9.106873       1.094905       0.253160   -9999.000000       0.065500       0.040500       0.227000
56792     56792     guizhou        104.9631       25.7892          137       140     2012      02        25        056              0.441739       8.515869       0.974137       0.256997       0.114000       0.098700       0.031700       0.310000
56792     56792     guizhou        104.9631       25.7892          137       140     2012      02        26        057              0.440522       6.439575       1.022484       0.260551       0.103000   -9999.000000   -9999.000000       0.321000
56792     56792     guizhou        104.9631       25.7892          137       140     2012      02        27        058              0.444783       4.081573       0.411914       0.261439       0.100000       0.089300   -9999.000000   -9999.000000
56792     56792     guizhou        104.9631       25.7892          137       140     2012      02        28        059              0.452083       3.998199       0.305481       0.261744       0.092000   -9999.000000   -9999.000000       0.103000
56792     56792     guizhou        104.9631       25.7892          137       140     2012      02        29        060              0.000000   -9999.000000       0.122343   -9999.000000   -9999.000000       0.169500   -9999.000000   -9999.000000
56792     56792     guizhou        104.9631       25.7892          137       140     2012      03        01        061              0.465391       5.613098       1.266990       0.259919   -9999.000000   -9999.000000       0.037300       0.245000
56792     56792     guizhou        104.9631       25.7892          137       140     2012      03        02        062              0.469667      13.062683       9.560619       0.257632       0.125000   -9999.000000       0.031600       0.305000
56792     56792     guizhou        104.9631       25.7892          137       140     2012      03        03        063              0.495565      11.592834      15.153813       0.274532       0.149000       0.344800   -9999.000000   -9999.000000
56792     56792     guizhou        104.9631       25.7892          137       140     2012      03        04        064              0.505750      11.942535       1.775661       0.305465       0.132500   -9999.000000   -9999.000000       0.311000
56792     56792     guizhou        104.9631       25.7892          137       140     2012      03        05        065              0.493087      12.967407       0.000000       0.287476   -9999.000000       0.389900       0.046600   -9999.000000
56792     56792     guizhou        104.9631       25.7892          137       140     2012      03        06        066              0.477875      15.141876       0.000000       0.270221   -9999.000000       0.137800       0.048400       0.261000
56792     56792     guizhou        104.9631       25.7892          137       140     2012      03        07        067              0.000000      15.037994       0.971311       0.263195       0.123500   -9999.000000       0.039800       0.169000
56792     56792     guizhou        104.9631       25.7892          137       140     2012      03        08        068              0.429667      10.808075       0.266903       0.262144       0.133000       0.102400   -9999.000000       0.006000
56792     56792     guizhou        104.9631       25.7892          137       140     2012      03        09        069              0.417130       7.775391       1.065938       0.262042       0.130000   -9999.000000   -9999.000000       0.231000
56792     56792     guizhou        104.9631       25.7892          137       140     2012      03        10        070              0.422783       5.677917       0.375938       0.264262   -9999.000000   -9999.000000   -9999.000000   -9999.000000
56792     56792     guizhou        104.9631       25.7892          137       140     2012      03        11        071              0.429708       5.350159       0.489741       0.264854   -9999.000000       0.107000       0.053700       0.269000
56792     56792     guizhou        104.9631       25.7892          137       140     2012      03        12        072              0.439125       6.148834       1.535000       0.264511       0.171000   -9999.000000       0.062800       0.364000
56792     56792     guizhou        104.9631       25.7892          137       140     2012      03        13        073              0.459208       5.968048       1.032537       0.268197       0.155000       0.086800       0.055200       0.277000
56792     56792     guizhou        104.9631       25.7892          137       140     2012      03        14        074              0.466739       6.553986       0.000000       0.265125       0.136500       0.201800   -9999.000000       0.483000
56792     56792     guizhou        104.9631       25.7892          137       140     2012      03        15        075              0.465542      13.686676       0.000000       0.258597       0.120000   -9999.000000   -9999.000000   -9999.000000
56792     56792     guizhou        104.9631       25.7892          137       140     2012      03        16        076              0.455913      17.641663       0.000000       0.249409   -9999.000000       0.110800   -9999.000000       0.358000
56792     56792     guizhou        104.9631       25.7892          137       140     2012      03        17        077              0.438250      18.544220       0.000000       0.242985   -9999.000000   -9999.000000       0.054400   -9999.000000
56792     56792     guizhou        104.9631       25.7892          137       140     2012      03        18        078              0.426417      17.524506       0.000000       0.237913       0.124000   -9999.000000       0.056000       0.118000
56792     56792     guizhou        104.9631       25.7892          137       140     2012      03        19        079              0.413542      18.472778       0.395046       0.233730       0.115500       0.097700       0.051000       0.296000
56792     56792     guizhou        104.9631       25.7892          137       140     2012      03        20        080              0.405833      18.956238       0.000000       0.228556       0.115500   -9999.000000   -9999.000000   -9999.000000
56792     56792     guizhou        104.9631       25.7892          137       140     2012      03        21        081              0.397789      21.403137       0.000000       0.226183   -9999.000000       0.057400   -9999.000000       0.247000
56792     56792     guizhou        104.9631       25.7892          137       140     2012      03        22        082              0.388500      21.901581       0.224620       0.223095   -9999.000000   -9999.000000       0.057500   -9999.000000
56792     56792     guizhou        104.9631       25.7892          137       140     2012      03        23        083              0.376783      19.947815       3.807814       0.223033       0.122000       0.079500       0.058100   -9999.000000
56792     56792     guizhou        104.9631       25.7892          137       140     2012      03        24        084              0.377375      10.177826       0.000000       0.229575       0.114000       0.129300       0.048100       0.014000
56792     56792     guizhou        104.9631       25.7892          137       140     2012      03        25        085              0.000000      14.325958       1.168293       0.227514       0.107500   -9999.000000   -9999.000000       0.084000
56792     56792     guizhou        104.9631       25.7892          137       140     2012      03        26        086              0.369667      16.684479       0.226209       0.229149   -9999.000000       0.020300   -9999.000000       0.156000
56792     56792     guizhou        104.9631       25.7892          137       140     2012      03        27        087              0.372739      13.232666      14.085114       0.239688   -9999.000000   -9999.000000   -9999.000000   -9999.000000
56792     56792     guizhou        104.9631       25.7892          137       140     2012      03        28        088              0.402375      15.450562       0.414178       0.267798       0.146000       0.000500       0.054100       0.412000
56792     56792     guizhou        104.9631       25.7892          137       140     2012      03        29        089              0.418792      15.446320       0.737814       0.274544       0.129000       0.251800       0.054700   -9999.000000
56792     56792     guizhou        104.9631       25.7892          137       140     2012      03        30        090              0.414042      15.622833       4.548903       0.264837       0.124000   -9999.000000       0.046700       0.186000
56792     56792     guizhou        104.9631       25.7892          137       140     2012      03        31        091              0.417625      12.866180       0.310939       0.267336       0.128000       0.141600   -9999.000000       0.562000
56792     56792     guizhou        104.9631       25.7892          137       140     2012      04        01        092              0.416250      11.122223       0.000000       0.267672   -9999.000000       0.310500   -9999.000000   -9999.000000
56792     56792     guizhou        104.9631       25.7892          137       140     2012      04        02        093              0.404125      17.432922       0.000000       0.255334       0.134000   -9999.000000       0.060600       0.045000
56792     56792     guizhou        104.9631       25.7892          137       140     2012      04        03        094              0.379542      21.760010       0.000000       0.245593       0.123500       0.052900       0.061200   -9999.000000
56792     56792     guizhou        104.9631       25.7892          137       140     2012      04        04        095              0.363417      19.112915       0.481631       0.245354       0.123500   -9999.000000       0.062900       0.195000
56792     56792     guizhou        104.9631       25.7892          137       140     2012      04        05        096              0.346333      20.818909       0.000000       0.240993       0.110000       0.042900   -9999.000000       0.192000
56792     56792     guizhou        104.9631       25.7892          137       140     2012      04        06        097              0.329783      19.098022       0.451311       0.238429   -9999.000000       0.124200   -9999.000000       0.002000
56792     56792     guizhou        104.9631       25.7892          137       140     2012      04        07        098              0.322417      14.777100       2.789172       0.241845   -9999.000000   -9999.000000   -9999.000000       0.117000
56792     56792     guizhou        104.9631       25.7892          137       140     2012      04        08        099              0.328833      13.267853       3.339644       0.243988       0.153000       0.072700       0.065400   -9999.000000
56792     56792     guizhou        104.9631       25.7892          137       140     2012      04        09        100              0.335333      13.325470       0.000000       0.256510       0.122000   -9999.000000       0.077800       0.285000
56792     56792     guizhou        104.9631       25.7892          137       140     2012      04        10        101              0.331000      18.564240       0.000000       0.249003       0.116000       0.092100       0.064700       0.281000
56792     56792     guizhou        104.9631       25.7892          137       140     2012      04        11        102              0.318786      20.489410       1.332874       0.238451   -9999.000000   -9999.000000   -9999.000000       0.171000
56792     56792     guizhou        104.9631       25.7892          137       140     2012      04        12        103              0.312542      21.319244       1.278656       0.231775   -9999.000000   -9999.000000   -9999.000000       0.302000
56792     56792     guizhou        104.9631       25.7892          137       140     2012      04        13        104              0.306500      21.223419       0.000000       0.227386       0.120500       0.085300   -9999.000000   -9999.000000
56792     56792     guizhou        104.9631       25.7892          137       140     2012      04        14        105              0.304708      15.466919       0.000000       0.231977       0.104500   -9999.000000       0.073300       0.242000
56792     56792     guizhou        104.9631       25.7892          137       140     2012      04        15        106              0.300750      21.743225       0.000000       0.224719       0.105000       0.077100       0.073100   -9999.000000
56792     56792     guizhou        104.9631       25.7892          137       140     2012      04        16        107              0.298130      21.868164       0.000000       0.220268   -9999.000000       0.168500       0.075500       0.153000
56792     56792     guizhou        104.9631       25.7892          137       140     2012      04        17        108              0.297792      18.060242       0.000000       0.223720   -9999.000000   -9999.000000   -9999.000000       0.208000
56792     56792     guizhou        104.9631       25.7892          137       140     2012      04        18        109              0.295818      22.533203       0.000000       0.216118       0.117000       0.034700   -9999.000000   -9999.000000
56792     56792     guizhou        104.9631       25.7892          137       140     2012      04        19        110              0.307250      20.322418       0.377390       0.216568       0.112500   -9999.000000       0.087200       0.294000
56792     56792     guizhou        104.9631       25.7892          137       140     2012      04        20        111              0.316542      19.953186       1.766686       0.219426       0.110500   -9999.000000       0.084400   -9999.000000
56792     56792     guizhou        104.9631       25.7892          137       140     2012      04        21        112              0.316667      21.501343       7.072276       0.216687       0.086000       0.090500       0.095300       0.271000
56792     56792     guizhou        104.9631       25.7892          137       140     2012      04        22        113              0.313167      20.015259       1.002637       0.251833   -9999.000000   -9999.000000   -9999.000000       0.340000
56792     56792     guizhou        104.9631       25.7892          137       140     2012      04        23        114              0.303957      22.108002       0.000000       0.239906       0.099000       0.263500   -9999.000000       0.229000
56792     56792     guizhou        104.9631       25.7892          137       140     2012      04        24        115              0.301130      24.620026       0.000000       0.221221       0.099500       0.165700   -9999.000000       0.412000
56792     56792     guizhou        104.9631       25.7892          137       140     2012      04        25        116              0.000000      25.523163       0.745508       0.208822       0.110500   -9999.000000       0.097600   -9999.000000
56792     56792     guizhou        104.9631       25.7892          137       140     2012      04        26        117              0.314917      19.088837       0.434115       0.213359       0.100500       0.230700       0.103400       0.255000
56792     56792     guizhou        104.9631       25.7892          137       140     2012      04        27        118              0.318625      21.075958       0.000000       0.211118   -9999.000000   -9999.000000       0.080800   -9999.000000
56792     56792     guizhou        104.9631       25.7892          137       140     2012      04        28        119              0.321478      23.458923       0.394844       0.205937   -9999.000000       0.136500   -9999.000000       0.086000
56792     56792     guizhou        104.9631       25.7892          137       140     2012      04        29        120              0.322167      24.160156       0.000000       0.202443       0.093500       0.096400   -9999.000000       0.402000
56792     56792     guizhou        104.9631       25.7892          137       140     2012      04        30        121              0.325292      24.031647       0.000000       0.198167       0.091000   -9999.000000   -9999.000000   -9999.000000
56792     56792     guizhou        104.9631       25.7892          137       140     2012      05        01        122              0.328875      26.070465       0.000000       0.185595       0.120500       0.132100       0.104300       0.016000
56792     56792     guizhou        104.9631       25.7892          137       140     2012      05        02        123              0.329833      26.776093       0.000000       0.178802   -9999.000000   -9999.000000       0.107000   -9999.000000
56792     56792     guizhou        104.9631       25.7892          137       140     2012      05        03        124              0.332739      25.137238       0.000000       0.179421   -9999.000000       0.184100       0.089700       0.242000
56792     56792     guizhou        104.9631       25.7892          137       140     2012      05        04        125              0.338208      26.881989       0.154216       0.173622       0.133500       0.117000   -9999.000000       0.312000
56792     56792     guizhou        104.9631       25.7892          137       140     2012      05        05        126              0.337870      25.294128       0.368633       0.174535       0.120500   -9999.000000   -9999.000000       0.154000
56792     56792     guizhou        104.9631       25.7892          137       140     2012      05        06        127              0.343667      23.474091       6.682515       0.180422       0.150000       0.211800       0.114200       0.296000
56792     56792     guizhou        104.9631       25.7892          137       140     2012      05        07        128              0.361667      22.704681       0.000000       0.232466   -9999.000000       0.207500       0.115000   -9999.000000
56792     56792     guizhou        104.9631       25.7892          137       140     2012      05        08        129              0.400000      24.297455       4.870350       0.220267   -9999.000000   -9999.000000       0.130100       0.828000
56792     56792     guizhou        104.9631       25.7892          137       140     2012      05        09        130              0.435750      23.283875      31.960583       0.236046   -9999.000000       0.144600   -9999.000000       0.535000
56792     56792     guizhou        104.9631       25.7892          137       140     2012      05        10        131              0.000000      24.570496       8.635977       0.271390       0.146000   -9999.000000   -9999.000000       0.411000
56792     56792     guizhou        104.9631       25.7892          137       140     2012      05        11        132              0.000000      23.162354       0.000000       0.297179       0.134500       0.177400   -9999.000000       0.587000
56792     56792     guizhou        104.9631       25.7892          137       140     2012      05        12        133              0.000000      24.738892       2.905562       0.268109       0.126000       0.368300       0.122600   -9999.000000
56792     56792     guizhou        104.9631       25.7892          137       140     2012      05        13        134              0.000000      21.985962       1.729624       0.268573   -9999.000000   -9999.000000       0.129400       0.411000
56792     56792     guizhou        104.9631       25.7892          137       140     2012      05        14        135              0.000000      22.219513       0.279180       0.258862   -9999.000000       0.170100       0.083600   -9999.000000
56792     56792     guizhou        104.9631       25.7892          137       140     2012      05        15        136              0.000000      19.814178       0.000000       0.255051       0.148500   -9999.000000   -9999.000000       0.224000
56792     56792     guizhou        104.9631       25.7892          137       140     2012      05        16        137              0.000000      19.224182       2.760869       0.248971       0.162500       0.109400   -9999.000000       0.289000
56792     56792     guizhou        104.9631       25.7892          137       140     2012      05        17        138              0.000000      20.406158       0.606093       0.252507       0.161000       0.162900   -9999.000000   -9999.000000
56792     56792     guizhou        104.9631       25.7892          137       140     2012      05        18        139              0.000000      20.117950       7.646391       0.254155   -9999.000000   -9999.000000       0.097500       0.358000
56792     56792     guizhou        104.9631       25.7892          137       140     2012      05        19        140              0.000000      23.765472       1.264020       0.253765   -9999.000000       0.138600       0.095500   -9999.000000
56792     56792     guizhou        104.9631       25.7892          137       140     2012      05        20        141              0.000000      24.732269       3.214454       0.264447   -9999.000000   -9999.000000       0.088000       0.572000
56792     56792     guizhou        104.9631       25.7892          137       140     2012      05        21        142              0.495167      22.708221      90.477684       0.255543       0.096000       0.097400   -9999.000000       0.627000
56792     56792     guizhou        104.9631       25.7892          137       140     2012      05        22        143              0.505792      23.912415       6.407109       0.327504       0.143500       0.333000   -9999.000000       0.883000
56792     56792     guizhou        104.9631       25.7892          137       140     2012      05        23        144              0.503583      19.839081       1.432213       0.329767   -9999.000000   -9999.000000       0.075400       0.948000
56792     56792     guizhou        104.9631       25.7892          137       140     2012      05        24        145              0.499875      18.475403       1.527353       0.292729   -9999.000000       0.184200       0.076900   -9999.000000
56792     56792     guizhou        104.9631       25.7892          137       140     2012      05        25        146              0.000000      18.238403       7.079174       0.285742       0.146000   -9999.000000       0.068900       0.978000
56792     56792     guizhou        104.9631       25.7892          137       140     2012      05        26        147              0.500500      17.428253       0.735589       0.293391       0.124000   -9999.000000   -9999.000000   -9999.000000
56792     56792     guizhou        104.9631       25.7892          137       140     2012      05        27        148              0.494083      20.820557       0.460772       0.280435       0.115500       0.119900   -9999.000000       0.608000
56792     56792     guizhou        104.9631       25.7892          137       140     2012      05        28        149              0.503000      21.600433      38.347321       0.273547       0.129000   -9999.000000   -9999.000000       1.000000
56792     56792     guizhou        104.9631       25.7892          137       140     2012      05        29        150              0.520708      21.949829      15.368422       0.311819   -9999.000000       0.147400       0.072200   -9999.000000
56792     56792     guizhou        104.9631       25.7892          137       140     2012      05        30        151              0.502652      19.299927       0.428186       0.318650       0.127000       0.174800       0.067100   -9999.000000
56792     56792     guizhou        104.9631       25.7892          137       140     2012      05        31        152              0.496217      20.227844       0.437363       0.291010       0.133500   -9999.000000       0.063300   -9999.000000
56792     56792     guizhou        104.9631       25.7892          137       140     2012      06        01        153              0.514875      19.894501      15.561584       0.283460       0.189000       0.189500   -9999.000000       0.967000
56792     56792     guizhou        104.9631       25.7892          137       140     2012      06        02        154              0.515625      17.556488       1.784202       0.299354       0.175000   -9999.000000   -9999.000000       0.943000
56792     56792     guizhou        104.9631       25.7892          137       140     2012      06        03        155              0.519522      18.327240      12.201045       0.297445   -9999.000000       0.279800   -9999.000000       0.726000
56792     56792     guizhou        104.9631       25.7892          137       140     2012      06        04        156              0.518625      20.007843       1.007827       0.298987   -9999.000000       0.255800       0.053400       0.985000
56792     56792     guizhou        104.9631       25.7892          137       140     2012      06        05        157              0.514333      18.671173       2.428605       0.296053       0.154500   -9999.000000       0.050500   -9999.000000
56792     56792     guizhou        104.9631       25.7892          137       140     2012      06        06        158              0.518708      21.938904      21.107540       0.284103       0.129000       0.398200       0.033600       1.000000
56792     56792     guizhou        104.9631       25.7892          137       140     2012      06        07        159              0.526917      23.615479       1.656075       0.309215       0.159500   -9999.000000   -9999.000000       0.912000
56792     56792     guizhou        104.9631       25.7892          137       140     2012      06        08        160              0.523750      20.690552       2.100576       0.299007   -9999.000000       0.027600   -9999.000000       0.754000
56792     56792     guizhou        104.9631       25.7892          137       140     2012      06        09        161              0.520833      21.919373      10.222198       0.290157   -9999.000000       0.276600       0.044900       0.952000
56792     56792     guizhou        104.9631       25.7892          137       140     2012      06        10        162              0.540348      23.506744      23.860853       0.304143       0.164000   -9999.000000       0.053200   -9999.000000
56792     56792     guizhou        104.9631       25.7892          137       140     2012      06        11        163              0.000000      23.339050       5.075822       0.317130       0.173500       0.261800       0.041000       0.929000
56792     56792     guizhou        104.9631       25.7892          137       140     2012      06        12        164              0.534292      21.503387       3.829006       0.303405       0.166000   -9999.000000   -9999.000000   -9999.000000
56792     56792     guizhou        104.9631       25.7892          137       140     2012      06        13        165              0.548292      20.448364      42.582291       0.297815   -9999.000000   -9999.000000   -9999.000000       0.829000
56792     56792     guizhou        104.9631       25.7892          137       140     2012      06        14        166              0.536250      21.890594       0.771276       0.317747   -9999.000000       0.167500   -9999.000000       0.883000
56792     56792     guizhou        104.9631       25.7892          137       140     2012      06        15        167              0.515833      22.259979       0.216571       0.314629       0.142000   -9999.000000       0.039400   -9999.000000
56792     56792     guizhou        104.9631       25.7892          137       140     2012      06        16        168              0.502042      21.524231       0.000000       0.299947       0.148000       0.229700       0.038600       0.648000
56792     56792     guizhou        104.9631       25.7892          137       140     2012      06        17        169              0.482833      21.115326       3.633131       0.294230       0.144000       0.299400       0.034300   -9999.000000
56792     56792     guizhou        104.9631       25.7892          137       140     2012      06        18        170              0.357500      22.165436      31.548483       0.289552       0.136000   -9999.000000   -9999.000000       1.000000
56792     56792     guizhou        104.9631       25.7892          137       140     2012      06        19        171              0.386381      21.999969       4.351552       0.312482   -9999.000000       0.289100   -9999.000000       1.000000
56792     56792     guizhou        104.9631       25.7892          137       140     2012      06        20        172              0.363583      19.754028       0.000000       0.311382       0.150000   -9999.000000   -9999.000000       0.785000
56792     56792     guizhou        104.9631       25.7892          137       140     2012      06        21        173              0.370875      21.455597      29.187435       0.296811       0.143000       0.113600       0.099900       1.000000
56792     56792     guizhou        104.9631       25.7892          137       140     2012      06        22        174              0.383833      20.558136       2.684237       0.318286       0.158500       0.191200       0.092600   -9999.000000
56792     56792     guizhou        104.9631       25.7892          137       140     2012      06        23        175              0.364875      20.603027      11.481338       0.312638       0.131000   -9999.000000       0.082600       0.544000
56792     56792     guizhou        104.9631       25.7892          137       140     2012      06        24        176              0.375958      23.721619       4.156300       0.298183   -9999.000000       0.197800   -9999.000000   -9999.000000
56792     56792     guizhou        104.9631       25.7892          137       140     2012      06        25        177              0.375250      22.061340       0.224220       0.301778   -9999.000000   -9999.000000   -9999.000000       0.888000
56792     56792     guizhou        104.9631       25.7892          137       140     2012      06        26        178              0.388261      23.382111       8.142018       0.293724       0.153000       0.407700       0.052800       0.803000
56792     56792     guizhou        104.9631       25.7892          137       140     2012      06        27        179              0.394375      22.970825      11.105492       0.299763       0.140500       0.264800       0.055000   -9999.000000
56792     56792     guizhou        104.9631       25.7892          137       140     2012      06        28        180              0.400917      22.351746      29.095341       0.306692       0.140000   -9999.000000       0.042900       0.992000
56792     56792     guizhou        104.9631       25.7892          137       140     2012      06        29        181              0.379167      21.870270      15.993520       0.328136   -9999.000000       0.228000   -9999.000000   -9999.000000
56792     56792     guizhou        104.9631       25.7892          137       140     2012      06        30        182              0.364417      24.049835       3.464071       0.318042   -9999.000000   -9999.000000   -9999.000000   -9999.000000
56792     56792     guizhou        104.9631       25.7892          137       140     2012      07        01        183              0.389875      24.598938      13.489218       0.310013       0.146500   -9999.000000   -9999.000000       1.000000
56792     56792     guizhou        104.9631       25.7892          137       140     2012      07        02        184              0.377375      22.555542       0.227989       0.317993       0.128500       0.165600       0.041100       0.588000
56792     56792     guizhou        104.9631       25.7892          137       140     2012      07        03        185              0.360667      23.457764       0.319833       0.302310       0.126000   -9999.000000       0.038000       0.728000
56792     56792     guizhou        104.9631       25.7892          137       140     2012      07        04        186              0.326458      24.043610       9.464955       0.296919   -9999.000000       0.349300       0.033300   -9999.000000
56792     56792     guizhou        104.9631       25.7892          137       140     2012      07        05        187              0.326625      23.554230       4.023198       0.304611   -9999.000000       0.055400   -9999.000000       0.967000
56792     56792     guizhou        104.9631       25.7892          137       140     2012      07        06        188              0.309625      23.690521       0.000000       0.300100   -9999.000000   -9999.000000   -9999.000000   -9999.000000
56792     56792     guizhou        104.9631       25.7892          137       140     2012      07        07        189              0.290958      25.235687       4.760849       0.288918   -9999.000000       0.175400       0.036500       0.594000
56792     56792     guizhou        104.9631       25.7892          137       140     2012      07        08        190              0.271292      25.329712       1.231733       0.285837       0.117500   -9999.000000       0.038800       0.614000
56792     56792     guizhou        104.9631       25.7892          137       140     2012      07        09        191              0.262833      25.387360       1.289664       0.281888       0.109000       0.145000       0.058400   -9999.000000
56792     56792     guizhou        104.9631       25.7892          137       140     2012      07        10        192              0.297708      25.834808       6.754797       0.278952   -9999.000000       0.100900   -9999.000000       0.862000
56792     56792     guizhou        104.9631       25.7892          137       140     2012      07        11        193              0.309167      25.850311       5.642032       0.287998   -9999.000000   -9999.000000   -9999.000000   -9999.000000
56792     56792     guizhou        104.9631       25.7892          137       140     2012      07        12        194              0.349500      25.233948      53.025166       0.291972       0.182000       0.201700   -9999.000000       0.764000
56792     56792     guizhou        104.9631       25.7892          137       140     2012      07        13        195              0.376208      24.209076      58.131279       0.322234       0.212000   -9999.000000       0.062000       1.000000
56792     56792     guizhou        104.9631       25.7892          137       140     2012      07        14        196              0.370792      21.525085       2.702244       0.453057       0.198000       0.151000       0.063200   -9999.000000
56792     56792     guizhou        104.9631       25.7892          137       140     2012      07        15        197              0.357958      23.397247       1.373891       0.355021   -9999.000000       0.191900       0.051900       0.783000
56792     56792     guizhou        104.9631       25.7892          137       140     2012      07        16        198              0.355333      23.983734      23.370726       0.316341   -9999.000000   -9999.000000   -9999.000000   -9999.000000
56792     56792     guizhou        104.9631       25.7892          137       140     2012      07        17        199              0.513609      23.279785      12.705976       0.324519       0.238000       0.171100   -9999.000000       1.000000
56792     56792     guizhou        104.9631       25.7892          137       140     2012      07        18        200              0.520333      21.936127      24.897926       0.322150       0.213000   -9999.000000   -9999.000000       1.000000
56792     56792     guizhou        104.9631       25.7892          137       140     2012      07        19        201              0.512500      22.203918       5.351515       0.331485       0.195500       0.168200       0.043700       0.794000
56792     56792     guizhou        104.9631       25.7892          137       140     2012      07        20        202              0.508667      23.094635       6.758292       0.322207       0.177000       0.241800       0.041200       0.977000
56792     56792     guizhou        104.9631       25.7892          137       140     2012      07        21        203              0.500000      24.277222       0.153660       0.314659   -9999.000000   -9999.000000       0.034400   -9999.000000
56792     56792     guizhou        104.9631       25.7892          137       140     2012      07        22        204              0.494458      25.403107       7.257833       0.300921       0.275000       0.231800   -9999.000000       0.842000
56792     56792     guizhou        104.9631       25.7892          137       140     2012      07        23        205              0.510125      22.604156       2.771775       0.305944       0.243000       0.100500   -9999.000000   -9999.000000
56792     56792     guizhou        104.9631       25.7892          137       140     2012      07        24        206              0.507792      22.905212       8.952355       0.301717       0.273500   -9999.000000       0.058100       0.893000
56792     56792     guizhou        104.9631       25.7892          137       140     2012      07        25        207              0.514625      21.951630      27.099749       0.302145       0.284500       0.346600       0.057800       1.000000
56792     56792     guizhou        104.9631       25.7892          137       140     2012      07        26        208              0.511208      21.313385       3.609623       0.326851   -9999.000000   -9999.000000       0.054700   -9999.000000
56792     56792     guizhou        104.9631       25.7892          137       140     2012      07        27        209              0.506417      22.967499       6.649055       0.307625   -9999.000000       0.073600   -9999.000000       0.803000
56792     56792     guizhou        104.9631       25.7892          137       140     2012      07        28        210              0.513667      23.482147      19.268347       0.304695       0.260000       0.239200   -9999.000000   -9999.000000
56792     56792     guizhou        104.9631       25.7892          137       140     2012      07        29        211              0.511792      22.134491       4.770960       0.321754       0.245000   -9999.000000   -9999.000000       0.802000
56792     56792     guizhou        104.9631       25.7892          137       140     2012      07        30        212              0.504042      22.605194       1.360630       0.309966       0.237500       0.201100       0.088100       0.855000
56792     56792     guizhou        104.9631       25.7892          137       140     2012      07        31        213              0.486917      24.347321       2.030695       0.299923   -9999.000000   -9999.000000       0.091800       0.532000
56792     56792     guizhou        104.9631       25.7892          137       140     2012      08        01        214              0.486875      24.733521      34.142929       0.297531   -9999.000000       0.144700       0.077600       0.746000
56792     56792     guizhou        104.9631       25.7892          137       140     2012      08        02        215              0.507000      23.764587       0.504079       0.318463       0.310000       0.283900   -9999.000000   -9999.000000
56792     56792     guizhou        104.9631       25.7892          137       140     2012      08        03        216              0.493750      23.588257       0.000000       0.306678       0.280000   -9999.000000   -9999.000000       0.662000
56792     56792     guizhou        104.9631       25.7892          137       140     2012      08        04        217              0.478625      24.241302       0.000000       0.296272       0.295500       0.241600   -9999.000000   -9999.000000
56792     56792     guizhou        104.9631       25.7892          137       140     2012      08        05        218              0.488417      24.928070       7.747374       0.290434       0.257000   -9999.000000       0.091200       0.529000
56792     56792     guizhou        104.9631       25.7892          137       140     2012      08        06        219              0.511542      25.487701      15.324100       0.296597   -9999.000000       0.274800       0.137000       0.675000
56792     56792     guizhou        104.9631       25.7892          137       140     2012      08        07        220              0.510583      22.782654       3.602771       0.309975   -9999.000000       0.356700       0.113500   -9999.000000
56792     56792     guizhou        104.9631       25.7892          137       140     2012      08        08        221              0.500875      21.992981       2.459114       0.302101       0.279500   -9999.000000   -9999.000000       0.641000
56792     56792     guizhou        104.9631       25.7892          137       140     2012      08        09        222              0.506042      23.756836       3.414147       0.291811       0.284500       0.355300   -9999.000000   -9999.000000
56792     56792     guizhou        104.9631       25.7892          137       140     2012      08        10        223              0.485542      24.064331       0.000000       0.291136       0.267000       0.131000       0.124200       0.606000
56792     56792     guizhou        104.9631       25.7892          137       140     2012      08        11        224              0.455583      24.404083       0.000000       0.281036   -9999.000000   -9999.000000       0.128700       0.514000
56792     56792     guizhou        104.9631       25.7892          137       140     2012      08        12        225              0.405917      25.476593       0.000000       0.276693   -9999.000000       0.264700       0.112000   -9999.000000
56792     56792     guizhou        104.9631       25.7892          137       140     2012      08        13        226              0.353750      25.964233       1.399572       0.273802       0.192000   -9999.000000   -9999.000000       0.576000
56792     56792     guizhou        104.9631       25.7892          137       140     2012      08        14        227              0.323333      25.714111       0.668831       0.272346       0.194500       0.295900   -9999.000000   -9999.000000
56792     56792     guizhou        104.9631       25.7892          137       140     2012      08        15        228              0.300417      25.611694      11.178885       0.272481       0.194000       0.208100   -9999.000000       0.600000
56792     56792     guizhou        104.9631       25.7892          137       140     2012      08        16        229              0.283333      24.854431       0.000000       0.290816       0.177000   -9999.000000       0.092100       0.519000
56792     56792     guizhou        104.9631       25.7892          137       140     2012      08        17        230              0.275875      25.290405       1.032532       0.282177   -9999.000000       0.051200       0.096700       0.478000
56792     56792     guizhou        104.9631       25.7892          137       140     2012      08        18        231              0.391375      25.845581      24.357365       0.273703   -9999.000000   -9999.000000       0.087600       1.000000
56792     56792     guizhou        104.9631       25.7892          137       140     2012      08        19        232              0.401250      21.579803       4.864778       0.316563       0.204500       0.164200   -9999.000000   -9999.000000
56792     56792     guizhou        104.9631       25.7892          137       140     2012      08        20        233              0.398000      23.366852      35.176552       0.298454       0.182000       0.300200   -9999.000000       0.485000
56792     56792     guizhou        104.9631       25.7892          137       140     2012      08        21        234              0.413208      24.191315       1.979262       0.308620       0.217500   -9999.000000   -9999.000000   -9999.000000
56792     56792     guizhou        104.9631       25.7892          137       140     2012      08        22        235              0.390042      22.491028       4.292551       0.306272   -9999.000000       0.438500       0.077900   -9999.000000
56792     56792     guizhou        104.9631       25.7892          137       140     2012      08        23        236              0.371083      22.368896       0.000000       0.290361   -9999.000000   -9999.000000       0.073900       0.609000
56792     56792     guizhou        104.9631       25.7892          137       140     2012      08        24        237              0.348917      20.730743       0.000000       0.286791       0.235000       0.286200       0.066400   -9999.000000
56792     56792     guizhou        104.9631       25.7892          137       140     2012      08        25        238              0.000000      22.387482       0.000000       0.282017       0.232000       0.283800   -9999.000000       0.303000
56792     56792     guizhou        104.9631       25.7892          137       140     2012      08        26        239              0.313750      22.698425      12.188465       0.279879       0.222000   -9999.000000   -9999.000000   -9999.000000
56792     56792     guizhou        104.9631       25.7892          137       140     2012      08        27        240              0.292750      22.703766       0.000000       0.278458   -9999.000000       0.200200       0.059500       0.532000
56792     56792     guizhou        104.9631       25.7892          137       140     2012      08        28        241              0.275917      23.069672       0.709993       0.276846   -9999.000000       0.059600       0.054300       0.636000
56792     56792     guizhou        104.9631       25.7892          137       140     2012      08        29        242              0.269250      24.066101      13.625848       0.276433       0.255000   -9999.000000       0.035400       0.658000
56792     56792     guizhou        104.9631       25.7892          137       140     2012      08        30        243              0.258125      23.784790       4.085766       0.301343       0.221000       0.128800   -9999.000000       0.686000
56792     56792     guizhou        104.9631       25.7892          137       140     2012      08        31        244              0.255667      25.003082       8.334074       0.289761       0.237000   -9999.000000   -9999.000000   -9999.000000
56792     56792     guizhou        104.9631       25.7892          137       140     2012      09        01        245              0.263250      23.696747      10.665891       0.295968       0.202000       0.106800   -9999.000000       0.678000
56792     56792     guizhou        104.9631       25.7892          137       140     2012      09        02        246              0.266167      23.147583       1.113044       0.296954   -9999.000000       0.200900       0.061300       0.709000
56792     56792     guizhou        104.9631       25.7892          137       140     2012      09        03        247              0.264208      20.897614       0.000000       0.295308   -9999.000000   -9999.000000       0.098900       0.415000
56792     56792     guizhou        104.9631       25.7892          137       140     2012      09        04        248              0.251333      21.760712       0.000000       0.280614       0.216000       0.213400       0.083800       0.547000
56792     56792     guizhou        104.9631       25.7892          137       140     2012      09        05        249              0.236625      20.850189       0.000000       0.276387       0.200000   -9999.000000   -9999.000000   -9999.000000
56792     56792     guizhou        104.9631       25.7892          137       140     2012      09        06        250              0.226958      21.831116       0.000000       0.273068       0.210000       0.078000   -9999.000000       0.515000
56792     56792     guizhou        104.9631       25.7892          137       140     2012      09        07        251              0.217792      23.195221       0.311353       0.270677   -9999.000000       0.190600       0.094000   -9999.000000
56792     56792     guizhou        104.9631       25.7892          137       140     2012      09        08        252              0.210708      23.137024       0.000000       0.270177   -9999.000000   -9999.000000       0.095500       0.473000
56792     56792     guizhou        104.9631       25.7892          137       140     2012      09        09        253              0.202375      24.243713       2.625306       0.268255       0.213000       0.107100       0.095500       0.550000
56792     56792     guizhou        104.9631       25.7892          137       140     2012      09        10        254              0.195542      24.088440       1.318656       0.273365       0.209000   -9999.000000   -9999.000000   -9999.000000
56792     56792     guizhou        104.9631       25.7892          137       140     2012      09        11        255              0.219125      23.615204      31.291790       0.272201       0.133000   -9999.000000   -9999.000000       0.850000
56792     56792     guizhou        104.9631       25.7892          137       140     2012      09        12        256              0.340375      22.738922       7.065319       0.298253       0.163000       0.071200   -9999.000000   -9999.000000
56792     56792     guizhou        104.9631       25.7892          137       140     2012      09        13        257              0.353542      18.759857       5.224661       0.309078   -9999.000000   -9999.000000       0.047200       0.623000
56792     56792     guizhou        104.9631       25.7892          137       140     2012      09        14        258              0.337125      17.104492       0.000000       0.301276   -9999.000000       0.138000       0.046100       0.434000
56792     56792     guizhou        104.9631       25.7892          137       140     2012      09        15        259              0.328917      18.177155       0.071476       0.284583       0.135500       0.058600       0.040500       0.550000
56792     56792     guizhou        104.9631       25.7892          137       140     2012      09        16        260              0.329292      18.461182       3.918145       0.279953       0.150000   -9999.000000   -9999.000000       0.627000
56792     56792     guizhou        104.9631       25.7892          137       140     2012      09        17        261              0.352417      18.205627       0.688869       0.285015       0.162500       0.235000   -9999.000000   -9999.000000
56792     56792     guizhou        104.9631       25.7892          137       140     2012      09        18        262              0.358375      17.057709      14.083425       0.285143   -9999.000000   -9999.000000   -9999.000000       0.720000
56792     56792     guizhou        104.9631       25.7892          137       140     2012      09        19        263              0.362333      16.002655       4.602636       0.296546   -9999.000000       0.094600       0.040900   -9999.000000
56792     56792     guizhou        104.9631       25.7892          137       140     2012      09        20        264              0.348750      16.206299       0.231591       0.303028       0.161500       0.066500       0.046500       0.570000
56792     56792     guizhou        104.9631       25.7892          137       140     2012      09        21        265              0.359167      17.407928       2.393040       0.287453   -9999.000000   -9999.000000       0.035400       0.929000
56792     56792     guizhou        104.9631       25.7892          137       140     2012      09        22        266              0.355833      17.052460       0.408555       0.289463       0.166000       0.300500   -9999.000000   -9999.000000
56792     56792     guizhou        104.9631       25.7892          137       140     2012      09        23        267              0.355250      17.722565       0.198894       0.284187       0.169000   -9999.000000   -9999.000000       0.719000
56792     56792     guizhou        104.9631       25.7892          137       140     2012      09        24        268              0.366958      17.828918       2.495513       0.282851   -9999.000000       0.149000       0.045400   -9999.000000
56792     56792     guizhou        104.9631       25.7892          137       140     2012      09        25        269              0.362417      17.769348       2.117953       0.287168       0.172000       0.198400       0.048900       0.743000
56792     56792     guizhou        104.9631       25.7892          137       140     2012      09        26        270              0.371917      19.537537       3.236924       0.284714       0.159000   -9999.000000       0.048100       0.971000
56792     56792     guizhou        104.9631       25.7892          137       140     2012      09        27        271              0.367214      18.963287       3.765920       0.289143       0.178500       0.238400   -9999.000000       0.590000
56792     56792     guizhou        104.9631       25.7892          137       140     2012      09        28        272              0.367267      18.458008       0.167946       0.288482       0.163500   -9999.000000   -9999.000000       0.756000
56792     56792     guizhou        104.9631       25.7892          137       140     2012      09        29        273              0.362708      17.676788       0.000000       0.286333   -9999.000000       0.188100   -9999.000000   -9999.000000
56792     56792     guizhou        104.9631       25.7892          137       140     2012      09        30        274              0.356208      19.030457       2.080053       0.278060   -9999.000000       0.302000       0.040500       0.786000
56792     56792     guizhou        104.9631       25.7892          137       140     2012      10        01        275              0.359375      17.017395       0.826343       0.282247       0.106000   -9999.000000       0.030400       0.585000
56792     56792     guizhou        104.9631       25.7892          137       140     2012      10        02        276              0.353250      17.978088       1.379219       0.279167       0.104000       0.159400       0.025400       0.563000
56792     56792     guizhou        104.9631       25.7892          137       140     2012      10        03        277              0.376208      18.996063       2.731549       0.278451       0.109000       0.187300   -9999.000000       0.799000
56792     56792     guizhou        104.9631       25.7892          137       140     2012      10        04        278              0.382000      16.817291      13.127488       0.286540   -9999.000000   -9999.000000   -9999.000000   -9999.000000
56792     56792     guizhou        104.9631       25.7892          137       140     2012      10        05        279              0.394458      16.611450       8.896472       0.296196   -9999.000000       0.122700   -9999.000000       0.829000
56792     56792     guizhou        104.9631       25.7892          137       140     2012      10        06        280              0.382708      15.952942       0.306235       0.306072       0.104000   -9999.000000       0.034500   -9999.000000
56792     56792     guizhou        104.9631       25.7892          137       140     2012      10        07        281              0.375667      15.933502       0.000000       0.291438       0.109000       0.129800       0.032900       0.637000
56792     56792     guizhou        104.9631       25.7892          137       140     2012      10        08        282              0.374417      17.571228       7.265901       0.283864       0.112500       0.157200       0.026000       0.565000
56792     56792     guizhou        104.9631       25.7892          137       140     2012      10        09        283              0.393292      18.803040       2.979249       0.287543       0.120000   -9999.000000   -9999.000000   -9999.000000
56792     56792     guizhou        104.9631       25.7892          137       140     2012      10        10        284              0.383125      15.926208       0.521050       0.296158   -9999.000000       0.228800   -9999.000000       0.617000
56792     56792     guizhou        104.9631       25.7892          137       140     2012      10        11        285              0.379500      15.478363       0.389266       0.285906   -9999.000000   -9999.000000       0.030200   -9999.000000
56792     56792     guizhou        104.9631       25.7892          137       140     2012      10        12        286              0.379333      17.538605       6.512658       0.281964       0.163500       0.133900       0.036800   -9999.000000
56792     56792     guizhou        104.9631       25.7892          137       140     2012      10        13        287              0.394417      19.093384       1.083400       0.288633       0.161000       0.162800       0.026200       0.690000
56792     56792     guizhou        104.9631       25.7892          137       140     2012      10        14        288              0.382542      16.096558       0.000000       0.290291       0.144000   -9999.000000   -9999.000000       0.603000
56792     56792     guizhou        104.9631       25.7892          137       140     2012      10        15        289              0.367667      18.759064       0.000000       0.281589   -9999.000000       0.253700   -9999.000000       0.739000
56792     56792     guizhou        104.9631       25.7892          137       140     2012      10        16        290              0.350750      21.024536       0.000000       0.276621   -9999.000000   -9999.000000   -9999.000000   -9999.000000
56792     56792     guizhou        104.9631       25.7892          137       140     2012      10        17        291              0.326375      19.629517       0.000000       0.274208       0.159000       0.137400       0.052500       0.244000
56792     56792     guizhou        104.9631       25.7892          137       140     2012      10        18        292              0.329042      16.478149       0.000000       0.273244       0.142000       0.155100       0.050500   -9999.000000
56792     56792     guizhou        104.9631       25.7892          137       140     2012      10        19        293              0.314917      18.915894       0.000000       0.270985       0.139500   -9999.000000       0.046100       0.444000
56792     56792     guizhou        104.9631       25.7892          137       140     2012      10        20        294              0.295917      19.859344       0.000000       0.269987       0.140000       0.039000   -9999.000000       0.617000
56792     56792     guizhou        104.9631       25.7892          137       140     2012      10        21        295              0.274375      20.528259       0.000000       0.267900   -9999.000000       0.169300   -9999.000000   -9999.000000
56792     56792     guizhou        104.9631       25.7892          137       140     2012      10        22        296              0.264667      20.837677       0.475650       0.265614   -9999.000000   -9999.000000   -9999.000000       0.290000
56792     56792     guizhou        104.9631       25.7892          137       140     2012      10        23        297              0.255792      18.963531       0.000000       0.266452   -9999.000000       0.025900       0.053500   -9999.000000
56792     56792     guizhou        104.9631       25.7892          137       140     2012      10        24        298              0.248125      19.164398       0.000000       0.264712   -9999.000000   -9999.000000       0.055400       0.387000
56792     56792     guizhou        104.9631       25.7892          137       140     2012      10        25        299              0.000000      17.746338       0.000000       0.264456       0.109500       0.103800       0.046500       0.529000
56792     56792     guizhou        104.9631       25.7892          137       140     2012      10        26        300              0.230417      19.689697       7.007627       0.261807   -9999.000000       0.083400   -9999.000000       0.239000
56792     56792     guizhou        104.9631       25.7892          137       140     2012      10        27        301              0.228250      20.140594       1.580624       0.259479   -9999.000000   -9999.000000   -9999.000000       0.336000
56792     56792     guizhou        104.9631       25.7892          137       140     2012      10        28        302              0.000000      18.205383       0.500789       0.260567       0.125500       0.213100       0.049900   -9999.000000
56792     56792     guizhou        104.9631       25.7892          137       140     2012      10        29        303              0.235500      18.961090      17.028732       0.261180       0.119000   -9999.000000       0.101800       0.799000
56792     56792     guizhou        104.9631       25.7892          137       140     2012      10        30        304              0.265000      19.008820       0.491176       0.286945       0.123500       0.270300       0.088300       0.505000
56792     56792     guizhou        104.9631       25.7892          137       140     2012      10        31        305              0.264625      13.885986       0.000000       0.286241   -9999.000000       0.098500   -9999.000000       0.178000
56792     56792     guizhou        104.9631       25.7892          137       140     2012      11        01        306              0.255667      15.135925       0.000000       0.272442   -9999.000000   -9999.000000   -9999.000000       0.368000
56792     56792     guizhou        104.9631       25.7892          137       140     2012      11        02        307              0.247125      15.575317       0.000000       0.267917       0.161000       0.217200   -9999.000000   -9999.000000
56792     56792     guizhou        104.9631       25.7892          137       140     2012      11        03        308              0.240250      16.463470       0.962191       0.264772       0.162500   -9999.000000       0.099700       0.366000
56792     56792     guizhou        104.9631       25.7892          137       140     2012      11        04        309              0.236417      16.172394       1.026391       0.263270       0.161500       0.192200       0.095900   -9999.000000
56792     56792     guizhou        104.9631       25.7892          137       140     2012      11        05        310              0.243458      14.648590       5.608791       0.265708       0.158000       0.121800       0.113600       0.610000
56792     56792     guizhou        104.9631       25.7892          137       140     2012      11        06        311              0.268542      14.966522       0.835714       0.276496   -9999.000000   -9999.000000   -9999.000000       0.568000
56792     56792     guizhou        104.9631       25.7892          137       140     2012      11        07        312              0.280000      12.776093       0.714503       0.277369   -9999.000000       0.187700   -9999.000000   -9999.000000
56792     56792     guizhou        104.9631       25.7892          137       140     2012      11        08        313              0.289043      12.386261       0.845329       0.273148       0.165000       0.399200       0.120300       0.625000
56792     56792     guizhou        104.9631       25.7892          137       140     2012      11        09        314              0.286667      12.218201       0.042471       0.270109       0.156000   -9999.000000       0.120600   -9999.000000
56792     56792     guizhou        104.9631       25.7892          137       140     2012      11        10        315              0.275708      16.256226       0.000000       0.262690       0.157500       0.162100       0.125200       0.173000
56792     56792     guizhou        104.9631       25.7892          137       140     2012      11        11        316              0.265625      15.434662       0.000000       0.260910   -9999.000000   -9999.000000   -9999.000000       0.286000
56792     56792     guizhou        104.9631       25.7892          137       140     2012      11        12        317              0.257583      12.362946       0.000000       0.261748   -9999.000000       0.195200   -9999.000000       0.261000
56792     56792     guizhou        104.9631       25.7892          137       140     2012      11        13        318              0.000000      14.788727       0.000000       0.260259       0.128000       0.065200   -9999.000000       0.411000
56792     56792     guizhou        104.9631       25.7892          137       140     2012      11        14        319              0.239292      15.071014       0.000000       0.259195       0.123000   -9999.000000       0.135900   -9999.000000
56792     56792     guizhou        104.9631       25.7892          137       140     2012      11        15        320              0.229792      17.176178       0.240603       0.255749       0.115500       0.331200       0.131100       0.257000
56792     56792     guizhou        104.9631       25.7892          137       140     2012      11        16        321              0.244667      18.827118      10.046804       0.254658   -9999.000000   -9999.000000       0.122500   -9999.000000
56792     56792     guizhou        104.9631       25.7892          137       140     2012      11        17        322              0.000000      12.100525       0.000000       0.287254   -9999.000000       0.239200   -9999.000000       0.338000
56792     56792     guizhou        104.9631       25.7892          137       140     2012      11        18        323              0.250667      13.685486       0.314415       0.268368       0.140000       0.148100   -9999.000000       0.408000
56792     56792     guizhou        104.9631       25.7892          137       140     2012      11        19        324              0.247000      15.317993      18.219528       0.264027       0.130500   -9999.000000   -9999.000000   -9999.000000
56792     56792     guizhou        104.9631       25.7892          137       140     2012      11        20        325              0.243000      13.079346       0.000000       0.264478       0.137500       0.311900       0.120400       0.178000
56792     56792     guizhou        104.9631       25.7892          137       140     2012      11        21        326              0.234417      16.791443       0.000000       0.259835       0.145000   -9999.000000       0.118700   -9999.000000
56792     56792     guizhou        104.9631       25.7892          137       140     2012      11        22        327              0.229333      16.207672       0.305221       0.257858   -9999.000000       0.093600       0.105500       0.250000
56792     56792     guizhou        104.9631       25.7892          137       140     2012      11        23        328              0.225833      14.447601       0.649799       0.257259   -9999.000000       0.041700   -9999.000000       0.219000
56792     56792     guizhou        104.9631       25.7892          137       140     2012      11        24        329              0.226833      10.352386       0.445940       0.260790       0.167500   -9999.000000   -9999.000000       0.136000
56792     56792     guizhou        104.9631       25.7892          137       140     2012      11        25        330              0.219542      13.364502       0.311339       0.258986       0.165500       0.255800       0.123600       0.415000
56792     56792     guizhou        104.9631       25.7892          137       140     2012      11        26        331              0.213833      14.261993       0.740363       0.254828       0.166500   -9999.000000   -9999.000000   -9999.000000
56792     56792     guizhou        104.9631       25.7892          137       140     2012      11        27        332              0.211500       9.262909       0.355096       0.255879   -9999.000000   -9999.000000       0.089700       0.180000
56792     56792     guizhou        104.9631       25.7892          137       140     2012      11        28        333              0.211000      10.444916       0.407588       0.257465   -9999.000000       0.252800   -9999.000000   -9999.000000
56792     56792     guizhou        104.9631       25.7892          137       140     2012      11        29        334              0.211333       8.178406       0.497299       0.260417       0.168000   -9999.000000   -9999.000000       0.105000
56792     56792     guizhou        104.9631       25.7892          137       140     2012      11        30        335              0.209875      11.576721       0.000000       0.258845       0.160000       0.214700   -9999.000000       0.303000
56792     56792     guizhou        104.9631       25.7892          137       140     2012      12        01        336              0.208000      12.300934       0.600520       0.257670       0.142000       0.079900       0.082900   -9999.000000
56792     56792     guizhou        104.9631       25.7892          137       140     2012      12        02        337              0.207667       8.072723       0.000000       0.261038       0.142000   -9999.000000       0.085100       0.144000
56792     56792     guizhou        104.9631       25.7892          137       140     2012      12        03        338              0.206000      11.013214       0.346600       0.258146   -9999.000000       0.148300       0.075100   -9999.000000
56792     56792     guizhou        104.9631       25.7892          137       140     2012      12        04        339              0.208042       8.102783       0.833778       0.260411   -9999.000000   -9999.000000   -9999.000000       0.316000
56792     56792     guizhou        104.9631       25.7892          137       140     2012      12        05        340              0.211000       7.750610       0.280696       0.263973       0.150000       0.153400   -9999.000000       0.190000
56792     56792     guizhou        104.9631       25.7892          137       140     2012      12        06        341              0.211042       8.154846       0.000000       0.261842       0.144000       0.190800   -9999.000000   -9999.000000
56792     56792     guizhou        104.9631       25.7892          137       140     2012      12        07        342              0.210875      10.628143       1.584523       0.259936       0.152500   -9999.000000       0.089400       0.172000
56792     56792     guizhou        104.9631       25.7892          137       140     2012      12        08        343              0.211500       9.644318       1.251435       0.263675   -9999.000000       0.280100       0.094500   -9999.000000
56792     56792     guizhou        104.9631       25.7892          137       140     2012      12        09        344              0.216250       8.535583       2.090296       0.268798   -9999.000000   -9999.000000       0.083700       0.419000
56792     56792     guizhou        104.9631       25.7892          137       140     2012      12        10        345              0.222625       8.199799       0.135385       0.272157       0.159000       0.277000   -9999.000000       0.425000
56792     56792     guizhou        104.9631       25.7892          137       140     2012      12        11        346              0.226583       7.308044       0.327866       0.268959       0.140000       0.106800   -9999.000000       0.372000
56792     56792     guizhou        104.9631       25.7892          137       140     2012      12        12        347              0.229625       7.526581       0.385350       0.267022       0.130000   -9999.000000       0.095400       0.385000
56792     56792     guizhou        104.9631       25.7892          137       140     2012      12        13        348              0.226083       8.614044       2.491953       0.265807       0.125000       0.114000       0.095500   -9999.000000
56792     56792     guizhou        104.9631       25.7892          137       140     2012      12        14        349              0.217208      12.796570       0.000000       0.260489   -9999.000000   -9999.000000       0.082900       0.096000
56792     56792     guizhou        104.9631       25.7892          137       140     2012      12        15        350              0.000000      13.855927       5.787508       0.255163       0.129000       0.292500   -9999.000000   -9999.000000
56792     56792     guizhou        104.9631       25.7892          137       140     2012      12        16        351              0.202917      13.291473       0.000000       0.252471       0.127000       0.320300   -9999.000000       0.157000
56792     56792     guizhou        104.9631       25.7892          137       140     2012      12        17        352              0.199667      12.820831       1.449802       0.252139       0.137500   -9999.000000   -9999.000000       0.147000
56792     56792     guizhou        104.9631       25.7892          137       140     2012      12        18        353              0.197417      10.721100       0.000000       0.253751       0.136500       0.060700       0.093900   -9999.000000
56792     56792     guizhou        104.9631       25.7892          137       140     2012      12        19        354              0.196167       9.225311       0.000000       0.254642   -9999.000000       0.065400       0.090800       0.167000
56792     56792     guizhou        104.9631       25.7892          137       140     2012      12        20        355              0.000000      11.989288       0.408079       0.253426   -9999.000000   -9999.000000       0.079800   -9999.000000
56792     56792     guizhou        104.9631       25.7892          137       140     2012      12        21        356              0.191417      12.352142       1.363767       0.251787       0.142000       0.167000   -9999.000000       0.137000
56792     56792     guizhou        104.9631       25.7892          137       140     2012      12        22        357              0.196167       6.223480       1.492531       0.257368       0.160000   -9999.000000   -9999.000000       0.187000
56792     56792     guizhou        104.9631       25.7892          137       140     2012      12        23        358              0.200458       4.428497       0.120763       0.264721   -9999.000000       0.145500       0.092300   -9999.000000
56792     56792     guizhou        104.9631       25.7892          137       140     2012      12        24        359              0.202636       4.067657       0.193286       0.262982   -9999.000000   -9999.000000       0.083100       0.099000
56792     56792     guizhou        104.9631       25.7892          137       140     2012      12        25        360              0.202375       8.764893       1.433810       0.259594   -9999.000000   -9999.000000       0.088100   -9999.000000
56792     56792     guizhou        104.9631       25.7892          137       140     2012      12        26        361              0.000000       6.829773       0.496605       0.263265       0.167000       0.235200   -9999.000000       0.210000
56792     56792     guizhou        104.9631       25.7892          137       140     2012      12        27        362              0.208900       5.045074       0.128063       0.264892       0.143000   -9999.000000   -9999.000000       0.316000
56792     56792     guizhou        104.9631       25.7892          137       140     2012      12        28        363              0.000000       6.358551       0.202946       0.262553       0.151000       0.191900   -9999.000000       0.158000
56792     56792     guizhou        104.9631       25.7892          137       140     2012      12        29        364              0.000000      10.488770       4.689290       0.259440       0.154000       0.256300       0.084300       0.037000
56792     56792     guizhou        104.9631       25.7892          137       140     2012      12        30        365              0.000000       3.284668       0.000000       0.248078   -9999.000000   -9999.000000       0.085400   -9999.000000
56792     56792     guizhou        104.9631       25.7892          137       140     2012      12        31        366              0.204400       1.354675       0.217229       0.228710   -9999.000000   -9999.000000       0.062400   -9999.000000
