# Supplementary material for: Research on Fusing Multisatellite Soil Moisture Data Based on Bayesian Model Averaging
Source: Hindawi journal article supplement (doi:10.1155/2018/9310838), 2018-06-25
Supplement: f1 [file 9310838.f1.zip › 2012_sm00-10cm_daily_ZDB_ZHY_56881_366days_allin.txt]

56881     56881     yunnan         103.1597       24.4497          142       133     2012      01        01        001              0.000000   -9999.000000       0.000000   -9999.000000       0.322000       0.121800   -9999.000000   -9999.000000
56881     56881     yunnan         103.1597       24.4497          142       133     2012      01        02        002              0.000000      11.683014       0.618244       0.253045   -9999.000000   -9999.000000   -9999.000000   -9999.000000
56881     56881     yunnan         103.1597       24.4497          142       133     2012      01        03        003              0.000000      15.080109       2.167460       0.252379   -9999.000000   -9999.000000       0.151800       0.034000
56881     56881     yunnan         103.1597       24.4497          142       133     2012      01        04        004              0.000000      13.953125      13.840602       0.258811       0.437000       0.056400       0.172000       0.593000
56881     56881     yunnan         103.1597       24.4497          142       133     2012      01        05        005              0.000000       7.401337       0.515363       0.301296       0.419500   -9999.000000       0.149700       0.222000
56881     56881     yunnan         103.1597       24.4497          142       133     2012      01        06        006              0.000000       9.386810       0.000000       0.282683       0.402500       0.069800   -9999.000000       0.384000
56881     56881     yunnan         103.1597       24.4497          142       133     2012      01        07        007              0.000000      11.307129       1.879691       0.273346   -9999.000000       0.063600   -9999.000000   -9999.000000
56881     56881     yunnan         103.1597       24.4497          142       133     2012      01        08        008              0.000000      11.884827       0.185929       0.268021   -9999.000000   -9999.000000       0.150500       0.092000
56881     56881     yunnan         103.1597       24.4497          142       133     2012      01        09        009              0.000000      12.159424       0.432526       0.264886       0.342500       0.117500       0.122500   -9999.000000
56881     56881     yunnan         103.1597       24.4497          142       133     2012      01        10        010              0.000000      13.233398       0.000000       0.261816       0.368500   -9999.000000       0.142500       0.017000
56881     56881     yunnan         103.1597       24.4497          142       133     2012      01        11        011              0.000000      13.473755       0.057417       0.260239       0.310500       0.093600   -9999.000000       0.025000
56881     56881     yunnan         103.1597       24.4497          142       133     2012      01        12        012              0.000000      11.954712       0.741031       0.260620   -9999.000000       0.090500   -9999.000000       0.070000
56881     56881     yunnan         103.1597       24.4497          142       133     2012      01        13        013              0.000000      13.053284       6.301389       0.260685   -9999.000000   -9999.000000   -9999.000000       0.077000
56881     56881     yunnan         103.1597       24.4497          142       133     2012      01        14        014              0.000000      11.914581       2.016160       0.274617       0.325500       0.168200       0.157400   -9999.000000
56881     56881     yunnan         103.1597       24.4497          142       133     2012      01        15        015              0.000000      12.239471       0.000000       0.283581       0.336000   -9999.000000       0.152900       0.061000
56881     56881     yunnan         103.1597       24.4497          142       133     2012      01        16        016              0.000000      11.702545       1.176888       0.269231       0.297500       0.106300       0.143600       0.234000
56881     56881     yunnan         103.1597       24.4497          142       133     2012      01        17        017              0.000000      11.522949      10.933789       0.263866   -9999.000000       0.168100   -9999.000000       0.066000
56881     56881     yunnan         103.1597       24.4497          142       133     2012      01        18        018              0.000000      11.656525       3.378451       0.260943   -9999.000000   -9999.000000   -9999.000000       0.051000
56881     56881     yunnan         103.1597       24.4497          142       133     2012      01        19        019              0.000000      12.223785       0.000000       0.257613       0.267000       0.112200   -9999.000000   -9999.000000
56881     56881     yunnan         103.1597       24.4497          142       133     2012      01        20        020              0.000000      12.579926       0.000000       0.254655       0.289500   -9999.000000       0.160200       0.034000
56881     56881     yunnan         103.1597       24.4497          142       133     2012      01        21        021              0.000000      12.875946       1.402005       0.252041       0.339000   -9999.000000       0.164200   -9999.000000
56881     56881     yunnan         103.1597       24.4497          142       133     2012      01        22        022              0.000000      12.813477       0.000000       0.249762       0.372000       0.135100       0.144100   -9999.000000
56881     56881     yunnan         103.1597       24.4497          142       133     2012      01        23        023              0.000000      12.681030       0.000000       0.247757   -9999.000000   -9999.000000   -9999.000000       0.012000
56881     56881     yunnan         103.1597       24.4497          142       133     2012      01        24        024              0.000000      12.026031      10.126992       0.247093   -9999.000000       0.053900   -9999.000000   -9999.000000
56881     56881     yunnan         103.1597       24.4497          142       133     2012      01        25        025              0.000000      11.930756       0.000000       0.244211       0.328500       0.025400       0.162800       0.012000
56881     56881     yunnan         103.1597       24.4497          142       133     2012      01        26        026              0.000000       8.097015       2.755483       0.247937       0.339500   -9999.000000       0.162700   -9999.000000
56881     56881     yunnan         103.1597       24.4497          142       133     2012      01        27        027              0.000000      12.542969       0.000000       0.245462       0.349000       0.075500       0.151100       0.069000
56881     56881     yunnan         103.1597       24.4497          142       133     2012      01        28        028              0.000000      13.866394       0.000000       0.241850   -9999.000000   -9999.000000   -9999.000000       0.109000
56881     56881     yunnan         103.1597       24.4497          142       133     2012      01        29        029              0.000000      14.165497       0.000000       0.239256   -9999.000000       0.027700   -9999.000000       0.061000
56881     56881     yunnan         103.1597       24.4497          142       133     2012      01        30        030              0.000000      14.357056      15.534372       0.237318       0.339500       0.064200   -9999.000000       0.089000
56881     56881     yunnan         103.1597       24.4497          142       133     2012      01        31        031              0.000000      14.834015       0.000000       0.235698       0.348000   -9999.000000       0.156500   -9999.000000
56881     56881     yunnan         103.1597       24.4497          142       133     2012      02        01        032              0.000000      14.781311       0.000000       0.234993       0.287500       0.053000       0.156700       0.029000
56881     56881     yunnan         103.1597       24.4497          142       133     2012      02        02        033              0.000000      15.015564       0.919374       0.232326   -9999.000000   -9999.000000       0.150600       0.009000
56881     56881     yunnan         103.1597       24.4497          142       133     2012      02        03        034              0.000000      14.960876       0.173866       0.230910   -9999.000000   -9999.000000   -9999.000000       0.039000
56881     56881     yunnan         103.1597       24.4497          142       133     2012      02        04        035              0.000000      14.965057       0.000000       0.230614       0.266000       0.109000   -9999.000000       0.126000
56881     56881     yunnan         103.1597       24.4497          142       133     2012      02        05        036              0.000000      15.376404       9.124869       0.227554       0.281000   -9999.000000   -9999.000000   -9999.000000
56881     56881     yunnan         103.1597       24.4497          142       133     2012      02        06        037              0.000000      15.867676       0.000000       0.223649       0.276000   -9999.000000       0.150500       0.093000
56881     56881     yunnan         103.1597       24.4497          142       133     2012      02        07        038              0.000000      15.661194       1.008357       0.219364   -9999.000000   -9999.000000       0.150500   -9999.000000
56881     56881     yunnan         103.1597       24.4497          142       133     2012      02        08        039              0.000000      13.941864       3.348304       0.222190   -9999.000000   -9999.000000       0.124700       0.036000
56881     56881     yunnan         103.1597       24.4497          142       133     2012      02        09        040              0.000000      15.523315       0.041677       0.222165       0.250000       0.044200   -9999.000000       0.113000
56881     56881     yunnan         103.1597       24.4497          142       133     2012      02        10        041              0.000000      16.338196       0.000000       0.218014       0.253000   -9999.000000   -9999.000000       0.023000
56881     56881     yunnan         103.1597       24.4497          142       133     2012      02        11        042              0.000000      16.617828       0.031766       0.215857       0.277000       0.051900       0.156300       0.070000
56881     56881     yunnan         103.1597       24.4497          142       133     2012      02        12        043              0.000000      16.604584       0.036071       0.215079   -9999.000000   -9999.000000       0.130700   -9999.000000
56881     56881     yunnan         103.1597       24.4497          142       133     2012      02        13        044              0.000000      16.855988       0.475054       0.212895   -9999.000000   -9999.000000       0.137300       0.074000
56881     56881     yunnan         103.1597       24.4497          142       133     2012      02        14        045              0.000000      16.950867       2.285985       0.211331   -9999.000000       0.031000   -9999.000000       0.119000
56881     56881     yunnan         103.1597       24.4497          142       133     2012      02        15        046              0.000000      17.023712       0.356465       0.208659       0.283500   -9999.000000   -9999.000000       0.061000
56881     56881     yunnan         103.1597       24.4497          142       133     2012      02        16        047              0.000000      17.312073       0.416306       0.205860       0.305500   -9999.000000   -9999.000000       0.089000
56881     56881     yunnan         103.1597       24.4497          142       133     2012      02        17        048              0.000000      17.754669       0.211579       0.203141       0.322500   -9999.000000       0.145200   -9999.000000
56881     56881     yunnan         103.1597       24.4497          142       133     2012      02        18        049              0.000000      18.135925      16.101387       0.201420   -9999.000000   -9999.000000       0.166700       0.040000
56881     56881     yunnan         103.1597       24.4497          142       133     2012      02        19        050              0.000000      15.052795       1.992797       0.203496   -9999.000000       0.088300       0.129900   -9999.000000
56881     56881     yunnan         103.1597       24.4497          142       133     2012      02        20        051              0.000000      14.984802       0.707350       0.207153       0.289500   -9999.000000   -9999.000000       0.027000
56881     56881     yunnan         103.1597       24.4497          142       133     2012      02        21        052              0.000000      17.101349       0.000000       0.205328       0.278500       0.206900   -9999.000000       0.064000
56881     56881     yunnan         103.1597       24.4497          142       133     2012      02        22        053              0.000000      17.653809      14.258812       0.203444       0.282000       0.197000   -9999.000000   -9999.000000
56881     56881     yunnan         103.1597       24.4497          142       133     2012      02        23        054              0.000000      17.919891       0.000000       0.200602   -9999.000000   -9999.000000       0.137700       0.247000
56881     56881     yunnan         103.1597       24.4497          142       133     2012      02        24        055              0.000000      18.451599       0.000000       0.197180   -9999.000000       0.118100       0.140200   -9999.000000
56881     56881     yunnan         103.1597       24.4497          142       133     2012      02        25        056              0.000000      18.908722       0.000000       0.192941       0.241000   -9999.000000   -9999.000000       0.124000
56881     56881     yunnan         103.1597       24.4497          142       133     2012      02        26        057              0.000000      19.352051       2.983718       0.186787       0.286000   -9999.000000   -9999.000000       0.052000
56881     56881     yunnan         103.1597       24.4497          142       133     2012      02        27        058              0.000000      18.933441       0.165782       0.181528       0.291500       0.082300   -9999.000000       0.057000
56881     56881     yunnan         103.1597       24.4497          142       133     2012      02        28        059              0.000000      14.843719       0.273360       0.187477       0.298000   -9999.000000   -9999.000000       0.121000
56881     56881     yunnan         103.1597       24.4497          142       133     2012      02        29        060              0.000000   -9999.000000       0.612174   -9999.000000   -9999.000000       0.141600   -9999.000000   -9999.000000
56881     56881     yunnan         103.1597       24.4497          142       133     2012      03        01        061              0.000000      18.126373       1.865399       0.189758   -9999.000000   -9999.000000       0.125100       0.046000
56881     56881     yunnan         103.1597       24.4497          142       133     2012      03        02        062              0.000000      16.806427       1.858259       0.205191       0.270500   -9999.000000   -9999.000000       0.070000
56881     56881     yunnan         103.1597       24.4497          142       133     2012      03        03        063              0.000000      15.983002      16.149731       0.213101       0.306000       0.248900   -9999.000000       0.424000
56881     56881     yunnan         103.1597       24.4497          142       133     2012      03        04        064              0.000000      15.227661       2.685162       0.260192       0.336500   -9999.000000   -9999.000000       0.612000
56881     56881     yunnan         103.1597       24.4497          142       133     2012      03        05        065              0.000000      13.252747       1.218785       0.280634   -9999.000000   -9999.000000       0.119200   -9999.000000
56881     56881     yunnan         103.1597       24.4497          142       133     2012      03        06        066              0.000000      15.834137       0.459780       0.257248   -9999.000000       0.044800       0.116800       0.128000
56881     56881     yunnan         103.1597       24.4497          142       133     2012      03        07        067              0.000000      16.334320      10.619330       0.247733       0.246500   -9999.000000       0.108500   -9999.000000
56881     56881     yunnan         103.1597       24.4497          142       133     2012      03        08        068              0.000000      17.271118       2.240412       0.240809       0.260000       0.083300   -9999.000000       0.150000
56881     56881     yunnan         103.1597       24.4497          142       133     2012      03        09        069              0.000000      17.972992       1.686179       0.233849       0.260500   -9999.000000   -9999.000000       0.039000
56881     56881     yunnan         103.1597       24.4497          142       133     2012      03        10        070              0.000000      18.541382       0.110184       0.227405   -9999.000000       0.091200   -9999.000000   -9999.000000
56881     56881     yunnan         103.1597       24.4497          142       133     2012      03        11        071              0.000000      18.333588       0.168400       0.224299   -9999.000000       0.117300       0.124700       0.039000
56881     56881     yunnan         103.1597       24.4497          142       133     2012      03        12        072              0.000000      19.550507       0.145381       0.220230       0.233000   -9999.000000       0.123400   -9999.000000
56881     56881     yunnan         103.1597       24.4497          142       133     2012      03        13        073              0.000000      20.036224       0.000000       0.215189       0.236500       0.173600   -9999.000000       0.005000
56881     56881     yunnan         103.1597       24.4497          142       133     2012      03        14        074              0.000000      20.199799       0.256790       0.210930       0.231000   -9999.000000   -9999.000000       0.054000
56881     56881     yunnan         103.1597       24.4497          142       133     2012      03        15        075              0.000000      20.347870       0.653408       0.205114   -9999.000000   -9999.000000   -9999.000000       0.005000
56881     56881     yunnan         103.1597       24.4497          142       133     2012      03        16        076              0.000000      20.885712       0.025703       0.199719   -9999.000000       0.216200       0.126200       0.004000
56881     56881     yunnan         103.1597       24.4497          142       133     2012      03        17        077              0.000000      20.837036       0.325156       0.194051       0.186000   -9999.000000       0.129100   -9999.000000
56881     56881     yunnan         103.1597       24.4497          142       133     2012      03        18        078              0.000000      19.412323       0.246785       0.192849       0.215500       0.193500       0.113900       0.050000
56881     56881     yunnan         103.1597       24.4497          142       133     2012      03        19        079              0.000000      20.023468       0.000000       0.189039       0.221000   -9999.000000   -9999.000000   -9999.000000
56881     56881     yunnan         103.1597       24.4497          142       133     2012      03        20        080              0.000000      20.224152       0.000000       0.184007       0.252000   -9999.000000   -9999.000000       0.065000
56881     56881     yunnan         103.1597       24.4497          142       133     2012      03        21        081              0.000000      21.879211       0.000000       0.179308   -9999.000000       0.039000   -9999.000000       0.012000
56881     56881     yunnan         103.1597       24.4497          142       133     2012      03        22        082              0.000000      22.356903       3.591119       0.175195   -9999.000000   -9999.000000       0.095000   -9999.000000
56881     56881     yunnan         103.1597       24.4497          142       133     2012      03        23        083              0.000000      21.909180       0.519502       0.174448       0.174000       0.009000       0.096200       0.002000
56881     56881     yunnan         103.1597       24.4497          142       133     2012      03        24        084              0.000000      16.093048       0.000000       0.182109       0.192000   -9999.000000       0.085300   -9999.000000
56881     56881     yunnan         103.1597       24.4497          142       133     2012      03        25        085              0.000000      17.241089       0.242133       0.183049       0.198500   -9999.000000   -9999.000000       0.019000
56881     56881     yunnan         103.1597       24.4497          142       133     2012      03        26        086              0.000000      19.020905       0.167149       0.186073   -9999.000000       0.042300   -9999.000000       0.025000
56881     56881     yunnan         103.1597       24.4497          142       133     2012      03        27        087              0.000000      19.417633       0.371915       0.187803   -9999.000000   -9999.000000   -9999.000000       0.103000
56881     56881     yunnan         103.1597       24.4497          142       133     2012      03        28        088              0.000000      20.803070       0.345710       0.187301       0.174500       0.060800       0.098100       0.144000
56881     56881     yunnan         103.1597       24.4497          142       133     2012      03        29        089              0.000000      22.600342       0.238221       0.184214       0.183000   -9999.000000       0.086500   -9999.000000
56881     56881     yunnan         103.1597       24.4497          142       133     2012      03        30        090              0.000000      23.271606       0.289832       0.175878       0.192500   -9999.000000   -9999.000000       0.101000
56881     56881     yunnan         103.1597       24.4497          142       133     2012      03        31        091              0.000000      22.016846       0.483697       0.168371   -9999.000000       0.071600   -9999.000000   -9999.000000
56881     56881     yunnan         103.1597       24.4497          142       133     2012      04        01        092              0.000000      16.178864       0.939491       0.173723   -9999.000000   -9999.000000   -9999.000000       0.080000
56881     56881     yunnan         103.1597       24.4497          142       133     2012      04        02        093              0.000000      21.475006       0.099709       0.173548       0.179000       0.046200       0.084100       0.147000
56881     56881     yunnan         103.1597       24.4497          142       133     2012      04        03        094              0.000000      23.693176       0.415864       0.167454       0.191500       0.063100       0.079400   -9999.000000
56881     56881     yunnan         103.1597       24.4497          142       133     2012      04        04        095              0.000000      22.084381       0.172879       0.166961       0.190000   -9999.000000       0.077900       0.061000
56881     56881     yunnan         103.1597       24.4497          142       133     2012      04        05        096              0.000000      23.455780       0.115802       0.164705   -9999.000000       0.045300   -9999.000000   -9999.000000
56881     56881     yunnan         103.1597       24.4497          142       133     2012      04        06        097              0.000000      23.794495       2.640081       0.162314   -9999.000000   -9999.000000   -9999.000000       0.143000
56881     56881     yunnan         103.1597       24.4497          142       133     2012      04        07        098              0.000000      23.444397      14.752342       0.168466       0.245000   -9999.000000   -9999.000000       0.237000
56881     56881     yunnan         103.1597       24.4497          142       133     2012      04        08        099              0.000000      18.580444       7.140622       0.260342       0.274500       0.171600       0.109900       0.831000
56881     56881     yunnan         103.1597       24.4497          142       133     2012      04        09        100              0.000000      15.658051       0.482813       0.282776       0.231500   -9999.000000       0.102100       0.123000
56881     56881     yunnan         103.1597       24.4497          142       133     2012      04        10        101              0.000000      19.679169       0.646348       0.256268       0.219000       0.107900       0.086100   -9999.000000
56881     56881     yunnan         103.1597       24.4497          142       133     2012      04        11        102              0.000000      20.543549       0.159521       0.245615   -9999.000000       0.151700   -9999.000000       0.110000
56881     56881     yunnan         103.1597       24.4497          142       133     2012      04        12        103              0.000000      21.668518       0.706579       0.233357   -9999.000000   -9999.000000   -9999.000000       0.137000
56881     56881     yunnan         103.1597       24.4497          142       133     2012      04        13        104              0.000000      20.582245       0.032222       0.231491       0.173500       0.020900       0.097500       0.107000
56881     56881     yunnan         103.1597       24.4497          142       133     2012      04        14        105              0.000000      22.251984       0.045117       0.220923       0.172500   -9999.000000       0.101500       0.197000
56881     56881     yunnan         103.1597       24.4497          142       133     2012      04        15        106              0.000000      23.318878       0.026036       0.207777       0.182500       0.032200       0.098200   -9999.000000
56881     56881     yunnan         103.1597       24.4497          142       133     2012      04        16        107              0.000000      23.539978       6.253335       0.197365   -9999.000000   -9999.000000   -9999.000000       0.115000
56881     56881     yunnan         103.1597       24.4497          142       133     2012      04        17        108              0.000000      24.177765       0.178461       0.188668   -9999.000000   -9999.000000   -9999.000000   -9999.000000
56881     56881     yunnan         103.1597       24.4497          142       133     2012      04        18        109              0.000000      24.410919       0.000000       0.180248       0.172500       0.075500   -9999.000000       0.130000
56881     56881     yunnan         103.1597       24.4497          142       133     2012      04        19        110              0.000000      25.147797       0.023753       0.173019       0.173500   -9999.000000       0.110500       0.260000
56881     56881     yunnan         103.1597       24.4497          142       133     2012      04        20        111              0.000000      24.361237       4.235250       0.169152       0.194000       0.074500       0.102400   -9999.000000
56881     56881     yunnan         103.1597       24.4497          142       133     2012      04        21        112              0.000000      22.634338       0.156445       0.205428   -9999.000000       0.110000       0.092200       0.047000
56881     56881     yunnan         103.1597       24.4497          142       133     2012      04        22        113              0.000000      22.615631       1.444678       0.203396   -9999.000000   -9999.000000   -9999.000000   -9999.000000
56881     56881     yunnan         103.1597       24.4497          142       133     2012      04        23        114              0.000000      21.749420       0.232666       0.207608       0.136000       0.074000   -9999.000000       0.105000
56881     56881     yunnan         103.1597       24.4497          142       133     2012      04        24        115              0.000000      23.436859       0.000000       0.199186       0.147000   -9999.000000   -9999.000000       0.162000
56881     56881     yunnan         103.1597       24.4497          142       133     2012      04        25        116              0.000000      24.795288       5.585156       0.180865       0.154000   -9999.000000       0.110700       0.208000
56881     56881     yunnan         103.1597       24.4497          142       133     2012      04        26        117              0.000000      23.889557       0.309255       0.173067       0.150000       0.112500       0.105100       0.246000
56881     56881     yunnan         103.1597       24.4497          142       133     2012      04        27        118              0.000000      23.450256       0.308936       0.171633   -9999.000000   -9999.000000       0.092300   -9999.000000
56881     56881     yunnan         103.1597       24.4497          142       133     2012      04        28        119              0.000000      25.083679       0.814746       0.168726   -9999.000000       0.064800   -9999.000000       0.156000
56881     56881     yunnan         103.1597       24.4497          142       133     2012      04        29        120              0.000000      24.314606       1.202588       0.171966       0.153500       0.100700   -9999.000000       0.203000
56881     56881     yunnan         103.1597       24.4497          142       133     2012      04        30        121              0.000000      25.345306       6.158106       0.170232       0.146500   -9999.000000       0.107200       0.172000
56881     56881     yunnan         103.1597       24.4497          142       133     2012      05        01        122              0.000000      25.331146       1.147925       0.167442       0.170000       0.048900       0.111200       0.294000
56881     56881     yunnan         103.1597       24.4497          142       133     2012      05        02        123              0.000000      26.061859       0.072230       0.157463   -9999.000000   -9999.000000       0.097600   -9999.000000
56881     56881     yunnan         103.1597       24.4497          142       133     2012      05        03        124              0.000000      26.373657       0.000000       0.152414   -9999.000000       0.038200   -9999.000000       0.247000
56881     56881     yunnan         103.1597       24.4497          142       133     2012      05        04        125              0.000000      26.474548       5.865406       0.148572       0.154500       0.179200   -9999.000000   -9999.000000
56881     56881     yunnan         103.1597       24.4497          142       133     2012      05        05        126              0.000000      27.761932       1.327718       0.146221       0.157000   -9999.000000   -9999.000000       0.322000
56881     56881     yunnan         103.1597       24.4497          142       133     2012      05        06        127              0.000000      25.223724       0.761716       0.163190       0.196000       0.217200       0.130100       0.127000
56881     56881     yunnan         103.1597       24.4497          142       133     2012      05        07        128              0.000000      23.609222       7.666375       0.169971   -9999.000000   -9999.000000       0.132400       0.889000
56881     56881     yunnan         103.1597       24.4497          142       133     2012      05        08        129              0.000000      22.525299      11.787942       0.224012   -9999.000000       0.415000       0.138000       0.846000
56881     56881     yunnan         103.1597       24.4497          142       133     2012      05        09        130              0.000000      20.731934       0.614915       0.277079       0.201000       0.371900   -9999.000000   -9999.000000
56881     56881     yunnan         103.1597       24.4497          142       133     2012      05        10        131              0.000000      24.675995       2.139670       0.246294       0.205500   -9999.000000   -9999.000000       0.255000
56881     56881     yunnan         103.1597       24.4497          142       133     2012      05        11        132              0.000000      24.033478       2.185364       0.244376       0.198000       0.189200   -9999.000000       0.324000
56881     56881     yunnan         103.1597       24.4497          142       133     2012      05        12        133              0.000000      25.590363       0.124429       0.227407   -9999.000000   -9999.000000       0.127000       0.210000
56881     56881     yunnan         103.1597       24.4497          142       133     2012      05        13        134              0.000000      26.307281       0.137880       0.213383   -9999.000000   -9999.000000       0.111500       0.381000
56881     56881     yunnan         103.1597       24.4497          142       133     2012      05        14        135              0.000000      26.311005       1.551916       0.201078       0.225000       0.245700       0.089000   -9999.000000
56881     56881     yunnan         103.1597       24.4497          142       133     2012      05        15        136              0.000000      25.231873       0.063659       0.201500       0.202000   -9999.000000   -9999.000000       0.123000
56881     56881     yunnan         103.1597       24.4497          142       133     2012      05        16        137              0.000000      21.832031       1.558279       0.206077       0.189500       0.182600   -9999.000000   -9999.000000
56881     56881     yunnan         103.1597       24.4497          142       133     2012      05        17        138              0.000000      25.689178       1.544660       0.198139   -9999.000000       0.099300       0.109400       0.234000
56881     56881     yunnan         103.1597       24.4497          142       133     2012      05        18        139              0.000000      24.240692       0.174394       0.218471   -9999.000000   -9999.000000       0.104100       0.334000
56881     56881     yunnan         103.1597       24.4497          142       133     2012      05        19        140              0.000000      24.918030       0.981181       0.204385   -9999.000000       0.113700       0.099100   -9999.000000
56881     56881     yunnan         103.1597       24.4497          142       133     2012      05        20        141              0.000000      26.613586       1.842844       0.199684       0.176000   -9999.000000   -9999.000000       0.206000
56881     56881     yunnan         103.1597       24.4497          142       133     2012      05        21        142              0.000000      26.930389      10.781075       0.202895       0.174000       0.055500   -9999.000000   -9999.000000
56881     56881     yunnan         103.1597       24.4497          142       133     2012      05        22        143              0.000000      27.335754      17.703224       0.192457       0.197500       0.077100   -9999.000000       0.446000
56881     56881     yunnan         103.1597       24.4497          142       133     2012      05        23        144              0.000000      26.176636       0.106368       0.243412   -9999.000000   -9999.000000       0.111800       0.690000
56881     56881     yunnan         103.1597       24.4497          142       133     2012      05        24        145              0.000000      25.433167       0.959998       0.255525   -9999.000000       0.171200       0.111000       0.331000
56881     56881     yunnan         103.1597       24.4497          142       133     2012      05        25        146              0.000000      24.476440       0.740184       0.241053       0.222500   -9999.000000       0.103700       0.420000
56881     56881     yunnan         103.1597       24.4497          142       133     2012      05        26        147              0.000000      20.212036       0.053030       0.238888       0.203000       0.165900   -9999.000000   -9999.000000
56881     56881     yunnan         103.1597       24.4497          142       133     2012      05        27        148              0.000000      21.722076       2.567224       0.231280       0.206000       0.198100   -9999.000000       0.248000
56881     56881     yunnan         103.1597       24.4497          142       133     2012      05        28        149              0.000000      23.973114       4.342730       0.229518   -9999.000000   -9999.000000   -9999.000000       0.701000
56881     56881     yunnan         103.1597       24.4497          142       133     2012      05        29        150              0.000000      23.371033       2.797089       0.250614   -9999.000000       0.193900       0.129600   -9999.000000
56881     56881     yunnan         103.1597       24.4497          142       133     2012      05        30        151              0.000000      21.419098       0.000000       0.257839       0.220500   -9999.000000       0.122000   -9999.000000
56881     56881     yunnan         103.1597       24.4497          142       133     2012      05        31        152              0.000000      20.713104       0.069115       0.241104       0.216500   -9999.000000   -9999.000000   -9999.000000
56881     56881     yunnan         103.1597       24.4497          142       133     2012      06        01        153              0.000000      21.926849      38.976734       0.234099       0.219000       0.342300   -9999.000000       1.000000
56881     56881     yunnan         103.1597       24.4497          142       133     2012      06        02        154              0.000000      21.744751       1.319186       0.292618   -9999.000000   -9999.000000   -9999.000000   -9999.000000
56881     56881     yunnan         103.1597       24.4497          142       133     2012      06        03        155              0.000000      19.213318       2.981802       0.301266   -9999.000000       0.364300   -9999.000000       0.795000
56881     56881     yunnan         103.1597       24.4497          142       133     2012      06        04        156              0.000000      21.793335       1.160395       0.288339       0.242000   -9999.000000       0.134500       0.964000
56881     56881     yunnan         103.1597       24.4497          142       133     2012      06        05        157              0.000000      22.974884       0.000000       0.281881       0.200000   -9999.000000       0.108300       0.477000
56881     56881     yunnan         103.1597       24.4497          142       133     2012      06        06        158              0.000000      25.363922       1.471603       0.264482       0.192000       0.194500   -9999.000000       0.408000
56881     56881     yunnan         103.1597       24.4497          142       133     2012      06        07        159              0.000000      26.154572       0.946221       0.256636       0.207000   -9999.000000   -9999.000000   -9999.000000
56881     56881     yunnan         103.1597       24.4497          142       133     2012      06        08        160              0.000000      25.230804       1.343340       0.252643   -9999.000000       0.091100   -9999.000000       0.386000
56881     56881     yunnan         103.1597       24.4497          142       133     2012      06        09        161              0.000000      24.597382       4.424383       0.251806   -9999.000000       0.155700       0.112100       0.831000
56881     56881     yunnan         103.1597       24.4497          142       133     2012      06        10        162              0.000000      24.818207       2.882198       0.267674       0.201000   -9999.000000       0.123000       0.488000
56881     56881     yunnan         103.1597       24.4497          142       133     2012      06        11        163              0.000000      24.381775       5.970931       0.261421       0.240000       0.241900       0.081500       0.595000
56881     56881     yunnan         103.1597       24.4497          142       133     2012      06        12        164              0.000000      23.316010       2.153545       0.272777       0.240000   -9999.000000   -9999.000000   -9999.000000
56881     56881     yunnan         103.1597       24.4497          142       133     2012      06        13        165              0.000000      23.672424       4.443684       0.269081   -9999.000000       0.143400   -9999.000000       0.396000
56881     56881     yunnan         103.1597       24.4497          142       133     2012      06        14        166              0.000000      24.720917       3.155284       0.265372   -9999.000000       0.206700   -9999.000000   -9999.000000
56881     56881     yunnan         103.1597       24.4497          142       133     2012      06        15        167              0.000000      22.122223       0.000000       0.275970       0.199000   -9999.000000       0.072300       0.414000
56881     56881     yunnan         103.1597       24.4497          142       133     2012      06        16        168              0.000000      22.518158       0.000000       0.258704       0.206000       0.158200       0.073400       0.364000
56881     56881     yunnan         103.1597       24.4497          142       133     2012      06        17        169              0.000000      21.290375       0.000000       0.253197       0.202500   -9999.000000   -9999.000000   -9999.000000
56881     56881     yunnan         103.1597       24.4497          142       133     2012      06        18        170              0.000000      22.700287       7.973261       0.248085   -9999.000000   -9999.000000   -9999.000000       0.260000
56881     56881     yunnan         103.1597       24.4497          142       133     2012      06        19        171              0.000000      24.196564      15.549095       0.260064   -9999.000000       0.335400   -9999.000000   -9999.000000
56881     56881     yunnan         103.1597       24.4497          142       133     2012      06        20        172              0.000000      21.480652      14.943333       0.305613       0.243000   -9999.000000       0.079300       0.952000
56881     56881     yunnan         103.1597       24.4497          142       133     2012      06        21        173              0.000000      22.668915       4.451845       0.298217       0.279000       0.152500       0.077700       0.993000
56881     56881     yunnan         103.1597       24.4497          142       133     2012      06        22        174              0.000000      23.493622      21.924540       0.302520       0.299500       0.153600       0.073800       0.900000
56881     56881     yunnan         103.1597       24.4497          142       133     2012      06        23        175              0.000000      23.019958      12.217415       0.316934   -9999.000000   -9999.000000   -9999.000000       0.880000
56881     56881     yunnan         103.1597       24.4497          142       133     2012      06        24        176              0.000000      23.291779       4.976817       0.318168   -9999.000000       0.266100   -9999.000000   -9999.000000
56881     56881     yunnan         103.1597       24.4497          142       133     2012      06        25        177              0.000000      23.194031       0.463190       0.306623       0.253000   -9999.000000   -9999.000000       0.537000
56881     56881     yunnan         103.1597       24.4497          142       133     2012      06        26        178              0.000000      22.669098       7.783630       0.290377       0.249000       0.159400       0.078700       0.666000
56881     56881     yunnan         103.1597       24.4497          142       133     2012      06        27        179              0.000000      23.060730       4.101220       0.296588       0.235500       0.190800       0.076100       0.490000
56881     56881     yunnan         103.1597       24.4497          142       133     2012      06        28        180              0.000000      23.527893       2.323385       0.292459       0.251000   -9999.000000       0.067300       0.535000
56881     56881     yunnan         103.1597       24.4497          142       133     2012      06        29        181              0.000000      23.230896       1.517702       0.286619   -9999.000000       0.179800   -9999.000000   -9999.000000
56881     56881     yunnan         103.1597       24.4497          142       133     2012      06        30        182              0.000000      24.836090       3.892262       0.279430   -9999.000000   -9999.000000   -9999.000000   -9999.000000
56881     56881     yunnan         103.1597       24.4497          142       133     2012      07        01        183              0.000000      24.972137      14.289621       0.276934       0.164500       0.241300       0.098700   -9999.000000
56881     56881     yunnan         103.1597       24.4497          142       133     2012      07        02        184              0.000000      23.541687       1.338283       0.299609       0.156000       0.229100       0.109500       0.585000
56881     56881     yunnan         103.1597       24.4497          142       133     2012      07        03        185              0.000000      23.808014       6.822508       0.295481       0.153000   -9999.000000       0.101700       0.677000
56881     56881     yunnan         103.1597       24.4497          142       133     2012      07        04        186              0.000000      23.737122       5.550604       0.279029   -9999.000000       0.352800   -9999.000000       0.836000
56881     56881     yunnan         103.1597       24.4497          142       133     2012      07        05        187              0.000000      22.935913       0.887603       0.286147   -9999.000000   -9999.000000   -9999.000000       0.607000
56881     56881     yunnan         103.1597       24.4497          142       133     2012      07        06        188              0.000000      23.843628       0.375922       0.279009   -9999.000000   -9999.000000   -9999.000000   -9999.000000
56881     56881     yunnan         103.1597       24.4497          142       133     2012      07        07        189              0.000000      24.732208       0.099284       0.268381   -9999.000000       0.239600       0.101300       0.361000
56881     56881     yunnan         103.1597       24.4497          142       133     2012      07        08        190              0.000000      24.891052       1.788359       0.260211       0.141000   -9999.000000       0.104000       0.518000
56881     56881     yunnan         103.1597       24.4497          142       133     2012      07        09        191              0.000000      24.785461       0.167074       0.257417   -9999.000000       0.093500       0.091200       0.410000
56881     56881     yunnan         103.1597       24.4497          142       133     2012      07        10        192              0.000000      24.929962       1.479534       0.255164   -9999.000000       0.059100   -9999.000000       0.458000
56881     56881     yunnan         103.1597       24.4497          142       133     2012      07        11        193              0.000000      25.208191       0.142873       0.251205       0.194000   -9999.000000   -9999.000000   -9999.000000
56881     56881     yunnan         103.1597       24.4497          142       133     2012      07        12        194              0.000000      25.174774       0.154496       0.247376       0.212000       0.095000   -9999.000000       0.338000
56881     56881     yunnan         103.1597       24.4497          142       133     2012      07        13        195              0.000000      24.897125      38.560242       0.242593       0.262000   -9999.000000       0.116000   -9999.000000
56881     56881     yunnan         103.1597       24.4497          142       133     2012      07        14        196              0.000000      23.010864      11.797129       0.316852       0.228000       0.180300       0.108200       0.884000
56881     56881     yunnan         103.1597       24.4497          142       133     2012      07        15        197              0.000000      21.819397       0.166017       0.318171   -9999.000000       0.270400       0.097300       0.903000
56881     56881     yunnan         103.1597       24.4497          142       133     2012      07        16        198              0.000000      22.167847       5.674028       0.293412   -9999.000000   -9999.000000   -9999.000000   -9999.000000
56881     56881     yunnan         103.1597       24.4497          142       133     2012      07        17        199              0.000000      22.200226      14.128409       0.294235       0.261000       0.265700   -9999.000000       1.000000
56881     56881     yunnan         103.1597       24.4497          142       133     2012      07        18        200              0.000000      22.218781      25.642706       0.311570       0.278500   -9999.000000       0.147600   -9999.000000
56881     56881     yunnan         103.1597       24.4497          142       133     2012      07        19        201              0.000000      22.299683       5.852746       0.329919       0.265500       0.241800       0.135800       0.898000
56881     56881     yunnan         103.1597       24.4497          142       133     2012      07        20        202              0.000000      22.608093       0.578936       0.315940   -9999.000000       0.254700       0.131800       0.957000
56881     56881     yunnan         103.1597       24.4497          142       133     2012      07        21        203              0.000000      24.022003       0.000000       0.295597   -9999.000000   -9999.000000   -9999.000000       0.660000
56881     56881     yunnan         103.1597       24.4497          142       133     2012      07        22        204              0.000000      24.015381      13.934858       0.284364       0.328000       0.249400   -9999.000000       0.788000
56881     56881     yunnan         103.1597       24.4497          142       133     2012      07        23        205              0.000000      23.264221       3.695888       0.299243       0.298000   -9999.000000   -9999.000000   -9999.000000
56881     56881     yunnan         103.1597       24.4497          142       133     2012      07        24        206              0.000000      23.039764       1.414561       0.302866       0.305000   -9999.000000       0.119000       0.740000
56881     56881     yunnan         103.1597       24.4497          142       133     2012      07        25        207              0.000000      22.604156       5.052824       0.289237       0.348000       0.347100       0.121300       0.822000
56881     56881     yunnan         103.1597       24.4497          142       133     2012      07        26        208              0.000000      21.288666       7.998693       0.294528   -9999.000000   -9999.000000       0.118300       0.786000
56881     56881     yunnan         103.1597       24.4497          142       133     2012      07        27        209              0.000000      22.050171       6.009363       0.295270   -9999.000000       0.204700   -9999.000000       0.910000
56881     56881     yunnan         103.1597       24.4497          142       133     2012      07        28        210              0.000000      23.223907      11.481515       0.298262       0.304500   -9999.000000   -9999.000000   -9999.000000
56881     56881     yunnan         103.1597       24.4497          142       133     2012      07        29        211              0.000000      21.517273      11.762000       0.313620       0.302500   -9999.000000   -9999.000000       0.952000
56881     56881     yunnan         103.1597       24.4497          142       133     2012      07        30        212              0.000000      22.063232       2.476745       0.314333       0.299500       0.226000       0.158400   -9999.000000
56881     56881     yunnan         103.1597       24.4497          142       133     2012      07        31        213              0.000000      24.404724      25.753561       0.295674   -9999.000000   -9999.000000       0.171000       0.798000
56881     56881     yunnan         103.1597       24.4497          142       133     2012      08        01        214              0.000000      24.477295       8.185629       0.310084   -9999.000000       0.186700       0.139500       0.884000
56881     56881     yunnan         103.1597       24.4497          142       133     2012      08        02        215              0.000000      22.205353       6.227146       0.319242       0.369500       0.207300   -9999.000000       0.836000
56881     56881     yunnan         103.1597       24.4497          142       133     2012      08        03        216              0.000000      23.357361       0.374535       0.308512       0.338000   -9999.000000   -9999.000000       0.695000
56881     56881     yunnan         103.1597       24.4497          142       133     2012      08        04        217              0.000000      24.117065       3.624732       0.293840       0.381500       0.177600       0.175900   -9999.000000
56881     56881     yunnan         103.1597       24.4497          142       133     2012      08        05        218              0.000000      25.194611      10.648979       0.292046   -9999.000000   -9999.000000       0.180000       0.923000
56881     56881     yunnan         103.1597       24.4497          142       133     2012      08        06        219              0.000000      24.858337      23.007162       0.303957   -9999.000000       0.192300       0.201100       0.849000
56881     56881     yunnan         103.1597       24.4497          142       133     2012      08        07        220              0.000000      23.503632       2.121005       0.323830       0.404000       0.239800   -9999.000000       0.875000
56881     56881     yunnan         103.1597       24.4497          142       133     2012      08        08        221              0.000000      22.163391       0.291535       0.306686       0.402500   -9999.000000   -9999.000000       0.835000
56881     56881     yunnan         103.1597       24.4497          142       133     2012      08        09        222              0.000000      23.147003       0.770605       0.293872       0.361500       0.227600   -9999.000000   -9999.000000
56881     56881     yunnan         103.1597       24.4497          142       133     2012      08        10        223              0.000000      23.141327       0.000000       0.288748       0.358500   -9999.000000       0.204000       0.581000
56881     56881     yunnan         103.1597       24.4497          142       133     2012      08        11        224              0.000000      23.854950       0.288463       0.282607   -9999.000000   -9999.000000       0.187200   -9999.000000
56881     56881     yunnan         103.1597       24.4497          142       133     2012      08        12        225              0.000000      24.974396       4.497722       0.278143   -9999.000000       0.192600       0.158300       0.565000
56881     56881     yunnan         103.1597       24.4497          142       133     2012      08        13        226              0.000000      25.760101       6.471176       0.280616       0.255000   -9999.000000   -9999.000000       0.677000
56881     56881     yunnan         103.1597       24.4497          142       133     2012      08        14        227              0.000000      23.382874       1.123196       0.299832       0.277500       0.194700   -9999.000000   -9999.000000
56881     56881     yunnan         103.1597       24.4497          142       133     2012      08        15        228              0.000000      24.364288       5.150081       0.287733       0.287500   -9999.000000   -9999.000000       0.612000
56881     56881     yunnan         103.1597       24.4497          142       133     2012      08        16        229              0.000000      23.898132       1.197440       0.296527   -9999.000000   -9999.000000       0.156400   -9999.000000
56881     56881     yunnan         103.1597       24.4497          142       133     2012      08        17        230              0.000000      24.471771       1.457713       0.285098   -9999.000000       0.155600       0.169800       0.676000
56881     56881     yunnan         103.1597       24.4497          142       133     2012      08        18        231              0.000000      25.122101      12.531941       0.282842       0.333000   -9999.000000   -9999.000000       0.880000
56881     56881     yunnan         103.1597       24.4497          142       133     2012      08        19        232              0.000000      21.148468      13.648087       0.304444       0.296000       0.190600   -9999.000000       0.774000
56881     56881     yunnan         103.1597       24.4497          142       133     2012      08        20        233              0.000000      22.859283       0.076058       0.315385       0.282000       0.170900   -9999.000000       0.818000
56881     56881     yunnan         103.1597       24.4497          142       133     2012      08        21        234              0.000000      24.203979       4.188599       0.293581       0.320000   -9999.000000       0.143500   -9999.000000
56881     56881     yunnan         103.1597       24.4497          142       133     2012      08        22        235              0.000000      23.255737       1.112019       0.296305   -9999.000000       0.135800       0.171000   -9999.000000
56881     56881     yunnan         103.1597       24.4497          142       133     2012      08        23        236              0.000000      22.848969       1.438143       0.289805   -9999.000000   -9999.000000       0.140400       0.854000
56881     56881     yunnan         103.1597       24.4497          142       133     2012      08        24        237              0.000000      21.896118       0.000000       0.290052       0.296000       0.102800   -9999.000000   -9999.000000
56881     56881     yunnan         103.1597       24.4497          142       133     2012      08        25        238              0.000000      21.527069       0.000000       0.286683       0.281000   -9999.000000   -9999.000000   -9999.000000
56881     56881     yunnan         103.1597       24.4497          142       133     2012      08        26        239              0.000000      23.269562       0.000000       0.281350       0.292000   -9999.000000   -9999.000000   -9999.000000
56881     56881     yunnan         103.1597       24.4497          142       133     2012      08        27        240              0.000000      23.000458       1.444496       0.279393   -9999.000000       0.172600       0.110000       0.624000
56881     56881     yunnan         103.1597       24.4497          142       133     2012      08        28        241              0.000000      22.622284       0.431763       0.283091   -9999.000000   -9999.000000       0.118800   -9999.000000
56881     56881     yunnan         103.1597       24.4497          142       133     2012      08        29        242              0.000000      23.969269       0.169836       0.278689       0.269000   -9999.000000       0.107700       0.535000
56881     56881     yunnan         103.1597       24.4497          142       133     2012      08        30        243              0.000000      24.458984       0.089338       0.275123       0.262000       0.138100   -9999.000000       0.563000
56881     56881     yunnan         103.1597       24.4497          142       133     2012      08        31        244              0.000000      24.594238       0.720315       0.271602       0.278000   -9999.000000   -9999.000000       0.462000
56881     56881     yunnan         103.1597       24.4497          142       133     2012      09        01        245              0.000000      24.648376       4.494361       0.271732   -9999.000000       0.208100   -9999.000000       0.545000
56881     56881     yunnan         103.1597       24.4497          142       133     2012      09        02        246              0.000000      24.363770       8.591277       0.278135   -9999.000000   -9999.000000       0.119800   -9999.000000
56881     56881     yunnan         103.1597       24.4497          142       133     2012      09        03        247              0.000000      20.246552       0.841009       0.300744   -9999.000000   -9999.000000       0.153300       0.464000
56881     56881     yunnan         103.1597       24.4497          142       133     2012      09        04        248              0.000000      22.330444       0.000000       0.282852       0.292000       0.216000   -9999.000000       0.646000
56881     56881     yunnan         103.1597       24.4497          142       133     2012      09        05        249              0.000000      22.630310       0.000000       0.275408       0.298500   -9999.000000   -9999.000000       0.486000
56881     56881     yunnan         103.1597       24.4497          142       133     2012      09        06        250              0.000000      22.165222       0.051684       0.271910       0.309000       0.154700   -9999.000000       0.539000
56881     56881     yunnan         103.1597       24.4497          142       133     2012      09        07        251              0.000000      22.361816       0.138538       0.269652   -9999.000000       0.065600       0.141800   -9999.000000
56881     56881     yunnan         103.1597       24.4497          142       133     2012      09        08        252              0.000000      22.582642       0.563392       0.269216   -9999.000000   -9999.000000       0.151400       0.454000
56881     56881     yunnan         103.1597       24.4497          142       133     2012      09        09        253              0.000000      22.516449       1.581596       0.269870       0.282000       0.069200       0.139500   -9999.000000
56881     56881     yunnan         103.1597       24.4497          142       133     2012      09        10        254              0.234050      23.624420       0.088191       0.271202       0.297000   -9999.000000   -9999.000000       0.439000
56881     56881     yunnan         103.1597       24.4497          142       133     2012      09        11        255              0.230750      23.258118       2.521350       0.267292       0.288500       0.077000   -9999.000000       0.562000
56881     56881     yunnan         103.1597       24.4497          142       133     2012      09        12        256              0.266125      22.616211      41.909573       0.268780   -9999.000000       0.078000   -9999.000000   -9999.000000
56881     56881     yunnan         103.1597       24.4497          142       133     2012      09        13        257              0.266000      19.102753      12.833019       0.335230   -9999.000000   -9999.000000       0.109800       0.754000
56881     56881     yunnan         103.1597       24.4497          142       133     2012      09        14        258              0.256667      17.327637       0.765313       0.319809       0.274000       0.244500       0.101100   -9999.000000
56881     56881     yunnan         103.1597       24.4497          142       133     2012      09        15        259              0.237750      17.959808       0.000000       0.304268       0.310000   -9999.000000       0.100100       0.593000
56881     56881     yunnan         103.1597       24.4497          142       133     2012      09        16        260              0.233083      18.549225       0.000000       0.292829       0.294000       0.185000   -9999.000000       0.624000
56881     56881     yunnan         103.1597       24.4497          142       133     2012      09        17        261              0.230000      19.804657       0.040757       0.287882       0.324000       0.287700   -9999.000000       0.351000
56881     56881     yunnan         103.1597       24.4497          142       133     2012      09        18        262              0.239625      20.021149      17.186472       0.285956   -9999.000000   -9999.000000       0.084800       0.566000
56881     56881     yunnan         103.1597       24.4497          142       133     2012      09        19        263              0.264500      20.127319       1.310128       0.302914   -9999.000000       0.201100       0.072500   -9999.000000
56881     56881     yunnan         103.1597       24.4497          142       133     2012      09        20        264              0.242750      18.383362       0.000000       0.307011       0.293000   -9999.000000       0.072100       0.703000
56881     56881     yunnan         103.1597       24.4497          142       133     2012      09        21        265              0.235250      20.633179       0.310627       0.294278   -9999.000000   -9999.000000   -9999.000000       0.683000
56881     56881     yunnan         103.1597       24.4497          142       133     2012      09        22        266              0.232542      20.628326       0.173339       0.290023       0.202500       0.160800   -9999.000000       0.599000
56881     56881     yunnan         103.1597       24.4497          142       133     2012      09        23        267              0.230167      22.224945       0.245275       0.285989   -9999.000000   -9999.000000   -9999.000000       0.668000
56881     56881     yunnan         103.1597       24.4497          142       133     2012      09        24        268              0.228958      22.847687       3.862716       0.283388   -9999.000000       0.203100       0.085400   -9999.000000
56881     56881     yunnan         103.1597       24.4497          142       133     2012      09        25        269              0.228542      23.058533       6.703952       0.290362       0.198500       0.117100       0.086400       0.564000
56881     56881     yunnan         103.1597       24.4497          142       133     2012      09        26        270              0.228250      22.750122      12.744155       0.297902       0.212500   -9999.000000       0.082700   -9999.000000
56881     56881     yunnan         103.1597       24.4497          142       133     2012      09        27        271              0.243786      22.414703       6.553477       0.307935       0.215500       0.178100   -9999.000000       0.876000
56881     56881     yunnan         103.1597       24.4497          142       133     2012      09        28        272              0.253533      20.528809       0.409477       0.308775   -9999.000000   -9999.000000   -9999.000000       0.779000
56881     56881     yunnan         103.1597       24.4497          142       133     2012      09        29        273              0.237542      18.722900       0.000000       0.296938   -9999.000000       0.243300   -9999.000000       0.576000
56881     56881     yunnan         103.1597       24.4497          142       133     2012      09        30        274              0.233083      19.048859       0.205110       0.291757   -9999.000000   -9999.000000       0.094900       0.537000
56881     56881     yunnan         103.1597       24.4497          142       133     2012      10        01        275              0.230750      18.565125       0.075728       0.288870       0.222500   -9999.000000       0.066500   -9999.000000
56881     56881     yunnan         103.1597       24.4497          142       133     2012      10        02        276              0.229500      19.092346       1.003806       0.287124       0.232500       0.324300       0.056600       0.474000
56881     56881     yunnan         103.1597       24.4497          142       133     2012      10        03        277              0.228208      19.863159       1.769893       0.286765       0.242000   -9999.000000   -9999.000000       0.615000
56881     56881     yunnan         103.1597       24.4497          142       133     2012      10        04        278              0.227958      19.244568       2.583561       0.290123   -9999.000000       0.478200   -9999.000000       0.660000
56881     56881     yunnan         103.1597       24.4497          142       133     2012      10        05        279              0.249000      20.895325      20.454729       0.292604   -9999.000000   -9999.000000       0.084900       0.744000
56881     56881     yunnan         103.1597       24.4497          142       133     2012      10        06        280              0.264042      20.506134       0.941919       0.315799       0.244500   -9999.000000       0.078400   -9999.000000
56881     56881     yunnan         103.1597       24.4497          142       133     2012      10        07        281              0.243333      18.369080       0.000000       0.305519       0.233500       0.281400       0.062000       0.518000
56881     56881     yunnan         103.1597       24.4497          142       133     2012      10        08        282              0.234958      19.018372       0.068594       0.295505       0.223000   -9999.000000   -9999.000000   -9999.000000
56881     56881     yunnan         103.1597       24.4497          142       133     2012      10        09        283              0.231708      20.163940       0.086769       0.290224   -9999.000000   -9999.000000   -9999.000000       0.437000
56881     56881     yunnan         103.1597       24.4497          142       133     2012      10        10        284              0.229500      19.959747       0.202882       0.287055   -9999.000000       0.269400   -9999.000000       0.621000
56881     56881     yunnan         103.1597       24.4497          142       133     2012      10        11        285              0.228250      19.154968       0.000000       0.286820       0.259000   -9999.000000       0.095400   -9999.000000
56881     56881     yunnan         103.1597       24.4497          142       133     2012      10        12        286              0.227167      20.265808       0.310445       0.284045       0.293500       0.233000       0.090200       0.572000
56881     56881     yunnan         103.1597       24.4497          142       133     2012      10        13        287              0.226042      19.952759       0.220776       0.284419       0.273000       0.068500       0.085800   -9999.000000
56881     56881     yunnan         103.1597       24.4497          142       133     2012      10        14        288              0.223958      21.090698       2.317529       0.282363       0.293000   -9999.000000   -9999.000000       0.411000
56881     56881     yunnan         103.1597       24.4497          142       133     2012      10        15        289              0.220333      21.534485       2.488389       0.278782   -9999.000000       0.174900   -9999.000000       0.600000
56881     56881     yunnan         103.1597       24.4497          142       133     2012      10        16        290              0.215667      21.554993       3.361610       0.276743   -9999.000000   -9999.000000   -9999.000000       0.404000
56881     56881     yunnan         103.1597       24.4497          142       133     2012      10        17        291              0.211458      21.566559       0.054192       0.280495       0.271500       0.184400       0.136000       0.512000
56881     56881     yunnan         103.1597       24.4497          142       133     2012      10        18        292              0.208042      17.026855       0.000000       0.283643       0.270500       0.177800       0.130700   -9999.000000
56881     56881     yunnan         103.1597       24.4497          142       133     2012      10        19        293              0.203833      19.288818       0.000000       0.277584       0.264000   -9999.000000   -9999.000000       0.390000
56881     56881     yunnan         103.1597       24.4497          142       133     2012      10        20        294              0.199625      19.957123       0.000000       0.273802   -9999.000000       0.176600   -9999.000000       0.560000
56881     56881     yunnan         103.1597       24.4497          142       133     2012      10        21        295              0.196000      19.971222       0.000000       0.271487   -9999.000000   -9999.000000   -9999.000000       0.411000
56881     56881     yunnan         103.1597       24.4497          142       133     2012      10        22        296              0.193000      19.554016       0.000000       0.269674   -9999.000000       0.222200       0.138400       0.491000
56881     56881     yunnan         103.1597       24.4497          142       133     2012      10        23        297              0.190417      19.439850       9.782416       0.269178   -9999.000000       0.237600       0.134000   -9999.000000
56881     56881     yunnan         103.1597       24.4497          142       133     2012      10        24        298              0.188333      18.988770       0.000000       0.267948   -9999.000000   -9999.000000       0.127400       0.387000
56881     56881     yunnan         103.1597       24.4497          142       133     2012      10        25        299              0.000000      19.242157       0.000000       0.267212       0.278000       0.142900   -9999.000000   -9999.000000
56881     56881     yunnan         103.1597       24.4497          142       133     2012      10        26        300              0.184917      19.053894       0.000000       0.265893   -9999.000000   -9999.000000   -9999.000000       0.244000
56881     56881     yunnan         103.1597       24.4497          142       133     2012      10        27        301              0.183458      19.145233       3.107748       0.264782   -9999.000000   -9999.000000   -9999.000000       0.387000
56881     56881     yunnan         103.1597       24.4497          142       133     2012      10        28        302              0.000000      19.019714       0.803766       0.265700       0.315500       0.212300       0.138500       0.267000
56881     56881     yunnan         103.1597       24.4497          142       133     2012      10        29        303              0.181875      19.619476       9.917559       0.266416       0.304500   -9999.000000       0.138100       0.295000
56881     56881     yunnan         103.1597       24.4497          142       133     2012      10        30        304              0.180167      20.071899       4.532450       0.277038       0.383500       0.330900       0.130500   -9999.000000
56881     56881     yunnan         103.1597       24.4497          142       133     2012      10        31        305              0.180792      15.474304       1.777919       0.300468   -9999.000000       0.092000   -9999.000000       0.309000
56881     56881     yunnan         103.1597       24.4497          142       133     2012      11        01        306              0.181208      16.314911       0.157519       0.288859   -9999.000000   -9999.000000   -9999.000000       0.470000
56881     56881     yunnan         103.1597       24.4497          142       133     2012      11        02        307              0.181833      16.783905       0.182318       0.280968       0.300500       0.063200   -9999.000000       0.288000
56881     56881     yunnan         103.1597       24.4497          142       133     2012      11        03        308              0.182167      16.969299       1.510733       0.275808       0.318000   -9999.000000       0.133300       0.449000
56881     56881     yunnan         103.1597       24.4497          142       133     2012      11        04        309              0.182458      17.617218       0.000000       0.273593       0.315500       0.229400       0.123300   -9999.000000
56881     56881     yunnan         103.1597       24.4497          142       133     2012      11        05        310              0.182792      16.851410       0.635337       0.273103   -9999.000000       0.144100   -9999.000000       0.214000
56881     56881     yunnan         103.1597       24.4497          142       133     2012      11        06        311              0.183000      17.433136       0.420501       0.272849   -9999.000000   -9999.000000   -9999.000000   -9999.000000
56881     56881     yunnan         103.1597       24.4497          142       133     2012      11        07        312              0.183208      17.950500       0.370112       0.272138       0.303000       0.175000   -9999.000000       0.407000
56881     56881     yunnan         103.1597       24.4497          142       133     2012      11        08        313              0.182875      18.323853       0.421561       0.271882       0.339000   -9999.000000       0.162000       0.411000
56881     56881     yunnan         103.1597       24.4497          142       133     2012      11        09        314              0.182333      17.816284       0.452068       0.271560       0.315500       0.160400       0.163300   -9999.000000
56881     56881     yunnan         103.1597       24.4497          142       133     2012      11        10        315              0.181708      17.036194       0.000000       0.268836       0.347000       0.277200       0.151300       0.121000
56881     56881     yunnan         103.1597       24.4497          142       133     2012      11        11        316              0.181250      16.982544       0.000000       0.267007   -9999.000000   -9999.000000   -9999.000000   -9999.000000
56881     56881     yunnan         103.1597       24.4497          142       133     2012      11        12        317              0.180739      15.751709       0.000000       0.268518   -9999.000000       0.289400   -9999.000000       0.301000
56881     56881     yunnan         103.1597       24.4497          142       133     2012      11        13        318              0.000000      16.764618       2.682004       0.267011       0.316500   -9999.000000   -9999.000000       0.343000
56881     56881     yunnan         103.1597       24.4497          142       133     2012      11        14        319              0.179417      17.513916       1.134457       0.265486       0.385000   -9999.000000       0.197600       0.259000
56881     56881     yunnan         103.1597       24.4497          142       133     2012      11        15        320              0.179208      17.605957       5.841198       0.269149       0.340500       0.141000       0.187600       0.321000
56881     56881     yunnan         103.1597       24.4497          142       133     2012      11        16        321              0.178542      17.890778       6.472277       0.277994   -9999.000000   -9999.000000       0.195000   -9999.000000
56881     56881     yunnan         103.1597       24.4497          142       133     2012      11        17        322              0.000000      15.376678       0.734993       0.298662   -9999.000000       0.086900   -9999.000000       0.417000
56881     56881     yunnan         103.1597       24.4497          142       133     2012      11        18        323              0.178125      15.444031       0.077909       0.284341       0.337500       0.058900   -9999.000000       0.471000
56881     56881     yunnan         103.1597       24.4497          142       133     2012      11        19        324              0.178292      16.275635       0.058688       0.278078       0.334500   -9999.000000       0.205600       0.301000
56881     56881     yunnan         103.1597       24.4497          142       133     2012      11        20        325              0.178500      17.337250       0.291368       0.273786       0.338500       0.095300       0.211600       0.377000
56881     56881     yunnan         103.1597       24.4497          142       133     2012      11        21        326              0.178375      17.924988       0.000000       0.269844       0.339000   -9999.000000       0.200500   -9999.000000
56881     56881     yunnan         103.1597       24.4497          142       133     2012      11        22        327              0.177833      17.856720       0.000000       0.266563   -9999.000000   -9999.000000   -9999.000000       0.300000
56881     56881     yunnan         103.1597       24.4497          142       133     2012      11        23        328              0.177292      16.964752       0.000000       0.264060   -9999.000000   -9999.000000   -9999.000000   -9999.000000
56881     56881     yunnan         103.1597       24.4497          142       133     2012      11        24        329              0.176542      16.631866       0.000000       0.263772       0.333000   -9999.000000   -9999.000000       0.264000
56881     56881     yunnan         103.1597       24.4497          142       133     2012      11        25        330              0.176250      16.797516       0.146967       0.262165       0.342500       0.154800       0.213500       0.303000
56881     56881     yunnan         103.1597       24.4497          142       133     2012      11        26        331              0.175417      16.519531       0.192106       0.261282       0.365000   -9999.000000       0.168100       0.177000
56881     56881     yunnan         103.1597       24.4497          142       133     2012      11        27        332              0.175167      15.812653       0.292331       0.262515   -9999.000000       0.367900       0.171000       0.202000
56881     56881     yunnan         103.1597       24.4497          142       133     2012      11        28        333              0.174375      15.775482       0.203211       0.262638   -9999.000000       0.213400   -9999.000000   -9999.000000
56881     56881     yunnan         103.1597       24.4497          142       133     2012      11        29        334              0.173667      16.031952       0.000000       0.261233       0.325000   -9999.000000   -9999.000000       0.123000
56881     56881     yunnan         103.1597       24.4497          142       133     2012      11        30        335              0.173125      15.550171       4.923296       0.259805       0.344500       0.211500   -9999.000000       0.299000
56881     56881     yunnan         103.1597       24.4497          142       133     2012      12        01        336              0.172458      15.974365       0.193763       0.259280       0.323000   -9999.000000       0.210200       0.145000
56881     56881     yunnan         103.1597       24.4497          142       133     2012      12        02        337              0.171875      16.255859       0.483892       0.260264   -9999.000000   -9999.000000       0.194900       0.204000
56881     56881     yunnan         103.1597       24.4497          142       133     2012      12        03        338              0.171250      15.606354       0.620190       0.262450   -9999.000000       0.312300   -9999.000000   -9999.000000
56881     56881     yunnan         103.1597       24.4497          142       133     2012      12        04        339              0.170458      15.392883       0.686954       0.260855       0.312000   -9999.000000   -9999.000000       0.059000
56881     56881     yunnan         103.1597       24.4497          142       133     2012      12        05        340              0.169667      15.074432       0.055235       0.259083       0.339000       0.188100   -9999.000000   -9999.000000
56881     56881     yunnan         103.1597       24.4497          142       133     2012      12        06        341              0.169375      10.669495       0.000000       0.261765       0.319500   -9999.000000       0.199800       0.089000
56881     56881     yunnan         103.1597       24.4497          142       133     2012      12        07        342              0.168625      13.355927       0.126456       0.261231       0.355000   -9999.000000       0.198500       0.173000
56881     56881     yunnan         103.1597       24.4497          142       133     2012      12        08        343              0.168167      12.593964       1.818254       0.263500   -9999.000000       0.158900       0.170700   -9999.000000
56881     56881     yunnan         103.1597       24.4497          142       133     2012      12        09        344              0.168125      12.721588      18.087624       0.264987   -9999.000000   -9999.000000   -9999.000000       0.037000
56881     56881     yunnan         103.1597       24.4497          142       133     2012      12        10        345              0.167583      13.833099       1.047198       0.263281       0.306000       0.044800   -9999.000000   -9999.000000
56881     56881     yunnan         103.1597       24.4497          142       133     2012      12        11        346              0.167417      14.247650       0.000000       0.260942       0.281000       0.120100   -9999.000000       0.104000
56881     56881     yunnan         103.1597       24.4497          142       133     2012      12        12        347              0.166750      13.604858       0.343979       0.260302       0.289500   -9999.000000       0.204200       0.159000
56881     56881     yunnan         103.1597       24.4497          142       133     2012      12        13        348              0.166333      13.969452      13.292608       0.259495   -9999.000000       0.046100       0.186800       0.102000
56881     56881     yunnan         103.1597       24.4497          142       133     2012      12        14        349              0.165792      14.154907       0.000000       0.257933   -9999.000000   -9999.000000       0.183100       0.242000
56881     56881     yunnan         103.1597       24.4497          142       133     2012      12        15        350              0.000000      14.299561       0.000000       0.256141       0.271500       0.128500   -9999.000000   -9999.000000
56881     56881     yunnan         103.1597       24.4497          142       133     2012      12        16        351              0.264333      14.080688       0.121589       0.254521       0.283000       0.022400   -9999.000000       0.163000
56881     56881     yunnan         103.1597       24.4497          142       133     2012      12        17        352              0.246875      14.093018       0.090963       0.254101       0.274500   -9999.000000   -9999.000000       0.240000
56881     56881     yunnan         103.1597       24.4497          142       133     2012      12        18        353              0.235500      13.627594       3.018093       0.253401       0.279000       0.218900       0.165300       0.026000
56881     56881     yunnan         103.1597       24.4497          142       133     2012      12        19        354              0.231083      10.718170       0.000000       0.256223   -9999.000000   -9999.000000       0.159800       0.128000
56881     56881     yunnan         103.1597       24.4497          142       133     2012      12        20        355              0.000000      13.665314       0.070236       0.254789   -9999.000000   -9999.000000   -9999.000000   -9999.000000
56881     56881     yunnan         103.1597       24.4497          142       133     2012      12        21        356              0.224875      14.199982       0.000000       0.252519       0.451000       0.282800   -9999.000000       0.130000
56881     56881     yunnan         103.1597       24.4497          142       133     2012      12        22        357              0.222958      13.763062       0.802212       0.251405       0.409000   -9999.000000   -9999.000000   -9999.000000
56881     56881     yunnan         103.1597       24.4497          142       133     2012      12        23        358              0.221500      12.859741       6.282798       0.252757       0.401000       0.210600       0.159800       0.075000
56881     56881     yunnan         103.1597       24.4497          142       133     2012      12        24        359              0.221143       7.983368      12.397387       0.254894   -9999.000000   -9999.000000       0.205700       0.048000
56881     56881     yunnan         103.1597       24.4497          142       133     2012      12        25        360              0.220583      11.752441       0.260293       0.254480   -9999.000000   -9999.000000       0.189100       0.044000
56881     56881     yunnan         103.1597       24.4497          142       133     2012      12        26        361              0.000000      13.258392       1.086372       0.253704       0.369500       0.354100   -9999.000000       0.043000
56881     56881     yunnan         103.1597       24.4497          142       133     2012      12        27        362              0.219385      13.267822       1.419744       0.253161       0.383500   -9999.000000   -9999.000000   -9999.000000
56881     56881     yunnan         103.1597       24.4497          142       133     2012      12        28        363              0.220000      12.917358       0.000000       0.255714       0.394500   -9999.000000   -9999.000000       0.060000
56881     56881     yunnan         103.1597       24.4497          142       133     2012      12        29        364              0.000000      13.257721       0.000000       0.252271   -9999.000000   -9999.000000       0.220200       0.109000
56881     56881     yunnan         103.1597       24.4497          142       133     2012      12        30        365              0.000000      10.575378       0.000000       0.250338   -9999.000000   -9999.000000       0.202000   -9999.000000
56881     56881     yunnan         103.1597       24.4497          142       133     2012      12        31        366              0.215067       3.608643       0.000000       0.252125       0.384000   -9999.000000       0.165000   -9999.000000
