# Supplementary material for: Research on Fusing Multisatellite Soil Moisture Data Based on Bayesian Model Averaging
Source: Hindawi journal article supplement (doi:10.1155/2018/9310838), 2018-06-25
Supplement: f1 [file 9310838.f1.zip › 2012_sm00-10cm_daily_ZDB_ZHY_56959_366days_allin.txt]

56959     56959     yunnan         100.6031       21.9492          152       122     2012      01        01        001              0.000000   -9999.000000       0.000000   -9999.000000   -9999.000000   -9999.000000   -9999.000000   -9999.000000
56959     56959     yunnan         100.6031       21.9492          152       122     2012      01        02        002              0.275435      16.836823       0.161115       0.250173   -9999.000000   -9999.000000       0.236600       0.374000
56959     56959     yunnan         100.6031       21.9492          152       122     2012      01        03        003              0.000000      17.394470       2.624756       0.250030   -9999.000000   -9999.000000       0.230000       0.343000
56959     56959     yunnan         100.6031       21.9492          152       122     2012      01        04        004              0.277850      17.379852      12.133464       0.259183   -9999.000000   -9999.000000       0.245300   -9999.000000
56959     56959     yunnan         100.6031       21.9492          152       122     2012      01        05        005              0.277208      16.907379       0.165778       0.293188   -9999.000000   -9999.000000   -9999.000000       0.199000
56959     56959     yunnan         100.6031       21.9492          152       122     2012      01        06        006              0.277000      16.180573       0.180666       0.273198   -9999.000000   -9999.000000   -9999.000000       0.450000
56959     56959     yunnan         100.6031       21.9492          152       122     2012      01        07        007              0.277000      15.815826       1.914664       0.265901   -9999.000000   -9999.000000   -9999.000000       0.237000
56959     56959     yunnan         100.6031       21.9492          152       122     2012      01        08        008              0.000000      15.625122       0.068881       0.261392   -9999.000000   -9999.000000       0.243800       0.349000
56959     56959     yunnan         100.6031       21.9492          152       122     2012      01        09        009              0.276000      15.219116       0.000000       0.258310       0.500000   -9999.000000       0.286000       0.062000
56959     56959     yunnan         100.6031       21.9492          152       122     2012      01        10        010              0.276000      15.656616       0.000000       0.256365   -9999.000000   -9999.000000   -9999.000000       0.255000
56959     56959     yunnan         100.6031       21.9492          152       122     2012      01        11        011              0.276000      15.538757       0.000000       0.254656   -9999.000000   -9999.000000   -9999.000000   -9999.000000
56959     56959     yunnan         100.6031       21.9492          152       122     2012      01        12        012              0.276000      15.724609       0.361442       0.254583   -9999.000000   -9999.000000   -9999.000000       0.170000
56959     56959     yunnan         100.6031       21.9492          152       122     2012      01        13        013              0.276375      15.660614      25.460506       0.253926   -9999.000000   -9999.000000   -9999.000000       0.169000
56959     56959     yunnan         100.6031       21.9492          152       122     2012      01        14        014              0.277083      15.866791       4.006522       0.301883       0.493000   -9999.000000       0.292000       0.239000
56959     56959     yunnan         100.6031       21.9492          152       122     2012      01        15        015              0.276500      15.848694       0.628271       0.301157       0.500000   -9999.000000       0.286700       0.315000
56959     56959     yunnan         100.6031       21.9492          152       122     2012      01        16        016              0.276000      14.179108       2.017662       0.282113   -9999.000000   -9999.000000   -9999.000000   -9999.000000
56959     56959     yunnan         100.6031       21.9492          152       122     2012      01        17        017              0.000000      13.572021       0.051829       0.274884   -9999.000000   -9999.000000   -9999.000000       0.118000
56959     56959     yunnan         100.6031       21.9492          152       122     2012      01        18        018              0.276000      13.851929       0.000000       0.269663   -9999.000000   -9999.000000   -9999.000000       0.253000
56959     56959     yunnan         100.6031       21.9492          152       122     2012      01        19        019              0.276000      13.828064       0.000000       0.265349       0.494000   -9999.000000       0.340100   -9999.000000
56959     56959     yunnan         100.6031       21.9492          152       122     2012      01        20        020              0.276000      13.681671       0.000000       0.262348       0.500000   -9999.000000       0.334800       0.267000
56959     56959     yunnan         100.6031       21.9492          152       122     2012      01        21        021              0.275083      13.699554       0.000000       0.259529   -9999.000000   -9999.000000       0.324700       0.166000
56959     56959     yunnan         100.6031       21.9492          152       122     2012      01        22        022              0.275000      13.872955       0.000000       0.256874   -9999.000000   -9999.000000   -9999.000000       0.035000
56959     56959     yunnan         100.6031       21.9492          152       122     2012      01        23        023              0.275000      13.915588       0.156794       0.254638   -9999.000000   -9999.000000   -9999.000000   -9999.000000
56959     56959     yunnan         100.6031       21.9492          152       122     2012      01        24        024              0.275000      14.216644       0.000000       0.252530   -9999.000000   -9999.000000   -9999.000000   -9999.000000
56959     56959     yunnan         100.6031       21.9492          152       122     2012      01        25        025              0.275000      14.278839       0.000000       0.250168   -9999.000000   -9999.000000       0.291700       0.253000
56959     56959     yunnan         100.6031       21.9492          152       122     2012      01        26        026              0.275000      14.144440       0.000000       0.248269   -9999.000000   -9999.000000       0.291200       0.071000
56959     56959     yunnan         100.6031       21.9492          152       122     2012      01        27        027              0.274833      14.211853       0.000000       0.246586   -9999.000000   -9999.000000   -9999.000000       0.025000
56959     56959     yunnan         100.6031       21.9492          152       122     2012      01        28        028              0.274000      14.440338       1.134279       0.244808   -9999.000000   -9999.000000   -9999.000000   -9999.000000
56959     56959     yunnan         100.6031       21.9492          152       122     2012      01        29        029              0.274000      14.774475       0.000000       0.243247   -9999.000000   -9999.000000   -9999.000000   -9999.000000
56959     56959     yunnan         100.6031       21.9492          152       122     2012      01        30        030              0.274000      15.057129       0.000000       0.241499   -9999.000000   -9999.000000   -9999.000000       0.144000
56959     56959     yunnan         100.6031       21.9492          152       122     2012      01        31        031              0.274000      15.395264       0.226889       0.239726   -9999.000000   -9999.000000       0.312300       0.146000
56959     56959     yunnan         100.6031       21.9492          152       122     2012      02        01        032              0.274000      15.982910       0.000000       0.238213   -9999.000000   -9999.000000       0.310400       0.186000
56959     56959     yunnan         100.6031       21.9492          152       122     2012      02        02        033              0.274000      16.341614       0.000000       0.235677   -9999.000000   -9999.000000   -9999.000000   -9999.000000
56959     56959     yunnan         100.6031       21.9492          152       122     2012      02        03        034              0.273208      15.592285       0.000000       0.233397   -9999.000000   -9999.000000   -9999.000000   -9999.000000
56959     56959     yunnan         100.6031       21.9492          152       122     2012      02        04        035              0.273000      15.206482       0.000000       0.232280       0.433500   -9999.000000   -9999.000000       0.185000
56959     56959     yunnan         100.6031       21.9492          152       122     2012      02        05        036              0.273000      15.408264       0.000000       0.230876       0.465000   -9999.000000       0.289700       0.121000
56959     56959     yunnan         100.6031       21.9492          152       122     2012      02        06        037              0.273000      15.640564       0.000000       0.228551       0.467000   -9999.000000       0.319300       0.226000
56959     56959     yunnan         100.6031       21.9492          152       122     2012      02        07        038              0.273000      15.780457       0.000000       0.226177   -9999.000000   -9999.000000       0.313500       0.065000
56959     56959     yunnan         100.6031       21.9492          152       122     2012      02        08        039              0.272750      15.667999       0.000000       0.224103   -9999.000000   -9999.000000   -9999.000000       0.173000
56959     56959     yunnan         100.6031       21.9492          152       122     2012      02        09        040              0.272125      15.899384       0.000000       0.222265       0.500000   -9999.000000   -9999.000000   -9999.000000
56959     56959     yunnan         100.6031       21.9492          152       122     2012      02        10        041              0.272000      16.144928       0.000000       0.219786       0.498000   -9999.000000   -9999.000000       0.124000
56959     56959     yunnan         100.6031       21.9492          152       122     2012      02        11        042              0.272000      16.265259       0.000000       0.217527       0.482000   -9999.000000       0.320900       0.288000
56959     56959     yunnan         100.6031       21.9492          152       122     2012      02        12        043              0.272000      16.385498       0.000000       0.215255   -9999.000000   -9999.000000       0.313700       0.028000
56959     56959     yunnan         100.6031       21.9492          152       122     2012      02        13        044              0.272000      16.531769       0.000000       0.212659   -9999.000000   -9999.000000   -9999.000000       0.261000
56959     56959     yunnan         100.6031       21.9492          152       122     2012      02        14        045              0.272000      16.746979       0.000000       0.210642       0.500000   -9999.000000   -9999.000000   -9999.000000
56959     56959     yunnan         100.6031       21.9492          152       122     2012      02        15        046              0.271333      16.837402       0.000000       0.208424       0.416500   -9999.000000   -9999.000000       0.195000
56959     56959     yunnan         100.6031       21.9492          152       122     2012      02        16        047              0.271000      16.928192       0.000000       0.205648       0.458500   -9999.000000   -9999.000000       0.169000
56959     56959     yunnan         100.6031       21.9492          152       122     2012      02        17        048              0.271000      17.206421       0.000000       0.202848   -9999.000000   -9999.000000       0.284700       0.103000
56959     56959     yunnan         100.6031       21.9492          152       122     2012      02        18        049              0.271000      17.575836       0.000000       0.200167   -9999.000000   -9999.000000       0.285600       0.164000
56959     56959     yunnan         100.6031       21.9492          152       122     2012      02        19        050              0.271000      17.627045       0.273263       0.196336   -9999.000000   -9999.000000   -9999.000000   -9999.000000
56959     56959     yunnan         100.6031       21.9492          152       122     2012      02        20        051              0.271000      17.692383       0.337062       0.193739       0.451500   -9999.000000   -9999.000000       0.042000
56959     56959     yunnan         100.6031       21.9492          152       122     2012      02        21        052              0.271000      17.885132       0.000000       0.192806       0.259000   -9999.000000   -9999.000000   -9999.000000
56959     56959     yunnan         100.6031       21.9492          152       122     2012      02        22        053              0.271000      18.259918       0.000000       0.188792       0.275500   -9999.000000       0.240400   -9999.000000
56959     56959     yunnan         100.6031       21.9492          152       122     2012      02        23        054              0.271000      18.279724       0.707673       0.183965   -9999.000000   -9999.000000       0.236600       0.287000
56959     56959     yunnan         100.6031       21.9492          152       122     2012      02        24        055              0.270286      18.246124       0.000000       0.178692   -9999.000000   -9999.000000       0.227400       0.088000
56959     56959     yunnan         100.6031       21.9492          152       122     2012      02        25        056              0.270000      18.317017       0.000000       0.173739       0.238000   -9999.000000   -9999.000000       0.009000
56959     56959     yunnan         100.6031       21.9492          152       122     2012      02        26        057              0.270000      18.025604       0.000000       0.168954       0.247000   -9999.000000   -9999.000000   -9999.000000
56959     56959     yunnan         100.6031       21.9492          152       122     2012      02        27        058              0.270000      18.137451       0.000000       0.163996       0.241500   -9999.000000   -9999.000000   -9999.000000
56959     56959     yunnan         100.6031       21.9492          152       122     2012      02        28        059              0.270000      18.311798       0.075206       0.159737   -9999.000000   -9999.000000       0.182800       0.134000
56959     56959     yunnan         100.6031       21.9492          152       122     2012      02        29        060              0.000000   -9999.000000       0.231738   -9999.000000   -9999.000000   -9999.000000   -9999.000000   -9999.000000
56959     56959     yunnan         100.6031       21.9492          152       122     2012      03        01        061              0.270000      18.796356       1.106787       0.155867       0.271000   -9999.000000   -9999.000000       0.011000
56959     56959     yunnan         100.6031       21.9492          152       122     2012      03        02        062              0.270000      18.597870       0.378945       0.153036       0.267000   -9999.000000   -9999.000000   -9999.000000
56959     56959     yunnan         100.6031       21.9492          152       122     2012      03        03        063              0.269130      18.933899       3.332421       0.151847       0.265000   -9999.000000   -9999.000000   -9999.000000
56959     56959     yunnan         100.6031       21.9492          152       122     2012      03        04        064              0.269227      19.320648       0.350122       0.165680   -9999.000000   -9999.000000       0.198000       0.157000
56959     56959     yunnan         100.6031       21.9492          152       122     2012      03        05        065              0.269545      16.797852       0.050659       0.189540   -9999.000000   -9999.000000       0.188900       0.009000
56959     56959     yunnan         100.6031       21.9492          152       122     2012      03        06        066              0.269533      17.395386       0.131923       0.177466       0.282000   -9999.000000       0.187200       0.049000
56959     56959     yunnan         100.6031       21.9492          152       122     2012      03        07        067              0.000000      17.675446       0.000000       0.169776       0.251500   -9999.000000   -9999.000000       0.055000
56959     56959     yunnan         100.6031       21.9492          152       122     2012      03        08        068              0.269042      18.791382       0.000000       0.162544       0.263500   -9999.000000   -9999.000000       0.184000
56959     56959     yunnan         100.6031       21.9492          152       122     2012      03        09        069              0.269000      19.354431       0.354259       0.155456   -9999.000000   -9999.000000   -9999.000000   -9999.000000
56959     56959     yunnan         100.6031       21.9492          152       122     2012      03        10        070              0.269000      19.684784       0.000000       0.149688   -9999.000000   -9999.000000       0.184800       0.089000
56959     56959     yunnan         100.6031       21.9492          152       122     2012      03        11        071              0.269000      19.895538       0.000000       0.145101   -9999.000000   -9999.000000       0.185400       0.147000
56959     56959     yunnan         100.6031       21.9492          152       122     2012      03        12        072              0.269000      20.594177       0.000000       0.140763       0.195500   -9999.000000       0.176600   -9999.000000
56959     56959     yunnan         100.6031       21.9492          152       122     2012      03        13        073              0.269000      21.296295       0.000000       0.136648       0.211000       0.012200   -9999.000000       0.126000
56959     56959     yunnan         100.6031       21.9492          152       122     2012      03        14        074              0.269000      21.812073       0.000000       0.132635       0.203000   -9999.000000   -9999.000000   -9999.000000
56959     56959     yunnan         100.6031       21.9492          152       122     2012      03        15        075              0.269000      21.454742       0.000000       0.129248   -9999.000000   -9999.000000   -9999.000000       0.097000
56959     56959     yunnan         100.6031       21.9492          152       122     2012      03        16        076              0.269000      21.864380       0.000000       0.126133   -9999.000000   -9999.000000       0.184400       0.218000
56959     56959     yunnan         100.6031       21.9492          152       122     2012      03        17        077              0.269000      21.756622       0.000000       0.123360       0.204500   -9999.000000       0.179900       0.023000
56959     56959     yunnan         100.6031       21.9492          152       122     2012      03        18        078              0.268917      20.851685       0.000000       0.121433       0.204000       0.022900   -9999.000000       0.073000
56959     56959     yunnan         100.6031       21.9492          152       122     2012      03        19        079              0.268708      20.795959       0.000000       0.119866       0.211000   -9999.000000   -9999.000000   -9999.000000
56959     56959     yunnan         100.6031       21.9492          152       122     2012      03        20        080              0.268083      20.519226       0.184016       0.119306   -9999.000000   -9999.000000   -9999.000000       0.001000
56959     56959     yunnan         100.6031       21.9492          152       122     2012      03        21        081              0.268000      21.806488       0.000000       0.118869   -9999.000000   -9999.000000       0.141900   -9999.000000
56959     56959     yunnan         100.6031       21.9492          152       122     2012      03        22        082              0.268000      22.471497       0.000000       0.117689       0.172500   -9999.000000       0.145300       0.015000
56959     56959     yunnan         100.6031       21.9492          152       122     2012      03        23        083              0.268000      23.057526       0.000000       0.116461       0.159000       0.141800       0.144400       0.144000
56959     56959     yunnan         100.6031       21.9492          152       122     2012      03        24        084              0.268000      23.751740       0.617150       0.114900       0.176000   -9999.000000   -9999.000000       0.025000
56959     56959     yunnan         100.6031       21.9492          152       122     2012      03        25        085              0.000000      23.260254       0.518294       0.116683   -9999.000000   -9999.000000   -9999.000000       0.003000
56959     56959     yunnan         100.6031       21.9492          152       122     2012      03        26        086              0.268000      22.205475       0.173341       0.123785   -9999.000000   -9999.000000   -9999.000000   -9999.000000
56959     56959     yunnan         100.6031       21.9492          152       122     2012      03        27        087              0.268000      22.493073       0.211481       0.122958       0.181500   -9999.000000       0.109300       0.042000
56959     56959     yunnan         100.6031       21.9492          152       122     2012      03        28        088              0.268000      23.359375       0.000000       0.120458       0.155000   -9999.000000       0.105400       0.016000
56959     56959     yunnan         100.6031       21.9492          152       122     2012      03        29        089              0.268000      23.519714       0.000000       0.116251       0.164000   -9999.000000       0.102100       0.009000
56959     56959     yunnan         100.6031       21.9492          152       122     2012      03        30        090              0.268000      23.583984       0.000000       0.111114   -9999.000000   -9999.000000   -9999.000000       0.017000
56959     56959     yunnan         100.6031       21.9492          152       122     2012      03        31        091              0.268000      23.482208       0.000000       0.108719   -9999.000000   -9999.000000   -9999.000000   -9999.000000
56959     56959     yunnan         100.6031       21.9492          152       122     2012      04        01        092              0.268000      24.057861       0.000000       0.108020   -9999.000000   -9999.000000   -9999.000000   -9999.000000
56959     56959     yunnan         100.6031       21.9492          152       122     2012      04        02        093              0.268000      23.448242       0.000000       0.108437       0.156500   -9999.000000       0.108000   -9999.000000
56959     56959     yunnan         100.6031       21.9492          152       122     2012      04        03        094              0.268000      24.451630       0.079934       0.107729       0.156000   -9999.000000       0.111200       0.072000
56959     56959     yunnan         100.6031       21.9492          152       122     2012      04        04        095              0.268000      22.434357       4.119033       0.107948       0.175000   -9999.000000   -9999.000000       0.020000
56959     56959     yunnan         100.6031       21.9492          152       122     2012      04        05        096              0.268000      24.245056       0.153959       0.130083   -9999.000000       0.118200   -9999.000000   -9999.000000
56959     56959     yunnan         100.6031       21.9492          152       122     2012      04        06        097              0.268000      23.267914       1.252910       0.152922   -9999.000000   -9999.000000   -9999.000000       0.209000
56959     56959     yunnan         100.6031       21.9492          152       122     2012      04        07        098              0.268000      23.192383       4.664660       0.143594       0.171500   -9999.000000       0.116700   -9999.000000
56959     56959     yunnan         100.6031       21.9492          152       122     2012      04        08        099              0.268000      23.082245       0.085563       0.155868       0.172500   -9999.000000       0.112700       0.036000
56959     56959     yunnan         100.6031       21.9492          152       122     2012      04        09        100              0.268000      21.743256       0.905474       0.178891       0.183500   -9999.000000       0.143700       0.002000
56959     56959     yunnan         100.6031       21.9492          152       122     2012      04        10        101              0.268000      20.980286       2.617473       0.162581   -9999.000000   -9999.000000   -9999.000000       0.061000
56959     56959     yunnan         100.6031       21.9492          152       122     2012      04        11        102              0.268000      21.174927       3.151464       0.176336   -9999.000000   -9999.000000   -9999.000000       0.230000
56959     56959     yunnan         100.6031       21.9492          152       122     2012      04        12        103              0.268000      21.201782       0.033369       0.186583       0.181000   -9999.000000   -9999.000000   -9999.000000
56959     56959     yunnan         100.6031       21.9492          152       122     2012      04        13        104              0.268000      21.706970       0.000000       0.170645       0.202000       0.017000       0.140000       0.092000
56959     56959     yunnan         100.6031       21.9492          152       122     2012      04        14        105              0.268000      23.105255       0.164549       0.148847       0.171500   -9999.000000       0.135700       0.269000
56959     56959     yunnan         100.6031       21.9492          152       122     2012      04        15        106              0.268000      23.814331       0.000000       0.132819   -9999.000000   -9999.000000       0.128500       0.157000
56959     56959     yunnan         100.6031       21.9492          152       122     2012      04        16        107              0.268000      24.660767       0.000000       0.121249   -9999.000000   -9999.000000   -9999.000000       0.156000
56959     56959     yunnan         100.6031       21.9492          152       122     2012      04        17        108              0.268000      25.004395       0.000000       0.114183   -9999.000000   -9999.000000   -9999.000000   -9999.000000
56959     56959     yunnan         100.6031       21.9492          152       122     2012      04        18        109              0.268000      25.137634       0.000000       0.110285       0.171500   -9999.000000   -9999.000000       0.131000
56959     56959     yunnan         100.6031       21.9492          152       122     2012      04        19        110              0.268000      26.122040       1.946077       0.107889       0.174500   -9999.000000       0.111100   -9999.000000
56959     56959     yunnan         100.6031       21.9492          152       122     2012      04        20        111              0.267917      26.521393       0.193707       0.106524       0.206000       0.142500       0.109200       0.040000
56959     56959     yunnan         100.6031       21.9492          152       122     2012      04        21        112              0.267542      25.683655       0.117913       0.107061   -9999.000000       0.007500   -9999.000000       0.030000
56959     56959     yunnan         100.6031       21.9492          152       122     2012      04        22        113              0.267000      25.542053       0.251367       0.106944   -9999.000000   -9999.000000   -9999.000000       0.060000
56959     56959     yunnan         100.6031       21.9492          152       122     2012      04        23        114              0.267000      26.056335       0.727783       0.106654       0.171000   -9999.000000   -9999.000000       0.169000
56959     56959     yunnan         100.6031       21.9492          152       122     2012      04        24        115              0.267000      26.538757       0.000000       0.105627       0.168500   -9999.000000       0.137700   -9999.000000
56959     56959     yunnan         100.6031       21.9492          152       122     2012      04        25        116              0.000000      27.019348       0.000000       0.103634       0.160000   -9999.000000       0.140800   -9999.000000
56959     56959     yunnan         100.6031       21.9492          152       122     2012      04        26        117              0.267000      27.082062       0.000000       0.102818   -9999.000000   -9999.000000       0.129900       0.017000
56959     56959     yunnan         100.6031       21.9492          152       122     2012      04        27        118              0.267000      27.614136       1.322578       0.102180   -9999.000000   -9999.000000   -9999.000000       0.017000
56959     56959     yunnan         100.6031       21.9492          152       122     2012      04        28        119              0.267000      25.959442       0.699829       0.102868       0.169000   -9999.000000   -9999.000000       0.088000
56959     56959     yunnan         100.6031       21.9492          152       122     2012      04        29        120              0.267000      27.413788       0.620493       0.106968       0.188000   -9999.000000   -9999.000000   -9999.000000
56959     56959     yunnan         100.6031       21.9492          152       122     2012      04        30        121              0.267000      26.349304       0.988818       0.109863       0.175500   -9999.000000       0.158900   -9999.000000
56959     56959     yunnan         100.6031       21.9492          152       122     2012      05        01        122              0.267000      26.790100       0.054487       0.106932   -9999.000000   -9999.000000       0.157200       0.063000
56959     56959     yunnan         100.6031       21.9492          152       122     2012      05        02        123              0.267000      26.745392       0.000000       0.110607   -9999.000000   -9999.000000   -9999.000000       0.006000
56959     56959     yunnan         100.6031       21.9492          152       122     2012      05        03        124              0.267000      26.767120       0.000000       0.102987       0.208000   -9999.000000   -9999.000000       0.268000
56959     56959     yunnan         100.6031       21.9492          152       122     2012      05        04        125              0.267000      27.307892       0.205001       0.100992       0.196500   -9999.000000   -9999.000000       0.022000
56959     56959     yunnan         100.6031       21.9492          152       122     2012      05        05        126              0.267000      28.403717       7.184251       0.101003   -9999.000000   -9999.000000   -9999.000000       0.341000
56959     56959     yunnan         100.6031       21.9492          152       122     2012      05        06        127              0.268000      25.222748      10.691415       0.159903   -9999.000000       0.098400       0.170300   -9999.000000
56959     56959     yunnan         100.6031       21.9492          152       122     2012      05        07        128              0.275083      23.422913      26.357220       0.214671   -9999.000000   -9999.000000       0.179000       1.000000
56959     56959     yunnan         100.6031       21.9492          152       122     2012      05        08        129              0.274625      22.410919       0.288481       0.293676   -9999.000000   -9999.000000   -9999.000000       0.905000
56959     56959     yunnan         100.6031       21.9492          152       122     2012      05        09        130              0.274000      23.798920       0.425480       0.265123       0.212000       0.073400   -9999.000000       0.224000
56959     56959     yunnan         100.6031       21.9492          152       122     2012      05        10        131              0.274000      25.235138       0.116684       0.239372       0.251000   -9999.000000   -9999.000000       0.452000
56959     56959     yunnan         100.6031       21.9492          152       122     2012      05        11        132              0.274000      25.030640       0.000000       0.224414       0.224000       0.065900       0.153400   -9999.000000
56959     56959     yunnan         100.6031       21.9492          152       122     2012      05        12        133              0.274000      25.845154       1.261889       0.206076   -9999.000000   -9999.000000       0.160600       0.393000
56959     56959     yunnan         100.6031       21.9492          152       122     2012      05        13        134              0.274000      25.533752       0.673517       0.199412   -9999.000000   -9999.000000       0.150500       0.256000
56959     56959     yunnan         100.6031       21.9492          152       122     2012      05        14        135              0.273292      25.269073       0.000000       0.192838       0.212000       0.081500   -9999.000000       0.296000
56959     56959     yunnan         100.6031       21.9492          152       122     2012      05        15        136              0.273000      26.563110       0.000000       0.173065       0.222000   -9999.000000   -9999.000000       0.325000
56959     56959     yunnan         100.6031       21.9492          152       122     2012      05        16        137              0.273000      26.901154      10.452550       0.156597       0.210500   -9999.000000   -9999.000000       0.039000
56959     56959     yunnan         100.6031       21.9492          152       122     2012      05        17        138              0.273292      26.526337      11.636257       0.143756   -9999.000000   -9999.000000       0.212700       0.407000
56959     56959     yunnan         100.6031       21.9492          152       122     2012      05        18        139              0.274000      26.860565       0.000000       0.186916   -9999.000000       0.123100       0.197000   -9999.000000
56959     56959     yunnan         100.6031       21.9492          152       122     2012      05        19        140              0.273458      25.863678       1.478838       0.205665       0.230000       0.079400   -9999.000000       0.320000
56959     56959     yunnan         100.6031       21.9492          152       122     2012      05        20        141              0.274667      26.088989       0.447772       0.192383   -9999.000000   -9999.000000   -9999.000000       0.267000
56959     56959     yunnan         100.6031       21.9492          152       122     2012      05        21        142              0.275000      26.421661       2.866618       0.178140       0.246500   -9999.000000   -9999.000000       0.427000
56959     56959     yunnan         100.6031       21.9492          152       122     2012      05        22        143              0.275208      25.465271       2.540645       0.195100   -9999.000000   -9999.000000   -9999.000000       0.333000
56959     56959     yunnan         100.6031       21.9492          152       122     2012      05        23        144              0.274625      25.183197       0.000000       0.196907   -9999.000000   -9999.000000       0.159200   -9999.000000
56959     56959     yunnan         100.6031       21.9492          152       122     2012      05        24        145              0.274000      26.016571       0.074172       0.176570       0.247000   -9999.000000       0.153200       0.105000
56959     56959     yunnan         100.6031       21.9492          152       122     2012      05        25        146              0.000000      26.460968       9.767875       0.157052       0.184000   -9999.000000   -9999.000000       0.370000
56959     56959     yunnan         100.6031       21.9492          152       122     2012      05        26        147              0.274958      26.758728       5.471219       0.196674       0.284000   -9999.000000   -9999.000000       0.564000
56959     56959     yunnan         100.6031       21.9492          152       122     2012      05        27        148              0.275208      24.468262       2.524978       0.243751   -9999.000000   -9999.000000   -9999.000000       0.523000
56959     56959     yunnan         100.6031       21.9492          152       122     2012      05        28        149              0.275583      25.240570       0.379999       0.230406   -9999.000000   -9999.000000       0.165500   -9999.000000
56959     56959     yunnan         100.6031       21.9492          152       122     2012      05        29        150              0.275500      25.590363       5.506835       0.211065   -9999.000000       0.034900       0.165600   -9999.000000
56959     56959     yunnan         100.6031       21.9492          152       122     2012      05        30        151              0.276417      26.367767      23.143034       0.218559       0.315000   -9999.000000       0.156500   -9999.000000
56959     56959     yunnan         100.6031       21.9492          152       122     2012      05        31        152              0.276083      24.239502      10.168709       0.287401       0.309500   -9999.000000   -9999.000000   -9999.000000
56959     56959     yunnan         100.6031       21.9492          152       122     2012      06        01        153              0.276125      24.195526       5.638825       0.291260       0.231000   -9999.000000   -9999.000000       0.776000
56959     56959     yunnan         100.6031       21.9492          152       122     2012      06        02        154              0.276250      24.388184       7.837552       0.279713   -9999.000000   -9999.000000   -9999.000000       0.804000
56959     56959     yunnan         100.6031       21.9492          152       122     2012      06        03        155              0.275083      24.289429       3.408725       0.283835   -9999.000000       0.168600       0.164200       0.891000
56959     56959     yunnan         100.6031       21.9492          152       122     2012      06        04        156              0.275000      24.531586       0.647997       0.271417       0.220000   -9999.000000       0.127500   -9999.000000
56959     56959     yunnan         100.6031       21.9492          152       122     2012      06        05        157              0.274750      25.419617       3.122784       0.256071       0.218000       0.086900   -9999.000000       0.626000
56959     56959     yunnan         100.6031       21.9492          152       122     2012      06        06        158              0.274083      25.862427       0.208713       0.249519       0.199000       0.100800   -9999.000000       0.556000
56959     56959     yunnan         100.6031       21.9492          152       122     2012      06        07        159              0.274000      26.012451       2.245259       0.235844   -9999.000000   -9999.000000   -9999.000000       0.421000
56959     56959     yunnan         100.6031       21.9492          152       122     2012      06        08        160              0.274000      26.325562       6.086833       0.235061   -9999.000000   -9999.000000       0.132200       0.582000
56959     56959     yunnan         100.6031       21.9492          152       122     2012      06        09        161              0.274958      25.566650       1.353713       0.254722       0.246500   -9999.000000       0.137800   -9999.000000
56959     56959     yunnan         100.6031       21.9492          152       122     2012      06        10        162              0.274583      25.296906       0.293349       0.245691       0.232500   -9999.000000       0.134400       0.451000
56959     56959     yunnan         100.6031       21.9492          152       122     2012      06        11        163              0.000000      25.226471       0.819395       0.233201       0.228000   -9999.000000   -9999.000000       0.691000
56959     56959     yunnan         100.6031       21.9492          152       122     2012      06        12        164              0.274000      25.090607      13.018530       0.227642   -9999.000000   -9999.000000   -9999.000000       0.742000
56959     56959     yunnan         100.6031       21.9492          152       122     2012      06        13        165              0.274542      24.807526       1.661923       0.266487   -9999.000000       0.062500   -9999.000000       0.931000
56959     56959     yunnan         100.6031       21.9492          152       122     2012      06        14        166              0.274167      24.747162       2.358226       0.258638       0.231500   -9999.000000       0.075300       0.526000
56959     56959     yunnan         100.6031       21.9492          152       122     2012      06        15        167              0.275542      24.704407       5.392612       0.249087       0.222000   -9999.000000       0.081600       1.000000
56959     56959     yunnan         100.6031       21.9492          152       122     2012      06        16        168              0.275375      24.375519       0.287310       0.261847       0.227500   -9999.000000       0.074700   -9999.000000
56959     56959     yunnan         100.6031       21.9492          152       122     2012      06        17        169              0.275000      24.330994       0.386488       0.250330   -9999.000000   -9999.000000   -9999.000000       0.476000
56959     56959     yunnan         100.6031       21.9492          152       122     2012      06        18        170              0.275000      25.388794       0.642390       0.235701   -9999.000000       0.071600   -9999.000000       0.736000
56959     56959     yunnan         100.6031       21.9492          152       122     2012      06        19        171              0.274208      25.386292       1.273473       0.227998   -9999.000000   -9999.000000   -9999.000000       0.490000
56959     56959     yunnan         100.6031       21.9492          152       122     2012      06        20        172              0.274000      24.617981       0.228544       0.223685       0.220500   -9999.000000       0.110100       0.751000
56959     56959     yunnan         100.6031       21.9492          152       122     2012      06        21        173              0.274000      24.576752       0.948984       0.220074       0.203000   -9999.000000       0.108200   -9999.000000
56959     56959     yunnan         100.6031       21.9492          152       122     2012      06        22        174              0.274000      24.665466       3.066664       0.214591       0.204500   -9999.000000   -9999.000000       0.758000
56959     56959     yunnan         100.6031       21.9492          152       122     2012      06        23        175              0.273583      24.219269       1.781852       0.226500   -9999.000000   -9999.000000   -9999.000000       0.587000
56959     56959     yunnan         100.6031       21.9492          152       122     2012      06        24        176              0.273542      23.769257       2.988327       0.224964   -9999.000000       0.219100   -9999.000000       0.653000
56959     56959     yunnan         100.6031       21.9492          152       122     2012      06        25        177              0.273000      23.615204       1.104855       0.236127       0.198000   -9999.000000       0.073000       0.758000
56959     56959     yunnan         100.6031       21.9492          152       122     2012      06        26        178              0.273000      23.500427       0.672994       0.228285       0.216000       0.297500       0.070600   -9999.000000
56959     56959     yunnan         100.6031       21.9492          152       122     2012      06        27        179              0.273000      23.303040       0.789898       0.223303       0.192500   -9999.000000       0.071200       0.336000
56959     56959     yunnan         100.6031       21.9492          152       122     2012      06        28        180              0.272375      23.973358       4.396301       0.220383   -9999.000000   -9999.000000   -9999.000000       0.728000
56959     56959     yunnan         100.6031       21.9492          152       122     2012      06        29        181              0.273958      24.098572       0.160922       0.237795   -9999.000000   -9999.000000   -9999.000000   -9999.000000
56959     56959     yunnan         100.6031       21.9492          152       122     2012      06        30        182              0.274083      24.344757       0.079749       0.223213       0.176500   -9999.000000   -9999.000000   -9999.000000
56959     56959     yunnan         100.6031       21.9492          152       122     2012      07        01        183              0.274875      25.404877       5.015136       0.208204       0.145000       0.191600       0.070800       0.552000
56959     56959     yunnan         100.6031       21.9492          152       122     2012      07        02        184              0.275000      24.019531       3.947272       0.234814       0.138500       0.149900       0.100500       0.708000
56959     56959     yunnan         100.6031       21.9492          152       122     2012      07        03        185              0.275000      24.301239       5.267338       0.240841   -9999.000000   -9999.000000       0.082100   -9999.000000
56959     56959     yunnan         100.6031       21.9492          152       122     2012      07        04        186              0.275000      24.973724       3.632844       0.244224   -9999.000000   -9999.000000   -9999.000000       0.662000
56959     56959     yunnan         100.6031       21.9492          152       122     2012      07        05        187              0.274792      24.692322       6.128163       0.243723   -9999.000000   -9999.000000   -9999.000000       0.895000
56959     56959     yunnan         100.6031       21.9492          152       122     2012      07        06        188              0.274000      25.010864       0.123788       0.262414   -9999.000000   -9999.000000   -9999.000000       0.453000
56959     56959     yunnan         100.6031       21.9492          152       122     2012      07        07        189              0.274000      25.374207       1.215756       0.238391   -9999.000000   -9999.000000       0.097200       0.741000
56959     56959     yunnan         100.6031       21.9492          152       122     2012      07        08        190              0.275625      25.345001       8.719633       0.229144       0.148000   -9999.000000       0.099600   -9999.000000
56959     56959     yunnan         100.6031       21.9492          152       122     2012      07        09        191              0.275833      24.278778       6.015553       0.255561   -9999.000000   -9999.000000   -9999.000000       0.631000
56959     56959     yunnan         100.6031       21.9492          152       122     2012      07        10        192              0.275500      24.306641       8.445054       0.265250   -9999.000000   -9999.000000   -9999.000000       0.774000
56959     56959     yunnan         100.6031       21.9492          152       122     2012      07        11        193              0.276250      25.279144       1.526868       0.268063       0.188000   -9999.000000   -9999.000000       0.621000
56959     56959     yunnan         100.6031       21.9492          152       122     2012      07        12        194              0.276000      25.524811       0.355529       0.257752       0.186000       0.080800       0.102700       0.661000
56959     56959     yunnan         100.6031       21.9492          152       122     2012      07        13        195              0.275250      25.693787       0.818294       0.242653       0.181000   -9999.000000       0.101600       0.399000
56959     56959     yunnan         100.6031       21.9492          152       122     2012      07        14        196              0.276417      25.516602      18.724951       0.234208   -9999.000000   -9999.000000       0.105300       1.000000
56959     56959     yunnan         100.6031       21.9492          152       122     2012      07        15        197              0.276875      23.345825       7.921578       0.296183   -9999.000000   -9999.000000   -9999.000000   -9999.000000
56959     56959     yunnan         100.6031       21.9492          152       122     2012      07        16        198              0.276500      23.805420      20.048698       0.288801       0.183000   -9999.000000   -9999.000000       1.000000
56959     56959     yunnan         100.6031       21.9492          152       122     2012      07        17        199              0.277000      23.747589      21.135956       0.302697       0.263000   -9999.000000   -9999.000000       1.000000
56959     56959     yunnan         100.6031       21.9492          152       122     2012      07        18        200              0.276750      22.725128       9.607620       0.322107       0.220000   -9999.000000       0.101800       1.000000
56959     56959     yunnan         100.6031       21.9492          152       122     2012      07        19        201              0.277375      22.574219       8.358943       0.314462   -9999.000000   -9999.000000       0.097200       1.000000
56959     56959     yunnan         100.6031       21.9492          152       122     2012      07        20        202              0.277750      22.593384      10.846431       0.306214   -9999.000000   -9999.000000   -9999.000000   -9999.000000
56959     56959     yunnan         100.6031       21.9492          152       122     2012      07        21        203              0.276174      23.671814       0.994501       0.308008   -9999.000000   -9999.000000   -9999.000000       0.662000
56959     56959     yunnan         100.6031       21.9492          152       122     2012      07        22        204              0.276000      23.950073       8.090487       0.289571       0.200000       0.040600   -9999.000000       0.842000
56959     56959     yunnan         100.6031       21.9492          152       122     2012      07        23        205              0.277042      23.343719      22.722820       0.290792       0.240500   -9999.000000   -9999.000000       1.000000
56959     56959     yunnan         100.6031       21.9492          152       122     2012      07        24        206              0.276667      22.751465      10.119347       0.324266       0.175000   -9999.000000       0.082200       0.844000
56959     56959     yunnan         100.6031       21.9492          152       122     2012      07        25        207              0.277375      24.504150      31.141817       0.308854   -9999.000000       0.060400       0.085700   -9999.000000
56959     56959     yunnan         100.6031       21.9492          152       122     2012      07        26        208              0.277792      23.470367      48.828514       0.332346   -9999.000000   -9999.000000   -9999.000000       1.000000
56959     56959     yunnan         100.6031       21.9492          152       122     2012      07        27        209              0.277417      22.369934      11.958053       0.348724       0.260000       0.117000   -9999.000000       1.000000
56959     56959     yunnan         100.6031       21.9492          152       122     2012      07        28        210              0.277000      22.204681       4.679294       0.326117       0.242000   -9999.000000   -9999.000000       1.000000
56959     56959     yunnan         100.6031       21.9492          152       122     2012      07        29        211              0.277000      22.157227       6.702680       0.307574       0.220500   -9999.000000       0.082400       0.867000
56959     56959     yunnan         100.6031       21.9492          152       122     2012      07        30        212              0.276333      23.225739       5.222557       0.304250   -9999.000000       0.107100       0.072500       0.565000
56959     56959     yunnan         100.6031       21.9492          152       122     2012      07        31        213              0.276833      23.722809       0.605657       0.295111   -9999.000000   -9999.000000       0.069900       0.711000
56959     56959     yunnan         100.6031       21.9492          152       122     2012      08        01        214              0.276458      23.153809      11.978402       0.294649   -9999.000000       0.129200   -9999.000000   -9999.000000
56959     56959     yunnan         100.6031       21.9492          152       122     2012      08        02        215              0.277458      23.147125      21.092779       0.300722       0.251000   -9999.000000   -9999.000000       1.000000
56959     56959     yunnan         100.6031       21.9492          152       122     2012      08        03        216              0.277458      22.861481      18.664055       0.323301       0.276000   -9999.000000   -9999.000000       0.973000
56959     56959     yunnan         100.6031       21.9492          152       122     2012      08        04        217              0.276792      22.748810       2.241394       0.324912       0.249000   -9999.000000       0.071200       0.794000
56959     56959     yunnan         100.6031       21.9492          152       122     2012      08        05        218              0.276000      23.785095       0.310340       0.302457   -9999.000000   -9999.000000       0.069100       0.841000
56959     56959     yunnan         100.6031       21.9492          152       122     2012      08        06        219              0.276000      24.481720       1.123466       0.286608   -9999.000000       0.083800   -9999.000000   -9999.000000
56959     56959     yunnan         100.6031       21.9492          152       122     2012      08        07        220              0.276833      23.812164      21.398602       0.282381       0.244000   -9999.000000   -9999.000000       0.924000
56959     56959     yunnan         100.6031       21.9492          152       122     2012      08        08        221              0.276667      23.569763       0.516606       0.313727       0.234000   -9999.000000   -9999.000000       0.892000
56959     56959     yunnan         100.6031       21.9492          152       122     2012      08        09        222              0.276000      24.333282       6.534240       0.296308       0.220500   -9999.000000   -9999.000000       0.915000
56959     56959     yunnan         100.6031       21.9492          152       122     2012      08        10        223              0.275542      24.866730       2.329151       0.292709   -9999.000000   -9999.000000       0.106700       0.772000
56959     56959     yunnan         100.6031       21.9492          152       122     2012      08        11        224              0.276292      24.589050       3.094103       0.290177   -9999.000000   -9999.000000       0.103600       0.626000
56959     56959     yunnan         100.6031       21.9492          152       122     2012      08        12        225              0.276208      24.654968       0.120136       0.285122       0.227000       0.021000   -9999.000000       0.555000
56959     56959     yunnan         100.6031       21.9492          152       122     2012      08        13        226              0.276792      24.987640       7.634432       0.274059       0.198000   -9999.000000   -9999.000000   -9999.000000
56959     56959     yunnan         100.6031       21.9492          152       122     2012      08        14        227              0.277667      25.003906      22.654144       0.281887       0.252000   -9999.000000   -9999.000000       0.702000
56959     56959     yunnan         100.6031       21.9492          152       122     2012      08        15        228              0.276833      23.925507       2.230960       0.319220   -9999.000000   -9999.000000       0.077900       0.786000
56959     56959     yunnan         100.6031       21.9492          152       122     2012      08        16        229              0.276417      24.257538       0.323652       0.294261   -9999.000000   -9999.000000       0.076900       0.616000
56959     56959     yunnan         100.6031       21.9492          152       122     2012      08        17        230              0.276000      24.478241       1.234610       0.285030   -9999.000000   -9999.000000       0.072200       0.553000
56959     56959     yunnan         100.6031       21.9492          152       122     2012      08        18        231              0.277042      25.340302      78.382591       0.276867   -9999.000000   -9999.000000   -9999.000000   -9999.000000
56959     56959     yunnan         100.6031       21.9492          152       122     2012      08        19        232              0.277292      23.606689      19.187681       0.338450       0.295000   -9999.000000   -9999.000000       0.948000
56959     56959     yunnan         100.6031       21.9492          152       122     2012      08        20        233              0.277208      22.548553       6.980202       0.363578       0.244500   -9999.000000   -9999.000000       1.000000
56959     56959     yunnan         100.6031       21.9492          152       122     2012      08        21        234              0.276250      23.014984       1.266874       0.337746   -9999.000000   -9999.000000       0.066700   -9999.000000
56959     56959     yunnan         100.6031       21.9492          152       122     2012      08        22        235              0.277375      24.182037      10.493343       0.302908   -9999.000000   -9999.000000       0.065700   -9999.000000
56959     56959     yunnan         100.6031       21.9492          152       122     2012      08        23        236              0.277375      22.763458       5.480503       0.312793       0.349000   -9999.000000   -9999.000000   -9999.000000
56959     56959     yunnan         100.6031       21.9492          152       122     2012      08        24        237              0.277542      23.629456       3.257392       0.306898       0.245000   -9999.000000   -9999.000000   -9999.000000
56959     56959     yunnan         100.6031       21.9492          152       122     2012      08        25        238              0.000000      23.041962       0.441352       0.300829       0.291500   -9999.000000   -9999.000000   -9999.000000
56959     56959     yunnan         100.6031       21.9492          152       122     2012      08        26        239              0.276000      23.466125       1.015526       0.292096   -9999.000000   -9999.000000       0.061400       0.806000
56959     56959     yunnan         100.6031       21.9492          152       122     2012      08        27        240              0.277125      24.403839       3.742748       0.287494   -9999.000000   -9999.000000       0.071800       0.685000
56959     56959     yunnan         100.6031       21.9492          152       122     2012      08        28        241              0.276500      23.184875       0.108858       0.293230   -9999.000000   -9999.000000       0.069300       0.619000
56959     56959     yunnan         100.6031       21.9492          152       122     2012      08        29        242              0.276000      24.317932       0.171050       0.284345       0.265000   -9999.000000   -9999.000000       0.610000
56959     56959     yunnan         100.6031       21.9492          152       122     2012      08        30        243              0.276000      25.059479       1.731406       0.278884       0.300000   -9999.000000   -9999.000000   -9999.000000
56959     56959     yunnan         100.6031       21.9492          152       122     2012      08        31        244              0.275750      25.233582       2.249990       0.279698       0.293000   -9999.000000   -9999.000000       0.673000
56959     56959     yunnan         100.6031       21.9492          152       122     2012      09        01        245              0.276000      24.737213       1.755744       0.283363   -9999.000000   -9999.000000       0.068900       0.631000
56959     56959     yunnan         100.6031       21.9492          152       122     2012      09        02        246              0.277667      24.856171      24.897308       0.280691   -9999.000000   -9999.000000       0.070300       1.000000
56959     56959     yunnan         100.6031       21.9492          152       122     2012      09        03        247              0.276625      23.635498       3.426762       0.321972       0.450500   -9999.000000       0.065800       0.681000
56959     56959     yunnan         100.6031       21.9492          152       122     2012      09        04        248              0.276000      23.778168       0.753751       0.302254       0.461000   -9999.000000   -9999.000000   -9999.000000
56959     56959     yunnan         100.6031       21.9492          152       122     2012      09        05        249              0.276000      24.221344       0.583271       0.288852       0.434000   -9999.000000   -9999.000000       0.704000
56959     56959     yunnan         100.6031       21.9492          152       122     2012      09        06        250              0.276708      23.963104       5.192816       0.282205   -9999.000000   -9999.000000   -9999.000000       0.730000
56959     56959     yunnan         100.6031       21.9492          152       122     2012      09        07        251              0.277292      23.256073       4.749878       0.291359   -9999.000000   -9999.000000       0.076300       0.679000
56959     56959     yunnan         100.6031       21.9492          152       122     2012      09        08        252              0.277417      23.065155       6.122402       0.293236       0.500000   -9999.000000       0.070600       0.769000
56959     56959     yunnan         100.6031       21.9492          152       122     2012      09        09        253              0.277000      23.527985       9.888778       0.298727       0.448000   -9999.000000   -9999.000000       0.768000
56959     56959     yunnan         100.6031       21.9492          152       122     2012      09        10        254              0.276833      23.539185       6.549737       0.305573       0.449000   -9999.000000   -9999.000000       0.702000
56959     56959     yunnan         100.6031       21.9492          152       122     2012      09        11        255              0.277000      23.860474       5.913139       0.301682       0.424000   -9999.000000   -9999.000000   -9999.000000
56959     56959     yunnan         100.6031       21.9492          152       122     2012      09        12        256              0.277375      23.477753      22.068254       0.304278   -9999.000000   -9999.000000       0.050700       1.000000
56959     56959     yunnan         100.6031       21.9492          152       122     2012      09        13        257              0.277750      23.390778      36.661236       0.319644   -9999.000000   -9999.000000       0.056400       0.754000
56959     56959     yunnan         100.6031       21.9492          152       122     2012      09        14        258              0.278000      21.554169       1.113238       0.337039       0.437500   -9999.000000       0.053100       0.775000
56959     56959     yunnan         100.6031       21.9492          152       122     2012      09        15        259              0.277000      19.996277       0.076229       0.310655       0.405500   -9999.000000   -9999.000000       0.718000
56959     56959     yunnan         100.6031       21.9492          152       122     2012      09        16        260              0.277000      20.532196       0.499142       0.302709       0.368000   -9999.000000   -9999.000000   -9999.000000
56959     56959     yunnan         100.6031       21.9492          152       122     2012      09        17        261              0.276333      21.808899       0.251939       0.298107   -9999.000000   -9999.000000   -9999.000000       0.573000
56959     56959     yunnan         100.6031       21.9492          152       122     2012      09        18        262              0.276000      22.952179       0.213382       0.294231   -9999.000000   -9999.000000       0.076900       0.693000
56959     56959     yunnan         100.6031       21.9492          152       122     2012      09        19        263              0.276000      23.982910       2.827193       0.290211       0.370500   -9999.000000       0.077100       0.710000
56959     56959     yunnan         100.6031       21.9492          152       122     2012      09        20        264              0.276833      23.577332       4.929179       0.293687       0.338000   -9999.000000   -9999.000000       0.711000
56959     56959     yunnan         100.6031       21.9492          152       122     2012      09        21        265              0.276458      23.586761       0.153572       0.298388   -9999.000000   -9999.000000   -9999.000000   -9999.000000
56959     56959     yunnan         100.6031       21.9492          152       122     2012      09        22        266              0.276000      24.019836       1.454243       0.290492   -9999.000000   -9999.000000   -9999.000000       0.612000
56959     56959     yunnan         100.6031       21.9492          152       122     2012      09        23        267              0.276000      24.283417       0.073740       0.288177   -9999.000000   -9999.000000   -9999.000000       0.750000
56959     56959     yunnan         100.6031       21.9492          152       122     2012      09        24        268              0.276000      24.259735       2.729185       0.284263   -9999.000000   -9999.000000       0.051900       0.742000
56959     56959     yunnan         100.6031       21.9492          152       122     2012      09        25        269              0.277083      24.279510       2.589590       0.285905       0.252000   -9999.000000       0.051700       0.790000
56959     56959     yunnan         100.6031       21.9492          152       122     2012      09        26        270              0.276333      22.455811       0.324538       0.293255       0.244500   -9999.000000   -9999.000000       0.446000
56959     56959     yunnan         100.6031       21.9492          152       122     2012      09        27        271              0.277857      23.896851       4.899704       0.284214       0.251500   -9999.000000   -9999.000000       0.831000
56959     56959     yunnan         100.6031       21.9492          152       122     2012      09        28        272              0.276933      23.323395       4.878253       0.293662   -9999.000000   -9999.000000   -9999.000000   -9999.000000
56959     56959     yunnan         100.6031       21.9492          152       122     2012      09        29        273              0.276958      23.329071       0.037412       0.292523   -9999.000000   -9999.000000       0.050000       0.524000
56959     56959     yunnan         100.6031       21.9492          152       122     2012      09        30        274              0.277250      22.678772      19.006590       0.289205       0.319000   -9999.000000       0.054600       0.538000
56959     56959     yunnan         100.6031       21.9492          152       122     2012      10        01        275              0.278000      22.191254      17.725519       0.309853       0.463000   -9999.000000       0.085100       0.858000
56959     56959     yunnan         100.6031       21.9492          152       122     2012      10        02        276              0.277458      22.210999      11.236605       0.322318       0.475000   -9999.000000   -9999.000000       0.901000
56959     56959     yunnan         100.6031       21.9492          152       122     2012      10        03        277              0.277292      22.351654       0.697891       0.316261   -9999.000000   -9999.000000   -9999.000000   -9999.000000
56959     56959     yunnan         100.6031       21.9492          152       122     2012      10        04        278              0.277000      23.039398       8.412704       0.297490   -9999.000000   -9999.000000   -9999.000000       0.908000
56959     56959     yunnan         100.6031       21.9492          152       122     2012      10        05        279              0.277000      23.455322       5.193096       0.301714   -9999.000000   -9999.000000       0.093800       0.656000
56959     56959     yunnan         100.6031       21.9492          152       122     2012      10        06        280              0.277333      23.224884       5.950333       0.303897       0.469000   -9999.000000       0.093700       0.836000
56959     56959     yunnan         100.6031       21.9492          152       122     2012      10        07        281              0.277000      23.010773       0.165588       0.306205       0.467500   -9999.000000   -9999.000000       0.718000
56959     56959     yunnan         100.6031       21.9492          152       122     2012      10        08        282              0.276208      22.249176       0.000000       0.295157       0.453500   -9999.000000   -9999.000000       0.657000
56959     56959     yunnan         100.6031       21.9492          152       122     2012      10        09        283              0.276000      21.613190       0.000000       0.289391   -9999.000000   -9999.000000   -9999.000000       0.629000
56959     56959     yunnan         100.6031       21.9492          152       122     2012      10        10        284              0.276000      21.915283       0.000000       0.286121   -9999.000000   -9999.000000   -9999.000000   -9999.000000
56959     56959     yunnan         100.6031       21.9492          152       122     2012      10        11        285              0.276000      22.100983       0.086063       0.283800       0.362000   -9999.000000       0.116100       0.544000
56959     56959     yunnan         100.6031       21.9492          152       122     2012      10        12        286              0.276000      22.069641       0.911666       0.282185       0.387500   -9999.000000       0.114400       0.499000
56959     56959     yunnan         100.6031       21.9492          152       122     2012      10        13        287              0.276833      21.850006       5.778233       0.283822       0.368000   -9999.000000   -9999.000000       0.692000
56959     56959     yunnan         100.6031       21.9492          152       122     2012      10        14        288              0.277000      22.390961       0.617009       0.293305   -9999.000000   -9999.000000   -9999.000000       0.620000
56959     56959     yunnan         100.6031       21.9492          152       122     2012      10        15        289              0.277167      22.794952       5.773712       0.286208   -9999.000000   -9999.000000   -9999.000000   -9999.000000
56959     56959     yunnan         100.6031       21.9492          152       122     2012      10        16        290              0.277125      22.054108       4.413274       0.295496       0.430000   -9999.000000       0.127000       0.623000
56959     56959     yunnan         100.6031       21.9492          152       122     2012      10        17        291              0.277417      22.008423      12.514165       0.294139       0.371000   -9999.000000       0.127400       0.816000
56959     56959     yunnan         100.6031       21.9492          152       122     2012      10        18        292              0.277000      21.917694       0.254410       0.304520       0.383500   -9999.000000       0.122400       0.674000
56959     56959     yunnan         100.6031       21.9492          152       122     2012      10        19        293              0.276250      22.044098       0.000000       0.289582   -9999.000000   -9999.000000   -9999.000000       0.642000
56959     56959     yunnan         100.6031       21.9492          152       122     2012      10        20        294              0.276000      21.924652       0.000000       0.282364   -9999.000000   -9999.000000   -9999.000000   -9999.000000
56959     56959     yunnan         100.6031       21.9492          152       122     2012      10        21        295              0.275875      21.424591       0.000000       0.277804   -9999.000000   -9999.000000   -9999.000000       0.424000
56959     56959     yunnan         100.6031       21.9492          152       122     2012      10        22        296              0.275000      20.543915       0.000000       0.274775   -9999.000000   -9999.000000       0.167700       0.720000
56959     56959     yunnan         100.6031       21.9492          152       122     2012      10        23        297              0.275000      19.791718       0.000000       0.272908   -9999.000000   -9999.000000       0.168100       0.687000
56959     56959     yunnan         100.6031       21.9492          152       122     2012      10        24        298              0.275000      19.928986       0.000000       0.271636   -9999.000000   -9999.000000   -9999.000000   -9999.000000
56959     56959     yunnan         100.6031       21.9492          152       122     2012      10        25        299              0.000000      20.151459       0.000000       0.269328   -9999.000000   -9999.000000   -9999.000000       0.403000
56959     56959     yunnan         100.6031       21.9492          152       122     2012      10        26        300              0.275000      20.201019       0.000000       0.266736   -9999.000000   -9999.000000   -9999.000000       0.634000
56959     56959     yunnan         100.6031       21.9492          152       122     2012      10        27        301              0.275000      20.390686       0.000000       0.264449       0.487000   -9999.000000       0.169200   -9999.000000
56959     56959     yunnan         100.6031       21.9492          152       122     2012      10        28        302              0.000000      20.434631       0.000000       0.263056       0.495500   -9999.000000       0.172400       0.470000
56959     56959     yunnan         100.6031       21.9492          152       122     2012      10        29        303              0.274000      20.785370       0.739069       0.261248       0.483000   -9999.000000       0.195400       0.745000
56959     56959     yunnan         100.6031       21.9492          152       122     2012      10        30        304              0.274000      21.149719       4.303571       0.259693   -9999.000000   -9999.000000   -9999.000000       0.634000
56959     56959     yunnan         100.6031       21.9492          152       122     2012      10        31        305              0.276458      21.397858      21.690004       0.266490   -9999.000000   -9999.000000   -9999.000000       0.871000
56959     56959     yunnan         100.6031       21.9492          152       122     2012      11        01        306              0.276000      19.517334       0.000000       0.315900       0.490000   -9999.000000   -9999.000000   -9999.000000
56959     56959     yunnan         100.6031       21.9492          152       122     2012      11        02        307              0.276000      19.248199       0.049000       0.288802       0.482000   -9999.000000       0.195300       0.575000
56959     56959     yunnan         100.6031       21.9492          152       122     2012      11        03        308              0.275625      19.498138       0.764215       0.279826       0.483000   -9999.000000       0.204100       0.662000
56959     56959     yunnan         100.6031       21.9492          152       122     2012      11        04        309              0.275000      19.006622       0.263277       0.275078       0.500000   -9999.000000       0.197100       0.451000
56959     56959     yunnan         100.6031       21.9492          152       122     2012      11        05        310              0.275000      18.985413       0.198966       0.274177   -9999.000000   -9999.000000   -9999.000000       0.662000
56959     56959     yunnan         100.6031       21.9492          152       122     2012      11        06        311              0.275000      20.143280       0.000000       0.270770   -9999.000000   -9999.000000   -9999.000000       0.363000
56959     56959     yunnan         100.6031       21.9492          152       122     2012      11        07        312              0.275000      20.394897       0.126743       0.267786       0.487000   -9999.000000   -9999.000000       0.359000
56959     56959     yunnan         100.6031       21.9492          152       122     2012      11        08        313              0.275000      20.441254       8.780216       0.265381       0.500000   -9999.000000       0.244400   -9999.000000
56959     56959     yunnan         100.6031       21.9492          152       122     2012      11        09        314              0.275000      20.328033       3.427168       0.283636       0.500000   -9999.000000       0.247300       0.708000
56959     56959     yunnan         100.6031       21.9492          152       122     2012      11        10        315              0.275000      19.237610       0.000000       0.289906   -9999.000000   -9999.000000   -9999.000000       0.803000
56959     56959     yunnan         100.6031       21.9492          152       122     2012      11        11        316              0.275000      19.637482       0.132714       0.277049   -9999.000000   -9999.000000   -9999.000000       0.546000
56959     56959     yunnan         100.6031       21.9492          152       122     2012      11        12        317              0.275000      19.383972       0.485397       0.271761   -9999.000000   -9999.000000   -9999.000000       0.642000
56959     56959     yunnan         100.6031       21.9492          152       122     2012      11        13        318              0.000000      19.825043       6.985565       0.269687   -9999.000000   -9999.000000       0.139400   -9999.000000
56959     56959     yunnan         100.6031       21.9492          152       122     2012      11        14        319              0.277188      19.630707       4.500465       0.285705   -9999.000000   -9999.000000       0.144800       0.903000
56959     56959     yunnan         100.6031       21.9492          152       122     2012      11        15        320              0.277167      20.192200      17.267134       0.287836   -9999.000000   -9999.000000       0.138700       0.704000
56959     56959     yunnan         100.6031       21.9492          152       122     2012      11        16        321              0.277458      20.035400       6.073314       0.303822   -9999.000000   -9999.000000   -9999.000000       1.000000
56959     56959     yunnan         100.6031       21.9492          152       122     2012      11        17        322              0.000000      20.261810       5.149400       0.308986   -9999.000000   -9999.000000   -9999.000000       0.942000
56959     56959     yunnan         100.6031       21.9492          152       122     2012      11        18        323              0.276792      18.905243       0.020687       0.305024   -9999.000000   -9999.000000   -9999.000000   -9999.000000
56959     56959     yunnan         100.6031       21.9492          152       122     2012      11        19        324              0.276000      19.445068       0.137049       0.289476   -9999.000000   -9999.000000       0.283400       0.505000
56959     56959     yunnan         100.6031       21.9492          152       122     2012      11        20        325              0.276583      20.147217       0.717355       0.282032   -9999.000000   -9999.000000       0.284000       0.774000
56959     56959     yunnan         100.6031       21.9492          152       122     2012      11        21        326              0.276042      20.579956       0.017790       0.279176   -9999.000000   -9999.000000   -9999.000000       0.601000
56959     56959     yunnan         100.6031       21.9492          152       122     2012      11        22        327              0.276000      20.322754       0.081918       0.274245   -9999.000000   -9999.000000   -9999.000000       0.748000
56959     56959     yunnan         100.6031       21.9492          152       122     2012      11        23        328              0.276000      19.961060       0.000000       0.270332       0.500000   -9999.000000   -9999.000000       0.365000
56959     56959     yunnan         100.6031       21.9492          152       122     2012      11        24        329              0.276000      19.352661       0.000000       0.267679       0.500000   -9999.000000   -9999.000000       0.665000
56959     56959     yunnan         100.6031       21.9492          152       122     2012      11        25        330              0.275333      18.835968       0.161448       0.265736       0.500000   -9999.000000       0.281200   -9999.000000
56959     56959     yunnan         100.6031       21.9492          152       122     2012      11        26        331              0.275000      18.881897       0.057350       0.264912   -9999.000000   -9999.000000       0.212600       0.579000
56959     56959     yunnan         100.6031       21.9492          152       122     2012      11        27        332              0.275000      19.097534       0.151307       0.263732   -9999.000000   -9999.000000   -9999.000000       0.638000
56959     56959     yunnan         100.6031       21.9492          152       122     2012      11        28        333              0.275000      18.917023       0.147140       0.262319       0.498000   -9999.000000   -9999.000000       0.301000
56959     56959     yunnan         100.6031       21.9492          152       122     2012      11        29        334              0.275000      18.434448       3.943763       0.260743       0.500000   -9999.000000   -9999.000000       0.640000
56959     56959     yunnan         100.6031       21.9492          152       122     2012      11        30        335              0.277333      18.865051       6.607265       0.266035   -9999.000000   -9999.000000       0.228100   -9999.000000
56959     56959     yunnan         100.6031       21.9492          152       122     2012      12        01        336              0.277333      19.172607       1.917577       0.287929   -9999.000000   -9999.000000       0.226600       0.725000
56959     56959     yunnan         100.6031       21.9492          152       122     2012      12        02        337              0.276458      19.639954       0.286137       0.285665   -9999.000000   -9999.000000       0.212400       0.667000
56959     56959     yunnan         100.6031       21.9492          152       122     2012      12        03        338              0.276000      19.147827       0.127973       0.275655   -9999.000000   -9999.000000   -9999.000000       0.357000
56959     56959     yunnan         100.6031       21.9492          152       122     2012      12        04        339              0.276000      17.902069       0.081281       0.270197       0.500000   -9999.000000   -9999.000000       0.705000
56959     56959     yunnan         100.6031       21.9492          152       122     2012      12        05        340              0.276000      17.495911       0.000000       0.266974       0.500000   -9999.000000   -9999.000000       0.375000
56959     56959     yunnan         100.6031       21.9492          152       122     2012      12        06        341              0.276000      16.644562       0.066234       0.264277       0.500000   -9999.000000       0.307600       0.281000
56959     56959     yunnan         100.6031       21.9492          152       122     2012      12        07        342              0.276000      16.540649       0.573282       0.262875   -9999.000000   -9999.000000       0.311000   -9999.000000
56959     56959     yunnan         100.6031       21.9492          152       122     2012      12        08        343              0.276000      16.905640       0.183709       0.262224   -9999.000000   -9999.000000   -9999.000000       0.372000
56959     56959     yunnan         100.6031       21.9492          152       122     2012      12        09        344              0.275167      16.879089       0.164958       0.261382       0.500000   -9999.000000   -9999.000000       0.495000
56959     56959     yunnan         100.6031       21.9492          152       122     2012      12        10        345              0.275000      16.791992       1.152566       0.260246       0.489000   -9999.000000   -9999.000000       0.437000
56959     56959     yunnan         100.6031       21.9492          152       122     2012      12        11        346              0.275000      16.303314       0.178583       0.259239   -9999.000000   -9999.000000       0.312200       0.445000
56959     56959     yunnan         100.6031       21.9492          152       122     2012      12        12        347              0.275000      15.994843       0.089189       0.258638   -9999.000000   -9999.000000       0.315800   -9999.000000
56959     56959     yunnan         100.6031       21.9492          152       122     2012      12        13        348              0.275000      15.857697       0.070868       0.258673   -9999.000000   -9999.000000       0.313600       0.315000
56959     56959     yunnan         100.6031       21.9492          152       122     2012      12        14        349              0.275000      15.985077       0.347894       0.258180   -9999.000000   -9999.000000   -9999.000000       0.602000
56959     56959     yunnan         100.6031       21.9492          152       122     2012      12        15        350              0.000000      16.093689       0.096643       0.257317       0.500000   -9999.000000   -9999.000000       0.165000
56959     56959     yunnan         100.6031       21.9492          152       122     2012      12        16        351              0.274000      15.576996       3.507339       0.256179   -9999.000000   -9999.000000   -9999.000000       0.315000
56959     56959     yunnan         100.6031       21.9492          152       122     2012      12        17        352              0.274000      14.785706       0.169157       0.255378   -9999.000000   -9999.000000       0.293900   -9999.000000
56959     56959     yunnan         100.6031       21.9492          152       122     2012      12        18        353              0.274000      14.737701       0.047250       0.255827   -9999.000000   -9999.000000       0.296400       0.113000
56959     56959     yunnan         100.6031       21.9492          152       122     2012      12        19        354              0.274000      14.973297       0.603886       0.255284   -9999.000000   -9999.000000       0.283900       0.378000
56959     56959     yunnan         100.6031       21.9492          152       122     2012      12        20        355              0.000000      15.171173       0.000000       0.254404   -9999.000000   -9999.000000   -9999.000000       0.271000
56959     56959     yunnan         100.6031       21.9492          152       122     2012      12        21        356              0.274000      14.907501       0.128038       0.253662   -9999.000000   -9999.000000   -9999.000000       0.333000
56959     56959     yunnan         100.6031       21.9492          152       122     2012      12        22        357              0.274000      14.981384       0.287034       0.253242   -9999.000000   -9999.000000   -9999.000000       0.028000
56959     56959     yunnan         100.6031       21.9492          152       122     2012      12        23        358              0.274000      15.215698       0.000000       0.252756   -9999.000000   -9999.000000       0.298900       0.248000
56959     56959     yunnan         100.6031       21.9492          152       122     2012      12        24        359              0.274000      15.646973       0.000000       0.253110   -9999.000000   -9999.000000       0.228900   -9999.000000
56959     56959     yunnan         100.6031       21.9492          152       122     2012      12        25        360              0.273917      15.919098       0.000000       0.254108       0.500000   -9999.000000   -9999.000000       0.305000
56959     56959     yunnan         100.6031       21.9492          152       122     2012      12        26        361              0.000000      16.228149       0.719035       0.253692   -9999.000000   -9999.000000   -9999.000000       0.246000
56959     56959     yunnan         100.6031       21.9492          152       122     2012      12        27        362              0.274000      15.796906       1.341300       0.256041       0.500000   -9999.000000   -9999.000000       0.025000
56959     56959     yunnan         100.6031       21.9492          152       122     2012      12        28        363              0.000000      15.452972       0.065113       0.254410   -9999.000000   -9999.000000       0.219500       0.297000
56959     56959     yunnan         100.6031       21.9492          152       122     2012      12        29        364              0.000000      15.061493       0.064997       0.252882   -9999.000000   -9999.000000       0.226300   -9999.000000
56959     56959     yunnan         100.6031       21.9492          152       122     2012      12        30        365              0.000000      15.456818       0.039702       0.251680   -9999.000000   -9999.000000       0.217500       0.182000
56959     56959     yunnan         100.6031       21.9492          152       122     2012      12        31        366              0.273000      15.728638       1.502155       0.251165   -9999.000000   -9999.000000   -9999.000000       0.223000
