# Supplementary material for: Research on Fusing Multisatellite Soil Moisture Data Based on Bayesian Model Averaging
Source: Hindawi journal article supplement (doi:10.1155/2018/9310838), 2018-06-25
Supplement: f1 [file 9310838.f1.zip › 2012_sm00-10cm_daily_ZDB_ZHY_56966_366days_allin.txt]

56966     56966     yunnan         101.8331       23.3500          147       127     2012      01        01        001              0.000000   -9999.000000       0.000000   -9999.000000   -9999.000000       0.030600   -9999.000000   -9999.000000
56966     56966     yunnan         101.8331       23.3500          147       127     2012      01        02        002              0.141208      16.130615       0.159146       0.239778   -9999.000000   -9999.000000   -9999.000000       0.216000
56966     56966     yunnan         101.8331       23.3500          147       127     2012      01        03        003              0.000000      17.307678       6.437627       0.239341       0.416000   -9999.000000       0.141700       0.344000
56966     56966     yunnan         101.8331       23.3500          147       127     2012      01        04        004              0.177474      18.054108       8.111973       0.245680       0.468000       0.072600       0.148900   -9999.000000
56966     56966     yunnan         101.8331       23.3500          147       127     2012      01        05        005              0.193087      16.241333       2.011184       0.287826       0.429000   -9999.000000   -9999.000000       0.246000
56966     56966     yunnan         101.8331       23.3500          147       127     2012      01        06        006              0.194500      16.001740       0.000000       0.274488   -9999.000000       0.067600   -9999.000000       0.412000
56966     56966     yunnan         101.8331       23.3500          147       127     2012      01        07        007              0.185045      16.245331       0.000000       0.264263   -9999.000000   -9999.000000   -9999.000000       0.275000
56966     56966     yunnan         101.8331       23.3500          147       127     2012      01        08        008              0.000000      16.334869       0.000000       0.258439   -9999.000000   -9999.000000       0.139600       0.313000
56966     56966     yunnan         101.8331       23.3500          147       127     2012      01        09        009              0.163238      15.959076       0.000000       0.254501       0.416500       0.080900       0.134700   -9999.000000
56966     56966     yunnan         101.8331       23.3500          147       127     2012      01        10        010              0.155783      16.269348       0.000000       0.252062       0.426000   -9999.000000   -9999.000000       0.085000
56966     56966     yunnan         101.8331       23.3500          147       127     2012      01        11        011              0.150500      16.008545       0.000000       0.250791       0.367500   -9999.000000   -9999.000000       0.205000
56966     56966     yunnan         101.8331       23.3500          147       127     2012      01        12        012              0.148435      16.488037       9.114274       0.249053   -9999.000000   -9999.000000   -9999.000000       0.240000
56966     56966     yunnan         101.8331       23.3500          147       127     2012      01        13        013              0.177292      15.056702       2.348302       0.262934   -9999.000000   -9999.000000   -9999.000000       0.537000
56966     56966     yunnan         101.8331       23.3500          147       127     2012      01        14        014              0.184167      15.232513       1.443305       0.283184       0.354000   -9999.000000       0.141500   -9999.000000
56966     56966     yunnan         101.8331       23.3500          147       127     2012      01        15        015              0.176708      15.758820       0.000000       0.274657       0.356500   -9999.000000       0.141700       0.010000
56966     56966     yunnan         101.8331       23.3500          147       127     2012      01        16        016              0.164375      15.014313       0.000000       0.263994       0.362500   -9999.000000       0.171100   -9999.000000
56966     56966     yunnan         101.8331       23.3500          147       127     2012      01        17        017              0.000000      14.524200       0.000000       0.259292   -9999.000000       0.042600   -9999.000000       0.290000
56966     56966     yunnan         101.8331       23.3500          147       127     2012      01        18        018              0.141250      14.955750       0.000000       0.255592   -9999.000000   -9999.000000   -9999.000000       0.173000
56966     56966     yunnan         101.8331       23.3500          147       127     2012      01        19        019              0.135583      14.999939       0.000000       0.252322       0.357500       0.034400       0.175500       0.005000
56966     56966     yunnan         101.8331       23.3500          147       127     2012      01        20        020              0.132417      14.790863       0.000000       0.250118       0.340000   -9999.000000       0.171300       0.264000
56966     56966     yunnan         101.8331       23.3500          147       127     2012      01        21        021              0.126625      15.010010       0.000000       0.248157       0.416000   -9999.000000       0.174500   -9999.000000
56966     56966     yunnan         101.8331       23.3500          147       127     2012      01        22        022              0.123417      15.248444       0.000000       0.246162   -9999.000000   -9999.000000   -9999.000000       0.146000
56966     56966     yunnan         101.8331       23.3500          147       127     2012      01        23        023              0.120833      15.252441       0.000000       0.244219   -9999.000000   -9999.000000   -9999.000000       0.143000
56966     56966     yunnan         101.8331       23.3500          147       127     2012      01        24        024              0.115542      15.502960       0.000000       0.242006       0.429000   -9999.000000   -9999.000000       0.089000
56966     56966     yunnan         101.8331       23.3500          147       127     2012      01        25        025              0.114208      15.732025       0.000000       0.239816       0.379500   -9999.000000       0.161900       0.158000
56966     56966     yunnan         101.8331       23.3500          147       127     2012      01        26        026              0.111708      15.601624       0.000000       0.238326       0.401500   -9999.000000       0.165700   -9999.000000
56966     56966     yunnan         101.8331       23.3500          147       127     2012      01        27        027              0.109708      15.675720       0.000000       0.236794   -9999.000000       0.079200       0.156000       0.181000
56966     56966     yunnan         101.8331       23.3500          147       127     2012      01        28        028              0.107625      15.996796       0.000000       0.235180   -9999.000000   -9999.000000   -9999.000000   -9999.000000
56966     56966     yunnan         101.8331       23.3500          147       127     2012      01        29        029              0.105875      16.239502       0.000000       0.233377   -9999.000000   -9999.000000   -9999.000000       0.090000
56966     56966     yunnan         101.8331       23.3500          147       127     2012      01        30        030              0.105750      16.549713       0.000000       0.231533       0.381500   -9999.000000   -9999.000000       0.142000
56966     56966     yunnan         101.8331       23.3500          147       127     2012      01        31        031              0.104174      17.407379       0.000000       0.229396       0.402500   -9999.000000       0.157200       0.031000
56966     56966     yunnan         101.8331       23.3500          147       127     2012      02        01        032              0.103217      17.653320       0.000000       0.228879       0.277000       0.064400       0.160900       0.144000
56966     56966     yunnan         101.8331       23.3500          147       127     2012      02        02        033              0.101875      18.029663       0.000000       0.226475   -9999.000000   -9999.000000   -9999.000000   -9999.000000
56966     56966     yunnan         101.8331       23.3500          147       127     2012      02        03        034              0.100125      17.623047       0.000000       0.223737   -9999.000000       0.026400   -9999.000000       0.027000
56966     56966     yunnan         101.8331       23.3500          147       127     2012      02        04        035              0.098792      17.255341       0.000000       0.221616       0.260000       0.051100   -9999.000000       0.170000
56966     56966     yunnan         101.8331       23.3500          147       127     2012      02        05        036              0.097417      17.342712       0.000000       0.219506       0.282000   -9999.000000       0.157200       0.162000
56966     56966     yunnan         101.8331       23.3500          147       127     2012      02        06        037              0.095522      17.800659       0.156647       0.217026       0.277000   -9999.000000       0.155900       0.144000
56966     56966     yunnan         101.8331       23.3500          147       127     2012      02        07        038              0.093708      17.878113       0.188970       0.214589   -9999.000000   -9999.000000       0.158300   -9999.000000
56966     56966     yunnan         101.8331       23.3500          147       127     2012      02        08        039              0.092417      17.674225       0.000000       0.212658   -9999.000000   -9999.000000   -9999.000000       0.056000
56966     56966     yunnan         101.8331       23.3500          147       127     2012      02        09        040              0.091417      18.143433       0.000000       0.210761       0.282000   -9999.000000   -9999.000000       0.163000
56966     56966     yunnan         101.8331       23.3500          147       127     2012      02        10        041              0.090292      18.455383       0.000000       0.208337       0.279000   -9999.000000   -9999.000000       0.081000
56966     56966     yunnan         101.8331       23.3500          147       127     2012      02        11        042              0.089417      18.676117       0.000000       0.205220       0.304000   -9999.000000       0.155300       0.122000
56966     56966     yunnan         101.8331       23.3500          147       127     2012      02        12        043              0.088917      18.689697       0.000000       0.202472   -9999.000000   -9999.000000       0.148600   -9999.000000
56966     56966     yunnan         101.8331       23.3500          147       127     2012      02        13        044              0.088625      18.812256       0.000000       0.199997   -9999.000000   -9999.000000       0.144100       0.120000
56966     56966     yunnan         101.8331       23.3500          147       127     2012      02        14        045              0.098167      18.725494       0.307455       0.197050       0.294000   -9999.000000   -9999.000000   -9999.000000
56966     56966     yunnan         101.8331       23.3500          147       127     2012      02        15        046              0.100087      18.906647       0.482840       0.194241       0.254500   -9999.000000   -9999.000000       0.180000
56966     56966     yunnan         101.8331       23.3500          147       127     2012      02        16        047              0.099917      18.932556       0.000000       0.191033       0.268000   -9999.000000   -9999.000000       0.140000
56966     56966     yunnan         101.8331       23.3500          147       127     2012      02        17        048              0.100042      19.289856       0.000000       0.187970       0.275000   -9999.000000       0.151100       0.109000
56966     56966     yunnan         101.8331       23.3500          147       127     2012      02        18        049              0.099875      19.846008       0.000000       0.185065   -9999.000000   -9999.000000       0.155000       0.225000
56966     56966     yunnan         101.8331       23.3500          147       127     2012      02        19        050              0.099083      20.624786       1.298740       0.182365   -9999.000000       0.055400   -9999.000000   -9999.000000
56966     56966     yunnan         101.8331       23.3500          147       127     2012      02        20        051              0.099375      19.772736       0.115351       0.181761       0.289500   -9999.000000   -9999.000000       0.003000
56966     56966     yunnan         101.8331       23.3500          147       127     2012      02        21        052              0.099250      19.287872       7.193219       0.182987       0.245500   -9999.000000   -9999.000000       0.059000
56966     56966     yunnan         101.8331       23.3500          147       127     2012      02        22        053              0.098333      20.344086       0.000000       0.181339       0.248000   -9999.000000       0.141500       0.053000
56966     56966     yunnan         101.8331       23.3500          147       127     2012      02        23        054              0.097091      20.443024       0.284847       0.176804   -9999.000000   -9999.000000       0.139500       0.158000
56966     56966     yunnan         101.8331       23.3500          147       127     2012      02        24        055              0.096286      20.407135       1.116642       0.175241   -9999.000000       0.057100       0.139400   -9999.000000
56966     56966     yunnan         101.8331       23.3500          147       127     2012      02        25        056              0.095091      20.473572       0.000000       0.180106       0.217500   -9999.000000   -9999.000000       0.149000
56966     56966     yunnan         101.8331       23.3500          147       127     2012      02        26        057              0.093950      20.351685       0.000000       0.175607       0.230500       0.073500   -9999.000000   -9999.000000
56966     56966     yunnan         101.8331       23.3500          147       127     2012      02        27        058              0.092737      20.574707       0.335626       0.167820       0.241500   -9999.000000   -9999.000000       0.064000
56966     56966     yunnan         101.8331       23.3500          147       127     2012      02        28        059              0.092333      20.580688       0.000000       0.163265   -9999.000000   -9999.000000       0.120500       0.096000
56966     56966     yunnan         101.8331       23.3500          147       127     2012      02        29        060              0.000000   -9999.000000       0.388588   -9999.000000   -9999.000000       0.129100   -9999.000000   -9999.000000
56966     56966     yunnan         101.8331       23.3500          147       127     2012      03        01        061              0.090526      21.027100       0.000000       0.159138       0.210000   -9999.000000       0.122900       0.034000
56966     56966     yunnan         101.8331       23.3500          147       127     2012      03        02        062              0.090500      21.149689       0.183333       0.156004       0.223000   -9999.000000   -9999.000000   -9999.000000
56966     56966     yunnan         101.8331       23.3500          147       127     2012      03        03        063              0.092292      21.168488      10.603008       0.154584       0.226500   -9999.000000   -9999.000000   -9999.000000
56966     56966     yunnan         101.8331       23.3500          147       127     2012      03        04        064              0.111091      19.998566       5.023767       0.189001   -9999.000000   -9999.000000   -9999.000000       0.454000
56966     56966     yunnan         101.8331       23.3500          147       127     2012      03        05        065              0.114500      17.356842       0.000000       0.263222   -9999.000000       0.019000       0.139600       0.096000
56966     56966     yunnan         101.8331       23.3500          147       127     2012      03        06        066              0.109824      18.509308       0.000000       0.235561   -9999.000000   -9999.000000       0.139800       0.120000
56966     56966     yunnan         101.8331       23.3500          147       127     2012      03        07        067              0.000000      17.957672       0.000000       0.225670       0.207500   -9999.000000   -9999.000000   -9999.000000
56966     56966     yunnan         101.8331       23.3500          147       127     2012      03        08        068              0.106625      19.660370       0.366382       0.215797       0.213500   -9999.000000   -9999.000000       0.016000
56966     56966     yunnan         101.8331       23.3500          147       127     2012      03        09        069              0.104500      20.398438       0.000000       0.206875       0.224000   -9999.000000   -9999.000000       0.067000
56966     56966     yunnan         101.8331       23.3500          147       127     2012      03        10        070              0.102550      20.979004       0.000000       0.198503   -9999.000000   -9999.000000       0.135800       0.085000
56966     56966     yunnan         101.8331       23.3500          147       127     2012      03        11        071              0.101900      21.110321       0.000000       0.191562   -9999.000000       0.053600       0.137500       0.040000
56966     56966     yunnan         101.8331       23.3500          147       127     2012      03        12        072              0.100565      22.181030       0.214640       0.185079       0.177500   -9999.000000       0.111100   -9999.000000
56966     56966     yunnan         101.8331       23.3500          147       127     2012      03        13        073              0.099632      22.998657       0.000000       0.178476       0.185500   -9999.000000   -9999.000000       0.133000
56966     56966     yunnan         101.8331       23.3500          147       127     2012      03        14        074              0.097909      23.260071       0.000000       0.171246       0.180500   -9999.000000   -9999.000000   -9999.000000
56966     56966     yunnan         101.8331       23.3500          147       127     2012      03        15        075              0.096857      22.460846       0.000000       0.166106   -9999.000000       0.067400   -9999.000000       0.130000
56966     56966     yunnan         101.8331       23.3500          147       127     2012      03        16        076              0.096292      23.269836       0.000000       0.161026   -9999.000000   -9999.000000       0.113400       0.141000
56966     56966     yunnan         101.8331       23.3500          147       127     2012      03        17        077              0.094750      23.192657       0.504956       0.156211       0.169500   -9999.000000       0.116700   -9999.000000
56966     56966     yunnan         101.8331       23.3500          147       127     2012      03        18        078              0.094083      22.453003       0.000000       0.152706       0.180000       0.136000       0.108500       0.216000
56966     56966     yunnan         101.8331       23.3500          147       127     2012      03        19        079              0.092958      22.438934       0.000000       0.149751       0.183000   -9999.000000   -9999.000000   -9999.000000
56966     56966     yunnan         101.8331       23.3500          147       127     2012      03        20        080              0.093042      22.632263       0.000000       0.147904   -9999.000000   -9999.000000   -9999.000000       0.175000
56966     56966     yunnan         101.8331       23.3500          147       127     2012      03        21        081              0.092875      23.757782       0.192708       0.145699   -9999.000000   -9999.000000   -9999.000000       0.044000
56966     56966     yunnan         101.8331       23.3500          147       127     2012      03        22        082              0.092917      24.221985       0.000000       0.143765       0.182000   -9999.000000       0.099800       0.026000
56966     56966     yunnan         101.8331       23.3500          147       127     2012      03        23        083              0.093458      24.123169       0.000000       0.142826       0.163500       0.009300       0.102500       0.183000
56966     56966     yunnan         101.8331       23.3500          147       127     2012      03        24        084              0.090667      25.333191       0.171094       0.139777       0.186000   -9999.000000   -9999.000000   -9999.000000
56966     56966     yunnan         101.8331       23.3500          147       127     2012      03        25        085              0.000000      22.211182       0.141029       0.139931   -9999.000000   -9999.000000   -9999.000000   -9999.000000
56966     56966     yunnan         101.8331       23.3500          147       127     2012      03        26        086              0.092250      21.415039       0.000000       0.142852   -9999.000000       0.088400   -9999.000000   -9999.000000
56966     56966     yunnan         101.8331       23.3500          147       127     2012      03        27        087              0.091542      21.916779       0.000000       0.143570   -9999.000000   -9999.000000       0.085700   -9999.000000
56966     56966     yunnan         101.8331       23.3500          147       127     2012      03        28        088              0.091417      22.850739       0.000000       0.142327       0.165500   -9999.000000       0.089200       0.001000
56966     56966     yunnan         101.8331       23.3500          147       127     2012      03        29        089              0.090917      25.094666       0.035426       0.138742       0.174500       0.002500       0.082000   -9999.000000
56966     56966     yunnan         101.8331       23.3500          147       127     2012      03        30        090              0.089083      25.811066       0.000000       0.134601       0.175000   -9999.000000   -9999.000000   -9999.000000
56966     56966     yunnan         101.8331       23.3500          147       127     2012      03        31        091              0.087708      26.152252       0.000000       0.131053   -9999.000000   -9999.000000   -9999.000000   -9999.000000
56966     56966     yunnan         101.8331       23.3500          147       127     2012      04        01        092              0.087708      23.750366       0.000000       0.130341   -9999.000000   -9999.000000   -9999.000000   -9999.000000
56966     56966     yunnan         101.8331       23.3500          147       127     2012      04        02        093              0.088750      24.433380       0.000000       0.130525       0.144000       0.023400       0.089600       0.018000
56966     56966     yunnan         101.8331       23.3500          147       127     2012      04        03        094              0.079917      26.652222       0.000000       0.128555       0.152000   -9999.000000       0.090700       0.028000
56966     56966     yunnan         101.8331       23.3500          147       127     2012      04        04        095              0.081875      26.040619       0.000000       0.127023       0.151500   -9999.000000       0.084800       0.055000
56966     56966     yunnan         101.8331       23.3500          147       127     2012      04        05        096              0.083250      26.596985       0.000000       0.125566   -9999.000000   -9999.000000   -9999.000000   -9999.000000
56966     56966     yunnan         101.8331       23.3500          147       127     2012      04        06        097              0.085250      26.716156       5.672288       0.124868   -9999.000000   -9999.000000   -9999.000000   -9999.000000
56966     56966     yunnan         101.8331       23.3500          147       127     2012      04        07        098              0.096333      25.758789      14.807268       0.152816   -9999.000000   -9999.000000   -9999.000000       0.357000
56966     56966     yunnan         101.8331       23.3500          147       127     2012      04        08        099              0.120875      22.957825      11.973392       0.269482       0.188000   -9999.000000       0.100800       0.449000
56966     56966     yunnan         101.8331       23.3500          147       127     2012      04        09        100              0.122250      21.049927       0.113682       0.283159       0.171000   -9999.000000       0.118800       0.517000
56966     56966     yunnan         101.8331       23.3500          147       127     2012      04        10        101              0.117750      22.079926       0.268975       0.247699   -9999.000000       0.035600   -9999.000000   -9999.000000
56966     56966     yunnan         101.8331       23.3500          147       127     2012      04        11        102              0.115917      22.189911       2.204208       0.234390   -9999.000000   -9999.000000   -9999.000000       0.150000
56966     56966     yunnan         101.8331       23.3500          147       127     2012      04        12        103              0.113333      22.479462       0.000000       0.236922       0.183000   -9999.000000   -9999.000000   -9999.000000
56966     56966     yunnan         101.8331       23.3500          147       127     2012      04        13        104              0.108458      22.412231       0.000000       0.223152       0.166000       0.050200       0.108400       0.077000
56966     56966     yunnan         101.8331       23.3500          147       127     2012      04        14        105              0.103250      23.670044       0.000000       0.208344       0.174000   -9999.000000       0.109200       0.222000
56966     56966     yunnan         101.8331       23.3500          147       127     2012      04        15        106              0.098083      24.749573       0.000000       0.193953       0.162000   -9999.000000       0.103800       0.050000
56966     56966     yunnan         101.8331       23.3500          147       127     2012      04        16        107              0.095000      25.037567       0.000000       0.180518   -9999.000000   -9999.000000   -9999.000000       0.261000
56966     56966     yunnan         101.8331       23.3500          147       127     2012      04        17        108              0.091875      25.291565       0.000000       0.169809   -9999.000000   -9999.000000   -9999.000000   -9999.000000
56966     56966     yunnan         101.8331       23.3500          147       127     2012      04        18        109              0.090042      25.472992       0.000000       0.160570       0.157000   -9999.000000   -9999.000000       0.078000
56966     56966     yunnan         101.8331       23.3500          147       127     2012      04        19        110              0.091917      26.304626       0.000000       0.151975       0.167500   -9999.000000       0.084200       0.121000
56966     56966     yunnan         101.8331       23.3500          147       127     2012      04        20        111              0.091583      26.296539       1.138467       0.146343       0.170500       0.004500       0.086400       0.105000
56966     56966     yunnan         101.8331       23.3500          147       127     2012      04        21        112              0.090917      26.000519       2.257031       0.152923   -9999.000000       0.002700       0.079400       0.105000
56966     56966     yunnan         101.8331       23.3500          147       127     2012      04        22        113              0.100125      25.627502       8.113770       0.150386   -9999.000000   -9999.000000   -9999.000000   -9999.000000
56966     56966     yunnan         101.8331       23.3500          147       127     2012      04        23        114              0.105542      24.885559       0.000000       0.215966       0.145500   -9999.000000   -9999.000000       0.190000
56966     56966     yunnan         101.8331       23.3500          147       127     2012      04        24        115              0.100458      25.159698       0.000000       0.199119       0.157000   -9999.000000   -9999.000000   -9999.000000
56966     56966     yunnan         101.8331       23.3500          147       127     2012      04        25        116              0.000000      25.867340       0.202511       0.175138       0.148000   -9999.000000       0.115800       0.133000
56966     56966     yunnan         101.8331       23.3500          147       127     2012      04        26        117              0.121250      26.073425       0.082715       0.162910   -9999.000000   -9999.000000       0.116800       0.147000
56966     56966     yunnan         101.8331       23.3500          147       127     2012      04        27        118              0.121708      26.377960       0.000000       0.153001   -9999.000000   -9999.000000   -9999.000000   -9999.000000
56966     56966     yunnan         101.8331       23.3500          147       127     2012      04        28        119              0.121625      26.538818       0.456836       0.144984       0.139500   -9999.000000   -9999.000000       0.045000
56966     56966     yunnan         101.8331       23.3500          147       127     2012      04        29        120              0.121375      26.892029       0.000000       0.138959       0.149500   -9999.000000   -9999.000000   -9999.000000
56966     56966     yunnan         101.8331       23.3500          147       127     2012      04        30        121              0.121125      26.947021       0.000000       0.134014       0.150500   -9999.000000       0.105900       0.014000
56966     56966     yunnan         101.8331       23.3500          147       127     2012      05        01        122              0.121792      26.815155       0.000000       0.130436   -9999.000000       0.057200       0.107300       0.113000
56966     56966     yunnan         101.8331       23.3500          147       127     2012      05        02        123              0.121625      27.816772       0.000000       0.127031   -9999.000000   -9999.000000       0.101000       0.053000
56966     56966     yunnan         101.8331       23.3500          147       127     2012      05        03        124              0.121833      27.708221       0.000000       0.124611   -9999.000000   -9999.000000   -9999.000000       0.072000
56966     56966     yunnan         101.8331       23.3500          147       127     2012      05        04        125              0.122042      28.329773       0.000000       0.122774       0.163500   -9999.000000   -9999.000000   -9999.000000
56966     56966     yunnan         101.8331       23.3500          147       127     2012      05        05        126              0.121042      29.506226       0.275211       0.121049       0.184500   -9999.000000   -9999.000000       0.013000
56966     56966     yunnan         101.8331       23.3500          147       127     2012      05        06        127              0.121208      28.380676      10.557996       0.123092       0.209500       0.103900       0.123100       0.406000
56966     56966     yunnan         101.8331       23.3500          147       127     2012      05        07        128              0.142292      24.782684      35.173561       0.187840   -9999.000000   -9999.000000       0.111900       0.981000
56966     56966     yunnan         101.8331       23.3500          147       127     2012      05        08        129              0.208375      23.148285      17.518688       0.307831   -9999.000000       0.120300   -9999.000000       1.000000
56966     56966     yunnan         101.8331       23.3500          147       127     2012      05        09        130              0.220208      23.506592       0.466873       0.310268       0.176000       0.101700   -9999.000000   -9999.000000
56966     56966     yunnan         101.8331       23.3500          147       127     2012      05        10        131              0.217000      25.953674       0.196570       0.273058       0.212000   -9999.000000   -9999.000000       0.342000
56966     56966     yunnan         101.8331       23.3500          147       127     2012      05        11        132              0.213667      25.719543       0.000000       0.260665       0.199000       0.201900       0.101400   -9999.000000
56966     56966     yunnan         101.8331       23.3500          147       127     2012      05        12        133              0.204292      26.551941       2.464383       0.247623   -9999.000000   -9999.000000       0.102100       0.288000
56966     56966     yunnan         101.8331       23.3500          147       127     2012      05        13        134              0.196083      26.545776       0.018456       0.236286   -9999.000000   -9999.000000       0.100200       0.240000
56966     56966     yunnan         101.8331       23.3500          147       127     2012      05        14        135              0.190000      26.615662       0.000000       0.226519       0.187500       0.163700   -9999.000000       0.243000
56966     56966     yunnan         101.8331       23.3500          147       127     2012      05        15        136              0.186250      27.579559       0.941593       0.215061       0.189000   -9999.000000   -9999.000000       0.312000
56966     56966     yunnan         101.8331       23.3500          147       127     2012      05        16        137              0.179250      27.096466       0.000000       0.214827       0.196000       0.031200   -9999.000000   -9999.000000
56966     56966     yunnan         101.8331       23.3500          147       127     2012      05        17        138              0.188083      27.427521      21.164370       0.202405   -9999.000000   -9999.000000       0.124200       0.184000
56966     56966     yunnan         101.8331       23.3500          147       127     2012      05        18        139              0.227000      27.242035       0.000000       0.252516   -9999.000000   -9999.000000       0.117300       0.613000
56966     56966     yunnan         101.8331       23.3500          147       127     2012      05        19        140              0.221375      26.327667       0.000000       0.274676       0.168000       0.151100       0.109200       0.323000
56966     56966     yunnan         101.8331       23.3500          147       127     2012      05        20        141              0.210833      27.670532       2.657428       0.243934       0.146000   -9999.000000   -9999.000000       0.435000
56966     56966     yunnan         101.8331       23.3500          147       127     2012      05        21        142              0.201500      27.955048       7.193543       0.239626       0.221000       0.080700   -9999.000000   -9999.000000
56966     56966     yunnan         101.8331       23.3500          147       127     2012      05        22        143              0.197667      27.362122      20.190596       0.254965   -9999.000000   -9999.000000   -9999.000000       0.702000
56966     56966     yunnan         101.8331       23.3500          147       127     2012      05        23        144              0.196708      27.183228       0.000000       0.292522   -9999.000000   -9999.000000       0.113600   -9999.000000
56966     56966     yunnan         101.8331       23.3500          147       127     2012      05        24        145              0.195625      27.264557      11.590608       0.265063   -9999.000000       0.062700       0.099900       0.260000
56966     56966     yunnan         101.8331       23.3500          147       127     2012      05        25        146              0.000000      27.989227       8.946093       0.259994       0.199500   -9999.000000   -9999.000000       0.706000
56966     56966     yunnan         101.8331       23.3500          147       127     2012      05        26        147              0.196375      26.464996      12.640909       0.299163       0.232000       0.107500   -9999.000000       0.866000
56966     56966     yunnan         101.8331       23.3500          147       127     2012      05        27        148              0.216500      24.808838       3.850794       0.299612       0.230000       0.185600   -9999.000000       0.817000
56966     56966     yunnan         101.8331       23.3500          147       127     2012      05        28        149              0.253500      25.677490      14.848223       0.287655   -9999.000000   -9999.000000   -9999.000000   -9999.000000
56966     56966     yunnan         101.8331       23.3500          147       127     2012      05        29        150              0.267583      25.994507      45.791721       0.300490   -9999.000000       0.471700       0.118000   -9999.000000
56966     56966     yunnan         101.8331       23.3500          147       127     2012      05        30        151              0.268958      25.005615       4.469515       0.333290       0.236000   -9999.000000       0.131300   -9999.000000
56966     56966     yunnan         101.8331       23.3500          147       127     2012      05        31        152              0.262000      23.491943       5.302450       0.306536       0.249000   -9999.000000   -9999.000000   -9999.000000
56966     56966     yunnan         101.8331       23.3500          147       127     2012      06        01        153              0.262042      23.828156      10.244237       0.295732       0.214500   -9999.000000   -9999.000000       0.790000
56966     56966     yunnan         101.8331       23.3500          147       127     2012      06        02        154              0.286083      25.333527      25.257803       0.302321   -9999.000000   -9999.000000   -9999.000000   -9999.000000
56966     56966     yunnan         101.8331       23.3500          147       127     2012      06        03        155              0.286708      24.871948      19.827246       0.327812   -9999.000000       0.275500       0.122000       0.855000
56966     56966     yunnan         101.8331       23.3500          147       127     2012      06        04        156              0.283417      24.823761      14.203217       0.322107       0.191500   -9999.000000       0.103800       0.908000
56966     56966     yunnan         101.8331       23.3500          147       127     2012      06        05        157              0.275083      26.365112       0.000000       0.315730       0.187000   -9999.000000       0.097000       0.650000
56966     56966     yunnan         101.8331       23.3500          147       127     2012      06        06        158              0.262833      27.489166      16.316948       0.295518       0.184500       0.159200   -9999.000000       0.686000
56966     56966     yunnan         101.8331       23.3500          147       127     2012      06        07        159              0.249958      27.915924       0.841357       0.280622   -9999.000000   -9999.000000   -9999.000000   -9999.000000
56966     56966     yunnan         101.8331       23.3500          147       127     2012      06        08        160              0.242083      28.030151      21.860525       0.271670   -9999.000000       0.112200   -9999.000000       0.681000
56966     56966     yunnan         101.8331       23.3500          147       127     2012      06        09        161              0.284542      26.002808       5.153158       0.300066       0.207000   -9999.000000       0.104500   -9999.000000
56966     56966     yunnan         101.8331       23.3500          147       127     2012      06        10        162              0.288435      26.209442       3.740427       0.307980       0.206000   -9999.000000       0.106200       0.734000
56966     56966     yunnan         101.8331       23.3500          147       127     2012      06        11        163              0.000000      25.259583       3.288639       0.296147       0.179500       0.147200   -9999.000000       0.702000
56966     56966     yunnan         101.8331       23.3500          147       127     2012      06        12        164              0.283708      26.001160       3.275462       0.289492       0.185000   -9999.000000   -9999.000000       0.616000
56966     56966     yunnan         101.8331       23.3500          147       127     2012      06        13        165              0.285042      26.268951       0.833417       0.283454   -9999.000000       0.112500   -9999.000000       0.813000
56966     56966     yunnan         101.8331       23.3500          147       127     2012      06        14        166              0.299292      26.081848      31.427525       0.278760   -9999.000000       0.132400       0.096600   -9999.000000
56966     56966     yunnan         101.8331       23.3500          147       127     2012      06        15        167              0.312708      26.491638       6.555591       0.296589       0.183000   -9999.000000       0.110200       0.659000
56966     56966     yunnan         101.8331       23.3500          147       127     2012      06        16        168              0.290625      25.041168       1.309471       0.311792       0.182000       0.306100       0.103700       0.752000
56966     56966     yunnan         101.8331       23.3500          147       127     2012      06        17        169              0.286958      25.461273       0.546837       0.289505       0.179000   -9999.000000   -9999.000000       0.576000
56966     56966     yunnan         101.8331       23.3500          147       127     2012      06        18        170              0.287208      25.889160      10.062254       0.282574   -9999.000000   -9999.000000   -9999.000000       0.776000
56966     56966     yunnan         101.8331       23.3500          147       127     2012      06        19        171              0.316625      26.753693      35.067688       0.295488   -9999.000000       0.018500   -9999.000000   -9999.000000
56966     56966     yunnan         101.8331       23.3500          147       127     2012      06        20        172              0.313833      25.935272       2.959360       0.318399       0.195500   -9999.000000       0.070300       0.657000
56966     56966     yunnan         101.8331       23.3500          147       127     2012      06        21        173              0.307958      25.269745       5.457624       0.310066       0.224000   -9999.000000       0.070400   -9999.000000
56966     56966     yunnan         101.8331       23.3500          147       127     2012      06        22        174              0.303542      25.709045       0.475023       0.300847       0.224000   -9999.000000       0.064700       0.672000
56966     56966     yunnan         101.8331       23.3500          147       127     2012      06        23        175              0.298417      25.492981       2.037026       0.289403   -9999.000000   -9999.000000   -9999.000000       0.828000
56966     56966     yunnan         101.8331       23.3500          147       127     2012      06        24        176              0.297583      25.088074       1.500270       0.283570   -9999.000000       0.326700   -9999.000000       0.631000
56966     56966     yunnan         101.8331       23.3500          147       127     2012      06        25        177              0.294042      24.454163       0.192662       0.284257       0.210500   -9999.000000   -9999.000000       0.659000
56966     56966     yunnan         101.8331       23.3500          147       127     2012      06        26        178              0.289333      24.915802       0.303150       0.275740       0.223000       0.172100       0.111700   -9999.000000
56966     56966     yunnan         101.8331       23.3500          147       127     2012      06        27        179              0.283083      24.737793       0.083696       0.272131       0.205500   -9999.000000       0.112800       0.466000
56966     56966     yunnan         101.8331       23.3500          147       127     2012      06        28        180              0.269042      25.283539       4.120306       0.267686   -9999.000000   -9999.000000   -9999.000000       0.614000
56966     56966     yunnan         101.8331       23.3500          147       127     2012      06        29        181              0.251500      25.565704       0.275506       0.274305   -9999.000000       0.204200   -9999.000000   -9999.000000
56966     56966     yunnan         101.8331       23.3500          147       127     2012      06        30        182              0.235708      26.067596       1.762038       0.270076       0.215000   -9999.000000   -9999.000000   -9999.000000
56966     56966     yunnan         101.8331       23.3500          147       127     2012      07        01        183              0.262125      27.016296       8.014437       0.264191       0.117000       0.176400       0.112600   -9999.000000
56966     56966     yunnan         101.8331       23.3500          147       127     2012      07        02        184              0.314583      25.451355       0.968908       0.289929       0.119000       0.064300       0.147000       0.551000
56966     56966     yunnan         101.8331       23.3500          147       127     2012      07        03        185              0.312792      25.779449       4.545619       0.275091       0.119000   -9999.000000       0.136600       0.669000
56966     56966     yunnan         101.8331       23.3500          147       127     2012      07        04        186              0.317000      25.978699       8.615071       0.281921   -9999.000000       0.322200   -9999.000000       0.713000
56966     56966     yunnan         101.8331       23.3500          147       127     2012      07        05        187              0.316208      25.484802       2.166608       0.287495   -9999.000000   -9999.000000   -9999.000000       0.751000
56966     56966     yunnan         101.8331       23.3500          147       127     2012      07        06        188              0.320375      25.971863       9.264216       0.286174   -9999.000000   -9999.000000   -9999.000000   -9999.000000
56966     56966     yunnan         101.8331       23.3500          147       127     2012      07        07        189              0.304500      25.977234       0.673242       0.297845   -9999.000000       0.033400       0.137500       0.466000
56966     56966     yunnan         101.8331       23.3500          147       127     2012      07        08        190              0.293542      26.548920       4.312251       0.278737       0.128000   -9999.000000       0.141100   -9999.000000
56966     56966     yunnan         101.8331       23.3500          147       127     2012      07        09        191              0.280167      25.812531       4.244949       0.285328   -9999.000000       0.251600       0.087000       0.673000
56966     56966     yunnan         101.8331       23.3500          147       127     2012      07        10        192              0.259250      25.873535       6.080801       0.283216   -9999.000000   -9999.000000   -9999.000000       0.825000
56966     56966     yunnan         101.8331       23.3500          147       127     2012      07        11        193              0.232083      26.514465       0.165674       0.286283       0.173000   -9999.000000   -9999.000000       0.563000
56966     56966     yunnan         101.8331       23.3500          147       127     2012      07        12        194              0.222167      26.604126       0.473744       0.280451       0.179500       0.039500   -9999.000000       0.667000
56966     56966     yunnan         101.8331       23.3500          147       127     2012      07        13        195              0.242750      26.878296      14.382200       0.270836   -9999.000000   -9999.000000       0.091700   -9999.000000
56966     56966     yunnan         101.8331       23.3500          147       127     2012      07        14        196              0.303000      25.638550      15.114520       0.300215   -9999.000000       0.152900       0.094300       0.870000
56966     56966     yunnan         101.8331       23.3500          147       127     2012      07        15        197              0.311250      24.039398       3.991895       0.314065   -9999.000000   -9999.000000   -9999.000000       0.716000
56966     56966     yunnan         101.8331       23.3500          147       127     2012      07        16        198              0.318458      24.687561       7.532442       0.298234   -9999.000000   -9999.000000   -9999.000000       0.965000
56966     56966     yunnan         101.8331       23.3500          147       127     2012      07        17        199              0.330500      24.523590      18.315346       0.299870       0.218000       0.201200   -9999.000000       1.000000
56966     56966     yunnan         101.8331       23.3500          147       127     2012      07        18        200              0.349542      23.975006      30.131233       0.317888       0.216000   -9999.000000       0.075600   -9999.000000
56966     56966     yunnan         101.8331       23.3500          147       127     2012      07        19        201              0.322875      24.110992       6.650801       0.333949       0.202000       0.292200       0.076600       0.846000
56966     56966     yunnan         101.8331       23.3500          147       127     2012      07        20        202              0.313583      24.878418       3.748603       0.311662   -9999.000000       0.096200       0.068100   -9999.000000
56966     56966     yunnan         101.8331       23.3500          147       127     2012      07        21        203              0.302091      25.674225       7.845023       0.302998   -9999.000000   -9999.000000   -9999.000000       0.800000
56966     56966     yunnan         101.8331       23.3500          147       127     2012      07        22        204              0.302417      25.747101       4.253761       0.305635       0.229500       0.254800   -9999.000000       0.766000
56966     56966     yunnan         101.8331       23.3500          147       127     2012      07        23        205              0.325375      24.724426      15.104139       0.297941       0.234000   -9999.000000   -9999.000000       1.000000
56966     56966     yunnan         101.8331       23.3500          147       127     2012      07        24        206              0.316083      24.250275       5.231438       0.317409       0.217500   -9999.000000       0.108200       0.836000
56966     56966     yunnan         101.8331       23.3500          147       127     2012      07        25        207              0.316250      25.504425       3.707876       0.303890   -9999.000000       0.061600       0.110800   -9999.000000
56966     56966     yunnan         101.8331       23.3500          147       127     2012      07        26        208              0.327364      24.532776       8.386068       0.301920   -9999.000000   -9999.000000   -9999.000000       0.839000
56966     56966     yunnan         101.8331       23.3500          147       127     2012      07        27        209              0.325870      24.230438       3.818701       0.307637       0.229500       0.188900   -9999.000000       0.855000
56966     56966     yunnan         101.8331       23.3500          147       127     2012      07        28        210              0.341958      24.604950      37.353779       0.300864       0.232500   -9999.000000   -9999.000000       1.000000
56966     56966     yunnan         101.8331       23.3500          147       127     2012      07        29        211              0.342417      23.439545       9.844549       0.331057       0.248000   -9999.000000       0.109300       0.920000
56966     56966     yunnan         101.8331       23.3500          147       127     2012      07        30        212              0.334611      24.319305      34.704220       0.323632       0.205000       0.334300       0.154700   -9999.000000
56966     56966     yunnan         101.8331       23.3500          147       127     2012      07        31        213              0.335833      25.786163      21.958380       0.331356   -9999.000000   -9999.000000       0.154500       0.712000
56966     56966     yunnan         101.8331       23.3500          147       127     2012      08        01        214              0.337542      25.808014      10.245704       0.333379   -9999.000000       0.180300   -9999.000000       0.750000
56966     56966     yunnan         101.8331       23.3500          147       127     2012      08        02        215              0.336917      25.210968      25.883797       0.334734       0.295000   -9999.000000   -9999.000000       0.850000
56966     56966     yunnan         101.8331       23.3500          147       127     2012      08        03        216              0.326917      25.121002       0.813524       0.349432       0.270000   -9999.000000   -9999.000000       0.797000
56966     56966     yunnan         101.8331       23.3500          147       127     2012      08        04        217              0.312500      25.842865       0.000000       0.326150       0.263500       0.214700       0.144200   -9999.000000
56966     56966     yunnan         101.8331       23.3500          147       127     2012      08        05        218              0.303792      26.525940      28.053043       0.311466   -9999.000000   -9999.000000       0.149800       0.526000
56966     56966     yunnan         101.8331       23.3500          147       127     2012      08        06        219              0.331208      26.609192      15.223357       0.319823   -9999.000000       0.220100       0.125300   -9999.000000
56966     56966     yunnan         101.8331       23.3500          147       127     2012      08        07        220              0.332000      25.292206       3.692693       0.332228       0.267500       0.135300   -9999.000000       0.902000
56966     56966     yunnan         101.8331       23.3500          147       127     2012      08        08        221              0.325667      25.403656       0.250476       0.320064       0.277000   -9999.000000   -9999.000000       0.702000
56966     56966     yunnan         101.8331       23.3500          147       127     2012      08        09        222              0.308565      25.579285       0.626827       0.309651       0.254500       0.166800   -9999.000000       0.566000
56966     56966     yunnan         101.8331       23.3500          147       127     2012      08        10        223              0.275792      25.888977       0.000000       0.302834   -9999.000000   -9999.000000       0.141400       0.769000
56966     56966     yunnan         101.8331       23.3500          147       127     2012      08        11        224              0.243333      26.244476       1.940893       0.296478   -9999.000000       0.120900       0.141000   -9999.000000
56966     56966     yunnan         101.8331       23.3500          147       127     2012      08        12        225              0.220958      27.023254       7.865064       0.290881   -9999.000000   -9999.000000   -9999.000000       0.578000
56966     56966     yunnan         101.8331       23.3500          147       127     2012      08        13        226              0.211042      27.166016       2.107936       0.294941       0.256000   -9999.000000   -9999.000000       0.452000
56966     56966     yunnan         101.8331       23.3500          147       127     2012      08        14        227              0.212958      25.807556       5.106015       0.300530       0.244000       0.262800   -9999.000000       0.532000
56966     56966     yunnan         101.8331       23.3500          147       127     2012      08        15        228              0.212667      26.116913       3.898381       0.298546       0.275000   -9999.000000       0.153400       0.671000
56966     56966     yunnan         101.8331       23.3500          147       127     2012      08        16        229              0.212708      26.398407       2.192363       0.298477   -9999.000000   -9999.000000       0.148700   -9999.000000
56966     56966     yunnan         101.8331       23.3500          147       127     2012      08        17        230              0.212458      26.487640       1.904726       0.296031   -9999.000000       0.101700       0.148400       0.544000
56966     56966     yunnan         101.8331       23.3500          147       127     2012      08        18        231              0.229125      26.921936      16.465588       0.290113       0.354000   -9999.000000   -9999.000000   -9999.000000
56966     56966     yunnan         101.8331       23.3500          147       127     2012      08        19        232              0.306500      24.844910       6.864147       0.306919       0.292000       0.259200   -9999.000000       0.744000
56966     56966     yunnan         101.8331       23.3500          147       127     2012      08        20        233              0.299792      24.506348       0.113993       0.313232       0.282500   -9999.000000   -9999.000000       0.679000
56966     56966     yunnan         101.8331       23.3500          147       127     2012      08        21        234              0.293833      25.299164       7.145175       0.294810   -9999.000000   -9999.000000       0.104600   -9999.000000
56966     56966     yunnan         101.8331       23.3500          147       127     2012      08        22        235              0.305167      25.873138       1.456709       0.294609   -9999.000000       0.170900       0.110500   -9999.000000
56966     56966     yunnan         101.8331       23.3500          147       127     2012      08        23        236              0.294458      24.523682       0.000000       0.299538       0.292000   -9999.000000       0.103600   -9999.000000
56966     56966     yunnan         101.8331       23.3500          147       127     2012      08        24        237              0.281583      24.507965       0.953831       0.290481       0.228000       0.203700   -9999.000000   -9999.000000
56966     56966     yunnan         101.8331       23.3500          147       127     2012      08        25        238              0.000000      24.945953       0.892288       0.287182       0.294000   -9999.000000   -9999.000000   -9999.000000
56966     56966     yunnan         101.8331       23.3500          147       127     2012      08        26        239              0.287542      24.518890       2.554124       0.288892       0.274000   -9999.000000   -9999.000000       0.640000
56966     56966     yunnan         101.8331       23.3500          147       127     2012      08        27        240              0.299125      24.905182       0.587397       0.289982   -9999.000000       0.221900       0.101700       0.603000
56966     56966     yunnan         101.8331       23.3500          147       127     2012      08        28        241              0.288917      24.884827       1.507340       0.286410   -9999.000000   -9999.000000       0.100500   -9999.000000
56966     56966     yunnan         101.8331       23.3500          147       127     2012      08        29        242              0.268542      25.696106       0.000000       0.283692       0.260000       0.091900   -9999.000000       0.524000
56966     56966     yunnan         101.8331       23.3500          147       127     2012      08        30        243              0.248458      26.248352       0.788630       0.278755       0.275000       0.084100   -9999.000000       0.569000
56966     56966     yunnan         101.8331       23.3500          147       127     2012      08        31        244              0.289667      26.463257       0.860354       0.275587       0.282500   -9999.000000   -9999.000000       0.642000
56966     56966     yunnan         101.8331       23.3500          147       127     2012      09        01        245              0.311500      26.222168       2.877130       0.275196   -9999.000000       0.220500       0.098100       0.701000
56966     56966     yunnan         101.8331       23.3500          147       127     2012      09        02        246              0.303667      25.661865       6.386361       0.282380   -9999.000000   -9999.000000       0.101900   -9999.000000
56966     56966     yunnan         101.8331       23.3500          147       127     2012      09        03        247              0.293708      24.649261       0.000000       0.290898       0.284000   -9999.000000       0.095400       0.551000
56966     56966     yunnan         101.8331       23.3500          147       127     2012      09        04        248              0.271708      24.351868       1.463988       0.279147       0.318500       0.211400   -9999.000000   -9999.000000
56966     56966     yunnan         101.8331       23.3500          147       127     2012      09        05        249              0.248583      24.774323       0.000000       0.273499       0.285500   -9999.000000   -9999.000000       0.534000
56966     56966     yunnan         101.8331       23.3500          147       127     2012      09        06        250              0.232250      24.739319       0.000000       0.268280   -9999.000000       0.206700   -9999.000000       0.549000
56966     56966     yunnan         101.8331       23.3500          147       127     2012      09        07        251              0.222042      24.898651       2.835765       0.264320   -9999.000000   -9999.000000       0.098500       0.555000
56966     56966     yunnan         101.8331       23.3500          147       127     2012      09        08        252              0.218667      24.664551       2.556156       0.270826   -9999.000000   -9999.000000       0.099400       0.678000
56966     56966     yunnan         101.8331       23.3500          147       127     2012      09        09        253              0.215917      24.662262       1.046501       0.277855       0.221000       0.232300       0.094600   -9999.000000
56966     56966     yunnan         101.8331       23.3500          147       127     2012      09        10        254              0.215708      25.624298      20.514038       0.272414       0.290000   -9999.000000   -9999.000000       0.702000
56966     56966     yunnan         101.8331       23.3500          147       127     2012      09        11        255              0.260583      24.865204       7.562257       0.295353       0.301500       0.229800   -9999.000000       0.784000
56966     56966     yunnan         101.8331       23.3500          147       127     2012      09        12        256              0.293583      24.325226      14.814329       0.309453   -9999.000000       0.101200   -9999.000000       0.694000
56966     56966     yunnan         101.8331       23.3500          147       127     2012      09        13        257              0.319333      24.576050      19.599783       0.313633   -9999.000000   -9999.000000       0.072400       0.939000
56966     56966     yunnan         101.8331       23.3500          147       127     2012      09        14        258              0.311042      21.034485       0.184159       0.323762       0.294500       0.328000       0.070500   -9999.000000
56966     56966     yunnan         101.8331       23.3500          147       127     2012      09        15        259              0.301375      20.714661       0.000000       0.300488       0.323000   -9999.000000   -9999.000000       0.584000
56966     56966     yunnan         101.8331       23.3500          147       127     2012      09        16        260              0.294000      20.814209       0.000000       0.290376       0.314000       0.168000   -9999.000000   -9999.000000
56966     56966     yunnan         101.8331       23.3500          147       127     2012      09        17        261              0.284792      21.318329       0.000000       0.286607   -9999.000000   -9999.000000   -9999.000000       0.473000
56966     56966     yunnan         101.8331       23.3500          147       127     2012      09        18        262              0.271292      22.451263       0.000000       0.283941   -9999.000000   -9999.000000       0.108200       0.590000
56966     56966     yunnan         101.8331       23.3500          147       127     2012      09        19        263              0.300583      23.821594       6.857468       0.281398       0.325000       0.247300       0.115200       0.907000
56966     56966     yunnan         101.8331       23.3500          147       127     2012      09        20        264              0.311375      24.471680       1.803694       0.292290       0.273000   -9999.000000       0.107700       0.627000
56966     56966     yunnan         101.8331       23.3500          147       127     2012      09        21        265              0.294667      24.853668       0.714014       0.288345   -9999.000000   -9999.000000   -9999.000000   -9999.000000
56966     56966     yunnan         101.8331       23.3500          147       127     2012      09        22        266              0.289500      24.940125       4.912731       0.281071       0.227500       0.169200   -9999.000000       0.616000
56966     56966     yunnan         101.8331       23.3500          147       127     2012      09        23        267              0.299417      25.345825       0.000000       0.287434   -9999.000000   -9999.000000   -9999.000000       0.609000
56966     56966     yunnan         101.8331       23.3500          147       127     2012      09        24        268              0.283708      25.548004       0.274969       0.280229   -9999.000000       0.155500       0.100100       0.541000
56966     56966     yunnan         101.8331       23.3500          147       127     2012      09        25        269              0.261667      25.720642       0.884306       0.275321       0.210500   -9999.000000       0.104100       0.600000
56966     56966     yunnan         101.8331       23.3500          147       127     2012      09        26        270              0.243583      24.137604       0.034056       0.276532       0.217500   -9999.000000   -9999.000000   -9999.000000
56966     56966     yunnan         101.8331       23.3500          147       127     2012      09        27        271              0.234214      24.885010       0.237619       0.270770       0.226000       0.213400   -9999.000000       0.521000
56966     56966     yunnan         101.8331       23.3500          147       127     2012      09        28        272              0.220867      24.701874       1.361236       0.268776   -9999.000000   -9999.000000   -9999.000000       0.537000
56966     56966     yunnan         101.8331       23.3500          147       127     2012      09        29        273              0.213208      23.234985       0.305429       0.273321   -9999.000000       0.224700       0.104600       0.567000
56966     56966     yunnan         101.8331       23.3500          147       127     2012      09        30        274              0.211583      22.971252       2.751807       0.270433       0.241000   -9999.000000       0.105800       0.533000
56966     56966     yunnan         101.8331       23.3500          147       127     2012      10        01        275              0.218708      22.083099       7.546011       0.277380       0.301500   -9999.000000       0.122100   -9999.000000
56966     56966     yunnan         101.8331       23.3500          147       127     2012      10        02        276              0.267500      21.751190       1.984556       0.289674       0.301000       0.379700   -9999.000000       0.601000
56966     56966     yunnan         101.8331       23.3500          147       127     2012      10        03        277              0.276625      22.098663       2.570855       0.290991   -9999.000000   -9999.000000   -9999.000000   -9999.000000
56966     56966     yunnan         101.8331       23.3500          147       127     2012      10        04        278              0.265625      23.205139       3.656955       0.285807   -9999.000000       0.096000   -9999.000000       0.702000
56966     56966     yunnan         101.8331       23.3500          147       127     2012      10        05        279              0.250875      24.121277       1.058003       0.285333   -9999.000000   -9999.000000       0.114700       0.591000
56966     56966     yunnan         101.8331       23.3500          147       127     2012      10        06        280              0.238583      24.090851       6.311549       0.281097       0.297500   -9999.000000       0.120000       0.687000
56966     56966     yunnan         101.8331       23.3500          147       127     2012      10        07        281              0.230083      22.868805       0.000000       0.293413       0.300500       0.342900       0.115200       0.682000
56966     56966     yunnan         101.8331       23.3500          147       127     2012      10        08        282              0.216208      22.262390       0.000000       0.281587       0.289500   -9999.000000   -9999.000000   -9999.000000
56966     56966     yunnan         101.8331       23.3500          147       127     2012      10        09        283              0.202750      22.693268       0.000000       0.275227   -9999.000000   -9999.000000   -9999.000000       0.432000
56966     56966     yunnan         101.8331       23.3500          147       127     2012      10        10        284              0.189792      22.255524       0.000000       0.271803   -9999.000000   -9999.000000   -9999.000000       0.410000
56966     56966     yunnan         101.8331       23.3500          147       127     2012      10        11        285              0.176292      22.515594       0.090623       0.269294       0.270000   -9999.000000       0.112100       0.438000
56966     56966     yunnan         101.8331       23.3500          147       127     2012      10        12        286              0.166458      22.796661       1.164840       0.266515       0.304000       0.201800       0.114700       0.502000
56966     56966     yunnan         101.8331       23.3500          147       127     2012      10        13        287              0.157667      22.428925       0.100076       0.269876       0.298500   -9999.000000   -9999.000000   -9999.000000
56966     56966     yunnan         101.8331       23.3500          147       127     2012      10        14        288              0.147375      23.179382       0.000000       0.267006   -9999.000000   -9999.000000   -9999.000000       0.540000
56966     56966     yunnan         101.8331       23.3500          147       127     2012      10        15        289              0.138042      23.591644       0.726040       0.263659   -9999.000000       0.192500   -9999.000000   -9999.000000
56966     56966     yunnan         101.8331       23.3500          147       127     2012      10        16        290              0.131500      23.438751       0.642830       0.261629   -9999.000000   -9999.000000       0.154300       0.500000
56966     56966     yunnan         101.8331       23.3500          147       127     2012      10        17        291              0.127375      23.257324       0.055853       0.259933       0.313000       0.062500       0.153600       0.552000
56966     56966     yunnan         101.8331       23.3500          147       127     2012      10        18        292              0.124542      21.681519       0.000000       0.259791       0.294000   -9999.000000       0.148600       0.396000
56966     56966     yunnan         101.8331       23.3500          147       127     2012      10        19        293              0.120292      22.424927       0.000000       0.258559       0.289500   -9999.000000   -9999.000000       0.497000
56966     56966     yunnan         101.8331       23.3500          147       127     2012      10        20        294              0.116042      22.358734       0.000000       0.256592   -9999.000000       0.165300   -9999.000000   -9999.000000
56966     56966     yunnan         101.8331       23.3500          147       127     2012      10        21        295              0.112500      22.067871       0.000000       0.255047   -9999.000000   -9999.000000   -9999.000000       0.341000
56966     56966     yunnan         101.8331       23.3500          147       127     2012      10        22        296              0.109375      21.688080       0.000000       0.253626   -9999.000000   -9999.000000       0.176400       0.433000
56966     56966     yunnan         101.8331       23.3500          147       127     2012      10        23        297              0.107542      21.194458       0.000000       0.252483   -9999.000000       0.069800       0.181100       0.468000
56966     56966     yunnan         101.8331       23.3500          147       127     2012      10        24        298              0.106833      21.122437       0.000000       0.252251   -9999.000000   -9999.000000       0.173100   -9999.000000
56966     56966     yunnan         101.8331       23.3500          147       127     2012      10        25        299              0.000000      21.299622       0.000000       0.251657   -9999.000000       0.206200   -9999.000000   -9999.000000
56966     56966     yunnan         101.8331       23.3500          147       127     2012      10        26        300              0.103708      21.515350       0.000000       0.250639   -9999.000000   -9999.000000   -9999.000000       0.218000
56966     56966     yunnan         101.8331       23.3500          147       127     2012      10        27        301              0.102750      21.244446       0.000000       0.249437       0.301000   -9999.000000   -9999.000000       0.349000
56966     56966     yunnan         101.8331       23.3500          147       127     2012      10        28        302              0.000000      21.192596       0.000000       0.249137       0.306000       0.158100       0.180700       0.355000
56966     56966     yunnan         101.8331       23.3500          147       127     2012      10        29        303              0.101625      21.566162       0.000000       0.248081       0.318500   -9999.000000       0.162000       0.459000
56966     56966     yunnan         101.8331       23.3500          147       127     2012      10        30        304              0.101083      21.893250       4.071921       0.246613   -9999.000000       0.158500   -9999.000000   -9999.000000
56966     56966     yunnan         101.8331       23.3500          147       127     2012      10        31        305              0.100348      20.737274       0.502917       0.264013   -9999.000000   -9999.000000   -9999.000000       0.177000
56966     56966     yunnan         101.8331       23.3500          147       127     2012      11        01        306              0.100500      19.448090       0.000000       0.259786   -9999.000000   -9999.000000   -9999.000000   -9999.000000
56966     56966     yunnan         101.8331       23.3500          147       127     2012      11        02        307              0.100208      19.249725       0.000000       0.257030       0.361000   -9999.000000       0.156200       0.357000
56966     56966     yunnan         101.8331       23.3500          147       127     2012      11        03        308              0.099750      19.581055       0.000000       0.254280       0.379000   -9999.000000       0.157600       0.265000
56966     56966     yunnan         101.8331       23.3500          147       127     2012      11        04        309              0.098750      19.522400       0.082444       0.251961       0.412500       0.045500       0.159100       0.259000
56966     56966     yunnan         101.8331       23.3500          147       127     2012      11        05        310              0.098000      19.655426       0.519720       0.251673   -9999.000000   -9999.000000   -9999.000000       0.455000
56966     56966     yunnan         101.8331       23.3500          147       127     2012      11        06        311              0.098875      19.782501       0.107059       0.254443   -9999.000000   -9999.000000   -9999.000000   -9999.000000
56966     56966     yunnan         101.8331       23.3500          147       127     2012      11        07        312              0.107708      20.340973       7.913592       0.254809       0.395000       0.064300   -9999.000000       0.736000
56966     56966     yunnan         101.8331       23.3500          147       127     2012      11        08        313              0.168792      20.859894      10.568910       0.272216       0.420000   -9999.000000       0.229800       0.788000
56966     56966     yunnan         101.8331       23.3500          147       127     2012      11        09        314              0.174000      19.685242       0.200665       0.300662       0.417000   -9999.000000       0.230900       0.480000
56966     56966     yunnan         101.8331       23.3500          147       127     2012      11        10        315              0.167167      19.772583       0.000000       0.277593   -9999.000000       0.038500       0.219000       0.602000
56966     56966     yunnan         101.8331       23.3500          147       127     2012      11        11        316              0.153542      19.258057       0.000000       0.270245   -9999.000000   -9999.000000   -9999.000000   -9999.000000
56966     56966     yunnan         101.8331       23.3500          147       127     2012      11        12        317              0.145083      19.434143       0.000000       0.265755   -9999.000000       0.280900   -9999.000000       0.267000
56966     56966     yunnan         101.8331       23.3500          147       127     2012      11        13        318              0.000000      19.821716       1.216788       0.261965       0.477000   -9999.000000   -9999.000000   -9999.000000
56966     56966     yunnan         101.8331       23.3500          147       127     2012      11        14        319              0.137542      20.455475      10.961925       0.260639       0.498500   -9999.000000       0.207000       0.643000
56966     56966     yunnan         101.8331       23.3500          147       127     2012      11        15        320              0.152875      20.571899      24.049305       0.290315       0.500000       0.225600       0.219000       0.491000
56966     56966     yunnan         101.8331       23.3500          147       127     2012      11        16        321              0.251625      20.267120       3.738045       0.302629   -9999.000000   -9999.000000   -9999.000000       0.672000
56966     56966     yunnan         101.8331       23.3500          147       127     2012      11        17        322              0.000000      19.927368       0.000000       0.309215   -9999.000000       0.284400   -9999.000000       0.569000
56966     56966     yunnan         101.8331       23.3500          147       127     2012      11        18        323              0.246583      19.794739       0.000000       0.289268       0.491500   -9999.000000   -9999.000000   -9999.000000
56966     56966     yunnan         101.8331       23.3500          147       127     2012      11        19        324              0.233042      19.242493       0.000000       0.281006       0.493000   -9999.000000       0.206000       0.364000
56966     56966     yunnan         101.8331       23.3500          147       127     2012      11        20        325              0.214917      19.625214       0.000000       0.275385       0.494000       0.062000       0.208000       0.545000
56966     56966     yunnan         101.8331       23.3500          147       127     2012      11        21        326              0.195458      20.203796       0.000000       0.270702   -9999.000000   -9999.000000       0.198600       0.507000
56966     56966     yunnan         101.8331       23.3500          147       127     2012      11        22        327              0.177417      20.204285       0.000000       0.266856   -9999.000000       0.032100   -9999.000000       0.448000
56966     56966     yunnan         101.8331       23.3500          147       127     2012      11        23        328              0.163542      19.609894       0.000000       0.263298       0.381500   -9999.000000   -9999.000000   -9999.000000
56966     56966     yunnan         101.8331       23.3500          147       127     2012      11        24        329              0.153458      19.051788       0.000000       0.260720       0.369500   -9999.000000   -9999.000000       0.301000
56966     56966     yunnan         101.8331       23.3500          147       127     2012      11        25        330              0.144417      19.057709       0.000000       0.259023       0.387500       0.148100       0.202700       0.368000
56966     56966     yunnan         101.8331       23.3500          147       127     2012      11        26        331              0.138750      19.007874       0.000000       0.257191   -9999.000000   -9999.000000       0.205500       0.311000
56966     56966     yunnan         101.8331       23.3500          147       127     2012      11        27        332              0.134583      19.161560       0.000000       0.256279   -9999.000000   -9999.000000   -9999.000000       0.356000
56966     56966     yunnan         101.8331       23.3500          147       127     2012      11        28        333              0.130083      19.082855       0.000000       0.254623   -9999.000000   -9999.000000   -9999.000000   -9999.000000
56966     56966     yunnan         101.8331       23.3500          147       127     2012      11        29        334              0.125833      18.515076       0.000000       0.253036       0.381500   -9999.000000   -9999.000000       0.133000
56966     56966     yunnan         101.8331       23.3500          147       127     2012      11        30        335              0.122458      18.630066       0.000000       0.251866       0.410500       0.187700       0.213400   -9999.000000
56966     56966     yunnan         101.8331       23.3500          147       127     2012      12        01        336              0.119652      19.279144       0.000000       0.251628       0.337500   -9999.000000       0.213400       0.362000
56966     56966     yunnan         101.8331       23.3500          147       127     2012      12        02        337              0.117792      19.232300       0.000000       0.250512   -9999.000000   -9999.000000       0.212700       0.263000
56966     56966     yunnan         101.8331       23.3500          147       127     2012      12        03        338              0.116167      18.907654       0.000000       0.249753   -9999.000000       0.076700   -9999.000000       0.128000
56966     56966     yunnan         101.8331       23.3500          147       127     2012      12        04        339              0.114250      18.284637       0.000000       0.248099       0.319500   -9999.000000   -9999.000000       0.318000
56966     56966     yunnan         101.8331       23.3500          147       127     2012      12        05        340              0.111667      17.838074       0.000000       0.246809       0.364000       0.111400   -9999.000000   -9999.000000
56966     56966     yunnan         101.8331       23.3500          147       127     2012      12        06        341              0.111625      16.279938       0.000000       0.247460       0.341000   -9999.000000       0.196900       0.283000
56966     56966     yunnan         101.8331       23.3500          147       127     2012      12        07        342              0.110208      16.870911       0.000000       0.247304   -9999.000000   -9999.000000       0.199200       0.187000
56966     56966     yunnan         101.8331       23.3500          147       127     2012      12        08        343              0.109125      17.219818       0.000000       0.247840   -9999.000000       0.235600       0.190100       0.127000
56966     56966     yunnan         101.8331       23.3500          147       127     2012      12        09        344              0.108375      17.413300       0.000000       0.247541   -9999.000000   -9999.000000   -9999.000000       0.327000
56966     56966     yunnan         101.8331       23.3500          147       127     2012      12        10        345              0.108375      17.364410       0.000000       0.246538       0.321000       0.026800   -9999.000000   -9999.000000
56966     56966     yunnan         101.8331       23.3500          147       127     2012      12        11        346              0.108333      16.803192       0.000000       0.244761       0.355000   -9999.000000   -9999.000000       0.067000
56966     56966     yunnan         101.8331       23.3500          147       127     2012      12        12        347              0.108208      16.443481       0.000000       0.243788       0.366500   -9999.000000       0.216900   -9999.000000
56966     56966     yunnan         101.8331       23.3500          147       127     2012      12        13        348              0.108375      16.478424       0.000000       0.244092   -9999.000000       0.187600       0.219400       0.101000
56966     56966     yunnan         101.8331       23.3500          147       127     2012      12        14        349              0.108167      16.487213       0.000000       0.243350   -9999.000000   -9999.000000   -9999.000000       0.262000
56966     56966     yunnan         101.8331       23.3500          147       127     2012      12        15        350              0.000000      16.436401       0.000000       0.242181       0.350500   -9999.000000   -9999.000000       0.104000
56966     56966     yunnan         101.8331       23.3500          147       127     2012      12        16        351              0.106875      15.993317       0.000000       0.240717       0.359000   -9999.000000   -9999.000000       0.017000
56966     56966     yunnan         101.8331       23.3500          147       127     2012      12        17        352              0.106208      15.484436       0.000000       0.239870       0.365000   -9999.000000       0.211600   -9999.000000
56966     56966     yunnan         101.8331       23.3500          147       127     2012      12        18        353              0.106167      15.279480       0.000000       0.239455   -9999.000000       0.018400       0.214300       0.008000
56966     56966     yunnan         101.8331       23.3500          147       127     2012      12        19        354              0.105833      15.913239       0.000000       0.238891   -9999.000000   -9999.000000       0.206100       0.119000
56966     56966     yunnan         101.8331       23.3500          147       127     2012      12        20        355              0.000000      16.289764       0.359840       0.237562       0.348500   -9999.000000   -9999.000000       0.120000
56966     56966     yunnan         101.8331       23.3500          147       127     2012      12        21        356              0.103542      16.239471       0.000000       0.235974       0.413000   -9999.000000   -9999.000000       0.147000
56966     56966     yunnan         101.8331       23.3500          147       127     2012      12        22        357              0.103792      16.104309       0.000000       0.234940       0.450500   -9999.000000   -9999.000000   -9999.000000
56966     56966     yunnan         101.8331       23.3500          147       127     2012      12        23        358              0.102708      16.216492       2.634856       0.234428   -9999.000000       0.240700       0.223000   -9999.000000
56966     56966     yunnan         101.8331       23.3500          147       127     2012      12        24        359              0.103444      14.933746       0.141055       0.238534   -9999.000000   -9999.000000       0.205100       0.209000
56966     56966     yunnan         101.8331       23.3500          147       127     2012      12        25        360              0.105375      14.092377       0.000000       0.251623   -9999.000000   -9999.000000       0.197000       0.113000
56966     56966     yunnan         101.8331       23.3500          147       127     2012      12        26        361              0.000000      15.536011       1.607825       0.245816       0.437000       0.185100   -9999.000000       0.190000
56966     56966     yunnan         101.8331       23.3500          147       127     2012      12        27        362              0.118417      15.766602       0.000000       0.251234       0.434000   -9999.000000   -9999.000000   -9999.000000
56966     56966     yunnan         101.8331       23.3500          147       127     2012      12        28        363              0.121000      15.596222       0.000000       0.246358       0.450000       0.024700   -9999.000000       0.009000
56966     56966     yunnan         101.8331       23.3500          147       127     2012      12        29        364              0.000000      15.506927       0.000000       0.243145   -9999.000000   -9999.000000       0.205300   -9999.000000
56966     56966     yunnan         101.8331       23.3500          147       127     2012      12        30        365              0.000000      16.028839       0.000000       0.240951   -9999.000000   -9999.000000       0.224300       0.046000
56966     56966     yunnan         101.8331       23.3500          147       127     2012      12        31        366              0.113800      13.445984       0.054892       0.240275       0.479500       0.102300   -9999.000000   -9999.000000
