# Supplementary material for: Research on Fusing Multisatellite Soil Moisture Data Based on Bayesian Model Averaging
Source: Hindawi journal article supplement (doi:10.1155/2018/9310838), 2018-06-25
Supplement: f1 [file 9310838.f1.zip › 2012_sm00-10cm_daily_ZDB_ZHY_57004_366days_allin.txt]

57004     57004     gansu          104.8800       34.7300          101       140     2012      01        01        001              0.000000   -9999.000000       0.000000   -9999.000000       0.068000   -9999.000000   -9999.000000   -9999.000000
57004     57004     gansu          104.8800       34.7300          101       140     2012      01        02        002              0.047583      -3.331360       0.000000       0.164949   -9999.000000   -9999.000000       0.051400   -9999.000000
57004     57004     gansu          104.8800       34.7300          101       140     2012      01        03        003              0.000000      -3.533051       0.000000       0.165170   -9999.000000   -9999.000000       0.046100       0.041000
57004     57004     gansu          104.8800       34.7300          101       140     2012      01        04        004              0.032625      -5.760376       0.000000       0.151502   -9999.000000       0.126500       0.053200       0.015000
57004     57004     gansu          104.8800       34.7300          101       140     2012      01        05        005              0.032750      -5.510864       0.000000       0.149028       0.072000   -9999.000000       0.051400   -9999.000000
57004     57004     gansu          104.8800       34.7300          101       140     2012      01        06        006              0.032500      -3.776611       0.000000       0.163018   -9999.000000   -9999.000000       0.052100       0.013000
57004     57004     gansu          104.8800       34.7300          101       140     2012      01        07        007              0.035174      -4.383331       0.636700       0.148982   -9999.000000   -9999.000000   -9999.000000   -9999.000000
57004     57004     gansu          104.8800       34.7300          101       140     2012      01        08        008              0.000000      -3.522919       0.000000       0.163332   -9999.000000   -9999.000000       0.052400       0.063000
57004     57004     gansu          104.8800       34.7300          101       140     2012      01        09        009              0.038167      -2.582550       0.000000       0.172527   -9999.000000   -9999.000000   -9999.000000       0.003000
57004     57004     gansu          104.8800       34.7300          101       140     2012      01        10        010              0.036000      -2.368256       0.000000       0.175648   -9999.000000   -9999.000000   -9999.000000   -9999.000000
57004     57004     gansu          104.8800       34.7300          101       140     2012      01        11        011              0.033130      -3.544617      41.162449       0.165148   -9999.000000       0.072300       0.048100   -9999.000000
57004     57004     gansu          104.8800       34.7300          101       140     2012      01        12        012              0.034208      -3.242584       0.111628       0.169206   -9999.000000   -9999.000000   -9999.000000   -9999.000000
57004     57004     gansu          104.8800       34.7300          101       140     2012      01        13        013              0.036083      -2.309113       0.000000       0.178227   -9999.000000   -9999.000000   -9999.000000       0.004000
57004     57004     gansu          104.8800       34.7300          101       140     2012      01        14        014              0.035125      -3.036133       0.544121       0.165232   -9999.000000       0.091900       0.047100   -9999.000000
57004     57004     gansu          104.8800       34.7300          101       140     2012      01        15        015              0.033957      -2.616486       0.000000       0.179258   -9999.000000   -9999.000000       0.053900       0.017000
57004     57004     gansu          104.8800       34.7300          101       140     2012      01        16        016              0.043542      -2.630890       0.336382       0.169824       0.065000   -9999.000000       0.040700       0.013000
57004     57004     gansu          104.8800       34.7300          101       140     2012      01        17        017              0.000000      -1.133545       0.475227       0.193731   -9999.000000   -9999.000000       0.040700   -9999.000000
57004     57004     gansu          104.8800       34.7300          101       140     2012      01        18        018              0.040792      -1.231537       0.000000       0.200124   -9999.000000   -9999.000000   -9999.000000       0.007000
57004     57004     gansu          104.8800       34.7300          101       140     2012      01        19        019              0.040417      -1.616547       0.545503       0.185580   -9999.000000   -9999.000000       0.047800   -9999.000000
57004     57004     gansu          104.8800       34.7300          101       140     2012      01        20        020              0.042208      -3.334534       0.248152       0.161227   -9999.000000   -9999.000000       0.039700       0.056000
57004     57004     gansu          104.8800       34.7300          101       140     2012      01        21        021              0.041917      -4.630524       0.448081       0.152738   -9999.000000   -9999.000000       0.039700       0.023000
57004     57004     gansu          104.8800       34.7300          101       140     2012      01        22        022              0.038609      -6.940002       0.000000       0.143745   -9999.000000       0.111400       0.035500   -9999.000000
57004     57004     gansu          104.8800       34.7300          101       140     2012      01        23        023              0.035348      -9.250977       0.000000       0.138421   -9999.000000   -9999.000000       0.033100   -9999.000000
57004     57004     gansu          104.8800       34.7300          101       140     2012      01        24        024              0.032375      -9.622498       0.666674       0.137094   -9999.000000   -9999.000000   -9999.000000   -9999.000000
57004     57004     gansu          104.8800       34.7300          101       140     2012      01        25        025              0.029833     -10.273071       0.045512       0.135940   -9999.000000       0.013500       0.029300       0.002000
57004     57004     gansu          104.8800       34.7300          101       140     2012      01        26        026              0.029417      -9.140686       0.000000       0.135422   -9999.000000   -9999.000000       0.033100   -9999.000000
57004     57004     gansu          104.8800       34.7300          101       140     2012      01        27        027              0.029750      -6.850922       1.586086       0.138745   -9999.000000       0.005000       0.030500   -9999.000000
57004     57004     gansu          104.8800       34.7300          101       140     2012      01        28        028              0.030667      -5.279724       0.467077       0.145294   -9999.000000   -9999.000000       0.031600       0.030000
57004     57004     gansu          104.8800       34.7300          101       140     2012      01        29        029              0.034500      -4.107422       0.000000       0.155116   -9999.000000   -9999.000000   -9999.000000   -9999.000000
57004     57004     gansu          104.8800       34.7300          101       140     2012      01        30        030              0.041292      -3.357056       0.556897       0.160168   -9999.000000   -9999.000000   -9999.000000       0.073000
57004     57004     gansu          104.8800       34.7300          101       140     2012      01        31        031              0.039542      -1.815552       1.092267       0.187914   -9999.000000   -9999.000000       0.023500   -9999.000000
57004     57004     gansu          104.8800       34.7300          101       140     2012      02        01        032              0.081083      -2.949951       0.000000       0.165732   -9999.000000   -9999.000000       0.022000       0.109000
57004     57004     gansu          104.8800       34.7300          101       140     2012      02        02        033              0.077208      -1.901093       0.000000       0.184771   -9999.000000   -9999.000000       0.029200       0.059000
57004     57004     gansu          104.8800       34.7300          101       140     2012      02        03        034              0.045250      -2.684906       0.000000       0.179212   -9999.000000   -9999.000000       0.025500   -9999.000000
57004     57004     gansu          104.8800       34.7300          101       140     2012      02        04        035              0.055792      -4.503021       0.000000       0.148865   -9999.000000   -9999.000000   -9999.000000       0.065000
57004     57004     gansu          104.8800       34.7300          101       140     2012      02        05        036              0.066708      -1.160065       0.000000       0.195607       0.069000   -9999.000000       0.022100   -9999.000000
57004     57004     gansu          104.8800       34.7300          101       140     2012      02        06        037              0.081542       0.330566       0.000000       0.220309   -9999.000000   -9999.000000       0.015800       0.218000
57004     57004     gansu          104.8800       34.7300          101       140     2012      02        07        038              0.056833      -2.212738       0.000000       0.190476   -9999.000000   -9999.000000       0.020300       0.015000
57004     57004     gansu          104.8800       34.7300          101       140     2012      02        08        039              0.049667      -3.018494       0.000000       0.171623   -9999.000000   -9999.000000       0.027000       0.072000
57004     57004     gansu          104.8800       34.7300          101       140     2012      02        09        040              0.046500      -3.123535       0.000000       0.170752   -9999.000000   -9999.000000       0.020600       0.035000
57004     57004     gansu          104.8800       34.7300          101       140     2012      02        10        041              0.045083      -5.263489       1.384628       0.149662   -9999.000000   -9999.000000   -9999.000000   -9999.000000
57004     57004     gansu          104.8800       34.7300          101       140     2012      02        11        042              0.047375      -3.984619       0.000000       0.163883   -9999.000000   -9999.000000       0.026400       0.063000
57004     57004     gansu          104.8800       34.7300          101       140     2012      02        12        043              0.056958      -3.481537       0.040482       0.160925   -9999.000000   -9999.000000   -9999.000000       0.042000
57004     57004     gansu          104.8800       34.7300          101       140     2012      02        13        044              0.060333      -1.954407       0.000000       0.183550   -9999.000000   -9999.000000       0.029300       0.078000
57004     57004     gansu          104.8800       34.7300          101       140     2012      02        14        045              0.077958      -1.865997       0.000000       0.179812   -9999.000000       0.045800   -9999.000000       0.109000
57004     57004     gansu          104.8800       34.7300          101       140     2012      02        15        046              0.082250       0.448456       0.000000       0.217361   -9999.000000   -9999.000000   -9999.000000   -9999.000000
57004     57004     gansu          104.8800       34.7300          101       140     2012      02        16        047              0.078130      -1.330414       0.000000       0.197357       0.077000   -9999.000000   -9999.000000       0.081000
57004     57004     gansu          104.8800       34.7300          101       140     2012      02        17        048              0.060917      -1.259277       0.000000       0.194920   -9999.000000   -9999.000000       0.024500   -9999.000000
57004     57004     gansu          104.8800       34.7300          101       140     2012      02        18        049              0.054458      -3.396454       0.000000       0.165078   -9999.000000   -9999.000000       0.020900       0.026000
57004     57004     gansu          104.8800       34.7300          101       140     2012      02        19        050              0.057500      -2.644775       0.000000       0.175767   -9999.000000   -9999.000000       0.030200       0.075000
57004     57004     gansu          104.8800       34.7300          101       140     2012      02        20        051              0.084042      -2.376526       0.000000       0.170096   -9999.000000   -9999.000000       0.038600   -9999.000000
57004     57004     gansu          104.8800       34.7300          101       140     2012      02        21        052              0.113750      -0.098663       0.000000       0.209117       0.079000   -9999.000000   -9999.000000       0.202000
57004     57004     gansu          104.8800       34.7300          101       140     2012      02        22        053              0.134208       1.999176       0.574282       0.240669   -9999.000000       0.048300       0.030200   -9999.000000
57004     57004     gansu          104.8800       34.7300          101       140     2012      02        23        054              0.123667       1.346863       0.602190       0.238276       0.080000   -9999.000000       0.032800       0.268000
57004     57004     gansu          104.8800       34.7300          101       140     2012      02        24        055              0.121833       1.538452       0.000000       0.241414   -9999.000000   -9999.000000       0.027200   -9999.000000
57004     57004     gansu          104.8800       34.7300          101       140     2012      02        25        056              0.090833      -0.807587       0.000000       0.201316   -9999.000000       0.052800       0.025900   -9999.000000
57004     57004     gansu          104.8800       34.7300          101       140     2012      02        26        057              0.088125      -1.885681       0.000000       0.179254       0.083000   -9999.000000       0.045900       0.171000
57004     57004     gansu          104.8800       34.7300          101       140     2012      02        27        058              0.103458       0.740845       0.000000       0.219853       0.083000       0.057300   -9999.000000   -9999.000000
57004     57004     gansu          104.8800       34.7300          101       140     2012      02        28        059              0.104174       1.825531       0.000000       0.235167   -9999.000000   -9999.000000   -9999.000000       0.183000
57004     57004     gansu          104.8800       34.7300          101       140     2012      02        29        060              0.000000   -9999.000000       0.000000   -9999.000000       0.084000   -9999.000000   -9999.000000   -9999.000000
57004     57004     gansu          104.8800       34.7300          101       140     2012      03        01        061              0.131042      -0.095062       0.763610       0.209588   -9999.000000   -9999.000000       0.062000       0.363000
57004     57004     gansu          104.8800       34.7300          101       140     2012      03        02        062              0.134091       2.070953       0.400897       0.246397   -9999.000000   -9999.000000       0.057800       0.454000
57004     57004     gansu          104.8800       34.7300          101       140     2012      03        03        063              0.133083       1.305878       4.149813       0.243720   -9999.000000   -9999.000000   -9999.000000   -9999.000000
57004     57004     gansu          104.8800       34.7300          101       140     2012      03        04        064              0.130500       1.098114       0.000000       0.240771       0.097000   -9999.000000   -9999.000000       0.405000
57004     57004     gansu          104.8800       34.7300          101       140     2012      03        05        065              0.129174       1.575989       0.258992       0.243887   -9999.000000   -9999.000000       0.043500   -9999.000000
57004     57004     gansu          104.8800       34.7300          101       140     2012      03        06        066              0.167435       0.561188       0.000000       0.225417   -9999.000000   -9999.000000       0.039500       0.354000
57004     57004     gansu          104.8800       34.7300          101       140     2012      03        07        067              0.000000       1.415955       0.000000       0.235800   -9999.000000   -9999.000000       0.055100       0.379000
57004     57004     gansu          104.8800       34.7300          101       140     2012      03        08        068              0.206826       0.865387       0.601022       0.232802   -9999.000000   -9999.000000       0.052600       0.477000
57004     57004     gansu          104.8800       34.7300          101       140     2012      03        09        069              0.205591       0.892578       0.175725       0.233553       0.091000   -9999.000000   -9999.000000       0.357000
57004     57004     gansu          104.8800       34.7300          101       140     2012      03        10        070              0.200792       2.409790       0.134379       0.246760       0.091000   -9999.000000       0.040700   -9999.000000
57004     57004     gansu          104.8800       34.7300          101       140     2012      03        11        071              0.197167       3.658478       0.000000       0.259854   -9999.000000   -9999.000000       0.049100       0.503000
57004     57004     gansu          104.8800       34.7300          101       140     2012      03        12        072              0.192000       4.560486       0.000000       0.269832   -9999.000000   -9999.000000       0.045200       0.393000
57004     57004     gansu          104.8800       34.7300          101       140     2012      03        13        073              0.190708       3.263428       0.000000       0.266259       0.104000   -9999.000000       0.076200       0.559000
57004     57004     gansu          104.8800       34.7300          101       140     2012      03        14        074              0.185167       6.847900       0.000000       0.278882       0.097000   -9999.000000   -9999.000000       0.459000
57004     57004     gansu          104.8800       34.7300          101       140     2012      03        15        075              0.181826       4.826050       0.000000       0.280817       0.092000   -9999.000000   -9999.000000   -9999.000000
57004     57004     gansu          104.8800       34.7300          101       140     2012      03        16        076              0.180000       4.847870       0.000000       0.281278   -9999.000000   -9999.000000       0.054300       0.509000
57004     57004     gansu          104.8800       34.7300          101       140     2012      03        17        077              0.177417       7.607300       0.000000       0.279175   -9999.000000   -9999.000000       0.062600   -9999.000000
57004     57004     gansu          104.8800       34.7300          101       140     2012      03        18        078              0.173864       9.548218       0.190585       0.276463       0.092000   -9999.000000       0.055900       0.554000
57004     57004     gansu          104.8800       34.7300          101       140     2012      03        19        079              0.172708       9.708221       0.000000       0.274928       0.087000       0.291400       0.073500       0.422000
57004     57004     gansu          104.8800       34.7300          101       140     2012      03        20        080              0.170375       9.355499       0.585903       0.274241       0.082000   -9999.000000   -9999.000000   -9999.000000
57004     57004     gansu          104.8800       34.7300          101       140     2012      03        21        081              0.167174       8.480804       0.069422       0.274265       0.102000       0.044800       0.064900       0.382000
57004     57004     gansu          104.8800       34.7300          101       140     2012      03        22        082              0.164625       4.527893       0.556313       0.270410   -9999.000000       0.097500       0.052100   -9999.000000
57004     57004     gansu          104.8800       34.7300          101       140     2012      03        23        083              0.164667       2.318115       0.000000       0.248469   -9999.000000   -9999.000000       0.059500       0.190000
57004     57004     gansu          104.8800       34.7300          101       140     2012      03        24        084              0.162500       5.655701       0.000000       0.255402       0.087000   -9999.000000       0.054400   -9999.000000
57004     57004     gansu          104.8800       34.7300          101       140     2012      03        25        085              0.000000       8.165039       0.000000       0.264432       0.083000   -9999.000000       0.060300   -9999.000000
57004     57004     gansu          104.8800       34.7300          101       140     2012      03        26        086              0.157042      10.059998       3.237010       0.263833       0.083000   -9999.000000   -9999.000000       0.161000
57004     57004     gansu          104.8800       34.7300          101       140     2012      03        27        087              0.153875      11.099335       0.408166       0.281874   -9999.000000       0.069000       0.101300   -9999.000000
57004     57004     gansu          104.8800       34.7300          101       140     2012      03        28        088              0.152958      12.276581       0.318219       0.272904   -9999.000000   -9999.000000       0.095100       0.553000
57004     57004     gansu          104.8800       34.7300          101       140     2012      03        29        089              0.155208       8.797821       0.000000       0.276483       0.092000       0.128900       0.086800   -9999.000000
57004     57004     gansu          104.8800       34.7300          101       140     2012      03        30        090              0.152458      10.844482       0.272326       0.269970       0.089000   -9999.000000       0.070000       0.400000
57004     57004     gansu          104.8800       34.7300          101       140     2012      03        31        091              0.152250       7.443817       0.236594       0.264712       0.079000   -9999.000000       0.064100       0.259000
57004     57004     gansu          104.8800       34.7300          101       140     2012      04        01        092              0.149250      11.446411       0.000000       0.261978   -9999.000000       0.070700   -9999.000000   -9999.000000
57004     57004     gansu          104.8800       34.7300          101       140     2012      04        02        093              0.146000      10.857025       0.000000       0.260685   -9999.000000       0.054400       0.063000       0.149000
57004     57004     gansu          104.8800       34.7300          101       140     2012      04        03        094              0.144292       9.713898       0.000000       0.256001       0.070500       0.042600       0.068600   -9999.000000
57004     57004     gansu          104.8800       34.7300          101       140     2012      04        04        095              0.141667      11.974579       0.000000       0.251703       0.067000   -9999.000000       0.054000       0.126000
57004     57004     gansu          104.8800       34.7300          101       140     2012      04        05        096              0.137708      14.221741       0.000000       0.246569       0.068000       0.077200       0.062100       0.069000
57004     57004     gansu          104.8800       34.7300          101       140     2012      04        06        097              0.133609      12.693878       1.698656       0.244830       0.089000       0.044300   -9999.000000       0.045000
57004     57004     gansu          104.8800       34.7300          101       140     2012      04        07        098              0.135375       8.163239       0.000000       0.261925       0.072000   -9999.000000       0.071000       0.121000
57004     57004     gansu          104.8800       34.7300          101       140     2012      04        08        099              0.136958      11.791168       0.102686       0.257377       0.069000       0.265000       0.066000   -9999.000000
57004     57004     gansu          104.8800       34.7300          101       140     2012      04        09        100              0.134708      14.224823       0.121867       0.249967       0.073500       0.066000       0.075800       0.139000
57004     57004     gansu          104.8800       34.7300          101       140     2012      04        10        101              0.133625      13.063324       0.734557       0.247886       0.066000       0.070300       0.057700       0.209000
57004     57004     gansu          104.8800       34.7300          101       140     2012      04        11        102              0.129833      15.582947       0.573891       0.242229       0.071000       0.023100       0.064000       0.207000
57004     57004     gansu          104.8800       34.7300          101       140     2012      04        12        103              0.126458      12.213715       0.594443       0.242507   -9999.000000   -9999.000000   -9999.000000       0.065000
57004     57004     gansu          104.8800       34.7300          101       140     2012      04        13        104              0.127333       9.233551       1.131690       0.249185       0.074000   -9999.000000       0.064400   -9999.000000
57004     57004     gansu          104.8800       34.7300          101       140     2012      04        14        105              0.126542      12.329559       1.076805       0.241393       0.065000   -9999.000000       0.068900       0.116000
57004     57004     gansu          104.8800       34.7300          101       140     2012      04        15        106              0.124708      14.203033       0.000000       0.240145       0.074000   -9999.000000       0.062200   -9999.000000
57004     57004     gansu          104.8800       34.7300          101       140     2012      04        16        107              0.121667      14.645386       2.442086       0.244152       0.076000       0.148700       0.083900       0.676000
57004     57004     gansu          104.8800       34.7300          101       140     2012      04        17        108              0.127833      12.157928       0.027849       0.259435   -9999.000000   -9999.000000   -9999.000000       0.694000
57004     57004     gansu          104.8800       34.7300          101       140     2012      04        18        109              0.136167      11.959656       0.581120       0.257351       0.081000   -9999.000000   -9999.000000   -9999.000000
57004     57004     gansu          104.8800       34.7300          101       140     2012      04        19        110              0.136375      14.836151       2.239821       0.248362       0.092000       0.100600       0.090900       0.606000
57004     57004     gansu          104.8800       34.7300          101       140     2012      04        20        111              0.140208      10.684753       0.000000       0.267281       0.073000       0.100200       0.083500   -9999.000000
57004     57004     gansu          104.8800       34.7300          101       140     2012      04        21        112              0.140042      14.397888       0.000000       0.253391       0.080000       0.106000       0.066000       0.122000
57004     57004     gansu          104.8800       34.7300          101       140     2012      04        22        113              0.139083      16.722534       0.000000       0.241380   -9999.000000   -9999.000000   -9999.000000   -9999.000000
57004     57004     gansu          104.8800       34.7300          101       140     2012      04        23        114              0.156542      19.510101       5.671704       0.232894   -9999.000000   -9999.000000   -9999.000000   -9999.000000
57004     57004     gansu          104.8800       34.7300          101       140     2012      04        24        115              0.197833      14.747955       0.000000       0.267892       0.076000       0.170000       0.095200       0.471000
57004     57004     gansu          104.8800       34.7300          101       140     2012      04        25        116              0.000000      14.124603       0.000000       0.260240       0.079500   -9999.000000       0.078100   -9999.000000
57004     57004     gansu          104.8800       34.7300          101       140     2012      04        26        117              0.178750      14.653778       0.000000       0.246591       0.073000       0.232200       0.083100       0.153000
57004     57004     gansu          104.8800       34.7300          101       140     2012      04        27        118              0.171042      17.158844       0.141504       0.235926       0.081000       0.060900       0.068700   -9999.000000
57004     57004     gansu          104.8800       34.7300          101       140     2012      04        28        119              0.162667      18.768829       0.457769       0.227768       0.081000   -9999.000000       0.072400       0.055000
57004     57004     gansu          104.8800       34.7300          101       140     2012      04        29        120              0.157826      18.592072       0.000000       0.224602       0.078000       0.161300   -9999.000000       0.158000
57004     57004     gansu          104.8800       34.7300          101       140     2012      04        30        121              0.152292      20.268280       0.473516       0.217672       0.128500   -9999.000000       0.101600   -9999.000000
57004     57004     gansu          104.8800       34.7300          101       140     2012      05        01        122              0.154667      13.042267       0.119194       0.226167       0.091000       0.432400       0.086600       0.356000
57004     57004     gansu          104.8800       34.7300          101       140     2012      05        02        123              0.154875      15.546082       1.356375       0.227407       0.110000       0.284400       0.089700   -9999.000000
57004     57004     gansu          104.8800       34.7300          101       140     2012      05        03        124              0.177750      13.707245       1.739706       0.241289       0.152000       0.037000       0.099700       0.694000
57004     57004     gansu          104.8800       34.7300          101       140     2012      05        04        125              0.214833      14.983337       0.268992       0.256813       0.132000   -9999.000000   -9999.000000       0.317000
57004     57004     gansu          104.8800       34.7300          101       140     2012      05        05        126              0.199958      16.972961       0.000000       0.251720       0.109000   -9999.000000   -9999.000000       0.192000
57004     57004     gansu          104.8800       34.7300          101       140     2012      05        06        127              0.189750      17.855652       2.682420       0.242068       0.111500       0.338600       0.087400       0.824000
57004     57004     gansu          104.8800       34.7300          101       140     2012      05        07        128              0.188333      18.620728       2.248524       0.252728   -9999.000000       0.239200       0.127700   -9999.000000
57004     57004     gansu          104.8800       34.7300          101       140     2012      05        08        129              0.183292      17.764618       0.020399       0.267235   -9999.000000       0.072200       0.095600       0.317000
57004     57004     gansu          104.8800       34.7300          101       140     2012      05        09        130              0.178667      19.664612       0.168640       0.255463   -9999.000000       0.191600       0.087100       0.149000
57004     57004     gansu          104.8800       34.7300          101       140     2012      05        10        131              0.198542      22.161377      17.158834       0.238394       0.113000   -9999.000000   -9999.000000       0.044000
57004     57004     gansu          104.8800       34.7300          101       140     2012      05        11        132              0.242167      19.080475       4.306419       0.286689       0.153000       0.258500       0.148700       0.737000
57004     57004     gansu          104.8800       34.7300          101       140     2012      05        12        133              0.228833      16.557526       0.235438       0.309201       0.149000       0.301700       0.112100   -9999.000000
57004     57004     gansu          104.8800       34.7300          101       140     2012      05        13        134              0.276417      14.432312      17.444220       0.297868   -9999.000000   -9999.000000       0.139600       0.926000
57004     57004     gansu          104.8800       34.7300          101       140     2012      05        14        135              0.266958       9.477722       0.000000       0.343913       0.142000       0.252200       0.113000   -9999.000000
57004     57004     gansu          104.8800       34.7300          101       140     2012      05        15        136              0.244750      15.345703       0.062191       0.315546       0.121500       0.168700       0.103200       0.167000
57004     57004     gansu          104.8800       34.7300          101       140     2012      05        16        137              0.225792      17.500732       0.000000       0.301587       0.114500       0.121200   -9999.000000       0.261000
57004     57004     gansu          104.8800       34.7300          101       140     2012      05        17        138              0.210500      17.521606       0.709021       0.292921       0.111000       0.187400       0.108700   -9999.000000
57004     57004     gansu          104.8800       34.7300          101       140     2012      05        18        139              0.200542      18.011963       0.171535       0.285868       0.118000   -9999.000000       0.110000       0.259000
57004     57004     gansu          104.8800       34.7300          101       140     2012      05        19        140              0.188917      19.452423       0.291179       0.276552       0.100000       0.423900       0.087400   -9999.000000
57004     57004     gansu          104.8800       34.7300          101       140     2012      05        20        141              0.176917      21.548004       5.590148       0.267655   -9999.000000       0.226100       0.094700       0.253000
57004     57004     gansu          104.8800       34.7300          101       140     2012      05        21        142              0.201292      19.115387       5.545010       0.283312       0.226000       0.253700   -9999.000000   -9999.000000
57004     57004     gansu          104.8800       34.7300          101       140     2012      05        22        143              0.240875      14.121887       0.735881       0.314397       0.212500       0.538300   -9999.000000   -9999.000000
57004     57004     gansu          104.8800       34.7300          101       140     2012      05        23        144              0.225833      13.757050       0.175400       0.307868   -9999.000000   -9999.000000       0.153000       0.580000
57004     57004     gansu          104.8800       34.7300          101       140     2012      05        24        145              0.215250      12.075348       1.947512       0.300336       0.179000   -9999.000000       0.140000   -9999.000000
57004     57004     gansu          104.8800       34.7300          101       140     2012      05        25        146              0.000000      14.914093       0.041809       0.295026       0.155000       0.269900       0.118000       0.208000
57004     57004     gansu          104.8800       34.7300          101       140     2012      05        26        147              0.195000      14.510345       1.930804       0.289982       0.137500       0.057800       0.106000   -9999.000000
57004     57004     gansu          104.8800       34.7300          101       140     2012      05        27        148              0.183000      19.273804       1.211436       0.280088       0.135000       0.148000   -9999.000000       0.178000
57004     57004     gansu          104.8800       34.7300          101       140     2012      05        28        149              0.219875      20.450897      16.522547       0.273834       0.164000   -9999.000000   -9999.000000       0.907000
57004     57004     gansu          104.8800       34.7300          101       140     2012      05        29        150              0.245792      15.003357       0.716803       0.330774   -9999.000000   -9999.000000       0.125800   -9999.000000
57004     57004     gansu          104.8800       34.7300          101       140     2012      05        30        151              0.219958      18.395935       0.039686       0.314088       0.140000       0.193200       0.117700   -9999.000000
57004     57004     gansu          104.8800       34.7300          101       140     2012      05        31        152              0.197625      19.605896       0.042528       0.299220       0.140000   -9999.000000       0.113500   -9999.000000
57004     57004     gansu          104.8800       34.7300          101       140     2012      06        01        153              0.186125      16.917389       0.000000       0.293362       0.132500       0.133300       0.108200       0.183000
57004     57004     gansu          104.8800       34.7300          101       140     2012      06        02        154              0.171083      19.981293       0.073399       0.283849       0.126000   -9999.000000   -9999.000000       0.226000
57004     57004     gansu          104.8800       34.7300          101       140     2012      06        03        155              0.161375      17.568237       0.000000       0.282746   -9999.000000       0.143600   -9999.000000       0.183000
57004     57004     gansu          104.8800       34.7300          101       140     2012      06        04        156              0.151708      19.671814       0.494309       0.276816       0.141000       0.187400       0.133600       0.184000
57004     57004     gansu          104.8800       34.7300          101       140     2012      06        05        157              0.150833      19.298492       4.967461       0.270351       0.185500   -9999.000000       0.147700   -9999.000000
57004     57004     gansu          104.8800       34.7300          101       140     2012      06        06        158              0.153375      15.851288       0.198870       0.301563       0.142000   -9999.000000       0.122000       0.333000
57004     57004     gansu          104.8800       34.7300          101       140     2012      06        07        159              0.151042      18.556213       0.000000       0.287742       0.130000       0.237600   -9999.000000       0.202000
57004     57004     gansu          104.8800       34.7300          101       140     2012      06        08        160              0.146000      21.283417       5.764359       0.275582       0.147000       0.198000   -9999.000000       0.286000
57004     57004     gansu          104.8800       34.7300          101       140     2012      06        09        161              0.149958      17.647461       0.000000       0.302931       0.132000       0.231500       0.117800       0.266000
57004     57004     gansu          104.8800       34.7300          101       140     2012      06        10        162              0.143667      21.170868       4.299198       0.284134       0.122000   -9999.000000       0.128300   -9999.000000
57004     57004     gansu          104.8800       34.7300          101       140     2012      06        11        163              0.000000      19.860779       0.872277       0.296461       0.161000       0.240900       0.121900       0.282000
57004     57004     gansu          104.8800       34.7300          101       140     2012      06        12        164              0.131500      20.393524       0.560145       0.281671       0.147000       0.177400       0.122600   -9999.000000
57004     57004     gansu          104.8800       34.7300          101       140     2012      06        13        165              0.126667      21.056732       0.228813       0.270719       0.145000   -9999.000000   -9999.000000       0.249000
57004     57004     gansu          104.8800       34.7300          101       140     2012      06        14        166              0.122083      22.010986       0.000000       0.261927       0.141000       0.055600       0.122100       0.133000
57004     57004     gansu          104.8800       34.7300          101       140     2012      06        15        167              0.117500      21.804779       0.120792       0.252013       0.155000   -9999.000000       0.116600   -9999.000000
57004     57004     gansu          104.8800       34.7300          101       140     2012      06        16        168              0.114875      20.531891       0.000000       0.246303       0.144500   -9999.000000       0.123700       0.233000
57004     57004     gansu          104.8800       34.7300          101       140     2012      06        17        169              0.112583      21.763977       0.000000       0.237688       0.144500       0.228200       0.114500   -9999.000000
57004     57004     gansu          104.8800       34.7300          101       140     2012      06        18        170              0.110917      20.783020       0.253615       0.234745       0.135000   -9999.000000       0.110800       0.333000
57004     57004     gansu          104.8800       34.7300          101       140     2012      06        19        171              0.108750      23.008606       3.034108       0.228998   -9999.000000       0.099000   -9999.000000   -9999.000000
57004     57004     gansu          104.8800       34.7300          101       140     2012      06        20        172              0.108375      23.448456       1.178789       0.239734       0.166000   -9999.000000       0.133400   -9999.000000
57004     57004     gansu          104.8800       34.7300          101       140     2012      06        21        173              0.110417      24.081635       0.165000       0.244747       0.154500   -9999.000000       0.127800       0.305000
57004     57004     gansu          104.8800       34.7300          101       140     2012      06        22        174              0.112500      24.537262       0.299166       0.235788       0.170000       0.129500       0.110500   -9999.000000
57004     57004     gansu          104.8800       34.7300          101       140     2012      06        23        175              0.110958      25.493774       4.881583       0.221348       0.158000   -9999.000000       0.122800       0.507000
57004     57004     gansu          104.8800       34.7300          101       140     2012      06        24        176              0.107458      24.071838       0.447785       0.239440       0.204000       0.288200   -9999.000000   -9999.000000
57004     57004     gansu          104.8800       34.7300          101       140     2012      06        25        177              0.107708      21.204773       0.296044       0.253267       0.182000       0.104000       0.144600       0.227000
57004     57004     gansu          104.8800       34.7300          101       140     2012      06        26        178              0.105833      22.224274       4.235599       0.240547       0.187000       0.304200       0.158400       0.416000
57004     57004     gansu          104.8800       34.7300          101       140     2012      06        27        179              0.119375      20.424133      17.671360       0.250512       0.227500       0.181200       0.172700   -9999.000000
57004     57004     gansu          104.8800       34.7300          101       140     2012      06        28        180              0.225792      19.226959      19.113842       0.312103       0.238000   -9999.000000       0.170400       0.971000
57004     57004     gansu          104.8800       34.7300          101       140     2012      06        29        181              0.261583      18.287537       0.800674       0.351485       0.226000       0.167400       0.167000   -9999.000000
57004     57004     gansu          104.8800       34.7300          101       140     2012      06        30        182              0.231250      18.980804       0.955860       0.338460       0.201000       0.181800   -9999.000000   -9999.000000
57004     57004     gansu          104.8800       34.7300          101       140     2012      07        01        183              0.205167      22.311615       0.938150       0.316086       0.181000       0.185900       0.144400       0.428000
57004     57004     gansu          104.8800       34.7300          101       140     2012      07        02        184              0.235167      23.259186       6.885002       0.304670       0.185500       0.156900       0.154900       0.736000
57004     57004     gansu          104.8800       34.7300          101       140     2012      07        03        185              0.240292      21.438080       2.957709       0.324444       0.167000   -9999.000000       0.158200       0.786000
57004     57004     gansu          104.8800       34.7300          101       140     2012      07        04        186              0.222417      20.570099       2.386132       0.321990       0.167000   -9999.000000       0.133300   -9999.000000
57004     57004     gansu          104.8800       34.7300          101       140     2012      07        05        187              0.196958      21.456879       0.884800       0.316354   -9999.000000       0.180200   -9999.000000       0.411000
57004     57004     gansu          104.8800       34.7300          101       140     2012      07        06        188              0.197375      23.398132       8.416917       0.301454   -9999.000000   -9999.000000   -9999.000000       0.815000
57004     57004     gansu          104.8800       34.7300          101       140     2012      07        07        189              0.209000      19.437592       0.893159       0.323979   -9999.000000       0.121200       0.141700       0.803000
57004     57004     gansu          104.8800       34.7300          101       140     2012      07        08        190              0.273167      23.028900      21.927111       0.314194       0.224000   -9999.000000       0.169400       0.934000
57004     57004     gansu          104.8800       34.7300          101       140     2012      07        09        191              0.254125      18.844269       0.271685       0.363308   -9999.000000       0.390000       0.174000   -9999.000000
57004     57004     gansu          104.8800       34.7300          101       140     2012      07        10        192              0.227500      20.049774       0.000000       0.335507   -9999.000000       0.311200       0.148600       0.553000
57004     57004     gansu          104.8800       34.7300          101       140     2012      07        11        193              0.205958      23.476166       0.385362       0.321420       0.218000   -9999.000000   -9999.000000   -9999.000000
57004     57004     gansu          104.8800       34.7300          101       140     2012      07        12        194              0.191375      19.982147       0.106933       0.318758       0.173500       0.172700       0.153800       0.431000
57004     57004     gansu          104.8800       34.7300          101       140     2012      07        13        195              0.197083      22.442383       3.872662       0.309406       0.172000       0.344500       0.148800       0.637000
57004     57004     gansu          104.8800       34.7300          101       140     2012      07        14        196              0.206542      22.736359       0.000000       0.313516       0.160000       0.033000       0.151200   -9999.000000
57004     57004     gansu          104.8800       34.7300          101       140     2012      07        15        197              0.181333      23.168793       0.000000       0.305178       0.167000       0.098100       0.124000       0.380000
57004     57004     gansu          104.8800       34.7300          101       140     2012      07        16        198              0.160167      24.036896       0.262873       0.295210       0.163000   -9999.000000       0.096400   -9999.000000
57004     57004     gansu          104.8800       34.7300          101       140     2012      07        17        199              0.215167      22.810760      10.122585       0.289693       0.206000       0.200800   -9999.000000       0.828000
57004     57004     gansu          104.8800       34.7300          101       140     2012      07        18        200              0.220708      19.720734       0.000000       0.328932       0.185000       0.129500       0.115100   -9999.000000
57004     57004     gansu          104.8800       34.7300          101       140     2012      07        19        201              0.200167      21.847137       0.162107       0.311423       0.197000       0.220300       0.108300   -9999.000000
57004     57004     gansu          104.8800       34.7300          101       140     2012      07        20        202              0.185542      21.564484       1.414249       0.306056       0.177000       0.223900       0.098200       0.514000
57004     57004     gansu          104.8800       34.7300          101       140     2012      07        21        203              0.269000      22.774475      15.546728       0.302064   -9999.000000   -9999.000000       0.126400   -9999.000000
57004     57004     gansu          104.8800       34.7300          101       140     2012      07        22        204              0.247500      19.234802       0.000000       0.349504       0.198000       0.405600   -9999.000000       0.648000
57004     57004     gansu          104.8800       34.7300          101       140     2012      07        23        205              0.222250      21.904205       4.143917       0.322802       0.182000       0.258100   -9999.000000   -9999.000000
57004     57004     gansu          104.8800       34.7300          101       140     2012      07        24        206              0.264958      20.569244      30.115822       0.313520       0.188000       0.328100       0.125700       0.474000
57004     57004     gansu          104.8800       34.7300          101       140     2012      07        25        207              0.288750      21.083008       4.463134       0.354191       0.162000       0.408000       0.130800       0.792000
57004     57004     gansu          104.8800       34.7300          101       140     2012      07        26        208              0.257458      22.776001       2.964837       0.348531       0.179000   -9999.000000       0.106100   -9999.000000
57004     57004     gansu          104.8800       34.7300          101       140     2012      07        27        209              0.232417      23.285522       0.037442       0.335873       0.185000       0.125500       0.102600       0.546000
57004     57004     gansu          104.8800       34.7300          101       140     2012      07        28        210              0.213083      23.329529       0.000000       0.328559       0.176000       0.157800   -9999.000000   -9999.000000
57004     57004     gansu          104.8800       34.7300          101       140     2012      07        29        211              0.198292      23.149048       0.662012       0.322112       0.161000   -9999.000000       0.126200       0.512000
57004     57004     gansu          104.8800       34.7300          101       140     2012      07        30        212              0.187042      24.065826       7.329671       0.315617       0.229000       0.114600       0.130200       0.828000
57004     57004     gansu          104.8800       34.7300          101       140     2012      07        31        213              0.220583      20.056213      10.700871       0.335960   -9999.000000       0.304800       0.157500       0.980000
57004     57004     gansu          104.8800       34.7300          101       140     2012      08        01        214              0.225833      19.338898       0.751136       0.353722   -9999.000000       0.239700       0.153400       0.665000
57004     57004     gansu          104.8800       34.7300          101       140     2012      08        02        215              0.208500      20.580597       0.279618       0.333552       0.178000       0.165300       0.122900   -9999.000000
57004     57004     gansu          104.8800       34.7300          101       140     2012      08        03        216              0.189208      22.906372       0.000000       0.321315       0.140000   -9999.000000   -9999.000000       0.470000
57004     57004     gansu          104.8800       34.7300          101       140     2012      08        04        217              0.172750      23.746002       0.140254       0.314058       0.172000       0.139300       0.136600       0.580000
57004     57004     gansu          104.8800       34.7300          101       140     2012      08        05        218              0.162583      23.094147       0.871854       0.310243       0.162000       0.016900       0.139300       0.544000
57004     57004     gansu          104.8800       34.7300          101       140     2012      08        06        219              0.154750      21.908661       0.150307       0.312132       0.171000   -9999.000000       0.120500       0.394000
57004     57004     gansu          104.8800       34.7300          101       140     2012      08        07        220              0.145250      23.667572       0.000000       0.303783       0.153000       0.138700       0.123500   -9999.000000
57004     57004     gansu          104.8800       34.7300          101       140     2012      08        08        221              0.137417      22.966125       0.000000       0.300040       0.148500   -9999.000000   -9999.000000       0.419000
57004     57004     gansu          104.8800       34.7300          101       140     2012      08        09        222              0.130042      24.726715       0.000000       0.292006       0.146000   -9999.000000   -9999.000000   -9999.000000
57004     57004     gansu          104.8800       34.7300          101       140     2012      08        10        223              0.124083      24.956787       0.000000       0.284794       0.133000       0.028200       0.117300       0.401000
57004     57004     gansu          104.8800       34.7300          101       140     2012      08        11        224              0.118792      25.299622       1.346418       0.277813       0.144000   -9999.000000       0.128500       0.537000
57004     57004     gansu          104.8800       34.7300          101       140     2012      08        12        225              0.120000      23.407776      10.386362       0.283765       0.173000       0.059100       0.122600   -9999.000000
57004     57004     gansu          104.8800       34.7300          101       140     2012      08        13        226              0.210708      22.901703      18.541571       0.305703       0.181000   -9999.000000       0.166400       1.000000
57004     57004     gansu          104.8800       34.7300          101       140     2012      08        14        227              0.216208      20.764618       0.368960       0.354534       0.146500       0.124800   -9999.000000   -9999.000000
57004     57004     gansu          104.8800       34.7300          101       140     2012      08        15        228              0.197750      21.746613       2.680523       0.337898       0.131500       0.145900       0.140000       0.550000
57004     57004     gansu          104.8800       34.7300          101       140     2012      08        16        229              0.181125      23.187012      18.605366       0.321018       0.126000   -9999.000000       0.152300   -9999.000000
57004     57004     gansu          104.8800       34.7300          101       140     2012      08        17        230              0.275125      22.570831      18.542229       0.336015   -9999.000000       0.294100       0.147600   -9999.000000
57004     57004     gansu          104.8800       34.7300          101       140     2012      08        18        231              0.330792      18.921967      17.798365       0.373654       0.202000       0.244100       0.184900       1.000000
57004     57004     gansu          104.8800       34.7300          101       140     2012      08        19        232              0.294000      17.620789       1.390841       0.379895       0.178500       0.221300       0.177900   -9999.000000
57004     57004     gansu          104.8800       34.7300          101       140     2012      08        20        233              0.287583      20.839569      10.360623       0.353853       0.164500       0.256600   -9999.000000       0.788000
57004     57004     gansu          104.8800       34.7300          101       140     2012      08        21        234              0.294417      21.294800       0.593213       0.355809       0.172000   -9999.000000       0.161700   -9999.000000
57004     57004     gansu          104.8800       34.7300          101       140     2012      08        22        235              0.270667      20.093964       1.493662       0.348070       0.153000       0.208300       0.164700   -9999.000000
57004     57004     gansu          104.8800       34.7300          101       140     2012      08        23        236              0.253667      19.706757       0.000000       0.338586       0.182000       0.197800       0.123900       0.631000
57004     57004     gansu          104.8800       34.7300          101       140     2012      08        24        237              0.238750      19.981720       0.000000       0.332329   -9999.000000       0.223300       0.123800   -9999.000000
57004     57004     gansu          104.8800       34.7300          101       140     2012      08        25        238              0.000000      20.499725      10.033365       0.327423       0.160000   -9999.000000   -9999.000000       0.967000
57004     57004     gansu          104.8800       34.7300          101       140     2012      08        26        239              0.232417      20.949219       1.988313       0.340686       0.161500   -9999.000000       0.157500   -9999.000000
57004     57004     gansu          104.8800       34.7300          101       140     2012      08        27        240              0.346083      21.651703      14.883941       0.336211       0.160000       0.162100       0.156900       0.995000
57004     57004     gansu          104.8800       34.7300          101       140     2012      08        28        241              0.303875      18.446198       0.000000       0.366507   -9999.000000       0.369400       0.149600       0.670000
57004     57004     gansu          104.8800       34.7300          101       140     2012      08        29        242              0.284417      20.920898       0.000000       0.339030       0.164000       0.070500       0.113200       0.601000
57004     57004     gansu          104.8800       34.7300          101       140     2012      08        30        243              0.280500      21.201721       6.043800       0.330697       0.168500       0.278900       0.123800       0.786000
57004     57004     gansu          104.8800       34.7300          101       140     2012      08        31        244              0.305583      20.463226      16.730074       0.334823       0.181000   -9999.000000   -9999.000000   -9999.000000
57004     57004     gansu          104.8800       34.7300          101       140     2012      09        01        245              0.341583      18.703369       8.738682       0.354534       0.162000       0.100600       0.156500       1.000000
57004     57004     gansu          104.8800       34.7300          101       140     2012      09        02        246              0.311375      15.469543       0.361995       0.368091       0.139000       0.245600       0.154000       0.789000
57004     57004     gansu          104.8800       34.7300          101       140     2012      09        03        247              0.295417      18.172302       0.545901       0.346689       0.157000   -9999.000000       0.122500       0.858000
57004     57004     gansu          104.8800       34.7300          101       140     2012      09        04        248              0.282208      18.978882       0.128631       0.337578       0.156000       0.295100       0.105600       0.663000
57004     57004     gansu          104.8800       34.7300          101       140     2012      09        05        249              0.273250      18.429871       1.222154       0.332754       0.138000       0.105100       0.107500   -9999.000000
57004     57004     gansu          104.8800       34.7300          101       140     2012      09        06        250              0.268750      18.692047       1.219775       0.331206       0.132000       0.214400   -9999.000000       0.753000
57004     57004     gansu          104.8800       34.7300          101       140     2012      09        07        251              0.307792      19.311462      15.960345       0.328761   -9999.000000       0.295600       0.128200   -9999.000000
57004     57004     gansu          104.8800       34.7300          101       140     2012      09        08        252              0.299542      17.288727       0.000000       0.359563       0.172000   -9999.000000       0.129000       0.762000
57004     57004     gansu          104.8800       34.7300          101       140     2012      09        09        253              0.295042      19.432526       4.287138       0.341656       0.182000       0.317300       0.118000       0.999000
57004     57004     gansu          104.8800       34.7300          101       140     2012      09        10        254              0.298667      17.390717       1.185084       0.344723       0.177000       0.280700       0.110100   -9999.000000
57004     57004     gansu          104.8800       34.7300          101       140     2012      09        11        255              0.288417      16.517914       0.087870       0.342871       0.172000       0.178200   -9999.000000       0.924000
57004     57004     gansu          104.8800       34.7300          101       140     2012      09        12        256              0.280542      14.568817       0.000000       0.335996       0.157000       0.367500       0.107700   -9999.000000
57004     57004     gansu          104.8800       34.7300          101       140     2012      09        13        257              0.272208      11.719086       0.000000       0.332296   -9999.000000   -9999.000000       0.094300       0.612000
57004     57004     gansu          104.8800       34.7300          101       140     2012      09        14        258              0.263125      14.353424       0.000000       0.326200       0.145000       0.358600       0.091100   -9999.000000
57004     57004     gansu          104.8800       34.7300          101       140     2012      09        15        259              0.254833      14.992706       0.000000       0.322295       0.138000       0.146300       0.087300   -9999.000000
57004     57004     gansu          104.8800       34.7300          101       140     2012      09        16        260              0.248375      14.542786       0.050938       0.320656       0.137500       0.065900       0.090000       0.649000
57004     57004     gansu          104.8800       34.7300          101       140     2012      09        17        261              0.243083      14.095978       0.000000       0.319953       0.118000       0.151100   -9999.000000   -9999.000000
57004     57004     gansu          104.8800       34.7300          101       140     2012      09        18        262              0.235333      16.003540       0.000000       0.316325       0.124000   -9999.000000       0.092200       0.504000
57004     57004     gansu          104.8800       34.7300          101       140     2012      09        19        263              0.227458      16.410248       0.000000       0.312940       0.129000   -9999.000000       0.089600   -9999.000000
57004     57004     gansu          104.8800       34.7300          101       140     2012      09        20        264              0.220667      16.978424       0.558557       0.309277       0.166000       0.047200       0.099400       0.706000
57004     57004     gansu          104.8800       34.7300          101       140     2012      09        21        265              0.217500      13.918945       0.000000       0.313368   -9999.000000       0.133900       0.086500       0.517000
57004     57004     gansu          104.8800       34.7300          101       140     2012      09        22        266              0.210750      16.779358       0.092360       0.307350       0.106500       0.171000   -9999.000000   -9999.000000
57004     57004     gansu          104.8800       34.7300          101       140     2012      09        23        267              0.206833      16.975006       0.830490       0.304858       0.110000       0.057800   -9999.000000       0.437000
57004     57004     gansu          104.8800       34.7300          101       140     2012      09        24        268              0.220542      16.783234      12.178977       0.307741   -9999.000000       0.291200       0.101400   -9999.000000
57004     57004     gansu          104.8800       34.7300          101       140     2012      09        25        269              0.178043      13.388763       0.982330       0.337134       0.165000       0.375800       0.098300       0.920000
57004     57004     gansu          104.8800       34.7300          101       140     2012      09        26        270              0.130042      13.587036       0.000000       0.335396       0.134500   -9999.000000       0.075600       0.688000
57004     57004     gansu          104.8800       34.7300          101       140     2012      09        27        271              0.124000      15.606537       0.000000       0.323978       0.128000       0.292200       0.084200       0.664000
57004     57004     gansu          104.8800       34.7300          101       140     2012      09        28        272              0.116467      14.218353       0.000000       0.320091       0.115000   -9999.000000   -9999.000000       0.467000
57004     57004     gansu          104.8800       34.7300          101       140     2012      09        29        273              0.139292      13.658569       2.739613       0.314928       0.134000       0.118300       0.092000   -9999.000000
57004     57004     gansu          104.8800       34.7300          101       140     2012      09        30        274              0.113292      13.878601       0.000000       0.320873       0.121000   -9999.000000       0.072200       0.503000
57004     57004     gansu          104.8800       34.7300          101       140     2012      10        01        275              0.108417      15.451019       0.000000       0.316220       0.109000   -9999.000000       0.090400       0.558000
57004     57004     gansu          104.8800       34.7300          101       140     2012      10        02        276              0.105583      13.982239       2.440877       0.314390       0.119000   -9999.000000       0.093600       0.498000
57004     57004     gansu          104.8800       34.7300          101       140     2012      10        03        277              0.106333      12.564392       3.277888       0.322332       0.108000       0.324200       0.083700       0.421000
57004     57004     gansu          104.8800       34.7300          101       140     2012      10        04        278              0.112208      14.684601       0.000000       0.319570       0.126000       0.174900   -9999.000000   -9999.000000
57004     57004     gansu          104.8800       34.7300          101       140     2012      10        05        279              0.109417      12.311127       0.000000       0.322194       0.112000       0.158000       0.087000       0.565000
57004     57004     gansu          104.8800       34.7300          101       140     2012      10        06        280              0.104000      13.375366       0.000000       0.315683       0.110000   -9999.000000       0.091800   -9999.000000
57004     57004     gansu          104.8800       34.7300          101       140     2012      10        07        281              0.101667      11.486938       0.345947       0.314783       0.108500   -9999.000000       0.077500       0.452000
57004     57004     gansu          104.8800       34.7300          101       140     2012      10        08        282              0.099750      12.947784       4.093865       0.313669       0.128000       0.259000       0.085100       0.857000
57004     57004     gansu          104.8800       34.7300          101       140     2012      10        09        283              0.103458      10.731720       0.291970       0.326402       0.116000       0.225500   -9999.000000   -9999.000000
57004     57004     gansu          104.8800       34.7300          101       140     2012      10        10        284              0.099792      12.411621       0.000000       0.318837   -9999.000000       0.107100   -9999.000000       0.517000
57004     57004     gansu          104.8800       34.7300          101       140     2012      10        11        285              0.098000      12.848114       0.671582       0.314117       0.106000   -9999.000000       0.071800   -9999.000000
57004     57004     gansu          104.8800       34.7300          101       140     2012      10        12        286              0.097042      11.294403       0.000000       0.316332       0.098500       0.155600       0.072000       0.509000
57004     57004     gansu          104.8800       34.7300          101       140     2012      10        13        287              0.093708      12.723572       0.000000       0.313118       0.089500       0.204400       0.056300   -9999.000000
57004     57004     gansu          104.8800       34.7300          101       140     2012      10        14        288              0.091125      12.654907       1.013905       0.309516       0.091000   -9999.000000       0.065800   -9999.000000
57004     57004     gansu          104.8800       34.7300          101       140     2012      10        15        289              0.112083      12.675018      13.192634       0.310909       0.102000       0.150500   -9999.000000       1.000000
57004     57004     gansu          104.8800       34.7300          101       140     2012      10        16        290              0.138417      11.130707       0.539750       0.336456   -9999.000000       0.273400       0.080700   -9999.000000
57004     57004     gansu          104.8800       34.7300          101       140     2012      10        17        291              0.127292       9.227905       0.119602       0.334752   -9999.000000       0.154000       0.085600       0.577000
57004     57004     gansu          104.8800       34.7300          101       140     2012      10        18        292              0.122250      10.512207       1.273547       0.326092       0.108000       0.221100       0.093100   -9999.000000
57004     57004     gansu          104.8800       34.7300          101       140     2012      10        19        293              0.116292      10.065552       0.000000       0.326865       0.103500   -9999.000000       0.084700       0.695000
57004     57004     gansu          104.8800       34.7300          101       140     2012      10        20        294              0.112750      10.467529       0.023116       0.322432       0.094000   -9999.000000       0.081300       0.621000
57004     57004     gansu          104.8800       34.7300          101       140     2012      10        21        295              0.106125      11.842499       0.449516       0.319784   -9999.000000       0.206000   -9999.000000   -9999.000000
57004     57004     gansu          104.8800       34.7300          101       140     2012      10        22        296              0.103125       5.855743       0.153526       0.320115   -9999.000000       0.190400       0.082500       0.460000
57004     57004     gansu          104.8800       34.7300          101       140     2012      10        23        297              0.099542       8.533356       0.000000       0.316263   -9999.000000       0.245600       0.087500   -9999.000000
57004     57004     gansu          104.8800       34.7300          101       140     2012      10        24        298              0.097458       8.020447       0.000000       0.315262   -9999.000000   -9999.000000       0.069700       0.448000
57004     57004     gansu          104.8800       34.7300          101       140     2012      10        25        299              0.000000       9.164978       2.019313       0.312398       0.094000       0.132900       0.080200       0.483000
57004     57004     gansu          104.8800       34.7300          101       140     2012      10        26        300              0.092667       9.540070       0.000000       0.315938       0.114000       0.178900   -9999.000000       0.611000
57004     57004     gansu          104.8800       34.7300          101       140     2012      10        27        301              0.090958       9.887238       0.100671       0.314194       0.107000       0.204800   -9999.000000       0.419000
57004     57004     gansu          104.8800       34.7300          101       140     2012      10        28        302              0.000000      11.006592       3.596332       0.311182       0.120000       0.145900       0.085000   -9999.000000
57004     57004     gansu          104.8800       34.7300          101       140     2012      10        29        303              0.091583      11.570984       1.132850       0.319565       0.115000   -9999.000000       0.085800       0.621000
57004     57004     gansu          104.8800       34.7300          101       140     2012      10        30        304              0.089917       8.525787       0.220482       0.317122       0.116000       0.144100       0.071300       0.432000
57004     57004     gansu          104.8800       34.7300          101       140     2012      10        31        305              0.087667       8.029114       0.000000       0.313191       0.113000       0.218000       0.083800       0.341000
57004     57004     gansu          104.8800       34.7300          101       140     2012      11        01        306              0.085875       8.140442       0.283785       0.310487   -9999.000000   -9999.000000   -9999.000000       0.331000
57004     57004     gansu          104.8800       34.7300          101       140     2012      11        02        307              0.084000       8.545074       0.141936       0.309652   -9999.000000       0.213100       0.074800   -9999.000000
57004     57004     gansu          104.8800       34.7300          101       140     2012      11        03        308              0.082083       6.130066       0.030719       0.298105       0.101000       0.245600       0.074600       0.277000
57004     57004     gansu          104.8800       34.7300          101       140     2012      11        04        309              0.080917       3.274994       1.098932       0.287454       0.093000       0.158600       0.080700   -9999.000000
57004     57004     gansu          104.8800       34.7300          101       140     2012      11        05        310              0.080042       4.332855       0.000000       0.295392       0.093000       0.087900       0.077700       0.314000
57004     57004     gansu          104.8800       34.7300          101       140     2012      11        06        311              0.079333       5.525146       0.097384       0.300862   -9999.000000   -9999.000000   -9999.000000       0.296000
57004     57004     gansu          104.8800       34.7300          101       140     2012      11        07        312              0.078625       5.450256       0.994194       0.304775   -9999.000000   -9999.000000   -9999.000000   -9999.000000
57004     57004     gansu          104.8800       34.7300          101       140     2012      11        08        313              0.078125       4.422211       0.041609       0.300486       0.102500   -9999.000000       0.093000       0.374000
57004     57004     gansu          104.8800       34.7300          101       140     2012      11        09        314              0.077583       4.408081       0.155256       0.303190       0.106000   -9999.000000       0.081900   -9999.000000
57004     57004     gansu          104.8800       34.7300          101       140     2012      11        10        315              0.076167       4.120178       0.000000       0.299563       0.098000   -9999.000000       0.071800       0.201000
57004     57004     gansu          104.8800       34.7300          101       140     2012      11        11        316              0.075458       1.777588       0.000000       0.259721       0.094000   -9999.000000       0.075000   -9999.000000
57004     57004     gansu          104.8800       34.7300          101       140     2012      11        12        317              0.075708       2.885620       0.000000       0.279619   -9999.000000       0.091900   -9999.000000   -9999.000000
57004     57004     gansu          104.8800       34.7300          101       140     2012      11        13        318              0.000000       4.372742       0.000000       0.292869       0.094000       0.053800       0.080600       0.334000
57004     57004     gansu          104.8800       34.7300          101       140     2012      11        14        319              0.075000       5.267578       0.293474       0.299599       0.101000   -9999.000000       0.081300   -9999.000000
57004     57004     gansu          104.8800       34.7300          101       140     2012      11        15        320              0.075000       4.552917       0.122816       0.304233   -9999.000000   -9999.000000       0.079800       0.549000
57004     57004     gansu          104.8800       34.7300          101       140     2012      11        16        321              0.075174       3.025024       0.000000       0.295800       0.091000       0.059000       0.074400   -9999.000000
57004     57004     gansu          104.8800       34.7300          101       140     2012      11        17        322              0.000000       4.377808       0.000000       0.294373   -9999.000000       0.059800       0.078400       0.303000
57004     57004     gansu          104.8800       34.7300          101       140     2012      11        18        323              0.074542       4.773163       0.000000       0.297343   -9999.000000       0.072300   -9999.000000       0.332000
57004     57004     gansu          104.8800       34.7300          101       140     2012      11        19        324              0.074000       4.172211       0.000000       0.294614       0.086000   -9999.000000       0.068600   -9999.000000
57004     57004     gansu          104.8800       34.7300          101       140     2012      11        20        325              0.073250       3.739807       0.000000       0.290914       0.083000   -9999.000000       0.074600       0.273000
57004     57004     gansu          104.8800       34.7300          101       140     2012      11        21        326              0.072208       3.656494       0.000000       0.292879       0.077000       0.056100       0.064700   -9999.000000
57004     57004     gansu          104.8800       34.7300          101       140     2012      11        22        327              0.070958       4.209320       0.000000       0.291781   -9999.000000       0.090000       0.066400       0.214000
57004     57004     gansu          104.8800       34.7300          101       140     2012      11        23        328              0.070583       0.993408       0.000000       0.247866   -9999.000000       0.084100   -9999.000000       0.201000
57004     57004     gansu          104.8800       34.7300          101       140     2012      11        24        329              0.070500       0.972748       0.000000       0.241114   -9999.000000   -9999.000000   -9999.000000       0.174000
57004     57004     gansu          104.8800       34.7300          101       140     2012      11        25        330              0.069958       0.285736       0.024896       0.226900   -9999.000000       0.063900       0.062900       0.181000
57004     57004     gansu          104.8800       34.7300          101       140     2012      11        26        331              0.068250      -0.822479       0.000000       0.206793       0.080000   -9999.000000       0.049100   -9999.000000
57004     57004     gansu          104.8800       34.7300          101       140     2012      11        27        332              0.066542      -0.490875       0.000000       0.207948   -9999.000000       0.127800       0.064600       0.082000
57004     57004     gansu          104.8800       34.7300          101       140     2012      11        28        333              0.066625      -0.719788       0.067404       0.202115   -9999.000000       0.079900       0.067800       0.146000
57004     57004     gansu          104.8800       34.7300          101       140     2012      11        29        334              0.067042       0.249329       0.000000       0.219232   -9999.000000   -9999.000000   -9999.000000       0.150000
57004     57004     gansu          104.8800       34.7300          101       140     2012      11        30        335              0.067208       0.218658       0.062329       0.220537   -9999.000000   -9999.000000       0.067200       0.201000
57004     57004     gansu          104.8800       34.7300          101       140     2012      12        01        336              0.068208      -0.178802       0.042275       0.205570       0.088000   -9999.000000       0.069300   -9999.000000
57004     57004     gansu          104.8800       34.7300          101       140     2012      12        02        337              0.067792       0.362823       0.000000       0.226085       0.083000   -9999.000000       0.075500       0.126000
57004     57004     gansu          104.8800       34.7300          101       140     2012      12        03        338              0.067667      -0.418854       0.000000       0.212386   -9999.000000       0.048900       0.070800   -9999.000000
57004     57004     gansu          104.8800       34.7300          101       140     2012      12        04        339              0.066292      -0.834595       0.000000       0.201428   -9999.000000   -9999.000000       0.068400       0.057000
57004     57004     gansu          104.8800       34.7300          101       140     2012      12        05        340              0.065875      -0.092957       0.074695       0.214128       0.085000       0.089100   -9999.000000       0.050000
57004     57004     gansu          104.8800       34.7300          101       140     2012      12        06        341              0.065625      -0.046265       0.090167       0.215055       0.083000       0.049100       0.065700   -9999.000000
57004     57004     gansu          104.8800       34.7300          101       140     2012      12        07        342              0.065125       0.069275       0.000000       0.218150       0.079000   -9999.000000       0.068800       0.065000
57004     57004     gansu          104.8800       34.7300          101       140     2012      12        08        343              0.064583      -0.118408       0.000000       0.215018       0.081000       0.056900       0.060000   -9999.000000
57004     57004     gansu          104.8800       34.7300          101       140     2012      12        09        344              0.064292      -0.022675       0.000000       0.215289   -9999.000000       0.055500       0.069900       0.079000
57004     57004     gansu          104.8800       34.7300          101       140     2012      12        10        345              0.064625      -0.102753       0.000000       0.213040   -9999.000000       0.081300   -9999.000000   -9999.000000
57004     57004     gansu          104.8800       34.7300          101       140     2012      12        11        346              0.065125       0.336121       0.000000       0.222005       0.079000   -9999.000000   -9999.000000   -9999.000000
57004     57004     gansu          104.8800       34.7300          101       140     2012      12        12        347              0.065833       0.963074       0.064785       0.234127       0.085000   -9999.000000       0.067900       0.182000
57004     57004     gansu          104.8800       34.7300          101       140     2012      12        13        348              0.065500       0.588562       0.000000       0.229020       0.071000   -9999.000000       0.072100   -9999.000000
57004     57004     gansu          104.8800       34.7300          101       140     2012      12        14        349              0.065292       0.650757       0.000000       0.233705   -9999.000000   -9999.000000       0.065200       0.174000
57004     57004     gansu          104.8800       34.7300          101       140     2012      12        15        350              0.000000       1.531769       0.000000       0.245704   -9999.000000       0.054600       0.070600   -9999.000000
57004     57004     gansu          104.8800       34.7300          101       140     2012      12        16        351              0.064917       0.839752       0.000000       0.237083       0.080000       0.117100   -9999.000000       0.049000
57004     57004     gansu          104.8800       34.7300          101       140     2012      12        17        352              0.064417       0.623749       0.171492       0.234201       0.080000   -9999.000000       0.066400       0.005000
57004     57004     gansu          104.8800       34.7300          101       140     2012      12        18        353              0.064042      -0.820374       0.000000       0.204340       0.072000   -9999.000000       0.063400   -9999.000000
57004     57004     gansu          104.8800       34.7300          101       140     2012      12        19        354              0.064833      -0.300934       0.000000       0.206844   -9999.000000   -9999.000000       0.070500       0.118000
57004     57004     gansu          104.8800       34.7300          101       140     2012      12        20        355              0.000000      -0.576782       0.000000       0.196930   -9999.000000       0.070400       0.067800   -9999.000000
57004     57004     gansu          104.8800       34.7300          101       140     2012      12        21        356              0.063292      -2.001770       0.000000       0.178377   -9999.000000       0.126100       0.063000       0.100000
57004     57004     gansu          104.8800       34.7300          101       140     2012      12        22        357              0.061833      -2.264893       0.000000       0.178827   -9999.000000   -9999.000000   -9999.000000   -9999.000000
57004     57004     gansu          104.8800       34.7300          101       140     2012      12        23        358              0.060000      -5.517456       0.000000       0.152907       0.071000       0.079000       0.061300       0.013000
57004     57004     gansu          104.8800       34.7300          101       140     2012      12        24        359              0.060000      -5.004700       0.000000       0.150193       0.076000       0.077000       0.062900       0.035000
57004     57004     gansu          104.8800       34.7300          101       140     2012      12        25        360              0.060000      -3.725281       0.000000       0.161282   -9999.000000   -9999.000000       0.056400   -9999.000000
57004     57004     gansu          104.8800       34.7300          101       140     2012      12        26        361              0.000000      -2.662537       0.000000       0.169955   -9999.000000       0.110400       0.058800       0.008000
57004     57004     gansu          104.8800       34.7300          101       140     2012      12        27        362              0.060000      -2.869232       0.000000       0.173473   -9999.000000       0.081600   -9999.000000       0.005000
57004     57004     gansu          104.8800       34.7300          101       140     2012      12        28        363              0.000000      -4.714874       0.000000       0.148037   -9999.000000   -9999.000000       0.062100       0.032000
57004     57004     gansu          104.8800       34.7300          101       140     2012      12        29        364              0.000000      -6.397308       0.029384       0.147597   -9999.000000   -9999.000000       0.050700   -9999.000000
57004     57004     gansu          104.8800       34.7300          101       140     2012      12        30        365              0.000000      -7.747620       0.000000       0.140987   -9999.000000   -9999.000000       0.063600   -9999.000000
57004     57004     gansu          104.8800       34.7300          101       140     2012      12        31        366              0.060000      -6.603271       0.000000       0.144259   -9999.000000       0.089300       0.050900       0.043000
