# Supplementary material for: Research on Fusing Multisatellite Soil Moisture Data Based on Bayesian Model Averaging
Source: Hindawi journal article supplement (doi:10.1155/2018/9310838), 2018-06-25
Supplement: f1 [file 9310838.f1.zip › 2012_sm00-10cm_daily_ZDB_ZHY_57022_366days_allin.txt]

57022     57022     shaanxi        107.7833       34.6833          101       151     2012      01        01        001              0.000000   -9999.000000       0.000000   -9999.000000       0.084000   -9999.000000       0.046800   -9999.000000
57022     57022     shaanxi        107.7833       34.6833          101       151     2012      01        02        002              0.248917      -1.244965       0.000000       0.190988       0.090000   -9999.000000   -9999.000000       0.184000
57022     57022     shaanxi        107.7833       34.6833          101       151     2012      01        03        003              0.000000      -0.799896       0.000000       0.200465   -9999.000000   -9999.000000       0.054700   -9999.000000
57022     57022     shaanxi        107.7833       34.6833          101       151     2012      01        04        004              0.217435      -3.781067       0.000000       0.170626   -9999.000000   -9999.000000       0.059300       0.018000
57022     57022     shaanxi        107.7833       34.6833          101       151     2012      01        05        005              0.203000      -3.841553       0.000000       0.161836   -9999.000000   -9999.000000       0.051500   -9999.000000
57022     57022     shaanxi        107.7833       34.6833          101       151     2012      01        06        006              0.204542      -4.037659       0.000000       0.157708   -9999.000000   -9999.000000       0.057400       0.159000
57022     57022     shaanxi        107.7833       34.6833          101       151     2012      01        07        007              0.210167      -2.451172       0.192401       0.169079   -9999.000000   -9999.000000   -9999.000000       0.045000
57022     57022     shaanxi        107.7833       34.6833          101       151     2012      01        08        008              0.000000      -2.724091       0.000000       0.168069   -9999.000000   -9999.000000   -9999.000000   -9999.000000
57022     57022     shaanxi        107.7833       34.6833          101       151     2012      01        09        009              0.214042      -1.045135       0.000000       0.198531   -9999.000000   -9999.000000   -9999.000000       0.176000
57022     57022     shaanxi        107.7833       34.6833          101       151     2012      01        10        010              0.214417      -0.687256       0.000000       0.203097       0.080000   -9999.000000       0.047100   -9999.000000
57022     57022     shaanxi        107.7833       34.6833          101       151     2012      01        11        011              0.208542      -1.332062       0.000000       0.197158       0.083000   -9999.000000       0.040600       0.075000
57022     57022     shaanxi        107.7833       34.6833          101       151     2012      01        12        012              0.208667      -1.528381       0.000000       0.189410       0.092000   -9999.000000       0.045600   -9999.000000
57022     57022     shaanxi        107.7833       34.6833          101       151     2012      01        13        013              0.207667      -1.155792       0.000000       0.193843       0.090000   -9999.000000   -9999.000000   -9999.000000
57022     57022     shaanxi        107.7833       34.6833          101       151     2012      01        14        014              0.212500      -1.162445       0.000000       0.190804   -9999.000000   -9999.000000       0.047900       0.102000
57022     57022     shaanxi        107.7833       34.6833          101       151     2012      01        15        015              0.205875      -0.943176       0.000000       0.203693   -9999.000000   -9999.000000       0.044000   -9999.000000
57022     57022     shaanxi        107.7833       34.6833          101       151     2012      01        16        016              0.208083      -1.419617       0.038474       0.191818       0.088000   -9999.000000       0.042900       0.185000
57022     57022     shaanxi        107.7833       34.6833          101       151     2012      01        17        017              0.000000      -0.797852       0.000000       0.199462       0.080000   -9999.000000       0.039300   -9999.000000
57022     57022     shaanxi        107.7833       34.6833          101       151     2012      01        18        018              0.213250       0.192200       0.000000       0.217606   -9999.000000   -9999.000000       0.040000       0.023000
57022     57022     shaanxi        107.7833       34.6833          101       151     2012      01        19        019              0.219167      -0.538055       0.000000       0.202133   -9999.000000   -9999.000000   -9999.000000       0.103000
57022     57022     shaanxi        107.7833       34.6833          101       151     2012      01        20        020              0.230000      -1.452545       0.000000       0.181057   -9999.000000   -9999.000000       0.040000   -9999.000000
57022     57022     shaanxi        107.7833       34.6833          101       151     2012      01        21        021              0.245500      -1.410675       0.000000       0.185889   -9999.000000   -9999.000000       0.039600       0.040000
57022     57022     shaanxi        107.7833       34.6833          101       151     2012      01        22        022              0.253208      -4.303894       0.000000       0.155823   -9999.000000   -9999.000000       0.033400   -9999.000000
57022     57022     shaanxi        107.7833       34.6833          101       151     2012      01        23        023              0.249792      -7.451996       0.000000       0.141500   -9999.000000   -9999.000000       0.032200       0.031000
57022     57022     shaanxi        107.7833       34.6833          101       151     2012      01        24        024              0.242250      -7.491119       0.985294       0.138432   -9999.000000   -9999.000000   -9999.000000       0.078000
57022     57022     shaanxi        107.7833       34.6833          101       151     2012      01        25        025              0.216708      -7.776245       0.675907       0.137758   -9999.000000   -9999.000000   -9999.000000       0.052000
57022     57022     shaanxi        107.7833       34.6833          101       151     2012      01        26        026              0.209375      -5.486481       0.207656       0.151265       0.086000   -9999.000000       0.023000       0.116000
57022     57022     shaanxi        107.7833       34.6833          101       151     2012      01        27        027              0.209250      -2.959503       0.098215       0.175372       0.083000   -9999.000000       0.030700   -9999.000000
57022     57022     shaanxi        107.7833       34.6833          101       151     2012      01        28        028              0.219292      -1.102509       0.000000       0.195075       0.090000   -9999.000000       0.031100       0.249000
57022     57022     shaanxi        107.7833       34.6833          101       151     2012      01        29        029              0.224208       0.019379       0.000000       0.212649       0.090000   -9999.000000       0.034100       0.274000
57022     57022     shaanxi        107.7833       34.6833          101       151     2012      01        30        030              0.226583       0.095398       0.794158       0.216354   -9999.000000   -9999.000000   -9999.000000       0.341000
57022     57022     shaanxi        107.7833       34.6833          101       151     2012      01        31        031              0.233000       0.923981       1.637864       0.229184       0.101000   -9999.000000       0.034400       0.446000
57022     57022     shaanxi        107.7833       34.6833          101       151     2012      02        01        032              0.238333       2.255005       0.000000       0.244559       0.082000   -9999.000000       0.033100   -9999.000000
57022     57022     shaanxi        107.7833       34.6833          101       151     2012      02        02        033              0.230083       0.649384       0.000000       0.226130   -9999.000000   -9999.000000       0.035600       0.156000
57022     57022     shaanxi        107.7833       34.6833          101       151     2012      02        03        034              0.227292      -1.287872       0.000000       0.200052       0.096000   -9999.000000       0.045500   -9999.000000
57022     57022     shaanxi        107.7833       34.6833          101       151     2012      02        04        035              0.236708       0.547272       0.000000       0.220226   -9999.000000   -9999.000000       0.044600       0.182000
57022     57022     shaanxi        107.7833       34.6833          101       151     2012      02        05        036              0.249417       0.596802       0.000000       0.220791   -9999.000000   -9999.000000   -9999.000000       0.343000
57022     57022     shaanxi        107.7833       34.6833          101       151     2012      02        06        037              0.253000       1.662872       0.000000       0.237657   -9999.000000   -9999.000000       0.040000   -9999.000000
57022     57022     shaanxi        107.7833       34.6833          101       151     2012      02        07        038              0.237375      -0.546844       0.000000       0.213645   -9999.000000   -9999.000000       0.043100       0.148000
57022     57022     shaanxi        107.7833       34.6833          101       151     2012      02        08        039              0.230917      -2.328644       0.000000       0.181482       0.089000   -9999.000000       0.038400   -9999.000000
57022     57022     shaanxi        107.7833       34.6833          101       151     2012      02        09        040              0.226125      -2.549438       0.000000       0.179598   -9999.000000   -9999.000000       0.041000       0.099000
57022     57022     shaanxi        107.7833       34.6833          101       151     2012      02        10        041              0.225083      -3.133545       0.000000       0.165624   -9999.000000   -9999.000000   -9999.000000   -9999.000000
57022     57022     shaanxi        107.7833       34.6833          101       151     2012      02        11        042              0.220542      -2.132996       0.000000       0.188860       0.096000   -9999.000000   -9999.000000   -9999.000000
57022     57022     shaanxi        107.7833       34.6833          101       151     2012      02        12        043              0.228875      -0.580902       0.000000       0.200971   -9999.000000   -9999.000000   -9999.000000       0.324000
57022     57022     shaanxi        107.7833       34.6833          101       151     2012      02        13        044              0.234167      -0.227783       0.000000       0.209734       0.096000   -9999.000000       0.033400   -9999.000000
57022     57022     shaanxi        107.7833       34.6833          101       151     2012      02        14        045              0.242167       0.037872       0.000000       0.213834   -9999.000000   -9999.000000   -9999.000000       0.337000
57022     57022     shaanxi        107.7833       34.6833          101       151     2012      02        15        046              0.254708       1.779694       3.577002       0.237773   -9999.000000   -9999.000000       0.041800   -9999.000000
57022     57022     shaanxi        107.7833       34.6833          101       151     2012      02        16        047              0.261375       0.438141       0.000000       0.228249       0.090000   -9999.000000   -9999.000000       0.159000
57022     57022     shaanxi        107.7833       34.6833          101       151     2012      02        17        048              0.256667       0.608337       0.000000       0.219765       0.088000   -9999.000000       0.039600       0.171000
57022     57022     shaanxi        107.7833       34.6833          101       151     2012      02        18        049              0.254125      -0.937958       0.000000       0.199834       0.096000   -9999.000000       0.038100   -9999.000000
57022     57022     shaanxi        107.7833       34.6833          101       151     2012      02        19        050              0.252583      -0.125854       0.000000       0.209040       0.094000   -9999.000000       0.042200       0.372000
57022     57022     shaanxi        107.7833       34.6833          101       151     2012      02        20        051              0.250625       1.207520       0.000000       0.226735   -9999.000000   -9999.000000       0.050800   -9999.000000
57022     57022     shaanxi        107.7833       34.6833          101       151     2012      02        21        052              0.245417       1.606171       0.000000       0.233682   -9999.000000   -9999.000000   -9999.000000       0.287000
57022     57022     shaanxi        107.7833       34.6833          101       151     2012      02        22        053              0.242500       3.242065       0.000000       0.249219       0.079000   -9999.000000   -9999.000000       0.514000
57022     57022     shaanxi        107.7833       34.6833          101       151     2012      02        23        054              0.239500       2.948822       0.000000       0.258675       0.082000   -9999.000000       0.046000       0.440000
57022     57022     shaanxi        107.7833       34.6833          101       151     2012      02        24        055              0.237833       1.240967       0.654930       0.246230       0.080000   -9999.000000       0.049200       0.292000
57022     57022     shaanxi        107.7833       34.6833          101       151     2012      02        25        056              0.235667       1.421417       0.000000       0.240703   -9999.000000   -9999.000000       0.045500   -9999.000000
57022     57022     shaanxi        107.7833       34.6833          101       151     2012      02        26        057              0.236833      -0.816498       0.286658       0.200664   -9999.000000   -9999.000000       0.051700       0.237000
57022     57022     shaanxi        107.7833       34.6833          101       151     2012      02        27        058              0.234917       0.846039       0.000000       0.223669       0.083000   -9999.000000   -9999.000000       0.257000
57022     57022     shaanxi        107.7833       34.6833          101       151     2012      02        28        059              0.233250       0.706726       0.000000       0.222466       0.077000   -9999.000000   -9999.000000       0.447000
57022     57022     shaanxi        107.7833       34.6833          101       151     2012      02        29        060              0.000000   -9999.000000       0.000000   -9999.000000       0.079000   -9999.000000   -9999.000000   -9999.000000
57022     57022     shaanxi        107.7833       34.6833          101       151     2012      03        01        061              0.240458       0.544159       0.896542       0.225331   -9999.000000   -9999.000000       0.048500   -9999.000000
57022     57022     shaanxi        107.7833       34.6833          101       151     2012      03        02        062              0.240667       1.650085       0.000000       0.256184       0.090000   -9999.000000       0.043000       0.418000
57022     57022     shaanxi        107.7833       34.6833          101       151     2012      03        03        063              0.240417       0.863220       0.000000       0.248788   -9999.000000   -9999.000000       0.044400   -9999.000000
57022     57022     shaanxi        107.7833       34.6833          101       151     2012      03        04        064              0.239667       0.600800       0.117229       0.235325   -9999.000000   -9999.000000   -9999.000000       0.273000
57022     57022     shaanxi        107.7833       34.6833          101       151     2012      03        05        065              0.237917       0.216522       0.149644       0.217087       0.095000   -9999.000000       0.050300       0.445000
57022     57022     shaanxi        107.7833       34.6833          101       151     2012      03        06        066              0.234958       1.655914       0.099447       0.248787       0.086000   -9999.000000       0.045900   -9999.000000
57022     57022     shaanxi        107.7833       34.6833          101       151     2012      03        07        067              0.000000       1.537384       0.108757       0.246539       0.089000   -9999.000000       0.052500       0.387000
57022     57022     shaanxi        107.7833       34.6833          101       151     2012      03        08        068              0.236917       2.110321       0.313412       0.253476   -9999.000000   -9999.000000       0.056200   -9999.000000
57022     57022     shaanxi        107.7833       34.6833          101       151     2012      03        09        069              0.248208       1.696411       1.138322       0.258961       0.092000   -9999.000000       0.062600       0.392000
57022     57022     shaanxi        107.7833       34.6833          101       151     2012      03        10        070              0.244542       2.455902       1.013487       0.265590       0.098000   -9999.000000   -9999.000000   -9999.000000
57022     57022     shaanxi        107.7833       34.6833          101       151     2012      03        11        071              0.237708       5.425140       0.000000       0.288501       0.085000   -9999.000000       0.053700   -9999.000000
57022     57022     shaanxi        107.7833       34.6833          101       151     2012      03        12        072              0.233000       6.079102       0.000000       0.290782   -9999.000000   -9999.000000       0.045200       0.699000
57022     57022     shaanxi        107.7833       34.6833          101       151     2012      03        13        073              0.226333       5.829712       0.000000       0.288605       0.084000   -9999.000000       0.044600   -9999.000000
57022     57022     shaanxi        107.7833       34.6833          101       151     2012      03        14        074              0.221250       9.068054       0.416545       0.287783       0.088000       0.106100   -9999.000000       0.621000
57022     57022     shaanxi        107.7833       34.6833          101       151     2012      03        15        075              0.223000       8.880035       0.000000       0.287488       0.088000   -9999.000000   -9999.000000   -9999.000000
57022     57022     shaanxi        107.7833       34.6833          101       151     2012      03        16        076              0.220500       5.172791       0.000000       0.290433       0.080000   -9999.000000       0.047500       0.620000
57022     57022     shaanxi        107.7833       34.6833          101       151     2012      03        17        077              0.211625       9.153564       0.000000       0.286300       0.086000   -9999.000000       0.041300       0.739000
57022     57022     shaanxi        107.7833       34.6833          101       151     2012      03        18        078              0.204917      11.922913       0.816414       0.282167       0.081000   -9999.000000       0.047800   -9999.000000
57022     57022     shaanxi        107.7833       34.6833          101       151     2012      03        19        079              0.202583      12.443115       0.000000       0.281678       0.081500   -9999.000000       0.058600       0.567000
57022     57022     shaanxi        107.7833       34.6833          101       151     2012      03        20        080              0.201625       7.004333       0.000000       0.285446       0.085000   -9999.000000       0.063400   -9999.000000
57022     57022     shaanxi        107.7833       34.6833          101       151     2012      03        21        081              0.202375       6.977264       0.195240       0.285369       0.113000   -9999.000000   -9999.000000       0.451000
57022     57022     shaanxi        107.7833       34.6833          101       151     2012      03        22        082              0.210792       4.318542       2.282276       0.288782   -9999.000000       0.190800       0.055200       0.581000
57022     57022     shaanxi        107.7833       34.6833          101       151     2012      03        23        083              0.205500       4.065796       0.080243       0.296582   -9999.000000   -9999.000000       0.048500       0.537000
57022     57022     shaanxi        107.7833       34.6833          101       151     2012      03        24        084              0.196333       7.140015       0.000000       0.282937       0.088000   -9999.000000       0.050500       0.529000
57022     57022     shaanxi        107.7833       34.6833          101       151     2012      03        25        085              0.000000      10.377960       0.000000       0.281520       0.081000   -9999.000000       0.052200   -9999.000000
57022     57022     shaanxi        107.7833       34.6833          101       151     2012      03        26        086              0.182583      11.606689       0.000000       0.276468       0.083000   -9999.000000   -9999.000000       0.577000
57022     57022     shaanxi        107.7833       34.6833          101       151     2012      03        27        087              0.178833      12.935913       0.366908       0.272729       0.082000   -9999.000000   -9999.000000       0.554000
57022     57022     shaanxi        107.7833       34.6833          101       151     2012      03        28        088              0.222125      13.983673       5.496459       0.270706       0.105000   -9999.000000       0.074700       0.781000
57022     57022     shaanxi        107.7833       34.6833          101       151     2012      03        29        089              0.218917       8.750610       0.912094       0.305012       0.092500   -9999.000000       0.076800       0.639000
57022     57022     shaanxi        107.7833       34.6833          101       151     2012      03        30        090              0.199458      12.802582       0.188528       0.289556       0.078000   -9999.000000       0.060900   -9999.000000
57022     57022     shaanxi        107.7833       34.6833          101       151     2012      03        31        091              0.183708       8.794678       0.108267       0.283416       0.079000   -9999.000000       0.064000       0.660000
57022     57022     shaanxi        107.7833       34.6833          101       151     2012      04        01        092              0.176042      13.195038       0.399887       0.276424       0.092000   -9999.000000   -9999.000000   -9999.000000
57022     57022     shaanxi        107.7833       34.6833          101       151     2012      04        02        093              0.171792      13.761871       0.125323       0.274974       0.090000   -9999.000000       0.068100       0.468000
57022     57022     shaanxi        107.7833       34.6833          101       151     2012      04        03        094              0.167708      10.786469       0.000000       0.272975       0.093000   -9999.000000       0.056600       0.530000
57022     57022     shaanxi        107.7833       34.6833          101       151     2012      04        04        095              0.163458      12.927094       0.000000       0.267281       0.078500   -9999.000000       0.064600   -9999.000000
57022     57022     shaanxi        107.7833       34.6833          101       151     2012      04        05        096              0.160292      15.341736       0.000000       0.260706       0.081000   -9999.000000       0.057100       0.526000
57022     57022     shaanxi        107.7833       34.6833          101       151     2012      04        06        097              0.158500      13.780701       0.000000       0.258328       0.083000   -9999.000000       0.059300   -9999.000000
57022     57022     shaanxi        107.7833       34.6833          101       151     2012      04        07        098              0.156833      13.104431       0.000000       0.257182   -9999.000000   -9999.000000   -9999.000000       0.536000
57022     57022     shaanxi        107.7833       34.6833          101       151     2012      04        08        099              0.155458      14.976044       0.000000       0.252842       0.086000   -9999.000000       0.060100   -9999.000000
57022     57022     shaanxi        107.7833       34.6833          101       151     2012      04        09        100              0.154458      16.475769       0.695019       0.250005       0.099500   -9999.000000       0.074200   -9999.000000
57022     57022     shaanxi        107.7833       34.6833          101       151     2012      04        10        101              0.154042      12.878998       0.000000       0.260609       0.084500   -9999.000000       0.070700       0.546000
57022     57022     shaanxi        107.7833       34.6833          101       151     2012      04        11        102              0.154875      17.234283       3.535379       0.253526       0.092000   -9999.000000       0.074200   -9999.000000
57022     57022     shaanxi        107.7833       34.6833          101       151     2012      04        12        103              0.163917      13.317108       3.201327       0.264684   -9999.000000   -9999.000000   -9999.000000       0.540000
57022     57022     shaanxi        107.7833       34.6833          101       151     2012      04        13        104              0.153708       9.584106       0.000000       0.289665       0.101000   -9999.000000   -9999.000000   -9999.000000
57022     57022     shaanxi        107.7833       34.6833          101       151     2012      04        14        105              0.151417      13.892944       0.000000       0.271472       0.091000   -9999.000000       0.068200       0.360000
57022     57022     shaanxi        107.7833       34.6833          101       151     2012      04        15        106              0.150333      15.309631       0.000000       0.264499       0.084000   -9999.000000       0.077200       0.550000
57022     57022     shaanxi        107.7833       34.6833          101       151     2012      04        16        107              0.149542      17.639038       0.099186       0.255937       0.090000   -9999.000000       0.075100   -9999.000000
57022     57022     shaanxi        107.7833       34.6833          101       151     2012      04        17        108              0.148958      17.298798       0.322825       0.250762       0.094000   -9999.000000       0.086600       0.488000
57022     57022     shaanxi        107.7833       34.6833          101       151     2012      04        18        109              0.148333      13.498016       0.000000       0.255478       0.094000   -9999.000000   -9999.000000   -9999.000000
57022     57022     shaanxi        107.7833       34.6833          101       151     2012      04        19        110              0.147750      17.376984       1.476481       0.248819       0.093000   -9999.000000       0.091300       0.262000
57022     57022     shaanxi        107.7833       34.6833          101       151     2012      04        20        111              0.147625      14.217834       0.000000       0.258769       0.084500   -9999.000000       0.076000       0.522000
57022     57022     shaanxi        107.7833       34.6833          101       151     2012      04        21        112              0.146958      16.572113       0.620272       0.251371       0.096000   -9999.000000       0.082700       0.458000
57022     57022     shaanxi        107.7833       34.6833          101       151     2012      04        22        113              0.146958      18.245117       0.187962       0.240932       0.115000   -9999.000000   -9999.000000       0.474000
57022     57022     shaanxi        107.7833       34.6833          101       151     2012      04        23        114              0.156500      21.006622       1.124634       0.232466       0.177000   -9999.000000       0.071800   -9999.000000
57022     57022     shaanxi        107.7833       34.6833          101       151     2012      04        24        115              0.159375      18.735413       0.530013       0.234734       0.139000       0.056900   -9999.000000       0.675000
57022     57022     shaanxi        107.7833       34.6833          101       151     2012      04        25        116              0.000000      16.526215       0.000000       0.235419       0.117000   -9999.000000       0.082700       0.440000
57022     57022     shaanxi        107.7833       34.6833          101       151     2012      04        26        117              0.145375      16.890076       0.000000       0.223541       0.105000   -9999.000000       0.088100       0.448000
57022     57022     shaanxi        107.7833       34.6833          101       151     2012      04        27        118              0.144208      19.560913       0.000000       0.213664       0.106000   -9999.000000       0.076000       0.458000
57022     57022     shaanxi        107.7833       34.6833          101       151     2012      04        28        119              0.159583      21.503448      11.368384       0.205522   -9999.000000   -9999.000000       0.065400   -9999.000000
57022     57022     shaanxi        107.7833       34.6833          101       151     2012      04        29        120              0.157583      21.720703       0.000000       0.262701       0.119000   -9999.000000   -9999.000000       0.525000
57022     57022     shaanxi        107.7833       34.6833          101       151     2012      04        30        121              0.150083      21.055603       1.376172       0.267586       0.138000   -9999.000000   -9999.000000   -9999.000000
57022     57022     shaanxi        107.7833       34.6833          101       151     2012      05        01        122              0.152625      16.633240       0.295477       0.268142       0.158500   -9999.000000       0.091500       0.590000
57022     57022     shaanxi        107.7833       34.6833          101       151     2012      05        02        123              0.182708      16.910980       3.699321       0.267891   -9999.000000       0.185000       0.109900       0.909000
57022     57022     shaanxi        107.7833       34.6833          101       151     2012      05        03        124              0.198875      16.352264       1.036515       0.283685   -9999.000000   -9999.000000       0.097700   -9999.000000
57022     57022     shaanxi        107.7833       34.6833          101       151     2012      05        04        125              0.172042      16.509583       0.092166       0.284030       0.179000   -9999.000000       0.097100       0.698000
57022     57022     shaanxi        107.7833       34.6833          101       151     2012      05        05        126              0.153292      18.515411       0.220960       0.272935       0.143000   -9999.000000   -9999.000000   -9999.000000
57022     57022     shaanxi        107.7833       34.6833          101       151     2012      05        06        127              0.150250      21.193756       1.065470       0.260989       0.151500   -9999.000000       0.095200       0.677000
57022     57022     shaanxi        107.7833       34.6833          101       151     2012      05        07        128              0.149792      19.087189       0.610126       0.266740   -9999.000000       0.111700       0.077900   -9999.000000
57022     57022     shaanxi        107.7833       34.6833          101       151     2012      05        08        129              0.149542      21.082642       0.777819       0.265560       0.116000   -9999.000000       0.089500   -9999.000000
57022     57022     shaanxi        107.7833       34.6833          101       151     2012      05        09        130              0.149625      22.842041       0.980106       0.259634   -9999.000000   -9999.000000       0.072800       0.624000
57022     57022     shaanxi        107.7833       34.6833          101       151     2012      05        10        131              0.172292      21.440277      16.167055       0.256034   -9999.000000   -9999.000000       0.074800   -9999.000000
57022     57022     shaanxi        107.7833       34.6833          101       151     2012      05        11        132              0.243500      22.176575       0.110363       0.279423       0.206000   -9999.000000   -9999.000000       0.649000
57022     57022     shaanxi        107.7833       34.6833          101       151     2012      05        12        133              0.204625      18.883453       0.000000       0.305273       0.186000       0.037100       0.088200   -9999.000000
57022     57022     shaanxi        107.7833       34.6833          101       151     2012      05        13        134              0.187083      16.659271       0.741082       0.285393       0.188000   -9999.000000       0.090100       0.678000
57022     57022     shaanxi        107.7833       34.6833          101       151     2012      05        14        135              0.168000      14.717072       0.000000       0.283470       0.200000   -9999.000000       0.103800       0.513000
57022     57022     shaanxi        107.7833       34.6833          101       151     2012      05        15        136              0.152750      17.840607       0.000000       0.271748       0.202000   -9999.000000       0.105700   -9999.000000
57022     57022     shaanxi        107.7833       34.6833          101       151     2012      05        16        137              0.145750      19.308960       0.000000       0.260985       0.159500   -9999.000000   -9999.000000       0.472000
57022     57022     shaanxi        107.7833       34.6833          101       151     2012      05        17        138              0.142917      20.075684       0.000000       0.252014       0.155000   -9999.000000   -9999.000000   -9999.000000
57022     57022     shaanxi        107.7833       34.6833          101       151     2012      05        18        139              0.141167      20.800812       0.000000       0.245175       0.148000   -9999.000000       0.095000       0.352000
57022     57022     shaanxi        107.7833       34.6833          101       151     2012      05        19        140              0.139917      22.074677       0.196461       0.238232   -9999.000000   -9999.000000       0.111700       0.477000
57022     57022     shaanxi        107.7833       34.6833          101       151     2012      05        20        141              0.139708      23.777344       3.733400       0.228700   -9999.000000   -9999.000000       0.101200       0.342000
57022     57022     shaanxi        107.7833       34.6833          101       151     2012      05        21        142              0.271750      21.080872       9.523048       0.234134       0.268000   -9999.000000       0.166000       0.904000
57022     57022     shaanxi        107.7833       34.6833          101       151     2012      05        22        143              0.254167      16.565308       0.162599       0.307138       0.225000   -9999.000000   -9999.000000   -9999.000000
57022     57022     shaanxi        107.7833       34.6833          101       151     2012      05        23        144              0.231125      17.367462       0.111305       0.287812   -9999.000000   -9999.000000       0.153000       0.779000
57022     57022     shaanxi        107.7833       34.6833          101       151     2012      05        24        145              0.218042      16.645233       0.114453       0.279410       0.203000   -9999.000000       0.143600       0.511000
57022     57022     shaanxi        107.7833       34.6833          101       151     2012      05        25        146              0.000000      16.367645       1.277297       0.275549       0.244000       0.105800       0.151000       0.495000
57022     57022     shaanxi        107.7833       34.6833          101       151     2012      05        26        147              0.178875      18.599640       0.000000       0.267281       0.196000   -9999.000000       0.135000       0.609000
57022     57022     shaanxi        107.7833       34.6833          101       151     2012      05        27        148              0.160417      21.826202       0.000000       0.256260       0.182000   -9999.000000       0.125800   -9999.000000
57022     57022     shaanxi        107.7833       34.6833          101       151     2012      05        28        149              0.245583      23.311432      25.628719       0.244771   -9999.000000   -9999.000000   -9999.000000       0.968000
57022     57022     shaanxi        107.7833       34.6833          101       151     2012      05        29        150              0.241042      17.026978       0.000000       0.335559       0.180000   -9999.000000       0.149300   -9999.000000
57022     57022     shaanxi        107.7833       34.6833          101       151     2012      05        30        151              0.200708      19.960236       0.000000       0.311361       0.226000   -9999.000000       0.146800   -9999.000000
57022     57022     shaanxi        107.7833       34.6833          101       151     2012      05        31        152              0.182750      21.383850       0.201038       0.294651       0.209000   -9999.000000       0.133300   -9999.000000
57022     57022     shaanxi        107.7833       34.6833          101       151     2012      06        01        153              0.164708      19.534943       0.000000       0.290875       0.167500   -9999.000000       0.132200   -9999.000000
57022     57022     shaanxi        107.7833       34.6833          101       151     2012      06        02        154              0.153042      21.844635       0.000000       0.279960       0.158000   -9999.000000   -9999.000000       0.642000
57022     57022     shaanxi        107.7833       34.6833          101       151     2012      06        03        155              0.148375      22.260193       0.198147       0.271600       0.153000   -9999.000000   -9999.000000   -9999.000000
57022     57022     shaanxi        107.7833       34.6833          101       151     2012      06        04        156              0.145292      21.714691       0.958301       0.266889   -9999.000000   -9999.000000       0.149400       0.509000
57022     57022     shaanxi        107.7833       34.6833          101       151     2012      06        05        157              0.144208      22.405182       2.944462       0.260362       0.198000   -9999.000000       0.188000   -9999.000000
57022     57022     shaanxi        107.7833       34.6833          101       151     2012      06        06        158              0.144542      19.081421       2.178066       0.279086       0.162500   -9999.000000       0.161200   -9999.000000
57022     57022     shaanxi        107.7833       34.6833          101       151     2012      06        07        159              0.142792      21.471252       0.000000       0.280697       0.156000   -9999.000000       0.154000       0.630000
57022     57022     shaanxi        107.7833       34.6833          101       151     2012      06        08        160              0.140583      23.150085       5.249049       0.263484       0.176000   -9999.000000   -9999.000000   -9999.000000
57022     57022     shaanxi        107.7833       34.6833          101       151     2012      06        09        161              0.139542      21.317352       0.000000       0.256711   -9999.000000   -9999.000000       0.161700       0.543000
57022     57022     shaanxi        107.7833       34.6833          101       151     2012      06        10        162              0.137750      24.393677       0.000000       0.244774       0.177000   -9999.000000       0.162000   -9999.000000
57022     57022     shaanxi        107.7833       34.6833          101       151     2012      06        11        163              0.000000      24.201874       0.000000       0.233660       0.168000   -9999.000000       0.180800       0.527000
57022     57022     shaanxi        107.7833       34.6833          101       151     2012      06        12        164              0.134750      23.858643       0.000000       0.223596       0.157000   -9999.000000       0.166800       0.554000
57022     57022     shaanxi        107.7833       34.6833          101       151     2012      06        13        165              0.134375      25.452789       0.000000       0.212028       0.154000   -9999.000000       0.161900   -9999.000000
57022     57022     shaanxi        107.7833       34.6833          101       151     2012      06        14        166              0.132417      26.648468       0.000000       0.201735       0.138000   -9999.000000   -9999.000000       0.497000
57022     57022     shaanxi        107.7833       34.6833          101       151     2012      06        15        167              0.131917      24.230713       0.000000       0.193249       0.187000   -9999.000000       0.167000   -9999.000000
57022     57022     shaanxi        107.7833       34.6833          101       151     2012      06        16        168              0.131875      24.800690       0.148241       0.187746       0.191000   -9999.000000       0.179300       0.428000
57022     57022     shaanxi        107.7833       34.6833          101       151     2012      06        17        169              0.131875      25.994781       0.000000       0.182490       0.160000   -9999.000000       0.164900       0.605000
57022     57022     shaanxi        107.7833       34.6833          101       151     2012      06        18        170              0.132083      25.968750       0.129257       0.178556       0.144000   -9999.000000       0.145000       0.591000
57022     57022     shaanxi        107.7833       34.6833          101       151     2012      06        19        171              0.132042      25.695831       0.000000       0.176327       0.148000   -9999.000000   -9999.000000       0.590000
57022     57022     shaanxi        107.7833       34.6833          101       151     2012      06        20        172              0.132292      26.557098       0.000000       0.172931       0.195000   -9999.000000       0.154500   -9999.000000
57022     57022     shaanxi        107.7833       34.6833          101       151     2012      06        21        173              0.132083      28.052612       1.790610       0.168725       0.221000   -9999.000000       0.142600       0.603000
57022     57022     shaanxi        107.7833       34.6833          101       151     2012      06        22        174              0.131333      28.865234       0.208049       0.176509       0.146500   -9999.000000       0.157600       0.636000
57022     57022     shaanxi        107.7833       34.6833          101       151     2012      06        23        175              0.131208      28.458771       0.043413       0.179687       0.147000   -9999.000000       0.144500       0.629000
57022     57022     shaanxi        107.7833       34.6833          101       151     2012      06        24        176              0.131333      28.797699       1.676280       0.170954       0.151000   -9999.000000       0.144100       0.606000
57022     57022     shaanxi        107.7833       34.6833          101       151     2012      06        25        177              0.132917      25.745544       1.882897       0.183005   -9999.000000   -9999.000000   -9999.000000   -9999.000000
57022     57022     shaanxi        107.7833       34.6833          101       151     2012      06        26        178              0.134375      23.970917       4.786993       0.197808       0.185000   -9999.000000       0.174100       0.736000
57022     57022     shaanxi        107.7833       34.6833          101       151     2012      06        27        179              0.138250      22.914001       1.232454       0.225900       0.198000   -9999.000000       0.168600   -9999.000000
57022     57022     shaanxi        107.7833       34.6833          101       151     2012      06        28        180              0.164458      22.290070      12.601030       0.249650       0.237000   -9999.000000       0.162700       0.893000
57022     57022     shaanxi        107.7833       34.6833          101       151     2012      06        29        181              0.280583      21.765015      12.603080       0.268919       0.210000   -9999.000000       0.187500   -9999.000000
57022     57022     shaanxi        107.7833       34.6833          101       151     2012      06        30        182              0.237000      21.817780       0.000000       0.326761   -9999.000000       0.343300   -9999.000000   -9999.000000
57022     57022     shaanxi        107.7833       34.6833          101       151     2012      07        01        183              0.210833      24.188538      10.519326       0.290451   -9999.000000   -9999.000000   -9999.000000       0.729000
57022     57022     shaanxi        107.7833       34.6833          101       151     2012      07        02        184              0.279417      25.599976       6.804916       0.291027       0.203000   -9999.000000       0.157800   -9999.000000
57022     57022     shaanxi        107.7833       34.6833          101       151     2012      07        03        185              0.285500      22.931519       2.073412       0.326313       0.144000   -9999.000000       0.156600       0.756000
57022     57022     shaanxi        107.7833       34.6833          101       151     2012      07        04        186              0.287792      25.341431       0.038228       0.304309       0.169000   -9999.000000       0.158800   -9999.000000
57022     57022     shaanxi        107.7833       34.6833          101       151     2012      07        05        187              0.251375      24.037781       0.000000       0.293179       0.151000       0.112700       0.153900   -9999.000000
57022     57022     shaanxi        107.7833       34.6833          101       151     2012      07        06        188              0.227792      25.531311       2.457625       0.278285   -9999.000000   -9999.000000   -9999.000000       0.750000
57022     57022     shaanxi        107.7833       34.6833          101       151     2012      07        07        189              0.240000      25.071259       6.152893       0.279821   -9999.000000   -9999.000000       0.154700   -9999.000000
57022     57022     shaanxi        107.7833       34.6833          101       151     2012      07        08        190              0.343292      24.896515      29.820969       0.295900       0.214000       0.361700       0.163200       1.000000
57022     57022     shaanxi        107.7833       34.6833          101       151     2012      07        09        191              0.314792      22.230927       8.337829       0.364930       0.213000   -9999.000000       0.194600   -9999.000000
57022     57022     shaanxi        107.7833       34.6833          101       151     2012      07        10        192              0.285833      21.920593       0.000000       0.351362       0.163000       0.306200       0.180500       0.957000
57022     57022     shaanxi        107.7833       34.6833          101       151     2012      07        11        193              0.258000      26.101990       0.575511       0.326006   -9999.000000   -9999.000000       0.176300       0.833000
57022     57022     shaanxi        107.7833       34.6833          101       151     2012      07        12        194              0.227250      25.611633       0.995863       0.315904       0.182000   -9999.000000   -9999.000000   -9999.000000
57022     57022     shaanxi        107.7833       34.6833          101       151     2012      07        13        195              0.256042      26.576660       1.176743       0.307692       0.186500       0.198200       0.173100       0.694000
57022     57022     shaanxi        107.7833       34.6833          101       151     2012      07        14        196              0.243958      25.919983       0.401966       0.302600       0.185500   -9999.000000       0.179500   -9999.000000
57022     57022     shaanxi        107.7833       34.6833          101       151     2012      07        15        197              0.215292      25.690643       0.000000       0.294334       0.189000   -9999.000000       0.169100       0.634000
57022     57022     shaanxi        107.7833       34.6833          101       151     2012      07        16        198              0.200250      25.513367       8.735366       0.289442   -9999.000000   -9999.000000       0.201900       0.717000
57022     57022     shaanxi        107.7833       34.6833          101       151     2012      07        17        199              0.189250      24.967499       0.000000       0.302245       0.193000   -9999.000000   -9999.000000       0.666000
57022     57022     shaanxi        107.7833       34.6833          101       151     2012      07        18        200              0.179792      23.741730       0.000000       0.309132       0.185500       0.122200   -9999.000000       0.649000
57022     57022     shaanxi        107.7833       34.6833          101       151     2012      07        19        201              0.173125      25.000732       2.085827       0.296261       0.185000   -9999.000000       0.192700   -9999.000000
57022     57022     shaanxi        107.7833       34.6833          101       151     2012      07        20        202              0.170348      24.801666       3.769907       0.297767   -9999.000000   -9999.000000       0.212600       0.758000
57022     57022     shaanxi        107.7833       34.6833          101       151     2012      07        21        203              0.288870      24.420593      30.319073       0.311857       0.234000       0.151900       0.199300       1.000000
57022     57022     shaanxi        107.7833       34.6833          101       151     2012      07        22        204              0.250125      22.234619       0.358848       0.366601       0.227000   -9999.000000       0.218600       0.997000
57022     57022     shaanxi        107.7833       34.6833          101       151     2012      07        23        205              0.230333      24.684967       3.155092       0.334650       0.297000       0.210100   -9999.000000       0.907000
57022     57022     shaanxi        107.7833       34.6833          101       151     2012      07        24        206              0.221917      22.415558       1.343073       0.332402       0.222500   -9999.000000       0.161200   -9999.000000
57022     57022     shaanxi        107.7833       34.6833          101       151     2012      07        25        207              0.202500      23.600311       0.739486       0.328490       0.215000   -9999.000000       0.148100       0.854000
57022     57022     shaanxi        107.7833       34.6833          101       151     2012      07        26        208              0.185333      25.536377       0.463588       0.318765       0.202000       0.252100       0.159100   -9999.000000
57022     57022     shaanxi        107.7833       34.6833          101       151     2012      07        27        209              0.172167      26.494781       1.609487       0.312449   -9999.000000   -9999.000000       0.143200       0.806000
57022     57022     shaanxi        107.7833       34.6833          101       151     2012      07        28        210              0.163500      27.129333       0.262040       0.306257       0.226000   -9999.000000       0.143300       0.684000
57022     57022     shaanxi        107.7833       34.6833          101       151     2012      07        29        211              0.157667      27.805817       0.000000       0.298110       0.181000   -9999.000000   -9999.000000   -9999.000000
57022     57022     shaanxi        107.7833       34.6833          101       151     2012      07        30        212              0.153792      28.307739       2.378497       0.289977       0.209500   -9999.000000       0.123300       0.856000
57022     57022     shaanxi        107.7833       34.6833          101       151     2012      07        31        213              0.151792      24.942810       0.359431       0.296193       0.212000       0.191000       0.122500   -9999.000000
57022     57022     shaanxi        107.7833       34.6833          101       151     2012      08        01        214              0.153833      23.217590       2.544251       0.294307       0.173000   -9999.000000       0.110500       0.883000
57022     57022     shaanxi        107.7833       34.6833          101       151     2012      08        02        215              0.163625      22.822906       0.592030       0.299018       0.220000   -9999.000000       0.117600   -9999.000000
57022     57022     shaanxi        107.7833       34.6833          101       151     2012      08        03        216              0.174250      25.104309       1.272100       0.296665       0.220000   -9999.000000   -9999.000000   -9999.000000
57022     57022     shaanxi        107.7833       34.6833          101       151     2012      08        04        217              0.157125      25.902405       0.514383       0.290791       0.179000       0.081000   -9999.000000       0.700000
57022     57022     shaanxi        107.7833       34.6833          101       151     2012      08        05        218              0.158917      25.516937       5.884195       0.290668       0.207500       0.127600       0.117800   -9999.000000
57022     57022     shaanxi        107.7833       34.6833          101       151     2012      08        06        219              0.157958      24.913879       0.069078       0.300839       0.214000   -9999.000000       0.129200       0.822000
57022     57022     shaanxi        107.7833       34.6833          101       151     2012      08        07        220              0.152792      24.944916       1.873339       0.301764   -9999.000000   -9999.000000       0.114200   -9999.000000
57022     57022     shaanxi        107.7833       34.6833          101       151     2012      08        08        221              0.149667      25.972900       5.985830       0.298852       0.222000       0.132000       0.124200       0.683000
57022     57022     shaanxi        107.7833       34.6833          101       151     2012      08        09        222              0.148542      25.880524       4.454386       0.310204       0.229000   -9999.000000   -9999.000000       0.877000
57022     57022     shaanxi        107.7833       34.6833          101       151     2012      08        10        223              0.147625      26.022949       0.000000       0.312672       0.197000       0.138200       0.122900   -9999.000000
57022     57022     shaanxi        107.7833       34.6833          101       151     2012      08        11        224              0.146667      24.665741       0.528952       0.300740       0.193000   -9999.000000       0.124600       0.823000
57022     57022     shaanxi        107.7833       34.6833          101       151     2012      08        12        225              0.161208      25.974121       6.166011       0.294859       0.176000   -9999.000000       0.126200   -9999.000000
57022     57022     shaanxi        107.7833       34.6833          101       151     2012      08        13        226              0.287292      26.041534      17.045635       0.298121   -9999.000000       0.122000       0.160300       0.977000
57022     57022     shaanxi        107.7833       34.6833          101       151     2012      08        14        227              0.287625      23.037872       7.886447       0.338381       0.264500   -9999.000000       0.149500       0.956000
57022     57022     shaanxi        107.7833       34.6833          101       151     2012      08        15        228              0.237917      22.712891       0.000000       0.349217       0.249500   -9999.000000   -9999.000000       0.913000
57022     57022     shaanxi        107.7833       34.6833          101       151     2012      08        16        229              0.209417      24.688263       0.131893       0.324927       0.250000   -9999.000000       0.142700       0.848000
57022     57022     shaanxi        107.7833       34.6833          101       151     2012      08        17        230              0.272708      24.284302      38.651356       0.317309       0.298000   -9999.000000       0.163300   -9999.000000
57022     57022     shaanxi        107.7833       34.6833          101       151     2012      08        18        231              0.306250      22.212769      11.499804       0.375912   -9999.000000       0.254700       0.151400       1.000000
57022     57022     shaanxi        107.7833       34.6833          101       151     2012      08        19        232              0.328208      19.966095       5.836680       0.367986       0.305000   -9999.000000       0.164700       1.000000
57022     57022     shaanxi        107.7833       34.6833          101       151     2012      08        20        233              0.296792      20.340759       0.493880       0.361254       0.303000       0.276000   -9999.000000       0.936000
57022     57022     shaanxi        107.7833       34.6833          101       151     2012      08        21        234              0.271417      21.493286       0.809795       0.345609       0.225000   -9999.000000       0.126900   -9999.000000
57022     57022     shaanxi        107.7833       34.6833          101       151     2012      08        22        235              0.240875      21.542084       1.826121       0.336215       0.191000       0.089700       0.106400   -9999.000000
57022     57022     shaanxi        107.7833       34.6833          101       151     2012      08        23        236              0.214250      21.630951       0.000000       0.328306   -9999.000000       0.260500       0.120300       0.775000
57022     57022     shaanxi        107.7833       34.6833          101       151     2012      08        24        237              0.195250      21.746277       6.535986       0.323318   -9999.000000   -9999.000000       0.103400   -9999.000000
57022     57022     shaanxi        107.7833       34.6833          101       151     2012      08        25        238              0.000000      22.206421       0.668139       0.318668       0.213500       0.153000       0.106300       0.711000
57022     57022     shaanxi        107.7833       34.6833          101       151     2012      08        26        239              0.176000      23.259613       0.000000       0.315858       0.214000       0.177600   -9999.000000       0.687000
57022     57022     shaanxi        107.7833       34.6833          101       151     2012      08        27        240              0.185292      23.296661       3.391584       0.313448       0.192000   -9999.000000       0.149500   -9999.000000
57022     57022     shaanxi        107.7833       34.6833          101       151     2012      08        28        241              0.190167      22.323120       0.000000       0.319512       0.164000       0.175700       0.140700       0.697000
57022     57022     shaanxi        107.7833       34.6833          101       151     2012      08        29        242              0.170167      23.191071       0.000000       0.311184       0.227000   -9999.000000       0.155700   -9999.000000
57022     57022     shaanxi        107.7833       34.6833          101       151     2012      08        30        243              0.195583      23.449371      23.656981       0.303527   -9999.000000       0.160900       0.144900       0.684000
57022     57022     shaanxi        107.7833       34.6833          101       151     2012      08        31        244              0.341167      23.434814      35.194817       0.326468       0.293000       0.121500   -9999.000000   -9999.000000
57022     57022     shaanxi        107.7833       34.6833          101       151     2012      09        01        245              0.331458      19.979828      11.357673       0.381510       0.224000   -9999.000000   -9999.000000   -9999.000000
57022     57022     shaanxi        107.7833       34.6833          101       151     2012      09        02        246              0.296667      17.174408       1.020885       0.376006       0.204000   -9999.000000       0.162800       0.834000
57022     57022     shaanxi        107.7833       34.6833          101       151     2012      09        03        247              0.270667      19.362244       0.000000       0.352352   -9999.000000   -9999.000000       0.142900   -9999.000000
57022     57022     shaanxi        107.7833       34.6833          101       151     2012      09        04        248              0.230625      20.354706       0.242545       0.341581       0.231000       0.131200       0.131800       0.805000
57022     57022     shaanxi        107.7833       34.6833          101       151     2012      09        05        249              0.212458      20.989075       0.000000       0.334321       0.185500       0.314700       0.130100   -9999.000000
57022     57022     shaanxi        107.7833       34.6833          101       151     2012      09        06        250              0.205875      22.043884       0.890100       0.329329       0.173500   -9999.000000   -9999.000000       0.793000
57022     57022     shaanxi        107.7833       34.6833          101       151     2012      09        07        251              0.275708      22.494965      29.567123       0.324760       0.221000       0.293100       0.164700       1.000000
57022     57022     shaanxi        107.7833       34.6833          101       151     2012      09        08        252              0.315333      20.117401       1.020599       0.365239       0.251000   -9999.000000       0.152500   -9999.000000
57022     57022     shaanxi        107.7833       34.6833          101       151     2012      09        09        253              0.302125      20.103210       7.258690       0.354828       0.239000       0.181200       0.136100       0.892000
57022     57022     shaanxi        107.7833       34.6833          101       151     2012      09        10        254              0.332583      19.754761      22.687046       0.350711       0.285000       0.276900       0.146800   -9999.000000
57022     57022     shaanxi        107.7833       34.6833          101       151     2012      09        11        255              0.294917      18.209412       0.064025       0.378745       0.237000   -9999.000000       0.148400       0.977000
57022     57022     shaanxi        107.7833       34.6833          101       151     2012      09        12        256              0.277167      19.145813       0.000000       0.352285       0.228500   -9999.000000   -9999.000000       0.794000
57022     57022     shaanxi        107.7833       34.6833          101       151     2012      09        13        257              0.259917      15.895172       0.000000       0.343261       0.178000   -9999.000000       0.128800       0.816000
57022     57022     shaanxi        107.7833       34.6833          101       151     2012      09        14        258              0.241792      16.325928       0.000000       0.336434       0.221000       0.174300       0.137100       0.686000
57022     57022     shaanxi        107.7833       34.6833          101       151     2012      09        15        259              0.264625      17.364166       6.574668       0.331160       0.267000       0.049300       0.134700   -9999.000000
57022     57022     shaanxi        107.7833       34.6833          101       151     2012      09        16        260              0.298000      15.914490       3.508186       0.343732       0.244000   -9999.000000       0.138400       0.917000
57022     57022     shaanxi        107.7833       34.6833          101       151     2012      09        17        261              0.282125      14.849548       0.000000       0.345105       0.214000   -9999.000000   -9999.000000       0.796000
57022     57022     shaanxi        107.7833       34.6833          101       151     2012      09        18        262              0.260958      17.127899       1.496583       0.335539       0.191000       0.091500   -9999.000000       0.875000
57022     57022     shaanxi        107.7833       34.6833          101       151     2012      09        19        263              0.242542      18.101929       0.299626       0.329310   -9999.000000   -9999.000000       0.127800       0.773000
57022     57022     shaanxi        107.7833       34.6833          101       151     2012      09        20        264              0.238958      18.946106       4.614320       0.324437       0.241000       0.154400       0.150800   -9999.000000
57022     57022     shaanxi        107.7833       34.6833          101       151     2012      09        21        265              0.219333      16.461243       0.000000       0.334993   -9999.000000   -9999.000000       0.125400       0.832000
57022     57022     shaanxi        107.7833       34.6833          101       151     2012      09        22        266              0.205708      18.673004       0.000000       0.327375       0.166500       0.186900       0.130700   -9999.000000
57022     57022     shaanxi        107.7833       34.6833          101       151     2012      09        23        267              0.201208      18.324554       0.000000       0.323512       0.173000       0.098400   -9999.000000       0.754000
57022     57022     shaanxi        107.7833       34.6833          101       151     2012      09        24        268              0.203417      18.789185      15.086746       0.321301       0.178000   -9999.000000       0.145900       0.869000
57022     57022     shaanxi        107.7833       34.6833          101       151     2012      09        25        269              0.296083      17.968414       8.242165       0.340909       0.225000       0.225600       0.123300   -9999.000000
57022     57022     shaanxi        107.7833       34.6833          101       151     2012      09        26        270              0.270083      15.403442       0.000000       0.359488       0.204000   -9999.000000       0.142100       0.834000
57022     57022     shaanxi        107.7833       34.6833          101       151     2012      09        27        271              0.252786      17.502777       0.000000       0.340440       0.177000   -9999.000000       0.123500   -9999.000000
57022     57022     shaanxi        107.7833       34.6833          101       151     2012      09        28        272              0.221933      16.598724       0.038258       0.332014       0.166500   -9999.000000       0.121200       0.714000
57022     57022     shaanxi        107.7833       34.6833          101       151     2012      09        29        273              0.205250      14.720245       0.022345       0.326840       0.159000   -9999.000000   -9999.000000   -9999.000000
57022     57022     shaanxi        107.7833       34.6833          101       151     2012      09        30        274              0.197583      15.834961       0.000000       0.323323   -9999.000000   -9999.000000       0.120800   -9999.000000
57022     57022     shaanxi        107.7833       34.6833          101       151     2012      10        01        275              0.192833      16.504364       0.000000       0.320146       0.192000   -9999.000000       0.116000       0.735000
57022     57022     shaanxi        107.7833       34.6833          101       151     2012      10        02        276              0.243125      17.000671      15.458720       0.317527       0.219000   -9999.000000       0.104400   -9999.000000
57022     57022     shaanxi        107.7833       34.6833          101       151     2012      10        03        277              0.247458      14.772797       1.363976       0.348342       0.170500       0.114100       0.113300       0.808000
57022     57022     shaanxi        107.7833       34.6833          101       151     2012      10        04        278              0.239958      16.777618       0.657123       0.336819       0.196000   -9999.000000   -9999.000000   -9999.000000
57022     57022     shaanxi        107.7833       34.6833          101       151     2012      10        05        279              0.230000      14.736389       0.000000       0.332520       0.174000   -9999.000000   -9999.000000       0.863000
57022     57022     shaanxi        107.7833       34.6833          101       151     2012      10        06        280              0.222333      15.614288       0.000000       0.327018       0.196000       0.060100       0.107700       0.843000
57022     57022     shaanxi        107.7833       34.6833          101       151     2012      10        07        281              0.220750      14.002991       0.000000       0.325146       0.171000   -9999.000000       0.112100   -9999.000000
57022     57022     shaanxi        107.7833       34.6833          101       151     2012      10        08        282              0.250042      14.229187       1.126978       0.323568       0.198000   -9999.000000       0.101200       0.816000
57022     57022     shaanxi        107.7833       34.6833          101       151     2012      10        09        283              0.240375      13.286255       0.000000       0.325760       0.169500   -9999.000000       0.099300   -9999.000000
57022     57022     shaanxi        107.7833       34.6833          101       151     2012      10        10        284              0.220708      14.425110       0.000000       0.320115       0.166000   -9999.000000   -9999.000000       0.692000
57022     57022     shaanxi        107.7833       34.6833          101       151     2012      10        11        285              0.214083      15.019958       0.000000       0.317139       0.134000       0.129100       0.097800       0.792000
57022     57022     shaanxi        107.7833       34.6833          101       151     2012      10        12        286              0.209417      14.913849       0.000000       0.316217       0.135000   -9999.000000       0.089000       0.748000
57022     57022     shaanxi        107.7833       34.6833          101       151     2012      10        13        287              0.200708      14.703156       0.000000       0.315605       0.118000   -9999.000000       0.101400       0.738000
57022     57022     shaanxi        107.7833       34.6833          101       151     2012      10        14        288              0.193167      15.689392       0.100069       0.312297       0.124000   -9999.000000       0.100100   -9999.000000
57022     57022     shaanxi        107.7833       34.6833          101       151     2012      10        15        289              0.189125      14.383087       3.428655       0.312093       0.142000       0.171600       0.106000       0.726000
57022     57022     shaanxi        107.7833       34.6833          101       151     2012      10        16        290              0.184583      12.534760       0.000000       0.317972   -9999.000000       0.175300   -9999.000000       0.748000
57022     57022     shaanxi        107.7833       34.6833          101       151     2012      10        17        291              0.178208      10.940643       0.000000       0.317252       0.143000   -9999.000000       0.105900       0.764000
57022     57022     shaanxi        107.7833       34.6833          101       151     2012      10        18        292              0.178292      11.842896       4.132215       0.311997       0.154000       0.096600       0.117100       0.770000
57022     57022     shaanxi        107.7833       34.6833          101       151     2012      10        19        293              0.177333       9.172302       0.000000       0.325921       0.131500   -9999.000000       0.100200   -9999.000000
57022     57022     shaanxi        107.7833       34.6833          101       151     2012      10        20        294              0.174125      12.409607       0.000000       0.317854       0.140000   -9999.000000       0.104300       0.819000
57022     57022     shaanxi        107.7833       34.6833          101       151     2012      10        21        295              0.171583      14.109924       0.066127       0.314585       0.176000       0.143300   -9999.000000   -9999.000000
57022     57022     shaanxi        107.7833       34.6833          101       151     2012      10        22        296              0.166917       8.580231       0.000000       0.313505   -9999.000000   -9999.000000       0.111000       0.718000
57022     57022     shaanxi        107.7833       34.6833          101       151     2012      10        23        297              0.186875      10.334900       1.863582       0.310642   -9999.000000   -9999.000000       0.102300       0.700000
57022     57022     shaanxi        107.7833       34.6833          101       151     2012      10        24        298              0.179542       7.979462       0.000000       0.317753   -9999.000000       0.029100       0.118000   -9999.000000
57022     57022     shaanxi        107.7833       34.6833          101       151     2012      10        25        299              0.000000      10.443359       0.072659       0.312633       0.159000   -9999.000000       0.107300       0.721000
57022     57022     shaanxi        107.7833       34.6833          101       151     2012      10        26        300              0.155583      11.508606       0.000000       0.310588       0.149000   -9999.000000       0.113700   -9999.000000
57022     57022     shaanxi        107.7833       34.6833          101       151     2012      10        27        301              0.149333      12.667511       0.000000       0.308894   -9999.000000   -9999.000000   -9999.000000       0.720000
57022     57022     shaanxi        107.7833       34.6833          101       151     2012      10        28        302              0.000000      12.318207       0.516716       0.306911       0.162000   -9999.000000       0.108200   -9999.000000
57022     57022     shaanxi        107.7833       34.6833          101       151     2012      10        29        303              0.147417      10.498810       0.000000       0.308697       0.154500   -9999.000000       0.105200   -9999.000000
57022     57022     shaanxi        107.7833       34.6833          101       151     2012      10        30        304              0.143667      10.426239       0.000000       0.308011       0.146000   -9999.000000       0.097200       0.712000
57022     57022     shaanxi        107.7833       34.6833          101       151     2012      10        31        305              0.140583       9.315186       0.000000       0.305397       0.165000   -9999.000000       0.102400   -9999.000000
57022     57022     shaanxi        107.7833       34.6833          101       151     2012      11        01        306              0.138417       9.080200       0.000000       0.303556       0.132000   -9999.000000   -9999.000000       0.713000
57022     57022     shaanxi        107.7833       34.6833          101       151     2012      11        02        307              0.139333       9.829834       0.783630       0.303619   -9999.000000   -9999.000000   -9999.000000   -9999.000000
57022     57022     shaanxi        107.7833       34.6833          101       151     2012      11        03        308              0.137792       9.736603       0.269387       0.303277   -9999.000000       0.224100       0.095600       0.456000
57022     57022     shaanxi        107.7833       34.6833          101       151     2012      11        04        309              0.136417       4.555939       0.128736       0.289525       0.123000   -9999.000000       0.105500       0.588000
57022     57022     shaanxi        107.7833       34.6833          101       151     2012      11        05        310              0.135750       4.106262       0.056861       0.291414       0.126000   -9999.000000       0.083000   -9999.000000
57022     57022     shaanxi        107.7833       34.6833          101       151     2012      11        06        311              0.136958       5.077759       0.346507       0.297259       0.141000   -9999.000000       0.094200       0.656000
57022     57022     shaanxi        107.7833       34.6833          101       151     2012      11        07        312              0.212625       6.593414       0.437333       0.300247   -9999.000000   -9999.000000   -9999.000000   -9999.000000
57022     57022     shaanxi        107.7833       34.6833          101       151     2012      11        08        313              0.197333       4.314606       0.062134       0.304122       0.140000       0.164300       0.105600       0.681000
57022     57022     shaanxi        107.7833       34.6833          101       151     2012      11        09        314              0.188917       6.469696       0.266457       0.302864       0.155000   -9999.000000       0.084900       0.792000
57022     57022     shaanxi        107.7833       34.6833          101       151     2012      11        10        315              0.184875       4.788391       1.056895       0.304330       0.132000   -9999.000000       0.095500       0.700000
57022     57022     shaanxi        107.7833       34.6833          101       151     2012      11        11        316              0.174625       3.302094       0.432242       0.286070       0.129000   -9999.000000       0.089300       0.568000
57022     57022     shaanxi        107.7833       34.6833          101       151     2012      11        12        317              0.163292       4.367676       0.000000       0.295379   -9999.000000   -9999.000000       0.082000   -9999.000000
57022     57022     shaanxi        107.7833       34.6833          101       151     2012      11        13        318              0.000000       6.050720       0.000000       0.300419   -9999.000000       0.119700   -9999.000000       0.609000
57022     57022     shaanxi        107.7833       34.6833          101       151     2012      11        14        319              0.151250       6.748718       0.000000       0.299848       0.123500   -9999.000000       0.081100       0.672000
57022     57022     shaanxi        107.7833       34.6833          101       151     2012      11        15        320              0.152292       4.988403       0.610795       0.300410   -9999.000000       0.164100       0.084400       0.601000
57022     57022     shaanxi        107.7833       34.6833          101       151     2012      11        16        321              0.151083       3.051208       0.295087       0.300567       0.129000       0.032700       0.076400       0.604000
57022     57022     shaanxi        107.7833       34.6833          101       151     2012      11        17        322              0.000000       5.420166       0.000000       0.300959       0.133000   -9999.000000       0.084700   -9999.000000
57022     57022     shaanxi        107.7833       34.6833          101       151     2012      11        18        323              0.145250       7.079102       0.000000       0.300498   -9999.000000       0.208600   -9999.000000       0.603000
57022     57022     shaanxi        107.7833       34.6833          101       151     2012      11        19        324              0.144083       6.020935       0.000000       0.299243       0.127000   -9999.000000   -9999.000000   -9999.000000
57022     57022     shaanxi        107.7833       34.6833          101       151     2012      11        20        325              0.143917       4.833618       0.000000       0.299831       0.120000   -9999.000000       0.069100       0.577000
57022     57022     shaanxi        107.7833       34.6833          101       151     2012      11        21        326              0.144250       4.639954       0.000000       0.300693       0.108500       0.050700       0.082700       0.559000
57022     57022     shaanxi        107.7833       34.6833          101       151     2012      11        22        327              0.142083       6.183441       0.000000       0.300565       0.111000   -9999.000000       0.070600   -9999.000000
57022     57022     shaanxi        107.7833       34.6833          101       151     2012      11        23        328              0.140083       3.291473       0.000000       0.289517   -9999.000000       0.127600       0.078200       0.402000
57022     57022     shaanxi        107.7833       34.6833          101       151     2012      11        24        329              0.139750       2.876526       0.186601       0.274515   -9999.000000   -9999.000000   -9999.000000   -9999.000000
57022     57022     shaanxi        107.7833       34.6833          101       151     2012      11        25        330              0.148833       1.255768       0.129677       0.273646       0.111000       0.220800       0.072700       0.396000
57022     57022     shaanxi        107.7833       34.6833          101       151     2012      11        26        331              0.147458       1.572693       0.000000       0.254862       0.099000       0.117300   -9999.000000   -9999.000000
57022     57022     shaanxi        107.7833       34.6833          101       151     2012      11        27        332              0.144625       1.560699       0.000000       0.255426       0.120000   -9999.000000       0.076400   -9999.000000
57022     57022     shaanxi        107.7833       34.6833          101       151     2012      11        28        333              0.142417       2.231110       0.000000       0.258717       0.114000   -9999.000000       0.070900       0.360000
57022     57022     shaanxi        107.7833       34.6833          101       151     2012      11        29        334              0.140792       0.415619       0.131496       0.233502   -9999.000000   -9999.000000       0.070600   -9999.000000
57022     57022     shaanxi        107.7833       34.6833          101       151     2012      11        30        335              0.140667      -0.467529       0.087030       0.207335   -9999.000000   -9999.000000   -9999.000000       0.468000
57022     57022     shaanxi        107.7833       34.6833          101       151     2012      12        01        336              0.141333       0.444977       0.298001       0.226581       0.112000       0.066500       0.069200   -9999.000000
57022     57022     shaanxi        107.7833       34.6833          101       151     2012      12        02        337              0.140792       1.300262       0.000000       0.248136       0.121000   -9999.000000       0.076900       0.283000
57022     57022     shaanxi        107.7833       34.6833          101       151     2012      12        03        338              0.139583       2.216400       0.000000       0.258309       0.118000       0.145400       0.063900       0.461000
57022     57022     shaanxi        107.7833       34.6833          101       151     2012      12        04        339              0.139125       1.541687       0.000000       0.249563   -9999.000000   -9999.000000       0.071800   -9999.000000
57022     57022     shaanxi        107.7833       34.6833          101       151     2012      12        05        340              0.138167       2.317841       0.000000       0.262116   -9999.000000   -9999.000000   -9999.000000       0.326000
57022     57022     shaanxi        107.7833       34.6833          101       151     2012      12        06        341              0.138208       1.725037       0.000000       0.251072       0.111000       0.115900       0.071800   -9999.000000
57022     57022     shaanxi        107.7833       34.6833          101       151     2012      12        07        342              0.137250       2.645752       0.000000       0.271778       0.109000   -9999.000000       0.057900       0.299000
57022     57022     shaanxi        107.7833       34.6833          101       151     2012      12        08        343              0.136208       2.637024       0.000000       0.261321       0.118000   -9999.000000       0.071500       0.218000
57022     57022     shaanxi        107.7833       34.6833          101       151     2012      12        09        344              0.135542       0.526550       0.000000       0.231517   -9999.000000   -9999.000000       0.064100       0.327000
57022     57022     shaanxi        107.7833       34.6833          101       151     2012      12        10        345              0.135500      -0.148438       0.000000       0.213818   -9999.000000   -9999.000000       0.069700       0.314000
57022     57022     shaanxi        107.7833       34.6833          101       151     2012      12        11        346              0.134583       0.813812       0.000000       0.233233       0.108000   -9999.000000   -9999.000000   -9999.000000
57022     57022     shaanxi        107.7833       34.6833          101       151     2012      12        12        347              0.134833       0.012848       0.000000       0.219914       0.107000   -9999.000000       0.069600       0.207000
57022     57022     shaanxi        107.7833       34.6833          101       151     2012      12        13        348              0.135000      -0.307190       0.000000       0.204268   -9999.000000   -9999.000000       0.063600       0.241000
57022     57022     shaanxi        107.7833       34.6833          101       151     2012      12        14        349              0.136042      -1.284210       0.000000       0.180267       0.110000       0.074600       0.075700       0.280000
57022     57022     shaanxi        107.7833       34.6833          101       151     2012      12        15        350              0.000000      -0.231079       0.000000       0.210267   -9999.000000   -9999.000000       0.071700       0.189000
57022     57022     shaanxi        107.7833       34.6833          101       151     2012      12        16        351              0.136250      -0.885345       0.000000       0.185485   -9999.000000   -9999.000000   -9999.000000   -9999.000000
57022     57022     shaanxi        107.7833       34.6833          101       151     2012      12        17        352              0.136167      -0.739868       0.000000       0.189778       0.104000   -9999.000000   -9999.000000       0.198000
57022     57022     shaanxi        107.7833       34.6833          101       151     2012      12        18        353              0.135375      -0.998291       0.000000       0.199664       0.100000   -9999.000000       0.061400   -9999.000000
57022     57022     shaanxi        107.7833       34.6833          101       151     2012      12        19        354              0.135625      -0.885468       0.000000       0.201869       0.120000       0.106600       0.071400       0.220000
57022     57022     shaanxi        107.7833       34.6833          101       151     2012      12        20        355              0.000000      -0.830505       1.178062       0.190763   -9999.000000   -9999.000000       0.058100       0.049000
57022     57022     shaanxi        107.7833       34.6833          101       151     2012      12        21        356              0.139917      -2.292725       0.179328       0.169399   -9999.000000       0.072700       0.061600   -9999.000000
57022     57022     shaanxi        107.7833       34.6833          101       151     2012      12        22        357              0.136583      -2.484833       0.000000       0.172862   -9999.000000   -9999.000000   -9999.000000       0.096000
57022     57022     shaanxi        107.7833       34.6833          101       151     2012      12        23        358              0.128375      -5.213104       0.000000       0.152043       0.092000   -9999.000000       0.066500   -9999.000000
57022     57022     shaanxi        107.7833       34.6833          101       151     2012      12        24        359              0.126556      -4.420227       0.000000       0.155521       0.099000   -9999.000000       0.052500       0.098000
57022     57022     shaanxi        107.7833       34.6833          101       151     2012      12        25        360              0.128625      -3.009430       0.000000       0.171870   -9999.000000   -9999.000000       0.069700   -9999.000000
57022     57022     shaanxi        107.7833       34.6833          101       151     2012      12        26        361              0.000000      -3.211853       0.000000       0.164458   -9999.000000   -9999.000000       0.061700   -9999.000000
57022     57022     shaanxi        107.7833       34.6833          101       151     2012      12        27        362              0.126364      -4.272644       0.000000       0.156399   -9999.000000   -9999.000000       0.065500       0.100000
57022     57022     shaanxi        107.7833       34.6833          101       151     2012      12        28        363              0.000000      -3.408020       0.100454       0.165689   -9999.000000   -9999.000000   -9999.000000   -9999.000000
57022     57022     shaanxi        107.7833       34.6833          101       151     2012      12        29        364              0.000000      -4.052704       0.000000       0.155994   -9999.000000   -9999.000000       0.057700       0.028000
57022     57022     shaanxi        107.7833       34.6833          101       151     2012      12        30        365              0.000000      -7.379730       0.000000       0.142487       0.092000   -9999.000000       0.067800   -9999.000000
57022     57022     shaanxi        107.7833       34.6833          101       151     2012      12        31        366              0.127667      -4.278320       0.000000       0.161109   -9999.000000       0.036700       0.050600       0.058000
