# Supplementary material for: Research on Fusing Multisatellite Soil Moisture Data Based on Bayesian Model Averaging
Source: Hindawi journal article supplement (doi:10.1155/2018/9310838), 2018-06-25
Supplement: f1 [file 9310838.f1.zip › 2012_sm00-10cm_daily_ZDB_ZHY_57024_366days_allin.txt]

57024     57024     shaanxi        107.6500       34.4500          102       151     2012      01        01        001              0.000000   -9999.000000       0.000000   -9999.000000       0.092000   -9999.000000       0.037500   -9999.000000
57024     57024     shaanxi        107.6500       34.4500          102       151     2012      01        02        002              0.099042      -1.467896       0.000000       0.190291       0.102000   -9999.000000   -9999.000000       0.132000
57024     57024     shaanxi        107.6500       34.4500          102       151     2012      01        03        003              0.000000      -0.503418       0.000000       0.211419   -9999.000000   -9999.000000       0.039800   -9999.000000
57024     57024     shaanxi        107.6500       34.4500          102       151     2012      01        04        004              0.083957      -3.283966       0.000000       0.181690   -9999.000000   -9999.000000       0.041000       0.019000
57024     57024     shaanxi        107.6500       34.4500          102       151     2012      01        05        005              0.077167      -4.420319       0.000000       0.162247   -9999.000000   -9999.000000       0.036600   -9999.000000
57024     57024     shaanxi        107.6500       34.4500          102       151     2012      01        06        006              0.083208      -4.203735       0.000000       0.158811   -9999.000000   -9999.000000       0.045100       0.139000
57024     57024     shaanxi        107.6500       34.4500          102       151     2012      01        07        007              0.088250      -2.918243       0.000000       0.168091   -9999.000000   -9999.000000   -9999.000000       0.043000
57024     57024     shaanxi        107.6500       34.4500          102       151     2012      01        08        008              0.000000      -3.364532       0.000000       0.162763   -9999.000000   -9999.000000   -9999.000000   -9999.000000
57024     57024     shaanxi        107.6500       34.4500          102       151     2012      01        09        009              0.096958      -1.298950       0.000000       0.198422   -9999.000000   -9999.000000   -9999.000000       0.053000
57024     57024     shaanxi        107.6500       34.4500          102       151     2012      01        10        010              0.093875      -0.803986       0.000000       0.206845       0.090000   -9999.000000       0.034500   -9999.000000
57024     57024     shaanxi        107.6500       34.4500          102       151     2012      01        11        011              0.086458      -1.655792       0.000000       0.195214       0.097000   -9999.000000       0.026700       0.069000
57024     57024     shaanxi        107.6500       34.4500          102       151     2012      01        12        012              0.092583      -1.961029       0.000000       0.188679       0.106000   -9999.000000       0.033400   -9999.000000
57024     57024     shaanxi        107.6500       34.4500          102       151     2012      01        13        013              0.093333      -1.940552       0.000000       0.183191   -9999.000000   -9999.000000   -9999.000000   -9999.000000
57024     57024     shaanxi        107.6500       34.4500          102       151     2012      01        14        014              0.090708      -1.665619       0.000000       0.186565   -9999.000000   -9999.000000       0.036800       0.080000
57024     57024     shaanxi        107.6500       34.4500          102       151     2012      01        15        015              0.086708      -1.256622       0.000000       0.204869   -9999.000000   -9999.000000       0.025000   -9999.000000
57024     57024     shaanxi        107.6500       34.4500          102       151     2012      01        16        016              0.087500      -1.804016       0.000000       0.190991       0.094000   -9999.000000       0.031400       0.079000
57024     57024     shaanxi        107.6500       34.4500          102       151     2012      01        17        017              0.000000      -1.456421       0.000000       0.192320       0.096000   -9999.000000       0.027000   -9999.000000
57024     57024     shaanxi        107.6500       34.4500          102       151     2012      01        18        018              0.091875      -0.245300       0.000000       0.218671   -9999.000000   -9999.000000       0.029900       0.114000
57024     57024     shaanxi        107.6500       34.4500          102       151     2012      01        19        019              0.096667      -1.674957       0.000000       0.180866   -9999.000000   -9999.000000   -9999.000000       0.141000
57024     57024     shaanxi        107.6500       34.4500          102       151     2012      01        20        020              0.112500      -2.291473       0.220528       0.170878   -9999.000000   -9999.000000       0.025900   -9999.000000
57024     57024     shaanxi        107.6500       34.4500          102       151     2012      01        21        021              0.125875      -1.881622       0.000000       0.180581   -9999.000000   -9999.000000       0.027300       0.051000
57024     57024     shaanxi        107.6500       34.4500          102       151     2012      01        22        022              0.133667      -3.830963       0.000000       0.161915   -9999.000000   -9999.000000       0.022800   -9999.000000
57024     57024     shaanxi        107.6500       34.4500          102       151     2012      01        23        023              0.135500      -7.105042       0.000000       0.146766   -9999.000000   -9999.000000       0.026700       0.037000
57024     57024     shaanxi        107.6500       34.4500          102       151     2012      01        24        024              0.124458      -7.116547       0.695413       0.142083   -9999.000000   -9999.000000   -9999.000000       0.037000
57024     57024     shaanxi        107.6500       34.4500          102       151     2012      01        25        025              0.103958      -7.453064       0.460634       0.142806   -9999.000000   -9999.000000   -9999.000000       0.169000
57024     57024     shaanxi        107.6500       34.4500          102       151     2012      01        26        026              0.098500      -5.353088       0.089379       0.157114       0.096000   -9999.000000       0.016700       0.049000
57024     57024     shaanxi        107.6500       34.4500          102       151     2012      01        27        027              0.103500      -3.115051       0.158784       0.177186       0.098000   -9999.000000       0.021000   -9999.000000
57024     57024     shaanxi        107.6500       34.4500          102       151     2012      01        28        028              0.143708      -1.651978       0.000000       0.191828       0.104000   -9999.000000       0.020800       0.153000
57024     57024     shaanxi        107.6500       34.4500          102       151     2012      01        29        029              0.158333      -0.095062       0.347003       0.216574   -9999.000000   -9999.000000       0.027800       0.178000
57024     57024     shaanxi        107.6500       34.4500          102       151     2012      01        30        030              0.155625      -0.417389       0.280460       0.215772   -9999.000000   -9999.000000   -9999.000000       0.389000
57024     57024     shaanxi        107.6500       34.4500          102       151     2012      01        31        031              0.155333       0.517426       1.419252       0.227549       0.115000   -9999.000000       0.029000       0.390000
57024     57024     shaanxi        107.6500       34.4500          102       151     2012      02        01        032              0.144542       2.292542       0.477684       0.257649   -9999.000000   -9999.000000       0.028200   -9999.000000
57024     57024     shaanxi        107.6500       34.4500          102       151     2012      02        02        033              0.121292       0.069061       0.108733       0.230338   -9999.000000   -9999.000000       0.032600       0.053000
57024     57024     shaanxi        107.6500       34.4500          102       151     2012      02        03        034              0.125750      -1.964447       0.908224       0.193072       0.104000   -9999.000000       0.039400   -9999.000000
57024     57024     shaanxi        107.6500       34.4500          102       151     2012      02        04        035              0.125333       0.178040       0.104085       0.220426   -9999.000000   -9999.000000       0.039000       0.145000
57024     57024     shaanxi        107.6500       34.4500          102       151     2012      02        05        036              0.127542       0.086914       0.087479       0.218664   -9999.000000   -9999.000000   -9999.000000       0.268000
57024     57024     shaanxi        107.6500       34.4500          102       151     2012      02        06        037              0.114125       1.421783       0.000000       0.240744   -9999.000000   -9999.000000       0.035900   -9999.000000
57024     57024     shaanxi        107.6500       34.4500          102       151     2012      02        07        038              0.096250      -0.579895       0.000000       0.219867   -9999.000000   -9999.000000       0.037900       0.053000
57024     57024     shaanxi        107.6500       34.4500          102       151     2012      02        08        039              0.089083      -2.682892       0.000000       0.181008       0.096000   -9999.000000       0.031300   -9999.000000
57024     57024     shaanxi        107.6500       34.4500          102       151     2012      02        09        040              0.096667      -2.852020       0.000000       0.178376   -9999.000000   -9999.000000       0.032800       0.048000
57024     57024     shaanxi        107.6500       34.4500          102       151     2012      02        10        041              0.097458      -3.388336       0.000000       0.165604   -9999.000000   -9999.000000   -9999.000000   -9999.000000
57024     57024     shaanxi        107.6500       34.4500          102       151     2012      02        11        042              0.096292      -2.215485       0.000000       0.192006       0.097000   -9999.000000   -9999.000000   -9999.000000
57024     57024     shaanxi        107.6500       34.4500          102       151     2012      02        12        043              0.100583      -0.976379       0.000000       0.203648   -9999.000000   -9999.000000   -9999.000000       0.215000
57024     57024     shaanxi        107.6500       34.4500          102       151     2012      02        13        044              0.098417      -0.132141       0.000000       0.218381       0.101000   -9999.000000       0.024900   -9999.000000
57024     57024     shaanxi        107.6500       34.4500          102       151     2012      02        14        045              0.101130      -0.500244       0.000000       0.213632   -9999.000000   -9999.000000   -9999.000000       0.227000
57024     57024     shaanxi        107.6500       34.4500          102       151     2012      02        15        046              0.102042       1.368164       0.131063       0.239716   -9999.000000   -9999.000000       0.040300   -9999.000000
57024     57024     shaanxi        107.6500       34.4500          102       151     2012      02        16        047              0.100583       0.216400       0.000000       0.230468       0.095000   -9999.000000   -9999.000000       0.271000
57024     57024     shaanxi        107.6500       34.4500          102       151     2012      02        17        048              0.097875       0.511658       0.000000       0.225533   -9999.000000   -9999.000000       0.037400       0.062000
57024     57024     shaanxi        107.6500       34.4500          102       151     2012      02        18        049              0.097083      -1.245087       0.000000       0.198828       0.099000   -9999.000000       0.029200   -9999.000000
57024     57024     shaanxi        107.6500       34.4500          102       151     2012      02        19        050              0.098208      -0.415161       0.000000       0.210570       0.100000   -9999.000000       0.040100       0.261000
57024     57024     shaanxi        107.6500       34.4500          102       151     2012      02        20        051              0.098083       1.226929       0.000000       0.234409   -9999.000000   -9999.000000       0.034700   -9999.000000
57024     57024     shaanxi        107.6500       34.4500          102       151     2012      02        21        052              0.104417       1.511353       0.000000       0.240654   -9999.000000   -9999.000000   -9999.000000       0.327000
57024     57024     shaanxi        107.6500       34.4500          102       151     2012      02        22        053              0.107042       2.831024       0.000000       0.254326       0.079000   -9999.000000   -9999.000000       0.316000
57024     57024     shaanxi        107.6500       34.4500          102       151     2012      02        23        054              0.105000       2.863098       0.412560       0.270404       0.088500   -9999.000000       0.031100       0.425000
57024     57024     shaanxi        107.6500       34.4500          102       151     2012      02        24        055              0.105083       1.233307       0.487167       0.254303       0.083000   -9999.000000       0.032800       0.141000
57024     57024     shaanxi        107.6500       34.4500          102       151     2012      02        25        056              0.103875       1.448883       0.000000       0.252309   -9999.000000   -9999.000000       0.032800   -9999.000000
57024     57024     shaanxi        107.6500       34.4500          102       151     2012      02        26        057              0.105000      -0.606598       0.223552       0.209708   -9999.000000   -9999.000000       0.039700       0.177000
57024     57024     shaanxi        107.6500       34.4500          102       151     2012      02        27        058              0.103917       0.123260       0.000000       0.222408       0.079000   -9999.000000   -9999.000000       0.194000
57024     57024     shaanxi        107.6500       34.4500          102       151     2012      02        28        059              0.103792       0.084351       0.000000       0.221052       0.075000   -9999.000000   -9999.000000       0.451000
57024     57024     shaanxi        107.6500       34.4500          102       151     2012      02        29        060              0.000000   -9999.000000       0.000000   -9999.000000       0.088000   -9999.000000   -9999.000000   -9999.000000
57024     57024     shaanxi        107.6500       34.4500          102       151     2012      03        01        061              0.111083       0.304108       0.418206       0.223976   -9999.000000   -9999.000000       0.040300   -9999.000000
57024     57024     shaanxi        107.6500       34.4500          102       151     2012      03        02        062              0.111958       1.227478       0.000000       0.253872   -9999.000000   -9999.000000       0.032700       0.314000
57024     57024     shaanxi        107.6500       34.4500          102       151     2012      03        03        063              0.110083       0.919464       0.000000       0.251495   -9999.000000   -9999.000000       0.035000   -9999.000000
57024     57024     shaanxi        107.6500       34.4500          102       151     2012      03        04        064              0.108000       0.397827       0.031450       0.233693   -9999.000000   -9999.000000   -9999.000000       0.234000
57024     57024     shaanxi        107.6500       34.4500          102       151     2012      03        05        065              0.108417      -0.103729       1.848357       0.212524       0.105000   -9999.000000       0.031300       0.310000
57024     57024     shaanxi        107.6500       34.4500          102       151     2012      03        06        066              0.106417       1.436340       0.579442       0.251334   -9999.000000   -9999.000000       0.034400   -9999.000000
57024     57024     shaanxi        107.6500       34.4500          102       151     2012      03        07        067              0.000000       1.742249       0.000000       0.253881   -9999.000000   -9999.000000       0.041200       0.337000
57024     57024     shaanxi        107.6500       34.4500          102       151     2012      03        08        068              0.128958       1.846527       0.163569       0.257933       0.108000   -9999.000000       0.042500   -9999.000000
57024     57024     shaanxi        107.6500       34.4500          102       151     2012      03        09        069              0.128792       1.322845       0.965834       0.259899       0.098000   -9999.000000       0.037300       0.305000
57024     57024     shaanxi        107.6500       34.4500          102       151     2012      03        10        070              0.124917       1.712830       1.336588       0.262535       0.105000   -9999.000000   -9999.000000   -9999.000000
57024     57024     shaanxi        107.6500       34.4500          102       151     2012      03        11        071              0.118625       5.150879       0.000000       0.292655       0.088000   -9999.000000       0.037600   -9999.000000
57024     57024     shaanxi        107.6500       34.4500          102       151     2012      03        12        072              0.115958       5.239746       0.000000       0.295175   -9999.000000   -9999.000000       0.037100       0.329000
57024     57024     shaanxi        107.6500       34.4500          102       151     2012      03        13        073              0.115917       5.380646       0.000000       0.293575       0.093000   -9999.000000       0.033300   -9999.000000
57024     57024     shaanxi        107.6500       34.4500          102       151     2012      03        14        074              0.113333       7.940948       0.178142       0.298764       0.088000   -9999.000000   -9999.000000       0.504000
57024     57024     shaanxi        107.6500       34.4500          102       151     2012      03        15        075              0.114875       7.755798       0.000000       0.300380       0.089000   -9999.000000   -9999.000000   -9999.000000
57024     57024     shaanxi        107.6500       34.4500          102       151     2012      03        16        076              0.119042       4.142853       0.000000       0.300526       0.085000   -9999.000000       0.041200       0.571000
57024     57024     shaanxi        107.6500       34.4500          102       151     2012      03        17        077              0.118250       8.486298       0.000000       0.299046   -9999.000000   -9999.000000       0.032000       0.372000
57024     57024     shaanxi        107.6500       34.4500          102       151     2012      03        18        078              0.114500      11.182617       0.246386       0.296418       0.087000   -9999.000000       0.042800   -9999.000000
57024     57024     shaanxi        107.6500       34.4500          102       151     2012      03        19        079              0.110875      11.544312       0.000000       0.293596       0.084500   -9999.000000       0.036000       0.446000
57024     57024     shaanxi        107.6500       34.4500          102       151     2012      03        20        080              0.109542       5.755951       0.000000       0.296540       0.088500   -9999.000000       0.039700   -9999.000000
57024     57024     shaanxi        107.6500       34.4500          102       151     2012      03        21        081              0.110292       5.230438       0.129970       0.297885       0.122000   -9999.000000   -9999.000000       0.536000
57024     57024     shaanxi        107.6500       34.4500          102       151     2012      03        22        082              0.110708       3.293304       0.079461       0.299192   -9999.000000   -9999.000000       0.035400       0.381000
57024     57024     shaanxi        107.6500       34.4500          102       151     2012      03        23        083              0.112625       3.717682       0.000000       0.296480   -9999.000000   -9999.000000       0.033600       0.549000
57024     57024     shaanxi        107.6500       34.4500          102       151     2012      03        24        084              0.113667       6.669037       0.000000       0.285196       0.094000   -9999.000000       0.033000       0.580000
57024     57024     shaanxi        107.6500       34.4500          102       151     2012      03        25        085              0.000000       9.752625       0.000000       0.289952       0.096000   -9999.000000       0.037800   -9999.000000
57024     57024     shaanxi        107.6500       34.4500          102       151     2012      03        26        086              0.120458      11.092560       0.516603       0.286760       0.100000   -9999.000000   -9999.000000       0.633000
57024     57024     shaanxi        107.6500       34.4500          102       151     2012      03        27        087              0.135875      12.572540       1.452778       0.284358       0.092000   -9999.000000   -9999.000000       0.560000
57024     57024     shaanxi        107.6500       34.4500          102       151     2012      03        28        088              0.138792      13.073242       2.459221       0.289820       0.110000   -9999.000000       0.056400       0.825000
57024     57024     shaanxi        107.6500       34.4500          102       151     2012      03        29        089              0.146417       8.320068       4.760862       0.304168       0.103500   -9999.000000       0.061600       0.464000
57024     57024     shaanxi        107.6500       34.4500          102       151     2012      03        30        090              0.146292      12.917480       0.115653       0.294854       0.089000   -9999.000000       0.041300   -9999.000000
57024     57024     shaanxi        107.6500       34.4500          102       151     2012      03        31        091              0.149292       8.875732       0.302479       0.290633       0.094000   -9999.000000       0.045500       0.193000
57024     57024     shaanxi        107.6500       34.4500          102       151     2012      04        01        092              0.183250      12.798584       0.134310       0.285797       0.106000   -9999.000000   -9999.000000   -9999.000000
57024     57024     shaanxi        107.6500       34.4500          102       151     2012      04        02        093              0.175500      13.914001       0.092436       0.284591       0.106000   -9999.000000       0.047700       0.290000
57024     57024     shaanxi        107.6500       34.4500          102       151     2012      04        03        094              0.165792      10.976532       0.000000       0.281497       0.103000   -9999.000000       0.043300       0.236000
57024     57024     shaanxi        107.6500       34.4500          102       151     2012      04        04        095              0.191208      12.084839       0.000000       0.277835       0.096000   -9999.000000       0.053600   -9999.000000
57024     57024     shaanxi        107.6500       34.4500          102       151     2012      04        05        096              0.178500      14.959534       0.000000       0.272634       0.089500   -9999.000000       0.043200       0.280000
57024     57024     shaanxi        107.6500       34.4500          102       151     2012      04        06        097              0.172417      12.999664       0.000000       0.270838       0.103000   -9999.000000       0.044100   -9999.000000
57024     57024     shaanxi        107.6500       34.4500          102       151     2012      04        07        098              0.169750      12.957153       0.000000       0.270104   -9999.000000   -9999.000000   -9999.000000       0.217000
57024     57024     shaanxi        107.6500       34.4500          102       151     2012      04        08        099              0.167500      14.706512       0.000000       0.266210       0.100000   -9999.000000       0.049400   -9999.000000
57024     57024     shaanxi        107.6500       34.4500          102       151     2012      04        09        100              0.162542      16.785004       0.042441       0.262620       0.101500       0.157400       0.058600   -9999.000000
57024     57024     shaanxi        107.6500       34.4500          102       151     2012      04        10        101              0.179333      13.588776       0.000000       0.266959       0.091500   -9999.000000       0.053800       0.188000
57024     57024     shaanxi        107.6500       34.4500          102       151     2012      04        11        102              0.175333      17.279358       5.749539       0.262027       0.120000   -9999.000000       0.051700   -9999.000000
57024     57024     shaanxi        107.6500       34.4500          102       151     2012      04        12        103              0.179042      13.984039       0.922853       0.274771   -9999.000000   -9999.000000   -9999.000000       0.251000
57024     57024     shaanxi        107.6500       34.4500          102       151     2012      04        13        104              0.176792       9.348114       0.000000       0.294436       0.108000   -9999.000000   -9999.000000   -9999.000000
57024     57024     shaanxi        107.6500       34.4500          102       151     2012      04        14        105              0.174375      13.826416       0.000000       0.279238       0.103000   -9999.000000       0.052000       0.479000
57024     57024     shaanxi        107.6500       34.4500          102       151     2012      04        15        106              0.173583      15.158325       0.000000       0.273469       0.098500   -9999.000000       0.056400       0.156000
57024     57024     shaanxi        107.6500       34.4500          102       151     2012      04        16        107              0.180625      17.260742       0.211393       0.266468       0.103000   -9999.000000       0.055100   -9999.000000
57024     57024     shaanxi        107.6500       34.4500          102       151     2012      04        17        108              0.175792      17.424683       0.228418       0.262614       0.118000   -9999.000000       0.062300       0.037000
57024     57024     shaanxi        107.6500       34.4500          102       151     2012      04        18        109              0.176125      13.838348       0.000000       0.267975       0.102000   -9999.000000   -9999.000000   -9999.000000
57024     57024     shaanxi        107.6500       34.4500          102       151     2012      04        19        110              0.169417      17.436401       2.452574       0.261126       0.110000   -9999.000000       0.071700       0.468000
57024     57024     shaanxi        107.6500       34.4500          102       151     2012      04        20        111              0.170208      13.977478       0.000000       0.276816       0.093500   -9999.000000       0.054700       0.102000
57024     57024     shaanxi        107.6500       34.4500          102       151     2012      04        21        112              0.169792      16.123260       0.301651       0.268829       0.150500   -9999.000000       0.065700       0.451000
57024     57024     shaanxi        107.6500       34.4500          102       151     2012      04        22        113              0.166042      18.885956       0.000000       0.257098       0.146000   -9999.000000   -9999.000000       0.275000
57024     57024     shaanxi        107.6500       34.4500          102       151     2012      04        23        114              0.163083      20.627594       1.586181       0.249566       0.202000   -9999.000000       0.078600   -9999.000000
57024     57024     shaanxi        107.6500       34.4500          102       151     2012      04        24        115              0.188000      18.385803       0.795312       0.256249       0.164000   -9999.000000   -9999.000000       0.481000
57024     57024     shaanxi        107.6500       34.4500          102       151     2012      04        25        116              0.000000      16.318634       0.000000       0.254930       0.136500   -9999.000000       0.083800       0.253000
57024     57024     shaanxi        107.6500       34.4500          102       151     2012      04        26        117              0.181208      16.536407       0.173568       0.243998       0.131500   -9999.000000       0.090100       0.560000
57024     57024     shaanxi        107.6500       34.4500          102       151     2012      04        27        118              0.178000      19.509491       0.000000       0.235327       0.138000   -9999.000000       0.078400       0.173000
57024     57024     shaanxi        107.6500       34.4500          102       151     2012      04        28        119              0.173708      21.541901       4.277612       0.227267   -9999.000000   -9999.000000       0.078500   -9999.000000
57024     57024     shaanxi        107.6500       34.4500          102       151     2012      04        29        120              0.171125      21.605682       0.000000       0.249512       0.135000   -9999.000000   -9999.000000       0.323000
57024     57024     shaanxi        107.6500       34.4500          102       151     2012      04        30        121              0.168000      20.920654       1.800586       0.249777       0.149500   -9999.000000   -9999.000000   -9999.000000
57024     57024     shaanxi        107.6500       34.4500          102       151     2012      05        01        122              0.169417      16.713867       0.238947       0.249621       0.179500       0.105800       0.119500       0.361000
57024     57024     shaanxi        107.6500       34.4500          102       151     2012      05        02        123              0.176208      16.287781       5.128119       0.254101   -9999.000000   -9999.000000       0.151800       0.610000
57024     57024     shaanxi        107.6500       34.4500          102       151     2012      05        03        124              0.185250      15.850159       0.551900       0.281940   -9999.000000   -9999.000000       0.125000   -9999.000000
57024     57024     shaanxi        107.6500       34.4500          102       151     2012      05        04        125              0.185583      16.405304       0.195907       0.284065       0.178000   -9999.000000       0.124500       0.425000
57024     57024     shaanxi        107.6500       34.4500          102       151     2012      05        05        126              0.185417      18.509949       0.546466       0.273682       0.148500   -9999.000000   -9999.000000   -9999.000000
57024     57024     shaanxi        107.6500       34.4500          102       151     2012      05        06        127              0.180417      21.461273       0.182412       0.261300       0.162500   -9999.000000       0.143200       0.378000
57024     57024     shaanxi        107.6500       34.4500          102       151     2012      05        07        128              0.179833      19.770630       0.657648       0.260209   -9999.000000       0.097500       0.114200   -9999.000000
57024     57024     shaanxi        107.6500       34.4500          102       151     2012      05        08        129              0.180875      20.681427       0.125712       0.261217       0.157000   -9999.000000       0.124000   -9999.000000
57024     57024     shaanxi        107.6500       34.4500          102       151     2012      05        09        130              0.174875      22.909851       0.692890       0.252908   -9999.000000   -9999.000000       0.119300       0.441000
57024     57024     shaanxi        107.6500       34.4500          102       151     2012      05        10        131              0.190917      21.663147      17.287567       0.253472   -9999.000000   -9999.000000       0.107500   -9999.000000
57024     57024     shaanxi        107.6500       34.4500          102       151     2012      05        11        132              0.252208      22.309692       0.356647       0.278752       0.224000   -9999.000000   -9999.000000       0.649000
57024     57024     shaanxi        107.6500       34.4500          102       151     2012      05        12        133              0.222250      18.530182       0.000000       0.311303       0.225000   -9999.000000       0.125600   -9999.000000
57024     57024     shaanxi        107.6500       34.4500          102       151     2012      05        13        134              0.205208      16.461121       0.617296       0.290464   -9999.000000   -9999.000000       0.126700       0.656000
57024     57024     shaanxi        107.6500       34.4500          102       151     2012      05        14        135              0.202042      14.756989       0.000000       0.287383       0.199000   -9999.000000       0.156000       0.316000
57024     57024     shaanxi        107.6500       34.4500          102       151     2012      05        15        136              0.196250      17.671478       0.000000       0.276474       0.222000       0.050700       0.160900   -9999.000000
57024     57024     shaanxi        107.6500       34.4500          102       151     2012      05        16        137              0.191542      19.168396       0.000000       0.266249       0.186000   -9999.000000   -9999.000000       0.362000
57024     57024     shaanxi        107.6500       34.4500          102       151     2012      05        17        138              0.187417      20.159973       0.105418       0.257767       0.192500   -9999.000000   -9999.000000   -9999.000000
57024     57024     shaanxi        107.6500       34.4500          102       151     2012      05        18        139              0.185833      20.335754       0.000000       0.251070       0.194000   -9999.000000       0.143400       0.547000
57024     57024     shaanxi        107.6500       34.4500          102       151     2012      05        19        140              0.182208      22.046112       0.082071       0.244509   -9999.000000   -9999.000000       0.165500       0.365000
57024     57024     shaanxi        107.6500       34.4500          102       151     2012      05        20        141              0.175917      23.529633       3.372292       0.236146   -9999.000000       0.063000       0.141000       0.482000
57024     57024     shaanxi        107.6500       34.4500          102       151     2012      05        21        142              0.248458      21.414642      16.354778       0.239892       0.315000   -9999.000000       0.233000       0.827000
57024     57024     shaanxi        107.6500       34.4500          102       151     2012      05        22        143              0.264042      16.312073       0.234200       0.327829       0.254500   -9999.000000   -9999.000000   -9999.000000
57024     57024     shaanxi        107.6500       34.4500          102       151     2012      05        23        144              0.249500      16.965424       0.339731       0.305743   -9999.000000   -9999.000000       0.220300       0.683000
57024     57024     shaanxi        107.6500       34.4500          102       151     2012      05        24        145              0.239875      16.320862       0.294866       0.297108       0.282000   -9999.000000       0.200200       0.407000
57024     57024     shaanxi        107.6500       34.4500          102       151     2012      05        25        146              0.000000      15.886566       0.000000       0.293308       0.260000       0.260200       0.216400       0.643000
57024     57024     shaanxi        107.6500       34.4500          102       151     2012      05        26        147              0.221750      18.302612       0.120084       0.285108       0.165000   -9999.000000       0.191800       0.506000
57024     57024     shaanxi        107.6500       34.4500          102       151     2012      05        27        148              0.211875      21.476135       0.000000       0.274923       0.195000   -9999.000000       0.178800   -9999.000000
57024     57024     shaanxi        107.6500       34.4500          102       151     2012      05        28        149              0.232875      22.739838      18.640110       0.264948   -9999.000000   -9999.000000   -9999.000000       0.848000
57024     57024     shaanxi        107.6500       34.4500          102       151     2012      05        29        150              0.249167      16.968323       0.000000       0.331278       0.237000   -9999.000000       0.189500   -9999.000000
57024     57024     shaanxi        107.6500       34.4500          102       151     2012      05        30        151              0.224500      19.740082       0.000000       0.310784       0.230000   -9999.000000       0.207800   -9999.000000
57024     57024     shaanxi        107.6500       34.4500          102       151     2012      05        31        152              0.209000      21.174164       0.000000       0.295809       0.226000   -9999.000000       0.189900   -9999.000000
57024     57024     shaanxi        107.6500       34.4500          102       151     2012      06        01        153              0.205833      19.488525       0.000000       0.292277       0.172500   -9999.000000       0.190700   -9999.000000
57024     57024     shaanxi        107.6500       34.4500          102       151     2012      06        02        154              0.199208      21.620209       0.430186       0.282098       0.178500   -9999.000000   -9999.000000       0.502000
57024     57024     shaanxi        107.6500       34.4500          102       151     2012      06        03        155              0.194833      21.915100       0.551553       0.274884       0.185000   -9999.000000   -9999.000000   -9999.000000
57024     57024     shaanxi        107.6500       34.4500          102       151     2012      06        04        156              0.193417      21.222992       0.260141       0.272162   -9999.000000   -9999.000000       0.193800       0.611000
57024     57024     shaanxi        107.6500       34.4500          102       151     2012      06        05        157              0.186083      22.165070       2.063606       0.266230       0.208000   -9999.000000       0.247300   -9999.000000
57024     57024     shaanxi        107.6500       34.4500          102       151     2012      06        06        158              0.190250      19.050873       0.330039       0.280916       0.166500       0.126900       0.217900   -9999.000000
57024     57024     shaanxi        107.6500       34.4500          102       151     2012      06        07        159              0.188917      21.602142       0.000000       0.271548       0.166500       0.199300       0.208600       0.476000
57024     57024     shaanxi        107.6500       34.4500          102       151     2012      06        08        160              0.180625      23.039520       0.524171       0.260194       0.192000   -9999.000000   -9999.000000   -9999.000000
57024     57024     shaanxi        107.6500       34.4500          102       151     2012      06        09        161              0.182458      21.201599       0.000000       0.255501   -9999.000000   -9999.000000       0.207200       0.592000
57024     57024     shaanxi        107.6500       34.4500          102       151     2012      06        10        162              0.177792      24.050751       1.053514       0.244606       0.175000   -9999.000000       0.203000   -9999.000000
57024     57024     shaanxi        107.6500       34.4500          102       151     2012      06        11        163              0.000000      24.437225       0.000000       0.234491       0.171000   -9999.000000       0.238200       0.580000
57024     57024     shaanxi        107.6500       34.4500          102       151     2012      06        12        164              0.168500      23.787811       0.000000       0.225181       0.172000   -9999.000000       0.224500       0.465000
57024     57024     shaanxi        107.6500       34.4500          102       151     2012      06        13        165              0.164583      25.465424       0.000000       0.214465       0.188000   -9999.000000       0.208100   -9999.000000
57024     57024     shaanxi        107.6500       34.4500          102       151     2012      06        14        166              0.157125      26.525360       0.000000       0.204587       0.193000   -9999.000000   -9999.000000       0.415000
57024     57024     shaanxi        107.6500       34.4500          102       151     2012      06        15        167              0.150417      24.269409       0.000000       0.197000       0.179000   -9999.000000       0.222400   -9999.000000
57024     57024     shaanxi        107.6500       34.4500          102       151     2012      06        16        168              0.145583      24.470245       0.126159       0.192368       0.189000   -9999.000000       0.241000       0.582000
57024     57024     shaanxi        107.6500       34.4500          102       151     2012      06        17        169              0.152042      25.754211       0.000000       0.187681       0.174500   -9999.000000       0.223700       0.440000
57024     57024     shaanxi        107.6500       34.4500          102       151     2012      06        18        170              0.151500      25.779785       0.063976       0.184309       0.183000   -9999.000000       0.252800       0.649000
57024     57024     shaanxi        107.6500       34.4500          102       151     2012      06        19        171              0.150333      26.001404       0.000000       0.181526       0.198000   -9999.000000   -9999.000000       0.456000
57024     57024     shaanxi        107.6500       34.4500          102       151     2012      06        20        172              0.157167      25.873718       0.000000       0.178560       0.181000   -9999.000000       0.257100   -9999.000000
57024     57024     shaanxi        107.6500       34.4500          102       151     2012      06        21        173              0.161125      27.446320       1.123105       0.174857       0.190000   -9999.000000       0.208400       0.428000
57024     57024     shaanxi        107.6500       34.4500          102       151     2012      06        22        174              0.155875      28.882507       0.612702       0.177802       0.158500   -9999.000000       0.260400       0.552000
57024     57024     shaanxi        107.6500       34.4500          102       151     2012      06        23        175              0.149083      28.329315       0.067943       0.182749       0.160000   -9999.000000       0.232300       0.691000
57024     57024     shaanxi        107.6500       34.4500          102       151     2012      06        24        176              0.141583      28.278717       0.384207       0.176122       0.196000       0.165900       0.249500       0.447000
57024     57024     shaanxi        107.6500       34.4500          102       151     2012      06        25        177              0.132667      26.243530       3.573451       0.173897   -9999.000000       0.141000   -9999.000000   -9999.000000
57024     57024     shaanxi        107.6500       34.4500          102       151     2012      06        26        178              0.130708      23.352325       3.409018       0.217710   -9999.000000   -9999.000000       0.276100       0.613000
57024     57024     shaanxi        107.6500       34.4500          102       151     2012      06        27        179              0.131250      22.631897       1.979102       0.225665       0.207000   -9999.000000       0.249500   -9999.000000
57024     57024     shaanxi        107.6500       34.4500          102       151     2012      06        28        180              0.131958      22.451508      10.969717       0.240299       0.247500   -9999.000000       0.329500       0.867000
57024     57024     shaanxi        107.6500       34.4500          102       151     2012      06        29        181              0.269042      21.662262      16.516146       0.266582       0.259000   -9999.000000       0.296700   -9999.000000
57024     57024     shaanxi        107.6500       34.4500          102       151     2012      06        30        182              0.241000      21.126343       0.000000       0.333080   -9999.000000       0.246800   -9999.000000   -9999.000000
57024     57024     shaanxi        107.6500       34.4500          102       151     2012      07        01        183              0.212208      23.703735       2.239854       0.294960       0.200000   -9999.000000   -9999.000000       0.597000
57024     57024     shaanxi        107.6500       34.4500          102       151     2012      07        02        184              0.252958      25.067352       6.371789       0.284406       0.230000   -9999.000000       0.323100   -9999.000000
57024     57024     shaanxi        107.6500       34.4500          102       151     2012      07        03        185              0.244333      21.639496       5.696239       0.313927       0.177000   -9999.000000       0.340800       0.651000
57024     57024     shaanxi        107.6500       34.4500          102       151     2012      07        04        186              0.221167      24.677094       0.152835       0.307631       0.193000   -9999.000000       0.332400   -9999.000000
57024     57024     shaanxi        107.6500       34.4500          102       151     2012      07        05        187              0.207167      23.254395       0.000000       0.299917       0.204000       0.238400       0.342900   -9999.000000
57024     57024     shaanxi        107.6500       34.4500          102       151     2012      07        06        188              0.193625      25.233063       1.684325       0.281933   -9999.000000   -9999.000000   -9999.000000       0.537000
57024     57024     shaanxi        107.6500       34.4500          102       151     2012      07        07        189              0.191500      25.073273      15.255503       0.280275   -9999.000000   -9999.000000       0.318200   -9999.000000
57024     57024     shaanxi        107.6500       34.4500          102       151     2012      07        08        190              0.293375      24.282349      35.225216       0.299697       0.251000       0.125100       0.332000       1.000000
57024     57024     shaanxi        107.6500       34.4500          102       151     2012      07        09        191              0.265417      21.992798       2.913038       0.378261       0.242000   -9999.000000       0.371400   -9999.000000
57024     57024     shaanxi        107.6500       34.4500          102       151     2012      07        10        192              0.248458      21.415741       0.000000       0.350294       0.217000   -9999.000000       0.337800       0.915000
57024     57024     shaanxi        107.6500       34.4500          102       151     2012      07        11        193              0.228000      25.475555       0.202702       0.330451   -9999.000000   -9999.000000       0.319100       0.745000
57024     57024     shaanxi        107.6500       34.4500          102       151     2012      07        12        194              0.209250      25.078125       0.316991       0.321644       0.196000   -9999.000000   -9999.000000   -9999.000000
57024     57024     shaanxi        107.6500       34.4500          102       151     2012      07        13        195              0.194250      25.926788       1.980881       0.313267       0.183500       0.128100       0.321400       0.668000
57024     57024     shaanxi        107.6500       34.4500          102       151     2012      07        14        196              0.184125      25.321014       0.636344       0.311857       0.187500   -9999.000000       0.334500   -9999.000000
57024     57024     shaanxi        107.6500       34.4500          102       151     2012      07        15        197              0.176208      25.003632       0.000000       0.303934       0.224000   -9999.000000       0.316100       0.742000
57024     57024     shaanxi        107.6500       34.4500          102       151     2012      07        16        198              0.175792      25.227325       1.353922       0.298469   -9999.000000   -9999.000000       0.331300       0.595000
57024     57024     shaanxi        107.6500       34.4500          102       151     2012      07        17        199              0.176042      24.424500       0.000000       0.298035       0.203000   -9999.000000   -9999.000000       0.685000
57024     57024     shaanxi        107.6500       34.4500          102       151     2012      07        18        200              0.177458      23.492462       0.000000       0.296984       0.187000       0.160000   -9999.000000       0.531000
57024     57024     shaanxi        107.6500       34.4500          102       151     2012      07        19        201              0.177125      24.660339       0.294071       0.291094       0.185500   -9999.000000       0.281000   -9999.000000
57024     57024     shaanxi        107.6500       34.4500          102       151     2012      07        20        202              0.176565      24.878723       1.234239       0.288788       0.255000   -9999.000000       0.310400       0.513000
57024     57024     shaanxi        107.6500       34.4500          102       151     2012      07        21        203              0.185130      24.660950      20.729797       0.291972   -9999.000000   -9999.000000       0.303000       0.986000
57024     57024     shaanxi        107.6500       34.4500          102       151     2012      07        22        204              0.196375      22.209991       0.157285       0.348423   -9999.000000   -9999.000000       0.350200       0.912000
57024     57024     shaanxi        107.6500       34.4500          102       151     2012      07        23        205              0.185208      24.415680       3.744914       0.321304       0.298000       0.125300   -9999.000000       0.818000
57024     57024     shaanxi        107.6500       34.4500          102       151     2012      07        24        206              0.187417      22.017609       0.511925       0.324926       0.231000   -9999.000000       0.257300   -9999.000000
57024     57024     shaanxi        107.6500       34.4500          102       151     2012      07        25        207              0.186917      23.647766       0.000000       0.317615       0.223500   -9999.000000       0.211400       0.767000
57024     57024     shaanxi        107.6500       34.4500          102       151     2012      07        26        208              0.187250      25.738800       0.136788       0.308580       0.237000       0.068400       0.250600   -9999.000000
57024     57024     shaanxi        107.6500       34.4500          102       151     2012      07        27        209              0.186708      26.553192       9.187087       0.302211   -9999.000000   -9999.000000       0.222800       0.767000
57024     57024     shaanxi        107.6500       34.4500          102       151     2012      07        28        210              0.164583      27.262817       0.817744       0.315180       0.215000   -9999.000000       0.228800       0.573000
57024     57024     shaanxi        107.6500       34.4500          102       151     2012      07        29        211              0.159250      27.771881       0.000000       0.309714       0.178500   -9999.000000   -9999.000000   -9999.000000
57024     57024     shaanxi        107.6500       34.4500          102       151     2012      07        30        212              0.151750      28.387299       2.815710       0.296878       0.249000       0.054200       0.139200       0.642000
57024     57024     shaanxi        107.6500       34.4500          102       151     2012      07        31        213              0.147750      25.344116       0.102434       0.302307       0.232000   -9999.000000       0.155400   -9999.000000
57024     57024     shaanxi        107.6500       34.4500          102       151     2012      08        01        214              0.145333      23.380188       2.019457       0.296228       0.220000   -9999.000000       0.138500       0.665000
57024     57024     shaanxi        107.6500       34.4500          102       151     2012      08        02        215              0.147958      22.669952       1.831919       0.297726       0.219000   -9999.000000       0.146300   -9999.000000
57024     57024     shaanxi        107.6500       34.4500          102       151     2012      08        03        216              0.149333      24.605225       3.506875       0.301971       0.221000   -9999.000000   -9999.000000   -9999.000000
57024     57024     shaanxi        107.6500       34.4500          102       151     2012      08        04        217              0.149958      25.560852       0.090871       0.305124       0.193500       0.062700   -9999.000000       0.660000
57024     57024     shaanxi        107.6500       34.4500          102       151     2012      08        05        218              0.181667      25.166626       3.938290       0.299949       0.232000       0.070200       0.150800   -9999.000000
57024     57024     shaanxi        107.6500       34.4500          102       151     2012      08        06        219              0.183292      24.456909       0.969260       0.307045       0.252000   -9999.000000       0.125800       0.673000
57024     57024     shaanxi        107.6500       34.4500          102       151     2012      08        07        220              0.171792      24.915131       1.311784       0.301841   -9999.000000   -9999.000000       0.109700   -9999.000000
57024     57024     shaanxi        107.6500       34.4500          102       151     2012      08        08        221              0.166708      26.066681       3.523120       0.297939       0.238000   -9999.000000       0.118200       0.819000
57024     57024     shaanxi        107.6500       34.4500          102       151     2012      08        09        222              0.163375      25.333405      11.419231       0.303339       0.240000   -9999.000000   -9999.000000       0.678000
57024     57024     shaanxi        107.6500       34.4500          102       151     2012      08        10        223              0.157375      25.625671       0.000000       0.335228       0.203000       0.200500       0.121800   -9999.000000
57024     57024     shaanxi        107.6500       34.4500          102       151     2012      08        11        224              0.157750      24.335114       0.068709       0.308777       0.249000   -9999.000000       0.114200       0.651000
57024     57024     shaanxi        107.6500       34.4500          102       151     2012      08        12        225              0.171292      25.790375      17.440943       0.298337       0.221000   -9999.000000       0.121000   -9999.000000
57024     57024     shaanxi        107.6500       34.4500          102       151     2012      08        13        226              0.245917      25.835541      26.791327       0.316312   -9999.000000       0.135800       0.224500       1.000000
57024     57024     shaanxi        107.6500       34.4500          102       151     2012      08        14        227              0.235500      22.157593       3.366010       0.369627       0.300000   -9999.000000       0.203300       0.938000
57024     57024     shaanxi        107.6500       34.4500          102       151     2012      08        15        228              0.219417      22.219055       0.000000       0.357049       0.287500   -9999.000000   -9999.000000       0.893000
57024     57024     shaanxi        107.6500       34.4500          102       151     2012      08        16        229              0.207458      24.409302       0.446683       0.337228       0.290000   -9999.000000       0.180900       0.845000
57024     57024     shaanxi        107.6500       34.4500          102       151     2012      08        17        230              0.220958      24.016663      30.197613       0.330174       0.355000   -9999.000000       0.215800   -9999.000000
57024     57024     shaanxi        107.6500       34.4500          102       151     2012      08        18        231              0.236333      22.114624       6.260196       0.368473   -9999.000000       0.203300       0.190300       1.000000
57024     57024     shaanxi        107.6500       34.4500          102       151     2012      08        19        232              0.248458      20.019440      15.627144       0.363941       0.355000   -9999.000000       0.203100       0.977000
57024     57024     shaanxi        107.6500       34.4500          102       151     2012      08        20        233              0.230125      19.890472       0.410442       0.372824       0.356000   -9999.000000   -9999.000000       0.953000
57024     57024     shaanxi        107.6500       34.4500          102       151     2012      08        21        234              0.218917      20.340393       0.000000       0.353174       0.259000   -9999.000000       0.112300   -9999.000000
57024     57024     shaanxi        107.6500       34.4500          102       151     2012      08        22        235              0.203000      21.567505       0.000000       0.342783       0.242000       0.100300       0.095600   -9999.000000
57024     57024     shaanxi        107.6500       34.4500          102       151     2012      08        23        236              0.192083      21.300262       0.000000       0.334755   -9999.000000       0.101700       0.107400       0.609000
57024     57024     shaanxi        107.6500       34.4500          102       151     2012      08        24        237              0.185917      21.391022       0.000000       0.329553   -9999.000000   -9999.000000       0.087300   -9999.000000
57024     57024     shaanxi        107.6500       34.4500          102       151     2012      08        25        238              0.000000      21.866089       1.477989       0.325046       0.230500   -9999.000000       0.091300       0.683000
57024     57024     shaanxi        107.6500       34.4500          102       151     2012      08        26        239              0.178875      23.087311       0.000000       0.323981       0.220500   -9999.000000   -9999.000000       0.584000
57024     57024     shaanxi        107.6500       34.4500          102       151     2012      08        27        240              0.175083      23.100677       1.101807       0.322674       0.239000       0.089100       0.177500   -9999.000000
57024     57024     shaanxi        107.6500       34.4500          102       151     2012      08        28        241              0.172917      22.279053       0.000000       0.321738       0.249000       0.133700       0.162700       0.705000
57024     57024     shaanxi        107.6500       34.4500          102       151     2012      08        29        242              0.170292      23.242706       0.000000       0.315453       0.234000   -9999.000000       0.181200   -9999.000000
57024     57024     shaanxi        107.6500       34.4500          102       151     2012      08        30        243              0.183083      23.607880      26.339897       0.309378   -9999.000000       0.029400       0.179100       0.708000
57024     57024     shaanxi        107.6500       34.4500          102       151     2012      08        31        244              0.267125      23.086365      42.066715       0.334016       0.373500       0.297800   -9999.000000   -9999.000000
57024     57024     shaanxi        107.6500       34.4500          102       151     2012      09        01        245              0.261375      19.720551      19.765226       0.390893       0.293000   -9999.000000   -9999.000000   -9999.000000
57024     57024     shaanxi        107.6500       34.4500          102       151     2012      09        02        246              0.267458      17.040527       0.576101       0.384133       0.241000   -9999.000000       0.193200       0.876000
57024     57024     shaanxi        107.6500       34.4500          102       151     2012      09        03        247              0.259667      19.360901       0.000000       0.357791   -9999.000000   -9999.000000       0.167200   -9999.000000
57024     57024     shaanxi        107.6500       34.4500          102       151     2012      09        04        248              0.246625      20.308014       0.000000       0.347887       0.233000       0.105900       0.132500       0.638000
57024     57024     shaanxi        107.6500       34.4500          102       151     2012      09        05        249              0.238958      21.087250       0.000000       0.341169       0.192000       0.110800       0.149200   -9999.000000
57024     57024     shaanxi        107.6500       34.4500          102       151     2012      09        06        250              0.232083      22.195770       0.226612       0.336582       0.191000   -9999.000000   -9999.000000       0.823000
57024     57024     shaanxi        107.6500       34.4500          102       151     2012      09        07        251              0.271208      22.271118      42.893761       0.332764       0.251000   -9999.000000       0.186200       1.000000
57024     57024     shaanxi        107.6500       34.4500          102       151     2012      09        08        252              0.292542      19.558197       4.216358       0.376897       0.324000   -9999.000000       0.155900   -9999.000000
57024     57024     shaanxi        107.6500       34.4500          102       151     2012      09        09        253              0.284125      19.373108       4.462530       0.368544       0.283000   -9999.000000       0.146700       0.988000
57024     57024     shaanxi        107.6500       34.4500          102       151     2012      09        10        254              0.300583      19.675842      26.305428       0.358698       0.298000       0.086300       0.248400   -9999.000000
57024     57024     shaanxi        107.6500       34.4500          102       151     2012      09        11        255              0.282917      17.870026       0.000000       0.383573       0.251000   -9999.000000       0.242200       0.983000
57024     57024     shaanxi        107.6500       34.4500          102       151     2012      09        12        256              0.267958      19.273438       0.000000       0.357794       0.256000   -9999.000000   -9999.000000       0.787000
57024     57024     shaanxi        107.6500       34.4500          102       151     2012      09        13        257              0.258167      15.914429       0.000000       0.348819       0.209000   -9999.000000       0.217300       0.802000
57024     57024     shaanxi        107.6500       34.4500          102       151     2012      09        14        258              0.245667      16.288177       0.000000       0.342399       0.218000   -9999.000000       0.233800       0.654000
57024     57024     shaanxi        107.6500       34.4500          102       151     2012      09        15        259              0.236958      17.141144       5.151705       0.337308       0.278000       0.144500       0.235200   -9999.000000
57024     57024     shaanxi        107.6500       34.4500          102       151     2012      09        16        260              0.238167      16.260834       3.595254       0.346119       0.272000   -9999.000000       0.254800       0.969000
57024     57024     shaanxi        107.6500       34.4500          102       151     2012      09        17        261              0.240583      14.943359       0.000000       0.348363       0.225000   -9999.000000   -9999.000000       0.738000
57024     57024     shaanxi        107.6500       34.4500          102       151     2012      09        18        262              0.235833      17.242523       0.465672       0.339469       0.215000       0.114800   -9999.000000       0.835000
57024     57024     shaanxi        107.6500       34.4500          102       151     2012      09        19        263              0.230333      18.515594       1.963179       0.335107   -9999.000000   -9999.000000       0.143700       0.707000
57024     57024     shaanxi        107.6500       34.4500          102       151     2012      09        20        264              0.223958      19.043610       2.474574       0.335208       0.261000   -9999.000000       0.184600   -9999.000000
57024     57024     shaanxi        107.6500       34.4500          102       151     2012      09        21        265              0.228208      16.824005       0.000000       0.338285   -9999.000000   -9999.000000       0.158500       0.727000
57024     57024     shaanxi        107.6500       34.4500          102       151     2012      09        22        266              0.223042      18.816040       0.000000       0.332433       0.168000   -9999.000000       0.165800   -9999.000000
57024     57024     shaanxi        107.6500       34.4500          102       151     2012      09        23        267              0.220417      18.465271       0.195296       0.329631       0.177000   -9999.000000   -9999.000000       0.654000
57024     57024     shaanxi        107.6500       34.4500          102       151     2012      09        24        268              0.218167      18.496185      10.994217       0.328461       0.204000   -9999.000000       0.148200       0.828000
57024     57024     shaanxi        107.6500       34.4500          102       151     2012      09        25        269              0.272583      18.102386       7.912441       0.340024       0.233000       0.190500       0.127500   -9999.000000
57024     57024     shaanxi        107.6500       34.4500          102       151     2012      09        26        270              0.264375      15.382385       0.000000       0.359702       0.237000   -9999.000000       0.142300       0.807000
57024     57024     shaanxi        107.6500       34.4500          102       151     2012      09        27        271              0.257286      17.282837       0.000000       0.342880       0.183500   -9999.000000       0.126800   -9999.000000
57024     57024     shaanxi        107.6500       34.4500          102       151     2012      09        28        272              0.233333      17.164673       0.000000       0.335970       0.179000   -9999.000000       0.112600       0.601000
57024     57024     shaanxi        107.6500       34.4500          102       151     2012      09        29        273              0.228417      14.922333       0.379287       0.331166       0.173000   -9999.000000   -9999.000000   -9999.000000
57024     57024     shaanxi        107.6500       34.4500          102       151     2012      09        30        274              0.222375      15.602692       0.000000       0.328512   -9999.000000   -9999.000000       0.111200   -9999.000000
57024     57024     shaanxi        107.6500       34.4500          102       151     2012      10        01        275              0.217958      16.240082       0.000000       0.325951       0.182000   -9999.000000       0.176500       0.641000
57024     57024     shaanxi        107.6500       34.4500          102       151     2012      10        02        276              0.248542      16.657257      15.420047       0.323927       0.214000   -9999.000000       0.165900   -9999.000000
57024     57024     shaanxi        107.6500       34.4500          102       151     2012      10        03        277              0.266625      14.771484       0.065952       0.352918       0.182500       0.304600       0.183200       0.808000
57024     57024     shaanxi        107.6500       34.4500          102       151     2012      10        04        278              0.266292      16.989777       1.812939       0.342115       0.201000   -9999.000000   -9999.000000   -9999.000000
57024     57024     shaanxi        107.6500       34.4500          102       151     2012      10        05        279              0.260542      14.556427       0.000000       0.341329       0.194000   -9999.000000   -9999.000000       0.856000
57024     57024     shaanxi        107.6500       34.4500          102       151     2012      10        06        280              0.250542      15.646179       0.000000       0.334857       0.189000       0.269000       0.151600       0.748000
57024     57024     shaanxi        107.6500       34.4500          102       151     2012      10        07        281              0.245083      13.855682       0.000000       0.332828       0.195000   -9999.000000       0.181900   -9999.000000
57024     57024     shaanxi        107.6500       34.4500          102       151     2012      10        08        282              0.251250      14.018616       4.502676       0.331690       0.219000       0.210300       0.153300       0.904000
57024     57024     shaanxi        107.6500       34.4500          102       151     2012      10        09        283              0.251292      13.360107       0.000000       0.341539       0.184000   -9999.000000       0.142600   -9999.000000
57024     57024     shaanxi        107.6500       34.4500          102       151     2012      10        10        284              0.240208      14.521301       0.000000       0.333232       0.180000   -9999.000000   -9999.000000       0.862000
57024     57024     shaanxi        107.6500       34.4500          102       151     2012      10        11        285              0.232792      14.897217       0.260030       0.329530   -9999.000000       0.107700       0.135800       0.693000
57024     57024     shaanxi        107.6500       34.4500          102       151     2012      10        12        286              0.231167      13.781097       0.000000       0.329574       0.137000   -9999.000000       0.130800       0.779000
57024     57024     shaanxi        107.6500       34.4500          102       151     2012      10        13        287              0.227167      14.609985       0.000000       0.328578       0.120500       0.192300       0.143100       0.634000
57024     57024     shaanxi        107.6500       34.4500          102       151     2012      10        14        288              0.221750      15.759888       0.000000       0.325825       0.130500   -9999.000000       0.141300   -9999.000000
57024     57024     shaanxi        107.6500       34.4500          102       151     2012      10        15        289              0.218208      14.318695       2.168055       0.325578       0.150000   -9999.000000       0.125700       0.554000
57024     57024     shaanxi        107.6500       34.4500          102       151     2012      10        16        290              0.214333      12.438812       0.000000       0.328889   -9999.000000       0.141500   -9999.000000       0.569000
57024     57024     shaanxi        107.6500       34.4500          102       151     2012      10        17        291              0.209208      11.257080       0.000000       0.327084       0.141000   -9999.000000       0.130400       0.834000
57024     57024     shaanxi        107.6500       34.4500          102       151     2012      10        18        292              0.205625      11.494781       1.002266       0.323570       0.150500   -9999.000000       0.146500       0.550000
57024     57024     shaanxi        107.6500       34.4500          102       151     2012      10        19        293              0.206167       9.349487       0.000000       0.327578       0.138000   -9999.000000       0.122100   -9999.000000
57024     57024     shaanxi        107.6500       34.4500          102       151     2012      10        20        294              0.204375      12.566528       0.000000       0.324739       0.143000   -9999.000000       0.129900       0.572000
57024     57024     shaanxi        107.6500       34.4500          102       151     2012      10        21        295              0.199625      13.931671       0.126062       0.323143       0.192000       0.113100   -9999.000000   -9999.000000
57024     57024     shaanxi        107.6500       34.4500          102       151     2012      10        22        296              0.198708       8.960815       0.000000       0.323567   -9999.000000   -9999.000000   -9999.000000       0.597000
57024     57024     shaanxi        107.6500       34.4500          102       151     2012      10        23        297              0.196333      10.300262       3.837911       0.321394   -9999.000000   -9999.000000       0.119600       0.678000
57024     57024     shaanxi        107.6500       34.4500          102       151     2012      10        24        298              0.200500       8.131622       0.000000       0.333104   -9999.000000       0.118500       0.131600   -9999.000000
57024     57024     shaanxi        107.6500       34.4500          102       151     2012      10        25        299              0.000000      10.852661       0.070635       0.326562       0.162000   -9999.000000       0.112700       0.550000
57024     57024     shaanxi        107.6500       34.4500          102       151     2012      10        26        300              0.200458      11.548737       0.000000       0.324280       0.167000       0.125600       0.115800   -9999.000000
57024     57024     shaanxi        107.6500       34.4500          102       151     2012      10        27        301              0.197167      12.769379       0.000000       0.322607   -9999.000000   -9999.000000   -9999.000000       0.608000
57024     57024     shaanxi        107.6500       34.4500          102       151     2012      10        28        302              0.000000      12.228058       0.395306       0.321290       0.170000   -9999.000000       0.120100   -9999.000000
57024     57024     shaanxi        107.6500       34.4500          102       151     2012      10        29        303              0.195167      11.018494       0.164644       0.322261       0.154500       0.278300       0.105300   -9999.000000
57024     57024     shaanxi        107.6500       34.4500          102       151     2012      10        30        304              0.193292      10.907257       0.000000       0.322471       0.160000   -9999.000000       0.116700       0.564000
57024     57024     shaanxi        107.6500       34.4500          102       151     2012      10        31        305              0.191625       9.608154       0.000000       0.320133       0.170000       0.062300       0.106500   -9999.000000
57024     57024     shaanxi        107.6500       34.4500          102       151     2012      11        01        306              0.189875       9.564636       0.000000       0.318568       0.146000   -9999.000000   -9999.000000       0.514000
57024     57024     shaanxi        107.6500       34.4500          102       151     2012      11        02        307              0.189542       9.735474       0.117983       0.318499   -9999.000000       0.121400   -9999.000000   -9999.000000
57024     57024     shaanxi        107.6500       34.4500          102       151     2012      11        03        308              0.185458       9.825775       0.000000       0.317130   -9999.000000       0.023200       0.102800       0.612000
57024     57024     shaanxi        107.6500       34.4500          102       151     2012      11        04        309              0.182792       5.079193       0.157128       0.309454       0.127000   -9999.000000       0.115100       0.487000
57024     57024     shaanxi        107.6500       34.4500          102       151     2012      11        05        310              0.181333       4.780029       0.000000       0.309623       0.138000   -9999.000000       0.080200   -9999.000000
57024     57024     shaanxi        107.6500       34.4500          102       151     2012      11        06        311              0.182583       5.071747       0.983633       0.312152       0.150000   -9999.000000       0.095200       0.659000
57024     57024     shaanxi        107.6500       34.4500          102       151     2012      11        07        312              0.181583       6.331696       2.863516       0.316651   -9999.000000       0.200700   -9999.000000   -9999.000000
57024     57024     shaanxi        107.6500       34.4500          102       151     2012      11        08        313              0.183792       3.859924       0.000000       0.328902       0.150000   -9999.000000       0.107200       0.743000
57024     57024     shaanxi        107.6500       34.4500          102       151     2012      11        09        314              0.183833       6.232941       1.860135       0.322999       0.165500   -9999.000000       0.089700       0.677000
57024     57024     shaanxi        107.6500       34.4500          102       151     2012      11        10        315              0.187042       4.678772       0.087451       0.326407       0.136000   -9999.000000       0.094800       0.739000
57024     57024     shaanxi        107.6500       34.4500          102       151     2012      11        11        316              0.186542       3.274689       0.000000       0.309110       0.134000   -9999.000000       0.090400       0.401000
57024     57024     shaanxi        107.6500       34.4500          102       151     2012      11        12        317              0.187750       4.180389       0.000000       0.315639   -9999.000000   -9999.000000       0.084600   -9999.000000
57024     57024     shaanxi        107.6500       34.4500          102       151     2012      11        13        318              0.000000       5.962097       0.000000       0.320774   -9999.000000       0.107900   -9999.000000       0.524000
57024     57024     shaanxi        107.6500       34.4500          102       151     2012      11        14        319              0.184667       6.262451       0.000000       0.319533       0.131500   -9999.000000       0.076500       0.516000
57024     57024     shaanxi        107.6500       34.4500          102       151     2012      11        15        320              0.183500       4.601105       0.163566       0.319864   -9999.000000   -9999.000000       0.087200       0.585000
57024     57024     shaanxi        107.6500       34.4500          102       151     2012      11        16        321              0.184333       2.956085       1.003268       0.319453       0.129000       0.058000       0.075100       0.409000
57024     57024     shaanxi        107.6500       34.4500          102       151     2012      11        17        322              0.000000       5.270477       0.000000       0.319329       0.136000   -9999.000000       0.080500   -9999.000000
57024     57024     shaanxi        107.6500       34.4500          102       151     2012      11        18        323              0.183042       6.410858       0.000000       0.319248       0.135000       0.022600   -9999.000000       0.414000
57024     57024     shaanxi        107.6500       34.4500          102       151     2012      11        19        324              0.181875       5.986420       0.000000       0.318140       0.127000   -9999.000000   -9999.000000   -9999.000000
57024     57024     shaanxi        107.6500       34.4500          102       151     2012      11        20        325              0.180917       4.829926       0.000000       0.318405       0.128500       0.118500       0.066300       0.459000
57024     57024     shaanxi        107.6500       34.4500          102       151     2012      11        21        326              0.181958       4.200470       0.000000       0.319086       0.116500       0.162600       0.077600       0.381000
57024     57024     shaanxi        107.6500       34.4500          102       151     2012      11        22        327              0.179500       5.922913       0.000000       0.318758       0.125000   -9999.000000       0.064900   -9999.000000
57024     57024     shaanxi        107.6500       34.4500          102       151     2012      11        23        328              0.177167       3.580658       0.000000       0.308330   -9999.000000   -9999.000000       0.068200       0.352000
57024     57024     shaanxi        107.6500       34.4500          102       151     2012      11        24        329              0.175542       2.985229       0.720958       0.293043   -9999.000000   -9999.000000   -9999.000000   -9999.000000
57024     57024     shaanxi        107.6500       34.4500          102       151     2012      11        25        330              0.177042       1.492798       1.172220       0.291709       0.117000   -9999.000000       0.074900       0.408000
57024     57024     shaanxi        107.6500       34.4500          102       151     2012      11        26        331              0.176208       1.394196       0.000000       0.276313       0.115000       0.043700   -9999.000000   -9999.000000
57024     57024     shaanxi        107.6500       34.4500          102       151     2012      11        27        332              0.175792       1.494995       0.000000       0.267551       0.131000   -9999.000000       0.066800   -9999.000000
57024     57024     shaanxi        107.6500       34.4500          102       151     2012      11        28        333              0.174042       2.387787       0.000000       0.284212       0.124000   -9999.000000       0.062700       0.279000
57024     57024     shaanxi        107.6500       34.4500          102       151     2012      11        29        334              0.172000       0.736908       0.662338       0.251364   -9999.000000   -9999.000000       0.061600   -9999.000000
57024     57024     shaanxi        107.6500       34.4500          102       151     2012      11        30        335              0.172125      -0.551147       0.136795       0.211442   -9999.000000   -9999.000000   -9999.000000       0.354000
57024     57024     shaanxi        107.6500       34.4500          102       151     2012      12        01        336              0.174667       0.395325       0.152104       0.232521       0.119000       0.059200       0.063700   -9999.000000
57024     57024     shaanxi        107.6500       34.4500          102       151     2012      12        02        337              0.173667       0.838684       0.000000       0.249192       0.131000   -9999.000000       0.063000       0.409000
57024     57024     shaanxi        107.6500       34.4500          102       151     2012      12        03        338              0.173250       1.239838       0.000000       0.264640       0.132000   -9999.000000       0.051200       0.346000
57024     57024     shaanxi        107.6500       34.4500          102       151     2012      12        04        339              0.173500       1.278564       0.000000       0.256835   -9999.000000       0.070200       0.056300   -9999.000000
57024     57024     shaanxi        107.6500       34.4500          102       151     2012      12        05        340              0.173250       2.265381       0.000000       0.280666   -9999.000000   -9999.000000   -9999.000000       0.285000
57024     57024     shaanxi        107.6500       34.4500          102       151     2012      12        06        341              0.172750       1.834808       0.000000       0.267446       0.117000       0.086400   -9999.000000   -9999.000000
57024     57024     shaanxi        107.6500       34.4500          102       151     2012      12        07        342              0.173125       2.606384       0.000000       0.288601       0.113000   -9999.000000       0.047000       0.448000
57024     57024     shaanxi        107.6500       34.4500          102       151     2012      12        08        343              0.169750       2.768768       0.000000       0.281483       0.130000       0.172000       0.057900       0.241000
57024     57024     shaanxi        107.6500       34.4500          102       151     2012      12        09        344              0.166917       0.271606       0.000000       0.239257   -9999.000000       0.024400       0.050600       0.439000
57024     57024     shaanxi        107.6500       34.4500          102       151     2012      12        10        345              0.168125      -0.354980       0.000000       0.215928   -9999.000000   -9999.000000       0.056700       0.226000
57024     57024     shaanxi        107.6500       34.4500          102       151     2012      12        11        346              0.164083       0.569641       0.000000       0.235960       0.119000   -9999.000000   -9999.000000   -9999.000000
57024     57024     shaanxi        107.6500       34.4500          102       151     2012      12        12        347              0.161292      -0.625854       0.000000       0.213002       0.112000   -9999.000000       0.063100       0.081000
57024     57024     shaanxi        107.6500       34.4500          102       151     2012      12        13        348              0.165250      -0.759277       0.000000       0.198866   -9999.000000   -9999.000000       0.058800       0.233000
57024     57024     shaanxi        107.6500       34.4500          102       151     2012      12        14        349              0.167250      -1.434662       0.000000       0.180649       0.128000       0.034200       0.066800       0.374000
57024     57024     shaanxi        107.6500       34.4500          102       151     2012      12        15        350              0.000000      -0.031403       0.000000       0.218374   -9999.000000   -9999.000000       0.065000       0.242000
57024     57024     shaanxi        107.6500       34.4500          102       151     2012      12        16        351              0.166250      -1.027802       0.000000       0.188488   -9999.000000   -9999.000000   -9999.000000   -9999.000000
57024     57024     shaanxi        107.6500       34.4500          102       151     2012      12        17        352              0.167000      -0.625336       0.000000       0.196925   -9999.000000   -9999.000000   -9999.000000       0.212000
57024     57024     shaanxi        107.6500       34.4500          102       151     2012      12        18        353              0.163875      -0.749451       0.000000       0.208790       0.109000   -9999.000000       0.044600   -9999.000000
57024     57024     shaanxi        107.6500       34.4500          102       151     2012      12        19        354              0.163375      -0.987213       0.000000       0.205578   -9999.000000       0.095500       0.062200       0.214000
57024     57024     shaanxi        107.6500       34.4500          102       151     2012      12        20        355              0.000000      -0.900085       1.171166       0.195016   -9999.000000   -9999.000000       0.049400       0.159000
57024     57024     shaanxi        107.6500       34.4500          102       151     2012      12        21        356              0.164875      -2.315399       0.355937       0.173828   -9999.000000   -9999.000000       0.053300   -9999.000000
57024     57024     shaanxi        107.6500       34.4500          102       151     2012      12        22        357              0.160708      -1.989044       0.000000       0.182614   -9999.000000   -9999.000000   -9999.000000       0.116000
57024     57024     shaanxi        107.6500       34.4500          102       151     2012      12        23        358              0.120583      -4.233521       0.000000       0.164550   -9999.000000   -9999.000000       0.055800   -9999.000000
57024     57024     shaanxi        107.6500       34.4500          102       151     2012      12        24        359              0.096222      -5.212769       0.000000       0.152516       0.112000   -9999.000000       0.044400       0.098000
57024     57024     shaanxi        107.6500       34.4500          102       151     2012      12        25        360              0.095833      -3.831146       0.000000       0.167304   -9999.000000   -9999.000000       0.060600   -9999.000000
57024     57024     shaanxi        107.6500       34.4500          102       151     2012      12        26        361              0.000000      -3.346191       0.000000       0.167535   -9999.000000   -9999.000000       0.048500   -9999.000000
57024     57024     shaanxi        107.6500       34.4500          102       151     2012      12        27        362              0.087583      -4.663635       0.000000       0.155037   -9999.000000   -9999.000000       0.050800       0.065000
57024     57024     shaanxi        107.6500       34.4500          102       151     2012      12        28        363              0.000000      -3.973755       1.543284       0.163100   -9999.000000   -9999.000000   -9999.000000   -9999.000000
57024     57024     shaanxi        107.6500       34.4500          102       151     2012      12        29        364              0.000000      -3.757446       0.000000       0.160198   -9999.000000   -9999.000000       0.053200       0.090000
57024     57024     shaanxi        107.6500       34.4500          102       151     2012      12        30        365              0.000000      -6.769165       0.000000       0.148314       0.104000   -9999.000000       0.057100   -9999.000000
57024     57024     shaanxi        107.6500       34.4500          102       151     2012      12        31        366              0.093867      -3.994659       0.000000       0.169506   -9999.000000   -9999.000000       0.041900       0.219000
