# Supplementary material for: Research on Fusing Multisatellite Soil Moisture Data Based on Bayesian Model Averaging
Source: Hindawi journal article supplement (doi:10.1155/2018/9310838), 2018-06-25
Supplement: f1 [file 9310838.f1.zip › 2012_sm00-10cm_daily_ZDB_ZHY_57026_366days_allin.txt]

57026     57026     shaanxi        107.8833       34.3667          103       152     2012      01        01        001              0.000000   -9999.000000       0.000000   -9999.000000   -9999.000000   -9999.000000       0.073600   -9999.000000
57026     57026     shaanxi        107.8833       34.3667          103       152     2012      01        02        002              0.107417       0.334778       0.000000       0.224955       0.116000   -9999.000000   -9999.000000       0.177000
57026     57026     shaanxi        107.8833       34.3667          103       152     2012      01        03        003              0.000000       1.427063       0.000000       0.244974   -9999.000000   -9999.000000       0.081300   -9999.000000
57026     57026     shaanxi        107.8833       34.3667          103       152     2012      01        04        004              0.103000       0.275726       0.000000       0.231537   -9999.000000   -9999.000000       0.074500       0.068000
57026     57026     shaanxi        107.8833       34.3667          103       152     2012      01        05        005              0.094000      -1.206848       0.000000       0.206463   -9999.000000   -9999.000000       0.082100   -9999.000000
57026     57026     shaanxi        107.8833       34.3667          103       152     2012      01        06        006              0.092750      -1.333038       0.000000       0.197322   -9999.000000   -9999.000000       0.088200       0.204000
57026     57026     shaanxi        107.8833       34.3667          103       152     2012      01        07        007              0.100000      -0.028595       0.000000       0.218101   -9999.000000   -9999.000000   -9999.000000       0.024000
57026     57026     shaanxi        107.8833       34.3667          103       152     2012      01        08        008              0.000000      -0.177673       0.000000       0.216877   -9999.000000   -9999.000000   -9999.000000   -9999.000000
57026     57026     shaanxi        107.8833       34.3667          103       152     2012      01        09        009              0.101417       0.593170       0.000000       0.229959   -9999.000000   -9999.000000   -9999.000000       0.090000
57026     57026     shaanxi        107.8833       34.3667          103       152     2012      01        10        010              0.102042       1.119781       0.000000       0.238666   -9999.000000   -9999.000000       0.057600   -9999.000000
57026     57026     shaanxi        107.8833       34.3667          103       152     2012      01        11        011              0.099375       0.410706       0.000000       0.230902   -9999.000000   -9999.000000       0.057500       0.014000
57026     57026     shaanxi        107.8833       34.3667          103       152     2012      01        12        012              0.097167       0.315521       0.000000       0.226584   -9999.000000   -9999.000000       0.063000   -9999.000000
57026     57026     shaanxi        107.8833       34.3667          103       152     2012      01        13        013              0.101708       0.451721       0.000000       0.230174   -9999.000000   -9999.000000   -9999.000000   -9999.000000
57026     57026     shaanxi        107.8833       34.3667          103       152     2012      01        14        014              0.105174       0.771545       0.000000       0.241269   -9999.000000   -9999.000000       0.056400       0.072000
57026     57026     shaanxi        107.8833       34.3667          103       152     2012      01        15        015              0.102542       1.475281       0.000000       0.247920   -9999.000000   -9999.000000       0.046700   -9999.000000
57026     57026     shaanxi        107.8833       34.3667          103       152     2012      01        16        016              0.100667       0.870789       0.000000       0.237297   -9999.000000   -9999.000000       0.046000       0.053000
57026     57026     shaanxi        107.8833       34.3667          103       152     2012      01        17        017              0.000000       0.446686       0.135016       0.234175       0.114000   -9999.000000       0.047400   -9999.000000
57026     57026     shaanxi        107.8833       34.3667          103       152     2012      01        18        018              0.100958       1.505463       0.000000       0.252946   -9999.000000   -9999.000000       0.052300   -9999.000000
57026     57026     shaanxi        107.8833       34.3667          103       152     2012      01        19        019              0.101500       0.369263       0.000000       0.238446   -9999.000000   -9999.000000   -9999.000000       0.240000
57026     57026     shaanxi        107.8833       34.3667          103       152     2012      01        20        020              0.102958       0.732452       0.418072       0.246711   -9999.000000   -9999.000000       0.045500   -9999.000000
57026     57026     shaanxi        107.8833       34.3667          103       152     2012      01        21        021              0.103542       0.677948       3.638560       0.250535   -9999.000000   -9999.000000       0.045600       0.103000
57026     57026     shaanxi        107.8833       34.3667          103       152     2012      01        22        022              0.106958      -0.189423       0.703087       0.226642   -9999.000000   -9999.000000       0.044700   -9999.000000
57026     57026     shaanxi        107.8833       34.3667          103       152     2012      01        23        023              0.109208      -2.596130       0.415455       0.184785   -9999.000000       0.080200       0.039700       0.048000
57026     57026     shaanxi        107.8833       34.3667          103       152     2012      01        24        024              0.108333      -3.269165       0.358855       0.173154   -9999.000000   -9999.000000   -9999.000000       0.084000
57026     57026     shaanxi        107.8833       34.3667          103       152     2012      01        25        025              0.105292      -4.039642       1.162104       0.174082   -9999.000000   -9999.000000   -9999.000000       0.008000
57026     57026     shaanxi        107.8833       34.3667          103       152     2012      01        26        026              0.101500      -3.596741       0.251111       0.177744   -9999.000000   -9999.000000       0.019700       0.084000
57026     57026     shaanxi        107.8833       34.3667          103       152     2012      01        27        027              0.098250      -2.542450       0.183949       0.182995       0.099000   -9999.000000       0.027500   -9999.000000
57026     57026     shaanxi        107.8833       34.3667          103       152     2012      01        28        028              0.116333      -0.472351       0.000000       0.213739   -9999.000000       0.114500       0.034900       0.101000
57026     57026     shaanxi        107.8833       34.3667          103       152     2012      01        29        029              0.129417       0.979218       0.228253       0.238650   -9999.000000   -9999.000000       0.037000       0.211000
57026     57026     shaanxi        107.8833       34.3667          103       152     2012      01        30        030              0.136625       1.172546       0.642968       0.247208   -9999.000000   -9999.000000   -9999.000000       0.257000
57026     57026     shaanxi        107.8833       34.3667          103       152     2012      01        31        031              0.137583       1.462463       0.842289       0.249273   -9999.000000   -9999.000000       0.050900       0.328000
57026     57026     shaanxi        107.8833       34.3667          103       152     2012      02        01        032              0.137333       2.742950       0.307466       0.270685   -9999.000000   -9999.000000       0.037700   -9999.000000
57026     57026     shaanxi        107.8833       34.3667          103       152     2012      02        02        033              0.133125       2.034882       0.082279       0.262912   -9999.000000   -9999.000000       0.050000       0.103000
57026     57026     shaanxi        107.8833       34.3667          103       152     2012      02        03        034              0.127208       0.563080       9.106117       0.236137   -9999.000000   -9999.000000       0.065100   -9999.000000
57026     57026     shaanxi        107.8833       34.3667          103       152     2012      02        04        035              0.126417       1.667908       0.191445       0.251117   -9999.000000   -9999.000000       0.067800       0.425000
57026     57026     shaanxi        107.8833       34.3667          103       152     2012      02        05        036              0.125000       2.070679       0.101825       0.261037   -9999.000000   -9999.000000   -9999.000000       0.086000
57026     57026     shaanxi        107.8833       34.3667          103       152     2012      02        06        037              0.123417       3.250854       0.000000       0.279055       0.103000   -9999.000000       0.054000   -9999.000000
57026     57026     shaanxi        107.8833       34.3667          103       152     2012      02        07        038              0.117292       3.239838       0.000000       0.268697   -9999.000000   -9999.000000       0.056000       0.056000
57026     57026     shaanxi        107.8833       34.3667          103       152     2012      02        08        039              0.114833       0.500366       0.000000       0.233456   -9999.000000   -9999.000000       0.058100   -9999.000000
57026     57026     shaanxi        107.8833       34.3667          103       152     2012      02        09        040              0.112958       0.289825       0.000000       0.224977   -9999.000000   -9999.000000       0.062300       0.161000
57026     57026     shaanxi        107.8833       34.3667          103       152     2012      02        10        041              0.113917       0.645966       0.000000       0.232071   -9999.000000   -9999.000000   -9999.000000   -9999.000000
57026     57026     shaanxi        107.8833       34.3667          103       152     2012      02        11        042              0.111083       1.392212       0.000000       0.240180       0.098000   -9999.000000   -9999.000000   -9999.000000
57026     57026     shaanxi        107.8833       34.3667          103       152     2012      02        12        043              0.112167       2.045349       0.000000       0.248191   -9999.000000   -9999.000000   -9999.000000       0.193000
57026     57026     shaanxi        107.8833       34.3667          103       152     2012      02        13        044              0.111667       3.103302       0.000000       0.268803   -9999.000000   -9999.000000       0.055500   -9999.000000
57026     57026     shaanxi        107.8833       34.3667          103       152     2012      02        14        045              0.112000       2.803253       0.000000       0.270414   -9999.000000   -9999.000000   -9999.000000       0.196000
57026     57026     shaanxi        107.8833       34.3667          103       152     2012      02        15        046              0.111125       4.679993       0.041923       0.283459   -9999.000000   -9999.000000       0.074800   -9999.000000
57026     57026     shaanxi        107.8833       34.3667          103       152     2012      02        16        047              0.111292       3.275024       0.000000       0.285115       0.104000   -9999.000000   -9999.000000   -9999.000000
57026     57026     shaanxi        107.8833       34.3667          103       152     2012      02        17        048              0.110000       3.710510       0.000000       0.274982       0.110000   -9999.000000       0.065000       0.179000
57026     57026     shaanxi        107.8833       34.3667          103       152     2012      02        18        049              0.110208       2.246704       0.000000       0.261644       0.115000   -9999.000000       0.048800   -9999.000000
57026     57026     shaanxi        107.8833       34.3667          103       152     2012      02        19        050              0.110000       2.621552       0.000000       0.255569       0.113000   -9999.000000       0.065400       0.187000
57026     57026     shaanxi        107.8833       34.3667          103       152     2012      02        20        051              0.110208       3.820862       0.000000       0.268191   -9999.000000   -9999.000000       0.063300   -9999.000000
57026     57026     shaanxi        107.8833       34.3667          103       152     2012      02        21        052              0.109708       4.415009       0.000000       0.276414   -9999.000000   -9999.000000   -9999.000000       0.153000
57026     57026     shaanxi        107.8833       34.3667          103       152     2012      02        22        053              0.109833       5.093689       0.000000       0.280180       0.087000   -9999.000000   -9999.000000       0.285000
57026     57026     shaanxi        107.8833       34.3667          103       152     2012      02        23        054              0.108792       6.132233       0.000000       0.283813       0.099500   -9999.000000       0.057300   -9999.000000
57026     57026     shaanxi        107.8833       34.3667          103       152     2012      02        24        055              0.108833       4.354401       0.000000       0.283979       0.096000   -9999.000000       0.057100       0.131000
57026     57026     shaanxi        107.8833       34.3667          103       152     2012      02        25        056              0.107250       4.608978       0.000000       0.282001   -9999.000000   -9999.000000       0.064100   -9999.000000
57026     57026     shaanxi        107.8833       34.3667          103       152     2012      02        26        057              0.107167       2.500031       0.390159       0.273616   -9999.000000   -9999.000000       0.065300       0.075000
57026     57026     shaanxi        107.8833       34.3667          103       152     2012      02        27        058              0.106667       2.532074       0.167011       0.270422       0.091000   -9999.000000   -9999.000000       0.237000
57026     57026     shaanxi        107.8833       34.3667          103       152     2012      02        28        059              0.107000       2.123138       0.000000       0.262510       0.089000       0.067200   -9999.000000       0.267000
57026     57026     shaanxi        107.8833       34.3667          103       152     2012      02        29        060              0.000000   -9999.000000       0.417373   -9999.000000       0.098000   -9999.000000   -9999.000000   -9999.000000
57026     57026     shaanxi        107.8833       34.3667          103       152     2012      03        01        061              0.108167       2.903076       0.152302       0.275440   -9999.000000   -9999.000000       0.054700   -9999.000000
57026     57026     shaanxi        107.8833       34.3667          103       152     2012      03        02        062              0.108167       3.882782       0.000000       0.286143   -9999.000000   -9999.000000       0.055400       0.436000
57026     57026     shaanxi        107.8833       34.3667          103       152     2012      03        03        063              0.108292       3.184479       0.000000       0.285799   -9999.000000   -9999.000000       0.058000   -9999.000000
57026     57026     shaanxi        107.8833       34.3667          103       152     2012      03        04        064              0.108417       2.745331       0.000000       0.282547   -9999.000000   -9999.000000   -9999.000000       0.262000
57026     57026     shaanxi        107.8833       34.3667          103       152     2012      03        05        065              0.109583       2.605042       0.000000       0.280103       0.128000   -9999.000000       0.058400       0.025000
57026     57026     shaanxi        107.8833       34.3667          103       152     2012      03        06        066              0.109583       4.829193       0.000000       0.284341       0.119000   -9999.000000       0.047700   -9999.000000
57026     57026     shaanxi        107.8833       34.3667          103       152     2012      03        07        067              0.000000       5.135590       0.449687       0.282655   -9999.000000   -9999.000000       0.066600       0.188000
57026     57026     shaanxi        107.8833       34.3667          103       152     2012      03        08        068              0.110208       5.379883       0.413288       0.283181   -9999.000000   -9999.000000       0.074700   -9999.000000
57026     57026     shaanxi        107.8833       34.3667          103       152     2012      03        09        069              0.114875       4.087128       0.000000       0.287646       0.121000   -9999.000000       0.069000       0.240000
57026     57026     shaanxi        107.8833       34.3667          103       152     2012      03        10        070              0.115708       5.399078       0.324812       0.285760       0.123000   -9999.000000   -9999.000000   -9999.000000
57026     57026     shaanxi        107.8833       34.3667          103       152     2012      03        11        071              0.114333       9.120544       0.000000       0.282568       0.108000   -9999.000000       0.056000   -9999.000000
57026     57026     shaanxi        107.8833       34.3667          103       152     2012      03        12        072              0.113250       8.518219       0.000000       0.278522   -9999.000000   -9999.000000       0.070900       0.174000
57026     57026     shaanxi        107.8833       34.3667          103       152     2012      03        13        073              0.115958       8.336731       0.000000       0.276766       0.096000   -9999.000000       0.068200   -9999.000000
57026     57026     shaanxi        107.8833       34.3667          103       152     2012      03        14        074              0.118500      10.717316       0.000000       0.273534       0.099000   -9999.000000   -9999.000000       0.172000
57026     57026     shaanxi        107.8833       34.3667          103       152     2012      03        15        075              0.116625      10.951935       0.000000       0.272383       0.113000   -9999.000000   -9999.000000   -9999.000000
57026     57026     shaanxi        107.8833       34.3667          103       152     2012      03        16        076              0.118167       7.286713       0.000000       0.275986       0.099000   -9999.000000   -9999.000000   -9999.000000
57026     57026     shaanxi        107.8833       34.3667          103       152     2012      03        17        077              0.118708      11.255829       0.000000       0.273206   -9999.000000       0.118400       0.054600       0.267000
57026     57026     shaanxi        107.8833       34.3667          103       152     2012      03        18        078              0.118375      13.711700       0.977831       0.268583       0.099000   -9999.000000       0.073200   -9999.000000
57026     57026     shaanxi        107.8833       34.3667          103       152     2012      03        19        079              0.115750      14.283325       0.000000       0.263497       0.096500   -9999.000000       0.093700       0.074000
57026     57026     shaanxi        107.8833       34.3667          103       152     2012      03        20        080              0.114500       8.859772       0.000000       0.265190       0.095500   -9999.000000       0.102400   -9999.000000
57026     57026     shaanxi        107.8833       34.3667          103       152     2012      03        21        081              0.113417       7.972107       0.283102       0.267362       0.159000   -9999.000000   -9999.000000       0.078000
57026     57026     shaanxi        107.8833       34.3667          103       152     2012      03        22        082              0.113583       6.012177       0.287886       0.271815   -9999.000000   -9999.000000       0.094900       0.354000
57026     57026     shaanxi        107.8833       34.3667          103       152     2012      03        23        083              0.115458       6.983093       0.000000       0.272248   -9999.000000   -9999.000000       0.077200       0.310000
57026     57026     shaanxi        107.8833       34.3667          103       152     2012      03        24        084              0.115583       9.893555       0.000000       0.262990       0.123500   -9999.000000       0.092300       0.009000
57026     57026     shaanxi        107.8833       34.3667          103       152     2012      03        25        085              0.000000      12.401672       0.000000       0.256238       0.117500   -9999.000000       0.098900   -9999.000000
57026     57026     shaanxi        107.8833       34.3667          103       152     2012      03        26        086              0.115000      14.099548       0.000000       0.250559       0.124000   -9999.000000   -9999.000000       0.140000
57026     57026     shaanxi        107.8833       34.3667          103       152     2012      03        27        087              0.114125      15.295166       0.216835       0.245138       0.123000   -9999.000000   -9999.000000       0.211000
57026     57026     shaanxi        107.8833       34.3667          103       152     2012      03        28        088              0.112042      16.015656       0.662683       0.242848       0.151000   -9999.000000       0.132600       0.343000
57026     57026     shaanxi        107.8833       34.3667          103       152     2012      03        29        089              0.114000      11.971497       0.000000       0.254412       0.138000   -9999.000000       0.132900       0.027000
57026     57026     shaanxi        107.8833       34.3667          103       152     2012      03        30        090              0.112833      16.591309       1.258785       0.248166       0.124000   -9999.000000       0.120000   -9999.000000
57026     57026     shaanxi        107.8833       34.3667          103       152     2012      03        31        091              0.113000      14.069214       0.365479       0.241118       0.129000   -9999.000000       0.128600       0.012000
57026     57026     shaanxi        107.8833       34.3667          103       152     2012      04        01        092              0.111875      16.300476       0.000000       0.232546       0.157000   -9999.000000   -9999.000000   -9999.000000
57026     57026     shaanxi        107.8833       34.3667          103       152     2012      04        02        093              0.110417      17.769470       0.204242       0.228156       0.142000   -9999.000000       0.111900       0.187000
57026     57026     shaanxi        107.8833       34.3667          103       152     2012      04        03        094              0.110333      15.312683       0.000000       0.224430       0.135000   -9999.000000       0.085300       0.012000
57026     57026     shaanxi        107.8833       34.3667          103       152     2012      04        04        095              0.110500      15.806488       0.000000       0.219012       0.131000   -9999.000000       0.105400   -9999.000000
57026     57026     shaanxi        107.8833       34.3667          103       152     2012      04        05        096              0.108458      18.592529       0.000000       0.212278       0.137000   -9999.000000       0.106900       0.031000
57026     57026     shaanxi        107.8833       34.3667          103       152     2012      04        06        097              0.107292      16.984772       0.000000       0.208508       0.143000   -9999.000000       0.106200   -9999.000000
57026     57026     shaanxi        107.8833       34.3667          103       152     2012      04        07        098              0.106375      17.419769       0.000000       0.206264   -9999.000000   -9999.000000   -9999.000000       0.032000
57026     57026     shaanxi        107.8833       34.3667          103       152     2012      04        08        099              0.105542      18.959015       0.156296       0.201961       0.148000   -9999.000000       0.099100   -9999.000000
57026     57026     shaanxi        107.8833       34.3667          103       152     2012      04        09        100              0.103000      20.801666       0.090255       0.197435       0.149500       0.027500       0.140400   -9999.000000
57026     57026     shaanxi        107.8833       34.3667          103       152     2012      04        10        101              0.102750      18.290649       0.000000       0.199304       0.130000   -9999.000000       0.148000       0.149000
57026     57026     shaanxi        107.8833       34.3667          103       152     2012      04        11        102              0.101333      21.041229       3.657794       0.195807       0.180000   -9999.000000       0.154400   -9999.000000
57026     57026     shaanxi        107.8833       34.3667          103       152     2012      04        12        103              0.097542      19.187408       1.925212       0.203964   -9999.000000   -9999.000000   -9999.000000       0.169000
57026     57026     shaanxi        107.8833       34.3667          103       152     2012      04        13        104              0.099250      14.101776       0.000000       0.234399       0.185000   -9999.000000   -9999.000000   -9999.000000
57026     57026     shaanxi        107.8833       34.3667          103       152     2012      04        14        105              0.099042      17.821136       0.000000       0.217226       0.160000   -9999.000000       0.134700   -9999.000000
57026     57026     shaanxi        107.8833       34.3667          103       152     2012      04        15        106              0.098708      18.587585       0.000000       0.208365       0.150500   -9999.000000       0.149800       0.139000
57026     57026     shaanxi        107.8833       34.3667          103       152     2012      04        16        107              0.097000      21.072113       1.674685       0.198813       0.181000   -9999.000000       0.157900   -9999.000000
57026     57026     shaanxi        107.8833       34.3667          103       152     2012      04        17        108              0.093792      22.102020       0.000000       0.205662       0.181000   -9999.000000       0.173900       0.098000
57026     57026     shaanxi        107.8833       34.3667          103       152     2012      04        18        109              0.093458      18.472565       0.207512       0.212979       0.163000   -9999.000000   -9999.000000   -9999.000000
57026     57026     shaanxi        107.8833       34.3667          103       152     2012      04        19        110              0.089667      21.516510       2.064647       0.201130       0.185000   -9999.000000       0.172500       0.031000
57026     57026     shaanxi        107.8833       34.3667          103       152     2012      04        20        111              0.089417      17.831970       0.000000       0.218225       0.153000   -9999.000000       0.130400       0.034000
57026     57026     shaanxi        107.8833       34.3667          103       152     2012      04        21        112              0.088667      20.434814       0.393164       0.211219       0.223500   -9999.000000       0.169700       0.195000
57026     57026     shaanxi        107.8833       34.3667          103       152     2012      04        22        113              0.086542      22.980072       0.000000       0.194555       0.193000   -9999.000000   -9999.000000       0.074000
57026     57026     shaanxi        107.8833       34.3667          103       152     2012      04        23        114              0.098167      24.263824       0.920605       0.184816       0.215000   -9999.000000       0.178700   -9999.000000
57026     57026     shaanxi        107.8833       34.3667          103       152     2012      04        24        115              0.120750      22.029297       0.000000       0.188287       0.239000       0.260100   -9999.000000       0.229000
57026     57026     shaanxi        107.8833       34.3667          103       152     2012      04        25        116              0.000000      20.353058       0.000000       0.188933       0.191500   -9999.000000       0.174200       0.017000
57026     57026     shaanxi        107.8833       34.3667          103       152     2012      04        26        117              0.112417      21.054108       0.000000       0.178621       0.195000   -9999.000000       0.167200       0.130000
57026     57026     shaanxi        107.8833       34.3667          103       152     2012      04        27        118              0.109375      24.414307       0.000000       0.173600       0.206000       0.082400       0.171200       0.082000
57026     57026     shaanxi        107.8833       34.3667          103       152     2012      04        28        119              0.105917      26.441101       6.163574       0.171299   -9999.000000   -9999.000000       0.177800   -9999.000000
57026     57026     shaanxi        107.8833       34.3667          103       152     2012      04        29        120              0.103542      25.902466       0.000000       0.219990       0.215000   -9999.000000   -9999.000000       0.073000
57026     57026     shaanxi        107.8833       34.3667          103       152     2012      04        30        121              0.101750      24.374481       0.000000       0.227293       0.249000   -9999.000000   -9999.000000   -9999.000000
57026     57026     shaanxi        107.8833       34.3667          103       152     2012      05        01        122              0.106292      21.387970       0.000000       0.211466       0.259500   -9999.000000       0.173100       0.344000
57026     57026     shaanxi        107.8833       34.3667          103       152     2012      05        02        123              0.109625      20.003937       2.777282       0.206383   -9999.000000       0.185600       0.194300       0.481000
57026     57026     shaanxi        107.8833       34.3667          103       152     2012      05        03        124              0.115542      19.493500       1.911906       0.230401       0.236000   -9999.000000       0.182700   -9999.000000
57026     57026     shaanxi        107.8833       34.3667          103       152     2012      05        04        125              0.115917      20.691925       0.000000       0.228407       0.247000   -9999.000000       0.174500       0.302000
57026     57026     shaanxi        107.8833       34.3667          103       152     2012      05        05        126              0.113292      23.207153       0.000000       0.212147       0.204000   -9999.000000   -9999.000000   -9999.000000
57026     57026     shaanxi        107.8833       34.3667          103       152     2012      05        06        127              0.107167      25.889740       0.000000       0.193605       0.224500   -9999.000000       0.178700       0.092000
57026     57026     shaanxi        107.8833       34.3667          103       152     2012      05        07        128              0.103125      25.162476       0.299160       0.184195   -9999.000000       0.215300       0.129800   -9999.000000
57026     57026     shaanxi        107.8833       34.3667          103       152     2012      05        08        129              0.103000      25.206604       2.366770       0.181000       0.215000   -9999.000000       0.153300   -9999.000000
57026     57026     shaanxi        107.8833       34.3667          103       152     2012      05        09        130              0.100542      28.709259       3.078994       0.173415   -9999.000000   -9999.000000       0.151000       0.322000
57026     57026     shaanxi        107.8833       34.3667          103       152     2012      05        10        131              0.107917      27.326538      17.215368       0.171265   -9999.000000   -9999.000000       0.151700   -9999.000000
57026     57026     shaanxi        107.8833       34.3667          103       152     2012      05        11        132              0.144667      28.129913       0.610407       0.214845       0.268500   -9999.000000   -9999.000000       0.588000
57026     57026     shaanxi        107.8833       34.3667          103       152     2012      05        12        133              0.134417      22.240448       0.000000       0.292743       0.264000   -9999.000000       0.153200   -9999.000000
57026     57026     shaanxi        107.8833       34.3667          103       152     2012      05        13        134              0.129917      20.468018       0.826645       0.256516   -9999.000000   -9999.000000       0.163600   -9999.000000
57026     57026     shaanxi        107.8833       34.3667          103       152     2012      05        14        135              0.127708      18.491882       0.000000       0.248050   -9999.000000   -9999.000000       0.170100       0.347000
57026     57026     shaanxi        107.8833       34.3667          103       152     2012      05        15        136              0.121875      22.058105       0.000000       0.229565       0.244000   -9999.000000       0.172200   -9999.000000
57026     57026     shaanxi        107.8833       34.3667          103       152     2012      05        16        137              0.116333      23.275146       0.000000       0.210343       0.218000   -9999.000000   -9999.000000       0.386000
57026     57026     shaanxi        107.8833       34.3667          103       152     2012      05        17        138              0.112042      25.015228       0.530139       0.195234       0.217000   -9999.000000   -9999.000000   -9999.000000
57026     57026     shaanxi        107.8833       34.3667          103       152     2012      05        18        139              0.107333      25.703186       0.000000       0.185125       0.221000   -9999.000000       0.146800       0.284000
57026     57026     shaanxi        107.8833       34.3667          103       152     2012      05        19        140              0.102458      27.645538       0.382145       0.177986   -9999.000000   -9999.000000       0.169400       0.386000
57026     57026     shaanxi        107.8833       34.3667          103       152     2012      05        20        141              0.097583      29.024323       1.877912       0.175550   -9999.000000   -9999.000000       0.164000       0.474000
57026     57026     shaanxi        107.8833       34.3667          103       152     2012      05        21        142              0.138958      27.813049      23.648399       0.178054       0.340500   -9999.000000       0.207900       0.779000
57026     57026     shaanxi        107.8833       34.3667          103       152     2012      05        22        143              0.143875      19.937866       0.541936       0.332350       0.291500   -9999.000000   -9999.000000   -9999.000000
57026     57026     shaanxi        107.8833       34.3667          103       152     2012      05        23        144              0.137667      20.618958       0.000000       0.296215   -9999.000000   -9999.000000       0.188700       0.690000
57026     57026     shaanxi        107.8833       34.3667          103       152     2012      05        24        145              0.133792      19.993774       0.244624       0.279325       0.302000   -9999.000000       0.157700       0.459000
57026     57026     shaanxi        107.8833       34.3667          103       152     2012      05        25        146              0.000000      19.339386       0.000000       0.270008       0.281000       0.160400       0.175000       0.636000
57026     57026     shaanxi        107.8833       34.3667          103       152     2012      05        26        147              0.123583      22.368469       0.601470       0.255287       0.223000   -9999.000000       0.172300       0.474000
57026     57026     shaanxi        107.8833       34.3667          103       152     2012      05        27        148              0.116833      25.334747       0.000000       0.238299       0.235000   -9999.000000       0.160300   -9999.000000
57026     57026     shaanxi        107.8833       34.3667          103       152     2012      05        28        149              0.133208      26.934082      21.318573       0.224950       0.331000   -9999.000000   -9999.000000       0.867000
57026     57026     shaanxi        107.8833       34.3667          103       152     2012      05        29        150              0.144458      21.027893       0.000000       0.301984       0.270000   -9999.000000       0.170600   -9999.000000
57026     57026     shaanxi        107.8833       34.3667          103       152     2012      05        30        151              0.133625      23.475861       0.000000       0.298134       0.265000   -9999.000000       0.173400   -9999.000000
57026     57026     shaanxi        107.8833       34.3667          103       152     2012      05        31        152              0.126250      25.065186       0.000000       0.274294       0.267000   -9999.000000       0.169900   -9999.000000
57026     57026     shaanxi        107.8833       34.3667          103       152     2012      06        01        153              0.119833      22.996735       0.000000       0.267356       0.173500   -9999.000000       0.160900   -9999.000000
57026     57026     shaanxi        107.8833       34.3667          103       152     2012      06        02        154              0.112750      25.772736       0.863969       0.249317       0.194000       0.161800   -9999.000000       0.473000
57026     57026     shaanxi        107.8833       34.3667          103       152     2012      06        03        155              0.107458      25.987183       0.156636       0.235981       0.185000   -9999.000000   -9999.000000   -9999.000000
57026     57026     shaanxi        107.8833       34.3667          103       152     2012      06        04        156              0.103042      24.698883       0.000000       0.229940   -9999.000000   -9999.000000       0.108400       0.686000
57026     57026     shaanxi        107.8833       34.3667          103       152     2012      06        05        157              0.099875      26.544434       1.044963       0.218614       0.203000   -9999.000000       0.132400   -9999.000000
57026     57026     shaanxi        107.8833       34.3667          103       152     2012      06        06        158              0.096958      22.894287       0.000000       0.229128       0.176500   -9999.000000       0.127700   -9999.000000
57026     57026     shaanxi        107.8833       34.3667          103       152     2012      06        07        159              0.091875      26.037964       0.000000       0.216546       0.179500   -9999.000000       0.127700       0.489000
57026     57026     shaanxi        107.8833       34.3667          103       152     2012      06        08        160              0.086667      28.135529       0.000000       0.200737       0.209000   -9999.000000   -9999.000000   -9999.000000
57026     57026     shaanxi        107.8833       34.3667          103       152     2012      06        09        161              0.081250      26.577057       0.000000       0.191960   -9999.000000   -9999.000000       0.122400       0.507000
57026     57026     shaanxi        107.8833       34.3667          103       152     2012      06        10        162              0.075000      30.329102       1.317277       0.181352       0.177000   -9999.000000       0.107600   -9999.000000
57026     57026     shaanxi        107.8833       34.3667          103       152     2012      06        11        163              0.000000      30.961456       0.000000       0.184216       0.140000       0.275400       0.115100   -9999.000000
57026     57026     shaanxi        107.8833       34.3667          103       152     2012      06        12        164              0.065375      29.723358       0.000000       0.177855       0.153500   -9999.000000       0.117300       0.458000
57026     57026     shaanxi        107.8833       34.3667          103       152     2012      06        13        165              0.062667      31.591522       0.000000       0.171111       0.191000   -9999.000000       0.116300   -9999.000000
57026     57026     shaanxi        107.8833       34.3667          103       152     2012      06        14        166              0.058750      33.644226       0.232786       0.168348       0.181000   -9999.000000   -9999.000000       0.371000
57026     57026     shaanxi        107.8833       34.3667          103       152     2012      06        15        167              0.055583      30.812836       0.000000       0.167133       0.175000   -9999.000000       0.106900   -9999.000000
57026     57026     shaanxi        107.8833       34.3667          103       152     2012      06        16        168              0.053625      30.694519       0.000000       0.165726       0.178000   -9999.000000       0.119800       0.328000
57026     57026     shaanxi        107.8833       34.3667          103       152     2012      06        17        169              0.051875      31.863892       0.000000       0.164705       0.161500   -9999.000000       0.114000       0.567000
57026     57026     shaanxi        107.8833       34.3667          103       152     2012      06        18        170              0.050417      32.484772       0.000000       0.164160       0.178500   -9999.000000       0.093900       0.400000
57026     57026     shaanxi        107.8833       34.3667          103       152     2012      06        19        171              0.049167      32.291656       0.393302       0.163464       0.189000   -9999.000000   -9999.000000       0.488000
57026     57026     shaanxi        107.8833       34.3667          103       152     2012      06        20        172              0.116917      31.575287       0.000000       0.163325       0.174000   -9999.000000   -9999.000000   -9999.000000
57026     57026     shaanxi        107.8833       34.3667          103       152     2012      06        21        173              0.157542      33.217133       1.944375       0.162089       0.170000   -9999.000000       0.074200       0.554000
57026     57026     shaanxi        107.8833       34.3667          103       152     2012      06        22        174              0.157000      34.684937       0.545784       0.161003       0.142500   -9999.000000       0.090900       0.478000
57026     57026     shaanxi        107.8833       34.3667          103       152     2012      06        23        175              0.156000      35.026825       1.562801       0.160079       0.153000   -9999.000000       0.092800       0.427000
57026     57026     shaanxi        107.8833       34.3667          103       152     2012      06        24        176              0.154958      35.490143       0.865587       0.159242       0.155000   -9999.000000       0.095000       0.498000
57026     57026     shaanxi        107.8833       34.3667          103       152     2012      06        25        177              0.153667      33.231781       1.846821       0.161507   -9999.000000   -9999.000000   -9999.000000   -9999.000000
57026     57026     shaanxi        107.8833       34.3667          103       152     2012      06        26        178              0.153000      27.995972       0.771284       0.189167       0.176000   -9999.000000       0.092900       0.669000
57026     57026     shaanxi        107.8833       34.3667          103       152     2012      06        27        179              0.153625      26.789978       0.000000       0.183576       0.165000   -9999.000000       0.086800   -9999.000000
57026     57026     shaanxi        107.8833       34.3667          103       152     2012      06        28        180              0.153750      28.240936       3.376541       0.177661       0.179000   -9999.000000       0.098200       0.819000
57026     57026     shaanxi        107.8833       34.3667          103       152     2012      06        29        181              0.172667      26.540039      20.302605       0.189974       0.210000   -9999.000000       0.102200   -9999.000000
57026     57026     shaanxi        107.8833       34.3667          103       152     2012      06        30        182              0.183125      24.363556       0.000000       0.318297   -9999.000000       0.133200   -9999.000000   -9999.000000
57026     57026     shaanxi        107.8833       34.3667          103       152     2012      07        01        183              0.180875      27.402832       0.000000       0.269374       0.172000   -9999.000000   -9999.000000       0.632000
57026     57026     shaanxi        107.8833       34.3667          103       152     2012      07        02        184              0.226083      28.867340      21.625462       0.245878       0.212000   -9999.000000       0.094100   -9999.000000
57026     57026     shaanxi        107.8833       34.3667          103       152     2012      07        03        185              0.220917      24.118042       1.405393       0.334381       0.198000   -9999.000000       0.090700       0.653000
57026     57026     shaanxi        107.8833       34.3667          103       152     2012      07        04        186              0.211875      28.551727       2.693533       0.292617       0.206000   -9999.000000       0.102100   -9999.000000
57026     57026     shaanxi        107.8833       34.3667          103       152     2012      07        05        187              0.203708      26.167267       0.000000       0.295019       0.181000   -9999.000000       0.098200   -9999.000000
57026     57026     shaanxi        107.8833       34.3667          103       152     2012      07        06        188              0.194917      28.974548       0.418775       0.266530   -9999.000000   -9999.000000   -9999.000000       0.715000
57026     57026     shaanxi        107.8833       34.3667          103       152     2012      07        07        189              0.190750      29.203033       4.712532       0.253062   -9999.000000       0.072800       0.089100   -9999.000000
57026     57026     shaanxi        107.8833       34.3667          103       152     2012      07        08        190              0.283167      27.959320      47.625408       0.261457       0.217000   -9999.000000       0.094800       1.000000
57026     57026     shaanxi        107.8833       34.3667          103       152     2012      07        09        191              0.318708      25.323273       2.524647       0.379215       0.227500   -9999.000000       0.115300   -9999.000000
57026     57026     shaanxi        107.8833       34.3667          103       152     2012      07        10        192              0.309333      24.705414       0.211902       0.347872       0.180000   -9999.000000       0.108800   -9999.000000
57026     57026     shaanxi        107.8833       34.3667          103       152     2012      07        11        193              0.290750      29.177429       0.429448       0.321030   -9999.000000   -9999.000000       0.100500       0.716000
57026     57026     shaanxi        107.8833       34.3667          103       152     2012      07        12        194              0.270208      29.232819       0.000000       0.308445       0.210000   -9999.000000   -9999.000000   -9999.000000
57026     57026     shaanxi        107.8833       34.3667          103       152     2012      07        13        195              0.256522      29.961914       2.717866       0.294392       0.225000   -9999.000000       0.098300       0.756000
57026     57026     shaanxi        107.8833       34.3667          103       152     2012      07        14        196              0.249458      29.133331       0.332049       0.293824       0.199500   -9999.000000       0.091400   -9999.000000
57026     57026     shaanxi        107.8833       34.3667          103       152     2012      07        15        197              0.241208      28.248260       0.000000       0.283275       0.220000   -9999.000000       0.100600       0.550000
57026     57026     shaanxi        107.8833       34.3667          103       152     2012      07        16        198              0.233667      28.561127       0.000000       0.273909       0.264000   -9999.000000       0.113400       0.622000
57026     57026     shaanxi        107.8833       34.3667          103       152     2012      07        17        199              0.227583      28.294708       0.000000       0.266123       0.208000   -9999.000000   -9999.000000       0.507000
57026     57026     shaanxi        107.8833       34.3667          103       152     2012      07        18        200              0.222583      27.721985       0.000000       0.257973       0.203000       0.073400   -9999.000000       0.562000
57026     57026     shaanxi        107.8833       34.3667          103       152     2012      07        19        201              0.218000      28.475372       0.000000       0.250136       0.197000   -9999.000000       0.089400   -9999.000000
57026     57026     shaanxi        107.8833       34.3667          103       152     2012      07        20        202              0.214130      29.186371       0.250330       0.241979       0.230000   -9999.000000       0.096600       0.642000
57026     57026     shaanxi        107.8833       34.3667          103       152     2012      07        21        203              0.219174      29.542816      13.684062       0.236494   -9999.000000   -9999.000000       0.114600       1.000000
57026     57026     shaanxi        107.8833       34.3667          103       152     2012      07        22        204              0.230042      25.595154       2.267677       0.309656       0.242000       0.194800       0.111800       0.755000
57026     57026     shaanxi        107.8833       34.3667          103       152     2012      07        23        205              0.228783      28.307770       3.652215       0.285443       0.243000   -9999.000000   -9999.000000       0.862000
57026     57026     shaanxi        107.8833       34.3667          103       152     2012      07        24        206              0.230542      25.450287       0.000000       0.291810       0.225000   -9999.000000       0.116700   -9999.000000
57026     57026     shaanxi        107.8833       34.3667          103       152     2012      07        25        207              0.227167      27.800537       0.000000       0.280316       0.213000   -9999.000000       0.091800       0.688000
57026     57026     shaanxi        107.8833       34.3667          103       152     2012      07        26        208              0.223417      29.059509       0.000000       0.267490       0.228000   -9999.000000       0.108300   -9999.000000
57026     57026     shaanxi        107.8833       34.3667          103       152     2012      07        27        209              0.217083      31.202515       0.000000       0.251138   -9999.000000   -9999.000000       0.106300       0.633000
57026     57026     shaanxi        107.8833       34.3667          103       152     2012      07        28        210              0.211083      32.083801       0.000000       0.233403       0.208000   -9999.000000       0.104600       0.485000
57026     57026     shaanxi        107.8833       34.3667          103       152     2012      07        29        211              0.205583      33.169159       0.000000       0.217036       0.201000   -9999.000000   -9999.000000   -9999.000000
57026     57026     shaanxi        107.8833       34.3667          103       152     2012      07        30        212              0.199750      34.583527       0.445289       0.203854       0.221000   -9999.000000       0.098400       0.568000
57026     57026     shaanxi        107.8833       34.3667          103       152     2012      07        31        213              0.195500      31.588135       0.000000       0.198660       0.237000   -9999.000000       0.098800   -9999.000000
57026     57026     shaanxi        107.8833       34.3667          103       152     2012      08        01        214              0.192167      29.537018       0.206616       0.195694       0.236000   -9999.000000       0.100700       0.631000
57026     57026     shaanxi        107.8833       34.3667          103       152     2012      08        02        215              0.190958      28.205750       0.592275       0.191950       0.246000       0.166000       0.103000   -9999.000000
57026     57026     shaanxi        107.8833       34.3667          103       152     2012      08        03        216              0.190125      30.875702       0.857710       0.188539       0.235000   -9999.000000   -9999.000000   -9999.000000
57026     57026     shaanxi        107.8833       34.3667          103       152     2012      08        04        217              0.189000      30.846344       0.000000       0.196425       0.216000   -9999.000000   -9999.000000       0.612000
57026     57026     shaanxi        107.8833       34.3667          103       152     2012      08        05        218              0.187583      30.928375       1.967119       0.185969       0.246000   -9999.000000       0.099800   -9999.000000
57026     57026     shaanxi        107.8833       34.3667          103       152     2012      08        06        219              0.186458      30.020020       6.707901       0.192992       0.256000   -9999.000000       0.108400       0.624000
57026     57026     shaanxi        107.8833       34.3667          103       152     2012      08        07        220              0.185708      29.623230       0.000000       0.198621   -9999.000000   -9999.000000       0.094500   -9999.000000
57026     57026     shaanxi        107.8833       34.3667          103       152     2012      08        08        221              0.184292      31.932007       1.435026       0.185629       0.255000   -9999.000000       0.103300   -9999.000000
57026     57026     shaanxi        107.8833       34.3667          103       152     2012      08        09        222              0.182292      31.865967       0.000000       0.188658       0.227000   -9999.000000   -9999.000000       0.692000
57026     57026     shaanxi        107.8833       34.3667          103       152     2012      08        10        223              0.179417      32.478516       0.000000       0.178513       0.224500       0.107500   -9999.000000   -9999.000000
57026     57026     shaanxi        107.8833       34.3667          103       152     2012      08        11        224              0.178333      30.949158       0.229001       0.172538       0.276000   -9999.000000       0.087900       0.644000
57026     57026     shaanxi        107.8833       34.3667          103       152     2012      08        12        225              0.176917      32.943390      11.055844       0.168201       0.246000   -9999.000000       0.108600   -9999.000000
57026     57026     shaanxi        107.8833       34.3667          103       152     2012      08        13        226              0.197542      31.707367      30.133924       0.206924       0.349000       0.134100       0.103800       1.000000
57026     57026     shaanxi        107.8833       34.3667          103       152     2012      08        14        227              0.230583      25.470398       5.330785       0.346762       0.346000   -9999.000000       0.096100       0.981000
57026     57026     shaanxi        107.8833       34.3667          103       152     2012      08        15        228              0.229333      25.409485       0.514118       0.328409       0.302000   -9999.000000   -9999.000000       0.850000
57026     57026     shaanxi        107.8833       34.3667          103       152     2012      08        16        229              0.223792      27.141022       0.000000       0.303260       0.319500   -9999.000000       0.089100       0.702000
57026     57026     shaanxi        107.8833       34.3667          103       152     2012      08        17        230              0.226417      28.021881      16.239904       0.289142       0.286000       0.184400       0.101300   -9999.000000
57026     57026     shaanxi        107.8833       34.3667          103       152     2012      08        18        231              0.254833      26.238953       2.664746       0.312288   -9999.000000       0.172200       0.092000       0.882000
57026     57026     shaanxi        107.8833       34.3667          103       152     2012      08        19        232              0.271833      23.838745      15.724652       0.331379       0.336000   -9999.000000       0.097000       0.922000
57026     57026     shaanxi        107.8833       34.3667          103       152     2012      08        20        233              0.268750      23.202545       0.460817       0.352937       0.324000   -9999.000000   -9999.000000       0.888000
57026     57026     shaanxi        107.8833       34.3667          103       152     2012      08        21        234              0.263625      23.536957       0.000000       0.328850       0.274500   -9999.000000   -9999.000000   -9999.000000
57026     57026     shaanxi        107.8833       34.3667          103       152     2012      08        22        235              0.255792      25.479980       0.000000       0.314124       0.252000   -9999.000000       0.093300   -9999.000000
57026     57026     shaanxi        107.8833       34.3667          103       152     2012      08        23        236              0.243500      25.548615       0.000000       0.301069   -9999.000000       0.168900       0.114300       0.725000
57026     57026     shaanxi        107.8833       34.3667          103       152     2012      08        24        237              0.232042      25.709991       0.000000       0.291091   -9999.000000   -9999.000000       0.106800   -9999.000000
57026     57026     shaanxi        107.8833       34.3667          103       152     2012      08        25        238              0.000000      25.789764       2.372503       0.281751       0.256000   -9999.000000       0.108900       0.701000
57026     57026     shaanxi        107.8833       34.3667          103       152     2012      08        26        239              0.217750      26.630951       0.000000       0.284402       0.245500   -9999.000000   -9999.000000       0.629000
57026     57026     shaanxi        107.8833       34.3667          103       152     2012      08        27        240              0.213292      26.373016       7.353683       0.280895       0.250000   -9999.000000       0.136300   -9999.000000
57026     57026     shaanxi        107.8833       34.3667          103       152     2012      08        28        241              0.213000      25.984100       0.000000       0.298479       0.199000       0.211900       0.112300       0.728000
57026     57026     shaanxi        107.8833       34.3667          103       152     2012      08        29        242              0.208708      26.939178       0.000000       0.290850       0.270000   -9999.000000       0.127000   -9999.000000
57026     57026     shaanxi        107.8833       34.3667          103       152     2012      08        30        243              0.204542      27.797333      19.119507       0.273303   -9999.000000   -9999.000000       0.130700       0.656000
57026     57026     shaanxi        107.8833       34.3667          103       152     2012      08        31        244              0.283958      27.041351      39.760147       0.294261   -9999.000000       0.123200   -9999.000000   -9999.000000
57026     57026     shaanxi        107.8833       34.3667          103       152     2012      09        01        245              0.308625      22.988831      27.206835       0.384894       0.262000   -9999.000000   -9999.000000   -9999.000000
57026     57026     shaanxi        107.8833       34.3667          103       152     2012      09        02        246              0.292583      20.509949       0.000000       0.386534       0.219000       0.131400       0.141300       0.774000
57026     57026     shaanxi        107.8833       34.3667          103       152     2012      09        03        247              0.282083      23.035980      22.055124       0.354383   -9999.000000   -9999.000000       0.140400   -9999.000000
57026     57026     shaanxi        107.8833       34.3667          103       152     2012      09        04        248              0.272167      24.137817       0.000000       0.341552       0.240000   -9999.000000       0.110200       0.712000
57026     57026     shaanxi        107.8833       34.3667          103       152     2012      09        05        249              0.263042      24.535797       0.000000       0.332705       0.209500       0.127100       0.129200   -9999.000000
57026     57026     shaanxi        107.8833       34.3667          103       152     2012      09        06        250              0.254083      25.820618       0.000000       0.326198       0.217000   -9999.000000   -9999.000000   -9999.000000
57026     57026     shaanxi        107.8833       34.3667          103       152     2012      09        07        251              0.287750      25.652740      50.812119       0.321135   -9999.000000       0.126600       0.165300       1.000000
57026     57026     shaanxi        107.8833       34.3667          103       152     2012      09        08        252              0.318000      22.727783       8.157003       0.374708       0.309000   -9999.000000       0.130400   -9999.000000
57026     57026     shaanxi        107.8833       34.3667          103       152     2012      09        09        253              0.306167      22.490143       0.630118       0.378682       0.271000   -9999.000000       0.139200       0.926000
57026     57026     shaanxi        107.8833       34.3667          103       152     2012      09        10        254              0.326708      23.018402      20.655693       0.361134       0.307000       0.165200       0.132200   -9999.000000
57026     57026     shaanxi        107.8833       34.3667          103       152     2012      09        11        255              0.312792      21.144623       4.979242       0.381816       0.227000   -9999.000000       0.125100       0.996000
57026     57026     shaanxi        107.8833       34.3667          103       152     2012      09        12        256              0.302417      23.091217       0.000000       0.359589       0.237000   -9999.000000   -9999.000000       0.740000
57026     57026     shaanxi        107.8833       34.3667          103       152     2012      09        13        257              0.298917      20.094482       0.000000       0.351633       0.196000   -9999.000000       0.108800       0.755000
57026     57026     shaanxi        107.8833       34.3667          103       152     2012      09        14        258              0.295708      20.278259       0.000000       0.345596   -9999.000000   -9999.000000       0.102400       0.586000
57026     57026     shaanxi        107.8833       34.3667          103       152     2012      09        15        259              0.289292      20.957733       1.088202       0.341191       0.264000       0.115800       0.125800   -9999.000000
57026     57026     shaanxi        107.8833       34.3667          103       152     2012      09        16        260              0.285292      20.407745       0.463439       0.341473       0.232000   -9999.000000       0.121400       0.908000
57026     57026     shaanxi        107.8833       34.3667          103       152     2012      09        17        261              0.281542      19.114960       0.000000       0.341475       0.223000   -9999.000000   -9999.000000       0.672000
57026     57026     shaanxi        107.8833       34.3667          103       152     2012      09        18        262              0.272917      21.362610       0.000000       0.336513       0.206000   -9999.000000   -9999.000000       0.690000
57026     57026     shaanxi        107.8833       34.3667          103       152     2012      09        19        263              0.263208      22.396912       0.000000       0.332388   -9999.000000   -9999.000000       0.107100       0.679000
57026     57026     shaanxi        107.8833       34.3667          103       152     2012      09        20        264              0.258000      22.972809       1.641243       0.328393       0.246000       0.092800       0.130200   -9999.000000
57026     57026     shaanxi        107.8833       34.3667          103       152     2012      09        21        265              0.256583      20.771393       0.000000       0.332373   -9999.000000   -9999.000000       0.110500       0.699000
57026     57026     shaanxi        107.8833       34.3667          103       152     2012      09        22        266              0.250917      22.524475       0.000000       0.328757       0.164500   -9999.000000       0.121400   -9999.000000
57026     57026     shaanxi        107.8833       34.3667          103       152     2012      09        23        267              0.246500      21.944763       0.000000       0.327086       0.173000       0.069900   -9999.000000       0.685000
57026     57026     shaanxi        107.8833       34.3667          103       152     2012      09        24        268              0.241208      22.457947       6.470377       0.325550       0.172000   -9999.000000       0.153200       0.693000
57026     57026     shaanxi        107.8833       34.3667          103       152     2012      09        25        269              0.303542      22.452484       9.175968       0.330802       0.201000       0.246300       0.124200   -9999.000000
57026     57026     shaanxi        107.8833       34.3667          103       152     2012      09        26        270              0.295208      19.152466       0.000000       0.357839       0.206000   -9999.000000       0.145300       0.778000
57026     57026     shaanxi        107.8833       34.3667          103       152     2012      09        27        271              0.286857      20.919830       0.000000       0.340432       0.164000   -9999.000000       0.129100   -9999.000000
57026     57026     shaanxi        107.8833       34.3667          103       152     2012      09        28        272              0.263333      20.772522       0.000000       0.333839       0.162000   -9999.000000       0.125800       0.637000
57026     57026     shaanxi        107.8833       34.3667          103       152     2012      09        29        273              0.254292      18.570831       2.206897       0.328053       0.166000   -9999.000000   -9999.000000   -9999.000000
57026     57026     shaanxi        107.8833       34.3667          103       152     2012      09        30        274              0.243958      19.254486       0.000000       0.326442   -9999.000000   -9999.000000       0.120100   -9999.000000
57026     57026     shaanxi        107.8833       34.3667          103       152     2012      10        01        275              0.235042      19.722839       0.000000       0.322922       0.144000   -9999.000000       0.099400       0.630000
57026     57026     shaanxi        107.8833       34.3667          103       152     2012      10        02        276              0.266625      20.162628      13.597243       0.320113       0.172000   -9999.000000       0.104700   -9999.000000
57026     57026     shaanxi        107.8833       34.3667          103       152     2012      10        03        277              0.284667      18.199707       0.404212       0.349428       0.154500       0.187000       0.107200       0.706000
57026     57026     shaanxi        107.8833       34.3667          103       152     2012      10        04        278              0.273833      20.771240       2.491766       0.339751       0.176000   -9999.000000   -9999.000000   -9999.000000
57026     57026     shaanxi        107.8833       34.3667          103       152     2012      10        05        279              0.266417      18.311005       0.000000       0.336128       0.156000   -9999.000000   -9999.000000   -9999.000000
57026     57026     shaanxi        107.8833       34.3667          103       152     2012      10        06        280              0.258875      19.649170       0.000000       0.331048       0.152000       0.115100       0.084400       0.775000
57026     57026     shaanxi        107.8833       34.3667          103       152     2012      10        07        281              0.255125      17.920013       0.000000       0.328756       0.159000   -9999.000000       0.106200   -9999.000000
57026     57026     shaanxi        107.8833       34.3667          103       152     2012      10        08        282              0.255000      17.910736       3.107746       0.327786       0.189000       0.037500       0.082700       0.896000
57026     57026     shaanxi        107.8833       34.3667          103       152     2012      10        09        283              0.255250      17.117065       0.000000       0.335529       0.160000   -9999.000000       0.078100   -9999.000000
57026     57026     shaanxi        107.8833       34.3667          103       152     2012      10        10        284              0.250875      18.427887       0.000000       0.328228       0.162000   -9999.000000   -9999.000000       0.626000
57026     57026     shaanxi        107.8833       34.3667          103       152     2012      10        11        285              0.248417      18.582031       0.154056       0.324480   -9999.000000       0.139600       0.075900       0.715000
57026     57026     shaanxi        107.8833       34.3667          103       152     2012      10        12        286              0.246958      16.989349       0.000000       0.324810       0.129000   -9999.000000       0.061200       0.609000
57026     57026     shaanxi        107.8833       34.3667          103       152     2012      10        13        287              0.242500      18.050446       0.000000       0.323843       0.106500   -9999.000000       0.075400       0.585000
57026     57026     shaanxi        107.8833       34.3667          103       152     2012      10        14        288              0.236792      19.339111       0.000000       0.320590       0.117500   -9999.000000       0.077500   -9999.000000
57026     57026     shaanxi        107.8833       34.3667          103       152     2012      10        15        289              0.233667      18.286072       2.046781       0.319574       0.131000   -9999.000000       0.077500       0.498000
57026     57026     shaanxi        107.8833       34.3667          103       152     2012      10        16        290              0.229125      16.665405       0.000000       0.323134   -9999.000000       0.101000   -9999.000000       0.622000
57026     57026     shaanxi        107.8833       34.3667          103       152     2012      10        17        291              0.222875      15.250916       0.233936       0.321212       0.120000   -9999.000000       0.072200       0.554000
57026     57026     shaanxi        107.8833       34.3667          103       152     2012      10        18        292              0.219208      14.880188       0.000000       0.317255       0.126000   -9999.000000       0.075100       0.507000
57026     57026     shaanxi        107.8833       34.3667          103       152     2012      10        19        293              0.216417      13.229095       0.000000       0.317782       0.117000   -9999.000000       0.071100   -9999.000000
57026     57026     shaanxi        107.8833       34.3667          103       152     2012      10        20        294              0.213125      15.667175       0.000000       0.315993       0.127000   -9999.000000       0.075000       0.617000
57026     57026     shaanxi        107.8833       34.3667          103       152     2012      10        21        295              0.210583      16.971344       0.743569       0.314297       0.161000       0.050600   -9999.000000   -9999.000000
57026     57026     shaanxi        107.8833       34.3667          103       152     2012      10        22        296              0.206083      13.212524       0.000000       0.314939   -9999.000000   -9999.000000   -9999.000000       0.614000
57026     57026     shaanxi        107.8833       34.3667          103       152     2012      10        23        297              0.204667      13.927887       1.880900       0.312284   -9999.000000   -9999.000000       0.067400       0.624000
57026     57026     shaanxi        107.8833       34.3667          103       152     2012      10        24        298              0.204750      11.011322       0.000000       0.319819   -9999.000000       0.240200       0.082300   -9999.000000
57026     57026     shaanxi        107.8833       34.3667          103       152     2012      10        25        299              0.000000      13.987061       0.000000       0.315224       0.147500   -9999.000000       0.076200       0.474000
57026     57026     shaanxi        107.8833       34.3667          103       152     2012      10        26        300              0.200250      14.750397       0.000000       0.312911       0.153000       0.088800       0.078300   -9999.000000
57026     57026     shaanxi        107.8833       34.3667          103       152     2012      10        27        301              0.197167      16.169220       0.000000       0.311031   -9999.000000   -9999.000000   -9999.000000       0.554000
57026     57026     shaanxi        107.8833       34.3667          103       152     2012      10        28        302              0.000000      15.122589       0.735355       0.309693       0.160000   -9999.000000       0.080400   -9999.000000
57026     57026     shaanxi        107.8833       34.3667          103       152     2012      10        29        303              0.196792      14.685150       0.762458       0.310607       0.149500       0.101000       0.077400   -9999.000000
57026     57026     shaanxi        107.8833       34.3667          103       152     2012      10        30        304              0.194708      14.540771       0.000000       0.315026       0.138000   -9999.000000       0.087900       0.512000
57026     57026     shaanxi        107.8833       34.3667          103       152     2012      10        31        305              0.193167      12.979401       0.000000       0.309877       0.152000       0.169900       0.084200   -9999.000000
57026     57026     shaanxi        107.8833       34.3667          103       152     2012      11        01        306              0.192417      12.575165       0.000000       0.307465       0.136000   -9999.000000   -9999.000000       0.462000
57026     57026     shaanxi        107.8833       34.3667          103       152     2012      11        02        307              0.192000      11.876129       0.229485       0.306736       0.137000   -9999.000000   -9999.000000   -9999.000000
57026     57026     shaanxi        107.8833       34.3667          103       152     2012      11        03        308              0.189667      12.796051       0.000000       0.305147   -9999.000000       0.010900       0.072600   -9999.000000
57026     57026     shaanxi        107.8833       34.3667          103       152     2012      11        04        309              0.187917       8.963379       0.000000       0.302521       0.130000   -9999.000000       0.086100       0.469000
57026     57026     shaanxi        107.8833       34.3667          103       152     2012      11        05        310              0.187000       8.121735       0.000000       0.301982       0.142000   -9999.000000       0.082800   -9999.000000
57026     57026     shaanxi        107.8833       34.3667          103       152     2012      11        06        311              0.186708       7.946594       0.270038       0.301318       0.148000   -9999.000000       0.091100       0.467000
57026     57026     shaanxi        107.8833       34.3667          103       152     2012      11        07        312              0.187792       9.300354       3.118323       0.302444   -9999.000000   -9999.000000   -9999.000000   -9999.000000
57026     57026     shaanxi        107.8833       34.3667          103       152     2012      11        08        313              0.189792       7.736755       0.120343       0.317940   -9999.000000       0.200000       0.097500       0.576000
57026     57026     shaanxi        107.8833       34.3667          103       152     2012      11        09        314              0.191125       9.548950       1.615831       0.309860       0.158000   -9999.000000       0.077500       0.614000
57026     57026     shaanxi        107.8833       34.3667          103       152     2012      11        10        315              0.191667       8.471741       0.138690       0.313154       0.140000   -9999.000000       0.088000       0.605000
57026     57026     shaanxi        107.8833       34.3667          103       152     2012      11        11        316              0.191000       6.719482       0.000000       0.312259       0.146000   -9999.000000       0.088100       0.320000
57026     57026     shaanxi        107.8833       34.3667          103       152     2012      11        12        317              0.191375       7.019012       0.000000       0.308456   -9999.000000   -9999.000000       0.079800   -9999.000000
57026     57026     shaanxi        107.8833       34.3667          103       152     2012      11        13        318              0.000000       8.481018       0.000000       0.307213   -9999.000000       0.053500   -9999.000000       0.360000
57026     57026     shaanxi        107.8833       34.3667          103       152     2012      11        14        319              0.190167       8.339264       0.000000       0.305504       0.142000   -9999.000000       0.077000       0.514000
57026     57026     shaanxi        107.8833       34.3667          103       152     2012      11        15        320              0.190333       7.774658       0.385954       0.304834       0.158000       0.088800       0.069600       0.411000
57026     57026     shaanxi        107.8833       34.3667          103       152     2012      11        16        321              0.190000       6.203430       0.000000       0.307621       0.153000       0.075300       0.072300       0.301000
57026     57026     shaanxi        107.8833       34.3667          103       152     2012      11        17        322              0.000000       7.955780       0.000000       0.305660       0.139000   -9999.000000       0.079500   -9999.000000
57026     57026     shaanxi        107.8833       34.3667          103       152     2012      11        18        323              0.188417       7.844574       0.000000       0.304119   -9999.000000       0.066000   -9999.000000       0.327000
57026     57026     shaanxi        107.8833       34.3667          103       152     2012      11        19        324              0.187917       8.780975       0.000000       0.302863       0.151000   -9999.000000   -9999.000000   -9999.000000
57026     57026     shaanxi        107.8833       34.3667          103       152     2012      11        20        325              0.188000       8.044861       0.000000       0.302736       0.142000   -9999.000000       0.079400       0.420000
57026     57026     shaanxi        107.8833       34.3667          103       152     2012      11        21        326              0.188125       7.205597       0.000000       0.303468       0.134000       0.091200       0.091300       0.300000
57026     57026     shaanxi        107.8833       34.3667          103       152     2012      11        22        327              0.187042       8.950470       0.000000       0.302802       0.145000   -9999.000000       0.082500   -9999.000000
57026     57026     shaanxi        107.8833       34.3667          103       152     2012      11        23        328              0.185542       7.251099       0.000000       0.301292   -9999.000000   -9999.000000       0.091500       0.306000
57026     57026     shaanxi        107.8833       34.3667          103       152     2012      11        24        329              0.184792       6.081146       2.424176       0.299896   -9999.000000   -9999.000000   -9999.000000   -9999.000000
57026     57026     shaanxi        107.8833       34.3667          103       152     2012      11        25        330              0.186583       5.384888       0.506863       0.304086   -9999.000000   -9999.000000       0.095800       0.499000
57026     57026     shaanxi        107.8833       34.3667          103       152     2012      11        26        331              0.187833       4.611145       0.000000       0.308550       0.128000       0.192100   -9999.000000   -9999.000000
57026     57026     shaanxi        107.8833       34.3667          103       152     2012      11        27        332              0.188667       4.506439       0.000000       0.300828       0.151000   -9999.000000       0.086000   -9999.000000
57026     57026     shaanxi        107.8833       34.3667          103       152     2012      11        28        333              0.189083       5.474670       0.000000       0.302421       0.134000   -9999.000000       0.089600       0.283000
57026     57026     shaanxi        107.8833       34.3667          103       152     2012      11        29        334              0.189083       3.419373       0.000000       0.292902   -9999.000000   -9999.000000       0.089400   -9999.000000
57026     57026     shaanxi        107.8833       34.3667          103       152     2012      11        30        335              0.189625       2.129761       0.092741       0.277713   -9999.000000   -9999.000000   -9999.000000       0.343000
57026     57026     shaanxi        107.8833       34.3667          103       152     2012      12        01        336              0.190250       2.417755       0.000000       0.290832       0.130000   -9999.000000       0.082400   -9999.000000
57026     57026     shaanxi        107.8833       34.3667          103       152     2012      12        02        337              0.190208       3.151489       0.000000       0.298793   -9999.000000   -9999.000000       0.087200       0.222000
57026     57026     shaanxi        107.8833       34.3667          103       152     2012      12        03        338              0.190000       2.547363       0.000000       0.296051       0.143000   -9999.000000       0.081300       0.379000
57026     57026     shaanxi        107.8833       34.3667          103       152     2012      12        04        339              0.190042       3.705353       0.000000       0.289067   -9999.000000       0.192700       0.088500   -9999.000000
57026     57026     shaanxi        107.8833       34.3667          103       152     2012      12        05        340              0.189667       4.676941       0.000000       0.295957   -9999.000000   -9999.000000   -9999.000000       0.242000
57026     57026     shaanxi        107.8833       34.3667          103       152     2012      12        06        341              0.189583       4.231262       0.000000       0.291178       0.132000       0.188700   -9999.000000   -9999.000000
57026     57026     shaanxi        107.8833       34.3667          103       152     2012      12        07        342              0.189292       4.823425       0.000000       0.295325       0.123000   -9999.000000       0.056100       0.293000
57026     57026     shaanxi        107.8833       34.3667          103       152     2012      12        08        343              0.188417       4.928680       0.000000       0.294924       0.138000   -9999.000000       0.083200       0.272000
57026     57026     shaanxi        107.8833       34.3667          103       152     2012      12        09        344              0.187875       2.704956       0.000000       0.272049   -9999.000000       0.104700       0.083400       0.304000
57026     57026     shaanxi        107.8833       34.3667          103       152     2012      12        10        345              0.188250       1.761597       0.000000       0.268897   -9999.000000   -9999.000000       0.081600       0.165000
57026     57026     shaanxi        107.8833       34.3667          103       152     2012      12        11        346              0.187542       2.581299       0.000000       0.270560   -9999.000000   -9999.000000   -9999.000000   -9999.000000
57026     57026     shaanxi        107.8833       34.3667          103       152     2012      12        12        347              0.187167       1.129089       0.000000       0.250769   -9999.000000   -9999.000000       0.084800       0.131000
57026     57026     shaanxi        107.8833       34.3667          103       152     2012      12        13        348              0.187750       0.859802       0.000000       0.246207   -9999.000000   -9999.000000       0.064700       0.299000
57026     57026     shaanxi        107.8833       34.3667          103       152     2012      12        14        349              0.188250       0.539154       0.000000       0.248428       0.130000       0.141100       0.082100       0.341000
57026     57026     shaanxi        107.8833       34.3667          103       152     2012      12        15        350              0.000000       1.681183       0.000000       0.274482   -9999.000000   -9999.000000       0.081600       0.258000
57026     57026     shaanxi        107.8833       34.3667          103       152     2012      12        16        351              0.188125       1.282166       0.000000       0.276144   -9999.000000   -9999.000000   -9999.000000   -9999.000000
57026     57026     shaanxi        107.8833       34.3667          103       152     2012      12        17        352              0.188083       2.010895       0.000000       0.286055   -9999.000000   -9999.000000   -9999.000000       0.175000
57026     57026     shaanxi        107.8833       34.3667          103       152     2012      12        18        353              0.187333       2.209106       0.000000       0.282181       0.133000   -9999.000000       0.071200   -9999.000000
57026     57026     shaanxi        107.8833       34.3667          103       152     2012      12        19        354              0.187174       1.909149       0.000000       0.259739   -9999.000000   -9999.000000       0.087600       0.219000
57026     57026     shaanxi        107.8833       34.3667          103       152     2012      12        20        355              0.000000       1.281342       0.369467       0.266107   -9999.000000   -9999.000000       0.084400       0.335000
57026     57026     shaanxi        107.8833       34.3667          103       152     2012      12        21        356              0.187417       0.961121       0.195900       0.262883   -9999.000000   -9999.000000       0.082800   -9999.000000
57026     57026     shaanxi        107.8833       34.3667          103       152     2012      12        22        357              0.187417       1.623169       0.286289       0.268197   -9999.000000   -9999.000000   -9999.000000       0.176000
57026     57026     shaanxi        107.8833       34.3667          103       152     2012      12        23        358              0.185875       0.528809       0.000000       0.244941   -9999.000000   -9999.000000       0.079900   -9999.000000
57026     57026     shaanxi        107.8833       34.3667          103       152     2012      12        24        359              0.182056      -2.043762       0.000000       0.190140       0.111000   -9999.000000       0.051500       0.057000
57026     57026     shaanxi        107.8833       34.3667          103       152     2012      12        25        360              0.178833      -1.632751       0.000000       0.196339   -9999.000000   -9999.000000       0.082100   -9999.000000
57026     57026     shaanxi        107.8833       34.3667          103       152     2012      12        26        361              0.000000      -0.690582       0.000000       0.208793   -9999.000000   -9999.000000       0.082900   -9999.000000
57026     57026     shaanxi        107.8833       34.3667          103       152     2012      12        27        362              0.172333      -1.819794       0.000000       0.192275   -9999.000000       0.230200       0.083200       0.101000
57026     57026     shaanxi        107.8833       34.3667          103       152     2012      12        28        363              0.000000      -1.477051       0.000000       0.195187   -9999.000000   -9999.000000   -9999.000000   -9999.000000
57026     57026     shaanxi        107.8833       34.3667          103       152     2012      12        29        364              0.000000      -0.526886       0.000000       0.212132   -9999.000000   -9999.000000       0.079400       0.121000
57026     57026     shaanxi        107.8833       34.3667          103       152     2012      12        30        365              0.000000      -2.782745       0.000000       0.184381       0.110000   -9999.000000       0.068500   -9999.000000
57026     57026     shaanxi        107.8833       34.3667          103       152     2012      12        31        366              0.165333      -1.306000       0.000000       0.203781   -9999.000000   -9999.000000       0.075800   -9999.000000
