# Supplementary material for: Research on Fusing Multisatellite Soil Moisture Data Based on Bayesian Model Averaging
Source: Hindawi journal article supplement (doi:10.1155/2018/9310838), 2018-06-25
Supplement: f1 [file 9310838.f1.zip › 2012_sm00-10cm_daily_ZDB_ZHY_57031_366days_allin.txt]

57031     57031     shaanxi        108.5500       34.8167          101       154     2012      01        01        001              0.000000   -9999.000000       0.000000   -9999.000000       0.087000   -9999.000000       0.048500   -9999.000000
57031     57031     shaanxi        108.5500       34.8167          101       154     2012      01        02        002              0.141125      -0.965363       0.000000       0.199912       0.093000       0.288800   -9999.000000       0.023000
57031     57031     shaanxi        108.5500       34.8167          101       154     2012      01        03        003              0.000000      -0.625397       0.000000       0.206441   -9999.000000   -9999.000000       0.058000   -9999.000000
57031     57031     shaanxi        108.5500       34.8167          101       154     2012      01        04        004              0.109217      -3.296844       0.000000       0.181673   -9999.000000   -9999.000000       0.052500   -9999.000000
57031     57031     shaanxi        108.5500       34.8167          101       154     2012      01        05        005              0.095583      -3.859680       0.099265       0.173219   -9999.000000       0.198600       0.058100   -9999.000000
57031     57031     shaanxi        108.5500       34.8167          101       154     2012      01        06        006              0.096042      -3.974945       0.000000       0.168139       0.084000   -9999.000000       0.059300       0.095000
57031     57031     shaanxi        108.5500       34.8167          101       154     2012      01        07        007              0.101875      -1.717621       0.000000       0.190971   -9999.000000   -9999.000000       0.056700   -9999.000000
57031     57031     shaanxi        108.5500       34.8167          101       154     2012      01        08        008              0.000000      -2.638428       0.000000       0.178250       0.093000   -9999.000000   -9999.000000   -9999.000000
57031     57031     shaanxi        108.5500       34.8167          101       154     2012      01        09        009              0.104708      -0.796600       0.000000       0.203373   -9999.000000   -9999.000000   -9999.000000       0.009000
57031     57031     shaanxi        108.5500       34.8167          101       154     2012      01        10        010              0.107042      -0.468140       0.000000       0.207641   -9999.000000       0.250100       0.044200   -9999.000000
57031     57031     shaanxi        108.5500       34.8167          101       154     2012      01        11        011              0.102125      -1.154022       0.000000       0.200815       0.082000   -9999.000000       0.044100       0.066000
57031     57031     shaanxi        108.5500       34.8167          101       154     2012      01        12        012              0.103417      -1.241394       0.000000       0.199407       0.091000   -9999.000000       0.043900   -9999.000000
57031     57031     shaanxi        108.5500       34.8167          101       154     2012      01        13        013              0.105500      -1.396393       0.000000       0.195372       0.089000   -9999.000000   -9999.000000   -9999.000000
57031     57031     shaanxi        108.5500       34.8167          101       154     2012      01        14        014              0.107833      -0.888977       4.608636       0.202209   -9999.000000   -9999.000000       0.046000       0.004000
57031     57031     shaanxi        108.5500       34.8167          101       154     2012      01        15        015              0.102250      -0.718048       0.000000       0.204792   -9999.000000       0.152400       0.039700   -9999.000000
57031     57031     shaanxi        108.5500       34.8167          101       154     2012      01        16        016              0.103125      -0.359680       0.000000       0.207181   -9999.000000   -9999.000000       0.035500       0.031000
57031     57031     shaanxi        108.5500       34.8167          101       154     2012      01        17        017              0.000000      -1.002106       0.000000       0.199008       0.088000   -9999.000000       0.037600   -9999.000000
57031     57031     shaanxi        108.5500       34.8167          101       154     2012      01        18        018              0.106583       0.503174       0.000000       0.220403       0.093000       0.054200       0.036300   -9999.000000
57031     57031     shaanxi        108.5500       34.8167          101       154     2012      01        19        019              0.111000      -0.217010       0.000000       0.210078   -9999.000000   -9999.000000   -9999.000000       0.071000
57031     57031     shaanxi        108.5500       34.8167          101       154     2012      01        20        020              0.115292      -1.045441       0.066896       0.196206   -9999.000000       0.125800       0.036000   -9999.000000
57031     57031     shaanxi        108.5500       34.8167          101       154     2012      01        21        021              0.121167      -0.801239       1.959725       0.203442   -9999.000000   -9999.000000       0.032500       0.112000
57031     57031     shaanxi        108.5500       34.8167          101       154     2012      01        22        022              0.125917      -3.114105       0.000000       0.176938   -9999.000000   -9999.000000       0.031200   -9999.000000
57031     57031     shaanxi        108.5500       34.8167          101       154     2012      01        23        023              0.122375      -6.412292       0.000000       0.154858   -9999.000000       0.169600       0.029200       0.001000
57031     57031     shaanxi        108.5500       34.8167          101       154     2012      01        24        024              0.117333      -6.950134       1.967208       0.150088   -9999.000000   -9999.000000   -9999.000000       0.012000
57031     57031     shaanxi        108.5500       34.8167          101       154     2012      01        25        025              0.111542      -7.439087       0.554314       0.149670   -9999.000000       0.162100   -9999.000000   -9999.000000
57031     57031     shaanxi        108.5500       34.8167          101       154     2012      01        26        026              0.108208      -4.717682       0.000000       0.164708   -9999.000000   -9999.000000       0.024600       0.007000
57031     57031     shaanxi        108.5500       34.8167          101       154     2012      01        27        027              0.106333      -3.040253       0.000000       0.176256   -9999.000000   -9999.000000       0.026300   -9999.000000
57031     57031     shaanxi        108.5500       34.8167          101       154     2012      01        28        028              0.108167      -1.392731       0.000000       0.195478       0.096000       0.182700       0.033600       0.186000
57031     57031     shaanxi        108.5500       34.8167          101       154     2012      01        29        029              0.109125       0.058411       0.000000       0.212859       0.099000   -9999.000000       0.033000       0.095000
57031     57031     shaanxi        108.5500       34.8167          101       154     2012      01        30        030              0.107333       0.091980       0.000000       0.216621   -9999.000000   -9999.000000   -9999.000000       0.197000
57031     57031     shaanxi        108.5500       34.8167          101       154     2012      01        31        031              0.109625       0.823242       0.000000       0.223377   -9999.000000   -9999.000000       0.034300       0.251000
57031     57031     shaanxi        108.5500       34.8167          101       154     2012      02        01        032              0.115083       1.995605       0.000000       0.236835   -9999.000000   -9999.000000       0.030500   -9999.000000
57031     57031     shaanxi        108.5500       34.8167          101       154     2012      02        02        033              0.106917       0.417053       0.000000       0.222802   -9999.000000       0.326300       0.035100       0.036000
57031     57031     shaanxi        108.5500       34.8167          101       154     2012      02        03        034              0.104833      -0.986664       0.000000       0.203272       0.106000   -9999.000000       0.047700       0.112000
57031     57031     shaanxi        108.5500       34.8167          101       154     2012      02        04        035              0.113708       0.904053       0.000000       0.221428   -9999.000000   -9999.000000       0.047700       0.337000
57031     57031     shaanxi        108.5500       34.8167          101       154     2012      02        05        036              0.119958       1.070892       0.000000       0.222995   -9999.000000       0.092100   -9999.000000       0.104000
57031     57031     shaanxi        108.5500       34.8167          101       154     2012      02        06        037              0.128625       2.041779       0.000000       0.234674   -9999.000000   -9999.000000       0.042500   -9999.000000
57031     57031     shaanxi        108.5500       34.8167          101       154     2012      02        07        038              0.111958      -0.476868       0.000000       0.213731   -9999.000000       0.181900       0.042000       0.045000
57031     57031     shaanxi        108.5500       34.8167          101       154     2012      02        08        039              0.104167      -2.111298       0.000000       0.191375       0.100000   -9999.000000       0.045500   -9999.000000
57031     57031     shaanxi        108.5500       34.8167          101       154     2012      02        09        040              0.102667      -2.391357       0.000000       0.188808   -9999.000000   -9999.000000       0.047100       0.024000
57031     57031     shaanxi        108.5500       34.8167          101       154     2012      02        10        041              0.104417      -2.562408       0.000000       0.180242   -9999.000000       0.084100   -9999.000000   -9999.000000
57031     57031     shaanxi        108.5500       34.8167          101       154     2012      02        11        042              0.105542      -1.408081       0.000000       0.197342       0.089000   -9999.000000   -9999.000000   -9999.000000
57031     57031     shaanxi        108.5500       34.8167          101       154     2012      02        12        043              0.114792       0.530243       0.000000       0.213578   -9999.000000   -9999.000000   -9999.000000       0.023000
57031     57031     shaanxi        108.5500       34.8167          101       154     2012      02        13        044              0.119167       0.289978       0.000000       0.215344       0.093000   -9999.000000       0.031200   -9999.000000
57031     57031     shaanxi        108.5500       34.8167          101       154     2012      02        14        045              0.125750       0.690247       0.000000       0.220472       0.094000   -9999.000000   -9999.000000       0.113000
57031     57031     shaanxi        108.5500       34.8167          101       154     2012      02        15        046              0.135667       2.301544      14.307232       0.234396   -9999.000000   -9999.000000       0.047500   -9999.000000
57031     57031     shaanxi        108.5500       34.8167          101       154     2012      02        16        047              0.144667       1.076813       2.778554       0.232027       0.092000   -9999.000000   -9999.000000   -9999.000000
57031     57031     shaanxi        108.5500       34.8167          101       154     2012      02        17        048              0.149667       1.112122       0.000000       0.222875       0.092000   -9999.000000       0.041500       0.046000
57031     57031     shaanxi        108.5500       34.8167          101       154     2012      02        18        049              0.150000      -0.226196       0.000000       0.207931       0.094000   -9999.000000       0.033900   -9999.000000
57031     57031     shaanxi        108.5500       34.8167          101       154     2012      02        19        050              0.155833       0.483063       0.000000       0.212990       0.093000   -9999.000000       0.040700       0.032000
57031     57031     shaanxi        108.5500       34.8167          101       154     2012      02        20        051              0.163958       1.990692       0.000000       0.225476   -9999.000000   -9999.000000       0.048500   -9999.000000
57031     57031     shaanxi        108.5500       34.8167          101       154     2012      02        21        052              0.173208       2.596375       0.000000       0.235994   -9999.000000   -9999.000000   -9999.000000       0.105000
57031     57031     shaanxi        108.5500       34.8167          101       154     2012      02        22        053              0.185500       3.347534       0.000000       0.242556       0.074000   -9999.000000   -9999.000000       0.269000
57031     57031     shaanxi        108.5500       34.8167          101       154     2012      02        23        054              0.194500       3.543884       0.000000       0.251738       0.087000       0.038500       0.044700   -9999.000000
57031     57031     shaanxi        108.5500       34.8167          101       154     2012      02        24        055              0.204417       1.827576       0.000000       0.241081       0.088000   -9999.000000       0.044300       0.207000
57031     57031     shaanxi        108.5500       34.8167          101       154     2012      02        25        056              0.207708       1.882111       0.000000       0.235919   -9999.000000       0.487600       0.047000   -9999.000000
57031     57031     shaanxi        108.5500       34.8167          101       154     2012      02        26        057              0.213708       0.162354       0.347146       0.218102   -9999.000000   -9999.000000       0.054500       0.112000
57031     57031     shaanxi        108.5500       34.8167          101       154     2012      02        27        058              0.216875       0.417633       0.000000       0.220022       0.082000   -9999.000000   -9999.000000       0.124000
57031     57031     shaanxi        108.5500       34.8167          101       154     2012      02        28        059              0.218583       1.203644       0.000000       0.229272       0.081000       0.035400   -9999.000000       0.297000
57031     57031     shaanxi        108.5500       34.8167          101       154     2012      02        29        060              0.000000   -9999.000000       0.050559   -9999.000000       0.089000   -9999.000000   -9999.000000   -9999.000000
57031     57031     shaanxi        108.5500       34.8167          101       154     2012      03        01        061              0.233250       1.704529       0.191149       0.236289   -9999.000000   -9999.000000       0.044000   -9999.000000
57031     57031     shaanxi        108.5500       34.8167          101       154     2012      03        02        062              0.242125       2.119049       0.287640       0.247071   -9999.000000   -9999.000000       0.048800       0.417000
57031     57031     shaanxi        108.5500       34.8167          101       154     2012      03        03        063              0.241667       1.664825       6.309521       0.245413       0.101000   -9999.000000       0.047800       0.234000
57031     57031     shaanxi        108.5500       34.8167          101       154     2012      03        04        064              0.240875       1.551300       0.583043       0.242082       0.093000   -9999.000000   -9999.000000       0.306000
57031     57031     shaanxi        108.5500       34.8167          101       154     2012      03        05        065              0.248583       1.392456       0.070517       0.237969       0.102000   -9999.000000       0.044700       0.220000
57031     57031     shaanxi        108.5500       34.8167          101       154     2012      03        06        066              0.244542       2.982117       0.375787       0.250225       0.094000   -9999.000000       0.035500   -9999.000000
57031     57031     shaanxi        108.5500       34.8167          101       154     2012      03        07        067              0.000000       2.361176       0.000000       0.246207   -9999.000000   -9999.000000       0.042800       0.300000
57031     57031     shaanxi        108.5500       34.8167          101       154     2012      03        08        068              0.239583       3.198853       0.336931       0.252059   -9999.000000   -9999.000000       0.053700   -9999.000000
57031     57031     shaanxi        108.5500       34.8167          101       154     2012      03        09        069              0.238500       2.249542       0.503086       0.252990       0.098000   -9999.000000       0.052300       0.215000
57031     57031     shaanxi        108.5500       34.8167          101       154     2012      03        10        070              0.234292       2.938416       0.000000       0.254299       0.109000   -9999.000000   -9999.000000       0.304000
57031     57031     shaanxi        108.5500       34.8167          101       154     2012      03        11        071              0.229417       6.748993       0.000000       0.265842       0.088000   -9999.000000       0.042900   -9999.000000
57031     57031     shaanxi        108.5500       34.8167          101       154     2012      03        12        072              0.223833       6.371613       0.000000       0.262282   -9999.000000   -9999.000000       0.045900       0.353000
57031     57031     shaanxi        108.5500       34.8167          101       154     2012      03        13        073              0.220417       6.566986       0.000000       0.263075   -9999.000000   -9999.000000       0.050800   -9999.000000
57031     57031     shaanxi        108.5500       34.8167          101       154     2012      03        14        074              0.216458       9.844543       0.728740       0.260117       0.078000   -9999.000000   -9999.000000       0.279000
57031     57031     shaanxi        108.5500       34.8167          101       154     2012      03        15        075              0.212625       9.554108       0.438968       0.258196       0.089000   -9999.000000   -9999.000000   -9999.000000
57031     57031     shaanxi        108.5500       34.8167          101       154     2012      03        16        076              0.213792       5.049011       0.000000       0.262015       0.082000   -9999.000000   -9999.000000   -9999.000000
57031     57031     shaanxi        108.5500       34.8167          101       154     2012      03        17        077              0.211792       9.874603       0.000000       0.258376   -9999.000000       0.249200       0.041700       0.355000
57031     57031     shaanxi        108.5500       34.8167          101       154     2012      03        18        078              0.208125      12.880676       0.000000       0.253059       0.081000   -9999.000000       0.045900   -9999.000000
57031     57031     shaanxi        108.5500       34.8167          101       154     2012      03        19        079              0.202667      12.550720       0.000000       0.246749       0.081500   -9999.000000       0.050900       0.210000
57031     57031     shaanxi        108.5500       34.8167          101       154     2012      03        20        080              0.199333       7.499115       0.283217       0.249123       0.079500   -9999.000000       0.051200   -9999.000000
57031     57031     shaanxi        108.5500       34.8167          101       154     2012      03        21        081              0.196292       6.929077       0.140170       0.251741       0.115000   -9999.000000   -9999.000000       0.260000
57031     57031     shaanxi        108.5500       34.8167          101       154     2012      03        22        082              0.200208       3.687256       9.806733       0.255805   -9999.000000   -9999.000000       0.054700       0.497000
57031     57031     shaanxi        108.5500       34.8167          101       154     2012      03        23        083              0.202000       4.363495       0.000000       0.299291   -9999.000000   -9999.000000       0.042200   -9999.000000
57031     57031     shaanxi        108.5500       34.8167          101       154     2012      03        24        084              0.200542       6.866425       0.000000       0.277895       0.090000   -9999.000000       0.047100       0.150000
57031     57031     shaanxi        108.5500       34.8167          101       154     2012      03        25        085              0.000000      10.735535       0.000000       0.270018       0.084500   -9999.000000       0.045400   -9999.000000
57031     57031     shaanxi        108.5500       34.8167          101       154     2012      03        26        086              0.195750      12.267761       0.000000       0.261617       0.088000   -9999.000000       0.046100       0.245000
57031     57031     shaanxi        108.5500       34.8167          101       154     2012      03        27        087              0.192292      13.758148       0.860754       0.255040       0.084000   -9999.000000   -9999.000000       0.294000
57031     57031     shaanxi        108.5500       34.8167          101       154     2012      03        28        088              0.189083      14.642120       0.558018       0.249808       0.102000   -9999.000000       0.063000       0.555000
57031     57031     shaanxi        108.5500       34.8167          101       154     2012      03        29        089              0.194500      10.059814       0.000000       0.260375       0.091000   -9999.000000       0.060400       0.249000
57031     57031     shaanxi        108.5500       34.8167          101       154     2012      03        30        090              0.190792      13.263214       0.561927       0.256333       0.076000       0.030300       0.047800   -9999.000000
57031     57031     shaanxi        108.5500       34.8167          101       154     2012      03        31        091              0.188208       9.784058       0.394551       0.250232       0.083000   -9999.000000       0.047100       0.167000
57031     57031     shaanxi        108.5500       34.8167          101       154     2012      04        01        092              0.184958      14.096466       0.000000       0.242707       0.089000   -9999.000000   -9999.000000       0.147000
57031     57031     shaanxi        108.5500       34.8167          101       154     2012      04        02        093              0.179750      15.064850       0.139009       0.237756   -9999.000000   -9999.000000   -9999.000000       0.382000
57031     57031     shaanxi        108.5500       34.8167          101       154     2012      04        03        094              0.175333      11.445648       0.000000       0.234785       0.093000   -9999.000000       0.045000       0.041000
57031     57031     shaanxi        108.5500       34.8167          101       154     2012      04        04        095              0.172167      13.555634       0.000000       0.228666       0.081000       0.159400       0.051400   -9999.000000
57031     57031     shaanxi        108.5500       34.8167          101       154     2012      04        05        096              0.167125      15.977509       0.000000       0.220959       0.081000   -9999.000000       0.047000       0.110000
57031     57031     shaanxi        108.5500       34.8167          101       154     2012      04        06        097              0.162250      15.118713       0.000000       0.215841       0.087000   -9999.000000       0.046400   -9999.000000
57031     57031     shaanxi        108.5500       34.8167          101       154     2012      04        07        098              0.157875      15.466522       0.000000       0.211936   -9999.000000   -9999.000000   -9999.000000       0.128000
57031     57031     shaanxi        108.5500       34.8167          101       154     2012      04        08        099              0.153375      16.880676       0.421677       0.206993       0.089000   -9999.000000       0.047800       0.231000
57031     57031     shaanxi        108.5500       34.8167          101       154     2012      04        09        100              0.149208      18.654083       0.498119       0.202082       0.099500   -9999.000000       0.065500   -9999.000000
57031     57031     shaanxi        108.5500       34.8167          101       154     2012      04        10        101              0.147625      14.480682       0.000000       0.210204       0.084500   -9999.000000       0.063900       0.071000
57031     57031     shaanxi        108.5500       34.8167          101       154     2012      04        11        102              0.143292      18.256409       3.973786       0.209285       0.101000   -9999.000000       0.057100   -9999.000000
57031     57031     shaanxi        108.5500       34.8167          101       154     2012      04        12        103              0.138708      15.178375       0.952628       0.221873       0.109000   -9999.000000       0.061300       0.141000
57031     57031     shaanxi        108.5500       34.8167          101       154     2012      04        13        104              0.139250      10.888397       0.000000       0.255916       0.104000   -9999.000000   -9999.000000   -9999.000000
57031     57031     shaanxi        108.5500       34.8167          101       154     2012      04        14        105              0.138542      15.210541       0.000000       0.235623       0.098500   -9999.000000       0.056700   -9999.000000
57031     57031     shaanxi        108.5500       34.8167          101       154     2012      04        15        106              0.135833      16.624237       0.000000       0.224907       0.090000   -9999.000000       0.059200       0.171000
57031     57031     shaanxi        108.5500       34.8167          101       154     2012      04        16        107              0.131292      18.917114       0.172098       0.213561       0.095000   -9999.000000       0.061900   -9999.000000
57031     57031     shaanxi        108.5500       34.8167          101       154     2012      04        17        108              0.128125      18.702332       0.050714       0.205126       0.095000       0.052300       0.068000       0.210000
57031     57031     shaanxi        108.5500       34.8167          101       154     2012      04        18        109              0.126250      15.637299       0.000000       0.205889       0.101000   -9999.000000   -9999.000000   -9999.000000
57031     57031     shaanxi        108.5500       34.8167          101       154     2012      04        19        110              0.123500      19.218231       0.311114       0.200444       0.093000   -9999.000000       0.072600       0.138000
57031     57031     shaanxi        108.5500       34.8167          101       154     2012      04        20        111              0.122042      16.548553       0.369437       0.201171       0.099000   -9999.000000       0.060100       0.104000
57031     57031     shaanxi        108.5500       34.8167          101       154     2012      04        21        112              0.119583      17.531982       0.000000       0.200923       0.118500   -9999.000000       0.068300   -9999.000000
57031     57031     shaanxi        108.5500       34.8167          101       154     2012      04        22        113              0.116833      21.250427       0.000000       0.191692       0.119000       0.195200   -9999.000000       0.075000
57031     57031     shaanxi        108.5500       34.8167          101       154     2012      04        23        114              0.114375      23.497528       0.956812       0.185386   -9999.000000   -9999.000000       0.068800   -9999.000000
57031     57031     shaanxi        108.5500       34.8167          101       154     2012      04        24        115              0.113958      21.085815       0.227656       0.193586       0.142000   -9999.000000   -9999.000000       0.821000
57031     57031     shaanxi        108.5500       34.8167          101       154     2012      04        25        116              0.000000      17.290192       0.086987       0.194914       0.119500   -9999.000000       0.079000       0.056000
57031     57031     shaanxi        108.5500       34.8167          101       154     2012      04        26        117              0.114667      18.158142       0.000000       0.186132       0.107500   -9999.000000       0.071300       0.329000
57031     57031     shaanxi        108.5500       34.8167          101       154     2012      04        27        118              0.114292      21.517273       0.000000       0.180231       0.108000   -9999.000000       0.069400       0.060000
57031     57031     shaanxi        108.5500       34.8167          101       154     2012      04        28        119              0.112500      24.039337       7.988720       0.177144   -9999.000000   -9999.000000       0.069400   -9999.000000
57031     57031     shaanxi        108.5500       34.8167          101       154     2012      04        29        120              0.109708      23.807159       0.000000       0.228486       0.116000   -9999.000000       0.068400       0.082000
57031     57031     shaanxi        108.5500       34.8167          101       154     2012      04        30        121              0.106833      22.392273       0.321265       0.241549       0.135000   -9999.000000   -9999.000000       0.344000
57031     57031     shaanxi        108.5500       34.8167          101       154     2012      05        01        122              0.107750      18.699921       0.065637       0.232030       0.156000   -9999.000000       0.095700       0.635000
57031     57031     shaanxi        108.5500       34.8167          101       154     2012      05        02        123              0.110125      16.852631       2.960580       0.231430   -9999.000000   -9999.000000       0.105200       0.709000
57031     57031     shaanxi        108.5500       34.8167          101       154     2012      05        03        124              0.113958      17.094025       0.488931       0.251566       0.149000   -9999.000000       0.095100   -9999.000000
57031     57031     shaanxi        108.5500       34.8167          101       154     2012      05        04        125              0.117292      18.806519       0.375367       0.250937       0.146000   -9999.000000       0.083900       0.190000
57031     57031     shaanxi        108.5500       34.8167          101       154     2012      05        05        126              0.115333      21.302063       0.000000       0.232472       0.144000   -9999.000000   -9999.000000   -9999.000000
57031     57031     shaanxi        108.5500       34.8167          101       154     2012      05        06        127              0.112958      23.332306       0.143280       0.212636       0.134000   -9999.000000       0.099000       0.228000
57031     57031     shaanxi        108.5500       34.8167          101       154     2012      05        07        128              0.111292      22.831726       1.023630       0.203746   -9999.000000       0.435100       0.085900       0.191000
57031     57031     shaanxi        108.5500       34.8167          101       154     2012      05        08        129              0.109250      23.133392       0.261936       0.199844   -9999.000000   -9999.000000       0.098500   -9999.000000
57031     57031     shaanxi        108.5500       34.8167          101       154     2012      05        09        130              0.106375      24.752563       0.877958       0.195890   -9999.000000       0.126100       0.092800       0.279000
57031     57031     shaanxi        108.5500       34.8167          101       154     2012      05        10        131              0.103375      23.613831      11.137265       0.191788   -9999.000000       0.785200       0.087000   -9999.000000
57031     57031     shaanxi        108.5500       34.8167          101       154     2012      05        11        132              0.104958      25.463562       1.449734       0.210087       0.201000   -9999.000000   -9999.000000       0.535000
57031     57031     shaanxi        108.5500       34.8167          101       154     2012      05        12        133              0.109000      18.614014       0.000000       0.286263       0.177500   -9999.000000       0.103300   -9999.000000
57031     57031     shaanxi        108.5500       34.8167          101       154     2012      05        13        134              0.108792      17.734039       1.521129       0.254671       0.170000   -9999.000000       0.102000   -9999.000000
57031     57031     shaanxi        108.5500       34.8167          101       154     2012      05        14        135              0.108708      16.819031       0.000000       0.252741   -9999.000000   -9999.000000       0.112400       0.233000
57031     57031     shaanxi        108.5500       34.8167          101       154     2012      05        15        136              0.106042      19.521484       0.000000       0.236835       0.170000       0.056600       0.105600   -9999.000000
57031     57031     shaanxi        108.5500       34.8167          101       154     2012      05        16        137              0.102292      21.227539       0.000000       0.217141       0.142000   -9999.000000   -9999.000000       0.267000
57031     57031     shaanxi        108.5500       34.8167          101       154     2012      05        17        138              0.099375      21.955780       0.000000       0.202521       0.140500   -9999.000000   -9999.000000   -9999.000000
57031     57031     shaanxi        108.5500       34.8167          101       154     2012      05        18        139              0.096542      23.357758       0.000000       0.192859       0.154000   -9999.000000       0.099900       0.370000
57031     57031     shaanxi        108.5500       34.8167          101       154     2012      05        19        140              0.093208      24.877869       0.230448       0.186965   -9999.000000   -9999.000000       0.107100       0.384000
57031     57031     shaanxi        108.5500       34.8167          101       154     2012      05        20        141              0.090167      26.749115       0.735939       0.181875   -9999.000000   -9999.000000       0.102300   -9999.000000
57031     57031     shaanxi        108.5500       34.8167          101       154     2012      05        21        142              0.087833      23.353516      12.898738       0.182953       0.254000   -9999.000000       0.153800       0.825000
57031     57031     shaanxi        108.5500       34.8167          101       154     2012      05        22        143              0.090042      16.700592       0.000000       0.288653       0.201500       0.165700   -9999.000000   -9999.000000
57031     57031     shaanxi        108.5500       34.8167          101       154     2012      05        23        144              0.092583      18.129456       0.079067       0.274992   -9999.000000   -9999.000000       0.143400       0.608000
57031     57031     shaanxi        108.5500       34.8167          101       154     2012      05        24        145              0.093708      17.521301       0.115948       0.260566       0.205000   -9999.000000       0.118400       0.428000
57031     57031     shaanxi        108.5500       34.8167          101       154     2012      05        25        146              0.000000      16.951447       0.968853       0.253460       0.199000   -9999.000000       0.128200       0.490000
57031     57031     shaanxi        108.5500       34.8167          101       154     2012      05        26        147              0.094292      20.002411       3.491579       0.242247       0.190000   -9999.000000       0.115600       0.366000
57031     57031     shaanxi        108.5500       34.8167          101       154     2012      05        27        148              0.092292      23.157379       0.000000       0.251057       0.171500       0.065900       0.112700   -9999.000000
57031     57031     shaanxi        108.5500       34.8167          101       154     2012      05        28        149              0.089917      24.946167      17.631134       0.225492   -9999.000000       0.155400   -9999.000000       0.996000
57031     57031     shaanxi        108.5500       34.8167          101       154     2012      05        29        150              0.093458      18.415070       1.441355       0.298909       0.188000   -9999.000000       0.124800       0.427000
57031     57031     shaanxi        108.5500       34.8167          101       154     2012      05        30        151              0.094083      21.190948       0.000000       0.295953       0.188000   -9999.000000       0.120000   -9999.000000
57031     57031     shaanxi        108.5500       34.8167          101       154     2012      05        31        152              0.092833      22.898254       0.053908       0.268073       0.187000   -9999.000000       0.120300   -9999.000000
57031     57031     shaanxi        108.5500       34.8167          101       154     2012      06        01        153              0.091208      20.574066       0.000000       0.260106       0.149000   -9999.000000       0.115300   -9999.000000
57031     57031     shaanxi        108.5500       34.8167          101       154     2012      06        02        154              0.089042      23.513214       0.000000       0.243473       0.144000   -9999.000000   -9999.000000       0.405000
57031     57031     shaanxi        108.5500       34.8167          101       154     2012      06        03        155              0.087125      23.968811       0.000000       0.229790       0.149000   -9999.000000   -9999.000000   -9999.000000
57031     57031     shaanxi        108.5500       34.8167          101       154     2012      06        04        156              0.085833      23.533051       0.000000       0.221801   -9999.000000   -9999.000000       0.131100       0.382000
57031     57031     shaanxi        108.5500       34.8167          101       154     2012      06        05        157              0.084083      24.974548       3.636659       0.211208       0.181000   -9999.000000       0.152800       0.505000
57031     57031     shaanxi        108.5500       34.8167          101       154     2012      06        06        158              0.083708      21.020905       0.000000       0.244625       0.141000   -9999.000000       0.136600   -9999.000000
57031     57031     shaanxi        108.5500       34.8167          101       154     2012      06        07        159              0.083458      22.991730       0.792541       0.237266       0.143000   -9999.000000       0.136700       0.436000
57031     57031     shaanxi        108.5500       34.8167          101       154     2012      06        08        160              0.081083      25.120911      20.810768       0.216703       0.146000   -9999.000000   -9999.000000   -9999.000000
57031     57031     shaanxi        108.5500       34.8167          101       154     2012      06        09        161              0.080792      24.122467      14.111829       0.205352       0.141000   -9999.000000       0.141200       0.501000
57031     57031     shaanxi        108.5500       34.8167          101       154     2012      06        10        162              0.078833      27.824432       0.000000       0.191144       0.143000   -9999.000000       0.125800   -9999.000000
57031     57031     shaanxi        108.5500       34.8167          101       154     2012      06        11        163              0.000000      27.577942       0.000000       0.183146       0.143500   -9999.000000       0.162900   -9999.000000
57031     57031     shaanxi        108.5500       34.8167          101       154     2012      06        12        164              0.075167      26.648010       0.000000       0.178934       0.141500   -9999.000000       0.161000       0.445000
57031     57031     shaanxi        108.5500       34.8167          101       154     2012      06        13        165              0.074167      28.656158       0.000000       0.175699       0.153000   -9999.000000       0.152700   -9999.000000
57031     57031     shaanxi        108.5500       34.8167          101       154     2012      06        14        166              0.072125      30.605865       0.000000       0.173767       0.150000   -9999.000000   -9999.000000       0.426000
57031     57031     shaanxi        108.5500       34.8167          101       154     2012      06        15        167              0.070875      26.735748       0.000000       0.173212       0.151000       0.247300       0.159000   -9999.000000
57031     57031     shaanxi        108.5500       34.8167          101       154     2012      06        16        168              0.070250      27.688416       0.000000       0.172656       0.155000   -9999.000000       0.161900       0.389000
57031     57031     shaanxi        108.5500       34.8167          101       154     2012      06        17        169              0.069458      28.433685       0.000000       0.171271       0.151000   -9999.000000       0.159100       0.495000
57031     57031     shaanxi        108.5500       34.8167          101       154     2012      06        18        170              0.068625      29.307739       5.266522       0.171056       0.160000   -9999.000000       0.102700   -9999.000000
57031     57031     shaanxi        108.5500       34.8167          101       154     2012      06        19        171              0.066458      26.866333       0.749761       0.214290       0.149000   -9999.000000   -9999.000000       0.370000
57031     57031     shaanxi        108.5500       34.8167          101       154     2012      06        20        172              0.067083      24.381744       0.000000       0.228316       0.166000   -9999.000000   -9999.000000   -9999.000000
57031     57031     shaanxi        108.5500       34.8167          101       154     2012      06        21        173              0.068458      27.557281       1.437287       0.202153       0.166000   -9999.000000       0.129100       0.408000
57031     57031     shaanxi        108.5500       34.8167          101       154     2012      06        22        174              0.068583      29.354004       0.000000       0.192873       0.140500   -9999.000000       0.135800       0.435000
57031     57031     shaanxi        108.5500       34.8167          101       154     2012      06        23        175              0.068042      30.068542      13.854952       0.186855       0.121000   -9999.000000       0.127300       0.508000
57031     57031     shaanxi        108.5500       34.8167          101       154     2012      06        24        176              0.067708      29.852142       2.840183       0.230563       0.150000   -9999.000000       0.142400       0.491000
57031     57031     shaanxi        108.5500       34.8167          101       154     2012      06        25        177              0.066542      26.056885       3.550486       0.291981   -9999.000000   -9999.000000   -9999.000000   -9999.000000
57031     57031     shaanxi        108.5500       34.8167          101       154     2012      06        26        178              0.066292      23.623016       0.769164       0.288155       0.172000   -9999.000000       0.121000       0.638000
57031     57031     shaanxi        108.5500       34.8167          101       154     2012      06        27        179              0.066375      23.559021       0.340680       0.262865       0.164500   -9999.000000       0.113800       0.488000
57031     57031     shaanxi        108.5500       34.8167          101       154     2012      06        28        180              0.067375      23.789001       4.778441       0.248549       0.164000   -9999.000000       0.135900       0.582000
57031     57031     shaanxi        108.5500       34.8167          101       154     2012      06        29        181              0.088167      23.879547      18.511232       0.255746       0.198000   -9999.000000       0.156000   -9999.000000
57031     57031     shaanxi        108.5500       34.8167          101       154     2012      06        30        182              0.110417      22.761810       0.593014       0.333153       0.185000   -9999.000000       0.130700   -9999.000000
57031     57031     shaanxi        108.5500       34.8167          101       154     2012      07        01        183              0.111833      25.376526       5.077245       0.291251   -9999.000000   -9999.000000   -9999.000000       0.542000
57031     57031     shaanxi        108.5500       34.8167          101       154     2012      07        02        184              0.158417      27.124481      11.088531       0.278001       0.183000   -9999.000000       0.144900   -9999.000000
57031     57031     shaanxi        108.5500       34.8167          101       154     2012      07        03        185              0.163750      22.941864       1.602586       0.327130       0.147000       0.220200       0.129400       0.658000
57031     57031     shaanxi        108.5500       34.8167          101       154     2012      07        04        186              0.158292      26.692505       1.067567       0.296723       0.167000   -9999.000000       0.160100       0.671000
57031     57031     shaanxi        108.5500       34.8167          101       154     2012      07        05        187              0.152708      24.126648       0.000000       0.296146       0.164000       0.470900       0.144700   -9999.000000
57031     57031     shaanxi        108.5500       34.8167          101       154     2012      07        06        188              0.143958      27.172638       0.000000       0.274282   -9999.000000   -9999.000000   -9999.000000       0.548000
57031     57031     shaanxi        108.5500       34.8167          101       154     2012      07        07        189              0.136875      26.980591       1.689323       0.262563   -9999.000000       0.130000   -9999.000000   -9999.000000
57031     57031     shaanxi        108.5500       34.8167          101       154     2012      07        08        190              0.224167      25.848267      22.124332       0.264814       0.203000       0.007900       0.132400       0.960000
57031     57031     shaanxi        108.5500       34.8167          101       154     2012      07        09        191              0.272750      22.799774      19.189316       0.344805       0.198000   -9999.000000       0.173600   -9999.000000
57031     57031     shaanxi        108.5500       34.8167          101       154     2012      07        10        192              0.248667      22.445038       0.508771       0.358653       0.175000   -9999.000000       0.184600   -9999.000000
57031     57031     shaanxi        108.5500       34.8167          101       154     2012      07        11        193              0.234208      27.678680       0.966042       0.322987   -9999.000000   -9999.000000       0.165900       0.648000
57031     57031     shaanxi        108.5500       34.8167          101       154     2012      07        12        194              0.220000      26.979950       7.758754       0.310693       0.166000       0.199500   -9999.000000   -9999.000000
57031     57031     shaanxi        108.5500       34.8167          101       154     2012      07        13        195              0.206542      27.636078      10.245731       0.297372       0.191000   -9999.000000       0.159100       0.719000
57031     57031     shaanxi        108.5500       34.8167          101       154     2012      07        14        196              0.198208      24.868835       0.635439       0.324826       0.159500   -9999.000000       0.152800   -9999.000000
57031     57031     shaanxi        108.5500       34.8167          101       154     2012      07        15        197              0.188958      25.839447       0.400150       0.309221       0.180000   -9999.000000       0.153700       0.786000
57031     57031     shaanxi        108.5500       34.8167          101       154     2012      07        16        198              0.178542      26.290192       2.471534       0.299182       0.184000   -9999.000000       0.140100       0.565000
57031     57031     shaanxi        108.5500       34.8167          101       154     2012      07        17        199              0.167875      25.914642       0.138340       0.290023       0.163000   -9999.000000       0.131500   -9999.000000
57031     57031     shaanxi        108.5500       34.8167          101       154     2012      07        18        200              0.158417      25.559082       0.000000       0.281056       0.168000   -9999.000000   -9999.000000       0.466000
57031     57031     shaanxi        108.5500       34.8167          101       154     2012      07        19        201              0.151583      26.267670       0.772725       0.272789       0.161500   -9999.000000       0.124200   -9999.000000
57031     57031     shaanxi        108.5500       34.8167          101       154     2012      07        20        202              0.146130      26.157013       0.173804       0.268469       0.178500       0.090000       0.125000       0.590000
57031     57031     shaanxi        108.5500       34.8167          101       154     2012      07        21        203              0.144043      26.831604      16.407513       0.264424   -9999.000000   -9999.000000       0.128800       0.971000
57031     57031     shaanxi        108.5500       34.8167          101       154     2012      07        22        204              0.145292      23.374115       0.781237       0.328100   -9999.000000   -9999.000000       0.137400       0.820000
57031     57031     shaanxi        108.5500       34.8167          101       154     2012      07        23        205              0.144083      25.894592       3.307870       0.304696   -9999.000000       0.310900   -9999.000000       0.806000
57031     57031     shaanxi        108.5500       34.8167          101       154     2012      07        24        206              0.144958      23.538269       0.955604       0.305482       0.178500   -9999.000000       0.122700   -9999.000000
57031     57031     shaanxi        108.5500       34.8167          101       154     2012      07        25        207              0.145792      25.745117       0.984207       0.301710       0.188000   -9999.000000       0.099300       0.634000
57031     57031     shaanxi        108.5500       34.8167          101       154     2012      07        26        208              0.143375      27.705872       0.139114       0.293121       0.180000       0.336100       0.107800       0.568000
57031     57031     shaanxi        108.5500       34.8167          101       154     2012      07        27        209              0.137375      29.098480       1.822578       0.279399   -9999.000000   -9999.000000       0.108700       0.737000
57031     57031     shaanxi        108.5500       34.8167          101       154     2012      07        28        210              0.129875      29.420776       0.384548       0.266423       0.168000       0.340100       0.101800       0.511000
57031     57031     shaanxi        108.5500       34.8167          101       154     2012      07        29        211              0.122917      30.376648       0.000000       0.254944       0.160000   -9999.000000   -9999.000000   -9999.000000
57031     57031     shaanxi        108.5500       34.8167          101       154     2012      07        30        212              0.117042      31.307861       1.251214       0.242047       0.173000   -9999.000000       0.098900       0.668000
57031     57031     shaanxi        108.5500       34.8167          101       154     2012      07        31        213              0.113667      27.654663       0.829269       0.247451       0.181000   -9999.000000       0.091500   -9999.000000
57031     57031     shaanxi        108.5500       34.8167          101       154     2012      08        01        214              0.111792      24.808868       0.872886       0.247934       0.184000   -9999.000000       0.097200       0.540000
57031     57031     shaanxi        108.5500       34.8167          101       154     2012      08        02        215              0.110458      25.293213       0.184748       0.247661       0.184000   -9999.000000       0.094700       0.462000
57031     57031     shaanxi        108.5500       34.8167          101       154     2012      08        03        216              0.108000      27.028351       0.934763       0.246952       0.180000   -9999.000000   -9999.000000   -9999.000000
57031     57031     shaanxi        108.5500       34.8167          101       154     2012      08        04        217              0.104542      28.204071       0.000000       0.235688       0.160000   -9999.000000   -9999.000000       0.501000
57031     57031     shaanxi        108.5500       34.8167          101       154     2012      08        05        218              0.102000      28.001129       0.523961       0.225668       0.183500   -9999.000000       0.092600   -9999.000000
57031     57031     shaanxi        108.5500       34.8167          101       154     2012      08        06        219              0.100083      26.362885       0.899874       0.229521       0.206000   -9999.000000       0.080100       0.524000
57031     57031     shaanxi        108.5500       34.8167          101       154     2012      08        07        220              0.097708      26.933777       2.952596       0.234109   -9999.000000   -9999.000000       0.078100   -9999.000000
57031     57031     shaanxi        108.5500       34.8167          101       154     2012      08        08        221              0.095292      27.828979       3.805596       0.245892       0.191000       0.039800       0.087800   -9999.000000
57031     57031     shaanxi        108.5500       34.8167          101       154     2012      08        09        222              0.093792      26.766907      16.608501       0.266294       0.202000   -9999.000000   -9999.000000       0.785000
57031     57031     shaanxi        108.5500       34.8167          101       154     2012      08        10        223              0.091833      26.249573       0.000000       0.337356       0.172000       0.454600   -9999.000000   -9999.000000
57031     57031     shaanxi        108.5500       34.8167          101       154     2012      08        11        224              0.090250      26.357758       2.287627       0.291730       0.189000   -9999.000000       0.081500       0.609000
57031     57031     shaanxi        108.5500       34.8167          101       154     2012      08        12        225              0.089375      28.109711       9.826890       0.276697       0.191000       0.366200       0.100800   -9999.000000
57031     57031     shaanxi        108.5500       34.8167          101       154     2012      08        13        226              0.088333      27.116516       2.045682       0.303386       0.235000       0.508600       0.142700       1.000000
57031     57031     shaanxi        108.5500       34.8167          101       154     2012      08        14        227              0.087625      22.848846       1.153336       0.313852       0.219000   -9999.000000       0.140600       0.953000
57031     57031     shaanxi        108.5500       34.8167          101       154     2012      08        15        228              0.089083      22.948212       0.000000       0.303799       0.201500       0.120800   -9999.000000   -9999.000000
57031     57031     shaanxi        108.5500       34.8167          101       154     2012      08        16        229              0.089333      25.775635       0.000000       0.287600       0.211000   -9999.000000       0.121200       0.698000
57031     57031     shaanxi        108.5500       34.8167          101       154     2012      08        17        230              0.089542      26.004303      21.779087       0.277001       0.220000   -9999.000000       0.142300   -9999.000000
57031     57031     shaanxi        108.5500       34.8167          101       154     2012      08        18        231              0.103083      24.888000       3.969790       0.316595   -9999.000000   -9999.000000       0.145000       1.000000
57031     57031     shaanxi        108.5500       34.8167          101       154     2012      08        19        232              0.177750      20.959869      12.101563       0.337846       0.220000   -9999.000000       0.144700       1.000000
57031     57031     shaanxi        108.5500       34.8167          101       154     2012      08        20        233              0.195792      20.531006       1.047621       0.350444       0.243000   -9999.000000   -9999.000000       1.000000
57031     57031     shaanxi        108.5500       34.8167          101       154     2012      08        21        234              0.187417      21.377808       0.000000       0.328334       0.195500   -9999.000000   -9999.000000       1.000000
57031     57031     shaanxi        108.5500       34.8167          101       154     2012      08        22        235              0.177667      21.597382       0.000000       0.315677       0.179000   -9999.000000       0.104700   -9999.000000
57031     57031     shaanxi        108.5500       34.8167          101       154     2012      08        23        236              0.168667      22.488434       0.391005       0.304228       0.184000   -9999.000000       0.113300       0.614000
57031     57031     shaanxi        108.5500       34.8167          101       154     2012      08        24        237              0.160208      22.575958       0.000000       0.297135   -9999.000000   -9999.000000       0.103300   -9999.000000
57031     57031     shaanxi        108.5500       34.8167          101       154     2012      08        25        238              0.000000      23.667236       6.590769       0.289530       0.167000       0.051600       0.107500   -9999.000000
57031     57031     shaanxi        108.5500       34.8167          101       154     2012      08        26        239              0.160042      24.084747       0.000000       0.299376       0.184500       0.160700   -9999.000000       0.681000
57031     57031     shaanxi        108.5500       34.8167          101       154     2012      08        27        240              0.161125      23.737854       5.293076       0.307167       0.195000   -9999.000000       0.163600   -9999.000000
57031     57031     shaanxi        108.5500       34.8167          101       154     2012      08        28        241              0.159458      23.431946       0.000000       0.311598       0.185000   -9999.000000       0.140700       0.758000
57031     57031     shaanxi        108.5500       34.8167          101       154     2012      08        29        242              0.156583      24.527924       0.000000       0.302828       0.171000   -9999.000000       0.142100   -9999.000000
57031     57031     shaanxi        108.5500       34.8167          101       154     2012      08        30        243              0.150500      25.463959      13.098316       0.289208   -9999.000000       0.150200       0.142200       0.566000
57031     57031     shaanxi        108.5500       34.8167          101       154     2012      08        31        244              0.217292      25.013031      29.225498       0.300143   -9999.000000   -9999.000000       0.177700       1.000000
57031     57031     shaanxi        108.5500       34.8167          101       154     2012      09        01        245              0.272875      20.202209      18.235880       0.367238       0.224000   -9999.000000   -9999.000000   -9999.000000
57031     57031     shaanxi        108.5500       34.8167          101       154     2012      09        02        246              0.247667      17.556030       0.000000       0.373820       0.201000   -9999.000000       0.170300       0.874000
57031     57031     shaanxi        108.5500       34.8167          101       154     2012      09        03        247              0.234375      20.072784       0.000000       0.345261   -9999.000000   -9999.000000       0.121100   -9999.000000
57031     57031     shaanxi        108.5500       34.8167          101       154     2012      09        04        248              0.223042      21.800720       0.000000       0.333779       0.187000   -9999.000000       0.109600       0.687000
57031     57031     shaanxi        108.5500       34.8167          101       154     2012      09        05        249              0.213333      22.537628       0.000000       0.325815       0.172000       0.182000       0.107400   -9999.000000
57031     57031     shaanxi        108.5500       34.8167          101       154     2012      09        06        250              0.204833      23.759430       0.000000       0.320085       0.170000   -9999.000000   -9999.000000   -9999.000000
57031     57031     shaanxi        108.5500       34.8167          101       154     2012      09        07        251              0.199500      22.760986      18.679274       0.316590       0.203000       0.292500   -9999.000000       1.000000
57031     57031     shaanxi        108.5500       34.8167          101       154     2012      09        08        252              0.230250      21.621002       2.308368       0.346681       0.243000   -9999.000000       0.117900   -9999.000000
57031     57031     shaanxi        108.5500       34.8167          101       154     2012      09        09        253              0.226833      20.711395       0.427413       0.350121       0.187000   -9999.000000       0.121100       0.874000
57031     57031     shaanxi        108.5500       34.8167          101       154     2012      09        10        254              0.282000      20.893829      39.083984       0.338417       0.213000   -9999.000000       0.188200   -9999.000000
57031     57031     shaanxi        108.5500       34.8167          101       154     2012      09        11        255              0.260292      17.845184       0.178031       0.385913       0.208000   -9999.000000       0.182100       1.000000
57031     57031     shaanxi        108.5500       34.8167          101       154     2012      09        12        256              0.247833      20.057159       0.000000       0.354219       0.209000   -9999.000000   -9999.000000       0.841000
57031     57031     shaanxi        108.5500       34.8167          101       154     2012      09        13        257              0.237083      16.238373       0.994124       0.345014       0.185000       0.044800       0.168300   -9999.000000
57031     57031     shaanxi        108.5500       34.8167          101       154     2012      09        14        258              0.228333      16.781616       0.000000       0.338888   -9999.000000       0.214300       0.144400       0.572000
57031     57031     shaanxi        108.5500       34.8167          101       154     2012      09        15        259              0.229958      18.029572      10.864078       0.334106       0.220000   -9999.000000       0.172700   -9999.000000
57031     57031     shaanxi        108.5500       34.8167          101       154     2012      09        16        260              0.242417      17.064850       0.340122       0.351896       0.225000   -9999.000000       0.189200       1.000000
57031     57031     shaanxi        108.5500       34.8167          101       154     2012      09        17        261              0.236750      15.616882       0.000000       0.346921       0.195500       0.174300       0.132500       0.828000
57031     57031     shaanxi        108.5500       34.8167          101       154     2012      09        18        262              0.229542      18.388733       1.571089       0.339222       0.187000       0.249100   -9999.000000       0.841000
57031     57031     shaanxi        108.5500       34.8167          101       154     2012      09        19        263              0.222333      18.974609       0.000000       0.334286       0.179000   -9999.000000       0.112200       0.584000
57031     57031     shaanxi        108.5500       34.8167          101       154     2012      09        20        264              0.218625      20.140289       3.180665       0.329527       0.214000       0.292100       0.128600   -9999.000000
57031     57031     shaanxi        108.5500       34.8167          101       154     2012      09        21        265              0.220292      17.694122       0.000000       0.337730   -9999.000000   -9999.000000       0.123500       0.762000
57031     57031     shaanxi        108.5500       34.8167          101       154     2012      09        22        266              0.217167      19.292816       0.000000       0.332207       0.162500       0.352400       0.119700       0.685000
57031     57031     shaanxi        108.5500       34.8167          101       154     2012      09        23        267              0.213417      19.557312       0.000000       0.329042       0.169000   -9999.000000   -9999.000000       0.720000
57031     57031     shaanxi        108.5500       34.8167          101       154     2012      09        24        268              0.209667      19.756866       2.142797       0.326900       0.169000   -9999.000000       0.124400       0.570000
57031     57031     shaanxi        108.5500       34.8167          101       154     2012      09        25        269              0.235417      19.520294      15.103287       0.327435       0.190000       0.109800       0.102900   -9999.000000
57031     57031     shaanxi        108.5500       34.8167          101       154     2012      09        26        270              0.242417      16.023071       0.000000       0.361630       0.179000   -9999.000000       0.120000       0.912000
57031     57031     shaanxi        108.5500       34.8167          101       154     2012      09        27        271              0.236500      16.748077       0.000000       0.343100       0.164500   -9999.000000       0.108200   -9999.000000
57031     57031     shaanxi        108.5500       34.8167          101       154     2012      09        28        272              0.223067      16.871063       0.129999       0.334510       0.163500   -9999.000000       0.102100       0.575000
57031     57031     shaanxi        108.5500       34.8167          101       154     2012      09        29        273              0.216875      14.803375       0.000000       0.329417       0.161000   -9999.000000   -9999.000000       0.532000
57031     57031     shaanxi        108.5500       34.8167          101       154     2012      09        30        274              0.210292      16.159210       0.000000       0.326221   -9999.000000   -9999.000000       0.103200   -9999.000000
57031     57031     shaanxi        108.5500       34.8167          101       154     2012      10        01        275              0.204000      16.894867       0.000000       0.323130       0.158000       0.276500       0.120100       0.608000
57031     57031     shaanxi        108.5500       34.8167          101       154     2012      10        02        276              0.200583      17.699402       2.526285       0.320124       0.171000   -9999.000000       0.134200   -9999.000000
57031     57031     shaanxi        108.5500       34.8167          101       154     2012      10        03        277              0.198833      16.014221       0.000000       0.328421       0.151500   -9999.000000       0.127600       0.584000
57031     57031     shaanxi        108.5500       34.8167          101       154     2012      10        04        278              0.195542      17.995514       1.058833       0.323207       0.167000   -9999.000000   -9999.000000   -9999.000000
57031     57031     shaanxi        108.5500       34.8167          101       154     2012      10        05        279              0.191750      16.046387       0.000000       0.321214       0.156000   -9999.000000   -9999.000000   -9999.000000
57031     57031     shaanxi        108.5500       34.8167          101       154     2012      10        06        280              0.187750      16.572174       0.000000       0.318702       0.160000       0.297300       0.118900       0.608000
57031     57031     shaanxi        108.5500       34.8167          101       154     2012      10        07        281              0.185875      15.128296       0.000000       0.317841       0.159000   -9999.000000       0.125200   -9999.000000
57031     57031     shaanxi        108.5500       34.8167          101       154     2012      10        08        282              0.185375      14.534454       2.267690       0.318190       0.183000       0.204600       0.105700       0.851000
57031     57031     shaanxi        108.5500       34.8167          101       154     2012      10        09        283              0.184625      13.879944       0.000000       0.325659       0.154500   -9999.000000       0.092400   -9999.000000
57031     57031     shaanxi        108.5500       34.8167          101       154     2012      10        10        284              0.180958      14.744781       0.000000       0.318216       0.152000   -9999.000000   -9999.000000       0.579000
57031     57031     shaanxi        108.5500       34.8167          101       154     2012      10        11        285              0.178625      15.669067       0.000000       0.314830   -9999.000000   -9999.000000       0.095600       0.639000
57031     57031     shaanxi        108.5500       34.8167          101       154     2012      10        12        286              0.176500      15.790436       0.000000       0.314171       0.131000   -9999.000000       0.081100   -9999.000000
57031     57031     shaanxi        108.5500       34.8167          101       154     2012      10        13        287              0.172792      15.501801       0.000000       0.314037       0.119500   -9999.000000       0.090700       0.540000
57031     57031     shaanxi        108.5500       34.8167          101       154     2012      10        14        288              0.169333      16.437195       0.000000       0.310105       0.124000   -9999.000000       0.089800   -9999.000000
57031     57031     shaanxi        108.5500       34.8167          101       154     2012      10        15        289              0.167542      14.882568       1.034292       0.309782       0.137000       0.378200       0.107200       0.552000
57031     57031     shaanxi        108.5500       34.8167          101       154     2012      10        16        290              0.164208      13.298157       0.810701       0.312162       0.126000       0.182200   -9999.000000       0.541000
57031     57031     shaanxi        108.5500       34.8167          101       154     2012      10        17        291              0.159417      11.089996       0.000000       0.309573       0.140000   -9999.000000       0.103700       0.666000
57031     57031     shaanxi        108.5500       34.8167          101       154     2012      10        18        292              0.157708      11.870880       0.519381       0.305591       0.134000   -9999.000000       0.112900       0.538000
57031     57031     shaanxi        108.5500       34.8167          101       154     2012      10        19        293              0.157375       9.803772       0.000000       0.309857       0.128500       0.018900       0.105000   -9999.000000
57031     57031     shaanxi        108.5500       34.8167          101       154     2012      10        20        294              0.155458      12.761993       0.000000       0.307830       0.136500   -9999.000000       0.107700       0.537000
57031     57031     shaanxi        108.5500       34.8167          101       154     2012      10        21        295              0.155000      15.148956       1.106000       0.305517       0.156000       0.214100   -9999.000000       0.606000
57031     57031     shaanxi        108.5500       34.8167          101       154     2012      10        22        296              0.154875       9.101013       0.000000       0.310907   -9999.000000   -9999.000000   -9999.000000       0.720000
57031     57031     shaanxi        108.5500       34.8167          101       154     2012      10        23        297              0.154750      10.470917       0.977764       0.305549   -9999.000000   -9999.000000       0.096800       0.505000
57031     57031     shaanxi        108.5500       34.8167          101       154     2012      10        24        298              0.154542       8.094513       0.000000       0.310506   -9999.000000       0.100200       0.108000   -9999.000000
57031     57031     shaanxi        108.5500       34.8167          101       154     2012      10        25        299              0.000000      10.271088       0.000000       0.306278       0.146500   -9999.000000       0.103600       0.475000
57031     57031     shaanxi        108.5500       34.8167          101       154     2012      10        26        300              0.151875      12.111084       0.000000       0.303700       0.144000   -9999.000000       0.105500   -9999.000000
57031     57031     shaanxi        108.5500       34.8167          101       154     2012      10        27        301              0.149333      13.081055       0.000000       0.301676   -9999.000000   -9999.000000   -9999.000000       0.510000
57031     57031     shaanxi        108.5500       34.8167          101       154     2012      10        28        302              0.000000      13.008148       0.310944       0.299762       0.161000   -9999.000000       0.103800       0.343000
57031     57031     shaanxi        108.5500       34.8167          101       154     2012      10        29        303              0.146875      12.214050       0.000000       0.300264       0.149500       0.040100       0.100300   -9999.000000
57031     57031     shaanxi        108.5500       34.8167          101       154     2012      10        30        304              0.143292      11.093872       0.000000       0.299282       0.138000   -9999.000000       0.111100       0.434000
57031     57031     shaanxi        108.5500       34.8167          101       154     2012      10        31        305              0.140042       9.666840       0.000000       0.296605       0.153000   -9999.000000       0.110300   -9999.000000
57031     57031     shaanxi        108.5500       34.8167          101       154     2012      11        01        306              0.137917       9.490417       0.000000       0.294990       0.130000   -9999.000000       0.109000       0.448000
57031     57031     shaanxi        108.5500       34.8167          101       154     2012      11        02        307              0.136708      10.047882       0.611579       0.294832   -9999.000000   -9999.000000   -9999.000000   -9999.000000
57031     57031     shaanxi        108.5500       34.8167          101       154     2012      11        03        308              0.134042      10.506989       0.000000       0.292968   -9999.000000   -9999.000000       0.107000   -9999.000000
57031     57031     shaanxi        108.5500       34.8167          101       154     2012      11        04        309              0.131417       4.566254       0.000000       0.282744       0.123000   -9999.000000       0.111200       0.349000
57031     57031     shaanxi        108.5500       34.8167          101       154     2012      11        05        310              0.129500       4.150665       0.000000       0.281058       0.130000   -9999.000000       0.091200   -9999.000000
57031     57031     shaanxi        108.5500       34.8167          101       154     2012      11        06        311              0.129292       5.310944       0.199822       0.286085       0.140000   -9999.000000       0.101700       0.389000
57031     57031     shaanxi        108.5500       34.8167          101       154     2012      11        07        312              0.129875       7.361023       0.000000       0.289691   -9999.000000   -9999.000000   -9999.000000   -9999.000000
57031     57031     shaanxi        108.5500       34.8167          101       154     2012      11        08        313              0.129000       5.331512       0.000000       0.291933       0.142000       0.357000   -9999.000000       0.392000
57031     57031     shaanxi        108.5500       34.8167          101       154     2012      11        09        314              0.129333       7.337646       0.300715       0.291175       0.148000   -9999.000000       0.090700       0.585000
57031     57031     shaanxi        108.5500       34.8167          101       154     2012      11        10        315              0.129333       5.831573       0.713690       0.294409       0.132000   -9999.000000       0.099300   -9999.000000
57031     57031     shaanxi        108.5500       34.8167          101       154     2012      11        11        316              0.127667       3.545135       0.751693       0.276700       0.131000       0.130000       0.097300       0.273000
57031     57031     shaanxi        108.5500       34.8167          101       154     2012      11        12        317              0.128208       4.347961       0.000000       0.281616       0.128000   -9999.000000       0.089900   -9999.000000
57031     57031     shaanxi        108.5500       34.8167          101       154     2012      11        13        318              0.000000       5.966827       0.000000       0.287984   -9999.000000   -9999.000000   -9999.000000       0.355000
57031     57031     shaanxi        108.5500       34.8167          101       154     2012      11        14        319              0.127792       6.357666       0.000000       0.287584       0.137000   -9999.000000       0.093800       0.390000
57031     57031     shaanxi        108.5500       34.8167          101       154     2012      11        15        320              0.128750       5.326111       0.107914       0.288663   -9999.000000   -9999.000000       0.084100       0.378000
57031     57031     shaanxi        108.5500       34.8167          101       154     2012      11        16        321              0.128583       3.058014       0.583581       0.290268       0.135000       0.158900       0.091700       0.251000
57031     57031     shaanxi        108.5500       34.8167          101       154     2012      11        17        322              0.000000       5.354401       0.000000       0.290266       0.131000   -9999.000000       0.091300   -9999.000000
57031     57031     shaanxi        108.5500       34.8167          101       154     2012      11        18        323              0.128458       7.131836       0.000000       0.289382   -9999.000000       0.127000       0.085600       0.269000
57031     57031     shaanxi        108.5500       34.8167          101       154     2012      11        19        324              0.128625       6.140106       0.000000       0.287925       0.136000   -9999.000000   -9999.000000       0.412000
57031     57031     shaanxi        108.5500       34.8167          101       154     2012      11        20        325              0.129000       5.822388       0.000000       0.287729       0.125500   -9999.000000       0.094000       0.442000
57031     57031     shaanxi        108.5500       34.8167          101       154     2012      11        21        326              0.129542       4.816132       0.000000       0.289340       0.114000       0.208700       0.100200       0.247000
57031     57031     shaanxi        108.5500       34.8167          101       154     2012      11        22        327              0.129042       6.702240       0.000000       0.289095       0.123000   -9999.000000       0.095600   -9999.000000
57031     57031     shaanxi        108.5500       34.8167          101       154     2012      11        23        328              0.127542       3.681519       0.000000       0.281323   -9999.000000   -9999.000000       0.094000       0.209000
57031     57031     shaanxi        108.5500       34.8167          101       154     2012      11        24        329              0.126583       3.365845       0.094509       0.268387   -9999.000000   -9999.000000   -9999.000000   -9999.000000
57031     57031     shaanxi        108.5500       34.8167          101       154     2012      11        25        330              0.127000       2.818909       0.145854       0.276648       0.124000   -9999.000000       0.097600       0.296000
57031     57031     shaanxi        108.5500       34.8167          101       154     2012      11        26        331              0.127417       1.751526       0.730803       0.258433       0.111000       0.277500   -9999.000000       0.193000
57031     57031     shaanxi        108.5500       34.8167          101       154     2012      11        27        332              0.127792       1.993622       0.196060       0.253006       0.124000   -9999.000000       0.077200   -9999.000000
57031     57031     shaanxi        108.5500       34.8167          101       154     2012      11        28        333              0.128000       2.921417       0.000000       0.264855       0.124000   -9999.000000       0.076800       0.108000
57031     57031     shaanxi        108.5500       34.8167          101       154     2012      11        29        334              0.127917       1.034271       0.000000       0.238490   -9999.000000       0.152200       0.077700   -9999.000000
57031     57031     shaanxi        108.5500       34.8167          101       154     2012      11        30        335              0.127333      -0.073364       1.318497       0.220467   -9999.000000   -9999.000000   -9999.000000       0.235000
57031     57031     shaanxi        108.5500       34.8167          101       154     2012      12        01        336              0.128625       0.929291       0.148764       0.237934       0.118000   -9999.000000       0.075200   -9999.000000
57031     57031     shaanxi        108.5500       34.8167          101       154     2012      12        02        337              0.129625       1.385925       0.000000       0.245459       0.132000   -9999.000000       0.078500   -9999.000000
57031     57031     shaanxi        108.5500       34.8167          101       154     2012      12        03        338              0.129792       2.093079       0.000000       0.254326       0.126000   -9999.000000       0.076400       0.169000
57031     57031     shaanxi        108.5500       34.8167          101       154     2012      12        04        339              0.129792       2.178986       0.000000       0.250742   -9999.000000       0.149900       0.081900   -9999.000000
57031     57031     shaanxi        108.5500       34.8167          101       154     2012      12        05        340              0.130292       2.955597       0.000000       0.261808   -9999.000000   -9999.000000   -9999.000000       0.126000
57031     57031     shaanxi        108.5500       34.8167          101       154     2012      12        06        341              0.130000       2.494659       0.000000       0.251075       0.114000   -9999.000000   -9999.000000   -9999.000000
57031     57031     shaanxi        108.5500       34.8167          101       154     2012      12        07        342              0.130417       2.964355       0.000000       0.262172       0.111000   -9999.000000       0.060800       0.175000
57031     57031     shaanxi        108.5500       34.8167          101       154     2012      12        08        343              0.129667       3.117828       0.000000       0.260264       0.125000   -9999.000000       0.074500       0.006000
57031     57031     shaanxi        108.5500       34.8167          101       154     2012      12        09        344              0.128167       0.906952       0.000000       0.230107       0.129000       0.196000       0.070500   -9999.000000
57031     57031     shaanxi        108.5500       34.8167          101       154     2012      12        10        345              0.126958       0.203094       0.000000       0.218742   -9999.000000   -9999.000000       0.078000       0.094000
57031     57031     shaanxi        108.5500       34.8167          101       154     2012      12        11        346              0.125833       1.059540       0.000000       0.232472   -9999.000000   -9999.000000   -9999.000000   -9999.000000
57031     57031     shaanxi        108.5500       34.8167          101       154     2012      12        12        347              0.124583      -0.029358       0.000000       0.217417       0.101000   -9999.000000       0.085000       0.073000
57031     57031     shaanxi        108.5500       34.8167          101       154     2012      12        13        348              0.125667      -0.026154       0.000000       0.213485   -9999.000000   -9999.000000       0.067500       0.078000
57031     57031     shaanxi        108.5500       34.8167          101       154     2012      12        14        349              0.126417      -0.848358      15.310203       0.197813       0.121000       0.206100       0.082900       0.210000
57031     57031     shaanxi        108.5500       34.8167          101       154     2012      12        15        350              0.000000       0.149963      26.881516       0.217604   -9999.000000   -9999.000000       0.084100       0.085000
57031     57031     shaanxi        108.5500       34.8167          101       154     2012      12        16        351              0.127792      -0.330963       0.147786       0.206869   -9999.000000   -9999.000000       0.079700   -9999.000000
57031     57031     shaanxi        108.5500       34.8167          101       154     2012      12        17        352              0.128708       0.583893      43.336700       0.228599       0.107000       0.093700   -9999.000000       0.089000
57031     57031     shaanxi        108.5500       34.8167          101       154     2012      12        18        353              0.128208       0.374115       0.000000       0.227555       0.100000   -9999.000000       0.080900       0.045000
57031     57031     shaanxi        108.5500       34.8167          101       154     2012      12        19        354              0.128000       0.058746       0.000000       0.217650       0.118000       0.353200       0.082000       0.120000
57031     57031     shaanxi        108.5500       34.8167          101       154     2012      12        20        355              0.000000      -0.189484       0.802736       0.212716   -9999.000000   -9999.000000       0.076200       0.008000
57031     57031     shaanxi        108.5500       34.8167          101       154     2012      12        21        356              0.128000      -1.524872       0.104749       0.191666   -9999.000000   -9999.000000       0.079500   -9999.000000
57031     57031     shaanxi        108.5500       34.8167          101       154     2012      12        22        357              0.127792      -1.761749       0.000000       0.187799   -9999.000000       0.220100   -9999.000000       0.041000
57031     57031     shaanxi        108.5500       34.8167          101       154     2012      12        23        358              0.123333      -4.084076       0.000000       0.170472       0.087000   -9999.000000   -9999.000000   -9999.000000
57031     57031     shaanxi        108.5500       34.8167          101       154     2012      12        24        359              0.111167      -5.120911       0.000000       0.160370       0.103000       0.662000       0.057800       0.045000
57031     57031     shaanxi        108.5500       34.8167          101       154     2012      12        25        360              0.097375      -2.935120       0.000000       0.179252       0.098000   -9999.000000       0.076600       0.014000
57031     57031     shaanxi        108.5500       34.8167          101       154     2012      12        26        361              0.000000      -2.878479       0.000000       0.179349   -9999.000000   -9999.000000       0.075800   -9999.000000
57031     57031     shaanxi        108.5500       34.8167          101       154     2012      12        27        362              0.077700      -3.971588       0.000000       0.167243   -9999.000000       0.440200       0.075000       0.033000
57031     57031     shaanxi        108.5500       34.8167          101       154     2012      12        28        363              0.000000      -3.127716       0.257349       0.175890   -9999.000000   -9999.000000   -9999.000000   -9999.000000
57031     57031     shaanxi        108.5500       34.8167          101       154     2012      12        29        364              0.000000      -3.740417       0.000000       0.167193   -9999.000000   -9999.000000       0.069500       0.007000
57031     57031     shaanxi        108.5500       34.8167          101       154     2012      12        30        365              0.000000      -6.854187       0.000000       0.154149       0.092000   -9999.000000       0.067300   -9999.000000
57031     57031     shaanxi        108.5500       34.8167          101       154     2012      12        31        366              0.059200      -4.211853       0.000000       0.166442   -9999.000000   -9999.000000       0.070400   -9999.000000
