# Supplementary material for: Research on Fusing Multisatellite Soil Moisture Data Based on Bayesian Model Averaging
Source: Hindawi journal article supplement (doi:10.1155/2018/9310838), 2018-06-25
Supplement: f1 [file 9310838.f1.zip › 2012_sm00-10cm_daily_ZDB_ZHY_57032_366days_allin.txt]

57032     57032     shaanxi        108.2000       34.1333          103       153     2012      01        01        001              0.000000   -9999.000000       8.351266   -9999.000000   -9999.000000   -9999.000000       0.062600   -9999.000000
57032     57032     shaanxi        108.2000       34.1333          103       153     2012      01        02        002              0.221625       0.168671       0.000000       0.219313       0.112000   -9999.000000   -9999.000000       0.161000
57032     57032     shaanxi        108.2000       34.1333          103       153     2012      01        03        003              0.000000       1.153290       0.000000       0.235483   -9999.000000   -9999.000000       0.062500   -9999.000000
57032     57032     shaanxi        108.2000       34.1333          103       153     2012      01        04        004              0.214130       0.203674       0.000000       0.225609   -9999.000000   -9999.000000       0.056000       0.015000
57032     57032     shaanxi        108.2000       34.1333          103       153     2012      01        05        005              0.208833      -1.274719       0.000000       0.201278   -9999.000000   -9999.000000       0.064700   -9999.000000
57032     57032     shaanxi        108.2000       34.1333          103       153     2012      01        06        006              0.208167      -1.482941       0.000000       0.192601   -9999.000000   -9999.000000       0.075300       0.150000
57032     57032     shaanxi        108.2000       34.1333          103       153     2012      01        07        007              0.213542      -0.128510       0.000000       0.212676   -9999.000000   -9999.000000   -9999.000000       0.078000
57032     57032     shaanxi        108.2000       34.1333          103       153     2012      01        08        008              0.000000      -0.383362       0.654823       0.209592   -9999.000000   -9999.000000   -9999.000000   -9999.000000
57032     57032     shaanxi        108.2000       34.1333          103       153     2012      01        09        009              0.212417       0.347382      22.519459       0.222199   -9999.000000   -9999.000000   -9999.000000       0.061000
57032     57032     shaanxi        108.2000       34.1333          103       153     2012      01        10        010              0.211833       0.745941      32.859810       0.227751   -9999.000000   -9999.000000       0.048000   -9999.000000
57032     57032     shaanxi        108.2000       34.1333          103       153     2012      01        11        011              0.210792       0.175690       0.627165       0.222476   -9999.000000   -9999.000000       0.052000       0.056000
57032     57032     shaanxi        108.2000       34.1333          103       153     2012      01        12        012              0.210292       0.172852       0.000000       0.220907   -9999.000000   -9999.000000       0.054800   -9999.000000
57032     57032     shaanxi        108.2000       34.1333          103       153     2012      01        13        013              0.210375       0.352081       0.000000       0.224078       0.108000   -9999.000000   -9999.000000   -9999.000000
57032     57032     shaanxi        108.2000       34.1333          103       153     2012      01        14        014              0.209667       0.520935       0.000000       0.230750   -9999.000000   -9999.000000       0.048600       0.086000
57032     57032     shaanxi        108.2000       34.1333          103       153     2012      01        15        015              0.207875       1.061798       0.000000       0.239112   -9999.000000   -9999.000000       0.033400   -9999.000000
57032     57032     shaanxi        108.2000       34.1333          103       153     2012      01        16        016              0.207958       0.604492       0.000000       0.230497   -9999.000000   -9999.000000       0.037600       0.118000
57032     57032     shaanxi        108.2000       34.1333          103       153     2012      01        17        017              0.000000       0.273102       0.412957       0.227090       0.110000   -9999.000000       0.044300   -9999.000000
57032     57032     shaanxi        108.2000       34.1333          103       153     2012      01        18        018              0.207875       1.148407       1.998945       0.242513   -9999.000000   -9999.000000       0.044000   -9999.000000
57032     57032     shaanxi        108.2000       34.1333          103       153     2012      01        19        019              0.208000       0.085297       0.000000       0.223267   -9999.000000   -9999.000000   -9999.000000       0.226000
57032     57032     shaanxi        108.2000       34.1333          103       153     2012      01        20        020              0.213083       0.501923       0.532688       0.235196   -9999.000000   -9999.000000       0.039800   -9999.000000
57032     57032     shaanxi        108.2000       34.1333          103       153     2012      01        21        021              0.218875       0.497925       0.000000       0.240529   -9999.000000   -9999.000000       0.032500       0.308000
57032     57032     shaanxi        108.2000       34.1333          103       153     2012      01        22        022              0.223083      -0.189453       1.405716       0.220681       0.111000   -9999.000000       0.031200   -9999.000000
57032     57032     shaanxi        108.2000       34.1333          103       153     2012      01        23        023              0.223500      -2.374573       0.491579       0.184159   -9999.000000   -9999.000000       0.035700       0.004000
57032     57032     shaanxi        108.2000       34.1333          103       153     2012      01        24        024              0.221833      -3.029968       0.575881       0.174887   -9999.000000   -9999.000000   -9999.000000       0.104000
57032     57032     shaanxi        108.2000       34.1333          103       153     2012      01        25        025              0.220042      -3.741852       0.240140       0.172324   -9999.000000   -9999.000000   -9999.000000   -9999.000000
57032     57032     shaanxi        108.2000       34.1333          103       153     2012      01        26        026              0.226250      -3.084595       0.362208       0.177630   -9999.000000   -9999.000000       0.018800       0.043000
57032     57032     shaanxi        108.2000       34.1333          103       153     2012      01        27        027              0.242333      -2.118469       0.000000       0.184463       0.096000   -9999.000000       0.022800   -9999.000000
57032     57032     shaanxi        108.2000       34.1333          103       153     2012      01        28        028              0.259167      -0.414459       0.000000       0.209596   -9999.000000       0.068000       0.037600       0.203000
57032     57032     shaanxi        108.2000       34.1333          103       153     2012      01        29        029              0.255167       0.995880       0.166084       0.233606   -9999.000000   -9999.000000       0.038700       0.235000
57032     57032     shaanxi        108.2000       34.1333          103       153     2012      01        30        030              0.250917       1.198608       0.302491       0.240731   -9999.000000   -9999.000000   -9999.000000       0.380000
57032     57032     shaanxi        108.2000       34.1333          103       153     2012      01        31        031              0.247958       1.491699       0.466526       0.242219   -9999.000000   -9999.000000       0.043100       0.422000
57032     57032     shaanxi        108.2000       34.1333          103       153     2012      02        01        032              0.246000       2.615295       0.000000       0.257967   -9999.000000   -9999.000000       0.023900   -9999.000000
57032     57032     shaanxi        108.2000       34.1333          103       153     2012      02        02        033              0.242458       1.987610       0.000000       0.251898   -9999.000000   -9999.000000       0.038400       0.119000
57032     57032     shaanxi        108.2000       34.1333          103       153     2012      02        03        034              0.239500       0.490906       0.000000       0.229847   -9999.000000   -9999.000000       0.055300       0.240000
57032     57032     shaanxi        108.2000       34.1333          103       153     2012      02        04        035              0.238583       1.518036       0.000000       0.241866   -9999.000000   -9999.000000       0.054000       0.429000
57032     57032     shaanxi        108.2000       34.1333          103       153     2012      02        05        036              0.236875       1.849060       0.000000       0.251190   -9999.000000   -9999.000000   -9999.000000       0.081000
57032     57032     shaanxi        108.2000       34.1333          103       153     2012      02        06        037              0.234917       3.044281       0.000000       0.266144   -9999.000000   -9999.000000       0.052000   -9999.000000
57032     57032     shaanxi        108.2000       34.1333          103       153     2012      02        07        038              0.231458       2.666443       0.000000       0.255528   -9999.000000   -9999.000000       0.043600       0.056000
57032     57032     shaanxi        108.2000       34.1333          103       153     2012      02        08        039              0.229208       0.135315       0.000000       0.222355   -9999.000000   -9999.000000       0.053200   -9999.000000
57032     57032     shaanxi        108.2000       34.1333          103       153     2012      02        09        040              0.227708      -0.026581       0.000000       0.216010   -9999.000000   -9999.000000       0.056400       0.217000
57032     57032     shaanxi        108.2000       34.1333          103       153     2012      02        10        041              0.225917       0.350250       0.000000       0.221046   -9999.000000   -9999.000000   -9999.000000   -9999.000000
57032     57032     shaanxi        108.2000       34.1333          103       153     2012      02        11        042              0.222917       1.134491       0.000000       0.231628       0.100000   -9999.000000   -9999.000000   -9999.000000
57032     57032     shaanxi        108.2000       34.1333          103       153     2012      02        12        043              0.222667       1.826599       0.000000       0.239697   -9999.000000   -9999.000000   -9999.000000       0.129000
57032     57032     shaanxi        108.2000       34.1333          103       153     2012      02        13        044              0.221583       2.670593       0.000000       0.256194   -9999.000000   -9999.000000       0.035800   -9999.000000
57032     57032     shaanxi        108.2000       34.1333          103       153     2012      02        14        045              0.220958       2.659485       0.000000       0.260022   -9999.000000   -9999.000000   -9999.000000       0.230000
57032     57032     shaanxi        108.2000       34.1333          103       153     2012      02        15        046              0.220000       4.412903       0.000000       0.271301   -9999.000000   -9999.000000       0.056900   -9999.000000
57032     57032     shaanxi        108.2000       34.1333          103       153     2012      02        16        047              0.219250       3.101135       0.000000       0.273265       0.106000   -9999.000000   -9999.000000   -9999.000000
57032     57032     shaanxi        108.2000       34.1333          103       153     2012      02        17        048              0.217542       3.279999       0.000000       0.264355       0.102000   -9999.000000       0.046500       0.171000
57032     57032     shaanxi        108.2000       34.1333          103       153     2012      02        18        049              0.215542       1.906555       0.000000       0.250160       0.114000   -9999.000000       0.029800   -9999.000000
57032     57032     shaanxi        108.2000       34.1333          103       153     2012      02        19        050              0.213625       2.245880       0.000000       0.244130       0.109000   -9999.000000       0.045500       0.232000
57032     57032     shaanxi        108.2000       34.1333          103       153     2012      02        20        051              0.212458       3.430084       0.000000       0.257093   -9999.000000   -9999.000000       0.051800   -9999.000000
57032     57032     shaanxi        108.2000       34.1333          103       153     2012      02        21        052              0.211167       4.224060       0.000000       0.265292   -9999.000000   -9999.000000   -9999.000000       0.096000
57032     57032     shaanxi        108.2000       34.1333          103       153     2012      02        22        053              0.210333       4.565186       0.000000       0.268174       0.090000   -9999.000000   -9999.000000       0.262000
57032     57032     shaanxi        108.2000       34.1333          103       153     2012      02        23        054              0.209375       5.953003       0.000000       0.271902       0.102500   -9999.000000       0.050400   -9999.000000
57032     57032     shaanxi        108.2000       34.1333          103       153     2012      02        24        055              0.208333       3.779388       0.000000       0.271670       0.099000   -9999.000000       0.047300       0.183000
57032     57032     shaanxi        108.2000       34.1333          103       153     2012      02        25        056              0.207750       4.431519       0.000000       0.270076   -9999.000000   -9999.000000       0.056200   -9999.000000
57032     57032     shaanxi        108.2000       34.1333          103       153     2012      02        26        057              0.209042       2.416626       0.648862       0.263468   -9999.000000   -9999.000000       0.055900       0.408000
57032     57032     shaanxi        108.2000       34.1333          103       153     2012      02        27        058              0.208083       2.427551       0.000000       0.263385   -9999.000000   -9999.000000   -9999.000000       0.162000
57032     57032     shaanxi        108.2000       34.1333          103       153     2012      02        28        059              0.208042       2.069641       0.000000       0.257601       0.090000   -9999.000000   -9999.000000       0.235000
57032     57032     shaanxi        108.2000       34.1333          103       153     2012      02        29        060              0.000000   -9999.000000       0.044627   -9999.000000       0.100000   -9999.000000   -9999.000000   -9999.000000
57032     57032     shaanxi        108.2000       34.1333          103       153     2012      03        01        061              0.212583       2.830414       0.212106       0.265837   -9999.000000   -9999.000000       0.052400   -9999.000000
57032     57032     shaanxi        108.2000       34.1333          103       153     2012      03        02        062              0.213542       3.445648       0.000000       0.274125   -9999.000000   -9999.000000       0.050900       0.386000
57032     57032     shaanxi        108.2000       34.1333          103       153     2012      03        03        063              0.212667       3.311951       0.000000       0.275081   -9999.000000   -9999.000000       0.050500       0.337000
57032     57032     shaanxi        108.2000       34.1333          103       153     2012      03        04        064              0.211625       2.950928       0.000000       0.271713       0.115000   -9999.000000   -9999.000000       0.193000
57032     57032     shaanxi        108.2000       34.1333          103       153     2012      03        05        065              0.210333       2.675140       0.000000       0.269801       0.128000   -9999.000000       0.055400       0.026000
57032     57032     shaanxi        108.2000       34.1333          103       153     2012      03        06        066              0.208750       4.725983       0.000000       0.273508       0.122000   -9999.000000       0.035700   -9999.000000
57032     57032     shaanxi        108.2000       34.1333          103       153     2012      03        07        067              0.000000       4.832031       0.121774       0.271955   -9999.000000   -9999.000000       0.057200       0.112000
57032     57032     shaanxi        108.2000       34.1333          103       153     2012      03        08        068              0.208542       5.297577       0.197614       0.272254   -9999.000000   -9999.000000       0.065000   -9999.000000
57032     57032     shaanxi        108.2000       34.1333          103       153     2012      03        09        069              0.211083       4.296234       0.000000       0.275416       0.130000   -9999.000000       0.059800       0.281000
57032     57032     shaanxi        108.2000       34.1333          103       153     2012      03        10        070              0.209167       5.669556       0.000000       0.274029       0.125000   -9999.000000   -9999.000000   -9999.000000
57032     57032     shaanxi        108.2000       34.1333          103       153     2012      03        11        071              0.205333       8.907776       0.000000       0.269993       0.101000   -9999.000000       0.053400   -9999.000000
57032     57032     shaanxi        108.2000       34.1333          103       153     2012      03        12        072              0.201375       8.146362       0.000000       0.266300   -9999.000000   -9999.000000       0.057500       0.182000
57032     57032     shaanxi        108.2000       34.1333          103       153     2012      03        13        073              0.197792       7.921265       0.000000       0.264857       0.099000   -9999.000000       0.056800   -9999.000000
57032     57032     shaanxi        108.2000       34.1333          103       153     2012      03        14        074              0.194875      10.514709       0.000000       0.261970       0.096000   -9999.000000   -9999.000000       0.192000
57032     57032     shaanxi        108.2000       34.1333          103       153     2012      03        15        075              0.194458      10.721863       0.000000       0.260850       0.119500   -9999.000000   -9999.000000   -9999.000000
57032     57032     shaanxi        108.2000       34.1333          103       153     2012      03        16        076              0.194042       7.229584       0.000000       0.263905       0.103000   -9999.000000   -9999.000000   -9999.000000
57032     57032     shaanxi        108.2000       34.1333          103       153     2012      03        17        077              0.189667      11.281586       0.000000       0.261350   -9999.000000       0.078900       0.044900       0.210000
57032     57032     shaanxi        108.2000       34.1333          103       153     2012      03        18        078              0.183708      13.459503       0.000000       0.257318       0.099000   -9999.000000       0.056400   -9999.000000
57032     57032     shaanxi        108.2000       34.1333          103       153     2012      03        19        079              0.177250      14.043091       0.000000       0.252087       0.097000   -9999.000000       0.073000       0.102000
57032     57032     shaanxi        108.2000       34.1333          103       153     2012      03        20        080              0.174458       8.648010       0.000000       0.253108       0.100000   -9999.000000       0.075500   -9999.000000
57032     57032     shaanxi        108.2000       34.1333          103       153     2012      03        21        081              0.173000       7.948669       0.030514       0.254961       0.163000   -9999.000000   -9999.000000       0.007000
57032     57032     shaanxi        108.2000       34.1333          103       153     2012      03        22        082              0.173125       5.906158       0.000000       0.257591   -9999.000000   -9999.000000       0.071200       0.197000
57032     57032     shaanxi        108.2000       34.1333          103       153     2012      03        23        083              0.167833       6.971588       0.000000       0.258689   -9999.000000   -9999.000000       0.052100   -9999.000000
57032     57032     shaanxi        108.2000       34.1333          103       153     2012      03        24        084              0.158833       9.824951       0.000000       0.251022       0.125000   -9999.000000       0.068400       0.098000
57032     57032     shaanxi        108.2000       34.1333          103       153     2012      03        25        085              0.000000      12.130646       0.000000       0.244845       0.123000   -9999.000000       0.069900   -9999.000000
57032     57032     shaanxi        108.2000       34.1333          103       153     2012      03        26        086              0.140958      13.997681       0.000000       0.240254       0.125000   -9999.000000       0.071200       0.033000
57032     57032     shaanxi        108.2000       34.1333          103       153     2012      03        27        087              0.134500      15.186401       0.000000       0.235683       0.128000   -9999.000000   -9999.000000       0.226000
57032     57032     shaanxi        108.2000       34.1333          103       153     2012      03        28        088              0.134208      15.794067       0.250240       0.232387       0.166000   -9999.000000       0.076900       0.171000
57032     57032     shaanxi        108.2000       34.1333          103       153     2012      03        29        089              0.131917      11.961975       0.000000       0.238792       0.135000   -9999.000000       0.071700       0.009000
57032     57032     shaanxi        108.2000       34.1333          103       153     2012      03        30        090              0.123542      16.609528       0.436125       0.235399       0.138000   -9999.000000       0.069500   -9999.000000
57032     57032     shaanxi        108.2000       34.1333          103       153     2012      03        31        091              0.113042      13.943909       0.787368       0.229758       0.134000   -9999.000000       0.071900       0.045000
57032     57032     shaanxi        108.2000       34.1333          103       153     2012      04        01        092              0.104208      16.056732       0.000000       0.221813       0.146000   -9999.000000   -9999.000000       0.142000
57032     57032     shaanxi        108.2000       34.1333          103       153     2012      04        02        093              0.097208      17.800842       0.286642       0.218058       0.145000   -9999.000000   -9999.000000       0.076000
57032     57032     shaanxi        108.2000       34.1333          103       153     2012      04        03        094              0.089958      15.135071       0.000000       0.216094       0.142000   -9999.000000       0.063500   -9999.000000
57032     57032     shaanxi        108.2000       34.1333          103       153     2012      04        04        095              0.083583      15.689056       0.000000       0.211610       0.136000   -9999.000000       0.085600   -9999.000000
57032     57032     shaanxi        108.2000       34.1333          103       153     2012      04        05        096              0.078000      18.284882       0.000000       0.206457       0.134500   -9999.000000       0.082900       0.162000
57032     57032     shaanxi        108.2000       34.1333          103       153     2012      04        06        097              0.074250      17.080902       0.000000       0.202932       0.170000   -9999.000000       0.084900   -9999.000000
57032     57032     shaanxi        108.2000       34.1333          103       153     2012      04        07        098              0.070625      17.509674       0.000000       0.200607   -9999.000000   -9999.000000   -9999.000000       0.097000
57032     57032     shaanxi        108.2000       34.1333          103       153     2012      04        08        099              0.067208      18.851654       0.176347       0.197337       0.147000   -9999.000000       0.084200   -9999.000000
57032     57032     shaanxi        108.2000       34.1333          103       153     2012      04        09        100              0.065292      20.767731       0.078261       0.193583       0.147500   -9999.000000       0.102400   -9999.000000
57032     57032     shaanxi        108.2000       34.1333          103       153     2012      04        10        101              0.063125      18.478516       0.000000       0.195353       0.135000   -9999.000000       0.117700       0.008000
57032     57032     shaanxi        108.2000       34.1333          103       153     2012      04        11        102              0.061292      20.939178       2.328263       0.192158       0.174000   -9999.000000       0.127700   -9999.000000
57032     57032     shaanxi        108.2000       34.1333          103       153     2012      04        12        103              0.059500      19.199829       1.140233       0.195632   -9999.000000   -9999.000000   -9999.000000       0.094000
57032     57032     shaanxi        108.2000       34.1333          103       153     2012      04        13        104              0.058583      14.502991       0.000000       0.218599       0.185000   -9999.000000   -9999.000000   -9999.000000
57032     57032     shaanxi        108.2000       34.1333          103       153     2012      04        14        105              0.057292      17.845795       0.000000       0.204277       0.163500   -9999.000000       0.111000   -9999.000000
57032     57032     shaanxi        108.2000       34.1333          103       153     2012      04        15        106              0.056167      18.575928       0.000000       0.196670       0.159500   -9999.000000       0.117400       0.039000
57032     57032     shaanxi        108.2000       34.1333          103       153     2012      04        16        107              0.055167      20.934753       1.499622       0.189278       0.178000   -9999.000000       0.146400   -9999.000000
57032     57032     shaanxi        108.2000       34.1333          103       153     2012      04        17        108              0.053750      22.007812       0.000000       0.196332       0.195000   -9999.000000       0.156600       0.017000
57032     57032     shaanxi        108.2000       34.1333          103       153     2012      04        18        109              0.053125      19.176422       0.616182       0.202374       0.174000   -9999.000000   -9999.000000   -9999.000000
57032     57032     shaanxi        108.2000       34.1333          103       153     2012      04        19        110              0.051958      21.537323       1.058777       0.191671       0.197000   -9999.000000       0.148300       0.069000
57032     57032     shaanxi        108.2000       34.1333          103       153     2012      04        20        111              0.051708      18.427887       0.000000       0.196936       0.164000   -9999.000000       0.111300       0.026000
57032     57032     shaanxi        108.2000       34.1333          103       153     2012      04        21        112              0.050875      20.674072       0.076009       0.193032       0.219000   -9999.000000       0.146300   -9999.000000
57032     57032     shaanxi        108.2000       34.1333          103       153     2012      04        22        113              0.050375      22.824158       0.000000       0.182976       0.200000   -9999.000000   -9999.000000       0.023000
57032     57032     shaanxi        108.2000       34.1333          103       153     2012      04        23        114              0.049083      24.357147       1.272583       0.177377   -9999.000000   -9999.000000       0.141600   -9999.000000
57032     57032     shaanxi        108.2000       34.1333          103       153     2012      04        24        115              0.049250      21.909821       0.000000       0.185166       0.258000   -9999.000000   -9999.000000       0.356000
57032     57032     shaanxi        108.2000       34.1333          103       153     2012      04        25        116              0.000000      19.505310       0.000000       0.188781       0.203500   -9999.000000       0.146900       0.034000
57032     57032     shaanxi        108.2000       34.1333          103       153     2012      04        26        117              0.049208      20.500275       0.000000       0.177022       0.208500   -9999.000000       0.128900       0.088000
57032     57032     shaanxi        108.2000       34.1333          103       153     2012      04        27        118              0.048708      23.901794       0.000000       0.171276       0.203000   -9999.000000       0.135000       0.026000
57032     57032     shaanxi        108.2000       34.1333          103       153     2012      04        28        119              0.047833      26.178436       6.511718       0.168703   -9999.000000   -9999.000000       0.139200   -9999.000000
57032     57032     shaanxi        108.2000       34.1333          103       153     2012      04        29        120              0.047125      25.614960       0.000000       0.216661       0.231000   -9999.000000   -9999.000000       0.094000
57032     57032     shaanxi        108.2000       34.1333          103       153     2012      04        30        121              0.045958      24.231018       0.000000       0.227451       0.234500   -9999.000000   -9999.000000       0.332000
57032     57032     shaanxi        108.2000       34.1333          103       153     2012      05        01        122              0.048333      21.284180       0.000000       0.210710       0.257500   -9999.000000       0.146500       0.333000
57032     57032     shaanxi        108.2000       34.1333          103       153     2012      05        02        123              0.050542      19.649658       1.626510       0.205825       0.265000   -9999.000000       0.172200       0.524000
57032     57032     shaanxi        108.2000       34.1333          103       153     2012      05        03        124              0.053750      19.581024       0.286841       0.217528       0.263000   -9999.000000       0.160100   -9999.000000
57032     57032     shaanxi        108.2000       34.1333          103       153     2012      05        04        125              0.056208      20.724396       0.000000       0.217470       0.230000   -9999.000000       0.149100       0.227000
57032     57032     shaanxi        108.2000       34.1333          103       153     2012      05        05        126              0.056333      23.468292       0.000000       0.202357       0.201500   -9999.000000   -9999.000000   -9999.000000
57032     57032     shaanxi        108.2000       34.1333          103       153     2012      05        06        127              0.054958      26.025940       0.000000       0.186367       0.204000   -9999.000000       0.146900       0.160000
57032     57032     shaanxi        108.2000       34.1333          103       153     2012      05        07        128              0.054500      25.543884       0.503275       0.178692   -9999.000000   -9999.000000       0.102300   -9999.000000
57032     57032     shaanxi        108.2000       34.1333          103       153     2012      05        08        129              0.054167      25.327820       0.784128       0.176191       0.201000   -9999.000000       0.126700   -9999.000000
57032     57032     shaanxi        108.2000       34.1333          103       153     2012      05        09        130              0.053333      28.948669       0.000000       0.170786   -9999.000000   -9999.000000       0.127100       0.223000
57032     57032     shaanxi        108.2000       34.1333          103       153     2012      05        10        131              0.056875      27.464600      13.981789       0.168669   -9999.000000   -9999.000000       0.129000   -9999.000000
57032     57032     shaanxi        108.2000       34.1333          103       153     2012      05        11        132              0.111083      28.594299       0.218032       0.199834       0.252500   -9999.000000   -9999.000000       0.536000
57032     57032     shaanxi        108.2000       34.1333          103       153     2012      05        12        133              0.102708      22.066315       0.000000       0.280923       0.236000   -9999.000000       0.133700   -9999.000000
57032     57032     shaanxi        108.2000       34.1333          103       153     2012      05        13        134              0.093167      20.565338       1.183742       0.244001   -9999.000000   -9999.000000       0.133900   -9999.000000
57032     57032     shaanxi        108.2000       34.1333          103       153     2012      05        14        135              0.085542      18.594971       0.000000       0.240668   -9999.000000   -9999.000000       0.136100       0.283000
57032     57032     shaanxi        108.2000       34.1333          103       153     2012      05        15        136              0.072583      21.863800       0.256013       0.223768       0.216000   -9999.000000       0.137100   -9999.000000
57032     57032     shaanxi        108.2000       34.1333          103       153     2012      05        16        137              0.063000      23.256470       0.000000       0.202850       0.196000   -9999.000000   -9999.000000       0.342000
57032     57032     shaanxi        108.2000       34.1333          103       153     2012      05        17        138              0.057250      25.041199       0.000000       0.187737       0.198000   -9999.000000   -9999.000000   -9999.000000
57032     57032     shaanxi        108.2000       34.1333          103       153     2012      05        18        139              0.054208      25.758270       0.000000       0.178777       0.209000   -9999.000000       0.114000       0.194000
57032     57032     shaanxi        108.2000       34.1333          103       153     2012      05        19        140              0.051625      27.594604       0.245701       0.173801   -9999.000000   -9999.000000       0.130400       0.305000
57032     57032     shaanxi        108.2000       34.1333          103       153     2012      05        20        141              0.050083      29.262512       0.291738       0.170279   -9999.000000   -9999.000000       0.131500   -9999.000000
57032     57032     shaanxi        108.2000       34.1333          103       153     2012      05        21        142              0.175583      28.107727      24.371353       0.170457       0.298000   -9999.000000       0.196600       0.778000
57032     57032     shaanxi        108.2000       34.1333          103       153     2012      05        22        143              0.239000      19.759125       0.600179       0.331065       0.258000   -9999.000000   -9999.000000   -9999.000000
57032     57032     shaanxi        108.2000       34.1333          103       153     2012      05        23        144              0.215250      20.476929       0.000000       0.294784   -9999.000000   -9999.000000       0.170800       0.586000
57032     57032     shaanxi        108.2000       34.1333          103       153     2012      05        24        145              0.200583      20.003143       0.159648       0.276143       0.260000   -9999.000000       0.131200       0.450000
57032     57032     shaanxi        108.2000       34.1333          103       153     2012      05        25        146              0.000000      19.127502       0.000000       0.266637       0.233000   -9999.000000       0.157600       0.606000
57032     57032     shaanxi        108.2000       34.1333          103       153     2012      05        26        147              0.157917      22.374115       0.472571       0.251204   -9999.000000   -9999.000000       0.153200       0.527000
57032     57032     shaanxi        108.2000       34.1333          103       153     2012      05        27        148              0.137125      25.360962       0.000000       0.233681       0.213000   -9999.000000       0.150800   -9999.000000
57032     57032     shaanxi        108.2000       34.1333          103       153     2012      05        28        149              0.152417      26.951752      19.954947       0.220272   -9999.000000   -9999.000000   -9999.000000       0.795000
57032     57032     shaanxi        108.2000       34.1333          103       153     2012      05        29        150              0.190458      21.058075       0.000000       0.296201       0.232000   -9999.000000       0.154100       0.458000
57032     57032     shaanxi        108.2000       34.1333          103       153     2012      05        30        151              0.162417      23.291779       0.000000       0.294269       0.227000   -9999.000000       0.149900   -9999.000000
57032     57032     shaanxi        108.2000       34.1333          103       153     2012      05        31        152              0.145042      25.044678       0.000000       0.269326       0.226000   -9999.000000       0.155300   -9999.000000
57032     57032     shaanxi        108.2000       34.1333          103       153     2012      06        01        153              0.126125      23.157806       0.000000       0.261197       0.135000   -9999.000000       0.147900   -9999.000000
57032     57032     shaanxi        108.2000       34.1333          103       153     2012      06        02        154              0.107583      25.744202       0.000000       0.242805       0.145500   -9999.000000   -9999.000000       0.462000
57032     57032     shaanxi        108.2000       34.1333          103       153     2012      06        03        155              0.095625      26.208954       0.102975       0.228752       0.144000   -9999.000000   -9999.000000   -9999.000000
57032     57032     shaanxi        108.2000       34.1333          103       153     2012      06        04        156              0.086333      24.490448       0.000000       0.223327   -9999.000000   -9999.000000       0.112600       0.603000
57032     57032     shaanxi        108.2000       34.1333          103       153     2012      06        05        157              0.080875      26.884369       0.344128       0.212046       0.158000   -9999.000000       0.143200   -9999.000000
57032     57032     shaanxi        108.2000       34.1333          103       153     2012      06        06        158              0.075292      22.980682       0.000000       0.215088       0.146000   -9999.000000       0.136500   -9999.000000
57032     57032     shaanxi        108.2000       34.1333          103       153     2012      06        07        159              0.067625      26.201355       0.000000       0.205083       0.139500   -9999.000000       0.139900       0.459000
57032     57032     shaanxi        108.2000       34.1333          103       153     2012      06        08        160              0.061583      28.596771       0.000000       0.191219       0.161000   -9999.000000   -9999.000000   -9999.000000
57032     57032     shaanxi        108.2000       34.1333          103       153     2012      06        09        161              0.057458      27.314514       0.000000       0.184430   -9999.000000   -9999.000000       0.137300       0.461000
57032     57032     shaanxi        108.2000       34.1333          103       153     2012      06        10        162              0.054000      30.711060       1.652818       0.177192       0.143000   -9999.000000       0.106200   -9999.000000
57032     57032     shaanxi        108.2000       34.1333          103       153     2012      06        11        163              0.000000      30.821075       0.000000       0.187294       0.116000   -9999.000000       0.119700   -9999.000000
57032     57032     shaanxi        108.2000       34.1333          103       153     2012      06        12        164              0.048917      29.005981       0.000000       0.182257       0.110500   -9999.000000       0.125800       0.441000
57032     57032     shaanxi        108.2000       34.1333          103       153     2012      06        13        165              0.047917      31.249847       0.000000       0.172880       0.132000   -9999.000000       0.125900   -9999.000000
57032     57032     shaanxi        108.2000       34.1333          103       153     2012      06        14        166              0.045875      33.253845       0.000000       0.168994       0.127000   -9999.000000   -9999.000000       0.416000
57032     57032     shaanxi        108.2000       34.1333          103       153     2012      06        15        167              0.044333      30.242126       0.000000       0.166502       0.127000   -9999.000000       0.116900   -9999.000000
57032     57032     shaanxi        108.2000       34.1333          103       153     2012      06        16        168              0.043833      30.261810       0.000000       0.165576       0.135000   -9999.000000       0.123500       0.304000
57032     57032     shaanxi        108.2000       34.1333          103       153     2012      06        17        169              0.042958      31.607086       0.000000       0.164602       0.128000   -9999.000000       0.126700       0.553000
57032     57032     shaanxi        108.2000       34.1333          103       153     2012      06        18        170              0.041792      32.685150       0.000000       0.163975       0.146000   -9999.000000       0.118200   -9999.000000
57032     57032     shaanxi        108.2000       34.1333          103       153     2012      06        19        171              0.041000      32.099335       0.106960       0.163381       0.137000   -9999.000000   -9999.000000       0.551000
57032     57032     shaanxi        108.2000       34.1333          103       153     2012      06        20        172              0.040875      30.953247       0.000000       0.163911       0.147000   -9999.000000   -9999.000000   -9999.000000
57032     57032     shaanxi        108.2000       34.1333          103       153     2012      06        21        173              0.040792      32.651093       2.917019       0.162350       0.134000   -9999.000000       0.092800       0.387000
57032     57032     shaanxi        108.2000       34.1333          103       153     2012      06        22        174              0.040375      33.725189       0.000000       0.173327       0.112500   -9999.000000       0.112800       0.575000
57032     57032     shaanxi        108.2000       34.1333          103       153     2012      06        23        175              0.039833      33.440704       0.462655       0.172322       0.106000   -9999.000000       0.116200       0.475000
57032     57032     shaanxi        108.2000       34.1333          103       153     2012      06        24        176              0.038542      34.411560       0.690775       0.166269       0.138000   -9999.000000       0.121800       0.488000
57032     57032     shaanxi        108.2000       34.1333          103       153     2012      06        25        177              0.036958      32.363739       2.140224       0.166848   -9999.000000   -9999.000000   -9999.000000   -9999.000000
57032     57032     shaanxi        108.2000       34.1333          103       153     2012      06        26        178              0.036875      27.695374       0.422942       0.194103       0.142000   -9999.000000       0.129000       0.634000
57032     57032     shaanxi        108.2000       34.1333          103       153     2012      06        27        179              0.038208      26.656982       0.000000       0.186624       0.139000   -9999.000000       0.103000       0.474000
57032     57032     shaanxi        108.2000       34.1333          103       153     2012      06        28        180              0.038208      28.855072       0.717635       0.174499       0.152000   -9999.000000       0.132800       0.424000
57032     57032     shaanxi        108.2000       34.1333          103       153     2012      06        29        181              0.115958      27.644531      23.456810       0.172419       0.156000   -9999.000000       0.152200   -9999.000000
57032     57032     shaanxi        108.2000       34.1333          103       153     2012      06        30        182              0.133875      24.655426       0.000000       0.323462   -9999.000000   -9999.000000       0.142200   -9999.000000
57032     57032     shaanxi        108.2000       34.1333          103       153     2012      07        01        183              0.129750      27.230927       0.000000       0.271868       0.140000   -9999.000000   -9999.000000       0.694000
57032     57032     shaanxi        108.2000       34.1333          103       153     2012      07        02        184              0.210500      29.065521      20.532421       0.247047       0.165000   -9999.000000       0.143300   -9999.000000
57032     57032     shaanxi        108.2000       34.1333          103       153     2012      07        03        185              0.199000      23.971436       1.446514       0.334360       0.139000   -9999.000000       0.127700       0.720000
57032     57032     shaanxi        108.2000       34.1333          103       153     2012      07        04        186              0.215750      28.650726       4.876306       0.292510       0.146000   -9999.000000       0.151100   -9999.000000
57032     57032     shaanxi        108.2000       34.1333          103       153     2012      07        05        187              0.204625      25.822449       0.000000       0.306819       0.135000   -9999.000000       0.139600   -9999.000000
57032     57032     shaanxi        108.2000       34.1333          103       153     2012      07        06        188              0.190042      28.663727       0.259316       0.275736   -9999.000000   -9999.000000   -9999.000000       0.703000
57032     57032     shaanxi        108.2000       34.1333          103       153     2012      07        07        189              0.190250      29.300629       5.085613       0.259517   -9999.000000   -9999.000000   -9999.000000   -9999.000000
57032     57032     shaanxi        108.2000       34.1333          103       153     2012      07        08        190              0.258958      27.971405      47.327446       0.269507       0.157000       0.140600       0.114700       1.000000
57032     57032     shaanxi        108.2000       34.1333          103       153     2012      07        09        191              0.258833      25.316010       6.010910       0.385077       0.169000   -9999.000000       0.146800   -9999.000000
57032     57032     shaanxi        108.2000       34.1333          103       153     2012      07        10        192              0.242292      24.873688       0.156114       0.356589       0.150000   -9999.000000       0.142400   -9999.000000
57032     57032     shaanxi        108.2000       34.1333          103       153     2012      07        11        193              0.230917      29.163483       0.850970       0.327683   -9999.000000   -9999.000000       0.133000       0.777000
57032     57032     shaanxi        108.2000       34.1333          103       153     2012      07        12        194              0.218917      29.018433       0.000000       0.315884       0.161000   -9999.000000   -9999.000000   -9999.000000
57032     57032     shaanxi        108.2000       34.1333          103       153     2012      07        13        195              0.206167      29.717102       3.462069       0.302430       0.147000   -9999.000000       0.134400       0.678000
57032     57032     shaanxi        108.2000       34.1333          103       153     2012      07        14        196              0.193958      29.177124       0.000000       0.289669       0.159500   -9999.000000       0.111200   -9999.000000
57032     57032     shaanxi        108.2000       34.1333          103       153     2012      07        15        197              0.185000      28.149628       0.000000       0.281669       0.166000   -9999.000000       0.124100       0.564000
57032     57032     shaanxi        108.2000       34.1333          103       153     2012      07        16        198              0.176625      28.635925       0.000000       0.274127       0.144000   -9999.000000       0.134400       0.724000
57032     57032     shaanxi        108.2000       34.1333          103       153     2012      07        17        199              0.169875      28.519196       0.000000       0.266230       0.164000   -9999.000000   -9999.000000   -9999.000000
57032     57032     shaanxi        108.2000       34.1333          103       153     2012      07        18        200              0.218583      28.000031       0.000000       0.257442       0.164000   -9999.000000   -9999.000000       0.596000
57032     57032     shaanxi        108.2000       34.1333          103       153     2012      07        19        201              0.245125      28.976471       0.000000       0.248206       0.148000   -9999.000000       0.107200   -9999.000000
57032     57032     shaanxi        108.2000       34.1333          103       153     2012      07        20        202              0.240870      29.387604       0.170189       0.240579       0.169000   -9999.000000       0.117100       0.581000
57032     57032     shaanxi        108.2000       34.1333          103       153     2012      07        21        203              0.244826      30.075012       8.033965       0.234118   -9999.000000       0.097100       0.140400       0.987000
57032     57032     shaanxi        108.2000       34.1333          103       153     2012      07        22        204              0.256125      26.014313       0.606069       0.280855   -9999.000000   -9999.000000       0.126000       0.807000
57032     57032     shaanxi        108.2000       34.1333          103       153     2012      07        23        205              0.246958      28.644928       2.752908       0.266043       0.206000   -9999.000000   -9999.000000       0.889000
57032     57032     shaanxi        108.2000       34.1333          103       153     2012      07        24        206              0.246208      25.648041       0.000000       0.270790       0.176500   -9999.000000       0.129200   -9999.000000
57032     57032     shaanxi        108.2000       34.1333          103       153     2012      07        25        207              0.242833      28.011719       0.000000       0.261902       0.175000   -9999.000000       0.098300       0.643000
57032     57032     shaanxi        108.2000       34.1333          103       153     2012      07        26        208              0.240750      29.057739       0.000000       0.250373       0.182000       0.063000       0.120600   -9999.000000
57032     57032     shaanxi        108.2000       34.1333          103       153     2012      07        27        209              0.234917      31.640564       0.000000       0.233008   -9999.000000   -9999.000000       0.118600       0.620000
57032     57032     shaanxi        108.2000       34.1333          103       153     2012      07        28        210              0.228667      32.926239       0.000000       0.215799       0.183000   -9999.000000       0.120000       0.530000
57032     57032     shaanxi        108.2000       34.1333          103       153     2012      07        29        211              0.224833      34.064697       0.000000       0.201661       0.157000   -9999.000000   -9999.000000   -9999.000000
57032     57032     shaanxi        108.2000       34.1333          103       153     2012      07        30        212              0.138625      35.373230       2.302322       0.191642       0.178500   -9999.000000       0.106500       0.720000
57032     57032     shaanxi        108.2000       34.1333          103       153     2012      07        31        213              0.131292      31.167938       0.000000       0.206073       0.201000   -9999.000000       0.104300   -9999.000000
57032     57032     shaanxi        108.2000       34.1333          103       153     2012      08        01        214              0.127833      29.217407       0.149809       0.205583       0.198000   -9999.000000       0.107900       0.733000
57032     57032     shaanxi        108.2000       34.1333          103       153     2012      08        02        215              0.128542      27.928986       0.736297       0.195717       0.210000   -9999.000000       0.107900   -9999.000000
57032     57032     shaanxi        108.2000       34.1333          103       153     2012      08        03        216              0.129125      30.688965       0.745127       0.187182       0.203000   -9999.000000   -9999.000000   -9999.000000
57032     57032     shaanxi        108.2000       34.1333          103       153     2012      08        04        217              0.125917      31.639893       0.000000       0.181540       0.193000   -9999.000000   -9999.000000       0.628000
57032     57032     shaanxi        108.2000       34.1333          103       153     2012      08        05        218              0.122542      31.784821       1.551696       0.176765       0.217500   -9999.000000       0.100100   -9999.000000
57032     57032     shaanxi        108.2000       34.1333          103       153     2012      08        06        219              0.121583      29.980865       4.960485       0.188691       0.217000   -9999.000000       0.102300       0.708000
57032     57032     shaanxi        108.2000       34.1333          103       153     2012      08        07        220              0.123375      29.927551       0.000000       0.189658   -9999.000000   -9999.000000       0.095600   -9999.000000
57032     57032     shaanxi        108.2000       34.1333          103       153     2012      08        08        221              0.122500      32.381622       0.371390       0.176597       0.220000   -9999.000000       0.103800   -9999.000000
57032     57032     shaanxi        108.2000       34.1333          103       153     2012      08        09        222              0.120125      32.489410       2.846300       0.172504       0.204500   -9999.000000   -9999.000000       0.674000
57032     57032     shaanxi        108.2000       34.1333          103       153     2012      08        10        223              0.116250      32.506836       0.000000       0.168969       0.193500   -9999.000000   -9999.000000   -9999.000000
57032     57032     shaanxi        108.2000       34.1333          103       153     2012      08        11        224              0.116792      31.515045       0.000000       0.166882       0.230000   -9999.000000       0.080000       0.655000
57032     57032     shaanxi        108.2000       34.1333          103       153     2012      08        12        225              0.143792      33.386810      12.822416       0.164358       0.214000   -9999.000000       0.116700   -9999.000000
57032     57032     shaanxi        108.2000       34.1333          103       153     2012      08        13        226              0.197792      31.956940      24.017693       0.213941       0.288000       0.038100       0.110200       1.000000
57032     57032     shaanxi        108.2000       34.1333          103       153     2012      08        14        227              0.213500      25.543549       3.983776       0.336759       0.289000   -9999.000000       0.094200       0.919000
57032     57032     shaanxi        108.2000       34.1333          103       153     2012      08        15        228              0.206667      25.323181       0.304785       0.311127       0.235000   -9999.000000   -9999.000000   -9999.000000
57032     57032     shaanxi        108.2000       34.1333          103       153     2012      08        16        229              0.194792      26.839417       0.000000       0.289697       0.258000   -9999.000000       0.083700       0.731000
57032     57032     shaanxi        108.2000       34.1333          103       153     2012      08        17        230              0.194083      28.571350       8.952188       0.272672       0.238000   -9999.000000       0.107900   -9999.000000
57032     57032     shaanxi        108.2000       34.1333          103       153     2012      08        18        231              0.222125      26.791473       2.235041       0.282726   -9999.000000       0.060000       0.094600       0.959000
57032     57032     shaanxi        108.2000       34.1333          103       153     2012      08        19        232              0.256792      24.040222      13.605156       0.307327       0.297000   -9999.000000       0.106200       0.962000
57032     57032     shaanxi        108.2000       34.1333          103       153     2012      08        20        233              0.247792      23.179474       0.518006       0.336031       0.282000   -9999.000000   -9999.000000       0.854000
57032     57032     shaanxi        108.2000       34.1333          103       153     2012      08        21        234              0.238875      23.564209       0.000000       0.312074       0.224000   -9999.000000   -9999.000000       1.000000
57032     57032     shaanxi        108.2000       34.1333          103       153     2012      08        22        235              0.225958      25.309235       0.000000       0.296241       0.196000   -9999.000000       0.091700   -9999.000000
57032     57032     shaanxi        108.2000       34.1333          103       153     2012      08        23        236              0.211333      25.604523       0.000000       0.281109   -9999.000000   -9999.000000       0.112200       0.676000
57032     57032     shaanxi        108.2000       34.1333          103       153     2012      08        24        237              0.199375      25.769196       0.000000       0.269206   -9999.000000   -9999.000000       0.104000   -9999.000000
57032     57032     shaanxi        108.2000       34.1333          103       153     2012      08        25        238              0.000000      26.111755       2.985301       0.258624       0.217500   -9999.000000       0.108700   -9999.000000
57032     57032     shaanxi        108.2000       34.1333          103       153     2012      08        26        239              0.183208      26.888214       0.000000       0.264968       0.215500       0.199100   -9999.000000       0.609000
57032     57032     shaanxi        108.2000       34.1333          103       153     2012      08        27        240              0.192292      26.624023      11.527005       0.263765       0.216000   -9999.000000       0.139800   -9999.000000
57032     57032     shaanxi        108.2000       34.1333          103       153     2012      08        28        241              0.208542      26.288452       0.000000       0.293633       0.172000   -9999.000000       0.110900       0.765000
57032     57032     shaanxi        108.2000       34.1333          103       153     2012      08        29        242              0.193292      26.878113       0.000000       0.289811       0.234000   -9999.000000       0.130100   -9999.000000
57032     57032     shaanxi        108.2000       34.1333          103       153     2012      08        30        243              0.190167      27.924469      17.864126       0.267761   -9999.000000   -9999.000000       0.134200       0.689000
57032     57032     shaanxi        108.2000       34.1333          103       153     2012      08        31        244              0.286292      27.395142      37.163715       0.285981   -9999.000000       0.116100       0.155300   -9999.000000
57032     57032     shaanxi        108.2000       34.1333          103       153     2012      09        01        245              0.293042      22.978149      30.801069       0.380303       0.241000   -9999.000000   -9999.000000   -9999.000000
57032     57032     shaanxi        108.2000       34.1333          103       153     2012      09        02        246              0.254333      20.603943       0.000000       0.384807       0.201000       0.050300       0.147300       0.791000
57032     57032     shaanxi        108.2000       34.1333          103       153     2012      09        03        247              0.238333      23.087463       0.000000       0.350174   -9999.000000   -9999.000000       0.144300   -9999.000000
57032     57032     shaanxi        108.2000       34.1333          103       153     2012      09        04        248              0.224333      24.099182       0.000000       0.336884       0.221000   -9999.000000       0.125600       0.811000
57032     57032     shaanxi        108.2000       34.1333          103       153     2012      09        05        249              0.213500      24.610718       0.000000       0.327840       0.192500       0.045300       0.131900   -9999.000000
57032     57032     shaanxi        108.2000       34.1333          103       153     2012      09        06        250              0.204542      25.983612       0.000000       0.320789       0.190500   -9999.000000   -9999.000000   -9999.000000
57032     57032     shaanxi        108.2000       34.1333          103       153     2012      09        07        251              0.247417      25.660400      46.051094       0.314699       0.226000   -9999.000000   -9999.000000       1.000000
57032     57032     shaanxi        108.2000       34.1333          103       153     2012      09        08        252              0.267583      22.992920       7.061236       0.367130       0.276000   -9999.000000       0.123100   -9999.000000
57032     57032     shaanxi        108.2000       34.1333          103       153     2012      09        09        253              0.254750      22.710541       0.211096       0.373510       0.241000   -9999.000000       0.149900       0.939000
57032     57032     shaanxi        108.2000       34.1333          103       153     2012      09        10        254              0.273083      23.462158      20.717106       0.354449       0.282000   -9999.000000       0.165800   -9999.000000
57032     57032     shaanxi        108.2000       34.1333          103       153     2012      09        11        255              0.257042      21.180237       2.456021       0.379603       0.193000   -9999.000000       0.148900       1.000000
57032     57032     shaanxi        108.2000       34.1333          103       153     2012      09        12        256              0.245792      22.741211       0.000000       0.355810       0.224000   -9999.000000   -9999.000000       0.778000
57032     57032     shaanxi        108.2000       34.1333          103       153     2012      09        13        257              0.233917      20.165894       0.000000       0.346709       0.169000   -9999.000000       0.138300   -9999.000000
57032     57032     shaanxi        108.2000       34.1333          103       153     2012      09        14        258              0.219167      20.184509       0.000000       0.339813   -9999.000000   -9999.000000       0.110100       0.730000
57032     57032     shaanxi        108.2000       34.1333          103       153     2012      09        15        259              0.210000      20.985596       1.268802       0.334850       0.228000   -9999.000000       0.152200   -9999.000000
57032     57032     shaanxi        108.2000       34.1333          103       153     2012      09        16        260              0.208417      20.568817       0.316285       0.335172       0.202500   -9999.000000       0.147500       0.860000
57032     57032     shaanxi        108.2000       34.1333          103       153     2012      09        17        261              0.206125      19.355072       0.000000       0.334808       0.191000   -9999.000000   -9999.000000       0.693000
57032     57032     shaanxi        108.2000       34.1333          103       153     2012      09        18        262              0.197083      21.373260       0.000000       0.329706       0.163000   -9999.000000   -9999.000000       0.728000
57032     57032     shaanxi        108.2000       34.1333          103       153     2012      09        19        263              0.187917      22.386688       0.000000       0.325124   -9999.000000   -9999.000000       0.118900       0.710000
57032     57032     shaanxi        108.2000       34.1333          103       153     2012      09        20        264              0.183792      23.076080       2.197545       0.320888       0.223000   -9999.000000       0.145200   -9999.000000
57032     57032     shaanxi        108.2000       34.1333          103       153     2012      09        21        265              0.189708      20.994019       0.000000       0.326442   -9999.000000   -9999.000000       0.127400       0.741000
57032     57032     shaanxi        108.2000       34.1333          103       153     2012      09        22        266              0.185208      22.480286       0.000000       0.322892       0.142500   -9999.000000       0.132600       0.727000
57032     57032     shaanxi        108.2000       34.1333          103       153     2012      09        23        267              0.183208      22.034943       0.000000       0.320600       0.144000       0.043600   -9999.000000       0.769000
57032     57032     shaanxi        108.2000       34.1333          103       153     2012      09        24        268              0.181750      22.586029       3.814624       0.318391       0.145000   -9999.000000       0.184300       0.645000
57032     57032     shaanxi        108.2000       34.1333          103       153     2012      09        25        269              0.211833      22.746857       8.127481       0.320678       0.181000   -9999.000000       0.138500   -9999.000000
57032     57032     shaanxi        108.2000       34.1333          103       153     2012      09        26        270              0.213208      19.427765       0.000000       0.348108       0.177000   -9999.000000       0.174600       0.756000
57032     57032     shaanxi        108.2000       34.1333          103       153     2012      09        27        271              0.209429      20.737823       0.000000       0.332013       0.139500   -9999.000000       0.153200   -9999.000000
57032     57032     shaanxi        108.2000       34.1333          103       153     2012      09        28        272              0.191067      20.667023       0.000000       0.325410       0.139000   -9999.000000       0.152800       0.659000
57032     57032     shaanxi        108.2000       34.1333          103       153     2012      09        29        273              0.185375      18.523590       1.634143       0.319152       0.138000   -9999.000000   -9999.000000   -9999.000000
57032     57032     shaanxi        108.2000       34.1333          103       153     2012      09        30        274              0.178708      19.324432       0.000000       0.318386   -9999.000000   -9999.000000       0.145200   -9999.000000
57032     57032     shaanxi        108.2000       34.1333          103       153     2012      10        01        275              0.172583      19.782776       0.000000       0.314319       0.124000   -9999.000000       0.129100       0.650000
57032     57032     shaanxi        108.2000       34.1333          103       153     2012      10        02        276              0.199333      20.261810       9.227552       0.311091       0.156000   -9999.000000       0.156300   -9999.000000
57032     57032     shaanxi        108.2000       34.1333          103       153     2012      10        03        277              0.220250      18.228363       0.000000       0.335687       0.123000   -9999.000000       0.156800       0.777000
57032     57032     shaanxi        108.2000       34.1333          103       153     2012      10        04        278              0.207750      20.794037       0.000000       0.327561       0.150000   -9999.000000   -9999.000000   -9999.000000
57032     57032     shaanxi        108.2000       34.1333          103       153     2012      10        05        279              0.201125      18.672028       0.000000       0.322028       0.128000   -9999.000000   -9999.000000   -9999.000000
57032     57032     shaanxi        108.2000       34.1333          103       153     2012      10        06        280              0.194250      19.966370       0.000000       0.318287       0.136000       0.044700       0.120800       0.679000
57032     57032     shaanxi        108.2000       34.1333          103       153     2012      10        07        281              0.191875      18.180878       0.000000       0.316197       0.138000   -9999.000000       0.148500   -9999.000000
57032     57032     shaanxi        108.2000       34.1333          103       153     2012      10        08        282              0.197708      17.960480       2.482248       0.315774       0.152000   -9999.000000       0.126000       0.924000
57032     57032     shaanxi        108.2000       34.1333          103       153     2012      10        09        283              0.199458      17.225128       0.000000       0.323418       0.134500   -9999.000000       0.114500   -9999.000000
57032     57032     shaanxi        108.2000       34.1333          103       153     2012      10        10        284              0.191875      18.633179       0.000000       0.316273       0.123000   -9999.000000   -9999.000000       0.576000
57032     57032     shaanxi        108.2000       34.1333          103       153     2012      10        11        285              0.187167      18.626190       0.245859       0.312307   -9999.000000   -9999.000000       0.110900       0.685000
57032     57032     shaanxi        108.2000       34.1333          103       153     2012      10        12        286              0.186292      17.172546       0.000000       0.312359       0.106000   -9999.000000       0.081900   -9999.000000
57032     57032     shaanxi        108.2000       34.1333          103       153     2012      10        13        287              0.182667      18.313019       0.000000       0.311622       0.099000   -9999.000000       0.106100       0.609000
57032     57032     shaanxi        108.2000       34.1333          103       153     2012      10        14        288              0.176833      19.515350       0.000000       0.308184       0.107500   -9999.000000       0.112500   -9999.000000
57032     57032     shaanxi        108.2000       34.1333          103       153     2012      10        15        289              0.176042      18.281555       2.551353       0.306808       0.119000   -9999.000000       0.113600       0.491000
57032     57032     shaanxi        108.2000       34.1333          103       153     2012      10        16        290              0.183125      16.843597       0.000000       0.312015       0.116000       0.146700   -9999.000000       0.616000
57032     57032     shaanxi        108.2000       34.1333          103       153     2012      10        17        291              0.174750      15.284515       0.000000       0.311147       0.113000   -9999.000000       0.105700       0.574000
57032     57032     shaanxi        108.2000       34.1333          103       153     2012      10        18        292              0.168000      14.931641       0.000000       0.305944       0.121500   -9999.000000       0.113800       0.537000
57032     57032     shaanxi        108.2000       34.1333          103       153     2012      10        19        293              0.167500      13.365509       0.000000       0.306148       0.098500   -9999.000000       0.104700   -9999.000000
57032     57032     shaanxi        108.2000       34.1333          103       153     2012      10        20        294              0.165250      15.682770       0.000000       0.304549       0.117000   -9999.000000       0.114900       0.530000
57032     57032     shaanxi        108.2000       34.1333          103       153     2012      10        21        295              0.161000      17.008392       0.763786       0.302595   -9999.000000   -9999.000000   -9999.000000       0.546000
57032     57032     shaanxi        108.2000       34.1333          103       153     2012      10        22        296              0.160042      13.444550       0.000000       0.303545   -9999.000000   -9999.000000   -9999.000000       0.644000
57032     57032     shaanxi        108.2000       34.1333          103       153     2012      10        23        297              0.158125      13.924927       1.372828       0.300606   -9999.000000   -9999.000000       0.092500       0.638000
57032     57032     shaanxi        108.2000       34.1333          103       153     2012      10        24        298              0.161417      11.084930       0.000000       0.307878   -9999.000000   -9999.000000       0.113200   -9999.000000
57032     57032     shaanxi        108.2000       34.1333          103       153     2012      10        25        299              0.000000      14.086945       0.000000       0.303375       0.137000   -9999.000000       0.109200       0.535000
57032     57032     shaanxi        108.2000       34.1333          103       153     2012      10        26        300              0.155417      14.774139       0.000000       0.300871       0.129000   -9999.000000       0.108300   -9999.000000
57032     57032     shaanxi        108.2000       34.1333          103       153     2012      10        27        301              0.149417      16.209412       0.000000       0.298870   -9999.000000   -9999.000000   -9999.000000       0.557000
57032     57032     shaanxi        108.2000       34.1333          103       153     2012      10        28        302              0.000000      15.189087       0.537341       0.297595       0.142000   -9999.000000       0.116700   -9999.000000
57032     57032     shaanxi        108.2000       34.1333          103       153     2012      10        29        303              0.150125      14.580658       0.770722       0.298232       0.130500       0.028400       0.084900   -9999.000000
57032     57032     shaanxi        108.2000       34.1333          103       153     2012      10        30        304              0.148000      14.569641       0.000000       0.303235       0.121000   -9999.000000       0.113700       0.502000
57032     57032     shaanxi        108.2000       34.1333          103       153     2012      10        31        305              0.144250      13.101166       0.000000       0.297914       0.138000   -9999.000000       0.110700   -9999.000000
57032     57032     shaanxi        108.2000       34.1333          103       153     2012      11        01        306              0.139958      12.559723       0.000000       0.295359       0.124000   -9999.000000       0.108900       0.523000
57032     57032     shaanxi        108.2000       34.1333          103       153     2012      11        02        307              0.138167      11.836365       0.000000       0.294644       0.129000   -9999.000000   -9999.000000   -9999.000000
57032     57032     shaanxi        108.2000       34.1333          103       153     2012      11        03        308              0.132750      12.790802       0.000000       0.293051   -9999.000000       0.124900       0.095500   -9999.000000
57032     57032     shaanxi        108.2000       34.1333          103       153     2012      11        04        309              0.129000       9.144623       0.000000       0.290124       0.114000   -9999.000000       0.106000       0.509000
57032     57032     shaanxi        108.2000       34.1333          103       153     2012      11        05        310              0.127000       8.170959       0.000000       0.289510       0.132000   -9999.000000       0.088700   -9999.000000
57032     57032     shaanxi        108.2000       34.1333          103       153     2012      11        06        311              0.126292       7.949402       0.000000       0.288893       0.133000   -9999.000000       0.093200       0.512000
57032     57032     shaanxi        108.2000       34.1333          103       153     2012      11        07        312              0.131125       9.224762       1.996400       0.288953   -9999.000000   -9999.000000   -9999.000000   -9999.000000
57032     57032     shaanxi        108.2000       34.1333          103       153     2012      11        08        313              0.136333       7.947144       0.000000       0.295042   -9999.000000   -9999.000000   -9999.000000       0.554000
57032     57032     shaanxi        108.2000       34.1333          103       153     2012      11        09        314              0.135625       9.663666       1.327944       0.292143       0.148500   -9999.000000       0.074900       0.613000
57032     57032     shaanxi        108.2000       34.1333          103       153     2012      11        10        315              0.135458       8.884949       0.000000       0.293223       0.128000   -9999.000000       0.094600   -9999.000000
57032     57032     shaanxi        108.2000       34.1333          103       153     2012      11        11        316              0.133625       6.992188       0.000000       0.291783       0.144000   -9999.000000       0.094300       0.341000
57032     57032     shaanxi        108.2000       34.1333          103       153     2012      11        12        317              0.132208       7.041046       0.000000       0.289948       0.147000   -9999.000000       0.089600   -9999.000000
57032     57032     shaanxi        108.2000       34.1333          103       153     2012      11        13        318              0.000000       8.336304       0.000000       0.289620   -9999.000000       0.075700   -9999.000000       0.362000
57032     57032     shaanxi        108.2000       34.1333          103       153     2012      11        14        319              0.128958       8.325165       0.000000       0.288427       0.143000   -9999.000000       0.084900       0.490000
57032     57032     shaanxi        108.2000       34.1333          103       153     2012      11        15        320              0.128208       7.379822       0.674535       0.288418   -9999.000000   -9999.000000       0.075800       0.383000
57032     57032     shaanxi        108.2000       34.1333          103       153     2012      11        16        321              0.129500       6.128571       0.000000       0.290629       0.150000   -9999.000000       0.088300       0.316000
57032     57032     shaanxi        108.2000       34.1333          103       153     2012      11        17        322              0.000000       7.832275       0.000000       0.289297       0.136000   -9999.000000       0.090500   -9999.000000
57032     57032     shaanxi        108.2000       34.1333          103       153     2012      11        18        323              0.126792       7.845490       0.000000       0.288194   -9999.000000   -9999.000000   -9999.000000       0.310000
57032     57032     shaanxi        108.2000       34.1333          103       153     2012      11        19        324              0.125333       8.858185       0.000000       0.287432       0.149000   -9999.000000   -9999.000000   -9999.000000
57032     57032     shaanxi        108.2000       34.1333          103       153     2012      11        20        325              0.125125       7.888092       0.000000       0.287209       0.137000   -9999.000000       0.065600       0.395000
57032     57032     shaanxi        108.2000       34.1333          103       153     2012      11        21        326              0.125792       7.062500       0.000000       0.288231       0.135500   -9999.000000       0.075400       0.300000
57032     57032     shaanxi        108.2000       34.1333          103       153     2012      11        22        327              0.123583       8.933502       0.000000       0.287753       0.139000   -9999.000000       0.075600   -9999.000000
57032     57032     shaanxi        108.2000       34.1333          103       153     2012      11        23        328              0.121250       7.138885       0.000000       0.286250   -9999.000000   -9999.000000       0.077700       0.269000
57032     57032     shaanxi        108.2000       34.1333          103       153     2012      11        24        329              0.118958       6.146423       1.997193       0.284956   -9999.000000   -9999.000000   -9999.000000   -9999.000000
57032     57032     shaanxi        108.2000       34.1333          103       153     2012      11        25        330              0.124167       5.349274       0.462586       0.287017   -9999.000000   -9999.000000       0.086800       0.547000
57032     57032     shaanxi        108.2000       34.1333          103       153     2012      11        26        331              0.126042       4.688843       0.000000       0.289332       0.131000   -9999.000000   -9999.000000   -9999.000000
57032     57032     shaanxi        108.2000       34.1333          103       153     2012      11        27        332              0.126000       4.636475       0.000000       0.285553       0.141000   -9999.000000       0.064600   -9999.000000
57032     57032     shaanxi        108.2000       34.1333          103       153     2012      11        28        333              0.124500       5.458130       0.000000       0.286399       0.134000   -9999.000000       0.068300       0.263000
57032     57032     shaanxi        108.2000       34.1333          103       153     2012      11        29        334              0.122958       3.382568       0.000000       0.279133   -9999.000000   -9999.000000       0.068400   -9999.000000
57032     57032     shaanxi        108.2000       34.1333          103       153     2012      11        30        335              0.122667       2.081696       0.080663       0.266446   -9999.000000   -9999.000000   -9999.000000       0.348000
57032     57032     shaanxi        108.2000       34.1333          103       153     2012      12        01        336              0.123875       2.343658       0.000000       0.276463       0.128000   -9999.000000       0.073300   -9999.000000
57032     57032     shaanxi        108.2000       34.1333          103       153     2012      12        02        337              0.123542       3.114136       0.000000       0.283878   -9999.000000   -9999.000000       0.069800   -9999.000000
57032     57032     shaanxi        108.2000       34.1333          103       153     2012      12        03        338              0.123333       2.476166       0.000000       0.282542       0.142000   -9999.000000       0.068900       0.277000
57032     57032     shaanxi        108.2000       34.1333          103       153     2012      12        04        339              0.122958       3.777802       0.000000       0.278593   -9999.000000   -9999.000000       0.076100   -9999.000000
57032     57032     shaanxi        108.2000       34.1333          103       153     2012      12        05        340              0.121833       4.603851       0.000000       0.282773   -9999.000000   -9999.000000   -9999.000000       0.254000
57032     57032     shaanxi        108.2000       34.1333          103       153     2012      12        06        341              0.121042       4.307312       0.000000       0.279470       0.123000   -9999.000000   -9999.000000   -9999.000000
57032     57032     shaanxi        108.2000       34.1333          103       153     2012      12        07        342              0.120292       4.725037       0.000000       0.281604       0.117000   -9999.000000       0.047400       0.233000
57032     57032     shaanxi        108.2000       34.1333          103       153     2012      12        08        343              0.118292       4.849579       0.000000       0.282072       0.134000   -9999.000000       0.067700       0.323000
57032     57032     shaanxi        108.2000       34.1333          103       153     2012      12        09        344              0.117875       2.794220       0.000000       0.264937       0.137000   -9999.000000       0.068000   -9999.000000
57032     57032     shaanxi        108.2000       34.1333          103       153     2012      12        10        345              0.118083       1.833984       0.000000       0.260656   -9999.000000   -9999.000000       0.066200       0.264000
57032     57032     shaanxi        108.2000       34.1333          103       153     2012      12        11        346              0.116833       2.597504       0.000000       0.263499   -9999.000000   -9999.000000   -9999.000000   -9999.000000
57032     57032     shaanxi        108.2000       34.1333          103       153     2012      12        12        347              0.116750       1.189392       0.000000       0.247004   -9999.000000   -9999.000000       0.062100       0.118000
57032     57032     shaanxi        108.2000       34.1333          103       153     2012      12        13        348              0.117750       0.926208       0.000000       0.242444   -9999.000000   -9999.000000       0.042900       0.273000
57032     57032     shaanxi        108.2000       34.1333          103       153     2012      12        14        349              0.118958       0.571655       0.000000       0.244011       0.126000       0.023700       0.068100       0.267000
57032     57032     shaanxi        108.2000       34.1333          103       153     2012      12        15        350              0.000000       1.767181       0.000000       0.265497   -9999.000000   -9999.000000       0.066300       0.310000
57032     57032     shaanxi        108.2000       34.1333          103       153     2012      12        16        351              0.119750       1.314087       0.000000       0.267060   -9999.000000   -9999.000000       0.070300   -9999.000000
57032     57032     shaanxi        108.2000       34.1333          103       153     2012      12        17        352              0.120625       2.049896       0.000000       0.276159   -9999.000000   -9999.000000   -9999.000000       0.212000
57032     57032     shaanxi        108.2000       34.1333          103       153     2012      12        18        353              0.120250       2.286163       0.000000       0.273861       0.121000   -9999.000000       0.056500       0.110000
57032     57032     shaanxi        108.2000       34.1333          103       153     2012      12        19        354              0.119875       2.070709       0.000000       0.257716   -9999.000000   -9999.000000       0.074100       0.293000
57032     57032     shaanxi        108.2000       34.1333          103       153     2012      12        20        355              0.000000       1.413300       0.075975       0.260281   -9999.000000   -9999.000000       0.064400       0.395000
57032     57032     shaanxi        108.2000       34.1333          103       153     2012      12        21        356              0.122917       0.972626       0.334046       0.256510   -9999.000000   -9999.000000       0.066600   -9999.000000
57032     57032     shaanxi        108.2000       34.1333          103       153     2012      12        22        357              0.122875       1.546051       0.000000       0.259476   -9999.000000   -9999.000000   -9999.000000       0.219000
57032     57032     shaanxi        108.2000       34.1333          103       153     2012      12        23        358              0.119542       0.548248       0.000000       0.239800   -9999.000000   -9999.000000   -9999.000000   -9999.000000
57032     57032     shaanxi        108.2000       34.1333          103       153     2012      12        24        359              0.116368      -1.862854       0.000000       0.189002   -9999.000000   -9999.000000       0.032500       0.183000
57032     57032     shaanxi        108.2000       34.1333          103       153     2012      12        25        360              0.116125      -1.457855       0.000000       0.193949   -9999.000000   -9999.000000       0.068100   -9999.000000
57032     57032     shaanxi        108.2000       34.1333          103       153     2012      12        26        361              0.000000      -0.656860       0.000000       0.204345   -9999.000000   -9999.000000       0.069300   -9999.000000
57032     57032     shaanxi        108.2000       34.1333          103       153     2012      12        27        362              0.114727      -1.530487       0.000000       0.192877   -9999.000000   -9999.000000       0.072300       0.050000
57032     57032     shaanxi        108.2000       34.1333          103       153     2012      12        28        363              0.000000      -1.360504       0.000000       0.193422   -9999.000000   -9999.000000   -9999.000000   -9999.000000
57032     57032     shaanxi        108.2000       34.1333          103       153     2012      12        29        364              0.000000      -0.511902       0.000000       0.208448   -9999.000000   -9999.000000       0.067500       0.087000
57032     57032     shaanxi        108.2000       34.1333          103       153     2012      12        30        365              0.000000      -2.437134       0.000000       0.184775       0.103000   -9999.000000       0.051800   -9999.000000
57032     57032     shaanxi        108.2000       34.1333          103       153     2012      12        31        366              0.115533      -1.472778       0.000000       0.197214   -9999.000000   -9999.000000       0.066300   -9999.000000
