# Supplementary material for: Research on Fusing Multisatellite Soil Moisture Data Based on Bayesian Model Averaging
Source: Hindawi journal article supplement (doi:10.1155/2018/9310838), 2018-06-25
Supplement: f1 [file 9310838.f1.zip › 2012_sm00-10cm_daily_ZDB_ZHY_57033_366days_allin.txt]

57033     57033     shaanxi        108.8167       34.5500          102       155     2012      01        01        001              0.000000   -9999.000000       0.000000   -9999.000000       0.096000   -9999.000000       0.046000   -9999.000000
57033     57033     shaanxi        108.8167       34.5500          102       155     2012      01        02        002              0.274000       0.072815       0.000000       0.198369       0.099000   -9999.000000   -9999.000000       0.219000
57033     57033     shaanxi        108.8167       34.5500          102       155     2012      01        03        003              0.000000       1.260864       0.000000       0.205921   -9999.000000   -9999.000000       0.057100   -9999.000000
57033     57033     shaanxi        108.8167       34.5500          102       155     2012      01        04        004              0.268826      -0.305634       0.000000       0.196719   -9999.000000   -9999.000000       0.034300       0.027000
57033     57033     shaanxi        108.8167       34.5500          102       155     2012      01        05        005              0.262792      -1.531952       0.000000       0.188760   -9999.000000   -9999.000000       0.055100       0.023000
57033     57033     shaanxi        108.8167       34.5500          102       155     2012      01        06        006              0.255625      -2.139771       0.000000       0.185095       0.087000   -9999.000000       0.055900       0.148000
57033     57033     shaanxi        108.8167       34.5500          102       155     2012      01        07        007              0.259083      -0.562012       0.000000       0.193723   -9999.000000   -9999.000000       0.056100   -9999.000000
57033     57033     shaanxi        108.8167       34.5500          102       155     2012      01        08        008              0.000000      -1.075226       0.000000       0.192452       0.095000   -9999.000000   -9999.000000   -9999.000000
57033     57033     shaanxi        108.8167       34.5500          102       155     2012      01        09        009              0.260458       0.400330       0.000000       0.200305   -9999.000000   -9999.000000   -9999.000000       0.114000
57033     57033     shaanxi        108.8167       34.5500          102       155     2012      01        10        010              0.261333       1.116760       0.000000       0.204109   -9999.000000   -9999.000000       0.037500   -9999.000000
57033     57033     shaanxi        108.8167       34.5500          102       155     2012      01        11        011              0.261000       0.334137       0.000000       0.201051       0.089000   -9999.000000       0.035100       0.028000
57033     57033     shaanxi        108.8167       34.5500          102       155     2012      01        12        012              0.260875       0.479889       0.000000       0.200390       0.100000   -9999.000000       0.041200   -9999.000000
57033     57033     shaanxi        108.8167       34.5500          102       155     2012      01        13        013              0.261625       0.584381       0.000000       0.200998   -9999.000000   -9999.000000   -9999.000000   -9999.000000
57033     57033     shaanxi        108.8167       34.5500          102       155     2012      01        14        014              0.262167       0.691925       1.530779       0.203831   -9999.000000   -9999.000000   -9999.000000       0.080000
57033     57033     shaanxi        108.8167       34.5500          102       155     2012      01        15        015              0.260833       0.987122       0.000000       0.203645   -9999.000000   -9999.000000       0.015600   -9999.000000
57033     57033     shaanxi        108.8167       34.5500          102       155     2012      01        16        016              0.260125       0.773834       0.000000       0.202065   -9999.000000   -9999.000000       0.034100       0.147000
57033     57033     shaanxi        108.8167       34.5500          102       155     2012      01        17        017              0.000000       0.416016       0.000000       0.202053       0.098000   -9999.000000       0.036200   -9999.000000
57033     57033     shaanxi        108.8167       34.5500          102       155     2012      01        18        018              0.261000       1.274200       0.000000       0.206800   -9999.000000   -9999.000000       0.036800   -9999.000000
57033     57033     shaanxi        108.8167       34.5500          102       155     2012      01        19        019              0.261417      -0.051361       0.000000       0.202640   -9999.000000   -9999.000000   -9999.000000       0.181000
57033     57033     shaanxi        108.8167       34.5500          102       155     2012      01        20        020              0.263375       0.333588       0.530936       0.204944   -9999.000000   -9999.000000       0.038900   -9999.000000
57033     57033     shaanxi        108.8167       34.5500          102       155     2012      01        21        021              0.269792       0.514404       0.406794       0.210099   -9999.000000   -9999.000000       0.024600       0.226000
57033     57033     shaanxi        108.8167       34.5500          102       155     2012      01        22        022              0.278375      -0.698883       0.204732       0.200447   -9999.000000   -9999.000000       0.027600   -9999.000000
57033     57033     shaanxi        108.8167       34.5500          102       155     2012      01        23        023              0.278875      -2.873718       0.157272       0.184097   -9999.000000   -9999.000000       0.028700       0.006000
57033     57033     shaanxi        108.8167       34.5500          102       155     2012      01        24        024              0.276125      -3.410248       0.000000       0.178464   -9999.000000   -9999.000000   -9999.000000       0.006000
57033     57033     shaanxi        108.8167       34.5500          102       155     2012      01        25        025              0.272083      -3.468536       0.959305       0.178713   -9999.000000   -9999.000000   -9999.000000   -9999.000000
57033     57033     shaanxi        108.8167       34.5500          102       155     2012      01        26        026              0.270292      -2.196686       0.000000       0.185980   -9999.000000   -9999.000000       0.025400       0.042000
57033     57033     shaanxi        108.8167       34.5500          102       155     2012      01        27        027              0.278167      -0.787933       0.000000       0.194400       0.096000   -9999.000000       0.028600   -9999.000000
57033     57033     shaanxi        108.8167       34.5500          102       155     2012      01        28        028              0.291333       0.480164       0.000000       0.202375       0.108000   -9999.000000       0.039200       0.292000
57033     57033     shaanxi        108.8167       34.5500          102       155     2012      01        29        029              0.294208       1.683075       0.000000       0.209598   -9999.000000   -9999.000000       0.042500       0.280000
57033     57033     shaanxi        108.8167       34.5500          102       155     2012      01        30        030              0.292208       1.631439       0.000000       0.210017   -9999.000000   -9999.000000   -9999.000000       0.391000
57033     57033     shaanxi        108.8167       34.5500          102       155     2012      01        31        031              0.289875       2.433380       0.000000       0.211732   -9999.000000   -9999.000000   -9999.000000       0.297000
57033     57033     shaanxi        108.8167       34.5500          102       155     2012      02        01        032              0.287875       3.883087       0.000000       0.217564   -9999.000000   -9999.000000       0.022300   -9999.000000
57033     57033     shaanxi        108.8167       34.5500          102       155     2012      02        02        033              0.283917       2.145325       0.000000       0.209659   -9999.000000   -9999.000000       0.036700       0.008000
57033     57033     shaanxi        108.8167       34.5500          102       155     2012      02        03        034              0.281250       0.642700       0.000000       0.200524       0.110000   -9999.000000       0.044600       0.210000
57033     57033     shaanxi        108.8167       34.5500          102       155     2012      02        04        035              0.280250       2.127075       0.000000       0.205906   -9999.000000   -9999.000000       0.046100       0.343000
57033     57033     shaanxi        108.8167       34.5500          102       155     2012      02        05        036              0.279167       2.441559       0.000000       0.207358   -9999.000000   -9999.000000   -9999.000000       0.122000
57033     57033     shaanxi        108.8167       34.5500          102       155     2012      02        06        037              0.277500       3.312531       0.000000       0.210904   -9999.000000   -9999.000000       0.044100   -9999.000000
57033     57033     shaanxi        108.8167       34.5500          102       155     2012      02        07        038              0.273542       2.106537       0.000000       0.203129   -9999.000000   -9999.000000       0.034500       0.029000
57033     57033     shaanxi        108.8167       34.5500          102       155     2012      02        08        039              0.271292      -0.296112       0.000000       0.192268       0.097000   -9999.000000       0.042200   -9999.000000
57033     57033     shaanxi        108.8167       34.5500          102       155     2012      02        09        040              0.269542      -0.428436       0.000000       0.190362   -9999.000000   -9999.000000       0.045800       0.182000
57033     57033     shaanxi        108.8167       34.5500          102       155     2012      02        10        041              0.269292      -0.322510       0.000000       0.191532   -9999.000000   -9999.000000       0.044100   -9999.000000
57033     57033     shaanxi        108.8167       34.5500          102       155     2012      02        11        042              0.268750       1.148651       0.000000       0.195138       0.094000   -9999.000000   -9999.000000   -9999.000000
57033     57033     shaanxi        108.8167       34.5500          102       155     2012      02        12        043              0.269417       2.137024       0.000000       0.198846   -9999.000000   -9999.000000   -9999.000000       0.092000
57033     57033     shaanxi        108.8167       34.5500          102       155     2012      02        13        044              0.269083       2.764008       0.000000       0.201794   -9999.000000   -9999.000000   -9999.000000   -9999.000000
57033     57033     shaanxi        108.8167       34.5500          102       155     2012      02        14        045              0.267958       3.387878       0.000000       0.203244       0.097000   -9999.000000   -9999.000000       0.239000
57033     57033     shaanxi        108.8167       34.5500          102       155     2012      02        15        046              0.266833       4.866577       0.226212       0.205983   -9999.000000   -9999.000000       0.045300   -9999.000000
57033     57033     shaanxi        108.8167       34.5500          102       155     2012      02        16        047              0.265250       3.665527       0.403948       0.206174   -9999.000000   -9999.000000   -9999.000000   -9999.000000
57033     57033     shaanxi        108.8167       34.5500          102       155     2012      02        17        048              0.263250       3.177582       0.000000       0.201608       0.093000   -9999.000000       0.043000       0.061000
57033     57033     shaanxi        108.8167       34.5500          102       155     2012      02        18        049              0.261833       1.941406       0.000000       0.196356       0.100000   -9999.000000       0.015200   -9999.000000
57033     57033     shaanxi        108.8167       34.5500          102       155     2012      02        19        050              0.260500       2.305298       0.000000       0.196179       0.095000   -9999.000000       0.038000       0.327000
57033     57033     shaanxi        108.8167       34.5500          102       155     2012      02        20        051              0.258708       3.965485       0.000000       0.198155   -9999.000000   -9999.000000       0.042100   -9999.000000
57033     57033     shaanxi        108.8167       34.5500          102       155     2012      02        21        052              0.256833       4.852753       0.000000       0.199382   -9999.000000   -9999.000000   -9999.000000       0.161000
57033     57033     shaanxi        108.8167       34.5500          102       155     2012      02        22        053              0.255833       4.928802       0.000000       0.199992       0.087000   -9999.000000   -9999.000000       0.283000
57033     57033     shaanxi        108.8167       34.5500          102       155     2012      02        23        054              0.254000       6.239227       2.360297       0.201531       0.100000   -9999.000000       0.044900   -9999.000000
57033     57033     shaanxi        108.8167       34.5500          102       155     2012      02        24        055              0.252958       3.460236       0.000000       0.200340       0.093000   -9999.000000       0.035800       0.257000
57033     57033     shaanxi        108.8167       34.5500          102       155     2012      02        25        056              0.250667       4.608856       0.000000       0.199228   -9999.000000   -9999.000000       0.049600   -9999.000000
57033     57033     shaanxi        108.8167       34.5500          102       155     2012      02        26        057              0.249833       2.197662       0.411044       0.197099   -9999.000000   -9999.000000       0.048100       0.229000
57033     57033     shaanxi        108.8167       34.5500          102       155     2012      02        27        058              0.248333       2.571747       0.000000       0.199040       0.088000   -9999.000000   -9999.000000       0.130000
57033     57033     shaanxi        108.8167       34.5500          102       155     2012      02        28        059              0.247458       3.259949       0.000000       0.200896       0.087000   -9999.000000   -9999.000000       0.274000
57033     57033     shaanxi        108.8167       34.5500          102       155     2012      02        29        060              0.000000   -9999.000000       0.042635   -9999.000000       0.092000   -9999.000000   -9999.000000   -9999.000000
57033     57033     shaanxi        108.8167       34.5500          102       155     2012      03        01        061              0.246792       3.527802       0.324353       0.202374   -9999.000000   -9999.000000       0.047300   -9999.000000
57033     57033     shaanxi        108.8167       34.5500          102       155     2012      03        02        062              0.246875       3.737671       0.497269       0.209338   -9999.000000   -9999.000000       0.041800       0.266000
57033     57033     shaanxi        108.8167       34.5500          102       155     2012      03        03        063              0.245917       4.558350       0.960063       0.208776       0.123000   -9999.000000       0.041600       0.268000
57033     57033     shaanxi        108.8167       34.5500          102       155     2012      03        04        064              0.243958       4.843903       0.030235       0.206871       0.116000   -9999.000000   -9999.000000       0.255000
57033     57033     shaanxi        108.8167       34.5500          102       155     2012      03        05        065              0.242333       4.447632       0.000000       0.205518       0.110000   -9999.000000       0.047600       0.207000
57033     57033     shaanxi        108.8167       34.5500          102       155     2012      03        06        066              0.239667       5.825928       0.000000       0.205096       0.103000   -9999.000000       0.028100   -9999.000000
57033     57033     shaanxi        108.8167       34.5500          102       155     2012      03        07        067              0.000000       5.229340       0.084183       0.202147       0.112000   -9999.000000       0.051000       0.162000
57033     57033     shaanxi        108.8167       34.5500          102       155     2012      03        08        068              0.236542       5.765442       0.237842       0.201186       0.120000   -9999.000000       0.052300   -9999.000000
57033     57033     shaanxi        108.8167       34.5500          102       155     2012      03        09        069              0.234625       5.133179       0.991772       0.203295       0.115000   -9999.000000       0.048300       0.307000
57033     57033     shaanxi        108.8167       34.5500          102       155     2012      03        10        070              0.232083       6.241241       0.000000       0.204421       0.112000   -9999.000000   -9999.000000       0.028000
57033     57033     shaanxi        108.8167       34.5500          102       155     2012      03        11        071              0.227208       9.962646       0.000000       0.201150       0.092000   -9999.000000       0.045600   -9999.000000
57033     57033     shaanxi        108.8167       34.5500          102       155     2012      03        12        072              0.222583       8.571747       0.000000       0.195800   -9999.000000   -9999.000000       0.034100       0.073000
57033     57033     shaanxi        108.8167       34.5500          102       155     2012      03        13        073              0.219458       8.327393       0.000000       0.193666   -9999.000000   -9999.000000       0.042300   -9999.000000
57033     57033     shaanxi        108.8167       34.5500          102       155     2012      03        14        074              0.215792      11.910706       0.392680       0.190526       0.093500   -9999.000000   -9999.000000       0.256000
57033     57033     shaanxi        108.8167       34.5500          102       155     2012      03        15        075              0.214000      12.168091       0.236793       0.189260       0.115000   -9999.000000   -9999.000000   -9999.000000
57033     57033     shaanxi        108.8167       34.5500          102       155     2012      03        16        076              0.215750       7.407501       0.000000       0.196621       0.093000   -9999.000000   -9999.000000   -9999.000000
57033     57033     shaanxi        108.8167       34.5500          102       155     2012      03        17        077              0.214542      12.389221       0.000000       0.193140   -9999.000000   -9999.000000       0.028800       0.149000
57033     57033     shaanxi        108.8167       34.5500          102       155     2012      03        18        078              0.209875      14.807495       0.000000       0.187772       0.095000   -9999.000000       0.044300   -9999.000000
57033     57033     shaanxi        108.8167       34.5500          102       155     2012      03        19        079              0.204652      14.657349       0.000000       0.182825       0.090000   -9999.000000       0.051200       0.158000
57033     57033     shaanxi        108.8167       34.5500          102       155     2012      03        20        080              0.202042       8.964813       0.678457       0.183087       0.091500   -9999.000000       0.051100   -9999.000000
57033     57033     shaanxi        108.8167       34.5500          102       155     2012      03        21        081              0.200083       8.759064       0.304421       0.185011       0.142000   -9999.000000   -9999.000000       0.235000
57033     57033     shaanxi        108.8167       34.5500          102       155     2012      03        22        082              0.201000       5.501434       7.077694       0.190744       0.136000   -9999.000000       0.059600       0.305000
57033     57033     shaanxi        108.8167       34.5500          102       155     2012      03        23        083              0.200042       7.160919       0.000000       0.233794   -9999.000000   -9999.000000       0.024000   -9999.000000
57033     57033     shaanxi        108.8167       34.5500          102       155     2012      03        24        084              0.196542      10.284454       0.000000       0.218871       0.105000   -9999.000000       0.045000       0.153000
57033     57033     shaanxi        108.8167       34.5500          102       155     2012      03        25        085              0.000000      13.729187       0.000000       0.206597       0.102000   -9999.000000       0.047900   -9999.000000
57033     57033     shaanxi        108.8167       34.5500          102       155     2012      03        26        086              0.187708      15.409393       0.000000       0.198368       0.098000   -9999.000000       0.056800       0.148000
57033     57033     shaanxi        108.8167       34.5500          102       155     2012      03        27        087              0.184292      16.790802       0.000000       0.192798       0.101000   -9999.000000   -9999.000000       0.218000
57033     57033     shaanxi        108.8167       34.5500          102       155     2012      03        28        088              0.182833      17.280853       0.716687       0.189150       0.151000   -9999.000000       0.075100       0.098000
57033     57033     shaanxi        108.8167       34.5500          102       155     2012      03        29        089              0.186625      12.997711       0.000000       0.199925       0.119000   -9999.000000       0.065900       0.157000
57033     57033     shaanxi        108.8167       34.5500          102       155     2012      03        30        090              0.184792      17.167908       0.000000       0.196788       0.096000   -9999.000000       0.051000   -9999.000000
57033     57033     shaanxi        108.8167       34.5500          102       155     2012      03        31        091              0.181500      13.841553       0.434907       0.189114       0.110500   -9999.000000       0.059600       0.092000
57033     57033     shaanxi        108.8167       34.5500          102       155     2012      04        01        092              0.179125      17.696014       0.000000       0.183489       0.128000   -9999.000000   -9999.000000       0.119000
57033     57033     shaanxi        108.8167       34.5500          102       155     2012      04        02        093              0.175500      19.042694       0.000000       0.180182   -9999.000000   -9999.000000   -9999.000000       0.232000
57033     57033     shaanxi        108.8167       34.5500          102       155     2012      04        03        094              0.171625      15.661469       0.000000       0.178544       0.122000   -9999.000000       0.035400       0.149000
57033     57033     shaanxi        108.8167       34.5500          102       155     2012      04        04        095              0.167375      17.188934       0.000000       0.175838       0.114000   -9999.000000       0.057800   -9999.000000
57033     57033     shaanxi        108.8167       34.5500          102       155     2012      04        05        096              0.164333      20.459839       0.000000       0.173170       0.118000   -9999.000000       0.052400       0.138000
57033     57033     shaanxi        108.8167       34.5500          102       155     2012      04        06        097              0.162042      19.008118       0.000000       0.171620       0.118000   -9999.000000       0.053700   -9999.000000
57033     57033     shaanxi        108.8167       34.5500          102       155     2012      04        07        098              0.160417      19.379456       0.000000       0.170771   -9999.000000   -9999.000000   -9999.000000       0.107000
57033     57033     shaanxi        108.8167       34.5500          102       155     2012      04        08        099              0.158500      20.920868       0.000000       0.169772       0.125000   -9999.000000       0.059400       0.093000
57033     57033     shaanxi        108.8167       34.5500          102       155     2012      04        09        100              0.156917      22.409729       0.053645       0.169130       0.124500   -9999.000000       0.041800   -9999.000000
57033     57033     shaanxi        108.8167       34.5500          102       155     2012      04        10        101              0.155000      18.470856       0.162645       0.171381       0.120500   -9999.000000       0.068900       0.158000
57033     57033     shaanxi        108.8167       34.5500          102       155     2012      04        11        102              0.153875      21.899597       3.574992       0.170423       0.131000   -9999.000000       0.065600   -9999.000000
57033     57033     shaanxi        108.8167       34.5500          102       155     2012      04        12        103              0.153125      19.667786       0.119256       0.179873       0.155000   -9999.000000       0.068900       0.063000
57033     57033     shaanxi        108.8167       34.5500          102       155     2012      04        13        104              0.154375      15.052155       0.000000       0.217485       0.155000   -9999.000000   -9999.000000   -9999.000000
57033     57033     shaanxi        108.8167       34.5500          102       155     2012      04        14        105              0.153375      18.832153       1.049626       0.193696       0.152000   -9999.000000       0.067500   -9999.000000
57033     57033     shaanxi        108.8167       34.5500          102       155     2012      04        15        106              0.152875      19.848389       0.000000       0.181530       0.131500   -9999.000000       0.067700       0.067000
57033     57033     shaanxi        108.8167       34.5500          102       155     2012      04        16        107              0.152167      22.350189       1.084525       0.174377       0.143000   -9999.000000       0.077100   -9999.000000
57033     57033     shaanxi        108.8167       34.5500          102       155     2012      04        17        108              0.150958      22.635834       0.236873       0.179751       0.129000   -9999.000000       0.084100       0.042000
57033     57033     shaanxi        108.8167       34.5500          102       155     2012      04        18        109              0.149042      19.929749       0.000000       0.182205       0.149000   -9999.000000   -9999.000000   -9999.000000
57033     57033     shaanxi        108.8167       34.5500          102       155     2012      04        19        110              0.147583      22.651825       2.304241       0.173655       0.146000   -9999.000000   -9999.000000       0.033000
57033     57033     shaanxi        108.8167       34.5500          102       155     2012      04        20        111              0.146875      20.191345       1.617515       0.192737       0.147000   -9999.000000       0.054300       0.121000
57033     57033     shaanxi        108.8167       34.5500          102       155     2012      04        21        112              0.145750      19.960480       0.000000       0.213322       0.163000   -9999.000000       0.087200   -9999.000000
57033     57033     shaanxi        108.8167       34.5500          102       155     2012      04        22        113              0.144792      23.455444       0.000000       0.192800       0.138000   -9999.000000   -9999.000000       0.155000
57033     57033     shaanxi        108.8167       34.5500          102       155     2012      04        23        114              0.144083      25.795593       1.205811       0.177328   -9999.000000   -9999.000000       0.097300   -9999.000000
57033     57033     shaanxi        108.8167       34.5500          102       155     2012      04        24        115              0.147542      23.747498       0.000000       0.182333       0.211000   -9999.000000   -9999.000000       0.364000
57033     57033     shaanxi        108.8167       34.5500          102       155     2012      04        25        116              0.000000      19.666168       0.633887       0.182855       0.155000   -9999.000000       0.106100       0.078000
57033     57033     shaanxi        108.8167       34.5500          102       155     2012      04        26        117              0.148000      21.506836       0.000000       0.171093       0.150500   -9999.000000       0.077300       0.167000
57033     57033     shaanxi        108.8167       34.5500          102       155     2012      04        27        118              0.146250      25.194519       0.000000       0.166455       0.136000   -9999.000000       0.087800       0.104000
57033     57033     shaanxi        108.8167       34.5500          102       155     2012      04        28        119              0.144333      27.329376       3.992847       0.164648   -9999.000000   -9999.000000       0.096100   -9999.000000
57033     57033     shaanxi        108.8167       34.5500          102       155     2012      04        29        120              0.142958      26.829437       0.000000       0.194742       0.175000   -9999.000000       0.092000       0.108000
57033     57033     shaanxi        108.8167       34.5500          102       155     2012      04        30        121              0.141292      25.350250       0.275391       0.201751       0.185500   -9999.000000   -9999.000000       0.369000
57033     57033     shaanxi        108.8167       34.5500          102       155     2012      05        01        122              0.141917      21.458282       0.070371       0.185463       0.195500   -9999.000000       0.114500       0.349000
57033     57033     shaanxi        108.8167       34.5500          102       155     2012      05        02        123              0.142750      19.476379       1.374344       0.183111       0.191000   -9999.000000       0.121400       0.707000
57033     57033     shaanxi        108.8167       34.5500          102       155     2012      05        03        124              0.144125      19.773529       0.533705       0.194531   -9999.000000   -9999.000000       0.102100   -9999.000000
57033     57033     shaanxi        108.8167       34.5500          102       155     2012      05        04        125              0.144792      21.209015       0.000000       0.197307       0.191000   -9999.000000       0.099200       0.199000
57033     57033     shaanxi        108.8167       34.5500          102       155     2012      05        05        126              0.144333      24.984863       0.000000       0.181436       0.182000   -9999.000000   -9999.000000   -9999.000000
57033     57033     shaanxi        108.8167       34.5500          102       155     2012      05        06        127              0.144750      27.636017       0.225504       0.169930       0.161500   -9999.000000   -9999.000000       0.238000
57033     57033     shaanxi        108.8167       34.5500          102       155     2012      05        07        128              0.144125      27.446472       1.066178       0.169050   -9999.000000   -9999.000000       0.076500       0.223000
57033     57033     shaanxi        108.8167       34.5500          102       155     2012      05        08        129              0.144542      25.730469       0.472082       0.178865       0.138000   -9999.000000       0.111900   -9999.000000
57033     57033     shaanxi        108.8167       34.5500          102       155     2012      05        09        130              0.143625      29.430023       0.000000       0.170038   -9999.000000   -9999.000000       0.107600       0.137000
57033     57033     shaanxi        108.8167       34.5500          102       155     2012      05        10        131              0.143167      27.827362      10.887490       0.168908       0.182000   -9999.000000       0.112200   -9999.000000
57033     57033     shaanxi        108.8167       34.5500          102       155     2012      05        11        132              0.151375      29.326202       2.724931       0.187584       0.222500   -9999.000000   -9999.000000       0.530000
57033     57033     shaanxi        108.8167       34.5500          102       155     2012      05        12        133              0.157708      21.241241       0.000000       0.288646       0.194500   -9999.000000       0.123800   -9999.000000
57033     57033     shaanxi        108.8167       34.5500          102       155     2012      05        13        134              0.156792      21.050507       0.441840       0.243151       0.169000   -9999.000000       0.104000   -9999.000000
57033     57033     shaanxi        108.8167       34.5500          102       155     2012      05        14        135              0.154167      19.678131       0.000000       0.228148   -9999.000000   -9999.000000       0.140300       0.072000
57033     57033     shaanxi        108.8167       34.5500          102       155     2012      05        15        136              0.149750      22.857330       0.000000       0.208731       0.200000   -9999.000000       0.129500   -9999.000000
57033     57033     shaanxi        108.8167       34.5500          102       155     2012      05        16        137              0.145583      24.813019       0.000000       0.190598       0.163000   -9999.000000       0.126100       0.298000
57033     57033     shaanxi        108.8167       34.5500          102       155     2012      05        17        138              0.142208      26.503723       0.000000       0.180244       0.156000   -9999.000000   -9999.000000   -9999.000000
57033     57033     shaanxi        108.8167       34.5500          102       155     2012      05        18        139              0.139542      26.872772       0.000000       0.175142       0.159000   -9999.000000       0.121200       0.303000
57033     57033     shaanxi        108.8167       34.5500          102       155     2012      05        19        140              0.137417      27.957947       2.175854       0.172603   -9999.000000   -9999.000000       0.130700       0.366000
57033     57033     shaanxi        108.8167       34.5500          102       155     2012      05        20        141              0.135167      30.005096       0.269162       0.170503   -9999.000000   -9999.000000       0.117000   -9999.000000
57033     57033     shaanxi        108.8167       34.5500          102       155     2012      05        21        142              0.140708      27.664856      14.844419       0.170705       0.265500   -9999.000000       0.173900       0.799000
57033     57033     shaanxi        108.8167       34.5500          102       155     2012      05        22        143              0.184208      19.526550       0.177084       0.285521       0.216000   -9999.000000   -9999.000000   -9999.000000
57033     57033     shaanxi        108.8167       34.5500          102       155     2012      05        23        144              0.188792      20.493896       0.368622       0.275025   -9999.000000   -9999.000000       0.159900       0.592000
57033     57033     shaanxi        108.8167       34.5500          102       155     2012      05        24        145              0.186250      20.308167       0.406765       0.254627       0.227000   -9999.000000       0.105000       0.482000
57033     57033     shaanxi        108.8167       34.5500          102       155     2012      05        25        146              0.000000      19.429932       0.925088       0.243624       0.215000   -9999.000000       0.148300       0.386000
57033     57033     shaanxi        108.8167       34.5500          102       155     2012      05        26        147              0.174375      22.967682       1.316410       0.225204       0.197000   -9999.000000       0.128700       0.306000
57033     57033     shaanxi        108.8167       34.5500          102       155     2012      05        27        148              0.164292      26.590759       0.000000       0.213680       0.172500   -9999.000000       0.127600   -9999.000000
57033     57033     shaanxi        108.8167       34.5500          102       155     2012      05        28        149              0.179125      28.783447      16.948929       0.194169       0.270000   -9999.000000   -9999.000000       0.880000
57033     57033     shaanxi        108.8167       34.5500          102       155     2012      05        29        150              0.235417      21.758392       0.792630       0.273972       0.198000   -9999.000000       0.148300       0.454000
57033     57033     shaanxi        108.8167       34.5500          102       155     2012      05        30        151              0.219000      24.260529       0.000000       0.282925   -9999.000000   -9999.000000       0.118400   -9999.000000
57033     57033     shaanxi        108.8167       34.5500          102       155     2012      05        31        152              0.202083      25.826508       0.000000       0.249179       0.203000   -9999.000000       0.126900   -9999.000000
57033     57033     shaanxi        108.8167       34.5500          102       155     2012      06        01        153              0.185083      23.407257       0.000000       0.235460       0.122500   -9999.000000       0.132300   -9999.000000
57033     57033     shaanxi        108.8167       34.5500          102       155     2012      06        02        154              0.168250      26.729095       0.000000       0.214549       0.138000   -9999.000000   -9999.000000       0.483000
57033     57033     shaanxi        108.8167       34.5500          102       155     2012      06        03        155              0.156000      27.464233       0.000000       0.199088       0.132000   -9999.000000   -9999.000000   -9999.000000
57033     57033     shaanxi        108.8167       34.5500          102       155     2012      06        04        156              0.148958      26.768158       0.000000       0.192291   -9999.000000   -9999.000000       0.176900       0.417000
57033     57033     shaanxi        108.8167       34.5500          102       155     2012      06        05        157              0.144250      28.855774       1.086914       0.185229       0.170000   -9999.000000       0.213600       0.441000
57033     57033     shaanxi        108.8167       34.5500          102       155     2012      06        06        158              0.141583      24.808533       0.000000       0.196553       0.138000   -9999.000000       0.194300   -9999.000000
57033     57033     shaanxi        108.8167       34.5500          102       155     2012      06        07        159              0.138750      26.905609       0.000000       0.189921       0.140500   -9999.000000       0.203700       0.397000
57033     57033     shaanxi        108.8167       34.5500          102       155     2012      06        08        160              0.135833      30.363800       1.396138       0.178311       0.137000   -9999.000000   -9999.000000   -9999.000000
57033     57033     shaanxi        108.8167       34.5500          102       155     2012      06        09        161              0.134292      29.284973       0.000000       0.174807       0.119000   -9999.000000       0.208800       0.423000
57033     57033     shaanxi        108.8167       34.5500          102       155     2012      06        10        162              0.131708      32.350311       0.000000       0.170817       0.143000   -9999.000000       0.139100   -9999.000000
57033     57033     shaanxi        108.8167       34.5500          102       155     2012      06        11        163              0.000000      32.471283       0.000000       0.168942       0.118500   -9999.000000       0.166400   -9999.000000
57033     57033     shaanxi        108.8167       34.5500          102       155     2012      06        12        164              0.127458      30.693024       0.000000       0.167507       0.127000   -9999.000000       0.162900       0.425000
57033     57033     shaanxi        108.8167       34.5500          102       155     2012      06        13        165              0.126583      32.825592       0.000000       0.165907       0.122000   -9999.000000       0.174100   -9999.000000
57033     57033     shaanxi        108.8167       34.5500          102       155     2012      06        14        166              0.124292      34.610870       0.000000       0.165115       0.125000   -9999.000000   -9999.000000       0.437000
57033     57033     shaanxi        108.8167       34.5500          102       155     2012      06        15        167              0.122917      30.403656       0.000000       0.164403       0.138000   -9999.000000       0.177000   -9999.000000
57033     57033     shaanxi        108.8167       34.5500          102       155     2012      06        16        168              0.121833      31.361115       0.000000       0.163999       0.126000   -9999.000000       0.172700       0.393000
57033     57033     shaanxi        108.8167       34.5500          102       155     2012      06        17        169              0.121167      32.150513       0.000000       0.162967       0.133500   -9999.000000       0.163900       0.516000
57033     57033     shaanxi        108.8167       34.5500          102       155     2012      06        18        170              0.120250      33.429504       1.309686       0.162671       0.158500   -9999.000000       0.150200   -9999.000000
57033     57033     shaanxi        108.8167       34.5500          102       155     2012      06        19        171              0.123000      31.746979       0.534040       0.171999       0.130000   -9999.000000   -9999.000000       0.409000
57033     57033     shaanxi        108.8167       34.5500          102       155     2012      06        20        172              0.112542      29.263916       0.000000       0.171585   -9999.000000   -9999.000000   -9999.000000   -9999.000000
57033     57033     shaanxi        108.8167       34.5500          102       155     2012      06        21        173              0.100875      32.728760       4.012254       0.164397       0.155000   -9999.000000       0.154600       0.352000
57033     57033     shaanxi        108.8167       34.5500          102       155     2012      06        22        174              0.103083      33.650146       0.000000       0.186397       0.127000   -9999.000000       0.159200       0.536000
57033     57033     shaanxi        108.8167       34.5500          102       155     2012      06        23        175              0.104833      32.146698       3.869656       0.190796       0.119000   -9999.000000       0.156500       0.489000
57033     57033     shaanxi        108.8167       34.5500          102       155     2012      06        24        176              0.105042      33.402191       0.354297       0.189414       0.126000   -9999.000000       0.169300       0.574000
57033     57033     shaanxi        108.8167       34.5500          102       155     2012      06        25        177              0.104208      30.596954       4.699150       0.204024   -9999.000000   -9999.000000   -9999.000000   -9999.000000
57033     57033     shaanxi        108.8167       34.5500          102       155     2012      06        26        178              0.104833      26.451508       0.320114       0.242486       0.179000   -9999.000000       0.173000       0.637000
57033     57033     shaanxi        108.8167       34.5500          102       155     2012      06        27        179              0.105708      25.837006       0.569368       0.221272       0.151000   -9999.000000       0.125600       0.615000
57033     57033     shaanxi        108.8167       34.5500          102       155     2012      06        28        180              0.105375      27.142303       0.791286       0.201464       0.140500   -9999.000000       0.183700       0.478000
57033     57033     shaanxi        108.8167       34.5500          102       155     2012      06        29        181              0.170667      27.710205      14.729984       0.192302       0.191000   -9999.000000       0.200500   -9999.000000
57033     57033     shaanxi        108.8167       34.5500          102       155     2012      06        30        182              0.191875      24.674103       0.086660       0.307314       0.162000   -9999.000000       0.168300   -9999.000000
57033     57033     shaanxi        108.8167       34.5500          102       155     2012      07        01        183              0.185583      28.508636       0.796658       0.252994   -9999.000000   -9999.000000   -9999.000000       0.565000
57033     57033     shaanxi        108.8167       34.5500          102       155     2012      07        02        184              0.212542      30.891388       6.027312       0.223582       0.187000   -9999.000000       0.168800   -9999.000000
57033     57033     shaanxi        108.8167       34.5500          102       155     2012      07        03        185              0.215708      24.374390       0.474407       0.274875       0.143000   -9999.000000       0.150700       0.619000
57033     57033     shaanxi        108.8167       34.5500          102       155     2012      07        04        186              0.227417      29.999573       4.078530       0.239389       0.172000   -9999.000000       0.179700       0.790000
57033     57033     shaanxi        108.8167       34.5500          102       155     2012      07        05        187              0.224292      26.499786       0.275738       0.265380       0.141000   -9999.000000       0.162200   -9999.000000
57033     57033     shaanxi        108.8167       34.5500          102       155     2012      07        06        188              0.208667      30.197266       0.000000       0.229677   -9999.000000   -9999.000000   -9999.000000       0.651000
57033     57033     shaanxi        108.8167       34.5500          102       155     2012      07        07        189              0.194708      30.473511       0.847001       0.207460   -9999.000000   -9999.000000   -9999.000000   -9999.000000
57033     57033     shaanxi        108.8167       34.5500          102       155     2012      07        08        190              0.198750      28.823303      19.525322       0.202145       0.194000   -9999.000000       0.138400       1.000000
57033     57033     shaanxi        108.8167       34.5500          102       155     2012      07        09        191              0.250375      25.652557      10.082812       0.316278       0.200000   -9999.000000       0.185800   -9999.000000
57033     57033     shaanxi        108.8167       34.5500          102       155     2012      07        10        192              0.239083      25.074280       0.372201       0.332928       0.158000   -9999.000000       0.166700   -9999.000000
57033     57033     shaanxi        108.8167       34.5500          102       155     2012      07        11        193              0.219583      30.379333       1.020066       0.288349   -9999.000000   -9999.000000       0.155300       0.733000
57033     57033     shaanxi        108.8167       34.5500          102       155     2012      07        12        194              0.200458      30.685516       0.210490       0.262436       0.189000   -9999.000000   -9999.000000   -9999.000000
57033     57033     shaanxi        108.8167       34.5500          102       155     2012      07        13        195              0.184833      31.528076       1.216382       0.240231       0.170500   -9999.000000       0.159600       0.656000
57033     57033     shaanxi        108.8167       34.5500          102       155     2012      07        14        196              0.169125      29.780365       0.268980       0.234201       0.172500   -9999.000000       0.117200   -9999.000000
57033     57033     shaanxi        108.8167       34.5500          102       155     2012      07        15        197              0.156375      28.959442       0.354160       0.223650       0.170000   -9999.000000       0.147100       0.527000
57033     57033     shaanxi        108.8167       34.5500          102       155     2012      07        16        198              0.144375      30.177643       0.721093       0.211291       0.166000   -9999.000000       0.162200       0.683000
57033     57033     shaanxi        108.8167       34.5500          102       155     2012      07        17        199              0.134417      30.198730       0.000000       0.201085       0.182000   -9999.000000       0.145100   -9999.000000
57033     57033     shaanxi        108.8167       34.5500          102       155     2012      07        18        200              0.127500      29.981445       0.000000       0.193110       0.176000   -9999.000000   -9999.000000       0.596000
57033     57033     shaanxi        108.8167       34.5500          102       155     2012      07        19        201              0.121458      31.243591       0.000000       0.187084       0.157500   -9999.000000       0.146600   -9999.000000
57033     57033     shaanxi        108.8167       34.5500          102       155     2012      07        20        202              0.117087      30.997925       0.000000       0.183892       0.177000   -9999.000000       0.147900       0.431000
57033     57033     shaanxi        108.8167       34.5500          102       155     2012      07        21        203              0.112913      31.725250       3.815047       0.181441   -9999.000000   -9999.000000       0.150100       0.806000
57033     57033     shaanxi        108.8167       34.5500          102       155     2012      07        22        204              0.112083      27.985748       0.881149       0.213933   -9999.000000   -9999.000000       0.148100       0.665000
57033     57033     shaanxi        108.8167       34.5500          102       155     2012      07        23        205              0.109000      30.697571       1.535197       0.205044   -9999.000000   -9999.000000   -9999.000000       0.738000
57033     57033     shaanxi        108.8167       34.5500          102       155     2012      07        24        206              0.109750      27.161499       1.556841       0.204296       0.180500   -9999.000000   -9999.000000   -9999.000000
57033     57033     shaanxi        108.8167       34.5500          102       155     2012      07        25        207              0.109667      29.743561       0.649690       0.200520       0.172500   -9999.000000       0.099700       0.486000
57033     57033     shaanxi        108.8167       34.5500          102       155     2012      07        26        208              0.108875      31.211487       0.000000       0.193519       0.177000       0.113600       0.130600       0.632000
57033     57033     shaanxi        108.8167       34.5500          102       155     2012      07        27        209              0.045292      35.015625       0.788666       0.181032       0.160000   -9999.000000       0.122600       0.545000
57033     57033     shaanxi        108.8167       34.5500          102       155     2012      07        28        210              0.034583      35.650452       1.081001       0.174643       0.191000   -9999.000000       0.122200       0.501000
57033     57033     shaanxi        108.8167       34.5500          102       155     2012      07        29        211              0.032083      37.007965       0.000000       0.170722       0.165500   -9999.000000   -9999.000000   -9999.000000
57033     57033     shaanxi        108.8167       34.5500          102       155     2012      07        30        212              0.028833      37.596313       0.255933       0.168603       0.195500   -9999.000000       0.110000       0.539000
57033     57033     shaanxi        108.8167       34.5500          102       155     2012      07        31        213              0.025833      34.115875       0.362411       0.169802       0.195000   -9999.000000       0.090600   -9999.000000
57033     57033     shaanxi        108.8167       34.5500          102       155     2012      08        01        214              0.023542      30.691925       0.284904       0.169294       0.186000   -9999.000000       0.114900       0.573000
57033     57033     shaanxi        108.8167       34.5500          102       155     2012      08        02        215              0.023208      29.258606       0.740583       0.169619       0.234000   -9999.000000       0.101800       0.384000
57033     57033     shaanxi        108.8167       34.5500          102       155     2012      08        03        216              0.023000      31.914368       0.866266       0.167378       0.226000   -9999.000000   -9999.000000   -9999.000000
57033     57033     shaanxi        108.8167       34.5500          102       155     2012      08        04        217              0.021917      33.040314       0.000000       0.165774       0.188000   -9999.000000   -9999.000000       0.529000
57033     57033     shaanxi        108.8167       34.5500          102       155     2012      08        05        218              0.020292      33.078430       1.759381       0.164348       0.210500   -9999.000000       0.098000   -9999.000000
57033     57033     shaanxi        108.8167       34.5500          102       155     2012      08        06        219              0.019417      31.044983       1.002866       0.169852       0.199000   -9999.000000       0.088800       0.555000
57033     57033     shaanxi        108.8167       34.5500          102       155     2012      08        07        220              0.019000      31.707855       0.300276       0.169427   -9999.000000   -9999.000000       0.079900   -9999.000000
57033     57033     shaanxi        108.8167       34.5500          102       155     2012      08        08        221              0.017708      34.011505       1.917640       0.164521       0.225000       0.130400       0.086100   -9999.000000
57033     57033     shaanxi        108.8167       34.5500          102       155     2012      08        09        222              0.016375      32.472290       0.492022       0.181424       0.233000   -9999.000000   -9999.000000       0.553000
57033     57033     shaanxi        108.8167       34.5500          102       155     2012      08        10        223              0.016125      31.652374       0.000000       0.177735       0.213000   -9999.000000   -9999.000000   -9999.000000
57033     57033     shaanxi        108.8167       34.5500          102       155     2012      08        11        224              0.015292      32.345490       0.777934       0.168956       0.204000   -9999.000000       0.055000       0.524000
57033     57033     shaanxi        108.8167       34.5500          102       155     2012      08        12        225              0.014042      34.210449       3.759360       0.164212       0.187000   -9999.000000       0.100100   -9999.000000
57033     57033     shaanxi        108.8167       34.5500          102       155     2012      08        13        226              0.012083      31.492035       0.931847       0.193136       0.246000   -9999.000000       0.119700       0.751000
57033     57033     shaanxi        108.8167       34.5500          102       155     2012      08        14        227              0.012083      26.033356       1.304778       0.209654       0.284000   -9999.000000       0.112100       0.668000
57033     57033     shaanxi        108.8167       34.5500          102       155     2012      08        15        228              0.013208      25.954987       0.000000       0.208451       0.224000   -9999.000000   -9999.000000   -9999.000000
57033     57033     shaanxi        108.8167       34.5500          102       155     2012      08        16        229              0.014333      28.837128       0.000000       0.188486       0.225500   -9999.000000       0.105900       0.532000
57033     57033     shaanxi        108.8167       34.5500          102       155     2012      08        17        230              0.014042      30.565277      15.090361       0.175849       0.204000   -9999.000000       0.114100   -9999.000000
57033     57033     shaanxi        108.8167       34.5500          102       155     2012      08        18        231              0.020217      29.604218       3.377374       0.231808   -9999.000000       0.208500       0.136600       0.966000
57033     57033     shaanxi        108.8167       34.5500          102       155     2012      08        19        232              0.126958      24.415771      18.767826       0.293007       0.283000   -9999.000000       0.140200       0.917000
57033     57033     shaanxi        108.8167       34.5500          102       155     2012      08        20        233              0.156250      22.807465       0.283904       0.336721       0.282000   -9999.000000   -9999.000000       0.769000
57033     57033     shaanxi        108.8167       34.5500          102       155     2012      08        21        234              0.148042      23.905792       3.655968       0.302332       0.222000   -9999.000000   -9999.000000       0.990000
57033     57033     shaanxi        108.8167       34.5500          102       155     2012      08        22        235              0.136333      24.998016       0.000000       0.277626       0.193000   -9999.000000       0.105400   -9999.000000
57033     57033     shaanxi        108.8167       34.5500          102       155     2012      08        23        236              0.125667      25.531616       0.000000       0.254892       0.181000       0.186900       0.128400       0.522000
57033     57033     shaanxi        108.8167       34.5500          102       155     2012      08        24        237              0.118500      25.726257       0.000000       0.236723   -9999.000000   -9999.000000       0.109400   -9999.000000
57033     57033     shaanxi        108.8167       34.5500          102       155     2012      08        25        238              0.000000      27.014191       2.869282       0.221336   -9999.000000       0.146500       0.114400   -9999.000000
57033     57033     shaanxi        108.8167       34.5500          102       155     2012      08        26        239              0.168708      27.536102       0.000000       0.222238       0.209500       0.217700   -9999.000000       0.569000
57033     57033     shaanxi        108.8167       34.5500          102       155     2012      08        27        240              0.153458      26.826416       0.768717       0.234561       0.236000   -9999.000000       0.140700   -9999.000000
57033     57033     shaanxi        108.8167       34.5500          102       155     2012      08        28        241              0.149833      27.297638       0.000000       0.220450       0.183000   -9999.000000       0.092800       0.628000
57033     57033     shaanxi        108.8167       34.5500          102       155     2012      08        29        242              0.141750      28.931488       0.000000       0.205503       0.201000   -9999.000000       0.120100   -9999.000000
57033     57033     shaanxi        108.8167       34.5500          102       155     2012      08        30        243              0.133208      30.673950      10.329316       0.190792   -9999.000000   -9999.000000       0.104700       0.565000
57033     57033     shaanxi        108.8167       34.5500          102       155     2012      08        31        244              0.222542      30.202057      30.916538       0.212113   -9999.000000       0.083000       0.137400       1.000000
57033     57033     shaanxi        108.8167       34.5500          102       155     2012      09        01        245              0.221875      22.455750      18.943110       0.360328       0.257000   -9999.000000   -9999.000000   -9999.000000
57033     57033     shaanxi        108.8167       34.5500          102       155     2012      09        02        246              0.191708      20.312775       0.000000       0.368563       0.224000   -9999.000000       0.143500       0.741000
57033     57033     shaanxi        108.8167       34.5500          102       155     2012      09        03        247              0.177625      23.115631       0.000000       0.330215   -9999.000000   -9999.000000       0.128800   -9999.000000
57033     57033     shaanxi        108.8167       34.5500          102       155     2012      09        04        248              0.164458      24.708984       0.000000       0.311337       0.223000   -9999.000000       0.112400       0.664000
57033     57033     shaanxi        108.8167       34.5500          102       155     2012      09        05        249              0.156208      25.089142       0.000000       0.296751       0.185500       0.064700       0.114000   -9999.000000
57033     57033     shaanxi        108.8167       34.5500          102       155     2012      09        06        250              0.147250      26.371216       1.002384       0.283659       0.191500   -9999.000000   -9999.000000   -9999.000000
57033     57033     shaanxi        108.8167       34.5500          102       155     2012      09        07        251              0.176125      25.415955      39.229713       0.273506       0.205000   -9999.000000   -9999.000000       1.000000
57033     57033     shaanxi        108.8167       34.5500          102       155     2012      09        08        252              0.204958      23.956512       3.220439       0.337873       0.278000   -9999.000000       0.101800   -9999.000000
57033     57033     shaanxi        108.8167       34.5500          102       155     2012      09        09        253              0.187167      22.688324       0.000000       0.363272       0.221000   -9999.000000       0.132100       0.769000
57033     57033     shaanxi        108.8167       34.5500          102       155     2012      09        10        254              0.214792      23.525238      26.929516       0.338619       0.277000       0.101900       0.169300   -9999.000000
57033     57033     shaanxi        108.8167       34.5500          102       155     2012      09        11        255              0.195750      20.078064       0.222246       0.383897       0.197000   -9999.000000       0.150200       0.999000
57033     57033     shaanxi        108.8167       34.5500          102       155     2012      09        12        256              0.181958      22.390259       0.000000       0.354204       0.219000       0.151000   -9999.000000       0.597000
57033     57033     shaanxi        108.8167       34.5500          102       155     2012      09        13        257              0.170625      19.567139       0.000000       0.340424       0.164000   -9999.000000       0.137100   -9999.000000
57033     57033     shaanxi        108.8167       34.5500          102       155     2012      09        14        258              0.161875      19.600769       0.000000       0.329344   -9999.000000   -9999.000000       0.085600       0.591000
57033     57033     shaanxi        108.8167       34.5500          102       155     2012      09        15        259              0.164167      20.620605       7.987678       0.320521       0.229000   -9999.000000       0.155800   -9999.000000
57033     57033     shaanxi        108.8167       34.5500          102       155     2012      09        16        260              0.175542      20.039703       0.136269       0.335025       0.204000   -9999.000000       0.153600       0.790000
57033     57033     shaanxi        108.8167       34.5500          102       155     2012      09        17        261              0.171667      18.278473       0.000000       0.332652       0.192500   -9999.000000       0.127400       0.714000
57033     57033     shaanxi        108.8167       34.5500          102       155     2012      09        18        262              0.164292      20.930054       0.122389       0.322232       0.171000   -9999.000000   -9999.000000       0.709000
57033     57033     shaanxi        108.8167       34.5500          102       155     2012      09        19        263              0.155500      22.217255       0.000000       0.314331       0.155000   -9999.000000       0.119300       0.635000
57033     57033     shaanxi        108.8167       34.5500          102       155     2012      09        20        264              0.151625      22.845367       2.430238       0.305986       0.227000   -9999.000000       0.136600   -9999.000000
57033     57033     shaanxi        108.8167       34.5500          102       155     2012      09        21        265              0.162167      20.255615       0.000000       0.313833   -9999.000000   -9999.000000       0.119600       0.658000
57033     57033     shaanxi        108.8167       34.5500          102       155     2012      09        22        266              0.158000      21.400543       0.000000       0.309212       0.153500   -9999.000000       0.121900       0.627000
57033     57033     shaanxi        108.8167       34.5500          102       155     2012      09        23        267              0.153708      21.541840       0.000000       0.304007       0.158500   -9999.000000   -9999.000000       0.626000
57033     57033     shaanxi        108.8167       34.5500          102       155     2012      09        24        268              0.146667      22.062775       0.954985       0.299190       0.144000   -9999.000000   -9999.000000       0.596000
57033     57033     shaanxi        108.8167       34.5500          102       155     2012      09        25        269              0.166125      22.087158       7.818132       0.294563   -9999.000000   -9999.000000       0.112500   -9999.000000
57033     57033     shaanxi        108.8167       34.5500          102       155     2012      09        26        270              0.178250      19.220978       0.000000       0.328087       0.182000   -9999.000000       0.165600       0.648000
57033     57033     shaanxi        108.8167       34.5500          102       155     2012      09        27        271              0.172357      19.729401       4.591941       0.314401       0.147500   -9999.000000       0.141400   -9999.000000
57033     57033     shaanxi        108.8167       34.5500          102       155     2012      09        28        272              0.155067      20.278351       0.542431       0.304134       0.143500   -9999.000000       0.141000       0.608000
57033     57033     shaanxi        108.8167       34.5500          102       155     2012      09        29        273              0.147167      18.057648       0.000000       0.294951       0.141000   -9999.000000   -9999.000000       0.431000
57033     57033     shaanxi        108.8167       34.5500          102       155     2012      09        30        274              0.137375      19.055359       0.000000       0.289281   -9999.000000   -9999.000000       0.141600   -9999.000000
57033     57033     shaanxi        108.8167       34.5500          102       155     2012      10        01        275              0.126125      19.549561       0.000000       0.283496       0.146000   -9999.000000       0.086600       0.615000
57033     57033     shaanxi        108.8167       34.5500          102       155     2012      10        02        276              0.121083      20.163849       1.647509       0.277378       0.181000   -9999.000000       0.119800   -9999.000000
57033     57033     shaanxi        108.8167       34.5500          102       155     2012      10        03        277              0.121833      18.163513       0.000000       0.287931       0.143000       0.144300       0.119600       0.684000
57033     57033     shaanxi        108.8167       34.5500          102       155     2012      10        04        278              0.119458      20.684692       0.807605       0.282670       0.144000   -9999.000000       0.112900   -9999.000000
57033     57033     shaanxi        108.8167       34.5500          102       155     2012      10        05        279              0.115833      19.194000       0.000000       0.278674       0.143000   -9999.000000   -9999.000000   -9999.000000
57033     57033     shaanxi        108.8167       34.5500          102       155     2012      10        06        280              0.108958      19.985138       0.746914       0.273218       0.150000       0.187300       0.099700       0.618000
57033     57033     shaanxi        108.8167       34.5500          102       155     2012      10        07        281              0.104375      18.519745       0.000000       0.270243       0.162000   -9999.000000       0.110400   -9999.000000
57033     57033     shaanxi        108.8167       34.5500          102       155     2012      10        08        282              0.103292      17.542328       1.543167       0.270200       0.171000   -9999.000000       0.114800       0.775000
57033     57033     shaanxi        108.8167       34.5500          102       155     2012      10        09        283              0.101958      16.826324       0.000000       0.281114       0.150000   -9999.000000       0.105400   -9999.000000
57033     57033     shaanxi        108.8167       34.5500          102       155     2012      10        10        284              0.096208      18.375000       0.000000       0.271438       0.132000   -9999.000000   -9999.000000       0.564000
57033     57033     shaanxi        108.8167       34.5500          102       155     2012      10        11        285              0.091292      18.457703       0.000000       0.264488   -9999.000000       0.065200       0.106500       0.595000
57033     57033     shaanxi        108.8167       34.5500          102       155     2012      10        12        286              0.088208      17.990021       0.000000       0.262532       0.122000   -9999.000000       0.065200   -9999.000000
57033     57033     shaanxi        108.8167       34.5500          102       155     2012      10        13        287              0.084208      18.358032       0.137929       0.261972       0.111000   -9999.000000       0.107900       0.630000
57033     57033     shaanxi        108.8167       34.5500          102       155     2012      10        14        288              0.078167      19.566345       0.000000       0.256394       0.118500   -9999.000000       0.098800   -9999.000000
57033     57033     shaanxi        108.8167       34.5500          102       155     2012      10        15        289              0.073833      17.946259       2.255463       0.252336       0.120000       0.120600       0.114700       0.391000
57033     57033     shaanxi        108.8167       34.5500          102       155     2012      10        16        290              0.073208      16.208252       0.649426       0.259096       0.119000   -9999.000000   -9999.000000       0.551000
57033     57033     shaanxi        108.8167       34.5500          102       155     2012      10        17        291              0.071625      14.412140       0.000000       0.271798       0.123000   -9999.000000       0.111900       0.551000
57033     57033     shaanxi        108.8167       34.5500          102       155     2012      10        18        292              0.070833      14.560150       0.000000       0.259043       0.119000   -9999.000000       0.098600       0.458000
57033     57033     shaanxi        108.8167       34.5500          102       155     2012      10        19        293              0.069625      12.767731       0.000000       0.258253       0.116000       0.199800       0.101600   -9999.000000
57033     57033     shaanxi        108.8167       34.5500          102       155     2012      10        20        294              0.067125      15.869507       0.000000       0.254761       0.129000   -9999.000000       0.113600       0.436000
57033     57033     shaanxi        108.8167       34.5500          102       155     2012      10        21        295              0.065750      17.455170       1.076915       0.250393   -9999.000000       0.067500   -9999.000000       0.600000
57033     57033     shaanxi        108.8167       34.5500          102       155     2012      10        22        296              0.064750      12.526459       0.000000       0.259976   -9999.000000   -9999.000000   -9999.000000       0.616000
57033     57033     shaanxi        108.8167       34.5500          102       155     2012      10        23        297              0.064000      13.610962       0.231656       0.252785   -9999.000000   -9999.000000       0.104200       0.544000
57033     57033     shaanxi        108.8167       34.5500          102       155     2012      10        24        298              0.063625      10.414764       0.000000       0.254651   -9999.000000       0.153400       0.122700   -9999.000000
57033     57033     shaanxi        108.8167       34.5500          102       155     2012      10        25        299              0.000000      13.798492       0.000000       0.250611       0.140000   -9999.000000       0.105700       0.460000
57033     57033     shaanxi        108.8167       34.5500          102       155     2012      10        26        300              0.060542      14.880341       0.000000       0.246282       0.129000   -9999.000000       0.114700   -9999.000000
57033     57033     shaanxi        108.8167       34.5500          102       155     2012      10        27        301              0.057375      15.730957       0.000000       0.242373   -9999.000000   -9999.000000   -9999.000000       0.488000
57033     57033     shaanxi        108.8167       34.5500          102       155     2012      10        28        302              0.000000      15.380188       0.343934       0.238891       0.167000   -9999.000000       0.131900       0.387000
57033     57033     shaanxi        108.8167       34.5500          102       155     2012      10        29        303              0.055542      14.569489       0.203935       0.239183       0.136000       0.030100       0.073300   -9999.000000
57033     57033     shaanxi        108.8167       34.5500          102       155     2012      10        30        304              0.052333      14.191101       0.205671       0.242127       0.119000   -9999.000000       0.113300       0.405000
57033     57033     shaanxi        108.8167       34.5500          102       155     2012      10        31        305              0.049375      12.715454       0.000000       0.236385       0.128000   -9999.000000       0.101300   -9999.000000
57033     57033     shaanxi        108.8167       34.5500          102       155     2012      11        01        306              0.047292      12.468750       0.000000       0.231951       0.119000   -9999.000000       0.104600       0.522000
57033     57033     shaanxi        108.8167       34.5500          102       155     2012      11        02        307              0.045625      11.730927       0.000000       0.230199       0.148000   -9999.000000   -9999.000000   -9999.000000
57033     57033     shaanxi        108.8167       34.5500          102       155     2012      11        03        308              0.043042      13.214874       0.000000       0.227565   -9999.000000   -9999.000000       0.102500   -9999.000000
57033     57033     shaanxi        108.8167       34.5500          102       155     2012      11        04        309              0.040208       8.537598       0.000000       0.223396       0.112000   -9999.000000       0.111300       0.331000
57033     57033     shaanxi        108.8167       34.5500          102       155     2012      11        05        310              0.038500       7.971008       0.000000       0.221399       0.123000   -9999.000000       0.086700   -9999.000000
57033     57033     shaanxi        108.8167       34.5500          102       155     2012      11        06        311              0.037458       8.046326       0.000000       0.220579       0.125000   -9999.000000       0.098300       0.464000
57033     57033     shaanxi        108.8167       34.5500          102       155     2012      11        07        312              0.036917       9.437073       9.029495       0.220515   -9999.000000   -9999.000000   -9999.000000   -9999.000000
57033     57033     shaanxi        108.8167       34.5500          102       155     2012      11        08        313              0.036167       8.066711       0.000000       0.223997       0.139000   -9999.000000   -9999.000000       0.399000
57033     57033     shaanxi        108.8167       34.5500          102       155     2012      11        09        314              0.036000      10.127960       0.306636       0.223804       0.153500   -9999.000000       0.084200       0.489000
57033     57033     shaanxi        108.8167       34.5500          102       155     2012      11        10        315              0.035500       8.849487       0.000000       0.226558       0.120000   -9999.000000       0.103700   -9999.000000
57033     57033     shaanxi        108.8167       34.5500          102       155     2012      11        11        316              0.034500       6.248901       0.000000       0.225775       0.129000   -9999.000000       0.092300       0.333000
57033     57033     shaanxi        108.8167       34.5500          102       155     2012      11        12        317              0.034250       6.847748       0.000000       0.223218       0.128000   -9999.000000       0.084200   -9999.000000
57033     57033     shaanxi        108.8167       34.5500          102       155     2012      11        13        318              0.000000       8.097046       0.000000       0.222023   -9999.000000   -9999.000000   -9999.000000       0.238000
57033     57033     shaanxi        108.8167       34.5500          102       155     2012      11        14        319              0.033125       8.342194       0.552813       0.220360       0.143000   -9999.000000       0.086500       0.425000
57033     57033     shaanxi        108.8167       34.5500          102       155     2012      11        15        320              0.033583       7.733307       0.507462       0.220179   -9999.000000   -9999.000000       0.068000       0.321000
57033     57033     shaanxi        108.8167       34.5500          102       155     2012      11        16        321              0.034000       5.505219       0.000000       0.229616       0.137000   -9999.000000       0.093700       0.354000
57033     57033     shaanxi        108.8167       34.5500          102       155     2012      11        17        322              0.000000       7.696594       0.000000       0.227741       0.127000   -9999.000000       0.084000   -9999.000000
57033     57033     shaanxi        108.8167       34.5500          102       155     2012      11        18        323              0.034042       7.950684       0.000000       0.225014   -9999.000000   -9999.000000       0.083200       0.214000
57033     57033     shaanxi        108.8167       34.5500          102       155     2012      11        19        324              0.034000       8.903839       0.000000       0.222776       0.152000   -9999.000000   -9999.000000       0.398000
57033     57033     shaanxi        108.8167       34.5500          102       155     2012      11        20        325              0.034000       7.944977       0.000000       0.221744       0.127000   -9999.000000       0.070500       0.336000
57033     57033     shaanxi        108.8167       34.5500          102       155     2012      11        21        326              0.034292       6.791687       0.000000       0.223702       0.120500   -9999.000000       0.078900       0.333000
57033     57033     shaanxi        108.8167       34.5500          102       155     2012      11        22        327              0.033833       8.891937       0.000000       0.223653       0.123000   -9999.000000       0.068900   -9999.000000
57033     57033     shaanxi        108.8167       34.5500          102       155     2012      11        23        328              0.032667       7.090820       0.000000       0.221504   -9999.000000   -9999.000000       0.071400       0.194000
57033     57033     shaanxi        108.8167       34.5500          102       155     2012      11        24        329              0.032083       6.070618       0.674740       0.217375   -9999.000000   -9999.000000   -9999.000000   -9999.000000
57033     57033     shaanxi        108.8167       34.5500          102       155     2012      11        25        330              0.035708       4.615845       0.579181       0.219623   -9999.000000   -9999.000000       0.076000       0.526000
57033     57033     shaanxi        108.8167       34.5500          102       155     2012      11        26        331              0.039625       4.115997       0.000000       0.225887       0.126000   -9999.000000   -9999.000000       0.295000
57033     57033     shaanxi        108.8167       34.5500          102       155     2012      11        27        332              0.042250       4.473114       0.000000       0.221036       0.134000   -9999.000000       0.069500   -9999.000000
57033     57033     shaanxi        108.8167       34.5500          102       155     2012      11        28        333              0.043667       5.271362       0.000000       0.222195   -9999.000000   -9999.000000       0.062000       0.119000
57033     57033     shaanxi        108.8167       34.5500          102       155     2012      11        29        334              0.044000       2.706268       0.000000       0.213704   -9999.000000   -9999.000000       0.064900   -9999.000000
57033     57033     shaanxi        108.8167       34.5500          102       155     2012      11        30        335              0.044875       1.815552       0.000000       0.208687   -9999.000000   -9999.000000   -9999.000000       0.423000
57033     57033     shaanxi        108.8167       34.5500          102       155     2012      12        01        336              0.045792       2.305603       0.083042       0.214053   -9999.000000   -9999.000000       0.071400   -9999.000000
57033     57033     shaanxi        108.8167       34.5500          102       155     2012      12        02        337              0.046792       2.471436       0.000000       0.216843   -9999.000000   -9999.000000       0.055100   -9999.000000
57033     57033     shaanxi        108.8167       34.5500          102       155     2012      12        03        338              0.047000       2.015259       0.000000       0.218577       0.134000   -9999.000000       0.072400       0.232000
57033     57033     shaanxi        108.8167       34.5500          102       155     2012      12        04        339              0.047792       3.741302       0.000000       0.215751   -9999.000000   -9999.000000       0.064100   -9999.000000
57033     57033     shaanxi        108.8167       34.5500          102       155     2012      12        05        340              0.047500       4.990143       0.000000       0.218326   -9999.000000   -9999.000000   -9999.000000       0.233000
57033     57033     shaanxi        108.8167       34.5500          102       155     2012      12        06        341              0.047000       4.364197       0.000000       0.213471       0.121000   -9999.000000   -9999.000000   -9999.000000
57033     57033     shaanxi        108.8167       34.5500          102       155     2012      12        07        342              0.046708       4.938965       0.000000       0.215027       0.122000   -9999.000000       0.047400       0.247000
57033     57033     shaanxi        108.8167       34.5500          102       155     2012      12        08        343              0.045917       5.101471       0.000000       0.212732       0.126000   -9999.000000       0.062800       0.170000
57033     57033     shaanxi        108.8167       34.5500          102       155     2012      12        09        344              0.045292       2.326447       0.000000       0.204103   -9999.000000       0.021500       0.054500   -9999.000000
57033     57033     shaanxi        108.8167       34.5500          102       155     2012      12        10        345              0.045000       1.538574       0.000000       0.201543   -9999.000000   -9999.000000       0.056600       0.209000
57033     57033     shaanxi        108.8167       34.5500          102       155     2012      12        11        346              0.044792       2.317841       0.000000       0.203694   -9999.000000   -9999.000000   -9999.000000   -9999.000000
57033     57033     shaanxi        108.8167       34.5500          102       155     2012      12        12        347              0.044042       0.752319       0.000000       0.199032   -9999.000000   -9999.000000       0.066300       0.018000
57033     57033     shaanxi        108.8167       34.5500          102       155     2012      12        13        348              0.044000       0.706879       0.000000       0.200058   -9999.000000   -9999.000000       0.021600       0.334000
57033     57033     shaanxi        108.8167       34.5500          102       155     2012      12        14        349              0.044208       0.302063       0.000000       0.201691       0.116000   -9999.000000       0.067300       0.155000
57033     57033     shaanxi        108.8167       34.5500          102       155     2012      12        15        350              0.000000       1.320404       0.000000       0.206876   -9999.000000   -9999.000000       0.062400       0.318000
57033     57033     shaanxi        108.8167       34.5500          102       155     2012      12        16        351              0.044000       0.777924       0.000000       0.207525       0.135000   -9999.000000       0.059300   -9999.000000
57033     57033     shaanxi        108.8167       34.5500          102       155     2012      12        17        352              0.043750       1.705536       0.000000       0.213311       0.102000   -9999.000000   -9999.000000       0.234000
57033     57033     shaanxi        108.8167       34.5500          102       155     2012      12        18        353              0.042792       2.197937       0.000000       0.212624       0.106000   -9999.000000       0.055900       0.119000
57033     57033     shaanxi        108.8167       34.5500          102       155     2012      12        19        354              0.042500       1.664337       0.000000       0.206913       0.116000   -9999.000000       0.057100       0.131000
57033     57033     shaanxi        108.8167       34.5500          102       155     2012      12        20        355              0.000000       1.185608       0.150205       0.207468   -9999.000000   -9999.000000       0.052600       0.352000
57033     57033     shaanxi        108.8167       34.5500          102       155     2012      12        21        356              0.042875      -0.181396       0.123295       0.201478   -9999.000000   -9999.000000       0.056200   -9999.000000
57033     57033     shaanxi        108.8167       34.5500          102       155     2012      12        22        357              0.043167       0.795563       0.000000       0.205356   -9999.000000       0.047900   -9999.000000       0.085000
57033     57033     shaanxi        108.8167       34.5500          102       155     2012      12        23        358              0.042792      -0.529846       0.000000       0.196866   -9999.000000   -9999.000000   -9999.000000   -9999.000000
57033     57033     shaanxi        108.8167       34.5500          102       155     2012      12        24        359              0.041444      -3.032074       0.000000       0.179854   -9999.000000   -9999.000000       0.019000       0.007000
57033     57033     shaanxi        108.8167       34.5500          102       155     2012      12        25        360              0.040292      -2.124664       0.000000       0.184359   -9999.000000   -9999.000000       0.054800       0.012000
57033     57033     shaanxi        108.8167       34.5500          102       155     2012      12        26        361              0.000000      -1.245422       0.145038       0.188679   -9999.000000   -9999.000000       0.046600   -9999.000000
57033     57033     shaanxi        108.8167       34.5500          102       155     2012      12        27        362              0.038700      -2.324890       0.000000       0.183275   -9999.000000   -9999.000000       0.052900       0.157000
57033     57033     shaanxi        108.8167       34.5500          102       155     2012      12        28        363              0.000000      -1.745575       0.000000       0.186293   -9999.000000   -9999.000000   -9999.000000   -9999.000000
57033     57033     shaanxi        108.8167       34.5500          102       155     2012      12        29        364              0.000000      -1.419189       0.276415       0.188722   -9999.000000   -9999.000000       0.055300       0.004000
57033     57033     shaanxi        108.8167       34.5500          102       155     2012      12        30        365              0.000000      -3.506683       0.000000       0.176474   -9999.000000   -9999.000000       0.013600   -9999.000000
57033     57033     shaanxi        108.8167       34.5500          102       155     2012      12        31        366              0.030733      -1.772308       0.000000       0.184726   -9999.000000   -9999.000000       0.047600   -9999.000000
