# Supplementary material for: Research on Fusing Multisatellite Soil Moisture Data Based on Bayesian Model Averaging
Source: Hindawi journal article supplement (doi:10.1155/2018/9310838), 2018-06-25
Supplement: f1 [file 9310838.f1.zip › 2012_sm00-10cm_daily_ZDB_ZHY_57035_366days_allin.txt]

57035     57035     shaanxi        108.2333       34.5500          102       153     2012      01        01        001              0.000000   -9999.000000       0.000000   -9999.000000       0.091000   -9999.000000       0.058600   -9999.000000
57035     57035     shaanxi        108.2333       34.5500          102       153     2012      01        02        002              0.148875      -0.285767       0.364795       0.206321       0.100000       0.175600   -9999.000000       0.102000
57035     57035     shaanxi        108.2333       34.5500          102       153     2012      01        03        003              0.000000       0.270325       0.000000       0.217025   -9999.000000   -9999.000000       0.066300   -9999.000000
57035     57035     shaanxi        108.2333       34.5500          102       153     2012      01        04        004              0.118696      -1.695923       0.000000       0.198638   -9999.000000   -9999.000000       0.066600       0.060000
57035     57035     shaanxi        108.2333       34.5500          102       153     2012      01        05        005              0.098792      -3.100922       0.000000       0.180080   -9999.000000       0.063600       0.072400   -9999.000000
57035     57035     shaanxi        108.2333       34.5500          102       153     2012      01        06        006              0.101042      -3.189026       0.000000       0.175299       0.088000   -9999.000000       0.075200       0.042000
57035     57035     shaanxi        108.2333       34.5500          102       153     2012      01        07        007              0.112583      -1.173950       0.000000       0.195507   -9999.000000   -9999.000000   -9999.000000   -9999.000000
57035     57035     shaanxi        108.2333       34.5500          102       153     2012      01        08        008              0.000000      -1.801666       0.000000       0.186875       0.096000   -9999.000000   -9999.000000   -9999.000000
57035     57035     shaanxi        108.2333       34.5500          102       153     2012      01        09        009              0.113125      -0.228516       0.000000       0.208277   -9999.000000   -9999.000000   -9999.000000       0.034000
57035     57035     shaanxi        108.2333       34.5500          102       153     2012      01        10        010              0.112417       0.326569       0.000000       0.214797       0.087000       0.115900       0.049200   -9999.000000
57035     57035     shaanxi        108.2333       34.5500          102       153     2012      01        11        011              0.107208      -0.466614       0.000000       0.207256       0.087000   -9999.000000       0.044700       0.134000
57035     57035     shaanxi        108.2333       34.5500          102       153     2012      01        12        012              0.109375      -0.680450       0.000000       0.203684       0.102000   -9999.000000       0.048600   -9999.000000
57035     57035     shaanxi        108.2333       34.5500          102       153     2012      01        13        013              0.113417      -0.614532       0.000000       0.202591       0.096000   -9999.000000   -9999.000000   -9999.000000
57035     57035     shaanxi        108.2333       34.5500          102       153     2012      01        14        014              0.116000      -0.446747       0.000000       0.206982   -9999.000000   -9999.000000       0.050400       0.015000
57035     57035     shaanxi        108.2333       34.5500          102       153     2012      01        15        015              0.108542      -0.142120       0.000000       0.210674   -9999.000000       0.107000       0.041300   -9999.000000
57035     57035     shaanxi        108.2333       34.5500          102       153     2012      01        16        016              0.105125      -0.309265       0.000000       0.207035   -9999.000000   -9999.000000       0.042000       0.023000
57035     57035     shaanxi        108.2333       34.5500          102       153     2012      01        17        017              0.000000      -0.647552       0.000000       0.203819       0.098000   -9999.000000       0.043200   -9999.000000
57035     57035     shaanxi        108.2333       34.5500          102       153     2012      01        18        018              0.108417       0.617371       0.000000       0.220229   -9999.000000       0.256500       0.043900   -9999.000000
57035     57035     shaanxi        108.2333       34.5500          102       153     2012      01        19        019              0.115375      -0.422333       0.000000       0.208204   -9999.000000   -9999.000000   -9999.000000       0.065000
57035     57035     shaanxi        108.2333       34.5500          102       153     2012      01        20        020              0.124542      -0.789886       0.396207       0.199645   -9999.000000       0.045400       0.040800   -9999.000000
57035     57035     shaanxi        108.2333       34.5500          102       153     2012      01        21        021              0.129917      -0.519318       0.000000       0.206552   -9999.000000   -9999.000000       0.039600       0.138000
57035     57035     shaanxi        108.2333       34.5500          102       153     2012      01        22        022              0.134500      -2.048645       0.000000       0.188668   -9999.000000   -9999.000000       0.035400   -9999.000000
57035     57035     shaanxi        108.2333       34.5500          102       153     2012      01        23        023              0.135750      -4.929932       2.004187       0.162933   -9999.000000       0.014000       0.031700   -9999.000000
57035     57035     shaanxi        108.2333       34.5500          102       153     2012      01        24        024              0.131167      -5.117584       0.311000       0.160121   -9999.000000   -9999.000000   -9999.000000   -9999.000000
57035     57035     shaanxi        108.2333       34.5500          102       153     2012      01        25        025              0.121500      -5.837097       0.659142       0.156955   -9999.000000       0.121200   -9999.000000   -9999.000000
57035     57035     shaanxi        108.2333       34.5500          102       153     2012      01        26        026              0.113208      -3.973907       0.000000       0.170474   -9999.000000   -9999.000000       0.022400       0.018000
57035     57035     shaanxi        108.2333       34.5500          102       153     2012      01        27        027              0.112250      -2.112946       0.466960       0.187371       0.098000   -9999.000000       0.026400   -9999.000000
57035     57035     shaanxi        108.2333       34.5500          102       153     2012      01        28        028              0.147292      -0.641998       0.000000       0.203711       0.102000       0.086300       0.031200       0.239000
57035     57035     shaanxi        108.2333       34.5500          102       153     2012      01        29        029              0.185458       0.591339       0.709065       0.219722   -9999.000000   -9999.000000       0.034700       0.153000
57035     57035     shaanxi        108.2333       34.5500          102       153     2012      01        30        030              0.207250       0.493042       1.688410       0.221224   -9999.000000   -9999.000000   -9999.000000       0.221000
57035     57035     shaanxi        108.2333       34.5500          102       153     2012      01        31        031              0.207000       1.166656       2.366371       0.226155   -9999.000000   -9999.000000       0.040500       0.332000
57035     57035     shaanxi        108.2333       34.5500          102       153     2012      02        01        032              0.197458       2.628174       0.000000       0.243687   -9999.000000   -9999.000000       0.032400   -9999.000000
57035     57035     shaanxi        108.2333       34.5500          102       153     2012      02        02        033              0.178833       0.811859       0.000000       0.228740   -9999.000000       0.176400       0.042400       0.084000
57035     57035     shaanxi        108.2333       34.5500          102       153     2012      02        03        034              0.175000      -0.742279       0.000000       0.205552       0.100000   -9999.000000       0.054700       0.154000
57035     57035     shaanxi        108.2333       34.5500          102       153     2012      02        04        035              0.173391       0.905518       0.000000       0.220706   -9999.000000   -9999.000000       0.052900       0.286000
57035     57035     shaanxi        108.2333       34.5500          102       153     2012      02        05        036              0.173792       0.913269       0.000000       0.222429   -9999.000000       0.023300   -9999.000000       0.146000
57035     57035     shaanxi        108.2333       34.5500          102       153     2012      02        06        037              0.164000       2.252686       0.000000       0.236453   -9999.000000   -9999.000000       0.044400   -9999.000000
57035     57035     shaanxi        108.2333       34.5500          102       153     2012      02        07        038              0.146583       0.361237       0.000000       0.220511   -9999.000000       0.089700       0.047100       0.036000
57035     57035     shaanxi        108.2333       34.5500          102       153     2012      02        08        039              0.136958      -1.363678       0.000000       0.196463       0.095000   -9999.000000       0.045400   -9999.000000
57035     57035     shaanxi        108.2333       34.5500          102       153     2012      02        09        040              0.133417      -1.474915       0.000000       0.195457   -9999.000000   -9999.000000       0.048300       0.081000
57035     57035     shaanxi        108.2333       34.5500          102       153     2012      02        10        041              0.135792      -1.391266       0.000000       0.193755   -9999.000000       0.064800   -9999.000000   -9999.000000
57035     57035     shaanxi        108.2333       34.5500          102       153     2012      02        11        042              0.134833      -0.568207       0.000000       0.204051       0.092000   -9999.000000   -9999.000000   -9999.000000
57035     57035     shaanxi        108.2333       34.5500          102       153     2012      02        12        043              0.140333       0.726257       0.000000       0.214469   -9999.000000   -9999.000000   -9999.000000       0.143000
57035     57035     shaanxi        108.2333       34.5500          102       153     2012      02        13        044              0.139792       1.174225       0.000000       0.224018   -9999.000000   -9999.000000       0.034000   -9999.000000
57035     57035     shaanxi        108.2333       34.5500          102       153     2012      02        14        045              0.140292       1.368042       0.000000       0.227633   -9999.000000   -9999.000000   -9999.000000       0.139000
57035     57035     shaanxi        108.2333       34.5500          102       153     2012      02        15        046              0.140083       3.181427       0.000000       0.243414   -9999.000000   -9999.000000       0.056000   -9999.000000
57035     57035     shaanxi        108.2333       34.5500          102       153     2012      02        16        047              0.137958       1.671082       0.000000       0.239915       0.093000   -9999.000000   -9999.000000   -9999.000000
57035     57035     shaanxi        108.2333       34.5500          102       153     2012      02        17        048              0.134625       1.852722       0.000000       0.231068       0.086000   -9999.000000       0.050400       0.045000
57035     57035     shaanxi        108.2333       34.5500          102       153     2012      02        18        049              0.133458       0.414673       0.000000       0.215666       0.099000   -9999.000000       0.035400   -9999.000000
57035     57035     shaanxi        108.2333       34.5500          102       153     2012      02        19        050              0.133125       1.022095       0.000000       0.219866       0.097000   -9999.000000       0.049800       0.211000
57035     57035     shaanxi        108.2333       34.5500          102       153     2012      02        20        051              0.133292       2.622070       0.000000       0.234249   -9999.000000   -9999.000000       0.047700   -9999.000000
57035     57035     shaanxi        108.2333       34.5500          102       153     2012      02        21        052              0.132875       3.059387       0.000000       0.240684   -9999.000000   -9999.000000   -9999.000000       0.117000
57035     57035     shaanxi        108.2333       34.5500          102       153     2012      02        22        053              0.133083       3.850433       0.000000       0.245230       0.086000   -9999.000000   -9999.000000       0.255000
57035     57035     shaanxi        108.2333       34.5500          102       153     2012      02        23        054              0.131042       4.820465       0.000000       0.256041       0.093500       0.201100       0.046500   -9999.000000
57035     57035     shaanxi        108.2333       34.5500          102       153     2012      02        24        055              0.130833       2.774078       0.000000       0.250335       0.089000   -9999.000000       0.050700       0.160000
57035     57035     shaanxi        108.2333       34.5500          102       153     2012      02        25        056              0.130625       3.069672       0.000000       0.246234   -9999.000000   -9999.000000       0.050300   -9999.000000
57035     57035     shaanxi        108.2333       34.5500          102       153     2012      02        26        057              0.135667       1.163177       0.603974       0.233011   -9999.000000   -9999.000000       0.055700       0.223000
57035     57035     shaanxi        108.2333       34.5500          102       153     2012      02        27        058              0.134250       1.098297       0.000000       0.231803       0.081000   -9999.000000   -9999.000000       0.087000
57035     57035     shaanxi        108.2333       34.5500          102       153     2012      02        28        059              0.147000       1.325623       0.000000       0.231812       0.079000   -9999.000000   -9999.000000       0.354000
57035     57035     shaanxi        108.2333       34.5500          102       153     2012      02        29        060              0.000000   -9999.000000       0.000000   -9999.000000       0.091000   -9999.000000   -9999.000000   -9999.000000
57035     57035     shaanxi        108.2333       34.5500          102       153     2012      03        01        061              0.160500       1.665192       0.256540       0.239271   -9999.000000   -9999.000000       0.046900   -9999.000000
57035     57035     shaanxi        108.2333       34.5500          102       153     2012      03        02        062              0.159417       2.460114       0.000000       0.253383   -9999.000000   -9999.000000       0.046700       0.344000
57035     57035     shaanxi        108.2333       34.5500          102       153     2012      03        03        063              0.157167       2.106323       0.000000       0.253701   -9999.000000   -9999.000000       0.046200       0.246000
57035     57035     shaanxi        108.2333       34.5500          102       153     2012      03        04        064              0.155625       2.015076       0.132904       0.250943   -9999.000000       0.150500   -9999.000000       0.294000
57035     57035     shaanxi        108.2333       34.5500          102       153     2012      03        05        065              0.154375       1.761444       0.000000       0.245646       0.105000   -9999.000000       0.051000       0.093000
57035     57035     shaanxi        108.2333       34.5500          102       153     2012      03        06        066              0.151696       3.686646       2.887896       0.254560       0.106000   -9999.000000       0.038200   -9999.000000
57035     57035     shaanxi        108.2333       34.5500          102       153     2012      03        07        067              0.000000       3.618469       0.273353       0.252704       0.105000   -9999.000000       0.050300       0.099000
57035     57035     shaanxi        108.2333       34.5500          102       153     2012      03        08        068              0.163375       3.916473       0.400744       0.256393   -9999.000000   -9999.000000       0.058400   -9999.000000
57035     57035     shaanxi        108.2333       34.5500          102       153     2012      03        09        069              0.164708       2.649994       0.000000       0.258705       0.109000   -9999.000000       0.055600       0.246000
57035     57035     shaanxi        108.2333       34.5500          102       153     2012      03        10        070              0.162792       3.946838       0.000000       0.259467       0.104000   -9999.000000   -9999.000000       0.142000
57035     57035     shaanxi        108.2333       34.5500          102       153     2012      03        11        071              0.157000       7.858612       0.000000       0.263071       0.089000   -9999.000000       0.048500   -9999.000000
57035     57035     shaanxi        108.2333       34.5500          102       153     2012      03        12        072              0.155083       7.273346       0.000000       0.259126   -9999.000000   -9999.000000       0.049000       0.153000
57035     57035     shaanxi        108.2333       34.5500          102       153     2012      03        13        073              0.156083       6.776123       0.000000       0.258391       0.091000   -9999.000000       0.048400   -9999.000000
57035     57035     shaanxi        108.2333       34.5500          102       153     2012      03        14        074              0.154417      10.120544       0.168893       0.254489       0.087000   -9999.000000   -9999.000000       0.246000
57035     57035     shaanxi        108.2333       34.5500          102       153     2012      03        15        075              0.154042      10.416748       0.000000       0.252388       0.096500   -9999.000000   -9999.000000   -9999.000000
57035     57035     shaanxi        108.2333       34.5500          102       153     2012      03        16        076              0.156958       5.809937       0.000000       0.256450       0.083000   -9999.000000   -9999.000000   -9999.000000
57035     57035     shaanxi        108.2333       34.5500          102       153     2012      03        17        077              0.155708      10.387207       0.000000       0.252931   -9999.000000   -9999.000000       0.042200       0.183000
57035     57035     shaanxi        108.2333       34.5500          102       153     2012      03        18        078              0.152750      12.965576       0.000000       0.247973       0.085000   -9999.000000       0.050200   -9999.000000
57035     57035     shaanxi        108.2333       34.5500          102       153     2012      03        19        079              0.147250      13.468903       0.000000       0.241472       0.081000   -9999.000000       0.055400       0.092000
57035     57035     shaanxi        108.2333       34.5500          102       153     2012      03        20        080              0.146042       7.534515       0.000000       0.243829       0.081500   -9999.000000       0.058100   -9999.000000
57035     57035     shaanxi        108.2333       34.5500          102       153     2012      03        21        081              0.150667       6.745728       0.285051       0.246758       0.119000       0.352700   -9999.000000       0.365000
57035     57035     shaanxi        108.2333       34.5500          102       153     2012      03        22        082              0.156583       4.044495       0.698792       0.251627   -9999.000000   -9999.000000       0.059800       0.172000
57035     57035     shaanxi        108.2333       34.5500          102       153     2012      03        23        083              0.153125       5.459778       0.000000       0.252691   -9999.000000   -9999.000000       0.048300   -9999.000000
57035     57035     shaanxi        108.2333       34.5500          102       153     2012      03        24        084              0.152167       8.379974       0.000000       0.243664       0.095500   -9999.000000       0.050800       0.073000
57035     57035     shaanxi        108.2333       34.5500          102       153     2012      03        25        085              0.000000      11.712097       0.000000       0.236967       0.090000   -9999.000000       0.054200   -9999.000000
57035     57035     shaanxi        108.2333       34.5500          102       153     2012      03        26        086              0.148792      13.483124       0.000000       0.230557       0.094000   -9999.000000       0.071200       0.188000
57035     57035     shaanxi        108.2333       34.5500          102       153     2012      03        27        087              0.146625      14.714996       0.000000       0.225112       0.090000   -9999.000000   -9999.000000       0.047000
57035     57035     shaanxi        108.2333       34.5500          102       153     2012      03        28        088              0.148458      15.147034       0.361860       0.221334       0.123000   -9999.000000       0.090400       0.408000
57035     57035     shaanxi        108.2333       34.5500          102       153     2012      03        29        089              0.156042      10.695831       0.000000       0.231000       0.099000   -9999.000000       0.087100       0.108000
57035     57035     shaanxi        108.2333       34.5500          102       153     2012      03        30        090              0.147625      15.333282       0.713902       0.227143       0.091000   -9999.000000       0.072800   -9999.000000
57035     57035     shaanxi        108.2333       34.5500          102       153     2012      03        31        091              0.147417      11.420044       0.115542       0.221943       0.094500   -9999.000000       0.075300       0.154000
57035     57035     shaanxi        108.2333       34.5500          102       153     2012      04        01        092              0.146542      15.268280       0.000000       0.214618       0.100000   -9999.000000   -9999.000000       0.055000
57035     57035     shaanxi        108.2333       34.5500          102       153     2012      04        02        093              0.140250      16.680115       0.000000       0.211265       0.110000   -9999.000000   -9999.000000       0.196000
57035     57035     shaanxi        108.2333       34.5500          102       153     2012      04        03        094              0.140125      13.153290       0.000000       0.209246       0.113000   -9999.000000       0.060700       0.078000
57035     57035     shaanxi        108.2333       34.5500          102       153     2012      04        04        095              0.140167      14.562500       0.000000       0.204917       0.099000       0.109400       0.071000   -9999.000000
57035     57035     shaanxi        108.2333       34.5500          102       153     2012      04        05        096              0.136333      17.554443       0.000000       0.199372       0.096500   -9999.000000       0.066600       0.081000
57035     57035     shaanxi        108.2333       34.5500          102       153     2012      04        06        097              0.135500      15.881622       0.000000       0.196550       0.102000   -9999.000000       0.067100   -9999.000000
57035     57035     shaanxi        108.2333       34.5500          102       153     2012      04        07        098              0.135167      16.501007       0.000000       0.194927   -9999.000000   -9999.000000   -9999.000000       0.066000
57035     57035     shaanxi        108.2333       34.5500          102       153     2012      04        08        099              0.134875      18.051819       0.000000       0.192353       0.103000   -9999.000000       0.066200   -9999.000000
57035     57035     shaanxi        108.2333       34.5500          102       153     2012      04        09        100              0.130167      19.981262       0.190639       0.189638       0.109500       0.157200       0.096500   -9999.000000
57035     57035     shaanxi        108.2333       34.5500          102       153     2012      04        10        101              0.133750      16.193115       0.000000       0.192990       0.097500   -9999.000000       0.098300       0.091000
57035     57035     shaanxi        108.2333       34.5500          102       153     2012      04        11        102              0.132292      19.526337       4.443598       0.191536       0.115000   -9999.000000       0.094700   -9999.000000
57035     57035     shaanxi        108.2333       34.5500          102       153     2012      04        12        103              0.141833      17.064514       0.163595       0.203700   -9999.000000   -9999.000000       0.096000       0.023000
57035     57035     shaanxi        108.2333       34.5500          102       153     2012      04        13        104              0.143917      12.069794       0.198145       0.243494       0.122000   -9999.000000   -9999.000000   -9999.000000
57035     57035     shaanxi        108.2333       34.5500          102       153     2012      04        14        105              0.139875      16.419434       0.000000       0.223301       0.117500   -9999.000000       0.093000   -9999.000000
57035     57035     shaanxi        108.2333       34.5500          102       153     2012      04        15        106              0.137458      17.354004       0.000000       0.212102       0.105000   -9999.000000       0.095100       0.045000
57035     57035     shaanxi        108.2333       34.5500          102       153     2012      04        16        107              0.134417      19.667053       1.171911       0.201494       0.111000   -9999.000000       0.098200   -9999.000000
57035     57035     shaanxi        108.2333       34.5500          102       153     2012      04        17        108              0.129333      20.199799       0.055235       0.199051       0.127000   -9999.000000       0.105800       0.043000
57035     57035     shaanxi        108.2333       34.5500          102       153     2012      04        18        109              0.129750      17.555054       0.000000       0.201587       0.116000   -9999.000000   -9999.000000   -9999.000000
57035     57035     shaanxi        108.2333       34.5500          102       153     2012      04        19        110              0.123958      20.234039       0.391980       0.194144       0.113000   -9999.000000       0.112900       0.127000
57035     57035     shaanxi        108.2333       34.5500          102       153     2012      04        20        111              0.125042      17.211609       0.948422       0.195757       0.114000   -9999.000000       0.089900       0.010000
57035     57035     shaanxi        108.2333       34.5500          102       153     2012      04        21        112              0.123917      18.836548       0.048438       0.193124       0.141000   -9999.000000       0.108800   -9999.000000
57035     57035     shaanxi        108.2333       34.5500          102       153     2012      04        22        113              0.122000      21.360626       1.508570       0.185963       0.133000       0.166500   -9999.000000       0.013000
57035     57035     shaanxi        108.2333       34.5500          102       153     2012      04        23        114              0.154417      23.743134       0.663965       0.180904   -9999.000000   -9999.000000       0.109400   -9999.000000
57035     57035     shaanxi        108.2333       34.5500          102       153     2012      04        24        115              0.204000      21.184845       0.632227       0.186419       0.164000   -9999.000000   -9999.000000       0.588000
57035     57035     shaanxi        108.2333       34.5500          102       153     2012      04        25        116              0.000000      17.961304       0.268707       0.186823       0.140500   -9999.000000       0.116800       0.071000
57035     57035     shaanxi        108.2333       34.5500          102       153     2012      04        26        117              0.173750      18.984955       0.000000       0.179527       0.130500   -9999.000000       0.108500       0.104000
57035     57035     shaanxi        108.2333       34.5500          102       153     2012      04        27        118              0.170167      22.983215       0.000000       0.175448       0.130000   -9999.000000       0.106600       0.016000
57035     57035     shaanxi        108.2333       34.5500          102       153     2012      04        28        119              0.168375      25.169708       5.494190       0.173502   -9999.000000   -9999.000000       0.109800   -9999.000000
57035     57035     shaanxi        108.2333       34.5500          102       153     2012      04        29        120              0.168458      24.357880       0.000000       0.216221       0.149000   -9999.000000   -9999.000000       0.049000
57035     57035     shaanxi        108.2333       34.5500          102       153     2012      04        30        121              0.164167      23.502625       0.138330       0.223795       0.153000   -9999.000000   -9999.000000       0.284000
57035     57035     shaanxi        108.2333       34.5500          102       153     2012      05        01        122              0.169458      19.542847       0.177184       0.212899       0.183500       0.186000       0.130800       0.391000
57035     57035     shaanxi        108.2333       34.5500          102       153     2012      05        02        123              0.171958      18.022095       2.235696       0.211175       0.180000       0.186900       0.147100       0.543000
57035     57035     shaanxi        108.2333       34.5500          102       153     2012      05        03        124              0.174417      17.885986       2.135527       0.231309       0.196000   -9999.000000       0.132100   -9999.000000
57035     57035     shaanxi        108.2333       34.5500          102       153     2012      05        04        125              0.172000      19.374695       0.000000       0.227975       0.179000   -9999.000000       0.121500       0.102000
57035     57035     shaanxi        108.2333       34.5500          102       153     2012      05        05        126              0.167167      22.024292       0.000000       0.212333       0.160500   -9999.000000   -9999.000000   -9999.000000
57035     57035     shaanxi        108.2333       34.5500          102       153     2012      05        06        127              0.158667      24.990295       0.200856       0.195329       0.154500   -9999.000000       0.135300       0.164000
57035     57035     shaanxi        108.2333       34.5500          102       153     2012      05        07        128              0.154333      23.724884       0.244753       0.188792   -9999.000000       0.300200       0.100600       0.107000
57035     57035     shaanxi        108.2333       34.5500          102       153     2012      05        08        129              0.153667      23.963654       2.010061       0.189890       0.140000   -9999.000000       0.123400   -9999.000000
57035     57035     shaanxi        108.2333       34.5500          102       153     2012      05        09        130              0.145292      26.985046       3.580753       0.180917   -9999.000000       0.212800       0.111600       0.148000
57035     57035     shaanxi        108.2333       34.5500          102       153     2012      05        10        131              0.156667      25.269012      15.278487       0.178027   -9999.000000   -9999.000000       0.111000   -9999.000000
57035     57035     shaanxi        108.2333       34.5500          102       153     2012      05        11        132              0.250792      26.841400       0.389117       0.211051       0.209000   -9999.000000   -9999.000000       0.535000
57035     57035     shaanxi        108.2333       34.5500          102       153     2012      05        12        133              0.216292      20.031799       0.000000       0.288468       0.196500       0.217700       0.126600   -9999.000000
57035     57035     shaanxi        108.2333       34.5500          102       153     2012      05        13        134              0.201500      18.469879       0.682379       0.255315       0.187000   -9999.000000       0.128400   -9999.000000
57035     57035     shaanxi        108.2333       34.5500          102       153     2012      05        14        135              0.192375      17.275360       0.000000       0.248271   -9999.000000       0.154900       0.129500       0.195000
57035     57035     shaanxi        108.2333       34.5500          102       153     2012      05        15        136              0.179375      20.562225       0.000000       0.230909       0.201000       0.128700       0.133500   -9999.000000
57035     57035     shaanxi        108.2333       34.5500          102       153     2012      05        16        137              0.169792      22.041138       0.000000       0.212176       0.170000   -9999.000000   -9999.000000       0.245000
57035     57035     shaanxi        108.2333       34.5500          102       153     2012      05        17        138              0.161208      23.466949       0.000000       0.198063       0.161000   -9999.000000   -9999.000000   -9999.000000
57035     57035     shaanxi        108.2333       34.5500          102       153     2012      05        18        139              0.153792      24.111786       0.000000       0.189586       0.166000   -9999.000000       0.120700       0.222000
57035     57035     shaanxi        108.2333       34.5500          102       153     2012      05        19        140              0.145667      25.837219       0.000000       0.184350   -9999.000000   -9999.000000       0.135300       0.325000
57035     57035     shaanxi        108.2333       34.5500          102       153     2012      05        20        141              0.133583      27.674377       1.702010       0.179955   -9999.000000   -9999.000000       0.124900   -9999.000000
57035     57035     shaanxi        108.2333       34.5500          102       153     2012      05        21        142              0.202792      24.607178      18.373329       0.183276       0.290500   -9999.000000       0.180400       0.727000
57035     57035     shaanxi        108.2333       34.5500          102       153     2012      05        22        143              0.203708      17.647278       0.000000       0.314709       0.241500   -9999.000000   -9999.000000   -9999.000000
57035     57035     shaanxi        108.2333       34.5500          102       153     2012      05        23        144              0.187833      18.917816       3.972876       0.287392   -9999.000000   -9999.000000       0.168800       0.705000
57035     57035     shaanxi        108.2333       34.5500          102       153     2012      05        24        145              0.178583      18.239227       1.822456       0.271329   -9999.000000   -9999.000000       0.138100       0.428000
57035     57035     shaanxi        108.2333       34.5500          102       153     2012      05        25        146              0.000000      17.355927       0.921637       0.263035       0.240000   -9999.000000       0.152700       0.489000
57035     57035     shaanxi        108.2333       34.5500          102       153     2012      05        26        147              0.161708      20.782166       0.208544       0.249107       0.210000   -9999.000000       0.138500       0.420000
57035     57035     shaanxi        108.2333       34.5500          102       153     2012      05        27        148              0.149458      24.179352       0.000000       0.231848       0.186000   -9999.000000       0.135700   -9999.000000
57035     57035     shaanxi        108.2333       34.5500          102       153     2012      05        28        149              0.172208      25.865051      17.398960       0.216376   -9999.000000   -9999.000000   -9999.000000       0.787000
57035     57035     shaanxi        108.2333       34.5500          102       153     2012      05        29        150              0.180750      19.140778      10.121147       0.293845       0.216000   -9999.000000       0.151200       0.425000
57035     57035     shaanxi        108.2333       34.5500          102       153     2012      05        30        151              0.159417      22.172821       0.000000       0.285096       0.219000       0.195900       0.149000   -9999.000000
57035     57035     shaanxi        108.2333       34.5500          102       153     2012      05        31        152              0.144833      23.910034       0.000000       0.260463       0.210000   -9999.000000       0.140800   -9999.000000
57035     57035     shaanxi        108.2333       34.5500          102       153     2012      06        01        153              0.130625      21.740265       0.000000       0.252309       0.161000   -9999.000000       0.138600   -9999.000000
57035     57035     shaanxi        108.2333       34.5500          102       153     2012      06        02        154              0.115667      24.515961       0.000000       0.235268       0.161500   -9999.000000   -9999.000000       0.405000
57035     57035     shaanxi        108.2333       34.5500          102       153     2012      06        03        155              0.106875      25.142426       0.000000       0.222501       0.164000   -9999.000000   -9999.000000   -9999.000000
57035     57035     shaanxi        108.2333       34.5500          102       153     2012      06        04        156              0.101458      23.704193       0.000000       0.217511   -9999.000000   -9999.000000       0.132900       0.489000
57035     57035     shaanxi        108.2333       34.5500          102       153     2012      06        05        157              0.099167      25.742920       2.033022       0.208637       0.187000   -9999.000000       0.166400       0.520000
57035     57035     shaanxi        108.2333       34.5500          102       153     2012      06        06        158              0.098458      21.712250       0.000000       0.231709       0.151500   -9999.000000       0.146900   -9999.000000
57035     57035     shaanxi        108.2333       34.5500          102       153     2012      06        07        159              0.094583      24.242188       0.000000       0.221611       0.154500   -9999.000000       0.145400       0.331000
57035     57035     shaanxi        108.2333       34.5500          102       153     2012      06        08        160              0.090083      26.836792       0.213580       0.202646       0.177000   -9999.000000   -9999.000000   -9999.000000
57035     57035     shaanxi        108.2333       34.5500          102       153     2012      06        09        161              0.088125      25.830322       0.000000       0.194574   -9999.000000   -9999.000000       0.154200       0.499000
57035     57035     shaanxi        108.2333       34.5500          102       153     2012      06        10        162              0.084292      29.168976       1.766161       0.184851       0.162000   -9999.000000       0.135200   -9999.000000
57035     57035     shaanxi        108.2333       34.5500          102       153     2012      06        11        163              0.000000      29.085114       0.000000       0.189590       0.171000   -9999.000000       0.132100   -9999.000000
57035     57035     shaanxi        108.2333       34.5500          102       153     2012      06        12        164              0.078042      27.751099       0.000000       0.185108       0.157000   -9999.000000       0.129000       0.298000
57035     57035     shaanxi        108.2333       34.5500          102       153     2012      06        13        165              0.076292      29.983856       0.000000       0.177183       0.174000   -9999.000000       0.128100   -9999.000000
57035     57035     shaanxi        108.2333       34.5500          102       153     2012      06        14        166              0.071833      31.596466       0.000000       0.173723       0.166000   -9999.000000   -9999.000000       0.288000
57035     57035     shaanxi        108.2333       34.5500          102       153     2012      06        15        167              0.070083      27.607971       0.000000       0.172107       0.161000   -9999.000000       0.127000   -9999.000000
57035     57035     shaanxi        108.2333       34.5500          102       153     2012      06        16        168              0.069042      28.568207       0.000000       0.171202       0.178000   -9999.000000       0.135100       0.294000
57035     57035     shaanxi        108.2333       34.5500          102       153     2012      06        17        169              0.068583      29.747101       0.000000       0.170063       0.165000       0.092900       0.128400       0.305000
57035     57035     shaanxi        108.2333       34.5500          102       153     2012      06        18        170              0.067125      30.643372       1.557892       0.169698       0.177000   -9999.000000       0.106900   -9999.000000
57035     57035     shaanxi        108.2333       34.5500          102       153     2012      06        19        171              0.065583      29.048798       1.111886       0.182365       0.168000   -9999.000000   -9999.000000       0.340000
57035     57035     shaanxi        108.2333       34.5500          102       153     2012      06        20        172              0.066083      26.854584       0.000000       0.183899       0.195000       0.260500   -9999.000000   -9999.000000
57035     57035     shaanxi        108.2333       34.5500          102       153     2012      06        21        173              0.100458      30.169342       0.532368       0.173193       0.195000   -9999.000000       0.101200       0.315000
57035     57035     shaanxi        108.2333       34.5500          102       153     2012      06        22        174              0.104167      31.933563       0.000000       0.170166       0.152500   -9999.000000       0.115400       0.350000
57035     57035     shaanxi        108.2333       34.5500          102       153     2012      06        23        175              0.103458      31.967285       0.832181       0.168424       0.125000   -9999.000000       0.112900       0.361000
57035     57035     shaanxi        108.2333       34.5500          102       153     2012      06        24        176              0.102458      32.131744       0.406556       0.170231       0.174000   -9999.000000       0.118200       0.323000
57035     57035     shaanxi        108.2333       34.5500          102       153     2012      06        25        177              0.108000      29.630707       4.922831       0.173901   -9999.000000       0.117900   -9999.000000   -9999.000000
57035     57035     shaanxi        108.2333       34.5500          102       153     2012      06        26        178              0.114625      25.347900       0.158818       0.229527       0.198000   -9999.000000       0.106700       0.496000
57035     57035     shaanxi        108.2333       34.5500          102       153     2012      06        27        179              0.115958      25.018921       4.125056       0.213451       0.178000   -9999.000000       0.097200       0.374000
57035     57035     shaanxi        108.2333       34.5500          102       153     2012      06        28        180              0.113625      26.167206       2.515630       0.196895       0.185500   -9999.000000       0.124400       0.356000
57035     57035     shaanxi        108.2333       34.5500          102       153     2012      06        29        181              0.196458      24.883392      17.964277       0.203086       0.220000   -9999.000000       0.138500   -9999.000000
57035     57035     shaanxi        108.2333       34.5500          102       153     2012      06        30        182              0.190208      23.385742       0.000000       0.315596       0.216000   -9999.000000       0.123300   -9999.000000
57035     57035     shaanxi        108.2333       34.5500          102       153     2012      07        01        183              0.158708      26.776489       0.515638       0.266233   -9999.000000   -9999.000000   -9999.000000       0.452000
57035     57035     shaanxi        108.2333       34.5500          102       153     2012      07        02        184              0.188583      28.487793      12.982413       0.241650       0.217000   -9999.000000       0.108600   -9999.000000
57035     57035     shaanxi        108.2333       34.5500          102       153     2012      07        03        185              0.176458      23.093964       4.095854       0.311772       0.176000   -9999.000000       0.101800       0.671000
57035     57035     shaanxi        108.2333       34.5500          102       153     2012      07        04        186              0.162333      27.276093       2.680788       0.288123       0.203000   -9999.000000       0.121600   -9999.000000
57035     57035     shaanxi        108.2333       34.5500          102       153     2012      07        05        187              0.143000      24.807617       0.000000       0.291333       0.185000       0.260300       0.111900   -9999.000000
57035     57035     shaanxi        108.2333       34.5500          102       153     2012      07        06        188              0.131000      27.949371       1.328860       0.261058   -9999.000000   -9999.000000   -9999.000000       0.477000
57035     57035     shaanxi        108.2333       34.5500          102       153     2012      07        07        189              0.126792      28.081207       2.271002       0.246166   -9999.000000   -9999.000000   -9999.000000   -9999.000000
57035     57035     shaanxi        108.2333       34.5500          102       153     2012      07        08        190              0.231208      26.622925      26.872366       0.248115       0.225500   -9999.000000       0.095500       0.951000
57035     57035     shaanxi        108.2333       34.5500          102       153     2012      07        09        191              0.275542      23.819061      11.688347       0.344325       0.221500   -9999.000000       0.105300   -9999.000000
57035     57035     shaanxi        108.2333       34.5500          102       153     2012      07        10        192              0.232708      23.255707       0.446765       0.344927       0.187000   -9999.000000       0.104400   -9999.000000
57035     57035     shaanxi        108.2333       34.5500          102       153     2012      07        11        193              0.195583      28.576477       0.345315       0.308183   -9999.000000   -9999.000000       0.093900       0.642000
57035     57035     shaanxi        108.2333       34.5500          102       153     2012      07        12        194              0.162250      28.035919       0.660251       0.292742       0.190000   -9999.000000   -9999.000000   -9999.000000
57035     57035     shaanxi        108.2333       34.5500          102       153     2012      07        13        195              0.140917      29.007904       4.944490       0.277808       0.205000       0.152800       0.093800       0.618000
57035     57035     shaanxi        108.2333       34.5500          102       153     2012      07        14        196              0.132458      26.758057       0.262375       0.291609       0.185000   -9999.000000       0.087900   -9999.000000
57035     57035     shaanxi        108.2333       34.5500          102       153     2012      07        15        197              0.128333      26.882111       1.165873       0.277857       0.190000   -9999.000000       0.088400       0.538000
57035     57035     shaanxi        108.2333       34.5500          102       153     2012      07        16        198              0.124792      27.401581       4.661079       0.267093       0.200000   -9999.000000       0.099500       0.506000
57035     57035     shaanxi        108.2333       34.5500          102       153     2012      07        17        199              0.121542      27.332214       0.334675       0.257281       0.192000   -9999.000000   -9999.000000   -9999.000000
57035     57035     shaanxi        108.2333       34.5500          102       153     2012      07        18        200              0.119833      26.974670       0.000000       0.249150       0.196000       0.220400   -9999.000000       0.455000
57035     57035     shaanxi        108.2333       34.5500          102       153     2012      07        19        201              0.118542      27.707550       0.000000       0.239473       0.183500   -9999.000000       0.087200   -9999.000000
57035     57035     shaanxi        108.2333       34.5500          102       153     2012      07        20        202              0.118043      27.950958       0.000000       0.232698       0.206000   -9999.000000       0.093000       0.536000
57035     57035     shaanxi        108.2333       34.5500          102       153     2012      07        21        203              0.142783      28.339386      12.265129       0.228122   -9999.000000   -9999.000000       0.098500       0.902000
57035     57035     shaanxi        108.2333       34.5500          102       153     2012      07        22        204              0.152042      24.307037       0.306109       0.301192       0.238000   -9999.000000       0.100200       0.842000
57035     57035     shaanxi        108.2333       34.5500          102       153     2012      07        23        205              0.133000      27.289764       2.908290       0.274144       0.238000   -9999.000000   -9999.000000       0.826000
57035     57035     shaanxi        108.2333       34.5500          102       153     2012      07        24        206              0.130042      24.399445       1.558638       0.277939       0.206500   -9999.000000       0.084800   -9999.000000
57035     57035     shaanxi        108.2333       34.5500          102       153     2012      07        25        207              0.126125      26.532379       0.645199       0.271362       0.198500   -9999.000000       0.065500       0.523000
57035     57035     shaanxi        108.2333       34.5500          102       153     2012      07        26        208              0.122917      28.740173       0.000000       0.255860       0.213000       0.210400       0.078300       0.544000
57035     57035     shaanxi        108.2333       34.5500          102       153     2012      07        27        209              0.120292      30.545929       0.000000       0.238461   -9999.000000   -9999.000000       0.071100       0.582000
57035     57035     shaanxi        108.2333       34.5500          102       153     2012      07        28        210              0.118333      31.410645       2.433215       0.223752       0.196000       0.141800       0.069700       0.529000
57035     57035     shaanxi        108.2333       34.5500          102       153     2012      07        29        211              0.117417      32.484192       0.000000       0.212095       0.179000   -9999.000000   -9999.000000   -9999.000000
57035     57035     shaanxi        108.2333       34.5500          102       153     2012      07        30        212              0.116833      33.808594       6.207392       0.202775       0.188500       0.185300       0.055200       0.802000
57035     57035     shaanxi        108.2333       34.5500          102       153     2012      07        31        213              0.117375      28.380646       0.000000       0.253188       0.176000       0.201400       0.055600   -9999.000000
57035     57035     shaanxi        108.2333       34.5500          102       153     2012      08        01        214              0.115042      26.216522       0.542488       0.247474       0.197000   -9999.000000       0.050300       0.578000
57035     57035     shaanxi        108.2333       34.5500          102       153     2012      08        02        215              0.115083      25.894653       1.124729       0.235749       0.219000   -9999.000000       0.053000   -9999.000000
57035     57035     shaanxi        108.2333       34.5500          102       153     2012      08        03        216              0.114500      28.394897       2.506102       0.225459       0.212000   -9999.000000   -9999.000000   -9999.000000
57035     57035     shaanxi        108.2333       34.5500          102       153     2012      08        04        217              0.113458      29.145111       0.000000       0.214583       0.184000   -9999.000000   -9999.000000       0.519000
57035     57035     shaanxi        108.2333       34.5500          102       153     2012      08        05        218              0.122917      28.927612       4.446764       0.205843       0.197000       0.176800       0.051600   -9999.000000
57035     57035     shaanxi        108.2333       34.5500          102       153     2012      08        06        219              0.132875      27.450806       0.374059       0.239435       0.214000   -9999.000000       0.051500       0.592000
57035     57035     shaanxi        108.2333       34.5500          102       153     2012      08        07        220              0.125000      27.965912       0.842553       0.236042   -9999.000000   -9999.000000       0.043500   -9999.000000
57035     57035     shaanxi        108.2333       34.5500          102       153     2012      08        08        221              0.120500      29.525330       7.434103       0.217122       0.200000   -9999.000000       0.051400   -9999.000000
57035     57035     shaanxi        108.2333       34.5500          102       153     2012      08        09        222              0.118125      28.065308       0.729644       0.265700       0.197500   -9999.000000   -9999.000000       0.657000
57035     57035     shaanxi        108.2333       34.5500          102       153     2012      08        10        223              0.115625      28.291351       0.000000       0.253014       0.197500   -9999.000000   -9999.000000   -9999.000000
57035     57035     shaanxi        108.2333       34.5500          102       153     2012      08        11        224              0.114292      27.480347       0.686476       0.235044       0.207000   -9999.000000       0.044700       0.557000
57035     57035     shaanxi        108.2333       34.5500          102       153     2012      08        12        225              0.115500      29.457153      17.017822       0.218665       0.210000   -9999.000000       0.062300   -9999.000000
57035     57035     shaanxi        108.2333       34.5500          102       153     2012      08        13        226              0.144500      29.020782      15.995328       0.251630       0.277000       0.149900       0.087600       1.000000
57035     57035     shaanxi        108.2333       34.5500          102       153     2012      08        14        227              0.184000      23.469543       1.487557       0.333940       0.268000   -9999.000000       0.077400       0.971000
57035     57035     shaanxi        108.2333       34.5500          102       153     2012      08        15        228              0.178750      23.439301       0.000000       0.315407       0.218000   -9999.000000   -9999.000000   -9999.000000
57035     57035     shaanxi        108.2333       34.5500          102       153     2012      08        16        229              0.152375      25.693573       0.000000       0.293993       0.237000   -9999.000000       0.068400       0.797000
57035     57035     shaanxi        108.2333       34.5500          102       153     2012      08        17        230              0.152042      27.036255      18.219122       0.278942       0.250000   -9999.000000       0.080800   -9999.000000
57035     57035     shaanxi        108.2333       34.5500          102       153     2012      08        18        231              0.229542      25.500702       1.996941       0.307079   -9999.000000   -9999.000000       0.077600       1.000000
57035     57035     shaanxi        108.2333       34.5500          102       153     2012      08        19        232              0.246375      21.794281      15.275311       0.329429       0.261000   -9999.000000       0.083800       0.960000
57035     57035     shaanxi        108.2333       34.5500          102       153     2012      08        20        233              0.235083      21.201141       0.044179       0.349802       0.269000       0.174100   -9999.000000       0.991000
57035     57035     shaanxi        108.2333       34.5500          102       153     2012      08        21        234              0.211250      22.004517       0.000000       0.325149       0.204500   -9999.000000   -9999.000000       1.000000
57035     57035     shaanxi        108.2333       34.5500          102       153     2012      08        22        235              0.183333      23.162109       0.000000       0.310498       0.206000       0.261800       0.071700   -9999.000000
57035     57035     shaanxi        108.2333       34.5500          102       153     2012      08        23        236              0.157958      23.665985       0.000000       0.297362   -9999.000000   -9999.000000       0.085100       0.599000
57035     57035     shaanxi        108.2333       34.5500          102       153     2012      08        24        237              0.140375      23.749390       0.000000       0.287806   -9999.000000   -9999.000000       0.071600   -9999.000000
57035     57035     shaanxi        108.2333       34.5500          102       153     2012      08        25        238              0.000000      24.285889       4.199167       0.279276       0.179000       0.220300       0.072700   -9999.000000
57035     57035     shaanxi        108.2333       34.5500          102       153     2012      08        26        239              0.130250      25.073395       0.000000       0.285708       0.197500   -9999.000000   -9999.000000       0.597000
57035     57035     shaanxi        108.2333       34.5500          102       153     2012      08        27        240              0.129208      24.740906       6.908926       0.288835       0.209000       0.231900       0.092200   -9999.000000
57035     57035     shaanxi        108.2333       34.5500          102       153     2012      08        28        241              0.130333      24.221954       0.000000       0.303161       0.178000   -9999.000000       0.078900       0.739000
57035     57035     shaanxi        108.2333       34.5500          102       153     2012      08        29        242              0.124583      25.550385       0.000000       0.295129       0.213000   -9999.000000       0.085500   -9999.000000
57035     57035     shaanxi        108.2333       34.5500          102       153     2012      08        30        243              0.131458      26.631622      18.372704       0.278438   -9999.000000       0.045900       0.083000       0.678000
57035     57035     shaanxi        108.2333       34.5500          102       153     2012      08        31        244              0.267917      26.001282      31.785053       0.299079       0.307000       0.222600       0.098900       1.000000
57035     57035     shaanxi        108.2333       34.5500          102       153     2012      09        01        245              0.281083      21.146790      20.755165       0.375081       0.232500   -9999.000000   -9999.000000   -9999.000000
57035     57035     shaanxi        108.2333       34.5500          102       153     2012      09        02        246              0.252042      18.838226       0.068566       0.374269       0.190000       0.121000       0.096100       0.906000
57035     57035     shaanxi        108.2333       34.5500          102       153     2012      09        03        247              0.220917      21.510864       0.000000       0.343657   -9999.000000   -9999.000000       0.081900   -9999.000000
57035     57035     shaanxi        108.2333       34.5500          102       153     2012      09        04        248              0.192833      22.941864       0.000000       0.331661       0.210000       0.231200       0.065800       0.641000
57035     57035     shaanxi        108.2333       34.5500          102       153     2012      09        05        249              0.171667      23.413818       0.000000       0.323473       0.189000   -9999.000000       0.068000   -9999.000000
57035     57035     shaanxi        108.2333       34.5500          102       153     2012      09        06        250              0.153958      24.756104       0.000000       0.317128       0.194000   -9999.000000   -9999.000000   -9999.000000
57035     57035     shaanxi        108.2333       34.5500          102       153     2012      09        07        251              0.221208      24.125366      35.804306       0.312522       0.220000       0.114800   -9999.000000       1.000000
57035     57035     shaanxi        108.2333       34.5500          102       153     2012      09        08        252              0.283042      21.859100       4.797478       0.358012       0.263000   -9999.000000       0.081100   -9999.000000
57035     57035     shaanxi        108.2333       34.5500          102       153     2012      09        09        253              0.260792      21.177002       1.455386       0.361313       0.224000       0.110400       0.079400       0.934000
57035     57035     shaanxi        108.2333       34.5500          102       153     2012      09        10        254              0.283417      21.971008      26.973560       0.345033       0.260000   -9999.000000       0.102900   -9999.000000
57035     57035     shaanxi        108.2333       34.5500          102       153     2012      09        11        255              0.265667      19.098755       0.000000       0.378788       0.196500   -9999.000000       0.095900       1.000000
57035     57035     shaanxi        108.2333       34.5500          102       153     2012      09        12        256              0.238917      21.120758       0.000000       0.351258       0.200000   -9999.000000   -9999.000000       0.836000
57035     57035     shaanxi        108.2333       34.5500          102       153     2012      09        13        257              0.208167      17.448242       0.000000       0.342728       0.179000       0.069400       0.081700   -9999.000000
57035     57035     shaanxi        108.2333       34.5500          102       153     2012      09        14        258              0.183583      18.101807       0.000000       0.336088   -9999.000000   -9999.000000       0.073900       0.541000
57035     57035     shaanxi        108.2333       34.5500          102       153     2012      09        15        259              0.185167      19.055634       6.588645       0.330864       0.233000   -9999.000000       0.097400   -9999.000000
57035     57035     shaanxi        108.2333       34.5500          102       153     2012      09        16        260              0.196000      18.349609       0.954964       0.342681       0.229000   -9999.000000       0.094100       1.000000
57035     57035     shaanxi        108.2333       34.5500          102       153     2012      09        17        261              0.182042      16.759918       0.000000       0.340528       0.192000   -9999.000000   -9999.000000       0.714000
57035     57035     shaanxi        108.2333       34.5500          102       153     2012      09        18        262              0.163542      19.645721       0.000000       0.332616       0.185000       0.136300   -9999.000000       0.856000
57035     57035     shaanxi        108.2333       34.5500          102       153     2012      09        19        263              0.148250      20.862946       0.000000       0.327021   -9999.000000   -9999.000000       0.064800       0.620000
57035     57035     shaanxi        108.2333       34.5500          102       153     2012      09        20        264              0.143083      21.456421       1.123513       0.322121       0.228000   -9999.000000       0.080200   -9999.000000
57035     57035     shaanxi        108.2333       34.5500          102       153     2012      09        21        265              0.142250      19.237915       0.403249       0.325809   -9999.000000   -9999.000000       0.066100       0.698000
57035     57035     shaanxi        108.2333       34.5500          102       153     2012      09        22        266              0.139250      20.466858       0.000000       0.323911       0.161000       0.097300       0.069400       0.576000
57035     57035     shaanxi        108.2333       34.5500          102       153     2012      09        23        267              0.136833      20.524170       0.090665       0.321018       0.168000       0.212300   -9999.000000       0.634000
57035     57035     shaanxi        108.2333       34.5500          102       153     2012      09        24        268              0.133875      20.944305       2.906935       0.319431       0.170000   -9999.000000       0.077800       0.564000
57035     57035     shaanxi        108.2333       34.5500          102       153     2012      09        25        269              0.190375      21.088562      11.160119       0.320544       0.204000       0.154900       0.059000   -9999.000000
57035     57035     shaanxi        108.2333       34.5500          102       153     2012      09        26        270              0.190458      17.297455       0.000000       0.351440       0.189000   -9999.000000       0.072100       0.818000
57035     57035     shaanxi        108.2333       34.5500          102       153     2012      09        27        271              0.175500      18.618256       0.000000       0.333821       0.168000   -9999.000000       0.059700   -9999.000000
57035     57035     shaanxi        108.2333       34.5500          102       153     2012      09        28        272              0.143467      18.352020       0.000000       0.325332       0.164500   -9999.000000       0.058200       0.572000
57035     57035     shaanxi        108.2333       34.5500          102       153     2012      09        29        273              0.135667      16.305054       1.495200       0.319634       0.163000   -9999.000000   -9999.000000       0.457000
57035     57035     shaanxi        108.2333       34.5500          102       153     2012      09        30        274              0.129333      17.325439       0.000000       0.317385   -9999.000000   -9999.000000       0.057800   -9999.000000
57035     57035     shaanxi        108.2333       34.5500          102       153     2012      10        01        275              0.125333      17.945221       0.000000       0.313739       0.160000       0.302800       0.066800       0.535000
57035     57035     shaanxi        108.2333       34.5500          102       153     2012      10        02        276              0.126958      18.667694       6.124381       0.310479       0.179000   -9999.000000       0.067400   -9999.000000
57035     57035     shaanxi        108.2333       34.5500          102       153     2012      10        03        277              0.131250      16.394226       0.412551       0.328529       0.158500       0.227500       0.066000       0.596000
57035     57035     shaanxi        108.2333       34.5500          102       153     2012      10        04        278              0.127333      19.410736       2.680506       0.320609       0.188000   -9999.000000   -9999.000000   -9999.000000
57035     57035     shaanxi        108.2333       34.5500          102       153     2012      10        05        279              0.125208      17.041290       0.000000       0.316529       0.166000   -9999.000000   -9999.000000   -9999.000000
57035     57035     shaanxi        108.2333       34.5500          102       153     2012      10        06        280              0.122667      18.131256       0.000000       0.313056       0.163000       0.111600       0.054500       0.560000
57035     57035     shaanxi        108.2333       34.5500          102       153     2012      10        07        281              0.121625      16.359283       0.000000       0.312065       0.172000   -9999.000000       0.066500   -9999.000000
57035     57035     shaanxi        108.2333       34.5500          102       153     2012      10        08        282              0.121458      15.905670       2.546003       0.312219       0.187000   -9999.000000       0.075500       0.806000
57035     57035     shaanxi        108.2333       34.5500          102       153     2012      10        09        283              0.120708      15.136322       0.000000       0.320817       0.167000   -9999.000000       0.065900   -9999.000000
57035     57035     shaanxi        108.2333       34.5500          102       153     2012      10        10        284              0.118583      16.552277       0.000000       0.312271       0.157000   -9999.000000   -9999.000000       0.572000
57035     57035     shaanxi        108.2333       34.5500          102       153     2012      10        11        285              0.117458      16.834229       0.397137       0.308195   -9999.000000       0.060600       0.071100       0.571000
57035     57035     shaanxi        108.2333       34.5500          102       153     2012      10        12        286              0.117625      15.972717       0.000000       0.308620       0.135000   -9999.000000       0.052300   -9999.000000
57035     57035     shaanxi        108.2333       34.5500          102       153     2012      10        13        287              0.116958      16.877289       0.000000       0.307829       0.120500   -9999.000000       0.065300       0.545000
57035     57035     shaanxi        108.2333       34.5500          102       153     2012      10        14        288              0.115417      17.985077       0.000000       0.303516       0.117500   -9999.000000       0.061700   -9999.000000
57035     57035     shaanxi        108.2333       34.5500          102       153     2012      10        15        289              0.113792      16.493500       1.149488       0.302643       0.133000       0.172100       0.072700       0.451000
57035     57035     shaanxi        108.2333       34.5500          102       153     2012      10        16        290              0.111125      14.662323       0.000000       0.305727       0.130000       0.223300   -9999.000000       0.502000
57035     57035     shaanxi        108.2333       34.5500          102       153     2012      10        17        291              0.108708      12.786163       0.151857       0.302222       0.132000   -9999.000000       0.070600       0.577000
57035     57035     shaanxi        108.2333       34.5500          102       153     2012      10        18        292              0.107708      12.771301       1.211532       0.297931       0.145000   -9999.000000       0.080000       0.475000
57035     57035     shaanxi        108.2333       34.5500          102       153     2012      10        19        293              0.109083      11.330444       0.000000       0.300218       0.127500   -9999.000000       0.068000   -9999.000000
57035     57035     shaanxi        108.2333       34.5500          102       153     2012      10        20        294              0.109667      14.379211       0.000000       0.298587       0.137000   -9999.000000       0.072200       0.423000
57035     57035     shaanxi        108.2333       34.5500          102       153     2012      10        21        295              0.107750      15.912872       0.370583       0.296408       0.164000       0.052800   -9999.000000       0.508000
57035     57035     shaanxi        108.2333       34.5500          102       153     2012      10        22        296              0.106875      10.598877       0.000000       0.299099   -9999.000000   -9999.000000   -9999.000000       0.592000
57035     57035     shaanxi        108.2333       34.5500          102       153     2012      10        23        297              0.106125      11.883667       1.109012       0.294852   -9999.000000   -9999.000000       0.076100       0.617000
57035     57035     shaanxi        108.2333       34.5500          102       153     2012      10        24        298              0.108583       9.458160       0.000000       0.301716   -9999.000000       0.233500       0.088500   -9999.000000
57035     57035     shaanxi        108.2333       34.5500          102       153     2012      10        25        299              0.000000      12.507446       0.000000       0.297058       0.145000   -9999.000000       0.076800       0.372000
57035     57035     shaanxi        108.2333       34.5500          102       153     2012      10        26        300              0.109042      13.445221       0.000000       0.294365       0.151000       0.149100       0.079600   -9999.000000
57035     57035     shaanxi        108.2333       34.5500          102       153     2012      10        27        301              0.107375      14.676331       0.000000       0.292104   -9999.000000   -9999.000000   -9999.000000       0.537000
57035     57035     shaanxi        108.2333       34.5500          102       153     2012      10        28        302              0.000000      14.087189       0.309770       0.290490       0.164000   -9999.000000       0.084900   -9999.000000
57035     57035     shaanxi        108.2333       34.5500          102       153     2012      10        29        303              0.107417      13.297119       0.209981       0.291352       0.154000       0.143800       0.078400   -9999.000000
57035     57035     shaanxi        108.2333       34.5500          102       153     2012      10        30        304              0.104792      12.868164       0.000000       0.291914       0.134000   -9999.000000       0.096400       0.432000
57035     57035     shaanxi        108.2333       34.5500          102       153     2012      10        31        305              0.103375      11.186157       0.000000       0.288140       0.151000       0.061400       0.095300   -9999.000000
57035     57035     shaanxi        108.2333       34.5500          102       153     2012      11        01        306              0.102167      10.925110       0.000000       0.285909       0.125000   -9999.000000       0.092300       0.442000
57035     57035     shaanxi        108.2333       34.5500          102       153     2012      11        02        307              0.102292      10.783997       0.000000       0.285401   -9999.000000   -9999.000000   -9999.000000   -9999.000000
57035     57035     shaanxi        108.2333       34.5500          102       153     2012      11        03        308              0.099000      11.569153       0.000000       0.283709   -9999.000000   -9999.000000       0.088100   -9999.000000
57035     57035     shaanxi        108.2333       34.5500          102       153     2012      11        04        309              0.096792       6.377777       0.000000       0.278972       0.122000   -9999.000000       0.097000       0.339000
57035     57035     shaanxi        108.2333       34.5500          102       153     2012      11        05        310              0.095708       6.122955       0.000000       0.278877       0.128000   -9999.000000       0.097300   -9999.000000
57035     57035     shaanxi        108.2333       34.5500          102       153     2012      11        06        311              0.096750       6.256256       2.458185       0.279293       0.137000   -9999.000000       0.107900       0.440000
57035     57035     shaanxi        108.2333       34.5500          102       153     2012      11        07        312              0.101958       8.118744      14.084949       0.280176   -9999.000000   -9999.000000   -9999.000000   -9999.000000
57035     57035     shaanxi        108.2333       34.5500          102       153     2012      11        08        313              0.105583       6.354126       0.000000       0.283187       0.140000       0.065800   -9999.000000       0.475000
57035     57035     shaanxi        108.2333       34.5500          102       153     2012      11        09        314              0.108625       8.288055       1.976995       0.282382       0.152000   -9999.000000       0.100800       0.614000
57035     57035     shaanxi        108.2333       34.5500          102       153     2012      11        10        315              0.109333       7.043304       0.453405       0.284907       0.123000   -9999.000000       0.114800   -9999.000000
57035     57035     shaanxi        108.2333       34.5500          102       153     2012      11        11        316              0.108333       4.912323       1.022716       0.278697       0.136000   -9999.000000       0.103100       0.343000
57035     57035     shaanxi        108.2333       34.5500          102       153     2012      11        12        317              0.109792       5.436340       0.000000       0.280135       0.132000   -9999.000000       0.101300   -9999.000000
57035     57035     shaanxi        108.2333       34.5500          102       153     2012      11        13        318              0.000000       7.284485       0.000000       0.280679   -9999.000000       0.224400   -9999.000000       0.360000
57035     57035     shaanxi        108.2333       34.5500          102       153     2012      11        14        319              0.109458       7.025513       0.000000       0.279424       0.133500   -9999.000000       0.101500       0.385000
57035     57035     shaanxi        108.2333       34.5500          102       153     2012      11        15        320              0.110000       5.992310       0.622053       0.280086   -9999.000000   -9999.000000       0.094900       0.403000
57035     57035     shaanxi        108.2333       34.5500          102       153     2012      11        16        321              0.111542       4.397614       0.000000       0.282587       0.132000       0.117800       0.103600       0.310000
57035     57035     shaanxi        108.2333       34.5500          102       153     2012      11        17        322              0.000000       6.373810       0.000000       0.281014       0.125000   -9999.000000       0.101300   -9999.000000
57035     57035     shaanxi        108.2333       34.5500          102       153     2012      11        18        323              0.112583       7.090302       0.000000       0.280061   -9999.000000   -9999.000000   -9999.000000       0.297000
57035     57035     shaanxi        108.2333       34.5500          102       153     2012      11        19        324              0.112375       7.429535       0.000000       0.278813       0.144000   -9999.000000   -9999.000000       0.331000
57035     57035     shaanxi        108.2333       34.5500          102       153     2012      11        20        325              0.111833       6.759583       0.000000       0.278964       0.131000   -9999.000000       0.089700       0.394000
57035     57035     shaanxi        108.2333       34.5500          102       153     2012      11        21        326              0.111625       5.610504       0.000000       0.280655       0.119500       0.154900       0.102000       0.281000
57035     57035     shaanxi        108.2333       34.5500          102       153     2012      11        22        327              0.109083       7.758270       0.000000       0.280302       0.128000   -9999.000000       0.090600   -9999.000000
57035     57035     shaanxi        108.2333       34.5500          102       153     2012      11        23        328              0.104875       4.982147       0.000000       0.277390   -9999.000000   -9999.000000       0.096300       0.186000
57035     57035     shaanxi        108.2333       34.5500          102       153     2012      11        24        329              0.104375       4.273102       2.655033       0.268474   -9999.000000   -9999.000000   -9999.000000   -9999.000000
57035     57035     shaanxi        108.2333       34.5500          102       153     2012      11        25        330              0.125458       3.846954       2.394616       0.274861       0.134000   -9999.000000       0.104000       0.383000
57035     57035     shaanxi        108.2333       34.5500          102       153     2012      11        26        331              0.128042       3.173431       0.689941       0.265534       0.124000       0.280000   -9999.000000   -9999.000000
57035     57035     shaanxi        108.2333       34.5500          102       153     2012      11        27        332              0.129208       3.153412       0.122529       0.260753       0.136000   -9999.000000       0.094400   -9999.000000
57035     57035     shaanxi        108.2333       34.5500          102       153     2012      11        28        333              0.127083       4.232117       0.000000       0.268995       0.127000   -9999.000000       0.089400       0.161000
57035     57035     shaanxi        108.2333       34.5500          102       153     2012      11        29        334              0.124708       2.069916       0.000000       0.246436   -9999.000000       0.257400       0.092800   -9999.000000
57035     57035     shaanxi        108.2333       34.5500          102       153     2012      11        30        335              0.123375       0.691528       0.000000       0.229925   -9999.000000   -9999.000000   -9999.000000       0.295000
57035     57035     shaanxi        108.2333       34.5500          102       153     2012      12        01        336              0.124083       1.464050       0.000000       0.246743       0.115000   -9999.000000       0.090700   -9999.000000
57035     57035     shaanxi        108.2333       34.5500          102       153     2012      12        02        337              0.122583       1.938599       0.000000       0.251064       0.138000   -9999.000000       0.092700   -9999.000000
57035     57035     shaanxi        108.2333       34.5500          102       153     2012      12        03        338              0.121042       2.178558       0.000000       0.255428       0.130000   -9999.000000       0.077100       0.179000
57035     57035     shaanxi        108.2333       34.5500          102       153     2012      12        04        339              0.120542       2.793976       0.000000       0.255072   -9999.000000       0.089000       0.087600   -9999.000000
57035     57035     shaanxi        108.2333       34.5500          102       153     2012      12        05        340              0.118458       3.913116       0.000000       0.264935   -9999.000000   -9999.000000   -9999.000000       0.219000
57035     57035     shaanxi        108.2333       34.5500          102       153     2012      12        06        341              0.117250       3.245758       0.000000       0.254907       0.119000       0.102500   -9999.000000   -9999.000000
57035     57035     shaanxi        108.2333       34.5500          102       153     2012      12        07        342              0.115750       3.923523       0.000000       0.264053       0.119000   -9999.000000       0.062700       0.177000
57035     57035     shaanxi        108.2333       34.5500          102       153     2012      12        08        343              0.113625       4.023621       0.000000       0.263496       0.124000   -9999.000000       0.086100       0.182000
57035     57035     shaanxi        108.2333       34.5500          102       153     2012      12        09        344              0.111417       1.576508       0.000000       0.235137       0.135000       0.096300       0.077900   -9999.000000
57035     57035     shaanxi        108.2333       34.5500          102       153     2012      12        10        345              0.109417       0.697784       0.000000       0.224767   -9999.000000   -9999.000000       0.077600       0.161000
57035     57035     shaanxi        108.2333       34.5500          102       153     2012      12        11        346              0.104667       1.951813       0.000000       0.238667       0.111000   -9999.000000   -9999.000000   -9999.000000
57035     57035     shaanxi        108.2333       34.5500          102       153     2012      12        12        347              0.104333       0.239624       0.000000       0.219741       0.107000   -9999.000000       0.080700       0.097000
57035     57035     shaanxi        108.2333       34.5500          102       153     2012      12        13        348              0.105833      -0.006866       0.000000       0.212654   -9999.000000   -9999.000000       0.063400       0.143000
57035     57035     shaanxi        108.2333       34.5500          102       153     2012      12        14        349              0.106250      -0.568146       0.000000       0.202914       0.118000       0.066900       0.086600       0.183000
57035     57035     shaanxi        108.2333       34.5500          102       153     2012      12        15        350              0.000000       0.590637       0.000000       0.225359   -9999.000000   -9999.000000       0.087800       0.185000
57035     57035     shaanxi        108.2333       34.5500          102       153     2012      12        16        351              0.104792       0.044586       0.351629       0.219280   -9999.000000   -9999.000000       0.084100   -9999.000000
57035     57035     shaanxi        108.2333       34.5500          102       153     2012      12        17        352              0.104000       1.069336       0.000000       0.240260       0.108000       0.322700   -9999.000000       0.144000
57035     57035     shaanxi        108.2333       34.5500          102       153     2012      12        18        353              0.101625       1.205902       0.000000       0.239818       0.114000   -9999.000000       0.077500       0.009000
57035     57035     shaanxi        108.2333       34.5500          102       153     2012      12        19        354              0.100917       0.631073       0.000000       0.223432       0.120000       0.114500       0.090400       0.127000
57035     57035     shaanxi        108.2333       34.5500          102       153     2012      12        20        355              0.000000       0.304138       0.608969       0.221468   -9999.000000   -9999.000000       0.082100       0.199000
57035     57035     shaanxi        108.2333       34.5500          102       153     2012      12        21        356              0.100417      -0.700623       0.000000       0.207194   -9999.000000   -9999.000000       0.086700   -9999.000000
57035     57035     shaanxi        108.2333       34.5500          102       153     2012      12        22        357              0.097375      -0.462738       0.000000       0.209346   -9999.000000       0.236000   -9999.000000       0.039000
57035     57035     shaanxi        108.2333       34.5500          102       153     2012      12        23        358              0.090000      -2.247589       0.000000       0.192456   -9999.000000   -9999.000000   -9999.000000   -9999.000000
57035     57035     shaanxi        108.2333       34.5500          102       153     2012      12        24        359              0.086684      -4.072510       0.000000       0.169933       0.102000   -9999.000000       0.058400       0.062000
57035     57035     shaanxi        108.2333       34.5500          102       153     2012      12        25        360              0.089500      -2.794037       0.000000       0.179614       0.105000   -9999.000000       0.083400   -9999.000000
57035     57035     shaanxi        108.2333       34.5500          102       153     2012      12        26        361              0.000000      -1.932983       0.000000       0.187636   -9999.000000   -9999.000000       0.077400   -9999.000000
57035     57035     shaanxi        108.2333       34.5500          102       153     2012      12        27        362              0.087545      -3.285187       0.000000       0.174519   -9999.000000       0.111400       0.079700       0.010000
57035     57035     shaanxi        108.2333       34.5500          102       153     2012      12        28        363              0.000000      -2.630035       0.000000       0.180440   -9999.000000   -9999.000000   -9999.000000   -9999.000000
57035     57035     shaanxi        108.2333       34.5500          102       153     2012      12        29        364              0.000000      -2.258362       0.000000       0.184056   -9999.000000   -9999.000000       0.074400       0.036000
57035     57035     shaanxi        108.2333       34.5500          102       153     2012      12        30        365              0.000000      -4.896332       0.000000       0.163205       0.099000   -9999.000000       0.070400   -9999.000000
57035     57035     shaanxi        108.2333       34.5500          102       153     2012      12        31        366              0.088933      -2.284485       0.000000       0.186427   -9999.000000   -9999.000000       0.076400   -9999.000000
