# Supplementary material for: Research on Fusing Multisatellite Soil Moisture Data Based on Bayesian Model Averaging
Source: Hindawi journal article supplement (doi:10.1155/2018/9310838), 2018-06-25
Supplement: f1 [file 9310838.f1.zip › 2012_sm00-10cm_daily_ZDB_ZHY_57038_366days_allin.txt]

57038     57038     shaanxi        108.4500       34.2833          103       154     2012      01        01        001              0.000000   -9999.000000       6.452475   -9999.000000   -9999.000000   -9999.000000       0.054500   -9999.000000
57038     57038     shaanxi        108.4500       34.2833          103       154     2012      01        02        002              0.090375       0.223236       0.000000       0.207583       0.107000   -9999.000000   -9999.000000       0.273000
57038     57038     shaanxi        108.4500       34.2833          103       154     2012      01        03        003              0.000000       1.501587      10.040055       0.217080   -9999.000000   -9999.000000       0.048800   -9999.000000
57038     57038     shaanxi        108.4500       34.2833          103       154     2012      01        04        004              0.074391       0.491394       0.000000       0.210091   -9999.000000   -9999.000000       0.031800       0.015000
57038     57038     shaanxi        108.4500       34.2833          103       154     2012      01        05        005              0.067208      -0.980743       0.000000       0.194935   -9999.000000   -9999.000000       0.045100       0.117000
57038     57038     shaanxi        108.4500       34.2833          103       154     2012      01        06        006              0.068417      -1.522034       0.000000       0.190143   -9999.000000   -9999.000000       0.055300       0.195000
57038     57038     shaanxi        108.4500       34.2833          103       154     2012      01        07        007              0.075917      -0.134644       0.000000       0.200100   -9999.000000   -9999.000000       0.048500       0.022000
57038     57038     shaanxi        108.4500       34.2833          103       154     2012      01        08        008              0.000000      -0.520325       0.422792       0.199515   -9999.000000   -9999.000000   -9999.000000   -9999.000000
57038     57038     shaanxi        108.4500       34.2833          103       154     2012      01        09        009              0.077667       0.340912       4.784594       0.206305   -9999.000000   -9999.000000   -9999.000000       0.036000
57038     57038     shaanxi        108.4500       34.2833          103       154     2012      01        10        010              0.078000       0.908569       7.582181       0.211200   -9999.000000   -9999.000000       0.041500   -9999.000000
57038     57038     shaanxi        108.4500       34.2833          103       154     2012      01        11        011              0.076042       0.122009       0.566426       0.210156       0.095000   -9999.000000       0.037700       0.075000
57038     57038     shaanxi        108.4500       34.2833          103       154     2012      01        12        012              0.075417       0.314423       0.278829       0.211062       0.109000   -9999.000000       0.045300       0.012000
57038     57038     shaanxi        108.4500       34.2833          103       154     2012      01        13        013              0.077917       0.480408       0.000000       0.212181       0.103000   -9999.000000   -9999.000000   -9999.000000
57038     57038     shaanxi        108.4500       34.2833          103       154     2012      01        14        014              0.077250       0.826263       0.133273       0.218362   -9999.000000   -9999.000000   -9999.000000       0.106000
57038     57038     shaanxi        108.4500       34.2833          103       154     2012      01        15        015              0.073708       1.386169       0.000000       0.221142   -9999.000000   -9999.000000       0.014600   -9999.000000
57038     57038     shaanxi        108.4500       34.2833          103       154     2012      01        16        016              0.073708       0.783844       0.000000       0.214359   -9999.000000   -9999.000000       0.033800       0.191000
57038     57038     shaanxi        108.4500       34.2833          103       154     2012      01        17        017              0.000000       0.403961       0.368512       0.213568       0.108000   -9999.000000       0.036000   -9999.000000
57038     57038     shaanxi        108.4500       34.2833          103       154     2012      01        18        018              0.075292       1.162323       1.454252       0.220521   -9999.000000   -9999.000000       0.038400   -9999.000000
57038     57038     shaanxi        108.4500       34.2833          103       154     2012      01        19        019              0.077000      -0.191620       0.000000       0.209383   -9999.000000   -9999.000000   -9999.000000       0.253000
57038     57038     shaanxi        108.4500       34.2833          103       154     2012      01        20        020              0.095125       0.382385       2.453511       0.216490   -9999.000000   -9999.000000       0.037600   -9999.000000
57038     57038     shaanxi        108.4500       34.2833          103       154     2012      01        21        021              0.122792       0.549591      10.964208       0.220944   -9999.000000   -9999.000000       0.024500       0.273000
57038     57038     shaanxi        108.4500       34.2833          103       154     2012      01        22        022              0.136333      -0.216370       0.498903       0.210044       0.107000   -9999.000000       0.025800   -9999.000000
57038     57038     shaanxi        108.4500       34.2833          103       154     2012      01        23        023              0.128542      -2.289398       0.639207       0.184719   -9999.000000   -9999.000000       0.032700       0.081000
57038     57038     shaanxi        108.4500       34.2833          103       154     2012      01        24        024              0.108042      -2.814636       0.233800       0.176660   -9999.000000   -9999.000000   -9999.000000       0.073000
57038     57038     shaanxi        108.4500       34.2833          103       154     2012      01        25        025              0.080667      -3.306274       0.000000       0.176488   -9999.000000   -9999.000000   -9999.000000   -9999.000000
57038     57038     shaanxi        108.4500       34.2833          103       154     2012      01        26        026              0.076583      -2.542755       0.000000       0.181451       0.100000   -9999.000000       0.018500       0.026000
57038     57038     shaanxi        108.4500       34.2833          103       154     2012      01        27        027              0.082958      -1.484314       0.000000       0.190532   -9999.000000   -9999.000000       0.024700   -9999.000000
57038     57038     shaanxi        108.4500       34.2833          103       154     2012      01        28        028              0.140792      -0.044708       0.000000       0.202956   -9999.000000       0.055700       0.037500       0.325000
57038     57038     shaanxi        108.4500       34.2833          103       154     2012      01        29        029              0.160917       1.323486       0.000000       0.215402   -9999.000000   -9999.000000       0.042800       0.276000
57038     57038     shaanxi        108.4500       34.2833          103       154     2012      01        30        030              0.159167       1.400055       0.000000       0.217664   -9999.000000   -9999.000000   -9999.000000       0.415000
57038     57038     shaanxi        108.4500       34.2833          103       154     2012      01        31        031              0.152458       1.907227       0.000000       0.220217   -9999.000000   -9999.000000       0.037000       0.447000
57038     57038     shaanxi        108.4500       34.2833          103       154     2012      02        01        032              0.148083       3.054382       0.000000       0.229723   -9999.000000   -9999.000000       0.017000   -9999.000000
57038     57038     shaanxi        108.4500       34.2833          103       154     2012      02        02        033              0.116250       2.459442       0.000000       0.225058   -9999.000000   -9999.000000       0.034400       0.172000
57038     57038     shaanxi        108.4500       34.2833          103       154     2012      02        03        034              0.104125       0.858704       0.000000       0.211912       0.108000   -9999.000000       0.048700       0.266000
57038     57038     shaanxi        108.4500       34.2833          103       154     2012      02        04        035              0.106583       2.001038       0.000000       0.218393   -9999.000000   -9999.000000       0.051500       0.524000
57038     57038     shaanxi        108.4500       34.2833          103       154     2012      02        05        036              0.101875       2.219086       0.000000       0.222472   -9999.000000       0.098200   -9999.000000       0.119000
57038     57038     shaanxi        108.4500       34.2833          103       154     2012      02        06        037              0.096292       3.286469       0.000000       0.228529   -9999.000000   -9999.000000       0.039000   -9999.000000
57038     57038     shaanxi        108.4500       34.2833          103       154     2012      02        07        038              0.083625       2.571564       0.000000       0.219989   -9999.000000   -9999.000000       0.031900       0.032000
57038     57038     shaanxi        108.4500       34.2833          103       154     2012      02        08        039              0.079917       0.147278       0.000000       0.203040   -9999.000000   -9999.000000       0.040000   -9999.000000
57038     57038     shaanxi        108.4500       34.2833          103       154     2012      02        09        040              0.079667      -0.084259       0.000000       0.199321   -9999.000000   -9999.000000       0.044800       0.173000
57038     57038     shaanxi        108.4500       34.2833          103       154     2012      02        10        041              0.081125       0.247162       0.000000       0.202131   -9999.000000   -9999.000000   -9999.000000   -9999.000000
57038     57038     shaanxi        108.4500       34.2833          103       154     2012      02        11        042              0.079083       1.417206       0.000000       0.207622       0.098000   -9999.000000   -9999.000000   -9999.000000
57038     57038     shaanxi        108.4500       34.2833          103       154     2012      02        12        043              0.080792       2.198395       0.000000       0.212359   -9999.000000   -9999.000000   -9999.000000       0.162000
57038     57038     shaanxi        108.4500       34.2833          103       154     2012      02        13        044              0.080083       3.082001       0.000000       0.219149   -9999.000000   -9999.000000       0.010600   -9999.000000
57038     57038     shaanxi        108.4500       34.2833          103       154     2012      02        14        045              0.080250       3.265045       0.000000       0.221416       0.107000   -9999.000000   -9999.000000       0.221000
57038     57038     shaanxi        108.4500       34.2833          103       154     2012      02        15        046              0.079333       4.729553       0.000000       0.225955   -9999.000000   -9999.000000       0.047700   -9999.000000
57038     57038     shaanxi        108.4500       34.2833          103       154     2012      02        16        047              0.079667       3.163391       0.000000       0.227074       0.103000   -9999.000000   -9999.000000   -9999.000000
57038     57038     shaanxi        108.4500       34.2833          103       154     2012      02        17        048              0.078208       3.186432       0.000000       0.220797       0.101000   -9999.000000       0.040300       0.123000
57038     57038     shaanxi        108.4500       34.2833          103       154     2012      02        18        049              0.077583       1.876129       0.000000       0.212976       0.110000   -9999.000000       0.011900   -9999.000000
57038     57038     shaanxi        108.4500       34.2833          103       154     2012      02        19        050              0.077542       2.387115       0.000000       0.211137       0.108000   -9999.000000       0.038800       0.250000
57038     57038     shaanxi        108.4500       34.2833          103       154     2012      02        20        051              0.077500       3.904602       0.000000       0.216085   -9999.000000   -9999.000000       0.039500   -9999.000000
57038     57038     shaanxi        108.4500       34.2833          103       154     2012      02        21        052              0.076875       4.874451       0.000000       0.219130   -9999.000000   -9999.000000   -9999.000000       0.165000
57038     57038     shaanxi        108.4500       34.2833          103       154     2012      02        22        053              0.077583       4.639709       0.000000       0.219741       0.094000   -9999.000000   -9999.000000       0.253000
57038     57038     shaanxi        108.4500       34.2833          103       154     2012      02        23        054              0.076292       6.304779       0.000000       0.220831       0.110000   -9999.000000       0.040900   -9999.000000
57038     57038     shaanxi        108.4500       34.2833          103       154     2012      02        24        055              0.076875       3.582214       0.000000       0.220260       0.104000   -9999.000000       0.032800       0.158000
57038     57038     shaanxi        108.4500       34.2833          103       154     2012      02        25        056              0.075667       4.567047       0.000000       0.219491   -9999.000000   -9999.000000       0.038000   -9999.000000
57038     57038     shaanxi        108.4500       34.2833          103       154     2012      02        26        057              0.076000       2.440308       0.821598       0.217069   -9999.000000   -9999.000000       0.045800       0.352000
57038     57038     shaanxi        108.4500       34.2833          103       154     2012      02        27        058              0.076000       2.521179       0.000000       0.215920       0.095000   -9999.000000   -9999.000000       0.101000
57038     57038     shaanxi        108.4500       34.2833          103       154     2012      02        28        059              0.076833       2.266266       0.000000       0.215367       0.099000   -9999.000000   -9999.000000       0.293000
57038     57038     shaanxi        108.4500       34.2833          103       154     2012      02        29        060              0.000000   -9999.000000       0.167113   -9999.000000       0.105000   -9999.000000   -9999.000000   -9999.000000
57038     57038     shaanxi        108.4500       34.2833          103       154     2012      03        01        061              0.086083       2.834656       0.148412       0.219034   -9999.000000   -9999.000000       0.042400   -9999.000000
57038     57038     shaanxi        108.4500       34.2833          103       154     2012      03        02        062              0.088292       3.112610       0.000000       0.224281   -9999.000000   -9999.000000       0.038500       0.354000
57038     57038     shaanxi        108.4500       34.2833          103       154     2012      03        03        063              0.084625       3.792725       0.000000       0.225597       0.132000   -9999.000000       0.041700       0.293000
57038     57038     shaanxi        108.4500       34.2833          103       154     2012      03        04        064              0.082583       3.672974       0.000000       0.223711       0.121000   -9999.000000   -9999.000000       0.301000
57038     57038     shaanxi        108.4500       34.2833          103       154     2012      03        05        065              0.082083       3.132019       0.000000       0.223225       0.126000   -9999.000000       0.040000       0.166000
57038     57038     shaanxi        108.4500       34.2833          103       154     2012      03        06        066              0.081125       5.011993       0.000000       0.223865       0.115000   -9999.000000       0.018400   -9999.000000
57038     57038     shaanxi        108.4500       34.2833          103       154     2012      03        07        067              0.000000       5.171967       0.879531       0.220873   -9999.000000   -9999.000000       0.044200       0.101000
57038     57038     shaanxi        108.4500       34.2833          103       154     2012      03        08        068              0.083750       5.545319       0.038406       0.219488   -9999.000000   -9999.000000       0.046800   -9999.000000
57038     57038     shaanxi        108.4500       34.2833          103       154     2012      03        09        069              0.086375       5.017181       0.000000       0.220785       0.137000   -9999.000000       0.044400       0.192000
57038     57038     shaanxi        108.4500       34.2833          103       154     2012      03        10        070              0.086000       6.154236       0.000000       0.220094       0.122000   -9999.000000   -9999.000000       0.145000
57038     57038     shaanxi        108.4500       34.2833          103       154     2012      03        11        071              0.082167       9.431854       0.000000       0.215227       0.105000   -9999.000000       0.037800   -9999.000000
57038     57038     shaanxi        108.4500       34.2833          103       154     2012      03        12        072              0.079750       8.422241       0.000000       0.209759   -9999.000000   -9999.000000       0.039200       0.096000
57038     57038     shaanxi        108.4500       34.2833          103       154     2012      03        13        073              0.079542       8.243927       0.000000       0.206817       0.102000   -9999.000000       0.036400   -9999.000000
57038     57038     shaanxi        108.4500       34.2833          103       154     2012      03        14        074              0.079000      11.059784       0.555790       0.203285       0.100000   -9999.000000   -9999.000000       0.155000
57038     57038     shaanxi        108.4500       34.2833          103       154     2012      03        15        075              0.082750      11.209259       0.000000       0.201290       0.124000   -9999.000000   -9999.000000   -9999.000000
57038     57038     shaanxi        108.4500       34.2833          103       154     2012      03        16        076              0.085542       7.432922       0.000000       0.203932       0.105000   -9999.000000   -9999.000000   -9999.000000
57038     57038     shaanxi        108.4500       34.2833          103       154     2012      03        17        077              0.084292      11.895081       0.000000       0.201749   -9999.000000   -9999.000000       0.020900       0.153000
57038     57038     shaanxi        108.4500       34.2833          103       154     2012      03        18        078              0.081917      14.013763       0.000000       0.197410       0.106000   -9999.000000       0.038900   -9999.000000
57038     57038     shaanxi        108.4500       34.2833          103       154     2012      03        19        079              0.077792      14.407867       0.000000       0.192038       0.095500   -9999.000000       0.047300       0.045000
57038     57038     shaanxi        108.4500       34.2833          103       154     2012      03        20        080              0.077375       8.854370       0.000000       0.191857       0.100500   -9999.000000       0.049400   -9999.000000
57038     57038     shaanxi        108.4500       34.2833          103       154     2012      03        21        081              0.076125       8.347900       0.121010       0.193523       0.172000   -9999.000000   -9999.000000       0.131000
57038     57038     shaanxi        108.4500       34.2833          103       154     2012      03        22        082              0.078625       6.047821       0.000000       0.195902   -9999.000000   -9999.000000       0.054900       0.210000
57038     57038     shaanxi        108.4500       34.2833          103       154     2012      03        23        083              0.080783       7.321564       0.000000       0.198138   -9999.000000   -9999.000000       0.026200   -9999.000000
57038     57038     shaanxi        108.4500       34.2833          103       154     2012      03        24        084              0.080000      10.482849       0.000000       0.192149       0.123000   -9999.000000       0.039000       0.099000
57038     57038     shaanxi        108.4500       34.2833          103       154     2012      03        25        085              0.000000      12.950409       0.000000       0.185955       0.131000   -9999.000000       0.046800   -9999.000000
57038     57038     shaanxi        108.4500       34.2833          103       154     2012      03        26        086              0.078125      15.071594       0.000000       0.182174       0.136000   -9999.000000       0.049600       0.078000
57038     57038     shaanxi        108.4500       34.2833          103       154     2012      03        27        087              0.076625      16.277649       0.000000       0.179389       0.127000   -9999.000000   -9999.000000       0.092000
57038     57038     shaanxi        108.4500       34.2833          103       154     2012      03        28        088              0.077083      16.752625       0.222766       0.177764       0.184000   -9999.000000       0.066200       0.166000
57038     57038     shaanxi        108.4500       34.2833          103       154     2012      03        29        089              0.082667      12.611023       0.000000       0.181328       0.135000   -9999.000000       0.060200       0.030000
57038     57038     shaanxi        108.4500       34.2833          103       154     2012      03        30        090              0.078917      17.413055       0.000000       0.180769       0.123000   -9999.000000       0.052700   -9999.000000
57038     57038     shaanxi        108.4500       34.2833          103       154     2012      03        31        091              0.077250      14.787323       0.000000       0.176981       0.137000   -9999.000000       0.057300       0.007000
57038     57038     shaanxi        108.4500       34.2833          103       154     2012      04        01        092              0.075167      17.409607       0.000000       0.172710       0.167000   -9999.000000   -9999.000000       0.135000
57038     57038     shaanxi        108.4500       34.2833          103       154     2012      04        02        093              0.071375      18.899811       0.000000       0.171480   -9999.000000   -9999.000000   -9999.000000       0.144000
57038     57038     shaanxi        108.4500       34.2833          103       154     2012      04        03        094              0.069625      16.088287       0.000000       0.170798       0.155000   -9999.000000       0.034100       0.003000
57038     57038     shaanxi        108.4500       34.2833          103       154     2012      04        04        095              0.068000      16.995483       0.000000       0.169176       0.143000   -9999.000000       0.051900   -9999.000000
57038     57038     shaanxi        108.4500       34.2833          103       154     2012      04        05        096              0.064833      19.710480       0.000000       0.167695       0.148000   -9999.000000       0.053400       0.001000
57038     57038     shaanxi        108.4500       34.2833          103       154     2012      04        06        097              0.062625      18.566650       0.000000       0.166551       0.151000   -9999.000000       0.054500   -9999.000000
57038     57038     shaanxi        108.4500       34.2833          103       154     2012      04        07        098              0.060875      19.017731       0.000000       0.166100   -9999.000000   -9999.000000   -9999.000000       0.087000
57038     57038     shaanxi        108.4500       34.2833          103       154     2012      04        08        099              0.059417      20.384460       0.000000       0.165521       0.158000   -9999.000000       0.052000       0.060000
57038     57038     shaanxi        108.4500       34.2833          103       154     2012      04        09        100              0.057083      22.156952       0.169281       0.164809       0.162500   -9999.000000       0.044100   -9999.000000
57038     57038     shaanxi        108.4500       34.2833          103       154     2012      04        10        101              0.057167      19.347626       0.000000       0.166915       0.137500   -9999.000000       0.065200       0.056000
57038     57038     shaanxi        108.4500       34.2833          103       154     2012      04        11        102              0.055292      21.953278       3.156173       0.165637       0.175000   -9999.000000       0.072900   -9999.000000
57038     57038     shaanxi        108.4500       34.2833          103       154     2012      04        12        103              0.053208      20.218750       0.875688       0.173480       0.220000   -9999.000000       0.072300       0.058000
57038     57038     shaanxi        108.4500       34.2833          103       154     2012      04        13        104              0.054667      15.088593       0.000000       0.207042       0.196000   -9999.000000   -9999.000000   -9999.000000
57038     57038     shaanxi        108.4500       34.2833          103       154     2012      04        14        105              0.053458      18.483582       0.000000       0.186985       0.181000   -9999.000000       0.066000   -9999.000000
57038     57038     shaanxi        108.4500       34.2833          103       154     2012      04        15        106              0.052667      19.272369       0.000000       0.175817       0.171500   -9999.000000       0.066000       0.040000
57038     57038     shaanxi        108.4500       34.2833          103       154     2012      04        16        107              0.051250      21.747833       2.354888       0.168787       0.163000   -9999.000000       0.077700   -9999.000000
57038     57038     shaanxi        108.4500       34.2833          103       154     2012      04        17        108              0.048750      22.668427       1.783201       0.184756       0.198000   -9999.000000       0.084900       0.015000
57038     57038     shaanxi        108.4500       34.2833          103       154     2012      04        18        109              0.048458      19.640137       0.412973       0.196796       0.191000   -9999.000000   -9999.000000   -9999.000000
57038     57038     shaanxi        108.4500       34.2833          103       154     2012      04        19        110              0.046542      21.968964       0.502411       0.180520       0.202000   -9999.000000   -9999.000000       0.230000
57038     57038     shaanxi        108.4500       34.2833          103       154     2012      04        20        111              0.046333      19.259491       0.191893       0.176836       0.169500   -9999.000000       0.041300       0.114000
57038     57038     shaanxi        108.4500       34.2833          103       154     2012      04        21        112              0.045917      21.389099       0.088555       0.172402       0.219500   -9999.000000       0.077600   -9999.000000
57038     57038     shaanxi        108.4500       34.2833          103       154     2012      04        22        113              0.044333      23.826691       0.000000       0.165610       0.201000   -9999.000000   -9999.000000       0.204000
57038     57038     shaanxi        108.4500       34.2833          103       154     2012      04        23        114              0.043125      25.581085       2.905493       0.162616   -9999.000000   -9999.000000       0.095100   -9999.000000
57038     57038     shaanxi        108.4500       34.2833          103       154     2012      04        24        115              0.054750      22.706024       0.000000       0.188635       0.244000   -9999.000000   -9999.000000       0.485000
57038     57038     shaanxi        108.4500       34.2833          103       154     2012      04        25        116              0.000000      19.548492       0.000000       0.191567       0.180000   -9999.000000       0.097000       0.097000
57038     57038     shaanxi        108.4500       34.2833          103       154     2012      04        26        117              0.053750      20.936951       0.000000       0.172939       0.192000   -9999.000000       0.071000       0.169000
57038     57038     shaanxi        108.4500       34.2833          103       154     2012      04        27        118              0.051750      24.356598       0.000000       0.164145       0.184000   -9999.000000       0.089900       0.091000
57038     57038     shaanxi        108.4500       34.2833          103       154     2012      04        28        119              0.048167      26.848206       5.524731       0.160805   -9999.000000   -9999.000000       0.096300   -9999.000000
57038     57038     shaanxi        108.4500       34.2833          103       154     2012      04        29        120              0.047792      26.368530       0.000000       0.202248       0.227000   -9999.000000       0.088700       0.118000
57038     57038     shaanxi        108.4500       34.2833          103       154     2012      04        30        121              0.045875      24.714294       0.000000       0.210226       0.241500   -9999.000000   -9999.000000       0.282000
57038     57038     shaanxi        108.4500       34.2833          103       154     2012      05        01        122              0.046208      21.913574       0.000000       0.190169       0.251000   -9999.000000       0.119100       0.260000
57038     57038     shaanxi        108.4500       34.2833          103       154     2012      05        02        123              0.048083      20.218445       1.286490       0.184324       0.258000   -9999.000000       0.128000       0.482000
57038     57038     shaanxi        108.4500       34.2833          103       154     2012      05        03        124              0.050875      20.295044       0.000000       0.193661       0.260000   -9999.000000       0.119700   -9999.000000
57038     57038     shaanxi        108.4500       34.2833          103       154     2012      05        04        125              0.053333      21.404022       0.000000       0.191408       0.223000   -9999.000000       0.115900       0.131000
57038     57038     shaanxi        108.4500       34.2833          103       154     2012      05        05        126              0.053000      24.628693       0.000000       0.177943       0.220000   -9999.000000   -9999.000000   -9999.000000
57038     57038     shaanxi        108.4500       34.2833          103       154     2012      05        06        127              0.050292      27.333160       0.948800       0.166555       0.184500   -9999.000000       0.113200       0.166000
57038     57038     shaanxi        108.4500       34.2833          103       154     2012      05        07        128              0.047208      27.009003       1.061421       0.163029   -9999.000000   -9999.000000       0.066500       0.256000
57038     57038     shaanxi        108.4500       34.2833          103       154     2012      05        08        129              0.048083      25.828613       0.924375       0.164921       0.191000   -9999.000000       0.100600   -9999.000000
57038     57038     shaanxi        108.4500       34.2833          103       154     2012      05        09        130              0.047167      29.761108       0.000000       0.162907   -9999.000000   -9999.000000       0.098800       0.222000
57038     57038     shaanxi        108.4500       34.2833          103       154     2012      05        10        131              0.047875      27.825684       9.970342       0.162059   -9999.000000   -9999.000000       0.102800   -9999.000000
57038     57038     shaanxi        108.4500       34.2833          103       154     2012      05        11        132              0.073458      29.528534       0.493789       0.180063       0.240000   -9999.000000   -9999.000000       0.527000
57038     57038     shaanxi        108.4500       34.2833          103       154     2012      05        12        133              0.070917      22.358002       0.000000       0.262251       0.208500   -9999.000000       0.108900   -9999.000000
57038     57038     shaanxi        108.4500       34.2833          103       154     2012      05        13        134              0.062792      21.452026       0.856792       0.223785   -9999.000000   -9999.000000       0.098900   -9999.000000
57038     57038     shaanxi        108.4500       34.2833          103       154     2012      05        14        135              0.060583      19.311005       0.000000       0.213902   -9999.000000   -9999.000000       0.136700       0.262000
57038     57038     shaanxi        108.4500       34.2833          103       154     2012      05        15        136              0.055833      22.707306       0.502212       0.197371       0.201000   -9999.000000       0.138300   -9999.000000
57038     57038     shaanxi        108.4500       34.2833          103       154     2012      05        16        137              0.050542      24.632355       0.000000       0.178209       0.171000   -9999.000000   -9999.000000       0.257000
57038     57038     shaanxi        108.4500       34.2833          103       154     2012      05        17        138              0.046500      26.600800       0.606643       0.168477       0.175000   -9999.000000   -9999.000000   -9999.000000
57038     57038     shaanxi        108.4500       34.2833          103       154     2012      05        18        139              0.042667      27.315216       0.000000       0.164074       0.192000   -9999.000000       0.113000       0.406000
57038     57038     shaanxi        108.4500       34.2833          103       154     2012      05        19        140              0.039875      28.702057       0.000000       0.161925   -9999.000000   -9999.000000       0.136500       0.254000
57038     57038     shaanxi        108.4500       34.2833          103       154     2012      05        20        141              0.038375      30.378204       0.000000       0.160266   -9999.000000   -9999.000000       0.128700   -9999.000000
57038     57038     shaanxi        108.4500       34.2833          103       154     2012      05        21        142              0.095500      29.502319      25.015453       0.159476       0.260000   -9999.000000       0.151600       0.834000
57038     57038     shaanxi        108.4500       34.2833          103       154     2012      05        22        143              0.158292      20.345978       0.468476       0.320464       0.220500   -9999.000000   -9999.000000   -9999.000000
57038     57038     shaanxi        108.4500       34.2833          103       154     2012      05        23        144              0.144250      20.622253       0.218126       0.290750   -9999.000000   -9999.000000       0.130700       0.659000
57038     57038     shaanxi        108.4500       34.2833          103       154     2012      05        24        145              0.129042      20.476471       0.117315       0.267062   -9999.000000   -9999.000000       0.081700       0.460000
57038     57038     shaanxi        108.4500       34.2833          103       154     2012      05        25        146              0.000000      19.585297       0.000000       0.255166       0.200000   -9999.000000       0.118000       0.522000
57038     57038     shaanxi        108.4500       34.2833          103       154     2012      05        26        147              0.089458      22.944885       0.394542       0.236559   -9999.000000   -9999.000000       0.109300       0.403000
57038     57038     shaanxi        108.4500       34.2833          103       154     2012      05        27        148              0.081625      26.119171       0.000000       0.215596       0.180500   -9999.000000       0.111700   -9999.000000
57038     57038     shaanxi        108.4500       34.2833          103       154     2012      05        28        149              0.125833      27.776825      17.968077       0.199468       0.265000   -9999.000000   -9999.000000       0.858000
57038     57038     shaanxi        108.4500       34.2833          103       154     2012      05        29        150              0.178625      21.836639       0.418098       0.274928       0.211000   -9999.000000       0.124200       0.504000
57038     57038     shaanxi        108.4500       34.2833          103       154     2012      05        30        151              0.155333      23.841583       0.000000       0.283095       0.196000   -9999.000000       0.102100   -9999.000000
57038     57038     shaanxi        108.4500       34.2833          103       154     2012      05        31        152              0.125375      25.485260       0.000000       0.252107       0.196000   -9999.000000       0.112200   -9999.000000
57038     57038     shaanxi        108.4500       34.2833          103       154     2012      06        01        153              0.114875      23.939941       0.000000       0.239035       0.107000   -9999.000000       0.113000   -9999.000000
57038     57038     shaanxi        108.4500       34.2833          103       154     2012      06        02        154              0.102375      26.531769       0.000000       0.217987       0.118500   -9999.000000   -9999.000000       0.383000
57038     57038     shaanxi        108.4500       34.2833          103       154     2012      06        03        155              0.093375      27.019653       0.000000       0.201140       0.119000   -9999.000000   -9999.000000   -9999.000000
57038     57038     shaanxi        108.4500       34.2833          103       154     2012      06        04        156              0.091625      25.487885       0.000000       0.193330   -9999.000000       0.098400       0.142300       0.557000
57038     57038     shaanxi        108.4500       34.2833          103       154     2012      06        05        157              0.086042      28.163422       0.325895       0.183506       0.138000   -9999.000000       0.181900       0.437000
57038     57038     shaanxi        108.4500       34.2833          103       154     2012      06        06        158              0.086250      24.300446       0.000000       0.185317       0.112000   -9999.000000       0.159000   -9999.000000
57038     57038     shaanxi        108.4500       34.2833          103       154     2012      06        07        159              0.083375      27.349274       0.000000       0.178354       0.110500   -9999.000000       0.172500       0.405000
57038     57038     shaanxi        108.4500       34.2833          103       154     2012      06        08        160              0.078417      30.355042       0.000000       0.170212       0.127000   -9999.000000   -9999.000000   -9999.000000
57038     57038     shaanxi        108.4500       34.2833          103       154     2012      06        09        161              0.077625      29.015656       0.000000       0.167751   -9999.000000   -9999.000000       0.183200       0.473000
57038     57038     shaanxi        108.4500       34.2833          103       154     2012      06        10        162              0.072458      32.060150       8.032736       0.164324       0.116000   -9999.000000       0.107700   -9999.000000
57038     57038     shaanxi        108.4500       34.2833          103       154     2012      06        11        163              0.000000      32.704071       0.000000       0.162638       0.090500   -9999.000000       0.163500   -9999.000000
57038     57038     shaanxi        108.4500       34.2833          103       154     2012      06        12        164              0.066125      31.122070       0.000000       0.161018       0.088000   -9999.000000       0.156400       0.550000
57038     57038     shaanxi        108.4500       34.2833          103       154     2012      06        13        165              0.063500      33.020782       0.000000       0.159434       0.103000   -9999.000000       0.167700   -9999.000000
57038     57038     shaanxi        108.4500       34.2833          103       154     2012      06        14        166              0.059417      34.756836       0.000000       0.158462       0.100000   -9999.000000   -9999.000000       0.488000
57038     57038     shaanxi        108.4500       34.2833          103       154     2012      06        15        167              0.057583      31.507355       0.000000       0.157184       0.103000   -9999.000000       0.163500   -9999.000000
57038     57038     shaanxi        108.4500       34.2833          103       154     2012      06        16        168              0.056292      31.352661       0.000000       0.156914       0.105000   -9999.000000       0.171900       0.453000
57038     57038     shaanxi        108.4500       34.2833          103       154     2012      06        17        169              0.055250      32.735809       0.000000       0.156068       0.094000   -9999.000000       0.160300       0.573000
57038     57038     shaanxi        108.4500       34.2833          103       154     2012      06        18        170              0.052208      33.902618       0.364638       0.155909       0.109500   -9999.000000       0.150000   -9999.000000
57038     57038     shaanxi        108.4500       34.2833          103       154     2012      06        19        171              0.050417      32.943573       0.000000       0.155788       0.105000   -9999.000000   -9999.000000       0.550000
57038     57038     shaanxi        108.4500       34.2833          103       154     2012      06        20        172              0.119542      31.837982       0.000000       0.156128   -9999.000000   -9999.000000   -9999.000000   -9999.000000
57038     57038     shaanxi        108.4500       34.2833          103       154     2012      06        21        173              0.171208      33.550293       3.491786       0.155014       0.113000   -9999.000000       0.116800       0.497000
57038     57038     shaanxi        108.4500       34.2833          103       154     2012      06        22        174              0.178750      34.041504       0.000000       0.180088       0.087000   -9999.000000       0.146700       0.625000
57038     57038     shaanxi        108.4500       34.2833          103       154     2012      06        23        175              0.178458      32.754395       4.001483       0.179841       0.089000   -9999.000000       0.144300       0.546000
57038     57038     shaanxi        108.4500       34.2833          103       154     2012      06        24        176              0.174500      34.201355       0.341260       0.182962       0.092000   -9999.000000       0.157600       0.504000
57038     57038     shaanxi        108.4500       34.2833          103       154     2012      06        25        177              0.171542      31.497070       2.169519       0.195454   -9999.000000   -9999.000000   -9999.000000   -9999.000000
57038     57038     shaanxi        108.4500       34.2833          103       154     2012      06        26        178              0.172542      27.606934       0.191315       0.205829       0.118000   -9999.000000       0.151100       0.656000
57038     57038     shaanxi        108.4500       34.2833          103       154     2012      06        27        179              0.175417      26.820526       0.000000       0.190943       0.101500   -9999.000000       0.107000       0.646000
57038     57038     shaanxi        108.4500       34.2833          103       154     2012      06        28        180              0.172708      29.484039       1.006641       0.175241       0.119000   -9999.000000       0.153200       0.573000
57038     57038     shaanxi        108.4500       34.2833          103       154     2012      06        29        181              0.297208      28.819763      22.559914       0.170203       0.131000   -9999.000000       0.185700   -9999.000000
57038     57038     shaanxi        108.4500       34.2833          103       154     2012      06        30        182              0.299792      25.259644       0.000000       0.315677       0.121000   -9999.000000       0.167500   -9999.000000
57038     57038     shaanxi        108.4500       34.2833          103       154     2012      07        01        183              0.260625      27.668427       0.287557       0.264720       0.124000   -9999.000000   -9999.000000       0.701000
57038     57038     shaanxi        108.4500       34.2833          103       154     2012      07        02        184              0.338042      29.714783      10.496157       0.235939       0.154000   -9999.000000       0.191200   -9999.000000
57038     57038     shaanxi        108.4500       34.2833          103       154     2012      07        03        185              0.333708      24.402924       2.514564       0.299024       0.118000   -9999.000000       0.171600       0.734000
57038     57038     shaanxi        108.4500       34.2833          103       154     2012      07        04        186              0.363583      29.393311       7.672680       0.264904       0.131000   -9999.000000       0.197500       0.931000
57038     57038     shaanxi        108.4500       34.2833          103       154     2012      07        05        187              0.335708      26.031921       0.000000       0.303885       0.113000   -9999.000000       0.187200   -9999.000000
57038     57038     shaanxi        108.4500       34.2833          103       154     2012      07        06        188              0.292833      29.068848       0.272246       0.263038   -9999.000000   -9999.000000   -9999.000000       0.776000
57038     57038     shaanxi        108.4500       34.2833          103       154     2012      07        07        189              0.285792      29.769958       4.164091       0.240269   -9999.000000   -9999.000000   -9999.000000   -9999.000000
57038     57038     shaanxi        108.4500       34.2833          103       154     2012      07        08        190              0.367167      28.407349      29.151897       0.246124       0.134000   -9999.000000       0.149600       1.000000
57038     57038     shaanxi        108.4500       34.2833          103       154     2012      07        09        191              0.366167      26.076874       9.382953       0.347019       0.152000   -9999.000000       0.208300   -9999.000000
57038     57038     shaanxi        108.4500       34.2833          103       154     2012      07        10        192              0.346000      25.403931       1.115125       0.340860       0.110000       0.300900       0.191500   -9999.000000
57038     57038     shaanxi        108.4500       34.2833          103       154     2012      07        11        193              0.304417      29.730011       6.265685       0.303691   -9999.000000   -9999.000000       0.181600       0.756000
57038     57038     shaanxi        108.4500       34.2833          103       154     2012      07        12        194              0.266542      29.945190       0.090064       0.283621       0.138000   -9999.000000   -9999.000000   -9999.000000
57038     57038     shaanxi        108.4500       34.2833          103       154     2012      07        13        195              0.244125      30.482056       0.175513       0.266777       0.133500   -9999.000000       0.178600       0.690000
57038     57038     shaanxi        108.4500       34.2833          103       154     2012      07        14        196              0.232875      30.051605       0.000000       0.248408       0.133500   -9999.000000       0.138000   -9999.000000
57038     57038     shaanxi        108.4500       34.2833          103       154     2012      07        15        197              0.227750      29.006317       0.221496       0.235365       0.144000   -9999.000000       0.174300       0.649000
57038     57038     shaanxi        108.4500       34.2833          103       154     2012      07        16        198              0.222208      29.791901       0.000000       0.221157       0.129000   -9999.000000       0.169100       0.786000
57038     57038     shaanxi        108.4500       34.2833          103       154     2012      07        17        199              0.217667      29.738098       0.618069       0.208151       0.138000   -9999.000000   -9999.000000   -9999.000000
57038     57038     shaanxi        108.4500       34.2833          103       154     2012      07        18        200              0.213250      29.597321       0.000000       0.197877       0.129000   -9999.000000   -9999.000000       0.626000
57038     57038     shaanxi        108.4500       34.2833          103       154     2012      07        19        201              0.212375      30.874786       0.000000       0.189175       0.127000   -9999.000000       0.148100   -9999.000000
57038     57038     shaanxi        108.4500       34.2833          103       154     2012      07        20        202              0.210826      31.001129       0.299762       0.183370       0.139000   -9999.000000       0.157500       0.610000
57038     57038     shaanxi        108.4500       34.2833          103       154     2012      07        21        203              0.207870      31.677338       5.396632       0.179477   -9999.000000   -9999.000000       0.172400       0.947000
57038     57038     shaanxi        108.4500       34.2833          103       154     2012      07        22        204              0.218375      27.748901       0.000000       0.220909   -9999.000000   -9999.000000       0.158900       0.831000
57038     57038     shaanxi        108.4500       34.2833          103       154     2012      07        23        205              0.213333      29.713104       0.657201       0.218152       0.197000   -9999.000000   -9999.000000       0.805000
57038     57038     shaanxi        108.4500       34.2833          103       154     2012      07        24        206              0.216542      26.708771       0.600531       0.207948       0.163000   -9999.000000       0.152000   -9999.000000
57038     57038     shaanxi        108.4500       34.2833          103       154     2012      07        25        207              0.213583      29.568909       0.000000       0.195787       0.164000   -9999.000000       0.100900       0.640000
57038     57038     shaanxi        108.4500       34.2833          103       154     2012      07        26        208              0.214417      30.567444       0.000000       0.185237       0.158000   -9999.000000       0.143700       0.705000
57038     57038     shaanxi        108.4500       34.2833          103       154     2012      07        27        209              0.141250      34.123962       0.000000       0.173917   -9999.000000   -9999.000000       0.137600       0.669000
57038     57038     shaanxi        108.4500       34.2833          103       154     2012      07        28        210              0.122125      35.774078       0.000000       0.167651       0.162000   -9999.000000       0.141000       0.540000
57038     57038     shaanxi        108.4500       34.2833          103       154     2012      07        29        211              0.117083      37.019104       0.000000       0.164051       0.145000   -9999.000000   -9999.000000   -9999.000000
57038     57038     shaanxi        108.4500       34.2833          103       154     2012      07        30        212              0.110833      37.660217       1.295701       0.162423       0.165500   -9999.000000       0.129700       0.661000
57038     57038     shaanxi        108.4500       34.2833          103       154     2012      07        31        213              0.108333      32.950531       0.000000       0.171033       0.177000   -9999.000000       0.112800   -9999.000000
57038     57038     shaanxi        108.4500       34.2833          103       154     2012      08        01        214              0.105792      30.772949       0.323822       0.170676       0.192000   -9999.000000       0.127400       0.683000
57038     57038     shaanxi        108.4500       34.2833          103       154     2012      08        02        215              0.107375      28.812256       0.746003       0.168396       0.219000   -9999.000000       0.127600       0.535000
57038     57038     shaanxi        108.4500       34.2833          103       154     2012      08        03        216              0.106750      31.791077       0.000000       0.163529       0.210000   -9999.000000   -9999.000000   -9999.000000
57038     57038     shaanxi        108.4500       34.2833          103       154     2012      08        04        217              0.105042      33.262512       0.000000       0.160372       0.181000   -9999.000000   -9999.000000       0.576000
57038     57038     shaanxi        108.4500       34.2833          103       154     2012      08        05        218              0.103500      33.475983       3.176216       0.158543       0.219000   -9999.000000       0.111400   -9999.000000
57038     57038     shaanxi        108.4500       34.2833          103       154     2012      08        06        219              0.103792      30.931305       4.772910       0.189821       0.206000   -9999.000000       0.113800       0.651000
57038     57038     shaanxi        108.4500       34.2833          103       154     2012      08        07        220              0.103500      30.749817       0.000000       0.183706   -9999.000000   -9999.000000       0.101700   -9999.000000
57038     57038     shaanxi        108.4500       34.2833          103       154     2012      08        08        221              0.101208      33.304413       0.327467       0.167172       0.222000   -9999.000000       0.114000   -9999.000000
57038     57038     shaanxi        108.4500       34.2833          103       154     2012      08        09        222              0.099417      33.424683       0.246328       0.162884       0.208000   -9999.000000   -9999.000000       0.645000
57038     57038     shaanxi        108.4500       34.2833          103       154     2012      08        10        223              0.098000      33.099976       0.000000       0.161075       0.199000       0.060000   -9999.000000   -9999.000000
57038     57038     shaanxi        108.4500       34.2833          103       154     2012      08        11        224              0.097167      33.090363       0.000000       0.158192       0.196000   -9999.000000       0.067900       0.574000
57038     57038     shaanxi        108.4500       34.2833          103       154     2012      08        12        225              0.096042      34.509338       4.113584       0.156621       0.203000   -9999.000000       0.129400   -9999.000000
57038     57038     shaanxi        108.4500       34.2833          103       154     2012      08        13        226              0.114458      33.842682       5.007980       0.162802       0.295000       0.129400       0.115600       0.866000
57038     57038     shaanxi        108.4500       34.2833          103       154     2012      08        14        227              0.127625      26.666107       1.874513       0.230170       0.297000   -9999.000000       0.107300       0.835000
57038     57038     shaanxi        108.4500       34.2833          103       154     2012      08        15        228              0.130750      26.250122       0.508794       0.226759       0.229500   -9999.000000   -9999.000000   -9999.000000
57038     57038     shaanxi        108.4500       34.2833          103       154     2012      08        16        229              0.131958      27.720642       0.000000       0.205383       0.255000   -9999.000000       0.096800       0.599000
57038     57038     shaanxi        108.4500       34.2833          103       154     2012      08        17        230              0.128458      30.210968       5.602784       0.185555       0.223000   -9999.000000       0.120100   -9999.000000
57038     57038     shaanxi        108.4500       34.2833          103       154     2012      08        18        231              0.147583      29.115356       1.302949       0.199065   -9999.000000   -9999.000000       0.109100       0.880000
57038     57038     shaanxi        108.4500       34.2833          103       154     2012      08        19        232              0.241167      25.106567      17.893456       0.245961       0.293000   -9999.000000       0.126400       0.950000
57038     57038     shaanxi        108.4500       34.2833          103       154     2012      08        20        233              0.244875      23.634705       0.610100       0.315431       0.281000   -9999.000000   -9999.000000       0.821000
57038     57038     shaanxi        108.4500       34.2833          103       154     2012      08        21        234              0.235458      24.282806       0.000000       0.278111       0.228000   -9999.000000   -9999.000000       0.888000
57038     57038     shaanxi        108.4500       34.2833          103       154     2012      08        22        235              0.209417      26.107544       0.000000       0.252329       0.198000   -9999.000000       0.091900   -9999.000000
57038     57038     shaanxi        108.4500       34.2833          103       154     2012      08        23        236              0.176375      26.212006       0.000000       0.227460   -9999.000000       0.279400       0.124300       0.597000
57038     57038     shaanxi        108.4500       34.2833          103       154     2012      08        24        237              0.154833      26.503510       0.000000       0.207601   -9999.000000   -9999.000000       0.110200   -9999.000000
57038     57038     shaanxi        108.4500       34.2833          103       154     2012      08        25        238              0.000000      27.532959       2.090721       0.191852       0.167000   -9999.000000       0.116600   -9999.000000
57038     57038     shaanxi        108.4500       34.2833          103       154     2012      08        26        239              0.139917      28.303162       0.000000       0.194519       0.214000       0.227800   -9999.000000       0.596000
57038     57038     shaanxi        108.4500       34.2833          103       154     2012      08        27        240              0.139958      27.677521       2.945898       0.197558       0.207000   -9999.000000       0.161100   -9999.000000
57038     57038     shaanxi        108.4500       34.2833          103       154     2012      08        28        241              0.141333      27.964417       0.000000       0.200903       0.189000       0.071800       0.097900       0.669000
57038     57038     shaanxi        108.4500       34.2833          103       154     2012      08        29        242              0.132833      28.576233       0.000000       0.200732       0.216000   -9999.000000       0.137100   -9999.000000
57038     57038     shaanxi        108.4500       34.2833          103       154     2012      08        30        243              0.143875      30.382141      19.047371       0.179202   -9999.000000   -9999.000000       0.127900       0.680000
57038     57038     shaanxi        108.4500       34.2833          103       154     2012      08        31        244              0.272333      29.978607      47.729286       0.215745       0.310000       0.171000       0.153500       0.876000
57038     57038     shaanxi        108.4500       34.2833          103       154     2012      09        01        245              0.267917      23.470917      20.229111       0.376597       0.255000   -9999.000000   -9999.000000   -9999.000000
57038     57038     shaanxi        108.4500       34.2833          103       154     2012      09        02        246              0.252292      21.283722       8.033731       0.368802       0.213000       0.173500       0.156600       0.773000
57038     57038     shaanxi        108.4500       34.2833          103       154     2012      09        03        247              0.238917      23.617737       3.026145       0.332724   -9999.000000   -9999.000000       0.140800   -9999.000000
57038     57038     shaanxi        108.4500       34.2833          103       154     2012      09        04        248              0.218250      24.760681       0.000000       0.315196       0.222000       0.120300       0.124600       0.819000
57038     57038     shaanxi        108.4500       34.2833          103       154     2012      09        05        249              0.192917      25.242188       0.000000       0.301823       0.191500   -9999.000000       0.128300   -9999.000000
57038     57038     shaanxi        108.4500       34.2833          103       154     2012      09        06        250              0.168458      26.538361       0.000000       0.290599       0.194500   -9999.000000   -9999.000000   -9999.000000
57038     57038     shaanxi        108.4500       34.2833          103       154     2012      09        07        251              0.223083      26.037842      36.603348       0.280261       0.218000   -9999.000000   -9999.000000       1.000000
57038     57038     shaanxi        108.4500       34.2833          103       154     2012      09        08        252              0.270542      23.773773       5.488533       0.342197       0.273000   -9999.000000       0.098300   -9999.000000
57038     57038     shaanxi        108.4500       34.2833          103       154     2012      09        09        253              0.260250      23.133881       0.818897       0.356712       0.241000       0.178300       0.145600       0.950000
57038     57038     shaanxi        108.4500       34.2833          103       154     2012      09        10        254              0.274500      24.335571      17.897709       0.333973       0.314000   -9999.000000       0.185300   -9999.000000
57038     57038     shaanxi        108.4500       34.2833          103       154     2012      09        11        255              0.265667      21.566681       0.000000       0.365344       0.188000   -9999.000000       0.168500       0.971000
57038     57038     shaanxi        108.4500       34.2833          103       154     2012      09        12        256              0.255125      23.224243       0.000000       0.340247       0.202000   -9999.000000   -9999.000000       0.739000
57038     57038     shaanxi        108.4500       34.2833          103       154     2012      09        13        257              0.241875      20.548706       0.000000       0.328818       0.163000   -9999.000000       0.159900   -9999.000000
57038     57038     shaanxi        108.4500       34.2833          103       154     2012      09        14        258              0.221750      20.598846       0.000000       0.319261   -9999.000000   -9999.000000       0.120800       0.714000
57038     57038     shaanxi        108.4500       34.2833          103       154     2012      09        15        259              0.206417      21.442383       2.801601       0.311763       0.223000       0.101800       0.174800   -9999.000000
57038     57038     shaanxi        108.4500       34.2833          103       154     2012      09        16        260              0.217417      21.050140       0.299778       0.315312       0.193000   -9999.000000       0.160500       0.809000
57038     57038     shaanxi        108.4500       34.2833          103       154     2012      09        17        261              0.207375      19.766418       0.000000       0.313177       0.180000   -9999.000000       0.138900       0.695000
57038     57038     shaanxi        108.4500       34.2833          103       154     2012      09        18        262              0.186417      21.875427       0.000000       0.305246       0.163000   -9999.000000   -9999.000000       0.760000
57038     57038     shaanxi        108.4500       34.2833          103       154     2012      09        19        263              0.165500      22.977814       0.000000       0.297860       0.146000   -9999.000000       0.131100       0.689000
57038     57038     shaanxi        108.4500       34.2833          103       154     2012      09        20        264              0.188875      23.688263       3.424420       0.291128       0.240000   -9999.000000       0.160500   -9999.000000
57038     57038     shaanxi        108.4500       34.2833          103       154     2012      09        21        265              0.221333      21.499054       0.000000       0.302999   -9999.000000   -9999.000000       0.133600       0.745000
57038     57038     shaanxi        108.4500       34.2833          103       154     2012      09        22        266              0.210792      22.690979       0.000000       0.298195       0.135500   -9999.000000       0.146500       0.742000
57038     57038     shaanxi        108.4500       34.2833          103       154     2012      09        23        267              0.199708      22.498260       0.000000       0.293095       0.140500   -9999.000000   -9999.000000       0.750000
57038     57038     shaanxi        108.4500       34.2833          103       154     2012      09        24        268              0.182667      23.020172       1.624359       0.288961       0.135000   -9999.000000   -9999.000000       0.616000
57038     57038     shaanxi        108.4500       34.2833          103       154     2012      09        25        269              0.241042      23.352234       6.396950       0.287087       0.183000   -9999.000000       0.135500   -9999.000000
57038     57038     shaanxi        108.4500       34.2833          103       154     2012      09        26        270              0.248000      20.245148       0.000000       0.319374       0.172000   -9999.000000       0.207300       0.750000
57038     57038     shaanxi        108.4500       34.2833          103       154     2012      09        27        271              0.242214      20.994354       0.000000       0.303066       0.132500       0.198900       0.179900   -9999.000000
57038     57038     shaanxi        108.4500       34.2833          103       154     2012      09        28        272              0.210800      21.084595       0.000000       0.294663       0.133500   -9999.000000       0.181700       0.697000
57038     57038     shaanxi        108.4500       34.2833          103       154     2012      09        29        273              0.194833      19.050507       0.000000       0.286082       0.131000   -9999.000000   -9999.000000       0.495000
57038     57038     shaanxi        108.4500       34.2833          103       154     2012      09        30        274              0.173833      19.825500       0.000000       0.281329   -9999.000000   -9999.000000       0.176900   -9999.000000
57038     57038     shaanxi        108.4500       34.2833          103       154     2012      10        01        275              0.158292      20.266846       0.000000       0.276453       0.120000   -9999.000000       0.130700       0.608000
57038     57038     shaanxi        108.4500       34.2833          103       154     2012      10        02        276              0.194542      20.816650       7.208776       0.271903       0.142000   -9999.000000       0.168700   -9999.000000
57038     57038     shaanxi        108.4500       34.2833          103       154     2012      10        03        277              0.231000      18.596558       0.000000       0.303116       0.114000       0.202700       0.165200       0.734000
57038     57038     shaanxi        108.4500       34.2833          103       154     2012      10        04        278              0.218417      21.249390       4.471616       0.296144       0.140000   -9999.000000   -9999.000000   -9999.000000
57038     57038     shaanxi        108.4500       34.2833          103       154     2012      10        05        279              0.201750      19.356476       0.000000       0.289029       0.129000   -9999.000000   -9999.000000   -9999.000000
57038     57038     shaanxi        108.4500       34.2833          103       154     2012      10        06        280              0.184542      20.576965       0.711284       0.283575       0.129000       0.219900       0.125800       0.689000
57038     57038     shaanxi        108.4500       34.2833          103       154     2012      10        07        281              0.180000      18.721588       0.264452       0.280443       0.134000   -9999.000000       0.152100   -9999.000000
57038     57038     shaanxi        108.4500       34.2833          103       154     2012      10        08        282              0.198750      18.181305       2.053473       0.280386       0.149000       0.134100       0.138000       0.929000
57038     57038     shaanxi        108.4500       34.2833          103       154     2012      10        09        283              0.210458      17.555511       0.000000       0.290771       0.122500   -9999.000000       0.132400   -9999.000000
57038     57038     shaanxi        108.4500       34.2833          103       154     2012      10        10        284              0.193542      18.950714       0.000000       0.282085       0.124000   -9999.000000   -9999.000000       0.687000
57038     57038     shaanxi        108.4500       34.2833          103       154     2012      10        11        285              0.184458      19.117279       0.000000       0.275857   -9999.000000   -9999.000000       0.126200       0.693000
57038     57038     shaanxi        108.4500       34.2833          103       154     2012      10        12        286              0.178875      17.658051       0.824747       0.275461       0.096000   -9999.000000       0.067200   -9999.000000
57038     57038     shaanxi        108.4500       34.2833          103       154     2012      10        13        287              0.165667      18.671539       0.265162       0.274697       0.084000   -9999.000000       0.123900       0.601000
57038     57038     shaanxi        108.4500       34.2833          103       154     2012      10        14        288              0.153333      19.967499       0.000000       0.270058       0.095500   -9999.000000       0.115600   -9999.000000
57038     57038     shaanxi        108.4500       34.2833          103       154     2012      10        15        289              0.148458      18.662933       2.616253       0.267378       0.108000   -9999.000000       0.154700       0.475000
57038     57038     shaanxi        108.4500       34.2833          103       154     2012      10        16        290              0.153083      17.049011       1.050895       0.275198       0.107000   -9999.000000   -9999.000000       0.635000
57038     57038     shaanxi        108.4500       34.2833          103       154     2012      10        17        291              0.142667      15.716919       0.000000       0.277963       0.103000   -9999.000000       0.146800       0.645000
57038     57038     shaanxi        108.4500       34.2833          103       154     2012      10        18        292              0.139250      15.315704       0.000000       0.268984       0.110000   -9999.000000       0.157000       0.492000
57038     57038     shaanxi        108.4500       34.2833          103       154     2012      10        19        293              0.137833      13.612762       0.000000       0.268523       0.096000   -9999.000000       0.137900   -9999.000000
57038     57038     shaanxi        108.4500       34.2833          103       154     2012      10        20        294              0.135458      16.121979       0.000000       0.266124       0.100500   -9999.000000       0.154700       0.490000
57038     57038     shaanxi        108.4500       34.2833          103       154     2012      10        21        295              0.134792      17.458038       0.202601       0.262934   -9999.000000   -9999.000000   -9999.000000       0.607000
57038     57038     shaanxi        108.4500       34.2833          103       154     2012      10        22        296              0.131250      13.828064       0.000000       0.265036   -9999.000000   -9999.000000   -9999.000000       0.661000
57038     57038     shaanxi        108.4500       34.2833          103       154     2012      10        23        297              0.132583      14.427856       0.780314       0.260562   -9999.000000   -9999.000000       0.111200       0.622000
57038     57038     shaanxi        108.4500       34.2833          103       154     2012      10        24        298              0.134625      11.306427       0.000000       0.267959   -9999.000000   -9999.000000       0.138600   -9999.000000
57038     57038     shaanxi        108.4500       34.2833          103       154     2012      10        25        299              0.000000      14.618835       0.000000       0.263501       0.120500   -9999.000000       0.126300       0.477000
57038     57038     shaanxi        108.4500       34.2833          103       154     2012      10        26        300              0.128375      15.299622       0.000000       0.259693       0.124000   -9999.000000       0.136600   -9999.000000
57038     57038     shaanxi        108.4500       34.2833          103       154     2012      10        27        301              0.125583      16.542816       0.000000       0.256565   -9999.000000   -9999.000000   -9999.000000       0.520000
57038     57038     shaanxi        108.4500       34.2833          103       154     2012      10        28        302              0.000000      15.592804       0.424476       0.254408       0.137000   -9999.000000       0.155000       0.410000
57038     57038     shaanxi        108.4500       34.2833          103       154     2012      10        29        303              0.132208      14.720612       0.460285       0.254438       0.110000   -9999.000000       0.076500   -9999.000000
57038     57038     shaanxi        108.4500       34.2833          103       154     2012      10        30        304              0.128333      14.919647       0.495435       0.260153       0.103000   -9999.000000       0.121000       0.442000
57038     57038     shaanxi        108.4500       34.2833          103       154     2012      10        31        305              0.123125      13.529419       0.000000       0.254097       0.120000   -9999.000000       0.124800   -9999.000000
57038     57038     shaanxi        108.4500       34.2833          103       154     2012      11        01        306              0.120000      13.176727       0.000000       0.250011       0.117000   -9999.000000       0.122500       0.499000
57038     57038     shaanxi        108.4500       34.2833          103       154     2012      11        02        307              0.118500      12.152985       0.000000       0.248598       0.135000   -9999.000000   -9999.000000   -9999.000000
57038     57038     shaanxi        108.4500       34.2833          103       154     2012      11        03        308              0.114000      13.341156       0.000000       0.246081   -9999.000000   -9999.000000       0.110700   -9999.000000
57038     57038     shaanxi        108.4500       34.2833          103       154     2012      11        04        309              0.110208       9.755859       0.000000       0.241848       0.104000   -9999.000000       0.122500       0.413000
57038     57038     shaanxi        108.4500       34.2833          103       154     2012      11        05        310              0.108417       8.769348       0.000000       0.240186       0.121000   -9999.000000       0.089400   -9999.000000
57038     57038     shaanxi        108.4500       34.2833          103       154     2012      11        06        311              0.108500       8.488678       0.529560       0.239226       0.122000   -9999.000000       0.100600       0.461000
57038     57038     shaanxi        108.4500       34.2833          103       154     2012      11        07        312              0.116417       9.671875       0.718719       0.238853   -9999.000000   -9999.000000   -9999.000000   -9999.000000
57038     57038     shaanxi        108.4500       34.2833          103       154     2012      11        08        313              0.120000       8.368134       0.000000       0.245286       0.139000       0.141800   -9999.000000       0.553000
57038     57038     shaanxi        108.4500       34.2833          103       154     2012      11        09        314              0.120792      10.132568       1.095356       0.243532       0.144000   -9999.000000       0.069400       0.492000
57038     57038     shaanxi        108.4500       34.2833          103       154     2012      11        10        315              0.121208       9.551727       0.000000       0.244665       0.122000   -9999.000000       0.101700   -9999.000000
57038     57038     shaanxi        108.4500       34.2833          103       154     2012      11        11        316              0.118583       7.363556       0.000000       0.243702       0.134000   -9999.000000       0.092500       0.285000
57038     57038     shaanxi        108.4500       34.2833          103       154     2012      11        12        317              0.117208       7.450897       0.000000       0.240913       0.136000   -9999.000000       0.090500   -9999.000000
57038     57038     shaanxi        108.4500       34.2833          103       154     2012      11        13        318              0.000000       8.549103       0.000000       0.240074   -9999.000000       0.063000   -9999.000000       0.404000
57038     57038     shaanxi        108.4500       34.2833          103       154     2012      11        14        319              0.114250       8.624542       0.000000       0.238328       0.139000   -9999.000000       0.092400       0.425000
57038     57038     shaanxi        108.4500       34.2833          103       154     2012      11        15        320              0.115625       7.945526       0.177485       0.237978   -9999.000000   -9999.000000       0.072800       0.439000
57038     57038     shaanxi        108.4500       34.2833          103       154     2012      11        16        321              0.117667       6.378784       0.000000       0.241246       0.141000       0.105800       0.089800       0.313000
57038     57038     shaanxi        108.4500       34.2833          103       154     2012      11        17        322              0.000000       8.254547       0.000000       0.240243       0.133000   -9999.000000       0.092800   -9999.000000
57038     57038     shaanxi        108.4500       34.2833          103       154     2012      11        18        323              0.115125       8.278442       0.000000       0.238641   -9999.000000   -9999.000000   -9999.000000       0.298000
57038     57038     shaanxi        108.4500       34.2833          103       154     2012      11        19        324              0.114125       9.169312       0.079351       0.237584       0.147000   -9999.000000   -9999.000000       0.430000
57038     57038     shaanxi        108.4500       34.2833          103       154     2012      11        20        325              0.114000       7.979828       0.082573       0.237468       0.130500   -9999.000000       0.074100       0.449000
57038     57038     shaanxi        108.4500       34.2833          103       154     2012      11        21        326              0.114333       7.210541       0.000000       0.239392       0.129500       0.182900       0.079300       0.268000
57038     57038     shaanxi        108.4500       34.2833          103       154     2012      11        22        327              0.112083       9.174347       0.000000       0.239066       0.136000   -9999.000000       0.072900   -9999.000000
57038     57038     shaanxi        108.4500       34.2833          103       154     2012      11        23        328              0.108917       7.507874       0.000000       0.237008   -9999.000000   -9999.000000       0.080000       0.255000
57038     57038     shaanxi        108.4500       34.2833          103       154     2012      11        24        329              0.110042       6.665802       1.183896       0.234517   -9999.000000   -9999.000000   -9999.000000   -9999.000000
57038     57038     shaanxi        108.4500       34.2833          103       154     2012      11        25        330              0.150792       5.038849       0.282059       0.238216   -9999.000000   -9999.000000       0.086000       0.564000
57038     57038     shaanxi        108.4500       34.2833          103       154     2012      11        26        331              0.150292       4.793030       0.000000       0.250607       0.130000   -9999.000000   -9999.000000       0.358000
57038     57038     shaanxi        108.4500       34.2833          103       154     2012      11        27        332              0.145167       4.985046       0.000000       0.243987       0.133000   -9999.000000       0.067400   -9999.000000
57038     57038     shaanxi        108.4500       34.2833          103       154     2012      11        28        333              0.139625       5.630829       0.000000       0.243165   -9999.000000   -9999.000000       0.065900       0.245000
57038     57038     shaanxi        108.4500       34.2833          103       154     2012      11        29        334              0.134917       3.441284       0.000000       0.236894   -9999.000000   -9999.000000       0.070700   -9999.000000
57038     57038     shaanxi        108.4500       34.2833          103       154     2012      11        30        335              0.132958       2.082550       0.000000       0.228038   -9999.000000   -9999.000000   -9999.000000       0.339000
57038     57038     shaanxi        108.4500       34.2833          103       154     2012      12        01        336              0.132792       2.566864       0.000000       0.235115       0.126000   -9999.000000       0.073000   -9999.000000
57038     57038     shaanxi        108.4500       34.2833          103       154     2012      12        02        337              0.130792       3.227814       0.074058       0.239380   -9999.000000   -9999.000000       0.057100   -9999.000000
57038     57038     shaanxi        108.4500       34.2833          103       154     2012      12        03        338              0.127500       2.505432       0.000000       0.238778       0.137000   -9999.000000       0.065600       0.248000
57038     57038     shaanxi        108.4500       34.2833          103       154     2012      12        04        339              0.124917       4.158844       0.000000       0.235980   -9999.000000   -9999.000000       0.078400   -9999.000000
57038     57038     shaanxi        108.4500       34.2833          103       154     2012      12        05        340              0.122333       4.971008       0.000000       0.237699   -9999.000000   -9999.000000   -9999.000000       0.225000
57038     57038     shaanxi        108.4500       34.2833          103       154     2012      12        06        341              0.120167       4.715576       0.000000       0.234044       0.119000   -9999.000000   -9999.000000   -9999.000000
57038     57038     shaanxi        108.4500       34.2833          103       154     2012      12        07        342              0.118083       5.057770       0.000000       0.235173       0.113000   -9999.000000       0.043900       0.372000
57038     57038     shaanxi        108.4500       34.2833          103       154     2012      12        08        343              0.115333       5.162048       0.000000       0.233842       0.126000   -9999.000000       0.073100       0.284000
57038     57038     shaanxi        108.4500       34.2833          103       154     2012      12        09        344              0.113833       2.951782       0.000000       0.224375   -9999.000000       0.159600       0.067500   -9999.000000
57038     57038     shaanxi        108.4500       34.2833          103       154     2012      12        10        345              0.112667       2.122253       0.000000       0.221272   -9999.000000   -9999.000000       0.059800       0.187000
57038     57038     shaanxi        108.4500       34.2833          103       154     2012      12        11        346              0.111042       2.691742       0.000000       0.222233   -9999.000000   -9999.000000   -9999.000000   -9999.000000
57038     57038     shaanxi        108.4500       34.2833          103       154     2012      12        12        347              0.110833       1.110687       0.000000       0.213924   -9999.000000   -9999.000000       0.060500       0.155000
57038     57038     shaanxi        108.4500       34.2833          103       154     2012      12        13        348              0.111000       0.958282       0.000000       0.213582   -9999.000000   -9999.000000       0.022200       0.345000
57038     57038     shaanxi        108.4500       34.2833          103       154     2012      12        14        349              0.111500       0.511719       0.000000       0.215507       0.118000   -9999.000000       0.060700       0.354000
57038     57038     shaanxi        108.4500       34.2833          103       154     2012      12        15        350              0.000000       1.735901       0.000000       0.224301   -9999.000000   -9999.000000       0.066000       0.237000
57038     57038     shaanxi        108.4500       34.2833          103       154     2012      12        16        351              0.111833       1.240417       0.000000       0.225526       0.145000   -9999.000000       0.062400   -9999.000000
57038     57038     shaanxi        108.4500       34.2833          103       154     2012      12        17        352              0.111667       1.948364       0.000000       0.231704       0.111000   -9999.000000   -9999.000000       0.215000
57038     57038     shaanxi        108.4500       34.2833          103       154     2012      12        18        353              0.110167       2.332367       0.000000       0.231350       0.115000   -9999.000000       0.054500       0.242000
57038     57038     shaanxi        108.4500       34.2833          103       154     2012      12        19        354              0.109583       2.100983       0.000000       0.221636   -9999.000000   -9999.000000       0.067900       0.299000
57038     57038     shaanxi        108.4500       34.2833          103       154     2012      12        20        355              0.000000       1.630005       0.112140       0.224284   -9999.000000   -9999.000000       0.059600       0.313000
57038     57038     shaanxi        108.4500       34.2833          103       154     2012      12        21        356              0.111292       0.771729       0.172208       0.219869   -9999.000000   -9999.000000       0.065700   -9999.000000
57038     57038     shaanxi        108.4500       34.2833          103       154     2012      12        22        357              0.110625       1.619171       0.000000       0.222847   -9999.000000       0.239700   -9999.000000       0.176000
57038     57038     shaanxi        108.4500       34.2833          103       154     2012      12        23        358              0.107333       0.571716       0.000000       0.211204   -9999.000000   -9999.000000   -9999.000000   -9999.000000
57038     57038     shaanxi        108.4500       34.2833          103       154     2012      12        24        359              0.103889      -1.988586       0.000000       0.184989   -9999.000000   -9999.000000       0.010900       0.101000
57038     57038     shaanxi        108.4500       34.2833          103       154     2012      12        25        360              0.104167      -1.535034       0.000000       0.187807   -9999.000000   -9999.000000       0.057200       0.074000
57038     57038     shaanxi        108.4500       34.2833          103       154     2012      12        26        361              0.000000      -0.800629       0.000000       0.192816   -9999.000000   -9999.000000       0.051000   -9999.000000
57038     57038     shaanxi        108.4500       34.2833          103       154     2012      12        27        362              0.103583      -1.586090       0.000000       0.187655   -9999.000000   -9999.000000       0.058000       0.035000
57038     57038     shaanxi        108.4500       34.2833          103       154     2012      12        28        363              0.000000      -1.331757       0.000000       0.188804   -9999.000000   -9999.000000   -9999.000000   -9999.000000
57038     57038     shaanxi        108.4500       34.2833          103       154     2012      12        29        364              0.000000      -0.534973       0.190736       0.196392   -9999.000000   -9999.000000       0.054300       0.130000
57038     57038     shaanxi        108.4500       34.2833          103       154     2012      12        30        365              0.000000      -2.276855       0.000000       0.183069       0.100000   -9999.000000       0.033600   -9999.000000
57038     57038     shaanxi        108.4500       34.2833          103       154     2012      12        31        366              0.090600      -1.317169       0.000000       0.188231   -9999.000000   -9999.000000       0.050800   -9999.000000
