# Supplementary material for: Research on Fusing Multisatellite Soil Moisture Data Based on Bayesian Model Averaging
Source: Hindawi journal article supplement (doi:10.1155/2018/9310838), 2018-06-25
Supplement: f1 [file 9310838.f1.zip › 2012_sm00-10cm_daily_ZDB_ZHY_57043_366days_allin.txt]

57043     57043     shaanxi        109.9667       34.8000          101       160     2012      01        01        001              0.000000   -9999.000000       0.544205   -9999.000000       0.090000   -9999.000000       0.068400   -9999.000000
57043     57043     shaanxi        109.9667       34.8000          101       160     2012      01        02        002              0.194833       0.597504       0.000000       0.169560       0.098000   -9999.000000   -9999.000000       0.275000
57043     57043     shaanxi        109.9667       34.8000          101       160     2012      01        03        003              0.000000       1.390625       0.051510       0.170515   -9999.000000   -9999.000000       0.071700   -9999.000000
57043     57043     shaanxi        109.9667       34.8000          101       160     2012      01        04        004              0.170043      -0.469849       0.000000       0.167609   -9999.000000   -9999.000000       0.056600       0.012000
57043     57043     shaanxi        109.9667       34.8000          101       160     2012      01        05        005              0.154500      -1.138336       0.000000       0.165379   -9999.000000   -9999.000000       0.072600       0.084000
57043     57043     shaanxi        109.9667       34.8000          101       160     2012      01        06        006              0.158583      -1.791473       0.000000       0.164160       0.080000   -9999.000000       0.079700       0.188000
57043     57043     shaanxi        109.9667       34.8000          101       160     2012      01        07        007              0.172083      -0.215271       0.000000       0.166163   -9999.000000   -9999.000000       0.082600       0.111000
57043     57043     shaanxi        109.9667       34.8000          101       160     2012      01        08        008              0.000000      -0.546814       0.000000       0.166708       0.096000   -9999.000000   -9999.000000   -9999.000000
57043     57043     shaanxi        109.9667       34.8000          101       160     2012      01        09        009              0.166250       0.255829       0.000000       0.167532   -9999.000000   -9999.000000   -9999.000000       0.084000
57043     57043     shaanxi        109.9667       34.8000          101       160     2012      01        10        010              0.170375       1.010773       0.000000       0.168148   -9999.000000   -9999.000000       0.050900       0.212000
57043     57043     shaanxi        109.9667       34.8000          101       160     2012      01        11        011              0.169167       0.562592      41.212273       0.167089       0.084000   -9999.000000       0.057100       0.211000
57043     57043     shaanxi        109.9667       34.8000          101       160     2012      01        12        012              0.166000       0.850922       0.290238       0.166488   -9999.000000   -9999.000000       0.062600       0.031000
57043     57043     shaanxi        109.9667       34.8000          101       160     2012      01        13        013              0.169583       0.572174       0.000000       0.166726       0.103000   -9999.000000       0.059500   -9999.000000
57043     57043     shaanxi        109.9667       34.8000          101       160     2012      01        14        014              0.176833       1.487396       0.000000       0.167217   -9999.000000   -9999.000000   -9999.000000       0.015000
57043     57043     shaanxi        109.9667       34.8000          101       160     2012      01        15        015              0.168208       1.009888       0.000000       0.167199   -9999.000000   -9999.000000       0.052800       0.201000
57043     57043     shaanxi        109.9667       34.8000          101       160     2012      01        16        016              0.168542       1.376099       0.058322       0.167278   -9999.000000   -9999.000000       0.057200       0.154000
57043     57043     shaanxi        109.9667       34.8000          101       160     2012      01        17        017              0.000000       0.598724       0.341368       0.168531   -9999.000000   -9999.000000       0.054500       0.062000
57043     57043     shaanxi        109.9667       34.8000          101       160     2012      01        18        018              0.176667       0.354370       0.000000       0.170606   -9999.000000   -9999.000000       0.051900   -9999.000000
57043     57043     shaanxi        109.9667       34.8000          101       160     2012      01        19        019              0.176833       0.367157       0.158586       0.174280   -9999.000000   -9999.000000   -9999.000000       0.127000
57043     57043     shaanxi        109.9667       34.8000          101       160     2012      01        20        020              0.180750       1.007812       0.074693       0.176018   -9999.000000   -9999.000000       0.053500   -9999.000000
57043     57043     shaanxi        109.9667       34.8000          101       160     2012      01        21        021              0.180333       0.647552       1.615243       0.177560   -9999.000000   -9999.000000       0.036400       0.197000
57043     57043     shaanxi        109.9667       34.8000          101       160     2012      01        22        022              0.175875      -1.366180       0.210379       0.176276   -9999.000000       0.167700       0.047700       0.027000
57043     57043     shaanxi        109.9667       34.8000          101       160     2012      01        23        023              0.155375      -2.043304       0.000000       0.175142   -9999.000000   -9999.000000       0.057200   -9999.000000
57043     57043     shaanxi        109.9667       34.8000          101       160     2012      01        24        024              0.144375      -2.612793       2.085736       0.173034   -9999.000000   -9999.000000   -9999.000000       0.032000
57043     57043     shaanxi        109.9667       34.8000          101       160     2012      01        25        025              0.132042      -2.641907       0.000000       0.171595   -9999.000000   -9999.000000   -9999.000000   -9999.000000
57043     57043     shaanxi        109.9667       34.8000          101       160     2012      01        26        026              0.131833      -1.435730       0.000000       0.171733   -9999.000000   -9999.000000       0.061300       0.099000
57043     57043     shaanxi        109.9667       34.8000          101       160     2012      01        27        027              0.142500      -0.363770       0.273345       0.172399       0.106000   -9999.000000       0.055000   -9999.000000
57043     57043     shaanxi        109.9667       34.8000          101       160     2012      01        28        028              0.162625       1.179810       0.000000       0.175090       0.119000   -9999.000000       0.065700   -9999.000000
57043     57043     shaanxi        109.9667       34.8000          101       160     2012      01        29        029              0.172292       2.086487       0.000000       0.176494   -9999.000000   -9999.000000       0.072400       0.299000
57043     57043     shaanxi        109.9667       34.8000          101       160     2012      01        30        030              0.174292       2.067841       0.000000       0.174899   -9999.000000   -9999.000000       0.078700   -9999.000000
57043     57043     shaanxi        109.9667       34.8000          101       160     2012      01        31        031              0.172458       2.046600       0.000000       0.173491   -9999.000000   -9999.000000   -9999.000000       0.225000
57043     57043     shaanxi        109.9667       34.8000          101       160     2012      02        01        032              0.169583       3.663910       0.000000       0.172367       0.093000   -9999.000000       0.050700   -9999.000000
57043     57043     shaanxi        109.9667       34.8000          101       160     2012      02        02        033              0.161583       2.164490       0.000000       0.169952       0.074000   -9999.000000       0.057600       0.028000
57043     57043     shaanxi        109.9667       34.8000          101       160     2012      02        03        034              0.159125       0.902283       0.000000       0.167109       0.105000   -9999.000000       0.067700       0.179000
57043     57043     shaanxi        109.9667       34.8000          101       160     2012      02        04        035              0.160250       2.277618       0.000000       0.166469   -9999.000000   -9999.000000       0.068900       0.202000
57043     57043     shaanxi        109.9667       34.8000          101       160     2012      02        05        036              0.161917       1.182404       0.000000       0.166681   -9999.000000   -9999.000000   -9999.000000       0.179000
57043     57043     shaanxi        109.9667       34.8000          101       160     2012      02        06        037              0.158792       3.160278       0.000000       0.167363   -9999.000000   -9999.000000       0.054700   -9999.000000
57043     57043     shaanxi        109.9667       34.8000          101       160     2012      02        07        038              0.147542       1.875824       0.000000       0.165403   -9999.000000   -9999.000000       0.033800       0.078000
57043     57043     shaanxi        109.9667       34.8000          101       160     2012      02        08        039              0.145625      -0.068787       0.000000       0.162916       0.103000   -9999.000000       0.065000       0.051000
57043     57043     shaanxi        109.9667       34.8000          101       160     2012      02        09        040              0.149167      -0.295135       0.000000       0.162067   -9999.000000   -9999.000000       0.065100       0.310000
57043     57043     shaanxi        109.9667       34.8000          101       160     2012      02        10        041              0.151625       0.513824       0.000000       0.163123   -9999.000000   -9999.000000       0.058400       0.045000
57043     57043     shaanxi        109.9667       34.8000          101       160     2012      02        11        042              0.151625       1.937744       0.000000       0.162694       0.093000   -9999.000000   -9999.000000   -9999.000000
57043     57043     shaanxi        109.9667       34.8000          101       160     2012      02        12        043              0.155458       4.154083       0.000000       0.162694   -9999.000000   -9999.000000   -9999.000000       0.090000
57043     57043     shaanxi        109.9667       34.8000          101       160     2012      02        13        044              0.153917       3.508667       0.000000       0.163254   -9999.000000   -9999.000000   -9999.000000       0.224000
57043     57043     shaanxi        109.9667       34.8000          101       160     2012      02        14        045              0.153583       4.056152       0.000000       0.163676       0.099000   -9999.000000   -9999.000000       0.191000
57043     57043     shaanxi        109.9667       34.8000          101       160     2012      02        15        046              0.153625       5.397858       0.000000       0.163869   -9999.000000   -9999.000000       0.061700       0.066000
57043     57043     shaanxi        109.9667       34.8000          101       160     2012      02        16        047              0.151958       5.138092       0.000000       0.164201   -9999.000000   -9999.000000   -9999.000000   -9999.000000
57043     57043     shaanxi        109.9667       34.8000          101       160     2012      02        17        048              0.150083       4.067017       0.000000       0.163261       0.084000   -9999.000000   -9999.000000       0.053000
57043     57043     shaanxi        109.9667       34.8000          101       160     2012      02        18        049              0.148583       2.754974       0.699041       0.162213       0.097000   -9999.000000       0.042200   -9999.000000
57043     57043     shaanxi        109.9667       34.8000          101       160     2012      02        19        050              0.148125       2.780304       0.000000       0.169866       0.095000   -9999.000000       0.063000       0.195000
57043     57043     shaanxi        109.9667       34.8000          101       160     2012      02        20        051              0.148333       4.469025       0.076816       0.170167   -9999.000000   -9999.000000       0.059300       0.082000
57043     57043     shaanxi        109.9667       34.8000          101       160     2012      02        21        052              0.147417       6.217438       0.000000       0.167592   -9999.000000   -9999.000000   -9999.000000   -9999.000000
57043     57043     shaanxi        109.9667       34.8000          101       160     2012      02        22        053              0.148083       5.248688       0.239803       0.166855       0.075000   -9999.000000   -9999.000000       0.194000
57043     57043     shaanxi        109.9667       34.8000          101       160     2012      02        23        054              0.146875       7.516571       0.211913       0.166724       0.098000   -9999.000000       0.057500   -9999.000000
57043     57043     shaanxi        109.9667       34.8000          101       160     2012      02        24        055              0.146625       4.151245       0.000000       0.167948       0.094000   -9999.000000       0.043800       0.250000
57043     57043     shaanxi        109.9667       34.8000          101       160     2012      02        25        056              0.145458       5.031708       0.857697       0.167491   -9999.000000       0.148200       0.063100   -9999.000000
57043     57043     shaanxi        109.9667       34.8000          101       160     2012      02        26        057              0.145500       3.097931       0.096588       0.166963   -9999.000000   -9999.000000       0.056800   -9999.000000
57043     57043     shaanxi        109.9667       34.8000          101       160     2012      02        27        058              0.144667       4.564545       2.374507       0.168189       0.087000   -9999.000000   -9999.000000       0.185000
57043     57043     shaanxi        109.9667       34.8000          101       160     2012      02        28        059              0.144708       5.099579       0.021032       0.168375   -9999.000000       0.104300   -9999.000000   -9999.000000
57043     57043     shaanxi        109.9667       34.8000          101       160     2012      02        29        060              0.000000   -9999.000000       0.000000   -9999.000000       0.094000   -9999.000000   -9999.000000   -9999.000000
57043     57043     shaanxi        109.9667       34.8000          101       160     2012      03        01        061              0.145250       5.700134       0.303052       0.167836       0.132000   -9999.000000       0.064200   -9999.000000
57043     57043     shaanxi        109.9667       34.8000          101       160     2012      03        02        062              0.145167       5.473419       0.330470       0.170681   -9999.000000   -9999.000000       0.053400       0.299000
57043     57043     shaanxi        109.9667       34.8000          101       160     2012      03        03        063              0.143208       6.175995       0.256564       0.173144   -9999.000000   -9999.000000       0.056600       0.290000
57043     57043     shaanxi        109.9667       34.8000          101       160     2012      03        04        064              0.141958       5.891327       0.613644       0.174075       0.113000   -9999.000000   -9999.000000   -9999.000000
57043     57043     shaanxi        109.9667       34.8000          101       160     2012      03        05        065              0.141125       5.618256       0.061333       0.180319       0.107000   -9999.000000   -9999.000000       0.261000
57043     57043     shaanxi        109.9667       34.8000          101       160     2012      03        06        066              0.138750       7.076477       0.328559       0.177171       0.104000   -9999.000000       0.036900   -9999.000000
57043     57043     shaanxi        109.9667       34.8000          101       160     2012      03        07        067              0.000000       5.648346       0.472587       0.174385       0.123000   -9999.000000       0.063400       0.215000
57043     57043     shaanxi        109.9667       34.8000          101       160     2012      03        08        068              0.136500       8.300903       0.158865       0.174673   -9999.000000   -9999.000000       0.052900       0.334000
57043     57043     shaanxi        109.9667       34.8000          101       160     2012      03        09        069              0.134833       8.163788       0.293803       0.173053       0.098000       0.161200       0.050900       0.358000
57043     57043     shaanxi        109.9667       34.8000          101       160     2012      03        10        070              0.132708       8.826233       7.693876       0.169762       0.110500   -9999.000000   -9999.000000       0.184000
57043     57043     shaanxi        109.9667       34.8000          101       160     2012      03        11        071              0.128750      11.289520       0.186028       0.166855       0.097000   -9999.000000       0.053300   -9999.000000
57043     57043     shaanxi        109.9667       34.8000          101       160     2012      03        12        072              0.126417       9.367981       0.951049       0.163827   -9999.000000   -9999.000000       0.037800       0.057000
57043     57043     shaanxi        109.9667       34.8000          101       160     2012      03        13        073              0.126083       8.422455       0.000000       0.163460       0.111000   -9999.000000       0.057700       0.410000
57043     57043     shaanxi        109.9667       34.8000          101       160     2012      03        14        074              0.124500      12.926544       0.181311       0.162425       0.096500       0.136300   -9999.000000       0.406000
57043     57043     shaanxi        109.9667       34.8000          101       160     2012      03        15        075              0.127375      13.268982       0.034592       0.161811       0.124000   -9999.000000       0.065600       0.197000
57043     57043     shaanxi        109.9667       34.8000          101       160     2012      03        16        076              0.129250       8.519806       2.557017       0.163964       0.104000   -9999.000000   -9999.000000   -9999.000000
57043     57043     shaanxi        109.9667       34.8000          101       160     2012      03        17        077              0.128375      12.851593       0.000000       0.163911   -9999.000000   -9999.000000       0.053600       0.186000
57043     57043     shaanxi        109.9667       34.8000          101       160     2012      03        18        078              0.124333      15.752106       0.413491       0.162069       0.115000   -9999.000000       0.050400   -9999.000000
57043     57043     shaanxi        109.9667       34.8000          101       160     2012      03        19        079              0.119667      14.562042       0.371069       0.160600       0.107000   -9999.000000       0.072300       0.295000
57043     57043     shaanxi        109.9667       34.8000          101       160     2012      03        20        080              0.118375       9.187927       0.000000       0.161944       0.107000   -9999.000000       0.072500       0.067000
57043     57043     shaanxi        109.9667       34.8000          101       160     2012      03        21        081              0.154500      10.245483       0.682093       0.162470       0.211000   -9999.000000   -9999.000000   -9999.000000
57043     57043     shaanxi        109.9667       34.8000          101       160     2012      03        22        082              0.176167       5.418762       8.666038       0.173885       0.183000       0.260200   -9999.000000       0.724000
57043     57043     shaanxi        109.9667       34.8000          101       160     2012      03        23        083              0.167125       8.538086       0.000000       0.176587   -9999.000000   -9999.000000       0.061000   -9999.000000
57043     57043     shaanxi        109.9667       34.8000          101       160     2012      03        24        084              0.156458      11.167236       0.000000       0.170050   -9999.000000   -9999.000000       0.061900       0.359000
57043     57043     shaanxi        109.9667       34.8000          101       160     2012      03        25        085              0.000000      14.566193       0.000000       0.163577       0.131500   -9999.000000       0.075100   -9999.000000
57043     57043     shaanxi        109.9667       34.8000          101       160     2012      03        26        086              0.142417      15.741791       0.000000       0.160945       0.135500   -9999.000000       0.067500   -9999.000000
57043     57043     shaanxi        109.9667       34.8000          101       160     2012      03        27        087              0.136583      17.050995       0.225069       0.159777       0.122000   -9999.000000   -9999.000000       0.350000
57043     57043     shaanxi        109.9667       34.8000          101       160     2012      03        28        088              0.138333      19.079803       0.186529       0.159552       0.212000   -9999.000000       0.093000   -9999.000000
57043     57043     shaanxi        109.9667       34.8000          101       160     2012      03        29        089              0.145417      15.278015       0.000000       0.163261       0.179000       0.123900       0.074300       0.397000
57043     57043     shaanxi        109.9667       34.8000          101       160     2012      03        30        090              0.135708      17.945190       0.000000       0.163571       0.113000       0.081200       0.081700   -9999.000000
57043     57043     shaanxi        109.9667       34.8000          101       160     2012      03        31        091              0.126542      15.272797       0.251590       0.160298       0.133500   -9999.000000       0.070200       0.155000
57043     57043     shaanxi        109.9667       34.8000          101       160     2012      04        01        092              0.119000      17.599701       0.233286       0.158838       0.156000   -9999.000000       0.070100       0.322000
57043     57043     shaanxi        109.9667       34.8000          101       160     2012      04        02        093              0.111917      19.894257       0.390201       0.160065   -9999.000000   -9999.000000   -9999.000000       0.282000
57043     57043     shaanxi        109.9667       34.8000          101       160     2012      04        03        094              0.104750      15.663574       0.184521       0.159667       0.177000   -9999.000000       0.071800       0.223000
57043     57043     shaanxi        109.9667       34.8000          101       160     2012      04        04        095              0.098375      17.557098       0.000000       0.157525       0.142500       0.145700       0.067600   -9999.000000
57043     57043     shaanxi        109.9667       34.8000          101       160     2012      04        05        096              0.092292      19.764374       2.669115       0.156641       0.147500   -9999.000000       0.071400       0.257000
57043     57043     shaanxi        109.9667       34.8000          101       160     2012      04        06        097              0.088833      20.207367       1.232395       0.155801       0.136000   -9999.000000       0.071200       0.351000
57043     57043     shaanxi        109.9667       34.8000          101       160     2012      04        07        098              0.086167      20.821228       0.000000       0.155539       0.153000   -9999.000000   -9999.000000       0.332000
57043     57043     shaanxi        109.9667       34.8000          101       160     2012      04        08        099              0.084375      21.676819       0.000000       0.155700       0.165000   -9999.000000   -9999.000000       0.200000
57043     57043     shaanxi        109.9667       34.8000          101       160     2012      04        09        100              0.082042      23.985382       0.000000       0.155332       0.164000   -9999.000000       0.066800   -9999.000000
57043     57043     shaanxi        109.9667       34.8000          101       160     2012      04        10        101              0.081667      20.322327       0.000000       0.156765       0.146500   -9999.000000       0.087900       0.187000
57043     57043     shaanxi        109.9667       34.8000          101       160     2012      04        11        102              0.080583      21.757263       4.801670       0.157415       0.171000   -9999.000000       0.083900       0.393000
57043     57043     shaanxi        109.9667       34.8000          101       160     2012      04        12        103              0.078167      20.808746       0.347158       0.178863       0.206000   -9999.000000       0.083200       0.527000
57043     57043     shaanxi        109.9667       34.8000          101       160     2012      04        13        104              0.078833      14.399414       0.340647       0.222685       0.208000   -9999.000000   -9999.000000       0.146000
57043     57043     shaanxi        109.9667       34.8000          101       160     2012      04        14        105              0.078500      18.553162       0.000000       0.194378       0.221000   -9999.000000       0.089100   -9999.000000
57043     57043     shaanxi        109.9667       34.8000          101       160     2012      04        15        106              0.077917      20.210388       0.000000       0.178310       0.165500   -9999.000000       0.072800       0.178000
57043     57043     shaanxi        109.9667       34.8000          101       160     2012      04        16        107              0.077826      22.178009       0.000000       0.170282       0.170500   -9999.000000       0.093700   -9999.000000
57043     57043     shaanxi        109.9667       34.8000          101       160     2012      04        17        108              0.076917      23.388123       0.411264       0.166001       0.175000   -9999.000000       0.083200       0.369000
57043     57043     shaanxi        109.9667       34.8000          101       160     2012      04        18        109              0.076583      20.650970       0.000000       0.165392   -9999.000000   -9999.000000   -9999.000000       0.174000
57043     57043     shaanxi        109.9667       34.8000          101       160     2012      04        19        110              0.076333      23.188843       0.942014       0.163266       0.236000   -9999.000000   -9999.000000   -9999.000000
57043     57043     shaanxi        109.9667       34.8000          101       160     2012      04        20        111              0.076542      23.011749       0.600502       0.169068       0.166000   -9999.000000       0.078300       0.206000
57043     57043     shaanxi        109.9667       34.8000          101       160     2012      04        21        112              0.075875      21.604553       0.000000       0.175757       0.167500   -9999.000000       0.082200   -9999.000000
57043     57043     shaanxi        109.9667       34.8000          101       160     2012      04        22        113              0.076250      24.575897       0.000000       0.166361       0.154000       0.108100   -9999.000000       0.338000
57043     57043     shaanxi        109.9667       34.8000          101       160     2012      04        23        114              0.086500      27.699707       0.281738       0.160864   -9999.000000   -9999.000000       0.087500   -9999.000000
57043     57043     shaanxi        109.9667       34.8000          101       160     2012      04        24        115              0.165083      26.308716       0.398901       0.163066       0.269000   -9999.000000   -9999.000000   -9999.000000
57043     57043     shaanxi        109.9667       34.8000          101       160     2012      04        25        116              0.000000      19.747559       0.298724       0.164668       0.176500   -9999.000000       0.109800       0.313000
57043     57043     shaanxi        109.9667       34.8000          101       160     2012      04        26        117              0.121417      21.398804       0.000000       0.163814       0.163000       0.126700       0.075000   -9999.000000
57043     57043     shaanxi        109.9667       34.8000          101       160     2012      04        27        118              0.106750      24.733856       0.000000       0.158723       0.144000   -9999.000000       0.085900       0.381000
57043     57043     shaanxi        109.9667       34.8000          101       160     2012      04        28        119              0.096125      27.421753       0.670581       0.156677       0.140000   -9999.000000       0.092800   -9999.000000
57043     57043     shaanxi        109.9667       34.8000          101       160     2012      04        29        120              0.088625      28.220245       0.000000       0.159888       0.197000   -9999.000000       0.092700       0.177000
57043     57043     shaanxi        109.9667       34.8000          101       160     2012      04        30        121              0.083542      27.467651       0.578516       0.159893       0.252000   -9999.000000   -9999.000000       0.361000
57043     57043     shaanxi        109.9667       34.8000          101       160     2012      05        01        122              0.085375      22.615601       0.502265       0.163324       0.209000   -9999.000000       0.122800       0.584000
57043     57043     shaanxi        109.9667       34.8000          101       160     2012      05        02        123              0.086292      20.105042       0.910322       0.169580       0.173000       0.157600       0.100600       0.396000
57043     57043     shaanxi        109.9667       34.8000          101       160     2012      05        03        124              0.084875      24.848572      14.615610       0.163894       0.158000   -9999.000000       0.101800   -9999.000000
57043     57043     shaanxi        109.9667       34.8000          101       160     2012      05        04        125              0.082750      26.060944       0.000000       0.159715       0.191000   -9999.000000       0.096700       0.235000
57043     57043     shaanxi        109.9667       34.8000          101       160     2012      05        05        126              0.080167      28.005646       0.000000       0.156892       0.186000   -9999.000000       0.100000       0.388000
57043     57043     shaanxi        109.9667       34.8000          101       160     2012      05        06        127              0.078917      29.432404       0.061699       0.155758       0.159500   -9999.000000   -9999.000000       0.395000
57043     57043     shaanxi        109.9667       34.8000          101       160     2012      05        07        128              0.079292      30.393494       0.000000       0.154927   -9999.000000   -9999.000000       0.090600       0.320000
57043     57043     shaanxi        109.9667       34.8000          101       160     2012      05        08        129              0.079167      28.677612       0.000000       0.155813       0.139000   -9999.000000       0.100400   -9999.000000
57043     57043     shaanxi        109.9667       34.8000          101       160     2012      05        09        130              0.076500      31.819641       0.000000       0.155043   -9999.000000       0.171200       0.102800       0.293000
57043     57043     shaanxi        109.9667       34.8000          101       160     2012      05        10        131              0.074292      30.400635       0.000000       0.154907       0.187000   -9999.000000       0.091800       0.430000
57043     57043     shaanxi        109.9667       34.8000          101       160     2012      05        11        132              0.073167      31.199860       3.641845       0.153839       0.196000   -9999.000000   -9999.000000       0.614000
57043     57043     shaanxi        109.9667       34.8000          101       160     2012      05        12        133              0.074375      22.830475       0.000000       0.192108       0.168000   -9999.000000       0.116800       0.190000
57043     57043     shaanxi        109.9667       34.8000          101       160     2012      05        13        134              0.072292      22.186920       0.121664       0.187365       0.139000   -9999.000000       0.082100   -9999.000000
57043     57043     shaanxi        109.9667       34.8000          101       160     2012      05        14        135              0.070917      22.696075       0.000000       0.171767   -9999.000000   -9999.000000       0.118200       0.346000
57043     57043     shaanxi        109.9667       34.8000          101       160     2012      05        15        136              0.067708      25.076019       0.000000       0.164037       0.181000       0.118100       0.101200   -9999.000000
57043     57043     shaanxi        109.9667       34.8000          101       160     2012      05        16        137              0.064750      26.561493       0.000000       0.159395       0.141000   -9999.000000       0.101500       0.418000
57043     57043     shaanxi        109.9667       34.8000          101       160     2012      05        17        138              0.063042      27.445374       0.000000       0.157471       0.132000   -9999.000000   -9999.000000       0.258000
57043     57043     shaanxi        109.9667       34.8000          101       160     2012      05        18        139              0.065750      28.619202       4.648630       0.156311       0.126000   -9999.000000       0.106100   -9999.000000
57043     57043     shaanxi        109.9667       34.8000          101       160     2012      05        19        140              0.068667      26.964172       0.000000       0.156971       0.125000   -9999.000000       0.098900       0.412000
57043     57043     shaanxi        109.9667       34.8000          101       160     2012      05        20        141              0.063042      31.597565       0.000000       0.155849   -9999.000000   -9999.000000       0.113600   -9999.000000
57043     57043     shaanxi        109.9667       34.8000          101       160     2012      05        21        142              0.073292      31.119293       3.870228       0.154924       0.224000   -9999.000000       0.131300       0.681000
57043     57043     shaanxi        109.9667       34.8000          101       160     2012      05        22        143              0.130500      22.119690       0.570747       0.181485       0.154500   -9999.000000   -9999.000000   -9999.000000
57043     57043     shaanxi        109.9667       34.8000          101       160     2012      05        23        144              0.119750      21.562744       0.454636       0.212661   -9999.000000   -9999.000000   -9999.000000   -9999.000000
57043     57043     shaanxi        109.9667       34.8000          101       160     2012      05        24        145              0.109000      22.135071       0.246081       0.195608       0.146000   -9999.000000       0.086800       0.398000
57043     57043     shaanxi        109.9667       34.8000          101       160     2012      05        25        146              0.000000      21.293121       1.747000       0.185164       0.170000   -9999.000000       0.111500   -9999.000000
57043     57043     shaanxi        109.9667       34.8000          101       160     2012      05        26        147              0.097958      25.056274       0.000000       0.172743       0.154000   -9999.000000       0.104800       0.442000
57043     57043     shaanxi        109.9667       34.8000          101       160     2012      05        27        148              0.086708      29.678101       0.000000       0.164073       0.123000   -9999.000000       0.096400   -9999.000000
57043     57043     shaanxi        109.9667       34.8000          101       160     2012      05        28        149              0.121250      31.851990      15.762850       0.160486   -9999.000000   -9999.000000   -9999.000000       0.302000
57043     57043     shaanxi        109.9667       34.8000          101       160     2012      05        29        150              0.184833      26.084778       0.000000       0.221929       0.134000   -9999.000000       0.126300       0.567000
57043     57043     shaanxi        109.9667       34.8000          101       160     2012      05        30        151              0.144875      25.469482       0.000000       0.264808   -9999.000000   -9999.000000       0.090800   -9999.000000
57043     57043     shaanxi        109.9667       34.8000          101       160     2012      05        31        152              0.121250      27.896881       0.049672       0.222705       0.166000   -9999.000000       0.100300   -9999.000000
57043     57043     shaanxi        109.9667       34.8000          101       160     2012      06        01        153              0.110625      25.609497       0.198383       0.204110       0.080500   -9999.000000       0.105400   -9999.000000
57043     57043     shaanxi        109.9667       34.8000          101       160     2012      06        02        154              0.096833      29.239044       0.065853       0.187621       0.079500       0.307900       0.096300       0.333000
57043     57043     shaanxi        109.9667       34.8000          101       160     2012      06        03        155              0.086125      30.337433       0.000000       0.177599       0.077000   -9999.000000   -9999.000000       0.511000
57043     57043     shaanxi        109.9667       34.8000          101       160     2012      06        04        156              0.080125      29.352539       0.000000       0.174028       0.076000   -9999.000000       0.102200       0.502000
57043     57043     shaanxi        109.9667       34.8000          101       160     2012      06        05        157              0.074250      31.500854       2.185328       0.171006       0.113000   -9999.000000       0.110900       0.470000
57043     57043     shaanxi        109.9667       34.8000          101       160     2012      06        06        158              0.072917      26.644226       4.859010       0.191535       0.099000   -9999.000000       0.103200   -9999.000000
57043     57043     shaanxi        109.9667       34.8000          101       160     2012      06        07        159              0.069583      26.047882       0.000000       0.189507       0.087000   -9999.000000       0.094800       0.333000
57043     57043     shaanxi        109.9667       34.8000          101       160     2012      06        08        160              0.064667      30.905365       0.000000       0.172362       0.077000   -9999.000000   -9999.000000       0.471000
57043     57043     shaanxi        109.9667       34.8000          101       160     2012      06        09        161              0.059583      31.154877       0.000000       0.167519       0.071000   -9999.000000   -9999.000000       0.489000
57043     57043     shaanxi        109.9667       34.8000          101       160     2012      06        10        162              0.053333      33.712524       0.000000       0.164015       0.095000   -9999.000000       0.072600       0.284000
57043     57043     shaanxi        109.9667       34.8000          101       160     2012      06        11        163              0.000000      32.974518       1.157022       0.162131       0.082000   -9999.000000       0.125700   -9999.000000
57043     57043     shaanxi        109.9667       34.8000          101       160     2012      06        12        164              0.044167      32.024750       0.000000       0.161443       0.075000   -9999.000000       0.120500       0.397000
57043     57043     shaanxi        109.9667       34.8000          101       160     2012      06        13        165              0.041708      33.591095       0.000000       0.159457       0.080500   -9999.000000       0.121300   -9999.000000
57043     57043     shaanxi        109.9667       34.8000          101       160     2012      06        14        166              0.037833      35.456146       3.273829       0.158251       0.074000   -9999.000000   -9999.000000       0.462000
57043     57043     shaanxi        109.9667       34.8000          101       160     2012      06        15        167              0.035708      31.875824       0.000000       0.157880   -9999.000000   -9999.000000       0.126300       0.337000
57043     57043     shaanxi        109.9667       34.8000          101       160     2012      06        16        168              0.034167      32.531799       0.000000       0.157284       0.086000   -9999.000000       0.103500   -9999.000000
57043     57043     shaanxi        109.9667       34.8000          101       160     2012      06        17        169              0.033542      33.580597       0.000000       0.156570       0.080500   -9999.000000       0.119400       0.423000
57043     57043     shaanxi        109.9667       34.8000          101       160     2012      06        18        170              0.033708      35.207764       0.562328       0.156677       0.077000   -9999.000000       0.119100   -9999.000000
57043     57043     shaanxi        109.9667       34.8000          101       160     2012      06        19        171              0.046167      34.183472       1.817220       0.159694   -9999.000000   -9999.000000       0.146200       0.578000
57043     57043     shaanxi        109.9667       34.8000          101       160     2012      06        20        172              0.077542      26.127777       0.000000       0.183979   -9999.000000   -9999.000000   -9999.000000   -9999.000000
57043     57043     shaanxi        109.9667       34.8000          101       160     2012      06        21        173              0.090000      32.772552       3.018453       0.167760       0.095000   -9999.000000       0.130800   -9999.000000
57043     57043     shaanxi        109.9667       34.8000          101       160     2012      06        22        174              0.087458      33.891785       0.000000       0.178829       0.086000   -9999.000000       0.119900       0.504000
57043     57043     shaanxi        109.9667       34.8000          101       160     2012      06        23        175              0.084375      34.536377       0.089556       0.171823       0.086500   -9999.000000       0.118500   -9999.000000
57043     57043     shaanxi        109.9667       34.8000          101       160     2012      06        24        176              0.081417      35.978760       0.813630       0.162653       0.088000   -9999.000000       0.125200       0.501000
57043     57043     shaanxi        109.9667       34.8000          101       160     2012      06        25        177              0.109625      34.807892       2.681194       0.162864       0.120000       0.168300   -9999.000000   -9999.000000
57043     57043     shaanxi        109.9667       34.8000          101       160     2012      06        26        178              0.104125      28.494904       3.857093       0.199645       0.108000   -9999.000000   -9999.000000       0.436000
57043     57043     shaanxi        109.9667       34.8000          101       160     2012      06        27        179              0.095917      29.793915       1.235661       0.178653       0.101000   -9999.000000       0.089000       0.572000
57043     57043     shaanxi        109.9667       34.8000          101       160     2012      06        28        180              0.073875      30.407471       0.621566       0.167356       0.094500   -9999.000000       0.136400       0.411000
57043     57043     shaanxi        109.9667       34.8000          101       160     2012      06        29        181              0.139875      30.025269       8.654743       0.164448       0.113000   -9999.000000       0.148600       0.915000
57043     57043     shaanxi        109.9667       34.8000          101       160     2012      06        30        182              0.122875      26.476105       1.731803       0.256963       0.100000       0.119800       0.114600   -9999.000000
57043     57043     shaanxi        109.9667       34.8000          101       160     2012      07        01        183              0.109792      30.956696       5.092166       0.216611   -9999.000000   -9999.000000   -9999.000000       0.508000
57043     57043     shaanxi        109.9667       34.8000          101       160     2012      07        02        184              0.170042      33.573151       5.998117       0.198864       0.131000   -9999.000000       0.143000       0.762000
57043     57043     shaanxi        109.9667       34.8000          101       160     2012      07        03        185              0.137125      26.827820       6.053827       0.274537       0.107500   -9999.000000       0.110300       0.676000
57043     57043     shaanxi        109.9667       34.8000          101       160     2012      07        04        186              0.204333      31.456879      14.527679       0.240681       0.149000   -9999.000000       0.166700       0.845000
57043     57043     shaanxi        109.9667       34.8000          101       160     2012      07        05        187              0.193125      26.641693       0.000000       0.322787       0.106000   -9999.000000       0.141300   -9999.000000
57043     57043     shaanxi        109.9667       34.8000          101       160     2012      07        06        188              0.197417      30.182312       2.424955       0.269969   -9999.000000   -9999.000000       0.138700       0.618000
57043     57043     shaanxi        109.9667       34.8000          101       160     2012      07        07        189              0.249792      30.696381       6.933732       0.245023   -9999.000000   -9999.000000   -9999.000000       0.751000
57043     57043     shaanxi        109.9667       34.8000          101       160     2012      07        08        190              0.247917      28.874115      12.795558       0.289368       0.157000   -9999.000000       0.154200       0.781000
57043     57043     shaanxi        109.9667       34.8000          101       160     2012      07        09        191              0.260792      27.436798       3.238024       0.314357       0.137500   -9999.000000       0.178400       0.887000
57043     57043     shaanxi        109.9667       34.8000          101       160     2012      07        10        192              0.226542      26.232666       0.000000       0.318446       0.101000   -9999.000000       0.152000   -9999.000000
57043     57043     shaanxi        109.9667       34.8000          101       160     2012      07        11        193              0.201542      31.349182       0.791806       0.281015       0.115000   -9999.000000       0.134200       0.611000
57043     57043     shaanxi        109.9667       34.8000          101       160     2012      07        12        194              0.178958      31.212769       0.000000       0.256703       0.145000   -9999.000000   -9999.000000   -9999.000000
57043     57043     shaanxi        109.9667       34.8000          101       160     2012      07        13        195              0.163042      32.693024       8.842667       0.230580       0.140500       0.242100   -9999.000000       0.744000
57043     57043     shaanxi        109.9667       34.8000          101       160     2012      07        14        196              0.154833      30.254242       0.000000       0.280109       0.133000   -9999.000000       0.116800   -9999.000000
57043     57043     shaanxi        109.9667       34.8000          101       160     2012      07        15        197              0.142708      29.528076       0.000000       0.262369       0.124000   -9999.000000       0.147400   -9999.000000
57043     57043     shaanxi        109.9667       34.8000          101       160     2012      07        16        198              0.131250      30.287384       0.000000       0.234431       0.108000   -9999.000000       0.144800       0.548000
57043     57043     shaanxi        109.9667       34.8000          101       160     2012      07        17        199              0.122417      30.619293       0.000000       0.213180       0.147000   -9999.000000       0.143600   -9999.000000
57043     57043     shaanxi        109.9667       34.8000          101       160     2012      07        18        200              0.116917      30.448090       0.000000       0.198563       0.132000       0.048300   -9999.000000       0.491000
57043     57043     shaanxi        109.9667       34.8000          101       160     2012      07        19        201              0.111042      32.269318       0.000000       0.188970       0.112500   -9999.000000       0.141900   -9999.000000
57043     57043     shaanxi        109.9667       34.8000          101       160     2012      07        20        202              0.107087      32.619843       0.096861       0.183464       0.127000   -9999.000000       0.134400   -9999.000000
57043     57043     shaanxi        109.9667       34.8000          101       160     2012      07        21        203              0.165087      34.040039      21.861179       0.180050       0.136000   -9999.000000       0.164200       0.821000
57043     57043     shaanxi        109.9667       34.8000          101       160     2012      07        22        204              0.165250      29.927124       2.863206       0.332870   -9999.000000   -9999.000000       0.158200   -9999.000000
57043     57043     shaanxi        109.9667       34.8000          101       160     2012      07        23        205              0.145208      30.190399       0.241848       0.280665       0.181000       0.182700   -9999.000000       0.678000
57043     57043     shaanxi        109.9667       34.8000          101       160     2012      07        24        206              0.135417      28.678528       0.000000       0.254712       0.147500   -9999.000000   -9999.000000   -9999.000000
57043     57043     shaanxi        109.9667       34.8000          101       160     2012      07        25        207              0.127375      30.895905       0.000000       0.233357       0.142000   -9999.000000       0.138400       0.573000
57043     57043     shaanxi        109.9667       34.8000          101       160     2012      07        26        208              0.120667      32.583344       0.079013       0.214022       0.125000   -9999.000000       0.166400       0.635000
57043     57043     shaanxi        109.9667       34.8000          101       160     2012      07        27        209              0.127167      35.706299       0.000000       0.195699       0.117000   -9999.000000       0.156000       0.482000
57043     57043     shaanxi        109.9667       34.8000          101       160     2012      07        28        210              0.129792      36.176300       0.000000       0.185177       0.169000   -9999.000000       0.145500       0.457000
57043     57043     shaanxi        109.9667       34.8000          101       160     2012      07        29        211              0.128792      37.846924       0.097058       0.179648       0.157000   -9999.000000   -9999.000000   -9999.000000
57043     57043     shaanxi        109.9667       34.8000          101       160     2012      07        30        212              0.125667      37.284851       5.661400       0.177493       0.106000   -9999.000000       0.155800       0.429000
57043     57043     shaanxi        109.9667       34.8000          101       160     2012      07        31        213              0.121583      33.114532       0.972546       0.213346       0.168500       0.080000       0.118000       0.546000
57043     57043     shaanxi        109.9667       34.8000          101       160     2012      08        01        214              0.121167      29.250885       0.648855       0.226068       0.159000   -9999.000000       0.154800       0.686000
57043     57043     shaanxi        109.9667       34.8000          101       160     2012      08        02        215              0.124292      28.799866       0.000000       0.207643   -9999.000000   -9999.000000       0.137400       0.497000
57043     57043     shaanxi        109.9667       34.8000          101       160     2012      08        03        216              0.125000      31.965454       0.000000       0.190656       0.187000   -9999.000000       0.132700   -9999.000000
57043     57043     shaanxi        109.9667       34.8000          101       160     2012      08        04        217              0.123708      33.929352       0.490535       0.178545       0.153000   -9999.000000   -9999.000000       0.411000
57043     57043     shaanxi        109.9667       34.8000          101       160     2012      08        05        218              0.133708      34.634491       1.512401       0.174084       0.159000       0.224700       0.141700       0.651000
57043     57043     shaanxi        109.9667       34.8000          101       160     2012      08        06        219              0.133833      31.397278       1.306891       0.190307       0.152000   -9999.000000       0.158400       0.481000
57043     57043     shaanxi        109.9667       34.8000          101       160     2012      08        07        220              0.134583      32.391602       0.000000       0.177098       0.139000   -9999.000000       0.145300       0.335000
57043     57043     shaanxi        109.9667       34.8000          101       160     2012      08        08        221              0.132958      35.568512       0.614663       0.168964       0.192000   -9999.000000       0.146100   -9999.000000
57043     57043     shaanxi        109.9667       34.8000          101       160     2012      08        09        222              0.128958      35.276123       0.644593       0.167810       0.179000   -9999.000000   -9999.000000       0.417000
57043     57043     shaanxi        109.9667       34.8000          101       160     2012      08        10        223              0.127667      32.322540       0.000000       0.168567       0.152000   -9999.000000   -9999.000000   -9999.000000
57043     57043     shaanxi        109.9667       34.8000          101       160     2012      08        11        224              0.125792      34.317719       0.000000       0.164364       0.173000   -9999.000000       0.115400       0.424000
57043     57043     shaanxi        109.9667       34.8000          101       160     2012      08        12        225              0.122208      35.203430       0.168607       0.163310       0.147000       0.179200       0.148600       0.369000
57043     57043     shaanxi        109.9667       34.8000          101       160     2012      08        13        226              0.119375      32.781311       0.000000       0.164460       0.191000       0.124100       0.142500   -9999.000000
57043     57043     shaanxi        109.9667       34.8000          101       160     2012      08        14        227              0.116375      28.929596       0.656425       0.164098       0.200000   -9999.000000       0.152800       0.412000
57043     57043     shaanxi        109.9667       34.8000          101       160     2012      08        15        228              0.118333      28.304657       0.000000       0.169937       0.155000   -9999.000000   -9999.000000   -9999.000000
57043     57043     shaanxi        109.9667       34.8000          101       160     2012      08        16        229              0.119917      30.864838       0.000000       0.165238       0.174500   -9999.000000       0.139800       0.355000
57043     57043     shaanxi        109.9667       34.8000          101       160     2012      08        17        230              0.119750      32.962708       4.174356       0.161114       0.143000       0.221000       0.151700   -9999.000000
57043     57043     shaanxi        109.9667       34.8000          101       160     2012      08        18        231              0.117250      33.152863       7.157099       0.177459   -9999.000000       0.201500       0.182800   -9999.000000
57043     57043     shaanxi        109.9667       34.8000          101       160     2012      08        19        232              0.150875      25.957520      11.935658       0.273338       0.257000   -9999.000000       0.165300       0.852000
57043     57043     shaanxi        109.9667       34.8000          101       160     2012      08        20        233              0.177250      24.457031       0.789198       0.306500       0.227000   -9999.000000       0.139800   -9999.000000
57043     57043     shaanxi        109.9667       34.8000          101       160     2012      08        21        234              0.173167      25.221649       0.369128       0.281186       0.175000   -9999.000000   -9999.000000       0.760000
57043     57043     shaanxi        109.9667       34.8000          101       160     2012      08        22        235              0.164292      26.820526       0.000000       0.249360       0.154000   -9999.000000       0.142300   -9999.000000
57043     57043     shaanxi        109.9667       34.8000          101       160     2012      08        23        236              0.158000      26.740631       0.000000       0.221203       0.149000       0.184900       0.139300       0.502000
57043     57043     shaanxi        109.9667       34.8000          101       160     2012      08        24        237              0.153792      26.852814       0.000000       0.200547   -9999.000000   -9999.000000       0.128600   -9999.000000
57043     57043     shaanxi        109.9667       34.8000          101       160     2012      08        25        238              0.000000      28.900970       1.492567       0.186953   -9999.000000   -9999.000000       0.140900   -9999.000000
57043     57043     shaanxi        109.9667       34.8000          101       160     2012      08        26        239              0.145833      29.149933       0.889895       0.184745       0.168000   -9999.000000   -9999.000000       0.414000
57043     57043     shaanxi        109.9667       34.8000          101       160     2012      08        27        240              0.143917      29.456970       0.000000       0.190860       0.170500   -9999.000000   -9999.000000   -9999.000000
57043     57043     shaanxi        109.9667       34.8000          101       160     2012      08        28        241              0.142000      30.687256       0.000000       0.177500       0.135000   -9999.000000       0.099500       0.422000
57043     57043     shaanxi        109.9667       34.8000          101       160     2012      08        29        242              0.140542      31.715881       0.000000       0.171773   -9999.000000   -9999.000000       0.145500       0.455000
57043     57043     shaanxi        109.9667       34.8000          101       160     2012      08        30        243              0.138333      33.426971       4.150203       0.168397   -9999.000000       0.032900       0.127200       0.416000
57043     57043     shaanxi        109.9667       34.8000          101       160     2012      08        31        244              0.187958      33.606262      14.552224       0.175293       0.247000       0.347500       0.173100       0.818000
57043     57043     shaanxi        109.9667       34.8000          101       160     2012      09        01        245              0.250833      24.299194      14.538399       0.306128       0.199000   -9999.000000   -9999.000000   -9999.000000
57043     57043     shaanxi        109.9667       34.8000          101       160     2012      09        02        246              0.229917      21.789368       4.743624       0.331578       0.162000   -9999.000000       0.170400       0.727000
57043     57043     shaanxi        109.9667       34.8000          101       160     2012      09        03        247              0.205833      24.210541       2.918971       0.293613       0.146000   -9999.000000       0.141700       0.515000
57043     57043     shaanxi        109.9667       34.8000          101       160     2012      09        04        248              0.191250      25.820404       0.000000       0.267415       0.186000       0.189800       0.151400       0.587000
57043     57043     shaanxi        109.9667       34.8000          101       160     2012      09        05        249              0.182792      26.459290       0.000000       0.245265       0.166000       0.236100       0.142700       0.418000
57043     57043     shaanxi        109.9667       34.8000          101       160     2012      09        06        250              0.174542      28.151733       1.078793       0.225633       0.151500   -9999.000000       0.126900   -9999.000000
57043     57043     shaanxi        109.9667       34.8000          101       160     2012      09        07        251              0.184333      26.122437       9.475898       0.220532       0.184500   -9999.000000   -9999.000000       0.651000
57043     57043     shaanxi        109.9667       34.8000          101       160     2012      09        08        252              0.218750      26.530670       0.752003       0.255315       0.189000   -9999.000000       0.151400   -9999.000000
57043     57043     shaanxi        109.9667       34.8000          101       160     2012      09        09        253              0.203125      24.971313       0.000000       0.275202   -9999.000000       0.033500       0.160400       0.556000
57043     57043     shaanxi        109.9667       34.8000          101       160     2012      09        10        254              0.247375      25.984833      27.283760       0.245237       0.240000       0.255300       0.188200       0.972000
57043     57043     shaanxi        109.9667       34.8000          101       160     2012      09        11        255              0.248292      21.733734       0.663784       0.347607       0.157500   -9999.000000       0.186900   -9999.000000
57043     57043     shaanxi        109.9667       34.8000          101       160     2012      09        12        256              0.222542      23.859558       0.092143       0.316445       0.170500       0.169600   -9999.000000       0.558000
57043     57043     shaanxi        109.9667       34.8000          101       160     2012      09        13        257              0.205500      20.517731       0.329018       0.295313       0.131000       0.094100   -9999.000000   -9999.000000
57043     57043     shaanxi        109.9667       34.8000          101       160     2012      09        14        258              0.194750      21.066589       0.000000       0.277757   -9999.000000   -9999.000000       0.114700       0.451000
57043     57043     shaanxi        109.9667       34.8000          101       160     2012      09        15        259              0.187292      22.345459       0.363469       0.263095       0.167000       0.159200       0.177300   -9999.000000
57043     57043     shaanxi        109.9667       34.8000          101       160     2012      09        16        260              0.179792      23.044281       0.454212       0.250070       0.150500   -9999.000000       0.169900   -9999.000000
57043     57043     shaanxi        109.9667       34.8000          101       160     2012      09        17        261              0.175375      22.517273       0.000000       0.243451       0.138000       0.074100       0.139000       0.478000
57043     57043     shaanxi        109.9667       34.8000          101       160     2012      09        18        262              0.172042      23.690338       0.000000       0.232981       0.123000   -9999.000000   -9999.000000   -9999.000000
57043     57043     shaanxi        109.9667       34.8000          101       160     2012      09        19        263              0.168917      24.586273       0.000000       0.220776       0.118000   -9999.000000       0.153200       0.464000
57043     57043     shaanxi        109.9667       34.8000          101       160     2012      09        20        264              0.163083      25.256622       1.218935       0.208792       0.192000   -9999.000000       0.153700   -9999.000000
57043     57043     shaanxi        109.9667       34.8000          101       160     2012      09        21        265              0.160958      22.957367       0.192747       0.213993   -9999.000000   -9999.000000       0.158800       0.659000
57043     57043     shaanxi        109.9667       34.8000          101       160     2012      09        22        266              0.160458      22.312195       0.000000       0.217311       0.124000       0.171300       0.155000       0.530000
57043     57043     shaanxi        109.9667       34.8000          101       160     2012      09        23        267              0.160083      23.013947       0.000000       0.209603       0.127500       0.077700       0.151600   -9999.000000
57043     57043     shaanxi        109.9667       34.8000          101       160     2012      09        24        268              0.158042      24.918030       0.000000       0.200338       0.116000   -9999.000000   -9999.000000       0.432000
57043     57043     shaanxi        109.9667       34.8000          101       160     2012      09        25        269              0.166625      25.293304       5.990004       0.191262   -9999.000000   -9999.000000       0.138100   -9999.000000
57043     57043     shaanxi        109.9667       34.8000          101       160     2012      09        26        270              0.188958      21.697754       0.462478       0.239667       0.163000   -9999.000000       0.170700       0.739000
57043     57043     shaanxi        109.9667       34.8000          101       160     2012      09        27        271              0.185071      20.934113       1.743712       0.246774       0.120500   -9999.000000       0.155200       0.502000
57043     57043     shaanxi        109.9667       34.8000          101       160     2012      09        28        272              0.171867      21.705688       0.000000       0.226815       0.120000   -9999.000000       0.140500       0.545000
57043     57043     shaanxi        109.9667       34.8000          101       160     2012      09        29        273              0.168958      19.186127       0.099295       0.209761       0.118000   -9999.000000   -9999.000000       0.354000
57043     57043     shaanxi        109.9667       34.8000          101       160     2012      09        30        274              0.165167      20.503754       0.000000       0.198642       0.110000   -9999.000000       0.144000   -9999.000000
57043     57043     shaanxi        109.9667       34.8000          101       160     2012      10        01        275              0.161542      21.269714       0.000000       0.189598       0.107000   -9999.000000       0.085000       0.358000
57043     57043     shaanxi        109.9667       34.8000          101       160     2012      10        02        276              0.157458      22.608398       0.425096       0.183214       0.108000   -9999.000000       0.124200       0.347000
57043     57043     shaanxi        109.9667       34.8000          101       160     2012      10        03        277              0.155375      22.301422       0.000000       0.181546       0.089500   -9999.000000       0.120300       0.481000
57043     57043     shaanxi        109.9667       34.8000          101       160     2012      10        04        278              0.151125      23.763702       0.433367       0.179321       0.098500   -9999.000000       0.113100       0.310000
57043     57043     shaanxi        109.9667       34.8000          101       160     2012      10        05        279              0.149250      22.429077       0.000000       0.179875       0.087000   -9999.000000   -9999.000000   -9999.000000
57043     57043     shaanxi        109.9667       34.8000          101       160     2012      10        06        280              0.146000      22.484314       0.000000       0.177327   -9999.000000       0.093900       0.122500       0.332000
57043     57043     shaanxi        109.9667       34.8000          101       160     2012      10        07        281              0.142625      21.735291       0.000000       0.174273       0.104000   -9999.000000       0.119200   -9999.000000
57043     57043     shaanxi        109.9667       34.8000          101       160     2012      10        08        282              0.140583      20.365631       0.767085       0.174077       0.111000       0.081800       0.126200       0.598000
57043     57043     shaanxi        109.9667       34.8000          101       160     2012      10        09        283              0.140542      20.060760       0.215574       0.182390       0.097000   -9999.000000       0.115200       0.222000
57043     57043     shaanxi        109.9667       34.8000          101       160     2012      10        10        284              0.139375      20.793640       0.000000       0.179239       0.088000       0.143500   -9999.000000   -9999.000000
57043     57043     shaanxi        109.9667       34.8000          101       160     2012      10        11        285              0.138833      21.329803       0.000000       0.172412   -9999.000000       0.069200   -9999.000000       0.310000
57043     57043     shaanxi        109.9667       34.8000          101       160     2012      10        12        286              0.136458      22.294495       0.000000       0.169689       0.095000   -9999.000000       0.069000   -9999.000000
57043     57043     shaanxi        109.9667       34.8000          101       160     2012      10        13        287              0.135417      20.798981       0.000000       0.170051       0.087500   -9999.000000       0.108300       0.296000
57043     57043     shaanxi        109.9667       34.8000          101       160     2012      10        14        288              0.133833      22.207489       0.000000       0.168738       0.089000   -9999.000000       0.111300   -9999.000000
57043     57043     shaanxi        109.9667       34.8000          101       160     2012      10        15        289              0.131417      21.212463       1.551464       0.167686       0.095000   -9999.000000       0.121500   -9999.000000
57043     57043     shaanxi        109.9667       34.8000          101       160     2012      10        16        290              0.128917      19.118317       0.177582       0.172528       0.107000       0.130800   -9999.000000       0.370000
57043     57043     shaanxi        109.9667       34.8000          101       160     2012      10        17        291              0.128333      16.124298       0.117026       0.189091       0.105000   -9999.000000       0.126300   -9999.000000
57043     57043     shaanxi        109.9667       34.8000          101       160     2012      10        18        292              0.127042      16.419678       0.304035       0.176606       0.115000   -9999.000000       0.098700       0.370000
57043     57043     shaanxi        109.9667       34.8000          101       160     2012      10        19        293              0.127708      14.826599       0.000000       0.172921       0.090500   -9999.000000       0.133200   -9999.000000
57043     57043     shaanxi        109.9667       34.8000          101       160     2012      10        20        294              0.127625      18.016754       0.000000       0.170592       0.101500   -9999.000000       0.123600       0.214000
57043     57043     shaanxi        109.9667       34.8000          101       160     2012      10        21        295              0.125833      19.887238       2.047960       0.168511       0.149000   -9999.000000       0.156800       0.638000
57043     57043     shaanxi        109.9667       34.8000          101       160     2012      10        22        296              0.125875      14.402924       0.272095       0.193782   -9999.000000   -9999.000000   -9999.000000       0.534000
57043     57043     shaanxi        109.9667       34.8000          101       160     2012      10        23        297              0.124667      14.573364       0.063859       0.193072   -9999.000000       0.044700       0.131200       0.440000
57043     57043     shaanxi        109.9667       34.8000          101       160     2012      10        24        298              0.126125      11.298462       0.077301       0.186876   -9999.000000   -9999.000000       0.147600   -9999.000000
57043     57043     shaanxi        109.9667       34.8000          101       160     2012      10        25        299              0.000000      14.988770       0.000000       0.181574       0.116000   -9999.000000       0.129400       0.286000
57043     57043     shaanxi        109.9667       34.8000          101       160     2012      10        26        300              0.127125      16.367462       0.000000       0.175952       0.112000       0.174400       0.125700       0.341000
57043     57043     shaanxi        109.9667       34.8000          101       160     2012      10        27        301              0.126500      16.446045       0.273359       0.172823       0.113000   -9999.000000   -9999.000000       0.370000
57043     57043     shaanxi        109.9667       34.8000          101       160     2012      10        28        302              0.000000      17.381134       0.310649       0.170022       0.147000   -9999.000000   -9999.000000       0.446000
57043     57043     shaanxi        109.9667       34.8000          101       160     2012      10        29        303              0.124792      16.818909       0.159149       0.170174   -9999.000000       0.105500       0.071800   -9999.000000
57043     57043     shaanxi        109.9667       34.8000          101       160     2012      10        30        304              0.123917      15.355194       0.346695       0.172186       0.093000   -9999.000000       0.133700       0.224000
57043     57043     shaanxi        109.9667       34.8000          101       160     2012      10        31        305              0.123083      13.947205       0.000000       0.169458       0.110000   -9999.000000       0.126300       0.260000
57043     57043     shaanxi        109.9667       34.8000          101       160     2012      11        01        306              0.121917      13.702789       0.073826       0.165953       0.112000   -9999.000000       0.122300       0.346000
57043     57043     shaanxi        109.9667       34.8000          101       160     2012      11        02        307              0.122125      13.164459       0.392248       0.165124   -9999.000000   -9999.000000   -9999.000000       0.237000
57043     57043     shaanxi        109.9667       34.8000          101       160     2012      11        03        308              0.119583      15.622711       1.554771       0.166380   -9999.000000       0.066500       0.131500   -9999.000000
57043     57043     shaanxi        109.9667       34.8000          101       160     2012      11        04        309              0.118042      10.044464       0.673536       0.166741       0.097000   -9999.000000       0.105400       0.146000
57043     57043     shaanxi        109.9667       34.8000          101       160     2012      11        05        310              0.117375       8.547333       0.000000       0.170733       0.118000   -9999.000000       0.124900   -9999.000000
57043     57043     shaanxi        109.9667       34.8000          101       160     2012      11        06        311              0.117208       8.947815       1.042842       0.167175       0.123000   -9999.000000       0.116500       0.307000
57043     57043     shaanxi        109.9667       34.8000          101       160     2012      11        07        312              0.116375      10.480621       0.490140       0.165298   -9999.000000   -9999.000000       0.117800       0.109000
57043     57043     shaanxi        109.9667       34.8000          101       160     2012      11        08        313              0.116583       9.239563       0.000000       0.169849       0.141000   -9999.000000   -9999.000000   -9999.000000
57043     57043     shaanxi        109.9667       34.8000          101       160     2012      11        09        314              0.115667      11.563995       0.083398       0.168446       0.150000   -9999.000000       0.126500       0.239000
57043     57043     shaanxi        109.9667       34.8000          101       160     2012      11        10        315              0.113750       9.867676       0.664631       0.168361       0.131000   -9999.000000       0.131200   -9999.000000
57043     57043     shaanxi        109.9667       34.8000          101       160     2012      11        11        316              0.113417       7.027252       0.000000       0.168886       0.136000   -9999.000000       0.124300       0.297000
57043     57043     shaanxi        109.9667       34.8000          101       160     2012      11        12        317              0.113875       7.579895       0.000000       0.166067       0.132000   -9999.000000       0.107800   -9999.000000
57043     57043     shaanxi        109.9667       34.8000          101       160     2012      11        13        318              0.000000       8.656067       0.000000       0.164632   -9999.000000   -9999.000000   -9999.000000   -9999.000000
57043     57043     shaanxi        109.9667       34.8000          101       160     2012      11        14        319              0.114417       9.366241       0.000000       0.163254       0.151000   -9999.000000   -9999.000000       0.268000
57043     57043     shaanxi        109.9667       34.8000          101       160     2012      11        15        320              0.113167       9.795624       0.385122       0.162676   -9999.000000       0.144300       0.073000   -9999.000000
57043     57043     shaanxi        109.9667       34.8000          101       160     2012      11        16        321              0.113042       6.909058       0.502190       0.165398       0.146000       0.064000       0.106300       0.342000
57043     57043     shaanxi        109.9667       34.8000          101       160     2012      11        17        322              0.000000       8.259003       0.326897       0.166377       0.134000   -9999.000000       0.108900   -9999.000000
57043     57043     shaanxi        109.9667       34.8000          101       160     2012      11        18        323              0.113875       8.877655       0.089975       0.165640   -9999.000000   -9999.000000       0.099000       0.207000
57043     57043     shaanxi        109.9667       34.8000          101       160     2012      11        19        324              0.114208       9.420471       0.149501       0.165533       0.172000   -9999.000000   -9999.000000       0.296000
57043     57043     shaanxi        109.9667       34.8000          101       160     2012      11        20        325              0.113833       9.515717       0.000000       0.165330       0.138000   -9999.000000       0.095100       0.253000
57043     57043     shaanxi        109.9667       34.8000          101       160     2012      11        21        326              0.113708       8.272308       0.155098       0.166021       0.130000       0.140800       0.088200       0.334000
57043     57043     shaanxi        109.9667       34.8000          101       160     2012      11        22        327              0.112750       9.901123       0.000000       0.165913       0.134000   -9999.000000       0.099200   -9999.000000
57043     57043     shaanxi        109.9667       34.8000          101       160     2012      11        23        328              0.111708       7.779022       0.000000       0.165031       0.129000   -9999.000000       0.094700       0.140000
57043     57043     shaanxi        109.9667       34.8000          101       160     2012      11        24        329              0.111125       6.726898       0.411735       0.163643       0.150000   -9999.000000   -9999.000000       0.304000
57043     57043     shaanxi        109.9667       34.8000          101       160     2012      11        25        330              0.110458       7.156708       0.273064       0.165352   -9999.000000   -9999.000000   -9999.000000       0.511000
57043     57043     shaanxi        109.9667       34.8000          101       160     2012      11        26        331              0.110458       5.574097       0.166525       0.174327       0.118000       0.088800   -9999.000000       0.201000
57043     57043     shaanxi        109.9667       34.8000          101       160     2012      11        27        332              0.110833       4.781708       0.000000       0.172410       0.133000   -9999.000000       0.081600   -9999.000000
57043     57043     shaanxi        109.9667       34.8000          101       160     2012      11        28        333              0.110292       5.632477       0.000000       0.169936   -9999.000000   -9999.000000       0.082400       0.109000
57043     57043     shaanxi        109.9667       34.8000          101       160     2012      11        29        334              0.108833       2.842194       0.000000       0.167550   -9999.000000       0.057000       0.080700       0.140000
57043     57043     shaanxi        109.9667       34.8000          101       160     2012      11        30        335              0.108042       1.879669       0.187582       0.166178   -9999.000000   -9999.000000   -9999.000000       0.213000
57043     57043     shaanxi        109.9667       34.8000          101       160     2012      12        01        336              0.109750       3.716492       0.756577       0.166774   -9999.000000   -9999.000000       0.093200       0.355000
57043     57043     shaanxi        109.9667       34.8000          101       160     2012      12        02        337              0.109708       1.759033       0.498845       0.174277   -9999.000000   -9999.000000       0.050900   -9999.000000
57043     57043     shaanxi        109.9667       34.8000          101       160     2012      12        03        338              0.110208       1.230774       0.096481       0.181749       0.138000   -9999.000000       0.087900       0.147000
57043     57043     shaanxi        109.9667       34.8000          101       160     2012      12        04        339              0.110417       3.496643       0.000000       0.180633       0.151000       0.134600       0.087000   -9999.000000
57043     57043     shaanxi        109.9667       34.8000          101       160     2012      12        05        340              0.111208       4.568024       0.970274       0.176918   -9999.000000   -9999.000000       0.083300       0.258000
57043     57043     shaanxi        109.9667       34.8000          101       160     2012      12        06        341              0.111375       4.143372       0.051810       0.172911       0.124000   -9999.000000   -9999.000000       0.077000
57043     57043     shaanxi        109.9667       34.8000          101       160     2012      12        07        342              0.111500       5.249481       0.000000       0.170368       0.116000       0.094500       0.081000   -9999.000000
57043     57043     shaanxi        109.9667       34.8000          101       160     2012      12        08        343              0.110000       5.384277       0.000000       0.167802       0.128000   -9999.000000       0.081900       0.079000
57043     57043     shaanxi        109.9667       34.8000          101       160     2012      12        09        344              0.108250       2.533966       0.000000       0.165932       0.130000       0.179500       0.086200   -9999.000000
57043     57043     shaanxi        109.9667       34.8000          101       160     2012      12        10        345              0.105792       2.126129       0.000000       0.164814   -9999.000000   -9999.000000       0.069100       0.169000
57043     57043     shaanxi        109.9667       34.8000          101       160     2012      12        11        346              0.102292       2.085205       0.052977       0.164500   -9999.000000   -9999.000000   -9999.000000   -9999.000000
57043     57043     shaanxi        109.9667       34.8000          101       160     2012      12        12        347              0.100625       1.041595       0.159534       0.164647   -9999.000000   -9999.000000   -9999.000000   -9999.000000
57043     57043     shaanxi        109.9667       34.8000          101       160     2012      12        13        348              0.105833       1.382843       0.000000       0.166166   -9999.000000   -9999.000000       0.028500       0.343000
57043     57043     shaanxi        109.9667       34.8000          101       160     2012      12        14        349              0.106542       0.581390       0.202294       0.168021       0.128000       0.070700       0.074500   -9999.000000
57043     57043     shaanxi        109.9667       34.8000          101       160     2012      12        15        350              0.000000       1.827179       0.000000       0.171547   -9999.000000   -9999.000000       0.087000       0.464000
57043     57043     shaanxi        109.9667       34.8000          101       160     2012      12        16        351              0.106833       0.858368       0.195905       0.172856   -9999.000000   -9999.000000       0.086200   -9999.000000
57043     57043     shaanxi        109.9667       34.8000          101       160     2012      12        17        352              0.106917       2.743591       0.219981       0.173789       0.104000   -9999.000000   -9999.000000       0.242000
57043     57043     shaanxi        109.9667       34.8000          101       160     2012      12        18        353              0.106125       2.365662       0.054597       0.177081       0.100000   -9999.000000       0.077500       0.182000
57043     57043     shaanxi        109.9667       34.8000          101       160     2012      12        19        354              0.106000       2.193695       0.000000       0.174061       0.121000   -9999.000000       0.059400   -9999.000000
57043     57043     shaanxi        109.9667       34.8000          101       160     2012      12        20        355              0.000000       1.743011       0.000000       0.172846   -9999.000000   -9999.000000       0.080400       0.319000
57043     57043     shaanxi        109.9667       34.8000          101       160     2012      12        21        356              0.105333      -0.564514       0.155936       0.172942   -9999.000000   -9999.000000       0.091700   -9999.000000
57043     57043     shaanxi        109.9667       34.8000          101       160     2012      12        22        357              0.103125       0.364166       0.000000       0.172717   -9999.000000       0.117100       0.082800       0.155000
57043     57043     shaanxi        109.9667       34.8000          101       160     2012      12        23        358              0.089333      -1.251770       0.000000       0.169804   -9999.000000   -9999.000000   -9999.000000       0.032000
57043     57043     shaanxi        109.9667       34.8000          101       160     2012      12        24        359              0.080611      -3.500824       0.000000       0.165230       0.099000   -9999.000000       0.057100       0.159000
57043     57043     shaanxi        109.9667       34.8000          101       160     2012      12        25        360              0.079917      -2.092224       0.000000       0.165296       0.101000   -9999.000000       0.076700       0.025000
57043     57043     shaanxi        109.9667       34.8000          101       160     2012      12        26        361              0.000000      -1.340607       0.000000       0.165566   -9999.000000   -9999.000000       0.072900   -9999.000000
57043     57043     shaanxi        109.9667       34.8000          101       160     2012      12        27        362              0.077300      -2.242950       0.000000       0.164907   -9999.000000       0.207600       0.069700       0.034000
57043     57043     shaanxi        109.9667       34.8000          101       160     2012      12        28        363              0.000000      -1.503662       0.000000       0.165261   -9999.000000   -9999.000000   -9999.000000       0.178000
57043     57043     shaanxi        109.9667       34.8000          101       160     2012      12        29        364              0.000000      -1.411407       0.000000       0.166720   -9999.000000   -9999.000000   -9999.000000       0.057000
57043     57043     shaanxi        109.9667       34.8000          101       160     2012      12        30        365              0.000000      -3.142090       0.310195       0.162943   -9999.000000   -9999.000000       0.016900   -9999.000000
57043     57043     shaanxi        109.9667       34.8000          101       160     2012      12        31        366              0.084533      -2.199738       0.000000       0.162077   -9999.000000   -9999.000000       0.069700   -9999.000000
