# Supplementary material for: Research on Fusing Multisatellite Soil Moisture Data Based on Bayesian Model Averaging
Source: Hindawi journal article supplement (doi:10.1155/2018/9310838), 2018-06-25
Supplement: f1 [file 9310838.f1.zip › 2012_sm00-10cm_daily_ZDB_ZHY_57045_366days_allin.txt]

57045     57045     shaanxi        109.4833       34.5167          102       158     2012      01        01        001              0.000000   -9999.000000       0.000000   -9999.000000   -9999.000000   -9999.000000       0.090800   -9999.000000
57045     57045     shaanxi        109.4833       34.5167          102       158     2012      01        02        002              0.315750       0.750732       0.000000       0.206320       0.099000   -9999.000000   -9999.000000       0.344000
57045     57045     shaanxi        109.4833       34.5167          102       158     2012      01        03        003              0.000000       2.448730       0.000000       0.216910   -9999.000000   -9999.000000       0.124100   -9999.000000
57045     57045     shaanxi        109.4833       34.5167          102       158     2012      01        04        004              0.304182       0.941895       0.000000       0.205934   -9999.000000   -9999.000000       0.064900       0.037000
57045     57045     shaanxi        109.4833       34.5167          102       158     2012      01        05        005              0.298167      -0.285675       0.000000       0.197118   -9999.000000   -9999.000000       0.122500       0.162000
57045     57045     shaanxi        109.4833       34.5167          102       158     2012      01        06        006              0.295458      -1.174438       0.000000       0.191065       0.088000   -9999.000000       0.115500       0.184000
57045     57045     shaanxi        109.4833       34.5167          102       158     2012      01        07        007              0.300042       0.360565       0.000000       0.200218   -9999.000000   -9999.000000       0.126800       0.111000
57045     57045     shaanxi        109.4833       34.5167          102       158     2012      01        08        008              0.000000       0.319275       0.000000       0.203278   -9999.000000   -9999.000000   -9999.000000   -9999.000000
57045     57045     shaanxi        109.4833       34.5167          102       158     2012      01        09        009              0.300542       1.275085       0.000000       0.207664   -9999.000000   -9999.000000   -9999.000000       0.021000
57045     57045     shaanxi        109.4833       34.5167          102       158     2012      01        10        010              0.301792       1.860931       0.000000       0.210521   -9999.000000   -9999.000000       0.064600       0.194000
57045     57045     shaanxi        109.4833       34.5167          102       158     2012      01        11        011              0.301417       1.196899       0.058634       0.207742       0.087000   -9999.000000       0.065800       0.201000
57045     57045     shaanxi        109.4833       34.5167          102       158     2012      01        12        012              0.300583       1.620575       0.000000       0.207972       0.100000   -9999.000000       0.076100       0.023000
57045     57045     shaanxi        109.4833       34.5167          102       158     2012      01        13        013              0.301333       1.667816       0.000000       0.209120   -9999.000000   -9999.000000   -9999.000000   -9999.000000
57045     57045     shaanxi        109.4833       34.5167          102       158     2012      01        14        014              0.302375       1.769409       0.000000       0.210568   -9999.000000   -9999.000000   -9999.000000       0.095000
57045     57045     shaanxi        109.4833       34.5167          102       158     2012      01        15        015              0.301000       1.994476       0.000000       0.210837   -9999.000000   -9999.000000       0.044700   -9999.000000
57045     57045     shaanxi        109.4833       34.5167          102       158     2012      01        16        016              0.301000       1.847137       0.728242       0.209895   -9999.000000   -9999.000000       0.060900       0.349000
57045     57045     shaanxi        109.4833       34.5167          102       158     2012      01        17        017              0.000000       1.204651       1.672838       0.209766   -9999.000000   -9999.000000       0.059400       0.075000
57045     57045     shaanxi        109.4833       34.5167          102       158     2012      01        18        018              0.302000       0.833069       0.749208       0.209076   -9999.000000   -9999.000000       0.066500   -9999.000000
57045     57045     shaanxi        109.4833       34.5167          102       158     2012      01        19        019              0.302333       0.876526       0.232855       0.210343   -9999.000000   -9999.000000   -9999.000000       0.151000
57045     57045     shaanxi        109.4833       34.5167          102       158     2012      01        20        020              0.307958       2.193573       1.200384       0.217796   -9999.000000   -9999.000000       0.061000   -9999.000000
57045     57045     shaanxi        109.4833       34.5167          102       158     2012      01        21        021              0.308042       1.688354       0.000000       0.228059   -9999.000000   -9999.000000       0.025100       0.460000
57045     57045     shaanxi        109.4833       34.5167          102       158     2012      01        22        022              0.306708       0.263092       1.648652       0.212455   -9999.000000   -9999.000000       0.045000   -9999.000000
57045     57045     shaanxi        109.4833       34.5167          102       158     2012      01        23        023              0.304708      -1.048370       0.120706       0.199816   -9999.000000   -9999.000000       0.055600   -9999.000000
57045     57045     shaanxi        109.4833       34.5167          102       158     2012      01        24        024              0.302375      -1.388733       0.000000       0.194837   -9999.000000   -9999.000000   -9999.000000       0.257000
57045     57045     shaanxi        109.4833       34.5167          102       158     2012      01        25        025              0.298708      -1.597046       0.000000       0.193764   -9999.000000   -9999.000000   -9999.000000   -9999.000000
57045     57045     shaanxi        109.4833       34.5167          102       158     2012      01        26        026              0.297042      -0.622559       0.172898       0.197712   -9999.000000   -9999.000000       0.062600       0.224000
57045     57045     shaanxi        109.4833       34.5167          102       158     2012      01        27        027              0.297083       0.373444       2.788500       0.204532       0.108000   -9999.000000       0.067000   -9999.000000
57045     57045     shaanxi        109.4833       34.5167          102       158     2012      01        28        028              0.302458       1.667755       3.124925       0.214066       0.120000   -9999.000000       0.074800       0.270000
57045     57045     shaanxi        109.4833       34.5167          102       158     2012      01        29        029              0.307917       2.973602       0.000000       0.222379   -9999.000000   -9999.000000       0.085500       0.376000
57045     57045     shaanxi        109.4833       34.5167          102       158     2012      01        30        030              0.308125       2.843994       0.000000       0.222201   -9999.000000   -9999.000000   -9999.000000   -9999.000000
57045     57045     shaanxi        109.4833       34.5167          102       158     2012      01        31        031              0.306750       3.173889       0.000000       0.221706   -9999.000000   -9999.000000   -9999.000000       0.384000
57045     57045     shaanxi        109.4833       34.5167          102       158     2012      02        01        032              0.305792       3.975800       0.000000       0.225032       0.104000   -9999.000000       0.041700   -9999.000000
57045     57045     shaanxi        109.4833       34.5167          102       158     2012      02        02        033              0.303167       3.060913       0.000000       0.217483       0.114000   -9999.000000       0.076100       0.145000
57045     57045     shaanxi        109.4833       34.5167          102       158     2012      02        03        034              0.301167       1.916382       0.000000       0.209711       0.107000   -9999.000000       0.079900       0.237000
57045     57045     shaanxi        109.4833       34.5167          102       158     2012      02        04        035              0.301250       2.840637       0.000000       0.212345   -9999.000000   -9999.000000       0.086700       0.246000
57045     57045     shaanxi        109.4833       34.5167          102       158     2012      02        05        036              0.301292       2.944489       0.000000       0.213352   -9999.000000   -9999.000000   -9999.000000       0.170000
57045     57045     shaanxi        109.4833       34.5167          102       158     2012      02        06        037              0.300875       4.033752       0.000000       0.217542       0.089000   -9999.000000       0.071600   -9999.000000
57045     57045     shaanxi        109.4833       34.5167          102       158     2012      02        07        038              0.297750       2.934357       0.000000       0.209222   -9999.000000   -9999.000000       0.039000       0.069000
57045     57045     shaanxi        109.4833       34.5167          102       158     2012      02        08        039              0.296250       0.943665       0.000000       0.199390   -9999.000000   -9999.000000       0.071400       0.170000
57045     57045     shaanxi        109.4833       34.5167          102       158     2012      02        09        040              0.295667       0.751587       0.000000       0.196565   -9999.000000   -9999.000000       0.075400       0.227000
57045     57045     shaanxi        109.4833       34.5167          102       158     2012      02        10        041              0.295958       1.090363       0.000000       0.199256   -9999.000000   -9999.000000       0.078700       0.077000
57045     57045     shaanxi        109.4833       34.5167          102       158     2012      02        11        042              0.294500       2.589447       0.000000       0.200876       0.102000   -9999.000000   -9999.000000   -9999.000000
57045     57045     shaanxi        109.4833       34.5167          102       158     2012      02        12        043              0.296083       3.501099       0.454214       0.204585   -9999.000000   -9999.000000   -9999.000000       0.247000
57045     57045     shaanxi        109.4833       34.5167          102       158     2012      02        13        044              0.295875       4.355621       0.000000       0.206148   -9999.000000   -9999.000000   -9999.000000   -9999.000000
57045     57045     shaanxi        109.4833       34.5167          102       158     2012      02        14        045              0.295667       4.678101       0.000000       0.206327       0.099000   -9999.000000   -9999.000000       0.393000
57045     57045     shaanxi        109.4833       34.5167          102       158     2012      02        15        046              0.295708       5.801605       0.000000       0.206461   -9999.000000   -9999.000000       0.080300       0.190000
57045     57045     shaanxi        109.4833       34.5167          102       158     2012      02        16        047              0.294875       5.135284       0.000000       0.206508   -9999.000000   -9999.000000   -9999.000000   -9999.000000
57045     57045     shaanxi        109.4833       34.5167          102       158     2012      02        17        048              0.293292       4.718872       0.000000       0.202558       0.096000   -9999.000000   -9999.000000       0.204000
57045     57045     shaanxi        109.4833       34.5167          102       158     2012      02        18        049              0.292625       3.391846       0.000000       0.198288       0.104000   -9999.000000       0.031900   -9999.000000
57045     57045     shaanxi        109.4833       34.5167          102       158     2012      02        19        050              0.291625       3.867157       0.000000       0.196927       0.099000   -9999.000000       0.073400       0.400000
57045     57045     shaanxi        109.4833       34.5167          102       158     2012      02        20        051              0.291375       5.074371       0.134496       0.196151   -9999.000000   -9999.000000       0.059500   -9999.000000
57045     57045     shaanxi        109.4833       34.5167          102       158     2012      02        21        052              0.290083       6.689423       0.000000       0.195287   -9999.000000   -9999.000000   -9999.000000   -9999.000000
57045     57045     shaanxi        109.4833       34.5167          102       158     2012      02        22        053              0.290542       5.706909       0.000000       0.195594       0.082000   -9999.000000   -9999.000000       0.353000
57045     57045     shaanxi        109.4833       34.5167          102       158     2012      02        23        054              0.289250       7.574097       0.000000       0.195283       0.111000   -9999.000000       0.069500   -9999.000000
57045     57045     shaanxi        109.4833       34.5167          102       158     2012      02        24        055              0.288833       4.347473       0.000000       0.195727       0.097000   -9999.000000       0.039000       0.466000
57045     57045     shaanxi        109.4833       34.5167          102       158     2012      02        25        056              0.286750       5.863831       0.000000       0.195168   -9999.000000   -9999.000000       0.068700   -9999.000000
57045     57045     shaanxi        109.4833       34.5167          102       158     2012      02        26        057              0.286417       3.732117       0.186969       0.195424   -9999.000000   -9999.000000       0.068600       0.282000
57045     57045     shaanxi        109.4833       34.5167          102       158     2012      02        27        058              0.285667       4.896271       3.012695       0.195643       0.090000   -9999.000000   -9999.000000       0.342000
57045     57045     shaanxi        109.4833       34.5167          102       158     2012      02        28        059              0.285583       5.008362       0.125927       0.195675   -9999.000000   -9999.000000   -9999.000000   -9999.000000
57045     57045     shaanxi        109.4833       34.5167          102       158     2012      02        29        060              0.000000   -9999.000000       0.000000   -9999.000000       0.102000   -9999.000000   -9999.000000   -9999.000000
57045     57045     shaanxi        109.4833       34.5167          102       158     2012      03        01        061              0.285875       5.549896       0.917742       0.195464   -9999.000000   -9999.000000       0.065200   -9999.000000
57045     57045     shaanxi        109.4833       34.5167          102       158     2012      03        02        062              0.286250       5.771820       0.241445       0.210586   -9999.000000   -9999.000000       0.059300       0.294000
57045     57045     shaanxi        109.4833       34.5167          102       158     2012      03        03        063              0.284625       6.929443       0.183830       0.207623   -9999.000000   -9999.000000       0.062100       0.333000
57045     57045     shaanxi        109.4833       34.5167          102       158     2012      03        04        064              0.283250       6.472595       0.000000       0.203861       0.125000   -9999.000000   -9999.000000       0.255000
57045     57045     shaanxi        109.4833       34.5167          102       158     2012      03        05        065              0.282708       6.336761       0.115811       0.200710       0.125000   -9999.000000   -9999.000000       0.344000
57045     57045     shaanxi        109.4833       34.5167          102       158     2012      03        06        066              0.281625       7.456390       0.400696       0.198982       0.116000   -9999.000000       0.027300   -9999.000000
57045     57045     shaanxi        109.4833       34.5167          102       158     2012      03        07        067              0.000000       6.818665       0.164618       0.196897       0.135000   -9999.000000       0.079200       0.227000
57045     57045     shaanxi        109.4833       34.5167          102       158     2012      03        08        068              0.278917       8.033997       0.107487       0.194054       0.135000   -9999.000000       0.063900       0.402000
57045     57045     shaanxi        109.4833       34.5167          102       158     2012      03        09        069              0.277292       8.431610       0.000000       0.195266       0.115000   -9999.000000       0.066600       0.304000
57045     57045     shaanxi        109.4833       34.5167          102       158     2012      03        10        070              0.275292       9.293213       0.000000       0.191855       0.122000   -9999.000000   -9999.000000       0.216000
57045     57045     shaanxi        109.4833       34.5167          102       158     2012      03        11        071              0.271500      11.541260       0.184432       0.187247       0.106000   -9999.000000       0.062900   -9999.000000
57045     57045     shaanxi        109.4833       34.5167          102       158     2012      03        12        072              0.268333       9.485107       0.000000       0.183102   -9999.000000   -9999.000000       0.057600       0.138000
57045     57045     shaanxi        109.4833       34.5167          102       158     2012      03        13        073              0.267708       8.978455       0.000000       0.182731   -9999.000000   -9999.000000       0.078400   -9999.000000
57045     57045     shaanxi        109.4833       34.5167          102       158     2012      03        14        074              0.265708      12.409576       1.545170       0.179734       0.105000   -9999.000000   -9999.000000       0.423000
57045     57045     shaanxi        109.4833       34.5167          102       158     2012      03        15        075              0.268500      12.936310       1.524525       0.182372       0.141500   -9999.000000       0.108000       0.427000
57045     57045     shaanxi        109.4833       34.5167          102       158     2012      03        16        076              0.271500       8.914307       0.000000       0.227905       0.110000   -9999.000000   -9999.000000   -9999.000000
57045     57045     shaanxi        109.4833       34.5167          102       158     2012      03        17        077              0.271083      12.982544       0.000000       0.214381   -9999.000000   -9999.000000       0.060800       0.283000
57045     57045     shaanxi        109.4833       34.5167          102       158     2012      03        18        078              0.266750      15.274872       0.000000       0.203200       0.121000   -9999.000000       0.083900   -9999.000000
57045     57045     shaanxi        109.4833       34.5167          102       158     2012      03        19        079              0.259750      14.716705       0.285995       0.192167       0.113000   -9999.000000       0.109400       0.233000
57045     57045     shaanxi        109.4833       34.5167          102       158     2012      03        20        080              0.258042       9.909973       0.336810       0.188071       0.110000   -9999.000000       0.118100   -9999.000000
57045     57045     shaanxi        109.4833       34.5167          102       158     2012      03        21        081              0.280458      10.096527       2.410868       0.188064       0.219000   -9999.000000   -9999.000000   -9999.000000
57045     57045     shaanxi        109.4833       34.5167          102       158     2012      03        22        082              0.284875       6.227386       0.341335       0.221747       0.198000   -9999.000000   -9999.000000       0.551000
57045     57045     shaanxi        109.4833       34.5167          102       158     2012      03        23        083              0.281417       8.771118       0.385733       0.223960   -9999.000000   -9999.000000       0.061600   -9999.000000
57045     57045     shaanxi        109.4833       34.5167          102       158     2012      03        24        084              0.273667      11.378265       0.000000       0.210384   -9999.000000   -9999.000000       0.094600       0.227000
57045     57045     shaanxi        109.4833       34.5167          102       158     2012      03        25        085              0.000000      14.242981       0.000000       0.197046       0.130000   -9999.000000       0.104100   -9999.000000
57045     57045     shaanxi        109.4833       34.5167          102       158     2012      03        26        086              0.262958      15.883514       0.989644       0.187888       0.154000   -9999.000000       0.147800       0.078000
57045     57045     shaanxi        109.4833       34.5167          102       158     2012      03        27        087              0.257958      16.977997       0.000000       0.188333       0.137000   -9999.000000   -9999.000000       0.286000
57045     57045     shaanxi        109.4833       34.5167          102       158     2012      03        28        088              0.260167      17.987000       4.136722       0.181438       0.238000   -9999.000000       0.177400   -9999.000000
57045     57045     shaanxi        109.4833       34.5167          102       158     2012      03        29        089              0.269958      14.038818       1.170633       0.223460       0.176000   -9999.000000       0.124700       0.312000
57045     57045     shaanxi        109.4833       34.5167          102       158     2012      03        30        090              0.262583      18.005005       0.000000       0.223641       0.141000   -9999.000000       0.158100   -9999.000000
57045     57045     shaanxi        109.4833       34.5167          102       158     2012      03        31        091              0.252917      16.053070       0.461261       0.205060       0.148500   -9999.000000       0.147800       0.073000
57045     57045     shaanxi        109.4833       34.5167          102       158     2012      04        01        092              0.244458      17.783051       0.000000       0.189411       0.173000   -9999.000000   -9999.000000       0.142000
57045     57045     shaanxi        109.4833       34.5167          102       158     2012      04        02        093              0.238625      19.872101       0.074143       0.180731   -9999.000000   -9999.000000   -9999.000000       0.119000
57045     57045     shaanxi        109.4833       34.5167          102       158     2012      04        03        094              0.230333      16.172943       0.000000       0.178459       0.200000   -9999.000000       0.102000       0.068000
57045     57045     shaanxi        109.4833       34.5167          102       158     2012      04        04        095              0.223042      18.181244       0.000000       0.173638       0.159000   -9999.000000       0.146000   -9999.000000
57045     57045     shaanxi        109.4833       34.5167          102       158     2012      04        05        096              0.214667      20.467865       0.388237       0.170481       0.168500   -9999.000000       0.125600       0.024000
57045     57045     shaanxi        109.4833       34.5167          102       158     2012      04        06        097              0.207167      20.771362       0.000000       0.168346       0.164000   -9999.000000       0.140200       0.060000
57045     57045     shaanxi        109.4833       34.5167          102       158     2012      04        07        098              0.200375      21.325439       0.000000       0.167196   -9999.000000   -9999.000000   -9999.000000       0.109000
57045     57045     shaanxi        109.4833       34.5167          102       158     2012      04        08        099              0.194083      22.234375       0.000000       0.166365       0.182000   -9999.000000       0.137200       0.046000
57045     57045     shaanxi        109.4833       34.5167          102       158     2012      04        09        100              0.190750      23.774628       0.057430       0.165445       0.199000   -9999.000000       0.098400   -9999.000000
57045     57045     shaanxi        109.4833       34.5167          102       158     2012      04        10        101              0.187000      21.031189       0.000000       0.166447       0.163500   -9999.000000       0.171800       0.009000
57045     57045     shaanxi        109.4833       34.5167          102       158     2012      04        11        102              0.186417      22.959351       6.613739       0.165836       0.195000   -9999.000000       0.151700   -9999.000000
57045     57045     shaanxi        109.4833       34.5167          102       158     2012      04        12        103              0.208875      21.865417       0.666676       0.191789       0.255000   -9999.000000       0.186000       0.202000
57045     57045     shaanxi        109.4833       34.5167          102       158     2012      04        13        104              0.207083      15.468475       0.000000       0.244553       0.245000   -9999.000000   -9999.000000   -9999.000000
57045     57045     shaanxi        109.4833       34.5167          102       158     2012      04        14        105              0.203292      19.289215       0.000000       0.214164       0.230000   -9999.000000       0.155000   -9999.000000
57045     57045     shaanxi        109.4833       34.5167          102       158     2012      04        15        106              0.198750      20.387634       0.000000       0.196415       0.196500   -9999.000000       0.135400       0.112000
57045     57045     shaanxi        109.4833       34.5167          102       158     2012      04        16        107              0.194000      22.287720       0.202572       0.183385       0.222000   -9999.000000       0.154500   -9999.000000
57045     57045     shaanxi        109.4833       34.5167          102       158     2012      04        17        108              0.190417      23.551300       0.048676       0.176210       0.206000   -9999.000000       0.161200       0.037000
57045     57045     shaanxi        109.4833       34.5167          102       158     2012      04        18        109              0.186125      21.208191       0.000000       0.174566   -9999.000000   -9999.000000   -9999.000000   -9999.000000
57045     57045     shaanxi        109.4833       34.5167          102       158     2012      04        19        110              0.182375      23.984100       0.889403       0.170078       0.254000   -9999.000000   -9999.000000   -9999.000000
57045     57045     shaanxi        109.4833       34.5167          102       158     2012      04        20        111              0.179708      22.545807       0.752918       0.175482       0.208500   -9999.000000       0.092300       0.126000
57045     57045     shaanxi        109.4833       34.5167          102       158     2012      04        21        112              0.176125      22.327148       0.000000       0.177214       0.218000   -9999.000000       0.156400   -9999.000000
57045     57045     shaanxi        109.4833       34.5167          102       158     2012      04        22        113              0.174208      25.570190       0.000000       0.168562       0.191000   -9999.000000   -9999.000000       0.061000
57045     57045     shaanxi        109.4833       34.5167          102       158     2012      04        23        114              0.176542      27.186310       1.826636       0.164993   -9999.000000   -9999.000000       0.174300   -9999.000000
57045     57045     shaanxi        109.4833       34.5167          102       158     2012      04        24        115              0.197000      25.363647       0.179443       0.181962       0.293000   -9999.000000   -9999.000000       0.391000
57045     57045     shaanxi        109.4833       34.5167          102       158     2012      04        25        116              0.000000      19.963959       0.863411       0.183025       0.202000   -9999.000000       0.203200       0.108000
57045     57045     shaanxi        109.4833       34.5167          102       158     2012      04        26        117              0.183583      21.688354       0.000000       0.170077       0.198000   -9999.000000       0.111600   -9999.000000
57045     57045     shaanxi        109.4833       34.5167          102       158     2012      04        27        118              0.177375      24.964630       0.000000       0.163501       0.184000   -9999.000000       0.160000       0.181000
57045     57045     shaanxi        109.4833       34.5167          102       158     2012      04        28        119              0.172667      27.884369       1.828491       0.161341       0.177000   -9999.000000       0.171300   -9999.000000
57045     57045     shaanxi        109.4833       34.5167          102       158     2012      04        29        120              0.168458      28.297821       0.000000       0.171651       0.244000   -9999.000000       0.180400       0.084000
57045     57045     shaanxi        109.4833       34.5167          102       158     2012      04        30        121              0.165208      27.091614       0.959692       0.174274       0.265500   -9999.000000   -9999.000000       0.214000
57045     57045     shaanxi        109.4833       34.5167          102       158     2012      05        01        122              0.174417      22.425751       0.892367       0.177400       0.263000   -9999.000000       0.169400       0.301000
57045     57045     shaanxi        109.4833       34.5167          102       158     2012      05        02        123              0.184875      20.521179       0.868580       0.191135       0.230000   -9999.000000       0.168000       0.442000
57045     57045     shaanxi        109.4833       34.5167          102       158     2012      05        03        124              0.189917      23.125305       1.013016       0.190041       0.214000   -9999.000000       0.159100   -9999.000000
57045     57045     shaanxi        109.4833       34.5167          102       158     2012      05        04        125              0.189500      24.628540       0.000000       0.192987       0.219000   -9999.000000       0.167400       0.090000
57045     57045     shaanxi        109.4833       34.5167          102       158     2012      05        05        126              0.183625      27.408508       0.000000       0.179425       0.200000   -9999.000000   -9999.000000       0.101000
57045     57045     shaanxi        109.4833       34.5167          102       158     2012      05        06        127              0.178708      29.295074       0.438783       0.166973       0.187500   -9999.000000   -9999.000000       0.093000
57045     57045     shaanxi        109.4833       34.5167          102       158     2012      05        07        128              0.174875      30.224426       0.238482       0.163009   -9999.000000   -9999.000000       0.092900       0.073000
57045     57045     shaanxi        109.4833       34.5167          102       158     2012      05        08        129              0.172083      28.702423       0.000000       0.162859       0.180000   -9999.000000       0.159600   -9999.000000
57045     57045     shaanxi        109.4833       34.5167          102       158     2012      05        09        130              0.168667      32.104248       0.000000       0.160393   -9999.000000   -9999.000000       0.144300       0.029000
57045     57045     shaanxi        109.4833       34.5167          102       158     2012      05        10        131              0.165917      30.757996       2.391124       0.159429       0.218000   -9999.000000       0.157000   -9999.000000
57045     57045     shaanxi        109.4833       34.5167          102       158     2012      05        11        132              0.167042      31.934998       5.431598       0.159272       0.257000   -9999.000000   -9999.000000       0.494000
57045     57045     shaanxi        109.4833       34.5167          102       158     2012      05        12        133              0.166792      23.585846       0.000000       0.225419       0.213000   -9999.000000       0.165900       0.127000
57045     57045     shaanxi        109.4833       34.5167          102       158     2012      05        13        134              0.164250      23.190155       0.497255       0.202861       0.195000   -9999.000000       0.102300   -9999.000000
57045     57045     shaanxi        109.4833       34.5167          102       158     2012      05        14        135              0.162042      22.231445       0.000000       0.185597   -9999.000000   -9999.000000       0.170400       0.025000
57045     57045     shaanxi        109.4833       34.5167          102       158     2012      05        15        136              0.159250      25.265228       0.000000       0.172494       0.203000   -9999.000000       0.159700   -9999.000000
57045     57045     shaanxi        109.4833       34.5167          102       158     2012      05        16        137              0.159417      27.509125       0.683922       0.163888       0.172000   -9999.000000       0.168200       0.128000
57045     57045     shaanxi        109.4833       34.5167          102       158     2012      05        17        138              0.158958      28.175995       0.000000       0.161586       0.170000   -9999.000000   -9999.000000   -9999.000000
57045     57045     shaanxi        109.4833       34.5167          102       158     2012      05        18        139              0.157208      28.875641       0.000000       0.159762       0.170000   -9999.000000       0.148700   -9999.000000
57045     57045     shaanxi        109.4833       34.5167          102       158     2012      05        19        140              0.156500      28.997009       0.000000       0.159467       0.168000   -9999.000000       0.168200       0.279000
57045     57045     shaanxi        109.4833       34.5167          102       158     2012      05        20        141              0.155042      31.935120       0.428550       0.158417   -9999.000000   -9999.000000       0.155100   -9999.000000
57045     57045     shaanxi        109.4833       34.5167          102       158     2012      05        21        142              0.150750      31.898560      10.437145       0.157297   -9999.000000   -9999.000000       0.196500       0.708000
57045     57045     shaanxi        109.4833       34.5167          102       158     2012      05        22        143              0.179125      22.004486       0.667703       0.226880       0.206000   -9999.000000   -9999.000000   -9999.000000
57045     57045     shaanxi        109.4833       34.5167          102       158     2012      05        23        144              0.188583      21.605469       0.899629       0.257940   -9999.000000   -9999.000000   -9999.000000       0.315000
57045     57045     shaanxi        109.4833       34.5167          102       158     2012      05        24        145              0.189958      21.937927       0.137621       0.231189       0.199000   -9999.000000       0.081000       0.311000
57045     57045     shaanxi        109.4833       34.5167          102       158     2012      05        25        146              0.000000      21.251587       1.285436       0.217857       0.200000   -9999.000000       0.155100   -9999.000000
57045     57045     shaanxi        109.4833       34.5167          102       158     2012      05        26        147              0.188792      25.142914       0.157098       0.198947       0.195000   -9999.000000       0.137300       0.340000
57045     57045     shaanxi        109.4833       34.5167          102       158     2012      05        27        148              0.182500      29.323395       0.000000       0.180689       0.153000   -9999.000000       0.148500   -9999.000000
57045     57045     shaanxi        109.4833       34.5167          102       158     2012      05        28        149              0.208167      31.678101      21.845776       0.171345   -9999.000000   -9999.000000   -9999.000000       0.180000
57045     57045     shaanxi        109.4833       34.5167          102       158     2012      05        29        150              0.269875      25.424957       2.101496       0.254224       0.185000   -9999.000000       0.168400       0.530000
57045     57045     shaanxi        109.4833       34.5167          102       158     2012      05        30        151              0.248000      25.447327       0.461248       0.284164   -9999.000000   -9999.000000       0.102000   -9999.000000
57045     57045     shaanxi        109.4833       34.5167          102       158     2012      05        31        152              0.234000      27.675903       0.000000       0.246242       0.192000   -9999.000000       0.135800   -9999.000000
57045     57045     shaanxi        109.4833       34.5167          102       158     2012      06        01        153              0.221087      25.706970       0.000000       0.229461       0.082500   -9999.000000       0.154000   -9999.000000
57045     57045     shaanxi        109.4833       34.5167          102       158     2012      06        02        154              0.204167      28.746368       0.000000       0.206363       0.088500   -9999.000000       0.144700       0.343000
57045     57045     shaanxi        109.4833       34.5167          102       158     2012      06        03        155              0.189542      29.467255       0.000000       0.190503       0.091000   -9999.000000   -9999.000000       0.391000
57045     57045     shaanxi        109.4833       34.5167          102       158     2012      06        04        156              0.181708      29.035431       0.000000       0.183649   -9999.000000   -9999.000000       0.100100       0.419000
57045     57045     shaanxi        109.4833       34.5167          102       158     2012      06        05        157              0.175375      31.387390       0.556371       0.178206       0.114000   -9999.000000       0.128200       0.281000
57045     57045     shaanxi        109.4833       34.5167          102       158     2012      06        06        158              0.170625      27.191711       0.135547       0.182927       0.100000   -9999.000000       0.119100   -9999.000000
57045     57045     shaanxi        109.4833       34.5167          102       158     2012      06        07        159              0.167458      27.574463       0.000000       0.179522       0.090000   -9999.000000       0.130500       0.291000
57045     57045     shaanxi        109.4833       34.5167          102       158     2012      06        08        160              0.162792      31.802338       0.000000       0.171484       0.085000   -9999.000000   -9999.000000   -9999.000000
57045     57045     shaanxi        109.4833       34.5167          102       158     2012      06        09        161              0.161583      31.727753       0.000000       0.169394       0.083000   -9999.000000   -9999.000000       0.444000
57045     57045     shaanxi        109.4833       34.5167          102       158     2012      06        10        162              0.157458      34.267792       0.000000       0.166428       0.090000   -9999.000000       0.060800       0.316000
57045     57045     shaanxi        109.4833       34.5167          102       158     2012      06        11        163              0.000000      33.961578       0.000000       0.164882       0.078000   -9999.000000       0.119300   -9999.000000
57045     57045     shaanxi        109.4833       34.5167          102       158     2012      06        12        164              0.149792      32.705505       0.000000       0.163607       0.071000   -9999.000000       0.113100       0.469000
57045     57045     shaanxi        109.4833       34.5167          102       158     2012      06        13        165              0.148167      34.363129       0.000000       0.162473       0.077500   -9999.000000       0.124500   -9999.000000
57045     57045     shaanxi        109.4833       34.5167          102       158     2012      06        14        166              0.144750      36.059937       2.849241       0.161422       0.074000   -9999.000000   -9999.000000       0.542000
57045     57045     shaanxi        109.4833       34.5167          102       158     2012      06        15        167              0.143250      32.473419       0.000000       0.160867       0.083000   -9999.000000       0.111000   -9999.000000
57045     57045     shaanxi        109.4833       34.5167          102       158     2012      06        16        168              0.141083      32.984711       0.000000       0.160469       0.083000   -9999.000000       0.091900   -9999.000000
57045     57045     shaanxi        109.4833       34.5167          102       158     2012      06        17        169              0.140625      33.845703       0.619652       0.159766       0.074000   -9999.000000       0.129700       0.649000
57045     57045     shaanxi        109.4833       34.5167          102       158     2012      06        18        170              0.138833      35.582306      16.735394       0.160729       0.083000   -9999.000000       0.096300   -9999.000000
57045     57045     shaanxi        109.4833       34.5167          102       158     2012      06        19        171              0.276375      32.152588       8.739331       0.246732   -9999.000000   -9999.000000       0.126900       0.822000
57045     57045     shaanxi        109.4833       34.5167          102       158     2012      06        20        172              0.267292      26.440399       0.000000       0.302514   -9999.000000   -9999.000000   -9999.000000   -9999.000000
57045     57045     shaanxi        109.4833       34.5167          102       158     2012      06        21        173              0.247083      30.576202       0.321890       0.252981       0.099000   -9999.000000       0.089500       0.652000
57045     57045     shaanxi        109.4833       34.5167          102       158     2012      06        22        174              0.230333      32.323853       0.000000       0.221522       0.078000   -9999.000000       0.098600       0.633000
57045     57045     shaanxi        109.4833       34.5167          102       158     2012      06        23        175              0.216792      33.802246       0.000000       0.200030       0.082500   -9999.000000       0.102400   -9999.000000
57045     57045     shaanxi        109.4833       34.5167          102       158     2012      06        24        176              0.205417      35.172974       0.548947       0.187012       0.086000   -9999.000000       0.108300       0.559000
57045     57045     shaanxi        109.4833       34.5167          102       158     2012      06        25        177              0.202125      34.084991       5.255405       0.183313       0.106000   -9999.000000   -9999.000000   -9999.000000
57045     57045     shaanxi        109.4833       34.5167          102       158     2012      06        26        178              0.206792      28.514221       1.410544       0.246379       0.106000   -9999.000000   -9999.000000       0.612000
57045     57045     shaanxi        109.4833       34.5167          102       158     2012      06        27        179              0.214208      28.223907       0.000000       0.234635       0.103000   -9999.000000       0.066000       0.601000
57045     57045     shaanxi        109.4833       34.5167          102       158     2012      06        28        180              0.210667      29.161987       2.867915       0.214876       0.086500   -9999.000000       0.125000       0.483000
57045     57045     shaanxi        109.4833       34.5167          102       158     2012      06        29        181              0.287417      29.093597      12.406125       0.196509   -9999.000000   -9999.000000       0.125800       1.000000
57045     57045     shaanxi        109.4833       34.5167          102       158     2012      06        30        182              0.282583      26.306519       0.000000       0.296389       0.102000   -9999.000000       0.122500   -9999.000000
57045     57045     shaanxi        109.4833       34.5167          102       158     2012      07        01        183              0.268167      30.100677       2.732163       0.251538   -9999.000000   -9999.000000   -9999.000000       0.673000
57045     57045     shaanxi        109.4833       34.5167          102       158     2012      07        02        184              0.321458      32.738037      10.102306       0.227006       0.133000   -9999.000000       0.101400       0.828000
57045     57045     shaanxi        109.4833       34.5167          102       158     2012      07        03        185              0.307500      26.059937       2.011495       0.305510       0.107000   -9999.000000       0.079800       0.733000
57045     57045     shaanxi        109.4833       34.5167          102       158     2012      07        04        186              0.346917      31.497253      15.147288       0.269636       0.140000   -9999.000000       0.113700       0.985000
57045     57045     shaanxi        109.4833       34.5167          102       158     2012      07        05        187              0.330708      27.113007       0.000000       0.327648       0.111000   -9999.000000       0.118100   -9999.000000
57045     57045     shaanxi        109.4833       34.5167          102       158     2012      07        06        188              0.320042      30.498138       1.417775       0.283405   -9999.000000   -9999.000000   -9999.000000       0.707000
57045     57045     shaanxi        109.4833       34.5167          102       158     2012      07        07        189              0.337917      30.935028       6.287325       0.262954   -9999.000000   -9999.000000   -9999.000000   -9999.000000
57045     57045     shaanxi        109.4833       34.5167          102       158     2012      07        08        190              0.345500      29.509552       7.053139       0.290135       0.128500   -9999.000000       0.085300       1.000000
57045     57045     shaanxi        109.4833       34.5167          102       158     2012      07        09        191              0.349917      27.738831       9.433470       0.311188       0.139000   -9999.000000       0.129000       0.967000
57045     57045     shaanxi        109.4833       34.5167          102       158     2012      07        10        192              0.288625      26.414429       0.345225       0.331946       0.101000   -9999.000000       0.116200   -9999.000000
57045     57045     shaanxi        109.4833       34.5167          102       158     2012      07        11        193              0.246083      31.531738       1.502118       0.292237   -9999.000000   -9999.000000       0.107200       0.713000
57045     57045     shaanxi        109.4833       34.5167          102       158     2012      07        12        194              0.234000      31.704071       0.000000       0.277274       0.142000   -9999.000000   -9999.000000   -9999.000000
57045     57045     shaanxi        109.4833       34.5167          102       158     2012      07        13        195              0.222250      32.220734       1.403621       0.255845       0.144500   -9999.000000       0.114200       0.681000
57045     57045     shaanxi        109.4833       34.5167          102       158     2012      07        14        196              0.212875      31.328308       0.000000       0.248102       0.138500   -9999.000000       0.060300   -9999.000000
57045     57045     shaanxi        109.4833       34.5167          102       158     2012      07        15        197              0.202667      30.675964       0.000000       0.233840       0.134000   -9999.000000       0.099700   -9999.000000
57045     57045     shaanxi        109.4833       34.5167          102       158     2012      07        16        198              0.191708      31.404480       0.000000       0.217073       0.125000   -9999.000000       0.119500       0.715000
57045     57045     shaanxi        109.4833       34.5167          102       158     2012      07        17        199              0.177833      31.375092       0.000000       0.204785       0.141000   -9999.000000       0.119000   -9999.000000
57045     57045     shaanxi        109.4833       34.5167          102       158     2012      07        18        200              0.167458      30.992493       0.000000       0.196092       0.131000   -9999.000000   -9999.000000       0.614000
57045     57045     shaanxi        109.4833       34.5167          102       158     2012      07        19        201              0.162625      32.680756       0.000000       0.189494       0.114500   -9999.000000       0.108200   -9999.000000
57045     57045     shaanxi        109.4833       34.5167          102       158     2012      07        20        202              0.155042      32.243164       0.000000       0.186200       0.126500   -9999.000000       0.124300       0.467000
57045     57045     shaanxi        109.4833       34.5167          102       158     2012      07        21        203              0.151565      33.630463       6.798836       0.183238   -9999.000000   -9999.000000       0.130500       0.922000
57045     57045     shaanxi        109.4833       34.5167          102       158     2012      07        22        204              0.148250      30.330048       0.000000       0.241892   -9999.000000   -9999.000000       0.125500   -9999.000000
57045     57045     shaanxi        109.4833       34.5167          102       158     2012      07        23        205              0.140875      31.768250       0.230635       0.221320       0.210000   -9999.000000   -9999.000000       0.759000
57045     57045     shaanxi        109.4833       34.5167          102       158     2012      07        24        206              0.134667      29.644836       2.055234       0.204918       0.162500   -9999.000000   -9999.000000   -9999.000000
57045     57045     shaanxi        109.4833       34.5167          102       158     2012      07        25        207              0.126917      32.580688       0.000000       0.192005       0.151000   -9999.000000       0.077400       0.509000
57045     57045     shaanxi        109.4833       34.5167          102       158     2012      07        26        208              0.117125      33.999420       1.099164       0.183908       0.153000       0.315900       0.131000       0.753000
57045     57045     shaanxi        109.4833       34.5167          102       158     2012      07        27        209              0.106458      37.089661       0.000000       0.184690       0.146000   -9999.000000       0.123400       0.494000
57045     57045     shaanxi        109.4833       34.5167          102       158     2012      07        28        210              0.098375      36.873383       0.000000       0.176698       0.184000   -9999.000000       0.131300       0.598000
57045     57045     shaanxi        109.4833       34.5167          102       158     2012      07        29        211              0.092250      38.566498       0.000000       0.171445       0.176000   -9999.000000   -9999.000000   -9999.000000
57045     57045     shaanxi        109.4833       34.5167          102       158     2012      07        30        212              0.099792      38.931488      15.921889       0.170105       0.146000   -9999.000000       0.157400       0.872000
57045     57045     shaanxi        109.4833       34.5167          102       158     2012      07        31        213              0.124542      33.486420       0.311748       0.257908       0.222500   -9999.000000       0.098200       0.697000
57045     57045     shaanxi        109.4833       34.5167          102       158     2012      08        01        214              0.125000      29.507782       0.068515       0.274039       0.220000   -9999.000000       0.138100       0.681000
57045     57045     shaanxi        109.4833       34.5167          102       158     2012      08        02        215              0.119375      28.811676       0.000000       0.253201   -9999.000000   -9999.000000       0.137100       0.644000
57045     57045     shaanxi        109.4833       34.5167          102       158     2012      08        03        216              0.109583      31.535522       0.204260       0.228251       0.220000       0.111500       0.124900   -9999.000000
57045     57045     shaanxi        109.4833       34.5167          102       158     2012      08        04        217              0.101125      33.157135       0.000000       0.206478       0.181500   -9999.000000   -9999.000000       0.579000
57045     57045     shaanxi        109.4833       34.5167          102       158     2012      08        05        218              0.095167      33.724792       0.823757       0.189686       0.211000   -9999.000000       0.114900   -9999.000000
57045     57045     shaanxi        109.4833       34.5167          102       158     2012      08        06        219              0.092167      32.057800       0.467887       0.187130       0.216000   -9999.000000       0.171100       0.562000
57045     57045     shaanxi        109.4833       34.5167          102       158     2012      08        07        220              0.090708      33.040344       0.000000       0.181874       0.179000   -9999.000000       0.146000       0.502000
57045     57045     shaanxi        109.4833       34.5167          102       158     2012      08        08        221              0.088292      35.796051       0.259158       0.173674       0.240000   -9999.000000       0.165200   -9999.000000
57045     57045     shaanxi        109.4833       34.5167          102       158     2012      08        09        222              0.085083      35.560364       0.638917       0.172195       0.227000   -9999.000000   -9999.000000       0.490000
57045     57045     shaanxi        109.4833       34.5167          102       158     2012      08        10        223              0.082292      33.613129       0.000000       0.175365       0.197000   -9999.000000   -9999.000000   -9999.000000
57045     57045     shaanxi        109.4833       34.5167          102       158     2012      08        11        224              0.080167      34.390564       0.000000       0.168896       0.194000   -9999.000000       0.088300       0.571000
57045     57045     shaanxi        109.4833       34.5167          102       158     2012      08        12        225              0.077250      35.677643       0.555172       0.166542       0.209000   -9999.000000       0.178000   -9999.000000
57045     57045     shaanxi        109.4833       34.5167          102       158     2012      08        13        226              0.072417      33.885651       0.000000       0.167658       0.248000   -9999.000000       0.127400   -9999.000000
57045     57045     shaanxi        109.4833       34.5167          102       158     2012      08        14        227              0.070125      29.377167       1.874964       0.167140       0.266000   -9999.000000       0.144400       0.679000
57045     57045     shaanxi        109.4833       34.5167          102       158     2012      08        15        228              0.073125      28.088745       0.000000       0.186473       0.198500   -9999.000000   -9999.000000   -9999.000000
57045     57045     shaanxi        109.4833       34.5167          102       158     2012      08        16        229              0.074958      30.911591       0.000000       0.175002       0.229500   -9999.000000       0.111300       0.551000
57045     57045     shaanxi        109.4833       34.5167          102       158     2012      08        17        230              0.074667      33.051422       2.459458       0.165819       0.199000   -9999.000000       0.114300   -9999.000000
57045     57045     shaanxi        109.4833       34.5167          102       158     2012      08        18        231              0.092958      32.844757       7.544850       0.172804   -9999.000000       0.177500       0.142300       0.941000
57045     57045     shaanxi        109.4833       34.5167          102       158     2012      08        19        232              0.226583      26.689667      23.008699       0.268380       0.332000   -9999.000000       0.152300       0.975000
57045     57045     shaanxi        109.4833       34.5167          102       158     2012      08        20        233              0.254875      24.627960       1.262977       0.330721       0.257000   -9999.000000       0.191600   -9999.000000
57045     57045     shaanxi        109.4833       34.5167          102       158     2012      08        21        234              0.248292      25.462433       0.000000       0.302356       0.209000   -9999.000000   -9999.000000       0.573000
57045     57045     shaanxi        109.4833       34.5167          102       158     2012      08        22        235              0.236583      27.546234       0.000000       0.273443       0.200000   -9999.000000       0.151100   -9999.000000
57045     57045     shaanxi        109.4833       34.5167          102       158     2012      08        23        236              0.225458      26.873108       0.000000       0.249129       0.195000       0.067500       0.187600       0.359000
57045     57045     shaanxi        109.4833       34.5167          102       158     2012      08        24        237              0.215750      26.582611       0.000000       0.228489   -9999.000000   -9999.000000       0.166700   -9999.000000
57045     57045     shaanxi        109.4833       34.5167          102       158     2012      08        25        238              0.000000      27.917908       7.652756       0.211078   -9999.000000   -9999.000000       0.186200   -9999.000000
57045     57045     shaanxi        109.4833       34.5167          102       158     2012      08        26        239              0.205833      28.600739       0.388501       0.226267       0.223000       0.219700   -9999.000000       0.522000
57045     57045     shaanxi        109.4833       34.5167          102       158     2012      08        27        240              0.202125      28.220673       3.061232       0.263058       0.216000   -9999.000000   -9999.000000   -9999.000000
57045     57045     shaanxi        109.4833       34.5167          102       158     2012      08        28        241              0.197000      28.878906       0.000000       0.233281       0.180000   -9999.000000       0.088800       0.479000
57045     57045     shaanxi        109.4833       34.5167          102       158     2012      08        29        242              0.189208      30.055389       0.000000       0.210600   -9999.000000   -9999.000000       0.171500       0.548000
57045     57045     shaanxi        109.4833       34.5167          102       158     2012      08        30        243              0.181708      31.599335       7.147014       0.192529   -9999.000000   -9999.000000       0.146700       0.419000
57045     57045     shaanxi        109.4833       34.5167          102       158     2012      08        31        244              0.275250      31.660675      29.689945       0.201697   -9999.000000       0.177500       0.200000       0.927000
57045     57045     shaanxi        109.4833       34.5167          102       158     2012      09        01        245              0.277167      24.132599      14.704384       0.353976       0.292000   -9999.000000   -9999.000000   -9999.000000
57045     57045     shaanxi        109.4833       34.5167          102       158     2012      09        02        246              0.267000      21.753265       0.314170       0.355714       0.212000   -9999.000000       0.180900       0.766000
57045     57045     shaanxi        109.4833       34.5167          102       158     2012      09        03        247              0.257375      24.504669       0.156881       0.321087       0.181000   -9999.000000       0.159400   -9999.000000
57045     57045     shaanxi        109.4833       34.5167          102       158     2012      09        04        248              0.248042      25.866028       0.000000       0.302144       0.216000   -9999.000000       0.187800       0.680000
57045     57045     shaanxi        109.4833       34.5167          102       158     2012      09        05        249              0.239625      26.252106       0.000000       0.286537       0.210000       0.132900       0.178200       0.540000
57045     57045     shaanxi        109.4833       34.5167          102       158     2012      09        06        250              0.230542      27.581238       0.852502       0.272697       0.185000   -9999.000000   -9999.000000   -9999.000000
57045     57045     shaanxi        109.4833       34.5167          102       158     2012      09        07        251              0.241708      26.325836      11.123002       0.263907       0.253000   -9999.000000   -9999.000000       1.000000
57045     57045     shaanxi        109.4833       34.5167          102       158     2012      09        08        252              0.265583      25.799194       5.263869       0.293868       0.272000       0.101500       0.138600   -9999.000000
57045     57045     shaanxi        109.4833       34.5167          102       158     2012      09        09        253              0.259375      24.679077       0.930305       0.324101       0.212000   -9999.000000       0.191700       0.713000
57045     57045     shaanxi        109.4833       34.5167          102       158     2012      09        10        254              0.279083      25.717957      30.822533       0.295688       0.311000       0.091200       0.241300   -9999.000000
57045     57045     shaanxi        109.4833       34.5167          102       158     2012      09        11        255              0.276000      22.015320       3.725640       0.368652       0.177000   -9999.000000       0.224100   -9999.000000
57045     57045     shaanxi        109.4833       34.5167          102       158     2012      09        12        256              0.266667      24.405457       0.060824       0.339801       0.212000   -9999.000000   -9999.000000       0.722000
57045     57045     shaanxi        109.4833       34.5167          102       158     2012      09        13        257              0.257125      21.849121       0.000000       0.322603       0.152000       0.263400       0.230800   -9999.000000
57045     57045     shaanxi        109.4833       34.5167          102       158     2012      09        14        258              0.248042      21.477264       0.000000       0.309257   -9999.000000   -9999.000000       0.107200       0.667000
57045     57045     shaanxi        109.4833       34.5167          102       158     2012      09        15        259              0.248000      22.144012       6.473770       0.298940       0.205000       0.148400       0.218800   -9999.000000
57045     57045     shaanxi        109.4833       34.5167          102       158     2012      09        16        260              0.252125      22.760162       0.217949       0.310674       0.169000   -9999.000000       0.200600       0.666000
57045     57045     shaanxi        109.4833       34.5167          102       158     2012      09        17        261              0.247750      21.969269       0.000000       0.310342       0.152500   -9999.000000       0.202700       0.667000
57045     57045     shaanxi        109.4833       34.5167          102       158     2012      09        18        262              0.242750      23.693420       0.000000       0.297471       0.152000   -9999.000000   -9999.000000   -9999.000000
57045     57045     shaanxi        109.4833       34.5167          102       158     2012      09        19        263              0.237750      24.121857       0.000000       0.287648       0.127000   -9999.000000       0.184200       0.690000
57045     57045     shaanxi        109.4833       34.5167          102       158     2012      09        20        264              0.236417      24.596924       3.124286       0.278240       0.226000   -9999.000000       0.213300   -9999.000000
57045     57045     shaanxi        109.4833       34.5167          102       158     2012      09        21        265              0.240417      22.431183       5.788283       0.289808   -9999.000000   -9999.000000       0.194100       0.545000
57045     57045     shaanxi        109.4833       34.5167          102       158     2012      09        22        266              0.236333      22.987335       0.000000       0.287423       0.130000   -9999.000000       0.199600       0.645000
57045     57045     shaanxi        109.4833       34.5167          102       158     2012      09        23        267              0.234208      22.900543       0.000000       0.280161       0.134500       0.220300   -9999.000000       0.572000
57045     57045     shaanxi        109.4833       34.5167          102       158     2012      09        24        268              0.230833      24.443176       0.000000       0.272401       0.128000   -9999.000000   -9999.000000       0.511000
57045     57045     shaanxi        109.4833       34.5167          102       158     2012      09        25        269              0.252250      24.377838      11.552541       0.264541   -9999.000000   -9999.000000       0.131700   -9999.000000
57045     57045     shaanxi        109.4833       34.5167          102       158     2012      09        26        270              0.255667      21.270569       0.000000       0.313978       0.171000   -9999.000000       0.220000       0.733000
57045     57045     shaanxi        109.4833       34.5167          102       158     2012      09        27        271              0.251643      21.304596       0.000000       0.304375       0.116500   -9999.000000       0.193400       0.681000
57045     57045     shaanxi        109.4833       34.5167          102       158     2012      09        28        272              0.237333      22.166870       0.000000       0.290091       0.108000   -9999.000000       0.197100       0.523000
57045     57045     shaanxi        109.4833       34.5167          102       158     2012      09        29        273              0.232458      19.628418       0.000000       0.277741       0.122000   -9999.000000   -9999.000000       0.512000
57045     57045     shaanxi        109.4833       34.5167          102       158     2012      09        30        274              0.226583      20.629639       0.000000       0.270516       0.121000   -9999.000000       0.199300   -9999.000000
57045     57045     shaanxi        109.4833       34.5167          102       158     2012      10        01        275              0.221458      20.703918       0.000000       0.262999       0.092000   -9999.000000       0.104200       0.483000
57045     57045     shaanxi        109.4833       34.5167          102       158     2012      10        02        276              0.220542      21.508484       0.887783       0.255668       0.100000   -9999.000000       0.188900   -9999.000000
57045     57045     shaanxi        109.4833       34.5167          102       158     2012      10        03        277              0.219458      20.276703       0.000000       0.259654       0.085500       0.093200       0.162600       0.760000
57045     57045     shaanxi        109.4833       34.5167          102       158     2012      10        04        278              0.215875      22.337250       1.350201       0.254521       0.099000   -9999.000000       0.180100       0.532000
57045     57045     shaanxi        109.4833       34.5167          102       158     2012      10        05        279              0.212500      21.005493       0.000000       0.250240       0.092000   -9999.000000   -9999.000000   -9999.000000
57045     57045     shaanxi        109.4833       34.5167          102       158     2012      10        06        280              0.208167      21.496216       0.000000       0.244265       0.106000       0.153400       0.150100       0.594000
57045     57045     shaanxi        109.4833       34.5167          102       158     2012      10        07        281              0.205583      20.404999       0.000000       0.239611       0.104000   -9999.000000       0.181600   -9999.000000
57045     57045     shaanxi        109.4833       34.5167          102       158     2012      10        08        282              0.204458      19.416901       1.664590       0.238831       0.103000   -9999.000000       0.123300       0.923000
57045     57045     shaanxi        109.4833       34.5167          102       158     2012      10        09        283              0.202417      18.695404       0.000000       0.253754       0.096000   -9999.000000       0.114500   -9999.000000
57045     57045     shaanxi        109.4833       34.5167          102       158     2012      10        10        284              0.196667      19.915314       0.000000       0.246050       0.091000   -9999.000000   -9999.000000   -9999.000000
57045     57045     shaanxi        109.4833       34.5167          102       158     2012      10        11        285              0.193042      19.959961       0.000000       0.237036   -9999.000000       0.206600   -9999.000000       0.547000
57045     57045     shaanxi        109.4833       34.5167          102       158     2012      10        12        286              0.190667      20.517059       0.000000       0.230637       0.084000   -9999.000000       0.052300   -9999.000000
57045     57045     shaanxi        109.4833       34.5167          102       158     2012      10        13        287              0.186875      19.740662       0.000000       0.229714       0.077500   -9999.000000       0.110100       0.534000
57045     57045     shaanxi        109.4833       34.5167          102       158     2012      10        14        288              0.182292      21.125214       0.000000       0.223980       0.082000   -9999.000000       0.102900   -9999.000000
57045     57045     shaanxi        109.4833       34.5167          102       158     2012      10        15        289              0.181875      19.996368       4.721196       0.218521       0.088000   -9999.000000       0.098900       0.272000
57045     57045     shaanxi        109.4833       34.5167          102       158     2012      10        16        290              0.216083      17.769989       1.036895       0.230641       0.093000       0.176400   -9999.000000       0.637000
57045     57045     shaanxi        109.4833       34.5167          102       158     2012      10        17        291              0.203667      15.597351       0.000000       0.269848       0.094000   -9999.000000       0.094000   -9999.000000
57045     57045     shaanxi        109.4833       34.5167          102       158     2012      10        18        292              0.197958      15.738312       0.000000       0.249793       0.099000   -9999.000000       0.070200       0.592000
57045     57045     shaanxi        109.4833       34.5167          102       158     2012      10        19        293              0.195500      13.796997       0.000000       0.245948       0.084000       0.161200       0.098400   -9999.000000
57045     57045     shaanxi        109.4833       34.5167          102       158     2012      10        20        294              0.192917      17.137329       0.079009       0.240482       0.090500   -9999.000000       0.104600       0.237000
57045     57045     shaanxi        109.4833       34.5167          102       158     2012      10        21        295              0.240542      18.813477       6.506324       0.234647       0.146000       0.132800       0.140100       0.884000
57045     57045     shaanxi        109.4833       34.5167          102       158     2012      10        22        296              0.234583      14.406799       0.273664       0.280353   -9999.000000   -9999.000000   -9999.000000       0.739000
57045     57045     shaanxi        109.4833       34.5167          102       158     2012      10        23        297              0.224875      14.717926       0.058644       0.267816   -9999.000000   -9999.000000       0.072400       0.621000
57045     57045     shaanxi        109.4833       34.5167          102       158     2012      10        24        298              0.220750      11.438354       0.000000       0.262538   -9999.000000   -9999.000000       0.088900   -9999.000000
57045     57045     shaanxi        109.4833       34.5167          102       158     2012      10        25        299              0.000000      15.054688       0.000000       0.255761       0.108000   -9999.000000       0.084200       0.355000
57045     57045     shaanxi        109.4833       34.5167          102       158     2012      10        26        300              0.215292      15.854980       0.000000       0.249627       0.107000   -9999.000000       0.089300       0.427000
57045     57045     shaanxi        109.4833       34.5167          102       158     2012      10        27        301              0.212417      16.624359       0.346938       0.245505       0.098000   -9999.000000   -9999.000000       0.403000
57045     57045     shaanxi        109.4833       34.5167          102       158     2012      10        28        302              0.000000      16.476776       0.488419       0.240954       0.136000       0.261600   -9999.000000       0.696000
57045     57045     shaanxi        109.4833       34.5167          102       158     2012      10        29        303              0.213125      15.705994       0.397360       0.243008   -9999.000000       0.047200       0.034000   -9999.000000
57045     57045     shaanxi        109.4833       34.5167          102       158     2012      10        30        304              0.207667      15.471497       0.000000       0.247558       0.095000   -9999.000000       0.087000       0.359000
57045     57045     shaanxi        109.4833       34.5167          102       158     2012      10        31        305              0.202958      14.131134       0.000000       0.238109       0.105000   -9999.000000       0.076200   -9999.000000
57045     57045     shaanxi        109.4833       34.5167          102       158     2012      11        01        306              0.198875      13.569977       0.000000       0.231814       0.110000   -9999.000000       0.083500       0.519000
57045     57045     shaanxi        109.4833       34.5167          102       158     2012      11        02        307              0.199083      12.598816       0.964079       0.228390   -9999.000000   -9999.000000   -9999.000000       0.327000
57045     57045     shaanxi        109.4833       34.5167          102       158     2012      11        03        308              0.212333      14.340546       0.000000       0.229237   -9999.000000       0.098800       0.074200   -9999.000000
57045     57045     shaanxi        109.4833       34.5167          102       158     2012      11        04        309              0.203042       9.982422       0.215234       0.230572       0.092000   -9999.000000       0.065400       0.346000
57045     57045     shaanxi        109.4833       34.5167          102       158     2012      11        05        310              0.196750       8.913361       0.000000       0.225963       0.121000   -9999.000000       0.080400   -9999.000000
57045     57045     shaanxi        109.4833       34.5167          102       158     2012      11        06        311              0.193208       9.048920       0.268124       0.221628       0.120000       0.222300       0.083800       0.562000
57045     57045     shaanxi        109.4833       34.5167          102       158     2012      11        07        312              0.193083      10.152435       0.025104       0.220144   -9999.000000   -9999.000000   -9999.000000   -9999.000000
57045     57045     shaanxi        109.4833       34.5167          102       158     2012      11        08        313              0.190167       9.261902       0.000000       0.222637       0.127000   -9999.000000   -9999.000000   -9999.000000
57045     57045     shaanxi        109.4833       34.5167          102       158     2012      11        09        314              0.189125      11.121613       1.165920       0.221205       0.142000   -9999.000000       0.076100       0.449000
57045     57045     shaanxi        109.4833       34.5167          102       158     2012      11        10        315              0.207125      10.226349       0.647180       0.227183   -9999.000000   -9999.000000       0.084000   -9999.000000
57045     57045     shaanxi        109.4833       34.5167          102       158     2012      11        11        316              0.202833       7.689178       0.000000       0.244042       0.134000   -9999.000000       0.081400       0.535000
57045     57045     shaanxi        109.4833       34.5167          102       158     2012      11        12        317              0.199958       7.620270       0.000000       0.233960       0.122000   -9999.000000       0.079100   -9999.000000
57045     57045     shaanxi        109.4833       34.5167          102       158     2012      11        13        318              0.000000       8.718903       0.000000       0.229271   -9999.000000   -9999.000000   -9999.000000       0.245000
57045     57045     shaanxi        109.4833       34.5167          102       158     2012      11        14        319              0.194292       9.035400       0.000000       0.224382       0.139000   -9999.000000       0.082300       0.461000
57045     57045     shaanxi        109.4833       34.5167          102       158     2012      11        15        320              0.197042       9.181122       1.446479       0.221945   -9999.000000   -9999.000000       0.046600   -9999.000000
57045     57045     shaanxi        109.4833       34.5167          102       158     2012      11        16        321              0.199958       6.957794       0.000000       0.238748       0.142000       0.019800       0.080900       0.474000
57045     57045     shaanxi        109.4833       34.5167          102       158     2012      11        17        322              0.000000       8.732666       0.000000       0.236557       0.126000   -9999.000000       0.077600   -9999.000000
57045     57045     shaanxi        109.4833       34.5167          102       158     2012      11        18        323              0.195708       8.709351       0.000000       0.231329   -9999.000000   -9999.000000       0.079900       0.225000
57045     57045     shaanxi        109.4833       34.5167          102       158     2012      11        19        324              0.195000       9.452271       0.182393       0.228487       0.159000   -9999.000000   -9999.000000       0.434000
57045     57045     shaanxi        109.4833       34.5167          102       158     2012      11        20        325              0.194500       9.187317       0.000000       0.226747       0.124000   -9999.000000       0.070500       0.285000
57045     57045     shaanxi        109.4833       34.5167          102       158     2012      11        21        326              0.193333       8.234833       0.059845       0.227086       0.122500       0.113500       0.088200       0.379000
57045     57045     shaanxi        109.4833       34.5167          102       158     2012      11        22        327              0.192417      10.071930       0.176791       0.225639       0.133000   -9999.000000       0.068200   -9999.000000
57045     57045     shaanxi        109.4833       34.5167          102       158     2012      11        23        328              0.188875       8.687683       0.000000       0.227019       0.122000   -9999.000000       0.076200       0.191000
57045     57045     shaanxi        109.4833       34.5167          102       158     2012      11        24        329              0.187667       7.328888       3.951972       0.222222   -9999.000000   -9999.000000   -9999.000000       0.454000
57045     57045     shaanxi        109.4833       34.5167          102       158     2012      11        25        330              0.218458       6.655579       1.499160       0.230395   -9999.000000   -9999.000000   -9999.000000       0.769000
57045     57045     shaanxi        109.4833       34.5167          102       158     2012      11        26        331              0.209167       5.775543       0.161285       0.268709       0.128000       0.059800   -9999.000000       0.404000
57045     57045     shaanxi        109.4833       34.5167          102       158     2012      11        27        332              0.204833       5.819305       0.038424       0.252651       0.134000   -9999.000000       0.076600   -9999.000000
57045     57045     shaanxi        109.4833       34.5167          102       158     2012      11        28        333              0.200667       5.958527       0.039700       0.247832   -9999.000000       0.191900       0.068000       0.218000
57045     57045     shaanxi        109.4833       34.5167          102       158     2012      11        29        334              0.197250       3.611237       0.000000       0.238497   -9999.000000       0.212900       0.077700   -9999.000000
57045     57045     shaanxi        109.4833       34.5167          102       158     2012      11        30        335              0.195583       2.518066       0.102314       0.231184   -9999.000000   -9999.000000   -9999.000000       0.486000
57045     57045     shaanxi        109.4833       34.5167          102       158     2012      12        01        336              0.198250       3.139587       0.826789       0.235776   -9999.000000   -9999.000000       0.087600       0.501000
57045     57045     shaanxi        109.4833       34.5167          102       158     2012      12        02        337              0.198792       2.851227       0.000000       0.246914   -9999.000000   -9999.000000       0.038600   -9999.000000
57045     57045     shaanxi        109.4833       34.5167          102       158     2012      12        03        338              0.194208       2.176483       4.871963       0.244019       0.133000   -9999.000000       0.073300       0.253000
57045     57045     shaanxi        109.4833       34.5167          102       158     2012      12        04        339              0.191750       4.685608       0.090158       0.239881   -9999.000000       0.261200       0.083200   -9999.000000
57045     57045     shaanxi        109.4833       34.5167          102       158     2012      12        05        340              0.190833       5.330963       0.000000       0.239818   -9999.000000   -9999.000000       0.075800       0.402000
57045     57045     shaanxi        109.4833       34.5167          102       158     2012      12        06        341              0.190208       5.190002       0.000000       0.233542       0.129000   -9999.000000   -9999.000000   -9999.000000
57045     57045     shaanxi        109.4833       34.5167          102       158     2012      12        07        342              0.189417       5.861420       0.000000       0.232842       0.122000   -9999.000000       0.054300   -9999.000000
57045     57045     shaanxi        109.4833       34.5167          102       158     2012      12        08        343              0.186167       6.111084       0.000000       0.229487       0.126000   -9999.000000       0.076000       0.201000
57045     57045     shaanxi        109.4833       34.5167          102       158     2012      12        09        344              0.184042       3.414978       0.000000       0.221395       0.126000       0.143600       0.064400   -9999.000000
57045     57045     shaanxi        109.4833       34.5167          102       158     2012      12        10        345              0.183167       2.604492       0.068860       0.216768   -9999.000000   -9999.000000       0.068800       0.305000
57045     57045     shaanxi        109.4833       34.5167          102       158     2012      12        11        346              0.181958       2.731903       0.000000       0.215626   -9999.000000   -9999.000000   -9999.000000   -9999.000000
57045     57045     shaanxi        109.4833       34.5167          102       158     2012      12        12        347              0.181750       1.597717       0.299995       0.212004   -9999.000000   -9999.000000   -9999.000000       0.052000
57045     57045     shaanxi        109.4833       34.5167          102       158     2012      12        13        348              0.182792       1.697906       0.049664       0.214150   -9999.000000   -9999.000000       0.012700       0.385000
57045     57045     shaanxi        109.4833       34.5167          102       158     2012      12        14        349              0.183875       1.349121       0.000000       0.218448   -9999.000000   -9999.000000       0.076900   -9999.000000
57045     57045     shaanxi        109.4833       34.5167          102       158     2012      12        15        350              0.000000       2.731720       0.000000       0.223499   -9999.000000   -9999.000000       0.074100       0.437000
57045     57045     shaanxi        109.4833       34.5167          102       158     2012      12        16        351              0.183958       1.648071       0.216465       0.224250   -9999.000000   -9999.000000       0.073900   -9999.000000
57045     57045     shaanxi        109.4833       34.5167          102       158     2012      12        17        352              0.184625       3.038513       0.101043       0.229232       0.102000       0.400700   -9999.000000       0.222000
57045     57045     shaanxi        109.4833       34.5167          102       158     2012      12        18        353              0.182083       3.638458       0.000000       0.228591       0.103000   -9999.000000       0.067600       0.254000
57045     57045     shaanxi        109.4833       34.5167          102       158     2012      12        19        354              0.181542       3.009857       0.000000       0.221570   -9999.000000   -9999.000000       0.056200       0.266000
57045     57045     shaanxi        109.4833       34.5167          102       158     2012      12        20        355              0.000000       2.283966       0.190021       0.221213   -9999.000000   -9999.000000       0.077500       0.461000
57045     57045     shaanxi        109.4833       34.5167          102       158     2012      12        21        356              0.182083       0.879181       0.106062       0.215086   -9999.000000   -9999.000000       0.083600   -9999.000000
57045     57045     shaanxi        109.4833       34.5167          102       158     2012      12        22        357              0.181042       2.084259       0.000000       0.218522   -9999.000000       0.450400   -9999.000000       0.135000
57045     57045     shaanxi        109.4833       34.5167          102       158     2012      12        23        358              0.176917       0.805786       0.000000       0.207374   -9999.000000   -9999.000000   -9999.000000       0.155000
57045     57045     shaanxi        109.4833       34.5167          102       158     2012      12        24        359              0.173474      -2.003418       0.000000       0.186120   -9999.000000   -9999.000000       0.026300       0.025000
57045     57045     shaanxi        109.4833       34.5167          102       158     2012      12        25        360              0.171042      -1.252533       0.000000       0.189620   -9999.000000   -9999.000000       0.076100       0.074000
57045     57045     shaanxi        109.4833       34.5167          102       158     2012      12        26        361              0.000000      -0.335358       0.000000       0.194831   -9999.000000   -9999.000000       0.061300   -9999.000000
57045     57045     shaanxi        109.4833       34.5167          102       158     2012      12        27        362              0.169083      -1.194733       0.000000       0.190912   -9999.000000   -9999.000000       0.071500       0.028000
57045     57045     shaanxi        109.4833       34.5167          102       158     2012      12        28        363              0.000000      -0.662750       0.000000       0.193504   -9999.000000   -9999.000000   -9999.000000   -9999.000000
57045     57045     shaanxi        109.4833       34.5167          102       158     2012      12        29        364              0.000000      -0.434082       0.000000       0.197111   -9999.000000   -9999.000000       0.073800       0.215000
57045     57045     shaanxi        109.4833       34.5167          102       158     2012      12        30        365              0.000000      -1.402283       0.000000       0.190243   -9999.000000   -9999.000000       0.012300   -9999.000000
57045     57045     shaanxi        109.4833       34.5167          102       158     2012      12        31        366              0.161800      -0.674957       0.000000       0.191431   -9999.000000   -9999.000000       0.065900   -9999.000000
