# Supplementary material for: Research on Fusing Multisatellite Soil Moisture Data Based on Bayesian Model Averaging
Source: Hindawi journal article supplement (doi:10.1155/2018/9310838), 2018-06-25
Supplement: f1 [file 9310838.f1.zip › 2012_sm00-10cm_daily_ZDB_ZHY_57048_366days_allin.txt]

57048     57048     shaanxi        108.7167       34.4000          102       155     2012      01        01        001              0.000000   -9999.000000       0.000000   -9999.000000       0.096000   -9999.000000       0.046000   -9999.000000
57048     57048     shaanxi        108.7167       34.4000          102       155     2012      01        02        002              0.144042       0.072815       0.000000       0.198369       0.099000   -9999.000000   -9999.000000       0.219000
57048     57048     shaanxi        108.7167       34.4000          102       155     2012      01        03        003              0.000000       1.260864       0.000000       0.205921   -9999.000000   -9999.000000       0.057100   -9999.000000
57048     57048     shaanxi        108.7167       34.4000          102       155     2012      01        04        004              0.125739      -0.305634       0.000000       0.196719   -9999.000000   -9999.000000       0.034300       0.027000
57048     57048     shaanxi        108.7167       34.4000          102       155     2012      01        05        005              0.110125      -1.531952       0.000000       0.188760   -9999.000000   -9999.000000       0.055100       0.023000
57048     57048     shaanxi        108.7167       34.4000          102       155     2012      01        06        006              0.110500      -2.139771       0.000000       0.185095       0.087000   -9999.000000       0.055900       0.148000
57048     57048     shaanxi        108.7167       34.4000          102       155     2012      01        07        007              0.128750      -0.562012       0.000000       0.193723   -9999.000000   -9999.000000       0.056100   -9999.000000
57048     57048     shaanxi        108.7167       34.4000          102       155     2012      01        08        008              0.000000      -1.075226       0.000000       0.192452       0.095000   -9999.000000   -9999.000000   -9999.000000
57048     57048     shaanxi        108.7167       34.4000          102       155     2012      01        09        009              0.121208       0.400330       0.000000       0.200305   -9999.000000   -9999.000000   -9999.000000       0.114000
57048     57048     shaanxi        108.7167       34.4000          102       155     2012      01        10        010              0.122708       1.116760       0.000000       0.204109   -9999.000000   -9999.000000       0.037500   -9999.000000
57048     57048     shaanxi        108.7167       34.4000          102       155     2012      01        11        011              0.120917       0.334137       0.000000       0.201051       0.089000   -9999.000000       0.035100       0.028000
57048     57048     shaanxi        108.7167       34.4000          102       155     2012      01        12        012              0.122292       0.479889       0.000000       0.200390       0.100000   -9999.000000       0.041200   -9999.000000
57048     57048     shaanxi        108.7167       34.4000          102       155     2012      01        13        013              0.126625       0.584381       0.000000       0.200998   -9999.000000   -9999.000000   -9999.000000   -9999.000000
57048     57048     shaanxi        108.7167       34.4000          102       155     2012      01        14        014              0.127167       0.691925       1.530779       0.203831   -9999.000000   -9999.000000   -9999.000000       0.080000
57048     57048     shaanxi        108.7167       34.4000          102       155     2012      01        15        015              0.119833       0.987122       0.000000       0.203645   -9999.000000   -9999.000000       0.015600   -9999.000000
57048     57048     shaanxi        108.7167       34.4000          102       155     2012      01        16        016              0.119208       0.773834       0.000000       0.202065   -9999.000000   -9999.000000       0.034100       0.147000
57048     57048     shaanxi        108.7167       34.4000          102       155     2012      01        17        017              0.000000       0.416016       0.000000       0.202053       0.098000   -9999.000000       0.036200   -9999.000000
57048     57048     shaanxi        108.7167       34.4000          102       155     2012      01        18        018              0.123583       1.274200       0.000000       0.206800   -9999.000000   -9999.000000       0.036800   -9999.000000
57048     57048     shaanxi        108.7167       34.4000          102       155     2012      01        19        019              0.125792      -0.051361       0.000000       0.202640   -9999.000000   -9999.000000   -9999.000000       0.181000
57048     57048     shaanxi        108.7167       34.4000          102       155     2012      01        20        020              0.133708       0.333588       0.530936       0.204944   -9999.000000   -9999.000000       0.038900   -9999.000000
57048     57048     shaanxi        108.7167       34.4000          102       155     2012      01        21        021              0.142625       0.514404       0.406794       0.210099   -9999.000000   -9999.000000       0.024600       0.226000
57048     57048     shaanxi        108.7167       34.4000          102       155     2012      01        22        022              0.150292      -0.698883       0.204732       0.200447   -9999.000000   -9999.000000       0.027600   -9999.000000
57048     57048     shaanxi        108.7167       34.4000          102       155     2012      01        23        023              0.146167      -2.873718       0.157272       0.184097   -9999.000000   -9999.000000       0.028700       0.006000
57048     57048     shaanxi        108.7167       34.4000          102       155     2012      01        24        024              0.129333      -3.410248       0.000000       0.178464   -9999.000000   -9999.000000   -9999.000000       0.006000
57048     57048     shaanxi        108.7167       34.4000          102       155     2012      01        25        025              0.118375      -3.468536       0.959305       0.178713   -9999.000000   -9999.000000   -9999.000000   -9999.000000
57048     57048     shaanxi        108.7167       34.4000          102       155     2012      01        26        026              0.125542      -2.196686       0.000000       0.185980   -9999.000000   -9999.000000       0.025400       0.042000
57048     57048     shaanxi        108.7167       34.4000          102       155     2012      01        27        027              0.132667      -0.787933       0.000000       0.194400       0.096000   -9999.000000       0.028600   -9999.000000
57048     57048     shaanxi        108.7167       34.4000          102       155     2012      01        28        028              0.180208       0.480164       0.000000       0.202375       0.108000   -9999.000000       0.039200       0.292000
57048     57048     shaanxi        108.7167       34.4000          102       155     2012      01        29        029              0.190333       1.683075       0.000000       0.209598   -9999.000000   -9999.000000       0.042500       0.280000
57048     57048     shaanxi        108.7167       34.4000          102       155     2012      01        30        030              0.184417       1.631439       0.000000       0.210017   -9999.000000   -9999.000000   -9999.000000       0.391000
57048     57048     shaanxi        108.7167       34.4000          102       155     2012      01        31        031              0.176833       2.433380       0.000000       0.211732   -9999.000000   -9999.000000   -9999.000000       0.297000
57048     57048     shaanxi        108.7167       34.4000          102       155     2012      02        01        032              0.174833       3.883087       0.000000       0.217564   -9999.000000   -9999.000000       0.022300   -9999.000000
57048     57048     shaanxi        108.7167       34.4000          102       155     2012      02        02        033              0.164167       2.145325       0.000000       0.209659   -9999.000000   -9999.000000       0.036700       0.008000
57048     57048     shaanxi        108.7167       34.4000          102       155     2012      02        03        034              0.156000       0.642700       0.000000       0.200524       0.110000   -9999.000000       0.044600       0.210000
57048     57048     shaanxi        108.7167       34.4000          102       155     2012      02        04        035              0.157375       2.127075       0.000000       0.205906   -9999.000000   -9999.000000       0.046100       0.343000
57048     57048     shaanxi        108.7167       34.4000          102       155     2012      02        05        036              0.154042       2.441559       0.000000       0.207358   -9999.000000   -9999.000000   -9999.000000       0.122000
57048     57048     shaanxi        108.7167       34.4000          102       155     2012      02        06        037              0.150542       3.312531       0.000000       0.210904   -9999.000000   -9999.000000       0.044100   -9999.000000
57048     57048     shaanxi        108.7167       34.4000          102       155     2012      02        07        038              0.139583       2.106537       0.000000       0.203129   -9999.000000   -9999.000000       0.034500       0.029000
57048     57048     shaanxi        108.7167       34.4000          102       155     2012      02        08        039              0.134958      -0.296112       0.000000       0.192268       0.097000   -9999.000000       0.042200   -9999.000000
57048     57048     shaanxi        108.7167       34.4000          102       155     2012      02        09        040              0.133667      -0.428436       0.000000       0.190362   -9999.000000   -9999.000000       0.045800       0.182000
57048     57048     shaanxi        108.7167       34.4000          102       155     2012      02        10        041              0.133958      -0.322510       0.000000       0.191532   -9999.000000   -9999.000000       0.044100   -9999.000000
57048     57048     shaanxi        108.7167       34.4000          102       155     2012      02        11        042              0.129750       1.148651       0.000000       0.195138       0.094000   -9999.000000   -9999.000000   -9999.000000
57048     57048     shaanxi        108.7167       34.4000          102       155     2012      02        12        043              0.133542       2.137024       0.000000       0.198846   -9999.000000   -9999.000000   -9999.000000       0.092000
57048     57048     shaanxi        108.7167       34.4000          102       155     2012      02        13        044              0.132000       2.764008       0.000000       0.201794   -9999.000000   -9999.000000   -9999.000000   -9999.000000
57048     57048     shaanxi        108.7167       34.4000          102       155     2012      02        14        045              0.130958       3.387878       0.000000       0.203244       0.097000   -9999.000000   -9999.000000       0.239000
57048     57048     shaanxi        108.7167       34.4000          102       155     2012      02        15        046              0.129083       4.866577       0.226212       0.205983   -9999.000000   -9999.000000       0.045300   -9999.000000
57048     57048     shaanxi        108.7167       34.4000          102       155     2012      02        16        047              0.126913       3.665527       0.403948       0.206174   -9999.000000   -9999.000000   -9999.000000   -9999.000000
57048     57048     shaanxi        108.7167       34.4000          102       155     2012      02        17        048              0.123917       3.177582       0.000000       0.201608       0.093000   -9999.000000       0.043000       0.061000
57048     57048     shaanxi        108.7167       34.4000          102       155     2012      02        18        049              0.122500       1.941406       0.000000       0.196356       0.100000   -9999.000000       0.015200   -9999.000000
57048     57048     shaanxi        108.7167       34.4000          102       155     2012      02        19        050              0.121208       2.305298       0.000000       0.196179       0.095000   -9999.000000       0.038000       0.327000
57048     57048     shaanxi        108.7167       34.4000          102       155     2012      02        20        051              0.120083       3.965485       0.000000       0.198155   -9999.000000   -9999.000000       0.042100   -9999.000000
57048     57048     shaanxi        108.7167       34.4000          102       155     2012      02        21        052              0.117833       4.852753       0.000000       0.199382   -9999.000000   -9999.000000   -9999.000000       0.161000
57048     57048     shaanxi        108.7167       34.4000          102       155     2012      02        22        053              0.117458       4.928802       0.000000       0.199992       0.087000   -9999.000000   -9999.000000       0.283000
57048     57048     shaanxi        108.7167       34.4000          102       155     2012      02        23        054              0.114375       6.239227       2.360297       0.201531       0.100000   -9999.000000       0.044900   -9999.000000
57048     57048     shaanxi        108.7167       34.4000          102       155     2012      02        24        055              0.114125       3.460236       0.000000       0.200340       0.093000   -9999.000000       0.035800       0.257000
57048     57048     shaanxi        108.7167       34.4000          102       155     2012      02        25        056              0.111250       4.608856       0.000000       0.199228   -9999.000000   -9999.000000       0.049600   -9999.000000
57048     57048     shaanxi        108.7167       34.4000          102       155     2012      02        26        057              0.110375       2.197662       0.411044       0.197099   -9999.000000   -9999.000000       0.048100       0.229000
57048     57048     shaanxi        108.7167       34.4000          102       155     2012      02        27        058              0.109417       2.571747       0.000000       0.199040       0.088000   -9999.000000   -9999.000000       0.130000
57048     57048     shaanxi        108.7167       34.4000          102       155     2012      02        28        059              0.109292       3.259949       0.000000       0.200896       0.087000   -9999.000000   -9999.000000       0.274000
57048     57048     shaanxi        108.7167       34.4000          102       155     2012      02        29        060              0.000000   -9999.000000       0.042635   -9999.000000       0.092000   -9999.000000   -9999.000000   -9999.000000
57048     57048     shaanxi        108.7167       34.4000          102       155     2012      03        01        061              0.114667       3.527802       0.324353       0.202374   -9999.000000   -9999.000000       0.047300   -9999.000000
57048     57048     shaanxi        108.7167       34.4000          102       155     2012      03        02        062              0.118250       3.737671       0.497269       0.209338   -9999.000000   -9999.000000       0.041800       0.266000
57048     57048     shaanxi        108.7167       34.4000          102       155     2012      03        03        063              0.117667       4.558350       0.960063       0.208776       0.123000   -9999.000000       0.041600       0.268000
57048     57048     shaanxi        108.7167       34.4000          102       155     2012      03        04        064              0.116875       4.843903       0.030235       0.206871       0.116000   -9999.000000   -9999.000000       0.255000
57048     57048     shaanxi        108.7167       34.4000          102       155     2012      03        05        065              0.114875       4.447632       0.000000       0.205518       0.110000   -9999.000000       0.047600       0.207000
57048     57048     shaanxi        108.7167       34.4000          102       155     2012      03        06        066              0.113208       5.825928       0.000000       0.205096       0.103000   -9999.000000       0.028100   -9999.000000
57048     57048     shaanxi        108.7167       34.4000          102       155     2012      03        07        067              0.000000       5.229340       0.084183       0.202147       0.112000   -9999.000000       0.051000       0.162000
57048     57048     shaanxi        108.7167       34.4000          102       155     2012      03        08        068              0.115042       5.765442       0.237842       0.201186       0.120000   -9999.000000       0.052300   -9999.000000
57048     57048     shaanxi        108.7167       34.4000          102       155     2012      03        09        069              0.118125       5.133179       0.991772       0.203295       0.115000   -9999.000000       0.048300       0.307000
57048     57048     shaanxi        108.7167       34.4000          102       155     2012      03        10        070              0.118917       6.241241       0.000000       0.204421       0.112000   -9999.000000   -9999.000000       0.028000
57048     57048     shaanxi        108.7167       34.4000          102       155     2012      03        11        071              0.116167       9.962646       0.000000       0.201150       0.092000   -9999.000000       0.045600   -9999.000000
57048     57048     shaanxi        108.7167       34.4000          102       155     2012      03        12        072              0.112083       8.571747       0.000000       0.195800   -9999.000000   -9999.000000       0.034100       0.073000
57048     57048     shaanxi        108.7167       34.4000          102       155     2012      03        13        073              0.111000       8.327393       0.000000       0.193666   -9999.000000   -9999.000000       0.042300   -9999.000000
57048     57048     shaanxi        108.7167       34.4000          102       155     2012      03        14        074              0.109917      11.910706       0.392680       0.190526       0.093500   -9999.000000   -9999.000000       0.256000
57048     57048     shaanxi        108.7167       34.4000          102       155     2012      03        15        075              0.131167      12.168091       0.236793       0.189260       0.115000   -9999.000000   -9999.000000   -9999.000000
57048     57048     shaanxi        108.7167       34.4000          102       155     2012      03        16        076              0.132875       7.407501       0.000000       0.196621       0.093000   -9999.000000   -9999.000000   -9999.000000
57048     57048     shaanxi        108.7167       34.4000          102       155     2012      03        17        077              0.129208      12.389221       0.000000       0.193140   -9999.000000   -9999.000000       0.028800       0.149000
57048     57048     shaanxi        108.7167       34.4000          102       155     2012      03        18        078              0.123458      14.807495       0.000000       0.187772       0.095000   -9999.000000       0.044300   -9999.000000
57048     57048     shaanxi        108.7167       34.4000          102       155     2012      03        19        079              0.114833      14.657349       0.000000       0.182825       0.090000   -9999.000000       0.051200       0.158000
57048     57048     shaanxi        108.7167       34.4000          102       155     2012      03        20        080              0.111417       8.964813       0.678457       0.183087       0.091500   -9999.000000       0.051100   -9999.000000
57048     57048     shaanxi        108.7167       34.4000          102       155     2012      03        21        081              0.108750       8.759064       0.304421       0.185011       0.142000   -9999.000000   -9999.000000       0.235000
57048     57048     shaanxi        108.7167       34.4000          102       155     2012      03        22        082              0.112958       5.501434       7.077694       0.190744       0.136000   -9999.000000       0.059600       0.305000
57048     57048     shaanxi        108.7167       34.4000          102       155     2012      03        23        083              0.112833       7.160919       0.000000       0.233794   -9999.000000   -9999.000000       0.024000   -9999.000000
57048     57048     shaanxi        108.7167       34.4000          102       155     2012      03        24        084              0.111417      10.284454       0.000000       0.218871       0.105000   -9999.000000       0.045000       0.153000
57048     57048     shaanxi        108.7167       34.4000          102       155     2012      03        25        085              0.000000      13.729187       0.000000       0.206597       0.102000   -9999.000000       0.047900   -9999.000000
57048     57048     shaanxi        108.7167       34.4000          102       155     2012      03        26        086              0.100875      15.409393       0.000000       0.198368       0.098000   -9999.000000       0.056800       0.148000
57048     57048     shaanxi        108.7167       34.4000          102       155     2012      03        27        087              0.095750      16.790802       0.000000       0.192798       0.101000   -9999.000000   -9999.000000       0.218000
57048     57048     shaanxi        108.7167       34.4000          102       155     2012      03        28        088              0.097792      17.280853       0.716687       0.189150       0.151000   -9999.000000       0.075100       0.098000
57048     57048     shaanxi        108.7167       34.4000          102       155     2012      03        29        089              0.108792      12.997711       0.000000       0.199925       0.119000   -9999.000000       0.065900       0.157000
57048     57048     shaanxi        108.7167       34.4000          102       155     2012      03        30        090              0.102042      17.167908       0.000000       0.196788       0.096000   -9999.000000       0.051000   -9999.000000
57048     57048     shaanxi        108.7167       34.4000          102       155     2012      03        31        091              0.097042      13.841553       0.434907       0.189114       0.110500   -9999.000000       0.059600       0.092000
57048     57048     shaanxi        108.7167       34.4000          102       155     2012      04        01        092              0.091583      17.696014       0.000000       0.183489       0.128000   -9999.000000   -9999.000000       0.119000
57048     57048     shaanxi        108.7167       34.4000          102       155     2012      04        02        093              0.083667      19.042694       0.000000       0.180182   -9999.000000   -9999.000000   -9999.000000       0.232000
57048     57048     shaanxi        108.7167       34.4000          102       155     2012      04        03        094              0.078667      15.661469       0.000000       0.178544       0.122000   -9999.000000       0.035400       0.149000
57048     57048     shaanxi        108.7167       34.4000          102       155     2012      04        04        095              0.073542      17.188934       0.000000       0.175838       0.114000   -9999.000000       0.057800   -9999.000000
57048     57048     shaanxi        108.7167       34.4000          102       155     2012      04        05        096              0.067708      20.459839       0.000000       0.173170       0.118000   -9999.000000       0.052400       0.138000
57048     57048     shaanxi        108.7167       34.4000          102       155     2012      04        06        097              0.063458      19.008118       0.000000       0.171620       0.118000   -9999.000000       0.053700   -9999.000000
57048     57048     shaanxi        108.7167       34.4000          102       155     2012      04        07        098              0.059625      19.379456       0.000000       0.170771   -9999.000000   -9999.000000   -9999.000000       0.107000
57048     57048     shaanxi        108.7167       34.4000          102       155     2012      04        08        099              0.056375      20.920868       0.000000       0.169772       0.125000   -9999.000000       0.059400       0.093000
57048     57048     shaanxi        108.7167       34.4000          102       155     2012      04        09        100              0.052500      22.409729       0.053645       0.169130       0.124500   -9999.000000       0.041800   -9999.000000
57048     57048     shaanxi        108.7167       34.4000          102       155     2012      04        10        101              0.052042      18.470856       0.162645       0.171381       0.120500   -9999.000000       0.068900       0.158000
57048     57048     shaanxi        108.7167       34.4000          102       155     2012      04        11        102              0.049542      21.899597       3.574992       0.170423       0.131000   -9999.000000       0.065600   -9999.000000
57048     57048     shaanxi        108.7167       34.4000          102       155     2012      04        12        103              0.051000      19.667786       0.119256       0.179873       0.155000   -9999.000000       0.068900       0.063000
57048     57048     shaanxi        108.7167       34.4000          102       155     2012      04        13        104              0.052333      15.052155       0.000000       0.217485       0.155000   -9999.000000   -9999.000000   -9999.000000
57048     57048     shaanxi        108.7167       34.4000          102       155     2012      04        14        105              0.050042      18.832153       1.049626       0.193696       0.152000   -9999.000000       0.067500   -9999.000000
57048     57048     shaanxi        108.7167       34.4000          102       155     2012      04        15        106              0.047708      19.848389       0.000000       0.181530       0.131500   -9999.000000       0.067700       0.067000
57048     57048     shaanxi        108.7167       34.4000          102       155     2012      04        16        107              0.045625      22.350189       1.084525       0.174377       0.143000   -9999.000000       0.077100   -9999.000000
57048     57048     shaanxi        108.7167       34.4000          102       155     2012      04        17        108              0.042292      22.635834       0.236873       0.179751       0.129000   -9999.000000       0.084100       0.042000
57048     57048     shaanxi        108.7167       34.4000          102       155     2012      04        18        109              0.042208      19.929749       0.000000       0.182205       0.149000   -9999.000000   -9999.000000   -9999.000000
57048     57048     shaanxi        108.7167       34.4000          102       155     2012      04        19        110              0.040083      22.651825       2.304241       0.173655       0.146000   -9999.000000   -9999.000000       0.033000
57048     57048     shaanxi        108.7167       34.4000          102       155     2012      04        20        111              0.040042      20.191345       1.617515       0.192737       0.147000   -9999.000000       0.054300       0.121000
57048     57048     shaanxi        108.7167       34.4000          102       155     2012      04        21        112              0.040458      19.960480       0.000000       0.213322       0.163000   -9999.000000       0.087200   -9999.000000
57048     57048     shaanxi        108.7167       34.4000          102       155     2012      04        22        113              0.039458      23.455444       0.000000       0.192800       0.138000   -9999.000000   -9999.000000       0.155000
57048     57048     shaanxi        108.7167       34.4000          102       155     2012      04        23        114              0.039917      25.795593       1.205811       0.177328   -9999.000000   -9999.000000       0.097300   -9999.000000
57048     57048     shaanxi        108.7167       34.4000          102       155     2012      04        24        115              0.066000      23.747498       0.000000       0.182333       0.211000   -9999.000000   -9999.000000       0.364000
57048     57048     shaanxi        108.7167       34.4000          102       155     2012      04        25        116              0.000000      19.666168       0.633887       0.182855       0.155000   -9999.000000       0.106100       0.078000
57048     57048     shaanxi        108.7167       34.4000          102       155     2012      04        26        117              0.060458      21.506836       0.000000       0.171093       0.150500   -9999.000000       0.077300       0.167000
57048     57048     shaanxi        108.7167       34.4000          102       155     2012      04        27        118              0.054417      25.194519       0.000000       0.166455       0.136000   -9999.000000       0.087800       0.104000
57048     57048     shaanxi        108.7167       34.4000          102       155     2012      04        28        119              0.048125      27.329376       3.992847       0.164648   -9999.000000   -9999.000000       0.096100   -9999.000000
57048     57048     shaanxi        108.7167       34.4000          102       155     2012      04        29        120              0.042750      26.829437       0.000000       0.194742       0.175000   -9999.000000       0.092000       0.108000
57048     57048     shaanxi        108.7167       34.4000          102       155     2012      04        30        121              0.038375      25.350250       0.275391       0.201751       0.185500   -9999.000000   -9999.000000       0.369000
57048     57048     shaanxi        108.7167       34.4000          102       155     2012      05        01        122              0.037208      21.458282       0.070371       0.185463       0.195500   -9999.000000       0.114500       0.349000
57048     57048     shaanxi        108.7167       34.4000          102       155     2012      05        02        123              0.037958      19.476379       1.374344       0.183111       0.191000   -9999.000000       0.121400       0.707000
57048     57048     shaanxi        108.7167       34.4000          102       155     2012      05        03        124              0.040000      19.773529       0.533705       0.194531   -9999.000000   -9999.000000       0.102100   -9999.000000
57048     57048     shaanxi        108.7167       34.4000          102       155     2012      05        04        125              0.041083      21.209015       0.000000       0.197307       0.191000   -9999.000000       0.099200       0.199000
57048     57048     shaanxi        108.7167       34.4000          102       155     2012      05        05        126              0.039708      24.984863       0.000000       0.181436       0.182000   -9999.000000   -9999.000000   -9999.000000
57048     57048     shaanxi        108.7167       34.4000          102       155     2012      05        06        127              0.037083      27.636017       0.225504       0.169930       0.161500   -9999.000000   -9999.000000       0.238000
57048     57048     shaanxi        108.7167       34.4000          102       155     2012      05        07        128              0.034917      27.446472       1.066178       0.169050   -9999.000000   -9999.000000       0.076500       0.223000
57048     57048     shaanxi        108.7167       34.4000          102       155     2012      05        08        129              0.035375      25.730469       0.472082       0.178865       0.138000   -9999.000000       0.111900   -9999.000000
57048     57048     shaanxi        108.7167       34.4000          102       155     2012      05        09        130              0.032750      29.430023       0.000000       0.170038   -9999.000000   -9999.000000       0.107600       0.137000
57048     57048     shaanxi        108.7167       34.4000          102       155     2012      05        10        131              0.032375      27.827362      10.887490       0.168908       0.182000   -9999.000000       0.112200   -9999.000000
57048     57048     shaanxi        108.7167       34.4000          102       155     2012      05        11        132              0.045750      29.326202       2.724931       0.187584       0.222500   -9999.000000   -9999.000000       0.530000
57048     57048     shaanxi        108.7167       34.4000          102       155     2012      05        12        133              0.047708      21.241241       0.000000       0.288646       0.194500   -9999.000000       0.123800   -9999.000000
57048     57048     shaanxi        108.7167       34.4000          102       155     2012      05        13        134              0.045042      21.050507       0.441840       0.243151       0.169000   -9999.000000       0.104000   -9999.000000
57048     57048     shaanxi        108.7167       34.4000          102       155     2012      05        14        135              0.044083      19.678131       0.000000       0.228148   -9999.000000   -9999.000000       0.140300       0.072000
57048     57048     shaanxi        108.7167       34.4000          102       155     2012      05        15        136              0.040208      22.857330       0.000000       0.208731       0.200000   -9999.000000       0.129500   -9999.000000
57048     57048     shaanxi        108.7167       34.4000          102       155     2012      05        16        137              0.035417      24.813019       0.000000       0.190598       0.163000   -9999.000000       0.126100       0.298000
57048     57048     shaanxi        108.7167       34.4000          102       155     2012      05        17        138              0.032250      26.503723       0.000000       0.180244       0.156000   -9999.000000   -9999.000000   -9999.000000
57048     57048     shaanxi        108.7167       34.4000          102       155     2012      05        18        139              0.029542      26.872772       0.000000       0.175142       0.159000   -9999.000000       0.121200       0.303000
57048     57048     shaanxi        108.7167       34.4000          102       155     2012      05        19        140              0.027625      27.957947       2.175854       0.172603   -9999.000000   -9999.000000       0.130700       0.366000
57048     57048     shaanxi        108.7167       34.4000          102       155     2012      05        20        141              0.024875      30.005096       0.269162       0.170503   -9999.000000   -9999.000000       0.117000   -9999.000000
57048     57048     shaanxi        108.7167       34.4000          102       155     2012      05        21        142              0.095583      27.664856      14.844419       0.170705       0.265500   -9999.000000       0.173900       0.799000
57048     57048     shaanxi        108.7167       34.4000          102       155     2012      05        22        143              0.158667      19.526550       0.177084       0.285521       0.216000   -9999.000000   -9999.000000   -9999.000000
57048     57048     shaanxi        108.7167       34.4000          102       155     2012      05        23        144              0.142917      20.493896       0.368622       0.275025   -9999.000000   -9999.000000       0.159900       0.592000
57048     57048     shaanxi        108.7167       34.4000          102       155     2012      05        24        145              0.133500      20.308167       0.406765       0.254627       0.227000   -9999.000000       0.105000       0.482000
57048     57048     shaanxi        108.7167       34.4000          102       155     2012      05        25        146              0.000000      19.429932       0.925088       0.243624       0.215000   -9999.000000       0.148300       0.386000
57048     57048     shaanxi        108.7167       34.4000          102       155     2012      05        26        147              0.104583      22.967682       1.316410       0.225204       0.197000   -9999.000000       0.128700       0.306000
57048     57048     shaanxi        108.7167       34.4000          102       155     2012      05        27        148              0.083875      26.590759       0.000000       0.213680       0.172500   -9999.000000       0.127600   -9999.000000
57048     57048     shaanxi        108.7167       34.4000          102       155     2012      05        28        149              0.111917      28.783447      16.948929       0.194169       0.270000   -9999.000000   -9999.000000       0.880000
57048     57048     shaanxi        108.7167       34.4000          102       155     2012      05        29        150              0.161583      21.758392       0.792630       0.273972       0.198000   -9999.000000       0.148300       0.454000
57048     57048     shaanxi        108.7167       34.4000          102       155     2012      05        30        151              0.134958      24.260529       0.000000       0.282925   -9999.000000   -9999.000000       0.118400   -9999.000000
57048     57048     shaanxi        108.7167       34.4000          102       155     2012      05        31        152              0.108292      25.826508       0.000000       0.249179       0.203000   -9999.000000       0.126900   -9999.000000
57048     57048     shaanxi        108.7167       34.4000          102       155     2012      06        01        153              0.090083      23.407257       0.000000       0.235460       0.122500   -9999.000000       0.132300   -9999.000000
57048     57048     shaanxi        108.7167       34.4000          102       155     2012      06        02        154              0.071208      26.729095       0.000000       0.214549       0.138000   -9999.000000   -9999.000000       0.483000
57048     57048     shaanxi        108.7167       34.4000          102       155     2012      06        03        155              0.058542      27.464233       0.000000       0.199088       0.132000   -9999.000000   -9999.000000   -9999.000000
57048     57048     shaanxi        108.7167       34.4000          102       155     2012      06        04        156              0.050458      26.768158       0.000000       0.192291   -9999.000000   -9999.000000       0.176900       0.417000
57048     57048     shaanxi        108.7167       34.4000          102       155     2012      06        05        157              0.043875      28.855774       1.086914       0.185229       0.170000   -9999.000000       0.213600       0.441000
57048     57048     shaanxi        108.7167       34.4000          102       155     2012      06        06        158              0.041375      24.808533       0.000000       0.196553       0.138000   -9999.000000       0.194300   -9999.000000
57048     57048     shaanxi        108.7167       34.4000          102       155     2012      06        07        159              0.037083      26.905609       0.000000       0.189921       0.140500   -9999.000000       0.203700       0.397000
57048     57048     shaanxi        108.7167       34.4000          102       155     2012      06        08        160              0.032542      30.363800       1.396138       0.178311       0.137000   -9999.000000   -9999.000000   -9999.000000
57048     57048     shaanxi        108.7167       34.4000          102       155     2012      06        09        161              0.029750      29.284973       0.000000       0.174807       0.119000   -9999.000000       0.208800       0.423000
57048     57048     shaanxi        108.7167       34.4000          102       155     2012      06        10        162              0.026125      32.350311       0.000000       0.170817       0.143000   -9999.000000       0.139100   -9999.000000
57048     57048     shaanxi        108.7167       34.4000          102       155     2012      06        11        163              0.000000      32.471283       0.000000       0.168942       0.118500   -9999.000000       0.166400   -9999.000000
57048     57048     shaanxi        108.7167       34.4000          102       155     2012      06        12        164              0.021250      30.693024       0.000000       0.167507       0.127000   -9999.000000       0.162900       0.425000
57048     57048     shaanxi        108.7167       34.4000          102       155     2012      06        13        165              0.019792      32.825592       0.000000       0.165907       0.122000   -9999.000000       0.174100   -9999.000000
57048     57048     shaanxi        108.7167       34.4000          102       155     2012      06        14        166              0.017375      34.610870       0.000000       0.165115       0.125000   -9999.000000   -9999.000000       0.437000
57048     57048     shaanxi        108.7167       34.4000          102       155     2012      06        15        167              0.016375      30.403656       0.000000       0.164403       0.138000   -9999.000000       0.177000   -9999.000000
57048     57048     shaanxi        108.7167       34.4000          102       155     2012      06        16        168              0.015708      31.361115       0.000000       0.163999       0.126000   -9999.000000       0.172700       0.393000
57048     57048     shaanxi        108.7167       34.4000          102       155     2012      06        17        169              0.014875      32.150513       0.000000       0.162967       0.133500   -9999.000000       0.163900       0.516000
57048     57048     shaanxi        108.7167       34.4000          102       155     2012      06        18        170              0.013875      33.429504       1.309686       0.162671       0.158500   -9999.000000       0.150200   -9999.000000
57048     57048     shaanxi        108.7167       34.4000          102       155     2012      06        19        171              0.013708      31.746979       0.534040       0.171999       0.130000   -9999.000000   -9999.000000       0.409000
57048     57048     shaanxi        108.7167       34.4000          102       155     2012      06        20        172              0.013417      29.263916       0.000000       0.171585   -9999.000000   -9999.000000   -9999.000000   -9999.000000
57048     57048     shaanxi        108.7167       34.4000          102       155     2012      06        21        173              0.082958      32.728760       4.012254       0.164397       0.155000   -9999.000000       0.154600       0.352000
57048     57048     shaanxi        108.7167       34.4000          102       155     2012      06        22        174              0.092667      33.650146       0.000000       0.186397       0.127000   -9999.000000       0.159200       0.536000
57048     57048     shaanxi        108.7167       34.4000          102       155     2012      06        23        175              0.092417      32.146698       3.869656       0.190796       0.119000   -9999.000000       0.156500       0.489000
57048     57048     shaanxi        108.7167       34.4000          102       155     2012      06        24        176              0.095083      33.402191       0.354297       0.189414       0.126000   -9999.000000       0.169300       0.574000
57048     57048     shaanxi        108.7167       34.4000          102       155     2012      06        25        177              0.095833      30.596954       4.699150       0.204024   -9999.000000   -9999.000000   -9999.000000   -9999.000000
57048     57048     shaanxi        108.7167       34.4000          102       155     2012      06        26        178              0.096625      26.451508       0.320114       0.242486       0.179000   -9999.000000       0.173000       0.637000
57048     57048     shaanxi        108.7167       34.4000          102       155     2012      06        27        179              0.097667      25.837006       0.569368       0.221272       0.151000   -9999.000000       0.125600       0.615000
57048     57048     shaanxi        108.7167       34.4000          102       155     2012      06        28        180              0.096042      27.142303       0.791286       0.201464       0.140500   -9999.000000       0.183700       0.478000
57048     57048     shaanxi        108.7167       34.4000          102       155     2012      06        29        181              0.174833      27.710205      14.729984       0.192302       0.191000   -9999.000000       0.200500   -9999.000000
57048     57048     shaanxi        108.7167       34.4000          102       155     2012      06        30        182              0.180417      24.674103       0.086660       0.307314       0.162000   -9999.000000       0.168300   -9999.000000
57048     57048     shaanxi        108.7167       34.4000          102       155     2012      07        01        183              0.163375      28.508636       0.796658       0.252994   -9999.000000   -9999.000000   -9999.000000       0.565000
57048     57048     shaanxi        108.7167       34.4000          102       155     2012      07        02        184              0.259750      30.891388       6.027312       0.223582       0.187000   -9999.000000       0.168800   -9999.000000
57048     57048     shaanxi        108.7167       34.4000          102       155     2012      07        03        185              0.254042      24.374390       0.474407       0.274875       0.143000   -9999.000000       0.150700       0.619000
57048     57048     shaanxi        108.7167       34.4000          102       155     2012      07        04        186              0.283667      29.999573       4.078530       0.239389       0.172000   -9999.000000       0.179700       0.790000
57048     57048     shaanxi        108.7167       34.4000          102       155     2012      07        05        187              0.258625      26.499786       0.275738       0.265380       0.141000   -9999.000000       0.162200   -9999.000000
57048     57048     shaanxi        108.7167       34.4000          102       155     2012      07        06        188              0.230000      30.197266       0.000000       0.229677   -9999.000000   -9999.000000   -9999.000000       0.651000
57048     57048     shaanxi        108.7167       34.4000          102       155     2012      07        07        189              0.211625      30.473511       0.847001       0.207460   -9999.000000   -9999.000000   -9999.000000   -9999.000000
57048     57048     shaanxi        108.7167       34.4000          102       155     2012      07        08        190              0.283917      28.823303      19.525322       0.202145       0.194000   -9999.000000       0.138400       1.000000
57048     57048     shaanxi        108.7167       34.4000          102       155     2012      07        09        191              0.311875      25.652557      10.082812       0.316278       0.200000   -9999.000000       0.185800   -9999.000000
57048     57048     shaanxi        108.7167       34.4000          102       155     2012      07        10        192              0.279958      25.074280       0.372201       0.332928       0.158000   -9999.000000       0.166700   -9999.000000
57048     57048     shaanxi        108.7167       34.4000          102       155     2012      07        11        193              0.249042      30.379333       1.020066       0.288349   -9999.000000   -9999.000000       0.155300       0.733000
57048     57048     shaanxi        108.7167       34.4000          102       155     2012      07        12        194              0.216250      30.685516       0.210490       0.262436       0.189000   -9999.000000   -9999.000000   -9999.000000
57048     57048     shaanxi        108.7167       34.4000          102       155     2012      07        13        195              0.197167      31.528076       1.216382       0.240231       0.170500   -9999.000000       0.159600       0.656000
57048     57048     shaanxi        108.7167       34.4000          102       155     2012      07        14        196              0.185958      29.780365       0.268980       0.234201       0.172500   -9999.000000       0.117200   -9999.000000
57048     57048     shaanxi        108.7167       34.4000          102       155     2012      07        15        197              0.173292      28.959442       0.354160       0.223650       0.170000   -9999.000000       0.147100       0.527000
57048     57048     shaanxi        108.7167       34.4000          102       155     2012      07        16        198              0.161125      30.177643       0.721093       0.211291       0.166000   -9999.000000       0.162200       0.683000
57048     57048     shaanxi        108.7167       34.4000          102       155     2012      07        17        199              0.152125      30.198730       0.000000       0.201085       0.182000   -9999.000000       0.145100   -9999.000000
57048     57048     shaanxi        108.7167       34.4000          102       155     2012      07        18        200              0.146208      29.981445       0.000000       0.193110       0.176000   -9999.000000   -9999.000000       0.596000
57048     57048     shaanxi        108.7167       34.4000          102       155     2012      07        19        201              0.141917      31.243591       0.000000       0.187084       0.157500   -9999.000000       0.146600   -9999.000000
57048     57048     shaanxi        108.7167       34.4000          102       155     2012      07        20        202              0.140565      30.997925       0.000000       0.183892       0.177000   -9999.000000       0.147900       0.431000
57048     57048     shaanxi        108.7167       34.4000          102       155     2012      07        21        203              0.140250      31.725250       3.815047       0.181441   -9999.000000   -9999.000000       0.150100       0.806000
57048     57048     shaanxi        108.7167       34.4000          102       155     2012      07        22        204              0.145083      27.985748       0.881149       0.213933   -9999.000000   -9999.000000       0.148100       0.665000
57048     57048     shaanxi        108.7167       34.4000          102       155     2012      07        23        205              0.141292      30.697571       1.535197       0.205044   -9999.000000   -9999.000000   -9999.000000       0.738000
57048     57048     shaanxi        108.7167       34.4000          102       155     2012      07        24        206              0.142250      27.161499       1.556841       0.204296       0.180500   -9999.000000   -9999.000000   -9999.000000
57048     57048     shaanxi        108.7167       34.4000          102       155     2012      07        25        207              0.141667      29.743561       0.649690       0.200520       0.172500   -9999.000000       0.099700       0.486000
57048     57048     shaanxi        108.7167       34.4000          102       155     2012      07        26        208              0.140542      31.211487       0.000000       0.193519       0.177000       0.113600       0.130600       0.632000
57048     57048     shaanxi        108.7167       34.4000          102       155     2012      07        27        209              0.136958      35.015625       0.788666       0.181032       0.160000   -9999.000000       0.122600       0.545000
57048     57048     shaanxi        108.7167       34.4000          102       155     2012      07        28        210              0.133542      35.650452       1.081001       0.174643       0.191000   -9999.000000       0.122200       0.501000
57048     57048     shaanxi        108.7167       34.4000          102       155     2012      07        29        211              0.130250      37.007965       0.000000       0.170722       0.165500   -9999.000000   -9999.000000   -9999.000000
57048     57048     shaanxi        108.7167       34.4000          102       155     2012      07        30        212              0.129500      37.596313       0.255933       0.168603       0.195500   -9999.000000       0.110000       0.539000
57048     57048     shaanxi        108.7167       34.4000          102       155     2012      07        31        213              0.132208      34.115875       0.362411       0.169802       0.195000   -9999.000000       0.090600   -9999.000000
57048     57048     shaanxi        108.7167       34.4000          102       155     2012      08        01        214              0.130750      30.691925       0.284904       0.169294       0.186000   -9999.000000       0.114900       0.573000
57048     57048     shaanxi        108.7167       34.4000          102       155     2012      08        02        215              0.131375      29.258606       0.740583       0.169619       0.234000   -9999.000000       0.101800       0.384000
57048     57048     shaanxi        108.7167       34.4000          102       155     2012      08        03        216              0.129833      31.914368       0.866266       0.167378       0.226000   -9999.000000   -9999.000000   -9999.000000
57048     57048     shaanxi        108.7167       34.4000          102       155     2012      08        04        217              0.127333      33.040314       0.000000       0.165774       0.188000   -9999.000000   -9999.000000       0.529000
57048     57048     shaanxi        108.7167       34.4000          102       155     2012      08        05        218              0.123667      33.078430       1.759381       0.164348       0.210500   -9999.000000       0.098000   -9999.000000
57048     57048     shaanxi        108.7167       34.4000          102       155     2012      08        06        219              0.121875      31.044983       1.002866       0.169852       0.199000   -9999.000000       0.088800       0.555000
57048     57048     shaanxi        108.7167       34.4000          102       155     2012      08        07        220              0.120292      31.707855       0.300276       0.169427   -9999.000000   -9999.000000       0.079900   -9999.000000
57048     57048     shaanxi        108.7167       34.4000          102       155     2012      08        08        221              0.117917      34.011505       1.917640       0.164521       0.225000       0.130400       0.086100   -9999.000000
57048     57048     shaanxi        108.7167       34.4000          102       155     2012      08        09        222              0.116333      32.472290       0.492022       0.181424       0.233000   -9999.000000   -9999.000000       0.553000
57048     57048     shaanxi        108.7167       34.4000          102       155     2012      08        10        223              0.115000      31.652374       0.000000       0.177735       0.213000   -9999.000000   -9999.000000   -9999.000000
57048     57048     shaanxi        108.7167       34.4000          102       155     2012      08        11        224              0.113333      32.345490       0.777934       0.168956       0.204000   -9999.000000       0.055000       0.524000
57048     57048     shaanxi        108.7167       34.4000          102       155     2012      08        12        225              0.111792      34.210449       3.759360       0.164212       0.187000   -9999.000000       0.100100   -9999.000000
57048     57048     shaanxi        108.7167       34.4000          102       155     2012      08        13        226              0.109542      31.492035       0.931847       0.193136       0.246000   -9999.000000       0.119700       0.751000
57048     57048     shaanxi        108.7167       34.4000          102       155     2012      08        14        227              0.109375      26.033356       1.304778       0.209654       0.284000   -9999.000000       0.112100       0.668000
57048     57048     shaanxi        108.7167       34.4000          102       155     2012      08        15        228              0.110458      25.954987       0.000000       0.208451       0.224000   -9999.000000   -9999.000000   -9999.000000
57048     57048     shaanxi        108.7167       34.4000          102       155     2012      08        16        229              0.111875      28.837128       0.000000       0.188486       0.225500   -9999.000000       0.105900       0.532000
57048     57048     shaanxi        108.7167       34.4000          102       155     2012      08        17        230              0.112542      30.565277      15.090361       0.175849       0.204000   -9999.000000       0.114100   -9999.000000
57048     57048     shaanxi        108.7167       34.4000          102       155     2012      08        18        231              0.126833      29.604218       3.377374       0.231808   -9999.000000       0.208500       0.136600       0.966000
57048     57048     shaanxi        108.7167       34.4000          102       155     2012      08        19        232              0.218750      24.415771      18.767826       0.293007       0.283000   -9999.000000       0.140200       0.917000
57048     57048     shaanxi        108.7167       34.4000          102       155     2012      08        20        233              0.236917      22.807465       0.283904       0.336721       0.282000   -9999.000000   -9999.000000       0.769000
57048     57048     shaanxi        108.7167       34.4000          102       155     2012      08        21        234              0.213792      23.905792       3.655968       0.302332       0.222000   -9999.000000   -9999.000000       0.990000
57048     57048     shaanxi        108.7167       34.4000          102       155     2012      08        22        235              0.183750      24.998016       0.000000       0.277626       0.193000   -9999.000000       0.105400   -9999.000000
57048     57048     shaanxi        108.7167       34.4000          102       155     2012      08        23        236              0.160458      25.531616       0.000000       0.254892       0.181000       0.186900       0.128400       0.522000
57048     57048     shaanxi        108.7167       34.4000          102       155     2012      08        24        237              0.146375      25.726257       0.000000       0.236723   -9999.000000   -9999.000000       0.109400   -9999.000000
57048     57048     shaanxi        108.7167       34.4000          102       155     2012      08        25        238              0.000000      27.014191       2.869282       0.221336   -9999.000000       0.146500       0.114400   -9999.000000
57048     57048     shaanxi        108.7167       34.4000          102       155     2012      08        26        239              0.139417      27.536102       0.000000       0.222238       0.209500       0.217700   -9999.000000       0.569000
57048     57048     shaanxi        108.7167       34.4000          102       155     2012      08        27        240              0.136625      26.826416       0.768717       0.234561       0.236000   -9999.000000       0.140700   -9999.000000
57048     57048     shaanxi        108.7167       34.4000          102       155     2012      08        28        241              0.132917      27.297638       0.000000       0.220450       0.183000   -9999.000000       0.092800       0.628000
57048     57048     shaanxi        108.7167       34.4000          102       155     2012      08        29        242              0.128750      28.931488       0.000000       0.205503       0.201000   -9999.000000       0.120100   -9999.000000
57048     57048     shaanxi        108.7167       34.4000          102       155     2012      08        30        243              0.128625      30.673950      10.329316       0.190792   -9999.000000   -9999.000000       0.104700       0.565000
57048     57048     shaanxi        108.7167       34.4000          102       155     2012      08        31        244              0.286833      30.202057      30.916538       0.212113   -9999.000000       0.083000       0.137400       1.000000
57048     57048     shaanxi        108.7167       34.4000          102       155     2012      09        01        245              0.304167      22.455750      18.943110       0.360328       0.257000   -9999.000000   -9999.000000   -9999.000000
57048     57048     shaanxi        108.7167       34.4000          102       155     2012      09        02        246              0.272875      20.312775       0.000000       0.368563       0.224000   -9999.000000       0.143500       0.741000
57048     57048     shaanxi        108.7167       34.4000          102       155     2012      09        03        247              0.248833      23.115631       0.000000       0.330215   -9999.000000   -9999.000000       0.128800   -9999.000000
57048     57048     shaanxi        108.7167       34.4000          102       155     2012      09        04        248              0.223542      24.708984       0.000000       0.311337       0.223000   -9999.000000       0.112400       0.664000
57048     57048     shaanxi        108.7167       34.4000          102       155     2012      09        05        249              0.202667      25.089142       0.000000       0.296751       0.185500       0.064700       0.114000   -9999.000000
57048     57048     shaanxi        108.7167       34.4000          102       155     2012      09        06        250              0.186083      26.371216       1.002384       0.283659       0.191500   -9999.000000   -9999.000000   -9999.000000
57048     57048     shaanxi        108.7167       34.4000          102       155     2012      09        07        251              0.242250      25.415955      39.229713       0.273506       0.205000   -9999.000000   -9999.000000       1.000000
57048     57048     shaanxi        108.7167       34.4000          102       155     2012      09        08        252              0.314125      23.956512       3.220439       0.337873       0.278000   -9999.000000       0.101800   -9999.000000
57048     57048     shaanxi        108.7167       34.4000          102       155     2012      09        09        253              0.285208      22.688324       0.000000       0.363272       0.221000   -9999.000000       0.132100       0.769000
57048     57048     shaanxi        108.7167       34.4000          102       155     2012      09        10        254              0.304875      23.525238      26.929516       0.338619       0.277000       0.101900       0.169300   -9999.000000
57048     57048     shaanxi        108.7167       34.4000          102       155     2012      09        11        255              0.292083      20.078064       0.222246       0.383897       0.197000   -9999.000000       0.150200       0.999000
57048     57048     shaanxi        108.7167       34.4000          102       155     2012      09        12        256              0.254250      22.390259       0.000000       0.354204       0.219000       0.151000   -9999.000000       0.597000
57048     57048     shaanxi        108.7167       34.4000          102       155     2012      09        13        257              0.249500      19.567139       0.000000       0.340424       0.164000   -9999.000000       0.137100   -9999.000000
57048     57048     shaanxi        108.7167       34.4000          102       155     2012      09        14        258              0.227417      19.600769       0.000000       0.329344   -9999.000000   -9999.000000       0.085600       0.591000
57048     57048     shaanxi        108.7167       34.4000          102       155     2012      09        15        259              0.213833      20.620605       7.987678       0.320521       0.229000   -9999.000000       0.155800   -9999.000000
57048     57048     shaanxi        108.7167       34.4000          102       155     2012      09        16        260              0.216292      20.039703       0.136269       0.335025       0.204000   -9999.000000       0.153600       0.790000
57048     57048     shaanxi        108.7167       34.4000          102       155     2012      09        17        261              0.211833      18.278473       0.000000       0.332652       0.192500   -9999.000000       0.127400       0.714000
57048     57048     shaanxi        108.7167       34.4000          102       155     2012      09        18        262              0.199583      20.930054       0.122389       0.322232       0.171000   -9999.000000   -9999.000000       0.709000
57048     57048     shaanxi        108.7167       34.4000          102       155     2012      09        19        263              0.187333      22.217255       0.000000       0.314331       0.155000   -9999.000000       0.119300       0.635000
57048     57048     shaanxi        108.7167       34.4000          102       155     2012      09        20        264              0.187083      22.845367       2.430238       0.305986       0.227000   -9999.000000       0.136600   -9999.000000
57048     57048     shaanxi        108.7167       34.4000          102       155     2012      09        21        265              0.202625      20.255615       0.000000       0.313833   -9999.000000   -9999.000000       0.119600       0.658000
57048     57048     shaanxi        108.7167       34.4000          102       155     2012      09        22        266              0.198250      21.400543       0.000000       0.309212       0.153500   -9999.000000       0.121900       0.627000
57048     57048     shaanxi        108.7167       34.4000          102       155     2012      09        23        267              0.192333      21.541840       0.000000       0.304007       0.158500   -9999.000000   -9999.000000       0.626000
57048     57048     shaanxi        108.7167       34.4000          102       155     2012      09        24        268              0.184917      22.062775       0.954985       0.299190       0.144000   -9999.000000   -9999.000000       0.596000
57048     57048     shaanxi        108.7167       34.4000          102       155     2012      09        25        269              0.218167      22.087158       7.818132       0.294563   -9999.000000   -9999.000000       0.112500   -9999.000000
57048     57048     shaanxi        108.7167       34.4000          102       155     2012      09        26        270              0.237000      19.220978       0.000000       0.328087       0.182000   -9999.000000       0.165600       0.648000
57048     57048     shaanxi        108.7167       34.4000          102       155     2012      09        27        271              0.229500      19.729401       4.591941       0.314401       0.147500   -9999.000000       0.141400   -9999.000000
57048     57048     shaanxi        108.7167       34.4000          102       155     2012      09        28        272              0.201000      20.278351       0.542431       0.304134       0.143500   -9999.000000       0.141000       0.608000
57048     57048     shaanxi        108.7167       34.4000          102       155     2012      09        29        273              0.193042      18.057648       0.000000       0.294951       0.141000   -9999.000000   -9999.000000       0.431000
57048     57048     shaanxi        108.7167       34.4000          102       155     2012      09        30        274              0.182750      19.055359       0.000000       0.289281   -9999.000000   -9999.000000       0.141600   -9999.000000
57048     57048     shaanxi        108.7167       34.4000          102       155     2012      10        01        275              0.173583      19.549561       0.000000       0.283496       0.146000   -9999.000000       0.086600       0.615000
57048     57048     shaanxi        108.7167       34.4000          102       155     2012      10        02        276              0.174292      20.163849       1.647509       0.277378       0.181000   -9999.000000       0.119800   -9999.000000
57048     57048     shaanxi        108.7167       34.4000          102       155     2012      10        03        277              0.183750      18.163513       0.000000       0.287931       0.143000       0.144300       0.119600       0.684000
57048     57048     shaanxi        108.7167       34.4000          102       155     2012      10        04        278              0.179667      20.684692       0.807605       0.282670       0.144000   -9999.000000       0.112900   -9999.000000
57048     57048     shaanxi        108.7167       34.4000          102       155     2012      10        05        279              0.176333      19.194000       0.000000       0.278674       0.143000   -9999.000000   -9999.000000   -9999.000000
57048     57048     shaanxi        108.7167       34.4000          102       155     2012      10        06        280              0.171958      19.985138       0.746914       0.273218       0.150000       0.187300       0.099700       0.618000
57048     57048     shaanxi        108.7167       34.4000          102       155     2012      10        07        281              0.169917      18.519745       0.000000       0.270243       0.162000   -9999.000000       0.110400   -9999.000000
57048     57048     shaanxi        108.7167       34.4000          102       155     2012      10        08        282              0.170208      17.542328       1.543167       0.270200       0.171000   -9999.000000       0.114800       0.775000
57048     57048     shaanxi        108.7167       34.4000          102       155     2012      10        09        283              0.169125      16.826324       0.000000       0.281114       0.150000   -9999.000000       0.105400   -9999.000000
57048     57048     shaanxi        108.7167       34.4000          102       155     2012      10        10        284              0.164417      18.375000       0.000000       0.271438       0.132000   -9999.000000   -9999.000000       0.564000
57048     57048     shaanxi        108.7167       34.4000          102       155     2012      10        11        285              0.160750      18.457703       0.000000       0.264488   -9999.000000       0.065200       0.106500       0.595000
57048     57048     shaanxi        108.7167       34.4000          102       155     2012      10        12        286              0.158750      17.990021       0.000000       0.262532       0.122000   -9999.000000       0.065200   -9999.000000
57048     57048     shaanxi        108.7167       34.4000          102       155     2012      10        13        287              0.156292      18.358032       0.137929       0.261972       0.111000   -9999.000000       0.107900       0.630000
57048     57048     shaanxi        108.7167       34.4000          102       155     2012      10        14        288              0.152208      19.566345       0.000000       0.256394       0.118500   -9999.000000       0.098800   -9999.000000
57048     57048     shaanxi        108.7167       34.4000          102       155     2012      10        15        289              0.151500      17.946259       2.255463       0.252336       0.120000       0.120600       0.114700       0.391000
57048     57048     shaanxi        108.7167       34.4000          102       155     2012      10        16        290              0.167750      16.208252       0.649426       0.259096       0.119000   -9999.000000   -9999.000000       0.551000
57048     57048     shaanxi        108.7167       34.4000          102       155     2012      10        17        291              0.163958      14.412140       0.000000       0.271798       0.123000   -9999.000000       0.111900       0.551000
57048     57048     shaanxi        108.7167       34.4000          102       155     2012      10        18        292              0.160875      14.560150       0.000000       0.259043       0.119000   -9999.000000       0.098600       0.458000
57048     57048     shaanxi        108.7167       34.4000          102       155     2012      10        19        293              0.159750      12.767731       0.000000       0.258253       0.116000       0.199800       0.101600   -9999.000000
57048     57048     shaanxi        108.7167       34.4000          102       155     2012      10        20        294              0.157458      15.869507       0.000000       0.254761       0.129000   -9999.000000       0.113600       0.436000
57048     57048     shaanxi        108.7167       34.4000          102       155     2012      10        21        295              0.153833      17.455170       1.076915       0.250393   -9999.000000       0.067500   -9999.000000       0.600000
57048     57048     shaanxi        108.7167       34.4000          102       155     2012      10        22        296              0.151750      12.526459       0.000000       0.259976   -9999.000000   -9999.000000   -9999.000000       0.616000
57048     57048     shaanxi        108.7167       34.4000          102       155     2012      10        23        297              0.148292      13.610962       0.231656       0.252785   -9999.000000   -9999.000000       0.104200       0.544000
57048     57048     shaanxi        108.7167       34.4000          102       155     2012      10        24        298              0.149208      10.414764       0.000000       0.254651   -9999.000000       0.153400       0.122700   -9999.000000
57048     57048     shaanxi        108.7167       34.4000          102       155     2012      10        25        299              0.000000      13.798492       0.000000       0.250611       0.140000   -9999.000000       0.105700       0.460000
57048     57048     shaanxi        108.7167       34.4000          102       155     2012      10        26        300              0.146750      14.880341       0.000000       0.246282       0.129000   -9999.000000       0.114700   -9999.000000
57048     57048     shaanxi        108.7167       34.4000          102       155     2012      10        27        301              0.144000      15.730957       0.000000       0.242373   -9999.000000   -9999.000000   -9999.000000       0.488000
57048     57048     shaanxi        108.7167       34.4000          102       155     2012      10        28        302              0.000000      15.380188       0.343934       0.238891       0.167000   -9999.000000       0.131900       0.387000
57048     57048     shaanxi        108.7167       34.4000          102       155     2012      10        29        303              0.143792      14.569489       0.203935       0.239183       0.136000       0.030100       0.073300   -9999.000000
57048     57048     shaanxi        108.7167       34.4000          102       155     2012      10        30        304              0.141542      14.191101       0.205671       0.242127       0.119000   -9999.000000       0.113300       0.405000
57048     57048     shaanxi        108.7167       34.4000          102       155     2012      10        31        305              0.139125      12.715454       0.000000       0.236385       0.128000   -9999.000000       0.101300   -9999.000000
57048     57048     shaanxi        108.7167       34.4000          102       155     2012      11        01        306              0.136917      12.468750       0.000000       0.231951       0.119000   -9999.000000       0.104600       0.522000
57048     57048     shaanxi        108.7167       34.4000          102       155     2012      11        02        307              0.136458      11.730927       0.000000       0.230199       0.148000   -9999.000000   -9999.000000   -9999.000000
57048     57048     shaanxi        108.7167       34.4000          102       155     2012      11        03        308              0.133125      13.214874       0.000000       0.227565   -9999.000000   -9999.000000       0.102500   -9999.000000
57048     57048     shaanxi        108.7167       34.4000          102       155     2012      11        04        309              0.130833       8.537598       0.000000       0.223396       0.112000   -9999.000000       0.111300       0.331000
57048     57048     shaanxi        108.7167       34.4000          102       155     2012      11        05        310              0.129375       7.971008       0.000000       0.221399       0.123000   -9999.000000       0.086700   -9999.000000
57048     57048     shaanxi        108.7167       34.4000          102       155     2012      11        06        311              0.129125       8.046326       0.000000       0.220579       0.125000   -9999.000000       0.098300       0.464000
57048     57048     shaanxi        108.7167       34.4000          102       155     2012      11        07        312              0.128125       9.437073       9.029495       0.220515   -9999.000000   -9999.000000   -9999.000000   -9999.000000
57048     57048     shaanxi        108.7167       34.4000          102       155     2012      11        08        313              0.128458       8.066711       0.000000       0.223997       0.139000   -9999.000000   -9999.000000       0.399000
57048     57048     shaanxi        108.7167       34.4000          102       155     2012      11        09        314              0.128208      10.127960       0.306636       0.223804       0.153500   -9999.000000       0.084200       0.489000
57048     57048     shaanxi        108.7167       34.4000          102       155     2012      11        10        315              0.127708       8.849487       0.000000       0.226558       0.120000   -9999.000000       0.103700   -9999.000000
57048     57048     shaanxi        108.7167       34.4000          102       155     2012      11        11        316              0.127792       6.248901       0.000000       0.225775       0.129000   -9999.000000       0.092300       0.333000
57048     57048     shaanxi        108.7167       34.4000          102       155     2012      11        12        317              0.127875       6.847748       0.000000       0.223218       0.128000   -9999.000000       0.084200   -9999.000000
57048     57048     shaanxi        108.7167       34.4000          102       155     2012      11        13        318              0.000000       8.097046       0.000000       0.222023   -9999.000000   -9999.000000   -9999.000000       0.238000
57048     57048     shaanxi        108.7167       34.4000          102       155     2012      11        14        319              0.127000       8.342194       0.552813       0.220360       0.143000   -9999.000000       0.086500       0.425000
57048     57048     shaanxi        108.7167       34.4000          102       155     2012      11        15        320              0.126083       7.733307       0.507462       0.220179   -9999.000000   -9999.000000       0.068000       0.321000
57048     57048     shaanxi        108.7167       34.4000          102       155     2012      11        16        321              0.127208       5.505219       0.000000       0.229616       0.137000   -9999.000000       0.093700       0.354000
57048     57048     shaanxi        108.7167       34.4000          102       155     2012      11        17        322              0.000000       7.696594       0.000000       0.227741       0.127000   -9999.000000       0.084000   -9999.000000
57048     57048     shaanxi        108.7167       34.4000          102       155     2012      11        18        323              0.127250       7.950684       0.000000       0.225014   -9999.000000   -9999.000000       0.083200       0.214000
57048     57048     shaanxi        108.7167       34.4000          102       155     2012      11        19        324              0.126792       8.903839       0.000000       0.222776       0.152000   -9999.000000   -9999.000000       0.398000
57048     57048     shaanxi        108.7167       34.4000          102       155     2012      11        20        325              0.126292       7.944977       0.000000       0.221744       0.127000   -9999.000000       0.070500       0.336000
57048     57048     shaanxi        108.7167       34.4000          102       155     2012      11        21        326              0.127000       6.791687       0.000000       0.223702       0.120500   -9999.000000       0.078900       0.333000
57048     57048     shaanxi        108.7167       34.4000          102       155     2012      11        22        327              0.125875       8.891937       0.000000       0.223653       0.123000   -9999.000000       0.068900   -9999.000000
57048     57048     shaanxi        108.7167       34.4000          102       155     2012      11        23        328              0.124208       7.090820       0.000000       0.221504   -9999.000000   -9999.000000       0.071400       0.194000
57048     57048     shaanxi        108.7167       34.4000          102       155     2012      11        24        329              0.123417       6.070618       0.674740       0.217375   -9999.000000   -9999.000000   -9999.000000   -9999.000000
57048     57048     shaanxi        108.7167       34.4000          102       155     2012      11        25        330              0.141875       4.615845       0.579181       0.219623   -9999.000000   -9999.000000       0.076000       0.526000
57048     57048     shaanxi        108.7167       34.4000          102       155     2012      11        26        331              0.144667       4.115997       0.000000       0.225887       0.126000   -9999.000000   -9999.000000       0.295000
57048     57048     shaanxi        108.7167       34.4000          102       155     2012      11        27        332              0.145000       4.473114       0.000000       0.221036       0.134000   -9999.000000       0.069500   -9999.000000
57048     57048     shaanxi        108.7167       34.4000          102       155     2012      11        28        333              0.143750       5.271362       0.000000       0.222195   -9999.000000   -9999.000000       0.062000       0.119000
57048     57048     shaanxi        108.7167       34.4000          102       155     2012      11        29        334              0.141958       2.706268       0.000000       0.213704   -9999.000000   -9999.000000       0.064900   -9999.000000
57048     57048     shaanxi        108.7167       34.4000          102       155     2012      11        30        335              0.141875       1.815552       0.000000       0.208687   -9999.000000   -9999.000000   -9999.000000       0.423000
57048     57048     shaanxi        108.7167       34.4000          102       155     2012      12        01        336              0.142833       2.305603       0.083042       0.214053   -9999.000000   -9999.000000       0.071400   -9999.000000
57048     57048     shaanxi        108.7167       34.4000          102       155     2012      12        02        337              0.142292       2.471436       0.000000       0.216843   -9999.000000   -9999.000000       0.055100   -9999.000000
57048     57048     shaanxi        108.7167       34.4000          102       155     2012      12        03        338              0.142125       2.015259       0.000000       0.218577       0.134000   -9999.000000       0.072400       0.232000
57048     57048     shaanxi        108.7167       34.4000          102       155     2012      12        04        339              0.141167       3.741302       0.000000       0.215751   -9999.000000   -9999.000000       0.064100   -9999.000000
57048     57048     shaanxi        108.7167       34.4000          102       155     2012      12        05        340              0.140792       4.990143       0.000000       0.218326   -9999.000000   -9999.000000   -9999.000000       0.233000
57048     57048     shaanxi        108.7167       34.4000          102       155     2012      12        06        341              0.139875       4.364197       0.000000       0.213471       0.121000   -9999.000000   -9999.000000   -9999.000000
57048     57048     shaanxi        108.7167       34.4000          102       155     2012      12        07        342              0.138792       4.938965       0.000000       0.215027       0.122000   -9999.000000       0.047400       0.247000
57048     57048     shaanxi        108.7167       34.4000          102       155     2012      12        08        343              0.136667       5.101471       0.000000       0.212732       0.126000   -9999.000000       0.062800       0.170000
57048     57048     shaanxi        108.7167       34.4000          102       155     2012      12        09        344              0.135042       2.326447       0.000000       0.204103   -9999.000000       0.021500       0.054500   -9999.000000
57048     57048     shaanxi        108.7167       34.4000          102       155     2012      12        10        345              0.133625       1.538574       0.000000       0.201543   -9999.000000   -9999.000000       0.056600       0.209000
57048     57048     shaanxi        108.7167       34.4000          102       155     2012      12        11        346              0.132375       2.317841       0.000000       0.203694   -9999.000000   -9999.000000   -9999.000000   -9999.000000
57048     57048     shaanxi        108.7167       34.4000          102       155     2012      12        12        347              0.132667       0.752319       0.000000       0.199032   -9999.000000   -9999.000000       0.066300       0.018000
57048     57048     shaanxi        108.7167       34.4000          102       155     2012      12        13        348              0.132750       0.706879       0.000000       0.200058   -9999.000000   -9999.000000       0.021600       0.334000
57048     57048     shaanxi        108.7167       34.4000          102       155     2012      12        14        349              0.132542       0.302063       0.000000       0.201691       0.116000   -9999.000000       0.067300       0.155000
57048     57048     shaanxi        108.7167       34.4000          102       155     2012      12        15        350              0.000000       1.320404       0.000000       0.206876   -9999.000000   -9999.000000       0.062400       0.318000
57048     57048     shaanxi        108.7167       34.4000          102       155     2012      12        16        351              0.132583       0.777924       0.000000       0.207525       0.135000   -9999.000000       0.059300   -9999.000000
57048     57048     shaanxi        108.7167       34.4000          102       155     2012      12        17        352              0.132167       1.705536       0.000000       0.213311       0.102000   -9999.000000   -9999.000000       0.234000
57048     57048     shaanxi        108.7167       34.4000          102       155     2012      12        18        353              0.130875       2.197937       0.000000       0.212624       0.106000   -9999.000000       0.055900       0.119000
57048     57048     shaanxi        108.7167       34.4000          102       155     2012      12        19        354              0.130583       1.664337       0.000000       0.206913       0.116000   -9999.000000       0.057100       0.131000
57048     57048     shaanxi        108.7167       34.4000          102       155     2012      12        20        355              0.000000       1.185608       0.150205       0.207468   -9999.000000   -9999.000000       0.052600       0.352000
57048     57048     shaanxi        108.7167       34.4000          102       155     2012      12        21        356              0.130375      -0.181396       0.123295       0.201478   -9999.000000   -9999.000000       0.056200   -9999.000000
57048     57048     shaanxi        108.7167       34.4000          102       155     2012      12        22        357              0.129333       0.795563       0.000000       0.205356   -9999.000000       0.047900   -9999.000000       0.085000
57048     57048     shaanxi        108.7167       34.4000          102       155     2012      12        23        358              0.125833      -0.529846       0.000000       0.196866   -9999.000000   -9999.000000   -9999.000000   -9999.000000
57048     57048     shaanxi        108.7167       34.4000          102       155     2012      12        24        359              0.121500      -3.032074       0.000000       0.179854   -9999.000000   -9999.000000       0.019000       0.007000
57048     57048     shaanxi        108.7167       34.4000          102       155     2012      12        25        360              0.127292      -2.124664       0.000000       0.184359   -9999.000000   -9999.000000       0.054800       0.012000
57048     57048     shaanxi        108.7167       34.4000          102       155     2012      12        26        361              0.000000      -1.245422       0.145038       0.188679   -9999.000000   -9999.000000       0.046600   -9999.000000
57048     57048     shaanxi        108.7167       34.4000          102       155     2012      12        27        362              0.126273      -2.324890       0.000000       0.183275   -9999.000000   -9999.000000       0.052900       0.157000
57048     57048     shaanxi        108.7167       34.4000          102       155     2012      12        28        363              0.000000      -1.745575       0.000000       0.186293   -9999.000000   -9999.000000   -9999.000000   -9999.000000
57048     57048     shaanxi        108.7167       34.4000          102       155     2012      12        29        364              0.000000      -1.419189       0.276415       0.188722   -9999.000000   -9999.000000       0.055300       0.004000
57048     57048     shaanxi        108.7167       34.4000          102       155     2012      12        30        365              0.000000      -3.506683       0.000000       0.176474   -9999.000000   -9999.000000       0.013600   -9999.000000
57048     57048     shaanxi        108.7167       34.4000          102       155     2012      12        31        366              0.118467      -1.772308       0.000000       0.184726   -9999.000000   -9999.000000       0.047600   -9999.000000
