# Supplementary material for: Research on Fusing Multisatellite Soil Moisture Data Based on Bayesian Model Averaging
Source: Hindawi journal article supplement (doi:10.1155/2018/9310838), 2018-06-25
Supplement: f1 [file 9310838.f1.zip › 2012_sm00-10cm_daily_ZDB_ZHY_57051_366days_allin.txt]

57051     57051     henan          111.1928       34.7919          101       165     2012      01        01        001              0.000000   -9999.000000       0.000000   -9999.000000   -9999.000000   -9999.000000       0.057500   -9999.000000
57051     57051     henan          111.1928       34.7919          101       165     2012      01        02        002              0.082375      -0.105560       0.000000       0.178053   -9999.000000       0.263000       0.056600       0.349000
57051     57051     henan          111.1928       34.7919          101       165     2012      01        03        003              0.000000       0.150116       0.000000       0.182216   -9999.000000   -9999.000000   -9999.000000   -9999.000000
57051     57051     henan          111.1928       34.7919          101       165     2012      01        04        004              0.059708      -1.927917       0.133088       0.162954   -9999.000000       0.280400       0.031000   -9999.000000
57051     57051     henan          111.1928       34.7919          101       165     2012      01        05        005              0.059375      -2.531219       0.000000       0.157050   -9999.000000       0.075600       0.058800       0.149000
57051     57051     henan          111.1928       34.7919          101       165     2012      01        06        006              0.059750      -2.433258       0.000000       0.156143   -9999.000000   -9999.000000       0.051700   -9999.000000
57051     57051     henan          111.1928       34.7919          101       165     2012      01        07        007              0.060750      -0.535461       0.000000       0.171281   -9999.000000       0.134900       0.062200       0.404000
57051     57051     henan          111.1928       34.7919          101       165     2012      01        08        008              0.000000      -1.537109       0.000000       0.160672   -9999.000000       0.060100   -9999.000000   -9999.000000
57051     57051     henan          111.1928       34.7919          101       165     2012      01        09        009              0.062458      -0.511230       0.000000       0.173134   -9999.000000       0.620900   -9999.000000       0.093000
57051     57051     henan          111.1928       34.7919          101       165     2012      01        10        010              0.063667       0.193665       0.000000       0.181006   -9999.000000       0.071000       0.018600       0.247000
57051     57051     henan          111.1928       34.7919          101       165     2012      01        11        011              0.058667       0.008728       0.000000       0.180426   -9999.000000   -9999.000000       0.051100   -9999.000000
57051     57051     henan          111.1928       34.7919          101       165     2012      01        12        012              0.060958      -0.161560       0.000000       0.178066   -9999.000000   -9999.000000       0.041900       0.249000
57051     57051     henan          111.1928       34.7919          101       165     2012      01        13        013              0.063208      -0.188354       0.000000       0.177199   -9999.000000       0.116000       0.046800   -9999.000000
57051     57051     henan          111.1928       34.7919          101       165     2012      01        14        014              0.065125       0.358368       0.000000       0.184141   -9999.000000   -9999.000000   -9999.000000       0.072000
57051     57051     henan          111.1928       34.7919          101       165     2012      01        15        015              0.062917       0.265686       0.000000       0.183302   -9999.000000       0.111300       0.043600       0.290000
57051     57051     henan          111.1928       34.7919          101       165     2012      01        16        016              0.067250       0.782837       0.000000       0.189722   -9999.000000   -9999.000000       0.041000       0.105000
57051     57051     henan          111.1928       34.7919          101       165     2012      01        17        017              0.000000       0.247864       0.000000       0.184796   -9999.000000       0.206200       0.042400       0.448000
57051     57051     henan          111.1928       34.7919          101       165     2012      01        18        018              0.073000       0.556915       3.613477       0.187920   -9999.000000       0.099900       0.044500   -9999.000000
57051     57051     henan          111.1928       34.7919          101       165     2012      01        19        019              0.078250       0.534943       0.153701       0.189877   -9999.000000   -9999.000000   -9999.000000       0.270000
57051     57051     henan          111.1928       34.7919          101       165     2012      01        20        020              0.074667       0.699158       0.000000       0.191155   -9999.000000       0.034400   -9999.000000       0.241000
57051     57051     henan          111.1928       34.7919          101       165     2012      01        21        021              0.060792      -0.299194       0.000000       0.181668   -9999.000000   -9999.000000       0.020400       0.118000
57051     57051     henan          111.1928       34.7919          101       165     2012      01        22        022              0.059167      -2.504913       0.000000       0.153267   -9999.000000       0.217000       0.035200       0.243000
57051     57051     henan          111.1928       34.7919          101       165     2012      01        23        023              0.054167      -2.383728       0.000000       0.157356   -9999.000000       0.048500       0.046900   -9999.000000
57051     57051     henan          111.1928       34.7919          101       165     2012      01        24        024              0.052542      -2.533539       0.000000       0.154144   -9999.000000   -9999.000000   -9999.000000       0.194000
57051     57051     henan          111.1928       34.7919          101       165     2012      01        25        025              0.053250      -2.870056       0.000000       0.153227   -9999.000000       0.096300   -9999.000000   -9999.000000
57051     57051     henan          111.1928       34.7919          101       165     2012      01        26        026              0.053833      -1.644684       0.000000       0.163515   -9999.000000       0.032000       0.051600       0.195000
57051     57051     henan          111.1928       34.7919          101       165     2012      01        27        027              0.062292      -0.885651       0.000000       0.169722   -9999.000000   -9999.000000       0.032900       0.273000
57051     57051     henan          111.1928       34.7919          101       165     2012      01        28        028              0.068250       0.833740       0.000000       0.185160   -9999.000000       0.072800       0.052300   -9999.000000
57051     57051     henan          111.1928       34.7919          101       165     2012      01        29        029              0.065667       1.078674       0.000000       0.188528   -9999.000000   -9999.000000       0.048500       0.116000
57051     57051     henan          111.1928       34.7919          101       165     2012      01        30        030              0.066958       0.401093       0.000000       0.184784   -9999.000000   -9999.000000       0.050900   -9999.000000
57051     57051     henan          111.1928       34.7919          101       165     2012      01        31        031              0.075667       1.270721       0.000000       0.190461   -9999.000000       0.053400   -9999.000000       0.344000
57051     57051     henan          111.1928       34.7919          101       165     2012      02        01        032              0.070917       2.821533       0.000000       0.203315   -9999.000000   -9999.000000       0.035500   -9999.000000
57051     57051     henan          111.1928       34.7919          101       165     2012      02        02        033              0.062583       0.856445       0.000000       0.187622   -9999.000000       0.046400       0.047100   -9999.000000
57051     57051     henan          111.1928       34.7919          101       165     2012      02        03        034              0.065833      -0.092194       0.000000       0.177219   -9999.000000   -9999.000000       0.039600       0.165000
57051     57051     henan          111.1928       34.7919          101       165     2012      02        04        035              0.059208       1.275208       0.000000       0.186304   -9999.000000       0.190600       0.052800   -9999.000000
57051     57051     henan          111.1928       34.7919          101       165     2012      02        05        036              0.066333      -0.111450       0.000000       0.178151   -9999.000000       0.187700   -9999.000000       0.354000
57051     57051     henan          111.1928       34.7919          101       165     2012      02        06        037              0.068125       1.582520       0.000000       0.193450   -9999.000000   -9999.000000   -9999.000000   -9999.000000
57051     57051     henan          111.1928       34.7919          101       165     2012      02        07        038              0.057667       0.186493       0.000000       0.181682   -9999.000000       0.092500       0.017400       0.056000
57051     57051     henan          111.1928       34.7919          101       165     2012      02        08        039              0.054500      -1.075806       0.000000       0.165886   -9999.000000   -9999.000000       0.046600       0.143000
57051     57051     henan          111.1928       34.7919          101       165     2012      02        09        040              0.058042      -1.349152       0.000000       0.164236   -9999.000000   -9999.000000       0.039800   -9999.000000
57051     57051     henan          111.1928       34.7919          101       165     2012      02        10        041              0.066083      -0.213287       0.000000       0.172243   -9999.000000       0.051000       0.048100       0.267000
57051     57051     henan          111.1928       34.7919          101       165     2012      02        11        042              0.079391       1.143494       0.000000       0.181935   -9999.000000   -9999.000000   -9999.000000   -9999.000000
57051     57051     henan          111.1928       34.7919          101       165     2012      02        12        043              0.094000       2.844543       0.111180       0.196835   -9999.000000   -9999.000000   -9999.000000       0.051000
57051     57051     henan          111.1928       34.7919          101       165     2012      02        13        044              0.103750       1.605865       0.000000       0.192262   -9999.000000       0.043200   -9999.000000       0.269000
57051     57051     henan          111.1928       34.7919          101       165     2012      02        14        045              0.116750       3.185242       0.000000       0.198894       0.093000   -9999.000000       0.050700       0.218000
57051     57051     henan          111.1928       34.7919          101       165     2012      02        15        046              0.127292       3.709564       0.058381       0.207218   -9999.000000   -9999.000000       0.043800       0.249000
57051     57051     henan          111.1928       34.7919          101       165     2012      02        16        047              0.114875       2.941132       0.000000       0.205339   -9999.000000   -9999.000000       0.045200   -9999.000000
57051     57051     henan          111.1928       34.7919          101       165     2012      02        17        048              0.096958       2.540771       0.000000       0.195455   -9999.000000       0.128900   -9999.000000       0.184000
57051     57051     henan          111.1928       34.7919          101       165     2012      02        18        049              0.094375       1.524200       0.000000       0.185828   -9999.000000       0.121100       0.036800       0.148000
57051     57051     henan          111.1928       34.7919          101       165     2012      02        19        050              0.101750       2.165802       0.000000       0.186458       0.089000   -9999.000000       0.043000       0.210000
57051     57051     henan          111.1928       34.7919          101       165     2012      02        20        051              0.127083       4.229034       0.000000       0.199314   -9999.000000       0.085600       0.040100       0.262000
57051     57051     henan          111.1928       34.7919          101       165     2012      02        21        052              0.136875       5.400238       0.386718       0.206808   -9999.000000   -9999.000000   -9999.000000   -9999.000000
57051     57051     henan          111.1928       34.7919          101       165     2012      02        22        053              0.148417       4.141266       0.289025       0.211167       0.070000   -9999.000000   -9999.000000       0.323000
57051     57051     henan          111.1928       34.7919          101       165     2012      02        23        054              0.150500       6.142426       0.259372       0.214921   -9999.000000       0.132100   -9999.000000   -9999.000000
57051     57051     henan          111.1928       34.7919          101       165     2012      02        24        055              0.150083       2.697296       0.000000       0.200451   -9999.000000   -9999.000000       0.019100       0.339000
57051     57051     henan          111.1928       34.7919          101       165     2012      02        25        056              0.147667       3.160614       0.000000       0.204267   -9999.000000       0.294200       0.047200       0.434000
57051     57051     henan          111.1928       34.7919          101       165     2012      02        26        057              0.145792       1.531006       0.000000       0.191888   -9999.000000   -9999.000000       0.038400   -9999.000000
57051     57051     henan          111.1928       34.7919          101       165     2012      02        27        058              0.144292       3.492737       0.000000       0.198929   -9999.000000       0.342000   -9999.000000       0.274000
57051     57051     henan          111.1928       34.7919          101       165     2012      02        28        059              0.143333       4.525208       0.000000       0.204774   -9999.000000       0.026300   -9999.000000   -9999.000000
57051     57051     henan          111.1928       34.7919          101       165     2012      02        29        060              0.000000   -9999.000000       0.000000   -9999.000000       0.091000   -9999.000000   -9999.000000   -9999.000000
57051     57051     henan          111.1928       34.7919          101       165     2012      03        01        061              0.144833       4.121399       0.484173       0.206093   -9999.000000       0.050300       0.034700   -9999.000000
57051     57051     henan          111.1928       34.7919          101       165     2012      03        02        062              0.146333       3.201477       0.190659       0.211398   -9999.000000       0.063700       0.050600   -9999.000000
57051     57051     henan          111.1928       34.7919          101       165     2012      03        03        063              0.142792       2.965759       0.000000       0.208959   -9999.000000   -9999.000000       0.042500       0.214000
57051     57051     henan          111.1928       34.7919          101       165     2012      03        04        064              0.140667       2.019043       0.430285       0.197742   -9999.000000   -9999.000000       0.047800   -9999.000000
57051     57051     henan          111.1928       34.7919          101       165     2012      03        05        065              0.141917       2.183746       0.000000       0.199821   -9999.000000   -9999.000000   -9999.000000       0.339000
57051     57051     henan          111.1928       34.7919          101       165     2012      03        06        066              0.142667       4.047119       0.439341       0.211885       0.098000   -9999.000000       0.033100   -9999.000000
57051     57051     henan          111.1928       34.7919          101       165     2012      03        07        067              0.000000       4.247528       0.215304       0.209000   -9999.000000       0.167300       0.043700       0.195000
57051     57051     henan          111.1928       34.7919          101       165     2012      03        08        068              0.140042       7.167053       0.833716       0.212743   -9999.000000   -9999.000000       0.037100       0.340000
57051     57051     henan          111.1928       34.7919          101       165     2012      03        09        069              0.139375       4.904266       1.177698       0.214835       0.069000       0.090600       0.045900   -9999.000000
57051     57051     henan          111.1928       34.7919          101       165     2012      03        10        070              0.141435       5.826050       0.000000       0.214325       0.097000   -9999.000000   -9999.000000       0.345000
57051     57051     henan          111.1928       34.7919          101       165     2012      03        11        071              0.136667       9.174255       0.000000       0.212267       0.091000       0.075400   -9999.000000   -9999.000000
57051     57051     henan          111.1928       34.7919          101       165     2012      03        12        072              0.135750       5.457672       0.000000       0.203874   -9999.000000       0.205300       0.017300       0.144000
57051     57051     henan          111.1928       34.7919          101       165     2012      03        13        073              0.139833       6.183380       0.000000       0.204226   -9999.000000   -9999.000000       0.052600       0.322000
57051     57051     henan          111.1928       34.7919          101       165     2012      03        14        074              0.136208      11.363190       0.341604       0.201978       0.082000       0.124100   -9999.000000       0.307000
57051     57051     henan          111.1928       34.7919          101       165     2012      03        15        075              0.133167      10.403442       2.425434       0.200311   -9999.000000   -9999.000000       0.063600       0.704000
57051     57051     henan          111.1928       34.7919          101       165     2012      03        16        076              0.137083       5.445557       0.000000       0.234270       0.105000   -9999.000000   -9999.000000   -9999.000000
57051     57051     henan          111.1928       34.7919          101       165     2012      03        17        077              0.139750      10.196777       0.000000       0.224643       0.093000       0.378700       0.048400       0.455000
57051     57051     henan          111.1928       34.7919          101       165     2012      03        18        078              0.135208      13.772858       0.727427       0.215241   -9999.000000   -9999.000000       0.042200       0.286000
57051     57051     henan          111.1928       34.7919          101       165     2012      03        19        079              0.130542       9.625549       0.000000       0.213325   -9999.000000       0.072700       0.061300       0.213000
57051     57051     henan          111.1928       34.7919          101       165     2012      03        20        080              0.131000       3.719849       0.294152       0.211267       0.082000       0.111900       0.062800       0.305000
57051     57051     henan          111.1928       34.7919          101       165     2012      03        21        081              0.165792       5.917999      15.743725       0.213479   -9999.000000       0.381200       0.097000   -9999.000000
57051     57051     henan          111.1928       34.7919          101       165     2012      03        22        082              0.188708       2.662354       2.299438       0.276243   -9999.000000       0.276500   -9999.000000       1.000000
57051     57051     henan          111.1928       34.7919          101       165     2012      03        23        083              0.176375       5.115021       0.000000       0.300868   -9999.000000   -9999.000000       0.051700   -9999.000000
57051     57051     henan          111.1928       34.7919          101       165     2012      03        24        084              0.172292       8.660034       0.000000       0.272720   -9999.000000       0.130700   -9999.000000       0.501000
57051     57051     henan          111.1928       34.7919          101       165     2012      03        25        085              0.000000      11.953125       0.000000       0.259227       0.095000       0.082900       0.058100       0.668000
57051     57051     henan          111.1928       34.7919          101       165     2012      03        26        086              0.165500      13.131012       0.000000       0.250362       0.122000   -9999.000000       0.076700   -9999.000000
57051     57051     henan          111.1928       34.7919          101       165     2012      03        27        087              0.162333      14.899872       0.000000       0.242835       0.115000       0.059600   -9999.000000       0.442000
57051     57051     henan          111.1928       34.7919          101       165     2012      03        28        088              0.157083      16.802704       0.945101       0.235245   -9999.000000   -9999.000000   -9999.000000   -9999.000000
57051     57051     henan          111.1928       34.7919          101       165     2012      03        29        089              0.157167      15.316772       1.134877       0.237392       0.125000       0.297400       0.044700       0.457000
57051     57051     henan          111.1928       34.7919          101       165     2012      03        30        090              0.151958      15.099701       0.000000       0.238052       0.081000       0.065500       0.075200   -9999.000000
57051     57051     henan          111.1928       34.7919          101       165     2012      03        31        091              0.146583      12.527130       0.000000       0.229351       0.109000   -9999.000000       0.063000   -9999.000000
57051     57051     henan          111.1928       34.7919          101       165     2012      04        01        092              0.141708      15.583923       0.000000       0.218249       0.139000       0.153900       0.064300       0.320000
57051     57051     henan          111.1928       34.7919          101       165     2012      04        02        093              0.133208      18.250214       0.592258       0.209583       0.155000   -9999.000000   -9999.000000   -9999.000000
57051     57051     henan          111.1928       34.7919          101       165     2012      04        03        094              0.127917      13.054169       0.000000       0.215131   -9999.000000       0.125400       0.057800       0.490000
57051     57051     henan          111.1928       34.7919          101       165     2012      04        04        095              0.120250      15.189850       0.000000       0.206856       0.121000       0.181600       0.055200   -9999.000000
57051     57051     henan          111.1928       34.7919          101       165     2012      04        05        096              0.109875      16.955444       0.000000       0.199006       0.105000   -9999.000000       0.065800       0.240000
57051     57051     henan          111.1928       34.7919          101       165     2012      04        06        097              0.100708      17.763977       0.601617       0.190169       0.124000       0.029500       0.062800       0.342000
57051     57051     henan          111.1928       34.7919          101       165     2012      04        07        098              0.092625      18.519348       0.000000       0.183229       0.126000       0.040400       0.064200   -9999.000000
57051     57051     henan          111.1928       34.7919          101       165     2012      04        08        099              0.086500      19.570435       0.141381       0.177321       0.139000   -9999.000000   -9999.000000       0.398000
57051     57051     henan          111.1928       34.7919          101       165     2012      04        09        100              0.080333      22.141510       0.175540       0.170815       0.157000       0.025100       0.052400   -9999.000000
57051     57051     henan          111.1928       34.7919          101       165     2012      04        10        101              0.080333      17.222839       0.000000       0.172441       0.121000   -9999.000000       0.072600       0.138000
57051     57051     henan          111.1928       34.7919          101       165     2012      04        11        102              0.081478      18.248322       5.157155       0.174559       0.182500   -9999.000000       0.061300       0.371000
57051     57051     henan          111.1928       34.7919          101       165     2012      04        12        103              0.094042      18.015320       0.431712       0.195784       0.183000   -9999.000000       0.078900       0.538000
57051     57051     henan          111.1928       34.7919          101       165     2012      04        13        104              0.098750      12.997589       0.000000       0.232568   -9999.000000   -9999.000000   -9999.000000       0.422000
57051     57051     henan          111.1928       34.7919          101       165     2012      04        14        105              0.097000      17.709930       0.290228       0.209974       0.159000       0.115700       0.071500   -9999.000000
57051     57051     henan          111.1928       34.7919          101       165     2012      04        15        106              0.094583      17.758240       0.000000       0.198542       0.128500   -9999.000000       0.039300       0.271000
57051     57051     henan          111.1928       34.7919          101       165     2012      04        16        107              0.092458      19.325745       0.000000       0.189103       0.136000       0.266500       0.080900       0.277000
57051     57051     henan          111.1928       34.7919          101       165     2012      04        17        108              0.088625      19.742157       0.071128       0.180726       0.131000       0.034700       0.073800       0.387000
57051     57051     henan          111.1928       34.7919          101       165     2012      04        18        109              0.090417      18.381683       0.000000       0.177646   -9999.000000   -9999.000000   -9999.000000       0.481000
57051     57051     henan          111.1928       34.7919          101       165     2012      04        19        110              0.120042      21.093018       1.148785       0.171242       0.154000       0.033800   -9999.000000   -9999.000000
57051     57051     henan          111.1928       34.7919          101       165     2012      04        20        111              0.134917      21.846649       0.260051       0.172187       0.136500   -9999.000000       0.081600       0.618000
57051     57051     henan          111.1928       34.7919          101       165     2012      04        21        112              0.135250      19.468140       0.000000       0.181955       0.146000       0.157200       0.071000   -9999.000000
57051     57051     henan          111.1928       34.7919          101       165     2012      04        22        113              0.133167      22.848541       0.000000       0.171532       0.131000       0.141000       0.080900       0.477000
57051     57051     henan          111.1928       34.7919          101       165     2012      04        23        114              0.135000      25.167938       0.588281       0.162120       0.133000   -9999.000000       0.087900       0.600000
57051     57051     henan          111.1928       34.7919          101       165     2012      04        24        115              0.211458      24.479645       0.639307       0.158668   -9999.000000       0.053500       0.096700   -9999.000000
57051     57051     henan          111.1928       34.7919          101       165     2012      04        25        116              0.000000      17.187805       0.000000       0.174738   -9999.000000       0.165700   -9999.000000       0.495000
57051     57051     henan          111.1928       34.7919          101       165     2012      04        26        117              0.191000      19.637543       0.048772       0.163676       0.131500   -9999.000000       0.061700   -9999.000000
57051     57051     henan          111.1928       34.7919          101       165     2012      04        27        118              0.185292      23.026367       0.267773       0.156138       0.123000       0.093300   -9999.000000       0.437000
57051     57051     henan          111.1928       34.7919          101       165     2012      04        28        119              0.177522      25.586365       0.000000       0.151393       0.124000   -9999.000000       0.076200   -9999.000000
57051     57051     henan          111.1928       34.7919          101       165     2012      04        29        120              0.169708      24.948883       0.000000       0.149248       0.149000       0.179100       0.084000   -9999.000000
57051     57051     henan          111.1928       34.7919          101       165     2012      04        30        121              0.158458      24.465118       0.306250       0.147892       0.167000       0.197600   -9999.000000       0.607000
57051     57051     henan          111.1928       34.7919          101       165     2012      05        01        122              0.161333      20.113922       0.000000       0.150139       0.160500       0.423800       0.102000   -9999.000000
57051     57051     henan          111.1928       34.7919          101       165     2012      05        02        123              0.158792      22.306763       0.000000       0.150001       0.152500       0.211300       0.063500       0.618000
57051     57051     henan          111.1928       34.7919          101       165     2012      05        03        124              0.152208      24.706879       0.000000       0.147837       0.140000   -9999.000000       0.096500   -9999.000000
57051     57051     henan          111.1928       34.7919          101       165     2012      05        04        125              0.146667      25.493805       0.000000       0.145205   -9999.000000   -9999.000000       0.081500       0.379000
57051     57051     henan          111.1928       34.7919          101       165     2012      05        05        126              0.140250      27.103302       0.000000       0.142980       0.164000   -9999.000000       0.091100       0.375000
57051     57051     henan          111.1928       34.7919          101       165     2012      05        06        127              0.137292      28.827057       0.333957       0.141797       0.092000   -9999.000000   -9999.000000   -9999.000000
57051     57051     henan          111.1928       34.7919          101       165     2012      05        07        128              0.131708      29.700226       0.325985       0.140744   -9999.000000       0.046500       0.097000       0.484000
57051     57051     henan          111.1928       34.7919          101       165     2012      05        08        129              0.133208      26.080292       0.000000       0.144734       0.140000   -9999.000000       0.092400   -9999.000000
57051     57051     henan          111.1928       34.7919          101       165     2012      05        09        130              0.129167      29.126373       0.000000       0.140565   -9999.000000       0.344400       0.095300       0.327000
57051     57051     henan          111.1928       34.7919          101       165     2012      05        10        131              0.127458      28.101532       0.000000       0.139573       0.160000       0.233800       0.105200       0.449000
57051     57051     henan          111.1928       34.7919          101       165     2012      05        11        132              0.138875      29.840790       6.143914       0.137954       0.197000   -9999.000000   -9999.000000       0.370000
57051     57051     henan          111.1928       34.7919          101       165     2012      05        12        133              0.163500      22.872559       0.000000       0.188879       0.170000       0.136900   -9999.000000       0.540000
57051     57051     henan          111.1928       34.7919          101       165     2012      05        13        134              0.156125      19.888824       3.092695       0.201852       0.160000       0.140200       0.067600   -9999.000000
57051     57051     henan          111.1928       34.7919          101       165     2012      05        14        135              0.148167      22.159912       0.000000       0.177297       0.142000   -9999.000000       0.111900       0.438000
57051     57051     henan          111.1928       34.7919          101       165     2012      05        15        136              0.139083      23.604584       0.000000       0.160216       0.168000       0.128400       0.098400       0.347000
57051     57051     henan          111.1928       34.7919          101       165     2012      05        16        137              0.130750      24.627655       0.000000       0.148504       0.156000   -9999.000000       0.106900       0.449000
57051     57051     henan          111.1928       34.7919          101       165     2012      05        17        138              0.125250      25.804962       0.000000       0.143073       0.134500       0.255400   -9999.000000       0.577000
57051     57051     henan          111.1928       34.7919          101       165     2012      05        18        139              0.119708      27.835449       0.000000       0.140004       0.155000       0.193000       0.113600   -9999.000000
57051     57051     henan          111.1928       34.7919          101       165     2012      05        19        140              0.119875      25.568085       0.000000       0.140102       0.137000   -9999.000000       0.071000       0.380000
57051     57051     henan          111.1928       34.7919          101       165     2012      05        20        141              0.116208      29.758331       0.000000       0.137952   -9999.000000       0.059700       0.112400   -9999.000000
57051     57051     henan          111.1928       34.7919          101       165     2012      05        21        142              0.127833      28.770142      11.164739       0.136732   -9999.000000   -9999.000000       0.121700       0.748000
57051     57051     henan          111.1928       34.7919          101       165     2012      05        22        143              0.237958      22.220459       3.560587       0.193259       0.154000       0.216600       0.142700       0.867000
57051     57051     henan          111.1928       34.7919          101       165     2012      05        23        144              0.219625      19.388733       0.367854       0.262876   -9999.000000       0.283200   -9999.000000   -9999.000000
57051     57051     henan          111.1928       34.7919          101       165     2012      05        24        145              0.214000      21.401703       0.000000       0.231317       0.146000   -9999.000000       0.109700       0.578000
57051     57051     henan          111.1928       34.7919          101       165     2012      05        25        146              0.000000      20.030304       0.000000       0.217265   -9999.000000       0.255900       0.126600   -9999.000000
57051     57051     henan          111.1928       34.7919          101       165     2012      05        26        147              0.183583      23.101379       0.000000       0.200146       0.155000   -9999.000000       0.100900       0.521000
57051     57051     henan          111.1928       34.7919          101       165     2012      05        27        148              0.161261      26.672943       0.246852       0.180120       0.113000       0.186500       0.115500   -9999.000000
57051     57051     henan          111.1928       34.7919          101       165     2012      05        28        149              0.145042      28.895721      19.718636       0.164058       0.130000       0.205300   -9999.000000   -9999.000000
57051     57051     henan          111.1928       34.7919          101       165     2012      05        29        150              0.199750      25.401825       1.034919       0.214844       0.167000   -9999.000000   -9999.000000       0.723000
57051     57051     henan          111.1928       34.7919          101       165     2012      05        30        151              0.184250      22.777527       0.000000       0.277853       0.121000       0.150300       0.071000   -9999.000000
57051     57051     henan          111.1928       34.7919          101       165     2012      05        31        152              0.166750      25.848999       0.000000       0.240234       0.144000       0.154700       0.094600   -9999.000000
57051     57051     henan          111.1928       34.7919          101       165     2012      06        01        153              0.161667      23.288055       0.487017       0.223728       0.092000       0.314100       0.110900   -9999.000000
57051     57051     henan          111.1928       34.7919          101       165     2012      06        02        154              0.159875      25.589050       0.000000       0.208403       0.087000       0.249000       0.111900       0.390000
57051     57051     henan          111.1928       34.7919          101       165     2012      06        03        155              0.148500      26.870392       0.000000       0.189981       0.092000   -9999.000000   -9999.000000       0.596000
57051     57051     henan          111.1928       34.7919          101       165     2012      06        04        156              0.143522      26.168365       1.286808       0.178995       0.091000       0.201500       0.168200   -9999.000000
57051     57051     henan          111.1928       34.7919          101       165     2012      06        05        157              0.136125      28.398865       3.777566       0.168460       0.118000       0.055300       0.134300       0.565000
57051     57051     henan          111.1928       34.7919          101       165     2012      06        06        158              0.132333      25.320770       0.000000       0.200084       0.104000   -9999.000000       0.170500   -9999.000000
57051     57051     henan          111.1928       34.7919          101       165     2012      06        07        159              0.131500      24.916931       0.405285       0.200641       0.097000       0.075600       0.147800       0.291000
57051     57051     henan          111.1928       34.7919          101       165     2012      06        08        160              0.125875      27.996429       0.000000       0.177623       0.101500   -9999.000000       0.162900       0.588000
57051     57051     henan          111.1928       34.7919          101       165     2012      06        09        161              0.121958      27.638519       0.000000       0.164289       0.085000       0.158000   -9999.000000       0.487000
57051     57051     henan          111.1928       34.7919          101       165     2012      06        10        162              0.114708      30.933685       0.000000       0.153207   -9999.000000       0.197600       0.124700       0.547000
57051     57051     henan          111.1928       34.7919          101       165     2012      06        11        163              0.000000      30.446686       0.000000       0.147324       0.106000   -9999.000000       0.132200   -9999.000000
57051     57051     henan          111.1928       34.7919          101       165     2012      06        12        164              0.102792      30.221924       0.000000       0.143617       0.092000   -9999.000000       0.112500       0.587000
57051     57051     henan          111.1928       34.7919          101       165     2012      06        13        165              0.097708      31.975189       0.000000       0.140987       0.107000   -9999.000000       0.121300       0.500000
57051     57051     henan          111.1928       34.7919          101       165     2012      06        14        166              0.092083      33.842957       0.000000       0.139010       0.100000       0.289000   -9999.000000       0.462000
57051     57051     henan          111.1928       34.7919          101       165     2012      06        15        167              0.089542      30.446777       0.000000       0.137845   -9999.000000       0.049500   -9999.000000       0.582000
57051     57051     henan          111.1928       34.7919          101       165     2012      06        16        168              0.087208      30.889313       0.000000       0.136783       0.126000   -9999.000000       0.076700   -9999.000000
57051     57051     henan          111.1928       34.7919          101       165     2012      06        17        169              0.084750      32.455078       0.000000       0.135595       0.097500       0.133400       0.121000       0.533000
57051     57051     henan          111.1928       34.7919          101       165     2012      06        18        170              0.083958      33.423279       0.000000       0.134913       0.112000       0.122700       0.114100   -9999.000000
57051     57051     henan          111.1928       34.7919          101       165     2012      06        19        171              0.082125      34.007874       2.118813       0.133973       0.130000   -9999.000000       0.126400       0.530000
57051     57051     henan          111.1928       34.7919          101       165     2012      06        20        172              0.081583      31.239594       0.810248       0.134546       0.119000       0.106700   -9999.000000       0.515000
57051     57051     henan          111.1928       34.7919          101       165     2012      06        21        173              0.081125      31.485657       1.666925       0.137553       0.124000   -9999.000000       0.113100   -9999.000000
57051     57051     henan          111.1928       34.7919          101       165     2012      06        22        174              0.079292      33.935791       0.000000       0.132873       0.109500   -9999.000000       0.108400       0.482000
57051     57051     henan          111.1928       34.7919          101       165     2012      06        23        175              0.078250      35.286560      10.637999       0.132138       0.109000   -9999.000000       0.135900   -9999.000000
57051     57051     henan          111.1928       34.7919          101       165     2012      06        24        176              0.079833      33.671906       0.334250       0.217884       0.125000       0.219800       0.139100       0.647000
57051     57051     henan          111.1928       34.7919          101       165     2012      06        25        177              0.083250      29.144775      10.128243       0.218620       0.155000       0.204700       0.162100   -9999.000000
57051     57051     henan          111.1928       34.7919          101       165     2012      06        26        178              0.095455      25.065674       0.369617       0.266660       0.150000   -9999.000000   -9999.000000   -9999.000000
57051     57051     henan          111.1928       34.7919          101       165     2012      06        27        179              0.099167      26.419647       0.476918       0.232177       0.154000       0.363900       0.117300       0.633000
57051     57051     henan          111.1928       34.7919          101       165     2012      06        28        180              0.100208      25.783295       1.284920       0.208359       0.149500       0.335100       0.160300   -9999.000000
57051     57051     henan          111.1928       34.7919          101       165     2012      06        29        181              0.111792      24.027191       5.659224       0.209407       0.155000   -9999.000000       0.146800       0.837000
57051     57051     henan          111.1928       34.7919          101       165     2012      06        30        182              0.127833      24.466858       0.577273       0.248530       0.129000       0.237900       0.139300   -9999.000000
57051     57051     henan          111.1928       34.7919          101       165     2012      07        01        183              0.128292      28.349945       1.029602       0.219662   -9999.000000   -9999.000000   -9999.000000       0.377000
57051     57051     henan          111.1928       34.7919          101       165     2012      07        02        184              0.179958      30.449341       9.531391       0.195901       0.159000       0.095700   -9999.000000       0.747000
57051     57051     henan          111.1928       34.7919          101       165     2012      07        03        185              0.175958      25.638275       2.202711       0.269976       0.110500       0.355800       0.079200   -9999.000000
57051     57051     henan          111.1928       34.7919          101       165     2012      07        04        186              0.273333      29.211731      48.350739       0.238355       0.174500   -9999.000000       0.164900       1.000000
57051     57051     henan          111.1928       34.7919          101       165     2012      07        05        187              0.241083      24.480713       0.000000       0.356102       0.143000       0.339900       0.144900   -9999.000000
57051     57051     henan          111.1928       34.7919          101       165     2012      07        06        188              0.223292      27.265594       2.296005       0.302480   -9999.000000       0.258300       0.145200       0.660000
57051     57051     henan          111.1928       34.7919          101       165     2012      07        07        189              0.229083      27.516724       2.241744       0.285576   -9999.000000       0.374400   -9999.000000       0.801000
57051     57051     henan          111.1928       34.7919          101       165     2012      07        08        190              0.231875      26.854889      17.500477       0.292449       0.132000       0.411100       0.158500       0.717000
57051     57051     henan          111.1928       34.7919          101       165     2012      07        09        191              0.244000      26.484650       0.181746       0.306762       0.198000   -9999.000000       0.133200       1.000000
57051     57051     henan          111.1928       34.7919          101       165     2012      07        10        192              0.229583      24.828461       0.000000       0.311588       0.146000   -9999.000000       0.133300   -9999.000000
57051     57051     henan          111.1928       34.7919          101       165     2012      07        11        193              0.216917      28.778351       0.000000       0.289626       0.151000       0.353000       0.132900       0.838000
57051     57051     henan          111.1928       34.7919          101       165     2012      07        12        194              0.205583      30.265961       0.000000       0.274394       0.151000       0.287300   -9999.000000       0.651000
57051     57051     henan          111.1928       34.7919          101       165     2012      07        13        195              0.238958      30.394745      42.066811       0.258829       0.200000       0.151200   -9999.000000       0.604000
57051     57051     henan          111.1928       34.7919          101       165     2012      07        14        196              0.268417      27.364838       0.000000       0.372041       0.164000   -9999.000000       0.102300       0.904000
57051     57051     henan          111.1928       34.7919          101       165     2012      07        15        197              0.247667      25.877991       0.000000       0.332196       0.169500   -9999.000000       0.138000   -9999.000000
57051     57051     henan          111.1928       34.7919          101       165     2012      07        16        198              0.231875      26.402954       0.000000       0.300522       0.152000   -9999.000000       0.128100       0.731000
57051     57051     henan          111.1928       34.7919          101       165     2012      07        17        199              0.215875      26.529327       0.000000       0.287188   -9999.000000   -9999.000000       0.138800   -9999.000000
57051     57051     henan          111.1928       34.7919          101       165     2012      07        18        200              0.190250      27.170227       0.000000       0.275933       0.167000       0.110400   -9999.000000       0.750000
57051     57051     henan          111.1928       34.7919          101       165     2012      07        19        201              0.180583      27.934326       0.000000       0.266681       0.125500   -9999.000000       0.139600       0.677000
57051     57051     henan          111.1928       34.7919          101       165     2012      07        20        202              0.177000      28.648560       0.000000       0.257057       0.159500       0.150000       0.098200   -9999.000000
57051     57051     henan          111.1928       34.7919          101       165     2012      07        21        203              0.214917      29.664215      44.805908       0.247125       0.172000       0.220200       0.159200       1.000000
57051     57051     henan          111.1928       34.7919          101       165     2012      07        22        204              0.257333      28.298798       0.000000       0.387533       0.185000   -9999.000000       0.138100   -9999.000000
57051     57051     henan          111.1928       34.7919          101       165     2012      07        23        205              0.236958      27.301544       0.000000       0.321748       0.202000       0.161200       0.149200       0.786000
57051     57051     henan          111.1928       34.7919          101       165     2012      07        24        206              0.225875      28.467957       0.244602       0.295510       0.222000       0.200000   -9999.000000   -9999.000000
57051     57051     henan          111.1928       34.7919          101       165     2012      07        25        207              0.220417      27.740143       0.000000       0.283792       0.171500       0.240900       0.136300   -9999.000000
57051     57051     henan          111.1928       34.7919          101       165     2012      07        26        208              0.209458      30.033478       0.000000       0.272694       0.177000       0.285600       0.149700       0.798000
57051     57051     henan          111.1928       34.7919          101       165     2012      07        27        209              0.195042      31.547485       0.000000       0.258745       0.165000   -9999.000000       0.131800   -9999.000000
57051     57051     henan          111.1928       34.7919          101       165     2012      07        28        210              0.182625      31.412750       0.000000       0.243852   -9999.000000       0.133600       0.148100       0.748000
57051     57051     henan          111.1928       34.7919          101       165     2012      07        29        211              0.171375      32.524811       0.482387       0.230885       0.206000       0.107100   -9999.000000   -9999.000000
57051     57051     henan          111.1928       34.7919          101       165     2012      07        30        212              0.199375      32.340607      38.084824       0.220620       0.142000   -9999.000000   -9999.000000       0.513000
57051     57051     henan          111.1928       34.7919          101       165     2012      07        31        213              0.263167      30.186615       2.392287       0.301006       0.210500       0.358600       0.094700       0.971000
57051     57051     henan          111.1928       34.7919          101       165     2012      08        01        214              0.244125      26.926086       1.244236       0.326397       0.219000   -9999.000000       0.121600   -9999.000000
57051     57051     henan          111.1928       34.7919          101       165     2012      08        02        215              0.231250      26.794434       0.000000       0.307087   -9999.000000       0.156600       0.110200       0.929000
57051     57051     henan          111.1928       34.7919          101       165     2012      08        03        216              0.213833      27.881683       0.000000       0.293763       0.195000       0.330400       0.118700   -9999.000000
57051     57051     henan          111.1928       34.7919          101       165     2012      08        04        217              0.199292      28.717041       0.614857       0.281169       0.194000   -9999.000000   -9999.000000       0.717000
57051     57051     henan          111.1928       34.7919          101       165     2012      08        05        218              0.217708      28.383545       0.456781       0.272178       0.204500       0.102400       0.123000       0.853000
57051     57051     henan          111.1928       34.7919          101       165     2012      08        06        219              0.206083      26.658142       0.000000       0.272506       0.195000   -9999.000000       0.094700       0.727000
57051     57051     henan          111.1928       34.7919          101       165     2012      08        07        220              0.185708      28.323700       0.000000       0.259602       0.180000       0.357300       0.104200       0.676000
57051     57051     henan          111.1928       34.7919          101       165     2012      08        08        221              0.167292      29.804840       0.314132       0.247801       0.205000       0.289000       0.108600   -9999.000000
57051     57051     henan          111.1928       34.7919          101       165     2012      08        09        222              0.155833      30.288452       0.487499       0.238318       0.216000   -9999.000000       0.111900       0.714000
57051     57051     henan          111.1928       34.7919          101       165     2012      08        10        223              0.152696      28.182526       0.000000       0.234368       0.169000       0.179000   -9999.000000       0.642000
57051     57051     henan          111.1928       34.7919          101       165     2012      08        11        224              0.149917      29.443176       0.000000       0.220879       0.183000   -9999.000000       0.099900       0.640000
57051     57051     henan          111.1928       34.7919          101       165     2012      08        12        225              0.145583      30.396942       7.789597       0.209482       0.192000       0.203600       0.126900       1.000000
57051     57051     henan          111.1928       34.7919          101       165     2012      08        13        226              0.142292      28.883636       0.000000       0.239217   -9999.000000       0.253300       0.105100   -9999.000000
57051     57051     henan          111.1928       34.7919          101       165     2012      08        14        227              0.139958      24.630005       3.346617       0.249706       0.243000   -9999.000000       0.118500       0.789000
57051     57051     henan          111.1928       34.7919          101       165     2012      08        15        228              0.142917      24.709808       0.000000       0.256846       0.169000   -9999.000000   -9999.000000   -9999.000000
57051     57051     henan          111.1928       34.7919          101       165     2012      08        16        229              0.140458      27.439056       0.000000       0.240890       0.185000       0.107500   -9999.000000       0.646000
57051     57051     henan          111.1928       34.7919          101       165     2012      08        17        230              0.137375      27.289978       0.451246       0.225574       0.191000       0.240800       0.083600       0.564000
57051     57051     henan          111.1928       34.7919          101       165     2012      08        18        231              0.133000      28.456879       3.637807       0.215202       0.253000       0.143700       0.120200   -9999.000000
57051     57051     henan          111.1928       34.7919          101       165     2012      08        19        232              0.174125      24.646149      13.796692       0.248764       0.298000   -9999.000000       0.118900       1.000000
57051     57051     henan          111.1928       34.7919          101       165     2012      08        20        233              0.259083      23.788300       0.068285       0.289876   -9999.000000       0.138300       0.121900   -9999.000000
57051     57051     henan          111.1928       34.7919          101       165     2012      08        21        234              0.239417      24.045410       0.519096       0.286974       0.179000   -9999.000000   -9999.000000       0.826000
57051     57051     henan          111.1928       34.7919          101       165     2012      08        22        235              0.220583      25.203217       0.000000       0.266901       0.180000       0.231100       0.105500   -9999.000000
57051     57051     henan          111.1928       34.7919          101       165     2012      08        23        236              0.205375      24.396881       0.000000       0.249386       0.160000       0.185700       0.095000   -9999.000000
57051     57051     henan          111.1928       34.7919          101       165     2012      08        24        237              0.196783      23.885956       0.000000       0.235632   -9999.000000   -9999.000000       0.118200       0.586000
57051     57051     henan          111.1928       34.7919          101       165     2012      08        25        238              0.000000      25.170685       0.000000       0.224060       0.190000       0.127800       0.116000   -9999.000000
57051     57051     henan          111.1928       34.7919          101       165     2012      08        26        239              0.183708      24.787994       0.000000       0.217756       0.158000       0.259200       0.112700       0.642000
57051     57051     henan          111.1928       34.7919          101       165     2012      08        27        240              0.178708      26.340942       0.000000       0.209820       0.177500   -9999.000000   -9999.000000   -9999.000000
57051     57051     henan          111.1928       34.7919          101       165     2012      08        28        241              0.172542      27.287781       0.000000       0.198869       0.173000       0.101900       0.088100       0.563000
57051     57051     henan          111.1928       34.7919          101       165     2012      08        29        242              0.168042      27.801788       0.000000       0.190055   -9999.000000   -9999.000000       0.108400       0.544000
57051     57051     henan          111.1928       34.7919          101       165     2012      08        30        243              0.163125      29.680267       5.271353       0.179884       0.179000       0.231700       0.093000   -9999.000000
57051     57051     henan          111.1928       34.7919          101       165     2012      08        31        244              0.253250      30.071503      32.342659       0.183299       0.215000       0.301200       0.136500       1.000000
57051     57051     henan          111.1928       34.7919          101       165     2012      09        01        245              0.275042      22.884735      14.788609       0.340579       0.253000   -9999.000000   -9999.000000   -9999.000000
57051     57051     henan          111.1928       34.7919          101       165     2012      09        02        246              0.257250      21.500458       0.000000       0.330964       0.189000       0.285300   -9999.000000       0.846000
57051     57051     henan          111.1928       34.7919          101       165     2012      09        03        247              0.238261      22.356293       0.000000       0.305365       0.172000       0.130700       0.078000       0.796000
57051     57051     henan          111.1928       34.7919          101       165     2012      09        04        248              0.223750      24.076660       0.000000       0.288748       0.186000       0.100500       0.107500       0.672000
57051     57051     henan          111.1928       34.7919          101       165     2012      09        05        249              0.212333      24.196930       0.000000       0.276722       0.178000       0.105100       0.101700       0.817000
57051     57051     henan          111.1928       34.7919          101       165     2012      09        06        250              0.201000      25.404480       1.736681       0.266525       0.161000   -9999.000000       0.114100   -9999.000000
57051     57051     henan          111.1928       34.7919          101       165     2012      09        07        251              0.214458      24.039337       8.721788       0.267207       0.149000   -9999.000000   -9999.000000       0.683000
57051     57051     henan          111.1928       34.7919          101       165     2012      09        08        252              0.244792      24.884338       0.965919       0.280147       0.185000   -9999.000000       0.112000       0.700000
57051     57051     henan          111.1928       34.7919          101       165     2012      09        09        253              0.227000      22.911957       0.000000       0.287974   -9999.000000   -9999.000000       0.101800       0.732000
57051     57051     henan          111.1928       34.7919          101       165     2012      09        10        254              0.273375      24.220612      38.833008       0.270217       0.253000       0.168100       0.152800       1.000000
57051     57051     henan          111.1928       34.7919          101       165     2012      09        11        255              0.284833      21.272888       4.627986       0.336086       0.143500   -9999.000000       0.147400   -9999.000000
57051     57051     henan          111.1928       34.7919          101       165     2012      09        12        256              0.257087      21.560211       0.184455       0.336785       0.169000       0.143000       0.135000       0.871000
57051     57051     henan          111.1928       34.7919          101       165     2012      09        13        257              0.238708      17.868530       0.000000       0.314989       0.145000       0.198800   -9999.000000   -9999.000000
57051     57051     henan          111.1928       34.7919          101       165     2012      09        14        258              0.227292      19.153229       0.000000       0.302447       0.140000   -9999.000000       0.089500       0.676000
57051     57051     henan          111.1928       34.7919          101       165     2012      09        15        259              0.215833      20.695312       0.042532       0.294183       0.141000       0.206800       0.119300       0.791000
57051     57051     henan          111.1928       34.7919          101       165     2012      09        16        260              0.204875      20.755524       0.000000       0.286668       0.161000       0.094900       0.111300   -9999.000000
57051     57051     henan          111.1928       34.7919          101       165     2012      09        17        261              0.198458      20.383453       0.259496       0.280941       0.132500       0.177700       0.114200       0.598000
57051     57051     henan          111.1928       34.7919          101       165     2012      09        18        262              0.193125      20.782166       0.298149       0.277595       0.140500       0.156900   -9999.000000   -9999.000000
57051     57051     henan          111.1928       34.7919          101       165     2012      09        19        263              0.187958      21.802887       0.000000       0.273119       0.135000   -9999.000000       0.116700       0.721000
57051     57051     henan          111.1928       34.7919          101       165     2012      09        20        264              0.182542      22.735870       0.591822       0.266983   -9999.000000       0.215500       0.090000   -9999.000000
57051     57051     henan          111.1928       34.7919          101       165     2012      09        21        265              0.190583      21.131378       0.774768       0.266417   -9999.000000       0.016300       0.129400   -9999.000000
57051     57051     henan          111.1928       34.7919          101       165     2012      09        22        266              0.191250      19.070892       0.000000       0.273300       0.118000       0.188300       0.102500       0.621000
57051     57051     henan          111.1928       34.7919          101       165     2012      09        23        267              0.185208      21.272980       0.000000       0.267167       0.140000       0.108200       0.111200   -9999.000000
57051     57051     henan          111.1928       34.7919          101       165     2012      09        24        268              0.178167      22.543884       0.000000       0.261200       0.129000   -9999.000000   -9999.000000       0.508000
57051     57051     henan          111.1928       34.7919          101       165     2012      09        25        269              0.181042      22.241455       4.047822       0.255478   -9999.000000       0.132400       0.129300   -9999.000000
57051     57051     henan          111.1928       34.7919          101       165     2012      09        26        270              0.191667      20.734619       0.095661       0.271926       0.146000       0.094700       0.118100       0.707000
57051     57051     henan          111.1928       34.7919          101       165     2012      09        27        271              0.192071      19.656189       0.252731       0.273357       0.131000       0.225700       0.110100       0.683000
57051     57051     henan          111.1928       34.7919          101       165     2012      09        28        272              0.165133      19.533630       0.000000       0.264340       0.113000   -9999.000000       0.118500   -9999.000000
57051     57051     henan          111.1928       34.7919          101       165     2012      09        29        273              0.163333      17.265076       0.000000       0.255470       0.124000   -9999.000000   -9999.000000       0.548000
57051     57051     henan          111.1928       34.7919          101       165     2012      09        30        274              0.155333      17.839783       0.000000       0.250450       0.126000       0.097700   -9999.000000   -9999.000000
57051     57051     henan          111.1928       34.7919          101       165     2012      10        01        275              0.148250      18.630859       0.000000       0.245703       0.121000       0.131900       0.057400       0.417000
57051     57051     henan          111.1928       34.7919          101       165     2012      10        02        276              0.144174      20.574402       0.000000       0.240578       0.110000   -9999.000000       0.095300       0.551000
57051     57051     henan          111.1928       34.7919          101       165     2012      10        03        277              0.139667      20.931091       0.000000       0.236925       0.107500       0.083600       0.082800       0.532000
57051     57051     henan          111.1928       34.7919          101       165     2012      10        04        278              0.137042      21.533142       4.440422       0.232751       0.124000   -9999.000000       0.091400       0.665000
57051     57051     henan          111.1928       34.7919          101       165     2012      10        05        279              0.138792      20.563171       0.000000       0.248917       0.112000       0.153400   -9999.000000   -9999.000000
57051     57051     henan          111.1928       34.7919          101       165     2012      10        06        280              0.137125      19.724060       0.000000       0.255746   -9999.000000       0.142400       0.096500       0.647000
57051     57051     henan          111.1928       34.7919          101       165     2012      10        07        281              0.134708      19.009094       0.000000       0.245060       0.125000   -9999.000000       0.065600       0.438000
57051     57051     henan          111.1928       34.7919          101       165     2012      10        08        282              0.135708      18.216766       2.873374       0.241451       0.110500       0.122600       0.111000       0.537000
57051     57051     henan          111.1928       34.7919          101       165     2012      10        09        283              0.133875      19.005554       0.000000       0.254500       0.105000       0.188000       0.095100       0.606000
57051     57051     henan          111.1928       34.7919          101       165     2012      10        10        284              0.129792      18.466309       0.000000       0.248967       0.108000       0.326900       0.103100   -9999.000000
57051     57051     henan          111.1928       34.7919          101       165     2012      10        11        285              0.126583      18.356689       0.000000       0.239402       0.105000       0.147900   -9999.000000       0.514000
57051     57051     henan          111.1928       34.7919          101       165     2012      10        12        286              0.124542      19.163025       0.000000       0.233962       0.109000   -9999.000000       0.086900   -9999.000000
57051     57051     henan          111.1928       34.7919          101       165     2012      10        13        287              0.124375      18.006653       0.000000       0.233406       0.109000       0.120600       0.108000       0.475000
57051     57051     henan          111.1928       34.7919          101       165     2012      10        14        288              0.120875      19.581024       0.000000       0.229147       0.100500       0.041200       0.091800       0.537000
57051     57051     henan          111.1928       34.7919          101       165     2012      10        15        289              0.123000      17.966217       3.147396       0.223931       0.126000       0.166500       0.103900   -9999.000000
57051     57051     henan          111.1928       34.7919          101       165     2012      10        16        290              0.133292      16.099579       0.361692       0.236510       0.123000       0.094300   -9999.000000       0.531000
57051     57051     henan          111.1928       34.7919          101       165     2012      10        17        291              0.131708      14.552979       0.000000       0.247779   -9999.000000   -9999.000000   -9999.000000   -9999.000000
57051     57051     henan          111.1928       34.7919          101       165     2012      10        18        292              0.128542      14.958374       0.000000       0.235726       0.121000       0.119600       0.058000       0.449000
57051     57051     henan          111.1928       34.7919          101       165     2012      10        19        293              0.126625      14.250885       0.000000       0.232577       0.102000       0.121100       0.091000   -9999.000000
57051     57051     henan          111.1928       34.7919          101       165     2012      10        20        294              0.126417      15.926666       0.000000       0.229451       0.114500   -9999.000000       0.089200   -9999.000000
57051     57051     henan          111.1928       34.7919          101       165     2012      10        21        295              0.136292      18.104797       7.079474       0.225121       0.188000       0.196400       0.123300       0.766000
57051     57051     henan          111.1928       34.7919          101       165     2012      10        22        296              0.149458      13.251160       0.336845       0.267807   -9999.000000   -9999.000000   -9999.000000   -9999.000000
57051     57051     henan          111.1928       34.7919          101       165     2012      10        23        297              0.144500      12.963745       0.145094       0.259027   -9999.000000   -9999.000000       0.098500       0.759000
57051     57051     henan          111.1928       34.7919          101       165     2012      10        24        298              0.143292      11.141357       0.000000       0.252764   -9999.000000       0.101500       0.079300   -9999.000000
57051     57051     henan          111.1928       34.7919          101       165     2012      10        25        299              0.000000      12.871979       0.123168       0.248470       0.135000   -9999.000000       0.101200       0.368000
57051     57051     henan          111.1928       34.7919          101       165     2012      10        26        300              0.137167      15.151215       0.000000       0.243505       0.141000       0.103400       0.095000       0.488000
57051     57051     henan          111.1928       34.7919          101       165     2012      10        27        301              0.135917      14.404175       2.109824       0.242150       0.128000       0.186400       0.090100   -9999.000000
57051     57051     henan          111.1928       34.7919          101       165     2012      10        28        302              0.000000      15.307922       6.567626       0.238766       0.179000   -9999.000000   -9999.000000       1.000000
57051     57051     henan          111.1928       34.7919          101       165     2012      10        29        303              0.189542      15.122711       0.054080       0.261726   -9999.000000       0.122800       0.071400   -9999.000000
57051     57051     henan          111.1928       34.7919          101       165     2012      10        30        304              0.178625      12.846252       0.000000       0.270859       0.118000   -9999.000000       0.097700       0.454000
57051     57051     henan          111.1928       34.7919          101       165     2012      10        31        305              0.166917      11.759888       0.000000       0.258224       0.130000   -9999.000000       0.082600       0.544000
57051     57051     henan          111.1928       34.7919          101       165     2012      11        01        306              0.158667      11.560333       0.077619       0.251902       0.132000       0.055400       0.097200       0.484000
57051     57051     henan          111.1928       34.7919          101       165     2012      11        02        307              0.160500      12.327759       5.422676       0.249296   -9999.000000   -9999.000000   -9999.000000       0.565000
57051     57051     henan          111.1928       34.7919          101       165     2012      11        03        308              0.197083      13.528290       0.492561       0.257402   -9999.000000   -9999.000000   -9999.000000   -9999.000000
57051     57051     henan          111.1928       34.7919          101       165     2012      11        04        309              0.183000       7.609375       0.000000       0.272483   -9999.000000   -9999.000000       0.053200       0.484000
57051     57051     henan          111.1928       34.7919          101       165     2012      11        05        310              0.174042       6.346710       0.280969       0.260046       0.143000   -9999.000000       0.095600       0.393000
57051     57051     henan          111.1928       34.7919          101       165     2012      11        06        311              0.170455       7.011566       0.247687       0.255339       0.141000   -9999.000000       0.084000       0.566000
57051     57051     henan          111.1928       34.7919          101       165     2012      11        07        312              0.165667       8.728027       0.498258       0.254237       0.158000   -9999.000000       0.096000       0.419000
57051     57051     henan          111.1928       34.7919          101       165     2012      11        08        313              0.164333       7.931854       0.000000       0.253879   -9999.000000       0.119700   -9999.000000   -9999.000000
57051     57051     henan          111.1928       34.7919          101       165     2012      11        09        314              0.159000      10.370178       0.228953       0.250254   -9999.000000   -9999.000000       0.096800       0.431000
57051     57051     henan          111.1928       34.7919          101       165     2012      11        10        315              0.172250       8.132355       0.179618       0.250526   -9999.000000       0.053300       0.086100   -9999.000000
57051     57051     henan          111.1928       34.7919          101       165     2012      11        11        316              0.172083       5.494049       0.000000       0.251440       0.140000       0.184400       0.090600       0.453000
57051     57051     henan          111.1928       34.7919          101       165     2012      11        12        317              0.166875       6.006409       0.000000       0.247515       0.140000   -9999.000000       0.084800       0.639000
57051     57051     henan          111.1928       34.7919          101       165     2012      11        13        318              0.000000       6.542053       0.000000       0.246322   -9999.000000       0.124300   -9999.000000   -9999.000000
57051     57051     henan          111.1928       34.7919          101       165     2012      11        14        319              0.158875       7.934052       0.000000       0.244180   -9999.000000   -9999.000000   -9999.000000       0.359000
57051     57051     henan          111.1928       34.7919          101       165     2012      11        15        320              0.165333       7.352570       0.759165       0.242189       0.144000       0.314200       0.060100   -9999.000000
57051     57051     henan          111.1928       34.7919          101       165     2012      11        16        321              0.180583       5.340790       0.000000       0.246965       0.161000       0.156600       0.090500       0.446000
57051     57051     henan          111.1928       34.7919          101       165     2012      11        17        322              0.000000       6.333252       0.000000       0.246233       0.144000   -9999.000000       0.078000   -9999.000000
57051     57051     henan          111.1928       34.7919          101       165     2012      11        18        323              0.172958       8.185974       0.000000       0.243988       0.139000       0.232700       0.084800   -9999.000000
57051     57051     henan          111.1928       34.7919          101       165     2012      11        19        324              0.167958       8.076538       0.773649       0.242609   -9999.000000       0.052000   -9999.000000       0.454000
57051     57051     henan          111.1928       34.7919          101       165     2012      11        20        325              0.163583       7.781555       0.000000       0.240602       0.144000   -9999.000000       0.081400   -9999.000000
57051     57051     henan          111.1928       34.7919          101       165     2012      11        21        326              0.161625       6.767639       0.000000       0.240691       0.116000       0.291800       0.051200       0.525000
57051     57051     henan          111.1928       34.7919          101       165     2012      11        22        327              0.156625       8.041229       0.000000       0.240626       0.130000   -9999.000000       0.075600   -9999.000000
57051     57051     henan          111.1928       34.7919          101       165     2012      11        23        328              0.152125       6.464294       0.000000       0.238930       0.131000       0.133400       0.065900       0.192000
57051     57051     henan          111.1928       34.7919          101       165     2012      11        24        329              0.150833       5.355255       1.659397       0.236554   -9999.000000   -9999.000000       0.077900       0.415000
57051     57051     henan          111.1928       34.7919          101       165     2012      11        25        330              0.196750       6.043213       0.219995       0.240031   -9999.000000   -9999.000000   -9999.000000   -9999.000000
57051     57051     henan          111.1928       34.7919          101       165     2012      11        26        331              0.195417       4.435577       0.000000       0.248922   -9999.000000       0.064100   -9999.000000       0.557000
57051     57051     henan          111.1928       34.7919          101       165     2012      11        27        332              0.191042       4.351624       0.256922       0.238656       0.141000   -9999.000000       0.072800   -9999.000000
57051     57051     henan          111.1928       34.7919          101       165     2012      11        28        333              0.186917       5.335327       0.000000       0.240491   -9999.000000   -9999.000000       0.063300       0.332000
57051     57051     henan          111.1928       34.7919          101       165     2012      11        29        334              0.180083       2.896790       0.617503       0.225826   -9999.000000       0.264600       0.075500       0.280000
57051     57051     henan          111.1928       34.7919          101       165     2012      11        30        335              0.176167       1.799408       0.302106       0.212410   -9999.000000   -9999.000000   -9999.000000       0.303000
57051     57051     henan          111.1928       34.7919          101       165     2012      12        01        336              0.176417       2.788116       0.368546       0.221835   -9999.000000       0.113700   -9999.000000       0.522000
57051     57051     henan          111.1928       34.7919          101       165     2012      12        02        337              0.183792       0.655914       1.344261       0.202649   -9999.000000   -9999.000000       0.029200   -9999.000000
57051     57051     henan          111.1928       34.7919          101       165     2012      12        03        338              0.186667       1.331726       0.161095       0.211908   -9999.000000   -9999.000000       0.067500       0.440000
57051     57051     henan          111.1928       34.7919          101       165     2012      12        04        339              0.184417       2.698853       0.242610       0.220357   -9999.000000       0.095500       0.062900       0.416000
57051     57051     henan          111.1928       34.7919          101       165     2012      12        05        340              0.182500       3.479950       0.000000       0.230652   -9999.000000   -9999.000000       0.070500       0.335000
57051     57051     henan          111.1928       34.7919          101       165     2012      12        06        341              0.178708       3.123871       0.102677       0.223162   -9999.000000       0.104100   -9999.000000       0.464000
57051     57051     henan          111.1928       34.7919          101       165     2012      12        07        342              0.178875       4.353699       0.000000       0.232034       0.114000       0.044000       0.063300   -9999.000000
57051     57051     henan          111.1928       34.7919          101       165     2012      12        08        343              0.165042       4.273346       0.088259       0.227605   -9999.000000   -9999.000000       0.046700       0.203000
57051     57051     henan          111.1928       34.7919          101       165     2012      12        09        344              0.153708       2.357666       0.120876       0.211715   -9999.000000       0.019700       0.060600   -9999.000000
57051     57051     henan          111.1928       34.7919          101       165     2012      12        10        345              0.140083       2.206818       0.089389       0.209351   -9999.000000   -9999.000000       0.061300       0.291000
57051     57051     henan          111.1928       34.7919          101       165     2012      12        11        346              0.123833       1.556366       0.000000       0.202043   -9999.000000       0.077000       0.058200       0.258000
57051     57051     henan          111.1928       34.7919          101       165     2012      12        12        347              0.118958       0.528107       0.000000       0.191180   -9999.000000       0.100100   -9999.000000   -9999.000000
57051     57051     henan          111.1928       34.7919          101       165     2012      12        13        348              0.127500       0.579163       0.139443       0.190624   -9999.000000   -9999.000000       0.041200       0.282000
57051     57051     henan          111.1928       34.7919          101       165     2012      12        14        349              0.155792       0.340759       0.291020       0.190749   -9999.000000       0.052800       0.062600   -9999.000000
57051     57051     henan          111.1928       34.7919          101       165     2012      12        15        350              0.000000       1.075623       0.000000       0.204217   -9999.000000   -9999.000000       0.054600       0.579000
57051     57051     henan          111.1928       34.7919          101       165     2012      12        16        351              0.188917       0.875397       0.000000       0.203523   -9999.000000   -9999.000000       0.066100   -9999.000000
57051     57051     henan          111.1928       34.7919          101       165     2012      12        17        352              0.201875       1.467072       0.000000       0.214273   -9999.000000       0.322900   -9999.000000   -9999.000000
57051     57051     henan          111.1928       34.7919          101       165     2012      12        18        353              0.191708       2.016724       0.405500       0.215219   -9999.000000   -9999.000000   -9999.000000       0.314000
57051     57051     henan          111.1928       34.7919          101       165     2012      12        19        354              0.176208       2.031006       0.000000       0.210355   -9999.000000       0.137200       0.027800   -9999.000000
57051     57051     henan          111.1928       34.7919          101       165     2012      12        20        355              0.000000       0.662048       0.046112       0.195836   -9999.000000   -9999.000000       0.063500       0.434000
57051     57051     henan          111.1928       34.7919          101       165     2012      12        21        356              0.161875      -0.906097       0.000000       0.168107   -9999.000000       0.211800       0.055500   -9999.000000
57051     57051     henan          111.1928       34.7919          101       165     2012      12        22        357              0.140917      -0.021759       0.000000       0.181690   -9999.000000       0.140700       0.064800       0.125000
57051     57051     henan          111.1928       34.7919          101       165     2012      12        23        358              0.108583      -1.791809       0.000000       0.165169   -9999.000000   -9999.000000   -9999.000000       0.148000
57051     57051     henan          111.1928       34.7919          101       165     2012      12        24        359              0.103143      -2.818237       0.000000       0.150481   -9999.000000       0.045000       0.053000   -9999.000000
57051     57051     henan          111.1928       34.7919          101       165     2012      12        25        360              0.101375      -1.798767       0.000000       0.160095   -9999.000000       0.005100       0.047500       0.197000
57051     57051     henan          111.1928       34.7919          101       165     2012      12        26        361              0.000000      -1.686188       0.000000       0.162275   -9999.000000   -9999.000000       0.062600   -9999.000000
57051     57051     henan          111.1928       34.7919          101       165     2012      12        27        362              0.105000      -2.228577       0.000000       0.154062   -9999.000000       0.069400       0.058400       0.197000
57051     57051     henan          111.1928       34.7919          101       165     2012      12        28        363              0.000000      -1.263824       0.000000       0.162833   -9999.000000   -9999.000000       0.058400       0.215000
57051     57051     henan          111.1928       34.7919          101       165     2012      12        29        364              0.000000      -1.616943       0.000000       0.157398   -9999.000000   -9999.000000   -9999.000000       0.035000
57051     57051     henan          111.1928       34.7919          101       165     2012      12        30        365              0.000000      -3.827820       0.000000       0.142486   -9999.000000       0.126200       0.028900       0.302000
57051     57051     henan          111.1928       34.7919          101       165     2012      12        31        366              0.096867      -2.306366       0.000000       0.154310       0.107000   -9999.000000       0.053800   -9999.000000
