# Supplementary material for: Research on Fusing Multisatellite Soil Moisture Data Based on Bayesian Model Averaging
Source: Hindawi journal article supplement (doi:10.1155/2018/9310838), 2018-06-25
Supplement: f1 [file 9310838.f1.zip › 2012_sm00-10cm_daily_ZDB_ZHY_57071_366days_allin.txt]

57071     57071     henan          112.4078       34.8414          101       170     2012      01        01        001              0.000000   -9999.000000       0.000000   -9999.000000   -9999.000000   -9999.000000       0.036900   -9999.000000
57071     57071     henan          112.4078       34.8414          101       170     2012      01        02        002              0.222083      -0.926544       0.000000       0.199060   -9999.000000       0.046900       0.055100       0.310000
57071     57071     henan          112.4078       34.8414          101       170     2012      01        03        003              0.000000       1.408325       0.000000       0.224972   -9999.000000       0.043300   -9999.000000       0.226000
57071     57071     henan          112.4078       34.8414          101       170     2012      01        04        004              0.212625      -0.067780       0.000000       0.210059   -9999.000000       0.115100       0.041800   -9999.000000
57071     57071     henan          112.4078       34.8414          101       170     2012      01        05        005              0.202417      -0.335754       0.000000       0.203233   -9999.000000       0.006700       0.045000       0.140000
57071     57071     henan          112.4078       34.8414          101       170     2012      01        06        006              0.197125       0.032532       0.000000       0.205756   -9999.000000   -9999.000000       0.044000   -9999.000000
57071     57071     henan          112.4078       34.8414          101       170     2012      01        07        007              0.193625      -0.039886       0.000000       0.206463   -9999.000000   -9999.000000       0.054900       0.325000
57071     57071     henan          112.4078       34.8414          101       170     2012      01        08        008              0.000000      -0.467072       0.000000       0.203206   -9999.000000       0.071400   -9999.000000   -9999.000000
57071     57071     henan          112.4078       34.8414          101       170     2012      01        09        009              0.202792       1.254425       0.000000       0.218108   -9999.000000   -9999.000000   -9999.000000   -9999.000000
57071     57071     henan          112.4078       34.8414          101       170     2012      01        10        010              0.210792       2.382416       0.000000       0.228476   -9999.000000       0.012000       0.010000       0.133000
57071     57071     henan          112.4078       34.8414          101       170     2012      01        11        011              0.209417       2.323608       0.577349       0.228862   -9999.000000   -9999.000000       0.045500   -9999.000000
57071     57071     henan          112.4078       34.8414          101       170     2012      01        12        012              0.202833       0.402649       0.000000       0.212080   -9999.000000   -9999.000000       0.030700       0.331000
57071     57071     henan          112.4078       34.8414          101       170     2012      01        13        013              0.208917       1.607147       0.000000       0.227933   -9999.000000   -9999.000000       0.042100   -9999.000000
57071     57071     henan          112.4078       34.8414          101       170     2012      01        14        014              0.211333       2.020416       0.000000       0.231531   -9999.000000   -9999.000000   -9999.000000   -9999.000000
57071     57071     henan          112.4078       34.8414          101       170     2012      01        15        015              0.211583       1.577484       0.000000       0.228909   -9999.000000       0.062700       0.048200       0.203000
57071     57071     henan          112.4078       34.8414          101       170     2012      01        16        016              0.211417       1.614471       0.000000       0.230606   -9999.000000       0.048400       0.020700   -9999.000000
57071     57071     henan          112.4078       34.8414          101       170     2012      01        17        017              0.000000       0.771088       0.000000       0.224776   -9999.000000       0.105500       0.048800       0.396000
57071     57071     henan          112.4078       34.8414          101       170     2012      01        18        018              0.212000       1.364075       0.175034       0.230005   -9999.000000       0.049400       0.041500   -9999.000000
57071     57071     henan          112.4078       34.8414          101       170     2012      01        19        019              0.212625       0.784363       0.132755       0.229936   -9999.000000   -9999.000000       0.049700       0.386000
57071     57071     henan          112.4078       34.8414          101       170     2012      01        20        020              0.211917       1.559662       0.000000       0.238850   -9999.000000       0.002000   -9999.000000       0.492000
57071     57071     henan          112.4078       34.8414          101       170     2012      01        21        021              0.209875       0.217957       0.000000       0.220814   -9999.000000       0.035500       0.024300       0.156000
57071     57071     henan          112.4078       34.8414          101       170     2012      01        22        022              0.202958      -2.267273       0.435404       0.186421   -9999.000000       0.084700       0.041800       0.298000
57071     57071     henan          112.4078       34.8414          101       170     2012      01        23        023              0.192542      -2.719788       0.780174       0.183252   -9999.000000       0.005400       0.031100   -9999.000000
57071     57071     henan          112.4078       34.8414          101       170     2012      01        24        024              0.178083      -0.844696       0.178447       0.201465   -9999.000000   -9999.000000   -9999.000000       0.207000
57071     57071     henan          112.4078       34.8414          101       170     2012      01        25        025              0.171833      -1.424530       0.075077       0.196422   -9999.000000       0.086500   -9999.000000       0.188000
57071     57071     henan          112.4078       34.8414          101       170     2012      01        26        026              0.175292       0.637939       0.613768       0.212440   -9999.000000       0.005100   -9999.000000       0.336000
57071     57071     henan          112.4078       34.8414          101       170     2012      01        27        027              0.181958       2.064087       0.480935       0.223987   -9999.000000   -9999.000000       0.010000       0.230000
57071     57071     henan          112.4078       34.8414          101       170     2012      01        28        028              0.189500       2.518463       0.000000       0.229993   -9999.000000       0.013300       0.050300   -9999.000000
57071     57071     henan          112.4078       34.8414          101       170     2012      01        29        029              0.191917       2.669678       0.000000       0.231386   -9999.000000   -9999.000000       0.034800       0.302000
57071     57071     henan          112.4078       34.8414          101       170     2012      01        30        030              0.193083       0.307831       0.000000       0.215018   -9999.000000   -9999.000000       0.046000       0.302000
57071     57071     henan          112.4078       34.8414          101       170     2012      01        31        031              0.204125       1.145355       0.000000       0.221130   -9999.000000   -9999.000000   -9999.000000       0.318000
57071     57071     henan          112.4078       34.8414          101       170     2012      02        01        032              0.204083       4.073517       0.000000       0.231197   -9999.000000   -9999.000000       0.046100       0.205000
57071     57071     henan          112.4078       34.8414          101       170     2012      02        02        033              0.191083      -0.174744       0.000000       0.207511   -9999.000000   -9999.000000       0.018500   -9999.000000
57071     57071     henan          112.4078       34.8414          101       170     2012      02        03        034              0.189917       0.048462       0.000000       0.205200   -9999.000000       0.040700       0.049300       0.276000
57071     57071     henan          112.4078       34.8414          101       170     2012      02        04        035              0.193750       2.569763       0.000000       0.225740   -9999.000000   -9999.000000       0.039400   -9999.000000
57071     57071     henan          112.4078       34.8414          101       170     2012      02        05        036              0.204500       0.730469       0.000000       0.220323   -9999.000000       0.041400       0.045200       0.259000
57071     57071     henan          112.4078       34.8414          101       170     2012      02        06        037              0.210042       3.048889       0.000000       0.238857   -9999.000000   -9999.000000   -9999.000000       0.101000
57071     57071     henan          112.4078       34.8414          101       170     2012      02        07        038              0.208000       2.591583       0.000000       0.225668   -9999.000000   -9999.000000       0.022700   -9999.000000
57071     57071     henan          112.4078       34.8414          101       170     2012      02        08        039              0.205250       1.578339       0.000000       0.214055   -9999.000000   -9999.000000       0.050000       0.087000
57071     57071     henan          112.4078       34.8414          101       170     2012      02        09        040              0.204375       0.057526       0.000000       0.203153   -9999.000000   -9999.000000       0.032300   -9999.000000
57071     57071     henan          112.4078       34.8414          101       170     2012      02        10        041              0.206250       1.762085       0.000000       0.214818   -9999.000000   -9999.000000       0.045100       0.360000
57071     57071     henan          112.4078       34.8414          101       170     2012      02        11        042              0.206083       2.905914       0.000000       0.217487   -9999.000000   -9999.000000   -9999.000000   -9999.000000
57071     57071     henan          112.4078       34.8414          101       170     2012      02        12        043              0.206833       4.075592       0.000000       0.225600   -9999.000000   -9999.000000   -9999.000000   -9999.000000
57071     57071     henan          112.4078       34.8414          101       170     2012      02        13        044              0.207125       2.484711       0.000000       0.221676   -9999.000000       0.047500   -9999.000000       0.351000
57071     57071     henan          112.4078       34.8414          101       170     2012      02        14        045              0.207875       4.118042       0.000000       0.228373       0.081000   -9999.000000       0.050000   -9999.000000
57071     57071     henan          112.4078       34.8414          101       170     2012      02        15        046              0.206792       5.467377       0.241122       0.233397   -9999.000000   -9999.000000       0.035200       0.338000
57071     57071     henan          112.4078       34.8414          101       170     2012      02        16        047              0.205667       4.127960       0.000000       0.232410   -9999.000000   -9999.000000       0.041300   -9999.000000
57071     57071     henan          112.4078       34.8414          101       170     2012      02        17        048              0.204583       4.440735      15.045885       0.225620   -9999.000000   -9999.000000   -9999.000000       0.105000
57071     57071     henan          112.4078       34.8414          101       170     2012      02        18        049              0.203958       3.485748       0.000000       0.218758   -9999.000000       0.022500       0.047900       0.211000
57071     57071     henan          112.4078       34.8414          101       170     2012      02        19        050              0.204500       4.303619       0.235868       0.217834   -9999.000000   -9999.000000       0.023400       0.101000
57071     57071     henan          112.4078       34.8414          101       170     2012      02        20        051              0.205917       5.589203       0.000000       0.221876   -9999.000000   -9999.000000       0.046500       0.219000
57071     57071     henan          112.4078       34.8414          101       170     2012      02        21        052              0.204917       6.642609       0.262721       0.224021   -9999.000000       0.008800   -9999.000000   -9999.000000
57071     57071     henan          112.4078       34.8414          101       170     2012      02        22        053              0.205542       5.500092       0.000000       0.225583   -9999.000000       0.255300       0.041500       0.287000
57071     57071     henan          112.4078       34.8414          101       170     2012      02        23        054              0.203083       8.590851       0.188931       0.224597   -9999.000000   -9999.000000   -9999.000000       0.310000
57071     57071     henan          112.4078       34.8414          101       170     2012      02        24        055              0.201750       4.739716       0.000000       0.220082   -9999.000000   -9999.000000       0.013900       0.448000
57071     57071     henan          112.4078       34.8414          101       170     2012      02        25        056              0.199292       4.901855       0.995680       0.220916   -9999.000000   -9999.000000       0.046200       0.168000
57071     57071     henan          112.4078       34.8414          101       170     2012      02        26        057              0.197615       2.791809       0.049327       0.214700   -9999.000000       0.045200       0.026900   -9999.000000
57071     57071     henan          112.4078       34.8414          101       170     2012      02        27        058              0.198125       3.893585       0.040253       0.216004   -9999.000000   -9999.000000   -9999.000000       0.230000
57071     57071     henan          112.4078       34.8414          101       170     2012      02        28        059              0.197333       5.366364       0.000000       0.218111   -9999.000000   -9999.000000   -9999.000000       0.341000
57071     57071     henan          112.4078       34.8414          101       170     2012      02        29        060              0.000000   -9999.000000       0.000000   -9999.000000   -9999.000000   -9999.000000   -9999.000000   -9999.000000
57071     57071     henan          112.4078       34.8414          101       170     2012      03        01        061              0.196083       5.087616       3.548880       0.219785   -9999.000000   -9999.000000       0.027900       0.817000
57071     57071     henan          112.4078       34.8414          101       170     2012      03        02        062              0.196250       3.434479       0.737615       0.253805   -9999.000000       0.055300       0.057600   -9999.000000
57071     57071     henan          112.4078       34.8414          101       170     2012      03        03        063              0.195292       3.041016       0.190134       0.254496   -9999.000000   -9999.000000       0.040100       0.552000
57071     57071     henan          112.4078       34.8414          101       170     2012      03        04        064              0.196750       1.860809       0.314971       0.236157   -9999.000000       0.060200       0.048200   -9999.000000
57071     57071     henan          112.4078       34.8414          101       170     2012      03        05        065              0.198917       3.569061       0.119103       0.245324   -9999.000000   -9999.000000   -9999.000000       0.345000
57071     57071     henan          112.4078       34.8414          101       170     2012      03        06        066              0.199750       6.748138       0.085740       0.248329   -9999.000000   -9999.000000       0.039300       0.112000
57071     57071     henan          112.4078       34.8414          101       170     2012      03        07        067              0.000000       6.359253       0.058187       0.244144   -9999.000000       0.007900       0.028000   -9999.000000
57071     57071     henan          112.4078       34.8414          101       170     2012      03        08        068              0.199292       8.554382       0.142758       0.238414   -9999.000000   -9999.000000       0.048400       0.230000
57071     57071     henan          112.4078       34.8414          101       170     2012      03        09        069              0.199208       5.001801       0.000000       0.233080   -9999.000000       0.009900       0.041900   -9999.000000
57071     57071     henan          112.4078       34.8414          101       170     2012      03        10        070              0.201083       6.887115       0.031850       0.232609       0.088000   -9999.000000       0.039500       0.366000
57071     57071     henan          112.4078       34.8414          101       170     2012      03        11        071              0.198833      10.584351       1.133271       0.225324   -9999.000000   -9999.000000   -9999.000000   -9999.000000
57071     57071     henan          112.4078       34.8414          101       170     2012      03        12        072              0.198458       4.922272       0.793494       0.218490       0.093000   -9999.000000       0.010000   -9999.000000
57071     57071     henan          112.4078       34.8414          101       170     2012      03        13        073              0.201417       6.683380       0.000000       0.221338   -9999.000000   -9999.000000       0.046000       0.331000
57071     57071     henan          112.4078       34.8414          101       170     2012      03        14        074              0.201083      12.376587       0.256915       0.216615   -9999.000000   -9999.000000   -9999.000000   -9999.000000
57071     57071     henan          112.4078       34.8414          101       170     2012      03        15        075              0.199167       9.956360       3.489677       0.217285   -9999.000000       0.030200       0.058800       0.745000
57071     57071     henan          112.4078       34.8414          101       170     2012      03        16        076              0.201583       6.741577       0.000000       0.253301       0.082000   -9999.000000   -9999.000000   -9999.000000
57071     57071     henan          112.4078       34.8414          101       170     2012      03        17        077              0.204167      12.952667       0.000000       0.244074       0.077000   -9999.000000   -9999.000000       0.217000
57071     57071     henan          112.4078       34.8414          101       170     2012      03        18        078              0.200875      14.950287       0.054132       0.232257       0.116000   -9999.000000       0.019500       0.087000
57071     57071     henan          112.4078       34.8414          101       170     2012      03        19        079              0.196625       7.022430       0.363371       0.230204   -9999.000000   -9999.000000       0.066100       0.125000
57071     57071     henan          112.4078       34.8414          101       170     2012      03        20        080              0.197417       2.774567       0.626850       0.231919   -9999.000000       0.110800       0.044400       0.243000
57071     57071     henan          112.4078       34.8414          101       170     2012      03        21        081              0.236125       5.582581      35.394680       0.235491   -9999.000000   -9999.000000       0.096300   -9999.000000
57071     57071     henan          112.4078       34.8414          101       170     2012      03        22        082              0.243542       3.153015       0.259766       0.294857   -9999.000000       0.195500   -9999.000000       0.892000
57071     57071     henan          112.4078       34.8414          101       170     2012      03        23        083              0.235917       3.796173       0.000000       0.342777   -9999.000000   -9999.000000       0.063400       0.465000
57071     57071     henan          112.4078       34.8414          101       170     2012      03        24        084              0.234292       7.680481       0.000000       0.346443   -9999.000000   -9999.000000   -9999.000000       0.453000
57071     57071     henan          112.4078       34.8414          101       170     2012      03        25        085              0.000000      12.805756       1.305840       0.310417       0.075000       0.227200       0.069900       0.331000
57071     57071     henan          112.4078       34.8414          101       170     2012      03        26        086              0.233125      14.560272       0.000000       0.297024       0.094000   -9999.000000       0.073000   -9999.000000
57071     57071     henan          112.4078       34.8414          101       170     2012      03        27        087              0.233667      15.507629       0.000000       0.288990       0.091000       0.041500       0.068100       0.345000
57071     57071     henan          112.4078       34.8414          101       170     2012      03        28        088              0.232583      17.827972       4.562350       0.278110       0.107000   -9999.000000   -9999.000000       0.407000
57071     57071     henan          112.4078       34.8414          101       170     2012      03        29        089              0.233708      16.818878       0.000000       0.288471   -9999.000000   -9999.000000       0.029100       0.546000
57071     57071     henan          112.4078       34.8414          101       170     2012      03        30        090              0.231208      17.728760       0.000000       0.290558       0.072000       0.090300       0.076400       0.225000
57071     57071     henan          112.4078       34.8414          101       170     2012      03        31        091              0.230042      14.456360       0.000000       0.275359       0.093000   -9999.000000       0.051200   -9999.000000
57071     57071     henan          112.4078       34.8414          101       170     2012      04        01        092              0.229667      16.754120       0.000000       0.262636       0.094000   -9999.000000       0.064400       0.258000
57071     57071     henan          112.4078       34.8414          101       170     2012      04        02        093              0.226083      16.794830      16.226084       0.255310   -9999.000000       0.032500   -9999.000000   -9999.000000
57071     57071     henan          112.4078       34.8414          101       170     2012      04        03        094              0.225333      12.490540       0.000000       0.255322   -9999.000000   -9999.000000       0.084100       0.228000
57071     57071     henan          112.4078       34.8414          101       170     2012      04        04        095              0.225917      15.110687       0.000000       0.246962   -9999.000000       0.015300       0.037500   -9999.000000
57071     57071     henan          112.4078       34.8414          101       170     2012      04        05        096              0.224667      17.983032       0.000000       0.237320       0.086000   -9999.000000       0.081400   -9999.000000
57071     57071     henan          112.4078       34.8414          101       170     2012      04        06        097              0.221750      19.356659       1.857799       0.225637       0.091000       0.053000       0.057300       0.125000
57071     57071     henan          112.4078       34.8414          101       170     2012      04        07        098              0.217542      20.296295       0.000000       0.216896       0.104000       0.091000       0.069800   -9999.000000
57071     57071     henan          112.4078       34.8414          101       170     2012      04        08        099              0.213000      21.433380       0.000000       0.209573   -9999.000000   -9999.000000   -9999.000000       0.309000
57071     57071     henan          112.4078       34.8414          101       170     2012      04        09        100              0.206708      23.416748       1.160390       0.202400       0.149000       0.106600       0.074400   -9999.000000
57071     57071     henan          112.4078       34.8414          101       170     2012      04        10        101              0.204542      17.549042       0.000000       0.218899       0.103000   -9999.000000       0.086200   -9999.000000
57071     57071     henan          112.4078       34.8414          101       170     2012      04        11        102              0.199917      20.482361       2.777908       0.218537       0.142000   -9999.000000       0.112600       0.347000
57071     57071     henan          112.4078       34.8414          101       170     2012      04        12        103              0.194125      17.753479       0.602788       0.225418   -9999.000000   -9999.000000       0.091100   -9999.000000
57071     57071     henan          112.4078       34.8414          101       170     2012      04        13        104              0.193708      13.945374       1.520986       0.251013   -9999.000000   -9999.000000   -9999.000000       0.216000
57071     57071     henan          112.4078       34.8414          101       170     2012      04        14        105              0.189208      20.151703       0.000000       0.226179       0.150000       0.075900   -9999.000000   -9999.000000
57071     57071     henan          112.4078       34.8414          101       170     2012      04        15        106              0.184583      19.601929       0.000000       0.214004       0.114500   -9999.000000       0.031300       0.010000
57071     57071     henan          112.4078       34.8414          101       170     2012      04        16        107              0.179458      21.870422       0.000000       0.204307       0.100000   -9999.000000       0.090700       0.121000
57071     57071     henan          112.4078       34.8414          101       170     2012      04        17        108              0.175500      19.000702       0.000000       0.201299       0.111000       0.006200       0.064900       0.227000
57071     57071     henan          112.4078       34.8414          101       170     2012      04        18        109              0.171667      20.020599       0.000000       0.198999       0.116000   -9999.000000   -9999.000000       0.393000
57071     57071     henan          112.4078       34.8414          101       170     2012      04        19        110              0.167750      22.820862       3.336898       0.193258       0.161000       0.049700   -9999.000000   -9999.000000
57071     57071     henan          112.4078       34.8414          101       170     2012      04        20        111              0.164125      23.440155       1.895284       0.212195       0.157000       0.115900       0.101900       0.477000
57071     57071     henan          112.4078       34.8414          101       170     2012      04        21        112              0.162667      20.721069       0.000000       0.239272       0.143500   -9999.000000       0.045500       0.254000
57071     57071     henan          112.4078       34.8414          101       170     2012      04        22        113              0.163750      19.989319       0.000000       0.237299       0.098000       0.052900       0.094300       0.252000
57071     57071     henan          112.4078       34.8414          101       170     2012      04        23        114              0.163000      23.828949       0.132542       0.219019       0.121000   -9999.000000       0.104400       0.210000
57071     57071     henan          112.4078       34.8414          101       170     2012      04        24        115              0.159917      25.043152       2.654321       0.206130   -9999.000000       0.187300       0.150200   -9999.000000
57071     57071     henan          112.4078       34.8414          101       170     2012      04        25        116              0.000000      18.000671       0.177881       0.232432   -9999.000000       0.127900   -9999.000000       0.246000
57071     57071     henan          112.4078       34.8414          101       170     2012      04        26        117              0.159500      19.162140       0.076758       0.218104       0.110500   -9999.000000       0.088300       0.407000
57071     57071     henan          112.4078       34.8414          101       170     2012      04        27        118              0.158333      23.681671       0.072925       0.199597       0.110000       0.153200   -9999.000000       0.323000
57071     57071     henan          112.4078       34.8414          101       170     2012      04        28        119              0.154292      26.481262       0.000000       0.187789       0.106000   -9999.000000       0.097600       0.182000
57071     57071     henan          112.4078       34.8414          101       170     2012      04        29        120              0.150708      22.762512       0.000000       0.183990   -9999.000000   -9999.000000       0.117000   -9999.000000
57071     57071     henan          112.4078       34.8414          101       170     2012      04        30        121              0.146667      23.677490       0.000000       0.180617       0.156000       0.099000   -9999.000000       0.204000
57071     57071     henan          112.4078       34.8414          101       170     2012      05        01        122              0.146375      20.706726       0.187218       0.183567       0.151000   -9999.000000   -9999.000000   -9999.000000
57071     57071     henan          112.4078       34.8414          101       170     2012      05        02        123              0.143348      24.415955       0.000000       0.182106       0.144000   -9999.000000       0.055600       0.353000
57071     57071     henan          112.4078       34.8414          101       170     2012      05        03        124              0.139208      26.917816      14.637905       0.177869       0.122000   -9999.000000       0.131500   -9999.000000
57071     57071     henan          112.4078       34.8414          101       170     2012      05        04        125              0.136478      27.022827       0.000000       0.175423   -9999.000000   -9999.000000       0.099200   -9999.000000
57071     57071     henan          112.4078       34.8414          101       170     2012      05        05        126              0.133304      28.831360       0.000000       0.172443       0.178000   -9999.000000       0.125300       0.300000
57071     57071     henan          112.4078       34.8414          101       170     2012      05        06        127              0.130625      29.301483       0.000000       0.171407       0.124000   -9999.000000   -9999.000000   -9999.000000
57071     57071     henan          112.4078       34.8414          101       170     2012      05        07        128              0.126917      30.591370       4.468008       0.170344   -9999.000000       0.112300       0.153800       0.348000
57071     57071     henan          112.4078       34.8414          101       170     2012      05        08        129              0.129833      23.288879       0.000000       0.227655       0.116000       0.090600       0.090200   -9999.000000
57071     57071     henan          112.4078       34.8414          101       170     2012      05        09        130              0.131667      27.118439       1.490311       0.205025       0.155000   -9999.000000       0.151400   -9999.000000
57071     57071     henan          112.4078       34.8414          101       170     2012      05        10        131              0.134292      27.392456       0.000000       0.194423       0.174000   -9999.000000       0.120900       0.387000
57071     57071     henan          112.4078       34.8414          101       170     2012      05        11        132              0.132083      28.949127       5.554314       0.184473       0.238000   -9999.000000       0.150700   -9999.000000
57071     57071     henan          112.4078       34.8414          101       170     2012      05        12        133              0.130083      24.565125       0.000000       0.218230       0.108000   -9999.000000   -9999.000000       0.440000
57071     57071     henan          112.4078       34.8414          101       170     2012      05        13        134              0.133125      20.039062       0.103054       0.230825       0.152500   -9999.000000       0.092200   -9999.000000
57071     57071     henan          112.4078       34.8414          101       170     2012      05        14        135              0.135583      22.996368       0.000000       0.207025       0.121000   -9999.000000       0.191300       0.186000
57071     57071     henan          112.4078       34.8414          101       170     2012      05        15        136              0.136333      24.924866       0.000000       0.188163       0.180000       0.038300       0.135800       0.364000
57071     57071     henan          112.4078       34.8414          101       170     2012      05        16        137              0.135500      26.219360       0.000000       0.176414       0.178000   -9999.000000       0.177300       0.342000
57071     57071     henan          112.4078       34.8414          101       170     2012      05        17        138              0.133708      27.436584       0.691502       0.172327       0.122000   -9999.000000   -9999.000000       0.485000
57071     57071     henan          112.4078       34.8414          101       170     2012      05        18        139              0.128917      29.483368       0.000000       0.169889       0.139000   -9999.000000   -9999.000000   -9999.000000
57071     57071     henan          112.4078       34.8414          101       170     2012      05        19        140              0.127833      27.126465       0.000000       0.170996       0.115000   -9999.000000       0.085300       0.278000
57071     57071     henan          112.4078       34.8414          101       170     2012      05        20        141              0.125208      30.362183       0.000000       0.168968   -9999.000000   -9999.000000       0.192800       0.412000
57071     57071     henan          112.4078       34.8414          101       170     2012      05        21        142              0.122333      28.720734       0.674243       0.168293       0.183000   -9999.000000       0.145000       0.260000
57071     57071     henan          112.4078       34.8414          101       170     2012      05        22        143              0.121292      24.204681       1.811949       0.172493       0.153000   -9999.000000       0.204100       0.532000
57071     57071     henan          112.4078       34.8414          101       170     2012      05        23        144              0.123130      21.904449       0.000000       0.198085   -9999.000000       0.202700   -9999.000000   -9999.000000
57071     57071     henan          112.4078       34.8414          101       170     2012      05        24        145              0.123522      24.295593       0.272126       0.186099       0.132000   -9999.000000       0.192000       0.392000
57071     57071     henan          112.4078       34.8414          101       170     2012      05        25        146              0.000000      23.348297       0.000000       0.176973       0.120000       0.130000       0.115400       0.509000
57071     57071     henan          112.4078       34.8414          101       170     2012      05        26        147              0.126625      27.005371       0.000000       0.169998       0.171000       0.187200       0.188500       0.438000
57071     57071     henan          112.4078       34.8414          101       170     2012      05        27        148              0.124750      30.286469       0.000000       0.165630       0.140500   -9999.000000       0.141700       0.354000
57071     57071     henan          112.4078       34.8414          101       170     2012      05        28        149              0.120958      31.308289       2.513543       0.164465       0.137000       0.022600       0.170700   -9999.000000
57071     57071     henan          112.4078       34.8414          101       170     2012      05        29        150              0.118208      28.430511       1.142534       0.174955       0.151000   -9999.000000   -9999.000000       0.476000
57071     57071     henan          112.4078       34.8414          101       170     2012      05        30        151              0.121667      24.333527       0.000000       0.210729       0.124000   -9999.000000       0.099800   -9999.000000
57071     57071     henan          112.4078       34.8414          101       170     2012      05        31        152              0.120083      27.463409       0.377450       0.183273       0.165000       0.036700   -9999.000000   -9999.000000
57071     57071     henan          112.4078       34.8414          101       170     2012      06        01        153              0.121250      26.224548       0.000000       0.173738       0.112000   -9999.000000       0.150200   -9999.000000
57071     57071     henan          112.4078       34.8414          101       170     2012      06        02        154              0.120875      28.709320       0.000000       0.168706       0.102500       0.089400       0.174800   -9999.000000
57071     57071     henan          112.4078       34.8414          101       170     2012      06        03        155              0.118125      30.429474       0.000000       0.165406       0.112500   -9999.000000   -9999.000000       0.480000
57071     57071     henan          112.4078       34.8414          101       170     2012      06        04        156              0.117435      29.545929       0.000000       0.164411       0.093000       0.235800   -9999.000000   -9999.000000
57071     57071     henan          112.4078       34.8414          101       170     2012      06        05        157              0.116042      31.576965       2.881497       0.163224   -9999.000000       0.052100       0.065200       0.500000
57071     57071     henan          112.4078       34.8414          101       170     2012      06        06        158              0.113292      29.655670       3.088256       0.188219       0.119000   -9999.000000       0.130800   -9999.000000
57071     57071     henan          112.4078       34.8414          101       170     2012      06        07        159              0.115625      26.480164       1.420422       0.195012       0.099500       0.210900       0.095300   -9999.000000
57071     57071     henan          112.4078       34.8414          101       170     2012      06        08        160              0.113708      30.965515       0.000000       0.179194       0.111000   -9999.000000       0.111500       0.564000
57071     57071     henan          112.4078       34.8414          101       170     2012      06        09        161              0.113333      31.307068       0.000000       0.167763       0.082000   -9999.000000   -9999.000000   -9999.000000
57071     57071     henan          112.4078       34.8414          101       170     2012      06        10        162              0.110435      34.584961       0.000000       0.163467   -9999.000000       0.129700       0.103300       0.578000
57071     57071     henan          112.4078       34.8414          101       170     2012      06        11        163              0.000000      31.608276       0.000000       0.163289       0.146000   -9999.000000       0.123700   -9999.000000
57071     57071     henan          112.4078       34.8414          101       170     2012      06        12        164              0.107042      32.545563       0.000000       0.160723       0.095000       0.069700       0.169700       0.398000
57071     57071     henan          112.4078       34.8414          101       170     2012      06        13        165              0.105500      34.615631       9.324277       0.159198       0.103000       0.085600       0.165600       0.579000
57071     57071     henan          112.4078       34.8414          101       170     2012      06        14        166              0.103500      37.249969       0.000000       0.158539       0.094000   -9999.000000       0.156300       0.414000
57071     57071     henan          112.4078       34.8414          101       170     2012      06        15        167              0.102417      34.354340       3.365690       0.158363       0.112000   -9999.000000   -9999.000000       0.552000
57071     57071     henan          112.4078       34.8414          101       170     2012      06        16        168              0.100833      34.183777       0.135482       0.158154       0.152000   -9999.000000       0.073300   -9999.000000
57071     57071     henan          112.4078       34.8414          101       170     2012      06        17        169              0.099000      34.479309       0.000000       0.157861       0.113000   -9999.000000       0.172300       0.372000
57071     57071     henan          112.4078       34.8414          101       170     2012      06        18        170              0.098708      34.987976       0.000000       0.157770       0.127000       0.030400       0.099700       0.471000
57071     57071     henan          112.4078       34.8414          101       170     2012      06        19        171              0.098583      35.695648       0.000000       0.157483       0.100000   -9999.000000       0.116100       0.440000
57071     57071     henan          112.4078       34.8414          101       170     2012      06        20        172              0.095958      35.045563       0.000000       0.157985       0.107000   -9999.000000   -9999.000000       0.383000
57071     57071     henan          112.4078       34.8414          101       170     2012      06        21        173              0.096708      33.080078       0.000000       0.158652       0.149000   -9999.000000   -9999.000000   -9999.000000
57071     57071     henan          112.4078       34.8414          101       170     2012      06        22        174              0.096750      35.021271       0.000000       0.157322       0.124000   -9999.000000       0.065000       0.480000
57071     57071     henan          112.4078       34.8414          101       170     2012      06        23        175              0.095542      36.243225      12.304520       0.157226       0.135500       0.064600       0.141800       1.000000
57071     57071     henan          112.4078       34.8414          101       170     2012      06        24        176              0.095333      32.628387      10.447433       0.250420       0.145000   -9999.000000       0.082000       0.511000
57071     57071     henan          112.4078       34.8414          101       170     2012      06        25        177              0.145500      28.978210      31.865738       0.301368   -9999.000000       0.075100       0.153200       1.000000
57071     57071     henan          112.4078       34.8414          101       170     2012      06        26        178              0.191917      24.867462       1.285997       0.355293   -9999.000000   -9999.000000   -9999.000000   -9999.000000
57071     57071     henan          112.4078       34.8414          101       170     2012      06        27        179              0.189083      27.417938       0.000000       0.312451       0.203000   -9999.000000       0.123300       0.690000
57071     57071     henan          112.4078       34.8414          101       170     2012      06        28        180              0.185417      25.794525       1.008720       0.291667       0.193500       0.101100       0.127700   -9999.000000
57071     57071     henan          112.4078       34.8414          101       170     2012      06        29        181              0.183000      24.807983       0.950553       0.286051       0.193000   -9999.000000       0.148100       1.000000
57071     57071     henan          112.4078       34.8414          101       170     2012      06        30        182              0.184500      25.789886       0.000000       0.286539       0.125000       0.097700       0.129200   -9999.000000
57071     57071     henan          112.4078       34.8414          101       170     2012      07        01        183              0.184000      29.733459       0.000000       0.262622   -9999.000000       0.138600   -9999.000000   -9999.000000
57071     57071     henan          112.4078       34.8414          101       170     2012      07        02        184              0.180125      31.315308       1.425632       0.238981       0.172000       0.137900   -9999.000000       0.619000
57071     57071     henan          112.4078       34.8414          101       170     2012      07        03        185              0.180208      27.567902       0.295412       0.247355       0.130000       0.168200       0.071900   -9999.000000
57071     57071     henan          112.4078       34.8414          101       170     2012      07        04        186              0.203458      31.705261      16.112724       0.227144       0.207500   -9999.000000       0.173200       1.000000
57071     57071     henan          112.4078       34.8414          101       170     2012      07        05        187              0.211833      26.009430       0.369239       0.320665       0.163000   -9999.000000       0.141700   -9999.000000
57071     57071     henan          112.4078       34.8414          101       170     2012      07        06        188              0.206250      28.349548       0.268665       0.287960   -9999.000000       0.276500       0.148500   -9999.000000
57071     57071     henan          112.4078       34.8414          101       170     2012      07        07        189              0.200083      29.234589       2.576389       0.265700   -9999.000000   -9999.000000   -9999.000000       0.794000
57071     57071     henan          112.4078       34.8414          101       170     2012      07        08        190              0.217696      27.230652     101.902435       0.275570   -9999.000000       0.107200       0.146900   -9999.000000
57071     57071     henan          112.4078       34.8414          101       170     2012      07        09        191              0.247667      27.538086      10.035890       0.339647       0.218000   -9999.000000       0.162500       0.984000
57071     57071     henan          112.4078       34.8414          101       170     2012      07        10        192              0.243333      26.854767       0.910693       0.391003       0.188500   -9999.000000       0.229100   -9999.000000
57071     57071     henan          112.4078       34.8414          101       170     2012      07        11        193              0.244917      30.659149       1.552730       0.350260       0.145000       0.376000       0.175400       0.848000
57071     57071     henan          112.4078       34.8414          101       170     2012      07        12        194              0.242417      31.665741       0.000000       0.333176   -9999.000000   -9999.000000       0.193000       0.678000
57071     57071     henan          112.4078       34.8414          101       170     2012      07        13        195              0.234333      31.665741       0.883213       0.318031   -9999.000000       0.304000   -9999.000000       0.647000
57071     57071     henan          112.4078       34.8414          101       170     2012      07        14        196              0.229417      27.827576       1.055858       0.312847       0.170000   -9999.000000       0.165500       0.739000
57071     57071     henan          112.4078       34.8414          101       170     2012      07        15        197              0.228542      25.307953       5.988544       0.315083       0.169500   -9999.000000       0.218200   -9999.000000
57071     57071     henan          112.4078       34.8414          101       170     2012      07        16        198              0.227417      27.154907       0.000000       0.305192       0.158000       0.150900       0.172700       0.663000
57071     57071     henan          112.4078       34.8414          101       170     2012      07        17        199              0.226500      27.533264       0.000000       0.294868   -9999.000000   -9999.000000       0.213200       0.591000
57071     57071     henan          112.4078       34.8414          101       170     2012      07        18        200              0.225217      28.451080       0.000000       0.285366       0.183000       0.029300   -9999.000000       0.621000
57071     57071     henan          112.4078       34.8414          101       170     2012      07        19        201              0.223750      29.637329       0.000000       0.276106       0.148500   -9999.000000   -9999.000000       0.704000
57071     57071     henan          112.4078       34.8414          101       170     2012      07        20        202              0.222125      30.542175       1.068985       0.267196       0.154000   -9999.000000       0.108300   -9999.000000
57071     57071     henan          112.4078       34.8414          101       170     2012      07        21        203              0.218875      31.440155       3.684905       0.258252       0.149000       0.026400       0.240800       0.643000
57071     57071     henan          112.4078       34.8414          101       170     2012      07        22        204              0.218667      30.301575       0.000000       0.268951       0.166000   -9999.000000       0.165900       0.714000
57071     57071     henan          112.4078       34.8414          101       170     2012      07        23        205              0.219583      29.853607       0.000000       0.263941       0.211000       0.057300       0.188800       0.760000
57071     57071     henan          112.4078       34.8414          101       170     2012      07        24        206              0.217375      31.048431       1.503455       0.247437       0.230000       0.049000   -9999.000000       0.736000
57071     57071     henan          112.4078       34.8414          101       170     2012      07        25        207              0.215333      30.150452       0.384524       0.248290       0.182500       0.123700       0.209700   -9999.000000
57071     57071     henan          112.4078       34.8414          101       170     2012      07        26        208              0.216792      32.035614       0.824676       0.243693       0.175000       0.027000       0.126400       0.639000
57071     57071     henan          112.4078       34.8414          101       170     2012      07        27        209              0.214250      34.361633       1.370394       0.230782       0.146000   -9999.000000       0.207400   -9999.000000
57071     57071     henan          112.4078       34.8414          101       170     2012      07        28        210              0.211542      34.145813       0.000000       0.220733   -9999.000000       0.048500       0.150200       0.720000
57071     57071     henan          112.4078       34.8414          101       170     2012      07        29        211              0.208833      35.098114       0.158013       0.210813       0.211000       0.046600       0.184800   -9999.000000
57071     57071     henan          112.4078       34.8414          101       170     2012      07        30        212              0.205042      35.452484       8.390882       0.204374       0.119000   -9999.000000   -9999.000000   -9999.000000
57071     57071     henan          112.4078       34.8414          101       170     2012      07        31        213              0.208000      33.315063       1.587374       0.226876       0.209500   -9999.000000       0.104300       0.809000
57071     57071     henan          112.4078       34.8414          101       170     2012      08        01        214              0.211708      28.319275       0.142108       0.281712       0.198000   -9999.000000       0.144600   -9999.000000
57071     57071     henan          112.4078       34.8414          101       170     2012      08        02        215              0.212652      26.784821       0.000000       0.264979       0.190000   -9999.000000       0.100700       0.659000
57071     57071     henan          112.4078       34.8414          101       170     2012      08        03        216              0.213333      28.993408       0.000000       0.250291       0.219000       0.089300       0.118400   -9999.000000
57071     57071     henan          112.4078       34.8414          101       170     2012      08        04        217              0.212917      30.229492       5.343260       0.236503   -9999.000000   -9999.000000   -9999.000000   -9999.000000
57071     57071     henan          112.4078       34.8414          101       170     2012      08        05        218              0.226542      29.472076       9.215351       0.253072       0.224000       0.152000   -9999.000000       1.000000
57071     57071     henan          112.4078       34.8414          101       170     2012      08        06        219              0.229917      26.798309       0.000000       0.313614       0.200000   -9999.000000       0.086900   -9999.000000
57071     57071     henan          112.4078       34.8414          101       170     2012      08        07        220              0.225333      29.159332       0.000000       0.282046       0.159000   -9999.000000       0.081500       0.692000
57071     57071     henan          112.4078       34.8414          101       170     2012      08        08        221              0.222417      30.579529       0.000000       0.260507   -9999.000000   -9999.000000       0.116500   -9999.000000
57071     57071     henan          112.4078       34.8414          101       170     2012      08        09        222              0.221667      31.342834       4.844961       0.243708       0.207000   -9999.000000       0.153300       0.628000
57071     57071     henan          112.4078       34.8414          101       170     2012      08        10        223              0.223609      29.220184       0.000000       0.271891       0.155000       0.144700   -9999.000000       0.734000
57071     57071     henan          112.4078       34.8414          101       170     2012      08        11        224              0.220917      30.140503       2.882666       0.250411       0.179500   -9999.000000       0.137400       0.685000
57071     57071     henan          112.4078       34.8414          101       170     2012      08        12        225              0.230875      30.987488      41.704792       0.234491       0.160000   -9999.000000       0.144600       1.000000
57071     57071     henan          112.4078       34.8414          101       170     2012      08        13        226              0.248917      29.859467       5.558286       0.296726       0.276000       0.189200       0.102400   -9999.000000
57071     57071     henan          112.4078       34.8414          101       170     2012      08        14        227              0.242083      24.505707       0.416654       0.358815       0.235000   -9999.000000       0.095700       0.911000
57071     57071     henan          112.4078       34.8414          101       170     2012      08        15        228              0.240042      24.747009      11.013104       0.332308       0.187000   -9999.000000       0.084600       0.768000
57071     57071     henan          112.4078       34.8414          101       170     2012      08        16        229              0.236458      27.931763       0.000000       0.315018       0.209000       0.134200   -9999.000000       0.710000
57071     57071     henan          112.4078       34.8414          101       170     2012      08        17        230              0.234333      27.421906       0.000000       0.301926       0.169000   -9999.000000       0.049000       0.691000
57071     57071     henan          112.4078       34.8414          101       170     2012      08        18        231              0.232042      28.464111       0.312981       0.292912       0.198000       0.100800       0.090100   -9999.000000
57071     57071     henan          112.4078       34.8414          101       170     2012      08        19        232              0.238208      27.701508      36.904125       0.288131   -9999.000000   -9999.000000       0.065900       1.000000
57071     57071     henan          112.4078       34.8414          101       170     2012      08        20        233              0.252250      26.317139       7.879385       0.335126       0.234000   -9999.000000       0.180900       0.974000
57071     57071     henan          112.4078       34.8414          101       170     2012      08        21        234              0.246167      25.461304       2.756111       0.370534       0.182000       0.262600   -9999.000000       0.847000
57071     57071     henan          112.4078       34.8414          101       170     2012      08        22        235              0.241696      25.952972       0.000000       0.349749       0.173000   -9999.000000   -9999.000000   -9999.000000
57071     57071     henan          112.4078       34.8414          101       170     2012      08        23        236              0.237333      24.521576       0.000000       0.331504       0.138000       0.080300       0.082400   -9999.000000
57071     57071     henan          112.4078       34.8414          101       170     2012      08        24        237              0.234958      24.014771       2.781704       0.319205   -9999.000000   -9999.000000       0.173400       0.761000
57071     57071     henan          112.4078       34.8414          101       170     2012      08        25        238              0.000000      24.976410       0.214101       0.310890       0.228000       0.128400       0.128400   -9999.000000
57071     57071     henan          112.4078       34.8414          101       170     2012      08        26        239              0.231792      25.076630       0.000000       0.306396       0.173000   -9999.000000       0.155700       0.594000
57071     57071     henan          112.4078       34.8414          101       170     2012      08        27        240              0.229583      26.499664       0.000000       0.298311       0.192000   -9999.000000   -9999.000000   -9999.000000
57071     57071     henan          112.4078       34.8414          101       170     2012      08        28        241              0.228458      26.522308       1.428456       0.291627       0.145000   -9999.000000       0.155600   -9999.000000
57071     57071     henan          112.4078       34.8414          101       170     2012      08        29        242              0.226958      28.213989       0.000000       0.285104       0.155000       0.043600       0.144200       0.728000
57071     57071     henan          112.4078       34.8414          101       170     2012      08        30        243              0.224042      29.942291       0.224695       0.272075       0.215000   -9999.000000       0.199500   -9999.000000
57071     57071     henan          112.4078       34.8414          101       170     2012      08        31        244              0.221292      29.474335       9.064455       0.265629       0.272000   -9999.000000       0.196200       1.000000
57071     57071     henan          112.4078       34.8414          101       170     2012      09        01        245              0.238750      25.558014      14.524550       0.311459       0.203000   -9999.000000       0.203000   -9999.000000
57071     57071     henan          112.4078       34.8414          101       170     2012      09        02        246              0.242667      23.659485       0.258274       0.349042       0.178500       0.150300   -9999.000000   -9999.000000
57071     57071     henan          112.4078       34.8414          101       170     2012      09        03        247              0.238000      23.209015       0.675515       0.324343       0.142000       0.073500       0.053200       0.716000
57071     57071     henan          112.4078       34.8414          101       170     2012      09        04        248              0.234250      25.191864       0.000000       0.306634   -9999.000000       0.199600       0.138100   -9999.000000
57071     57071     henan          112.4078       34.8414          101       170     2012      09        05        249              0.232125      24.615021       0.000000       0.296754       0.201000       0.089900       0.097800       0.695000
57071     57071     henan          112.4078       34.8414          101       170     2012      09        06        250              0.229292      25.882721       0.167448       0.288132       0.157000   -9999.000000       0.129600   -9999.000000
57071     57071     henan          112.4078       34.8414          101       170     2012      09        07        251              0.227333      24.632202       2.959026       0.284523       0.162500   -9999.000000   -9999.000000       0.571000
57071     57071     henan          112.4078       34.8414          101       170     2012      09        08        252              0.224917      25.445709       3.911953       0.284904       0.181000       0.150500       0.144800       0.668000
57071     57071     henan          112.4078       34.8414          101       170     2012      09        09        253              0.223083      24.041992       0.000000       0.290876       0.159000   -9999.000000       0.083700       0.592000
57071     57071     henan          112.4078       34.8414          101       170     2012      09        10        254              0.226375      25.449921      35.410629       0.276943   -9999.000000       0.159700       0.193500       1.000000
57071     57071     henan          112.4078       34.8414          101       170     2012      09        11        255              0.250958      23.616821      13.446157       0.324377       0.208000   -9999.000000       0.143500   -9999.000000
57071     57071     henan          112.4078       34.8414          101       170     2012      09        12        256              0.242708      22.327606       0.000000       0.375070   -9999.000000       0.088300       0.178400       0.749000
57071     57071     henan          112.4078       34.8414          101       170     2012      09        13        257              0.239042      18.306641       0.000000       0.346341       0.156000   -9999.000000   -9999.000000       0.793000
57071     57071     henan          112.4078       34.8414          101       170     2012      09        14        258              0.236458      20.137573       0.000000       0.331832       0.132000   -9999.000000       0.126800       0.702000
57071     57071     henan          112.4078       34.8414          101       170     2012      09        15        259              0.233958      21.741425       0.000000       0.322527       0.200000       0.175700       0.144600       0.546000
57071     57071     henan          112.4078       34.8414          101       170     2012      09        16        260              0.231875      21.586548       0.000000       0.315080       0.191000   -9999.000000       0.175700   -9999.000000
57071     57071     henan          112.4078       34.8414          101       170     2012      09        17        261              0.229500      21.356445       0.000000       0.308552       0.148000   -9999.000000       0.151000       0.622000
57071     57071     henan          112.4078       34.8414          101       170     2012      09        18        262              0.227917      22.570160       2.127872       0.302755       0.136000       0.074100   -9999.000000       0.731000
57071     57071     henan          112.4078       34.8414          101       170     2012      09        19        263              0.226000      22.840668       2.939546       0.298533       0.131000   -9999.000000   -9999.000000       0.605000
57071     57071     henan          112.4078       34.8414          101       170     2012      09        20        264              0.225167      22.103149       0.930670       0.306453   -9999.000000       0.121700       0.062400       0.679000
57071     57071     henan          112.4078       34.8414          101       170     2012      09        21        265              0.223792      21.997772       0.000000       0.301292   -9999.000000   -9999.000000       0.173400   -9999.000000
57071     57071     henan          112.4078       34.8414          101       170     2012      09        22        266              0.223333      20.924957       0.000000       0.300117       0.131500   -9999.000000       0.117200       0.681000
57071     57071     henan          112.4078       34.8414          101       170     2012      09        23        267              0.221542      23.745209       0.000000       0.292814       0.132500       0.070500       0.157000   -9999.000000
57071     57071     henan          112.4078       34.8414          101       170     2012      09        24        268              0.219083      23.891632       0.000000       0.287686       0.124000   -9999.000000   -9999.000000       0.671000
57071     57071     henan          112.4078       34.8414          101       170     2012      09        25        269              0.217083      23.177307       4.805095       0.283179       0.146000   -9999.000000       0.240000   -9999.000000
57071     57071     henan          112.4078       34.8414          101       170     2012      09        26        270              0.217458      21.860962       4.109968       0.307288       0.186000       0.110600       0.149100   -9999.000000
57071     57071     henan          112.4078       34.8414          101       170     2012      09        27        271              0.218071      21.020386       0.000000       0.316925   -9999.000000   -9999.000000       0.221400       0.720000
57071     57071     henan          112.4078       34.8414          101       170     2012      09        28        272              0.209533      21.251007       0.000000       0.301955       0.098000   -9999.000000       0.178000   -9999.000000
57071     57071     henan          112.4078       34.8414          101       170     2012      09        29        273              0.206042      18.974182       0.303594       0.289362       0.101000   -9999.000000       0.203100       0.571000
57071     57071     henan          112.4078       34.8414          101       170     2012      09        30        274              0.200368      19.904846       0.000000       0.282713       0.096000   -9999.000000   -9999.000000   -9999.000000
57071     57071     henan          112.4078       34.8414          101       170     2012      10        01        275              0.196208      20.343170       0.393655       0.276316   -9999.000000   -9999.000000       0.076400   -9999.000000
57071     57071     henan          112.4078       34.8414          101       170     2012      10        02        276              0.192458      21.329193       0.000000       0.270948       0.147000   -9999.000000       0.125800       0.636000
57071     57071     henan          112.4078       34.8414          101       170     2012      10        03        277              0.188458      22.119720       0.000000       0.266328       0.097000       0.092900       0.093600   -9999.000000
57071     57071     henan          112.4078       34.8414          101       170     2012      10        04        278              0.184000      23.391296       0.436448       0.260753       0.126000       0.042200       0.116900       0.336000
57071     57071     henan          112.4078       34.8414          101       170     2012      10        05        279              0.181125      20.680847       0.000000       0.259277       0.098000   -9999.000000   -9999.000000   -9999.000000
57071     57071     henan          112.4078       34.8414          101       170     2012      10        06        280              0.178250      21.483704       0.000000       0.258547       0.109000       0.133400   -9999.000000       0.472000
57071     57071     henan          112.4078       34.8414          101       170     2012      10        07        281              0.175792      20.814453       0.000000       0.254073       0.155000   -9999.000000       0.052600       0.736000
57071     57071     henan          112.4078       34.8414          101       170     2012      10        08        282              0.173583      19.736359       0.123488       0.254118       0.169000       0.223500       0.167700       0.562000
57071     57071     henan          112.4078       34.8414          101       170     2012      10        09        283              0.170167      20.817261       0.000000       0.252832       0.089000   -9999.000000       0.117200       0.565000
57071     57071     henan          112.4078       34.8414          101       170     2012      10        10        284              0.165583      19.950256       0.000000       0.244091       0.084000   -9999.000000       0.153100   -9999.000000
57071     57071     henan          112.4078       34.8414          101       170     2012      10        11        285              0.162375      18.848663       0.000000       0.238605       0.083000       0.146000   -9999.000000       0.468000
57071     57071     henan          112.4078       34.8414          101       170     2012      10        12        286              0.160833      19.712738       0.000000       0.236430       0.154000   -9999.000000       0.142700       0.583000
57071     57071     henan          112.4078       34.8414          101       170     2012      10        13        287              0.158250      19.671448       0.000000       0.239102       0.132000       0.181900       0.113100       0.535000
57071     57071     henan          112.4078       34.8414          101       170     2012      10        14        288              0.155000      21.126221       0.145961       0.234294       0.108000       0.124300       0.178400       0.470000
57071     57071     henan          112.4078       34.8414          101       170     2012      10        15        289              0.151917      19.044647       5.046444       0.230609       0.166500   -9999.000000       0.202500   -9999.000000
57071     57071     henan          112.4078       34.8414          101       170     2012      10        16        290              0.149458      17.096313       0.655439       0.264756   -9999.000000       0.056600       0.195900       0.505000
57071     57071     henan          112.4078       34.8414          101       170     2012      10        17        291              0.147250      14.594055       1.098685       0.271977   -9999.000000   -9999.000000   -9999.000000       0.676000
57071     57071     henan          112.4078       34.8414          101       170     2012      10        18        292              0.147000      15.840454       0.000000       0.259498       0.149000       0.065300       0.113800       0.585000
57071     57071     henan          112.4078       34.8414          101       170     2012      10        19        293              0.146667      16.841522       0.000000       0.259464       0.093000   -9999.000000       0.203400       0.448000
57071     57071     henan          112.4078       34.8414          101       170     2012      10        20        294              0.146333      17.910980       0.000000       0.253059       0.114500   -9999.000000       0.130500   -9999.000000
57071     57071     henan          112.4078       34.8414          101       170     2012      10        21        295              0.144625      19.358398       1.425889       0.247345       0.123000       0.094200       0.201600       0.725000
57071     57071     henan          112.4078       34.8414          101       170     2012      10        22        296              0.141500      15.015106       0.000000       0.258605   -9999.000000       0.106900   -9999.000000   -9999.000000
57071     57071     henan          112.4078       34.8414          101       170     2012      10        23        297              0.145167      14.624634       0.000000       0.251257   -9999.000000   -9999.000000   -9999.000000       0.588000
57071     57071     henan          112.4078       34.8414          101       170     2012      10        24        298              0.149000      14.667542       0.000000       0.247296   -9999.000000       0.134900       0.070800   -9999.000000
57071     57071     henan          112.4078       34.8414          101       170     2012      10        25        299              0.000000      16.071960       0.099135       0.243434       0.115000   -9999.000000       0.173100   -9999.000000
57071     57071     henan          112.4078       34.8414          101       170     2012      10        26        300              0.148875      17.081299       0.090313       0.239317       0.109000       0.075100       0.107100       0.409000
57071     57071     henan          112.4078       34.8414          101       170     2012      10        27        301              0.148875      16.227966       6.269327       0.240877       0.105000       0.105600       0.143000   -9999.000000
57071     57071     henan          112.4078       34.8414          101       170     2012      10        28        302              0.000000      17.958282       5.617803       0.235717   -9999.000000       0.134700   -9999.000000       0.932000
57071     57071     henan          112.4078       34.8414          101       170     2012      10        29        303              0.146792      16.595123       0.000000       0.261274   -9999.000000       0.049800       0.137100   -9999.000000
57071     57071     henan          112.4078       34.8414          101       170     2012      10        30        304              0.145458      15.031952       0.000000       0.276997   -9999.000000   -9999.000000       0.122200   -9999.000000
57071     57071     henan          112.4078       34.8414          101       170     2012      10        31        305              0.145818      13.449432       0.000000       0.262901       0.093000       0.139300       0.167800       0.631000
57071     57071     henan          112.4078       34.8414          101       170     2012      11        01        306              0.145870      13.710205       0.386706       0.254350       0.095000       0.069800       0.138500   -9999.000000
57071     57071     henan          112.4078       34.8414          101       170     2012      11        02        307              0.145792      13.454285       3.765817       0.252195       0.118000   -9999.000000       0.157800       0.582000
57071     57071     henan          112.4078       34.8414          101       170     2012      11        03        308              0.140792      14.311310       0.366574       0.258184   -9999.000000       0.031700   -9999.000000   -9999.000000
57071     57071     henan          112.4078       34.8414          101       170     2012      11        04        309              0.136000       8.991089       0.000000       0.274371   -9999.000000   -9999.000000       0.070200       0.347000
57071     57071     henan          112.4078       34.8414          101       170     2012      11        05        310              0.136625       7.304718       0.329477       0.259857       0.104000       0.100700       0.143100       0.537000
57071     57071     henan          112.4078       34.8414          101       170     2012      11        06        311              0.137625       9.283600       0.000000       0.254751       0.105000       0.046800       0.099400       0.453000
57071     57071     henan          112.4078       34.8414          101       170     2012      11        07        312              0.137417      11.222473       0.000000       0.251662   -9999.000000   -9999.000000       0.133000       0.532000
57071     57071     henan          112.4078       34.8414          101       170     2012      11        08        313              0.137667      10.163116       0.000000       0.251956   -9999.000000       0.099100   -9999.000000   -9999.000000
57071     57071     henan          112.4078       34.8414          101       170     2012      11        09        314              0.136833      11.018127       0.000000       0.249984       0.171000   -9999.000000       0.151700       0.256000
57071     57071     henan          112.4078       34.8414          101       170     2012      11        10        315              0.134625       8.940247       0.128090       0.251299   -9999.000000       0.204600       0.072500       0.390000
57071     57071     henan          112.4078       34.8414          101       170     2012      11        11        316              0.132500       7.705627       0.000000       0.249989   -9999.000000   -9999.000000       0.140800       0.429000
57071     57071     henan          112.4078       34.8414          101       170     2012      11        12        317              0.132875       7.468170       0.445954       0.244489   -9999.000000   -9999.000000       0.081900       0.361000
57071     57071     henan          112.4078       34.8414          101       170     2012      11        13        318              0.000000       8.850464       0.000000       0.242496   -9999.000000   -9999.000000       0.113900   -9999.000000
57071     57071     henan          112.4078       34.8414          101       170     2012      11        14        319              0.132333      10.011414       0.000000       0.239428   -9999.000000       0.054400   -9999.000000       0.307000
57071     57071     henan          112.4078       34.8414          101       170     2012      11        15        320              0.131667       8.220398       0.398617       0.237073   -9999.000000       0.239500       0.099000       0.575000
57071     57071     henan          112.4078       34.8414          101       170     2012      11        16        321              0.129875       7.279572       0.000000       0.241004   -9999.000000   -9999.000000       0.127400       0.725000
57071     57071     henan          112.4078       34.8414          101       170     2012      11        17        322              0.000000       7.806549       0.000000       0.241254       0.091000   -9999.000000       0.071700       0.251000
57071     57071     henan          112.4078       34.8414          101       170     2012      11        18        323              0.131208       9.421112       0.137639       0.239017       0.105000   -9999.000000       0.111800   -9999.000000
57071     57071     henan          112.4078       34.8414          101       170     2012      11        19        324              0.129958      10.596375       0.356545       0.236547   -9999.000000       0.057200   -9999.000000       0.445000
57071     57071     henan          112.4078       34.8414          101       170     2012      11        20        325              0.129333       8.782990       0.000000       0.234347   -9999.000000       0.266100   -9999.000000   -9999.000000
57071     57071     henan          112.4078       34.8414          101       170     2012      11        21        326              0.129174       7.649658       0.000000       0.235268   -9999.000000       0.060200       0.027700       0.368000
57071     57071     henan          112.4078       34.8414          101       170     2012      11        22        327              0.127917       8.755249       0.000000       0.235135   -9999.000000   -9999.000000       0.097300   -9999.000000
57071     57071     henan          112.4078       34.8414          101       170     2012      11        23        328              0.126208       8.506714       0.000000       0.234770   -9999.000000   -9999.000000       0.053600   -9999.000000
57071     57071     henan          112.4078       34.8414          101       170     2012      11        24        329              0.126292       6.331848       2.035807       0.233819   -9999.000000       0.077000       0.085800       0.380000
57071     57071     henan          112.4078       34.8414          101       170     2012      11        25        330              0.125000       7.261810       1.051656       0.238639   -9999.000000   -9999.000000   -9999.000000   -9999.000000
57071     57071     henan          112.4078       34.8414          101       170     2012      11        26        331              0.123826       5.601898       0.202017       0.265570   -9999.000000       0.076200   -9999.000000       0.553000
57071     57071     henan          112.4078       34.8414          101       170     2012      11        27        332              0.125458       5.687592       0.173220       0.254108       0.092000       0.031200       0.054700   -9999.000000
57071     57071     henan          112.4078       34.8414          101       170     2012      11        28        333              0.124875       7.939789       0.068864       0.250131   -9999.000000       0.111900       0.118400   -9999.000000
57071     57071     henan          112.4078       34.8414          101       170     2012      11        29        334              0.123083       5.648132       0.000000       0.245190   -9999.000000       0.060900       0.078900       0.384000
57071     57071     henan          112.4078       34.8414          101       170     2012      11        30        335              0.122083       4.212799       0.086242       0.241632   -9999.000000   -9999.000000       0.104700   -9999.000000
57071     57071     henan          112.4078       34.8414          101       170     2012      12        01        336              0.121000       3.592590       0.790616       0.237030   -9999.000000       0.106200   -9999.000000       0.673000
57071     57071     henan          112.4078       34.8414          101       170     2012      12        02        337              0.121250       0.856598       0.605734       0.229197   -9999.000000       0.064900       0.047000   -9999.000000
57071     57071     henan          112.4078       34.8414          101       170     2012      12        03        338              0.121667       1.831909       0.000000       0.248970   -9999.000000   -9999.000000       0.094900       0.400000
57071     57071     henan          112.4078       34.8414          101       170     2012      12        04        339              0.122750       3.924500       0.190768       0.245329   -9999.000000       0.070800       0.053500       0.573000
57071     57071     henan          112.4078       34.8414          101       170     2012      12        05        340              0.121417       5.493500       0.231278       0.250844   -9999.000000   -9999.000000       0.080300       0.352000
57071     57071     henan          112.4078       34.8414          101       170     2012      12        06        341              0.122042       4.020813       0.029852       0.238748   -9999.000000       0.089800   -9999.000000       0.396000
57071     57071     henan          112.4078       34.8414          101       170     2012      12        07        342              0.121458       5.263397       0.000000       0.242241   -9999.000000       0.114100   -9999.000000   -9999.000000
57071     57071     henan          112.4078       34.8414          101       170     2012      12        08        343              0.120125       5.337280       0.000000       0.239298   -9999.000000   -9999.000000       0.018800       0.131000
57071     57071     henan          112.4078       34.8414          101       170     2012      12        09        344              0.119292       3.514435       0.000000       0.225898   -9999.000000       0.058600       0.091900       0.546000
57071     57071     henan          112.4078       34.8414          101       170     2012      12        10        345              0.118333       2.347107       0.000000       0.219396   -9999.000000   -9999.000000       0.042200       0.289000
57071     57071     henan          112.4078       34.8414          101       170     2012      12        11        346              0.117000       2.020477       0.000000       0.218154   -9999.000000   -9999.000000       0.065400       0.326000
57071     57071     henan          112.4078       34.8414          101       170     2012      12        12        347              0.117500       0.117523       0.000000       0.205536   -9999.000000       0.065600   -9999.000000   -9999.000000
57071     57071     henan          112.4078       34.8414          101       170     2012      12        13        348              0.118000       0.393524       2.772730       0.208850   -9999.000000   -9999.000000       0.059100       0.303000
57071     57071     henan          112.4078       34.8414          101       170     2012      12        14        349              0.119917      -0.105377       1.852625       0.222885   -9999.000000   -9999.000000       0.063100       0.868000
57071     57071     henan          112.4078       34.8414          101       170     2012      12        15        350              0.000000       2.236359       0.226085       0.261541   -9999.000000       0.062000       0.087200       0.486000
57071     57071     henan          112.4078       34.8414          101       170     2012      12        16        351              0.120833       1.220459       0.000000       0.250540   -9999.000000   -9999.000000       0.082200       0.681000
57071     57071     henan          112.4078       34.8414          101       170     2012      12        17        352              0.121000       2.139557       0.759889       0.260770   -9999.000000       0.176100       0.084400   -9999.000000
57071     57071     henan          112.4078       34.8414          101       170     2012      12        18        353              0.120542       1.567230       0.000000       0.250519   -9999.000000   -9999.000000   -9999.000000       0.365000
57071     57071     henan          112.4078       34.8414          101       170     2012      12        19        354              0.120000       0.562408       0.000000       0.227244   -9999.000000       0.044500       0.021800   -9999.000000
57071     57071     henan          112.4078       34.8414          101       170     2012      12        20        355              0.000000       0.229767       0.000000       0.219744   -9999.000000       0.127900       0.084800       0.300000
57071     57071     henan          112.4078       34.8414          101       170     2012      12        21        356              0.119958      -0.673035       0.095329       0.204526   -9999.000000   -9999.000000       0.052500   -9999.000000
57071     57071     henan          112.4078       34.8414          101       170     2012      12        22        357              0.119125       1.042908       0.000000       0.226759   -9999.000000       0.078000       0.070400   -9999.000000
57071     57071     henan          112.4078       34.8414          101       170     2012      12        23        358              0.117167       0.108612       0.000000       0.217015   -9999.000000   -9999.000000   -9999.000000       0.281000
57071     57071     henan          112.4078       34.8414          101       170     2012      12        24        359              0.116952      -2.306091       0.000000       0.188982   -9999.000000       0.104600       0.076900   -9999.000000
57071     57071     henan          112.4078       34.8414          101       170     2012      12        25        360              0.116500      -0.967224       0.000000       0.198415   -9999.000000       0.042600       0.029400       0.275000
57071     57071     henan          112.4078       34.8414          101       170     2012      12        26        361              0.000000      -2.309387       0.000000       0.188691   -9999.000000       0.264300       0.081800   -9999.000000
57071     57071     henan          112.4078       34.8414          101       170     2012      12        27        362              0.118364      -2.198273       0.000000       0.184494   -9999.000000       0.028500       0.053700   -9999.000000
57071     57071     henan          112.4078       34.8414          101       170     2012      12        28        363              0.118000      -1.053040       0.000000       0.194726   -9999.000000   -9999.000000       0.072100       0.560000
57071     57071     henan          112.4078       34.8414          101       170     2012      12        29        364              0.000000       0.299774       0.000000       0.213049   -9999.000000   -9999.000000   -9999.000000   -9999.000000
57071     57071     henan          112.4078       34.8414          101       170     2012      12        30        365              0.000000      -2.369873       0.000000       0.182617   -9999.000000       0.133500       0.050500       0.299000
57071     57071     henan          112.4078       34.8414          101       170     2012      12        31        366              0.115400      -0.920288       0.000000       0.197846   -9999.000000   -9999.000000       0.055300   -9999.000000
