# Supplementary material for: Research on Fusing Multisatellite Soil Moisture Data Based on Bayesian Model Averaging
Source: Hindawi journal article supplement (doi:10.1155/2018/9310838), 2018-06-25
Supplement: f1 [file 9310838.f1.zip › 2012_sm00-10cm_daily_ZDB_ZHY_57076_366days_allin.txt]

57076     57076     henan          112.7900       34.7344          101       171     2012      01        01        001              0.000000   -9999.000000       0.000000   -9999.000000   -9999.000000   -9999.000000       0.054600   -9999.000000
57076     57076     henan          112.7900       34.7344          101       171     2012      01        02        002              0.209250      -0.624481       0.000000       0.197363   -9999.000000       0.120600       0.111400       0.453000
57076     57076     henan          112.7900       34.7344          101       171     2012      01        03        003              0.000000       2.034180       0.000000       0.215918   -9999.000000       0.111000   -9999.000000       0.125000
57076     57076     henan          112.7900       34.7344          101       171     2012      01        04        004              0.191750       0.889893       0.000000       0.206877   -9999.000000       0.227400       0.088500   -9999.000000
57076     57076     henan          112.7900       34.7344          101       171     2012      01        05        005              0.170625      -0.129822       0.000000       0.197039   -9999.000000       0.095100       0.106600       0.314000
57076     57076     henan          112.7900       34.7344          101       171     2012      01        06        006              0.176000      -0.007843       0.000000       0.197992   -9999.000000   -9999.000000       0.127000   -9999.000000
57076     57076     henan          112.7900       34.7344          101       171     2012      01        07        007              0.172250       0.187744       0.000000       0.200550   -9999.000000   -9999.000000       0.124700       0.261000
57076     57076     henan          112.7900       34.7344          101       171     2012      01        08        008              0.000000      -0.247894       0.000000       0.198490   -9999.000000       0.083700       0.119300       0.155000
57076     57076     henan          112.7900       34.7344          101       171     2012      01        09        009              0.180542       1.438385       0.000000       0.207645   -9999.000000   -9999.000000   -9999.000000   -9999.000000
57076     57076     henan          112.7900       34.7344          101       171     2012      01        10        010              0.190708       2.058868       0.000000       0.211687   -9999.000000       0.031000       0.020500       0.322000
57076     57076     henan          112.7900       34.7344          101       171     2012      01        11        011              0.194875       2.104034       0.805281       0.212148   -9999.000000   -9999.000000       0.073800   -9999.000000
57076     57076     henan          112.7900       34.7344          101       171     2012      01        12        012              0.185958       0.415131       0.000000       0.202021   -9999.000000   -9999.000000       0.049800       0.283000
57076     57076     henan          112.7900       34.7344          101       171     2012      01        13        013              0.186875       1.256897       0.000000       0.214388   -9999.000000       0.035800       0.072000   -9999.000000
57076     57076     henan          112.7900       34.7344          101       171     2012      01        14        014              0.193500       1.895721       0.000000       0.217455   -9999.000000   -9999.000000   -9999.000000   -9999.000000
57076     57076     henan          112.7900       34.7344          101       171     2012      01        15        015              0.194167       1.563965       0.000000       0.216887   -9999.000000       0.134600       0.076300       0.378000
57076     57076     henan          112.7900       34.7344          101       171     2012      01        16        016              0.192000       1.809601       0.000000       0.216547   -9999.000000       0.015000       0.027600   -9999.000000
57076     57076     henan          112.7900       34.7344          101       171     2012      01        17        017              0.000000       0.717468       0.000000       0.214305   -9999.000000   -9999.000000       0.069200       0.386000
57076     57076     henan          112.7900       34.7344          101       171     2012      01        18        018              0.196000       1.485382       0.390079       0.219297   -9999.000000       0.135100       0.054100   -9999.000000
57076     57076     henan          112.7900       34.7344          101       171     2012      01        19        019              0.196417       1.019928       0.129513       0.220149   -9999.000000   -9999.000000       0.061100       0.655000
57076     57076     henan          112.7900       34.7344          101       171     2012      01        20        020              0.195458       2.226501       0.000000       0.227544   -9999.000000       0.023300   -9999.000000       0.635000
57076     57076     henan          112.7900       34.7344          101       171     2012      01        21        021              0.187375       0.937134       0.000000       0.217033   -9999.000000       0.090200       0.037600   -9999.000000
57076     57076     henan          112.7900       34.7344          101       171     2012      01        22        022              0.163083      -1.748779       0.000000       0.191445   -9999.000000       0.201000       0.044700       0.204000
57076     57076     henan          112.7900       34.7344          101       171     2012      01        23        023              0.138625      -2.084869       0.370148       0.186984   -9999.000000   -9999.000000       0.055000   -9999.000000
57076     57076     henan          112.7900       34.7344          101       171     2012      01        24        024              0.131792      -0.356750       0.442090       0.198161   -9999.000000   -9999.000000   -9999.000000       0.299000
57076     57076     henan          112.7900       34.7344          101       171     2012      01        25        025              0.124292      -0.481476       0.145303       0.197338   -9999.000000       0.218800   -9999.000000       0.349000
57076     57076     henan          112.7900       34.7344          101       171     2012      01        26        026              0.129917       0.684570       0.585842       0.202271   -9999.000000       0.009200   -9999.000000       0.434000
57076     57076     henan          112.7900       34.7344          101       171     2012      01        27        027              0.144208       2.361816       0.382570       0.214908   -9999.000000   -9999.000000       0.031400       0.117000
57076     57076     henan          112.7900       34.7344          101       171     2012      01        28        028              0.173833       2.968414       0.085968       0.219238   -9999.000000       0.064800       0.086200   -9999.000000
57076     57076     henan          112.7900       34.7344          101       171     2012      01        29        029              0.187667       2.809143       0.000000       0.218772   -9999.000000   -9999.000000       0.060400       0.173000
57076     57076     henan          112.7900       34.7344          101       171     2012      01        30        030              0.190083       0.814758       0.000000       0.210910   -9999.000000       0.192700       0.066800       0.434000
57076     57076     henan          112.7900       34.7344          101       171     2012      01        31        031              0.188917       1.366028       1.198464       0.211162   -9999.000000       0.160100   -9999.000000       0.439000
57076     57076     henan          112.7900       34.7344          101       171     2012      02        01        032              0.188000       4.123322       0.000000       0.219758   -9999.000000   -9999.000000       0.074900       0.061000
57076     57076     henan          112.7900       34.7344          101       171     2012      02        02        033              0.184000       0.365204       0.000000       0.203238   -9999.000000       0.038900       0.031100   -9999.000000
57076     57076     henan          112.7900       34.7344          101       171     2012      02        03        034              0.181792       0.232147       0.000000       0.199028       0.113000       0.118400       0.076000       0.151000
57076     57076     henan          112.7900       34.7344          101       171     2012      02        04        035              0.184250       2.402191       0.000000       0.209193   -9999.000000       0.289500       0.055500   -9999.000000
57076     57076     henan          112.7900       34.7344          101       171     2012      02        05        036              0.187375       1.077881       0.000000       0.209977   -9999.000000       0.241700       0.065900       0.450000
57076     57076     henan          112.7900       34.7344          101       171     2012      02        06        037              0.186458       3.515594       0.000000       0.219405   -9999.000000   -9999.000000   -9999.000000       0.201000
57076     57076     henan          112.7900       34.7344          101       171     2012      02        07        038              0.182792       3.269867       0.000000       0.211589   -9999.000000       0.201900       0.050700   -9999.000000
57076     57076     henan          112.7900       34.7344          101       171     2012      02        08        039              0.179000       1.943237       0.000000       0.203665   -9999.000000       0.054600       0.091800       0.139000
57076     57076     henan          112.7900       34.7344          101       171     2012      02        09        040              0.178625       1.056305       0.000000       0.198664   -9999.000000   -9999.000000       0.062500   -9999.000000
57076     57076     henan          112.7900       34.7344          101       171     2012      02        10        041              0.180250       1.883057       0.000000       0.200522   -9999.000000       0.050100       0.085400       0.238000
57076     57076     henan          112.7900       34.7344          101       171     2012      02        11        042              0.179875       2.776672       0.000000       0.200115   -9999.000000   -9999.000000   -9999.000000   -9999.000000
57076     57076     henan          112.7900       34.7344          101       171     2012      02        12        043              0.180708       4.243408       0.000000       0.205320   -9999.000000   -9999.000000   -9999.000000   -9999.000000
57076     57076     henan          112.7900       34.7344          101       171     2012      02        13        044              0.180333       2.627899       0.000000       0.203044   -9999.000000       0.060100   -9999.000000       0.300000
57076     57076     henan          112.7900       34.7344          101       171     2012      02        14        045              0.180833       4.147766       0.000000       0.206210       0.089000   -9999.000000       0.080900   -9999.000000
57076     57076     henan          112.7900       34.7344          101       171     2012      02        15        046              0.178583       5.737640       0.604075       0.208791   -9999.000000   -9999.000000       0.054300       0.317000
57076     57076     henan          112.7900       34.7344          101       171     2012      02        16        047              0.177125       4.325226       0.000000       0.210662   -9999.000000   -9999.000000       0.070100   -9999.000000
57076     57076     henan          112.7900       34.7344          101       171     2012      02        17        048              0.175833       4.366882       0.000000       0.206830       0.083000   -9999.000000   -9999.000000       0.333000
57076     57076     henan          112.7900       34.7344          101       171     2012      02        18        049              0.174750       4.070404       1.660102       0.201422       0.098000       0.059600       0.076500       0.356000
57076     57076     henan          112.7900       34.7344          101       171     2012      02        19        050              0.174625       4.289948       0.281611       0.199780       0.094000   -9999.000000       0.034900   -9999.000000
57076     57076     henan          112.7900       34.7344          101       171     2012      02        20        051              0.176875       5.730591       0.000000       0.204013       0.103000       0.034100       0.081300       0.437000
57076     57076     henan          112.7900       34.7344          101       171     2012      02        21        052              0.176087       7.278931       0.273439       0.203677   -9999.000000       0.000100   -9999.000000   -9999.000000
57076     57076     henan          112.7900       34.7344          101       171     2012      02        22        053              0.175167       6.096191       0.000000       0.203791   -9999.000000       0.083900       0.067700       0.383000
57076     57076     henan          112.7900       34.7344          101       171     2012      02        23        054              0.172583       8.641968       0.206146       0.202806       0.110000       0.050200   -9999.000000       0.297000
57076     57076     henan          112.7900       34.7344          101       171     2012      02        24        055              0.170625       5.255341       0.000000       0.199462       0.106000   -9999.000000       0.033700       0.502000
57076     57076     henan          112.7900       34.7344          101       171     2012      02        25        056              0.167792       5.554840       0.461639       0.198620   -9999.000000       0.021800       0.079900       0.224000
57076     57076     henan          112.7900       34.7344          101       171     2012      02        26        057              0.166458       3.216339       0.116616       0.196171   -9999.000000   -9999.000000       0.051600   -9999.000000
57076     57076     henan          112.7900       34.7344          101       171     2012      02        27        058              0.166250       4.266785       0.000000       0.195435   -9999.000000       0.354500   -9999.000000       0.238000
57076     57076     henan          112.7900       34.7344          101       171     2012      02        28        059              0.165958       5.939331       0.000000       0.195626       0.088000       0.056500   -9999.000000       0.351000
57076     57076     henan          112.7900       34.7344          101       171     2012      02        29        060              0.000000   -9999.000000       0.000000   -9999.000000       0.117000   -9999.000000   -9999.000000   -9999.000000
57076     57076     henan          112.7900       34.7344          101       171     2012      03        01        061              0.164375       6.039398       2.316761       0.195054   -9999.000000   -9999.000000       0.040600       0.687000
57076     57076     henan          112.7900       34.7344          101       171     2012      03        02        062              0.165750       4.453583       0.259359       0.225607   -9999.000000       0.131400       0.095600   -9999.000000
57076     57076     henan          112.7900       34.7344          101       171     2012      03        03        063              0.165750       3.957581       0.219336       0.227449   -9999.000000   -9999.000000       0.063100       0.286000
57076     57076     henan          112.7900       34.7344          101       171     2012      03        04        064              0.167750       2.682098       0.258760       0.220761   -9999.000000       0.266500       0.072100   -9999.000000
57076     57076     henan          112.7900       34.7344          101       171     2012      03        05        065              0.170708       4.608002       0.165682       0.221785       0.120000   -9999.000000   -9999.000000       0.370000
57076     57076     henan          112.7900       34.7344          101       171     2012      03        06        066              0.170833       7.787781       0.256757       0.218636       0.118000   -9999.000000       0.089300       0.298000
57076     57076     henan          112.7900       34.7344          101       171     2012      03        07        067              0.000000       6.884705       0.148872       0.215169       0.117000       0.144400       0.051100   -9999.000000
57076     57076     henan          112.7900       34.7344          101       171     2012      03        08        068              0.168500       9.268250       0.142009       0.209957   -9999.000000   -9999.000000       0.086500       0.224000
57076     57076     henan          112.7900       34.7344          101       171     2012      03        09        069              0.167417       5.583954       0.000000       0.206229       0.106000       0.090200       0.060500   -9999.000000
57076     57076     henan          112.7900       34.7344          101       171     2012      03        10        070              0.168043       7.445343       0.075623       0.203107       0.117000       0.099600       0.070100       0.268000
57076     57076     henan          112.7900       34.7344          101       171     2012      03        11        071              0.163625      11.182129       0.558976       0.196937       0.102000       0.053900   -9999.000000   -9999.000000
57076     57076     henan          112.7900       34.7344          101       171     2012      03        12        072              0.161833       5.481934       0.000000       0.196139       0.103000       0.031600       0.039000   -9999.000000
57076     57076     henan          112.7900       34.7344          101       171     2012      03        13        073              0.164042       7.005066       0.000000       0.197424   -9999.000000   -9999.000000       0.096200       0.264000
57076     57076     henan          112.7900       34.7344          101       171     2012      03        14        074              0.161542      12.313751       0.511681       0.191898       0.119000   -9999.000000   -9999.000000   -9999.000000
57076     57076     henan          112.7900       34.7344          101       171     2012      03        15        075              0.157917      10.794495       2.624305       0.194000   -9999.000000   -9999.000000       0.110100       0.702000
57076     57076     henan          112.7900       34.7344          101       171     2012      03        16        076              0.160042       7.666656       0.000000       0.226124       0.107000   -9999.000000   -9999.000000   -9999.000000
57076     57076     henan          112.7900       34.7344          101       171     2012      03        17        077              0.159958      13.059479       0.000000       0.219805       0.106000       0.283600   -9999.000000       0.256000
57076     57076     henan          112.7900       34.7344          101       171     2012      03        18        078              0.155375      15.302917       0.129474       0.207564   -9999.000000   -9999.000000       0.051000       0.253000
57076     57076     henan          112.7900       34.7344          101       171     2012      03        19        079              0.149000       8.053131       0.119435       0.203526   -9999.000000       0.101700       0.147500   -9999.000000
57076     57076     henan          112.7900       34.7344          101       171     2012      03        20        080              0.149292       3.864380       0.223645       0.204943       0.099000       0.284200       0.106500       0.147000
57076     57076     henan          112.7900       34.7344          101       171     2012      03        21        081              0.231333       6.183136      26.935186       0.203648   -9999.000000   -9999.000000       0.216200   -9999.000000
57076     57076     henan          112.7900       34.7344          101       171     2012      03        22        082              0.256917       2.857910       0.780691       0.316635   -9999.000000       0.100400   -9999.000000       1.000000
57076     57076     henan          112.7900       34.7344          101       171     2012      03        23        083              0.239833       5.595367       0.000000       0.324062   -9999.000000   -9999.000000       0.136600       0.605000
57076     57076     henan          112.7900       34.7344          101       171     2012      03        24        084              0.229083       9.838104       0.369167       0.296848   -9999.000000   -9999.000000   -9999.000000       0.532000
57076     57076     henan          112.7900       34.7344          101       171     2012      03        25        085              0.000000      13.502289       2.000822       0.278370       0.101000       0.114500       0.154100       0.215000
57076     57076     henan          112.7900       34.7344          101       171     2012      03        26        086              0.216435      15.009644       0.000000       0.265201       0.142000   -9999.000000       0.171500   -9999.000000
57076     57076     henan          112.7900       34.7344          101       171     2012      03        27        087              0.212208      15.858276       0.000000       0.256624       0.128000       0.049100       0.162400       0.314000
57076     57076     henan          112.7900       34.7344          101       171     2012      03        28        088              0.205083      18.501862       2.520990       0.245159       0.142000       0.117900   -9999.000000       0.277000
57076     57076     henan          112.7900       34.7344          101       171     2012      03        29        089              0.201500      17.809479       0.000000       0.252660       0.150000   -9999.000000       0.085200       0.502000
57076     57076     henan          112.7900       34.7344          101       171     2012      03        30        090              0.191292      18.511322       0.000000       0.255108   -9999.000000   -9999.000000       0.181900       0.080000
57076     57076     henan          112.7900       34.7344          101       171     2012      03        31        091              0.182458      15.283112       0.000000       0.239038       0.126000   -9999.000000       0.128600   -9999.000000
57076     57076     henan          112.7900       34.7344          101       171     2012      04        01        092              0.174958      17.194122       0.000000       0.224740       0.137000       0.066300       0.153000       0.203000
57076     57076     henan          112.7900       34.7344          101       171     2012      04        02        093              0.165750      17.407196       0.568467       0.217212       0.149000   -9999.000000   -9999.000000   -9999.000000
57076     57076     henan          112.7900       34.7344          101       171     2012      04        03        094              0.161042      12.200745       0.000000       0.217580       0.179000   -9999.000000   -9999.000000       0.174000
57076     57076     henan          112.7900       34.7344          101       171     2012      04        04        095              0.155917      15.475616       0.000000       0.211715       0.151000       0.004200       0.095900       0.041000
57076     57076     henan          112.7900       34.7344          101       171     2012      04        05        096              0.148208      18.491028       0.000000       0.204003       0.142500   -9999.000000       0.216200   -9999.000000
57076     57076     henan          112.7900       34.7344          101       171     2012      04        06        097              0.141750      19.950043       0.000000       0.195851       0.150000   -9999.000000       0.154500       0.128000
57076     57076     henan          112.7900       34.7344          101       171     2012      04        07        098              0.135000      20.868652       0.000000       0.189839       0.132000       0.075400       0.178800   -9999.000000
57076     57076     henan          112.7900       34.7344          101       171     2012      04        08        099              0.128792      21.670258       0.000000       0.185788   -9999.000000   -9999.000000   -9999.000000       0.257000
57076     57076     henan          112.7900       34.7344          101       171     2012      04        09        100              0.121083      23.706940       0.861003       0.182010       0.185000       0.341500       0.229600   -9999.000000
57076     57076     henan          112.7900       34.7344          101       171     2012      04        10        101              0.121875      18.735992       0.000000       0.193888       0.140000   -9999.000000       0.211500   -9999.000000
57076     57076     henan          112.7900       34.7344          101       171     2012      04        11        102              0.120167      21.078247       4.058607       0.193160       0.181500   -9999.000000       0.318100       0.239000
57076     57076     henan          112.7900       34.7344          101       171     2012      04        12        103              0.118417      18.632446       0.421598       0.203237       0.201000   -9999.000000       0.250200   -9999.000000
57076     57076     henan          112.7900       34.7344          101       171     2012      04        13        104              0.125292      14.585846       0.000000       0.242353   -9999.000000   -9999.000000       0.226300       0.293000
57076     57076     henan          112.7900       34.7344          101       171     2012      04        14        105              0.125417      20.182800       0.255482       0.214222       0.207000       0.029800   -9999.000000   -9999.000000
57076     57076     henan          112.7900       34.7344          101       171     2012      04        15        106              0.126792      19.492920       0.000000       0.199610       0.144000       0.094100       0.106900       0.214000
57076     57076     henan          112.7900       34.7344          101       171     2012      04        16        107              0.126833      21.449371       0.000000       0.189942       0.175000   -9999.000000       0.188400       0.289000
57076     57076     henan          112.7900       34.7344          101       171     2012      04        17        108              0.126125      19.746704       0.000000       0.185321       0.162000       0.242500       0.145900   -9999.000000
57076     57076     henan          112.7900       34.7344          101       171     2012      04        18        109              0.125458      21.128204       0.000000       0.182440       0.163000   -9999.000000   -9999.000000       0.208000
57076     57076     henan          112.7900       34.7344          101       171     2012      04        19        110              0.124875      23.216309       5.344607       0.178625       0.229000   -9999.000000   -9999.000000   -9999.000000
57076     57076     henan          112.7900       34.7344          101       171     2012      04        20        111              0.120208      23.949219       1.460767       0.211759       0.207000       0.098000       0.226600       0.401000
57076     57076     henan          112.7900       34.7344          101       171     2012      04        21        112              0.118125      21.062225       0.000000       0.241717       0.177000       0.168500       0.104300       0.186000
57076     57076     henan          112.7900       34.7344          101       171     2012      04        22        113              0.117750      20.321777       0.000000       0.232278       0.176000       0.100700       0.209400       0.226000
57076     57076     henan          112.7900       34.7344          101       171     2012      04        23        114              0.115250      24.186493       0.300781       0.210832       0.144000   -9999.000000       0.191300       0.278000
57076     57076     henan          112.7900       34.7344          101       171     2012      04        24        115              0.112333      25.746582       3.299487       0.196560       0.228000   -9999.000000       0.283600   -9999.000000
57076     57076     henan          112.7900       34.7344          101       171     2012      04        25        116              0.000000      18.846527       0.304932       0.227419       0.192000       0.344600   -9999.000000       0.189000
57076     57076     henan          112.7900       34.7344          101       171     2012      04        26        117              0.121875      19.575409       0.124023       0.214977       0.146500   -9999.000000       0.159600       0.337000
57076     57076     henan          112.7900       34.7344          101       171     2012      04        27        118              0.123458      23.576233       0.063750       0.195607       0.146000       0.390100   -9999.000000       0.272000
57076     57076     henan          112.7900       34.7344          101       171     2012      04        28        119              0.121667      26.197449       0.000000       0.182154       0.134000   -9999.000000       0.243000       0.045000
57076     57076     henan          112.7900       34.7344          101       171     2012      04        29        120              0.120625      23.087830       0.000000       0.177277   -9999.000000       0.181700       0.223600   -9999.000000
57076     57076     henan          112.7900       34.7344          101       171     2012      04        30        121              0.116292      24.201874       0.000000       0.173884       0.195000       0.109000   -9999.000000       0.168000
57076     57076     henan          112.7900       34.7344          101       171     2012      05        01        122              0.115125      21.941101       0.465824       0.175419       0.167000   -9999.000000   -9999.000000   -9999.000000
57076     57076     henan          112.7900       34.7344          101       171     2012      05        02        123              0.111917      25.456543       0.000000       0.173641       0.179000   -9999.000000       0.079500       0.260000
57076     57076     henan          112.7900       34.7344          101       171     2012      05        03        124              0.106708      27.438538       0.000000       0.170410       0.165000       0.072200       0.202300       0.164000
57076     57076     henan          112.7900       34.7344          101       171     2012      05        04        125              0.102917      27.194275       0.000000       0.168708       0.182000       0.233000       0.147400   -9999.000000
57076     57076     henan          112.7900       34.7344          101       171     2012      05        05        126              0.097700      28.661804       0.000000       0.166372       0.210000   -9999.000000       0.185300       0.166000
57076     57076     henan          112.7900       34.7344          101       171     2012      05        06        127              0.094708      29.293396       0.000000       0.165944       0.160500   -9999.000000   -9999.000000   -9999.000000
57076     57076     henan          112.7900       34.7344          101       171     2012      05        07        128              0.089750      30.379395       2.479903       0.164958   -9999.000000       0.037500       0.160300       0.475000
57076     57076     henan          112.7900       34.7344          101       171     2012      05        08        129              0.091958      23.526306       0.000000       0.196604       0.157000       0.117800       0.076400   -9999.000000
57076     57076     henan          112.7900       34.7344          101       171     2012      05        09        130              0.091625      27.593384       0.000000       0.181767       0.170000   -9999.000000       0.157600   -9999.000000
57076     57076     henan          112.7900       34.7344          101       171     2012      05        10        131              0.092958      28.492035       0.000000       0.172021       0.209000       0.151700       0.113600       0.461000
57076     57076     henan          112.7900       34.7344          101       171     2012      05        11        132              0.103542      30.111328       6.125832       0.167139       0.261000   -9999.000000       0.144700   -9999.000000
57076     57076     henan          112.7900       34.7344          101       171     2012      05        12        133              0.162042      25.935211       0.000000       0.205596       0.197000   -9999.000000   -9999.000000       0.494000
57076     57076     henan          112.7900       34.7344          101       171     2012      05        13        134              0.159458      20.624359       0.000000       0.225985       0.176500       0.100700       0.094700   -9999.000000
57076     57076     henan          112.7900       34.7344          101       171     2012      05        14        135              0.155250      23.256927       0.000000       0.200275       0.148000   -9999.000000       0.206400       0.403000
57076     57076     henan          112.7900       34.7344          101       171     2012      05        15        136              0.149167      25.348053       0.000000       0.181376       0.222000       0.102400       0.149300       0.286000
57076     57076     henan          112.7900       34.7344          101       171     2012      05        16        137              0.143542      26.489258       0.000000       0.170969       0.180000   -9999.000000       0.190700   -9999.000000
57076     57076     henan          112.7900       34.7344          101       171     2012      05        17        138              0.138042      27.493683       0.000000       0.167424       0.153000   -9999.000000   -9999.000000       0.257000
57076     57076     henan          112.7900       34.7344          101       171     2012      05        18        139              0.130000      29.219269       0.000000       0.164887       0.172500       0.220500   -9999.000000   -9999.000000
57076     57076     henan          112.7900       34.7344          101       171     2012      05        19        140              0.129625      27.505066       0.000000       0.165727       0.147000   -9999.000000       0.076200       0.389000
57076     57076     henan          112.7900       34.7344          101       171     2012      05        20        141              0.124792      30.364655       0.000000       0.163826   -9999.000000       0.143300       0.219100       0.448000
57076     57076     henan          112.7900       34.7344          101       171     2012      05        21        142              0.118333      29.513306       0.000000       0.162808       0.162000   -9999.000000       0.119800       0.357000
57076     57076     henan          112.7900       34.7344          101       171     2012      05        22        143              0.113125      25.595551       1.107728       0.164162       0.219000   -9999.000000       0.160300       0.433000
57076     57076     henan          112.7900       34.7344          101       171     2012      05        23        144              0.112792      23.052612       0.000000       0.177949   -9999.000000       0.196500   -9999.000000   -9999.000000
57076     57076     henan          112.7900       34.7344          101       171     2012      05        24        145              0.110333      25.185577       0.000000       0.170628       0.141000   -9999.000000       0.159700       0.355000
57076     57076     henan          112.7900       34.7344          101       171     2012      05        25        146              0.000000      24.755157       0.000000       0.164796       0.128000       0.077500       0.079800       0.476000
57076     57076     henan          112.7900       34.7344          101       171     2012      05        26        147              0.109750      27.541840       0.000000       0.161398       0.177000       0.070200       0.158400       0.496000
57076     57076     henan          112.7900       34.7344          101       171     2012      05        27        148              0.106708      30.578705       0.000000       0.158865       0.150500   -9999.000000       0.111900       0.261000
57076     57076     henan          112.7900       34.7344          101       171     2012      05        28        149              0.101708      31.708923       0.517184       0.158006       0.129000       0.108200       0.138200   -9999.000000
57076     57076     henan          112.7900       34.7344          101       171     2012      05        29        150              0.096292      29.998138       1.376523       0.160718       0.167000   -9999.000000   -9999.000000       0.344000
57076     57076     henan          112.7900       34.7344          101       171     2012      05        30        151              0.098542      24.658173       0.000000       0.180942       0.137000       0.374000       0.085700   -9999.000000
57076     57076     henan          112.7900       34.7344          101       171     2012      05        31        152              0.095625      28.413818       0.000000       0.164801       0.164000       0.078400   -9999.000000   -9999.000000
57076     57076     henan          112.7900       34.7344          101       171     2012      06        01        153              0.094458      27.490692       0.000000       0.161007       0.098000   -9999.000000       0.126600       0.221000
57076     57076     henan          112.7900       34.7344          101       171     2012      06        02        154              0.092292      29.240021       0.000000       0.159236       0.097500       0.151200       0.137000   -9999.000000
57076     57076     henan          112.7900       34.7344          101       171     2012      06        03        155              0.088750      30.900574       0.000000       0.157535       0.104000   -9999.000000   -9999.000000       0.435000
57076     57076     henan          112.7900       34.7344          101       171     2012      06        04        156              0.087708      30.178619       0.000000       0.157243       0.089000       0.206600   -9999.000000   -9999.000000
57076     57076     henan          112.7900       34.7344          101       171     2012      06        05        157              0.085125      32.068451       2.777767       0.156584   -9999.000000       0.111300       0.053300       0.422000
57076     57076     henan          112.7900       34.7344          101       171     2012      06        06        158              0.083000      30.671265       5.397627       0.178929       0.123000   -9999.000000       0.114000   -9999.000000
57076     57076     henan          112.7900       34.7344          101       171     2012      06        07        159              0.082750      27.128571       0.000000       0.181667       0.099500       0.319900       0.083100   -9999.000000
57076     57076     henan          112.7900       34.7344          101       171     2012      06        08        160              0.081667      32.253601       0.000000       0.164302       0.099000   -9999.000000       0.098800       0.550000
57076     57076     henan          112.7900       34.7344          101       171     2012      06        09        161              0.082000      32.565765       0.000000       0.159474       0.095000   -9999.000000   -9999.000000   -9999.000000
57076     57076     henan          112.7900       34.7344          101       171     2012      06        10        162              0.079375      35.080048       0.000000       0.157037   -9999.000000       0.124800       0.109600       0.467000
57076     57076     henan          112.7900       34.7344          101       171     2012      06        11        163              0.000000      32.241547       0.000000       0.157346       0.132000   -9999.000000       0.066300   -9999.000000
57076     57076     henan          112.7900       34.7344          101       171     2012      06        12        164              0.076917      32.830627       0.000000       0.155304       0.110000       0.106600       0.107400       0.591000
57076     57076     henan          112.7900       34.7344          101       171     2012      06        13        165              0.075750      34.789459       0.000000       0.153955       0.098500       0.078100       0.096300       0.527000
57076     57076     henan          112.7900       34.7344          101       171     2012      06        14        166              0.073458      37.200806       0.000000       0.153472       0.106000   -9999.000000       0.093700   -9999.000000
57076     57076     henan          112.7900       34.7344          101       171     2012      06        15        167              0.072542      34.433685       0.000000       0.153436       0.099000       0.148600   -9999.000000       0.448000
57076     57076     henan          112.7900       34.7344          101       171     2012      06        16        168              0.072083      34.202393       0.000000       0.153462       0.131000   -9999.000000       0.043700   -9999.000000
57076     57076     henan          112.7900       34.7344          101       171     2012      06        17        169              0.071333      34.471588       0.000000       0.153120       0.167000   -9999.000000       0.108300       0.679000
57076     57076     henan          112.7900       34.7344          101       171     2012      06        18        170              0.070958      35.070374       0.000000       0.152896       0.130000       0.147400       0.068900       0.541000
57076     57076     henan          112.7900       34.7344          101       171     2012      06        19        171              0.070000      35.576965       0.000000       0.152962       0.108000   -9999.000000       0.083800       0.549000
57076     57076     henan          112.7900       34.7344          101       171     2012      06        20        172              0.069417      35.407623       0.000000       0.153497       0.107000       0.157900   -9999.000000       0.393000
57076     57076     henan          112.7900       34.7344          101       171     2012      06        21        173              0.069167      34.008270       0.000000       0.153633       0.135000   -9999.000000   -9999.000000   -9999.000000
57076     57076     henan          112.7900       34.7344          101       171     2012      06        22        174              0.069083      35.460602       0.000000       0.152724       0.126000       0.401100       0.041000       0.371000
57076     57076     henan          112.7900       34.7344          101       171     2012      06        23        175              0.067750      36.786377       3.137037       0.152901       0.130000       0.072100       0.100800       0.838000
57076     57076     henan          112.7900       34.7344          101       171     2012      06        24        176              0.068542      33.235596      21.827803       0.183287       0.147000   -9999.000000       0.071400       0.603000
57076     57076     henan          112.7900       34.7344          101       171     2012      06        25        177              0.198750      30.306335      43.082157       0.294626   -9999.000000       0.144100       0.137700       0.960000
57076     57076     henan          112.7900       34.7344          101       171     2012      06        26        178              0.230905      25.503845       0.523328       0.387502   -9999.000000   -9999.000000   -9999.000000   -9999.000000
57076     57076     henan          112.7900       34.7344          101       171     2012      06        27        179              0.213667      28.044556       0.239630       0.319571       0.176000       0.416700       0.106700       0.672000
57076     57076     henan          112.7900       34.7344          101       171     2012      06        28        180              0.202667      26.851379       0.612505       0.296818       0.176000       0.273600       0.110800   -9999.000000
57076     57076     henan          112.7900       34.7344          101       171     2012      06        29        181              0.205917      25.595520       1.720209       0.289094       0.184000   -9999.000000       0.125300       0.829000
57076     57076     henan          112.7900       34.7344          101       171     2012      06        30        182              0.206708      26.358521       0.000000       0.290557       0.139000       0.228500       0.116800   -9999.000000
57076     57076     henan          112.7900       34.7344          101       171     2012      07        01        183              0.200458      30.328918       0.000000       0.266727   -9999.000000       0.072500       0.112900   -9999.000000
57076     57076     henan          112.7900       34.7344          101       171     2012      07        02        184              0.187958      31.666840       0.943953       0.244001       0.187000   -9999.000000   -9999.000000       0.590000
57076     57076     henan          112.7900       34.7344          101       171     2012      07        03        185              0.190167      28.176880       0.333607       0.246444       0.139000       0.172000       0.045300   -9999.000000
57076     57076     henan          112.7900       34.7344          101       171     2012      07        04        186              0.222000      32.148773      12.803665       0.228651       0.208500   -9999.000000       0.129300       1.000000
57076     57076     henan          112.7900       34.7344          101       171     2012      07        05        187              0.225167      26.773438       0.000000       0.308275       0.168000       0.084200       0.099100   -9999.000000
57076     57076     henan          112.7900       34.7344          101       171     2012      07        06        188              0.212250      28.859497       0.184749       0.280050   -9999.000000       0.149600       0.112400   -9999.000000
57076     57076     henan          112.7900       34.7344          101       171     2012      07        07        189              0.199958      30.222626       1.498790       0.255170   -9999.000000       0.511000   -9999.000000       0.701000
57076     57076     henan          112.7900       34.7344          101       171     2012      07        08        190              0.207958      28.141327      44.475967       0.257537   -9999.000000       0.291700       0.106600   -9999.000000
57076     57076     henan          112.7900       34.7344          101       171     2012      07        09        191              0.266667      28.725586      12.590728       0.297864       0.202000   -9999.000000       0.094200       0.970000
57076     57076     henan          112.7900       34.7344          101       171     2012      07        10        192              0.239417      27.539276       0.000000       0.370400       0.179500   -9999.000000       0.151500   -9999.000000
57076     57076     henan          112.7900       34.7344          101       171     2012      07        11        193              0.227708      31.223358       0.000000       0.332459       0.156000       0.278300       0.109600       0.946000
57076     57076     henan          112.7900       34.7344          101       171     2012      07        12        194              0.216458      32.454071       0.000000       0.312716   -9999.000000   -9999.000000       0.121700       0.679000
57076     57076     henan          112.7900       34.7344          101       171     2012      07        13        195              0.201208      32.683319       0.359822       0.294426   -9999.000000   -9999.000000   -9999.000000   -9999.000000
57076     57076     henan          112.7900       34.7344          101       171     2012      07        14        196              0.191208      29.026398       4.054723       0.284868       0.159000   -9999.000000       0.094500       0.661000
57076     57076     henan          112.7900       34.7344          101       171     2012      07        15        197              0.186167      26.062164       0.000000       0.303377       0.172000   -9999.000000       0.117300   -9999.000000
57076     57076     henan          112.7900       34.7344          101       171     2012      07        16        198              0.179417      28.355499       0.000000       0.283356       0.156000       0.116800       0.138300       0.832000
57076     57076     henan          112.7900       34.7344          101       171     2012      07        17        199              0.170125      28.592499       0.000000       0.268447       0.157000   -9999.000000       0.115800       0.725000
57076     57076     henan          112.7900       34.7344          101       171     2012      07        18        200              0.162542      29.488861       0.000000       0.256269       0.174000       0.031700   -9999.000000       0.754000
57076     57076     henan          112.7900       34.7344          101       171     2012      07        19        201              0.154500      30.812225       0.000000       0.244987       0.137000       0.179100   -9999.000000       0.584000
57076     57076     henan          112.7900       34.7344          101       171     2012      07        20        202              0.146708      31.896545       0.532636       0.235060       0.162000       0.281900       0.055900   -9999.000000
57076     57076     henan          112.7900       34.7344          101       171     2012      07        21        203              0.137667      33.007843       2.520445       0.227321       0.180000       0.142500       0.141000       0.630000
57076     57076     henan          112.7900       34.7344          101       171     2012      07        22        204              0.128458      32.069885       0.000000       0.235171       0.181000   -9999.000000       0.092800       0.634000
57076     57076     henan          112.7900       34.7344          101       171     2012      07        23        205              0.123208      30.820557       0.000000       0.232816       0.214000   -9999.000000       0.128000       0.740000
57076     57076     henan          112.7900       34.7344          101       171     2012      07        24        206              0.114625      32.363647       1.719834       0.216694       0.259000       0.142600   -9999.000000       0.583000
57076     57076     henan          112.7900       34.7344          101       171     2012      07        25        207              0.109625      32.418518       0.000000       0.211691       0.192500   -9999.000000       0.158700   -9999.000000
57076     57076     henan          112.7900       34.7344          101       171     2012      07        26        208              0.106458      34.041260       0.000000       0.206961       0.199000       0.128200       0.085000       0.620000
57076     57076     henan          112.7900       34.7344          101       171     2012      07        27        209              0.101250      36.446198       0.000000       0.196986       0.170000   -9999.000000       0.141900   -9999.000000
57076     57076     henan          112.7900       34.7344          101       171     2012      07        28        210              0.096333      36.273651       0.000000       0.190141   -9999.000000   -9999.000000       0.112400       0.628000
57076     57076     henan          112.7900       34.7344          101       171     2012      07        29        211              0.092792      36.975433       0.000000       0.185630       0.225000       0.053500       0.128300       0.519000
57076     57076     henan          112.7900       34.7344          101       171     2012      07        30        212              0.089083      36.740051      15.657448       0.183460       0.128000   -9999.000000   -9999.000000   -9999.000000
57076     57076     henan          112.7900       34.7344          101       171     2012      07        31        213              0.085500      35.128387       1.135956       0.234181       0.237000       0.276800       0.085800       0.731000
57076     57076     henan          112.7900       34.7344          101       171     2012      08        01        214              0.084583      28.558899       1.076224       0.295328       0.221000   -9999.000000       0.118100   -9999.000000
57076     57076     henan          112.7900       34.7344          101       171     2012      08        02        215              0.085478      27.385406       0.000000       0.278152       0.214000   -9999.000000       0.077000       0.580000
57076     57076     henan          112.7900       34.7344          101       171     2012      08        03        216              0.086125      29.892975       0.000000       0.254176       0.253000       0.024300       0.091600   -9999.000000
57076     57076     henan          112.7900       34.7344          101       171     2012      08        04        217              0.084708      30.888733       4.904019       0.235890       0.288000   -9999.000000   -9999.000000   -9999.000000
57076     57076     henan          112.7900       34.7344          101       171     2012      08        05        218              0.086208      30.114838       9.195364       0.247450       0.250000       0.226600   -9999.000000       0.932000
57076     57076     henan          112.7900       34.7344          101       171     2012      08        06        219              0.093000      27.359009       0.000000       0.312676       0.235500   -9999.000000       0.081600   -9999.000000
57076     57076     henan          112.7900       34.7344          101       171     2012      08        07        220              0.094417      29.756378       0.000000       0.276117       0.185000   -9999.000000       0.077500       0.652000
57076     57076     henan          112.7900       34.7344          101       171     2012      08        08        221              0.095208      31.107574       0.000000       0.252322   -9999.000000   -9999.000000       0.120900   -9999.000000
57076     57076     henan          112.7900       34.7344          101       171     2012      08        09        222              0.098583      31.756744       4.005774       0.234055       0.238000   -9999.000000       0.152900       0.852000
57076     57076     henan          112.7900       34.7344          101       171     2012      08        10        223              0.101304      29.907318       0.000000       0.253361       0.173500   -9999.000000   -9999.000000       0.555000
57076     57076     henan          112.7900       34.7344          101       171     2012      08        11        224              0.099625      31.058502       0.000000       0.232854       0.206000   -9999.000000       0.170500   -9999.000000
57076     57076     henan          112.7900       34.7344          101       171     2012      08        12        225              0.101458      31.979279      30.077478       0.218036       0.179000       0.168600       0.141300       1.000000
57076     57076     henan          112.7900       34.7344          101       171     2012      08        13        226              0.171792      30.931763       4.907485       0.272358       0.301000       0.296400       0.123800   -9999.000000
57076     57076     henan          112.7900       34.7344          101       171     2012      08        14        227              0.176583      25.254578       0.329275       0.339647       0.260000   -9999.000000       0.107700       0.951000
57076     57076     henan          112.7900       34.7344          101       171     2012      08        15        228              0.172667      25.877319      21.984432       0.311239       0.253000   -9999.000000       0.096300       0.705000
57076     57076     henan          112.7900       34.7344          101       171     2012      08        16        229              0.161500      28.545593       0.000000       0.290622       0.227000   -9999.000000   -9999.000000       0.717000
57076     57076     henan          112.7900       34.7344          101       171     2012      08        17        230              0.153958      28.301697       0.000000       0.274603       0.236500   -9999.000000       0.059300       0.584000
57076     57076     henan          112.7900       34.7344          101       171     2012      08        18        231              0.146250      29.529388       0.000000       0.262319       0.222000       0.142000       0.114300   -9999.000000
57076     57076     henan          112.7900       34.7344          101       171     2012      08        19        232              0.145833      28.944702      34.676094       0.253797   -9999.000000   -9999.000000       0.080600       0.845000
57076     57076     henan          112.7900       34.7344          101       171     2012      08        20        233              0.248917      27.642548      10.330209       0.304707       0.263000   -9999.000000       0.213800       0.875000
57076     57076     henan          112.7900       34.7344          101       171     2012      08        21        234              0.225125      26.034821       1.640079       0.363569       0.199000   -9999.000000   -9999.000000       0.856000
57076     57076     henan          112.7900       34.7344          101       171     2012      08        22        235              0.207167      26.512634       0.000000       0.336158       0.201500   -9999.000000   -9999.000000   -9999.000000
57076     57076     henan          112.7900       34.7344          101       171     2012      08        23        236              0.193750      24.735229       0.000000       0.316051       0.173000       0.145300       0.091700   -9999.000000
57076     57076     henan          112.7900       34.7344          101       171     2012      08        24        237              0.185625      24.399902       0.000000       0.302169   -9999.000000   -9999.000000       0.192400       0.855000
57076     57076     henan          112.7900       34.7344          101       171     2012      08        25        238              0.000000      25.464783       0.158763       0.291689       0.246000   -9999.000000       0.140800   -9999.000000
57076     57076     henan          112.7900       34.7344          101       171     2012      08        26        239              0.176667      25.900940       0.000000       0.284225       0.185000   -9999.000000       0.168600       0.571000
57076     57076     henan          112.7900       34.7344          101       171     2012      08        27        240              0.172000      27.043365       0.000000       0.275179       0.235500   -9999.000000   -9999.000000       0.553000
57076     57076     henan          112.7900       34.7344          101       171     2012      08        28        241              0.169792      27.193329       0.000000       0.267395       0.167000       0.104900       0.148600   -9999.000000
57076     57076     henan          112.7900       34.7344          101       171     2012      08        29        242              0.165542      28.877289       0.000000       0.257557       0.172000       0.133000       0.137500       0.610000
57076     57076     henan          112.7900       34.7344          101       171     2012      08        30        243              0.159208      30.724182       0.000000       0.242950       0.228000   -9999.000000       0.182300   -9999.000000
57076     57076     henan          112.7900       34.7344          101       171     2012      08        31        244              0.153500      30.459900       6.087694       0.234368       0.302000       0.077100       0.187800       1.000000
57076     57076     henan          112.7900       34.7344          101       171     2012      09        01        245              0.160792      26.695068      16.273043       0.279420       0.203000   -9999.000000       0.185100   -9999.000000
57076     57076     henan          112.7900       34.7344          101       171     2012      09        02        246              0.176375      25.019135       0.000000       0.332957       0.190000       0.134700   -9999.000000   -9999.000000
57076     57076     henan          112.7900       34.7344          101       171     2012      09        03        247              0.173000      24.147736       1.293935       0.313041       0.157000       0.120900       0.081800       0.586000
57076     57076     henan          112.7900       34.7344          101       171     2012      09        04        248              0.165792      25.857635       0.000000       0.289531   -9999.000000       0.241600       0.168300   -9999.000000
57076     57076     henan          112.7900       34.7344          101       171     2012      09        05        249              0.154167      25.468109       0.299297       0.275683       0.213000       0.124000       0.116600       0.665000
57076     57076     henan          112.7900       34.7344          101       171     2012      09        06        250              0.145958      26.774994       0.181476       0.263859       0.164000   -9999.000000       0.148400   -9999.000000
57076     57076     henan          112.7900       34.7344          101       171     2012      09        07        251              0.144458      25.190887       3.025173       0.258542       0.187500   -9999.000000   -9999.000000       0.632000
57076     57076     henan          112.7900       34.7344          101       171     2012      09        08        252              0.145458      26.365753       1.313604       0.256075       0.197000       0.205900       0.170200       0.794000
57076     57076     henan          112.7900       34.7344          101       171     2012      09        09        253              0.146083      24.592316       0.000000       0.269669       0.179000   -9999.000000       0.087400   -9999.000000
57076     57076     henan          112.7900       34.7344          101       171     2012      09        10        254              0.151167      25.970612      29.725613       0.251037   -9999.000000       0.203400       0.214400       0.892000
57076     57076     henan          112.7900       34.7344          101       171     2012      09        11        255              0.250833      24.824463      15.019012       0.292213       0.204000       0.116000       0.172800   -9999.000000
57076     57076     henan          112.7900       34.7344          101       171     2012      09        12        256              0.222042      22.447937       0.000000       0.366292       0.184000       0.456700       0.201200       1.000000
57076     57076     henan          112.7900       34.7344          101       171     2012      09        13        257              0.207875      19.253693       0.000000       0.335387       0.151000       0.181600   -9999.000000       0.722000
57076     57076     henan          112.7900       34.7344          101       171     2012      09        14        258              0.197333      20.774323       0.000000       0.318526       0.148000   -9999.000000       0.151300       0.819000
57076     57076     henan          112.7900       34.7344          101       171     2012      09        15        259              0.189750      22.145630       0.000000       0.307184   -9999.000000       0.037800       0.166400       0.531000
57076     57076     henan          112.7900       34.7344          101       171     2012      09        16        260              0.183292      21.962463       0.000000       0.297672       0.194000       0.163000       0.209200   -9999.000000
57076     57076     henan          112.7900       34.7344          101       171     2012      09        17        261              0.178375      21.841522       0.000000       0.289329       0.148000       0.258400       0.148500       0.534000
57076     57076     henan          112.7900       34.7344          101       171     2012      09        18        262              0.174333      22.868042       2.291762       0.281859       0.182000       0.072900       0.157700       0.586000
57076     57076     henan          112.7900       34.7344          101       171     2012      09        19        263              0.170250      23.209473       0.546869       0.276807       0.148000   -9999.000000   -9999.000000       0.718000
57076     57076     henan          112.7900       34.7344          101       171     2012      09        20        264              0.166417      22.655792       0.207297       0.273826   -9999.000000       0.245600       0.067400       0.500000
57076     57076     henan          112.7900       34.7344          101       171     2012      09        21        265              0.162375      22.969818       0.000000       0.268977   -9999.000000       0.065100       0.178900   -9999.000000
57076     57076     henan          112.7900       34.7344          101       171     2012      09        22        266              0.163167      21.670288       0.000000       0.269366       0.137000       0.358400       0.124100       0.598000
57076     57076     henan          112.7900       34.7344          101       171     2012      09        23        267              0.162000      24.254883       0.000000       0.260924       0.150500       0.186700       0.154900   -9999.000000
57076     57076     henan          112.7900       34.7344          101       171     2012      09        24        268              0.160542      24.487854       0.000000       0.254208       0.132000   -9999.000000   -9999.000000       0.594000
57076     57076     henan          112.7900       34.7344          101       171     2012      09        25        269              0.156125      24.003571       3.409335       0.247338       0.149000       0.102100       0.216200       0.780000
57076     57076     henan          112.7900       34.7344          101       171     2012      09        26        270              0.153792      22.822418       0.946656       0.271091       0.171000       0.131900       0.119300   -9999.000000
57076     57076     henan          112.7900       34.7344          101       171     2012      09        27        271              0.157929      21.854248       0.000000       0.277600       0.163000   -9999.000000       0.201700       0.632000
57076     57076     henan          112.7900       34.7344          101       171     2012      09        28        272              0.150067      22.536957       0.000000       0.261446       0.130500   -9999.000000       0.150600   -9999.000000
57076     57076     henan          112.7900       34.7344          101       171     2012      09        29        273              0.149792      19.879852       0.307583       0.246755       0.133000   -9999.000000       0.179800       0.504000
57076     57076     henan          112.7900       34.7344          101       171     2012      09        30        274              0.148167      20.273834       0.000000       0.240270       0.117000   -9999.000000   -9999.000000   -9999.000000
57076     57076     henan          112.7900       34.7344          101       171     2012      10        01        275              0.146208      20.678467       0.000000       0.231769   -9999.000000       0.247000       0.066800   -9999.000000
57076     57076     henan          112.7900       34.7344          101       171     2012      10        02        276              0.144625      21.877319       0.000000       0.224146       0.139000   -9999.000000       0.109300       0.521000
57076     57076     henan          112.7900       34.7344          101       171     2012      10        03        277              0.142250      23.055420       0.000000       0.219278       0.107000       0.095300       0.084300   -9999.000000
57076     57076     henan          112.7900       34.7344          101       171     2012      10        04        278              0.136417      24.304291       0.948166       0.213718       0.132000       0.016500       0.101500       0.614000
57076     57076     henan          112.7900       34.7344          101       171     2012      10        05        279              0.133292      22.057861       0.000000       0.213945       0.107000       0.244000   -9999.000000   -9999.000000
57076     57076     henan          112.7900       34.7344          101       171     2012      10        06        280              0.131500      22.032776       0.000000       0.220031       0.117000       0.149000   -9999.000000       0.622000
57076     57076     henan          112.7900       34.7344          101       171     2012      10        07        281              0.128375      21.840576       0.000000       0.212872       0.139000   -9999.000000       0.020700       0.651000
57076     57076     henan          112.7900       34.7344          101       171     2012      10        08        282              0.127250      20.708160       0.000000       0.211271       0.163000       0.162600       0.100000   -9999.000000
57076     57076     henan          112.7900       34.7344          101       171     2012      10        09        283              0.125042      22.014099       0.271615       0.209644       0.120000       0.075800       0.060700       0.446000
57076     57076     henan          112.7900       34.7344          101       171     2012      10        10        284              0.121792      21.464905       0.000000       0.201982       0.126000       0.160100       0.082300   -9999.000000
57076     57076     henan          112.7900       34.7344          101       171     2012      10        11        285              0.120458      20.109283       0.000000       0.197202       0.102000       0.317200   -9999.000000       0.636000
57076     57076     henan          112.7900       34.7344          101       171     2012      10        12        286              0.118458      20.816345       0.000000       0.196211   -9999.000000   -9999.000000       0.096500       0.484000
57076     57076     henan          112.7900       34.7344          101       171     2012      10        13        287              0.118375      20.761475       0.000000       0.198069       0.133000   -9999.000000       0.057400       0.615000
57076     57076     henan          112.7900       34.7344          101       171     2012      10        14        288              0.115167      22.340057       0.000000       0.195651       0.104000       0.243600       0.106500       0.406000
57076     57076     henan          112.7900       34.7344          101       171     2012      10        15        289              0.115792      20.751099       8.239998       0.192643       0.162000   -9999.000000       0.067900   -9999.000000
57076     57076     henan          112.7900       34.7344          101       171     2012      10        16        290              0.131958      18.560516       0.446178       0.248860       0.124000   -9999.000000       0.084600       0.631000
57076     57076     henan          112.7900       34.7344          101       171     2012      10        17        291              0.133792      15.679810       3.654278       0.267134   -9999.000000   -9999.000000   -9999.000000       0.547000
57076     57076     henan          112.7900       34.7344          101       171     2012      10        18        292              0.135042      15.885071       0.000000       0.255065       0.139000       0.107600       0.043800       0.559000
57076     57076     henan          112.7900       34.7344          101       171     2012      10        19        293              0.134708      17.217102       0.000000       0.271794       0.114500       0.151800       0.098200       0.341000
57076     57076     henan          112.7900       34.7344          101       171     2012      10        20        294              0.134250      18.042084       0.000000       0.254341       0.122500   -9999.000000       0.058100   -9999.000000
57076     57076     henan          112.7900       34.7344          101       171     2012      10        21        295              0.131750      19.699158       3.595995       0.244350       0.135000       0.116100       0.099800       0.859000
57076     57076     henan          112.7900       34.7344          101       171     2012      10        22        296              0.135083      15.707031       0.000000       0.266885   -9999.000000       0.137300   -9999.000000   -9999.000000
57076     57076     henan          112.7900       34.7344          101       171     2012      10        23        297              0.135583      15.277161       0.042769       0.258270   -9999.000000       0.183800   -9999.000000       0.488000
57076     57076     henan          112.7900       34.7344          101       171     2012      10        24        298              0.134750      15.178192       0.000000       0.250013   -9999.000000       0.119400       0.030100       0.354000
57076     57076     henan          112.7900       34.7344          101       171     2012      10        25        299              0.000000      16.361877       0.326036       0.243679       0.125500   -9999.000000       0.102000   -9999.000000
57076     57076     henan          112.7900       34.7344          101       171     2012      10        26        300              0.131042      17.367218       0.094200       0.237638       0.142500       0.087400       0.057500       0.470000
57076     57076     henan          112.7900       34.7344          101       171     2012      10        27        301              0.129500      16.405029       1.242812       0.238937       0.112000       0.128500       0.073700   -9999.000000
57076     57076     henan          112.7900       34.7344          101       171     2012      10        28        302              0.000000      17.982666       5.823761       0.232032   -9999.000000   -9999.000000   -9999.000000       1.000000
57076     57076     henan          112.7900       34.7344          101       171     2012      10        29        303              0.139333      17.189362       0.000000       0.257888   -9999.000000       0.365400       0.088100   -9999.000000
57076     57076     henan          112.7900       34.7344          101       171     2012      10        30        304              0.138708      15.284058       0.000000       0.272819       0.086000   -9999.000000       0.070200   -9999.000000
57076     57076     henan          112.7900       34.7344          101       171     2012      10        31        305              0.137208      13.199890       0.497306       0.257373       0.107000   -9999.000000       0.097600       0.475000
57076     57076     henan          112.7900       34.7344          101       171     2012      11        01        306              0.135500      13.426208       0.490233       0.248311       0.116000       0.330600       0.092200   -9999.000000
57076     57076     henan          112.7900       34.7344          101       171     2012      11        02        307              0.135583      13.475250       6.587142       0.244102       0.132000   -9999.000000       0.093700       0.455000
57076     57076     henan          112.7900       34.7344          101       171     2012      11        03        308              0.166583      14.572968       1.484250       0.254481   -9999.000000   -9999.000000   -9999.000000   -9999.000000
57076     57076     henan          112.7900       34.7344          101       171     2012      11        04        309              0.160750       9.571442       0.284841       0.289856   -9999.000000       0.166900       0.026600       0.496000
57076     57076     henan          112.7900       34.7344          101       171     2012      11        05        310              0.156958       7.884216       0.244756       0.268915       0.128000       0.235200       0.111800       0.431000
57076     57076     henan          112.7900       34.7344          101       171     2012      11        06        311              0.154875       9.159271       0.000000       0.262008       0.132000       0.148800       0.066900   -9999.000000
57076     57076     henan          112.7900       34.7344          101       171     2012      11        07        312              0.152375      10.901062       0.000000       0.256502   -9999.000000   -9999.000000       0.096100       0.467000
57076     57076     henan          112.7900       34.7344          101       171     2012      11        08        313              0.151625      10.536896       0.000000       0.255322   -9999.000000       0.198600   -9999.000000   -9999.000000
57076     57076     henan          112.7900       34.7344          101       171     2012      11        09        314              0.147000      11.540588       0.000000       0.251749       0.171000       0.091500       0.117300       0.381000
57076     57076     henan          112.7900       34.7344          101       171     2012      11        10        315              0.142375       9.795776       0.197971       0.251124       0.110000       0.227100       0.041000       0.452000
57076     57076     henan          112.7900       34.7344          101       171     2012      11        11        316              0.136833       8.263275       0.000000       0.250661       0.111000       0.202900       0.109800       0.457000
57076     57076     henan          112.7900       34.7344          101       171     2012      11        12        317              0.134000       8.006775       0.000000       0.243522       0.118000   -9999.000000       0.060800       0.300000
57076     57076     henan          112.7900       34.7344          101       171     2012      11        13        318              0.000000       8.868195       0.000000       0.240129       0.132000       0.083000       0.083400   -9999.000000
57076     57076     henan          112.7900       34.7344          101       171     2012      11        14        319              0.129875       9.904785       0.000000       0.236307   -9999.000000       0.151600   -9999.000000       0.242000
57076     57076     henan          112.7900       34.7344          101       171     2012      11        15        320              0.127625       8.722992       0.436863       0.233096       0.121000       0.092200       0.080000       0.436000
57076     57076     henan          112.7900       34.7344          101       171     2012      11        16        321              0.124458       7.978424       0.000000       0.235928       0.132000       0.178700       0.070300       0.785000
57076     57076     henan          112.7900       34.7344          101       171     2012      11        17        322              0.000000       8.358124       0.920164       0.236042       0.122000   -9999.000000       0.104500       0.254000
57076     57076     henan          112.7900       34.7344          101       171     2012      11        18        323              0.122000       9.241943       0.045272       0.232579       0.120000   -9999.000000       0.082700   -9999.000000
57076     57076     henan          112.7900       34.7344          101       171     2012      11        19        324              0.120458      10.626923       0.219911       0.230593       0.139000       0.069400   -9999.000000       0.299000
57076     57076     henan          112.7900       34.7344          101       171     2012      11        20        325              0.119042       9.232208       0.000000       0.227793   -9999.000000       0.239200   -9999.000000   -9999.000000
57076     57076     henan          112.7900       34.7344          101       171     2012      11        21        326              0.117833       8.395599       0.000000       0.227780       0.108000       0.244300       0.020600       0.489000
57076     57076     henan          112.7900       34.7344          101       171     2012      11        22        327              0.115458       9.026703       0.000000       0.226479       0.122000   -9999.000000       0.086300       0.229000
57076     57076     henan          112.7900       34.7344          101       171     2012      11        23        328              0.111750       8.709900       0.000000       0.226054       0.119000   -9999.000000       0.055100   -9999.000000
57076     57076     henan          112.7900       34.7344          101       171     2012      11        24        329              0.110875       6.163696       0.956178       0.224231   -9999.000000   -9999.000000       0.080000       0.335000
57076     57076     henan          112.7900       34.7344          101       171     2012      11        25        330              0.111292       7.430756       0.653929       0.226467   -9999.000000   -9999.000000   -9999.000000   -9999.000000
57076     57076     henan          112.7900       34.7344          101       171     2012      11        26        331              0.109739       6.288757       0.476825       0.242480       0.093000       0.278000   -9999.000000       0.347000
57076     57076     henan          112.7900       34.7344          101       171     2012      11        27        332              0.111750       6.109680       0.122386       0.238382       0.125000   -9999.000000       0.052200   -9999.000000
57076     57076     henan          112.7900       34.7344          101       171     2012      11        28        333              0.110542       8.041718       0.017277       0.234801       0.127000   -9999.000000       0.116800   -9999.000000
57076     57076     henan          112.7900       34.7344          101       171     2012      11        29        334              0.108583       6.192352       0.282165       0.229843   -9999.000000       0.115800       0.076700       0.312000
57076     57076     henan          112.7900       34.7344          101       171     2012      11        30        335              0.108583       4.464874       0.092719       0.227075   -9999.000000   -9999.000000       0.097800   -9999.000000
57076     57076     henan          112.7900       34.7344          101       171     2012      12        01        336              0.106917       4.127136       0.188455       0.225705   -9999.000000   -9999.000000   -9999.000000       0.595000
57076     57076     henan          112.7900       34.7344          101       171     2012      12        02        337              0.107333       1.626160       1.213375       0.221891   -9999.000000       0.110000       0.058900   -9999.000000
57076     57076     henan          112.7900       34.7344          101       171     2012      12        03        338              0.107667       2.264893       0.294071       0.228344       0.134000       0.146800       0.147400       0.575000
57076     57076     henan          112.7900       34.7344          101       171     2012      12        04        339              0.107250       4.217773       0.217656       0.223514       0.136000       0.169400       0.086400       0.421000
57076     57076     henan          112.7900       34.7344          101       171     2012      12        05        340              0.107375       5.041229       0.312070       0.230335   -9999.000000   -9999.000000       0.119900   -9999.000000
57076     57076     henan          112.7900       34.7344          101       171     2012      12        06        341              0.106917       4.183044       0.360231       0.222444   -9999.000000       0.187300   -9999.000000       0.385000
57076     57076     henan          112.7900       34.7344          101       171     2012      12        07        342              0.106875       4.758911       0.126378       0.228099       0.103000       0.082200   -9999.000000   -9999.000000
57076     57076     henan          112.7900       34.7344          101       171     2012      12        08        343              0.104750       5.140045       0.237542       0.225459       0.125000       0.073700       0.038600       0.376000
57076     57076     henan          112.7900       34.7344          101       171     2012      12        09        344              0.102958       3.486969       0.517184       0.214463   -9999.000000       0.103000       0.142400       0.371000
57076     57076     henan          112.7900       34.7344          101       171     2012      12        10        345              0.101667       2.073090       0.842628       0.207365   -9999.000000   -9999.000000       0.068700       0.410000
57076     57076     henan          112.7900       34.7344          101       171     2012      12        11        346              0.101458       1.858734       0.000000       0.208085   -9999.000000       0.119500       0.079400       0.159000
57076     57076     henan          112.7900       34.7344          101       171     2012      12        12        347              0.100875       0.532990       0.000000       0.205031   -9999.000000       0.178100   -9999.000000   -9999.000000
57076     57076     henan          112.7900       34.7344          101       171     2012      12        13        348              0.102333       0.706665       1.242370       0.207177   -9999.000000   -9999.000000       0.078000       0.336000
57076     57076     henan          112.7900       34.7344          101       171     2012      12        14        349              0.103500       0.307281       0.295903       0.215161   -9999.000000   -9999.000000       0.070400       0.701000
57076     57076     henan          112.7900       34.7344          101       171     2012      12        15        350              0.000000       2.316254       0.197298       0.229482   -9999.000000       0.025700       0.119900       0.610000
57076     57076     henan          112.7900       34.7344          101       171     2012      12        16        351              0.105750       1.387787       0.000000       0.228146   -9999.000000   -9999.000000       0.103400       0.491000
57076     57076     henan          112.7900       34.7344          101       171     2012      12        17        352              0.106000       2.425446       0.380934       0.235936   -9999.000000       0.222300       0.102000   -9999.000000
57076     57076     henan          112.7900       34.7344          101       171     2012      12        18        353              0.104750       1.767944       0.000000       0.230357   -9999.000000   -9999.000000   -9999.000000       0.416000
57076     57076     henan          112.7900       34.7344          101       171     2012      12        19        354              0.104125       1.038605       0.000000       0.217914   -9999.000000       0.110000       0.030400   -9999.000000
57076     57076     henan          112.7900       34.7344          101       171     2012      12        20        355              0.000000       0.610596       0.000000       0.215176   -9999.000000       0.209300       0.121500       0.488000
57076     57076     henan          112.7900       34.7344          101       171     2012      12        21        356              0.104625      -0.102753       0.046630       0.208016   -9999.000000   -9999.000000       0.072200       0.215000
57076     57076     henan          112.7900       34.7344          101       171     2012      12        22        357              0.103542       1.428223       0.000000       0.216025   -9999.000000       0.067900       0.102100   -9999.000000
57076     57076     henan          112.7900       34.7344          101       171     2012      12        23        358              0.095667       0.831360       0.000000       0.210236   -9999.000000   -9999.000000   -9999.000000       0.207000
57076     57076     henan          112.7900       34.7344          101       171     2012      12        24        359              0.091238      -1.694763       0.000000       0.189262   -9999.000000       0.124900       0.133000   -9999.000000
57076     57076     henan          112.7900       34.7344          101       171     2012      12        25        360              0.089958      -0.924835       0.000000       0.192457   -9999.000000       0.075900       0.044900       0.246000
57076     57076     henan          112.7900       34.7344          101       171     2012      12        26        361              0.000000      -1.820526       0.000000       0.187812   -9999.000000   -9999.000000       0.138900   -9999.000000
57076     57076     henan          112.7900       34.7344          101       171     2012      12        27        362              0.096750      -1.596405       0.000000       0.187020   -9999.000000       0.044600       0.092800   -9999.000000
57076     57076     henan          112.7900       34.7344          101       171     2012      12        28        363              0.103000      -0.355164       0.000000       0.197751   -9999.000000   -9999.000000       0.121800       0.403000
57076     57076     henan          112.7900       34.7344          101       171     2012      12        29        364              0.000000       0.347107       0.000000       0.205537   -9999.000000       0.258800   -9999.000000   -9999.000000
57076     57076     henan          112.7900       34.7344          101       171     2012      12        30        365              0.000000      -1.134094       0.000000       0.193475   -9999.000000       0.120400       0.095300       0.277000
57076     57076     henan          112.7900       34.7344          101       171     2012      12        31        366              0.095067      -0.337769       0.000000       0.195164   -9999.000000   -9999.000000       0.090200   -9999.000000
