# Supplementary material for: Research on Fusing Multisatellite Soil Moisture Data Based on Bayesian Model Averaging
Source: Hindawi journal article supplement (doi:10.1155/2018/9310838), 2018-06-25
Supplement: f1 [file 9310838.f1.zip › 2012_sm00-10cm_daily_ZDB_ZHY_57093_366days_allin.txt]

57093     57093     henan          114.8472       34.8467          101       179     2012      01        01        001              0.000000   -9999.000000       0.000000   -9999.000000   -9999.000000   -9999.000000       0.087700   -9999.000000
57093     57093     henan          114.8472       34.8467          101       179     2012      01        02        002              0.131917      -0.069000       0.195987       0.181407   -9999.000000   -9999.000000       0.105400   -9999.000000
57093     57093     henan          114.8472       34.8467          101       179     2012      01        03        003              0.000000       1.106018       0.000000       0.199510   -9999.000000   -9999.000000   -9999.000000       0.252000
57093     57093     henan          114.8472       34.8467          101       179     2012      01        04        004              0.114167      -0.035706       0.000000       0.185128   -9999.000000   -9999.000000   -9999.000000   -9999.000000
57093     57093     henan          114.8472       34.8467          101       179     2012      01        05        005              0.098583      -0.203430       0.000000       0.178397   -9999.000000   -9999.000000       0.047100       0.099000
57093     57093     henan          114.8472       34.8467          101       179     2012      01        06        006              0.094625       0.355865       0.000000       0.184047   -9999.000000   -9999.000000       0.089700       0.162000
57093     57093     henan          114.8472       34.8467          101       179     2012      01        07        007              0.090833       0.560699       0.000000       0.188338   -9999.000000   -9999.000000       0.089900       0.301000
57093     57093     henan          114.8472       34.8467          101       179     2012      01        08        008              0.000000       0.625549       0.000000       0.190196   -9999.000000       0.071600       0.095200       0.075000
57093     57093     henan          114.8472       34.8467          101       179     2012      01        09        009              0.098583       1.265564       0.000000       0.195702   -9999.000000   -9999.000000   -9999.000000   -9999.000000
57093     57093     henan          114.8472       34.8467          101       179     2012      01        10        010              0.104917       1.369720       0.000000       0.198418   -9999.000000   -9999.000000       0.059100       0.137000
57093     57093     henan          114.8472       34.8467          101       179     2012      01        11        011              0.097917       0.109650       0.000000       0.189413   -9999.000000       0.053600       0.061300       0.127000
57093     57093     henan          114.8472       34.8467          101       179     2012      01        12        012              0.091500       0.199066       0.000000       0.183539   -9999.000000   -9999.000000       0.072000       0.408000
57093     57093     henan          114.8472       34.8467          101       179     2012      01        13        013              0.095750       0.771851       0.000000       0.192115   -9999.000000       0.065100       0.078200       0.199000
57093     57093     henan          114.8472       34.8467          101       179     2012      01        14        014              0.110875       1.401367       0.000000       0.202457   -9999.000000   -9999.000000       0.079700   -9999.000000
57093     57093     henan          114.8472       34.8467          101       179     2012      01        15        015              0.129333       1.901917       0.000000       0.214895   -9999.000000       0.158400   -9999.000000       0.258000
57093     57093     henan          114.8472       34.8467          101       179     2012      01        16        016              0.132750       2.802124       1.516553       0.213976   -9999.000000       0.041000       0.051300   -9999.000000
57093     57093     henan          114.8472       34.8467          101       179     2012      01        17        017              0.000000       1.928986       0.145742       0.231036   -9999.000000   -9999.000000       0.091400       0.494000
57093     57093     henan          114.8472       34.8467          101       179     2012      01        18        018              0.132750       2.661224       0.931277       0.242138   -9999.000000       0.242600       0.078500       0.459000
57093     57093     henan          114.8472       34.8467          101       179     2012      01        19        019              0.131917       2.154358       0.417908       0.244021   -9999.000000   -9999.000000       0.087200   -9999.000000
57093     57093     henan          114.8472       34.8467          101       179     2012      01        20        020              0.130125       2.199921       0.000000       0.243192   -9999.000000       0.157500   -9999.000000       0.383000
57093     57093     henan          114.8472       34.8467          101       179     2012      01        21        021              0.120667       1.362366       0.000000       0.219581   -9999.000000       0.126600   -9999.000000   -9999.000000
57093     57093     henan          114.8472       34.8467          101       179     2012      01        22        022              0.096708      -1.305573       0.000000       0.169997   -9999.000000   -9999.000000       0.027100       0.054000
57093     57093     henan          114.8472       34.8467          101       179     2012      01        23        023              0.081667      -1.447662       0.000000       0.167286   -9999.000000       0.044700       0.079400   -9999.000000
57093     57093     henan          114.8472       34.8467          101       179     2012      01        24        024              0.076292      -0.612152       0.000000       0.175381   -9999.000000       0.035000   -9999.000000   -9999.000000
57093     57093     henan          114.8472       34.8467          101       179     2012      01        25        025              0.074208      -0.354950       0.000000       0.177652       0.093000       0.292200       0.081300       0.049000
57093     57093     henan          114.8472       34.8467          101       179     2012      01        26        026              0.079333       0.710052       0.000000       0.189396   -9999.000000       0.057600   -9999.000000   -9999.000000
57093     57093     henan          114.8472       34.8467          101       179     2012      01        27        027              0.085917       1.818573       0.000000       0.202304   -9999.000000   -9999.000000       0.065800       0.249000
57093     57093     henan          114.8472       34.8467          101       179     2012      01        28        028              0.092708       2.204132       0.063081       0.210031   -9999.000000   -9999.000000       0.074000   -9999.000000
57093     57093     henan          114.8472       34.8467          101       179     2012      01        29        029              0.100083       2.462708       0.299879       0.214994   -9999.000000       0.084400       0.083600       0.108000
57093     57093     henan          114.8472       34.8467          101       179     2012      01        30        030              0.106750       1.357422       0.000000       0.204350   -9999.000000   -9999.000000       0.081400       0.135000
57093     57093     henan          114.8472       34.8467          101       179     2012      01        31        031              0.121375       1.754761       0.000000       0.207027   -9999.000000       0.055400       0.085600   -9999.000000
57093     57093     henan          114.8472       34.8467          101       179     2012      02        01        032              0.119042       3.535370       0.000000       0.216886   -9999.000000   -9999.000000   -9999.000000       0.103000
57093     57093     henan          114.8472       34.8467          101       179     2012      02        02        033              0.107208       0.232300       0.000000       0.187214   -9999.000000       0.145600       0.034100   -9999.000000
57093     57093     henan          114.8472       34.8467          101       179     2012      02        03        034              0.106083       0.444214       0.000000       0.185148       0.094000       0.137400       0.076400       0.276000
57093     57093     henan          114.8472       34.8467          101       179     2012      02        04        035              0.111583       1.917572       0.000000       0.199747   -9999.000000       0.207500       0.074900       0.223000
57093     57093     henan          114.8472       34.8467          101       179     2012      02        05        036              0.116000       2.097198       0.000000       0.206345   -9999.000000       0.032400       0.082800       0.382000
57093     57093     henan          114.8472       34.8467          101       179     2012      02        06        037              0.115125       3.299103       0.000000       0.222819   -9999.000000   -9999.000000   -9999.000000       0.151000
57093     57093     henan          114.8472       34.8467          101       179     2012      02        07        038              0.107125       2.384949       0.000000       0.208368       0.066000   -9999.000000       0.080000   -9999.000000
57093     57093     henan          114.8472       34.8467          101       179     2012      02        08        039              0.101958       0.451996       0.000000       0.182565   -9999.000000       0.120000       0.043100       0.203000
57093     57093     henan          114.8472       34.8467          101       179     2012      02        09        040              0.104333       0.453278       0.000000       0.182018       0.088000       0.098900       0.082500       0.226000
57093     57093     henan          114.8472       34.8467          101       179     2012      02        10        041              0.104292       1.573456       0.000000       0.192305       0.095000       0.042100       0.080200       0.385000
57093     57093     henan          114.8472       34.8467          101       179     2012      02        11        042              0.105542       2.236176       0.000000       0.192384   -9999.000000   -9999.000000       0.088800       0.215000
57093     57093     henan          114.8472       34.8467          101       179     2012      02        12        043              0.110458       3.708130       0.000000       0.209115   -9999.000000       0.100300   -9999.000000   -9999.000000
57093     57093     henan          114.8472       34.8467          101       179     2012      02        13        044              0.109875       2.384735       0.000000       0.213012   -9999.000000       0.064500   -9999.000000       0.163000
57093     57093     henan          114.8472       34.8467          101       179     2012      02        14        045              0.109083       3.616333       0.000000       0.217590       0.083000   -9999.000000       0.083800   -9999.000000
57093     57093     henan          114.8472       34.8467          101       179     2012      02        15        046              0.107667       4.893555       0.000000       0.224509       0.082000   -9999.000000       0.091100       0.322000
57093     57093     henan          114.8472       34.8467          101       179     2012      02        16        047              0.105458       3.587128       0.000000       0.217995   -9999.000000       0.098900       0.090300       0.126000
57093     57093     henan          114.8472       34.8467          101       179     2012      02        17        048              0.103375       2.638428       0.000000       0.199908   -9999.000000   -9999.000000       0.086500   -9999.000000
57093     57093     henan          114.8472       34.8467          101       179     2012      02        18        049              0.103083       2.360535       3.132715       0.193212       0.087000       0.019600   -9999.000000       0.105000
57093     57093     henan          114.8472       34.8467          101       179     2012      02        19        050              0.104500       3.300171       0.109434       0.199526       0.082000   -9999.000000       0.042700   -9999.000000
57093     57093     henan          114.8472       34.8467          101       179     2012      02        20        051              0.105000       5.338409       0.000000       0.214973       0.080000       0.215900       0.086100       0.363000
57093     57093     henan          114.8472       34.8467          101       179     2012      02        21        052              0.103750       7.406799       0.019006       0.218412   -9999.000000       0.078200   -9999.000000   -9999.000000
57093     57093     henan          114.8472       34.8467          101       179     2012      02        22        053              0.103375       7.625122       0.000000       0.218604       0.097000   -9999.000000       0.082200   -9999.000000
57093     57093     henan          114.8472       34.8467          101       179     2012      02        23        054              0.102083       8.977142       0.000000       0.217975       0.074000       0.343000   -9999.000000       0.395000
57093     57093     henan          114.8472       34.8467          101       179     2012      02        24        055              0.101000       4.827393       0.000000       0.213303       0.091000   -9999.000000       0.082000   -9999.000000
57093     57093     henan          114.8472       34.8467          101       179     2012      02        25        056              0.100875       4.432068       0.000000       0.210942   -9999.000000       0.144700       0.048100       0.320000
57093     57093     henan          114.8472       34.8467          101       179     2012      02        26        057              0.099750       3.605804       0.126525       0.206465   -9999.000000   -9999.000000       0.083500   -9999.000000
57093     57093     henan          114.8472       34.8467          101       179     2012      02        27        058              0.099125       4.408295       0.000000       0.201319   -9999.000000   -9999.000000   -9999.000000       0.213000
57093     57093     henan          114.8472       34.8467          101       179     2012      02        28        059              0.099000       4.993805       0.049717       0.205397       0.065000       0.047800       0.076100       0.367000
57093     57093     henan          114.8472       34.8467          101       179     2012      02        29        060              0.000000   -9999.000000       0.764682   -9999.000000       0.099000   -9999.000000   -9999.000000   -9999.000000
57093     57093     henan          114.8472       34.8467          101       179     2012      03        01        061              0.101375       7.038025       7.392262       0.209228   -9999.000000   -9999.000000       0.076800       0.663000
57093     57093     henan          114.8472       34.8467          101       179     2012      03        02        062              0.105750       4.987640       0.558630       0.266855   -9999.000000   -9999.000000       0.092400   -9999.000000
57093     57093     henan          114.8472       34.8467          101       179     2012      03        03        063              0.103000       4.440796       0.059142       0.257938   -9999.000000   -9999.000000       0.084900       0.520000
57093     57093     henan          114.8472       34.8467          101       179     2012      03        04        064              0.103000       3.095764       0.171705       0.249316   -9999.000000   -9999.000000       0.085500       0.405000
57093     57093     henan          114.8472       34.8467          101       179     2012      03        05        065              0.155417       4.858673       0.000000       0.242846       0.096000       0.188400   -9999.000000       0.459000
57093     57093     henan          114.8472       34.8467          101       179     2012      03        06        066              0.153792       6.655975       0.077435       0.242290       0.094000   -9999.000000   -9999.000000       0.262000
57093     57093     henan          114.8472       34.8467          101       179     2012      03        07        067              0.000000       6.336761       0.000000       0.238763       0.093000       0.090900       0.045800   -9999.000000
57093     57093     henan          114.8472       34.8467          101       179     2012      03        08        068              0.144750       9.006500       0.000000       0.233419   -9999.000000   -9999.000000       0.095600       0.208000
57093     57093     henan          114.8472       34.8467          101       179     2012      03        09        069              0.142000       5.486145       0.069973       0.229592   -9999.000000       0.110800       0.082600       0.333000
57093     57093     henan          114.8472       34.8467          101       179     2012      03        10        070              0.139957       6.886963       0.000000       0.229703       0.098000   -9999.000000       0.087300       0.432000
57093     57093     henan          114.8472       34.8467          101       179     2012      03        11        071              0.134583      10.290741       0.000000       0.223430       0.092000       0.176800   -9999.000000       0.185000
57093     57093     henan          114.8472       34.8467          101       179     2012      03        12        072              0.131833       5.603821       0.000000       0.213984       0.100000   -9999.000000       0.097800   -9999.000000
57093     57093     henan          114.8472       34.8467          101       179     2012      03        13        073              0.182875       6.994598       0.000000       0.217181   -9999.000000   -9999.000000       0.071800       0.129000
57093     57093     henan          114.8472       34.8467          101       179     2012      03        14        074              0.168375      11.497040       0.000000       0.213410   -9999.000000       0.042000       0.098000   -9999.000000
57093     57093     henan          114.8472       34.8467          101       179     2012      03        15        075              0.166875      11.076294       8.892365       0.210669   -9999.000000       0.111600       0.116800       0.642000
57093     57093     henan          114.8472       34.8467          101       179     2012      03        16        076              0.164083       7.096710       0.000000       0.264466       0.102000   -9999.000000       0.106300       0.273000
57093     57093     henan          114.8472       34.8467          101       179     2012      03        17        077              0.157292      11.432617       0.000000       0.262937       0.093000       0.272200   -9999.000000   -9999.000000
57093     57093     henan          114.8472       34.8467          101       179     2012      03        18        078              0.149875      13.399170       0.000000       0.250722       0.106000   -9999.000000       0.071000       0.271000
57093     57093     henan          114.8472       34.8467          101       179     2012      03        19        079              0.148000       7.672699       0.139286       0.245326   -9999.000000   -9999.000000       0.135400   -9999.000000
57093     57093     henan          114.8472       34.8467          101       179     2012      03        20        080              0.145042       3.897095       0.000000       0.245131       0.087000   -9999.000000       0.115800       0.251000
57093     57093     henan          114.8472       34.8467          101       179     2012      03        21        081              0.153125       6.875031      17.608110       0.240308   -9999.000000   -9999.000000       0.169200   -9999.000000
57093     57093     henan          114.8472       34.8467          101       179     2012      03        22        082              0.164375       4.739288       1.651189       0.299865   -9999.000000       0.036700   -9999.000000   -9999.000000
57093     57093     henan          114.8472       34.8467          101       179     2012      03        23        083              0.157042       4.913940       0.049861       0.312410       0.136000   -9999.000000   -9999.000000       0.175000
57093     57093     henan          114.8472       34.8467          101       179     2012      03        24        084              0.151250      10.054962       0.000000       0.288606   -9999.000000   -9999.000000   -9999.000000   -9999.000000
57093     57093     henan          114.8472       34.8467          101       179     2012      03        25        085              0.000000      13.376465       0.000000       0.275159   -9999.000000       0.284300       0.138300       0.242000
57093     57093     henan          114.8472       34.8467          101       179     2012      03        26        086              0.142500      14.159210       0.000000       0.265886       0.125500   -9999.000000       0.124000   -9999.000000
57093     57093     henan          114.8472       34.8467          101       179     2012      03        27        087              0.137875      16.264771       0.000000       0.258104       0.116000       0.194800       0.128600       0.389000
57093     57093     henan          114.8472       34.8467          101       179     2012      03        28        088              0.133250      18.491180       0.000000       0.248885       0.110000   -9999.000000   -9999.000000       0.240000
57093     57093     henan          114.8472       34.8467          101       179     2012      03        29        089              0.130292      17.920654       0.000000       0.242172   -9999.000000   -9999.000000       0.130400   -9999.000000
57093     57093     henan          114.8472       34.8467          101       179     2012      03        30        090              0.124500      17.299042       0.000000       0.240382       0.128000       0.070400       0.103800       0.035000
57093     57093     henan          114.8472       34.8467          101       179     2012      03        31        091              0.119500      14.014465       0.000000       0.232851       0.112000   -9999.000000       0.132900   -9999.000000
57093     57093     henan          114.8472       34.8467          101       179     2012      04        01        092              0.113958      16.916229       0.382492       0.222489       0.157500   -9999.000000       0.110700       0.253000
57093     57093     henan          114.8472       34.8467          101       179     2012      04        02        093              0.107417      17.789856       0.894278       0.217020       0.163000       0.120100       0.155500       0.083000
57093     57093     henan          114.8472       34.8467          101       179     2012      04        03        094              0.106167       9.518890       0.000000       0.225881   -9999.000000   -9999.000000   -9999.000000       0.257000
57093     57093     henan          114.8472       34.8467          101       179     2012      04        04        095              0.101750      14.577454       0.332881       0.222001       0.154000       0.100500       0.098800       0.111000
57093     57093     henan          114.8472       34.8467          101       179     2012      04        05        096              0.095542      17.677032       0.000000       0.215547       0.125000   -9999.000000       0.153400   -9999.000000
57093     57093     henan          114.8472       34.8467          101       179     2012      04        06        097              0.088958      18.015320       0.000000       0.204643       0.139500   -9999.000000       0.130800       0.020000
57093     57093     henan          114.8472       34.8467          101       179     2012      04        07        098              0.082208      19.098297       0.264031       0.195798       0.124000   -9999.000000       0.137600       0.035000
57093     57093     henan          114.8472       34.8467          101       179     2012      04        08        099              0.075542      20.708710       0.267311       0.189366       0.137000   -9999.000000   -9999.000000       0.109000
57093     57093     henan          114.8472       34.8467          101       179     2012      04        09        100              0.070625      22.639862       1.406184       0.183877       0.147000       0.050000   -9999.000000   -9999.000000
57093     57093     henan          114.8472       34.8467          101       179     2012      04        10        101              0.067375      20.086639       0.000000       0.181136       0.146000   -9999.000000       0.106000   -9999.000000
57093     57093     henan          114.8472       34.8467          101       179     2012      04        11        102              0.093208      20.752045       0.472492       0.179576       0.177500   -9999.000000       0.196700       0.169000
57093     57093     henan          114.8472       34.8467          101       179     2012      04        12        103              0.092083      18.876068       1.877949       0.179656       0.195000   -9999.000000       0.167600   -9999.000000
57093     57093     henan          114.8472       34.8467          101       179     2012      04        13        104              0.092333      13.982147       0.000000       0.211330       0.169000   -9999.000000       0.166500       0.106000
57093     57093     henan          114.8472       34.8467          101       179     2012      04        14        105              0.090167      20.428741       0.369002       0.195628       0.178000       0.169600   -9999.000000   -9999.000000
57093     57093     henan          114.8472       34.8467          101       179     2012      04        15        106              0.088333      18.953186       0.000000       0.186487       0.186000   -9999.000000       0.156500   -9999.000000
57093     57093     henan          114.8472       34.8467          101       179     2012      04        16        107              0.086750      18.981140       0.185377       0.181278       0.177500   -9999.000000       0.114900       0.056000
57093     57093     henan          114.8472       34.8467          101       179     2012      04        17        108              0.086500      18.678253       0.090845       0.179626       0.171500       0.215700       0.114700   -9999.000000
57093     57093     henan          114.8472       34.8467          101       179     2012      04        18        109              0.084708      21.232910       0.000000       0.173110       0.172000   -9999.000000   -9999.000000       0.042000
57093     57093     henan          114.8472       34.8467          101       179     2012      04        19        110              0.084125      20.309601       0.441071       0.171085   -9999.000000       0.147200       0.127500   -9999.000000
57093     57093     henan          114.8472       34.8467          101       179     2012      04        20        111              0.082250      22.308075       0.000000       0.167995       0.165000       0.055000   -9999.000000   -9999.000000
57093     57093     henan          114.8472       34.8467          101       179     2012      04        21        112              0.081833      17.816010       0.882812       0.170224       0.165000   -9999.000000       0.081600       0.026000
57093     57093     henan          114.8472       34.8467          101       179     2012      04        22        113              0.082000      20.286591       0.000000       0.173939       0.169000       0.172200       0.135100   -9999.000000
57093     57093     henan          114.8472       34.8467          101       179     2012      04        23        114              0.096167      23.808136      42.668072       0.170498       0.148000   -9999.000000       0.155400       0.146000
57093     57093     henan          114.8472       34.8467          101       179     2012      04        24        115              0.184333      26.403046       0.273462       0.255650   -9999.000000   -9999.000000       0.248000   -9999.000000
57093     57093     henan          114.8472       34.8467          101       179     2012      04        25        116              0.000000      18.050964       0.000000       0.325200   -9999.000000   -9999.000000   -9999.000000       0.651000
57093     57093     henan          114.8472       34.8467          101       179     2012      04        26        117              0.155042      18.695160       0.000000       0.295076       0.165500   -9999.000000   -9999.000000       0.189000
57093     57093     henan          114.8472       34.8467          101       179     2012      04        27        118              0.145042      21.243225       0.000000       0.279005       0.168000       0.113900   -9999.000000   -9999.000000
57093     57093     henan          114.8472       34.8467          101       179     2012      04        28        119              0.135478      24.218201       0.000000       0.266966       0.157000       0.106100       0.188700       0.015000
57093     57093     henan          114.8472       34.8467          101       179     2012      04        29        120              0.127174      20.710419       0.000000       0.255523       0.161000   -9999.000000       0.157500   -9999.000000
57093     57093     henan          114.8472       34.8467          101       179     2012      04        30        121              0.121167      21.169373       0.000000       0.245738       0.181000       0.207000       0.184000       0.078000
57093     57093     henan          114.8472       34.8467          101       179     2012      05        01        122              0.115458      21.007385       0.000000       0.245423       0.226000   -9999.000000   -9999.000000       0.113000
57093     57093     henan          114.8472       34.8467          101       179     2012      05        02        123              0.108833      22.823578       0.000000       0.237909       0.189000       0.156000       0.165500       0.073000
57093     57093     henan          114.8472       34.8467          101       179     2012      05        03        124              0.102375      24.844788       0.000000       0.225588       0.169000       0.195700       0.175600       0.075000
57093     57093     henan          114.8472       34.8467          101       179     2012      05        04        125              0.096458      26.177155       0.000000       0.214148       0.168000   -9999.000000       0.193000   -9999.000000
57093     57093     henan          114.8472       34.8467          101       179     2012      05        05        126              0.090700      26.746033       0.175890       0.202175       0.209000   -9999.000000       0.181600       0.055000
57093     57093     henan          114.8472       34.8467          101       179     2012      05        06        127              0.088292      26.789703       0.000000       0.192156       0.195000   -9999.000000       0.180200       0.095000
57093     57093     henan          114.8472       34.8467          101       179     2012      05        07        128              0.088750      28.360199       1.098389       0.183700   -9999.000000       0.169800   -9999.000000       0.094000
57093     57093     henan          114.8472       34.8467          101       179     2012      05        08        129              0.091375      24.237366       0.000000       0.196262       0.203000       0.214600       0.090300       0.144000
57093     57093     henan          114.8472       34.8467          101       179     2012      05        09        130              0.090167      27.057465       0.951313       0.190164       0.190000   -9999.000000       0.148100   -9999.000000
57093     57093     henan          114.8472       34.8467          101       179     2012      05        10        131              0.088292      27.812927       0.000000       0.181886   -9999.000000   -9999.000000       0.130500       0.110000
57093     57093     henan          114.8472       34.8467          101       179     2012      05        11        132              0.087375      26.853851       1.537276       0.175959       0.164000   -9999.000000       0.140400   -9999.000000
57093     57093     henan          114.8472       34.8467          101       179     2012      05        12        133              0.141458      26.907227       6.848980       0.172189       0.185000   -9999.000000   -9999.000000       0.230000
57093     57093     henan          114.8472       34.8467          101       179     2012      05        13        134              0.140833      21.137817       0.104744       0.259155       0.166500       0.239600       0.145800       0.121000
57093     57093     henan          114.8472       34.8467          101       179     2012      05        14        135              0.130667      23.880005       0.000000       0.229634       0.149000   -9999.000000       0.118100   -9999.000000
57093     57093     henan          114.8472       34.8467          101       179     2012      05        15        136              0.121750      25.002502       0.200774       0.208074   -9999.000000       0.174300       0.191000       0.074000
57093     57093     henan          114.8472       34.8467          101       179     2012      05        16        137              0.114333      25.449097       0.170252       0.190525       0.175000       0.133200       0.164400   -9999.000000
57093     57093     henan          114.8472       34.8467          101       179     2012      05        17        138              0.108042      25.704376       0.000000       0.177027       0.138500   -9999.000000       0.177600       0.073000
57093     57093     henan          114.8472       34.8467          101       179     2012      05        18        139              0.102417      28.362549       0.000000       0.165819       0.155000       0.177300   -9999.000000   -9999.000000
57093     57093     henan          114.8472       34.8467          101       179     2012      05        19        140              0.098292      27.947815       0.000000       0.161468       0.137000   -9999.000000       0.150000   -9999.000000
57093     57093     henan          114.8472       34.8467          101       179     2012      05        20        141              0.093417      29.569489       0.000000       0.155893       0.150000   -9999.000000       0.169500       0.051000
57093     57093     henan          114.8472       34.8467          101       179     2012      05        21        142              0.090042      27.977753       0.000000       0.153516       0.115000       0.140500       0.138300   -9999.000000
57093     57093     henan          114.8472       34.8467          101       179     2012      05        22        143              0.087083      26.945770       0.295221       0.152450       0.130000   -9999.000000       0.139900       0.203000
57093     57093     henan          114.8472       34.8467          101       179     2012      05        23        144              0.086417      23.569305       0.000000       0.154282   -9999.000000       0.070100       0.128500   -9999.000000
57093     57093     henan          114.8472       34.8467          101       179     2012      05        24        145              0.084792      26.371521       0.336415       0.153265       0.124000   -9999.000000   -9999.000000       0.093000
57093     57093     henan          114.8472       34.8467          101       179     2012      05        25        146              0.000000      26.221619       0.000000       0.152381       0.110000       0.168500       0.072900       0.241000
57093     57093     henan          114.8472       34.8467          101       179     2012      05        26        147              0.082958      27.405792       0.111649       0.149391       0.127000       0.279400       0.138800   -9999.000000
57093     57093     henan          114.8472       34.8467          101       179     2012      05        27        148              0.081792      29.448151       0.000000       0.145754       0.127000   -9999.000000       0.121700       0.166000
57093     57093     henan          114.8472       34.8467          101       179     2012      05        28        149              0.080500      30.081726       0.343297       0.144173       0.105500       0.131100       0.129400   -9999.000000
57093     57093     henan          114.8472       34.8467          101       179     2012      05        29        150              0.078542      29.914764       0.471742       0.143699       0.128000   -9999.000000   -9999.000000       0.100000
57093     57093     henan          114.8472       34.8467          101       179     2012      05        30        151              0.078708      22.713440       0.000000       0.145646       0.103000       0.181200       0.137000   -9999.000000
57093     57093     henan          114.8472       34.8467          101       179     2012      05        31        152              0.077625      27.942535       0.369311       0.143616   -9999.000000   -9999.000000   -9999.000000   -9999.000000
57093     57093     henan          114.8472       34.8467          101       179     2012      06        01        153              0.076458      27.832794       0.000000       0.145378       0.089000       0.227700       0.139600       0.154000
57093     57093     henan          114.8472       34.8467          101       179     2012      06        02        154              0.076333      26.995544       0.000000       0.144456       0.067000       0.037200       0.123900   -9999.000000
57093     57093     henan          114.8472       34.8467          101       179     2012      06        03        155              0.075043      29.732880       0.000000       0.141182       0.085500       0.106500       0.136700       0.172000
57093     57093     henan          114.8472       34.8467          101       179     2012      06        04        156              0.074917      28.212402       0.000000       0.140243       0.083000   -9999.000000   -9999.000000       0.112000
57093     57093     henan          114.8472       34.8467          101       179     2012      06        05        157              0.074042      30.924774       0.726541       0.139027       0.084000       0.142000       0.076500       0.224000
57093     57093     henan          114.8472       34.8467          101       179     2012      06        06        158              0.073000      31.208313       1.766730       0.144166       0.097000   -9999.000000       0.101200       0.151000
57093     57093     henan          114.8472       34.8467          101       179     2012      06        07        159              0.073583      25.632233       0.000000       0.147830       0.080500   -9999.000000       0.103800   -9999.000000
57093     57093     henan          114.8472       34.8467          101       179     2012      06        08        160              0.073042      30.921600       0.000000       0.141375       0.089500       0.167500       0.117200       0.150000
57093     57093     henan          114.8472       34.8467          101       179     2012      06        09        161              0.072667      31.855194       0.000000       0.138062       0.086000   -9999.000000   -9999.000000   -9999.000000
57093     57093     henan          114.8472       34.8467          101       179     2012      06        10        162              0.070750      33.756622       0.000000       0.136156       0.104000       0.119600   -9999.000000       0.196000
57093     57093     henan          114.8472       34.8467          101       179     2012      06        11        163              0.000000      29.317780       0.000000       0.137698       0.086000   -9999.000000       0.062400       0.209000
57093     57093     henan          114.8472       34.8467          101       179     2012      06        12        164              0.071000      31.539062       2.911684       0.135552       0.088000       0.160800       0.118300   -9999.000000
57093     57093     henan          114.8472       34.8467          101       179     2012      06        13        165              0.070167      33.290283       0.000000       0.135290       0.102000       0.125900       0.128000       0.394000
57093     57093     henan          114.8472       34.8467          101       179     2012      06        14        166              0.068500      35.893829       0.579709       0.134219       0.095000   -9999.000000       0.135100   -9999.000000
57093     57093     henan          114.8472       34.8467          101       179     2012      06        15        167              0.068292      30.591248       0.300265       0.135291       0.099000       0.207900   -9999.000000       0.346000
57093     57093     henan          114.8472       34.8467          101       179     2012      06        16        168              0.067917      32.156860       0.000000       0.135663   -9999.000000   -9999.000000       0.121100   -9999.000000
57093     57093     henan          114.8472       34.8467          101       179     2012      06        17        169              0.067292      32.986420       0.000000       0.134553       0.091000   -9999.000000       0.092400   -9999.000000
57093     57093     henan          114.8472       34.8467          101       179     2012      06        18        170              0.067333      31.630524       0.787899       0.134879       0.097500       0.324300       0.104100       0.315000
57093     57093     henan          114.8472       34.8467          101       179     2012      06        19        171              0.067417      32.929321       2.952866       0.134806       0.095500   -9999.000000       0.112400   -9999.000000
57093     57093     henan          114.8472       34.8467          101       179     2012      06        20        172              0.067167      33.832977       0.000000       0.135062       0.099000       0.257700       0.118300       0.352000
57093     57093     henan          114.8472       34.8467          101       179     2012      06        21        173              0.067000      34.154694       0.000000       0.133965   -9999.000000   -9999.000000   -9999.000000   -9999.000000
57093     57093     henan          114.8472       34.8467          101       179     2012      06        22        174              0.066958      34.451172       0.378011       0.133675       0.096000   -9999.000000       0.072300       0.555000
57093     57093     henan          114.8472       34.8467          101       179     2012      06        23        175              0.066583      35.283875       0.000000       0.134981       0.090500       0.211500       0.109200       0.437000
57093     57093     henan          114.8472       34.8467          101       179     2012      06        24        176              0.066583      34.935730       1.866189       0.133995       0.105500   -9999.000000       0.105300   -9999.000000
57093     57093     henan          114.8472       34.8467          101       179     2012      06        25        177              0.065375      34.536316       0.271469       0.133419       0.103000       0.070700       0.101200       0.365000
57093     57093     henan          114.8472       34.8467          101       179     2012      06        26        178              0.066333      31.272430       3.326401       0.135665       0.105000       0.269200   -9999.000000   -9999.000000
57093     57093     henan          114.8472       34.8467          101       179     2012      06        27        179              0.065875      31.018372       0.497969       0.166201       0.116000   -9999.000000   -9999.000000       0.514000
57093     57093     henan          114.8472       34.8467          101       179     2012      06        28        180              0.065292      29.026886       1.358786       0.163703       0.139000       0.102300       0.088200       0.605000
57093     57093     henan          114.8472       34.8467          101       179     2012      06        29        181              0.067583      26.695099       0.840154       0.167284       0.134000   -9999.000000       0.112800       0.589000
57093     57093     henan          114.8472       34.8467          101       179     2012      06        30        182              0.070667      26.805206       0.000000       0.180923       0.107000       0.243200       0.100100   -9999.000000
57093     57093     henan          114.8472       34.8467          101       179     2012      07        01        183              0.071500      30.210571       0.000000       0.160549       0.133000       0.198500       0.104600   -9999.000000
57093     57093     henan          114.8472       34.8467          101       179     2012      07        02        184              0.070500      32.537079       0.000000       0.144510       0.128000   -9999.000000   -9999.000000       0.340000
57093     57093     henan          114.8472       34.8467          101       179     2012      07        03        185              0.070875      29.417358       0.736549       0.141631       0.130000       0.244700       0.106900       0.509000
57093     57093     henan          114.8472       34.8467          101       179     2012      07        04        186              0.135792      34.183411      33.343822       0.136917       0.193000   -9999.000000       0.123500       0.515000
57093     57093     henan          114.8472       34.8467          101       179     2012      07        05        187              0.179625      27.504578       3.770525       0.287137       0.167000       0.185900       0.128100       0.785000
57093     57093     henan          114.8472       34.8467          101       179     2012      07        06        188              0.162292      26.834717       0.289163       0.303074   -9999.000000       0.404000       0.127800   -9999.000000
57093     57093     henan          114.8472       34.8467          101       179     2012      07        07        189              0.206417      30.280121      68.587837       0.267102   -9999.000000   -9999.000000       0.158400       1.000000
57093     57093     henan          114.8472       34.8467          101       179     2012      07        08        190              0.193917      27.388184       4.392980       0.382901       0.172000       0.498700   -9999.000000   -9999.000000
57093     57093     henan          114.8472       34.8467          101       179     2012      07        09        191              0.194250      29.377228       9.662255       0.343807       0.190000       0.455600       0.115700       1.000000
57093     57093     henan          114.8472       34.8467          101       179     2012      07        10        192              0.182833      28.055939       1.200147       0.348125       0.168000   -9999.000000       0.157000       0.831000
57093     57093     henan          114.8472       34.8467          101       179     2012      07        11        193              0.171667      30.139587       1.616192       0.328639       0.176000       0.369100       0.137600   -9999.000000
57093     57093     henan          114.8472       34.8467          101       179     2012      07        12        194              0.178875      33.019104      15.924289       0.310259       0.175000   -9999.000000       0.133200       0.757000
57093     57093     henan          114.8472       34.8467          101       179     2012      07        13        195              0.190667      32.315552       0.000000       0.321543       0.192000       0.292200   -9999.000000   -9999.000000
57093     57093     henan          114.8472       34.8467          101       179     2012      07        14        196              0.182583      28.840729       0.309612       0.323207       0.206000       0.231300   -9999.000000       0.860000
57093     57093     henan          114.8472       34.8467          101       179     2012      07        15        197              0.173708      25.635101       0.000000       0.311411       0.174000   -9999.000000       0.089000   -9999.000000
57093     57093     henan          114.8472       34.8467          101       179     2012      07        16        198              0.165583      28.458252       0.000000       0.295657       0.176000       0.302100       0.106000   -9999.000000
57093     57093     henan          114.8472       34.8467          101       179     2012      07        17        199              0.160333      29.084473       0.510361       0.284872       0.155000   -9999.000000       0.086900       0.779000
57093     57093     henan          114.8472       34.8467          101       179     2012      07        18        200              0.155083      29.571350       0.000000       0.277175       0.184000   -9999.000000       0.090200   -9999.000000
57093     57093     henan          114.8472       34.8467          101       179     2012      07        19        201              0.149750      30.223053       0.000000       0.268841       0.183000       0.298500   -9999.000000       0.761000
57093     57093     henan          114.8472       34.8467          101       179     2012      07        20        202              0.145000      30.870728       0.211786       0.258400       0.160500   -9999.000000       0.079900   -9999.000000
57093     57093     henan          114.8472       34.8467          101       179     2012      07        21        203              0.141250      31.951202       0.389094       0.248026       0.247500       0.289800       0.082700       0.725000
57093     57093     henan          114.8472       34.8467          101       179     2012      07        22        204              0.136750      31.958221       0.000000       0.244794       0.236000   -9999.000000       0.097000       0.757000
57093     57093     henan          114.8472       34.8467          101       179     2012      07        23        205              0.129042      30.604156       0.000000       0.233907   -9999.000000       0.160600       0.143900   -9999.000000
57093     57093     henan          114.8472       34.8467          101       179     2012      07        24        206              0.158292      31.988922      16.737072       0.218747       0.260000       0.263800       0.156800       0.958000
57093     57093     henan          114.8472       34.8467          101       179     2012      07        25        207              0.170000      30.978424       1.152985       0.281204       0.229000       0.162900   -9999.000000   -9999.000000
57093     57093     henan          114.8472       34.8467          101       179     2012      07        26        208              0.158375      32.785065       0.000000       0.289195       0.234500       0.281800       0.102700       0.850000
57093     57093     henan          114.8472       34.8467          101       179     2012      07        27        209              0.149375      33.407806       2.635159       0.264261       0.197000       0.173600       0.176200       0.817000
57093     57093     henan          114.8472       34.8467          101       179     2012      07        28        210              0.142667      32.269684       0.000000       0.265892       0.200000   -9999.000000       0.136700       0.762000
57093     57093     henan          114.8472       34.8467          101       179     2012      07        29        211              0.134333      33.867676       0.457431       0.246259       0.235000       0.116200       0.141800       0.697000
57093     57093     henan          114.8472       34.8467          101       179     2012      07        30        212              0.126625      34.102081       0.338909       0.232240       0.236000   -9999.000000   -9999.000000   -9999.000000
57093     57093     henan          114.8472       34.8467          101       179     2012      07        31        213              0.126333      33.328522       5.756550       0.221180       0.250500       0.023600       0.099000       0.606000
57093     57093     henan          114.8472       34.8467          101       179     2012      08        01        214              0.155167      29.129547       0.270845       0.232717       0.322000       0.160600       0.058700       0.626000
57093     57093     henan          114.8472       34.8467          101       179     2012      08        02        215              0.147000      27.346985       0.000000       0.254848       0.270000   -9999.000000       0.094500       0.641000
57093     57093     henan          114.8472       34.8467          101       179     2012      08        03        216              0.139583      29.642914       0.642559       0.233123   -9999.000000       0.215900       0.081100       0.419000
57093     57093     henan          114.8472       34.8467          101       179     2012      08        04        217              0.144167      29.755188       9.445694       0.220381   -9999.000000   -9999.000000       0.095300   -9999.000000
57093     57093     henan          114.8472       34.8467          101       179     2012      08        05        218              0.144917      27.050354       0.724077       0.267273       0.267500       0.290900   -9999.000000       0.633000
57093     57093     henan          114.8472       34.8467          101       179     2012      08        06        219              0.139083      28.833313       0.000000       0.273584       0.301000   -9999.000000       0.124000   -9999.000000
57093     57093     henan          114.8472       34.8467          101       179     2012      08        07        220              0.132125      30.151642       0.000000       0.250531       0.256000   -9999.000000   -9999.000000       0.614000
57093     57093     henan          114.8472       34.8467          101       179     2012      08        08        221              0.126042      30.667267       0.213655       0.234764       0.246000       0.376600       0.160700       0.532000
57093     57093     henan          114.8472       34.8467          101       179     2012      08        09        222              0.122000      31.422729       0.000000       0.221774       0.297000   -9999.000000       0.143700   -9999.000000
57093     57093     henan          114.8472       34.8467          101       179     2012      08        10        223              0.142957      29.738037       3.112647       0.212011       0.300000       0.055000   -9999.000000       0.736000
57093     57093     henan          114.8472       34.8467          101       179     2012      08        11        224              0.158208      29.737488       1.630062       0.224033       0.269500       0.434500   -9999.000000   -9999.000000
57093     57093     henan          114.8472       34.8467          101       179     2012      08        12        225              0.149125      31.244324       0.000000       0.218699       0.301000       0.084400       0.087300       0.394000
57093     57093     henan          114.8472       34.8467          101       179     2012      08        13        226              0.144375      29.860718       0.237420       0.200856       0.308000       0.447800       0.191600   -9999.000000
57093     57093     henan          114.8472       34.8467          101       179     2012      08        14        227              0.145833      26.022919       0.000000       0.195566   -9999.000000   -9999.000000       0.159900   -9999.000000
57093     57093     henan          114.8472       34.8467          101       179     2012      08        15        228              0.141125      25.987671       0.338169       0.190204       0.287000   -9999.000000       0.165800       0.439000
57093     57093     henan          114.8472       34.8467          101       179     2012      08        16        229              0.134000      28.861115       0.254575       0.179465       0.256500       0.113700   -9999.000000   -9999.000000
57093     57093     henan          114.8472       34.8467          101       179     2012      08        17        230              0.129250      29.207397       0.000000       0.171584       0.266500   -9999.000000       0.178900       0.417000
57093     57093     henan          114.8472       34.8467          101       179     2012      08        18        231              0.138542      31.805786       9.757793       0.162176       0.253000       0.180700       0.143200   -9999.000000
57093     57093     henan          114.8472       34.8467          101       179     2012      08        19        232              0.152000      29.674622      35.571075       0.246133   -9999.000000       0.170800       0.140100       0.722000
57093     57093     henan          114.8472       34.8467          101       179     2012      08        20        233              0.207375      30.152039      41.571209       0.273748       0.312000   -9999.000000       0.204200       0.956000
57093     57093     henan          114.8472       34.8467          101       179     2012      08        21        234              0.196375      25.461395       1.136026       0.381550       0.262500       0.127400       0.205700   -9999.000000
57093     57093     henan          114.8472       34.8467          101       179     2012      08        22        235              0.186083      25.640442       1.558930       0.344203       0.258000   -9999.000000   -9999.000000   -9999.000000
57093     57093     henan          114.8472       34.8467          101       179     2012      08        23        236              0.178696      24.088470       0.000000       0.322154       0.260000       0.100800       0.142400   -9999.000000
57093     57093     henan          114.8472       34.8467          101       179     2012      08        24        237              0.173958      24.264465       0.000000       0.309054       0.266000       0.160400       0.219200       0.638000
57093     57093     henan          114.8472       34.8467          101       179     2012      08        25        238              0.000000      25.187500       0.359338       0.298602       0.315000       0.196700       0.169400       0.560000
57093     57093     henan          114.8472       34.8467          101       179     2012      08        26        239              0.167583      26.831635       2.025106       0.290147       0.324000       0.267900       0.191700       0.593000
57093     57093     henan          114.8472       34.8467          101       179     2012      08        27        240              0.166292      27.542084       0.000000       0.286205       0.339000   -9999.000000   -9999.000000       0.548000
57093     57093     henan          114.8472       34.8467          101       179     2012      08        28        241              0.164208      26.999481       0.000000       0.282183       0.303000       0.107800   -9999.000000   -9999.000000
57093     57093     henan          114.8472       34.8467          101       179     2012      08        29        242              0.160417      27.818665       0.000000       0.274267       0.254000       0.175800       0.090800       0.678000
57093     57093     henan          114.8472       34.8467          101       179     2012      08        30        243              0.156833      30.042267       0.000000       0.264641   -9999.000000       0.214400       0.174600       0.547000
57093     57093     henan          114.8472       34.8467          101       179     2012      08        31        244              0.156000      29.950623       1.726623       0.256565       0.321000       0.113800       0.134100       0.569000
57093     57093     henan          114.8472       34.8467          101       179     2012      09        01        245              0.160167      27.875427      35.256145       0.264091       0.161000   -9999.000000       0.160700       0.489000
57093     57093     henan          114.8472       34.8467          101       179     2012      09        02        246              0.191833      28.653900       1.598242       0.298941       0.279000   -9999.000000   -9999.000000   -9999.000000
57093     57093     henan          114.8472       34.8467          101       179     2012      09        03        247              0.183708      25.086334       0.000000       0.339016       0.211000   -9999.000000       0.160300       0.689000
57093     57093     henan          114.8472       34.8467          101       179     2012      09        04        248              0.177083      25.774323       0.000000       0.311784       0.228000   -9999.000000       0.141700   -9999.000000
57093     57093     henan          114.8472       34.8467          101       179     2012      09        05        249              0.171750      25.260254       0.000000       0.297754       0.246000       0.260700       0.168500       0.539000
57093     57093     henan          114.8472       34.8467          101       179     2012      09        06        250              0.167941      25.618988       0.121222       0.287413       0.253000       0.189000       0.136200       0.515000
57093     57093     henan          114.8472       34.8467          101       179     2012      09        07        251              0.165208      26.408783       0.701050       0.279641       0.235000   -9999.000000       0.152500   -9999.000000
57093     57093     henan          114.8472       34.8467          101       179     2012      09        08        252              0.162917      26.002167       0.232259       0.275788       0.259500   -9999.000000   -9999.000000       0.594000
57093     57093     henan          114.8472       34.8467          101       179     2012      09        09        253              0.160333      24.740997       0.285653       0.273111       0.229000   -9999.000000       0.104600   -9999.000000
57093     57093     henan          114.8472       34.8467          101       179     2012      09        10        254              0.158667      25.630798       1.305588       0.264813   -9999.000000       0.195400       0.202200       0.545000
57093     57093     henan          114.8472       34.8467          101       179     2012      09        11        255              0.193083      25.701080      22.875969       0.266936       0.243000       0.360800       0.194100   -9999.000000
57093     57093     henan          114.8472       34.8467          101       179     2012      09        12        256              0.185958      22.981598       0.000000       0.344669       0.201000   -9999.000000       0.200000   -9999.000000
57093     57093     henan          114.8472       34.8467          101       179     2012      09        13        257              0.178708      21.812347       0.255595       0.314024       0.185000       0.200600   -9999.000000       0.584000
57093     57093     henan          114.8472       34.8467          101       179     2012      09        14        258              0.173750      21.756042       0.000000       0.297725       0.173000   -9999.000000   -9999.000000   -9999.000000
57093     57093     henan          114.8472       34.8467          101       179     2012      09        15        259              0.169333      22.159271       0.000000       0.286948   -9999.000000       0.153100       0.111000       0.560000
57093     57093     henan          114.8472       34.8467          101       179     2012      09        16        260              0.166667      22.195435       0.318420       0.278052       0.221000       0.139400       0.208400   -9999.000000
57093     57093     henan          114.8472       34.8467          101       179     2012      09        17        261              0.165917      22.294434       0.000000       0.272834       0.176000   -9999.000000       0.135000       0.633000
57093     57093     henan          114.8472       34.8467          101       179     2012      09        18        262              0.164000      22.482147       0.000000       0.265492       0.199500       0.112000       0.151100       0.644000
57093     57093     henan          114.8472       34.8467          101       179     2012      09        19        263              0.161833      24.131744       4.012653       0.259312       0.178000   -9999.000000   -9999.000000   -9999.000000
57093     57093     henan          114.8472       34.8467          101       179     2012      09        20        264              0.159750      23.087524       0.000000       0.272323       0.180000   -9999.000000       0.136500       0.531000
57093     57093     henan          114.8472       34.8467          101       179     2012      09        21        265              0.158250      23.265991       0.837990       0.266800   -9999.000000       0.172500       0.142300   -9999.000000
57093     57093     henan          114.8472       34.8467          101       179     2012      09        22        266              0.158875      22.715118       0.344895       0.264229       0.183000       0.126000       0.170800       0.581000
57093     57093     henan          114.8472       34.8467          101       179     2012      09        23        267              0.156917      24.057251       0.000000       0.257294       0.177000       0.107200       0.156400       0.536000
57093     57093     henan          114.8472       34.8467          101       179     2012      09        24        268              0.154708      24.309387       0.000000       0.250658       0.173500       0.102800       0.142500       0.582000
57093     57093     henan          114.8472       34.8467          101       179     2012      09        25        269              0.154125      23.690735       0.272712       0.245381       0.184000   -9999.000000   -9999.000000       0.588000
57093     57093     henan          114.8472       34.8467          101       179     2012      09        26        270              0.153583      24.673798       0.379121       0.243629   -9999.000000       0.145800       0.085200   -9999.000000
57093     57093     henan          114.8472       34.8467          101       179     2012      09        27        271              0.153857      23.322052       0.000000       0.241319       0.169000   -9999.000000       0.144200       0.358000
57093     57093     henan          114.8472       34.8467          101       179     2012      09        28        272              0.146867      23.416809       0.000000       0.233114       0.125000   -9999.000000       0.131200       0.461000
57093     57093     henan          114.8472       34.8467          101       179     2012      09        29        273              0.145958      19.604858       0.000000       0.222921       0.181500   -9999.000000       0.146100       0.512000
57093     57093     henan          114.8472       34.8467          101       179     2012      09        30        274              0.144125      19.840515       0.186971       0.217578       0.177000   -9999.000000   -9999.000000       0.275000
57093     57093     henan          114.8472       34.8467          101       179     2012      10        01        275              0.142833      20.275940       0.000000       0.213094       0.126000       0.368900       0.110700   -9999.000000
57093     57093     henan          114.8472       34.8467          101       179     2012      10        02        276              0.141417      21.092377       0.000000       0.208851       0.122000   -9999.000000       0.057500       0.322000
57093     57093     henan          114.8472       34.8467          101       179     2012      10        03        277              0.138833      22.330902       0.000000       0.202854       0.120000       0.338900       0.115800   -9999.000000
57093     57093     henan          114.8472       34.8467          101       179     2012      10        04        278              0.137250      22.842468       0.000000       0.197612       0.130500       0.215900       0.106100       0.250000
57093     57093     henan          114.8472       34.8467          101       179     2012      10        05        279              0.135750      22.267029       0.000000       0.194615       0.135000       0.283100       0.115600       0.121000
57093     57093     henan          114.8472       34.8467          101       179     2012      10        06        280              0.135708      20.185669       0.000000       0.195631       0.137000       0.190400   -9999.000000   -9999.000000
57093     57093     henan          114.8472       34.8467          101       179     2012      10        07        281              0.134625      22.093872       0.282484       0.191981   -9999.000000   -9999.000000       0.092600       0.193000
57093     57093     henan          114.8472       34.8467          101       179     2012      10        08        282              0.134375      21.157471       0.000000       0.193424       0.132000       0.174400       0.091900   -9999.000000
57093     57093     henan          114.8472       34.8467          101       179     2012      10        09        283              0.133500      22.334930       0.000000       0.190630       0.111500       0.272700       0.102100       0.313000
57093     57093     henan          114.8472       34.8467          101       179     2012      10        10        284              0.131875      21.856537       0.241971       0.184838       0.133000       0.166900       0.100300   -9999.000000
57093     57093     henan          114.8472       34.8467          101       179     2012      10        11        285              0.130292      19.696381       0.000000       0.179980       0.102000       0.169700   -9999.000000   -9999.000000
57093     57093     henan          114.8472       34.8467          101       179     2012      10        12        286              0.129125      20.080841       0.000000       0.178270       0.111000       0.279400   -9999.000000       0.279000
57093     57093     henan          114.8472       34.8467          101       179     2012      10        13        287              0.128375      20.396088       0.000000       0.177586       0.105000   -9999.000000       0.041900   -9999.000000
57093     57093     henan          114.8472       34.8467          101       179     2012      10        14        288              0.127167      21.716003       0.000000       0.176091       0.098000       0.132200       0.101500       0.307000
57093     57093     henan          114.8472       34.8467          101       179     2012      10        15        289              0.129333      21.060425       6.950277       0.174171       0.134000   -9999.000000       0.083800   -9999.000000
57093     57093     henan          114.8472       34.8467          101       179     2012      10        16        290              0.145500      20.483765       0.000000       0.205640       0.180000       0.303500       0.143700       1.000000
57093     57093     henan          114.8472       34.8467          101       179     2012      10        17        291              0.142542      16.846649       0.000000       0.246540       0.127000       0.331000   -9999.000000       0.396000
57093     57093     henan          114.8472       34.8467          101       179     2012      10        18        292              0.139625      16.067963       0.286339       0.227834       0.118000   -9999.000000       0.104300   -9999.000000
57093     57093     henan          114.8472       34.8467          101       179     2012      10        19        293              0.137625      17.799744       0.000000       0.220279       0.117000       0.153200       0.067700       0.383000
57093     57093     henan          114.8472       34.8467          101       179     2012      10        20        294              0.135292      18.397156       0.000000       0.217355       0.114000   -9999.000000       0.107100   -9999.000000
57093     57093     henan          114.8472       34.8467          101       179     2012      10        21        295              0.135375      19.601013       4.104551       0.211295       0.112000       0.219500       0.090500       0.361000
57093     57093     henan          114.8472       34.8467          101       179     2012      10        22        296              0.136333      18.896027       0.630866       0.235013   -9999.000000       0.260900       0.095400       0.341000
57093     57093     henan          114.8472       34.8467          101       179     2012      10        23        297              0.134667      15.769501       0.000000       0.238044   -9999.000000   -9999.000000   -9999.000000       0.426000
57093     57093     henan          114.8472       34.8467          101       179     2012      10        24        298              0.133500      16.497559       0.000000       0.226514   -9999.000000       0.148600       0.060400       0.349000
57093     57093     henan          114.8472       34.8467          101       179     2012      10        25        299              0.000000      17.194061       0.000000       0.220234       0.091000   -9999.000000       0.095100   -9999.000000
57093     57093     henan          114.8472       34.8467          101       179     2012      10        26        300              0.130000      17.848175       0.203778       0.214862       0.125500       0.149000       0.085900       0.342000
57093     57093     henan          114.8472       34.8467          101       179     2012      10        27        301              0.129833      15.275940       0.000000       0.217557       0.096000       0.362200       0.088700       0.436000
57093     57093     henan          114.8472       34.8467          101       179     2012      10        28        302              0.000000      17.467163       2.154760       0.212763       0.099000   -9999.000000   -9999.000000       0.404000
57093     57093     henan          114.8472       34.8467          101       179     2012      10        29        303              0.121000      17.305145       0.000000       0.220865       0.122000       0.300400   -9999.000000       0.420000
57093     57093     henan          114.8472       34.8467          101       179     2012      10        30        304              0.121042      15.567322       0.000000       0.229621   -9999.000000   -9999.000000       0.039400   -9999.000000
57093     57093     henan          114.8472       34.8467          101       179     2012      10        31        305              0.120708      13.696533       0.412574       0.220246       0.103000   -9999.000000       0.097100       0.179000
57093     57093     henan          114.8472       34.8467          101       179     2012      11        01        306              0.120875      12.437134       0.000000       0.214223       0.103500       0.152200       0.082100   -9999.000000
57093     57093     henan          114.8472       34.8467          101       179     2012      11        02        307              0.121208      13.846130       0.000000       0.212833       0.100000   -9999.000000       0.091100       0.379000
57093     57093     henan          114.8472       34.8467          101       179     2012      11        03        308              0.119917      14.985199       1.911735       0.208376   -9999.000000       0.049300   -9999.000000       0.373000
57093     57093     henan          114.8472       34.8467          101       179     2012      11        04        309              0.118917       9.921204       1.627485       0.227326   -9999.000000       0.059900       0.097000   -9999.000000
57093     57093     henan          114.8472       34.8467          101       179     2012      11        05        310              0.118792       8.724182       0.000000       0.226037       0.081000   -9999.000000       0.082400       0.106000
57093     57093     henan          114.8472       34.8467          101       179     2012      11        06        311              0.118750       8.969330       0.000000       0.220047       0.110000       0.119500       0.102400   -9999.000000
57093     57093     henan          114.8472       34.8467          101       179     2012      11        07        312              0.118917      10.646271       0.054820       0.216282       0.111000   -9999.000000       0.099500       0.399000
57093     57093     henan          114.8472       34.8467          101       179     2012      11        08        313              0.118833      11.357452       0.000000       0.215136       0.116000       0.095100   -9999.000000   -9999.000000
57093     57093     henan          114.8472       34.8467          101       179     2012      11        09        314              0.118696      11.517639       3.166644       0.215059       0.161000       0.071000   -9999.000000   -9999.000000
57093     57093     henan          114.8472       34.8467          101       179     2012      11        10        315              0.117250      11.425812       1.341425       0.225051   -9999.000000   -9999.000000       0.056200       0.517000
57093     57093     henan          114.8472       34.8467          101       179     2012      11        11        316              0.116500       8.507263       0.000000       0.256729       0.099000       0.088000       0.106400   -9999.000000
57093     57093     henan          114.8472       34.8467          101       179     2012      11        12        317              0.116583       8.132782       0.000000       0.239729       0.101000   -9999.000000       0.083700       0.380000
57093     57093     henan          114.8472       34.8467          101       179     2012      11        13        318              0.000000       8.895508       0.000000       0.233586       0.101000       0.115800       0.094700   -9999.000000
57093     57093     henan          114.8472       34.8467          101       179     2012      11        14        319              0.116500       9.176697       0.000000       0.228726   -9999.000000       0.139300   -9999.000000       0.146000
57093     57093     henan          114.8472       34.8467          101       179     2012      11        15        320              0.116667       8.255463       0.444655       0.224791   -9999.000000       0.031000   -9999.000000       0.263000
57093     57093     henan          114.8472       34.8467          101       179     2012      11        16        321              0.116583       8.989044       0.000000       0.225282       0.105000       0.080100       0.046600   -9999.000000
57093     57093     henan          114.8472       34.8467          101       179     2012      11        17        322              0.000000       8.207550       0.000000       0.225928       0.101000   -9999.000000       0.104200       0.289000
57093     57093     henan          114.8472       34.8467          101       179     2012      11        18        323              0.116500      10.092255       0.000000       0.222904       0.103000   -9999.000000       0.085500   -9999.000000
57093     57093     henan          114.8472       34.8467          101       179     2012      11        19        324              0.116250      10.252472       0.000000       0.222416   -9999.000000       0.195400       0.092400       0.397000
57093     57093     henan          114.8472       34.8467          101       179     2012      11        20        325              0.116000       8.861389       0.000000       0.219723       0.110000   -9999.000000   -9999.000000       0.302000
57093     57093     henan          114.8472       34.8467          101       179     2012      11        21        326              0.116083       8.155670       0.177125       0.220156       0.069000       0.068400       0.077600       0.405000
57093     57093     henan          114.8472       34.8467          101       179     2012      11        22        327              0.116000       9.928528       0.155782       0.219892       0.103000       0.097100       0.079900       0.191000
57093     57093     henan          114.8472       34.8467          101       179     2012      11        23        328              0.115583       8.499207       0.000000       0.221276       0.095000   -9999.000000       0.101700   -9999.000000
57093     57093     henan          114.8472       34.8467          101       179     2012      11        24        329              0.115417       5.154449       1.111086       0.219491       0.099000       0.082000       0.091000       0.058000
57093     57093     henan          114.8472       34.8467          101       179     2012      11        25        330              0.115917       7.448364       3.726645       0.222669   -9999.000000   -9999.000000       0.122200       0.659000
57093     57093     henan          114.8472       34.8467          101       179     2012      11        26        331              0.119217       5.618103       0.000000       0.262923   -9999.000000       0.212800   -9999.000000       0.726000
57093     57093     henan          114.8472       34.8467          101       179     2012      11        27        332              0.120833       6.157043       0.113857       0.246826       0.108000       0.128200       0.037200       0.374000
57093     57093     henan          114.8472       34.8467          101       179     2012      11        28        333              0.121000       7.953033       0.049988       0.241562   -9999.000000   -9999.000000       0.110700   -9999.000000
57093     57093     henan          114.8472       34.8467          101       179     2012      11        29        334              0.121000       5.321747       0.000000       0.234092       0.106000       0.152900       0.088300       0.191000
57093     57093     henan          114.8472       34.8467          101       179     2012      11        30        335              0.120792       4.860718       0.000000       0.232874   -9999.000000   -9999.000000       0.099800   -9999.000000
57093     57093     henan          114.8472       34.8467          101       179     2012      12        01        336              0.120000       4.023438       0.138620       0.229543   -9999.000000       0.096700   -9999.000000       0.264000
57093     57093     henan          114.8472       34.8467          101       179     2012      12        02        337              0.120000       1.982605       0.000000       0.225298   -9999.000000       0.229200       0.102300       0.225000
57093     57093     henan          114.8472       34.8467          101       179     2012      12        03        338              0.120042       3.209320       0.000000       0.234456       0.100000       0.247500       0.056900   -9999.000000
57093     57093     henan          114.8472       34.8467          101       179     2012      12        04        339              0.119500       4.253601       0.000000       0.221751       0.099000       0.135000       0.108400       0.108000
57093     57093     henan          114.8472       34.8467          101       179     2012      12        05        340              0.118667       4.456329       0.000000       0.224728       0.101000   -9999.000000       0.087200   -9999.000000
57093     57093     henan          114.8472       34.8467          101       179     2012      12        06        341              0.118250       3.898132       0.041675       0.216542   -9999.000000   -9999.000000       0.101300       0.241000
57093     57093     henan          114.8472       34.8467          101       179     2012      12        07        342              0.117583       3.503540       0.000000       0.213513   -9999.000000       0.134400   -9999.000000   -9999.000000
57093     57093     henan          114.8472       34.8467          101       179     2012      12        08        343              0.116542       3.184479       0.000000       0.210416   -9999.000000   -9999.000000       0.057200   -9999.000000
57093     57093     henan          114.8472       34.8467          101       179     2012      12        09        344              0.115125       1.829041       0.000000       0.196035   -9999.000000       0.177200       0.089000       0.049000
57093     57093     henan          114.8472       34.8467          101       179     2012      12        10        345              0.114625       1.124481       0.000000       0.186848   -9999.000000       0.053000       0.076000   -9999.000000
57093     57093     henan          114.8472       34.8467          101       179     2012      12        11        346              0.110250       1.388275       0.000000       0.190205   -9999.000000   -9999.000000       0.090000       0.204000
57093     57093     henan          114.8472       34.8467          101       179     2012      12        12        347              0.110208       0.151367       0.000000       0.179801   -9999.000000       0.036200   -9999.000000   -9999.000000
57093     57093     henan          114.8472       34.8467          101       179     2012      12        13        348              0.116000       1.960541       1.362212       0.207224   -9999.000000   -9999.000000   -9999.000000       0.063000
57093     57093     henan          114.8472       34.8467          101       179     2012      12        14        349              0.116000       0.943634       1.436075       0.205653   -9999.000000       0.273200       0.055700       0.420000
57093     57093     henan          114.8472       34.8467          101       179     2012      12        15        350              0.000000       1.361816       0.128689       0.227128   -9999.000000       0.158200       0.142100   -9999.000000
57093     57093     henan          114.8472       34.8467          101       179     2012      12        16        351              0.152833       1.357666       0.179507       0.228683   -9999.000000   -9999.000000       0.108500       0.688000
57093     57093     henan          114.8472       34.8467          101       179     2012      12        17        352              0.157042       1.838287       0.000000       0.235600   -9999.000000   -9999.000000       0.118600   -9999.000000
57093     57093     henan          114.8472       34.8467          101       179     2012      12        18        353              0.151542       1.596710       0.000000       0.222131   -9999.000000   -9999.000000   -9999.000000       0.406000
57093     57093     henan          114.8472       34.8467          101       179     2012      12        19        354              0.145792       0.701385       0.000000       0.196030   -9999.000000       0.105900       0.088000       0.322000
57093     57093     henan          114.8472       34.8467          101       179     2012      12        20        355              0.000000       0.371002       0.129270       0.192247   -9999.000000       0.121000       0.059600       0.370000
57093     57093     henan          114.8472       34.8467          101       179     2012      12        21        356              0.145875       0.422302       0.168085       0.196191   -9999.000000       0.303900       0.077100       0.267000
57093     57093     henan          114.8472       34.8467          101       179     2012      12        22        357              0.145875      -0.149567       0.102688       0.184354   -9999.000000       0.055000       0.081000   -9999.000000
57093     57093     henan          114.8472       34.8467          101       179     2012      12        23        358              0.137625       0.109650       0.000000       0.189800   -9999.000000   -9999.000000   -9999.000000       0.014000
57093     57093     henan          114.8472       34.8467          101       179     2012      12        24        359              0.127350      -2.143829       0.000000       0.156944   -9999.000000       0.114700   -9999.000000       0.018000
57093     57093     henan          114.8472       34.8467          101       179     2012      12        25        360              0.117458      -0.686615       0.000000       0.172425   -9999.000000       0.095000       0.029900       0.124000
57093     57093     henan          114.8472       34.8467          101       179     2012      12        26        361              0.000000      -1.918823       0.000000       0.160475   -9999.000000   -9999.000000       0.104500   -9999.000000
57093     57093     henan          114.8472       34.8467          101       179     2012      12        27        362              0.122083      -1.001953       0.209427       0.163707   -9999.000000   -9999.000000       0.099300   -9999.000000
57093     57093     henan          114.8472       34.8467          101       179     2012      12        28        363              0.133000      -0.008392       0.103130       0.180860   -9999.000000   -9999.000000       0.127200       0.302000
57093     57093     henan          114.8472       34.8467          101       179     2012      12        29        364              0.000000       0.219055       0.055636       0.186750   -9999.000000       0.211800   -9999.000000   -9999.000000
57093     57093     henan          114.8472       34.8467          101       179     2012      12        30        365              0.000000      -0.965973       0.000000       0.172824   -9999.000000       0.127100   -9999.000000       0.177000
57093     57093     henan          114.8472       34.8467          101       179     2012      12        31        366              0.120867      -0.239410       0.000000       0.176839   -9999.000000   -9999.000000       0.023100   -9999.000000
