# Supplementary material for: Research on Fusing Multisatellite Soil Moisture Data Based on Bayesian Model Averaging
Source: Hindawi journal article supplement (doi:10.1155/2018/9310838), 2018-06-25
Supplement: f1 [file 9310838.f1.zip › 2012_sm00-10cm_daily_ZDB_ZHY_57102_366days_allin.txt]

57102     57102     gansu          105.7200       33.7600          105       143     2012      01        01        001              0.000000   -9999.000000       0.000000   -9999.000000       0.086000   -9999.000000   -9999.000000   -9999.000000
57102     57102     gansu          105.7200       33.7600          105       143     2012      01        02        002              0.235833      -0.120758       0.000000       0.165173       0.091000   -9999.000000   -9999.000000   -9999.000000
57102     57102     gansu          105.7200       33.7600          105       143     2012      01        03        003              0.000000       0.311768       0.000000       0.180260   -9999.000000   -9999.000000       0.065000   -9999.000000
57102     57102     gansu          105.7200       33.7600          105       143     2012      01        04        004              0.231083      -1.728760       0.000000       0.146577   -9999.000000   -9999.000000       0.072000       0.194000
57102     57102     gansu          105.7200       33.7600          105       143     2012      01        05        005              0.233083      -0.727051       0.000000       0.152377   -9999.000000   -9999.000000       0.070200   -9999.000000
57102     57102     gansu          105.7200       33.7600          105       143     2012      01        06        006              0.232826      -0.710724       0.000000       0.148320   -9999.000000   -9999.000000       0.070700       0.088000
57102     57102     gansu          105.7200       33.7600          105       143     2012      01        07        007              0.233609      -1.113831       0.000000       0.136038   -9999.000000   -9999.000000   -9999.000000   -9999.000000
57102     57102     gansu          105.7200       33.7600          105       143     2012      01        08        008              0.000000      -0.276825       0.000000       0.163923   -9999.000000   -9999.000000       0.070700       0.082000
57102     57102     gansu          105.7200       33.7600          105       143     2012      01        09        009              0.232958      -0.519745       0.000000       0.159906   -9999.000000   -9999.000000   -9999.000000       0.235000
57102     57102     gansu          105.7200       33.7600          105       143     2012      01        10        010              0.232417       0.130371       0.000000       0.175077   -9999.000000   -9999.000000       0.053900   -9999.000000
57102     57102     gansu          105.7200       33.7600          105       143     2012      01        11        011              0.232783      -0.280853       0.000000       0.166339   -9999.000000   -9999.000000       0.054300       0.190000
57102     57102     gansu          105.7200       33.7600          105       143     2012      01        12        012              0.232917       0.154327       0.000000       0.175736   -9999.000000   -9999.000000       0.058200   -9999.000000
57102     57102     gansu          105.7200       33.7600          105       143     2012      01        13        013              0.233375       0.091125       0.000000       0.174503   -9999.000000   -9999.000000   -9999.000000       0.276000
57102     57102     gansu          105.7200       33.7600          105       143     2012      01        14        014              0.232583       0.454193       0.145772       0.186284   -9999.000000   -9999.000000       0.055500       0.179000
57102     57102     gansu          105.7200       33.7600          105       143     2012      01        15        015              0.231696       0.631775       0.000000       0.187857   -9999.000000       0.015200       0.059000       0.115000
57102     57102     gansu          105.7200       33.7600          105       143     2012      01        16        016              0.232625      -0.406616       0.000000       0.159291       0.082000   -9999.000000       0.045700       0.194000
57102     57102     gansu          105.7200       33.7600          105       143     2012      01        17        017              0.000000       0.226654       0.000000       0.181585       0.085000   -9999.000000       0.048200   -9999.000000
57102     57102     gansu          105.7200       33.7600          105       143     2012      01        18        018              0.232958       1.407379       0.000000       0.205650   -9999.000000   -9999.000000   -9999.000000       0.221000
57102     57102     gansu          105.7200       33.7600          105       143     2012      01        19        019              0.232917       0.839569       0.000000       0.197219   -9999.000000   -9999.000000   -9999.000000   -9999.000000
57102     57102     gansu          105.7200       33.7600          105       143     2012      01        20        020              0.234542       0.414917       0.000000       0.187855   -9999.000000   -9999.000000       0.043900       0.190000
57102     57102     gansu          105.7200       33.7600          105       143     2012      01        21        021              0.241708       0.090820       0.000000       0.179950   -9999.000000   -9999.000000       0.041500       0.174000
57102     57102     gansu          105.7200       33.7600          105       143     2012      01        22        022              0.248261      -1.032440       0.000000       0.158348   -9999.000000   -9999.000000       0.043500   -9999.000000
57102     57102     gansu          105.7200       33.7600          105       143     2012      01        23        023              0.247652      -2.184631       0.000000       0.130410   -9999.000000   -9999.000000       0.044000       0.111000
57102     57102     gansu          105.7200       33.7600          105       143     2012      01        24        024              0.244208      -2.556427       0.000000       0.129217   -9999.000000   -9999.000000   -9999.000000   -9999.000000
57102     57102     gansu          105.7200       33.7600          105       143     2012      01        25        025              0.238708      -2.791168       0.000000       0.134564   -9999.000000   -9999.000000       0.041500       0.062000
57102     57102     gansu          105.7200       33.7600          105       143     2012      01        26        026              0.239833      -0.984985       0.000000       0.148670       0.082000   -9999.000000       0.039300   -9999.000000
57102     57102     gansu          105.7200       33.7600          105       143     2012      01        27        027              0.237750      -0.794922       0.000000       0.160023   -9999.000000   -9999.000000       0.043100   -9999.000000
57102     57102     gansu          105.7200       33.7600          105       143     2012      01        28        028              0.238208      -0.163971       0.000000       0.165542       0.093000   -9999.000000       0.046500       0.299000
57102     57102     gansu          105.7200       33.7600          105       143     2012      01        29        029              0.237750       1.277100       0.000000       0.195143   -9999.000000   -9999.000000   -9999.000000   -9999.000000
57102     57102     gansu          105.7200       33.7600          105       143     2012      01        30        030              0.237292       0.989716       0.000000       0.199081   -9999.000000   -9999.000000   -9999.000000       0.234000
57102     57102     gansu          105.7200       33.7600          105       143     2012      01        31        031              0.236500       1.342773       0.000000       0.207536       0.091000   -9999.000000       0.036200   -9999.000000
57102     57102     gansu          105.7200       33.7600          105       143     2012      02        01        032              0.235042       1.477905       0.000000       0.215270       0.075000   -9999.000000       0.034300   -9999.000000
57102     57102     gansu          105.7200       33.7600          105       143     2012      02        02        033              0.233958       2.248352       0.000000       0.221293   -9999.000000   -9999.000000       0.039400       0.187000
57102     57102     gansu          105.7200       33.7600          105       143     2012      02        03        034              0.231625       0.899261       0.000000       0.195043   -9999.000000   -9999.000000       0.037000   -9999.000000
57102     57102     gansu          105.7200       33.7600          105       143     2012      02        04        035              0.232917       0.006378       0.000000       0.171240   -9999.000000   -9999.000000   -9999.000000       0.191000
57102     57102     gansu          105.7200       33.7600          105       143     2012      02        05        036              0.231583       1.457245       0.000000       0.203700   -9999.000000   -9999.000000   -9999.000000   -9999.000000
57102     57102     gansu          105.7200       33.7600          105       143     2012      02        06        037              0.232250       2.265533       0.000000       0.222023       0.081000   -9999.000000       0.047200       0.462000
57102     57102     gansu          105.7200       33.7600          105       143     2012      02        07        038              0.230792       2.748383       0.000000       0.216313   -9999.000000       0.017500       0.043800       0.247000
57102     57102     gansu          105.7200       33.7600          105       143     2012      02        08        039              0.230083       0.879303       0.000000       0.193204       0.084000   -9999.000000       0.046000   -9999.000000
57102     57102     gansu          105.7200       33.7600          105       143     2012      02        09        040              0.229636       1.351471       0.000000       0.198274   -9999.000000   -9999.000000       0.044000       0.142000
57102     57102     gansu          105.7200       33.7600          105       143     2012      02        10        041              0.228417       0.028503       0.000000       0.175374   -9999.000000   -9999.000000   -9999.000000   -9999.000000
57102     57102     gansu          105.7200       33.7600          105       143     2012      02        11        042              0.226792      -0.097046       0.000000       0.171206   -9999.000000   -9999.000000       0.049300       0.141000
57102     57102     gansu          105.7200       33.7600          105       143     2012      02        12        043              0.228125      -0.714478       0.000000       0.151044   -9999.000000   -9999.000000   -9999.000000       0.153000
57102     57102     gansu          105.7200       33.7600          105       143     2012      02        13        044              0.228042       0.315704       0.000000       0.178388   -9999.000000   -9999.000000       0.033500       0.149000
57102     57102     gansu          105.7200       33.7600          105       143     2012      02        14        045              0.228500       0.485687       0.000000       0.183323   -9999.000000   -9999.000000   -9999.000000       0.225000
57102     57102     gansu          105.7200       33.7600          105       143     2012      02        15        046              0.228042       1.994293       0.000000       0.209909   -9999.000000   -9999.000000   -9999.000000   -9999.000000
57102     57102     gansu          105.7200       33.7600          105       143     2012      02        16        047              0.227696       1.646149       0.000000       0.214497   -9999.000000   -9999.000000   -9999.000000       0.205000
57102     57102     gansu          105.7200       33.7600          105       143     2012      02        17        048              0.226458       1.157471       0.000000       0.201037   -9999.000000   -9999.000000       0.030900       0.176000
57102     57102     gansu          105.7200       33.7600          105       143     2012      02        18        049              0.226792       0.011414       0.000000       0.176237   -9999.000000   -9999.000000       0.034600       0.192000
57102     57102     gansu          105.7200       33.7600          105       143     2012      02        19        050              0.226667       0.426208       0.000000       0.183751   -9999.000000   -9999.000000       0.034500       0.146000
57102     57102     gansu          105.7200       33.7600          105       143     2012      02        20        051              0.226958       0.234558       0.000000       0.178942   -9999.000000   -9999.000000       0.047600   -9999.000000
57102     57102     gansu          105.7200       33.7600          105       143     2012      02        21        052              0.228500       0.658386       0.209730       0.189807       0.078000   -9999.000000   -9999.000000       0.291000
57102     57102     gansu          105.7200       33.7600          105       143     2012      02        22        053              0.230500       3.292755       0.160645       0.229530       0.076000   -9999.000000   -9999.000000   -9999.000000
57102     57102     gansu          105.7200       33.7600          105       143     2012      02        23        054              0.229500       5.118439       0.000000       0.242224       0.073000   -9999.000000       0.046500       0.283000
57102     57102     gansu          105.7200       33.7600          105       143     2012      02        24        055              0.227583       3.413177       0.000000       0.243366   -9999.000000   -9999.000000       0.043600       0.190000
57102     57102     gansu          105.7200       33.7600          105       143     2012      02        25        056              0.225708       2.235687       0.000000       0.224984   -9999.000000   -9999.000000       0.045100   -9999.000000
57102     57102     gansu          105.7200       33.7600          105       143     2012      02        26        057              0.226458       0.754517       0.057766       0.194630       0.076000   -9999.000000       0.048500       0.299000
57102     57102     gansu          105.7200       33.7600          105       143     2012      02        27        058              0.226833       2.208740       0.214430       0.213440       0.071000   -9999.000000   -9999.000000   -9999.000000
57102     57102     gansu          105.7200       33.7600          105       143     2012      02        28        059              0.225478       2.623199       0.000000       0.227353   -9999.000000   -9999.000000   -9999.000000       0.152000
57102     57102     gansu          105.7200       33.7600          105       143     2012      02        29        060              0.000000   -9999.000000       0.145264   -9999.000000       0.074000   -9999.000000   -9999.000000   -9999.000000
57102     57102     gansu          105.7200       33.7600          105       143     2012      03        01        061              0.228083       1.323029       0.280815       0.217060   -9999.000000   -9999.000000       0.044600   -9999.000000
57102     57102     gansu          105.7200       33.7600          105       143     2012      03        02        062              0.227091       3.689911       0.000000       0.238618   -9999.000000   -9999.000000       0.047700       0.366000
57102     57102     gansu          105.7200       33.7600          105       143     2012      03        03        063              0.226250       2.507202       1.084029       0.240846   -9999.000000   -9999.000000   -9999.000000   -9999.000000
57102     57102     gansu          105.7200       33.7600          105       143     2012      03        04        064              0.225125       2.092468       0.364253       0.236266   -9999.000000   -9999.000000   -9999.000000       0.344000
57102     57102     gansu          105.7200       33.7600          105       143     2012      03        05        065              0.224739       1.712524       0.000000       0.229311   -9999.000000   -9999.000000       0.052800   -9999.000000
57102     57102     gansu          105.7200       33.7600          105       143     2012      03        06        066              0.226130       2.020203       0.000000       0.228339   -9999.000000       0.042600       0.049500       0.471000
57102     57102     gansu          105.7200       33.7600          105       143     2012      03        07        067              0.000000       3.473480       1.944865       0.239873   -9999.000000   -9999.000000       0.052300       0.477000
57102     57102     gansu          105.7200       33.7600          105       143     2012      03        08        068              0.228917       3.203369       2.497423       0.241030   -9999.000000   -9999.000000       0.055200   -9999.000000
57102     57102     gansu          105.7200       33.7600          105       143     2012      03        09        069              0.232818       2.792511       0.000000       0.239846       0.099000   -9999.000000   -9999.000000       0.400000
57102     57102     gansu          105.7200       33.7600          105       143     2012      03        10        070              0.233125       4.248871       0.000000       0.243719       0.095000   -9999.000000       0.049300   -9999.000000
57102     57102     gansu          105.7200       33.7600          105       143     2012      03        11        071              0.231833       6.132233       0.000000       0.247997   -9999.000000   -9999.000000       0.051300       0.596000
57102     57102     gansu          105.7200       33.7600          105       143     2012      03        12        072              0.231609       5.378082       0.000000       0.249943   -9999.000000   -9999.000000       0.056700       0.541000
57102     57102     gansu          105.7200       33.7600          105       143     2012      03        13        073              0.231708       5.489807       0.000000       0.249947       0.075500   -9999.000000       0.057400       0.545000
57102     57102     gansu          105.7200       33.7600          105       143     2012      03        14        074              0.230375       8.269135       0.184099       0.249551       0.082000   -9999.000000   -9999.000000       0.406000
57102     57102     gansu          105.7200       33.7600          105       143     2012      03        15        075              0.229913       6.720245       0.438812       0.250508       0.072000   -9999.000000   -9999.000000   -9999.000000
57102     57102     gansu          105.7200       33.7600          105       143     2012      03        16        076              0.231591       6.389984       0.000000       0.251423       0.076000   -9999.000000       0.056900       0.519000
57102     57102     gansu          105.7200       33.7600          105       143     2012      03        17        077              0.232167      10.313568       0.000000       0.247234       0.078000   -9999.000000       0.059300   -9999.000000
57102     57102     gansu          105.7200       33.7600          105       143     2012      03        18        078              0.232826      12.535339       2.545717       0.243419       0.080000   -9999.000000       0.055100       0.509000
57102     57102     gansu          105.7200       33.7600          105       143     2012      03        19        079              0.232875      13.193359       0.000000       0.250701       0.086000   -9999.000000       0.070300       0.643000
57102     57102     gansu          105.7200       33.7600          105       143     2012      03        20        080              0.232167      12.638794       0.337553       0.251262       0.077000   -9999.000000   -9999.000000   -9999.000000
57102     57102     gansu          105.7200       33.7600          105       143     2012      03        21        081              0.229043      10.159637       0.484973       0.250722       0.112000   -9999.000000   -9999.000000       0.683000
57102     57102     gansu          105.7200       33.7600          105       143     2012      03        22        082              0.226125       7.365784       0.000000       0.254544   -9999.000000   -9999.000000       0.067700   -9999.000000
57102     57102     gansu          105.7200       33.7600          105       143     2012      03        23        083              0.226583       5.218536       0.000000       0.251390   -9999.000000   -9999.000000       0.065700       0.417000
57102     57102     gansu          105.7200       33.7600          105       143     2012      03        24        084              0.228458       7.850433       0.000000       0.245498       0.085000       0.028500       0.060500   -9999.000000
57102     57102     gansu          105.7200       33.7600          105       143     2012      03        25        085              0.000000      10.271973       0.206771       0.242596       0.079000   -9999.000000       0.062200   -9999.000000
57102     57102     gansu          105.7200       33.7600          105       143     2012      03        26        086              0.229083      12.132568       0.000000       0.239015       0.081000   -9999.000000   -9999.000000       0.647000
57102     57102     gansu          105.7200       33.7600          105       143     2012      03        27        087              0.229667      12.621674       5.066523       0.236774   -9999.000000   -9999.000000       0.077800   -9999.000000
57102     57102     gansu          105.7200       33.7600          105       143     2012      03        28        088              0.274083      13.458038       9.445800       0.245131       0.101000   -9999.000000       0.079500       0.638000
57102     57102     gansu          105.7200       33.7600          105       143     2012      03        29        089              0.273333      10.520905       0.106270       0.291201       0.102000       0.073900       0.081000   -9999.000000
57102     57102     gansu          105.7200       33.7600          105       143     2012      03        30        090              0.263000      13.460571       0.000000       0.267638       0.089000   -9999.000000       0.074600   -9999.000000
57102     57102     gansu          105.7200       33.7600          105       143     2012      03        31        091              0.257500       9.771332       0.355041       0.259432       0.080000   -9999.000000       0.069900       0.520000
57102     57102     gansu          105.7200       33.7600          105       143     2012      04        01        092              0.252167      12.876099       0.000000       0.254068   -9999.000000       0.028000   -9999.000000   -9999.000000
57102     57102     gansu          105.7200       33.7600          105       143     2012      04        02        093              0.246042      13.950409       0.523362       0.250227       0.091000   -9999.000000       0.077200       0.426000
57102     57102     gansu          105.7200       33.7600          105       143     2012      04        03        094              0.242292      12.780151       0.093235       0.243611       0.078000       0.109600       0.079600   -9999.000000
57102     57102     gansu          105.7200       33.7600          105       143     2012      04        04        095              0.241000      14.413330       0.000000       0.239192       0.076000   -9999.000000       0.069700       0.753000
57102     57102     gansu          105.7200       33.7600          105       143     2012      04        05        096              0.236000      16.033875       0.236888       0.234582       0.069000   -9999.000000       0.075200       0.449000
57102     57102     gansu          105.7200       33.7600          105       143     2012      04        06        097              0.232083      14.228302       0.071201       0.234067       0.099000   -9999.000000   -9999.000000   -9999.000000
57102     57102     gansu          105.7200       33.7600          105       143     2012      04        07        098              0.233000      11.507202       0.000000       0.236979       0.085000   -9999.000000   -9999.000000       0.451000
57102     57102     gansu          105.7200       33.7600          105       143     2012      04        08        099              0.231708      14.014404       0.000000       0.234411       0.085000   -9999.000000       0.075500   -9999.000000
57102     57102     gansu          105.7200       33.7600          105       143     2012      04        09        100              0.226750      15.320801       0.000000       0.230769       0.077000   -9999.000000       0.082500       0.475000
57102     57102     gansu          105.7200       33.7600          105       143     2012      04        10        101              0.228042      12.273376       2.699706       0.232230       0.067000   -9999.000000       0.072100       0.531000
57102     57102     gansu          105.7200       33.7600          105       143     2012      04        11        102              0.227917      16.596893      13.625179       0.235907       0.089000       0.052900       0.073000       0.705000
57102     57102     gansu          105.7200       33.7600          105       143     2012      04        12        103              0.225208      15.233948       0.262420       0.274293   -9999.000000   -9999.000000   -9999.000000       0.578000
57102     57102     gansu          105.7200       33.7600          105       143     2012      04        13        104              0.224625      10.583954       0.000000       0.273541       0.111000   -9999.000000       0.090500   -9999.000000
57102     57102     gansu          105.7200       33.7600          105       143     2012      04        14        105              0.225667      12.766998       2.602783       0.259884       0.088000       0.079100       0.081900       0.419000
57102     57102     gansu          105.7200       33.7600          105       143     2012      04        15        106              0.225208      15.276367       0.295047       0.257242       0.096000   -9999.000000       0.082900   -9999.000000
57102     57102     gansu          105.7200       33.7600          105       143     2012      04        16        107              0.222292      15.638763       3.115719       0.259121       0.109000       0.008000       0.084300       0.673000
57102     57102     gansu          105.7200       33.7600          105       143     2012      04        17        108              0.221583      14.615265       0.000000       0.264007   -9999.000000   -9999.000000       0.086300       0.425000
57102     57102     gansu          105.7200       33.7600          105       143     2012      04        18        109              0.222625      13.083191       0.000000       0.259164       0.102000   -9999.000000   -9999.000000   -9999.000000
57102     57102     gansu          105.7200       33.7600          105       143     2012      04        19        110              0.219250      16.190765       2.967436       0.250719       0.109000   -9999.000000       0.089700       0.576000
57102     57102     gansu          105.7200       33.7600          105       143     2012      04        20        111              0.218958      13.049622       0.000000       0.262513       0.095000   -9999.000000       0.091000   -9999.000000
57102     57102     gansu          105.7200       33.7600          105       143     2012      04        21        112              0.220000      15.724670       3.024414       0.250890       0.119000   -9999.000000       0.071200       0.513000
57102     57102     gansu          105.7200       33.7600          105       143     2012      04        22        113              0.220750      17.638092       0.000000       0.255639   -9999.000000   -9999.000000   -9999.000000   -9999.000000
57102     57102     gansu          105.7200       33.7600          105       143     2012      04        23        114              0.219250      18.394836       1.892725       0.249165       0.154000   -9999.000000   -9999.000000   -9999.000000
57102     57102     gansu          105.7200       33.7600          105       143     2012      04        24        115              0.222333      15.583405       0.246094       0.256074       0.131500       0.033300   -9999.000000       0.616000
57102     57102     gansu          105.7200       33.7600          105       143     2012      04        25        116              0.000000      16.365692       0.000000       0.244342       0.113000   -9999.000000       0.103400   -9999.000000
57102     57102     gansu          105.7200       33.7600          105       143     2012      04        26        117              0.221083      16.117340       0.000000       0.236289       0.092000   -9999.000000       0.107900       0.488000
57102     57102     gansu          105.7200       33.7600          105       143     2012      04        27        118              0.221042      18.058075       0.000000       0.229672       0.103000   -9999.000000       0.096100   -9999.000000
57102     57102     gansu          105.7200       33.7600          105       143     2012      04        28        119              0.220708      19.323120       0.620557       0.224363       0.130000   -9999.000000       0.100000   -9999.000000
57102     57102     gansu          105.7200       33.7600          105       143     2012      04        29        120              0.220000      19.930481       0.000000       0.223147       0.125000       0.051200   -9999.000000       0.577000
57102     57102     gansu          105.7200       33.7600          105       143     2012      04        30        121              0.213000      19.984253       0.293066       0.217764       0.144500   -9999.000000       0.091900   -9999.000000
57102     57102     gansu          105.7200       33.7600          105       143     2012      05        01        122              0.214333      15.766449       0.000000       0.220291       0.142500   -9999.000000       0.077900       0.417000
57102     57102     gansu          105.7200       33.7600          105       143     2012      05        02        123              0.211739      17.202576       1.610680       0.218682       0.168000   -9999.000000       0.091200   -9999.000000
57102     57102     gansu          105.7200       33.7600          105       143     2012      05        03        124              0.243167      15.700714       3.509610       0.226443   -9999.000000   -9999.000000       0.086500       0.951000
57102     57102     gansu          105.7200       33.7600          105       143     2012      05        04        125              0.264083      15.906921       1.015215       0.251430       0.170000   -9999.000000   -9999.000000       0.682000
57102     57102     gansu          105.7200       33.7600          105       143     2012      05        05        126              0.267792      17.359131       0.168638       0.245480       0.163000   -9999.000000   -9999.000000   -9999.000000
57102     57102     gansu          105.7200       33.7600          105       143     2012      05        06        127              0.268167      17.746674       0.953045       0.239257       0.169000   -9999.000000       0.085500       0.875000
57102     57102     gansu          105.7200       33.7600          105       143     2012      05        07        128              0.277917      16.208710       0.349057       0.241717   -9999.000000       0.260800       0.134700   -9999.000000
57102     57102     gansu          105.7200       33.7600          105       143     2012      05        08        129              0.272500      19.661713       0.045751       0.237805   -9999.000000   -9999.000000       0.118400       0.777000
57102     57102     gansu          105.7200       33.7600          105       143     2012      05        09        130              0.262435      20.883759       0.985299       0.228865   -9999.000000       0.272400       0.112800       0.561000
57102     57102     gansu          105.7200       33.7600          105       143     2012      05        10        131              0.251208      21.883148       4.701558       0.225655       0.144500   -9999.000000   -9999.000000       0.633000
57102     57102     gansu          105.7200       33.7600          105       143     2012      05        11        132              0.267958      18.736664       2.493967       0.240065       0.201000   -9999.000000   -9999.000000       0.620000
57102     57102     gansu          105.7200       33.7600          105       143     2012      05        12        133              0.264833      19.922272       0.135551       0.246034       0.200000       0.068700       0.120800   -9999.000000
57102     57102     gansu          105.7200       33.7600          105       143     2012      05        13        134              0.280958      17.185608       5.302648       0.240457       0.276000   -9999.000000       0.136800       0.689000
57102     57102     gansu          105.7200       33.7600          105       143     2012      05        14        135              0.279000      12.874176       0.205054       0.260121       0.207000   -9999.000000       0.153900   -9999.000000
57102     57102     gansu          105.7200       33.7600          105       143     2012      05        15        136              0.270304      16.657990       0.613883       0.246131       0.177000   -9999.000000       0.153300       0.709000
57102     57102     gansu          105.7200       33.7600          105       143     2012      05        16        137              0.261708      18.368195       0.000000       0.234991       0.172500   -9999.000000   -9999.000000       0.456000
57102     57102     gansu          105.7200       33.7600          105       143     2012      05        17        138              0.251792      19.294617       0.000000       0.226357       0.134000       0.137200       0.161900   -9999.000000
57102     57102     gansu          105.7200       33.7600          105       143     2012      05        18        139              0.244292      19.766083       1.179476       0.217985       0.157000   -9999.000000       0.151000       0.586000
57102     57102     gansu          105.7200       33.7600          105       143     2012      05        19        140              0.242250      20.379150       0.000000       0.216935       0.184000   -9999.000000       0.162800   -9999.000000
57102     57102     gansu          105.7200       33.7600          105       143     2012      05        20        141              0.236583      21.851349       6.636740       0.208759   -9999.000000   -9999.000000       0.169000       0.686000
57102     57102     gansu          105.7200       33.7600          105       143     2012      05        21        142              0.255917      19.454010      14.462588       0.218965       0.341000   -9999.000000   -9999.000000   -9999.000000
57102     57102     gansu          105.7200       33.7600          105       143     2012      05        22        143              0.285250      16.960236       5.414147       0.286567       0.298500       0.199100   -9999.000000   -9999.000000
57102     57102     gansu          105.7200       33.7600          105       143     2012      05        23        144              0.280875      15.995453       1.218598       0.289623   -9999.000000   -9999.000000       0.156700       0.776000
57102     57102     gansu          105.7200       33.7600          105       143     2012      05        24        145              0.282500      15.160858       0.041339       0.271198   -9999.000000   -9999.000000       0.155400   -9999.000000
57102     57102     gansu          105.7200       33.7600          105       143     2012      05        25        146              0.000000      16.449677       0.000000       0.263960       0.305000   -9999.000000       0.143800       0.489000
57102     57102     gansu          105.7200       33.7600          105       143     2012      05        26        147              0.273625      16.835205       2.560919       0.256139       0.258500   -9999.000000       0.142800   -9999.000000
57102     57102     gansu          105.7200       33.7600          105       143     2012      05        27        148              0.271542      18.690338       0.865298       0.255384       0.257500       0.174800   -9999.000000   -9999.000000
57102     57102     gansu          105.7200       33.7600          105       143     2012      05        28        149              0.284167      19.106354      17.990393       0.256934       0.325000   -9999.000000   -9999.000000       0.839000
57102     57102     gansu          105.7200       33.7600          105       143     2012      05        29        150              0.287125      16.761200       0.000000       0.297597   -9999.000000   -9999.000000       0.141300   -9999.000000
57102     57102     gansu          105.7200       33.7600          105       143     2012      05        30        151              0.276292      19.365753       0.221744       0.279824       0.239000   -9999.000000       0.140400   -9999.000000
57102     57102     gansu          105.7200       33.7600          105       143     2012      05        31        152              0.266000      20.160187       4.444759       0.265799       0.273000   -9999.000000       0.150200   -9999.000000
57102     57102     gansu          105.7200       33.7600          105       143     2012      06        01        153              0.264750      16.933990       0.000000       0.275896       0.213500   -9999.000000       0.137900       0.768000
57102     57102     gansu          105.7200       33.7600          105       143     2012      06        02        154              0.256542      19.496063       0.496768       0.264746       0.221000   -9999.000000   -9999.000000       0.788000
57102     57102     gansu          105.7200       33.7600          105       143     2012      06        03        155              0.252042      17.865479       0.000000       0.260541       0.239000   -9999.000000   -9999.000000   -9999.000000
57102     57102     gansu          105.7200       33.7600          105       143     2012      06        04        156              0.247792      17.945435       5.310608       0.256853       0.242000       0.041000       0.137500       0.583000
57102     57102     gansu          105.7200       33.7600          105       143     2012      06        05        157              0.286750      18.351501      10.958439       0.259563       0.269000   -9999.000000       0.147900   -9999.000000
57102     57102     gansu          105.7200       33.7600          105       143     2012      06        06        158              0.287125      16.875610       0.295868       0.300181       0.212000   -9999.000000       0.140400       0.833000
57102     57102     gansu          105.7200       33.7600          105       143     2012      06        07        159              0.279708      19.662415       0.527521       0.275448       0.253000       0.014100   -9999.000000       0.657000
57102     57102     gansu          105.7200       33.7600          105       143     2012      06        08        160              0.273167      21.244385       0.532913       0.264260   -9999.000000   -9999.000000   -9999.000000       0.656000
57102     57102     gansu          105.7200       33.7600          105       143     2012      06        09        161              0.272625      19.642456       0.000000       0.260799       0.203000       0.132300       0.134600       0.569000
57102     57102     gansu          105.7200       33.7600          105       143     2012      06        10        162              0.262292      21.755829       1.116276       0.251248       0.245000   -9999.000000       0.142400   -9999.000000
57102     57102     gansu          105.7200       33.7600          105       143     2012      06        11        163              0.000000      20.960419       7.821711       0.251377       0.251000   -9999.000000       0.225000       0.709000
57102     57102     gansu          105.7200       33.7600          105       143     2012      06        12        164              0.248375      20.664154       0.000000       0.275941       0.208500   -9999.000000       0.243700   -9999.000000
57102     57102     gansu          105.7200       33.7600          105       143     2012      06        13        165              0.243667      21.994873       0.174046       0.259264       0.222000   -9999.000000   -9999.000000       0.651000
57102     57102     gansu          105.7200       33.7600          105       143     2012      06        14        166              0.242208      22.170776       0.000000       0.250051   -9999.000000       0.081600       0.250400       0.563000
57102     57102     gansu          105.7200       33.7600          105       143     2012      06        15        167              0.235292      22.302338       0.104559       0.239187       0.252000   -9999.000000       0.231100   -9999.000000
57102     57102     gansu          105.7200       33.7600          105       143     2012      06        16        168              0.234417      20.413422       0.756742       0.235460       0.214500   -9999.000000       0.261200       0.637000
57102     57102     gansu          105.7200       33.7600          105       143     2012      06        17        169              0.228542      21.311310       0.000000       0.227984       0.210000   -9999.000000       0.258000   -9999.000000
57102     57102     gansu          105.7200       33.7600          105       143     2012      06        18        170              0.232478      18.448761       1.277738       0.228331       0.175000   -9999.000000       0.235500       0.561000
57102     57102     gansu          105.7200       33.7600          105       143     2012      06        19        171              0.231792      21.786102       1.061408       0.227930   -9999.000000   -9999.000000   -9999.000000   -9999.000000
57102     57102     gansu          105.7200       33.7600          105       143     2012      06        20        172              0.229750      23.619049       0.000000       0.226493       0.257000   -9999.000000       0.246600   -9999.000000
57102     57102     gansu          105.7200       33.7600          105       143     2012      06        21        173              0.226208      23.669586       0.000000       0.218709       0.192500   -9999.000000       0.250800       0.599000
57102     57102     gansu          105.7200       33.7600          105       143     2012      06        22        174              0.223522      22.732239       0.000000       0.210676       0.182500       0.047500       0.228700   -9999.000000
57102     57102     gansu          105.7200       33.7600          105       143     2012      06        23        175              0.219583      23.182007       0.125921       0.202532       0.144000   -9999.000000       0.235300       0.562000
57102     57102     gansu          105.7200       33.7600          105       143     2012      06        24        176              0.218083      22.516541       8.798630       0.196279       0.174000   -9999.000000   -9999.000000   -9999.000000
57102     57102     gansu          105.7200       33.7600          105       143     2012      06        25        177              0.218292      22.351318       4.018867       0.229667       0.253000       0.041700   -9999.000000   -9999.000000
57102     57102     gansu          105.7200       33.7600          105       143     2012      06        26        178              0.231417      21.183472      16.734138       0.260902   -9999.000000   -9999.000000       0.159900       0.985000
57102     57102     gansu          105.7200       33.7600          105       143     2012      06        27        179              0.292125      20.498474       8.983631       0.279005       0.274000       0.211400       0.153700   -9999.000000
57102     57102     gansu          105.7200       33.7600          105       143     2012      06        28        180              0.296375      20.002991      27.457527       0.303455       0.267000   -9999.000000       0.144500       1.000000
57102     57102     gansu          105.7200       33.7600          105       143     2012      06        29        181              0.300292      20.204254       6.944310       0.311365       0.269000   -9999.000000       0.138600   -9999.000000
57102     57102     gansu          105.7200       33.7600          105       143     2012      06        30        182              0.291750      20.372009       0.545332       0.315767   -9999.000000       0.172200   -9999.000000   -9999.000000
57102     57102     gansu          105.7200       33.7600          105       143     2012      07        01        183              0.284333      22.126068       1.946211       0.290381       0.288000   -9999.000000       0.148600       0.898000
57102     57102     gansu          105.7200       33.7600          105       143     2012      07        02        184              0.296708      21.035065       4.396931       0.285608       0.252500       0.078800       0.295200   -9999.000000
57102     57102     gansu          105.7200       33.7600          105       143     2012      07        03        185              0.296292      21.108704       1.370238       0.294025       0.194000   -9999.000000       0.298600       0.772000
57102     57102     gansu          105.7200       33.7600          105       143     2012      07        04        186              0.287583      23.140076       0.279846       0.279630       0.219000   -9999.000000       0.292200   -9999.000000
57102     57102     gansu          105.7200       33.7600          105       143     2012      07        05        187              0.278333      22.967773       0.000000       0.273665   -9999.000000   -9999.000000       0.282700       0.794000
57102     57102     gansu          105.7200       33.7600          105       143     2012      07        06        188              0.263417      24.414551       2.882686       0.262958   -9999.000000   -9999.000000   -9999.000000       0.868000
57102     57102     gansu          105.7200       33.7600          105       143     2012      07        07        189              0.255125      22.175293       2.168024       0.269326   -9999.000000   -9999.000000       0.329300       0.819000
57102     57102     gansu          105.7200       33.7600          105       143     2012      07        08        190              0.288917      22.959686      13.209934       0.267248       0.251000   -9999.000000       0.327300       0.958000
57102     57102     gansu          105.7200       33.7600          105       143     2012      07        09        191              0.294500      21.009064       1.340202       0.302799       0.257000   -9999.000000       0.359200   -9999.000000
57102     57102     gansu          105.7200       33.7600          105       143     2012      07        10        192              0.290083      21.154755       0.000000       0.288522       0.197000   -9999.000000       0.330600       0.717000
57102     57102     gansu          105.7200       33.7600          105       143     2012      07        11        193              0.280042      24.651306       0.197715       0.271945       0.285000   -9999.000000   -9999.000000   -9999.000000
57102     57102     gansu          105.7200       33.7600          105       143     2012      07        12        194              0.268292      22.786469       0.182352       0.266290       0.221000   -9999.000000   -9999.000000       0.803000
57102     57102     gansu          105.7200       33.7600          105       143     2012      07        13        195              0.258333      23.975098      13.736805       0.259791       0.238500       0.074500       0.339000       0.667000
57102     57102     gansu          105.7200       33.7600          105       143     2012      07        14        196              0.263292      24.125427       0.097734       0.282974       0.267500   -9999.000000       0.357200   -9999.000000
57102     57102     gansu          105.7200       33.7600          105       143     2012      07        15        197              0.253333      24.406799       0.000000       0.280608       0.236000       0.053100       0.336800       0.727000
57102     57102     gansu          105.7200       33.7600          105       143     2012      07        16        198              0.255333      24.188934      10.055536       0.266707   -9999.000000   -9999.000000       0.134200   -9999.000000
57102     57102     gansu          105.7200       33.7600          105       143     2012      07        17        199              0.280125      23.131653       4.864108       0.283144       0.313000   -9999.000000   -9999.000000       0.885000
57102     57102     gansu          105.7200       33.7600          105       143     2012      07        18        200              0.281875      21.511505       3.433536       0.295534       0.291000       0.056500       0.157400   -9999.000000
57102     57102     gansu          105.7200       33.7600          105       143     2012      07        19        201              0.284667      22.448639       2.976088       0.284363       0.325000   -9999.000000       0.146700   -9999.000000
57102     57102     gansu          105.7200       33.7600          105       143     2012      07        20        202              0.292917      21.674896       5.928093       0.287718       0.286000       0.066900       0.146900       0.911000
57102     57102     gansu          105.7200       33.7600          105       143     2012      07        21        203              0.308273      22.174927      17.297670       0.289451   -9999.000000   -9999.000000       0.146700   -9999.000000
57102     57102     gansu          105.7200       33.7600          105       143     2012      07        22        204              0.296125      21.713806       2.294276       0.318226   -9999.000000   -9999.000000   -9999.000000       0.777000
57102     57102     gansu          105.7200       33.7600          105       143     2012      07        23        205              0.299833      23.297028       6.017451       0.290694       0.296000   -9999.000000   -9999.000000   -9999.000000
57102     57102     gansu          105.7200       33.7600          105       143     2012      07        24        206              0.304583      20.605774       0.430036       0.298060       0.340000   -9999.000000       0.115900   -9999.000000
57102     57102     gansu          105.7200       33.7600          105       143     2012      07        25        207              0.298375      20.695160       0.153514       0.291105       0.267000   -9999.000000       0.120300       0.813000
57102     57102     gansu          105.7200       33.7600          105       143     2012      07        26        208              0.290625      23.037994       0.000000       0.279934       0.316000   -9999.000000       0.112000   -9999.000000
57102     57102     gansu          105.7200       33.7600          105       143     2012      07        27        209              0.282042      22.915894       0.050164       0.273899       0.303000   -9999.000000       0.110000       0.782000
57102     57102     gansu          105.7200       33.7600          105       143     2012      07        28        210              0.271500      23.001678       0.000000       0.269345       0.286000       0.057700   -9999.000000   -9999.000000
57102     57102     gansu          105.7200       33.7600          105       143     2012      07        29        211              0.259000      23.873627       0.000000       0.264563       0.263500   -9999.000000   -9999.000000       0.762000
57102     57102     gansu          105.7200       33.7600          105       143     2012      07        30        212              0.250208      24.083954       0.885113       0.259599       0.284000   -9999.000000       0.138600       0.785000
57102     57102     gansu          105.7200       33.7600          105       143     2012      07        31        213              0.244125      22.432648       0.239636       0.261316       0.310000       0.048000       0.146200   -9999.000000
57102     57102     gansu          105.7200       33.7600          105       143     2012      08        01        214              0.239708      21.744385       0.815052       0.257571   -9999.000000   -9999.000000       0.139100       0.735000
57102     57102     gansu          105.7200       33.7600          105       143     2012      08        02        215              0.234625      20.996704       1.876637       0.259227       0.265000       0.205000       0.132900   -9999.000000
57102     57102     gansu          105.7200       33.7600          105       143     2012      08        03        216              0.227917      24.183289       0.434874       0.249898       0.248500   -9999.000000   -9999.000000       0.830000
57102     57102     gansu          105.7200       33.7600          105       143     2012      08        04        217              0.220917      23.972321       0.070923       0.245257       0.224500   -9999.000000       0.141600       0.689000
57102     57102     gansu          105.7200       33.7600          105       143     2012      08        05        218              0.214958      25.109863       0.477240       0.238345       0.257000   -9999.000000       0.138600       0.740000
57102     57102     gansu          105.7200       33.7600          105       143     2012      08        06        219              0.210500      25.257385       1.983717       0.234257       0.250000   -9999.000000       0.190000       0.715000
57102     57102     gansu          105.7200       33.7600          105       143     2012      08        07        220              0.205833      24.473541       0.000000       0.241298       0.245000   -9999.000000       0.177800   -9999.000000
57102     57102     gansu          105.7200       33.7600          105       143     2012      08        08        221              0.199792      24.790497       1.187780       0.234455       0.268000   -9999.000000   -9999.000000       0.706000
57102     57102     gansu          105.7200       33.7600          105       143     2012      08        09        222              0.193917      25.559814       0.252807       0.225444       0.214000   -9999.000000   -9999.000000   -9999.000000
57102     57102     gansu          105.7200       33.7600          105       143     2012      08        10        223              0.188458      26.177887       0.000000       0.217010       0.231000       0.058500       0.184700       0.687000
57102     57102     gansu          105.7200       33.7600          105       143     2012      08        11        224              0.183250      26.356934       0.221014       0.207750       0.227000   -9999.000000       0.190400       0.645000
57102     57102     gansu          105.7200       33.7600          105       143     2012      08        12        225              0.183958      25.115509       4.550466       0.205830   -9999.000000   -9999.000000       0.183300   -9999.000000
57102     57102     gansu          105.7200       33.7600          105       143     2012      08        13        226              0.203783      26.244232      20.341969       0.218214   -9999.000000   -9999.000000       0.179000       0.844000
57102     57102     gansu          105.7200       33.7600          105       143     2012      08        14        227              0.264000      25.886505       0.057914       0.265281       0.269000   -9999.000000   -9999.000000   -9999.000000
57102     57102     gansu          105.7200       33.7600          105       143     2012      08        15        228              0.249417      24.576721       0.892850       0.281546       0.255500       0.084600       0.211000       0.704000
57102     57102     gansu          105.7200       33.7600          105       143     2012      08        16        229              0.237208      25.266205       4.900331       0.259527       0.214000   -9999.000000       0.193200   -9999.000000
57102     57102     gansu          105.7200       33.7600          105       143     2012      08        17        230              0.301609      23.655182      39.170692       0.264889   -9999.000000   -9999.000000       0.214500   -9999.000000
57102     57102     gansu          105.7200       33.7600          105       143     2012      08        18        231              0.299417      22.043274      14.068612       0.333899   -9999.000000       0.047100       0.204700       1.000000
57102     57102     gansu          105.7200       33.7600          105       143     2012      08        19        232              0.301208      20.714020       1.953803       0.318464       0.281500   -9999.000000       0.195900   -9999.000000
57102     57102     gansu          105.7200       33.7600          105       143     2012      08        20        233              0.293250      20.880981       0.174874       0.308810       0.268000       0.138400   -9999.000000       0.785000
57102     57102     gansu          105.7200       33.7600          105       143     2012      08        21        234              0.283000      22.354675       2.412138       0.290873       0.251000   -9999.000000       0.169900   -9999.000000
57102     57102     gansu          105.7200       33.7600          105       143     2012      08        22        235              0.268792      22.315552       0.000000       0.288001       0.262000   -9999.000000       0.171800   -9999.000000
57102     57102     gansu          105.7200       33.7600          105       143     2012      08        23        236              0.255458      21.905609       0.000000       0.278274       0.211000   -9999.000000       0.171900       0.734000
57102     57102     gansu          105.7200       33.7600          105       143     2012      08        24        237              0.248583      20.473969       0.000000       0.274159   -9999.000000   -9999.000000       0.162800   -9999.000000
57102     57102     gansu          105.7200       33.7600          105       143     2012      08        25        238              0.000000      20.375977       0.651052       0.271333       0.255000   -9999.000000   -9999.000000       0.712000
57102     57102     gansu          105.7200       33.7600          105       143     2012      08        26        239              0.239583      21.720428       0.000000       0.266986       0.232000   -9999.000000   -9999.000000   -9999.000000
57102     57102     gansu          105.7200       33.7600          105       143     2012      08        27        240              0.235667      22.484711       1.532221       0.261957   -9999.000000   -9999.000000       0.162900       0.742000
57102     57102     gansu          105.7200       33.7600          105       143     2012      08        28        241              0.232458      21.655853       0.000000       0.264941   -9999.000000   -9999.000000       0.164600       0.685000
57102     57102     gansu          105.7200       33.7600          105       143     2012      08        29        242              0.228125      22.900330       0.210218       0.256416       0.247000   -9999.000000       0.145700   -9999.000000
57102     57102     gansu          105.7200       33.7600          105       143     2012      08        30        243              0.234542      22.562775      19.497694       0.251616       0.314000   -9999.000000       0.174400       1.000000
57102     57102     gansu          105.7200       33.7600          105       143     2012      08        31        244              0.301250      21.516602       7.328878       0.292197       0.288000   -9999.000000   -9999.000000   -9999.000000
57102     57102     gansu          105.7200       33.7600          105       143     2012      09        01        245              0.302417      20.504608       3.897903       0.303595   -9999.000000   -9999.000000       0.176200       0.898000
57102     57102     gansu          105.7200       33.7600          105       143     2012      09        02        246              0.294042      18.268646       0.000000       0.301705       0.174000       0.108700       0.159300       0.743000
57102     57102     gansu          105.7200       33.7600          105       143     2012      09        03        247              0.286250      20.416168       0.000000       0.282591       0.196000   -9999.000000       0.128800       0.787000
57102     57102     gansu          105.7200       33.7600          105       143     2012      09        04        248              0.278250      20.565338       0.000000       0.273627       0.190000   -9999.000000       0.125600       0.675000
57102     57102     gansu          105.7200       33.7600          105       143     2012      09        05        249              0.269833      19.526733       0.000000       0.270309       0.171000       0.033200       0.122700   -9999.000000
57102     57102     gansu          105.7200       33.7600          105       143     2012      09        06        250              0.259000      19.717743       0.139866       0.266761       0.167000   -9999.000000   -9999.000000       0.711000
57102     57102     gansu          105.7200       33.7600          105       143     2012      09        07        251              0.272042      20.423279      14.438234       0.263376   -9999.000000       0.157100       0.132200   -9999.000000
57102     57102     gansu          105.7200       33.7600          105       143     2012      09        08        252              0.287125      19.360138       0.509182       0.297715   -9999.000000   -9999.000000       0.135500       0.867000
57102     57102     gansu          105.7200       33.7600          105       143     2012      09        09        253              0.284750      21.330444       8.426008       0.282718       0.233000   -9999.000000       0.133200       0.893000
57102     57102     gansu          105.7200       33.7600          105       143     2012      09        10        254              0.307583      19.448822      16.100327       0.291865       0.218000       0.216000       0.100500   -9999.000000
57102     57102     gansu          105.7200       33.7600          105       143     2012      09        11        255              0.295833      18.796356       0.678136       0.318280       0.224500   -9999.000000   -9999.000000       0.787000
57102     57102     gansu          105.7200       33.7600          105       143     2012      09        12        256              0.282292      19.300781       0.000000       0.292857       0.238000       0.045600   -9999.000000   -9999.000000
57102     57102     gansu          105.7200       33.7600          105       143     2012      09        13        257              0.267667      16.840393       0.000000       0.283455   -9999.000000   -9999.000000       0.096500       0.550000
57102     57102     gansu          105.7200       33.7600          105       143     2012      09        14        258              0.253625      16.629028       0.000000       0.277244       0.230000   -9999.000000       0.101600   -9999.000000
57102     57102     gansu          105.7200       33.7600          105       143     2012      09        15        259              0.243208      16.681854       4.061942       0.273454       0.249500       0.047700       0.096500   -9999.000000
57102     57102     gansu          105.7200       33.7600          105       143     2012      09        16        260              0.288958      15.343811      14.028798       0.278842       0.225000   -9999.000000       0.098600       0.905000
57102     57102     gansu          105.7200       33.7600          105       143     2012      09        17        261              0.289500      15.149963       0.000000       0.312491       0.246500   -9999.000000   -9999.000000   -9999.000000
57102     57102     gansu          105.7200       33.7600          105       143     2012      09        18        262              0.283833      15.898773       0.000000       0.289782       0.230000   -9999.000000       0.150400       0.663000
57102     57102     gansu          105.7200       33.7600          105       143     2012      09        19        263              0.273391      18.022614       0.000000       0.281051   -9999.000000   -9999.000000       0.140200   -9999.000000
57102     57102     gansu          105.7200       33.7600          105       143     2012      09        20        264              0.261875      17.678314       3.736714       0.275591       0.238000   -9999.000000       0.146700   -9999.000000
57102     57102     gansu          105.7200       33.7600          105       143     2012      09        21        265              0.267958      16.062561       0.000000       0.284206   -9999.000000   -9999.000000       0.141300       0.812000
57102     57102     gansu          105.7200       33.7600          105       143     2012      09        22        266              0.262625      18.236633       0.000000       0.275827       0.138000   -9999.000000       0.141100   -9999.000000
57102     57102     gansu          105.7200       33.7600          105       143     2012      09        23        267              0.256500      17.659576       1.112044       0.271647       0.154000   -9999.000000   -9999.000000       0.753000
57102     57102     gansu          105.7200       33.7600          105       143     2012      09        24        268              0.264125      17.683136      32.745018       0.271378   -9999.000000   -9999.000000       0.143000   -9999.000000
57102     57102     gansu          105.7200       33.7600          105       143     2012      09        25        269              0.296609      16.421204       3.390029       0.310906       0.173000       0.136700       0.137000       0.887000
57102     57102     gansu          105.7200       33.7600          105       143     2012      09        26        270              0.289375      15.842773       0.755827       0.315373       0.151500   -9999.000000       0.130400       0.778000
57102     57102     gansu          105.7200       33.7600          105       143     2012      09        27        271              0.284857      17.337799       0.349061       0.297141       0.158500   -9999.000000       0.128000   -9999.000000
57102     57102     gansu          105.7200       33.7600          105       143     2012      09        28        272              0.264000      17.281281       0.098712       0.287807       0.130000   -9999.000000   -9999.000000       0.633000
57102     57102     gansu          105.7200       33.7600          105       143     2012      09        29        273              0.257208      16.304718       3.053984       0.281378       0.160000   -9999.000000   -9999.000000   -9999.000000
57102     57102     gansu          105.7200       33.7600          105       143     2012      09        30        274              0.256667      17.042389       0.000000       0.284180       0.168000   -9999.000000       0.126400       0.805000
57102     57102     gansu          105.7200       33.7600          105       143     2012      10        01        275              0.252167      16.952576       0.154582       0.279437       0.145000   -9999.000000       0.193600       0.732000
57102     57102     gansu          105.7200       33.7600          105       143     2012      10        02        276              0.286292      15.745728      19.595274       0.276185       0.147000   -9999.000000       0.185800       0.851000
57102     57102     gansu          105.7200       33.7600          105       143     2012      10        03        277              0.289667      15.012299       0.000000       0.314148       0.140000       0.126900       0.184100       0.649000
57102     57102     gansu          105.7200       33.7600          105       143     2012      10        04        278              0.278417      16.912079       0.133492       0.293757       0.176000   -9999.000000   -9999.000000   -9999.000000
57102     57102     gansu          105.7200       33.7600          105       143     2012      10        05        279              0.267917      15.608307       0.294677       0.284467   -9999.000000   -9999.000000       0.188400       0.673000
57102     57102     gansu          105.7200       33.7600          105       143     2012      10        06        280              0.259667      15.656586       1.802878       0.279947       0.162000   -9999.000000       0.196400   -9999.000000
57102     57102     gansu          105.7200       33.7600          105       143     2012      10        07        281              0.256000      13.979950       3.105887       0.282858       0.160500   -9999.000000       0.201900       0.800000
57102     57102     gansu          105.7200       33.7600          105       143     2012      10        08        282              0.258417      13.584686       3.805583       0.288698       0.160000       0.085700       0.131800       0.747000
57102     57102     gansu          105.7200       33.7600          105       143     2012      10        09        283              0.256750      13.953094       0.000000       0.293220       0.151000   -9999.000000   -9999.000000   -9999.000000
57102     57102     gansu          105.7200       33.7600          105       143     2012      10        10        284              0.249250      14.294250       0.182642       0.281153       0.189000   -9999.000000   -9999.000000       0.711000
57102     57102     gansu          105.7200       33.7600          105       143     2012      10        11        285              0.249667      13.951233       5.374931       0.277233       0.116000   -9999.000000       0.134100   -9999.000000
57102     57102     gansu          105.7200       33.7600          105       143     2012      10        12        286              0.260750      12.990997       0.203060       0.290698       0.109000   -9999.000000       0.132300       0.766000
57102     57102     gansu          105.7200       33.7600          105       143     2012      10        13        287              0.263083      13.476624       0.000000       0.283886       0.105000       0.199100       0.125100   -9999.000000
57102     57102     gansu          105.7200       33.7600          105       143     2012      10        14        288              0.257500      14.248535       0.268545       0.277742       0.114500   -9999.000000       0.134200   -9999.000000
57102     57102     gansu          105.7200       33.7600          105       143     2012      10        15        289              0.255333      12.961670       4.857655       0.276503       0.122000   -9999.000000   -9999.000000       0.821000
57102     57102     gansu          105.7200       33.7600          105       143     2012      10        16        290              0.253500      12.460754       0.000000       0.285311   -9999.000000       0.330000       0.159700   -9999.000000
57102     57102     gansu          105.7200       33.7600          105       143     2012      10        17        291              0.248167      12.109497       0.000000       0.281124       0.112000   -9999.000000       0.156100       0.640000
57102     57102     gansu          105.7200       33.7600          105       143     2012      10        18        292              0.242000      12.956299       0.661602       0.274689       0.116500       0.018200       0.154300   -9999.000000
57102     57102     gansu          105.7200       33.7600          105       143     2012      10        19        293              0.240750      11.890900       0.000000       0.275860       0.106500   -9999.000000       0.144200   -9999.000000
57102     57102     gansu          105.7200       33.7600          105       143     2012      10        20        294              0.236750      13.143036       0.000000       0.272927       0.118000   -9999.000000       0.149600       0.728000
57102     57102     gansu          105.7200       33.7600          105       143     2012      10        21        295              0.232250      12.976562       0.964424       0.271555   -9999.000000   -9999.000000   -9999.000000   -9999.000000
57102     57102     gansu          105.7200       33.7600          105       143     2012      10        22        296              0.231542       9.993225       0.203980       0.274046   -9999.000000   -9999.000000       0.163400       0.602000
57102     57102     gansu          105.7200       33.7600          105       143     2012      10        23        297              0.226958      11.539673       0.128426       0.269516   -9999.000000   -9999.000000       0.157900   -9999.000000
57102     57102     gansu          105.7200       33.7600          105       143     2012      10        24        298              0.226458       9.528198       0.000000       0.270023   -9999.000000   -9999.000000       0.145900       0.626000
57102     57102     gansu          105.7200       33.7600          105       143     2012      10        25        299              0.000000      11.074158       4.290029       0.267717       0.130000   -9999.000000       0.159500       0.621000
57102     57102     gansu          105.7200       33.7600          105       143     2012      10        26        300              0.228500      10.132965       0.000000       0.276422       0.163000       0.052900   -9999.000000   -9999.000000
57102     57102     gansu          105.7200       33.7600          105       143     2012      10        27        301              0.229958      12.117950       0.000000       0.276695       0.176000   -9999.000000   -9999.000000       0.640000
57102     57102     gansu          105.7200       33.7600          105       143     2012      10        28        302              0.000000      12.728577       0.542651       0.271067       0.163000   -9999.000000       0.158500   -9999.000000
57102     57102     gansu          105.7200       33.7600          105       143     2012      10        29        303              0.230208      11.725586       0.078938       0.270481       0.154500   -9999.000000       0.140200       0.666000
57102     57102     gansu          105.7200       33.7600          105       143     2012      10        30        304              0.226625      11.459900       0.000000       0.269153       0.156000   -9999.000000       0.130200       0.651000
57102     57102     gansu          105.7200       33.7600          105       143     2012      10        31        305              0.224625      10.723969       0.337004       0.266308       0.171000       0.284000       0.133900       0.628000
57102     57102     gansu          105.7200       33.7600          105       143     2012      11        01        306              0.222917      10.955688       0.591476       0.264879   -9999.000000   -9999.000000   -9999.000000       0.502000
57102     57102     gansu          105.7200       33.7600          105       143     2012      11        02        307              0.221667      10.142792       0.054146       0.266957   -9999.000000   -9999.000000       0.141200   -9999.000000
57102     57102     gansu          105.7200       33.7600          105       143     2012      11        03        308              0.216750       8.886536       0.000000       0.266342       0.138000   -9999.000000       0.128600       0.494000
57102     57102     gansu          105.7200       33.7600          105       143     2012      11        04        309              0.214500       6.104248       0.000000       0.263278       0.127000   -9999.000000       0.140100   -9999.000000
57102     57102     gansu          105.7200       33.7600          105       143     2012      11        05        310              0.213500       7.164856       0.000000       0.262713       0.133000   -9999.000000       0.151900   -9999.000000
57102     57102     gansu          105.7200       33.7600          105       143     2012      11        06        311              0.215083       8.402313       5.445215       0.262241       0.161000   -9999.000000       0.153400       0.575000
57102     57102     gansu          105.7200       33.7600          105       143     2012      11        07        312              0.236917       7.374847       0.229872       0.273383   -9999.000000   -9999.000000   -9999.000000   -9999.000000
57102     57102     gansu          105.7200       33.7600          105       143     2012      11        08        313              0.242667       6.370728       0.177031       0.279975       0.165000       0.105400       0.164500       0.658000
57102     57102     gansu          105.7200       33.7600          105       143     2012      11        09        314              0.243583       7.423370       1.391603       0.273322       0.161000   -9999.000000       0.166100   -9999.000000
57102     57102     gansu          105.7200       33.7600          105       143     2012      11        10        315              0.251833       6.937500       0.000000       0.275990   -9999.000000       0.098300       0.152700       0.425000
57102     57102     gansu          105.7200       33.7600          105       143     2012      11        11        316              0.248667       4.067657       0.160014       0.271833       0.130000   -9999.000000       0.158100   -9999.000000
57102     57102     gansu          105.7200       33.7600          105       143     2012      11        12        317              0.247083       5.834625       0.000000       0.269874   -9999.000000       0.259400   -9999.000000   -9999.000000
57102     57102     gansu          105.7200       33.7600          105       143     2012      11        13        318              0.000000       7.690613       0.000000       0.268854       0.134000       0.107500   -9999.000000       0.619000
57102     57102     gansu          105.7200       33.7600          105       143     2012      11        14        319              0.239667       7.488373       0.874204       0.268772       0.132000   -9999.000000       0.124100   -9999.000000
57102     57102     gansu          105.7200       33.7600          105       143     2012      11        15        320              0.243167       7.066010       0.852260       0.270469       0.135000   -9999.000000       0.121300       0.603000
57102     57102     gansu          105.7200       33.7600          105       143     2012      11        16        321              0.244818       5.541962       0.000000       0.274750       0.134000   -9999.000000       0.111600   -9999.000000
57102     57102     gansu          105.7200       33.7600          105       143     2012      11        17        322              0.000000       6.551575       0.000000       0.269786   -9999.000000   -9999.000000       0.116900   -9999.000000
57102     57102     gansu          105.7200       33.7600          105       143     2012      11        18        323              0.238000       6.885529       0.000000       0.268682       0.138000   -9999.000000   -9999.000000       0.640000
57102     57102     gansu          105.7200       33.7600          105       143     2012      11        19        324              0.231333       7.235443       0.132715       0.267041       0.130500   -9999.000000       0.093900   -9999.000000
57102     57102     gansu          105.7200       33.7600          105       143     2012      11        20        325              0.230333       5.802185       0.000000       0.267201       0.123500   -9999.000000       0.089000       0.550000
57102     57102     gansu          105.7200       33.7600          105       143     2012      11        21        326              0.230333       5.088379       0.000000       0.267993       0.092000       0.052100       0.095000   -9999.000000
57102     57102     gansu          105.7200       33.7600          105       143     2012      11        22        327              0.224667       5.903229       0.000000       0.267507       0.113000   -9999.000000       0.091300       0.583000
57102     57102     gansu          105.7200       33.7600          105       143     2012      11        23        328              0.221583       3.810974       0.000000       0.263142   -9999.000000       0.174700   -9999.000000       0.495000
57102     57102     gansu          105.7200       33.7600          105       143     2012      11        24        329              0.217000       4.203033       0.414927       0.262885   -9999.000000   -9999.000000   -9999.000000   -9999.000000
57102     57102     gansu          105.7200       33.7600          105       143     2012      11        25        330              0.217167       2.392242       0.104313       0.261961   -9999.000000   -9999.000000       0.084600       0.358000
57102     57102     gansu          105.7200       33.7600          105       143     2012      11        26        331              0.216208       2.098663       0.095159       0.247025       0.103000   -9999.000000   -9999.000000   -9999.000000
57102     57102     gansu          105.7200       33.7600          105       143     2012      11        27        332              0.214292       2.330414       0.147600       0.239683       0.123000   -9999.000000       0.089700       0.402000
57102     57102     gansu          105.7200       33.7600          105       143     2012      11        28        333              0.214458       1.766327       0.000000       0.239060   -9999.000000       0.054500       0.095400       0.463000
57102     57102     gansu          105.7200       33.7600          105       143     2012      11        29        334              0.213250       2.922241       0.046651       0.249422   -9999.000000   -9999.000000   -9999.000000       0.458000
57102     57102     gansu          105.7200       33.7600          105       143     2012      11        30        335              0.214375       1.926025       0.090524       0.246915   -9999.000000   -9999.000000   -9999.000000       0.290000
57102     57102     gansu          105.7200       33.7600          105       143     2012      12        01        336              0.216583       1.646271       0.195752       0.247506       0.113000   -9999.000000       0.095000   -9999.000000
57102     57102     gansu          105.7200       33.7600          105       143     2012      12        02        337              0.216083       3.502960       0.000000       0.260220       0.110000   -9999.000000       0.094600       0.452000
57102     57102     gansu          105.7200       33.7600          105       143     2012      12        03        338              0.214708       2.968201       0.000000       0.255877       0.117000   -9999.000000       0.095400   -9999.000000
57102     57102     gansu          105.7200       33.7600          105       143     2012      12        04        339              0.215750       2.195251       0.000000       0.245297   -9999.000000   -9999.000000       0.093300       0.521000
57102     57102     gansu          105.7200       33.7600          105       143     2012      12        05        340              0.213042       3.776764       0.000000       0.251561   -9999.000000   -9999.000000   -9999.000000       0.251000
57102     57102     gansu          105.7200       33.7600          105       143     2012      12        06        341              0.211958       3.285675       0.000000       0.251716       0.108000   -9999.000000       0.098100   -9999.000000
57102     57102     gansu          105.7200       33.7600          105       143     2012      12        07        342              0.210458       3.864014       0.000000       0.255595       0.096000   -9999.000000       0.095400       0.363000
57102     57102     gansu          105.7200       33.7600          105       143     2012      12        08        343              0.210917       3.383911       0.000000       0.246457       0.109000   -9999.000000       0.097600   -9999.000000
57102     57102     gansu          105.7200       33.7600          105       143     2012      12        09        344              0.211833       3.094421       0.000000       0.249745   -9999.000000   -9999.000000       0.098100       0.444000
57102     57102     gansu          105.7200       33.7600          105       143     2012      12        10        345              0.211708       2.914215       0.000000       0.259043   -9999.000000   -9999.000000   -9999.000000   -9999.000000
57102     57102     gansu          105.7200       33.7600          105       143     2012      12        11        346              0.210500       3.715363       0.000000       0.250072       0.112000       0.026700   -9999.000000   -9999.000000
57102     57102     gansu          105.7200       33.7600          105       143     2012      12        12        347              0.212000       2.309845       1.475624       0.254332   -9999.000000   -9999.000000       0.081700       0.653000
57102     57102     gansu          105.7200       33.7600          105       143     2012      12        13        348              0.212000       2.092834       0.017664       0.258111   -9999.000000   -9999.000000       0.081300   -9999.000000
57102     57102     gansu          105.7200       33.7600          105       143     2012      12        14        349              0.211750       2.001007       0.000000       0.254950   -9999.000000   -9999.000000       0.072900       0.309000
57102     57102     gansu          105.7200       33.7600          105       143     2012      12        15        350              0.000000       3.737122       0.000000       0.259740   -9999.000000   -9999.000000       0.080300   -9999.000000
57102     57102     gansu          105.7200       33.7600          105       143     2012      12        16        351              0.208917       2.411163       0.000000       0.254916       0.107000   -9999.000000   -9999.000000   -9999.000000
57102     57102     gansu          105.7200       33.7600          105       143     2012      12        17        352              0.207750       2.061218       0.000000       0.250685   -9999.000000   -9999.000000       0.090900       0.359000
57102     57102     gansu          105.7200       33.7600          105       143     2012      12        18        353              0.208417       1.246063       2.579166       0.231024       0.097000   -9999.000000       0.087200   -9999.000000
57102     57102     gansu          105.7200       33.7600          105       143     2012      12        19        354              0.208000       2.148163       0.000000       0.240079   -9999.000000   -9999.000000       0.095500       0.279000
57102     57102     gansu          105.7200       33.7600          105       143     2012      12        20        355              0.000000       1.358490       0.000000       0.237356   -9999.000000   -9999.000000       0.090400   -9999.000000
57102     57102     gansu          105.7200       33.7600          105       143     2012      12        21        356              0.207000       1.035583       0.000000       0.218632   -9999.000000   -9999.000000       0.086900       0.200000
57102     57102     gansu          105.7200       33.7600          105       143     2012      12        22        357              0.205652       0.376282       0.000000       0.193110   -9999.000000   -9999.000000   -9999.000000       0.189000
57102     57102     gansu          105.7200       33.7600          105       143     2012      12        23        358              0.201500      -0.998779       0.000000       0.160269       0.089000   -9999.000000       0.093200   -9999.000000
57102     57102     gansu          105.7200       33.7600          105       143     2012      12        24        359              0.201111      -0.835571       0.000000       0.149386   -9999.000000   -9999.000000       0.090600       0.095000
57102     57102     gansu          105.7200       33.7600          105       143     2012      12        25        360              0.201167      -1.170135       0.000000       0.140787   -9999.000000   -9999.000000       0.080800   -9999.000000
57102     57102     gansu          105.7200       33.7600          105       143     2012      12        26        361              0.000000      -0.020294       0.000000       0.167024   -9999.000000   -9999.000000       0.086700       0.230000
57102     57102     gansu          105.7200       33.7600          105       143     2012      12        27        362              0.202000      -0.215393       0.000000       0.165112   -9999.000000   -9999.000000   -9999.000000       0.128000
57102     57102     gansu          105.7200       33.7600          105       143     2012      12        28        363              0.000000      -1.185883       0.042741       0.132008   -9999.000000   -9999.000000   -9999.000000       0.117000
57102     57102     gansu          105.7200       33.7600          105       143     2012      12        29        364              0.000000      -2.066132       0.000000       0.135688   -9999.000000   -9999.000000       0.081600       0.039000
57102     57102     gansu          105.7200       33.7600          105       143     2012      12        30        365              0.000000      -4.390869       0.000000       0.115321   -9999.000000   -9999.000000       0.087700   -9999.000000
57102     57102     gansu          105.7200       33.7600          105       143     2012      12        31        366              0.163467      -3.250854       0.000000       0.127013   -9999.000000   -9999.000000       0.064200       0.183000
