# Supplementary material for: Research on Fusing Multisatellite Soil Moisture Data Based on Bayesian Model Averaging
Source: Hindawi journal article supplement (doi:10.1155/2018/9310838), 2018-06-25
Supplement: f1 [file 9310838.f1.zip › 2012_sm00-10cm_daily_ZDB_ZHY_57111_366days_allin.txt]

57111     57111     gansu          106.3000       33.9200          104       145     2012      01        01        001              0.000000   -9999.000000       0.000000   -9999.000000       0.115000   -9999.000000   -9999.000000   -9999.000000
57111     57111     gansu          106.3000       33.9200          104       145     2012      01        02        002              0.209750      -0.175385       0.000000       0.150932       0.125000   -9999.000000   -9999.000000   -9999.000000
57111     57111     gansu          106.3000       33.9200          104       145     2012      01        03        003              0.000000       0.207886       0.000000       0.168608   -9999.000000   -9999.000000       0.065000   -9999.000000
57111     57111     gansu          106.3000       33.9200          104       145     2012      01        04        004              0.199250      -1.696045       0.000000       0.134565   -9999.000000   -9999.000000       0.070100       0.241000
57111     57111     gansu          106.3000       33.9200          104       145     2012      01        05        005              0.202375      -0.790009       0.000000       0.137809   -9999.000000   -9999.000000       0.067100   -9999.000000
57111     57111     gansu          106.3000       33.9200          104       145     2012      01        06        006              0.202364      -0.849335       0.000000       0.131067   -9999.000000   -9999.000000       0.071300       0.122000
57111     57111     gansu          106.3000       33.9200          104       145     2012      01        07        007              0.204565      -0.817566       0.000000       0.130360   -9999.000000   -9999.000000   -9999.000000   -9999.000000
57111     57111     gansu          106.3000       33.9200          104       145     2012      01        08        008              0.000000      -0.405701       0.000000       0.144346   -9999.000000   -9999.000000       0.070200   -9999.000000
57111     57111     gansu          106.3000       33.9200          104       145     2012      01        09        009              0.204375       0.088104       0.000000       0.163407   -9999.000000   -9999.000000   -9999.000000       0.275000
57111     57111     gansu          106.3000       33.9200          104       145     2012      01        10        010              0.202250       0.219971       0.000000       0.166945   -9999.000000   -9999.000000       0.053200   -9999.000000
57111     57111     gansu          106.3000       33.9200          104       145     2012      01        11        011              0.201087      -0.390961       0.000000       0.149139   -9999.000000   -9999.000000       0.056500       0.220000
57111     57111     gansu          106.3000       33.9200          104       145     2012      01        12        012              0.201833       0.189087       0.000000       0.166061   -9999.000000   -9999.000000       0.056400   -9999.000000
57111     57111     gansu          106.3000       33.9200          104       145     2012      01        13        013              0.201458       0.206848       0.087422       0.161685   -9999.000000   -9999.000000   -9999.000000       0.146000
57111     57111     gansu          106.3000       33.9200          104       145     2012      01        14        014              0.200125       0.163025       2.365768       0.165081   -9999.000000   -9999.000000       0.052200       0.309000
57111     57111     gansu          106.3000       33.9200          104       145     2012      01        15        015              0.199130       0.538971       0.000000       0.179699       0.110000   -9999.000000       0.057000   -9999.000000
57111     57111     gansu          106.3000       33.9200          104       145     2012      01        16        016              0.199500      -0.030243       0.000000       0.151165   -9999.000000   -9999.000000       0.044400       0.242000
57111     57111     gansu          106.3000       33.9200          104       145     2012      01        17        017              0.000000       0.075989       0.000000       0.164053       0.111000   -9999.000000       0.048000   -9999.000000
57111     57111     gansu          106.3000       33.9200          104       145     2012      01        18        018              0.197667       0.616943       0.000000       0.184432       0.112000   -9999.000000   -9999.000000       0.209000
57111     57111     gansu          106.3000       33.9200          104       145     2012      01        19        019              0.197583       0.378998       0.000000       0.174488   -9999.000000   -9999.000000   -9999.000000       0.255000
57111     57111     gansu          106.3000       33.9200          104       145     2012      01        20        020              0.196667       0.396088       1.368635       0.177158   -9999.000000   -9999.000000       0.043300       0.175000
57111     57111     gansu          106.3000       33.9200          104       145     2012      01        21        021              0.194708       0.333618       0.000000       0.175602   -9999.000000   -9999.000000       0.042300       0.015000
57111     57111     gansu          106.3000       33.9200          104       145     2012      01        22        022              0.191913      -1.007141       0.000000       0.147146   -9999.000000   -9999.000000       0.042400   -9999.000000
57111     57111     gansu          106.3000       33.9200          104       145     2012      01        23        023              0.188783      -2.447296       0.000000       0.119501   -9999.000000   -9999.000000       0.048200       0.055000
57111     57111     gansu          106.3000       33.9200          104       145     2012      01        24        024              0.179792      -2.822998       0.000000       0.112835   -9999.000000   -9999.000000   -9999.000000   -9999.000000
57111     57111     gansu          106.3000       33.9200          104       145     2012      01        25        025              0.168583      -2.770538       0.000000       0.126398   -9999.000000   -9999.000000       0.047900       0.048000
57111     57111     gansu          106.3000       33.9200          104       145     2012      01        26        026              0.174208      -0.761230       0.000000       0.141480       0.103000   -9999.000000       0.045000       0.041000
57111     57111     gansu          106.3000       33.9200          104       145     2012      01        27        027              0.169500      -1.197174       0.000000       0.142975       0.103000   -9999.000000       0.046300   -9999.000000
57111     57111     gansu          106.3000       33.9200          104       145     2012      01        28        028              0.173875      -0.041962       0.000000       0.162163       0.117000   -9999.000000       0.051100       0.275000
57111     57111     gansu          106.3000       33.9200          104       145     2012      01        29        029              0.176000       0.951874       0.000000       0.185360   -9999.000000   -9999.000000       0.050300   -9999.000000
57111     57111     gansu          106.3000       33.9200          104       145     2012      01        30        030              0.176500       1.062805       0.000000       0.195309   -9999.000000   -9999.000000   -9999.000000       0.358000
57111     57111     gansu          106.3000       33.9200          104       145     2012      01        31        031              0.175708       1.011810       0.000000       0.203273       0.106000   -9999.000000       0.039200   -9999.000000
57111     57111     gansu          106.3000       33.9200          104       145     2012      02        01        032              0.173042       1.509979       0.000000       0.205330       0.110000   -9999.000000       0.038900   -9999.000000
57111     57111     gansu          106.3000       33.9200          104       145     2012      02        02        033              0.171708       1.395294       0.000000       0.207493       0.123000   -9999.000000       0.039300       0.202000
57111     57111     gansu          106.3000       33.9200          104       145     2012      02        03        034              0.170125       0.986694       0.000000       0.190782   -9999.000000   -9999.000000       0.042300   -9999.000000
57111     57111     gansu          106.3000       33.9200          104       145     2012      02        04        035              0.171042       0.403412       0.000000       0.171262   -9999.000000   -9999.000000   -9999.000000       0.295000
57111     57111     gansu          106.3000       33.9200          104       145     2012      02        05        036              0.170500       1.098267       0.103515       0.195947       0.123000   -9999.000000   -9999.000000   -9999.000000
57111     57111     gansu          106.3000       33.9200          104       145     2012      02        06        037              0.168826       2.719727       0.000000       0.223619       0.116000   -9999.000000       0.043900   -9999.000000
57111     57111     gansu          106.3000       33.9200          104       145     2012      02        07        038              0.165833       2.090698       0.000000       0.212080   -9999.000000   -9999.000000       0.045600       0.221000
57111     57111     gansu          106.3000       33.9200          104       145     2012      02        08        039              0.164792       0.063477       0.000000       0.168015       0.115000   -9999.000000       0.045500   -9999.000000
57111     57111     gansu          106.3000       33.9200          104       145     2012      02        09        040              0.163545       0.233856       0.000000       0.172120   -9999.000000   -9999.000000       0.046100       0.050000
57111     57111     gansu          106.3000       33.9200          104       145     2012      02        10        041              0.161375      -0.651306       0.000000       0.149705   -9999.000000   -9999.000000   -9999.000000   -9999.000000
57111     57111     gansu          106.3000       33.9200          104       145     2012      02        11        042              0.160042      -0.647766       0.000000       0.157676   -9999.000000   -9999.000000       0.047100       0.105000
57111     57111     gansu          106.3000       33.9200          104       145     2012      02        12        043              0.161333      -0.113159       0.000000       0.154071   -9999.000000   -9999.000000   -9999.000000       0.317000
57111     57111     gansu          106.3000       33.9200          104       145     2012      02        13        044              0.161167       0.463226       0.000000       0.174607       0.117000   -9999.000000       0.034300   -9999.000000
57111     57111     gansu          106.3000       33.9200          104       145     2012      02        14        045              0.160750       0.429749       0.000000       0.177948   -9999.000000   -9999.000000   -9999.000000       0.322000
57111     57111     gansu          106.3000       33.9200          104       145     2012      02        15        046              0.159958       1.531860       0.000000       0.202325   -9999.000000   -9999.000000       0.036600   -9999.000000
57111     57111     gansu          106.3000       33.9200          104       145     2012      02        16        047              0.158652       1.329681       0.000000       0.207469   -9999.000000   -9999.000000   -9999.000000       0.177000
57111     57111     gansu          106.3000       33.9200          104       145     2012      02        17        048              0.157625       1.124542       0.000000       0.198763   -9999.000000   -9999.000000       0.033500       0.163000
57111     57111     gansu          106.3000       33.9200          104       145     2012      02        18        049              0.158083      -0.051819       0.000000       0.164075   -9999.000000   -9999.000000       0.035500       0.143000
57111     57111     gansu          106.3000       33.9200          104       145     2012      02        19        050              0.159250       0.537598       0.000000       0.179738   -9999.000000   -9999.000000       0.035700       0.228000
57111     57111     gansu          106.3000       33.9200          104       145     2012      02        20        051              0.158792       0.699188       0.000000       0.187405   -9999.000000   -9999.000000       0.051700   -9999.000000
57111     57111     gansu          106.3000       33.9200          104       145     2012      02        21        052              0.159583       1.133209       0.080868       0.199261       0.082500   -9999.000000   -9999.000000       0.445000
57111     57111     gansu          106.3000       33.9200          104       145     2012      02        22        053              0.159875       3.542053       0.000000       0.229891       0.086000   -9999.000000   -9999.000000   -9999.000000
57111     57111     gansu          106.3000       33.9200          104       145     2012      02        23        054              0.157125       4.620728       0.000000       0.240856       0.092000   -9999.000000       0.047900       0.538000
57111     57111     gansu          106.3000       33.9200          104       145     2012      02        24        055              0.156083       2.124359       0.000000       0.234639   -9999.000000   -9999.000000       0.047700       0.156000
57111     57111     gansu          106.3000       33.9200          104       145     2012      02        25        056              0.153250       2.141998       0.000000       0.226836   -9999.000000   -9999.000000       0.047300   -9999.000000
57111     57111     gansu          106.3000       33.9200          104       145     2012      02        26        057              0.153458       0.408051       0.000000       0.185228   -9999.000000   -9999.000000       0.050400       0.409000
57111     57111     gansu          106.3000       33.9200          104       145     2012      02        27        058              0.153458       1.714020       0.000000       0.203696       0.079000   -9999.000000   -9999.000000   -9999.000000
57111     57111     gansu          106.3000       33.9200          104       145     2012      02        28        059              0.153043       2.516418       0.000000       0.227943   -9999.000000   -9999.000000   -9999.000000       0.339000
57111     57111     gansu          106.3000       33.9200          104       145     2012      02        29        060              0.000000   -9999.000000       0.617682   -9999.000000       0.087000   -9999.000000   -9999.000000   -9999.000000
57111     57111     gansu          106.3000       33.9200          104       145     2012      03        01        061              0.154833       1.887146       0.046936       0.231683   -9999.000000   -9999.000000       0.035800   -9999.000000
57111     57111     gansu          106.3000       33.9200          104       145     2012      03        02        062              0.155000       3.278870       1.491776       0.238861       0.117000   -9999.000000       0.039400       0.471000
57111     57111     gansu          106.3000       33.9200          104       145     2012      03        03        063              0.155458       2.478363       0.136556       0.239524       0.114000   -9999.000000   -9999.000000   -9999.000000
57111     57111     gansu          106.3000       33.9200          104       145     2012      03        04        064              0.155375       2.343201       0.061709       0.240878   -9999.000000   -9999.000000   -9999.000000       0.380000
57111     57111     gansu          106.3000       33.9200          104       145     2012      03        05        065              0.154652       2.337708       0.000000       0.239191   -9999.000000   -9999.000000       0.044800   -9999.000000
57111     57111     gansu          106.3000       33.9200          104       145     2012      03        06        066              0.165000       2.379669       0.000000       0.227129   -9999.000000   -9999.000000       0.044700   -9999.000000
57111     57111     gansu          106.3000       33.9200          104       145     2012      03        07        067              0.000000       2.672333       0.508077       0.231769   -9999.000000   -9999.000000       0.045600       0.394000
57111     57111     gansu          106.3000       33.9200          104       145     2012      03        08        068              0.174870       2.425201       0.705378       0.235081   -9999.000000   -9999.000000       0.048500   -9999.000000
57111     57111     gansu          106.3000       33.9200          104       145     2012      03        09        069              0.175227       2.878296       0.000000       0.240938       0.109000   -9999.000000   -9999.000000       0.489000
57111     57111     gansu          106.3000       33.9200          104       145     2012      03        10        070              0.175958       3.983246       0.000000       0.240645       0.121000   -9999.000000   -9999.000000   -9999.000000
57111     57111     gansu          106.3000       33.9200          104       145     2012      03        11        071              0.175250       6.214264       0.000000       0.245241   -9999.000000   -9999.000000       0.045400       0.648000
57111     57111     gansu          106.3000       33.9200          104       145     2012      03        12        072              0.174261       6.507965       0.000000       0.247387       0.089000   -9999.000000       0.051900       0.555000
57111     57111     gansu          106.3000       33.9200          104       145     2012      03        13        073              0.168083       6.821167       0.000000       0.247239       0.088000   -9999.000000       0.051600   -9999.000000
57111     57111     gansu          106.3000       33.9200          104       145     2012      03        14        074              0.165167       9.070251       0.278895       0.244720       0.094000   -9999.000000   -9999.000000       0.480000
57111     57111     gansu          106.3000       33.9200          104       145     2012      03        15        075              0.166000       7.193970       0.321316       0.246240       0.085000   -9999.000000   -9999.000000   -9999.000000
57111     57111     gansu          106.3000       33.9200          104       145     2012      03        16        076              0.168864       6.343018       0.000000       0.248072       0.089000   -9999.000000       0.051000       0.533000
57111     57111     gansu          106.3000       33.9200          104       145     2012      03        17        077              0.170208       9.578125       0.000000       0.244032       0.093000   -9999.000000       0.050700       0.687000
57111     57111     gansu          106.3000       33.9200          104       145     2012      03        18        078              0.174000      11.609528       2.373935       0.240660       0.099000   -9999.000000       0.060400       0.783000
57111     57111     gansu          106.3000       33.9200          104       145     2012      03        19        079              0.183875      13.139893       0.000000       0.245191       0.102000   -9999.000000       0.061500       0.612000
57111     57111     gansu          106.3000       33.9200          104       145     2012      03        20        080              0.183208      11.563019       0.512718       0.246256       0.097000   -9999.000000   -9999.000000   -9999.000000
57111     57111     gansu          106.3000       33.9200          104       145     2012      03        21        081              0.178043       9.374512       0.306068       0.245980       0.141000   -9999.000000   -9999.000000       0.678000
57111     57111     gansu          106.3000       33.9200          104       145     2012      03        22        082              0.174250       6.651367       0.056231       0.249036   -9999.000000   -9999.000000       0.055400   -9999.000000
57111     57111     gansu          106.3000       33.9200          104       145     2012      03        23        083              0.174458       4.536530       0.396882       0.247260   -9999.000000   -9999.000000       0.055400       0.632000
57111     57111     gansu          106.3000       33.9200          104       145     2012      03        24        084              0.174833       7.159698       0.000000       0.240053       0.105500   -9999.000000       0.054900       0.540000
57111     57111     gansu          106.3000       33.9200          104       145     2012      03        25        085              0.000000       9.337402       0.043513       0.239962       0.096500   -9999.000000       0.056400   -9999.000000
57111     57111     gansu          106.3000       33.9200          104       145     2012      03        26        086              0.174125      11.313690       0.327580       0.236894       0.105000   -9999.000000   -9999.000000       0.740000
57111     57111     gansu          106.3000       33.9200          104       145     2012      03        27        087              0.173958      12.596039       1.283588       0.233085   -9999.000000   -9999.000000       0.067700   -9999.000000
57111     57111     gansu          106.3000       33.9200          104       145     2012      03        28        088              0.272375      13.370636       7.752952       0.234876       0.121000   -9999.000000       0.069200       0.760000
57111     57111     gansu          106.3000       33.9200          104       145     2012      03        29        089              0.265750       9.750824       0.100196       0.274976       0.118000   -9999.000000       0.070300   -9999.000000
57111     57111     gansu          106.3000       33.9200          104       145     2012      03        30        090              0.239167      12.641907       0.112274       0.255437       0.104500   -9999.000000       0.066500   -9999.000000
57111     57111     gansu          106.3000       33.9200          104       145     2012      03        31        091              0.226542       9.116699       0.000000       0.249436       0.096000   -9999.000000       0.064600       0.681000
57111     57111     gansu          106.3000       33.9200          104       145     2012      04        01        092              0.217167      11.497009       0.000000       0.243149   -9999.000000   -9999.000000   -9999.000000   -9999.000000
57111     57111     gansu          106.3000       33.9200          104       145     2012      04        02        093              0.205750      12.245819       0.656454       0.242087       0.112000   -9999.000000       0.065800       0.626000
57111     57111     gansu          106.3000       33.9200          104       145     2012      04        03        094              0.198833      12.009247       0.222726       0.240189       0.100500   -9999.000000       0.064300   -9999.000000
57111     57111     gansu          106.3000       33.9200          104       145     2012      04        04        095              0.195167      13.625214       0.000000       0.234292       0.096500   -9999.000000       0.067000   -9999.000000
57111     57111     gansu          106.3000       33.9200          104       145     2012      04        05        096              0.188917      15.089508       0.000000       0.229416       0.086000   -9999.000000       0.066400       0.675000
57111     57111     gansu          106.3000       33.9200          104       145     2012      04        06        097              0.183375      13.655182       0.845541       0.227729       0.110000   -9999.000000   -9999.000000   -9999.000000
57111     57111     gansu          106.3000       33.9200          104       145     2012      04        07        098              0.181667      11.754547       0.000000       0.230039       0.108000   -9999.000000   -9999.000000       0.562000
57111     57111     gansu          106.3000       33.9200          104       145     2012      04        08        099              0.179417      13.876923       0.000000       0.227489       0.107000   -9999.000000       0.064300   -9999.000000
57111     57111     gansu          106.3000       33.9200          104       145     2012      04        09        100              0.174667      15.190155       0.000000       0.224727       0.099500   -9999.000000       0.082500       0.591000
57111     57111     gansu          106.3000       33.9200          104       145     2012      04        10        101              0.175500      12.124268       0.908986       0.226781       0.081000   -9999.000000       0.075000       0.726000
57111     57111     gansu          106.3000       33.9200          104       145     2012      04        11        102              0.173250      16.745483      17.954224       0.224421       0.109000   -9999.000000       0.074200   -9999.000000
57111     57111     gansu          106.3000       33.9200          104       145     2012      04        12        103              0.170458      15.240265       0.898852       0.266749   -9999.000000   -9999.000000   -9999.000000       0.731000
57111     57111     gansu          106.3000       33.9200          104       145     2012      04        13        104              0.172042       9.700409       0.000000       0.276267       0.127000   -9999.000000       0.086000   -9999.000000
57111     57111     gansu          106.3000       33.9200          104       145     2012      04        14        105              0.174375      12.253204       0.451432       0.259328       0.094000   -9999.000000       0.076500       0.657000
57111     57111     gansu          106.3000       33.9200          104       145     2012      04        15        106              0.180667      13.765381       0.078965       0.252366       0.103000   -9999.000000       0.081300       0.697000
57111     57111     gansu          106.3000       33.9200          104       145     2012      04        16        107              0.182792      15.101501       1.858586       0.247951       0.116000   -9999.000000       0.087600       0.882000
57111     57111     gansu          106.3000       33.9200          104       145     2012      04        17        108              0.179167      14.953705       0.000000       0.251814   -9999.000000   -9999.000000       0.095300       0.624000
57111     57111     gansu          106.3000       33.9200          104       145     2012      04        18        109              0.184000      11.881744       3.088379       0.250571       0.125000   -9999.000000   -9999.000000   -9999.000000
57111     57111     gansu          106.3000       33.9200          104       145     2012      04        19        110              0.179917      15.657013       4.137168       0.243576       0.125000   -9999.000000       0.093700       0.612000
57111     57111     gansu          106.3000       33.9200          104       145     2012      04        20        111              0.181667      12.852325       0.000000       0.259824       0.107000   -9999.000000       0.089300   -9999.000000
57111     57111     gansu          106.3000       33.9200          104       145     2012      04        21        112              0.183750      14.533112       0.755649       0.248668       0.138000   -9999.000000       0.083400       0.608000
57111     57111     gansu          106.3000       33.9200          104       145     2012      04        22        113              0.185417      16.488464       0.000000       0.240124       0.140000   -9999.000000   -9999.000000       0.610000
57111     57111     gansu          106.3000       33.9200          104       145     2012      04        23        114              0.178875      17.702728       0.383171       0.234932       0.192000   -9999.000000   -9999.000000   -9999.000000
57111     57111     gansu          106.3000       33.9200          104       145     2012      04        24        115              0.181917      15.944092       0.000000       0.235221       0.166500   -9999.000000   -9999.000000       0.645000
57111     57111     gansu          106.3000       33.9200          104       145     2012      04        25        116              0.000000      15.809204       0.000000       0.228339       0.151000   -9999.000000       0.126500   -9999.000000
57111     57111     gansu          106.3000       33.9200          104       145     2012      04        26        117              0.184208      15.144897       0.000000       0.221845       0.111000   -9999.000000       0.131900       0.603000
57111     57111     gansu          106.3000       33.9200          104       145     2012      04        27        118              0.186000      16.794189       0.000000       0.216685       0.122000   -9999.000000       0.118500   -9999.000000
57111     57111     gansu          106.3000       33.9200          104       145     2012      04        28        119              0.186750      18.135864       0.211654       0.212666       0.168000   -9999.000000       0.121300   -9999.000000
57111     57111     gansu          106.3000       33.9200          104       145     2012      04        29        120              0.186087      18.728577       0.000000       0.209398       0.151000   -9999.000000   -9999.000000       0.678000
57111     57111     gansu          106.3000       33.9200          104       145     2012      04        30        121              0.176417      19.377563       0.216992       0.203578       0.167000   -9999.000000       0.087000   -9999.000000
57111     57111     gansu          106.3000       33.9200          104       145     2012      05        01        122              0.178042      15.357025       0.665156       0.207697       0.219000   -9999.000000       0.078000       0.647000
57111     57111     gansu          106.3000       33.9200          104       145     2012      05        02        123              0.178667      15.542145       2.022853       0.208500       0.246000   -9999.000000       0.084000   -9999.000000
57111     57111     gansu          106.3000       33.9200          104       145     2012      05        03        124              0.186583      14.600616       2.741704       0.221599   -9999.000000   -9999.000000       0.084200   -9999.000000
57111     57111     gansu          106.3000       33.9200          104       145     2012      05        04        125              0.200333      14.759766       0.162887       0.238950       0.226000   -9999.000000       0.077100       0.842000
57111     57111     gansu          106.3000       33.9200          104       145     2012      05        05        126              0.200917      15.949432       1.748514       0.231846       0.199000   -9999.000000   -9999.000000   -9999.000000
57111     57111     gansu          106.3000       33.9200          104       145     2012      05        06        127              0.194500      17.500885       2.590654       0.223317       0.242000   -9999.000000       0.080000       0.893000
57111     57111     gansu          106.3000       33.9200          104       145     2012      05        07        128              0.210292      15.541290       1.333100       0.230237   -9999.000000   -9999.000000       0.178300   -9999.000000
57111     57111     gansu          106.3000       33.9200          104       145     2012      05        08        129              0.214417      17.478912       0.173574       0.239784   -9999.000000   -9999.000000       0.157900       0.856000
57111     57111     gansu          106.3000       33.9200          104       145     2012      05        09        130              0.210833      19.108734       1.280599       0.230171   -9999.000000   -9999.000000       0.156000       0.853000
57111     57111     gansu          106.3000       33.9200          104       145     2012      05        10        131              0.207583      18.842651      15.200509       0.230332       0.202500   -9999.000000   -9999.000000   -9999.000000
57111     57111     gansu          106.3000       33.9200          104       145     2012      05        11        132              0.250917      18.049164       1.480345       0.255669       0.353000   -9999.000000   -9999.000000       0.711000
57111     57111     gansu          106.3000       33.9200          104       145     2012      05        12        133              0.232875      17.860840       0.093248       0.270417       0.363000       0.166900       0.159500   -9999.000000
57111     57111     gansu          106.3000       33.9200          104       145     2012      05        13        134              0.273667      15.452179      11.912989       0.255856   -9999.000000   -9999.000000       0.173600       0.761000
57111     57111     gansu          106.3000       33.9200          104       145     2012      05        14        135              0.281667      12.492126       0.175611       0.285607       0.414000   -9999.000000       0.188200       0.590000
57111     57111     gansu          106.3000       33.9200          104       145     2012      05        15        136              0.268875      14.858856       0.000000       0.266008       0.394000       0.137500       0.189100       0.774000
57111     57111     gansu          106.3000       33.9200          104       145     2012      05        16        137              0.257042      16.093048       0.000000       0.254774       0.334000   -9999.000000   -9999.000000       0.648000
57111     57111     gansu          106.3000       33.9200          104       145     2012      05        17        138              0.247708      16.730591       0.000000       0.247467       0.335000       0.100200       0.197900   -9999.000000
57111     57111     gansu          106.3000       33.9200          104       145     2012      05        18        139              0.241667      17.031708       3.971647       0.240443       0.313000   -9999.000000       0.185000       0.626000
57111     57111     gansu          106.3000       33.9200          104       145     2012      05        19        140              0.239542      18.161774       0.000000       0.248703       0.292000   -9999.000000       0.192400   -9999.000000
57111     57111     gansu          106.3000       33.9200          104       145     2012      05        20        141              0.235125      18.950867       7.394067       0.242303   -9999.000000   -9999.000000       0.199000       0.744000
57111     57111     gansu          106.3000       33.9200          104       145     2012      05        21        142              0.245708      18.165192      14.908481       0.244471   -9999.000000   -9999.000000       0.223000       0.825000
57111     57111     gansu          106.3000       33.9200          104       145     2012      05        22        143              0.299208      15.852844       3.251936       0.295186   -9999.000000   -9999.000000   -9999.000000   -9999.000000
57111     57111     gansu          106.3000       33.9200          104       145     2012      05        23        144              0.287458      14.798553       0.321727       0.288865   -9999.000000   -9999.000000       0.213300       0.666000
57111     57111     gansu          106.3000       33.9200          104       145     2012      05        24        145              0.281750      14.023621       0.289092       0.272310   -9999.000000   -9999.000000       0.229200   -9999.000000
57111     57111     gansu          106.3000       33.9200          104       145     2012      05        25        146              0.000000      14.816162       0.219677       0.264584   -9999.000000   -9999.000000       0.213600       0.561000
57111     57111     gansu          106.3000       33.9200          104       145     2012      05        26        147              0.263792      15.551971       3.084158       0.257988   -9999.000000   -9999.000000       0.209800   -9999.000000
57111     57111     gansu          106.3000       33.9200          104       145     2012      05        27        148              0.255750      17.225159       0.102371       0.256498   -9999.000000   -9999.000000   -9999.000000   -9999.000000
57111     57111     gansu          106.3000       33.9200          104       145     2012      05        28        149              0.278708      17.589203      29.016611       0.258303   -9999.000000   -9999.000000   -9999.000000       0.835000
57111     57111     gansu          106.3000       33.9200          104       145     2012      05        29        150              0.294500      15.475983       0.000000       0.309523   -9999.000000   -9999.000000       0.208300   -9999.000000
57111     57111     gansu          106.3000       33.9200          104       145     2012      05        30        151              0.278917      17.249176       0.257062       0.287246   -9999.000000   -9999.000000       0.213400   -9999.000000
57111     57111     gansu          106.3000       33.9200          104       145     2012      05        31        152              0.258458      18.154114       0.636906       0.272309   -9999.000000   -9999.000000       0.212600   -9999.000000
57111     57111     gansu          106.3000       33.9200          104       145     2012      06        01        153              0.252667      16.100342       0.208455       0.269105       0.405000   -9999.000000       0.206100   -9999.000000
57111     57111     gansu          106.3000       33.9200          104       145     2012      06        02        154              0.237917      17.770721       0.109914       0.261770   -9999.000000       0.077100   -9999.000000       0.775000
57111     57111     gansu          106.3000       33.9200          104       145     2012      06        03        155              0.225792      17.471313       0.040323       0.256856   -9999.000000   -9999.000000   -9999.000000   -9999.000000
57111     57111     gansu          106.3000       33.9200          104       145     2012      06        04        156              0.218333      17.064301       3.191215       0.253936   -9999.000000   -9999.000000       0.161100       0.631000
57111     57111     gansu          106.3000       33.9200          104       145     2012      06        05        157              0.300625      17.701843      12.212626       0.255878   -9999.000000   -9999.000000       0.198000   -9999.000000
57111     57111     gansu          106.3000       33.9200          104       145     2012      06        06        158              0.297917      15.725739       0.000000       0.294544   -9999.000000   -9999.000000       0.188600       0.789000
57111     57111     gansu          106.3000       33.9200          104       145     2012      06        07        159              0.278750      18.060272       0.000000       0.270250       0.396000   -9999.000000   -9999.000000       0.721000
57111     57111     gansu          106.3000       33.9200          104       145     2012      06        08        160              0.252458      19.173340       1.629324       0.260372   -9999.000000   -9999.000000   -9999.000000   -9999.000000
57111     57111     gansu          106.3000       33.9200          104       145     2012      06        09        161              0.228458      17.929626       0.000000       0.261701   -9999.000000   -9999.000000       0.177700       0.746000
57111     57111     gansu          106.3000       33.9200          104       145     2012      06        10        162              0.203750      19.690338       1.598534       0.252105   -9999.000000   -9999.000000       0.188100   -9999.000000
57111     57111     gansu          106.3000       33.9200          104       145     2012      06        11        163              0.000000      19.495361       0.735075       0.252549   -9999.000000   -9999.000000       0.157600       0.763000
57111     57111     gansu          106.3000       33.9200          104       145     2012      06        12        164              0.174333      19.251099       0.410705       0.248703       0.400000   -9999.000000       0.158900       0.664000
57111     57111     gansu          106.3000       33.9200          104       145     2012      06        13        165              0.164333      19.713196       0.149158       0.240548       0.412000   -9999.000000   -9999.000000       0.770000
57111     57111     gansu          106.3000       33.9200          104       145     2012      06        14        166              0.153292      20.506317       0.000000       0.233827   -9999.000000   -9999.000000   -9999.000000       0.589000
57111     57111     gansu          106.3000       33.9200          104       145     2012      06        15        167              0.144208      19.725464       0.000000       0.225193   -9999.000000   -9999.000000       0.153000   -9999.000000
57111     57111     gansu          106.3000       33.9200          104       145     2012      06        16        168              0.139708      19.201874       0.894164       0.219891       0.393000   -9999.000000       0.162700       0.701000
57111     57111     gansu          106.3000       33.9200          104       145     2012      06        17        169              0.135917      19.562317       0.000000       0.219449       0.396000   -9999.000000       0.164500   -9999.000000
57111     57111     gansu          106.3000       33.9200          104       145     2012      06        18        170              0.142696      17.615662       5.014641       0.219143       0.383000   -9999.000000       0.142400       0.867000
57111     57111     gansu          106.3000       33.9200          104       145     2012      06        19        171              0.144833      19.505707       1.515572       0.234244       0.495000   -9999.000000   -9999.000000       0.627000
57111     57111     gansu          106.3000       33.9200          104       145     2012      06        20        172              0.144500      21.026215       3.682175       0.237606   -9999.000000   -9999.000000       0.145400   -9999.000000
57111     57111     gansu          106.3000       33.9200          104       145     2012      06        21        173              0.142917      21.225708       0.000000       0.241513       0.411500   -9999.000000       0.143300       0.701000
57111     57111     gansu          106.3000       33.9200          104       145     2012      06        22        174              0.141583      20.832703       0.462289       0.232540       0.377000   -9999.000000       0.144000   -9999.000000
57111     57111     gansu          106.3000       33.9200          104       145     2012      06        23        175              0.139167      21.496918       0.000000       0.219736       0.376000   -9999.000000       0.143900       0.640000
57111     57111     gansu          106.3000       33.9200          104       145     2012      06        24        176              0.141083      21.763000       8.015617       0.209303       0.434000   -9999.000000   -9999.000000   -9999.000000
57111     57111     gansu          106.3000       33.9200          104       145     2012      06        25        177              0.171667      21.002594       2.523237       0.234740   -9999.000000   -9999.000000   -9999.000000   -9999.000000
57111     57111     gansu          106.3000       33.9200          104       145     2012      06        26        178              0.187583      19.933624       6.160467       0.253401   -9999.000000   -9999.000000       0.224300       0.886000
57111     57111     gansu          106.3000       33.9200          104       145     2012      06        27        179              0.217708      19.477966       1.181679       0.253736   -9999.000000   -9999.000000       0.229200   -9999.000000
57111     57111     gansu          106.3000       33.9200          104       145     2012      06        28        180              0.232333      19.457275      14.325509       0.259018   -9999.000000   -9999.000000       0.221200       1.000000
57111     57111     gansu          106.3000       33.9200          104       145     2012      06        29        181              0.303250      19.511505      14.946243       0.271404   -9999.000000   -9999.000000       0.213800   -9999.000000
57111     57111     gansu          106.3000       33.9200          104       145     2012      06        30        182              0.287042      19.261047       0.000000       0.305224   -9999.000000   -9999.000000   -9999.000000   -9999.000000
57111     57111     gansu          106.3000       33.9200          104       145     2012      07        01        183              0.271750      20.497528       0.410677       0.275341   -9999.000000   -9999.000000       0.228700       0.922000
57111     57111     gansu          106.3000       33.9200          104       145     2012      07        02        184              0.288917      20.238342       3.701315       0.266544       0.433500   -9999.000000       0.224400   -9999.000000
57111     57111     gansu          106.3000       33.9200          104       145     2012      07        03        185              0.290625      19.763397       2.949932       0.275403       0.469000   -9999.000000       0.224200       0.724000
57111     57111     gansu          106.3000       33.9200          104       145     2012      07        04        186              0.283708      21.651276       0.156753       0.264600       0.413000   -9999.000000       0.220900   -9999.000000
57111     57111     gansu          106.3000       33.9200          104       145     2012      07        05        187              0.267250      21.295898       0.000000       0.262458   -9999.000000   -9999.000000       0.216600       0.759000
57111     57111     gansu          106.3000       33.9200          104       145     2012      07        06        188              0.246708      22.104279       3.362422       0.249387   -9999.000000   -9999.000000   -9999.000000       0.751000
57111     57111     gansu          106.3000       33.9200          104       145     2012      07        07        189              0.250833      21.940887       4.751424       0.249365   -9999.000000   -9999.000000       0.239100   -9999.000000
57111     57111     gansu          106.3000       33.9200          104       145     2012      07        08        190              0.312792      21.651642      22.699083       0.261463   -9999.000000   -9999.000000       0.238600       0.958000
57111     57111     gansu          106.3000       33.9200          104       145     2012      07        09        191              0.304250      20.253540       3.908616       0.308299   -9999.000000   -9999.000000       0.240700   -9999.000000
57111     57111     gansu          106.3000       33.9200          104       145     2012      07        10        192              0.297042      19.955566       0.000000       0.294068       0.387000   -9999.000000       0.236500       0.770000
57111     57111     gansu          106.3000       33.9200          104       145     2012      07        11        193              0.278458      22.673706       0.694098       0.273177   -9999.000000   -9999.000000   -9999.000000       0.741000
57111     57111     gansu          106.3000       33.9200          104       145     2012      07        12        194              0.272333      21.575745       0.396474       0.266906   -9999.000000   -9999.000000   -9999.000000       0.831000
57111     57111     gansu          106.3000       33.9200          104       145     2012      07        13        195              0.252417      22.557495       0.778124       0.258987   -9999.000000   -9999.000000       0.237000       0.744000
57111     57111     gansu          106.3000       33.9200          104       145     2012      07        14        196              0.233250      22.592224       0.862828       0.253634   -9999.000000   -9999.000000       0.241100   -9999.000000
57111     57111     gansu          106.3000       33.9200          104       145     2012      07        15        197              0.222917      22.362976       0.111197       0.250067   -9999.000000   -9999.000000       0.227000       0.760000
57111     57111     gansu          106.3000       33.9200          104       145     2012      07        16        198              0.218083      22.868561      11.610838       0.241976   -9999.000000   -9999.000000       0.158300   -9999.000000
57111     57111     gansu          106.3000       33.9200          104       145     2012      07        17        199              0.219375      22.326630       1.409214       0.270144   -9999.000000   -9999.000000   -9999.000000       0.736000
57111     57111     gansu          106.3000       33.9200          104       145     2012      07        18        200              0.218583      20.969604       0.396095       0.273026   -9999.000000       0.151500       0.166800       0.645000
57111     57111     gansu          106.3000       33.9200          104       145     2012      07        19        201              0.214500      21.960754       2.302743       0.258147   -9999.000000   -9999.000000       0.165600   -9999.000000
57111     57111     gansu          106.3000       33.9200          104       145     2012      07        20        202              0.222625      21.298187       6.713527       0.258863   -9999.000000   -9999.000000       0.174400       1.000000
57111     57111     gansu          106.3000       33.9200          104       145     2012      07        21        203              0.310136      21.392609      29.403696       0.271796   -9999.000000   -9999.000000       0.169800   -9999.000000
57111     57111     gansu          106.3000       33.9200          104       145     2012      07        22        204              0.298042      20.372986       1.036970       0.321847   -9999.000000       0.330500       0.156000       0.759000
57111     57111     gansu          106.3000       33.9200          104       145     2012      07        23        205              0.298750      21.528687      16.014133       0.286832   -9999.000000       0.197900   -9999.000000   -9999.000000
57111     57111     gansu          106.3000       33.9200          104       145     2012      07        24        206              0.310167      19.400726       0.949939       0.300121   -9999.000000   -9999.000000       0.125700   -9999.000000
57111     57111     gansu          106.3000       33.9200          104       145     2012      07        25        207              0.304083      20.214539       0.143197       0.296458   -9999.000000       0.158200       0.130400       0.794000
57111     57111     gansu          106.3000       33.9200          104       145     2012      07        26        208              0.305125      21.542847       0.766601       0.281115   -9999.000000       0.131900       0.126300   -9999.000000
57111     57111     gansu          106.3000       33.9200          104       145     2012      07        27        209              0.306583      21.729034       0.247974       0.275440   -9999.000000       0.113300       0.124400       0.809000
57111     57111     gansu          106.3000       33.9200          104       145     2012      07        28        210              0.296708      22.126007       0.544068       0.269123   -9999.000000   -9999.000000   -9999.000000   -9999.000000
57111     57111     gansu          106.3000       33.9200          104       145     2012      07        29        211              0.278417      23.053467       0.000000       0.261482   -9999.000000   -9999.000000   -9999.000000   -9999.000000
57111     57111     gansu          106.3000       33.9200          104       145     2012      07        30        212              0.250333      23.244049       1.049402       0.254887   -9999.000000       0.176300       0.177600       0.761000
57111     57111     gansu          106.3000       33.9200          104       145     2012      07        31        213              0.230292      21.781250       0.514562       0.257497   -9999.000000       0.072500       0.176800   -9999.000000
57111     57111     gansu          106.3000       33.9200          104       145     2012      08        01        214              0.222083      21.119537       2.975459       0.253714   -9999.000000   -9999.000000       0.173800       0.831000
57111     57111     gansu          106.3000       33.9200          104       145     2012      08        02        215              0.229917      20.220062       0.068752       0.263344   -9999.000000       0.033500       0.171300   -9999.000000
57111     57111     gansu          106.3000       33.9200          104       145     2012      08        03        216              0.216542      22.345032       0.348421       0.252529   -9999.000000   -9999.000000   -9999.000000       0.762000
57111     57111     gansu          106.3000       33.9200          104       145     2012      08        04        217              0.209958      22.617310       0.615240       0.246272   -9999.000000       0.223400       0.178600       0.764000
57111     57111     gansu          106.3000       33.9200          104       145     2012      08        05        218              0.206500      23.051605       2.556565       0.241355   -9999.000000   -9999.000000       0.176300   -9999.000000
57111     57111     gansu          106.3000       33.9200          104       145     2012      08        06        219              0.198000      22.842102       1.263971       0.246846   -9999.000000       0.073400       0.203900       0.777000
57111     57111     gansu          106.3000       33.9200          104       145     2012      08        07        220              0.196167      22.645721       0.000000       0.247002   -9999.000000       0.033200       0.200300   -9999.000000
57111     57111     gansu          106.3000       33.9200          104       145     2012      08        08        221              0.190417      23.284027       1.227461       0.237665   -9999.000000   -9999.000000       0.189200       0.755000
57111     57111     gansu          106.3000       33.9200          104       145     2012      08        09        222              0.182542      23.548584       0.337731       0.235140       0.415000   -9999.000000   -9999.000000       0.738000
57111     57111     gansu          106.3000       33.9200          104       145     2012      08        10        223              0.176292      23.650574       0.000000       0.228633       0.434000       0.151200       0.201600       0.797000
57111     57111     gansu          106.3000       33.9200          104       145     2012      08        11        224              0.166417      24.061859       0.000000       0.219147   -9999.000000   -9999.000000       0.205800       0.715000
57111     57111     gansu          106.3000       33.9200          104       145     2012      08        12        225              0.162208      23.285828       0.651120       0.215475   -9999.000000       0.150500       0.193000   -9999.000000
57111     57111     gansu          106.3000       33.9200          104       145     2012      08        13        226              0.204375      23.903503      58.227600       0.213623   -9999.000000       0.132700       0.223700       0.848000
57111     57111     gansu          106.3000       33.9200          104       145     2012      08        14        227              0.325417      23.545563      12.542084       0.267442   -9999.000000       0.164500   -9999.000000   -9999.000000
57111     57111     gansu          106.3000       33.9200          104       145     2012      08        15        228              0.311917      22.227692       0.088348       0.314775   -9999.000000   -9999.000000   -9999.000000       0.768000
57111     57111     gansu          106.3000       33.9200          104       145     2012      08        16        229              0.299500      23.171143       1.000202       0.285086   -9999.000000   -9999.000000       0.212200       0.769000
57111     57111     gansu          106.3000       33.9200          104       145     2012      08        17        230              0.336208      22.326813      52.060230       0.278647   -9999.000000   -9999.000000       0.246700   -9999.000000
57111     57111     gansu          106.3000       33.9200          104       145     2012      08        18        231              0.332208      21.135223       9.763609       0.338111   -9999.000000       0.080800       0.237300       0.871000
57111     57111     gansu          106.3000       33.9200          104       145     2012      08        19        232              0.333042      19.826477      10.580950       0.314689   -9999.000000   -9999.000000       0.233000   -9999.000000
57111     57111     gansu          106.3000       33.9200          104       145     2012      08        20        233              0.321792      19.452454       0.466133       0.312827   -9999.000000       0.109000   -9999.000000       0.779000
57111     57111     gansu          106.3000       33.9200          104       145     2012      08        21        234              0.312125      20.334045       1.258714       0.288780   -9999.000000   -9999.000000       0.195000   -9999.000000
57111     57111     gansu          106.3000       33.9200          104       145     2012      08        22        235              0.298250      20.338867       0.000000       0.278885   -9999.000000   -9999.000000       0.197300   -9999.000000
57111     57111     gansu          106.3000       33.9200          104       145     2012      08        23        236              0.280958      20.375702       2.243951       0.270960   -9999.000000   -9999.000000       0.201500       0.762000
57111     57111     gansu          106.3000       33.9200          104       145     2012      08        24        237              0.263333      19.325928       0.000000       0.272560   -9999.000000       0.154200       0.196000   -9999.000000
57111     57111     gansu          106.3000       33.9200          104       145     2012      08        25        238              0.000000      19.534363       0.000000       0.266748       0.418000   -9999.000000   -9999.000000       0.730000
57111     57111     gansu          106.3000       33.9200          104       145     2012      08        26        239              0.241708      20.287598       0.000000       0.261790       0.422000   -9999.000000   -9999.000000   -9999.000000
57111     57111     gansu          106.3000       33.9200          104       145     2012      08        27        240              0.227000      21.458160       7.523043       0.255428   -9999.000000   -9999.000000       0.193600   -9999.000000
57111     57111     gansu          106.3000       33.9200          104       145     2012      08        28        241              0.217708      20.528229       0.000000       0.285860   -9999.000000       0.067800       0.198100       0.741000
57111     57111     gansu          106.3000       33.9200          104       145     2012      08        29        242              0.207458      20.901123       0.000000       0.260653   -9999.000000   -9999.000000       0.184400   -9999.000000
57111     57111     gansu          106.3000       33.9200          104       145     2012      08        30        243              0.227667      21.103729      21.322361       0.253306   -9999.000000       0.159900       0.211800       0.978000
57111     57111     gansu          106.3000       33.9200          104       145     2012      08        31        244              0.335833      20.534973      30.616880       0.284424   -9999.000000       0.125300   -9999.000000   -9999.000000
57111     57111     gansu          106.3000       33.9200          104       145     2012      09        01        245              0.327708      19.475739      13.148544       0.321276   -9999.000000   -9999.000000       0.213100       0.892000
57111     57111     gansu          106.3000       33.9200          104       145     2012      09        02        246              0.311250      17.534393       0.000000       0.319335       0.344000   -9999.000000       0.192500       0.734000
57111     57111     gansu          106.3000       33.9200          104       145     2012      09        03        247              0.296875      18.420044       0.000000       0.291142       0.379000   -9999.000000       0.254400   -9999.000000
57111     57111     gansu          106.3000       33.9200          104       145     2012      09        04        248              0.283167      18.492096       0.095834       0.280271       0.387000   -9999.000000       0.239200       0.720000
57111     57111     gansu          106.3000       33.9200          104       145     2012      09        05        249              0.265042      18.537323       0.000000       0.275168       0.336500       0.056300       0.242200   -9999.000000
57111     57111     gansu          106.3000       33.9200          104       145     2012      09        06        250              0.249042      18.887451       0.086716       0.270777       0.309500   -9999.000000   -9999.000000       0.719000
57111     57111     gansu          106.3000       33.9200          104       145     2012      09        07        251              0.288333      19.288177      26.588148       0.266721       0.447000       0.168700       0.247100       1.000000
57111     57111     gansu          106.3000       33.9200          104       145     2012      09        08        252              0.312833      18.253693       0.149947       0.307996   -9999.000000   -9999.000000       0.250100       0.867000
57111     57111     gansu          106.3000       33.9200          104       145     2012      09        09        253              0.308625      19.146454      10.274981       0.291478       0.394000       0.420400       0.270700       0.955000
57111     57111     gansu          106.3000       33.9200          104       145     2012      09        10        254              0.326833      18.763763      16.517609       0.291465       0.373000   -9999.000000       0.149800   -9999.000000
57111     57111     gansu          106.3000       33.9200          104       145     2012      09        11        255              0.313792      17.861603       0.168092       0.317826       0.440500       0.087900   -9999.000000       0.782000
57111     57111     gansu          106.3000       33.9200          104       145     2012      09        12        256              0.302250      17.723816       0.198907       0.291260   -9999.000000   -9999.000000   -9999.000000   -9999.000000
57111     57111     gansu          106.3000       33.9200          104       145     2012      09        13        257              0.291292      15.939240       0.000000       0.282188       0.440000   -9999.000000       0.141400       0.625000
57111     57111     gansu          106.3000       33.9200          104       145     2012      09        14        258              0.278750      16.007416       0.000000       0.276433   -9999.000000       0.257900       0.148800       0.601000
57111     57111     gansu          106.3000       33.9200          104       145     2012      09        15        259              0.264792      16.117767       3.169964       0.272760   -9999.000000       0.096600       0.150100   -9999.000000
57111     57111     gansu          106.3000       33.9200          104       145     2012      09        16        260              0.312083      15.231049       4.971612       0.279283   -9999.000000   -9999.000000       0.149900       0.887000
57111     57111     gansu          106.3000       33.9200          104       145     2012      09        17        261              0.309792      15.081390       0.107830       0.289187       0.441000       0.221900   -9999.000000   -9999.000000
57111     57111     gansu          106.3000       33.9200          104       145     2012      09        18        262              0.301667      15.242615       0.120724       0.278343       0.423000       0.092200       0.197100       0.694000
57111     57111     gansu          106.3000       33.9200          104       145     2012      09        19        263              0.294542      16.314423       0.000000       0.272839   -9999.000000   -9999.000000       0.183800   -9999.000000
57111     57111     gansu          106.3000       33.9200          104       145     2012      09        20        264              0.289083      16.980743       4.890729       0.268330   -9999.000000   -9999.000000       0.190400   -9999.000000
57111     57111     gansu          106.3000       33.9200          104       145     2012      09        21        265              0.301000      15.393036       0.180606       0.280777   -9999.000000   -9999.000000       0.192400       0.759000
57111     57111     gansu          106.3000       33.9200          104       145     2012      09        22        266              0.292417      17.004028       0.000000       0.273759       0.208500   -9999.000000       0.188100   -9999.000000
57111     57111     gansu          106.3000       33.9200          104       145     2012      09        23        267              0.280833      16.885468       0.154607       0.269110       0.245000       0.087700   -9999.000000       0.721000
57111     57111     gansu          106.3000       33.9200          104       145     2012      09        24        268              0.277917      17.021240      17.327087       0.266670   -9999.000000   -9999.000000       0.165100   -9999.000000
57111     57111     gansu          106.3000       33.9200          104       145     2012      09        25        269              0.329913      16.049805       8.977084       0.289459       0.271000   -9999.000000       0.163400   -9999.000000
57111     57111     gansu          106.3000       33.9200          104       145     2012      09        26        270              0.326833      15.060059       0.390172       0.308619       0.248500   -9999.000000       0.156200       0.744000
57111     57111     gansu          106.3000       33.9200          104       145     2012      09        27        271              0.322571      16.109406       0.551638       0.287730       0.251500       0.164500       0.159300   -9999.000000
57111     57111     gansu          106.3000       33.9200          104       145     2012      09        28        272              0.298333      16.054657       0.487137       0.279845       0.212000   -9999.000000   -9999.000000       0.633000
57111     57111     gansu          106.3000       33.9200          104       145     2012      09        29        273              0.281292      14.931763       1.265210       0.276410       0.241000   -9999.000000   -9999.000000   -9999.000000
57111     57111     gansu          106.3000       33.9200          104       145     2012      09        30        274              0.271833      15.482086       0.000000       0.274989       0.265000   -9999.000000       0.154400       0.740000
57111     57111     gansu          106.3000       33.9200          104       145     2012      10        01        275              0.259792      15.779297       0.000000       0.271826       0.296000   -9999.000000       0.212300       0.709000
57111     57111     gansu          106.3000       33.9200          104       145     2012      10        02        276              0.311208      15.063782      20.813177       0.270400       0.312000       0.198100       0.205000   -9999.000000
57111     57111     gansu          106.3000       33.9200          104       145     2012      10        03        277              0.327250      14.439362       0.000000       0.308575       0.288500   -9999.000000       0.213000       0.656000
57111     57111     gansu          106.3000       33.9200          104       145     2012      10        04        278              0.315792      15.733734       0.315950       0.289514       0.322000   -9999.000000   -9999.000000   -9999.000000
57111     57111     gansu          106.3000       33.9200          104       145     2012      10        05        279              0.307667      14.707001       0.332517       0.280924   -9999.000000       0.148600       0.218100       0.678000
57111     57111     gansu          106.3000       33.9200          104       145     2012      10        06        280              0.301000      14.953949       0.684286       0.276606       0.351000       0.069800       0.220400       0.690000
57111     57111     gansu          106.3000       33.9200          104       145     2012      10        07        281              0.300500      13.737305       1.310043       0.276114       0.314500       0.236200       0.229400       0.748000
57111     57111     gansu          106.3000       33.9200          104       145     2012      10        08        282              0.320000      13.372803       8.430428       0.278463       0.315500   -9999.000000       0.128400       0.711000
57111     57111     gansu          106.3000       33.9200          104       145     2012      10        09        283              0.323875      13.281616       0.000000       0.295688       0.300000   -9999.000000       0.124700   -9999.000000
57111     57111     gansu          106.3000       33.9200          104       145     2012      10        10        284              0.316292      13.709045       0.104394       0.281587       0.297000       0.164600   -9999.000000       0.670000
57111     57111     gansu          106.3000       33.9200          104       145     2012      10        11        285              0.314000      13.586304       2.702073       0.276801       0.152000   -9999.000000       0.121500   -9999.000000
57111     57111     gansu          106.3000       33.9200          104       145     2012      10        12        286              0.318125      12.909210       0.290503       0.281758       0.155000   -9999.000000       0.130900       0.713000
57111     57111     gansu          106.3000       33.9200          104       145     2012      10        13        287              0.315792      13.126556       0.000000       0.278619       0.150500   -9999.000000       0.120500       0.622000
57111     57111     gansu          106.3000       33.9200          104       145     2012      10        14        288              0.310667      13.400970       0.040036       0.274198       0.158000   -9999.000000       0.134100   -9999.000000
57111     57111     gansu          106.3000       33.9200          104       145     2012      10        15        289              0.308667      12.726807       2.209950       0.273038       0.178000   -9999.000000   -9999.000000       0.777000
57111     57111     gansu          106.3000       33.9200          104       145     2012      10        16        290              0.305917      12.508118       0.000000       0.275957   -9999.000000   -9999.000000   -9999.000000   -9999.000000
57111     57111     gansu          106.3000       33.9200          104       145     2012      10        17        291              0.298667      11.841980       0.000000       0.274399       0.178000   -9999.000000       0.150000       0.707000
57111     57111     gansu          106.3000       33.9200          104       145     2012      10        18        292              0.292500      12.128113       0.970402       0.270795       0.168000   -9999.000000       0.154400   -9999.000000
57111     57111     gansu          106.3000       33.9200          104       145     2012      10        19        293              0.291583      11.120667       0.000000       0.273886       0.160500   -9999.000000       0.144800   -9999.000000
57111     57111     gansu          106.3000       33.9200          104       145     2012      10        20        294              0.283435      12.941925       0.062170       0.270103       0.175000   -9999.000000       0.152100       0.789000
57111     57111     gansu          106.3000       33.9200          104       145     2012      10        21        295              0.282417      12.757965       3.228589       0.269052   -9999.000000   -9999.000000   -9999.000000   -9999.000000
57111     57111     gansu          106.3000       33.9200          104       145     2012      10        22        296              0.287833      10.169769       0.064852       0.278587   -9999.000000   -9999.000000       0.175100       0.654000
57111     57111     gansu          106.3000       33.9200          104       145     2012      10        23        297              0.283000      10.938934       0.708598       0.271274   -9999.000000   -9999.000000       0.169600   -9999.000000
57111     57111     gansu          106.3000       33.9200          104       145     2012      10        24        298              0.283833       9.144897       0.000000       0.272354   -9999.000000   -9999.000000       0.174600   -9999.000000
57111     57111     gansu          106.3000       33.9200          104       145     2012      10        25        299              0.000000      10.610016       1.906065       0.269005       0.209000   -9999.000000       0.179400       0.647000
57111     57111     gansu          106.3000       33.9200          104       145     2012      10        26        300              0.283833       9.725586       0.000000       0.271020       0.245000   -9999.000000   -9999.000000   -9999.000000
57111     57111     gansu          106.3000       33.9200          104       145     2012      10        27        301              0.284083      11.170135       0.000000       0.270778       0.266000   -9999.000000   -9999.000000       0.780000
57111     57111     gansu          106.3000       33.9200          104       145     2012      10        28        302              0.000000      11.342010       0.479370       0.267422   -9999.000000   -9999.000000       0.174200   -9999.000000
57111     57111     gansu          106.3000       33.9200          104       145     2012      10        29        303              0.278333      11.206116       0.168665       0.266900       0.242000   -9999.000000       0.152500       0.714000
57111     57111     gansu          106.3000       33.9200          104       145     2012      10        30        304              0.268208      11.064941       0.000000       0.266466       0.235500   -9999.000000       0.143200       0.685000
57111     57111     gansu          106.3000       33.9200          104       145     2012      10        31        305              0.260167      10.275452       0.000000       0.264189       0.254000   -9999.000000       0.151900   -9999.000000
57111     57111     gansu          106.3000       33.9200          104       145     2012      11        01        306              0.255917      10.155945       4.919761       0.262890   -9999.000000   -9999.000000   -9999.000000       0.613000
57111     57111     gansu          106.3000       33.9200          104       145     2012      11        02        307              0.253333       9.592957       0.303455       0.262689   -9999.000000   -9999.000000       0.154700   -9999.000000
57111     57111     gansu          106.3000       33.9200          104       145     2012      11        03        308              0.247292       9.644653       0.118885       0.262338       0.177000   -9999.000000       0.142900       0.493000
57111     57111     gansu          106.3000       33.9200          104       145     2012      11        04        309              0.242083       7.013580       0.000000       0.261377       0.185500   -9999.000000       0.154800       0.638000
57111     57111     gansu          106.3000       33.9200          104       145     2012      11        05        310              0.241333       7.167328       0.000000       0.260342       0.173000   -9999.000000       0.124500   -9999.000000
57111     57111     gansu          106.3000       33.9200          104       145     2012      11        06        311              0.242625       7.805023       4.701744       0.259581       0.217000   -9999.000000       0.128400       0.679000
57111     57111     gansu          106.3000       33.9200          104       145     2012      11        07        312              0.277375       7.466644       0.472147       0.267050   -9999.000000   -9999.000000   -9999.000000   -9999.000000
57111     57111     gansu          106.3000       33.9200          104       145     2012      11        08        313              0.284500       6.318176       0.000000       0.275354       0.212000   -9999.000000       0.132300       0.668000
57111     57111     gansu          106.3000       33.9200          104       145     2012      11        09        314              0.289417       7.679596       0.384791       0.267980       0.222500   -9999.000000       0.131600   -9999.000000
57111     57111     gansu          106.3000       33.9200          104       145     2012      11        10        315              0.299333       6.776031       0.000000       0.267216       0.213000   -9999.000000       0.124800       0.410000
57111     57111     gansu          106.3000       33.9200          104       145     2012      11        11        316              0.297000       4.932526       0.548210       0.265448       0.170000   -9999.000000       0.132600       0.567000
57111     57111     gansu          106.3000       33.9200          104       145     2012      11        12        317              0.296333       5.885162       0.000000       0.263732   -9999.000000   -9999.000000   -9999.000000   -9999.000000
57111     57111     gansu          106.3000       33.9200          104       145     2012      11        13        318              0.000000       7.088013       0.343657       0.262776       0.174000   -9999.000000   -9999.000000       0.707000
57111     57111     gansu          106.3000       33.9200          104       145     2012      11        14        319              0.290167       7.178223       0.280161       0.263849       0.170000   -9999.000000       0.108300   -9999.000000
57111     57111     gansu          106.3000       33.9200          104       145     2012      11        15        320              0.291667       6.661713       0.561123       0.263232   -9999.000000   -9999.000000       0.107500       0.654000
57111     57111     gansu          106.3000       33.9200          104       145     2012      11        16        321              0.295273       5.335846       0.000000       0.265110       0.169000   -9999.000000       0.103900   -9999.000000
57111     57111     gansu          106.3000       33.9200          104       145     2012      11        17        322              0.000000       5.941895       0.788763       0.262516   -9999.000000   -9999.000000       0.107700   -9999.000000
57111     57111     gansu          106.3000       33.9200          104       145     2012      11        18        323              0.289870       6.121124       0.000000       0.261889       0.168000   -9999.000000   -9999.000000       0.698000
57111     57111     gansu          106.3000       33.9200          104       145     2012      11        19        324              0.287000       6.451080       0.000000       0.260962       0.161000   -9999.000000       0.093400   -9999.000000
57111     57111     gansu          106.3000       33.9200          104       145     2012      11        20        325              0.287000       4.954254       0.000000       0.260689       0.169500   -9999.000000       0.086100       0.636000
57111     57111     gansu          106.3000       33.9200          104       145     2012      11        21        326              0.286167       4.916443       0.000000       0.260899       0.125000   -9999.000000       0.089300   -9999.000000
57111     57111     gansu          106.3000       33.9200          104       145     2012      11        22        327              0.281833       5.946777       0.000000       0.260631       0.147000   -9999.000000       0.089300   -9999.000000
57111     57111     gansu          106.3000       33.9200          104       145     2012      11        23        328              0.278667       4.152649       0.000000       0.259386   -9999.000000   -9999.000000       0.089300       0.592000
57111     57111     gansu          106.3000       33.9200          104       145     2012      11        24        329              0.280417       4.156494       0.963105       0.258654   -9999.000000   -9999.000000   -9999.000000   -9999.000000
57111     57111     gansu          106.3000       33.9200          104       145     2012      11        25        330              0.309333       2.705933       0.238983       0.260150   -9999.000000   -9999.000000       0.079300       0.354000
57111     57111     gansu          106.3000       33.9200          104       145     2012      11        26        331              0.303083       2.062164       0.457303       0.253286       0.129000   -9999.000000   -9999.000000   -9999.000000
57111     57111     gansu          106.3000       33.9200          104       145     2012      11        27        332              0.297833       2.015717       0.036173       0.243803       0.156000   -9999.000000       0.078800       0.309000
57111     57111     gansu          106.3000       33.9200          104       145     2012      11        28        333              0.294583       1.577881       0.000000       0.245409   -9999.000000   -9999.000000       0.083000       0.539000
57111     57111     gansu          106.3000       33.9200          104       145     2012      11        29        334              0.292250       2.471741       0.455880       0.249429   -9999.000000   -9999.000000   -9999.000000   -9999.000000
57111     57111     gansu          106.3000       33.9200          104       145     2012      11        30        335              0.292667       1.683868       0.376463       0.246439   -9999.000000   -9999.000000   -9999.000000       0.429000
57111     57111     gansu          106.3000       33.9200          104       145     2012      12        01        336              0.294750       1.806946       0.088957       0.250892       0.138000   -9999.000000       0.080800   -9999.000000
57111     57111     gansu          106.3000       33.9200          104       145     2012      12        02        337              0.292750       2.780029       0.000000       0.254932       0.138000   -9999.000000       0.079400       0.457000
57111     57111     gansu          106.3000       33.9200          104       145     2012      12        03        338              0.290917       2.431427       0.000000       0.253123       0.134000   -9999.000000       0.076700       0.494000
57111     57111     gansu          106.3000       33.9200          104       145     2012      12        04        339              0.289167       2.079773       0.000000       0.247879   -9999.000000   -9999.000000       0.079500       0.600000
57111     57111     gansu          106.3000       33.9200          104       145     2012      12        05        340              0.285000       3.074127       0.000000       0.250257   -9999.000000   -9999.000000   -9999.000000       0.365000
57111     57111     gansu          106.3000       33.9200          104       145     2012      12        06        341              0.285833       2.650543       0.000000       0.249622       0.132000   -9999.000000       0.075300   -9999.000000
57111     57111     gansu          106.3000       33.9200          104       145     2012      12        07        342              0.286417       3.524323       0.000000       0.253909       0.126000   -9999.000000       0.074200       0.467000
57111     57111     gansu          106.3000       33.9200          104       145     2012      12        08        343              0.283500       3.013092       0.000000       0.248793       0.141000   -9999.000000       0.079400   -9999.000000
57111     57111     gansu          106.3000       33.9200          104       145     2012      12        09        344              0.284583       2.743683       0.000000       0.249925   -9999.000000   -9999.000000       0.082400       0.522000
57111     57111     gansu          106.3000       33.9200          104       145     2012      12        10        345              0.282583       3.007050       0.000000       0.256009   -9999.000000   -9999.000000   -9999.000000       0.414000
57111     57111     gansu          106.3000       33.9200          104       145     2012      12        11        346              0.280000       3.649048       0.000000       0.253219       0.143000   -9999.000000   -9999.000000   -9999.000000
57111     57111     gansu          106.3000       33.9200          104       145     2012      12        12        347              0.281000       1.970276       0.138515       0.253745       0.161500   -9999.000000       0.076200       0.482000
57111     57111     gansu          106.3000       33.9200          104       145     2012      12        13        348              0.277000       2.386353       0.000000       0.257369   -9999.000000   -9999.000000       0.076100   -9999.000000
57111     57111     gansu          106.3000       33.9200          104       145     2012      12        14        349              0.275833       1.641479       0.000000       0.251377   -9999.000000   -9999.000000       0.071400       0.381000
57111     57111     gansu          106.3000       33.9200          104       145     2012      12        15        350              0.000000       3.088928       0.000000       0.251677   -9999.000000   -9999.000000       0.077400   -9999.000000
57111     57111     gansu          106.3000       33.9200          104       145     2012      12        16        351              0.265000       2.274994       0.000000       0.250054       0.145000   -9999.000000   -9999.000000   -9999.000000
57111     57111     gansu          106.3000       33.9200          104       145     2012      12        17        352              0.260417       1.954468       0.000000       0.244401   -9999.000000   -9999.000000       0.074900       0.362000
57111     57111     gansu          106.3000       33.9200          104       145     2012      12        18        353              0.258083       0.825226       0.039878       0.217947       0.130000   -9999.000000       0.073700   -9999.000000
57111     57111     gansu          106.3000       33.9200          104       145     2012      12        19        354              0.257167       1.548767       0.000000       0.232485       0.161000   -9999.000000       0.078000       0.363000
57111     57111     gansu          106.3000       33.9200          104       145     2012      12        20        355              0.000000       1.397339       0.000000       0.237673   -9999.000000   -9999.000000       0.072400   -9999.000000
57111     57111     gansu          106.3000       33.9200          104       145     2012      12        21        356              0.252957       0.831421       0.000000       0.210940   -9999.000000   -9999.000000       0.075300   -9999.000000
57111     57111     gansu          106.3000       33.9200          104       145     2012      12        22        357              0.246625       0.370331       0.000000       0.186505   -9999.000000   -9999.000000   -9999.000000       0.112000
57111     57111     gansu          106.3000       33.9200          104       145     2012      12        23        358              0.235792      -1.281891       0.000000       0.142638   -9999.000000   -9999.000000       0.072600   -9999.000000
57111     57111     gansu          106.3000       33.9200          104       145     2012      12        24        359              0.236579      -0.901459       0.000000       0.133125   -9999.000000   -9999.000000       0.066600       0.137000
57111     57111     gansu          106.3000       33.9200          104       145     2012      12        25        360              0.233458      -0.512329       0.000000       0.139953   -9999.000000   -9999.000000       0.068100   -9999.000000
57111     57111     gansu          106.3000       33.9200          104       145     2012      12        26        361              0.000000      -0.658997       0.000000       0.138045   -9999.000000   -9999.000000       0.070500       0.176000
57111     57111     gansu          106.3000       33.9200          104       145     2012      12        27        362              0.235333      -0.550568       0.000000       0.142595   -9999.000000   -9999.000000   -9999.000000       0.172000
57111     57111     gansu          106.3000       33.9200          104       145     2012      12        28        363              0.000000      -0.985382       0.117058       0.122748   -9999.000000   -9999.000000   -9999.000000   -9999.000000
57111     57111     gansu          106.3000       33.9200          104       145     2012      12        29        364              0.000000      -1.895477       0.000000       0.124439   -9999.000000   -9999.000000       0.063700       0.016000
57111     57111     gansu          106.3000       33.9200          104       145     2012      12        30        365              0.000000      -4.709534       0.000000       0.103432   -9999.000000   -9999.000000       0.065800   -9999.000000
57111     57111     gansu          106.3000       33.9200          104       145     2012      12        31        366              0.175467      -4.004639       0.000000       0.110592   -9999.000000   -9999.000000       0.057800       0.123000
