# Supplementary material for: Research on Fusing Multisatellite Soil Moisture Data Based on Bayesian Model Averaging
Source: Hindawi journal article supplement (doi:10.1155/2018/9310838), 2018-06-25
Supplement: f1 [file 9310838.f1.zip › 2012_sm00-10cm_daily_ZDB_ZHY_57119_366days_allin.txt]

57119     57119     shaanxi        106.7000       33.1667          107       147     2012      01        01        001              0.000000   -9999.000000       0.000000   -9999.000000       0.129500   -9999.000000   -9999.000000   -9999.000000
57119     57119     shaanxi        106.7000       33.1667          107       147     2012      01        02        002              0.308208       0.452942       0.000000       0.182842       0.124000   -9999.000000   -9999.000000   -9999.000000
57119     57119     shaanxi        106.7000       33.1667          107       147     2012      01        03        003              0.000000       1.082123       0.000000       0.209679   -9999.000000   -9999.000000       0.053400   -9999.000000
57119     57119     shaanxi        106.7000       33.1667          107       147     2012      01        04        004              0.299913       0.071808       0.000000       0.184020   -9999.000000   -9999.000000       0.056600       0.070000
57119     57119     shaanxi        106.7000       33.1667          107       147     2012      01        05        005              0.299750       0.172333       0.000000       0.179277   -9999.000000   -9999.000000       0.053400   -9999.000000
57119     57119     shaanxi        106.7000       33.1667          107       147     2012      01        06        006              0.299875      -0.208313       0.000000       0.164395   -9999.000000   -9999.000000       0.054700       0.115000
57119     57119     shaanxi        106.7000       33.1667          107       147     2012      01        07        007              0.300083      -0.379333       0.307198       0.158528   -9999.000000   -9999.000000   -9999.000000   -9999.000000
57119     57119     shaanxi        106.7000       33.1667          107       147     2012      01        08        008              0.000000       0.027496       0.000000       0.174139   -9999.000000   -9999.000000   -9999.000000   -9999.000000
57119     57119     shaanxi        106.7000       33.1667          107       147     2012      01        09        009              0.298708       0.394745       0.000000       0.190497   -9999.000000   -9999.000000   -9999.000000       0.092000
57119     57119     shaanxi        106.7000       33.1667          107       147     2012      01        10        010              0.297333       0.868805       0.000000       0.203636       0.120000   -9999.000000       0.042200   -9999.000000
57119     57119     shaanxi        106.7000       33.1667          107       147     2012      01        11        011              0.295167       0.761139       0.000000       0.201536       0.111000   -9999.000000       0.042500       0.141000
57119     57119     shaanxi        106.7000       33.1667          107       147     2012      01        12        012              0.293167       1.253082       0.000000       0.214902       0.125000   -9999.000000       0.044600   -9999.000000
57119     57119     shaanxi        106.7000       33.1667          107       147     2012      01        13        013              0.291917       1.033173       0.890507       0.213369   -9999.000000   -9999.000000   -9999.000000       0.028000
57119     57119     shaanxi        106.7000       33.1667          107       147     2012      01        14        014              0.299625       1.233734       0.218772       0.220981   -9999.000000   -9999.000000       0.043200       0.090000
57119     57119     shaanxi        106.7000       33.1667          107       147     2012      01        15        015              0.302542       1.151459       0.000000       0.221630   -9999.000000   -9999.000000       0.043600   -9999.000000
57119     57119     shaanxi        106.7000       33.1667          107       147     2012      01        16        016              0.302208       0.934845       0.000000       0.216871   -9999.000000   -9999.000000       0.039500       0.161000
57119     57119     shaanxi        106.7000       33.1667          107       147     2012      01        17        017              0.000000       0.866333       0.000000       0.215386       0.122000   -9999.000000       0.038400   -9999.000000
57119     57119     shaanxi        106.7000       33.1667          107       147     2012      01        18        018              0.299125       2.025177       0.000000       0.233054       0.121000   -9999.000000   -9999.000000       0.023000
57119     57119     shaanxi        106.7000       33.1667          107       147     2012      01        19        019              0.296542       1.716644       0.000000       0.229746   -9999.000000   -9999.000000   -9999.000000       0.056000
57119     57119     shaanxi        106.7000       33.1667          107       147     2012      01        20        020              0.293083       1.300537       1.269487       0.223857   -9999.000000   -9999.000000       0.037600   -9999.000000
57119     57119     shaanxi        106.7000       33.1667          107       147     2012      01        21        021              0.290042       1.299133       1.578578       0.222888   -9999.000000   -9999.000000       0.037900       0.053000
57119     57119     shaanxi        106.7000       33.1667          107       147     2012      01        22        022              0.286458       0.775848       6.706896       0.208820   -9999.000000   -9999.000000       0.036400   -9999.000000
57119     57119     shaanxi        106.7000       33.1667          107       147     2012      01        23        023              0.284167      -0.008545       0.848616       0.181932   -9999.000000   -9999.000000       0.034700       0.020000
57119     57119     shaanxi        106.7000       33.1667          107       147     2012      01        24        024              0.283542      -0.483795       0.000000       0.166045   -9999.000000   -9999.000000   -9999.000000   -9999.000000
57119     57119     shaanxi        106.7000       33.1667          107       147     2012      01        25        025              0.281708      -0.362579       0.000000       0.170216   -9999.000000   -9999.000000   -9999.000000       0.011000
57119     57119     shaanxi        106.7000       33.1667          107       147     2012      01        26        026              0.280958       0.040100       0.000000       0.171576   -9999.000000   -9999.000000       0.033500       0.040000
57119     57119     shaanxi        106.7000       33.1667          107       147     2012      01        27        027              0.279292       0.292572      35.994415       0.185137       0.109000   -9999.000000       0.036300   -9999.000000
57119     57119     shaanxi        106.7000       33.1667          107       147     2012      01        28        028              0.278500       0.724762      23.046953       0.195211       0.101000   -9999.000000       0.035900       0.193000
57119     57119     shaanxi        106.7000       33.1667          107       147     2012      01        29        029              0.276292       1.457825      17.594641       0.214605   -9999.000000   -9999.000000       0.035700   -9999.000000
57119     57119     shaanxi        106.7000       33.1667          107       147     2012      01        30        030              0.274125       1.462952       0.000000       0.218146   -9999.000000   -9999.000000   -9999.000000       0.227000
57119     57119     shaanxi        106.7000       33.1667          107       147     2012      01        31        031              0.272625       2.575775       0.000000       0.235690       0.097000   -9999.000000       0.030100       0.224000
57119     57119     shaanxi        106.7000       33.1667          107       147     2012      02        01        032              0.270667       2.547943      31.346863       0.240172       0.117000   -9999.000000       0.029600   -9999.000000
57119     57119     shaanxi        106.7000       33.1667          107       147     2012      02        02        033              0.267542       3.052032      19.514812       0.244029   -9999.000000   -9999.000000       0.030900       0.003000
57119     57119     shaanxi        106.7000       33.1667          107       147     2012      02        03        034              0.266000       1.582336       0.000000       0.223129       0.132000   -9999.000000       0.031400   -9999.000000
57119     57119     shaanxi        106.7000       33.1667          107       147     2012      02        04        035              0.265583       0.709534       0.000000       0.205149   -9999.000000   -9999.000000   -9999.000000       0.316000
57119     57119     shaanxi        106.7000       33.1667          107       147     2012      02        05        036              0.264625       1.740692       0.000000       0.228604       0.105000   -9999.000000   -9999.000000   -9999.000000
57119     57119     shaanxi        106.7000       33.1667          107       147     2012      02        06        037              0.262833       3.245667      15.117345       0.242454       0.112000   -9999.000000       0.034700   -9999.000000
57119     57119     shaanxi        106.7000       33.1667          107       147     2012      02        07        038              0.260167       3.738831       0.000000       0.239116   -9999.000000   -9999.000000       0.034500       0.242000
57119     57119     shaanxi        106.7000       33.1667          107       147     2012      02        08        039              0.257125       2.317261      47.787415       0.232703       0.119000   -9999.000000       0.034200   -9999.000000
57119     57119     shaanxi        106.7000       33.1667          107       147     2012      02        09        040              0.243333       2.897339      88.644371       0.235547   -9999.000000   -9999.000000       0.034800       0.144000
57119     57119     shaanxi        106.7000       33.1667          107       147     2012      02        10        041              0.255542       1.030579       9.558358       0.212676   -9999.000000   -9999.000000   -9999.000000   -9999.000000
57119     57119     shaanxi        106.7000       33.1667          107       147     2012      02        11        042              0.250417       0.590546       0.000000       0.190738       0.102000   -9999.000000       0.036800       0.034000
57119     57119     shaanxi        106.7000       33.1667          107       147     2012      02        12        043              0.207708       0.972900       0.000000       0.204892   -9999.000000   -9999.000000   -9999.000000       0.202000
57119     57119     shaanxi        106.7000       33.1667          107       147     2012      02        13        044              0.276917       1.696960       0.000000       0.223258   -9999.000000   -9999.000000       0.026000   -9999.000000
57119     57119     shaanxi        106.7000       33.1667          107       147     2012      02        14        045              0.245708       1.549652       0.000000       0.222566   -9999.000000   -9999.000000   -9999.000000       0.192000
57119     57119     shaanxi        106.7000       33.1667          107       147     2012      02        15        046              0.245833       2.208588       0.000000       0.234517   -9999.000000   -9999.000000       0.026600   -9999.000000
57119     57119     shaanxi        106.7000       33.1667          107       147     2012      02        16        047              0.246000       1.891663       0.000000       0.232992   -9999.000000   -9999.000000   -9999.000000       0.012000
57119     57119     shaanxi        106.7000       33.1667          107       147     2012      02        17        048              0.246833       1.763214       0.000000       0.227939   -9999.000000   -9999.000000       0.026800       0.165000
57119     57119     shaanxi        106.7000       33.1667          107       147     2012      02        18        049              0.246583       1.502991       0.000000       0.222634   -9999.000000   -9999.000000       0.026600   -9999.000000
57119     57119     shaanxi        106.7000       33.1667          107       147     2012      02        19        050              0.246000       1.438812       0.000000       0.223762   -9999.000000   -9999.000000       0.026800       0.249000
57119     57119     shaanxi        106.7000       33.1667          107       147     2012      02        20        051              0.245167       1.583038       0.000000       0.229455   -9999.000000   -9999.000000       0.034200   -9999.000000
57119     57119     shaanxi        106.7000       33.1667          107       147     2012      02        21        052              0.243500       2.486572       0.931584       0.235395       0.081500   -9999.000000   -9999.000000       0.322000
57119     57119     shaanxi        106.7000       33.1667          107       147     2012      02        22        053              0.241875       4.426971       0.000000       0.251080       0.081500   -9999.000000   -9999.000000   -9999.000000
57119     57119     shaanxi        106.7000       33.1667          107       147     2012      02        23        054              0.240875       6.227753       1.121176       0.256162       0.090000   -9999.000000       0.034800       0.301000
57119     57119     shaanxi        106.7000       33.1667          107       147     2012      02        24        055              0.240583       3.769470       0.000000       0.256295       0.086000   -9999.000000       0.034800       0.181000
57119     57119     shaanxi        106.7000       33.1667          107       147     2012      02        25        056              0.240125       2.666626       0.000000       0.247633   -9999.000000   -9999.000000       0.033200   -9999.000000
57119     57119     shaanxi        106.7000       33.1667          107       147     2012      02        26        057              0.239500       1.575806       0.170739       0.231193   -9999.000000   -9999.000000       0.032500       0.036000
57119     57119     shaanxi        106.7000       33.1667          107       147     2012      02        27        058              0.188458       1.994965       0.480166       0.226350   -9999.000000   -9999.000000   -9999.000000   -9999.000000
57119     57119     shaanxi        106.7000       33.1667          107       147     2012      02        28        059              0.237000       1.830322       0.393886       0.228710       0.095000   -9999.000000   -9999.000000       0.195000
57119     57119     shaanxi        106.7000       33.1667          107       147     2012      02        29        060              0.000000   -9999.000000       0.237336   -9999.000000       0.087000   -9999.000000   -9999.000000   -9999.000000
57119     57119     shaanxi        106.7000       33.1667          107       147     2012      03        01        061              0.235750       1.916595       0.710085       0.234996   -9999.000000   -9999.000000       0.026700   -9999.000000
57119     57119     shaanxi        106.7000       33.1667          107       147     2012      03        02        062              0.234417       2.882782       0.000000       0.248004   -9999.000000   -9999.000000       0.026400       0.336000
57119     57119     shaanxi        106.7000       33.1667          107       147     2012      03        03        063              0.231958       3.378204       0.000000       0.251006       0.106000   -9999.000000       0.025200   -9999.000000
57119     57119     shaanxi        106.7000       33.1667          107       147     2012      03        04        064              0.230083       2.977264       0.000000       0.247865       0.117000   -9999.000000   -9999.000000       0.273000
57119     57119     shaanxi        106.7000       33.1667          107       147     2012      03        05        065              0.228542       2.408020       0.000000       0.244110       0.118000   -9999.000000       0.038300   -9999.000000
57119     57119     shaanxi        106.7000       33.1667          107       147     2012      03        06        066              0.218208       3.036255       0.000000       0.241351   -9999.000000   -9999.000000       0.039900   -9999.000000
57119     57119     shaanxi        106.7000       33.1667          107       147     2012      03        07        067              0.000000       2.761871       0.561016       0.243686   -9999.000000   -9999.000000       0.036800       0.214000
57119     57119     shaanxi        106.7000       33.1667          107       147     2012      03        08        068              0.225125       3.638458       0.000000       0.249164   -9999.000000   -9999.000000       0.039200   -9999.000000
57119     57119     shaanxi        106.7000       33.1667          107       147     2012      03        09        069              0.222833       2.739197       0.000000       0.245493       0.106000   -9999.000000   -9999.000000       0.376000
57119     57119     shaanxi        106.7000       33.1667          107       147     2012      03        10        070              0.219917       3.294495       0.000000       0.245315       0.116000   -9999.000000   -9999.000000   -9999.000000
57119     57119     shaanxi        106.7000       33.1667          107       147     2012      03        11        071              0.216792       6.635376       1.307489       0.249897   -9999.000000   -9999.000000       0.039100       0.505000
57119     57119     shaanxi        106.7000       33.1667          107       147     2012      03        12        072              0.214833       7.514374       0.000000       0.251935       0.092000   -9999.000000       0.048200       0.459000
57119     57119     shaanxi        106.7000       33.1667          107       147     2012      03        13        073              0.223542       7.463531       0.000000       0.251830       0.090000   -9999.000000       0.045700   -9999.000000
57119     57119     shaanxi        106.7000       33.1667          107       147     2012      03        14        074              0.210167      10.112610       1.004713       0.249477       0.094500   -9999.000000   -9999.000000       0.408000
57119     57119     shaanxi        106.7000       33.1667          107       147     2012      03        15        075              0.210292       7.343018       0.000000       0.253170       0.101000   -9999.000000   -9999.000000   -9999.000000
57119     57119     shaanxi        106.7000       33.1667          107       147     2012      03        16        076              0.192417       6.865997       0.000000       0.254454       0.090000   -9999.000000       0.049500       0.565000
57119     57119     shaanxi        106.7000       33.1667          107       147     2012      03        17        077              0.122667      10.948547       0.000000       0.251034       0.091000   -9999.000000       0.043000       0.563000
57119     57119     shaanxi        106.7000       33.1667          107       147     2012      03        18        078              0.109583      13.003632       0.000000       0.246766       0.091000   -9999.000000       0.049500   -9999.000000
57119     57119     shaanxi        106.7000       33.1667          107       147     2012      03        19        079              0.190583      14.564178       0.147452       0.242579       0.091000   -9999.000000       0.053100       0.515000
57119     57119     shaanxi        106.7000       33.1667          107       147     2012      03        20        080              0.194958      13.202026       0.000000       0.242014       0.100000   -9999.000000   -9999.000000   -9999.000000
57119     57119     shaanxi        106.7000       33.1667          107       147     2012      03        21        081              0.193000      11.566925       0.000000       0.241523       0.126000   -9999.000000   -9999.000000       0.443000
57119     57119     shaanxi        106.7000       33.1667          107       147     2012      03        22        082              0.192833       6.795563       0.568905       0.244377   -9999.000000   -9999.000000       0.051200   -9999.000000
57119     57119     shaanxi        106.7000       33.1667          107       147     2012      03        23        083              0.190542       6.203156       0.000000       0.244623       0.108000   -9999.000000       0.052800       0.476000
57119     57119     shaanxi        106.7000       33.1667          107       147     2012      03        24        084              0.187458       9.008118       0.000000       0.238825       0.104000   -9999.000000       0.049600       0.405000
57119     57119     shaanxi        106.7000       33.1667          107       147     2012      03        25        085              0.000000      11.092529       0.589301       0.236089       0.100000   -9999.000000       0.051500   -9999.000000
57119     57119     shaanxi        106.7000       33.1667          107       147     2012      03        26        086              0.180750      13.196045       0.131848       0.232662       0.110000   -9999.000000   -9999.000000       0.672000
57119     57119     shaanxi        106.7000       33.1667          107       147     2012      03        27        087              0.178500      13.906067       0.467067       0.230709   -9999.000000   -9999.000000   -9999.000000   -9999.000000
57119     57119     shaanxi        106.7000       33.1667          107       147     2012      03        28        088              0.200500      14.383789       1.883010       0.230489       0.106000   -9999.000000       0.066200       0.712000
57119     57119     shaanxi        106.7000       33.1667          107       147     2012      03        29        089              0.208708      10.821106       0.000000       0.246723       0.103000   -9999.000000       0.068600   -9999.000000
57119     57119     shaanxi        106.7000       33.1667          107       147     2012      03        30        090              0.204333      13.768768       0.176713       0.239410       0.102000   -9999.000000       0.065600   -9999.000000
57119     57119     shaanxi        106.7000       33.1667          107       147     2012      03        31        091              0.198917      11.470886       0.000000       0.234385       0.111000   -9999.000000       0.062200       0.517000
57119     57119     shaanxi        106.7000       33.1667          107       147     2012      04        01        092              0.193667      13.712128       0.000000       0.227817       0.108000   -9999.000000   -9999.000000   -9999.000000
57119     57119     shaanxi        106.7000       33.1667          107       147     2012      04        02        093              0.187625      14.139771       0.492638       0.227369       0.106000   -9999.000000       0.056700       0.609000
57119     57119     shaanxi        106.7000       33.1667          107       147     2012      04        03        094              0.182000      14.521454       0.079192       0.221412       0.093000   -9999.000000       0.047400   -9999.000000
57119     57119     shaanxi        106.7000       33.1667          107       147     2012      04        04        095              0.178292      14.348785       0.000000       0.217981       0.088500   -9999.000000       0.055400   -9999.000000
57119     57119     shaanxi        106.7000       33.1667          107       147     2012      04        05        096              0.175667      16.375854       0.210717       0.214834       0.100500   -9999.000000       0.051700       0.588000
57119     57119     shaanxi        106.7000       33.1667          107       147     2012      04        06        097              0.174000      15.595581       0.224469       0.214571       0.098000   -9999.000000   -9999.000000   -9999.000000
57119     57119     shaanxi        106.7000       33.1667          107       147     2012      04        07        098              0.172000      14.201263       0.363530       0.216217   -9999.000000   -9999.000000   -9999.000000       0.580000
57119     57119     shaanxi        106.7000       33.1667          107       147     2012      04        08        099              0.170042      14.891602       0.000000       0.215063       0.098000   -9999.000000       0.051700   -9999.000000
57119     57119     shaanxi        106.7000       33.1667          107       147     2012      04        09        100              0.168417      14.491058       0.000000       0.214305       0.097500   -9999.000000       0.054700       0.457000
57119     57119     shaanxi        106.7000       33.1667          107       147     2012      04        10        101              0.167208      12.446411       0.213116       0.217359       0.094000   -9999.000000       0.049400       0.652000
57119     57119     shaanxi        106.7000       33.1667          107       147     2012      04        11        102              0.165875      17.878418       1.150751       0.211298       0.123000   -9999.000000       0.051800   -9999.000000
57119     57119     shaanxi        106.7000       33.1667          107       147     2012      04        12        103              0.168750      16.980469       0.860100       0.211990   -9999.000000   -9999.000000   -9999.000000       0.457000
57119     57119     shaanxi        106.7000       33.1667          107       147     2012      04        13        104              0.169042      12.238190       0.000000       0.214174       0.141000   -9999.000000   -9999.000000   -9999.000000
57119     57119     shaanxi        106.7000       33.1667          107       147     2012      04        14        105              0.167167      13.925323       7.885313       0.209816       0.125000   -9999.000000       0.050100       0.555000
57119     57119     shaanxi        106.7000       33.1667          107       147     2012      04        15        106              0.165333      15.373749      15.079888       0.208111       0.103000   -9999.000000       0.054700       0.598000
57119     57119     shaanxi        106.7000       33.1667          107       147     2012      04        16        107              0.163609      16.867004       1.396279       0.204367       0.126000   -9999.000000       0.053000       0.714000
57119     57119     shaanxi        106.7000       33.1667          107       147     2012      04        17        108              0.162708      16.506622       0.000000       0.211460   -9999.000000   -9999.000000       0.058200       0.438000
57119     57119     shaanxi        106.7000       33.1667          107       147     2012      04        18        109              0.162583      13.284515       0.000000       0.216228       0.130000   -9999.000000   -9999.000000   -9999.000000
57119     57119     shaanxi        106.7000       33.1667          107       147     2012      04        19        110              0.161917      16.781708       2.027820       0.209181       0.118500   -9999.000000       0.058600       0.503000
57119     57119     shaanxi        106.7000       33.1667          107       147     2012      04        20        111              0.160500      15.837067       0.531611       0.219389       0.126000   -9999.000000       0.055200   -9999.000000
57119     57119     shaanxi        106.7000       33.1667          107       147     2012      04        21        112              0.158750      16.658478       0.388058       0.215206       0.186000   -9999.000000       0.059800       0.760000
57119     57119     shaanxi        106.7000       33.1667          107       147     2012      04        22        113              0.157250      18.950684       0.000000       0.204953       0.168000   -9999.000000   -9999.000000       0.572000
57119     57119     shaanxi        106.7000       33.1667          107       147     2012      04        23        114              0.163208      20.665466       2.059082       0.195492       0.223000   -9999.000000   -9999.000000   -9999.000000
57119     57119     shaanxi        106.7000       33.1667          107       147     2012      04        24        115              0.163792      16.882172       0.000000       0.217422       0.200000   -9999.000000   -9999.000000       0.495000
57119     57119     shaanxi        106.7000       33.1667          107       147     2012      04        25        116              0.000000      18.307983       0.000000       0.199919       0.178000   -9999.000000       0.079700   -9999.000000
57119     57119     shaanxi        106.7000       33.1667          107       147     2012      04        26        117              0.157583      18.163177       0.000000       0.187246       0.187500   -9999.000000       0.081700       0.583000
57119     57119     shaanxi        106.7000       33.1667          107       147     2012      04        27        118              0.155833      19.515198       0.000000       0.179165       0.166000   -9999.000000       0.073400   -9999.000000
57119     57119     shaanxi        106.7000       33.1667          107       147     2012      04        28        119              0.154667      20.987823       0.237946       0.171964   -9999.000000   -9999.000000       0.072800   -9999.000000
57119     57119     shaanxi        106.7000       33.1667          107       147     2012      04        29        120              0.153417      21.959808       0.000000       0.166518       0.200000   -9999.000000   -9999.000000       0.604000
57119     57119     shaanxi        106.7000       33.1667          107       147     2012      04        30        121              0.151458      22.440613       0.447461       0.160375       0.193500   -9999.000000   -9999.000000   -9999.000000
57119     57119     shaanxi        106.7000       33.1667          107       147     2012      05        01        122              0.151000      18.026398       0.382289       0.162443       0.228500   -9999.000000       0.045100       0.674000
57119     57119     shaanxi        106.7000       33.1667          107       147     2012      05        02        123              0.151042      16.368195       0.363263       0.166501       0.249000   -9999.000000       0.049300   -9999.000000
57119     57119     shaanxi        106.7000       33.1667          107       147     2012      05        03        124              0.156708      16.613129       3.146792       0.171122   -9999.000000   -9999.000000       0.049000   -9999.000000
57119     57119     shaanxi        106.7000       33.1667          107       147     2012      05        04        125              0.160708      15.886383       0.394409       0.206891       0.246000   -9999.000000       0.042400       0.647000
57119     57119     shaanxi        106.7000       33.1667          107       147     2012      05        05        126              0.158792      17.748932       0.000000       0.201044       0.220000   -9999.000000   -9999.000000   -9999.000000
57119     57119     shaanxi        106.7000       33.1667          107       147     2012      05        06        127              0.157542      18.034698       0.475701       0.197330       0.234500   -9999.000000       0.047300       0.727000
57119     57119     shaanxi        106.7000       33.1667          107       147     2012      05        07        128              0.157167      17.234314       1.174532       0.196410   -9999.000000       0.042100       0.073200   -9999.000000
57119     57119     shaanxi        106.7000       33.1667          107       147     2012      05        08        129              0.156583      18.390045       0.727847       0.206878   -9999.000000   -9999.000000       0.077600       0.833000
57119     57119     shaanxi        106.7000       33.1667          107       147     2012      05        09        130              0.154458      21.200378       1.214273       0.193897   -9999.000000   -9999.000000       0.071400       0.662000
57119     57119     shaanxi        106.7000       33.1667          107       147     2012      05        10        131              0.165458      20.248627       6.350368       0.189705       0.201000   -9999.000000   -9999.000000   -9999.000000
57119     57119     shaanxi        106.7000       33.1667          107       147     2012      05        11        132              0.185833      20.270630       0.398681       0.198790       0.368000   -9999.000000   -9999.000000       0.846000
57119     57119     shaanxi        106.7000       33.1667          107       147     2012      05        12        133              0.139208      19.331299       0.000000       0.231710       0.357000   -9999.000000       0.074300   -9999.000000
57119     57119     shaanxi        106.7000       33.1667          107       147     2012      05        13        134              0.213000      18.187988       5.564353       0.209300       0.423000   -9999.000000       0.080200       0.660000
57119     57119     shaanxi        106.7000       33.1667          107       147     2012      05        14        135              0.218917      13.793976       0.267658       0.237967       0.394000       0.164200       0.079300       0.613000
57119     57119     shaanxi        106.7000       33.1667          107       147     2012      05        15        136              0.201167      17.644623       0.000000       0.227567       0.412000   -9999.000000       0.077500   -9999.000000
57119     57119     shaanxi        106.7000       33.1667          107       147     2012      05        16        137              0.188292      19.276947       0.000000       0.211636       0.320000   -9999.000000   -9999.000000       0.555000
57119     57119     shaanxi        106.7000       33.1667          107       147     2012      05        17        138              0.164125      20.174103       0.000000       0.200491       0.362500   -9999.000000       0.081400   -9999.000000
57119     57119     shaanxi        106.7000       33.1667          107       147     2012      05        18        139              0.155792      20.006805       0.949926       0.191925       0.337000   -9999.000000       0.074300       0.616000
57119     57119     shaanxi        106.7000       33.1667          107       147     2012      05        19        140              0.174208      21.179169       0.000000       0.182889   -9999.000000       0.199400       0.081400   -9999.000000
57119     57119     shaanxi        106.7000       33.1667          107       147     2012      05        20        141              0.170333      22.638489       0.735157       0.171313   -9999.000000   -9999.000000       0.084300       0.741000
57119     57119     shaanxi        106.7000       33.1667          107       147     2012      05        21        142              0.285833      19.630096      22.856670       0.169812       0.472000   -9999.000000       0.088800       0.894000
57119     57119     shaanxi        106.7000       33.1667          107       147     2012      05        22        143              0.333542      16.162567       4.688617       0.286731       0.477000       0.175600   -9999.000000   -9999.000000
57119     57119     shaanxi        106.7000       33.1667          107       147     2012      05        23        144              0.322167      15.820953       5.636926       0.283129   -9999.000000   -9999.000000       0.083900       0.852000
57119     57119     shaanxi        106.7000       33.1667          107       147     2012      05        24        145              0.350000      15.416199       1.940615       0.272421   -9999.000000       0.182800       0.080400   -9999.000000
57119     57119     shaanxi        106.7000       33.1667          107       147     2012      05        25        146              0.000000      15.273865       0.000000       0.278797   -9999.000000   -9999.000000       0.082300       0.695000
57119     57119     shaanxi        106.7000       33.1667          107       147     2012      05        26        147              0.314375      16.463715       0.877682       0.263195       0.443000   -9999.000000       0.079900   -9999.000000
57119     57119     shaanxi        106.7000       33.1667          107       147     2012      05        27        148              0.309833      19.708588       0.473923       0.253765       0.412000       0.083600   -9999.000000   -9999.000000
57119     57119     shaanxi        106.7000       33.1667          107       147     2012      05        28        149              0.354792      19.679382      17.856165       0.250263   -9999.000000   -9999.000000   -9999.000000       1.000000
57119     57119     shaanxi        106.7000       33.1667          107       147     2012      05        29        150              0.333917      16.869781       0.000000       0.293164   -9999.000000       0.101500       0.078500   -9999.000000
57119     57119     shaanxi        106.7000       33.1667          107       147     2012      05        30        151              0.306750      19.372375       0.000000       0.278321       0.465000   -9999.000000       0.076000   -9999.000000
57119     57119     shaanxi        106.7000       33.1667          107       147     2012      05        31        152              0.294083      20.431824       1.221817       0.261941       0.458000   -9999.000000       0.084300   -9999.000000
57119     57119     shaanxi        106.7000       33.1667          107       147     2012      06        01        153              0.263750      17.401978       0.220221       0.263976       0.377500       0.204200       0.078700   -9999.000000
57119     57119     shaanxi        106.7000       33.1667          107       147     2012      06        02        154              0.238583      20.036713       0.529721       0.252337       0.419000   -9999.000000   -9999.000000       0.820000
57119     57119     shaanxi        106.7000       33.1667          107       147     2012      06        03        155              0.255125      19.302704       0.155376       0.248902       0.426000       0.083200   -9999.000000   -9999.000000
57119     57119     shaanxi        106.7000       33.1667          107       147     2012      06        04        156              0.232087      18.768982       1.631147       0.247181       0.472000   -9999.000000       0.088000       0.645000
57119     57119     shaanxi        106.7000       33.1667          107       147     2012      06        05        157              0.262417      20.180756       5.075571       0.243241       0.435000   -9999.000000       0.095200   -9999.000000
57119     57119     shaanxi        106.7000       33.1667          107       147     2012      06        06        158              0.264417      17.350952       0.000000       0.271105       0.376500       0.207600       0.099200       0.792000
57119     57119     shaanxi        106.7000       33.1667          107       147     2012      06        07        159              0.254917      20.063660       0.000000       0.254061       0.391000   -9999.000000       0.090800       0.647000
57119     57119     shaanxi        106.7000       33.1667          107       147     2012      06        08        160              0.247417      22.129822       0.000000       0.243502       0.449000   -9999.000000   -9999.000000   -9999.000000
57119     57119     shaanxi        106.7000       33.1667          107       147     2012      06        09        161              0.238917      20.682098       0.000000       0.238408   -9999.000000       0.253300       0.085300       0.663000
57119     57119     shaanxi        106.7000       33.1667          107       147     2012      06        10        162              0.232542      22.810883       6.593116       0.229081       0.408000   -9999.000000       0.092400   -9999.000000
57119     57119     shaanxi        106.7000       33.1667          107       147     2012      06        11        163              0.000000      21.747894       3.770755       0.255106       0.435500       0.152400       0.092700       0.758000
57119     57119     shaanxi        106.7000       33.1667          107       147     2012      06        12        164              0.222500      20.160919       0.000000       0.256020       0.458000   -9999.000000       0.086600       0.611000
57119     57119     shaanxi        106.7000       33.1667          107       147     2012      06        13        165              0.213750      22.402679       0.259116       0.238676       0.421000   -9999.000000   -9999.000000       0.729000
57119     57119     shaanxi        106.7000       33.1667          107       147     2012      06        14        166              0.208042      23.033142       0.000000       0.227663   -9999.000000       0.206500   -9999.000000       0.709000
57119     57119     shaanxi        106.7000       33.1667          107       147     2012      06        15        167              0.200333      23.124054       0.000000       0.214662       0.464000   -9999.000000       0.087100   -9999.000000
57119     57119     shaanxi        106.7000       33.1667          107       147     2012      06        16        168              0.194958      21.584320       0.105177       0.207181       0.457500   -9999.000000       0.092200       0.643000
57119     57119     shaanxi        106.7000       33.1667          107       147     2012      06        17        169              0.191000      21.956146       0.000000       0.199486       0.417500   -9999.000000       0.091500   -9999.000000
57119     57119     shaanxi        106.7000       33.1667          107       147     2012      06        18        170              0.187333      19.464752       0.103474       0.198457       0.431000   -9999.000000       0.089000       0.677000
57119     57119     shaanxi        106.7000       33.1667          107       147     2012      06        19        171              0.181333      21.431396       0.778647       0.194327       0.449000   -9999.000000   -9999.000000       0.655000
57119     57119     shaanxi        106.7000       33.1667          107       147     2012      06        20        172              0.175042      23.660126       3.091681       0.189839       0.438000   -9999.000000       0.092100   -9999.000000
57119     57119     shaanxi        106.7000       33.1667          107       147     2012      06        21        173              0.171000      23.759644       0.247424       0.203512       0.462000   -9999.000000       0.081600       0.662000
57119     57119     shaanxi        106.7000       33.1667          107       147     2012      06        22        174              0.167042      24.059265       0.000000       0.194463       0.437000   -9999.000000       0.087400   -9999.000000
57119     57119     shaanxi        106.7000       33.1667          107       147     2012      06        23        175              0.162958      24.429565       0.000000       0.179597       0.481500   -9999.000000       0.086300       0.750000
57119     57119     shaanxi        106.7000       33.1667          107       147     2012      06        24        176              0.163667      25.487976       1.650003       0.166902       0.471000   -9999.000000   -9999.000000   -9999.000000
57119     57119     shaanxi        106.7000       33.1667          107       147     2012      06        25        177              0.323500      25.055817       8.431849       0.167795   -9999.000000   -9999.000000   -9999.000000   -9999.000000
57119     57119     shaanxi        106.7000       33.1667          107       147     2012      06        26        178              0.319958      22.047699       7.244668       0.245779       0.496000   -9999.000000       0.050800       1.000000
57119     57119     shaanxi        106.7000       33.1667          107       147     2012      06        27        179              0.335542      21.001007       0.718748       0.246227       0.488000   -9999.000000       0.053700   -9999.000000
57119     57119     shaanxi        106.7000       33.1667          107       147     2012      06        28        180              0.322917      21.089478       9.784755       0.246772       0.488000   -9999.000000       0.050200       0.950000
57119     57119     shaanxi        106.7000       33.1667          107       147     2012      06        29        181              0.358208      21.441132      14.432384       0.245171       0.490000   -9999.000000       0.048000   -9999.000000
57119     57119     shaanxi        106.7000       33.1667          107       147     2012      06        30        182              0.343292      20.947174       0.078512       0.298306   -9999.000000   -9999.000000   -9999.000000   -9999.000000
57119     57119     shaanxi        106.7000       33.1667          107       147     2012      07        01        183              0.332542      22.305573       1.042607       0.266929       0.405000   -9999.000000   -9999.000000       0.938000
57119     57119     shaanxi        106.7000       33.1667          107       147     2012      07        02        184              0.374917      21.373657      39.752430       0.262769       0.471000   -9999.000000       0.040500   -9999.000000
57119     57119     shaanxi        106.7000       33.1667          107       147     2012      07        03        185              0.362458      20.978210      10.554529       0.330977       0.349000   -9999.000000       0.030500       1.000000
57119     57119     shaanxi        106.7000       33.1667          107       147     2012      07        04        186              0.367167      22.305511       4.443729       0.309689       0.408000   -9999.000000       0.038900   -9999.000000
57119     57119     shaanxi        106.7000       33.1667          107       147     2012      07        05        187              0.343000      21.209717       0.000000       0.303932   -9999.000000   -9999.000000       0.036500       0.802000
57119     57119     shaanxi        106.7000       33.1667          107       147     2012      07        06        188              0.326542      23.370209       4.344892       0.282556   -9999.000000   -9999.000000   -9999.000000       0.722000
57119     57119     shaanxi        106.7000       33.1667          107       147     2012      07        07        189              0.369333      23.819702      10.463312       0.279182   -9999.000000   -9999.000000       0.043100   -9999.000000
57119     57119     shaanxi        106.7000       33.1667          107       147     2012      07        08        190              0.377875      22.682617      44.864594       0.300308       0.468000   -9999.000000       0.039300       1.000000
57119     57119     shaanxi        106.7000       33.1667          107       147     2012      07        09        191              0.374292      21.377197      11.313421       0.338771       0.467000   -9999.000000       0.112400   -9999.000000
57119     57119     shaanxi        106.7000       33.1667          107       147     2012      07        10        192              0.350625      21.397491       0.000000       0.321778       0.388000   -9999.000000       0.106400       0.838000
57119     57119     shaanxi        106.7000       33.1667          107       147     2012      07        11        193              0.335667      24.539490       0.394384       0.294909       0.470000   -9999.000000   -9999.000000       0.717000
57119     57119     shaanxi        106.7000       33.1667          107       147     2012      07        12        194              0.318167      23.997375       0.000000       0.285079       0.464000   -9999.000000   -9999.000000       0.887000
57119     57119     shaanxi        106.7000       33.1667          107       147     2012      07        13        195              0.174792      24.321777       2.809533       0.276599       0.452000   -9999.000000       0.105400       0.730000
57119     57119     shaanxi        106.7000       33.1667          107       147     2012      07        14        196              0.141583      24.354523       3.280210       0.275842       0.454500   -9999.000000       0.109300   -9999.000000
57119     57119     shaanxi        106.7000       33.1667          107       147     2012      07        15        197              0.130417      24.508453       1.547016       0.276334       0.470000       0.115900       0.101900       0.692000
57119     57119     shaanxi        106.7000       33.1667          107       147     2012      07        16        198              0.121417      25.079193       1.587850       0.270877   -9999.000000   -9999.000000       0.080400   -9999.000000
57119     57119     shaanxi        106.7000       33.1667          107       147     2012      07        17        199              0.118083      23.762024       1.043085       0.272774       0.471000   -9999.000000   -9999.000000       0.683000
57119     57119     shaanxi        106.7000       33.1667          107       147     2012      07        18        200              0.111542      21.903107       0.192404       0.267152       0.473500   -9999.000000   -9999.000000       0.719000
57119     57119     shaanxi        106.7000       33.1667          107       147     2012      07        19        201              0.110042      22.944794       9.551551       0.261626       0.478000   -9999.000000       0.091900   -9999.000000
57119     57119     shaanxi        106.7000       33.1667          107       147     2012      07        20        202              0.192174      22.950623       8.764583       0.273359       0.497000       0.110600       0.080200       0.987000
57119     57119     shaanxi        106.7000       33.1667          107       147     2012      07        21        203              0.217087      22.943146      41.260941       0.301861   -9999.000000   -9999.000000       0.078800   -9999.000000
57119     57119     shaanxi        106.7000       33.1667          107       147     2012      07        22        204              0.200833      21.162018       6.339723       0.339409   -9999.000000   -9999.000000       0.080600       0.724000
57119     57119     shaanxi        106.7000       33.1667          107       147     2012      07        23        205              0.192542      23.193451      11.100535       0.308923   -9999.000000   -9999.000000   -9999.000000   -9999.000000
57119     57119     shaanxi        106.7000       33.1667          107       147     2012      07        24        206              0.184333      20.898193       0.364219       0.316027       0.496000   -9999.000000       0.123400   -9999.000000
57119     57119     shaanxi        106.7000       33.1667          107       147     2012      07        25        207              0.175208      22.551849       1.153264       0.297495   -9999.000000   -9999.000000       0.123700       0.855000
57119     57119     shaanxi        106.7000       33.1667          107       147     2012      07        26        208              0.176217      23.442078       0.851173       0.290482   -9999.000000   -9999.000000       0.126000   -9999.000000
57119     57119     shaanxi        106.7000       33.1667          107       147     2012      07        27        209              0.171708      23.621826       0.990620       0.286770   -9999.000000   -9999.000000       0.120200       0.815000
57119     57119     shaanxi        106.7000       33.1667          107       147     2012      07        28        210              0.161833      24.339203       0.251824       0.281156   -9999.000000   -9999.000000   -9999.000000   -9999.000000
57119     57119     shaanxi        106.7000       33.1667          107       147     2012      07        29        211              0.154625      25.372040       1.292761       0.273684       0.489000   -9999.000000   -9999.000000   -9999.000000
57119     57119     shaanxi        106.7000       33.1667          107       147     2012      07        30        212              0.153167      26.022522       0.876517       0.268372       0.497000   -9999.000000       0.062400       0.712000
57119     57119     shaanxi        106.7000       33.1667          107       147     2012      07        31        213              0.147417      24.996368       1.178133       0.265533   -9999.000000       0.215100       0.066600   -9999.000000
57119     57119     shaanxi        106.7000       33.1667          107       147     2012      08        01        214              0.172958      23.721466      11.588957       0.263476   -9999.000000   -9999.000000       0.065000       0.893000
57119     57119     shaanxi        106.7000       33.1667          107       147     2012      08        02        215              0.168042      21.642029       0.219860       0.297827       0.497000       0.101200       0.063600   -9999.000000
57119     57119     shaanxi        106.7000       33.1667          107       147     2012      08        03        216              0.153333      23.446655       0.000000       0.280299       0.495500   -9999.000000   -9999.000000       0.836000
57119     57119     shaanxi        106.7000       33.1667          107       147     2012      08        04        217              0.139208      24.790985       0.000000       0.270167       0.497000   -9999.000000       0.067200       0.755000
57119     57119     shaanxi        106.7000       33.1667          107       147     2012      08        05        218              0.127292      25.286987       0.720310       0.261047       0.496000   -9999.000000       0.063300   -9999.000000
57119     57119     shaanxi        106.7000       33.1667          107       147     2012      08        06        219              0.120250      25.206421       5.089081       0.255250       0.498000   -9999.000000       0.160900       0.882000
57119     57119     shaanxi        106.7000       33.1667          107       147     2012      08        07        220              0.115292      24.589783       0.000000       0.271155   -9999.000000       0.048700       0.152900   -9999.000000
57119     57119     shaanxi        106.7000       33.1667          107       147     2012      08        08        221              0.107958      25.465149       0.251067       0.261151       0.497000   -9999.000000       0.144700       0.767000
57119     57119     shaanxi        106.7000       33.1667          107       147     2012      08        09        222              0.100542      25.838928       0.222571       0.253390       0.488500   -9999.000000   -9999.000000       0.685000
57119     57119     shaanxi        106.7000       33.1667          107       147     2012      08        10        223              0.093292      25.820526       0.000000       0.247959       0.492500   -9999.000000       0.156900       0.751000
57119     57119     shaanxi        106.7000       33.1667          107       147     2012      08        11        224              0.087000      26.120605       0.090985       0.239661       0.498000   -9999.000000       0.156800       0.685000
57119     57119     shaanxi        106.7000       33.1667          107       147     2012      08        12        225              0.081625      25.597748       2.100924       0.236971   -9999.000000       0.116100       0.151300   -9999.000000
57119     57119     shaanxi        106.7000       33.1667          107       147     2012      08        13        226              0.127083      26.260498      31.943672       0.233834   -9999.000000   -9999.000000       0.167000       0.807000
57119     57119     shaanxi        106.7000       33.1667          107       147     2012      08        14        227              0.215000      26.807800      14.753837       0.276962   -9999.000000   -9999.000000   -9999.000000   -9999.000000
57119     57119     shaanxi        106.7000       33.1667          107       147     2012      08        15        228              0.185500      23.906494       0.616796       0.318295       0.479000   -9999.000000   -9999.000000       0.840000
57119     57119     shaanxi        106.7000       33.1667          107       147     2012      08        16        229              0.192792      25.483673       1.385494       0.286683   -9999.000000   -9999.000000       0.178900       0.843000
57119     57119     shaanxi        106.7000       33.1667          107       147     2012      08        17        230              0.249250      23.919678       8.304681       0.281103   -9999.000000   -9999.000000       0.183100   -9999.000000
57119     57119     shaanxi        106.7000       33.1667          107       147     2012      08        18        231              0.276792      23.377808       0.946233       0.291220   -9999.000000   -9999.000000       0.176300       0.727000
57119     57119     shaanxi        106.7000       33.1667          107       147     2012      08        19        232              0.297375      22.290833      12.556482       0.285940   -9999.000000   -9999.000000       0.177900   -9999.000000
57119     57119     shaanxi        106.7000       33.1667          107       147     2012      08        20        233              0.288250      21.141541       0.289681       0.306847   -9999.000000       0.062000   -9999.000000       0.792000
57119     57119     shaanxi        106.7000       33.1667          107       147     2012      08        21        234              0.268750      20.673828       2.310153       0.290806       0.497500   -9999.000000       0.122800   -9999.000000
57119     57119     shaanxi        106.7000       33.1667          107       147     2012      08        22        235              0.251417      22.627899       2.193660       0.278742       0.492000   -9999.000000       0.117100   -9999.000000
57119     57119     shaanxi        106.7000       33.1667          107       147     2012      08        23        236              0.234167      22.456299       0.000000       0.275838   -9999.000000       0.037600       0.126300       0.664000
57119     57119     shaanxi        106.7000       33.1667          107       147     2012      08        24        237              0.219833      21.627197       0.000000       0.271917   -9999.000000   -9999.000000       0.118800   -9999.000000
57119     57119     shaanxi        106.7000       33.1667          107       147     2012      08        25        238              0.000000      21.972870       1.919899       0.266479       0.495500   -9999.000000   -9999.000000       0.749000
57119     57119     shaanxi        106.7000       33.1667          107       147     2012      08        26        239              0.201375      23.127228       0.000000       0.266962       0.492500   -9999.000000   -9999.000000   -9999.000000
57119     57119     shaanxi        106.7000       33.1667          107       147     2012      08        27        240              0.245417      23.593933       3.733991       0.262093       0.497000       0.095500       0.139800   -9999.000000
57119     57119     shaanxi        106.7000       33.1667          107       147     2012      08        28        241              0.267542      23.259613       0.525093       0.269109   -9999.000000   -9999.000000       0.143700       0.690000
57119     57119     shaanxi        106.7000       33.1667          107       147     2012      08        29        242              0.249292      24.018799       0.208563       0.261612       0.498000   -9999.000000       0.137000   -9999.000000
57119     57119     shaanxi        106.7000       33.1667          107       147     2012      08        30        243              0.256667      24.504761       9.947593       0.254246   -9999.000000       0.202200       0.148900       0.978000
57119     57119     shaanxi        106.7000       33.1667          107       147     2012      08        31        244              0.321875      22.565002      54.719112       0.275365       0.497000       0.011600   -9999.000000   -9999.000000
57119     57119     shaanxi        106.7000       33.1667          107       147     2012      09        01        245              0.312250      21.204834      19.457153       0.342773       0.365500   -9999.000000   -9999.000000       1.000000
57119     57119     shaanxi        106.7000       33.1667          107       147     2012      09        02        246              0.289625      18.310974       0.000000       0.327811       0.273000       0.063100       0.140600       0.638000
57119     57119     shaanxi        106.7000       33.1667          107       147     2012      09        03        247              0.275125      20.644104       0.000000       0.298632   -9999.000000   -9999.000000       0.148600   -9999.000000
57119     57119     shaanxi        106.7000       33.1667          107       147     2012      09        04        248              0.259875      20.664978       0.000000       0.288291       0.321000       0.289000       0.143100       0.799000
57119     57119     shaanxi        106.7000       33.1667          107       147     2012      09        05        249              0.244083      21.206421       0.000000       0.282400       0.265000   -9999.000000       0.139400   -9999.000000
57119     57119     shaanxi        106.7000       33.1667          107       147     2012      09        06        250              0.231417      21.737335       0.000000       0.277693       0.280000   -9999.000000   -9999.000000       0.595000
57119     57119     shaanxi        106.7000       33.1667          107       147     2012      09        07        251              0.272417      22.266449      23.084972       0.273966       0.360000       0.064900       0.155400       1.000000
57119     57119     shaanxi        106.7000       33.1667          107       147     2012      09        08        252              0.292250      21.076355       0.000000       0.309885   -9999.000000   -9999.000000       0.139700       0.833000
57119     57119     shaanxi        106.7000       33.1667          107       147     2012      09        09        253              0.279583      21.647827       4.761462       0.299631   -9999.000000       0.230100       0.150700       0.724000
57119     57119     shaanxi        106.7000       33.1667          107       147     2012      09        10        254              0.312375      20.935577      13.832580       0.293676       0.341000   -9999.000000       0.094400   -9999.000000
57119     57119     shaanxi        106.7000       33.1667          107       147     2012      09        11        255              0.300375      18.829224       0.000000       0.317525       0.348500   -9999.000000   -9999.000000       0.705000
57119     57119     shaanxi        106.7000       33.1667          107       147     2012      09        12        256              0.287000      20.202728       0.000000       0.295552       0.428000   -9999.000000   -9999.000000   -9999.000000
57119     57119     shaanxi        106.7000       33.1667          107       147     2012      09        13        257              0.271917      17.637604       0.000000       0.286523       0.402000   -9999.000000       0.082500       0.656000
57119     57119     shaanxi        106.7000       33.1667          107       147     2012      09        14        258              0.260167      17.568268       0.000000       0.281405       0.414000   -9999.000000       0.084600       0.578000
57119     57119     shaanxi        106.7000       33.1667          107       147     2012      09        15        259              0.252750      18.463379       1.523142       0.277860       0.430000       0.033500       0.086200   -9999.000000
57119     57119     shaanxi        106.7000       33.1667          107       147     2012      09        16        260              0.256125      16.724457       2.361935       0.280324       0.463000   -9999.000000       0.084400       0.801000
57119     57119     shaanxi        106.7000       33.1667          107       147     2012      09        17        261              0.250875      16.683014       0.151954       0.286766       0.420000   -9999.000000   -9999.000000   -9999.000000
57119     57119     shaanxi        106.7000       33.1667          107       147     2012      09        18        262              0.239833      17.449127       0.000000       0.279117       0.408000   -9999.000000   -9999.000000       0.674000
57119     57119     shaanxi        106.7000       33.1667          107       147     2012      09        19        263              0.229708      18.509338       0.000000       0.274786   -9999.000000   -9999.000000       0.076600   -9999.000000
57119     57119     shaanxi        106.7000       33.1667          107       147     2012      09        20        264              0.229958      19.205597       0.578032       0.270939       0.438000   -9999.000000       0.079300   -9999.000000
57119     57119     shaanxi        106.7000       33.1667          107       147     2012      09        21        265              0.236375      17.532959       0.000000       0.273257   -9999.000000   -9999.000000       0.080100       0.611000
57119     57119     shaanxi        106.7000       33.1667          107       147     2012      09        22        266              0.230625      19.328369       0.047436       0.270203       0.180000   -9999.000000       0.076700   -9999.000000
57119     57119     shaanxi        106.7000       33.1667          107       147     2012      09        23        267              0.229500      18.490387       0.457716       0.269695       0.216000   -9999.000000   -9999.000000       0.702000
57119     57119     shaanxi        106.7000       33.1667          107       147     2012      09        24        268              0.246708      18.055481       9.641289       0.270188   -9999.000000   -9999.000000       0.072000   -9999.000000
57119     57119     shaanxi        106.7000       33.1667          107       147     2012      09        25        269              0.297000      17.323486       5.189682       0.282911       0.209000       0.064200       0.068300   -9999.000000
57119     57119     shaanxi        106.7000       33.1667          107       147     2012      09        26        270              0.286375      16.621918       0.271699       0.302974       0.183000   -9999.000000       0.071500       0.730000
57119     57119     shaanxi        106.7000       33.1667          107       147     2012      09        27        271              0.277214      17.291656       0.319137       0.286718       0.190000       0.445200       0.069800   -9999.000000
57119     57119     shaanxi        106.7000       33.1667          107       147     2012      09        28        272              0.252467      18.147644       0.500868       0.280747       0.201000   -9999.000000   -9999.000000       0.633000
57119     57119     shaanxi        106.7000       33.1667          107       147     2012      09        29        273              0.243667      17.866760       3.729297       0.276298       0.196000   -9999.000000   -9999.000000   -9999.000000
57119     57119     shaanxi        106.7000       33.1667          107       147     2012      09        30        274              0.240625      18.357666       0.000000       0.281293   -9999.000000   -9999.000000       0.067500       0.630000
57119     57119     shaanxi        106.7000       33.1667          107       147     2012      10        01        275              0.234833      18.371063       1.470506       0.277329       0.244000   -9999.000000       0.053300       0.603000
57119     57119     shaanxi        106.7000       33.1667          107       147     2012      10        02        276              0.281042      17.600983      19.032646       0.277570       0.293000   -9999.000000       0.055800   -9999.000000
57119     57119     shaanxi        106.7000       33.1667          107       147     2012      10        03        277              0.281833      16.203156       0.000000       0.313408       0.225500   -9999.000000       0.050200       0.665000
57119     57119     shaanxi        106.7000       33.1667          107       147     2012      10        04        278              0.272458      17.146820       0.370916       0.294065       0.227000   -9999.000000   -9999.000000   -9999.000000
57119     57119     shaanxi        106.7000       33.1667          107       147     2012      10        05        279              0.263917      16.800568       0.313986       0.286258   -9999.000000   -9999.000000       0.053300       0.615000
57119     57119     shaanxi        106.7000       33.1667          107       147     2012      10        06        280              0.262792      16.891418       0.339568       0.281852       0.283000   -9999.000000       0.050900       0.614000
57119     57119     shaanxi        106.7000       33.1667          107       147     2012      10        07        281              0.261000      15.526306       0.149330       0.279959       0.267000       0.128700       0.058000   -9999.000000
57119     57119     shaanxi        106.7000       33.1667          107       147     2012      10        08        282              0.263250      14.566376       0.952809       0.279191       0.232500   -9999.000000       0.050000       0.843000
57119     57119     shaanxi        106.7000       33.1667          107       147     2012      10        09        283              0.258375      14.239655       0.000000       0.281235       0.257000   -9999.000000       0.045200   -9999.000000
57119     57119     shaanxi        106.7000       33.1667          107       147     2012      10        10        284              0.250917      15.728912       0.527707       0.276206       0.260000   -9999.000000   -9999.000000       0.569000
57119     57119     shaanxi        106.7000       33.1667          107       147     2012      10        11        285              0.250667      15.392334       0.938454       0.275279   -9999.000000       0.386700       0.047200   -9999.000000
57119     57119     shaanxi        106.7000       33.1667          107       147     2012      10        12        286              0.252000      14.275208       0.270627       0.278446       0.172000       0.322700       0.047400       0.750000
57119     57119     shaanxi        106.7000       33.1667          107       147     2012      10        13        287              0.246625      14.409241       0.000000       0.276823       0.164000       0.063100       0.046600       0.578000
57119     57119     shaanxi        106.7000       33.1667          107       147     2012      10        14        288              0.241250      15.310516       0.000000       0.273856       0.187000   -9999.000000       0.049300   -9999.000000
57119     57119     shaanxi        106.7000       33.1667          107       147     2012      10        15        289              0.238333      14.682129       0.102373       0.272860       0.191000   -9999.000000   -9999.000000       0.525000
57119     57119     shaanxi        106.7000       33.1667          107       147     2012      10        16        290              0.230542      13.941833       0.000000       0.272374   -9999.000000   -9999.000000   -9999.000000   -9999.000000
57119     57119     shaanxi        106.7000       33.1667          107       147     2012      10        17        291              0.222417      13.983887       0.000000       0.268538       0.188000       0.048800       0.076400       0.614000
57119     57119     shaanxi        106.7000       33.1667          107       147     2012      10        18        292              0.219583      14.610779       0.562205       0.266741       0.171000   -9999.000000       0.079200   -9999.000000
57119     57119     shaanxi        106.7000       33.1667          107       147     2012      10        19        293              0.217750      13.169830       0.000000       0.268272       0.162500   -9999.000000       0.073600   -9999.000000
57119     57119     shaanxi        106.7000       33.1667          107       147     2012      10        20        294              0.215708      14.319244       0.000000       0.267816       0.177000   -9999.000000       0.075300       0.662000
57119     57119     shaanxi        106.7000       33.1667          107       147     2012      10        21        295              0.215292      14.350250       0.596460       0.267586   -9999.000000   -9999.000000   -9999.000000   -9999.000000
57119     57119     shaanxi        106.7000       33.1667          107       147     2012      10        22        296              0.210708      11.839050       0.000000       0.269297   -9999.000000   -9999.000000       0.127100       0.576000
57119     57119     shaanxi        106.7000       33.1667          107       147     2012      10        23        297              0.209500      12.520081       0.591861       0.265586   -9999.000000   -9999.000000       0.113700   -9999.000000
57119     57119     shaanxi        106.7000       33.1667          107       147     2012      10        24        298              0.208750      10.228699       0.000000       0.268187   -9999.000000   -9999.000000       0.122500   -9999.000000
57119     57119     shaanxi        106.7000       33.1667          107       147     2012      10        25        299              0.000000      11.834839       0.089710       0.265883       0.283500   -9999.000000       0.123400       0.514000
57119     57119     shaanxi        106.7000       33.1667          107       147     2012      10        26        300              0.204708      10.665436       0.575819       0.266031       0.252000   -9999.000000   -9999.000000   -9999.000000
57119     57119     shaanxi        106.7000       33.1667          107       147     2012      10        27        301              0.200958      13.171814       0.000000       0.264293   -9999.000000   -9999.000000   -9999.000000       0.482000
57119     57119     shaanxi        106.7000       33.1667          107       147     2012      10        28        302              0.000000      13.372650       0.379284       0.263656       0.268000   -9999.000000       0.119100   -9999.000000
57119     57119     shaanxi        106.7000       33.1667          107       147     2012      10        29        303              0.200542      12.384247       0.795166       0.264765       0.246000   -9999.000000       0.106300       0.539000
57119     57119     shaanxi        106.7000       33.1667          107       147     2012      10        30        304              0.197708      12.581390       0.000000       0.263997       0.246500   -9999.000000       0.101200       0.452000
57119     57119     shaanxi        106.7000       33.1667          107       147     2012      10        31        305              0.193500      11.853180       0.206947       0.261982       0.248000   -9999.000000       0.106200   -9999.000000
57119     57119     shaanxi        106.7000       33.1667          107       147     2012      11        01        306              0.276583      12.208862      21.562006       0.261579   -9999.000000   -9999.000000   -9999.000000       0.689000
57119     57119     shaanxi        106.7000       33.1667          107       147     2012      11        02        307              0.276250      10.349182       0.169058       0.315124       0.198000   -9999.000000   -9999.000000   -9999.000000
57119     57119     shaanxi        106.7000       33.1667          107       147     2012      11        03        308              0.267625      10.543213       0.000000       0.289595       0.183000   -9999.000000       0.107600       0.456000
57119     57119     shaanxi        106.7000       33.1667          107       147     2012      11        04        309              0.259083       7.895508       0.000000       0.281139       0.170000   -9999.000000       0.113700       0.500000
57119     57119     shaanxi        106.7000       33.1667          107       147     2012      11        05        310              0.250792       8.597565       0.000000       0.277003       0.192000   -9999.000000       0.098000   -9999.000000
57119     57119     shaanxi        106.7000       33.1667          107       147     2012      11        06        311              0.247958       9.965881       8.302672       0.274315       0.195000   -9999.000000       0.099300       0.569000
57119     57119     shaanxi        106.7000       33.1667          107       147     2012      11        07        312              0.289042       8.891968       1.259340       0.284630       0.208000   -9999.000000   -9999.000000   -9999.000000
57119     57119     shaanxi        106.7000       33.1667          107       147     2012      11        08        313              0.283500       7.717804       0.658159       0.295362       0.230000   -9999.000000       0.105600       0.664000
57119     57119     shaanxi        106.7000       33.1667          107       147     2012      11        09        314              0.288375       8.062164       1.280250       0.285219       0.209000   -9999.000000       0.101700   -9999.000000
57119     57119     shaanxi        106.7000       33.1667          107       147     2012      11        10        315              0.281708       7.437164       0.000000       0.285798       0.202000   -9999.000000       0.101700       0.648000
57119     57119     shaanxi        106.7000       33.1667          107       147     2012      11        11        316              0.272125       7.237610       0.000000       0.279766       0.146000   -9999.000000       0.103600       0.479000
57119     57119     shaanxi        106.7000       33.1667          107       147     2012      11        12        317              0.263958       8.285187       9.304837       0.276336   -9999.000000   -9999.000000   -9999.000000   -9999.000000
57119     57119     shaanxi        106.7000       33.1667          107       147     2012      11        13        318              0.000000       9.270020       0.000000       0.275057       0.158000   -9999.000000   -9999.000000       0.577000
57119     57119     shaanxi        106.7000       33.1667          107       147     2012      11        14        319              0.254500       9.303894       0.647491       0.274082       0.155500   -9999.000000       0.091600   -9999.000000
57119     57119     shaanxi        106.7000       33.1667          107       147     2012      11        15        320              0.268292       9.004028       5.057726       0.273810       0.164000   -9999.000000       0.090000       0.622000
57119     57119     shaanxi        106.7000       33.1667          107       147     2012      11        16        321              0.269917       7.278656       0.000000       0.289365       0.146000   -9999.000000       0.083200   -9999.000000
57119     57119     shaanxi        106.7000       33.1667          107       147     2012      11        17        322              0.000000       8.131439       0.000000       0.278885   -9999.000000   -9999.000000       0.086300   -9999.000000
57119     57119     shaanxi        106.7000       33.1667          107       147     2012      11        18        323              0.256167       8.683868       0.000000       0.275693       0.162000   -9999.000000   -9999.000000       0.637000
57119     57119     shaanxi        106.7000       33.1667          107       147     2012      11        19        324              0.252458       9.291321       0.000000       0.273601       0.160000   -9999.000000   -9999.000000   -9999.000000
57119     57119     shaanxi        106.7000       33.1667          107       147     2012      11        20        325              0.250000       6.916809       0.000000       0.273239       0.152500   -9999.000000       0.078800       0.587000
57119     57119     shaanxi        106.7000       33.1667          107       147     2012      11        21        326              0.247333       6.680786       0.000000       0.273027       0.148000   -9999.000000       0.083000   -9999.000000
57119     57119     shaanxi        106.7000       33.1667          107       147     2012      11        22        327              0.244042       7.476410       2.255269       0.272392       0.154000   -9999.000000       0.079400   -9999.000000
57119     57119     shaanxi        106.7000       33.1667          107       147     2012      11        23        328              0.238500       6.569855       0.000000       0.270437   -9999.000000   -9999.000000       0.078600       0.463000
57119     57119     shaanxi        106.7000       33.1667          107       147     2012      11        24        329              0.236000       6.179260       1.393665       0.268835       0.153000   -9999.000000   -9999.000000   -9999.000000
57119     57119     shaanxi        106.7000       33.1667          107       147     2012      11        25        330              0.240250       4.083252       0.241444       0.271914       0.151000   -9999.000000       0.079700       0.371000
57119     57119     shaanxi        106.7000       33.1667          107       147     2012      11        26        331              0.238042       3.729950       0.000000       0.268715       0.147000   -9999.000000   -9999.000000   -9999.000000
57119     57119     shaanxi        106.7000       33.1667          107       147     2012      11        27        332              0.235583       4.029358       0.000000       0.264958       0.149000   -9999.000000       0.091500       0.330000
57119     57119     shaanxi        106.7000       33.1667          107       147     2012      11        28        333              0.233875       3.919281       0.416045       0.264892   -9999.000000   -9999.000000       0.089500       0.418000
57119     57119     shaanxi        106.7000       33.1667          107       147     2012      11        29        334              0.232542       4.245789       0.000000       0.264961       0.148000   -9999.000000   -9999.000000   -9999.000000
57119     57119     shaanxi        106.7000       33.1667          107       147     2012      11        30        335              0.231458       3.929382       1.321943       0.266205       0.146500   -9999.000000   -9999.000000       0.333000
57119     57119     shaanxi        106.7000       33.1667          107       147     2012      12        01        336              0.232125       3.485321       0.244365       0.269133       0.126000   -9999.000000       0.090300   -9999.000000
57119     57119     shaanxi        106.7000       33.1667          107       147     2012      12        02        337              0.231042       4.410797       0.000000       0.272490       0.151000   -9999.000000       0.091000       0.347000
57119     57119     shaanxi        106.7000       33.1667          107       147     2012      12        03        338              0.227833       3.968689       0.000000       0.269454       0.142000   -9999.000000       0.085000       0.449000
57119     57119     shaanxi        106.7000       33.1667          107       147     2012      12        04        339              0.226208       4.376251       0.000000       0.267112   -9999.000000   -9999.000000       0.086200       0.500000
57119     57119     shaanxi        106.7000       33.1667          107       147     2012      12        05        340              0.223917       5.133545       0.000000       0.266107       0.149000   -9999.000000   -9999.000000       0.360000
57119     57119     shaanxi        106.7000       33.1667          107       147     2012      12        06        341              0.222125       5.140045       0.000000       0.264445       0.130000   -9999.000000       0.089200   -9999.000000
57119     57119     shaanxi        106.7000       33.1667          107       147     2012      12        07        342              0.222375       6.267090       0.000000       0.265396       0.134000   -9999.000000       0.076900       0.391000
57119     57119     shaanxi        106.7000       33.1667          107       147     2012      12        08        343              0.221292       5.634766       0.000000       0.264024       0.134000   -9999.000000       0.091300   -9999.000000
57119     57119     shaanxi        106.7000       33.1667          107       147     2012      12        09        344              0.221000       4.411133       0.000000       0.265098   -9999.000000   -9999.000000       0.089900       0.440000
57119     57119     shaanxi        106.7000       33.1667          107       147     2012      12        10        345              0.220292       4.043610       0.000000       0.266222   -9999.000000   -9999.000000       0.070500       0.238000
57119     57119     shaanxi        106.7000       33.1667          107       147     2012      12        11        346              0.219667       4.232117       0.863506       0.264148       0.147000   -9999.000000   -9999.000000   -9999.000000
57119     57119     shaanxi        106.7000       33.1667          107       147     2012      12        12        347              0.219083       2.545074       0.302499       0.265384       0.156500   -9999.000000       0.073600       0.256000
57119     57119     shaanxi        106.7000       33.1667          107       147     2012      12        13        348              0.218958       2.074738       0.111943       0.261421   -9999.000000   -9999.000000       0.073800   -9999.000000
57119     57119     shaanxi        106.7000       33.1667          107       147     2012      12        14        349              0.217417       1.754578       0.000000       0.258749   -9999.000000   -9999.000000       0.065900       0.388000
57119     57119     shaanxi        106.7000       33.1667          107       147     2012      12        15        350              0.000000       3.190826       0.000000       0.263987       0.154000   -9999.000000       0.070700   -9999.000000
57119     57119     shaanxi        106.7000       33.1667          107       147     2012      12        16        351              0.216250       3.379639       0.000000       0.266679       0.142000   -9999.000000   -9999.000000   -9999.000000
57119     57119     shaanxi        106.7000       33.1667          107       147     2012      12        17        352              0.216708       3.684937       0.192103       0.267237   -9999.000000   -9999.000000   -9999.000000       0.177000
57119     57119     shaanxi        106.7000       33.1667          107       147     2012      12        18        353              0.217000       1.794434       0.199430       0.255014       0.163000   -9999.000000       0.055300   -9999.000000
57119     57119     shaanxi        106.7000       33.1667          107       147     2012      12        19        354              0.218042       1.977997       1.470977       0.254497   -9999.000000   -9999.000000       0.061400       0.355000
57119     57119     shaanxi        106.7000       33.1667          107       147     2012      12        20        355              0.000000       1.641724       0.412768       0.256205   -9999.000000   -9999.000000       0.055400   -9999.000000
57119     57119     shaanxi        106.7000       33.1667          107       147     2012      12        21        356              0.220125       1.129486       0.066887       0.242760   -9999.000000   -9999.000000       0.054600   -9999.000000
57119     57119     shaanxi        106.7000       33.1667          107       147     2012      12        22        357              0.217333       1.593231       0.802232       0.236010       0.134000   -9999.000000   -9999.000000       0.109000
57119     57119     shaanxi        106.7000       33.1667          107       147     2012      12        23        358              0.214042       1.055634       0.000000       0.211934       0.132000   -9999.000000       0.058500   -9999.000000
57119     57119     shaanxi        106.7000       33.1667          107       147     2012      12        24        359              0.212833       0.357483       0.000000       0.188326   -9999.000000   -9999.000000       0.069900       0.166000
57119     57119     shaanxi        106.7000       33.1667          107       147     2012      12        25        360              0.212542       0.591675       1.175210       0.201893   -9999.000000   -9999.000000       0.078400   -9999.000000
57119     57119     shaanxi        106.7000       33.1667          107       147     2012      12        26        361              0.000000       0.226807       0.626734       0.184990   -9999.000000   -9999.000000       0.075400   -9999.000000
57119     57119     shaanxi        106.7000       33.1667          107       147     2012      12        27        362              0.211455      -0.089203       0.000000       0.173565   -9999.000000   -9999.000000   -9999.000000       0.052000
57119     57119     shaanxi        106.7000       33.1667          107       147     2012      12        28        363              0.000000      -0.230072       1.124302       0.156773   -9999.000000   -9999.000000   -9999.000000   -9999.000000
57119     57119     shaanxi        106.7000       33.1667          107       147     2012      12        29        364              0.000000      -0.469635       0.000000       0.168468   -9999.000000   -9999.000000       0.072600   -9999.000000
57119     57119     shaanxi        106.7000       33.1667          107       147     2012      12        30        365              0.000000      -2.290619       0.000000       0.133301       0.144000   -9999.000000       0.073000   -9999.000000
57119     57119     shaanxi        106.7000       33.1667          107       147     2012      12        31        366              0.204467      -1.109711       0.000000       0.153090   -9999.000000   -9999.000000       0.051200   -9999.000000
