# Supplementary material for: Research on Fusing Multisatellite Soil Moisture Data Based on Bayesian Model Averaging
Source: Hindawi journal article supplement (doi:10.1155/2018/9310838), 2018-06-25
Supplement: f1 [file 9310838.f1.zip › 2012_sm00-10cm_daily_ZDB_ZHY_57123_366days_allin.txt]

57123     57123     shaanxi        108.0669       34.2944          103       152     2012      01        01        001              0.000000   -9999.000000       0.000000   -9999.000000   -9999.000000   -9999.000000       0.073600   -9999.000000
57123     57123     shaanxi        108.0669       34.2944          103       152     2012      01        02        002              0.270875       0.334778       0.000000       0.224955       0.116000   -9999.000000   -9999.000000       0.177000
57123     57123     shaanxi        108.0669       34.2944          103       152     2012      01        03        003              0.000000       1.427063       0.000000       0.244974   -9999.000000   -9999.000000       0.081300   -9999.000000
57123     57123     shaanxi        108.0669       34.2944          103       152     2012      01        04        004              0.259304       0.275726       0.000000       0.231537   -9999.000000   -9999.000000       0.074500       0.068000
57123     57123     shaanxi        108.0669       34.2944          103       152     2012      01        05        005              0.239900      -1.206848       0.000000       0.206463   -9999.000000   -9999.000000       0.082100   -9999.000000
57123     57123     shaanxi        108.0669       34.2944          103       152     2012      01        06        006              0.234708      -1.333038       0.000000       0.197322   -9999.000000   -9999.000000       0.088200       0.204000
57123     57123     shaanxi        108.0669       34.2944          103       152     2012      01        07        007              0.249167      -0.028595       0.000000       0.218101   -9999.000000   -9999.000000   -9999.000000       0.024000
57123     57123     shaanxi        108.0669       34.2944          103       152     2012      01        08        008              0.000000      -0.177673       0.000000       0.216877   -9999.000000   -9999.000000   -9999.000000   -9999.000000
57123     57123     shaanxi        108.0669       34.2944          103       152     2012      01        09        009              0.251042       0.593170       0.000000       0.229959   -9999.000000   -9999.000000   -9999.000000       0.090000
57123     57123     shaanxi        108.0669       34.2944          103       152     2012      01        10        010              0.252000       1.119781       0.000000       0.238666   -9999.000000   -9999.000000       0.057600   -9999.000000
57123     57123     shaanxi        108.0669       34.2944          103       152     2012      01        11        011              0.248792       0.410706       0.000000       0.230902   -9999.000000   -9999.000000       0.057500       0.014000
57123     57123     shaanxi        108.0669       34.2944          103       152     2012      01        12        012              0.247625       0.315521       0.000000       0.226584   -9999.000000   -9999.000000       0.063000   -9999.000000
57123     57123     shaanxi        108.0669       34.2944          103       152     2012      01        13        013              0.255542       0.451721       0.000000       0.230174   -9999.000000   -9999.000000   -9999.000000   -9999.000000
57123     57123     shaanxi        108.0669       34.2944          103       152     2012      01        14        014              0.257625       0.771545       0.000000       0.241269   -9999.000000   -9999.000000       0.056400       0.072000
57123     57123     shaanxi        108.0669       34.2944          103       152     2012      01        15        015              0.253917       1.475281       0.000000       0.247920   -9999.000000   -9999.000000       0.046700   -9999.000000
57123     57123     shaanxi        108.0669       34.2944          103       152     2012      01        16        016              0.251250       0.870789       0.000000       0.237297   -9999.000000   -9999.000000       0.046000       0.053000
57123     57123     shaanxi        108.0669       34.2944          103       152     2012      01        17        017              0.000000       0.446686       0.135016       0.234175       0.114000   -9999.000000       0.047400   -9999.000000
57123     57123     shaanxi        108.0669       34.2944          103       152     2012      01        18        018              0.249500       1.505463       0.000000       0.252946   -9999.000000   -9999.000000       0.052300   -9999.000000
57123     57123     shaanxi        108.0669       34.2944          103       152     2012      01        19        019              0.251542       0.369263       0.000000       0.238446   -9999.000000   -9999.000000   -9999.000000       0.240000
57123     57123     shaanxi        108.0669       34.2944          103       152     2012      01        20        020              0.254292       0.732452       0.418072       0.246711   -9999.000000   -9999.000000       0.045500   -9999.000000
57123     57123     shaanxi        108.0669       34.2944          103       152     2012      01        21        021              0.256583       0.677948       3.638560       0.250535   -9999.000000   -9999.000000       0.045600       0.103000
57123     57123     shaanxi        108.0669       34.2944          103       152     2012      01        22        022              0.260125      -0.189423       0.703087       0.226642   -9999.000000   -9999.000000       0.044700   -9999.000000
57123     57123     shaanxi        108.0669       34.2944          103       152     2012      01        23        023              0.261417      -2.596130       0.415455       0.184785   -9999.000000       0.080200       0.039700       0.048000
57123     57123     shaanxi        108.0669       34.2944          103       152     2012      01        24        024              0.257667      -3.269165       0.358855       0.173154   -9999.000000   -9999.000000   -9999.000000       0.084000
57123     57123     shaanxi        108.0669       34.2944          103       152     2012      01        25        025              0.247583      -4.039642       1.162104       0.174082   -9999.000000   -9999.000000   -9999.000000       0.008000
57123     57123     shaanxi        108.0669       34.2944          103       152     2012      01        26        026              0.238375      -3.596741       0.251111       0.177744   -9999.000000   -9999.000000       0.019700       0.084000
57123     57123     shaanxi        108.0669       34.2944          103       152     2012      01        27        027              0.237625      -2.542450       0.183949       0.182995       0.099000   -9999.000000       0.027500   -9999.000000
57123     57123     shaanxi        108.0669       34.2944          103       152     2012      01        28        028              0.255250      -0.472351       0.000000       0.213739   -9999.000000       0.114500       0.034900       0.101000
57123     57123     shaanxi        108.0669       34.2944          103       152     2012      01        29        029              0.275000       0.979218       0.228253       0.238650   -9999.000000   -9999.000000       0.037000       0.211000
57123     57123     shaanxi        108.0669       34.2944          103       152     2012      01        30        030              0.295958       1.172546       0.642968       0.247208   -9999.000000   -9999.000000   -9999.000000       0.257000
57123     57123     shaanxi        108.0669       34.2944          103       152     2012      01        31        031              0.308167       1.462463       0.842289       0.249273   -9999.000000   -9999.000000       0.050900       0.328000
57123     57123     shaanxi        108.0669       34.2944          103       152     2012      02        01        032              0.310708       2.742950       0.307466       0.270685   -9999.000000   -9999.000000       0.037700   -9999.000000
57123     57123     shaanxi        108.0669       34.2944          103       152     2012      02        02        033              0.304875       2.034882       0.082279       0.262912   -9999.000000   -9999.000000       0.050000       0.103000
57123     57123     shaanxi        108.0669       34.2944          103       152     2012      02        03        034              0.299167       0.563080       9.106117       0.236137   -9999.000000   -9999.000000       0.065100   -9999.000000
57123     57123     shaanxi        108.0669       34.2944          103       152     2012      02        04        035              0.298333       1.667908       0.191445       0.251117   -9999.000000   -9999.000000       0.067800       0.425000
57123     57123     shaanxi        108.0669       34.2944          103       152     2012      02        05        036              0.295542       2.070679       0.101825       0.261037   -9999.000000   -9999.000000   -9999.000000       0.086000
57123     57123     shaanxi        108.0669       34.2944          103       152     2012      02        06        037              0.291792       3.250854       0.000000       0.279055       0.103000   -9999.000000       0.054000   -9999.000000
57123     57123     shaanxi        108.0669       34.2944          103       152     2012      02        07        038              0.281875       3.239838       0.000000       0.268697   -9999.000000   -9999.000000       0.056000       0.056000
57123     57123     shaanxi        108.0669       34.2944          103       152     2012      02        08        039              0.275125       0.500366       0.000000       0.233456   -9999.000000   -9999.000000       0.058100   -9999.000000
57123     57123     shaanxi        108.0669       34.2944          103       152     2012      02        09        040              0.269042       0.289825       0.000000       0.224977   -9999.000000   -9999.000000       0.062300       0.161000
57123     57123     shaanxi        108.0669       34.2944          103       152     2012      02        10        041              0.270792       0.645966       0.000000       0.232071   -9999.000000   -9999.000000   -9999.000000   -9999.000000
57123     57123     shaanxi        108.0669       34.2944          103       152     2012      02        11        042              0.268958       1.392212       0.000000       0.240180       0.098000   -9999.000000   -9999.000000   -9999.000000
57123     57123     shaanxi        108.0669       34.2944          103       152     2012      02        12        043              0.271042       2.045349       0.000000       0.248191   -9999.000000   -9999.000000   -9999.000000       0.193000
57123     57123     shaanxi        108.0669       34.2944          103       152     2012      02        13        044              0.270083       3.103302       0.000000       0.268803   -9999.000000   -9999.000000       0.055500   -9999.000000
57123     57123     shaanxi        108.0669       34.2944          103       152     2012      02        14        045              0.269458       2.803253       0.000000       0.270414   -9999.000000   -9999.000000   -9999.000000       0.196000
57123     57123     shaanxi        108.0669       34.2944          103       152     2012      02        15        046              0.267708       4.679993       0.041923       0.283459   -9999.000000   -9999.000000       0.074800   -9999.000000
57123     57123     shaanxi        108.0669       34.2944          103       152     2012      02        16        047              0.266542       3.275024       0.000000       0.285115       0.104000   -9999.000000   -9999.000000   -9999.000000
57123     57123     shaanxi        108.0669       34.2944          103       152     2012      02        17        048              0.263958       3.710510       0.000000       0.274982       0.110000   -9999.000000       0.065000       0.179000
57123     57123     shaanxi        108.0669       34.2944          103       152     2012      02        18        049              0.262083       2.246704       0.000000       0.261644       0.115000   -9999.000000       0.048800   -9999.000000
57123     57123     shaanxi        108.0669       34.2944          103       152     2012      02        19        050              0.260667       2.621552       0.000000       0.255569       0.113000   -9999.000000       0.065400       0.187000
57123     57123     shaanxi        108.0669       34.2944          103       152     2012      02        20        051              0.259917       3.820862       0.000000       0.268191   -9999.000000   -9999.000000       0.063300   -9999.000000
57123     57123     shaanxi        108.0669       34.2944          103       152     2012      02        21        052              0.259000       4.415009       0.000000       0.276414   -9999.000000   -9999.000000   -9999.000000       0.153000
57123     57123     shaanxi        108.0669       34.2944          103       152     2012      02        22        053              0.258958       5.093689       0.000000       0.280180       0.087000   -9999.000000   -9999.000000       0.285000
57123     57123     shaanxi        108.0669       34.2944          103       152     2012      02        23        054              0.257250       6.132233       0.000000       0.283813       0.099500   -9999.000000       0.057300   -9999.000000
57123     57123     shaanxi        108.0669       34.2944          103       152     2012      02        24        055              0.256542       4.354401       0.000000       0.283979       0.096000   -9999.000000       0.057100       0.131000
57123     57123     shaanxi        108.0669       34.2944          103       152     2012      02        25        056              0.254500       4.608978       0.000000       0.282001   -9999.000000   -9999.000000       0.064100   -9999.000000
57123     57123     shaanxi        108.0669       34.2944          103       152     2012      02        26        057              0.255417       2.500031       0.390159       0.273616   -9999.000000   -9999.000000       0.065300       0.075000
57123     57123     shaanxi        108.0669       34.2944          103       152     2012      02        27        058              0.254667       2.532074       0.167011       0.270422       0.091000   -9999.000000   -9999.000000       0.237000
57123     57123     shaanxi        108.0669       34.2944          103       152     2012      02        28        059              0.255125       2.123138       0.000000       0.262510       0.089000       0.067200   -9999.000000       0.267000
57123     57123     shaanxi        108.0669       34.2944          103       152     2012      02        29        060              0.000000   -9999.000000       0.417373   -9999.000000       0.098000   -9999.000000   -9999.000000   -9999.000000
57123     57123     shaanxi        108.0669       34.2944          103       152     2012      03        01        061              0.259792       2.903076       0.152302       0.275440   -9999.000000   -9999.000000       0.054700   -9999.000000
57123     57123     shaanxi        108.0669       34.2944          103       152     2012      03        02        062              0.261083       3.882782       0.000000       0.286143   -9999.000000   -9999.000000       0.055400       0.436000
57123     57123     shaanxi        108.0669       34.2944          103       152     2012      03        03        063              0.260833       3.184479       0.000000       0.285799   -9999.000000   -9999.000000       0.058000   -9999.000000
57123     57123     shaanxi        108.0669       34.2944          103       152     2012      03        04        064              0.260208       2.745331       0.000000       0.282547   -9999.000000   -9999.000000   -9999.000000       0.262000
57123     57123     shaanxi        108.0669       34.2944          103       152     2012      03        05        065              0.260375       2.605042       0.000000       0.280103       0.128000   -9999.000000       0.058400       0.025000
57123     57123     shaanxi        108.0669       34.2944          103       152     2012      03        06        066              0.259292       4.829193       0.000000       0.284341       0.119000   -9999.000000       0.047700   -9999.000000
57123     57123     shaanxi        108.0669       34.2944          103       152     2012      03        07        067              0.000000       5.135590       0.449687       0.282655   -9999.000000   -9999.000000       0.066600       0.188000
57123     57123     shaanxi        108.0669       34.2944          103       152     2012      03        08        068              0.260000       5.379883       0.413288       0.283181   -9999.000000   -9999.000000       0.074700   -9999.000000
57123     57123     shaanxi        108.0669       34.2944          103       152     2012      03        09        069              0.264042       4.087128       0.000000       0.287646       0.121000   -9999.000000       0.069000       0.240000
57123     57123     shaanxi        108.0669       34.2944          103       152     2012      03        10        070              0.265042       5.399078       0.324812       0.285760       0.123000   -9999.000000   -9999.000000   -9999.000000
57123     57123     shaanxi        108.0669       34.2944          103       152     2012      03        11        071              0.263667       9.120544       0.000000       0.282568       0.108000   -9999.000000       0.056000   -9999.000000
57123     57123     shaanxi        108.0669       34.2944          103       152     2012      03        12        072              0.261583       8.518219       0.000000       0.278522   -9999.000000   -9999.000000       0.070900       0.174000
57123     57123     shaanxi        108.0669       34.2944          103       152     2012      03        13        073              0.260917       8.336731       0.000000       0.276766       0.096000   -9999.000000       0.068200   -9999.000000
57123     57123     shaanxi        108.0669       34.2944          103       152     2012      03        14        074              0.259708      10.717316       0.000000       0.273534       0.099000   -9999.000000   -9999.000000       0.172000
57123     57123     shaanxi        108.0669       34.2944          103       152     2012      03        15        075              0.258083      10.951935       0.000000       0.272383       0.113000   -9999.000000   -9999.000000   -9999.000000
57123     57123     shaanxi        108.0669       34.2944          103       152     2012      03        16        076              0.260826       7.286713       0.000000       0.275986       0.099000   -9999.000000   -9999.000000   -9999.000000
57123     57123     shaanxi        108.0669       34.2944          103       152     2012      03        17        077              0.261167      11.255829       0.000000       0.273206   -9999.000000       0.118400       0.054600       0.267000
57123     57123     shaanxi        108.0669       34.2944          103       152     2012      03        18        078              0.260208      13.711700       0.977831       0.268583       0.099000   -9999.000000       0.073200   -9999.000000
57123     57123     shaanxi        108.0669       34.2944          103       152     2012      03        19        079              0.255000      14.283325       0.000000       0.263497       0.096500   -9999.000000       0.093700       0.074000
57123     57123     shaanxi        108.0669       34.2944          103       152     2012      03        20        080              0.252417       8.859772       0.000000       0.265190       0.095500   -9999.000000       0.102400   -9999.000000
57123     57123     shaanxi        108.0669       34.2944          103       152     2012      03        21        081              0.249167       7.972107       0.283102       0.267362       0.159000   -9999.000000   -9999.000000       0.078000
57123     57123     shaanxi        108.0669       34.2944          103       152     2012      03        22        082              0.248375       6.012177       0.287886       0.271815   -9999.000000   -9999.000000       0.094900       0.354000
57123     57123     shaanxi        108.0669       34.2944          103       152     2012      03        23        083              0.248875       6.983093       0.000000       0.272248   -9999.000000   -9999.000000       0.077200       0.310000
57123     57123     shaanxi        108.0669       34.2944          103       152     2012      03        24        084              0.247583       9.893555       0.000000       0.262990       0.123500   -9999.000000       0.092300       0.009000
57123     57123     shaanxi        108.0669       34.2944          103       152     2012      03        25        085              0.000000      12.401672       0.000000       0.256238       0.117500   -9999.000000       0.098900   -9999.000000
57123     57123     shaanxi        108.0669       34.2944          103       152     2012      03        26        086              0.245833      14.099548       0.000000       0.250559       0.124000   -9999.000000   -9999.000000       0.140000
57123     57123     shaanxi        108.0669       34.2944          103       152     2012      03        27        087              0.244333      15.295166       0.216835       0.245138       0.123000   -9999.000000   -9999.000000       0.211000
57123     57123     shaanxi        108.0669       34.2944          103       152     2012      03        28        088              0.241125      16.015656       0.662683       0.242848       0.151000   -9999.000000       0.132600       0.343000
57123     57123     shaanxi        108.0669       34.2944          103       152     2012      03        29        089              0.244625      11.971497       0.000000       0.254412       0.138000   -9999.000000       0.132900       0.027000
57123     57123     shaanxi        108.0669       34.2944          103       152     2012      03        30        090              0.241458      16.591309       1.258785       0.248166       0.124000   -9999.000000       0.120000   -9999.000000
57123     57123     shaanxi        108.0669       34.2944          103       152     2012      03        31        091              0.239750      14.069214       0.365479       0.241118       0.129000   -9999.000000       0.128600       0.012000
57123     57123     shaanxi        108.0669       34.2944          103       152     2012      04        01        092              0.238083      16.300476       0.000000       0.232546       0.157000   -9999.000000   -9999.000000   -9999.000000
57123     57123     shaanxi        108.0669       34.2944          103       152     2012      04        02        093              0.233125      17.769470       0.204242       0.228156       0.142000   -9999.000000       0.111900       0.187000
57123     57123     shaanxi        108.0669       34.2944          103       152     2012      04        03        094              0.231083      15.312683       0.000000       0.224430       0.135000   -9999.000000       0.085300       0.012000
57123     57123     shaanxi        108.0669       34.2944          103       152     2012      04        04        095              0.230125      15.806488       0.000000       0.219012       0.131000   -9999.000000       0.105400   -9999.000000
57123     57123     shaanxi        108.0669       34.2944          103       152     2012      04        05        096              0.226375      18.592529       0.000000       0.212278       0.137000   -9999.000000       0.106900       0.031000
57123     57123     shaanxi        108.0669       34.2944          103       152     2012      04        06        097              0.223958      16.984772       0.000000       0.208508       0.143000   -9999.000000       0.106200   -9999.000000
57123     57123     shaanxi        108.0669       34.2944          103       152     2012      04        07        098              0.221750      17.419769       0.000000       0.206264   -9999.000000   -9999.000000   -9999.000000       0.032000
57123     57123     shaanxi        108.0669       34.2944          103       152     2012      04        08        099              0.219625      18.959015       0.156296       0.201961       0.148000   -9999.000000       0.099100   -9999.000000
57123     57123     shaanxi        108.0669       34.2944          103       152     2012      04        09        100              0.216042      20.801666       0.090255       0.197435       0.149500       0.027500       0.140400   -9999.000000
57123     57123     shaanxi        108.0669       34.2944          103       152     2012      04        10        101              0.217000      18.290649       0.000000       0.199304       0.130000   -9999.000000       0.148000       0.149000
57123     57123     shaanxi        108.0669       34.2944          103       152     2012      04        11        102              0.215625      21.041229       3.657794       0.195807       0.180000   -9999.000000       0.154400   -9999.000000
57123     57123     shaanxi        108.0669       34.2944          103       152     2012      04        12        103              0.213458      19.187408       1.925212       0.203964   -9999.000000   -9999.000000   -9999.000000       0.169000
57123     57123     shaanxi        108.0669       34.2944          103       152     2012      04        13        104              0.215958      14.101776       0.000000       0.234399       0.185000   -9999.000000   -9999.000000   -9999.000000
57123     57123     shaanxi        108.0669       34.2944          103       152     2012      04        14        105              0.214208      17.821136       0.000000       0.217226       0.160000   -9999.000000       0.134700   -9999.000000
57123     57123     shaanxi        108.0669       34.2944          103       152     2012      04        15        106              0.213083      18.587585       0.000000       0.208365       0.150500   -9999.000000       0.149800       0.139000
57123     57123     shaanxi        108.0669       34.2944          103       152     2012      04        16        107              0.211583      21.072113       1.674685       0.198813       0.181000   -9999.000000       0.157900   -9999.000000
57123     57123     shaanxi        108.0669       34.2944          103       152     2012      04        17        108              0.207500      22.102020       0.000000       0.205662       0.181000   -9999.000000       0.173900       0.098000
57123     57123     shaanxi        108.0669       34.2944          103       152     2012      04        18        109              0.208458      18.472565       0.207512       0.212979       0.163000   -9999.000000   -9999.000000   -9999.000000
57123     57123     shaanxi        108.0669       34.2944          103       152     2012      04        19        110              0.204542      21.516510       2.064647       0.201130       0.185000   -9999.000000       0.172500       0.031000
57123     57123     shaanxi        108.0669       34.2944          103       152     2012      04        20        111              0.205708      17.831970       0.000000       0.218225       0.153000   -9999.000000       0.130400       0.034000
57123     57123     shaanxi        108.0669       34.2944          103       152     2012      04        21        112              0.205208      20.434814       0.393164       0.211219       0.223500   -9999.000000       0.169700       0.195000
57123     57123     shaanxi        108.0669       34.2944          103       152     2012      04        22        113              0.203917      22.980072       0.000000       0.194555       0.193000   -9999.000000   -9999.000000       0.074000
57123     57123     shaanxi        108.0669       34.2944          103       152     2012      04        23        114              0.207875      24.263824       0.920605       0.184816       0.215000   -9999.000000       0.178700   -9999.000000
57123     57123     shaanxi        108.0669       34.2944          103       152     2012      04        24        115              0.222625      22.029297       0.000000       0.188287       0.239000       0.260100   -9999.000000       0.229000
57123     57123     shaanxi        108.0669       34.2944          103       152     2012      04        25        116              0.000000      20.353058       0.000000       0.188933       0.191500   -9999.000000       0.174200       0.017000
57123     57123     shaanxi        108.0669       34.2944          103       152     2012      04        26        117              0.221583      21.054108       0.000000       0.178621       0.195000   -9999.000000       0.167200       0.130000
57123     57123     shaanxi        108.0669       34.2944          103       152     2012      04        27        118              0.221042      24.414307       0.000000       0.173600       0.206000       0.082400       0.171200       0.082000
57123     57123     shaanxi        108.0669       34.2944          103       152     2012      04        28        119              0.224583      26.441101       6.163574       0.171299   -9999.000000   -9999.000000       0.177800   -9999.000000
57123     57123     shaanxi        108.0669       34.2944          103       152     2012      04        29        120              0.232708      25.902466       0.000000       0.219990       0.215000   -9999.000000   -9999.000000       0.073000
57123     57123     shaanxi        108.0669       34.2944          103       152     2012      04        30        121              0.230875      24.374481       0.000000       0.227293       0.249000   -9999.000000   -9999.000000   -9999.000000
57123     57123     shaanxi        108.0669       34.2944          103       152     2012      05        01        122              0.238292      21.387970       0.000000       0.211466       0.259500   -9999.000000       0.173100       0.344000
57123     57123     shaanxi        108.0669       34.2944          103       152     2012      05        02        123              0.242750      20.003937       2.777282       0.206383   -9999.000000       0.185600       0.194300       0.481000
57123     57123     shaanxi        108.0669       34.2944          103       152     2012      05        03        124              0.250292      19.493500       1.911906       0.230401       0.236000   -9999.000000       0.182700   -9999.000000
57123     57123     shaanxi        108.0669       34.2944          103       152     2012      05        04        125              0.250000      20.691925       0.000000       0.228407       0.247000   -9999.000000       0.174500       0.302000
57123     57123     shaanxi        108.0669       34.2944          103       152     2012      05        05        126              0.249417      23.207153       0.000000       0.212147       0.204000   -9999.000000   -9999.000000   -9999.000000
57123     57123     shaanxi        108.0669       34.2944          103       152     2012      05        06        127              0.245750      25.889740       0.000000       0.193605       0.224500   -9999.000000       0.178700       0.092000
57123     57123     shaanxi        108.0669       34.2944          103       152     2012      05        07        128              0.242208      25.162476       0.299160       0.184195   -9999.000000       0.215300       0.129800   -9999.000000
57123     57123     shaanxi        108.0669       34.2944          103       152     2012      05        08        129              0.242208      25.206604       2.366770       0.181000       0.215000   -9999.000000       0.153300   -9999.000000
57123     57123     shaanxi        108.0669       34.2944          103       152     2012      05        09        130              0.236958      28.709259       3.078994       0.173415   -9999.000000   -9999.000000       0.151000       0.322000
57123     57123     shaanxi        108.0669       34.2944          103       152     2012      05        10        131              0.246583      27.326538      17.215368       0.171265   -9999.000000   -9999.000000       0.151700   -9999.000000
57123     57123     shaanxi        108.0669       34.2944          103       152     2012      05        11        132              0.313917      28.129913       0.610407       0.214845       0.268500   -9999.000000   -9999.000000       0.588000
57123     57123     shaanxi        108.0669       34.2944          103       152     2012      05        12        133              0.289708      22.240448       0.000000       0.292743       0.264000   -9999.000000       0.153200   -9999.000000
57123     57123     shaanxi        108.0669       34.2944          103       152     2012      05        13        134              0.276083      20.468018       0.826645       0.256516   -9999.000000   -9999.000000       0.163600   -9999.000000
57123     57123     shaanxi        108.0669       34.2944          103       152     2012      05        14        135              0.271917      18.491882       0.000000       0.248050   -9999.000000   -9999.000000       0.170100       0.347000
57123     57123     shaanxi        108.0669       34.2944          103       152     2012      05        15        136              0.260167      22.058105       0.000000       0.229565       0.244000   -9999.000000       0.172200   -9999.000000
57123     57123     shaanxi        108.0669       34.2944          103       152     2012      05        16        137              0.251667      23.275146       0.000000       0.210343       0.218000   -9999.000000   -9999.000000       0.386000
57123     57123     shaanxi        108.0669       34.2944          103       152     2012      05        17        138              0.245125      25.015228       0.530139       0.195234       0.217000   -9999.000000   -9999.000000   -9999.000000
57123     57123     shaanxi        108.0669       34.2944          103       152     2012      05        18        139              0.240875      25.703186       0.000000       0.185125       0.221000   -9999.000000       0.146800       0.284000
57123     57123     shaanxi        108.0669       34.2944          103       152     2012      05        19        140              0.237167      27.645538       0.382145       0.177986   -9999.000000   -9999.000000       0.169400       0.386000
57123     57123     shaanxi        108.0669       34.2944          103       152     2012      05        20        141              0.232583      29.024323       1.877912       0.175550   -9999.000000   -9999.000000       0.164000       0.474000
57123     57123     shaanxi        108.0669       34.2944          103       152     2012      05        21        142              0.313333      27.813049      23.648399       0.178054       0.340500   -9999.000000       0.207900       0.779000
57123     57123     shaanxi        108.0669       34.2944          103       152     2012      05        22        143              0.319708      19.937866       0.541936       0.332350       0.291500   -9999.000000   -9999.000000   -9999.000000
57123     57123     shaanxi        108.0669       34.2944          103       152     2012      05        23        144              0.311583      20.618958       0.000000       0.296215   -9999.000000   -9999.000000       0.188700       0.690000
57123     57123     shaanxi        108.0669       34.2944          103       152     2012      05        24        145              0.305750      19.993774       0.244624       0.279325       0.302000   -9999.000000       0.157700       0.459000
57123     57123     shaanxi        108.0669       34.2944          103       152     2012      05        25        146              0.000000      19.339386       0.000000       0.270008       0.281000       0.160400       0.175000       0.636000
57123     57123     shaanxi        108.0669       34.2944          103       152     2012      05        26        147              0.291417      22.368469       0.601470       0.255287       0.223000   -9999.000000       0.172300       0.474000
57123     57123     shaanxi        108.0669       34.2944          103       152     2012      05        27        148              0.280792      25.334747       0.000000       0.238299       0.235000   -9999.000000       0.160300   -9999.000000
57123     57123     shaanxi        108.0669       34.2944          103       152     2012      05        28        149              0.298500      26.934082      21.318573       0.224950       0.331000   -9999.000000   -9999.000000       0.867000
57123     57123     shaanxi        108.0669       34.2944          103       152     2012      05        29        150              0.316708      21.027893       0.000000       0.301984       0.270000   -9999.000000       0.170600   -9999.000000
57123     57123     shaanxi        108.0669       34.2944          103       152     2012      05        30        151              0.301958      23.475861       0.000000       0.298134       0.265000   -9999.000000       0.173400   -9999.000000
57123     57123     shaanxi        108.0669       34.2944          103       152     2012      05        31        152              0.290958      25.065186       0.000000       0.274294       0.267000   -9999.000000       0.169900   -9999.000000
57123     57123     shaanxi        108.0669       34.2944          103       152     2012      06        01        153              0.282667      22.996735       0.000000       0.267356       0.173500   -9999.000000       0.160900   -9999.000000
57123     57123     shaanxi        108.0669       34.2944          103       152     2012      06        02        154              0.272417      25.772736       0.863969       0.249317       0.194000       0.161800   -9999.000000       0.473000
57123     57123     shaanxi        108.0669       34.2944          103       152     2012      06        03        155              0.267833      25.987183       0.156636       0.235981       0.185000   -9999.000000   -9999.000000   -9999.000000
57123     57123     shaanxi        108.0669       34.2944          103       152     2012      06        04        156              0.267250      24.698883       0.000000       0.229940   -9999.000000   -9999.000000       0.108400       0.686000
57123     57123     shaanxi        108.0669       34.2944          103       152     2012      06        05        157              0.260708      26.544434       1.044963       0.218614       0.203000   -9999.000000       0.132400   -9999.000000
57123     57123     shaanxi        108.0669       34.2944          103       152     2012      06        06        158              0.263208      22.894287       0.000000       0.229128       0.176500   -9999.000000       0.127700   -9999.000000
57123     57123     shaanxi        108.0669       34.2944          103       152     2012      06        07        159              0.259833      26.037964       0.000000       0.216546       0.179500   -9999.000000       0.127700       0.489000
57123     57123     shaanxi        108.0669       34.2944          103       152     2012      06        08        160              0.252958      28.135529       0.000000       0.200737       0.209000   -9999.000000   -9999.000000   -9999.000000
57123     57123     shaanxi        108.0669       34.2944          103       152     2012      06        09        161              0.250250      26.577057       0.000000       0.191960   -9999.000000   -9999.000000       0.122400       0.507000
57123     57123     shaanxi        108.0669       34.2944          103       152     2012      06        10        162              0.245417      30.329102       1.317277       0.181352       0.177000   -9999.000000       0.107600   -9999.000000
57123     57123     shaanxi        108.0669       34.2944          103       152     2012      06        11        163              0.000000      30.961456       0.000000       0.184216       0.140000       0.275400       0.115100   -9999.000000
57123     57123     shaanxi        108.0669       34.2944          103       152     2012      06        12        164              0.247667      29.723358       0.000000       0.177855       0.153500   -9999.000000       0.117300       0.458000
57123     57123     shaanxi        108.0669       34.2944          103       152     2012      06        13        165              0.243625      31.591522       0.000000       0.171111       0.191000   -9999.000000       0.116300   -9999.000000
57123     57123     shaanxi        108.0669       34.2944          103       152     2012      06        14        166              0.237524      33.644226       0.232786       0.168348       0.181000   -9999.000000   -9999.000000       0.371000
57123     57123     shaanxi        108.0669       34.2944          103       152     2012      06        15        167              0.231542      30.812836       0.000000       0.167133       0.175000   -9999.000000       0.106900   -9999.000000
57123     57123     shaanxi        108.0669       34.2944          103       152     2012      06        16        168              0.227208      30.694519       0.000000       0.165726       0.178000   -9999.000000       0.119800       0.328000
57123     57123     shaanxi        108.0669       34.2944          103       152     2012      06        17        169              0.223042      31.863892       0.000000       0.164705       0.161500   -9999.000000       0.114000       0.567000
57123     57123     shaanxi        108.0669       34.2944          103       152     2012      06        18        170              0.218458      32.484772       0.000000       0.164160       0.178500   -9999.000000       0.093900       0.400000
57123     57123     shaanxi        108.0669       34.2944          103       152     2012      06        19        171              0.218333      32.291656       0.393302       0.163464       0.189000   -9999.000000   -9999.000000       0.488000
57123     57123     shaanxi        108.0669       34.2944          103       152     2012      06        20        172              0.218083      31.575287       0.000000       0.163325       0.174000   -9999.000000   -9999.000000   -9999.000000
57123     57123     shaanxi        108.0669       34.2944          103       152     2012      06        21        173              0.216333      33.217133       1.944375       0.162089       0.170000   -9999.000000       0.074200       0.554000
57123     57123     shaanxi        108.0669       34.2944          103       152     2012      06        22        174              0.214375      34.684937       0.545784       0.161003       0.142500   -9999.000000       0.090900       0.478000
57123     57123     shaanxi        108.0669       34.2944          103       152     2012      06        23        175              0.212042      35.026825       1.562801       0.160079       0.153000   -9999.000000       0.092800       0.427000
57123     57123     shaanxi        108.0669       34.2944          103       152     2012      06        24        176              0.209208      35.490143       0.865587       0.159242       0.155000   -9999.000000       0.095000       0.498000
57123     57123     shaanxi        108.0669       34.2944          103       152     2012      06        25        177              0.207125      33.231781       1.846821       0.161507   -9999.000000   -9999.000000   -9999.000000   -9999.000000
57123     57123     shaanxi        108.0669       34.2944          103       152     2012      06        26        178              0.207208      27.995972       0.771284       0.189167       0.176000   -9999.000000       0.092900       0.669000
57123     57123     shaanxi        108.0669       34.2944          103       152     2012      06        27        179              0.210000      26.789978       0.000000       0.183576       0.165000   -9999.000000       0.086800   -9999.000000
57123     57123     shaanxi        108.0669       34.2944          103       152     2012      06        28        180              0.208167      28.240936       3.376541       0.177661       0.179000   -9999.000000       0.098200       0.819000
57123     57123     shaanxi        108.0669       34.2944          103       152     2012      06        29        181              0.316833      26.540039      20.302605       0.189974       0.210000   -9999.000000       0.102200   -9999.000000
57123     57123     shaanxi        108.0669       34.2944          103       152     2012      06        30        182              0.312208      24.363556       0.000000       0.318297   -9999.000000       0.133200   -9999.000000   -9999.000000
57123     57123     shaanxi        108.0669       34.2944          103       152     2012      07        01        183              0.289625      27.402832       0.000000       0.269374       0.172000   -9999.000000   -9999.000000       0.632000
57123     57123     shaanxi        108.0669       34.2944          103       152     2012      07        02        184              0.335500      28.867340      21.625462       0.245878       0.212000   -9999.000000       0.094100   -9999.000000
57123     57123     shaanxi        108.0669       34.2944          103       152     2012      07        03        185              0.320583      24.118042       1.405393       0.334381       0.198000   -9999.000000       0.090700       0.653000
57123     57123     shaanxi        108.0669       34.2944          103       152     2012      07        04        186              0.329917      28.551727       2.693533       0.292617       0.206000   -9999.000000       0.102100   -9999.000000
57123     57123     shaanxi        108.0669       34.2944          103       152     2012      07        05        187              0.314500      26.167267       0.000000       0.295019       0.181000   -9999.000000       0.098200   -9999.000000
57123     57123     shaanxi        108.0669       34.2944          103       152     2012      07        06        188              0.295250      28.974548       0.418775       0.266530   -9999.000000   -9999.000000   -9999.000000       0.715000
57123     57123     shaanxi        108.0669       34.2944          103       152     2012      07        07        189              0.288750      29.203033       4.712532       0.253062   -9999.000000       0.072800       0.089100   -9999.000000
57123     57123     shaanxi        108.0669       34.2944          103       152     2012      07        08        190              0.342333      27.959320      47.625408       0.261457       0.217000   -9999.000000       0.094800       1.000000
57123     57123     shaanxi        108.0669       34.2944          103       152     2012      07        09        191              0.338083      25.323273       2.524647       0.379215       0.227500   -9999.000000       0.115300   -9999.000000
57123     57123     shaanxi        108.0669       34.2944          103       152     2012      07        10        192              0.320750      24.705414       0.211902       0.347872       0.180000   -9999.000000       0.108800   -9999.000000
57123     57123     shaanxi        108.0669       34.2944          103       152     2012      07        11        193              0.299250      29.177429       0.429448       0.321030   -9999.000000   -9999.000000       0.100500       0.716000
57123     57123     shaanxi        108.0669       34.2944          103       152     2012      07        12        194              0.279500      29.232819       0.000000       0.308445       0.210000   -9999.000000   -9999.000000   -9999.000000
57123     57123     shaanxi        108.0669       34.2944          103       152     2012      07        13        195              0.265208      29.961914       2.717866       0.294392       0.225000   -9999.000000       0.098300       0.756000
57123     57123     shaanxi        108.0669       34.2944          103       152     2012      07        14        196              0.255750      29.133331       0.332049       0.293824       0.199500   -9999.000000       0.091400   -9999.000000
57123     57123     shaanxi        108.0669       34.2944          103       152     2012      07        15        197              0.250667      28.248260       0.000000       0.283275       0.220000   -9999.000000       0.100600       0.550000
57123     57123     shaanxi        108.0669       34.2944          103       152     2012      07        16        198              0.245917      28.561127       0.000000       0.273909       0.264000   -9999.000000       0.113400       0.622000
57123     57123     shaanxi        108.0669       34.2944          103       152     2012      07        17        199              0.241542      28.294708       0.000000       0.266123       0.208000   -9999.000000   -9999.000000       0.507000
57123     57123     shaanxi        108.0669       34.2944          103       152     2012      07        18        200              0.246125      27.721985       0.000000       0.257973       0.203000       0.073400   -9999.000000       0.562000
57123     57123     shaanxi        108.0669       34.2944          103       152     2012      07        19        201              0.236917      28.475372       0.000000       0.250136       0.197000   -9999.000000       0.089400   -9999.000000
57123     57123     shaanxi        108.0669       34.2944          103       152     2012      07        20        202              0.232870      29.186371       0.250330       0.241979       0.230000   -9999.000000       0.096600       0.642000
57123     57123     shaanxi        108.0669       34.2944          103       152     2012      07        21        203              0.235167      29.542816      13.684062       0.236494   -9999.000000   -9999.000000       0.114600       1.000000
57123     57123     shaanxi        108.0669       34.2944          103       152     2012      07        22        204              0.246458      25.595154       2.267677       0.309656       0.242000       0.194800       0.111800       0.755000
57123     57123     shaanxi        108.0669       34.2944          103       152     2012      07        23        205              0.239958      28.307770       3.652215       0.285443       0.243000   -9999.000000   -9999.000000       0.862000
57123     57123     shaanxi        108.0669       34.2944          103       152     2012      07        24        206              0.243958      25.450287       0.000000       0.291810       0.225000   -9999.000000       0.116700   -9999.000000
57123     57123     shaanxi        108.0669       34.2944          103       152     2012      07        25        207              0.240542      27.800537       0.000000       0.280316       0.213000   -9999.000000       0.091800       0.688000
57123     57123     shaanxi        108.0669       34.2944          103       152     2012      07        26        208              0.408792      29.059509       0.000000       0.267490       0.228000   -9999.000000       0.108300   -9999.000000
57123     57123     shaanxi        108.0669       34.2944          103       152     2012      07        27        209              0.251042      31.202515       0.000000       0.251138   -9999.000000   -9999.000000       0.106300       0.633000
57123     57123     shaanxi        108.0669       34.2944          103       152     2012      07        28        210              0.215875      32.083801       0.000000       0.233403       0.208000   -9999.000000       0.104600       0.485000
57123     57123     shaanxi        108.0669       34.2944          103       152     2012      07        29        211              0.206917      33.169159       0.000000       0.217036       0.201000   -9999.000000   -9999.000000   -9999.000000
57123     57123     shaanxi        108.0669       34.2944          103       152     2012      07        30        212              0.197958      34.583527       0.445289       0.203854       0.221000   -9999.000000       0.098400       0.568000
57123     57123     shaanxi        108.0669       34.2944          103       152     2012      07        31        213              0.193500      31.588135       0.000000       0.198660       0.237000   -9999.000000       0.098800   -9999.000000
57123     57123     shaanxi        108.0669       34.2944          103       152     2012      08        01        214              0.190792      29.537018       0.206616       0.195694       0.236000   -9999.000000       0.100700       0.631000
57123     57123     shaanxi        108.0669       34.2944          103       152     2012      08        02        215              0.190875      28.205750       0.592275       0.191950       0.246000       0.166000       0.103000   -9999.000000
57123     57123     shaanxi        108.0669       34.2944          103       152     2012      08        03        216              0.188708      30.875702       0.857710       0.188539       0.235000   -9999.000000   -9999.000000   -9999.000000
57123     57123     shaanxi        108.0669       34.2944          103       152     2012      08        04        217              0.185167      30.846344       0.000000       0.196425       0.216000   -9999.000000   -9999.000000       0.612000
57123     57123     shaanxi        108.0669       34.2944          103       152     2012      08        05        218              0.182500      30.928375       1.967119       0.185969       0.246000   -9999.000000       0.099800   -9999.000000
57123     57123     shaanxi        108.0669       34.2944          103       152     2012      08        06        219              0.180792      30.020020       6.707901       0.192992       0.256000   -9999.000000       0.108400       0.624000
57123     57123     shaanxi        108.0669       34.2944          103       152     2012      08        07        220              0.180583      29.623230       0.000000       0.198621   -9999.000000   -9999.000000       0.094500   -9999.000000
57123     57123     shaanxi        108.0669       34.2944          103       152     2012      08        08        221              0.178125      31.932007       1.435026       0.185629       0.255000   -9999.000000       0.103300   -9999.000000
57123     57123     shaanxi        108.0669       34.2944          103       152     2012      08        09        222              0.176375      31.865967       0.000000       0.188658       0.227000   -9999.000000   -9999.000000       0.692000
57123     57123     shaanxi        108.0669       34.2944          103       152     2012      08        10        223              0.173292      32.478516       0.000000       0.178513       0.224500       0.107500   -9999.000000   -9999.000000
57123     57123     shaanxi        108.0669       34.2944          103       152     2012      08        11        224              0.172333      30.949158       0.229001       0.172538       0.276000   -9999.000000       0.087900       0.644000
57123     57123     shaanxi        108.0669       34.2944          103       152     2012      08        12        225              0.174958      32.943390      11.055844       0.168201       0.246000   -9999.000000       0.108600   -9999.000000
57123     57123     shaanxi        108.0669       34.2944          103       152     2012      08        13        226              0.349958      31.707367      30.133924       0.206924       0.349000       0.134100       0.103800       1.000000
57123     57123     shaanxi        108.0669       34.2944          103       152     2012      08        14        227              0.349000      25.470398       5.330785       0.346762       0.346000   -9999.000000       0.096100       0.981000
57123     57123     shaanxi        108.0669       34.2944          103       152     2012      08        15        228              0.344083      25.409485       0.514118       0.328409       0.302000   -9999.000000   -9999.000000       0.850000
57123     57123     shaanxi        108.0669       34.2944          103       152     2012      08        16        229              0.336833      27.141022       0.000000       0.303260       0.319500   -9999.000000       0.089100       0.702000
57123     57123     shaanxi        108.0669       34.2944          103       152     2012      08        17        230              0.335125      28.021881      16.239904       0.289142       0.286000       0.184400       0.101300   -9999.000000
57123     57123     shaanxi        108.0669       34.2944          103       152     2012      08        18        231              0.346542      26.238953       2.664746       0.312288   -9999.000000       0.172200       0.092000       0.882000
57123     57123     shaanxi        108.0669       34.2944          103       152     2012      08        19        232              0.350292      23.838745      15.724652       0.331379       0.336000   -9999.000000       0.097000       0.922000
57123     57123     shaanxi        108.0669       34.2944          103       152     2012      08        20        233              0.344792      23.202545       0.460817       0.352937       0.324000   -9999.000000   -9999.000000       0.888000
57123     57123     shaanxi        108.0669       34.2944          103       152     2012      08        21        234              0.339333      23.536957       0.000000       0.328850       0.274500   -9999.000000   -9999.000000   -9999.000000
57123     57123     shaanxi        108.0669       34.2944          103       152     2012      08        22        235              0.328042      25.479980       0.000000       0.314124       0.252000   -9999.000000       0.093300   -9999.000000
57123     57123     shaanxi        108.0669       34.2944          103       152     2012      08        23        236              0.311792      25.548615       0.000000       0.301069   -9999.000000       0.168900       0.114300       0.725000
57123     57123     shaanxi        108.0669       34.2944          103       152     2012      08        24        237              0.296583      25.709991       0.000000       0.291091   -9999.000000   -9999.000000       0.106800   -9999.000000
57123     57123     shaanxi        108.0669       34.2944          103       152     2012      08        25        238              0.000000      25.789764       2.372503       0.281751       0.256000   -9999.000000       0.108900       0.701000
57123     57123     shaanxi        108.0669       34.2944          103       152     2012      08        26        239              0.284417      26.630951       0.000000       0.284402       0.245500   -9999.000000   -9999.000000       0.629000
57123     57123     shaanxi        108.0669       34.2944          103       152     2012      08        27        240              0.300750      26.373016       7.353683       0.280895       0.250000   -9999.000000       0.136300   -9999.000000
57123     57123     shaanxi        108.0669       34.2944          103       152     2012      08        28        241              0.332042      25.984100       0.000000       0.298479       0.199000       0.211900       0.112300       0.728000
57123     57123     shaanxi        108.0669       34.2944          103       152     2012      08        29        242              0.319125      26.939178       0.000000       0.290850       0.270000   -9999.000000       0.127000   -9999.000000
57123     57123     shaanxi        108.0669       34.2944          103       152     2012      08        30        243              0.317208      27.797333      19.119507       0.273303   -9999.000000   -9999.000000       0.130700       0.656000
57123     57123     shaanxi        108.0669       34.2944          103       152     2012      08        31        244              0.350917      27.041351      39.760147       0.294261   -9999.000000       0.123200   -9999.000000   -9999.000000
57123     57123     shaanxi        108.0669       34.2944          103       152     2012      09        01        245              0.350417      22.988831      27.206835       0.384894       0.262000   -9999.000000   -9999.000000   -9999.000000
57123     57123     shaanxi        108.0669       34.2944          103       152     2012      09        02        246              0.341042      20.509949       0.000000       0.386534       0.219000       0.131400       0.141300       0.774000
57123     57123     shaanxi        108.0669       34.2944          103       152     2012      09        03        247              0.333125      23.035980      22.055124       0.354383   -9999.000000   -9999.000000       0.140400   -9999.000000
57123     57123     shaanxi        108.0669       34.2944          103       152     2012      09        04        248              0.326542      24.137817       0.000000       0.341552       0.240000   -9999.000000       0.110200       0.712000
57123     57123     shaanxi        108.0669       34.2944          103       152     2012      09        05        249              0.319458      24.535797       0.000000       0.332705       0.209500       0.127100       0.129200   -9999.000000
57123     57123     shaanxi        108.0669       34.2944          103       152     2012      09        06        250              0.311875      25.820618       0.000000       0.326198       0.217000   -9999.000000   -9999.000000   -9999.000000
57123     57123     shaanxi        108.0669       34.2944          103       152     2012      09        07        251              0.331500      25.652740      50.812119       0.321135   -9999.000000       0.126600       0.165300       1.000000
57123     57123     shaanxi        108.0669       34.2944          103       152     2012      09        08        252              0.347667      22.727783       8.157003       0.374708       0.309000   -9999.000000       0.130400   -9999.000000
57123     57123     shaanxi        108.0669       34.2944          103       152     2012      09        09        253              0.343250      22.490143       0.630118       0.378682       0.271000   -9999.000000       0.139200       0.926000
57123     57123     shaanxi        108.0669       34.2944          103       152     2012      09        10        254              0.350208      23.018402      20.655693       0.361134       0.307000       0.165200       0.132200   -9999.000000
57123     57123     shaanxi        108.0669       34.2944          103       152     2012      09        11        255              0.343917      21.144623       4.979242       0.381816       0.227000   -9999.000000       0.125100       0.996000
57123     57123     shaanxi        108.0669       34.2944          103       152     2012      09        12        256              0.337833      23.091217       0.000000       0.359589       0.237000   -9999.000000   -9999.000000       0.740000
57123     57123     shaanxi        108.0669       34.2944          103       152     2012      09        13        257              0.330250      20.094482       0.000000       0.351633       0.196000   -9999.000000       0.108800       0.755000
57123     57123     shaanxi        108.0669       34.2944          103       152     2012      09        14        258              0.318708      20.278259       0.000000       0.345596   -9999.000000   -9999.000000       0.102400       0.586000
57123     57123     shaanxi        108.0669       34.2944          103       152     2012      09        15        259              0.310417      20.957733       1.088202       0.341191       0.264000       0.115800       0.125800   -9999.000000
57123     57123     shaanxi        108.0669       34.2944          103       152     2012      09        16        260              0.311625      20.407745       0.463439       0.341473       0.232000   -9999.000000       0.121400       0.908000
57123     57123     shaanxi        108.0669       34.2944          103       152     2012      09        17        261              0.307708      19.114960       0.000000       0.341475       0.223000   -9999.000000   -9999.000000       0.672000
57123     57123     shaanxi        108.0669       34.2944          103       152     2012      09        18        262              0.297750      21.362610       0.000000       0.336513       0.206000   -9999.000000   -9999.000000       0.690000
57123     57123     shaanxi        108.0669       34.2944          103       152     2012      09        19        263              0.286917      22.396912       0.000000       0.332388   -9999.000000   -9999.000000       0.107100       0.679000
57123     57123     shaanxi        108.0669       34.2944          103       152     2012      09        20        264              0.285000      22.972809       1.641243       0.328393       0.246000       0.092800       0.130200   -9999.000000
57123     57123     shaanxi        108.0669       34.2944          103       152     2012      09        21        265              0.287542      20.771393       0.000000       0.332373   -9999.000000   -9999.000000       0.110500       0.699000
57123     57123     shaanxi        108.0669       34.2944          103       152     2012      09        22        266              0.283875      22.524475       0.000000       0.328757       0.164500   -9999.000000       0.121400   -9999.000000
57123     57123     shaanxi        108.0669       34.2944          103       152     2012      09        23        267              0.281625      21.944763       0.000000       0.327086       0.173000       0.069900   -9999.000000       0.685000
57123     57123     shaanxi        108.0669       34.2944          103       152     2012      09        24        268              0.279750      22.457947       6.470377       0.325550       0.172000   -9999.000000       0.153200       0.693000
57123     57123     shaanxi        108.0669       34.2944          103       152     2012      09        25        269              0.313833      22.452484       9.175968       0.330802       0.201000       0.246300       0.124200   -9999.000000
57123     57123     shaanxi        108.0669       34.2944          103       152     2012      09        26        270              0.319667      19.152466       0.000000       0.357839       0.206000   -9999.000000       0.145300       0.778000
57123     57123     shaanxi        108.0669       34.2944          103       152     2012      09        27        271              0.316357      20.919830       0.000000       0.340432       0.164000   -9999.000000       0.129100   -9999.000000
57123     57123     shaanxi        108.0669       34.2944          103       152     2012      09        28        272              0.297133      20.772522       0.000000       0.333839       0.162000   -9999.000000       0.125800       0.637000
57123     57123     shaanxi        108.0669       34.2944          103       152     2012      09        29        273              0.288958      18.570831       2.206897       0.328053       0.166000   -9999.000000   -9999.000000   -9999.000000
57123     57123     shaanxi        108.0669       34.2944          103       152     2012      09        30        274              0.279292      19.254486       0.000000       0.326442   -9999.000000   -9999.000000       0.120100   -9999.000000
57123     57123     shaanxi        108.0669       34.2944          103       152     2012      10        01        275              0.270333      19.722839       0.000000       0.322922       0.144000   -9999.000000       0.099400       0.630000
57123     57123     shaanxi        108.0669       34.2944          103       152     2012      10        02        276              0.303625      20.162628      13.597243       0.320113       0.172000   -9999.000000       0.104700   -9999.000000
57123     57123     shaanxi        108.0669       34.2944          103       152     2012      10        03        277              0.325375      18.199707       0.404212       0.349428       0.154500       0.187000       0.107200       0.706000
57123     57123     shaanxi        108.0669       34.2944          103       152     2012      10        04        278              0.316292      20.771240       2.491766       0.339751       0.176000   -9999.000000   -9999.000000   -9999.000000
57123     57123     shaanxi        108.0669       34.2944          103       152     2012      10        05        279              0.309417      18.311005       0.000000       0.336128       0.156000   -9999.000000   -9999.000000   -9999.000000
57123     57123     shaanxi        108.0669       34.2944          103       152     2012      10        06        280              0.301750      19.649170       0.000000       0.331048       0.152000       0.115100       0.084400       0.775000
57123     57123     shaanxi        108.0669       34.2944          103       152     2012      10        07        281              0.298375      17.920013       0.000000       0.328756       0.159000   -9999.000000       0.106200   -9999.000000
57123     57123     shaanxi        108.0669       34.2944          103       152     2012      10        08        282              0.305750      17.910736       3.107746       0.327786       0.189000       0.037500       0.082700       0.896000
57123     57123     shaanxi        108.0669       34.2944          103       152     2012      10        09        283              0.304958      17.117065       0.000000       0.335529       0.160000   -9999.000000       0.078100   -9999.000000
57123     57123     shaanxi        108.0669       34.2944          103       152     2012      10        10        284              0.295208      18.427887       0.000000       0.328228       0.162000   -9999.000000   -9999.000000       0.626000
57123     57123     shaanxi        108.0669       34.2944          103       152     2012      10        11        285              0.290292      18.582031       0.154056       0.324480   -9999.000000       0.139600       0.075900       0.715000
57123     57123     shaanxi        108.0669       34.2944          103       152     2012      10        12        286              0.289708      16.989349       0.000000       0.324810       0.129000   -9999.000000       0.061200       0.609000
57123     57123     shaanxi        108.0669       34.2944          103       152     2012      10        13        287              0.283292      18.050446       0.000000       0.323843       0.106500   -9999.000000       0.075400       0.585000
57123     57123     shaanxi        108.0669       34.2944          103       152     2012      10        14        288              0.278042      19.339111       0.000000       0.320590       0.117500   -9999.000000       0.077500   -9999.000000
57123     57123     shaanxi        108.0669       34.2944          103       152     2012      10        15        289              0.275083      18.286072       2.046781       0.319574       0.131000   -9999.000000       0.077500       0.498000
57123     57123     shaanxi        108.0669       34.2944          103       152     2012      10        16        290              0.273750      16.665405       0.000000       0.323134   -9999.000000       0.101000   -9999.000000       0.622000
57123     57123     shaanxi        108.0669       34.2944          103       152     2012      10        17        291              0.265375      15.250916       0.233936       0.321212       0.120000   -9999.000000       0.072200       0.554000
57123     57123     shaanxi        108.0669       34.2944          103       152     2012      10        18        292              0.258333      14.880188       0.000000       0.317255       0.126000   -9999.000000       0.075100       0.507000
57123     57123     shaanxi        108.0669       34.2944          103       152     2012      10        19        293              0.256125      13.229095       0.000000       0.317782       0.117000   -9999.000000       0.071100   -9999.000000
57123     57123     shaanxi        108.0669       34.2944          103       152     2012      10        20        294              0.252708      15.667175       0.000000       0.315993       0.127000   -9999.000000       0.075000       0.617000
57123     57123     shaanxi        108.0669       34.2944          103       152     2012      10        21        295              0.246542      16.971344       0.743569       0.314297       0.161000       0.050600   -9999.000000   -9999.000000
57123     57123     shaanxi        108.0669       34.2944          103       152     2012      10        22        296              0.243833      13.212524       0.000000       0.314939   -9999.000000   -9999.000000   -9999.000000       0.614000
57123     57123     shaanxi        108.0669       34.2944          103       152     2012      10        23        297              0.239708      13.927887       1.880900       0.312284   -9999.000000   -9999.000000       0.067400       0.624000
57123     57123     shaanxi        108.0669       34.2944          103       152     2012      10        24        298              0.242750      11.011322       0.000000       0.319819   -9999.000000       0.240200       0.082300   -9999.000000
57123     57123     shaanxi        108.0669       34.2944          103       152     2012      10        25        299              0.000000      13.987061       0.000000       0.315224       0.147500   -9999.000000       0.076200       0.474000
57123     57123     shaanxi        108.0669       34.2944          103       152     2012      10        26        300              0.239333      14.750397       0.000000       0.312911       0.153000       0.088800       0.078300   -9999.000000
57123     57123     shaanxi        108.0669       34.2944          103       152     2012      10        27        301              0.233833      16.169220       0.000000       0.311031   -9999.000000   -9999.000000   -9999.000000       0.554000
57123     57123     shaanxi        108.0669       34.2944          103       152     2012      10        28        302              0.000000      15.122589       0.735355       0.309693       0.160000   -9999.000000       0.080400   -9999.000000
57123     57123     shaanxi        108.0669       34.2944          103       152     2012      10        29        303              0.232708      14.685150       0.762458       0.310607       0.149500       0.101000       0.077400   -9999.000000
57123     57123     shaanxi        108.0669       34.2944          103       152     2012      10        30        304              0.230542      14.540771       0.000000       0.315026       0.138000   -9999.000000       0.087900       0.512000
57123     57123     shaanxi        108.0669       34.2944          103       152     2012      10        31        305              0.227708      12.979401       0.000000       0.309877       0.152000       0.169900       0.084200   -9999.000000
57123     57123     shaanxi        108.0669       34.2944          103       152     2012      11        01        306              0.223833      12.575165       0.000000       0.307465       0.136000   -9999.000000   -9999.000000       0.462000
57123     57123     shaanxi        108.0669       34.2944          103       152     2012      11        02        307              0.222375      11.876129       0.229485       0.306736       0.137000   -9999.000000   -9999.000000   -9999.000000
57123     57123     shaanxi        108.0669       34.2944          103       152     2012      11        03        308              0.216375      12.796051       0.000000       0.305147   -9999.000000       0.010900       0.072600   -9999.000000
57123     57123     shaanxi        108.0669       34.2944          103       152     2012      11        04        309              0.213583       8.963379       0.000000       0.302521       0.130000   -9999.000000       0.086100       0.469000
57123     57123     shaanxi        108.0669       34.2944          103       152     2012      11        05        310              0.211542       8.121735       0.000000       0.301982       0.142000   -9999.000000       0.082800   -9999.000000
57123     57123     shaanxi        108.0669       34.2944          103       152     2012      11        06        311              0.211542       7.946594       0.270038       0.301318       0.148000   -9999.000000       0.091100       0.467000
57123     57123     shaanxi        108.0669       34.2944          103       152     2012      11        07        312              0.216667       9.300354       3.118323       0.302444   -9999.000000   -9999.000000   -9999.000000   -9999.000000
57123     57123     shaanxi        108.0669       34.2944          103       152     2012      11        08        313              0.221542       7.736755       0.120343       0.317940   -9999.000000       0.200000       0.097500       0.576000
57123     57123     shaanxi        108.0669       34.2944          103       152     2012      11        09        314              0.221833       9.548950       1.615831       0.309860       0.158000   -9999.000000       0.077500       0.614000
57123     57123     shaanxi        108.0669       34.2944          103       152     2012      11        10        315              0.220000       8.471741       0.138690       0.313154       0.140000   -9999.000000       0.088000       0.605000
57123     57123     shaanxi        108.0669       34.2944          103       152     2012      11        11        316              0.218542       6.719482       0.000000       0.312259       0.146000   -9999.000000       0.088100       0.320000
57123     57123     shaanxi        108.0669       34.2944          103       152     2012      11        12        317              0.218125       7.019012       0.000000       0.308456   -9999.000000   -9999.000000       0.079800   -9999.000000
57123     57123     shaanxi        108.0669       34.2944          103       152     2012      11        13        318              0.000000       8.481018       0.000000       0.307213   -9999.000000       0.053500   -9999.000000       0.360000
57123     57123     shaanxi        108.0669       34.2944          103       152     2012      11        14        319              0.213167       8.339264       0.000000       0.305504       0.142000   -9999.000000       0.077000       0.514000
57123     57123     shaanxi        108.0669       34.2944          103       152     2012      11        15        320              0.212042       7.774658       0.385954       0.304834       0.158000       0.088800       0.069600       0.411000
57123     57123     shaanxi        108.0669       34.2944          103       152     2012      11        16        321              0.214167       6.203430       0.000000       0.307621       0.153000       0.075300       0.072300       0.301000
57123     57123     shaanxi        108.0669       34.2944          103       152     2012      11        17        322              0.000000       7.955780       0.000000       0.305660       0.139000   -9999.000000       0.079500   -9999.000000
57123     57123     shaanxi        108.0669       34.2944          103       152     2012      11        18        323              0.212000       7.844574       0.000000       0.304119   -9999.000000       0.066000   -9999.000000       0.327000
57123     57123     shaanxi        108.0669       34.2944          103       152     2012      11        19        324              0.210333       8.780975       0.000000       0.302863       0.151000   -9999.000000   -9999.000000   -9999.000000
57123     57123     shaanxi        108.0669       34.2944          103       152     2012      11        20        325              0.208500       8.044861       0.000000       0.302736       0.142000   -9999.000000       0.079400       0.420000
57123     57123     shaanxi        108.0669       34.2944          103       152     2012      11        21        326              0.209042       7.205597       0.000000       0.303468       0.134000       0.091200       0.091300       0.300000
57123     57123     shaanxi        108.0669       34.2944          103       152     2012      11        22        327              0.206042       8.950470       0.000000       0.302802       0.145000   -9999.000000       0.082500   -9999.000000
57123     57123     shaanxi        108.0669       34.2944          103       152     2012      11        23        328              0.203333       7.251099       0.000000       0.301292   -9999.000000   -9999.000000       0.091500       0.306000
57123     57123     shaanxi        108.0669       34.2944          103       152     2012      11        24        329              0.203042       6.081146       2.424176       0.299896   -9999.000000   -9999.000000   -9999.000000   -9999.000000
57123     57123     shaanxi        108.0669       34.2944          103       152     2012      11        25        330              0.218250       5.384888       0.506863       0.304086   -9999.000000   -9999.000000       0.095800       0.499000
57123     57123     shaanxi        108.0669       34.2944          103       152     2012      11        26        331              0.218250       4.611145       0.000000       0.308550       0.128000       0.192100   -9999.000000   -9999.000000
57123     57123     shaanxi        108.0669       34.2944          103       152     2012      11        27        332              0.221667       4.506439       0.000000       0.300828       0.151000   -9999.000000       0.086000   -9999.000000
57123     57123     shaanxi        108.0669       34.2944          103       152     2012      11        28        333              0.218875       5.474670       0.000000       0.302421       0.134000   -9999.000000       0.089600       0.283000
57123     57123     shaanxi        108.0669       34.2944          103       152     2012      11        29        334              0.215167       3.419373       0.000000       0.292902   -9999.000000   -9999.000000       0.089400   -9999.000000
57123     57123     shaanxi        108.0669       34.2944          103       152     2012      11        30        335              0.213292       2.129761       0.092741       0.277713   -9999.000000   -9999.000000   -9999.000000       0.343000
57123     57123     shaanxi        108.0669       34.2944          103       152     2012      12        01        336              0.214250       2.417755       0.000000       0.290832       0.130000   -9999.000000       0.082400   -9999.000000
57123     57123     shaanxi        108.0669       34.2944          103       152     2012      12        02        337              0.212750       3.151489       0.000000       0.298793   -9999.000000   -9999.000000       0.087200       0.222000
57123     57123     shaanxi        108.0669       34.2944          103       152     2012      12        03        338              0.213250       2.547363       0.000000       0.296051       0.143000   -9999.000000       0.081300       0.379000
57123     57123     shaanxi        108.0669       34.2944          103       152     2012      12        04        339              0.214458       3.705353       0.000000       0.289067   -9999.000000       0.192700       0.088500   -9999.000000
57123     57123     shaanxi        108.0669       34.2944          103       152     2012      12        05        340              0.219583       4.676941       0.000000       0.295957   -9999.000000   -9999.000000   -9999.000000       0.242000
57123     57123     shaanxi        108.0669       34.2944          103       152     2012      12        06        341              0.219542       4.231262       0.000000       0.291178       0.132000       0.188700   -9999.000000   -9999.000000
57123     57123     shaanxi        108.0669       34.2944          103       152     2012      12        07        342              0.217750       4.823425       0.000000       0.295325       0.123000   -9999.000000       0.056100       0.293000
57123     57123     shaanxi        108.0669       34.2944          103       152     2012      12        08        343              0.213417       4.928680       0.000000       0.294924       0.138000   -9999.000000       0.083200       0.272000
57123     57123     shaanxi        108.0669       34.2944          103       152     2012      12        09        344              0.213167       2.704956       0.000000       0.272049   -9999.000000       0.104700       0.083400       0.304000
57123     57123     shaanxi        108.0669       34.2944          103       152     2012      12        10        345              0.212875       1.761597       0.000000       0.268897   -9999.000000   -9999.000000       0.081600       0.165000
57123     57123     shaanxi        108.0669       34.2944          103       152     2012      12        11        346              0.208292       2.581299       0.000000       0.270560   -9999.000000   -9999.000000   -9999.000000   -9999.000000
57123     57123     shaanxi        108.0669       34.2944          103       152     2012      12        12        347              0.206833       1.129089       0.000000       0.250769   -9999.000000   -9999.000000       0.084800       0.131000
57123     57123     shaanxi        108.0669       34.2944          103       152     2012      12        13        348              0.210000       0.859802       0.000000       0.246207   -9999.000000   -9999.000000       0.064700       0.299000
57123     57123     shaanxi        108.0669       34.2944          103       152     2012      12        14        349              0.210583       0.539154       0.000000       0.248428       0.130000       0.141100       0.082100       0.341000
57123     57123     shaanxi        108.0669       34.2944          103       152     2012      12        15        350              0.000000       1.681183       0.000000       0.274482   -9999.000000   -9999.000000       0.081600       0.258000
57123     57123     shaanxi        108.0669       34.2944          103       152     2012      12        16        351              0.209125       1.282166       0.000000       0.276144   -9999.000000   -9999.000000   -9999.000000   -9999.000000
57123     57123     shaanxi        108.0669       34.2944          103       152     2012      12        17        352              0.208750       2.010895       0.000000       0.286055   -9999.000000   -9999.000000   -9999.000000       0.175000
57123     57123     shaanxi        108.0669       34.2944          103       152     2012      12        18        353              0.206125       2.209106       0.000000       0.282181       0.133000   -9999.000000       0.071200   -9999.000000
57123     57123     shaanxi        108.0669       34.2944          103       152     2012      12        19        354              0.205375       1.909149       0.000000       0.259739   -9999.000000   -9999.000000       0.087600       0.219000
57123     57123     shaanxi        108.0669       34.2944          103       152     2012      12        20        355              0.000000       1.281342       0.369467       0.266107   -9999.000000   -9999.000000       0.084400       0.335000
57123     57123     shaanxi        108.0669       34.2944          103       152     2012      12        21        356              0.207000       0.961121       0.195900       0.262883   -9999.000000   -9999.000000       0.082800   -9999.000000
57123     57123     shaanxi        108.0669       34.2944          103       152     2012      12        22        357              0.202292       1.623169       0.286289       0.268197   -9999.000000   -9999.000000   -9999.000000       0.176000
57123     57123     shaanxi        108.0669       34.2944          103       152     2012      12        23        358              0.183417       0.528809       0.000000       0.244941   -9999.000000   -9999.000000       0.079900   -9999.000000
57123     57123     shaanxi        108.0669       34.2944          103       152     2012      12        24        359              0.172389      -2.043762       0.000000       0.190140       0.111000   -9999.000000       0.051500       0.057000
57123     57123     shaanxi        108.0669       34.2944          103       152     2012      12        25        360              0.176125      -1.632751       0.000000       0.196339   -9999.000000   -9999.000000       0.082100   -9999.000000
57123     57123     shaanxi        108.0669       34.2944          103       152     2012      12        26        361              0.000000      -0.690582       0.000000       0.208793   -9999.000000   -9999.000000       0.082900   -9999.000000
57123     57123     shaanxi        108.0669       34.2944          103       152     2012      12        27        362              0.170500      -1.819794       0.000000       0.192275   -9999.000000       0.230200       0.083200       0.101000
57123     57123     shaanxi        108.0669       34.2944          103       152     2012      12        28        363              0.000000      -1.477051       0.000000       0.195187   -9999.000000   -9999.000000   -9999.000000   -9999.000000
57123     57123     shaanxi        108.0669       34.2944          103       152     2012      12        29        364              0.000000      -0.526886       0.000000       0.212132   -9999.000000   -9999.000000       0.079400       0.121000
57123     57123     shaanxi        108.0669       34.2944          103       152     2012      12        30        365              0.000000      -2.782745       0.000000       0.184381       0.110000   -9999.000000       0.068500   -9999.000000
57123     57123     shaanxi        108.0669       34.2944          103       152     2012      12        31        366              0.175333      -1.306000       0.000000       0.203781   -9999.000000   -9999.000000       0.075800   -9999.000000
