# Supplementary material for: Research on Fusing Multisatellite Soil Moisture Data Based on Bayesian Model Averaging
Source: Hindawi journal article supplement (doi:10.1155/2018/9310838), 2018-06-25
Supplement: f1 [file 9310838.f1.zip › 2012_sm00-10cm_daily_ZDB_ZHY_57127_366days_allin.txt]

57127     57127     shaanxi        107.0333       33.0667          108       148     2012      01        01        001              0.000000   -9999.000000       0.563454   -9999.000000       0.111000   -9999.000000   -9999.000000   -9999.000000
57127     57127     shaanxi        107.0333       33.0667          108       148     2012      01        02        002              0.102500       2.288208       0.572558       0.265812   -9999.000000   -9999.000000   -9999.000000       0.268000
57127     57127     shaanxi        107.0333       33.0667          108       148     2012      01        03        003              0.000000       4.137451       0.398643       0.285161   -9999.000000   -9999.000000       0.039500   -9999.000000
57127     57127     shaanxi        107.0333       33.0667          108       148     2012      01        04        004              0.101783       2.785431       0.000000       0.266067   -9999.000000   -9999.000000       0.038800       0.117000
57127     57127     shaanxi        107.0333       33.0667          108       148     2012      01        05        005              0.101417       2.279724       0.000000       0.271908   -9999.000000   -9999.000000       0.041300   -9999.000000
57127     57127     shaanxi        107.0333       33.0667          108       148     2012      01        06        006              0.100875       2.643036       0.000000       0.279017   -9999.000000   -9999.000000       0.042800       0.074000
57127     57127     shaanxi        107.0333       33.0667          108       148     2012      01        07        007              0.100833       2.643890       1.036185       0.281996   -9999.000000   -9999.000000   -9999.000000   -9999.000000
57127     57127     shaanxi        107.0333       33.0667          108       148     2012      01        08        008              0.000000       2.959351       0.251695       0.282918   -9999.000000   -9999.000000   -9999.000000   -9999.000000
57127     57127     shaanxi        107.0333       33.0667          108       148     2012      01        09        009              0.100125       3.406708       0.000000       0.282846   -9999.000000   -9999.000000   -9999.000000       0.077000
57127     57127     shaanxi        107.0333       33.0667          108       148     2012      01        10        010              0.099458       4.344849       0.000000       0.283339       0.104000       0.056400       0.034300   -9999.000000
57127     57127     shaanxi        107.0333       33.0667          108       148     2012      01        11        011              0.098958       4.031799       0.879593       0.281983   -9999.000000   -9999.000000       0.036900       0.240000
57127     57127     shaanxi        107.0333       33.0667          108       148     2012      01        12        012              0.097833       4.492554       0.000000       0.282966   -9999.000000       0.026300       0.038300   -9999.000000
57127     57127     shaanxi        107.0333       33.0667          108       148     2012      01        13        013              0.097333       4.503357       0.491218       0.283438   -9999.000000   -9999.000000   -9999.000000   -9999.000000
57127     57127     shaanxi        107.0333       33.0667          108       148     2012      01        14        014              0.099417       4.967743       0.479890       0.284312   -9999.000000   -9999.000000       0.038600       0.270000
57127     57127     shaanxi        107.0333       33.0667          108       148     2012      01        15        015              0.099292       3.753571       0.000000       0.286330   -9999.000000       0.095100       0.030000   -9999.000000
57127     57127     shaanxi        107.0333       33.0667          108       148     2012      01        16        016              0.098583       3.944580       0.000000       0.284905   -9999.000000   -9999.000000       0.031000       0.287000
57127     57127     shaanxi        107.0333       33.0667          108       148     2012      01        17        017              0.000000       4.064240       0.000000       0.284853       0.106000   -9999.000000       0.034500   -9999.000000
57127     57127     shaanxi        107.0333       33.0667          108       148     2012      01        18        018              0.096708       5.233948       0.000000       0.284170   -9999.000000   -9999.000000   -9999.000000       0.311000
57127     57127     shaanxi        107.0333       33.0667          108       148     2012      01        19        019              0.095417       5.039276       0.543416       0.283617   -9999.000000   -9999.000000   -9999.000000       0.256000
57127     57127     shaanxi        107.0333       33.0667          108       148     2012      01        20        020              0.094250       4.747070       0.435121       0.283372   -9999.000000       0.193700       0.032700   -9999.000000
57127     57127     shaanxi        107.0333       33.0667          108       148     2012      01        21        021              0.094958       4.488190       0.551843       0.283267   -9999.000000   -9999.000000       0.029700       0.096000
57127     57127     shaanxi        107.0333       33.0667          108       148     2012      01        22        022              0.093042       3.633911       0.000000       0.282891   -9999.000000   -9999.000000       0.030100   -9999.000000
57127     57127     shaanxi        107.0333       33.0667          108       148     2012      01        23        023              0.091583       3.200165       2.333540       0.278223   -9999.000000       0.072700       0.034500       0.278000
57127     57127     shaanxi        107.0333       33.0667          108       148     2012      01        24        024              0.090417       2.841522       0.455614       0.275263   -9999.000000   -9999.000000   -9999.000000       0.046000
57127     57127     shaanxi        107.0333       33.0667          108       148     2012      01        25        025              0.089917       3.172852       0.000000       0.263252   -9999.000000       0.045000   -9999.000000       0.199000
57127     57127     shaanxi        107.0333       33.0667          108       148     2012      01        26        026              0.089417       2.325806       5.892050       0.268014   -9999.000000   -9999.000000       0.024900       0.072000
57127     57127     shaanxi        107.0333       33.0667          108       148     2012      01        27        027              0.089250       3.479645       0.000000       0.271231   -9999.000000   -9999.000000       0.031700   -9999.000000
57127     57127     shaanxi        107.0333       33.0667          108       148     2012      01        28        028              0.088625       3.700958       0.000000       0.276757       0.078000       0.031600       0.033900       0.235000
57127     57127     shaanxi        107.0333       33.0667          108       148     2012      01        29        029              0.087583       5.544159       0.000000       0.280886   -9999.000000   -9999.000000       0.035500   -9999.000000
57127     57127     shaanxi        107.0333       33.0667          108       148     2012      01        30        030              0.086583       5.734741       0.000000       0.280648   -9999.000000   -9999.000000   -9999.000000       0.173000
57127     57127     shaanxi        107.0333       33.0667          108       148     2012      01        31        031              0.085792       6.381805       0.000000       0.280198       0.087000   -9999.000000       0.030600       0.186000
57127     57127     shaanxi        107.0333       33.0667          108       148     2012      02        01        032              0.085458       5.904724       0.000000       0.280659       0.096000   -9999.000000       0.025900   -9999.000000
57127     57127     shaanxi        107.0333       33.0667          108       148     2012      02        02        033              0.083375       6.905273       0.000000       0.280174   -9999.000000       0.062900       0.031900       0.063000
57127     57127     shaanxi        107.0333       33.0667          108       148     2012      02        03        034              0.083250       4.747711       0.000000       0.277496   -9999.000000   -9999.000000       0.033600   -9999.000000
57127     57127     shaanxi        107.0333       33.0667          108       148     2012      02        04        035              0.083292       3.183197       0.000000       0.278378   -9999.000000   -9999.000000   -9999.000000       0.174000
57127     57127     shaanxi        107.0333       33.0667          108       148     2012      02        05        036              0.083000       4.835388       0.000000       0.280046   -9999.000000   -9999.000000   -9999.000000   -9999.000000
57127     57127     shaanxi        107.0333       33.0667          108       148     2012      02        06        037              0.082708       5.689178       8.087695       0.280005       0.098000   -9999.000000       0.039500   -9999.000000
57127     57127     shaanxi        107.0333       33.0667          108       148     2012      02        07        038              0.080583       6.778534       0.000000       0.278634   -9999.000000       0.213900       0.038200       0.205000
57127     57127     shaanxi        107.0333       33.0667          108       148     2012      02        08        039              0.078542       5.582581       0.000000       0.277921       0.101000   -9999.000000       0.039400   -9999.000000
57127     57127     shaanxi        107.0333       33.0667          108       148     2012      02        09        040              0.077000       5.701813      47.484699       0.277000   -9999.000000   -9999.000000       0.040400       0.045000
57127     57127     shaanxi        107.0333       33.0667          108       148     2012      02        10        041              0.077333       4.029602       0.273241       0.275608   -9999.000000       0.047800   -9999.000000   -9999.000000
57127     57127     shaanxi        107.0333       33.0667          108       148     2012      02        11        042              0.076875       3.821808       0.000000       0.271733       0.101000   -9999.000000   -9999.000000   -9999.000000
57127     57127     shaanxi        107.0333       33.0667          108       148     2012      02        12        043              0.076458       4.290436       0.000000       0.275449   -9999.000000   -9999.000000   -9999.000000       0.203000
57127     57127     shaanxi        107.0333       33.0667          108       148     2012      02        13        044              0.076000       5.705261       0.000000       0.277678   -9999.000000   -9999.000000       0.026400   -9999.000000
57127     57127     shaanxi        107.0333       33.0667          108       148     2012      02        14        045              0.076000       4.508881       0.000000       0.278118   -9999.000000   -9999.000000   -9999.000000       0.154000
57127     57127     shaanxi        107.0333       33.0667          108       148     2012      02        15        046              0.076125       5.210327       0.000000       0.278414   -9999.000000   -9999.000000       0.030400   -9999.000000
57127     57127     shaanxi        107.0333       33.0667          108       148     2012      02        16        047              0.076250       5.697083       0.448030       0.278528   -9999.000000   -9999.000000   -9999.000000       0.084000
57127     57127     shaanxi        107.0333       33.0667          108       148     2012      02        17        048              0.077542       5.518524       2.003400       0.278855   -9999.000000   -9999.000000       0.029300       0.245000
57127     57127     shaanxi        107.0333       33.0667          108       148     2012      02        18        049              0.077458       5.103546       0.000000       0.279050   -9999.000000   -9999.000000       0.025600   -9999.000000
57127     57127     shaanxi        107.0333       33.0667          108       148     2012      02        19        050              0.077167       5.225769       0.000000       0.278382   -9999.000000   -9999.000000       0.028400       0.110000
57127     57127     shaanxi        107.0333       33.0667          108       148     2012      02        20        051              0.077458       4.947052       0.000000       0.278790   -9999.000000   -9999.000000       0.031700   -9999.000000
57127     57127     shaanxi        107.0333       33.0667          108       148     2012      02        21        052              0.077167       6.486725       1.164767       0.278053       0.083000   -9999.000000   -9999.000000       0.162000
57127     57127     shaanxi        107.0333       33.0667          108       148     2012      02        22        053              0.077500       7.083893       0.111928       0.277784       0.082500   -9999.000000   -9999.000000       0.233000
57127     57127     shaanxi        107.0333       33.0667          108       148     2012      02        23        054              0.077000       8.519623       2.596570       0.277304       0.097000   -9999.000000       0.030000       0.172000
57127     57127     shaanxi        107.0333       33.0667          108       148     2012      02        24        055              0.077000       6.761810       0.549422       0.278382   -9999.000000   -9999.000000       0.029000       0.130000
57127     57127     shaanxi        107.0333       33.0667          108       148     2012      02        25        056              0.077000       5.167297       0.400463       0.278745   -9999.000000       0.167200       0.030300   -9999.000000
57127     57127     shaanxi        107.0333       33.0667          108       148     2012      02        26        057              0.076625       4.384705       0.267909       0.278451   -9999.000000   -9999.000000       0.030300       0.140000
57127     57127     shaanxi        107.0333       33.0667          108       148     2012      02        27        058              0.076042       4.791901       0.182608       0.276838   -9999.000000   -9999.000000   -9999.000000   -9999.000000
57127     57127     shaanxi        107.0333       33.0667          108       148     2012      02        28        059              0.076000       4.902039       0.358558       0.277179       0.089000       0.112600   -9999.000000       0.101000
57127     57127     shaanxi        107.0333       33.0667          108       148     2012      02        29        060              0.000000   -9999.000000       0.432080   -9999.000000       0.089000   -9999.000000   -9999.000000   -9999.000000
57127     57127     shaanxi        107.0333       33.0667          108       148     2012      03        01        061              0.076792       4.803070       0.536103       0.277688   -9999.000000       0.125200       0.028100   -9999.000000
57127     57127     shaanxi        107.0333       33.0667          108       148     2012      03        02        062              0.076167       6.637482       0.000000       0.277783       0.119000   -9999.000000       0.029300       0.218000
57127     57127     shaanxi        107.0333       33.0667          108       148     2012      03        03        063              0.074958       6.912323       0.000000       0.276984       0.110000   -9999.000000       0.028000   -9999.000000
57127     57127     shaanxi        107.0333       33.0667          108       148     2012      03        04        064              0.074375       6.159912       0.000000       0.276420       0.122000       0.033400   -9999.000000       0.125000
57127     57127     shaanxi        107.0333       33.0667          108       148     2012      03        05        065              0.074208       5.674713       0.216810       0.276320       0.109000   -9999.000000       0.038100   -9999.000000
57127     57127     shaanxi        107.0333       33.0667          108       148     2012      03        06        066              0.074375       6.182190       0.249462       0.276116   -9999.000000   -9999.000000       0.032200   -9999.000000
57127     57127     shaanxi        107.0333       33.0667          108       148     2012      03        07        067              0.000000       6.672363       0.755825       0.275928   -9999.000000   -9999.000000       0.042400       0.263000
57127     57127     shaanxi        107.0333       33.0667          108       148     2012      03        08        068              0.074708       7.072144       0.719759       0.276464   -9999.000000   -9999.000000       0.041300   -9999.000000
57127     57127     shaanxi        107.0333       33.0667          108       148     2012      03        09        069              0.074542       6.502228       0.287410       0.277354       0.109000   -9999.000000   -9999.000000       0.176000
57127     57127     shaanxi        107.0333       33.0667          108       148     2012      03        10        070              0.073917       8.010681       1.080752       0.275044       0.115000   -9999.000000   -9999.000000   -9999.000000
57127     57127     shaanxi        107.0333       33.0667          108       148     2012      03        11        071              0.072708      10.336121       0.000000       0.272344   -9999.000000   -9999.000000       0.035400   -9999.000000
57127     57127     shaanxi        107.0333       33.0667          108       148     2012      03        12        072              0.071417      11.473267       0.000000       0.270904       0.098000   -9999.000000       0.050500       0.331000
57127     57127     shaanxi        107.0333       33.0667          108       148     2012      03        13        073              0.070250      12.099609       0.000000       0.269754       0.094500   -9999.000000       0.048500   -9999.000000
57127     57127     shaanxi        107.0333       33.0667          108       148     2012      03        14        074              0.069042      14.027252       0.145962       0.267172       0.098000       0.079200   -9999.000000       0.146000
57127     57127     shaanxi        107.0333       33.0667          108       148     2012      03        15        075              0.071208      10.702728       0.723402       0.269805       0.103000   -9999.000000   -9999.000000   -9999.000000
57127     57127     shaanxi        107.0333       33.0667          108       148     2012      03        16        076              0.071958      10.557129       0.000000       0.271372       0.093000   -9999.000000       0.048000       0.325000
57127     57127     shaanxi        107.0333       33.0667          108       148     2012      03        17        077              0.070083      14.119171       0.000000       0.268444       0.092000   -9999.000000       0.036000       0.382000
57127     57127     shaanxi        107.0333       33.0667          108       148     2012      03        18        078              0.067167      16.139740       0.000000       0.265037       0.089000   -9999.000000       0.050100   -9999.000000
57127     57127     shaanxi        107.0333       33.0667          108       148     2012      03        19        079              0.064708      17.910675       0.000000       0.261602       0.090500   -9999.000000       0.049700       0.164000
57127     57127     shaanxi        107.0333       33.0667          108       148     2012      03        20        080              0.062000      16.072388       1.210793       0.260363       0.103000   -9999.000000       0.048700   -9999.000000
57127     57127     shaanxi        107.0333       33.0667          108       148     2012      03        21        081              0.060500      14.604767       0.529528       0.259132       0.139000   -9999.000000   -9999.000000       0.218000
57127     57127     shaanxi        107.0333       33.0667          108       148     2012      03        22        082              0.060875       9.324768       0.173010       0.262729   -9999.000000       0.055100       0.047000       0.245000
57127     57127     shaanxi        107.0333       33.0667          108       148     2012      03        23        083              0.060042       8.983063       0.000000       0.264870   -9999.000000   -9999.000000       0.044200       0.281000
57127     57127     shaanxi        107.0333       33.0667          108       148     2012      03        24        084              0.058750      11.876160       0.000000       0.260390       0.115500       0.130800       0.044300       0.230000
57127     57127     shaanxi        107.0333       33.0667          108       148     2012      03        25        085              0.000000      13.693939       0.000000       0.257409       0.112000   -9999.000000       0.047400   -9999.000000
57127     57127     shaanxi        107.0333       33.0667          108       148     2012      03        26        086              0.055500      16.037018       1.046466       0.254675       0.096000   -9999.000000   -9999.000000       0.310000
57127     57127     shaanxi        107.0333       33.0667          108       148     2012      03        27        087              0.054333      17.046387       0.072579       0.252868   -9999.000000   -9999.000000   -9999.000000   -9999.000000
57127     57127     shaanxi        107.0333       33.0667          108       148     2012      03        28        088              0.062875      17.612244       2.564151       0.252942       0.123000   -9999.000000       0.059000       0.655000
57127     57127     shaanxi        107.0333       33.0667          108       148     2012      03        29        089              0.069542      13.917389       0.000000       0.269149       0.113000   -9999.000000       0.063400       0.203000
57127     57127     shaanxi        107.0333       33.0667          108       148     2012      03        30        090              0.066375      17.163300       0.000000       0.261793       0.113500   -9999.000000       0.058800   -9999.000000
57127     57127     shaanxi        107.0333       33.0667          108       148     2012      03        31        091              0.062500      15.066956       0.000000       0.257434       0.118000   -9999.000000       0.059700       0.199000
57127     57127     shaanxi        107.0333       33.0667          108       148     2012      04        01        092              0.058250      16.885712       0.000000       0.251669       0.112000       0.141900   -9999.000000   -9999.000000
57127     57127     shaanxi        107.0333       33.0667          108       148     2012      04        02        093              0.054750      18.071808       1.521569       0.249781       0.114000   -9999.000000       0.047700       0.212000
57127     57127     shaanxi        107.0333       33.0667          108       148     2012      04        03        094              0.052833      17.819305       0.073032       0.250621       0.106000   -9999.000000       0.034800   -9999.000000
57127     57127     shaanxi        107.0333       33.0667          108       148     2012      04        04        095              0.051750      16.058777       0.000000       0.250886       0.102500   -9999.000000       0.047200   -9999.000000
57127     57127     shaanxi        107.0333       33.0667          108       148     2012      04        05        096              0.050833      18.377655       1.728357       0.246546       0.102000   -9999.000000       0.050000       0.239000
57127     57127     shaanxi        107.0333       33.0667          108       148     2012      04        06        097              0.049500      18.381836       0.391164       0.245594       0.117000   -9999.000000   -9999.000000   -9999.000000
57127     57127     shaanxi        107.0333       33.0667          108       148     2012      04        07        098              0.049000      18.826569       0.000000       0.244118   -9999.000000   -9999.000000   -9999.000000       0.189000
57127     57127     shaanxi        107.0333       33.0667          108       148     2012      04        08        099              0.048417      18.057648       0.000000       0.244075       0.113000   -9999.000000       0.049100   -9999.000000
57127     57127     shaanxi        107.0333       33.0667          108       148     2012      04        09        100              0.047667      18.918274       0.977306       0.241545       0.110000       0.054300       0.072800   -9999.000000
57127     57127     shaanxi        107.0333       33.0667          108       148     2012      04        10        101              0.047333      16.645325       0.459363       0.246160       0.107500   -9999.000000       0.069200       0.335000
57127     57127     shaanxi        107.0333       33.0667          108       148     2012      04        11        102              0.046333      20.666382       0.507051       0.240570       0.137000   -9999.000000       0.075900   -9999.000000
57127     57127     shaanxi        107.0333       33.0667          108       148     2012      04        12        103              0.044625      20.539948       0.000000       0.237838   -9999.000000   -9999.000000   -9999.000000       0.098000
57127     57127     shaanxi        107.0333       33.0667          108       148     2012      04        13        104              0.044208      14.615753       0.000000       0.238181       0.136000   -9999.000000   -9999.000000   -9999.000000
57127     57127     shaanxi        107.0333       33.0667          108       148     2012      04        14        105              0.043667      16.908936       0.000000       0.235433       0.127500       0.168900       0.059200       0.204000
57127     57127     shaanxi        107.0333       33.0667          108       148     2012      04        15        106              0.043208      18.598236       0.076422       0.232867       0.124000   -9999.000000       0.069900       0.311000
57127     57127     shaanxi        107.0333       33.0667          108       148     2012      04        16        107              0.042375      20.412628       0.525703       0.228628       0.114000   -9999.000000       0.063600   -9999.000000
57127     57127     shaanxi        107.0333       33.0667          108       148     2012      04        17        108              0.042000      19.941193       0.000000       0.230378   -9999.000000   -9999.000000       0.070000       0.279000
57127     57127     shaanxi        107.0333       33.0667          108       148     2012      04        18        109              0.042250      16.340454       0.000000       0.233046       0.128000   -9999.000000   -9999.000000   -9999.000000
57127     57127     shaanxi        107.0333       33.0667          108       148     2012      04        19        110              0.041958      19.589508       0.552782       0.227949       0.128500       0.136300       0.071400       0.306000
57127     57127     shaanxi        107.0333       33.0667          108       148     2012      04        20        111              0.041417      20.157776       0.361396       0.227995       0.121500   -9999.000000       0.050800       0.411000
57127     57127     shaanxi        107.0333       33.0667          108       148     2012      04        21        112              0.040625      20.860809       0.149154       0.223897       0.188000   -9999.000000       0.065000       0.511000
57127     57127     shaanxi        107.0333       33.0667          108       148     2012      04        22        113              0.040250      22.265869       0.000000       0.216562       0.153000   -9999.000000   -9999.000000       0.406000
57127     57127     shaanxi        107.0333       33.0667          108       148     2012      04        23        114              0.040583      23.840363       6.052197       0.209424       0.207000   -9999.000000   -9999.000000   -9999.000000
57127     57127     shaanxi        107.0333       33.0667          108       148     2012      04        24        115              0.040583      20.123169       0.000000       0.256373       0.177000   -9999.000000   -9999.000000       0.378000
57127     57127     shaanxi        107.0333       33.0667          108       148     2012      04        25        116              0.000000      21.290283       0.000000       0.233759       0.161000   -9999.000000       0.110100   -9999.000000
57127     57127     shaanxi        107.0333       33.0667          108       148     2012      04        26        117              0.038750      20.821075       0.000000       0.222291       0.174500       0.158100       0.114900       0.438000
57127     57127     shaanxi        107.0333       33.0667          108       148     2012      04        27        118              0.038458      22.352692       0.000000       0.214662       0.147000       0.090000       0.105400       0.293000
57127     57127     shaanxi        107.0333       33.0667          108       148     2012      04        28        119              0.038167      23.909882       0.166667       0.207919   -9999.000000   -9999.000000       0.107700   -9999.000000
57127     57127     shaanxi        107.0333       33.0667          108       148     2012      04        29        120              0.037417      25.191467       0.886016       0.200114       0.185000       0.124800   -9999.000000       0.522000
57127     57127     shaanxi        107.0333       33.0667          108       148     2012      04        30        121              0.036542      25.381958       0.000000       0.192354       0.187000   -9999.000000   -9999.000000   -9999.000000
57127     57127     shaanxi        107.0333       33.0667          108       148     2012      05        01        122              0.036000      21.716309       0.414672       0.192559       0.214000   -9999.000000       0.046800       0.649000
57127     57127     shaanxi        107.0333       33.0667          108       148     2012      05        02        123              0.037083      19.557587       2.408689       0.199905       0.200000       0.154500       0.059700   -9999.000000
57127     57127     shaanxi        107.0333       33.0667          108       148     2012      05        03        124              0.107208      20.050751      11.408369       0.216465   -9999.000000   -9999.000000       0.063200   -9999.000000
57127     57127     shaanxi        107.0333       33.0667          108       148     2012      05        04        125              0.097708      19.004669       0.614075       0.276777       0.202000   -9999.000000       0.057700       0.657000
57127     57127     shaanxi        107.0333       33.0667          108       148     2012      05        05        126              0.082167      22.076599       0.000000       0.255308       0.192000   -9999.000000   -9999.000000   -9999.000000
57127     57127     shaanxi        107.0333       33.0667          108       148     2012      05        06        127              0.085375      21.820618       5.886860       0.245068       0.211500   -9999.000000       0.057100       0.544000
57127     57127     shaanxi        107.0333       33.0667          108       148     2012      05        07        128              0.160875      21.403625       2.117549       0.249827   -9999.000000       0.241600       0.111100   -9999.000000
57127     57127     shaanxi        107.0333       33.0667          108       148     2012      05        08        129              0.117292      21.359131       0.682682       0.273432   -9999.000000   -9999.000000       0.125700   -9999.000000
57127     57127     shaanxi        107.0333       33.0667          108       148     2012      05        09        130              0.095417      25.054504       4.024278       0.252750   -9999.000000   -9999.000000       0.128500       0.653000
57127     57127     shaanxi        107.0333       33.0667          108       148     2012      05        10        131              0.085250      25.117096      12.531017       0.243108       0.189000   -9999.000000   -9999.000000   -9999.000000
57127     57127     shaanxi        107.0333       33.0667          108       148     2012      05        11        132              0.189500      25.039276       8.295300       0.253744       0.233500   -9999.000000   -9999.000000       0.702000
57127     57127     shaanxi        107.0333       33.0667          108       148     2012      05        12        133              0.130583      23.251434       0.361514       0.297870       0.225000   -9999.000000       0.129000   -9999.000000
57127     57127     shaanxi        107.0333       33.0667          108       148     2012      05        13        134              0.156750      22.395172       8.908351       0.269966       0.253000   -9999.000000       0.142300       0.385000
57127     57127     shaanxi        107.0333       33.0667          108       148     2012      05        14        135              0.149792      17.793091       1.312888       0.289641       0.237000       0.028700       0.148400       0.503000
57127     57127     shaanxi        107.0333       33.0667          108       148     2012      05        15        136              0.118792      21.319305       0.000000       0.275410       0.229000   -9999.000000       0.147600   -9999.000000
57127     57127     shaanxi        107.0333       33.0667          108       148     2012      05        16        137              0.101000      22.957214       0.000000       0.263252       0.213500   -9999.000000   -9999.000000       0.363000
57127     57127     shaanxi        107.0333       33.0667          108       148     2012      05        17        138              0.088542      23.897156       0.000000       0.256217       0.214500       0.144600   -9999.000000   -9999.000000
57127     57127     shaanxi        107.0333       33.0667          108       148     2012      05        18        139              0.077333      23.748444       1.430418       0.251326       0.200000   -9999.000000       0.131700       0.433000
57127     57127     shaanxi        107.0333       33.0667          108       148     2012      05        19        140              0.067625      24.983185       0.000000       0.245126   -9999.000000       0.203400       0.149800       0.343000
57127     57127     shaanxi        107.0333       33.0667          108       148     2012      05        20        141              0.063000      26.095245       0.915659       0.237395   -9999.000000       0.096700       0.158700       0.307000
57127     57127     shaanxi        107.0333       33.0667          108       148     2012      05        21        142              0.219542      23.853973      32.383160       0.237505       0.345000   -9999.000000       0.259800       0.950000
57127     57127     shaanxi        107.0333       33.0667          108       148     2012      05        22        143              0.219167      19.729279       4.785704       0.322377       0.302000   -9999.000000   -9999.000000   -9999.000000
57127     57127     shaanxi        107.0333       33.0667          108       148     2012      05        23        144              0.203208      19.142700       5.869388       0.308138   -9999.000000   -9999.000000       0.256300       0.632000
57127     57127     shaanxi        107.0333       33.0667          108       148     2012      05        24        145              0.213667      19.150879       3.356613       0.297789   -9999.000000   -9999.000000       0.206100   -9999.000000
57127     57127     shaanxi        107.0333       33.0667          108       148     2012      05        25        146              0.000000      18.672638       0.192485       0.301713   -9999.000000   -9999.000000       0.270300       0.498000
57127     57127     shaanxi        107.0333       33.0667          108       148     2012      05        26        147              0.175750      19.384735       1.181136       0.290409       0.265000   -9999.000000       0.247400       0.478000
57127     57127     shaanxi        107.0333       33.0667          108       148     2012      05        27        148              0.160875      23.220795       0.561994       0.281633       0.278000   -9999.000000   -9999.000000   -9999.000000
57127     57127     shaanxi        107.0333       33.0667          108       148     2012      05        28        149              0.203375      24.075256      22.485008       0.279714       0.345000   -9999.000000   -9999.000000       1.000000
57127     57127     shaanxi        107.0333       33.0667          108       148     2012      05        29        150              0.184417      20.781982       0.000000       0.317337       0.221000   -9999.000000       0.257300   -9999.000000
57127     57127     shaanxi        107.0333       33.0667          108       148     2012      05        30        151              0.156792      23.371918       0.000000       0.299369       0.266000   -9999.000000       0.246600   -9999.000000
57127     57127     shaanxi        107.0333       33.0667          108       148     2012      05        31        152              0.147750      24.621002       0.734710       0.285438       0.298500   -9999.000000       0.256400   -9999.000000
57127     57127     shaanxi        107.0333       33.0667          108       148     2012      06        01        153              0.127625      21.501190       0.000000       0.284844       0.222000   -9999.000000       0.251000   -9999.000000
57127     57127     shaanxi        107.0333       33.0667          108       148     2012      06        02        154              0.118708      24.079010       0.196979       0.275254       0.237000   -9999.000000   -9999.000000       0.441000
57127     57127     shaanxi        107.0333       33.0667          108       148     2012      06        03        155              0.117083      23.877838       0.355491       0.271072       0.232000   -9999.000000   -9999.000000   -9999.000000
57127     57127     shaanxi        107.0333       33.0667          108       148     2012      06        04        156              0.112167      23.096527       0.462403       0.270016   -9999.000000       0.150700       0.264100       0.334000
57127     57127     shaanxi        107.0333       33.0667          108       148     2012      06        05        157              0.109917      24.711304       6.248869       0.264058       0.246000   -9999.000000       0.383800   -9999.000000
57127     57127     shaanxi        107.0333       33.0667          108       148     2012      06        06        158              0.109833      21.040680       1.103876       0.287843       0.223500       0.327200       0.370000   -9999.000000
57127     57127     shaanxi        107.0333       33.0667          108       148     2012      06        07        159              0.105500      23.314850       0.394639       0.276973       0.231500       0.181100       0.334700       0.525000
57127     57127     shaanxi        107.0333       33.0667          108       148     2012      06        08        160              0.100583      25.937164       0.000000       0.267591       0.207000   -9999.000000   -9999.000000   -9999.000000
57127     57127     shaanxi        107.0333       33.0667          108       148     2012      06        09        161              0.094750      25.182251       2.308189       0.262743   -9999.000000   -9999.000000       0.332800       0.347000
57127     57127     shaanxi        107.0333       33.0667          108       148     2012      06        10        162              0.087042      27.475525       3.693794       0.255042       0.236000   -9999.000000       0.307600   -9999.000000
57127     57127     shaanxi        107.0333       33.0667          108       148     2012      06        11        163              0.000000      27.110443       1.762505       0.248848       0.269000   -9999.000000       0.367200       0.375000
57127     57127     shaanxi        107.0333       33.0667          108       148     2012      06        12        164              0.076875      25.339996       0.000000       0.248786       0.233500       0.188900       0.359000       0.482000
57127     57127     shaanxi        107.0333       33.0667          108       148     2012      06        13        165              0.072417      27.340668       0.526189       0.240453       0.197000   -9999.000000   -9999.000000   -9999.000000
57127     57127     shaanxi        107.0333       33.0667          108       148     2012      06        14        166              0.068375      27.693054       0.000000       0.235142   -9999.000000   -9999.000000   -9999.000000       0.305000
57127     57127     shaanxi        107.0333       33.0667          108       148     2012      06        15        167              0.065125      28.252502       0.000000       0.226151       0.240000   -9999.000000       0.344100   -9999.000000
57127     57127     shaanxi        107.0333       33.0667          108       148     2012      06        16        168              0.064208      25.577881       0.254377       0.222044       0.246500   -9999.000000       0.366500       0.342000
57127     57127     shaanxi        107.0333       33.0667          108       148     2012      06        17        169              0.062708      26.588440       0.000000       0.217340       0.250500   -9999.000000       0.349000   -9999.000000
57127     57127     shaanxi        107.0333       33.0667          108       148     2012      06        18        170              0.062750      23.750336       0.191992       0.219114       0.252000   -9999.000000       0.383800       0.549000
57127     57127     shaanxi        107.0333       33.0667          108       148     2012      06        19        171              0.062208      25.883209       0.775052       0.214856       0.225000   -9999.000000   -9999.000000       0.476000
57127     57127     shaanxi        107.0333       33.0667          108       148     2012      06        20        172              0.063125      28.317413       5.148175       0.206032       0.252000   -9999.000000       0.354000   -9999.000000
57127     57127     shaanxi        107.0333       33.0667          108       148     2012      06        21        173              0.063000      28.075500       0.467184       0.225512       0.323000   -9999.000000       0.280300       0.479000
57127     57127     shaanxi        107.0333       33.0667          108       148     2012      06        22        174              0.242875      28.515167       0.000000       0.218104       0.286000       0.344800       0.344600   -9999.000000
57127     57127     shaanxi        107.0333       33.0667          108       148     2012      06        23        175              0.257625      28.919098       0.304105       0.203975       0.301500   -9999.000000       0.346300       0.479000
57127     57127     shaanxi        107.0333       33.0667          108       148     2012      06        24        176              0.255792      30.000885       1.952643       0.192442       0.265000       0.086900   -9999.000000       0.339000
57127     57127     shaanxi        107.0333       33.0667          108       148     2012      06        25        177              0.270375      29.522614      20.743162       0.191345   -9999.000000       0.127000   -9999.000000   -9999.000000
57127     57127     shaanxi        107.0333       33.0667          108       148     2012      06        26        178              0.296500      25.949829      10.344678       0.314687       0.353000   -9999.000000       0.124600       1.000000
57127     57127     shaanxi        107.0333       33.0667          108       148     2012      06        27        179              0.322042      24.835724       0.933348       0.285049       0.354000   -9999.000000       0.131400   -9999.000000
57127     57127     shaanxi        107.0333       33.0667          108       148     2012      06        28        180              0.319913      25.420197       1.831581       0.278867       0.361000   -9999.000000       0.120800       0.750000
57127     57127     shaanxi        107.0333       33.0667          108       148     2012      06        29        181              0.371042      24.988068      14.177491       0.272178   -9999.000000       0.109700       0.123700   -9999.000000
57127     57127     shaanxi        107.0333       33.0667          108       148     2012      06        30        182              0.358333      24.713409       0.222783       0.308397   -9999.000000       0.284300   -9999.000000   -9999.000000
57127     57127     shaanxi        107.0333       33.0667          108       148     2012      07        01        183              0.339333      25.773010       5.902958       0.282926       0.271000   -9999.000000   -9999.000000       0.626000
57127     57127     shaanxi        107.0333       33.0667          108       148     2012      07        02        184              0.413292      25.158447      52.034901       0.277622       0.330000       0.128000       0.078300   -9999.000000
57127     57127     shaanxi        107.0333       33.0667          108       148     2012      07        03        185              0.393667      24.214996       8.601326       0.350460       0.267000   -9999.000000       0.064200       1.000000
57127     57127     shaanxi        107.0333       33.0667          108       148     2012      07        04        186              0.404250      25.750031       5.669740       0.321751       0.217000       0.110900       0.075800   -9999.000000
57127     57127     shaanxi        107.0333       33.0667          108       148     2012      07        05        187              0.379792      24.963531       0.000000       0.318530   -9999.000000   -9999.000000       0.072600   -9999.000000
57127     57127     shaanxi        107.0333       33.0667          108       148     2012      07        06        188              0.368292      27.191193      11.083301       0.298685   -9999.000000   -9999.000000   -9999.000000       0.522000
57127     57127     shaanxi        107.0333       33.0667          108       148     2012      07        07        189              0.422333      28.212067      39.478771       0.298871   -9999.000000   -9999.000000       0.077600   -9999.000000
57127     57127     shaanxi        107.0333       33.0667          108       148     2012      07        08        190              0.421792      26.008179      25.660852       0.346164       0.268000   -9999.000000       0.051500       1.000000
57127     57127     shaanxi        107.0333       33.0667          108       148     2012      07        09        191              0.424417      24.986969      32.015709       0.346062       0.289000   -9999.000000       0.200700   -9999.000000
57127     57127     shaanxi        107.0333       33.0667          108       148     2012      07        10        192              0.395583      24.233490       0.000000       0.343247       0.231000       0.330800       0.191500       0.806000
57127     57127     shaanxi        107.0333       33.0667          108       148     2012      07        11        193              0.379500      28.053070       0.000000       0.309512   -9999.000000   -9999.000000   -9999.000000       0.607000
57127     57127     shaanxi        107.0333       33.0667          108       148     2012      07        12        194              0.362917      28.553772       0.000000       0.299367       0.360000   -9999.000000   -9999.000000   -9999.000000
57127     57127     shaanxi        107.0333       33.0667          108       148     2012      07        13        195              0.345917      28.573425       0.784734       0.291945       0.349000       0.205900       0.176900       0.588000
57127     57127     shaanxi        107.0333       33.0667          108       148     2012      07        14        196              0.335167      28.540222       3.545199       0.286609       0.374000   -9999.000000       0.171800   -9999.000000
57127     57127     shaanxi        107.0333       33.0667          108       148     2012      07        15        197              0.354250      28.262970       0.451364       0.289328       0.273000   -9999.000000       0.171100       0.508000
57127     57127     shaanxi        107.0333       33.0667          108       148     2012      07        16        198              0.377958      28.652588       4.223026       0.285504   -9999.000000   -9999.000000       0.184000   -9999.000000
57127     57127     shaanxi        107.0333       33.0667          108       148     2012      07        17        199              0.365292      28.365448       3.384076       0.282119       0.382000   -9999.000000   -9999.000000       0.390000
57127     57127     shaanxi        107.0333       33.0667          108       148     2012      07        18        200              0.352875      26.306793       0.000000       0.281235       0.358000       0.168600   -9999.000000       0.406000
57127     57127     shaanxi        107.0333       33.0667          108       148     2012      07        19        201              0.349083      27.548279       9.364937       0.276542       0.350000   -9999.000000       0.179000   -9999.000000
57127     57127     shaanxi        107.0333       33.0667          108       148     2012      07        20        202              0.372087      27.322784       3.150286       0.286602       0.391000       0.272100       0.170000       0.702000
57127     57127     shaanxi        107.0333       33.0667          108       148     2012      07        21        203              0.397043      27.364868      43.221920       0.300204   -9999.000000   -9999.000000       0.186000   -9999.000000
57127     57127     shaanxi        107.0333       33.0667          108       148     2012      07        22        204              0.393500      25.752136       0.442050       0.370720       0.493000   -9999.000000       0.184700       0.547000
57127     57127     shaanxi        107.0333       33.0667          108       148     2012      07        23        205              0.387917      27.266418       1.523097       0.314569       0.495000   -9999.000000   -9999.000000       0.715000
57127     57127     shaanxi        107.0333       33.0667          108       148     2012      07        24        206              0.383458      25.026154       2.710643       0.306492       0.491000   -9999.000000       0.186200   -9999.000000
57127     57127     shaanxi        107.0333       33.0667          108       148     2012      07        25        207              0.401250      26.490143       2.169315       0.300596       0.494000   -9999.000000       0.176100       0.599000
57127     57127     shaanxi        107.0333       33.0667          108       148     2012      07        26        208              0.400083      27.760590       0.249139       0.302708       0.488000   -9999.000000       0.205600   -9999.000000
57127     57127     shaanxi        107.0333       33.0667          108       148     2012      07        27        209              0.389292      28.258240       2.433393       0.295556   -9999.000000   -9999.000000       0.192400       0.595000
57127     57127     shaanxi        107.0333       33.0667          108       148     2012      07        28        210              0.382458      28.547852       0.298010       0.290979       0.495000   -9999.000000   -9999.000000   -9999.000000
57127     57127     shaanxi        107.0333       33.0667          108       148     2012      07        29        211              0.374208      29.658844       3.839316       0.284636       0.470000   -9999.000000   -9999.000000   -9999.000000
57127     57127     shaanxi        107.0333       33.0667          108       148     2012      07        30        212              0.386917      30.155304       4.511900       0.288739       0.466000   -9999.000000       0.135100       0.542000
57127     57127     shaanxi        107.0333       33.0667          108       148     2012      07        31        213              0.406125      29.348389       1.084970       0.291105       0.469000       0.139600       0.143900   -9999.000000
57127     57127     shaanxi        107.0333       33.0667          108       148     2012      08        01        214              0.399625      28.015503       2.758283       0.289084   -9999.000000   -9999.000000       0.145700       0.480000
57127     57127     shaanxi        107.0333       33.0667          108       148     2012      08        02        215              0.399042      25.255524       0.426739       0.294750       0.485000       0.222400       0.146700   -9999.000000
57127     57127     shaanxi        107.0333       33.0667          108       148     2012      08        03        216              0.391667      27.338226       3.014744       0.286587       0.480500   -9999.000000   -9999.000000   -9999.000000
57127     57127     shaanxi        107.0333       33.0667          108       148     2012      08        04        217              0.379958      28.859680       0.000000       0.280411       0.461500       0.276800   -9999.000000       0.558000
57127     57127     shaanxi        107.0333       33.0667          108       148     2012      08        05        218              0.368625      29.685608       2.522944       0.274366       0.479500       0.234800       0.120200   -9999.000000
57127     57127     shaanxi        107.0333       33.0667          108       148     2012      08        06        219              0.376042      29.731049       5.012302       0.270479       0.444000   -9999.000000       0.131300       0.763000
57127     57127     shaanxi        107.0333       33.0667          108       148     2012      08        07        220              0.385583      28.869385       0.000000       0.281286   -9999.000000       0.167600       0.133900   -9999.000000
57127     57127     shaanxi        107.0333       33.0667          108       148     2012      08        08        221              0.373583      29.756775       0.000000       0.275259       0.484000   -9999.000000       0.127700       0.477000
57127     57127     shaanxi        107.0333       33.0667          108       148     2012      08        09        222              0.359250      30.260925       0.000000       0.268440       0.462000   -9999.000000   -9999.000000       0.590000
57127     57127     shaanxi        107.0333       33.0667          108       148     2012      08        10        223              0.345474      30.465912       0.000000       0.262964       0.481500       0.177200       0.123600   -9999.000000
57127     57127     shaanxi        107.0333       33.0667          108       148     2012      08        11        224              0.332583      30.357117       1.439257       0.257665       0.322000   -9999.000000       0.118100       0.424000
57127     57127     shaanxi        107.0333       33.0667          108       148     2012      08        12        225              0.321625      30.336670       0.000000       0.254024   -9999.000000   -9999.000000       0.128700   -9999.000000
57127     57127     shaanxi        107.0333       33.0667          108       148     2012      08        13        226              0.311125      31.002838      24.617243       0.250197       0.462000   -9999.000000       0.123500       0.462000
57127     57127     shaanxi        107.0333       33.0667          108       148     2012      08        14        227              0.392250      30.974335      15.440872       0.302110       0.448500   -9999.000000   -9999.000000       0.688000
57127     57127     shaanxi        107.0333       33.0667          108       148     2012      08        15        228              0.361750      27.948608       0.708797       0.326138       0.420500   -9999.000000   -9999.000000       0.615000
57127     57127     shaanxi        107.0333       33.0667          108       148     2012      08        16        229              0.380125      29.512482       3.556984       0.296264       0.478000   -9999.000000       0.130800       0.829000
57127     57127     shaanxi        107.0333       33.0667          108       148     2012      08        17        230              0.344750      27.314606       7.522103       0.298571       0.381000   -9999.000000       0.132400   -9999.000000
57127     57127     shaanxi        107.0333       33.0667          108       148     2012      08        18        231              0.301045      27.455261       1.517108       0.301537       0.473000       0.304400       0.125300       0.616000
57127     57127     shaanxi        107.0333       33.0667          108       148     2012      08        19        232              0.361750      26.548584      22.346016       0.295746   -9999.000000   -9999.000000       0.134400   -9999.000000
57127     57127     shaanxi        107.0333       33.0667          108       148     2012      08        20        233              0.375864      24.675598       0.093113       0.327891       0.473000       0.178300   -9999.000000       0.716000
57127     57127     shaanxi        107.0333       33.0667          108       148     2012      08        21        234              0.353500      24.509186       6.018906       0.310122       0.471500   -9999.000000       0.140900   -9999.000000
57127     57127     shaanxi        107.0333       33.0667          108       148     2012      08        22        235              0.328083      26.285950       1.248832       0.296670       0.427000   -9999.000000       0.109500   -9999.000000
57127     57127     shaanxi        107.0333       33.0667          108       148     2012      08        23        236              0.306292      26.249542       0.000000       0.290631   -9999.000000       0.251300       0.133500       0.426000
57127     57127     shaanxi        107.0333       33.0667          108       148     2012      08        24        237              0.291913      25.644836       0.000000       0.285136   -9999.000000   -9999.000000       0.135300   -9999.000000
57127     57127     shaanxi        107.0333       33.0667          108       148     2012      08        25        238              0.000000      25.835724       1.096009       0.280840       0.440000   -9999.000000       0.134300       0.568000
57127     57127     shaanxi        107.0333       33.0667          108       148     2012      08        26        239              0.329750      27.009705       0.000000       0.279280       0.440000   -9999.000000   -9999.000000   -9999.000000
57127     57127     shaanxi        107.0333       33.0667          108       148     2012      08        27        240              0.311333      27.427429       7.640050       0.275997       0.391000       0.094300       0.159500   -9999.000000
57127     57127     shaanxi        107.0333       33.0667          108       148     2012      08        28        241              0.295792      26.795471       0.221061       0.290292   -9999.000000       0.377200       0.156500       0.563000
57127     57127     shaanxi        107.0333       33.0667          108       148     2012      08        29        242              0.281583      27.366821       0.528950       0.279776       0.458000   -9999.000000       0.149800   -9999.000000
57127     57127     shaanxi        107.0333       33.0667          108       148     2012      08        30        243              0.309167      28.039215      27.054369       0.272943   -9999.000000   -9999.000000       0.170600       0.727000
57127     57127     shaanxi        107.0333       33.0667          108       148     2012      08        31        244              0.442958      26.077881     116.286446       0.306509   -9999.000000       0.256600   -9999.000000   -9999.000000
57127     57127     shaanxi        107.0333       33.0667          108       148     2012      09        01        245              0.428708      24.188721      39.831547       0.382071       0.247000   -9999.000000   -9999.000000   -9999.000000
57127     57127     shaanxi        107.0333       33.0667          108       148     2012      09        02        246              0.390625      21.913483       1.141695       0.445644       0.212000       0.250900       0.160200       0.613000
57127     57127     shaanxi        107.0333       33.0667          108       148     2012      09        03        247              0.368458      23.663757       0.659572       0.389562   -9999.000000   -9999.000000       0.196800   -9999.000000
57127     57127     shaanxi        107.0333       33.0667          108       148     2012      09        04        248              0.345458      23.758392       0.799717       0.341200       0.247000       0.116600       0.186500       0.506000
57127     57127     shaanxi        107.0333       33.0667          108       148     2012      09        05        249              0.324250      24.539978       0.000000       0.326981       0.233000       0.213700       0.174200   -9999.000000
57127     57127     shaanxi        107.0333       33.0667          108       148     2012      09        06        250              0.306042      25.614868       0.000000       0.318538       0.247500   -9999.000000   -9999.000000       0.568000
57127     57127     shaanxi        107.0333       33.0667          108       148     2012      09        07        251              0.367000      25.950623      38.331593       0.312935       0.239000       0.154500       0.231400       1.000000
57127     57127     shaanxi        107.0333       33.0667          108       148     2012      09        08        252              0.396208      24.461884       0.349519       0.339064   -9999.000000   -9999.000000       0.165300   -9999.000000
57127     57127     shaanxi        107.0333       33.0667          108       148     2012      09        09        253              0.366083      25.220062       1.795658       0.325634       0.294000       0.145600       0.177600       0.612000
57127     57127     shaanxi        107.0333       33.0667          108       148     2012      09        10        254              0.422500      24.800110      13.509617       0.322315       0.326000       0.265700       0.281700   -9999.000000
57127     57127     shaanxi        107.0333       33.0667          108       148     2012      09        11        255              0.397417      22.114197       0.000000       0.332759       0.213500   -9999.000000   -9999.000000       0.736000
57127     57127     shaanxi        107.0333       33.0667          108       148     2012      09        12        256              0.378708      23.974335       0.000000       0.319034       0.271000   -9999.000000   -9999.000000       0.562000
57127     57127     shaanxi        107.0333       33.0667          108       148     2012      09        13        257              0.355125      21.935608       0.000000       0.313640       0.196000   -9999.000000       0.240800       0.595000
57127     57127     shaanxi        107.0333       33.0667          108       148     2012      09        14        258              0.335833      21.458099       0.000000       0.308555       0.251000       0.026000       0.247900       0.532000
57127     57127     shaanxi        107.0333       33.0667          108       148     2012      09        15        259              0.326333      22.171906       1.310932       0.305601       0.258000       0.102200       0.243500   -9999.000000
57127     57127     shaanxi        107.0333       33.0667          108       148     2012      09        16        260              0.326792      20.511658       0.483645       0.307730       0.233000   -9999.000000       0.254600       0.718000
57127     57127     shaanxi        107.0333       33.0667          108       148     2012      09        17        261              0.317417      20.594299       0.797048       0.306966       0.244000   -9999.000000   -9999.000000   -9999.000000
57127     57127     shaanxi        107.0333       33.0667          108       148     2012      09        18        262              0.308708      21.843079       0.000000       0.303041       0.230000   -9999.000000   -9999.000000       0.573000
57127     57127     shaanxi        107.0333       33.0667          108       148     2012      09        19        263              0.299833      21.920959       0.000000       0.301422   -9999.000000   -9999.000000       0.179200       0.456000
57127     57127     shaanxi        107.0333       33.0667          108       148     2012      09        20        264              0.298000      22.751038       1.282494       0.299495       0.250000   -9999.000000       0.196500   -9999.000000
57127     57127     shaanxi        107.0333       33.0667          108       148     2012      09        21        265              0.293792      21.218475       0.000000       0.302507   -9999.000000   -9999.000000       0.202600       0.616000
57127     57127     shaanxi        107.0333       33.0667          108       148     2012      09        22        266              0.291500      22.815887       0.000000       0.299592       0.140000   -9999.000000       0.206600   -9999.000000
57127     57127     shaanxi        107.0333       33.0667          108       148     2012      09        23        267              0.292833      21.934540       0.551030       0.299004       0.160000   -9999.000000   -9999.000000       0.514000
57127     57127     shaanxi        107.0333       33.0667          108       148     2012      09        24        268              0.294375      21.668091      11.408115       0.298818   -9999.000000   -9999.000000       0.134800   -9999.000000
57127     57127     shaanxi        107.0333       33.0667          108       148     2012      09        25        269              0.353167      21.359070       3.634726       0.307823       0.170000   -9999.000000       0.112200   -9999.000000
57127     57127     shaanxi        107.0333       33.0667          108       148     2012      09        26        270              0.348125      20.356201       0.453992       0.318601       0.153000   -9999.000000       0.137600       0.761000
57127     57127     shaanxi        107.0333       33.0667          108       148     2012      09        27        271              0.337643      21.301514       0.482957       0.304934       0.145500       0.038700       0.137400   -9999.000000
57127     57127     shaanxi        107.0333       33.0667          108       148     2012      09        28        272              0.317333      22.554138       2.115578       0.299490       0.145500   -9999.000000   -9999.000000       0.630000
57127     57127     shaanxi        107.0333       33.0667          108       148     2012      09        29        273              0.309083      21.575165       1.653270       0.295836       0.139000   -9999.000000   -9999.000000   -9999.000000
57127     57127     shaanxi        107.0333       33.0667          108       148     2012      09        30        274              0.303333      21.931732       1.724994       0.296468   -9999.000000   -9999.000000       0.124400   -9999.000000
57127     57127     shaanxi        107.0333       33.0667          108       148     2012      10        01        275              0.293250      22.129517       0.523957       0.294645       0.178000   -9999.000000       0.074300       0.669000
57127     57127     shaanxi        107.0333       33.0667          108       148     2012      10        02        276              0.377625      21.975433      26.754805       0.292292       0.170000       0.142400       0.087700   -9999.000000
57127     57127     shaanxi        107.0333       33.0667          108       148     2012      10        03        277              0.389792      19.636627       0.000000       0.332451       0.162500       0.241100       0.083500       0.672000
57127     57127     shaanxi        107.0333       33.0667          108       148     2012      10        04        278              0.378167      20.785187       0.000000       0.310378       0.142000   -9999.000000   -9999.000000   -9999.000000
57127     57127     shaanxi        107.0333       33.0667          108       148     2012      10        05        279              0.368000      20.308685       0.733735       0.303296   -9999.000000   -9999.000000   -9999.000000       0.723000
57127     57127     shaanxi        107.0333       33.0667          108       148     2012      10        06        280              0.362292      20.704041       0.158510       0.300159       0.190000   -9999.000000       0.068600       0.620000
57127     57127     shaanxi        107.0333       33.0667          108       148     2012      10        07        281              0.361000      19.374573       0.528442       0.300227       0.192500   -9999.000000       0.082600   -9999.000000
57127     57127     shaanxi        107.0333       33.0667          108       148     2012      10        08        282              0.364958      18.363739       0.835862       0.299522       0.169000       0.316000       0.073700       0.780000
57127     57127     shaanxi        107.0333       33.0667          108       148     2012      10        09        283              0.361375      18.041321       0.075079       0.300628       0.168000   -9999.000000       0.070800   -9999.000000
57127     57127     shaanxi        107.0333       33.0667          108       148     2012      10        10        284              0.355542      19.194550       0.839024       0.296488       0.156000       0.174100   -9999.000000       0.557000
57127     57127     shaanxi        107.0333       33.0667          108       148     2012      10        11        285              0.357708      19.126648       0.450691       0.296043       0.134000   -9999.000000       0.072800       0.596000
57127     57127     shaanxi        107.0333       33.0667          108       148     2012      10        12        286              0.358083      18.318146       0.000000       0.297705       0.121000   -9999.000000       0.059000       0.620000
57127     57127     shaanxi        107.0333       33.0667          108       148     2012      10        13        287              0.353333      18.115326       0.000000       0.295797       0.119500       0.081100       0.072900       0.591000
57127     57127     shaanxi        107.0333       33.0667          108       148     2012      10        14        288              0.348792      18.971802       0.000000       0.293522       0.134000   -9999.000000       0.074200   -9999.000000
57127     57127     shaanxi        107.0333       33.0667          108       148     2012      10        15        289              0.346708      18.361969       0.000000       0.292705       0.130000       0.152000   -9999.000000       0.489000
57127     57127     shaanxi        107.0333       33.0667          108       148     2012      10        16        290              0.332708      17.718414       0.000000       0.292073   -9999.000000       0.194500   -9999.000000   -9999.000000
57127     57127     shaanxi        107.0333       33.0667          108       148     2012      10        17        291              0.320417      17.576813       0.000000       0.288560       0.128000   -9999.000000       0.102600       0.509000
57127     57127     shaanxi        107.0333       33.0667          108       148     2012      10        18        292              0.318000      17.677155       0.600558       0.287107       0.123000   -9999.000000       0.101000       0.426000
57127     57127     shaanxi        107.0333       33.0667          108       148     2012      10        19        293              0.315750      16.526276       0.000000       0.288097       0.115000   -9999.000000       0.103700   -9999.000000
57127     57127     shaanxi        107.0333       33.0667          108       148     2012      10        20        294              0.313292      17.132568       1.061322       0.287577       0.122000   -9999.000000       0.107500       0.550000
57127     57127     shaanxi        107.0333       33.0667          108       148     2012      10        21        295              0.313833      17.606750       0.908551       0.289664       0.186000   -9999.000000   -9999.000000   -9999.000000
57127     57127     shaanxi        107.0333       33.0667          108       148     2012      10        22        296              0.307333      15.616455       0.000000       0.291584   -9999.000000   -9999.000000       0.140000       0.380000
57127     57127     shaanxi        107.0333       33.0667          108       148     2012      10        23        297              0.306250      15.827606       0.782950       0.286870   -9999.000000   -9999.000000       0.107100   -9999.000000
57127     57127     shaanxi        107.0333       33.0667          108       148     2012      10        24        298              0.305667      13.541016       0.000000       0.289405   -9999.000000   -9999.000000       0.137600   -9999.000000
57127     57127     shaanxi        107.0333       33.0667          108       148     2012      10        25        299              0.000000      13.832031       0.000000       0.287306       0.178000   -9999.000000       0.145600       0.559000
57127     57127     shaanxi        107.0333       33.0667          108       148     2012      10        26        300              0.301625      13.434326       0.000000       0.286900       0.159000   -9999.000000       0.139800   -9999.000000
57127     57127     shaanxi        107.0333       33.0667          108       148     2012      10        27        301              0.297167      16.241730       0.000000       0.285165   -9999.000000   -9999.000000   -9999.000000       0.379000
57127     57127     shaanxi        107.0333       33.0667          108       148     2012      10        28        302              0.000000      16.353149       1.132379       0.284356       0.188000       0.136900       0.142200   -9999.000000
57127     57127     shaanxi        107.0333       33.0667          108       148     2012      10        29        303              0.300458      15.019226       0.624005       0.286374       0.160500   -9999.000000       0.131500   -9999.000000
57127     57127     shaanxi        107.0333       33.0667          108       148     2012      10        30        304              0.299042      15.549408       0.000000       0.289999       0.161500   -9999.000000       0.129700       0.532000
57127     57127     shaanxi        107.0333       33.0667          108       148     2012      10        31        305              0.295833      15.258850       0.601087       0.285846       0.133000   -9999.000000       0.138400   -9999.000000
57127     57127     shaanxi        107.0333       33.0667          108       148     2012      11        01        306              0.298208      14.804443      14.496164       0.284928   -9999.000000   -9999.000000   -9999.000000       0.550000
57127     57127     shaanxi        107.0333       33.0667          108       148     2012      11        02        307              0.301750      12.971771       0.331738       0.315692       0.161000   -9999.000000   -9999.000000   -9999.000000
57127     57127     shaanxi        107.0333       33.0667          108       148     2012      11        03        308              0.299042      12.877106       0.000000       0.298916       0.131000       0.178400       0.124300       0.585000
57127     57127     shaanxi        107.0333       33.0667          108       148     2012      11        04        309              0.294958      11.214630       0.531433       0.293061       0.113000   -9999.000000       0.135300       0.416000
57127     57127     shaanxi        107.0333       33.0667          108       148     2012      11        05        310              0.292875      11.173248       0.000000       0.290122       0.135000   -9999.000000       0.114900   -9999.000000
57127     57127     shaanxi        107.0333       33.0667          108       148     2012      11        06        311              0.293417      12.140503       5.580450       0.288242       0.145000   -9999.000000       0.121300       0.578000
57127     57127     shaanxi        107.0333       33.0667          108       148     2012      11        07        312              0.322417      11.602814       3.215265       0.294092   -9999.000000       0.147800   -9999.000000   -9999.000000
57127     57127     shaanxi        107.0333       33.0667          108       148     2012      11        08        313              0.333958      10.767456       0.634510       0.306810       0.173000       0.172700       0.128200       0.648000
57127     57127     shaanxi        107.0333       33.0667          108       148     2012      11        09        314              0.338250      10.808014       0.945442       0.297626       0.155000   -9999.000000       0.098700   -9999.000000
57127     57127     shaanxi        107.0333       33.0667          108       148     2012      11        10        315              0.337333      10.349670       0.223815       0.298073       0.156000   -9999.000000       0.126900       0.769000
57127     57127     shaanxi        107.0333       33.0667          108       148     2012      11        11        316              0.331917       9.904724       0.000000       0.293399       0.110000   -9999.000000       0.123400       0.428000
57127     57127     shaanxi        107.0333       33.0667          108       148     2012      11        12        317              0.325708      10.375366       0.000000       0.290705   -9999.000000   -9999.000000   -9999.000000   -9999.000000
57127     57127     shaanxi        107.0333       33.0667          108       148     2012      11        13        318              0.000000      11.863098       0.000000       0.289407       0.121000       0.217700   -9999.000000       0.544000
57127     57127     shaanxi        107.0333       33.0667          108       148     2012      11        14        319              0.320292      12.269379       0.715376       0.288845       0.124500   -9999.000000       0.102900   -9999.000000
57127     57127     shaanxi        107.0333       33.0667          108       148     2012      11        15        320              0.327208      11.912537       3.159220       0.288985       0.136000   -9999.000000       0.101200       0.669000
57127     57127     shaanxi        107.0333       33.0667          108       148     2012      11        16        321              0.330958      10.112885       0.000000       0.297520       0.117000       0.234000       0.091000       0.422000
57127     57127     shaanxi        107.0333       33.0667          108       148     2012      11        17        322              0.000000      10.530823       0.000000       0.291333       0.109000   -9999.000000       0.099000   -9999.000000
57127     57127     shaanxi        107.0333       33.0667          108       148     2012      11        18        323              0.325542      10.394012       0.000000       0.289458   -9999.000000       0.091400   -9999.000000       0.483000
57127     57127     shaanxi        107.0333       33.0667          108       148     2012      11        19        324              0.325000      11.214935       0.000000       0.288476       0.122000   -9999.000000   -9999.000000   -9999.000000
57127     57127     shaanxi        107.0333       33.0667          108       148     2012      11        20        325              0.323792       9.714508       0.000000       0.288580       0.110000   -9999.000000       0.063400       0.429000
57127     57127     shaanxi        107.0333       33.0667          108       148     2012      11        21        326              0.321792       9.596161       0.000000       0.288411       0.114500       0.080200       0.074600   -9999.000000
57127     57127     shaanxi        107.0333       33.0667          108       148     2012      11        22        327              0.319583      10.556793       0.868018       0.287812       0.112000   -9999.000000       0.076300   -9999.000000
57127     57127     shaanxi        107.0333       33.0667          108       148     2012      11        23        328              0.314500       9.664154       0.000000       0.288441   -9999.000000   -9999.000000       0.078300       0.442000
57127     57127     shaanxi        107.0333       33.0667          108       148     2012      11        24        329              0.312625       9.042694       2.680005       0.286225   -9999.000000   -9999.000000   -9999.000000   -9999.000000
57127     57127     shaanxi        107.0333       33.0667          108       148     2012      11        25        330              0.314917       7.135620       0.119167       0.290792   -9999.000000   -9999.000000       0.077200       0.374000
57127     57127     shaanxi        107.0333       33.0667          108       148     2012      11        26        331              0.314333       6.897125       1.949733       0.291532       0.110000       0.110700   -9999.000000   -9999.000000
57127     57127     shaanxi        107.0333       33.0667          108       148     2012      11        27        332              0.313750       6.403046       0.146914       0.288178       0.096000   -9999.000000       0.078900   -9999.000000
57127     57127     shaanxi        107.0333       33.0667          108       148     2012      11        28        333              0.313292       6.027466       0.545836       0.287365   -9999.000000       0.073800       0.083000       0.296000
57127     57127     shaanxi        107.0333       33.0667          108       148     2012      11        29        334              0.313000       6.158142       0.489615       0.286930   -9999.000000   -9999.000000   -9999.000000   -9999.000000
57127     57127     shaanxi        107.0333       33.0667          108       148     2012      11        30        335              0.312958       5.828491       0.330763       0.287458       0.127000   -9999.000000   -9999.000000       0.382000
57127     57127     shaanxi        107.0333       33.0667          108       148     2012      12        01        336              0.312542       6.258606       0.000000       0.287680       0.100000   -9999.000000       0.081100   -9999.000000
57127     57127     shaanxi        107.0333       33.0667          108       148     2012      12        02        337              0.311917       6.793976       0.000000       0.287788       0.130000   -9999.000000       0.083800       0.351000
57127     57127     shaanxi        107.0333       33.0667          108       148     2012      12        03        338              0.309792       6.979004       0.000000       0.286992       0.109000       0.168000       0.068100       0.372000
57127     57127     shaanxi        107.0333       33.0667          108       148     2012      12        04        339              0.308208       7.289886       0.000000       0.285595   -9999.000000       0.115900       0.070500   -9999.000000
57127     57127     shaanxi        107.0333       33.0667          108       148     2012      12        05        340              0.306417       7.613586       0.000000       0.285301   -9999.000000   -9999.000000   -9999.000000       0.300000
57127     57127     shaanxi        107.0333       33.0667          108       148     2012      12        06        341              0.305250       7.340942       0.000000       0.284490       0.096000       0.210300       0.068900   -9999.000000
57127     57127     shaanxi        107.0333       33.0667          108       148     2012      12        07        342              0.304000       8.191254       0.000000       0.284304       0.115000   -9999.000000       0.050600       0.324000
57127     57127     shaanxi        107.0333       33.0667          108       148     2012      12        08        343              0.303875       7.769501       0.000000       0.283933   -9999.000000   -9999.000000       0.068700   -9999.000000
57127     57127     shaanxi        107.0333       33.0667          108       148     2012      12        09        344              0.304000       6.228943       0.086385       0.284601   -9999.000000       0.084300       0.073300       0.366000
57127     57127     shaanxi        107.0333       33.0667          108       148     2012      12        10        345              0.303625       5.962891       0.000000       0.285368   -9999.000000   -9999.000000       0.062300       0.175000
57127     57127     shaanxi        107.0333       33.0667          108       148     2012      12        11        346              0.303875       5.898773       0.000000       0.285083   -9999.000000       0.051000   -9999.000000   -9999.000000
57127     57127     shaanxi        107.0333       33.0667          108       148     2012      12        12        347              0.304000       4.755859       4.856109       0.285449       0.128000   -9999.000000       0.061800       0.271000
57127     57127     shaanxi        107.0333       33.0667          108       148     2012      12        13        348              0.304000       4.442535       0.095816       0.285818   -9999.000000       0.062500       0.055900   -9999.000000
57127     57127     shaanxi        107.0333       33.0667          108       148     2012      12        14        349              0.304000       4.094421       0.000000       0.285975       0.108000       0.147300       0.056900       0.323000
57127     57127     shaanxi        107.0333       33.0667          108       148     2012      12        15        350              0.000000       5.144775       0.000000       0.285654   -9999.000000   -9999.000000       0.064300       0.313000
57127     57127     shaanxi        107.0333       33.0667          108       148     2012      12        16        351              0.304083       5.858795       0.706047       0.285818       0.132000       0.192100   -9999.000000   -9999.000000
57127     57127     shaanxi        107.0333       33.0667          108       148     2012      12        17        352              0.305042       6.163422       0.709856       0.286663   -9999.000000   -9999.000000   -9999.000000       0.445000
57127     57127     shaanxi        107.0333       33.0667          108       148     2012      12        18        353              0.306000       4.418427       0.670033       0.289474   -9999.000000   -9999.000000       0.049900   -9999.000000
57127     57127     shaanxi        107.0333       33.0667          108       148     2012      12        19        354              0.307458       4.237671       1.385353       0.287928   -9999.000000   -9999.000000       0.054900       0.560000
57127     57127     shaanxi        107.0333       33.0667          108       148     2012      12        20        355              0.000000       4.035248       0.450503       0.291241   -9999.000000   -9999.000000       0.051400   -9999.000000
57127     57127     shaanxi        107.0333       33.0667          108       148     2012      12        21        356              0.310833       3.734436       0.747380       0.290847   -9999.000000   -9999.000000       0.052800   -9999.000000
57127     57127     shaanxi        107.0333       33.0667          108       148     2012      12        22        357              0.311000       4.440918       0.060211       0.289878   -9999.000000   -9999.000000   -9999.000000       0.311000
57127     57127     shaanxi        107.0333       33.0667          108       148     2012      12        23        358              0.310500       3.857513       2.075523       0.281433   -9999.000000   -9999.000000       0.050700   -9999.000000
57127     57127     shaanxi        107.0333       33.0667          108       148     2012      12        24        359              0.310000       2.529419       0.000000       0.278056   -9999.000000   -9999.000000       0.043700       0.014000
57127     57127     shaanxi        107.0333       33.0667          108       148     2012      12        25        360              0.310000       2.181854       1.748120       0.272518   -9999.000000   -9999.000000       0.061700   -9999.000000
57127     57127     shaanxi        107.0333       33.0667          108       148     2012      12        26        361              0.000000       2.339142       0.428567       0.277457   -9999.000000   -9999.000000       0.065300   -9999.000000
57127     57127     shaanxi        107.0333       33.0667          108       148     2012      12        27        362              0.309000       1.978088       0.000000       0.278271   -9999.000000       0.097900   -9999.000000       0.254000
57127     57127     shaanxi        107.0333       33.0667          108       148     2012      12        28        363              0.000000       1.706146       0.163318       0.274767   -9999.000000   -9999.000000   -9999.000000   -9999.000000
57127     57127     shaanxi        107.0333       33.0667          108       148     2012      12        29        364              0.000000       1.999695       0.000000       0.270312   -9999.000000   -9999.000000       0.054200       0.008000
57127     57127     shaanxi        107.0333       33.0667          108       148     2012      12        30        365              0.000000       1.317657       2.536169       0.236386   -9999.000000   -9999.000000       0.062200   -9999.000000
57127     57127     shaanxi        107.0333       33.0667          108       148     2012      12        31        366              0.304867       1.065308       0.456970       0.221721   -9999.000000   -9999.000000       0.046900       0.008000
