# Supplementary material for: Research on Fusing Multisatellite Soil Moisture Data Based on Bayesian Model Averaging
Source: Hindawi journal article supplement (doi:10.1155/2018/9310838), 2018-06-25
Supplement: f1 [file 9310838.f1.zip › 2012_sm00-10cm_daily_ZDB_ZHY_57156_366days_allin.txt]

57156     57156     henan          111.5006       33.3175          107       166     2012      01        01        001              0.000000   -9999.000000       0.000000   -9999.000000       0.112000   -9999.000000       0.046200   -9999.000000
57156     57156     henan          111.5006       33.3175          107       166     2012      01        02        002              0.280000       2.190460       0.000000       0.227363       0.112000       0.036700   -9999.000000       0.139000
57156     57156     henan          111.5006       33.3175          107       166     2012      01        03        003              0.000000       2.906219       0.000000       0.241275       0.116000   -9999.000000   -9999.000000   -9999.000000
57156     57156     henan          111.5006       33.3175          107       166     2012      01        04        004              0.276958       2.215210       0.124517       0.218806   -9999.000000       0.220900       0.043100   -9999.000000
57156     57156     henan          111.5006       33.3175          107       166     2012      01        05        005              0.275792       1.302094       0.000000       0.195975   -9999.000000       0.148900       0.048500       0.124000
57156     57156     henan          111.5006       33.3175          107       166     2012      01        06        006              0.276042       1.361267       0.000000       0.198590       0.098000   -9999.000000       0.049800   -9999.000000
57156     57156     henan          111.5006       33.3175          107       166     2012      01        07        007              0.276500       2.009125       0.000000       0.209464   -9999.000000   -9999.000000       0.051500       0.045000
57156     57156     henan          111.5006       33.3175          107       166     2012      01        08        008              0.000000       1.324554       0.000000       0.211231       0.116000   -9999.000000   -9999.000000   -9999.000000
57156     57156     henan          111.5006       33.3175          107       166     2012      01        09        009              0.276333       2.731232       2.253325       0.223226   -9999.000000   -9999.000000   -9999.000000   -9999.000000
57156     57156     henan          111.5006       33.3175          107       166     2012      01        10        010              0.276417       3.307526       0.063229       0.230044   -9999.000000   -9999.000000       0.027800       0.250000
57156     57156     henan          111.5006       33.3175          107       166     2012      01        11        011              0.276333       3.751984       0.000000       0.232272       0.101000   -9999.000000       0.035000   -9999.000000
57156     57156     henan          111.5006       33.3175          107       166     2012      01        12        012              0.276125       2.542053       0.000000       0.216215       0.098000       0.030500       0.034200       0.003000
57156     57156     henan          111.5006       33.3175          107       166     2012      01        13        013              0.275958       1.920807       0.000000       0.210998   -9999.000000       0.039100       0.036800   -9999.000000
57156     57156     henan          111.5006       33.3175          107       166     2012      01        14        014              0.276750       1.742096       0.034002       0.221086   -9999.000000   -9999.000000   -9999.000000       0.131000
57156     57156     henan          111.5006       33.3175          107       166     2012      01        15        015              0.276500       2.077606       0.000000       0.231851   -9999.000000       0.056800       0.032900       0.128000
57156     57156     henan          111.5006       33.3175          107       166     2012      01        16        016              0.276333       2.436096       0.000000       0.234631       0.105000   -9999.000000       0.028200   -9999.000000
57156     57156     henan          111.5006       33.3175          107       166     2012      01        17        017              0.000000       2.393402       0.000000       0.229592       0.123500       0.052400       0.030900       0.035000
57156     57156     henan          111.5006       33.3175          107       166     2012      01        18        018              0.276833       3.687012       0.223234       0.241607       0.112000       0.041600       0.035000   -9999.000000
57156     57156     henan          111.5006       33.3175          107       166     2012      01        19        019              0.277000       3.645111       0.586463       0.247642       0.127000   -9999.000000   -9999.000000       0.197000
57156     57156     henan          111.5006       33.3175          107       166     2012      01        20        020              0.277000       3.265656       2.672437       0.250048   -9999.000000       0.011400   -9999.000000       0.428000
57156     57156     henan          111.5006       33.3175          107       166     2012      01        21        021              0.280583       2.408875       0.813735       0.250131   -9999.000000   -9999.000000       0.025900       0.112000
57156     57156     henan          111.5006       33.3175          107       166     2012      01        22        022              0.282833       0.448273       1.889627       0.200657   -9999.000000       0.048100       0.026400       0.030000
57156     57156     henan          111.5006       33.3175          107       166     2012      01        23        023              0.284458      -1.308411       3.018856       0.142557   -9999.000000       0.020100       0.035000   -9999.000000
57156     57156     henan          111.5006       33.3175          107       166     2012      01        24        024              0.284000      -0.390717       0.761343       0.170053   -9999.000000   -9999.000000   -9999.000000       0.097000
57156     57156     henan          111.5006       33.3175          107       166     2012      01        25        025              0.282000      -0.082397       0.586161       0.183779   -9999.000000   -9999.000000   -9999.000000   -9999.000000
57156     57156     henan          111.5006       33.3175          107       166     2012      01        26        026              0.281667       1.088654       0.621676       0.197882   -9999.000000   -9999.000000   -9999.000000       0.143000
57156     57156     henan          111.5006       33.3175          107       166     2012      01        27        027              0.281375       2.300171       0.217476       0.224256       0.087000   -9999.000000       0.030400       0.136000
57156     57156     henan          111.5006       33.3175          107       166     2012      01        28        028              0.281500       3.159119       0.000000       0.242292       0.092000       0.064000       0.036300   -9999.000000
57156     57156     henan          111.5006       33.3175          107       166     2012      01        29        029              0.281333       3.784210       0.000000       0.248657       0.107000   -9999.000000       0.037000       0.225000
57156     57156     henan          111.5006       33.3175          107       166     2012      01        30        030              0.280500       3.696106       0.000000       0.251517   -9999.000000       0.098800       0.038500   -9999.000000
57156     57156     henan          111.5006       33.3175          107       166     2012      01        31        031              0.280083       2.768402       0.000000       0.238012   -9999.000000       0.039900   -9999.000000       0.160000
57156     57156     henan          111.5006       33.3175          107       166     2012      02        01        032              0.279250       5.803833       0.000000       0.250101   -9999.000000   -9999.000000       0.033000   -9999.000000
57156     57156     henan          111.5006       33.3175          107       166     2012      02        02        033              0.278542       1.796875       0.000000       0.231308       0.104000       0.049200       0.033600   -9999.000000
57156     57156     henan          111.5006       33.3175          107       166     2012      02        03        034              0.277333       1.607269       0.000000       0.208813       0.103000   -9999.000000       0.036000       0.119000
57156     57156     henan          111.5006       33.3175          107       166     2012      02        04        035              0.277000       3.103668       0.135251       0.226824   -9999.000000       0.148800       0.042100   -9999.000000
57156     57156     henan          111.5006       33.3175          107       166     2012      02        05        036              0.277833       1.331970       0.067382       0.226975       0.111000       0.026400   -9999.000000       0.212000
57156     57156     henan          111.5006       33.3175          107       166     2012      02        06        037              0.278042       4.128113       0.000000       0.248233       0.094000   -9999.000000   -9999.000000   -9999.000000
57156     57156     henan          111.5006       33.3175          107       166     2012      02        07        038              0.277167       5.214142       0.000000       0.242847   -9999.000000       0.137500       0.033300   -9999.000000
57156     57156     henan          111.5006       33.3175          107       166     2012      02        08        039              0.276917       3.119415       0.000000       0.220468   -9999.000000   -9999.000000       0.038900       0.101000
57156     57156     henan          111.5006       33.3175          107       166     2012      02        09        040              0.276708       2.790192       0.122245       0.213398   -9999.000000   -9999.000000       0.038300   -9999.000000
57156     57156     henan          111.5006       33.3175          107       166     2012      02        10        041              0.276583       1.733765       0.000000       0.213063   -9999.000000       0.059100       0.039200       0.095000
57156     57156     henan          111.5006       33.3175          107       166     2012      02        11        042              0.276500       4.100098       0.000000       0.223127   -9999.000000   -9999.000000   -9999.000000   -9999.000000
57156     57156     henan          111.5006       33.3175          107       166     2012      02        12        043              0.276458       4.818024       0.000000       0.235419   -9999.000000   -9999.000000   -9999.000000       0.040000
57156     57156     henan          111.5006       33.3175          107       166     2012      02        13        044              0.276500       3.599854       0.000000       0.237535   -9999.000000       0.047200   -9999.000000       0.173000
57156     57156     henan          111.5006       33.3175          107       166     2012      02        14        045              0.276375       5.512390       0.000000       0.242031       0.093000   -9999.000000       0.033300   -9999.000000
57156     57156     henan          111.5006       33.3175          107       166     2012      02        15        046              0.275875       5.707031       0.294308       0.245060   -9999.000000   -9999.000000       0.035800       0.073000
57156     57156     henan          111.5006       33.3175          107       166     2012      02        16        047              0.275833       4.110687       0.000000       0.248054       0.097000   -9999.000000       0.033800   -9999.000000
57156     57156     henan          111.5006       33.3175          107       166     2012      02        17        048              0.275583       5.161804       0.000000       0.245865       0.080000   -9999.000000   -9999.000000       0.165000
57156     57156     henan          111.5006       33.3175          107       166     2012      02        18        049              0.274667       5.132843       0.000000       0.238644       0.070000       0.086500       0.029300       0.150000
57156     57156     henan          111.5006       33.3175          107       166     2012      02        19        050              0.274583       5.049072       0.304570       0.229451       0.086000   -9999.000000       0.031400       0.182000
57156     57156     henan          111.5006       33.3175          107       166     2012      02        20        051              0.274500       6.233826       0.000000       0.238948   -9999.000000       0.076500       0.034600       0.069000
57156     57156     henan          111.5006       33.3175          107       166     2012      02        21        052              0.275667       4.966125       0.000000       0.243032       0.089000   -9999.000000   -9999.000000   -9999.000000
57156     57156     henan          111.5006       33.3175          107       166     2012      02        22        053              0.276042       9.161926       0.000000       0.241141       0.083000       0.109900   -9999.000000       0.140000
57156     57156     henan          111.5006       33.3175          107       166     2012      02        23        054              0.273833      11.046692       0.164559       0.238597       0.090000       0.031200   -9999.000000   -9999.000000
57156     57156     henan          111.5006       33.3175          107       166     2012      02        24        055              0.272333       5.176514       0.000000       0.239799       0.083000   -9999.000000       0.028100       0.151000
57156     57156     henan          111.5006       33.3175          107       166     2012      02        25        056              0.271958       4.570343       0.000000       0.239975   -9999.000000       0.059600       0.033300       0.019000
57156     57156     henan          111.5006       33.3175          107       166     2012      02        26        057              0.271583       3.386322       0.050984       0.235387   -9999.000000   -9999.000000       0.032700   -9999.000000
57156     57156     henan          111.5006       33.3175          107       166     2012      02        27        058              0.271417       4.280243       0.000000       0.231590   -9999.000000   -9999.000000   -9999.000000       0.083000
57156     57156     henan          111.5006       33.3175          107       166     2012      02        28        059              0.271167       5.229340       0.000000       0.231425       0.088500   -9999.000000   -9999.000000   -9999.000000
57156     57156     henan          111.5006       33.3175          107       166     2012      02        29        060              0.000000   -9999.000000       0.000000   -9999.000000       0.089000   -9999.000000   -9999.000000   -9999.000000
57156     57156     henan          111.5006       33.3175          107       166     2012      03        01        061              0.270750       4.878387       4.388922       0.236908   -9999.000000   -9999.000000       0.027500   -9999.000000
57156     57156     henan          111.5006       33.3175          107       166     2012      03        02        062              0.272042       3.837799       4.072493       0.263653   -9999.000000       0.066500       0.034000   -9999.000000
57156     57156     henan          111.5006       33.3175          107       166     2012      03        03        063              0.279708       3.790283       3.209512       0.271788   -9999.000000   -9999.000000       0.036400       0.528000
57156     57156     henan          111.5006       33.3175          107       166     2012      03        04        064              0.282000       3.170471       0.223499       0.273462   -9999.000000   -9999.000000       0.036300   -9999.000000
57156     57156     henan          111.5006       33.3175          107       166     2012      03        05        065              0.281958       2.842560       0.759211       0.259817       0.113000   -9999.000000   -9999.000000       0.291000
57156     57156     henan          111.5006       33.3175          107       166     2012      03        06        066              0.281417       6.713226       0.000000       0.261337       0.116000       0.016500       0.034100   -9999.000000
57156     57156     henan          111.5006       33.3175          107       166     2012      03        07        067              0.000000       9.090546       0.183476       0.257471   -9999.000000       0.156700       0.034000   -9999.000000
57156     57156     henan          111.5006       33.3175          107       166     2012      03        08        068              0.279083       8.142944       0.484865       0.254788       0.115000   -9999.000000       0.032900       0.272000
57156     57156     henan          111.5006       33.3175          107       166     2012      03        09        069              0.277875       6.633453       0.623564       0.253542       0.102000       0.048400       0.038700   -9999.000000
57156     57156     henan          111.5006       33.3175          107       166     2012      03        10        070              0.277696       6.579224       0.000000       0.251258       0.103500   -9999.000000   -9999.000000       0.260000
57156     57156     henan          111.5006       33.3175          107       166     2012      03        11        071              0.276292      10.784637       0.000000       0.246829       0.092000   -9999.000000   -9999.000000   -9999.000000
57156     57156     henan          111.5006       33.3175          107       166     2012      03        12        072              0.275083       7.911346       0.131943       0.243009   -9999.000000       0.019800       0.024600       0.153000
57156     57156     henan          111.5006       33.3175          107       166     2012      03        13        073              0.274750       8.176788       0.000000       0.243096       0.100000   -9999.000000       0.032000       0.228000
57156     57156     henan          111.5006       33.3175          107       166     2012      03        14        074              0.274125      12.282410       0.467858       0.239368       0.093000       0.120100   -9999.000000   -9999.000000
57156     57156     henan          111.5006       33.3175          107       166     2012      03        15        075              0.274167      12.630493       2.967360       0.239129       0.113500   -9999.000000       0.040200       0.426000
57156     57156     henan          111.5006       33.3175          107       166     2012      03        16        076              0.276417       9.170319       0.471813       0.261063       0.098000   -9999.000000   -9999.000000   -9999.000000
57156     57156     henan          111.5006       33.3175          107       166     2012      03        17        077              0.276792      12.992218       0.000000       0.250015       0.102000       0.035700       0.033200       0.314000
57156     57156     henan          111.5006       33.3175          107       166     2012      03        18        078              0.276333      14.970367       3.149314       0.242790       0.108000   -9999.000000       0.035100       0.290000
57156     57156     henan          111.5006       33.3175          107       166     2012      03        19        079              0.276708      14.073883       0.916093       0.244404   -9999.000000       0.044300       0.048600       0.491000
57156     57156     henan          111.5006       33.3175          107       166     2012      03        20        080              0.277208       6.229401       0.000000       0.262987       0.109500       0.006100       0.050700       0.292000
57156     57156     henan          111.5006       33.3175          107       166     2012      03        21        081              0.287208       6.424683      13.028019       0.254960       0.153000   -9999.000000       0.054800   -9999.000000
57156     57156     henan          111.5006       33.3175          107       166     2012      03        22        082              0.291458       4.378815       0.155348       0.295205       0.135000   -9999.000000   -9999.000000       0.635000
57156     57156     henan          111.5006       33.3175          107       166     2012      03        23        083              0.288583       6.883179       0.000000       0.282440   -9999.000000   -9999.000000       0.044100   -9999.000000
57156     57156     henan          111.5006       33.3175          107       166     2012      03        24        084              0.286458      10.569489       0.000000       0.267798       0.125000       0.049300   -9999.000000       0.340000
57156     57156     henan          111.5006       33.3175          107       166     2012      03        25        085              0.000000      13.868469       0.000000       0.258635       0.106000   -9999.000000       0.040900       0.456000
57156     57156     henan          111.5006       33.3175          107       166     2012      03        26        086              0.282500      15.375305       1.144846       0.251116       0.106500   -9999.000000       0.059700   -9999.000000
57156     57156     henan          111.5006       33.3175          107       166     2012      03        27        087              0.280667      16.927979       0.000000       0.246836       0.106000       0.043800   -9999.000000       0.467000
57156     57156     henan          111.5006       33.3175          107       166     2012      03        28        088              0.280375      18.564117       7.086298       0.241936   -9999.000000   -9999.000000   -9999.000000   -9999.000000
57156     57156     henan          111.5006       33.3175          107       166     2012      03        29        089              0.284750      17.094269       0.000000       0.263735       0.113000   -9999.000000       0.046900       0.489000
57156     57156     henan          111.5006       33.3175          107       166     2012      03        30        090              0.282667      17.494904       0.000000       0.264171       0.108500       0.175900       0.056700   -9999.000000
57156     57156     henan          111.5006       33.3175          107       166     2012      03        31        091              0.282000      15.737823       0.000000       0.251849       0.106000   -9999.000000       0.050700   -9999.000000
57156     57156     henan          111.5006       33.3175          107       166     2012      04        01        092              0.280417      17.163940       0.000000       0.241451       0.118000       0.155000       0.055100       0.365000
57156     57156     henan          111.5006       33.3175          107       166     2012      04        02        093              0.278208      19.130951       0.000000       0.234986   -9999.000000   -9999.000000   -9999.000000   -9999.000000
57156     57156     henan          111.5006       33.3175          107       166     2012      04        03        094              0.276208      16.800934       0.000000       0.231646       0.121000       0.067900       0.068800       0.414000
57156     57156     henan          111.5006       33.3175          107       166     2012      04        04        095              0.273875      16.728577       5.774129       0.226727       0.116000       0.040000       0.062900   -9999.000000
57156     57156     henan          111.5006       33.3175          107       166     2012      04        05        096              0.273250      17.227966       0.000000       0.224318       0.115500   -9999.000000       0.067500   -9999.000000
57156     57156     henan          111.5006       33.3175          107       166     2012      04        06        097              0.271833      19.001068       1.931626       0.218219       0.112000   -9999.000000       0.068400       0.508000
57156     57156     henan          111.5006       33.3175          107       166     2012      04        07        098              0.269042      19.889923       0.000000       0.212097       0.113000   -9999.000000   -9999.000000   -9999.000000
57156     57156     henan          111.5006       33.3175          107       166     2012      04        08        099              0.267667      19.215332       0.000000       0.209333       0.106000       0.077200   -9999.000000       0.304000
57156     57156     henan          111.5006       33.3175          107       166     2012      04        09        100              0.263000      21.625519       3.263056       0.201598       0.128000   -9999.000000       0.059500   -9999.000000
57156     57156     henan          111.5006       33.3175          107       166     2012      04        10        101              0.267417      16.009766       0.000000       0.233994       0.111000   -9999.000000       0.060600       0.686000
57156     57156     henan          111.5006       33.3175          107       166     2012      04        11        102              0.267708      20.238373       0.314114       0.225867       0.137500       0.028100       0.056500       0.308000
57156     57156     henan          111.5006       33.3175          107       166     2012      04        12        103              0.264917      19.885712       2.105469       0.218010   -9999.000000   -9999.000000       0.064100   -9999.000000
57156     57156     henan          111.5006       33.3175          107       166     2012      04        13        104              0.267625      12.847290       0.000000       0.233816   -9999.000000   -9999.000000   -9999.000000       0.234000
57156     57156     henan          111.5006       33.3175          107       166     2012      04        14        105              0.266458      18.709747       0.000000       0.220259       0.146000   -9999.000000   -9999.000000   -9999.000000
57156     57156     henan          111.5006       33.3175          107       166     2012      04        15        106              0.266208      16.289398       0.000000       0.215970       0.124000   -9999.000000       0.046500       0.305000
57156     57156     henan          111.5006       33.3175          107       166     2012      04        16        107              0.266667      18.896057       0.483171       0.210329       0.115500   -9999.000000       0.101100       0.314000
57156     57156     henan          111.5006       33.3175          107       166     2012      04        17        108              0.265292      20.586670       0.000000       0.206073       0.131000       0.034000       0.096300       0.398000
57156     57156     henan          111.5006       33.3175          107       166     2012      04        18        109              0.264208      18.981781       0.000000       0.205998   -9999.000000   -9999.000000   -9999.000000       0.251000
57156     57156     henan          111.5006       33.3175          107       166     2012      04        19        110              0.261958      21.064026       0.535273       0.198001       0.126000       0.021900   -9999.000000   -9999.000000
57156     57156     henan          111.5006       33.3175          107       166     2012      04        20        111              0.268125      23.354065       0.187084       0.189867       0.131500   -9999.000000       0.103100       0.433000
57156     57156     henan          111.5006       33.3175          107       166     2012      04        21        112              0.276625      19.077698       0.000000       0.195334       0.191000   -9999.000000       0.091500   -9999.000000
57156     57156     henan          111.5006       33.3175          107       166     2012      04        22        113              0.274250      22.012085       0.000000       0.188251       0.162000       0.026700       0.099100       0.343000
57156     57156     henan          111.5006       33.3175          107       166     2012      04        23        114              0.274875      23.997681       4.393018       0.178961       0.188000   -9999.000000       0.133900       0.712000
57156     57156     henan          111.5006       33.3175          107       166     2012      04        24        115              0.292375      23.651093       2.568067       0.208515       0.200000   -9999.000000   -9999.000000   -9999.000000
57156     57156     henan          111.5006       33.3175          107       166     2012      04        25        116              0.000000      19.038452       0.000000       0.227286       0.209000       0.079100   -9999.000000       0.412000
57156     57156     henan          111.5006       33.3175          107       166     2012      04        26        117              0.285167      19.721100       0.000000       0.209393       0.181000       0.069300       0.116600   -9999.000000
57156     57156     henan          111.5006       33.3175          107       166     2012      04        27        118              0.282375      21.952454       0.000000       0.193882       0.172000   -9999.000000   -9999.000000       0.353000
57156     57156     henan          111.5006       33.3175          107       166     2012      04        28        119              0.277583      25.205933       0.000000       0.180714       0.169000   -9999.000000       0.119600   -9999.000000
57156     57156     henan          111.5006       33.3175          107       166     2012      04        29        120              0.273083      24.442566       0.000000       0.172008   -9999.000000       0.062900       0.123100   -9999.000000
57156     57156     henan          111.5006       33.3175          107       166     2012      04        30        121              0.270333      23.711487       4.850733       0.166633       0.217000       0.106300   -9999.000000       0.830000
57156     57156     henan          111.5006       33.3175          107       166     2012      05        01        122              0.270333      21.710052       0.088526       0.206228       0.189000   -9999.000000   -9999.000000   -9999.000000
57156     57156     henan          111.5006       33.3175          107       166     2012      05        02        123              0.269875      20.916901       0.111401       0.210094       0.202500   -9999.000000       0.144000       0.276000
57156     57156     henan          111.5006       33.3175          107       166     2012      05        03        124              0.266083      23.432526       1.267140       0.195991       0.197000   -9999.000000       0.165100   -9999.000000
57156     57156     henan          111.5006       33.3175          107       166     2012      05        04        125              0.259333      23.878204       0.000000       0.184947   -9999.000000   -9999.000000       0.155100   -9999.000000
57156     57156     henan          111.5006       33.3175          107       166     2012      05        05        126              0.249700      25.469177       0.000000       0.171007       0.188000   -9999.000000       0.155400       0.440000
57156     57156     henan          111.5006       33.3175          107       166     2012      05        06        127              0.242500      27.313751       1.062952       0.158112       0.160000   -9999.000000   -9999.000000   -9999.000000
57156     57156     henan          111.5006       33.3175          107       166     2012      05        07        128              0.236958      28.427490       0.578200       0.149259   -9999.000000       0.110700       0.151100       0.450000
57156     57156     henan          111.5006       33.3175          107       166     2012      05        08        129              0.235750      24.318542       0.000000       0.158695       0.165000   -9999.000000       0.147600   -9999.000000
57156     57156     henan          111.5006       33.3175          107       166     2012      05        09        130              0.232250      28.237213       0.000000       0.150355   -9999.000000       0.133300       0.153200       0.561000
57156     57156     henan          111.5006       33.3175          107       166     2012      05        10        131              0.229625      27.028992       0.000000       0.143440       0.184000   -9999.000000       0.152700       0.360000
57156     57156     henan          111.5006       33.3175          107       166     2012      05        11        132              0.244125      28.505676      25.671257       0.136931       0.200000   -9999.000000   -9999.000000   -9999.000000
57156     57156     henan          111.5006       33.3175          107       166     2012      05        12        133              0.294250      26.977631       0.139261       0.208003       0.286000       0.107100   -9999.000000       0.411000
57156     57156     henan          111.5006       33.3175          107       166     2012      05        13        134              0.290833      18.660706       1.000100       0.266830   -9999.000000       0.061100       0.145100   -9999.000000
57156     57156     henan          111.5006       33.3175          107       166     2012      05        14        135              0.287042      20.596252       0.000000       0.246468       0.256000   -9999.000000       0.166700       0.380000
57156     57156     henan          111.5006       33.3175          107       166     2012      05        15        136              0.279750      22.978638       0.000000       0.230440       0.232000   -9999.000000       0.162100       0.249000
57156     57156     henan          111.5006       33.3175          107       166     2012      05        16        137              0.268667      23.768585       0.000000       0.214985       0.253000   -9999.000000       0.158100       0.543000
57156     57156     henan          111.5006       33.3175          107       166     2012      05        17        138              0.255500      25.218567       0.000000       0.200008       0.226000       0.118900   -9999.000000       0.289000
57156     57156     henan          111.5006       33.3175          107       166     2012      05        18        139              0.252583      26.307983       0.162457       0.185852       0.234000       0.089900   -9999.000000   -9999.000000
57156     57156     henan          111.5006       33.3175          107       166     2012      05        19        140              0.253292      24.516815       0.000000       0.181119       0.212000   -9999.000000       0.139000       0.428000
57156     57156     henan          111.5006       33.3175          107       166     2012      05        20        141              0.251042      26.919647       0.000000       0.170900   -9999.000000   -9999.000000       0.162800   -9999.000000
57156     57156     henan          111.5006       33.3175          107       166     2012      05        21        142              0.246625      26.762177       0.295863       0.161535       0.268000   -9999.000000       0.231500       0.321000
57156     57156     henan          111.5006       33.3175          107       166     2012      05        22        143              0.242250      24.449890       1.198880       0.159175       0.270500       0.103100       0.255700       0.470000
57156     57156     henan          111.5006       33.3175          107       166     2012      05        23        144              0.243667      21.686737       0.105674       0.178961   -9999.000000       0.067600   -9999.000000   -9999.000000
57156     57156     henan          111.5006       33.3175          107       166     2012      05        24        145              0.244042      22.310059       1.987405       0.176770   -9999.000000   -9999.000000       0.229600       0.640000
57156     57156     henan          111.5006       33.3175          107       166     2012      05        25        146              0.000000      21.321808       0.009247       0.195278   -9999.000000   -9999.000000       0.223100   -9999.000000
57156     57156     henan          111.5006       33.3175          107       166     2012      05        26        147              0.248167      22.278961       0.000000       0.184851       0.252000   -9999.000000       0.220900       0.307000
57156     57156     henan          111.5006       33.3175          107       166     2012      05        27        148              0.245042      26.285339       0.000000       0.167471       0.257000       0.101400       0.227900   -9999.000000
57156     57156     henan          111.5006       33.3175          107       166     2012      05        28        149              0.243750      24.936005      13.376511       0.159227       0.230000   -9999.000000   -9999.000000   -9999.000000
57156     57156     henan          111.5006       33.3175          107       166     2012      05        29        150              0.269583      25.519073       3.775548       0.201621       0.292000   -9999.000000   -9999.000000       0.543000
57156     57156     henan          111.5006       33.3175          107       166     2012      05        30        151              0.274125      22.836670       0.000000       0.264835   -9999.000000   -9999.000000       0.209300   -9999.000000
57156     57156     henan          111.5006       33.3175          107       166     2012      05        31        152              0.269708      26.139160       0.585971       0.227379       0.269000       0.116200       0.222600   -9999.000000
57156     57156     henan          111.5006       33.3175          107       166     2012      06        01        153              0.266958      24.032867       0.000000       0.216719       0.198500   -9999.000000       0.226600   -9999.000000
57156     57156     henan          111.5006       33.3175          107       166     2012      06        02        154              0.266250      23.574768       0.000000       0.208446       0.206500   -9999.000000       0.226000   -9999.000000
57156     57156     henan          111.5006       33.3175          107       166     2012      06        03        155              0.262250      25.969238       0.000000       0.192095       0.191000   -9999.000000   -9999.000000       0.291000
57156     57156     henan          111.5006       33.3175          107       166     2012      06        04        156              0.259833      25.090759       0.000000       0.182111       0.210000       0.040600       0.224500   -9999.000000
57156     57156     henan          111.5006       33.3175          107       166     2012      06        05        157              0.256208      26.990753       5.073107       0.170190       0.246000       0.219800       0.226700       0.777000
57156     57156     henan          111.5006       33.3175          107       166     2012      06        06        158              0.257667      24.976776       0.115326       0.195455       0.226000       0.162800       0.226700   -9999.000000
57156     57156     henan          111.5006       33.3175          107       166     2012      06        07        159              0.258125      26.016083       0.000000       0.211254       0.204000   -9999.000000       0.226600       0.493000
57156     57156     henan          111.5006       33.3175          107       166     2012      06        08        160              0.255917      28.174744       0.000000       0.185834       0.191000   -9999.000000       0.209900       0.473000
57156     57156     henan          111.5006       33.3175          107       166     2012      06        09        161              0.250875      29.494537       0.000000       0.164897       0.186000       0.096200   -9999.000000   -9999.000000
57156     57156     henan          111.5006       33.3175          107       166     2012      06        10        162              0.244250      31.161652       0.418216       0.150455   -9999.000000       0.174800       0.216000       0.447000
57156     57156     henan          111.5006       33.3175          107       166     2012      06        11        163              0.000000      30.451843       0.000000       0.145531       0.284000   -9999.000000       0.216700   -9999.000000
57156     57156     henan          111.5006       33.3175          107       166     2012      06        12        164              0.233042      29.858765       0.000000       0.139172       0.259500   -9999.000000       0.209300       0.328000
57156     57156     henan          111.5006       33.3175          107       166     2012      06        13        165              0.228250      32.309906       0.000000       0.131660       0.245000   -9999.000000       0.213400       0.451000
57156     57156     henan          111.5006       33.3175          107       166     2012      06        14        166              0.223292      34.002289       0.000000       0.128038       0.270000       0.428600   -9999.000000       0.537000
57156     57156     henan          111.5006       33.3175          107       166     2012      06        15        167              0.219458      32.531525       0.000000       0.125984   -9999.000000       0.218800   -9999.000000       0.313000
57156     57156     henan          111.5006       33.3175          107       166     2012      06        16        168              0.216208      32.609802       0.000000       0.123950       0.240000   -9999.000000       0.190500   -9999.000000
57156     57156     henan          111.5006       33.3175          107       166     2012      06        17        169              0.212875      32.693604       0.000000       0.122636       0.254000   -9999.000000       0.223200       0.427000
57156     57156     henan          111.5006       33.3175          107       166     2012      06        18        170              0.211917      31.730316       0.000000       0.122033       0.255500       0.041000       0.182700   -9999.000000
57156     57156     henan          111.5006       33.3175          107       166     2012      06        19        171              0.210417      33.009521       0.345080       0.120965       0.275000       0.162600       0.171000       0.486000
57156     57156     henan          111.5006       33.3175          107       166     2012      06        20        172              0.208625      31.672150      39.347813       0.123428       0.358000   -9999.000000   -9999.000000       0.224000
57156     57156     henan          111.5006       33.3175          107       166     2012      06        21        173              0.207875      31.625916       0.000000       0.121557       0.220000   -9999.000000       0.195600   -9999.000000
57156     57156     henan          111.5006       33.3175          107       166     2012      06        22        174              0.206833      33.371979       1.480322       0.118388       0.210000   -9999.000000       0.182700       0.452000
57156     57156     henan          111.5006       33.3175          107       166     2012      06        23        175              0.205250      34.277924       0.000000       0.117910       0.254000       0.076300       0.200600   -9999.000000
57156     57156     henan          111.5006       33.3175          107       166     2012      06        24        176              0.203583      34.607666       0.127857       0.117528       0.237000   -9999.000000       0.189700       0.432000
57156     57156     henan          111.5006       33.3175          107       166     2012      06        25        177              0.218375      33.648712      16.864649       0.117357       0.260000   -9999.000000       0.119700   -9999.000000
57156     57156     henan          111.5006       33.3175          107       166     2012      06        26        178              0.248143      29.967285       0.082793       0.225441       0.322000   -9999.000000   -9999.000000   -9999.000000
57156     57156     henan          111.5006       33.3175          107       166     2012      06        27        179              0.246667      28.536438       0.507460       0.229320       0.354000   -9999.000000       0.140900       0.703000
57156     57156     henan          111.5006       33.3175          107       166     2012      06        28        180              0.244500      27.828674       0.952597       0.202016       0.328500   -9999.000000       0.145900   -9999.000000
57156     57156     henan          111.5006       33.3175          107       166     2012      06        29        181              0.256833      26.633911      17.497091       0.196278       0.280000       0.122000       0.141200       0.717000
57156     57156     henan          111.5006       33.3175          107       166     2012      06        30        182              0.285458      27.298706      16.012371       0.249959   -9999.000000   -9999.000000       0.141300   -9999.000000
57156     57156     henan          111.5006       33.3175          107       166     2012      07        01        183              0.281542      25.241974       1.926348       0.301871   -9999.000000   -9999.000000   -9999.000000   -9999.000000
57156     57156     henan          111.5006       33.3175          107       166     2012      07        02        184              0.287167      26.383820      26.508343       0.269294       0.248000   -9999.000000   -9999.000000       1.000000
57156     57156     henan          111.5006       33.3175          107       166     2012      07        03        185              0.286208      24.610352       2.131734       0.319446       0.196000       0.298000       0.082000   -9999.000000
57156     57156     henan          111.5006       33.3175          107       166     2012      07        04        186              0.287583      26.829346      32.015160       0.294222   -9999.000000   -9999.000000       0.098200       1.000000
57156     57156     henan          111.5006       33.3175          107       166     2012      07        05        187              0.284000      26.546875       0.183259       0.323236       0.235000       0.074100       0.096900   -9999.000000
57156     57156     henan          111.5006       33.3175          107       166     2012      07        06        188              0.279250      27.538086       0.248318       0.305595   -9999.000000       0.032900       0.094100       0.651000
57156     57156     henan          111.5006       33.3175          107       166     2012      07        07        189              0.275042      28.436707       0.126605       0.287027   -9999.000000   -9999.000000   -9999.000000       0.656000
57156     57156     henan          111.5006       33.3175          107       166     2012      07        08        190              0.280333      29.177826      35.774261       0.278960       0.189000       0.275400       0.100300   -9999.000000
57156     57156     henan          111.5006       33.3175          107       166     2012      07        09        191              0.288833      29.926819      32.747181       0.316101       0.210000   -9999.000000       0.176200       1.000000
57156     57156     henan          111.5006       33.3175          107       166     2012      07        10        192              0.284542      29.598572       0.000000       0.342958       0.208000   -9999.000000       0.165100   -9999.000000
57156     57156     henan          111.5006       33.3175          107       166     2012      07        11        193              0.279833      30.159180       0.000000       0.310805       0.240000       0.091000       0.169500       0.659000
57156     57156     henan          111.5006       33.3175          107       166     2012      07        12        194              0.274583      31.362976       0.101518       0.292978       0.241000       0.030800   -9999.000000       0.644000
57156     57156     henan          111.5006       33.3175          107       166     2012      07        13        195              0.269750      30.419464       2.542777       0.283383       0.293000   -9999.000000   -9999.000000       0.806000
57156     57156     henan          111.5006       33.3175          107       166     2012      07        14        196              0.266792      28.576508       2.884309       0.285798       0.290000   -9999.000000       0.158000       0.717000
57156     57156     henan          111.5006       33.3175          107       166     2012      07        15        197              0.262583      28.108063       0.230078       0.285465       0.268500   -9999.000000       0.162300   -9999.000000
57156     57156     henan          111.5006       33.3175          107       166     2012      07        16        198              0.260125      27.421051       0.483667       0.276497       0.262000       0.144600       0.236600       0.633000
57156     57156     henan          111.5006       33.3175          107       166     2012      07        17        199              0.258250      27.255249       0.000000       0.271295   -9999.000000       0.273300       0.234800   -9999.000000
57156     57156     henan          111.5006       33.3175          107       166     2012      07        18        200              0.258625      28.110657       0.000000       0.263019       0.275000   -9999.000000   -9999.000000       0.490000
57156     57156     henan          111.5006       33.3175          107       166     2012      07        19        201              0.257958      28.549744       0.038295       0.255331       0.224000   -9999.000000   -9999.000000       0.448000
57156     57156     henan          111.5006       33.3175          107       166     2012      07        20        202              0.255667      29.186798       1.804897       0.247518       0.273500       0.204800       0.219900   -9999.000000
57156     57156     henan          111.5006       33.3175          107       166     2012      07        21        203              0.259833      29.877930      25.582018       0.248913       0.323000       0.053900       0.238500       0.692000
57156     57156     henan          111.5006       33.3175          107       166     2012      07        22        204              0.276625      29.611816       0.045505       0.293200       0.367000   -9999.000000       0.237600   -9999.000000
57156     57156     henan          111.5006       33.3175          107       166     2012      07        23        205              0.271542      27.981720       0.056130       0.292410       0.334000       0.150700       0.240400       0.599000
57156     57156     henan          111.5006       33.3175          107       166     2012      07        24        206              0.269375      29.391083       3.143462       0.272215       0.392000       0.234600   -9999.000000   -9999.000000
57156     57156     henan          111.5006       33.3175          107       166     2012      07        25        207              0.269708      27.930298       2.004157       0.279352       0.372000       0.147200       0.234900   -9999.000000
57156     57156     henan          111.5006       33.3175          107       166     2012      07        26        208              0.265583      30.579102       0.000000       0.265744       0.334500   -9999.000000       0.233100       0.631000
57156     57156     henan          111.5006       33.3175          107       166     2012      07        27        209              0.259542      31.400513       0.000000       0.253155       0.335000   -9999.000000       0.241300   -9999.000000
57156     57156     henan          111.5006       33.3175          107       166     2012      07        28        210              0.257792      30.911835       0.000000       0.242844   -9999.000000       0.081100       0.249200       0.563000
57156     57156     henan          111.5006       33.3175          107       166     2012      07        29        211              0.256042      31.504547       0.081421       0.232474       0.324000       0.207800   -9999.000000   -9999.000000
57156     57156     henan          111.5006       33.3175          107       166     2012      07        30        212              0.253708      32.343170       0.403476       0.223674       0.339000   -9999.000000   -9999.000000   -9999.000000
57156     57156     henan          111.5006       33.3175          107       166     2012      07        31        213              0.258958      32.097046      13.396439       0.216433       0.254000   -9999.000000       0.166700       0.908000
57156     57156     henan          111.5006       33.3175          107       166     2012      08        01        214              0.271958      30.450806       8.365795       0.258039       0.350000   -9999.000000       0.176500   -9999.000000
57156     57156     henan          111.5006       33.3175          107       166     2012      08        02        215              0.266708      29.598541       0.483127       0.286363   -9999.000000       0.072700       0.162400       0.704000
57156     57156     henan          111.5006       33.3175          107       166     2012      08        03        216              0.262125      29.934753       0.127148       0.266421       0.359000       0.126200       0.166300   -9999.000000
57156     57156     henan          111.5006       33.3175          107       166     2012      08        04        217              0.258417      30.078766       4.827798       0.252953       0.318000       0.079300   -9999.000000       0.661000
57156     57156     henan          111.5006       33.3175          107       166     2012      08        05        218              0.277292      29.888580       4.241606       0.258726       0.395000   -9999.000000   -9999.000000       0.876000
57156     57156     henan          111.5006       33.3175          107       166     2012      08        06        219              0.279625      28.623627       1.072949       0.275811       0.362500   -9999.000000       0.215100   -9999.000000
57156     57156     henan          111.5006       33.3175          107       166     2012      08        07        220              0.273792      29.383240       0.000000       0.256509       0.339000       0.178300       0.236100       0.506000
57156     57156     henan          111.5006       33.3175          107       166     2012      08        08        221              0.271333      30.560425       0.750394       0.242319   -9999.000000       0.039700       0.245600   -9999.000000
57156     57156     henan          111.5006       33.3175          107       166     2012      08        09        222              0.269625      30.637451       0.000000       0.230322       0.401000   -9999.000000       0.234400       0.509000
57156     57156     henan          111.5006       33.3175          107       166     2012      08        10        223              0.267696      30.983490       0.740696       0.217347       0.329000       0.114700   -9999.000000       0.620000
57156     57156     henan          111.5006       33.3175          107       166     2012      08        11        224              0.265542      30.793243       0.000000       0.205845       0.325000       0.147300       0.224600       0.615000
57156     57156     henan          111.5006       33.3175          107       166     2012      08        12        225              0.274792      31.310791      89.669006       0.194752       0.292000   -9999.000000       0.275300       0.955000
57156     57156     henan          111.5006       33.3175          107       166     2012      08        13        226              0.287000      31.006195       2.169204       0.338176   -9999.000000       0.138600       0.163800   -9999.000000
57156     57156     henan          111.5006       33.3175          107       166     2012      08        14        227              0.283375      26.666412       0.175733       0.336187       0.348000   -9999.000000       0.166200       0.696000
57156     57156     henan          111.5006       33.3175          107       166     2012      08        15        228              0.280583      27.258606       0.049410       0.300214       0.328500   -9999.000000   -9999.000000   -9999.000000
57156     57156     henan          111.5006       33.3175          107       166     2012      08        16        229              0.276750      28.995636       0.000000       0.287617       0.333500       0.056700   -9999.000000       0.604000
57156     57156     henan          111.5006       33.3175          107       166     2012      08        17        230              0.273667      28.447388       4.792264       0.277205       0.331000   -9999.000000       0.138800       0.505000
57156     57156     henan          111.5006       33.3175          107       166     2012      08        18        231              0.271333      28.860870       0.592239       0.269960       0.309000       0.136000       0.152400   -9999.000000
57156     57156     henan          111.5006       33.3175          107       166     2012      08        19        232              0.273833      29.532654      11.820855       0.264341   -9999.000000   -9999.000000       0.151600       0.721000
57156     57156     henan          111.5006       33.3175          107       166     2012      08        20        233              0.288667      27.674072      11.891342       0.282047       0.400000   -9999.000000       0.213800   -9999.000000
57156     57156     henan          111.5006       33.3175          107       166     2012      08        21        234              0.284083      26.673553       5.423069       0.314332       0.336000   -9999.000000   -9999.000000       0.865000
57156     57156     henan          111.5006       33.3175          107       166     2012      08        22        235              0.281000      27.067657       0.000000       0.298184       0.315000       0.157800       0.255000   -9999.000000
57156     57156     henan          111.5006       33.3175          107       166     2012      08        23        236              0.277417      23.700104       0.000000       0.287996       0.271000       0.164200       0.234800   -9999.000000
57156     57156     henan          111.5006       33.3175          107       166     2012      08        24        237              0.274000      23.689423       0.000000       0.274546   -9999.000000   -9999.000000       0.248300       0.540000
57156     57156     henan          111.5006       33.3175          107       166     2012      08        25        238              0.000000      25.352051       0.000000       0.266519       0.308000       0.170200       0.249500   -9999.000000
57156     57156     henan          111.5006       33.3175          107       166     2012      08        26        239              0.268167      25.035675       0.000000       0.262834       0.280500       0.171800       0.253100       0.538000
57156     57156     henan          111.5006       33.3175          107       166     2012      08        27        240              0.266625      25.774719       0.000000       0.259002       0.252000   -9999.000000   -9999.000000   -9999.000000
57156     57156     henan          111.5006       33.3175          107       166     2012      08        28        241              0.265750      27.123474       0.513325       0.251354       0.289000       0.117800       0.209300   -9999.000000
57156     57156     henan          111.5006       33.3175          107       166     2012      08        29        242              0.263750      27.810669       0.000000       0.247390   -9999.000000   -9999.000000       0.217700       0.562000
57156     57156     henan          111.5006       33.3175          107       166     2012      08        30        243              0.261542      28.618927       2.719378       0.237585   -9999.000000       0.032600       0.209000   -9999.000000
57156     57156     henan          111.5006       33.3175          107       166     2012      08        31        244              0.269458      28.854218      15.222886       0.238449       0.352000       0.178500       0.260700       0.789000
57156     57156     henan          111.5006       33.3175          107       166     2012      09        01        245              0.286708      24.713989      24.124420       0.298880       0.318000   -9999.000000   -9999.000000   -9999.000000
57156     57156     henan          111.5006       33.3175          107       166     2012      09        02        246              0.285667      24.979645       0.233623       0.315195       0.287500       0.150400   -9999.000000       0.713000
57156     57156     henan          111.5006       33.3175          107       166     2012      09        03        247              0.280909      23.305084       0.000000       0.300828       0.260000       0.098800       0.192200       0.573000
57156     57156     henan          111.5006       33.3175          107       166     2012      09        04        248              0.278167      24.851074       0.671706       0.282111   -9999.000000       0.038300       0.214500   -9999.000000
57156     57156     henan          111.5006       33.3175          107       166     2012      09        05        249              0.275083      25.467133       3.432180       0.271319       0.293000   -9999.000000       0.208200       0.518000
57156     57156     henan          111.5006       33.3175          107       166     2012      09        06        250              0.270750      26.113617       0.000000       0.263011       0.259000   -9999.000000       0.223300   -9999.000000
57156     57156     henan          111.5006       33.3175          107       166     2012      09        07        251              0.278167      24.181488      54.304848       0.258740       0.266000       0.136700   -9999.000000       0.891000
57156     57156     henan          111.5006       33.3175          107       166     2012      09        08        252              0.291292      25.901245       5.672950       0.304404   -9999.000000   -9999.000000       0.227800       0.884000
57156     57156     henan          111.5006       33.3175          107       166     2012      09        09        253              0.286958      23.715271       0.000000       0.328500   -9999.000000       0.081200       0.222900       0.795000
57156     57156     henan          111.5006       33.3175          107       166     2012      09        10        254              0.283375      24.928101       2.325865       0.303007       0.318000       0.221800       0.244900       0.573000
57156     57156     henan          111.5006       33.3175          107       166     2012      09        11        255              0.292167      23.637665      15.632938       0.296584       0.237000   -9999.000000       0.242000   -9999.000000
57156     57156     henan          111.5006       33.3175          107       166     2012      09        12        256              0.289833      21.973480       0.105861       0.323293       0.256000       0.116400   -9999.000000       0.595000
57156     57156     henan          111.5006       33.3175          107       166     2012      09        13        257              0.287208      19.760101       0.000000       0.299806       0.209000       0.142800   -9999.000000   -9999.000000
57156     57156     henan          111.5006       33.3175          107       166     2012      09        14        258              0.283167      20.613098       0.000000       0.287500       0.225000   -9999.000000       0.203000       0.482000
57156     57156     henan          111.5006       33.3175          107       166     2012      09        15        259              0.279250      21.107147       0.123517       0.279740   -9999.000000       0.238800       0.219300       0.427000
57156     57156     henan          111.5006       33.3175          107       166     2012      09        16        260              0.274958      21.609802       0.000000       0.273740       0.257000   -9999.000000       0.205800   -9999.000000
57156     57156     henan          111.5006       33.3175          107       166     2012      09        17        261              0.270542      22.048737       0.000000       0.270130       0.231000   -9999.000000       0.197800       0.518000
57156     57156     henan          111.5006       33.3175          107       166     2012      09        18        262              0.266917      22.464996       1.023898       0.265542       0.222000       0.082300   -9999.000000   -9999.000000
57156     57156     henan          111.5006       33.3175          107       166     2012      09        19        263              0.262500      22.615295       0.000000       0.264696       0.213000   -9999.000000   -9999.000000       0.505000
57156     57156     henan          111.5006       33.3175          107       166     2012      09        20        264              0.258458      23.632355       0.154797       0.258900   -9999.000000       0.136000       0.174200   -9999.000000
57156     57156     henan          111.5006       33.3175          107       166     2012      09        21        265              0.254542      24.126404       0.000000       0.255639   -9999.000000       0.008400       0.214300   -9999.000000
57156     57156     henan          111.5006       33.3175          107       166     2012      09        22        266              0.251333      23.275238       0.000000       0.255669       0.205500       0.027100       0.200600       0.497000
57156     57156     henan          111.5006       33.3175          107       166     2012      09        23        267              0.247500      24.482330       0.123051       0.251152       0.218000       0.196900       0.201800   -9999.000000
57156     57156     henan          111.5006       33.3175          107       166     2012      09        24        268              0.244625      23.931946       0.239364       0.250070       0.235000   -9999.000000   -9999.000000       0.471000
57156     57156     henan          111.5006       33.3175          107       166     2012      09        25        269              0.242000      24.106201       2.033792       0.245133   -9999.000000       0.210700       0.181000   -9999.000000
57156     57156     henan          111.5006       33.3175          107       166     2012      09        26        270              0.242167      22.550232       0.286267       0.255124       0.235000       0.231100       0.182000   -9999.000000
57156     57156     henan          111.5006       33.3175          107       166     2012      09        27        271              0.244500      22.480072       0.000000       0.255599       0.215500   -9999.000000       0.178900       0.526000
57156     57156     henan          111.5006       33.3175          107       166     2012      09        28        272              0.243200      23.634338       0.116227       0.247217       0.214000   -9999.000000       0.184000   -9999.000000
57156     57156     henan          111.5006       33.3175          107       166     2012      09        29        273              0.242667      20.517426       0.000000       0.238565       0.223500   -9999.000000   -9999.000000       0.340000
57156     57156     henan          111.5006       33.3175          107       166     2012      09        30        274              0.241875      20.679352       0.000000       0.235006       0.225000   -9999.000000   -9999.000000   -9999.000000
57156     57156     henan          111.5006       33.3175          107       166     2012      10        01        275              0.240625      20.630493       0.000000       0.231217   -9999.000000   -9999.000000       0.118900       0.447000
57156     57156     henan          111.5006       33.3175          107       166     2012      10        02        276              0.238958      21.121246       1.472683       0.227403       0.227000   -9999.000000       0.133000       0.519000
57156     57156     henan          111.5006       33.3175          107       166     2012      10        03        277              0.239625      21.152191       0.000000       0.232236       0.206000       0.132600       0.124700   -9999.000000
57156     57156     henan          111.5006       33.3175          107       166     2012      10        04        278              0.239292      21.798157       0.032090       0.230212       0.209500   -9999.000000       0.131000       0.460000
57156     57156     henan          111.5006       33.3175          107       166     2012      10        05        279              0.239500      21.274841       0.000000       0.228273       0.243000   -9999.000000   -9999.000000   -9999.000000
57156     57156     henan          111.5006       33.3175          107       166     2012      10        06        280              0.238000      20.128021       0.000000       0.228901   -9999.000000       0.119400   -9999.000000       0.344000
57156     57156     henan          111.5006       33.3175          107       166     2012      10        07        281              0.237125      20.139038       0.000000       0.227961       0.234000   -9999.000000       0.119200       0.374000
57156     57156     henan          111.5006       33.3175          107       166     2012      10        08        282              0.236750      19.769989       0.232725       0.228881       0.249000       0.102600       0.094300       0.419000
57156     57156     henan          111.5006       33.3175          107       166     2012      10        09        283              0.237208      19.787659       0.000000       0.230702       0.222500       0.238800       0.090200       0.220000
57156     57156     henan          111.5006       33.3175          107       166     2012      10        10        284              0.235333      20.517334       0.000000       0.224418       0.210000       0.112700       0.094700   -9999.000000
57156     57156     henan          111.5006       33.3175          107       166     2012      10        11        285              0.233292      19.934753       0.000000       0.220183       0.171000   -9999.000000   -9999.000000       0.407000
57156     57156     henan          111.5006       33.3175          107       166     2012      10        12        286              0.231708      19.178497       0.000000       0.219974       0.160000   -9999.000000       0.087800   -9999.000000
57156     57156     henan          111.5006       33.3175          107       166     2012      10        13        287              0.231042      18.886444       0.000000       0.221390       0.177000       0.036700       0.091900       0.351000
57156     57156     henan          111.5006       33.3175          107       166     2012      10        14        288              0.229917      19.864410       0.000000       0.220026       0.172000       0.095800       0.095500       0.247000
57156     57156     henan          111.5006       33.3175          107       166     2012      10        15        289              0.230958      19.681702       6.737278       0.217417       0.204000       0.257000       0.183600   -9999.000000
57156     57156     henan          111.5006       33.3175          107       166     2012      10        16        290              0.239208      18.493561       0.000000       0.253069       0.191000       0.181300   -9999.000000       0.482000
57156     57156     henan          111.5006       33.3175          107       166     2012      10        17        291              0.240750      16.346558       0.000000       0.247059   -9999.000000   -9999.000000   -9999.000000   -9999.000000
57156     57156     henan          111.5006       33.3175          107       166     2012      10        18        292              0.241083      17.009827       0.000000       0.236963       0.168000       0.051400       0.131500       0.378000
57156     57156     henan          111.5006       33.3175          107       166     2012      10        19        293              0.240750      17.079132       0.000000       0.234763       0.162000       0.097900       0.151300   -9999.000000
57156     57156     henan          111.5006       33.3175          107       166     2012      10        20        294              0.240292      17.938934       0.000000       0.232229       0.150000   -9999.000000       0.148800   -9999.000000
57156     57156     henan          111.5006       33.3175          107       166     2012      10        21        295              0.238458      19.787903       0.920442       0.228409       0.217000       0.239700       0.159600       0.579000
57156     57156     henan          111.5006       33.3175          107       166     2012      10        22        296              0.236750      17.274200       0.000000       0.234129   -9999.000000   -9999.000000   -9999.000000   -9999.000000
57156     57156     henan          111.5006       33.3175          107       166     2012      10        23        297              0.235833      16.021576       2.322878       0.229641   -9999.000000   -9999.000000       0.167400       0.632000
57156     57156     henan          111.5006       33.3175          107       166     2012      10        24        298              0.236917      14.207306       0.000000       0.238514   -9999.000000       0.147300       0.148900   -9999.000000
57156     57156     henan          111.5006       33.3175          107       166     2012      10        25        299              0.000000      16.231720       0.528847       0.237883       0.233000   -9999.000000       0.163400   -9999.000000
57156     57156     henan          111.5006       33.3175          107       166     2012      10        26        300              0.236875      17.873749       0.000000       0.232534       0.226500       0.101900       0.172100       0.463000
57156     57156     henan          111.5006       33.3175          107       166     2012      10        27        301              0.236708      16.543884       0.000000       0.232165       0.223000       0.077400       0.161500   -9999.000000
57156     57156     henan          111.5006       33.3175          107       166     2012      10        28        302              0.000000      18.326385       1.551051       0.228936   -9999.000000   -9999.000000   -9999.000000       0.286000
57156     57156     henan          111.5006       33.3175          107       166     2012      10        29        303              0.236417      17.599243       2.909404       0.233492       0.251000   -9999.000000       0.167400   -9999.000000
57156     57156     henan          111.5006       33.3175          107       166     2012      10        30        304              0.236708      15.002289       0.000000       0.256310       0.217000   -9999.000000       0.177200       0.437000
57156     57156     henan          111.5006       33.3175          107       166     2012      10        31        305              0.236750      15.036591       0.000000       0.243910       0.218500       0.117200       0.166400       0.300000
57156     57156     henan          111.5006       33.3175          107       166     2012      11        01        306              0.236917      14.704010       0.000000       0.237078       0.175000       0.028600       0.182700   -9999.000000
57156     57156     henan          111.5006       33.3175          107       166     2012      11        02        307              0.239417      14.746765      12.816303       0.234952   -9999.000000       0.107100   -9999.000000       0.291000
57156     57156     henan          111.5006       33.3175          107       166     2012      11        03        308              0.265542      15.796783       0.543638       0.253721   -9999.000000       0.154100   -9999.000000   -9999.000000
57156     57156     henan          111.5006       33.3175          107       166     2012      11        04        309              0.261750      11.143982       0.000000       0.277511       0.166000   -9999.000000       0.153000       0.423000
57156     57156     henan          111.5006       33.3175          107       166     2012      11        05        310              0.259458      10.821198       0.000000       0.260715       0.207500   -9999.000000       0.166900       0.289000
57156     57156     henan          111.5006       33.3175          107       166     2012      11        06        311              0.257625      11.382294       0.913790       0.254880       0.178000       0.184600       0.162300       0.344000
57156     57156     henan          111.5006       33.3175          107       166     2012      11        07        312              0.256667      12.206329       0.353983       0.251544       0.211000   -9999.000000       0.177700       0.250000
57156     57156     henan          111.5006       33.3175          107       166     2012      11        08        313              0.256375      11.236053       0.000000       0.252825       0.193000   -9999.000000   -9999.000000   -9999.000000
57156     57156     henan          111.5006       33.3175          107       166     2012      11        09        314              0.255208      11.988739       0.241233       0.252491       0.241000   -9999.000000       0.177000       0.425000
57156     57156     henan          111.5006       33.3175          107       166     2012      11        10        315              0.253458      10.954254       0.000000       0.252997       0.200000       0.132600       0.155400   -9999.000000
57156     57156     henan          111.5006       33.3175          107       166     2012      11        11        316              0.250833       9.743347       0.766867       0.251021       0.144000       0.132900       0.167400       0.188000
57156     57156     henan          111.5006       33.3175          107       166     2012      11        12        317              0.249375      10.266327       0.000000       0.247548       0.146000   -9999.000000       0.145400       0.067000
57156     57156     henan          111.5006       33.3175          107       166     2012      11        13        318              0.000000      10.256012       0.000000       0.246733   -9999.000000       0.215800   -9999.000000   -9999.000000
57156     57156     henan          111.5006       33.3175          107       166     2012      11        14        319              0.247000      11.654419       0.000000       0.244751       0.151000       0.249000   -9999.000000       0.186000
57156     57156     henan          111.5006       33.3175          107       166     2012      11        15        320              0.246458       9.875092       0.430016       0.246531       0.146500       0.007500       0.125600   -9999.000000
57156     57156     henan          111.5006       33.3175          107       166     2012      11        16        321              0.245174       9.366211       0.000000       0.248144       0.141000   -9999.000000       0.135500       0.190000
57156     57156     henan          111.5006       33.3175          107       166     2012      11        17        322              0.000000      10.217682       0.000000       0.245638       0.137000   -9999.000000       0.127500   -9999.000000
57156     57156     henan          111.5006       33.3175          107       166     2012      11        18        323              0.243417      10.953369       0.000000       0.243812   -9999.000000       0.140400       0.142400   -9999.000000
57156     57156     henan          111.5006       33.3175          107       166     2012      11        19        324              0.242208      11.167419       0.000000       0.243508       0.147000       0.083000   -9999.000000       0.173000
57156     57156     henan          111.5006       33.3175          107       166     2012      11        20        325              0.241625      11.133606       0.000000       0.243155       0.153000       0.153400   -9999.000000   -9999.000000
57156     57156     henan          111.5006       33.3175          107       166     2012      11        21        326              0.240333       9.981781       0.000000       0.244214       0.137000       0.136000       0.082500       0.138000
57156     57156     henan          111.5006       33.3175          107       166     2012      11        22        327              0.238458      11.000732       0.000000       0.243732       0.138500   -9999.000000       0.097100   -9999.000000
57156     57156     henan          111.5006       33.3175          107       166     2012      11        23        328              0.237083       9.386749       0.000000       0.243767       0.141000       0.048200       0.091400   -9999.000000
57156     57156     henan          111.5006       33.3175          107       166     2012      11        24        329              0.236292       8.296661       0.734646       0.241898   -9999.000000       0.069700       0.102700       0.119000
57156     57156     henan          111.5006       33.3175          107       166     2012      11        25        330              0.236042       6.942657       0.587151       0.243848   -9999.000000       0.098900   -9999.000000   -9999.000000
57156     57156     henan          111.5006       33.3175          107       166     2012      11        26        331              0.235130       6.817810       0.222969       0.250609       0.119000   -9999.000000   -9999.000000       0.162000
57156     57156     henan          111.5006       33.3175          107       166     2012      11        27        332              0.235167       7.040253       0.043471       0.244711       0.132500   -9999.000000       0.070200   -9999.000000
57156     57156     henan          111.5006       33.3175          107       166     2012      11        28        333              0.235125       8.250061       0.000000       0.243981       0.133000       0.411500       0.074200       0.241000
57156     57156     henan          111.5006       33.3175          107       166     2012      11        29        334              0.233375       7.429871       0.040317       0.243598   -9999.000000       0.125000       0.079800       0.149000
57156     57156     henan          111.5006       33.3175          107       166     2012      11        30        335              0.233458       5.487885       1.851023       0.244385       0.150000   -9999.000000   -9999.000000   -9999.000000
57156     57156     henan          111.5006       33.3175          107       166     2012      12        01        336              0.234500       7.093353       2.688629       0.247707   -9999.000000       0.182800   -9999.000000       0.323000
57156     57156     henan          111.5006       33.3175          107       166     2012      12        02        337              0.236042       4.813232       0.079492       0.268784       0.132000       0.062300       0.064700   -9999.000000
57156     57156     henan          111.5006       33.3175          107       166     2012      12        03        338              0.236583       5.142578       0.000000       0.259134       0.129000   -9999.000000       0.067600       0.212000
57156     57156     henan          111.5006       33.3175          107       166     2012      12        04        339              0.236417       6.764465       0.233604       0.253851       0.141000   -9999.000000       0.067100       0.212000
57156     57156     henan          111.5006       33.3175          107       166     2012      12        05        340              0.236458       5.123688       0.079254       0.253271   -9999.000000   -9999.000000       0.069400       0.313000
57156     57156     henan          111.5006       33.3175          107       166     2012      12        06        341              0.236417       7.065613       0.000000       0.250143       0.137000       0.095300   -9999.000000       0.131000
57156     57156     henan          111.5006       33.3175          107       166     2012      12        07        342              0.236042       7.691193       0.000000       0.248821       0.123000       0.040600       0.067600   -9999.000000
57156     57156     henan          111.5006       33.3175          107       166     2012      12        08        343              0.235750       8.048645       0.000000       0.247556       0.130000       0.089700       0.057300       0.122000
57156     57156     henan          111.5006       33.3175          107       166     2012      12        09        344              0.234917       6.644440       0.000000       0.246290       0.129000       0.155700       0.067100   -9999.000000
57156     57156     henan          111.5006       33.3175          107       166     2012      12        10        345              0.233292       5.699249       0.000000       0.245360   -9999.000000   -9999.000000       0.056400       0.046000
57156     57156     henan          111.5006       33.3175          107       166     2012      12        11        346              0.232208       4.253143       0.000000       0.241671   -9999.000000       0.097500       0.052600       0.053000
57156     57156     henan          111.5006       33.3175          107       166     2012      12        12        347              0.232000       3.649445       0.048894       0.240816       0.118000       0.099100   -9999.000000   -9999.000000
57156     57156     henan          111.5006       33.3175          107       166     2012      12        13        348              0.232250       2.857117       3.922191       0.243709       0.145000   -9999.000000       0.053300       0.400000
57156     57156     henan          111.5006       33.3175          107       166     2012      12        14        349              0.234625       2.803345       0.107347       0.264775       0.127000   -9999.000000       0.057100   -9999.000000
57156     57156     henan          111.5006       33.3175          107       166     2012      12        15        350              0.000000       3.440948       0.342395       0.260812   -9999.000000   -9999.000000       0.056900       0.404000
57156     57156     henan          111.5006       33.3175          107       166     2012      12        16        351              0.237417       2.795685       0.078861       0.257957       0.126000   -9999.000000       0.058900   -9999.000000
57156     57156     henan          111.5006       33.3175          107       166     2012      12        17        352              0.238000       3.932922       1.419656       0.258409       0.112000       0.113000   -9999.000000   -9999.000000
57156     57156     henan          111.5006       33.3175          107       166     2012      12        18        353              0.239583       3.707886       0.000000       0.263164       0.125000   -9999.000000   -9999.000000       0.174000
57156     57156     henan          111.5006       33.3175          107       166     2012      12        19        354              0.239667       3.069580       0.599868       0.254500   -9999.000000       0.131500       0.044900   -9999.000000
57156     57156     henan          111.5006       33.3175          107       166     2012      12        20        355              0.000000       2.975372       0.259999       0.251739   -9999.000000   -9999.000000       0.049300       0.314000
57156     57156     henan          111.5006       33.3175          107       166     2012      12        21        356              0.251583       1.376892       3.488364       0.232350   -9999.000000   -9999.000000       0.048900   -9999.000000
57156     57156     henan          111.5006       33.3175          107       166     2012      12        22        357              0.251917       2.222717       0.150772       0.255343   -9999.000000       0.133100       0.051000   -9999.000000
57156     57156     henan          111.5006       33.3175          107       166     2012      12        23        358              0.250417       3.008301       0.825706       0.240810       0.097000   -9999.000000   -9999.000000       0.035000
57156     57156     henan          111.5006       33.3175          107       166     2012      12        24        359              0.247524       0.865112       0.092637       0.200569       0.098000   -9999.000000       0.052800   -9999.000000
57156     57156     henan          111.5006       33.3175          107       166     2012      12        25        360              0.247000       1.580750       0.182031       0.213658   -9999.000000       0.014100       0.048800       0.006000
57156     57156     henan          111.5006       33.3175          107       166     2012      12        26        361              0.000000       1.386475       0.000000       0.215691   -9999.000000   -9999.000000       0.053900   -9999.000000
57156     57156     henan          111.5006       33.3175          107       166     2012      12        27        362              0.247000       0.586334       0.175189       0.198521   -9999.000000       0.261800       0.057700   -9999.000000
57156     57156     henan          111.5006       33.3175          107       166     2012      12        28        363              0.247000       1.065735       0.595691       0.213820   -9999.000000   -9999.000000   -9999.000000       0.078000
57156     57156     henan          111.5006       33.3175          107       166     2012      12        29        364              0.000000       0.986176       0.000000       0.216553   -9999.000000       0.145700   -9999.000000   -9999.000000
57156     57156     henan          111.5006       33.3175          107       166     2012      12        30        365              0.000000       0.144165       0.000000       0.188662       0.101000       0.020400       0.045800       0.001000
57156     57156     henan          111.5006       33.3175          107       166     2012      12        31        366              0.241467       0.626282       0.000000       0.189386       0.111000       0.327900       0.050400   -9999.000000
