# Supplementary material for: Research on Fusing Multisatellite Soil Moisture Data Based on Bayesian Model Averaging
Source: Hindawi journal article supplement (doi:10.1155/2018/9310838), 2018-06-25
Supplement: f1 [file 9310838.f1.zip › 2012_sm00-10cm_daily_ZDB_ZHY_57177_366days_allin.txt]

57177     57177     henan          113.5381       33.3411          107       174     2012      01        01        001              0.000000   -9999.000000       0.038018   -9999.000000   -9999.000000   -9999.000000       0.095300   -9999.000000
57177     57177     henan          113.5381       33.3411          107       174     2012      01        02        002              0.307333       0.564484       0.000000       0.186874       0.095000       0.117000       0.154700       0.313000
57177     57177     henan          113.5381       33.3411          107       174     2012      01        03        003              0.000000       2.475494       0.000000       0.232069   -9999.000000       0.125200   -9999.000000       0.216000
57177     57177     henan          113.5381       33.3411          107       174     2012      01        04        004              0.303458       2.319000       0.000000       0.213660   -9999.000000       0.184400       0.140800   -9999.000000
57177     57177     henan          113.5381       33.3411          107       174     2012      01        05        005              0.301625       0.918243       0.000000       0.181361   -9999.000000       0.138600       0.115800       0.014000
57177     57177     henan          113.5381       33.3411          107       174     2012      01        06        006              0.301583       0.952515       0.000000       0.181582   -9999.000000   -9999.000000       0.131600   -9999.000000
57177     57177     henan          113.5381       33.3411          107       174     2012      01        07        007              0.301583       1.500824       0.000000       0.191937   -9999.000000       0.292400       0.159300       0.192000
57177     57177     henan          113.5381       33.3411          107       174     2012      01        08        008              0.000000       1.029877       0.000000       0.196881       0.091000       0.074800       0.151600       0.062000
57177     57177     henan          113.5381       33.3411          107       174     2012      01        09        009              0.301833       2.544800       0.000000       0.209322       0.093000   -9999.000000   -9999.000000   -9999.000000
57177     57177     henan          113.5381       33.3411          107       174     2012      01        10        010              0.301792       2.573578       0.000000       0.211094   -9999.000000       0.185300       0.059800       0.154000
57177     57177     henan          113.5381       33.3411          107       174     2012      01        11        011              0.301917       2.229736       0.000000       0.214132   -9999.000000   -9999.000000       0.074400   -9999.000000
57177     57177     henan          113.5381       33.3411          107       174     2012      01        12        012              0.301583       0.677277       0.000000       0.190147   -9999.000000       0.216900       0.078800       0.233000
57177     57177     henan          113.5381       33.3411          107       174     2012      01        13        013              0.301708       0.739471       0.000000       0.188697   -9999.000000   -9999.000000       0.083200   -9999.000000
57177     57177     henan          113.5381       33.3411          107       174     2012      01        14        014              0.302000       1.155701       0.000000       0.206273   -9999.000000   -9999.000000   -9999.000000   -9999.000000
57177     57177     henan          113.5381       33.3411          107       174     2012      01        15        015              0.302458       1.175079       0.000000       0.213383   -9999.000000       0.010200   -9999.000000       0.111000
57177     57177     henan          113.5381       33.3411          107       174     2012      01        16        016              0.303000       2.416534       1.016420       0.219293   -9999.000000       0.050300       0.042300   -9999.000000
57177     57177     henan          113.5381       33.3411          107       174     2012      01        17        017              0.000000       1.713226       0.952475       0.227063   -9999.000000   -9999.000000       0.086000       0.169000
57177     57177     henan          113.5381       33.3411          107       174     2012      01        18        018              0.314708       2.921875       0.329396       0.240587   -9999.000000       0.126700       0.084500   -9999.000000
57177     57177     henan          113.5381       33.3411          107       174     2012      01        19        019              0.325333       1.878845       0.335507       0.244178   -9999.000000   -9999.000000       0.084000   -9999.000000
57177     57177     henan          113.5381       33.3411          107       174     2012      01        20        020              0.324042       1.914551       1.459667       0.244519   -9999.000000       0.258800   -9999.000000       0.410000
57177     57177     henan          113.5381       33.3411          107       174     2012      01        21        021              0.321458       1.836182       0.123583       0.228772   -9999.000000       0.344900       0.063500   -9999.000000
57177     57177     henan          113.5381       33.3411          107       174     2012      01        22        022              0.318542      -0.551910       7.026442       0.160921   -9999.000000       0.373800       0.048500       0.006000
57177     57177     henan          113.5381       33.3411          107       174     2012      01        23        023              0.315708      -1.111877       0.000000       0.139358   -9999.000000       0.115600       0.093300   -9999.000000
57177     57177     henan          113.5381       33.3411          107       174     2012      01        24        024              0.314875       0.745789       0.000000       0.173533   -9999.000000   -9999.000000   -9999.000000       0.301000
57177     57177     henan          113.5381       33.3411          107       174     2012      01        25        025              0.311875       0.439575       0.000000       0.172651   -9999.000000       0.088600       0.095800       0.062000
57177     57177     henan          113.5381       33.3411          107       174     2012      01        26        026              0.311667       1.642548       0.000000       0.193057   -9999.000000       0.076400   -9999.000000   -9999.000000
57177     57177     henan          113.5381       33.3411          107       174     2012      01        27        027              0.311750       2.994110       0.000000       0.217575   -9999.000000   -9999.000000       0.081200       0.201000
57177     57177     henan          113.5381       33.3411          107       174     2012      01        28        028              0.311542       3.425201       0.000000       0.233680       0.100000       0.057800       0.102700   -9999.000000
57177     57177     henan          113.5381       33.3411          107       174     2012      01        29        029              0.311417       3.632965      52.716976       0.232809   -9999.000000   -9999.000000       0.093900       0.216000
57177     57177     henan          113.5381       33.3411          107       174     2012      01        30        030              0.310917       2.432983       0.000000       0.228834       0.105000       0.161100       0.107500       0.097000
57177     57177     henan          113.5381       33.3411          107       174     2012      01        31        031              0.309583       3.695953       0.000000       0.240920   -9999.000000   -9999.000000   -9999.000000       0.353000
57177     57177     henan          113.5381       33.3411          107       174     2012      02        01        032              0.307500       5.423615       0.000000       0.238506   -9999.000000   -9999.000000   -9999.000000       0.050000
57177     57177     henan          113.5381       33.3411          107       174     2012      02        02        033              0.306167       0.945160       0.000000       0.198121       0.106000       0.175500       0.064200   -9999.000000
57177     57177     henan          113.5381       33.3411          107       174     2012      02        03        034              0.305333       1.409241       0.000000       0.191159       0.106000       0.066100       0.099400       0.067000
57177     57177     henan          113.5381       33.3411          107       174     2012      02        04        035              0.304792       2.955841       0.000000       0.213029   -9999.000000   -9999.000000       0.105800   -9999.000000
57177     57177     henan          113.5381       33.3411          107       174     2012      02        05        036              0.305042       1.470276       0.000000       0.215064   -9999.000000   -9999.000000       0.106500       0.317000
57177     57177     henan          113.5381       33.3411          107       174     2012      02        06        037              0.303833       4.520416       0.000000       0.237942   -9999.000000   -9999.000000   -9999.000000       0.075000
57177     57177     henan          113.5381       33.3411          107       174     2012      02        07        038              0.301625       5.231110       0.000000       0.229735   -9999.000000   -9999.000000       0.109200   -9999.000000
57177     57177     henan          113.5381       33.3411          107       174     2012      02        08        039              0.300083       2.465881       0.000000       0.199911   -9999.000000       0.080000       0.087200       0.004000
57177     57177     henan          113.5381       33.3411          107       174     2012      02        09        040              0.299000       1.702667       0.000000       0.183024   -9999.000000       0.292700       0.102800   -9999.000000
57177     57177     henan          113.5381       33.3411          107       174     2012      02        10        041              0.298333       1.617584       0.000000       0.196153   -9999.000000       0.119100       0.110300       0.039000
57177     57177     henan          113.5381       33.3411          107       174     2012      02        11        042              0.296875       3.226959       0.000000       0.200189   -9999.000000   -9999.000000   -9999.000000   -9999.000000
57177     57177     henan          113.5381       33.3411          107       174     2012      02        12        043              0.295875       4.427765       0.000000       0.222626   -9999.000000       0.074200   -9999.000000   -9999.000000
57177     57177     henan          113.5381       33.3411          107       174     2012      02        13        044              0.295667       2.368744       0.000000       0.208199   -9999.000000       0.034800   -9999.000000       0.069000
57177     57177     henan          113.5381       33.3411          107       174     2012      02        14        045              0.295708       2.511078       0.000000       0.217532       0.100000   -9999.000000       0.103800   -9999.000000
57177     57177     henan          113.5381       33.3411          107       174     2012      02        15        046              0.295333       5.197540       0.190883       0.237109   -9999.000000       0.020800       0.098700       0.187000
57177     57177     henan          113.5381       33.3411          107       174     2012      02        16        047              0.295000       3.836395       0.000000       0.234595   -9999.000000   -9999.000000       0.103400   -9999.000000
57177     57177     henan          113.5381       33.3411          107       174     2012      02        17        048              0.294083       3.945801       0.000000       0.226047       0.086000   -9999.000000   -9999.000000   -9999.000000
57177     57177     henan          113.5381       33.3411          107       174     2012      02        18        049              0.292083       4.200928       0.000000       0.219023       0.076000   -9999.000000   -9999.000000       0.119000
57177     57177     henan          113.5381       33.3411          107       174     2012      02        19        050              0.290042       4.886475       0.000000       0.221870       0.091000   -9999.000000       0.070800   -9999.000000
57177     57177     henan          113.5381       33.3411          107       174     2012      02        20        051              0.288625       6.633453       0.000000       0.231372       0.100000       0.028800       0.104300       0.145000
57177     57177     henan          113.5381       33.3411          107       174     2012      02        21        052              0.287167       7.103729       0.000000       0.234012       0.103000       0.083200   -9999.000000   -9999.000000
57177     57177     henan          113.5381       33.3411          107       174     2012      02        22        053              0.285208       9.667542       0.000000       0.232527       0.104000       0.125400       0.103100       0.089000
57177     57177     henan          113.5381       33.3411          107       174     2012      02        23        054              0.282875       9.683502       0.000000       0.232146       0.108500       0.097900   -9999.000000       0.161000
57177     57177     henan          113.5381       33.3411          107       174     2012      02        24        055              0.281750       4.954651       0.000000       0.232256       0.097000   -9999.000000       0.103800   -9999.000000
57177     57177     henan          113.5381       33.3411          107       174     2012      02        25        056              0.280042       4.080719       0.000000       0.231739       0.102000       0.033700       0.095000       0.059000
57177     57177     henan          113.5381       33.3411          107       174     2012      02        26        057              0.278167       3.755005       0.000000       0.224745   -9999.000000       0.165200       0.096700   -9999.000000
57177     57177     henan          113.5381       33.3411          107       174     2012      02        27        058              0.276208       4.533051       0.000000       0.215568   -9999.000000   -9999.000000   -9999.000000       0.042000
57177     57177     henan          113.5381       33.3411          107       174     2012      02        28        059              0.274167       5.317078       0.000000       0.224402       0.098000       0.116700   -9999.000000       0.171000
57177     57177     henan          113.5381       33.3411          107       174     2012      02        29        060              0.000000   -9999.000000       0.069544   -9999.000000       0.108000   -9999.000000   -9999.000000   -9999.000000
57177     57177     henan          113.5381       33.3411          107       174     2012      03        01        061              0.275417       6.756165       2.052972       0.228979   -9999.000000       0.182600       0.068000       0.407000
57177     57177     henan          113.5381       33.3411          107       174     2012      03        02        062              0.280542       3.979523       0.108494       0.244373   -9999.000000       0.137300       0.098600   -9999.000000
57177     57177     henan          113.5381       33.3411          107       174     2012      03        03        063              0.282583       4.156067       0.150732       0.241960   -9999.000000   -9999.000000       0.092900       0.337000
57177     57177     henan          113.5381       33.3411          107       174     2012      03        04        064              0.284042       2.610901       0.024983       0.237053   -9999.000000       0.074100       0.092100   -9999.000000
57177     57177     henan          113.5381       33.3411          107       174     2012      03        05        065              0.285375       4.223633       0.073553       0.238035       0.131000   -9999.000000   -9999.000000       0.366000
57177     57177     henan          113.5381       33.3411          107       174     2012      03        06        066              0.283958       7.613098       0.000000       0.238270       0.120000   -9999.000000   -9999.000000       0.041000
57177     57177     henan          113.5381       33.3411          107       174     2012      03        07        067              0.000000       8.881378       0.022940       0.234164       0.119000       0.142200       0.084300   -9999.000000
57177     57177     henan          113.5381       33.3411          107       174     2012      03        08        068              0.279417       8.869354       0.000000       0.232678   -9999.000000   -9999.000000       0.126900       0.160000
57177     57177     henan          113.5381       33.3411          107       174     2012      03        09        069              0.277125       7.047150       0.000000       0.232327   -9999.000000       0.056800       0.116900   -9999.000000
57177     57177     henan          113.5381       33.3411          107       174     2012      03        10        070              0.274583       7.718262       0.000000       0.230601       0.110000       0.232200       0.118700       0.137000
57177     57177     henan          113.5381       33.3411          107       174     2012      03        11        071              0.270250      10.962738       0.000000       0.227342       0.117000       0.232200   -9999.000000   -9999.000000
57177     57177     henan          113.5381       33.3411          107       174     2012      03        12        072              0.267417       6.097992       0.000000       0.222549       0.119000       0.054800       0.113900   -9999.000000
57177     57177     henan          113.5381       33.3411          107       174     2012      03        13        073              0.264625       7.975708       0.000000       0.225590   -9999.000000   -9999.000000       0.112000       0.053000
57177     57177     henan          113.5381       33.3411          107       174     2012      03        14        074              0.261625      12.429779       0.000000       0.223208       0.117000       0.026100       0.123800   -9999.000000
57177     57177     henan          113.5381       33.3411          107       174     2012      03        15        075              0.259292      13.358551       1.331108       0.221260       0.162000       0.085400       0.159100       0.387000
57177     57177     henan          113.5381       33.3411          107       174     2012      03        16        076              0.259125       7.499084       0.000000       0.233506       0.132000   -9999.000000   -9999.000000   -9999.000000
57177     57177     henan          113.5381       33.3411          107       174     2012      03        17        077              0.256000      12.189117       0.000000       0.228321       0.118000   -9999.000000   -9999.000000   -9999.000000
57177     57177     henan          113.5381       33.3411          107       174     2012      03        18        078              0.253417      14.327911       0.663037       0.224242   -9999.000000   -9999.000000       0.116600       0.121000
57177     57177     henan          113.5381       33.3411          107       174     2012      03        19        079              0.255250       8.001648       1.653604       0.229335   -9999.000000       0.187300       0.209800   -9999.000000
57177     57177     henan          113.5381       33.3411          107       174     2012      03        20        080              0.258042       4.045074       0.000000       0.241608       0.124000       0.228800       0.184700       0.173000
57177     57177     henan          113.5381       33.3411          107       174     2012      03        21        081              0.306750       6.502502      33.922783       0.234636       0.255000       0.166300       0.219900   -9999.000000
57177     57177     henan          113.5381       33.3411          107       174     2012      03        22        082              0.329583       5.169159       0.805095       0.301215   -9999.000000       0.256400   -9999.000000       0.523000
57177     57177     henan          113.5381       33.3411          107       174     2012      03        23        083              0.327875       5.653625       0.035333       0.296419   -9999.000000   -9999.000000   -9999.000000       0.253000
57177     57177     henan          113.5381       33.3411          107       174     2012      03        24        084              0.000000      10.160065       0.000000       0.276208       0.196000       0.395400   -9999.000000   -9999.000000
57177     57177     henan          113.5381       33.3411          107       174     2012      03        25        085              0.000000      13.729462       0.000000       0.265818       0.160000       0.053500       0.191100       0.173000
57177     57177     henan          113.5381       33.3411          107       174     2012      03        26        086              0.303417      15.524567       0.122990       0.258590       0.149000   -9999.000000       0.198900   -9999.000000
57177     57177     henan          113.5381       33.3411          107       174     2012      03        27        087              0.298083      16.725555       0.201273       0.253717       0.152000       0.212900       0.198500       0.075000
57177     57177     henan          113.5381       33.3411          107       174     2012      03        28        088              0.294125      17.960815       0.083785       0.249541       0.147000       0.113700   -9999.000000       0.100000
57177     57177     henan          113.5381       33.3411          107       174     2012      03        29        089              0.292158      18.937103       0.060043       0.245426       0.160000       0.255300       0.166000       0.141000
57177     57177     henan          113.5381       33.3411          107       174     2012      03        30        090              0.000000      17.625519       0.867454       0.244483       0.165000       0.201600       0.182300       0.115000
57177     57177     henan          113.5381       33.3411          107       174     2012      03        31        091              0.284250      13.449493       0.000000       0.244719       0.149500   -9999.000000       0.195300   -9999.000000
57177     57177     henan          113.5381       33.3411          107       174     2012      04        01        092              0.265958      17.394104       0.000000       0.235254       0.172000       0.010300       0.188200       0.117000
57177     57177     henan          113.5381       33.3411          107       174     2012      04        02        093              0.260958      19.299622       0.220589       0.229111       0.165000       0.076900   -9999.000000   -9999.000000
57177     57177     henan          113.5381       33.3411          107       174     2012      04        03        094              0.258958      12.746094       0.000000       0.230623   -9999.000000   -9999.000000   -9999.000000       0.082000
57177     57177     henan          113.5381       33.3411          107       174     2012      04        04        095              0.255333      16.110352       0.000000       0.225929       0.171000       0.222200       0.163600       0.080000
57177     57177     henan          113.5381       33.3411          107       174     2012      04        05        096              0.252833      17.258392       0.000000       0.222832       0.164500   -9999.000000       0.226000   -9999.000000
57177     57177     henan          113.5381       33.3411          107       174     2012      04        06        097              0.247750      18.001251       0.000000       0.217877       0.148500   -9999.000000       0.207900       0.079000
57177     57177     henan          113.5381       33.3411          107       174     2012      04        07        098              0.242208      19.448639       0.000000       0.212639       0.150000       0.065600       0.211600   -9999.000000
57177     57177     henan          113.5381       33.3411          107       174     2012      04        08        099              0.235792      19.872375       0.000000       0.209125   -9999.000000       0.148300   -9999.000000       0.046000
57177     57177     henan          113.5381       33.3411          107       174     2012      04        09        100              0.230667      21.886688       0.091773       0.202593       0.159000       0.206300       0.267800   -9999.000000
57177     57177     henan          113.5381       33.3411          107       174     2012      04        10        101              0.228708      18.248718       0.000000       0.207096       0.140000   -9999.000000       0.203300   -9999.000000
57177     57177     henan          113.5381       33.3411          107       174     2012      04        11        102              0.226208      19.773743       0.521463       0.206535       0.180000   -9999.000000       0.258900       0.035000
57177     57177     henan          113.5381       33.3411          107       174     2012      04        12        103              0.222250      19.461334       1.695552       0.204937       0.207000   -9999.000000       0.278100   -9999.000000
57177     57177     henan          113.5381       33.3411          107       174     2012      04        13        104              0.221083      12.843231       0.000000       0.220677   -9999.000000   -9999.000000       0.238800       0.041000
57177     57177     henan          113.5381       33.3411          107       174     2012      04        14        105              0.218208      18.833710       0.399818       0.211877       0.198000       0.107000   -9999.000000   -9999.000000
57177     57177     henan          113.5381       33.3411          107       174     2012      04        15        106              0.216083      16.801483       3.565272       0.208069       0.164500   -9999.000000       0.208300   -9999.000000
57177     57177     henan          113.5381       33.3411          107       174     2012      04        16        107              0.213750      18.619476       0.000000       0.204912       0.152500       0.191300       0.219700       0.014000
57177     57177     henan          113.5381       33.3411          107       174     2012      04        17        108              0.212292      18.040741       0.000000       0.204362       0.166000       0.225300       0.204000   -9999.000000
57177     57177     henan          113.5381       33.3411          107       174     2012      04        18        109              0.209250      20.188995       0.000000       0.199687       0.159000   -9999.000000   -9999.000000       0.036000
57177     57177     henan          113.5381       33.3411          107       174     2012      04        19        110              0.205167      20.239685       0.000000       0.196622       0.174000       0.054500   -9999.000000   -9999.000000
57177     57177     henan          113.5381       33.3411          107       174     2012      04        20        111              0.201125      23.576508       1.243572       0.188361       0.187000       0.093800   -9999.000000       0.075000
57177     57177     henan          113.5381       33.3411          107       174     2012      04        21        112              0.197667      18.119995       0.000000       0.198739       0.181000   -9999.000000       0.156700       0.064000
57177     57177     henan          113.5381       33.3411          107       174     2012      04        22        113              0.192667      20.725128       0.822998       0.192600       0.173000   -9999.000000       0.227400   -9999.000000
57177     57177     henan          113.5381       33.3411          107       174     2012      04        23        114              0.244625      23.920898      59.502865       0.184537       0.165000   -9999.000000       0.147800       0.594000
57177     57177     henan          113.5381       33.3411          107       174     2012      04        24        115              0.329583      25.453125       2.744971       0.283037   -9999.000000       0.363900       0.296100   -9999.000000
57177     57177     henan          113.5381       33.3411          107       174     2012      04        25        116              0.000000      18.872162       0.000000       0.305872       0.216000       0.195100   -9999.000000       0.462000
57177     57177     henan          113.5381       33.3411          107       174     2012      04        26        117              0.314000      18.800964       0.000000       0.280936       0.199000       0.357600       0.256600       0.228000
57177     57177     henan          113.5381       33.3411          107       174     2012      04        27        118              0.295917      21.400574       0.000000       0.267270       0.179500       0.155900   -9999.000000       0.191000
57177     57177     henan          113.5381       33.3411          107       174     2012      04        28        119              0.283000      24.139709       0.000000       0.257923       0.165000   -9999.000000       0.242000       0.122000
57177     57177     henan          113.5381       33.3411          107       174     2012      04        29        120              0.273750      23.344818       0.000000       0.250653   -9999.000000       0.286400       0.242100   -9999.000000
57177     57177     henan          113.5381       33.3411          107       174     2012      04        30        121              0.271958      21.645569       2.096289       0.244289       0.218000       0.185400   -9999.000000       0.391000
57177     57177     henan          113.5381       33.3411          107       174     2012      05        01        122              0.278333      19.773560       0.229388       0.254295       0.155000   -9999.000000   -9999.000000   -9999.000000
57177     57177     henan          113.5381       33.3411          107       174     2012      05        02        123              0.274667      20.978912       0.000000       0.253102       0.160500       0.125000       0.173500       0.301000
57177     57177     henan          113.5381       33.3411          107       174     2012      05        03        124              0.267042      23.516449       1.253149       0.243443       0.152000       0.175300       0.224200       0.163000
57177     57177     henan          113.5381       33.3411          107       174     2012      05        04        125              0.258583      24.482178       0.000000       0.237035       0.138000   -9999.000000       0.192600   -9999.000000
57177     57177     henan          113.5381       33.3411          107       174     2012      05        05        126              0.250050      25.482025       0.000000       0.227775       0.163000   -9999.000000       0.204100       0.170000
57177     57177     henan          113.5381       33.3411          107       174     2012      05        06        127              0.241875      26.631317       0.000000       0.218066       0.160000   -9999.000000   -9999.000000   -9999.000000
57177     57177     henan          113.5381       33.3411          107       174     2012      05        07        128              0.240458      28.079559       1.610937       0.209739   -9999.000000       0.094200   -9999.000000       0.445000
57177     57177     henan          113.5381       33.3411          107       174     2012      05        08        129              0.240292      24.830414       0.000000       0.227219       0.156500       0.111100       0.116000   -9999.000000
57177     57177     henan          113.5381       33.3411          107       174     2012      05        09        130              0.237958      25.243073       0.000000       0.220179       0.144000       0.221400       0.159300   -9999.000000
57177     57177     henan          113.5381       33.3411          107       174     2012      05        10        131              0.232750      26.709686       0.000000       0.211475   -9999.000000       0.060600       0.146600       0.163000
57177     57177     henan          113.5381       33.3411          107       174     2012      05        11        132              0.227083      26.905182       7.290393       0.201862   -9999.000000   -9999.000000       0.153000   -9999.000000
57177     57177     henan          113.5381       33.3411          107       174     2012      05        12        133              0.249250      26.913452       4.057166       0.209913       0.173000       0.273800   -9999.000000       0.392000
57177     57177     henan          113.5381       33.3411          107       174     2012      05        13        134              0.246500      19.670288       0.553940       0.260791       0.150000       0.191300       0.172500   -9999.000000
57177     57177     henan          113.5381       33.3411          107       174     2012      05        14        135              0.238500      23.110474       0.000000       0.238327       0.151000       0.099500       0.153900   -9999.000000
57177     57177     henan          113.5381       33.3411          107       174     2012      05        15        136              0.229625      23.997955       0.000000       0.226731   -9999.000000       0.107200       0.172800       0.217000
57177     57177     henan          113.5381       33.3411          107       174     2012      05        16        137              0.220125      25.554871       0.000000       0.215154       0.147000   -9999.000000       0.169200   -9999.000000
57177     57177     henan          113.5381       33.3411          107       174     2012      05        17        138              0.215792      26.626495       0.473167       0.203670       0.121500       0.210100   -9999.000000       0.261000
57177     57177     henan          113.5381       33.3411          107       174     2012      05        18        139              0.209000      27.527100       0.048491       0.190358       0.141500       0.130000   -9999.000000   -9999.000000
57177     57177     henan          113.5381       33.3411          107       174     2012      05        19        140              0.199750      26.516998       0.000000       0.185355       0.121000   -9999.000000       0.132000       0.210000
57177     57177     henan          113.5381       33.3411          107       174     2012      05        20        141              0.189792      27.967560       0.000000       0.176135   -9999.000000       0.118700       0.168100       0.331000
57177     57177     henan          113.5381       33.3411          107       174     2012      05        21        142              0.181333      26.958038       0.000000       0.167746       0.120000   -9999.000000       0.112200   -9999.000000
57177     57177     henan          113.5381       33.3411          107       174     2012      05        22        143              0.175875      25.591492       0.098222       0.165065       0.124000       0.093300       0.122200       0.253000
57177     57177     henan          113.5381       33.3411          107       174     2012      05        23        144              0.172542      22.904449       0.472627       0.167855   -9999.000000       0.182300   -9999.000000   -9999.000000
57177     57177     henan          113.5381       33.3411          107       174     2012      05        24        145              0.169708      24.424438       0.351538       0.171144       0.115000   -9999.000000   -9999.000000       0.170000
57177     57177     henan          113.5381       33.3411          107       174     2012      05        25        146              0.000000      23.594482       0.302377       0.171996       0.120000       0.076800       0.076900       0.418000
57177     57177     henan          113.5381       33.3411          107       174     2012      05        26        147              0.164292      23.363495       0.000000       0.171364       0.130000       0.091300       0.116800       0.583000
57177     57177     henan          113.5381       33.3411          107       174     2012      05        27        148              0.159667      27.799011       0.073614       0.159973       0.126000       0.208300       0.112300       0.162000
57177     57177     henan          113.5381       33.3411          107       174     2012      05        28        149              0.156625      25.695526       0.503308       0.157661       0.108500       0.127600       0.118200   -9999.000000
57177     57177     henan          113.5381       33.3411          107       174     2012      05        29        150              0.168167      28.313446       8.594554       0.149902       0.155000   -9999.000000   -9999.000000       0.552000
57177     57177     henan          113.5381       33.3411          107       174     2012      05        30        151              0.171000      20.582275       0.000000       0.233885       0.138000       0.307100       0.128000   -9999.000000
57177     57177     henan          113.5381       33.3411          107       174     2012      05        31        152              0.168667      25.579956       0.000000       0.209705   -9999.000000       0.215300   -9999.000000   -9999.000000
57177     57177     henan          113.5381       33.3411          107       174     2012      06        01        153              0.166875      25.682434       0.284814       0.196303       0.105000       0.244300       0.120400       0.264000
57177     57177     henan          113.5381       33.3411          107       174     2012      06        02        154              0.165250      24.116180       0.000000       0.189402       0.100000       0.114600       0.127000   -9999.000000
57177     57177     henan          113.5381       33.3411          107       174     2012      06        03        155              0.162792      27.334351       0.000000       0.175523       0.105500   -9999.000000   -9999.000000       0.301000
57177     57177     henan          113.5381       33.3411          107       174     2012      06        04        156              0.160833      26.536804       0.000000       0.168210       0.098000       0.119500   -9999.000000   -9999.000000
57177     57177     henan          113.5381       33.3411          107       174     2012      06        05        157              0.158000      29.080811       2.021918       0.158676   -9999.000000       0.313300       0.059100       0.393000
57177     57177     henan          113.5381       33.3411          107       174     2012      06        06        158              0.156583      27.736328       0.126656       0.174807       0.104000   -9999.000000       0.085300   -9999.000000
57177     57177     henan          113.5381       33.3411          107       174     2012      06        07        159              0.155083      26.796967       0.000000       0.174038       0.094500       0.157700       0.084600   -9999.000000
57177     57177     henan          113.5381       33.3411          107       174     2012      06        08        160              0.153833      29.206573       0.000000       0.160585       0.105000   -9999.000000       0.085800       0.467000
57177     57177     henan          113.5381       33.3411          107       174     2012      06        09        161              0.152846      30.978821       0.000000       0.146653       0.100000       0.149000   -9999.000000   -9999.000000
57177     57177     henan          113.5381       33.3411          107       174     2012      06        10        162              0.147478      33.716095       0.189442       0.137251   -9999.000000       0.045100   -9999.000000       0.382000
57177     57177     henan          113.5381       33.3411          107       174     2012      06        11        163              0.000000      32.660400       0.000000       0.134390       0.105000   -9999.000000       0.063400   -9999.000000
57177     57177     henan          113.5381       33.3411          107       174     2012      06        12        164              0.142000      30.748505       0.000000       0.132483       0.095500       0.137400       0.083600   -9999.000000
57177     57177     henan          113.5381       33.3411          107       174     2012      06        13        165              0.140125      34.026001       0.000000       0.128440       0.090000       0.031600       0.081000       0.539000
57177     57177     henan          113.5381       33.3411          107       174     2012      06        14        166              0.135292      35.288422       0.000000       0.126470       0.095000   -9999.000000       0.086100   -9999.000000
57177     57177     henan          113.5381       33.3411          107       174     2012      06        15        167              0.134542      29.984955       0.050973       0.127663       0.096000       0.095900   -9999.000000       0.455000
57177     57177     henan          113.5381       33.3411          107       174     2012      06        16        168              0.133087      31.412506       0.849809       0.126534       0.109000   -9999.000000       0.076900   -9999.000000
57177     57177     henan          113.5381       33.3411          107       174     2012      06        17        169              0.131250      32.827179       0.217662       0.125367       0.104000   -9999.000000       0.081600       0.327000
57177     57177     henan          113.5381       33.3411          107       174     2012      06        18        170              0.130375      32.197021       0.000000       0.124869       0.105500       0.106000       0.079400       0.431000
57177     57177     henan          113.5381       33.3411          107       174     2012      06        19        171              0.129208      33.296173       0.230546       0.124032       0.102000   -9999.000000       0.080700   -9999.000000
57177     57177     henan          113.5381       33.3411          107       174     2012      06        20        172              0.128083      33.606842       0.000000       0.124410       0.097000   -9999.000000   -9999.000000       0.337000
57177     57177     henan          113.5381       33.3411          107       174     2012      06        21        173              0.126667      33.092468       0.000000       0.123245   -9999.000000   -9999.000000   -9999.000000   -9999.000000
57177     57177     henan          113.5381       33.3411          107       174     2012      06        22        174              0.125750      34.089996       0.755653       0.122524       0.109000   -9999.000000       0.052600       0.299000
57177     57177     henan          113.5381       33.3411          107       174     2012      06        23        175              0.123917      35.378693       1.453046       0.127816   -9999.000000       0.209500       0.084800       0.455000
57177     57177     henan          113.5381       33.3411          107       174     2012      06        24        176              0.123375      34.114685       0.000000       0.128320       0.105000   -9999.000000       0.078200       0.433000
57177     57177     henan          113.5381       33.3411          107       174     2012      06        25        177              0.121458      33.927765       0.737124       0.126266       0.104000       0.147800       0.064400       0.395000
57177     57177     henan          113.5381       33.3411          107       174     2012      06        26        178              0.122167      32.007507       0.000000       0.123806   -9999.000000   -9999.000000   -9999.000000   -9999.000000
57177     57177     henan          113.5381       33.3411          107       174     2012      06        27        179              0.118708      32.041534       4.013204       0.122390       0.168000   -9999.000000       0.097400       0.515000
57177     57177     henan          113.5381       33.3411          107       174     2012      06        28        180              0.126125      26.689423       5.003857       0.139011       0.171500       0.114300       0.072200   -9999.000000
57177     57177     henan          113.5381       33.3411          107       174     2012      06        29        181              0.141750      25.783752      12.549257       0.220749       0.149000   -9999.000000       0.069800       0.836000
57177     57177     henan          113.5381       33.3411          107       174     2012      06        30        182              0.316750      28.027618      25.443029       0.224674   -9999.000000       0.210000       0.088700   -9999.000000
57177     57177     henan          113.5381       33.3411          107       174     2012      07        01        183              0.316458      24.673889       6.366220       0.310105   -9999.000000       0.231300       0.091600   -9999.000000
57177     57177     henan          113.5381       33.3411          107       174     2012      07        02        184              0.325125      25.820282      10.364716       0.286326       0.232000       0.255300   -9999.000000       0.987000
57177     57177     henan          113.5381       33.3411          107       174     2012      07        03        185              0.318000      25.673859       0.251960       0.297441       0.208000       0.368300       0.068100   -9999.000000
57177     57177     henan          113.5381       33.3411          107       174     2012      07        04        186              0.323227      28.399445     101.176636       0.276930       0.200000   -9999.000000       0.084300       1.000000
57177     57177     henan          113.5381       33.3411          107       174     2012      07        05        187              0.333667      27.763458      42.698318       0.345790       0.272000   -9999.000000       0.094700   -9999.000000
57177     57177     henan          113.5381       33.3411          107       174     2012      07        06        188              0.324417      25.135101       2.079236       0.358282   -9999.000000       0.277600       0.096400   -9999.000000
57177     57177     henan          113.5381       33.3411          107       174     2012      07        07        189              0.332333      29.243164      13.351705       0.295297   -9999.000000       0.276900   -9999.000000       1.000000
57177     57177     henan          113.5381       33.3411          107       174     2012      07        08        190              0.330000      30.151398      11.977242       0.309446       0.219000   -9999.000000   -9999.000000   -9999.000000
57177     57177     henan          113.5381       33.3411          107       174     2012      07        09        191              0.337000      30.347443       2.744658       0.307991       0.228000   -9999.000000       0.096200       0.916000
57177     57177     henan          113.5381       33.3411          107       174     2012      07        10        192              0.334478      30.738739       1.941223       0.293972       0.217000       0.489900       0.117300   -9999.000000
57177     57177     henan          113.5381       33.3411          107       174     2012      07        11        193              0.331333      29.333374       0.000000       0.286681       0.215000       0.279400       0.110600   -9999.000000
57177     57177     henan          113.5381       33.3411          107       174     2012      07        12        194              0.328588      33.187225       0.000000       0.267981   -9999.000000       0.086900       0.105600       0.709000
57177     57177     henan          113.5381       33.3411          107       174     2012      07        13        195              0.326792      32.166748       5.259825       0.258308       0.244000       0.197600   -9999.000000   -9999.000000
57177     57177     henan          113.5381       33.3411          107       174     2012      07        14        196              0.326125      28.328644       0.000000       0.269801       0.217000   -9999.000000       0.106500       0.705000
57177     57177     henan          113.5381       33.3411          107       174     2012      07        15        197              0.323583      27.097626       0.000000       0.265312       0.218500       0.431400       0.084400   -9999.000000
57177     57177     henan          113.5381       33.3411          107       174     2012      07        16        198              0.318783      28.628479       1.307141       0.253737       0.176000       0.145100       0.105600       0.796000
57177     57177     henan          113.5381       33.3411          107       174     2012      07        17        199              0.313125      29.290527       0.000000       0.243787       0.182000   -9999.000000       0.101900       0.652000
57177     57177     henan          113.5381       33.3411          107       174     2012      07        18        200              0.307458      29.442535       0.000000       0.238416       0.223000       0.172800       0.089300   -9999.000000
57177     57177     henan          113.5381       33.3411          107       174     2012      07        19        201              0.301458      30.329742       0.000000       0.230793       0.216000       0.101000   -9999.000000       0.558000
57177     57177     henan          113.5381       33.3411          107       174     2012      07        20        202              0.293542      31.331879       0.000000       0.221882       0.194500       0.159600       0.075700   -9999.000000
57177     57177     henan          113.5381       33.3411          107       174     2012      07        21        203              0.283125      32.535858       9.535056       0.214440       0.242500       0.315200       0.077000       0.589000
57177     57177     henan          113.5381       33.3411          107       174     2012      07        22        204              0.293077      33.179657      10.377079       0.225185       0.262000   -9999.000000       0.098100       0.813000
57177     57177     henan          113.5381       33.3411          107       174     2012      07        23        205              0.286917      29.785309       0.000000       0.289786   -9999.000000       0.197400       0.150900       0.774000
57177     57177     henan          113.5381       33.3411          107       174     2012      07        24        206              0.281417      30.875549       1.239847       0.253126       0.323000       0.121200   -9999.000000       0.728000
57177     57177     henan          113.5381       33.3411          107       174     2012      07        25        207              0.276375      31.141357      13.913647       0.248144       0.260500       0.382700   -9999.000000   -9999.000000
57177     57177     henan          113.5381       33.3411          107       174     2012      07        26        208              0.270267      32.071625       2.257797       0.284554       0.235500       0.316400       0.115200       0.615000
57177     57177     henan          113.5381       33.3411          107       174     2012      07        27        209              0.256833      32.871948      14.675874       0.261306       0.198000   -9999.000000       0.150000   -9999.000000
57177     57177     henan          113.5381       33.3411          107       174     2012      07        28        210              0.243375      32.932373       0.000000       0.245308   -9999.000000       0.260300       0.126800       0.713000
57177     57177     henan          113.5381       33.3411          107       174     2012      07        29        211              0.228750      33.625610       0.000000       0.232452       0.236000       0.181400       0.131500       0.484000
57177     57177     henan          113.5381       33.3411          107       174     2012      07        30        212              0.218250      33.835297       2.025235       0.221585       0.204000       0.102200   -9999.000000   -9999.000000
57177     57177     henan          113.5381       33.3411          107       174     2012      07        31        213              0.214625      33.830200      21.691601       0.220624       0.198000       0.189800       0.164200       0.774000
57177     57177     henan          113.5381       33.3411          107       174     2012      08        01        214              0.214125      31.939484       0.127068       0.272156       0.301000   -9999.000000       0.132300   -9999.000000
57177     57177     henan          113.5381       33.3411          107       174     2012      08        02        215              0.213250      27.893250       0.000000       0.276733       0.251000       0.214600       0.145200       0.620000
57177     57177     henan          113.5381       33.3411          107       174     2012      08        03        216              0.210542      29.269806       0.000000       0.259317   -9999.000000       0.163000       0.141200   -9999.000000
57177     57177     henan          113.5381       33.3411          107       174     2012      08        04        217              0.213125      30.281982      20.916515       0.247032       0.377000   -9999.000000   -9999.000000   -9999.000000
57177     57177     henan          113.5381       33.3411          107       174     2012      08        05        218              0.219208      27.441101       2.263355       0.286084       0.332000       0.185000   -9999.000000       0.772000
57177     57177     henan          113.5381       33.3411          107       174     2012      08        06        219              0.218625      29.072388       0.000000       0.286342       0.307000       0.120100       0.117600   -9999.000000
57177     57177     henan          113.5381       33.3411          107       174     2012      08        07        220              0.214875      29.543884       0.000000       0.268375       0.252000       0.379400   -9999.000000       0.652000
57177     57177     henan          113.5381       33.3411          107       174     2012      08        08        221              0.215042      30.077820       0.000000       0.256549   -9999.000000       0.468800       0.127700   -9999.000000
57177     57177     henan          113.5381       33.3411          107       174     2012      08        09        222              0.215125      30.452240       5.360861       0.247519       0.326000   -9999.000000       0.127900   -9999.000000
57177     57177     henan          113.5381       33.3411          107       174     2012      08        10        223              0.213304      30.062225       0.650855       0.238485       0.256000       0.148600   -9999.000000       0.647000
57177     57177     henan          113.5381       33.3411          107       174     2012      08        11        224              0.212625      29.081116       1.397982       0.233341       0.278500       0.150200   -9999.000000   -9999.000000
57177     57177     henan          113.5381       33.3411          107       174     2012      08        12        225              0.213500      29.964691       1.643865       0.229720       0.229000       0.160000       0.104200       0.546000
57177     57177     henan          113.5381       33.3411          107       174     2012      08        13        226              0.207833      30.937042       0.167834       0.219981       0.297000       0.179300       0.119800   -9999.000000
57177     57177     henan          113.5381       33.3411          107       174     2012      08        14        227              0.205875      25.707550       2.282635       0.221648   -9999.000000   -9999.000000       0.108900       0.652000
57177     57177     henan          113.5381       33.3411          107       174     2012      08        15        228              0.206957      27.368683       0.000000       0.226270       0.305000       0.143500       0.109400       0.608000
57177     57177     henan          113.5381       33.3411          107       174     2012      08        16        229              0.205542      29.070068       0.000000       0.222546       0.267500       0.100300   -9999.000000   -9999.000000
57177     57177     henan          113.5381       33.3411          107       174     2012      08        17        230              0.204208      28.615356       0.000000       0.212681       0.276000   -9999.000000       0.103200       0.449000
57177     57177     henan          113.5381       33.3411          107       174     2012      08        18        231              0.202083      30.624268       0.552741       0.205129       0.232000       0.048200       0.102300   -9999.000000
57177     57177     henan          113.5381       33.3411          107       174     2012      08        19        232              0.207417      31.293457      21.239826       0.200396   -9999.000000   -9999.000000       0.123900       0.452000
57177     57177     henan          113.5381       33.3411          107       174     2012      08        20        233              0.287917      30.598694      31.371813       0.251997   -9999.000000       0.156500       0.180000       0.755000
57177     57177     henan          113.5381       33.3411          107       174     2012      08        21        234              0.309625      26.265472       6.170523       0.328778       0.245000       0.200800   -9999.000000       0.835000
57177     57177     henan          113.5381       33.3411          107       174     2012      08        22        235              0.289458      26.138367       0.000000       0.306264       0.255000   -9999.000000   -9999.000000   -9999.000000
57177     57177     henan          113.5381       33.3411          107       174     2012      08        23        236              0.276542      23.907745       0.000000       0.280128       0.198000       0.319100       0.115800   -9999.000000
57177     57177     henan          113.5381       33.3411          107       174     2012      08        24        237              0.268125      24.709747       0.000000       0.268069   -9999.000000       0.163500       0.169500       0.669000
57177     57177     henan          113.5381       33.3411          107       174     2012      08        25        238              0.000000      25.469666       0.273601       0.259269       0.265000       0.232500       0.148900   -9999.000000
57177     57177     henan          113.5381       33.3411          107       174     2012      08        26        239              0.256917      26.878845       3.216813       0.252852   -9999.000000       0.325700       0.157000       0.646000
57177     57177     henan          113.5381       33.3411          107       174     2012      08        27        240              0.256875      26.166595       2.424492       0.260792       0.258500   -9999.000000   -9999.000000       0.549000
57177     57177     henan          113.5381       33.3411          107       174     2012      08        28        241              0.256292      26.184814       0.000000       0.264320       0.259000       0.161400       0.164500   -9999.000000
57177     57177     henan          113.5381       33.3411          107       174     2012      08        29        242              0.252750      28.428314       0.000000       0.251761       0.219000       0.142300       0.126800       0.625000
57177     57177     henan          113.5381       33.3411          107       174     2012      08        30        243              0.247500      30.031647       0.000000       0.241050   -9999.000000       0.186200       0.157800   -9999.000000
57177     57177     henan          113.5381       33.3411          107       174     2012      08        31        244              0.242917      30.028381      11.074250       0.234649       0.267000       0.188100       0.161400       0.829000
57177     57177     henan          113.5381       33.3411          107       174     2012      09        01        245              0.266417      28.058380      60.547913       0.269664       0.257000   -9999.000000       0.153100   -9999.000000
57177     57177     henan          113.5381       33.3411          107       174     2012      09        02        246              0.299167      27.491913       0.996065       0.328323       0.257500       0.292200   -9999.000000   -9999.000000
57177     57177     henan          113.5381       33.3411          107       174     2012      09        03        247              0.289042      24.595154       0.000000       0.308163       0.219000       0.184200       0.145300       0.730000
57177     57177     henan          113.5381       33.3411          107       174     2012      09        04        248              0.280542      25.848450       0.000000       0.284454   -9999.000000       0.232200       0.155200   -9999.000000
57177     57177     henan          113.5381       33.3411          107       174     2012      09        05        249              0.273083      25.779694       0.000000       0.272287       0.258000       0.233600       0.158000       0.600000
57177     57177     henan          113.5381       33.3411          107       174     2012      09        06        250              0.266042      26.873962       2.928937       0.262860       0.225500   -9999.000000       0.152600   -9999.000000
57177     57177     henan          113.5381       33.3411          107       174     2012      09        07        251              0.266917      25.717255      27.154078       0.259569       0.223000       0.148800   -9999.000000   -9999.000000
57177     57177     henan          113.5381       33.3411          107       174     2012      09        08        252              0.316625      27.331757      11.531711       0.281182       0.307000       0.179500   -9999.000000       0.953000
57177     57177     henan          113.5381       33.3411          107       174     2012      09        09        253              0.307292      23.627136       0.000000       0.312919       0.279000   -9999.000000       0.110000   -9999.000000
57177     57177     henan          113.5381       33.3411          107       174     2012      09        10        254              0.302333      24.649750       0.497505       0.286013       0.281000       0.340600       0.196900       0.671000
57177     57177     henan          113.5381       33.3411          107       174     2012      09        11        255              0.323083      24.934479      38.612610       0.278070       0.193000   -9999.000000       0.185100   -9999.000000
57177     57177     henan          113.5381       33.3411          107       174     2012      09        12        256              0.314917      22.736694       0.579786       0.331317       0.185500       0.472200       0.184800       0.805000
57177     57177     henan          113.5381       33.3411          107       174     2012      09        13        257              0.308000      21.271667       0.000000       0.295203       0.181500       0.397000   -9999.000000       0.748000
57177     57177     henan          113.5381       33.3411          107       174     2012      09        14        258              0.302458      21.446198       0.000000       0.280673       0.157000   -9999.000000       0.189100   -9999.000000
57177     57177     henan          113.5381       33.3411          107       174     2012      09        15        259              0.298083      22.121613       0.000000       0.272720   -9999.000000       0.243700       0.151800       0.621000
57177     57177     henan          113.5381       33.3411          107       174     2012      09        16        260              0.294167      22.315399       0.178678       0.267507       0.191000       0.234100       0.178600   -9999.000000
57177     57177     henan          113.5381       33.3411          107       174     2012      09        17        261              0.291208      22.420807       0.000000       0.264271       0.158500   -9999.000000       0.154800       0.602000
57177     57177     henan          113.5381       33.3411          107       174     2012      09        18        262              0.288500      23.055206       0.000000       0.260445       0.176000       0.186800       0.154700       0.605000
57177     57177     henan          113.5381       33.3411          107       174     2012      09        19        263              0.287333      23.888123       0.778183       0.258053       0.159000   -9999.000000   -9999.000000       0.735000
57177     57177     henan          113.5381       33.3411          107       174     2012      09        20        264              0.285167      24.523590       3.090300       0.256021   -9999.000000       0.231600       0.138800       0.609000
57177     57177     henan          113.5381       33.3411          107       174     2012      09        21        265              0.283833      24.378326       0.500202       0.259046   -9999.000000       0.252200       0.168000   -9999.000000
57177     57177     henan          113.5381       33.3411          107       174     2012      09        22        266              0.282083      24.388245       0.045490       0.267747       0.157000       0.319900       0.160700       0.561000
57177     57177     henan          113.5381       33.3411          107       174     2012      09        23        267              0.279958      24.826080       0.000000       0.260524       0.151000       0.157500       0.168800   -9999.000000
57177     57177     henan          113.5381       33.3411          107       174     2012      09        24        268              0.277583      24.462555       0.515511       0.257064       0.163000   -9999.000000   -9999.000000       0.816000
57177     57177     henan          113.5381       33.3411          107       174     2012      09        25        269              0.275083      24.329926       0.226944       0.254885       0.171000       0.280800   -9999.000000       0.524000
57177     57177     henan          113.5381       33.3411          107       174     2012      09        26        270              0.273083      24.433197       0.057412       0.254559   -9999.000000       0.187500       0.091500   -9999.000000
57177     57177     henan          113.5381       33.3411          107       174     2012      09        27        271              0.272857      23.825195       0.120947       0.254335       0.165000   -9999.000000       0.125300       0.497000
57177     57177     henan          113.5381       33.3411          107       174     2012      09        28        272              0.265133      23.696228       0.000000       0.249750       0.163000   -9999.000000       0.138400   -9999.000000
57177     57177     henan          113.5381       33.3411          107       174     2012      09        29        273              0.262333      20.143890       0.000000       0.243451       0.152000   -9999.000000       0.142500       0.488000
57177     57177     henan          113.5381       33.3411          107       174     2012      09        30        274              0.259125      20.371338       0.000000       0.241217       0.159000       0.182500   -9999.000000   -9999.000000
57177     57177     henan          113.5381       33.3411          107       174     2012      10        01        275              0.255500      20.650818       0.000000       0.239520   -9999.000000   -9999.000000       0.093600   -9999.000000
57177     57177     henan          113.5381       33.3411          107       174     2012      10        02        276              0.252542      20.999176       0.646760       0.236669       0.130000   -9999.000000       0.079200       0.366000
57177     57177     henan          113.5381       33.3411          107       174     2012      10        03        277              0.249417      22.159119       0.000000       0.235555       0.120000       0.201300       0.094100   -9999.000000
57177     57177     henan          113.5381       33.3411          107       174     2012      10        04        278              0.246000      22.547424       0.000000       0.233529       0.125000       0.217000       0.096300       0.388000
57177     57177     henan          113.5381       33.3411          107       174     2012      10        05        279              0.243583      21.706573       0.000000       0.235036       0.133000       0.208000   -9999.000000   -9999.000000
57177     57177     henan          113.5381       33.3411          107       174     2012      10        06        280              0.241875      19.955353       0.000000       0.236532       0.135000       0.233000   -9999.000000   -9999.000000
57177     57177     henan          113.5381       33.3411          107       174     2012      10        07        281              0.239958      20.860870       3.106252       0.234957       0.139000   -9999.000000       0.068600       0.549000
57177     57177     henan          113.5381       33.3411          107       174     2012      10        08        282              0.237917      20.959869       0.000000       0.237943       0.128000       0.157200       0.081300   -9999.000000
57177     57177     henan          113.5381       33.3411          107       174     2012      10        09        283              0.235583      21.590820       0.089617       0.236467       0.128500       0.145500       0.071900       0.436000
57177     57177     henan          113.5381       33.3411          107       174     2012      10        10        284              0.232042      21.091278       0.000000       0.231476       0.125000       0.051300       0.077600   -9999.000000
57177     57177     henan          113.5381       33.3411          107       174     2012      10        11        285              0.229458      19.719574       0.000000       0.228032       0.100000       0.031400   -9999.000000       0.441000
57177     57177     henan          113.5381       33.3411          107       174     2012      10        12        286              0.235667      20.193207       0.000000       0.228001   -9999.000000   -9999.000000   -9999.000000       0.404000
57177     57177     henan          113.5381       33.3411          107       174     2012      10        13        287              0.245583      19.511658       0.000000       0.230546       0.109000       0.235400       0.053800   -9999.000000
57177     57177     henan          113.5381       33.3411          107       174     2012      10        14        288              0.251125      20.500610       0.000000       0.228758       0.094500       0.120400       0.079800       0.425000
57177     57177     henan          113.5381       33.3411          107       174     2012      10        15        289              0.253375      20.365387       3.885022       0.228114       0.132500   -9999.000000       0.074700   -9999.000000
57177     57177     henan          113.5381       33.3411          107       174     2012      10        16        290              0.259083      20.057312       0.062949       0.238987       0.138000       0.129300       0.084800       0.405000
57177     57177     henan          113.5381       33.3411          107       174     2012      10        17        291              0.260125      16.233521       0.000000       0.249589       0.101000   -9999.000000   -9999.000000       0.358000
57177     57177     henan          113.5381       33.3411          107       174     2012      10        18        292              0.258792      16.570709       0.000000       0.239431       0.118000       0.116100       0.071900       0.526000
57177     57177     henan          113.5381       33.3411          107       174     2012      10        19        293              0.258250      18.187592       0.000000       0.238386       0.116000       0.192900       0.072300       0.337000
57177     57177     henan          113.5381       33.3411          107       174     2012      10        20        294              0.258208      18.754761       0.000000       0.236942       0.103500   -9999.000000       0.080200   -9999.000000
57177     57177     henan          113.5381       33.3411          107       174     2012      10        21        295              0.257250      20.532867       0.165053       0.234965       0.131000       0.112400       0.079100       0.381000
57177     57177     henan          113.5381       33.3411          107       174     2012      10        22        296              0.254708      19.016205       0.000000       0.234874   -9999.000000       0.054300   -9999.000000   -9999.000000
57177     57177     henan          113.5381       33.3411          107       174     2012      10        23        297              0.253583      16.000549       0.284439       0.230845   -9999.000000       0.181600   -9999.000000       0.550000
57177     57177     henan          113.5381       33.3411          107       174     2012      10        24        298              0.253208      16.854950       0.000000       0.231584   -9999.000000   -9999.000000       0.055300       0.277000
57177     57177     henan          113.5381       33.3411          107       174     2012      10        25        299              0.000000      17.808441       1.285100       0.231533       0.132000   -9999.000000       0.086800   -9999.000000
57177     57177     henan          113.5381       33.3411          107       174     2012      10        26        300              0.249917      19.038025       1.657736       0.234929       0.160500       0.183300       0.089000       0.529000
57177     57177     henan          113.5381       33.3411          107       174     2012      10        27        301              0.249750      15.434052       0.000000       0.248082       0.124000       0.241400       0.078200   -9999.000000
57177     57177     henan          113.5381       33.3411          107       174     2012      10        28        302              0.000000      17.981323       1.789700       0.242214   -9999.000000       0.092300   -9999.000000       0.345000
57177     57177     henan          113.5381       33.3411          107       174     2012      10        29        303              0.247583      18.904419       1.024469       0.239283       0.157000       0.127300   -9999.000000   -9999.000000
57177     57177     henan          113.5381       33.3411          107       174     2012      10        30        304              0.246208      15.607697       0.000000       0.246245       0.120000   -9999.000000       0.058800   -9999.000000
57177     57177     henan          113.5381       33.3411          107       174     2012      10        31        305              0.244542      14.335815       0.000000       0.240699       0.112000       0.230200       0.079500       0.344000
57177     57177     henan          113.5381       33.3411          107       174     2012      11        01        306              0.243167      13.729462       0.000000       0.237345       0.120000   -9999.000000       0.079400   -9999.000000
57177     57177     henan          113.5381       33.3411          107       174     2012      11        02        307              0.242208      14.718170       2.781510       0.237764       0.122000   -9999.000000       0.077100       0.333000
57177     57177     henan          113.5381       33.3411          107       174     2012      11        03        308              0.242625      16.114655      10.341098       0.241639   -9999.000000       0.176900   -9999.000000   -9999.000000
57177     57177     henan          113.5381       33.3411          107       174     2012      11        04        309              0.246625      10.550262       0.196120       0.284549   -9999.000000   -9999.000000       0.069700   -9999.000000
57177     57177     henan          113.5381       33.3411          107       174     2012      11        05        310              0.247208      10.156921       0.000000       0.262818       0.140000       0.152600       0.087000       0.444000
57177     57177     henan          113.5381       33.3411          107       174     2012      11        06        311              0.247000       9.657623       0.000000       0.256811       0.137000   -9999.000000       0.082500   -9999.000000
57177     57177     henan          113.5381       33.3411          107       174     2012      11        07        312              0.246667      11.213715       0.224860       0.254119       0.134000   -9999.000000       0.090800       0.287000
57177     57177     henan          113.5381       33.3411          107       174     2012      11        08        313              0.246125      11.876312       0.000000       0.254172   -9999.000000       0.185800   -9999.000000   -9999.000000
57177     57177     henan          113.5381       33.3411          107       174     2012      11        09        314              0.245792      11.546112       4.201355       0.253779       0.208000       0.156700   -9999.000000       0.328000
57177     57177     henan          113.5381       33.3411          107       174     2012      11        10        315              0.248083      11.347198       0.571185       0.266758       0.137000       0.112400       0.058100       0.547000
57177     57177     henan          113.5381       33.3411          107       174     2012      11        11        316              0.249542       9.540436       0.000000       0.266181       0.123000   -9999.000000       0.091100   -9999.000000
57177     57177     henan          113.5381       33.3411          107       174     2012      11        12        317              0.249208       9.211792       0.000000       0.258022       0.117000   -9999.000000       0.075100       0.274000
57177     57177     henan          113.5381       33.3411          107       174     2012      11        13        318              0.000000      10.951691       0.000000       0.255755       0.119000       0.095500       0.082100   -9999.000000
57177     57177     henan          113.5381       33.3411          107       174     2012      11        14        319              0.247333      10.828827       0.000000       0.252605       0.125000       0.104200   -9999.000000       0.193000
57177     57177     henan          113.5381       33.3411          107       174     2012      11        15        320              0.246375       9.123993       0.696554       0.250641       0.149000       0.065900       0.089500       0.345000
57177     57177     henan          113.5381       33.3411          107       174     2012      11        16        321              0.244750       8.671722       0.000000       0.252666       0.102000   -9999.000000       0.062900       0.500000
57177     57177     henan          113.5381       33.3411          107       174     2012      11        17        322              0.000000       9.142487       0.000000       0.251412       0.122000   -9999.000000       0.080900       0.194000
57177     57177     henan          113.5381       33.3411          107       174     2012      11        18        323              0.242250      10.568817       0.000000       0.250367       0.120000       0.052700       0.081700   -9999.000000
57177     57177     henan          113.5381       33.3411          107       174     2012      11        19        324              0.241000      11.376587       0.000000       0.249543   -9999.000000       0.093400   -9999.000000       0.258000
57177     57177     henan          113.5381       33.3411          107       174     2012      11        20        325              0.239583      10.834137       0.186059       0.248410       0.152000   -9999.000000   -9999.000000   -9999.000000
57177     57177     henan          113.5381       33.3411          107       174     2012      11        21        326              0.238333       8.876160       0.000000       0.249727       0.120500       0.049000       0.048800       0.220000
57177     57177     henan          113.5381       33.3411          107       174     2012      11        22        327              0.236750       9.874176       0.000000       0.248849       0.125000   -9999.000000       0.070500       0.107000
57177     57177     henan          113.5381       33.3411          107       174     2012      11        23        328              0.234958       8.319275       0.000000       0.249587       0.119000   -9999.000000       0.064200   -9999.000000
57177     57177     henan          113.5381       33.3411          107       174     2012      11        24        329              0.233500       6.531464       1.313445       0.247866   -9999.000000   -9999.000000       0.072300       0.167000
57177     57177     henan          113.5381       33.3411          107       174     2012      11        25        330              0.232958       8.296234       3.256454       0.250336   -9999.000000   -9999.000000   -9999.000000   -9999.000000
57177     57177     henan          113.5381       33.3411          107       174     2012      11        26        331              0.232417       6.943970       0.000000       0.268331       0.102000       0.040400   -9999.000000       0.244000
57177     57177     henan          113.5381       33.3411          107       174     2012      11        27        332              0.232167       7.622162       0.000000       0.256901       0.103000       0.030900       0.057500   -9999.000000
57177     57177     henan          113.5381       33.3411          107       174     2012      11        28        333              0.231083       8.993256       0.000000       0.253850       0.113000       0.186100       0.093100   -9999.000000
57177     57177     henan          113.5381       33.3411          107       174     2012      11        29        334              0.230417       6.828247       0.018360       0.251686       0.120000       0.171500       0.087800       0.167000
57177     57177     henan          113.5381       33.3411          107       174     2012      11        30        335              0.230000       5.444489       0.000000       0.251628   -9999.000000   -9999.000000       0.098800   -9999.000000
57177     57177     henan          113.5381       33.3411          107       174     2012      12        01        336              0.228500       6.374695       0.308504       0.249970   -9999.000000       0.156500   -9999.000000       0.261000
57177     57177     henan          113.5381       33.3411          107       174     2012      12        02        337              0.228375       2.515198       0.081545       0.250738       0.144000       0.146700       0.087300   -9999.000000
57177     57177     henan          113.5381       33.3411          107       174     2012      12        03        338              0.227417       4.356964       0.048293       0.252443       0.125000       0.278200       0.097000   -9999.000000
57177     57177     henan          113.5381       33.3411          107       174     2012      12        04        339              0.226375       5.410278       0.000000       0.244251       0.127000       0.237500       0.108400       0.181000
57177     57177     henan          113.5381       33.3411          107       174     2012      12        05        340              0.226292       5.064331       0.000000       0.248373   -9999.000000   -9999.000000       0.107300   -9999.000000
57177     57177     henan          113.5381       33.3411          107       174     2012      12        06        341              0.225917       5.208649       0.380141       0.241953       0.131000       0.090700   -9999.000000       0.221000
57177     57177     henan          113.5381       33.3411          107       174     2012      12        07        342              0.225875       6.046906       0.000000       0.248153       0.101000       0.155500   -9999.000000   -9999.000000
57177     57177     henan          113.5381       33.3411          107       174     2012      12        08        343              0.224917       5.852356       0.000000       0.247035       0.125000   -9999.000000       0.057400       0.204000
57177     57177     henan          113.5381       33.3411          107       174     2012      12        09        344              0.224167       4.525543       0.000000       0.241209       0.123000       0.027600       0.108900       0.127000
57177     57177     henan          113.5381       33.3411          107       174     2012      12        10        345              0.222917       3.430267       0.000000       0.236326       0.137000   -9999.000000       0.069100   -9999.000000
57177     57177     henan          113.5381       33.3411          107       174     2012      12        11        346              0.221500       2.753510       0.248104       0.215759   -9999.000000   -9999.000000       0.079100       0.084000
57177     57177     henan          113.5381       33.3411          107       174     2012      12        12        347              0.221750       1.588867       0.138407       0.200344       0.118000       0.021700   -9999.000000   -9999.000000
57177     57177     henan          113.5381       33.3411          107       174     2012      12        13        348              0.222833       1.519470       3.355144       0.222595   -9999.000000   -9999.000000   -9999.000000       0.360000
57177     57177     henan          113.5381       33.3411          107       174     2012      12        14        349              0.233292       1.265625       1.126560       0.241446   -9999.000000       0.197500       0.055000       0.404000
57177     57177     henan          113.5381       33.3411          107       174     2012      12        15        350              0.000000       2.787018       0.151195       0.248532   -9999.000000       0.084700       0.099500       0.523000
57177     57177     henan          113.5381       33.3411          107       174     2012      12        16        351              0.245042       2.065399       0.000000       0.251307   -9999.000000   -9999.000000       0.090000       0.494000
57177     57177     henan          113.5381       33.3411          107       174     2012      12        17        352              0.246000       3.259766       0.841003       0.256265   -9999.000000       0.173700       0.095600   -9999.000000
57177     57177     henan          113.5381       33.3411          107       174     2012      12        18        353              0.245667       2.343567       0.000000       0.250553   -9999.000000   -9999.000000   -9999.000000       0.187000
57177     57177     henan          113.5381       33.3411          107       174     2012      12        19        354              0.245083       2.623596       0.000000       0.234426       0.121000       0.038500       0.110500   -9999.000000
57177     57177     henan          113.5381       33.3411          107       174     2012      12        20        355              0.000000       2.973114       0.402996       0.242431   -9999.000000       0.140400       0.103600       0.249000
57177     57177     henan          113.5381       33.3411          107       174     2012      12        21        356              0.248417       1.223450       0.111581       0.220398   -9999.000000   -9999.000000       0.115500       0.170000
57177     57177     henan          113.5381       33.3411          107       174     2012      12        22        357              0.249583       1.959747       0.000000       0.220908   -9999.000000       0.067100       0.133900   -9999.000000
57177     57177     henan          113.5381       33.3411          107       174     2012      12        23        358              0.248375       2.138275       0.000000       0.222803   -9999.000000   -9999.000000   -9999.000000       0.088000
57177     57177     henan          113.5381       33.3411          107       174     2012      12        24        359              0.246714       0.693787       0.000000       0.185348       0.104000       0.195900   -9999.000000   -9999.000000
57177     57177     henan          113.5381       33.3411          107       174     2012      12        25        360              0.245667       0.826172       0.000000       0.185422   -9999.000000       0.116800       0.071400       0.003000
57177     57177     henan          113.5381       33.3411          107       174     2012      12        26        361              0.000000       0.009247       0.000000       0.167822   -9999.000000       0.071500       0.134800   -9999.000000
57177     57177     henan          113.5381       33.3411          107       174     2012      12        27        362              0.247091      -0.555969       0.678823       0.134499   -9999.000000       0.026500       0.142900   -9999.000000
57177     57177     henan          113.5381       33.3411          107       174     2012      12        28        363              0.252000       0.249329       0.231707       0.158897   -9999.000000   -9999.000000       0.161000       0.207000
57177     57177     henan          113.5381       33.3411          107       174     2012      12        29        364              0.000000       0.628571       0.103562       0.185036   -9999.000000       0.231200   -9999.000000   -9999.000000
57177     57177     henan          113.5381       33.3411          107       174     2012      12        30        365              0.000000       0.054901       0.000000       0.173998       0.104000       0.137900       0.134500       0.054000
57177     57177     henan          113.5381       33.3411          107       174     2012      12        31        366              0.249800       0.869324       0.000000       0.177317       0.105000   -9999.000000       0.092600   -9999.000000
