# Supplementary material for: Research on Fusing Multisatellite Soil Moisture Data Based on Bayesian Model Averaging
Source: Hindawi journal article supplement (doi:10.1155/2018/9310838), 2018-06-25
Supplement: f1 [file 9310838.f1.zip › 2012_sm00-10cm_daily_ZDB_ZHY_57196_366days_allin.txt]

57196     57196     henan          114.8617       33.4611          106       179     2012      01        01        001              0.000000   -9999.000000       0.000000   -9999.000000   -9999.000000   -9999.000000       0.087900   -9999.000000
57196     57196     henan          114.8617       33.4611          106       179     2012      01        02        002              0.276625       1.002747       0.000000       0.259688       0.094000       0.103300       0.127700   -9999.000000
57196     57196     henan          114.8617       33.4611          106       179     2012      01        03        003              0.000000       1.947571       0.000000       0.276028       0.088000   -9999.000000   -9999.000000       0.201000
57196     57196     henan          114.8617       33.4611          106       179     2012      01        04        004              0.272875       1.332520       0.000000       0.255444   -9999.000000   -9999.000000   -9999.000000   -9999.000000
57196     57196     henan          114.8617       33.4611          106       179     2012      01        05        005              0.272125       0.417236       0.000000       0.237835   -9999.000000       0.107400       0.073100       0.316000
57196     57196     henan          114.8617       33.4611          106       179     2012      01        06        006              0.272250       0.877228       0.000000       0.241837   -9999.000000   -9999.000000       0.111600       0.234000
57196     57196     henan          114.8617       33.4611          106       179     2012      01        07        007              0.272000       1.473938       0.000000       0.252167       0.098000   -9999.000000       0.119700       0.353000
57196     57196     henan          114.8617       33.4611          106       179     2012      01        08        008              0.000000       1.978333       0.521474       0.265888       0.091000   -9999.000000       0.125500       0.257000
57196     57196     henan          114.8617       33.4611          106       179     2012      01        09        009              0.272083       2.719421       0.000000       0.267311       0.088000   -9999.000000   -9999.000000   -9999.000000
57196     57196     henan          114.8617       33.4611          106       179     2012      01        10        010              0.272000       3.072449       0.000000       0.278073   -9999.000000   -9999.000000       0.082900       0.316000
57196     57196     henan          114.8617       33.4611          106       179     2012      01        11        011              0.271833       1.605103       0.772786       0.268706   -9999.000000   -9999.000000       0.065900       0.325000
57196     57196     henan          114.8617       33.4611          106       179     2012      01        12        012              0.271125       1.306488       0.478685       0.253472   -9999.000000   -9999.000000       0.076800       0.454000
57196     57196     henan          114.8617       33.4611          106       179     2012      01        13        013              0.270750       1.441315       0.000000       0.257464   -9999.000000   -9999.000000       0.085400       0.317000
57196     57196     henan          114.8617       33.4611          106       179     2012      01        14        014              0.270875       2.144928       0.000000       0.274892       0.111000   -9999.000000       0.084900   -9999.000000
57196     57196     henan          114.8617       33.4611          106       179     2012      01        15        015              0.271000       2.365143       0.000000       0.285139   -9999.000000   -9999.000000   -9999.000000       0.334000
57196     57196     henan          114.8617       33.4611          106       179     2012      01        16        016              0.271000       3.798187       0.211505       0.292041   -9999.000000   -9999.000000       0.045600   -9999.000000
57196     57196     henan          114.8617       33.4611          106       179     2012      01        17        017              0.000000       3.106110       2.736322       0.295763       0.120000   -9999.000000       0.076100       0.674000
57196     57196     henan          114.8617       33.4611          106       179     2012      01        18        018              0.275750       3.565948       2.853715       0.305136   -9999.000000   -9999.000000       0.070100       0.728000
57196     57196     henan          114.8617       33.4611          106       179     2012      01        19        019              0.286333       2.759369       0.164609       0.322775   -9999.000000   -9999.000000       0.071800   -9999.000000
57196     57196     henan          114.8617       33.4611          106       179     2012      01        20        020              0.285625       3.458588       0.321392       0.317663   -9999.000000   -9999.000000   -9999.000000       0.568000
57196     57196     henan          114.8617       33.4611          106       179     2012      01        21        021              0.282792       2.317657       0.701240       0.296877   -9999.000000   -9999.000000   -9999.000000   -9999.000000
57196     57196     henan          114.8617       33.4611          106       179     2012      01        22        022              0.282000      -0.434998       0.000000       0.240270   -9999.000000   -9999.000000       0.022900       0.222000
57196     57196     henan          114.8617       33.4611          106       179     2012      01        23        023              0.281000      -1.332611       0.000000       0.215703   -9999.000000   -9999.000000       0.088300   -9999.000000
57196     57196     henan          114.8617       33.4611          106       179     2012      01        24        024              0.281000       0.049316       0.155724       0.231728       0.102000   -9999.000000   -9999.000000   -9999.000000
57196     57196     henan          114.8617       33.4611          106       179     2012      01        25        025              0.280833      -0.190948       0.556335       0.231066       0.102000   -9999.000000       0.095200       0.236000
57196     57196     henan          114.8617       33.4611          106       179     2012      01        26        026              0.280625       0.968048       1.172541       0.246094   -9999.000000   -9999.000000   -9999.000000   -9999.000000
57196     57196     henan          114.8617       33.4611          106       179     2012      01        27        027              0.280750       2.103851       1.369339       0.270675   -9999.000000   -9999.000000       0.099200       0.388000
57196     57196     henan          114.8617       33.4611          106       179     2012      01        28        028              0.281000       3.756500       0.359764       0.295140       0.089000   -9999.000000       0.100500   -9999.000000
57196     57196     henan          114.8617       33.4611          106       179     2012      01        29        029              0.281000       3.160553       0.041584       0.309194   -9999.000000   -9999.000000       0.104100   -9999.000000
57196     57196     henan          114.8617       33.4611          106       179     2012      01        30        030              0.281000       1.995758       0.000000       0.293555       0.103000   -9999.000000       0.112100       0.410000
57196     57196     henan          114.8617       33.4611          106       179     2012      01        31        031              0.281000       2.705353       0.048494       0.296153   -9999.000000   -9999.000000   -9999.000000   -9999.000000
57196     57196     henan          114.8617       33.4611          106       179     2012      02        01        032              0.280542       4.920074       0.000000       0.304803   -9999.000000   -9999.000000   -9999.000000       0.242000
57196     57196     henan          114.8617       33.4611          106       179     2012      02        02        033              0.279000       0.839783       0.280193       0.268021       0.104000   -9999.000000       0.060800   -9999.000000
57196     57196     henan          114.8617       33.4611          106       179     2012      02        03        034              0.278667       0.943115       0.000000       0.249892       0.096000   -9999.000000       0.101600       0.187000
57196     57196     henan          114.8617       33.4611          106       179     2012      02        04        035              0.277958       2.512909       0.256643       0.271241   -9999.000000   -9999.000000       0.100600       0.335000
57196     57196     henan          114.8617       33.4611          106       179     2012      02        05        036              0.279292       1.636139       0.000000       0.275820   -9999.000000   -9999.000000       0.106200   -9999.000000
57196     57196     henan          114.8617       33.4611          106       179     2012      02        06        037              0.279333       4.377563       0.255738       0.298332   -9999.000000   -9999.000000   -9999.000000       0.301000
57196     57196     henan          114.8617       33.4611          106       179     2012      02        07        038              0.277708       4.773407       0.127871       0.288259   -9999.000000   -9999.000000   -9999.000000   -9999.000000
57196     57196     henan          114.8617       33.4611          106       179     2012      02        08        039              0.276917       1.579407       0.176508       0.253116   -9999.000000   -9999.000000       0.081800       0.117000
57196     57196     henan          114.8617       33.4611          106       179     2012      02        09        040              0.276708       0.947083       1.275223       0.244048   -9999.000000   -9999.000000       0.122700       0.324000
57196     57196     henan          114.8617       33.4611          106       179     2012      02        10        041              0.276625       1.550873       0.220036       0.257199   -9999.000000   -9999.000000       0.114200       0.352000
57196     57196     henan          114.8617       33.4611          106       179     2012      02        11        042              0.276333       3.038605       0.000000       0.260878   -9999.000000   -9999.000000       0.119800       0.184000
57196     57196     henan          114.8617       33.4611          106       179     2012      02        12        043              0.276000       4.089447       0.000000       0.279542   -9999.000000   -9999.000000   -9999.000000   -9999.000000
57196     57196     henan          114.8617       33.4611          106       179     2012      02        13        044              0.276458       2.179260       0.000000       0.281081   -9999.000000   -9999.000000   -9999.000000       0.253000
57196     57196     henan          114.8617       33.4611          106       179     2012      02        14        045              0.276458       3.882416       0.000000       0.285707       0.093000   -9999.000000       0.101800   -9999.000000
57196     57196     henan          114.8617       33.4611          106       179     2012      02        15        046              0.275750       5.105743       0.000000       0.292797       0.097000   -9999.000000       0.108600       0.319000
57196     57196     henan          114.8617       33.4611          106       179     2012      02        16        047              0.274583       4.504150       0.000000       0.292319   -9999.000000   -9999.000000       0.105200       0.183000
57196     57196     henan          114.8617       33.4611          106       179     2012      02        17        048              0.273500       3.820587       0.000000       0.287055   -9999.000000   -9999.000000   -9999.000000   -9999.000000
57196     57196     henan          114.8617       33.4611          106       179     2012      02        18        049              0.272458       4.182648       0.000000       0.273185       0.075000   -9999.000000   -9999.000000       0.116000
57196     57196     henan          114.8617       33.4611          106       179     2012      02        19        050              0.272250       4.102814       0.140558       0.271327       0.081000   -9999.000000       0.068200   -9999.000000
57196     57196     henan          114.8617       33.4611          106       179     2012      02        20        051              0.272000       5.928101       0.000000       0.281387       0.086000   -9999.000000       0.083600       0.320000
57196     57196     henan          114.8617       33.4611          106       179     2012      02        21        052              0.272261       5.681244       0.000000       0.284847   -9999.000000   -9999.000000   -9999.000000   -9999.000000
57196     57196     henan          114.8617       33.4611          106       179     2012      02        22        053              0.271708       9.152405       0.000000       0.282417       0.109000   -9999.000000       0.080000   -9999.000000
57196     57196     henan          114.8617       33.4611          106       179     2012      02        23        054              0.269333       9.062531       0.000000       0.281440       0.103000   -9999.000000   -9999.000000       0.312000
57196     57196     henan          114.8617       33.4611          106       179     2012      02        24        055              0.267042       5.337585       0.000000       0.280160       0.098000   -9999.000000   -9999.000000   -9999.000000
57196     57196     henan          114.8617       33.4611          106       179     2012      02        25        056              0.266375       3.598389       0.135938       0.277230       0.092000   -9999.000000       0.059400       0.341000
57196     57196     henan          114.8617       33.4611          106       179     2012      02        26        057              0.264958       4.470306       0.000000       0.275439   -9999.000000   -9999.000000       0.080200   -9999.000000
57196     57196     henan          114.8617       33.4611          106       179     2012      02        27        058              0.262958       5.196594       1.365796       0.269336   -9999.000000   -9999.000000   -9999.000000   -9999.000000
57196     57196     henan          114.8617       33.4611          106       179     2012      02        28        059              0.261875       5.072449       0.000000       0.268249       0.071000   -9999.000000       0.051600       0.310000
57196     57196     henan          114.8617       33.4611          106       179     2012      02        29        060              0.000000   -9999.000000       0.246641   -9999.000000       0.113000   -9999.000000   -9999.000000   -9999.000000
57196     57196     henan          114.8617       33.4611          106       179     2012      03        01        061              0.259417       6.793945       2.484622       0.271757   -9999.000000   -9999.000000       0.058400       0.536000
57196     57196     henan          114.8617       33.4611          106       179     2012      03        02        062              0.258000       5.294556       0.076382       0.291282   -9999.000000   -9999.000000       0.065400   -9999.000000
57196     57196     henan          114.8617       33.4611          106       179     2012      03        03        063              0.257708       4.750671       0.077939       0.289310   -9999.000000   -9999.000000       0.066900       0.514000
57196     57196     henan          114.8617       33.4611          106       179     2012      03        04        064              0.257000       3.606506       0.283303       0.286707   -9999.000000   -9999.000000       0.063200       0.406000
57196     57196     henan          114.8617       33.4611          106       179     2012      03        05        065              0.257542       4.115112       0.128207       0.285266       0.117000   -9999.000000   -9999.000000   -9999.000000
57196     57196     henan          114.8617       33.4611          106       179     2012      03        06        066              0.258083       6.776611       0.000000       0.284804       0.108000   -9999.000000   -9999.000000       0.189000
57196     57196     henan          114.8617       33.4611          106       179     2012      03        07        067              0.000000       8.205383       0.000000       0.278783       0.102000   -9999.000000       0.055200   -9999.000000
57196     57196     henan          114.8617       33.4611          106       179     2012      03        08        068              0.257458       8.991333       0.000000       0.275094   -9999.000000   -9999.000000       0.088600       0.225000
57196     57196     henan          114.8617       33.4611          106       179     2012      03        09        069              0.257042       7.516663       0.000000       0.273534   -9999.000000   -9999.000000       0.078900       0.270000
57196     57196     henan          114.8617       33.4611          106       179     2012      03        10        070              0.256478       7.603027       0.000000       0.271130       0.113500   -9999.000000       0.081900       0.275000
57196     57196     henan          114.8617       33.4611          106       179     2012      03        11        071              0.254667      10.505310       0.000000       0.267173       0.116000   -9999.000000   -9999.000000       0.012000
57196     57196     henan          114.8617       33.4611          106       179     2012      03        12        072              0.252333       6.701904       0.000000       0.263122       0.114000   -9999.000000       0.090700   -9999.000000
57196     57196     henan          114.8617       33.4611          106       179     2012      03        13        073              0.252208       7.939941       0.247269       0.261635   -9999.000000   -9999.000000       0.067900       0.090000
57196     57196     henan          114.8617       33.4611          106       179     2012      03        14        074              0.252000      11.897797       0.145524       0.258189       0.128000       0.063000       0.084400   -9999.000000
57196     57196     henan          114.8617       33.4611          106       179     2012      03        15        075              0.250792      13.111969       1.820189       0.254975       0.161000   -9999.000000       0.099200       0.462000
57196     57196     henan          114.8617       33.4611          106       179     2012      03        16        076              0.250083       8.392914       0.123067       0.271924       0.129500   -9999.000000       0.083000       0.231000
57196     57196     henan          114.8617       33.4611          106       179     2012      03        17        077              0.249000      11.715210       0.000000       0.268990       0.103000   -9999.000000   -9999.000000   -9999.000000
57196     57196     henan          114.8617       33.4611          106       179     2012      03        18        078              0.247000      13.281342       0.143311       0.262530   -9999.000000   -9999.000000       0.074500       0.129000
57196     57196     henan          114.8617       33.4611          106       179     2012      03        19        079              0.245875       8.594086       2.361706       0.262514       0.143000   -9999.000000       0.130200   -9999.000000
57196     57196     henan          114.8617       33.4611          106       179     2012      03        20        080              0.244458       5.012177       0.306446       0.283887       0.110000   -9999.000000       0.138700       0.149000
57196     57196     henan          114.8617       33.4611          106       179     2012      03        21        081              0.272792       6.351898      50.327744       0.275083       0.231500   -9999.000000       0.100700   -9999.000000
57196     57196     henan          114.8617       33.4611          106       179     2012      03        22        082              0.291792       6.436035       0.450911       0.372310       0.233000   -9999.000000   -9999.000000   -9999.000000
57196     57196     henan          114.8617       33.4611          106       179     2012      03        23        083              0.288375       5.910126       0.000000       0.379455       0.180000   -9999.000000   -9999.000000       0.329000
57196     57196     henan          114.8617       33.4611          106       179     2012      03        24        084              0.286792       9.765594       0.000000       0.360397   -9999.000000       0.149600   -9999.000000   -9999.000000
57196     57196     henan          114.8617       33.4611          106       179     2012      03        25        085              0.000000      12.692017       0.000000       0.349041       0.201000       0.064600       0.143100       0.173000
57196     57196     henan          114.8617       33.4611          106       179     2012      03        26        086              0.286522      14.542084       0.000000       0.340586       0.153500   -9999.000000       0.145500   -9999.000000
57196     57196     henan          114.8617       33.4611          106       179     2012      03        27        087              0.286542      16.336151       0.000000       0.333450       0.159500   -9999.000000       0.147600   -9999.000000
57196     57196     henan          114.8617       33.4611          106       179     2012      03        28        088              0.286750      17.964569       0.065322       0.326001       0.152000   -9999.000000   -9999.000000       0.218000
57196     57196     henan          114.8617       33.4611          106       179     2012      03        29        089              0.286542      18.241852       0.048072       0.318874   -9999.000000   -9999.000000       0.149900   -9999.000000
57196     57196     henan          114.8617       33.4611          106       179     2012      03        30        090              0.284583      16.573578       0.342227       0.317927       0.182000   -9999.000000       0.128800       0.158000
57196     57196     henan          114.8617       33.4611          106       179     2012      03        31        091              0.284625      13.740417       0.620905       0.315099       0.169000   -9999.000000       0.151500   -9999.000000
57196     57196     henan          114.8617       33.4611          106       179     2012      04        01        092              0.285000      16.170410       0.000000       0.305619       0.190000   -9999.000000       0.141100       0.068000
57196     57196     henan          114.8617       33.4611          106       179     2012      04        02        093              0.282917      17.967865       1.360554       0.298814       0.187000   -9999.000000       0.147300       0.060000
57196     57196     henan          114.8617       33.4611          106       179     2012      04        03        094              0.282417      12.114594       0.000000       0.296646   -9999.000000   -9999.000000   -9999.000000   -9999.000000
57196     57196     henan          114.8617       33.4611          106       179     2012      04        04        095              0.281750      14.392242       0.000000       0.291613       0.210000   -9999.000000       0.121500       0.034000
57196     57196     henan          114.8617       33.4611          106       179     2012      04        05        096              0.281667      16.202362       0.000000       0.288325       0.167000   -9999.000000       0.157500   -9999.000000
57196     57196     henan          114.8617       33.4611          106       179     2012      04        06        097              0.281458      17.459930       0.000000       0.281001       0.177000   -9999.000000       0.137500       0.056000
57196     57196     henan          114.8617       33.4611          106       179     2012      04        07        098              0.280417      18.298920       0.000000       0.272879       0.160000   -9999.000000       0.142500       0.091000
57196     57196     henan          114.8617       33.4611          106       179     2012      04        08        099              0.279833      19.385468       0.000000       0.266244       0.151000   -9999.000000   -9999.000000       0.081000
57196     57196     henan          114.8617       33.4611          106       179     2012      04        09        100              0.276750      21.271179       0.871597       0.258739       0.193000   -9999.000000   -9999.000000       0.031000
57196     57196     henan          114.8617       33.4611          106       179     2012      04        10        101              0.275500      18.387177       0.172798       0.265172       0.168000   -9999.000000       0.107400   -9999.000000
57196     57196     henan          114.8617       33.4611          106       179     2012      04        11        102              0.273917      19.337921       0.000000       0.264776       0.219000   -9999.000000       0.156600       0.113000
57196     57196     henan          114.8617       33.4611          106       179     2012      04        12        103              0.270250      19.383423       2.023164       0.257814       0.235000   -9999.000000       0.134000   -9999.000000
57196     57196     henan          114.8617       33.4611          106       179     2012      04        13        104              0.270292      13.364868       0.000000       0.271877       0.194000   -9999.000000       0.149100       0.045000
57196     57196     henan          114.8617       33.4611          106       179     2012      04        14        105              0.269500      18.410614       0.034588       0.264988       0.253000   -9999.000000   -9999.000000       0.094000
57196     57196     henan          114.8617       33.4611          106       179     2012      04        15        106              0.268542      17.425018       0.000000       0.258918       0.240000   -9999.000000       0.158400   -9999.000000
57196     57196     henan          114.8617       33.4611          106       179     2012      04        16        107              0.270292      17.832947       0.000000       0.254059       0.198500   -9999.000000       0.135700       0.023000
57196     57196     henan          114.8617       33.4611          106       179     2012      04        17        108              0.279708      19.813507       0.000000       0.246428       0.204000   -9999.000000       0.134800   -9999.000000
57196     57196     henan          114.8617       33.4611          106       179     2012      04        18        109              0.284458      21.622711       0.000000       0.236877       0.171000   -9999.000000   -9999.000000       0.039000
57196     57196     henan          114.8617       33.4611          106       179     2012      04        19        110              0.284875      19.177673       0.000000       0.236882   -9999.000000   -9999.000000       0.139000   -9999.000000
57196     57196     henan          114.8617       33.4611          106       179     2012      04        20        111              0.282500      22.075226       1.561734       0.228975       0.213000   -9999.000000   -9999.000000   -9999.000000
57196     57196     henan          114.8617       33.4611          106       179     2012      04        21        112              0.283333      17.114197       0.000000       0.246037       0.205500   -9999.000000       0.106700       0.080000
57196     57196     henan          114.8617       33.4611          106       179     2012      04        22        113              0.284083      20.772430       0.000000       0.235460       0.188000   -9999.000000       0.151100   -9999.000000
57196     57196     henan          114.8617       33.4611          106       179     2012      04        23        114              0.286917      24.336334      68.981689       0.221645       0.167000   -9999.000000       0.138800       0.163000
57196     57196     henan          114.8617       33.4611          106       179     2012      04        24        115              0.296542      26.029724       4.498145       0.308697   -9999.000000   -9999.000000       0.196000   -9999.000000
57196     57196     henan          114.8617       33.4611          106       179     2012      04        25        116              0.000000      19.131042       0.166908       0.396626       0.255000   -9999.000000   -9999.000000       0.389000
57196     57196     henan          114.8617       33.4611          106       179     2012      04        26        117              0.291667      18.379517       0.000000       0.369229       0.178000   -9999.000000   -9999.000000       0.058000
57196     57196     henan          114.8617       33.4611          106       179     2012      04        27        118              0.292125      20.665833       0.083561       0.354208       0.187500       0.064100   -9999.000000   -9999.000000
57196     57196     henan          114.8617       33.4611          106       179     2012      04        28        119              0.291792      23.275177       0.000000       0.343925       0.166000   -9999.000000       0.163300       0.204000
57196     57196     henan          114.8617       33.4611          106       179     2012      04        29        120              0.290917      23.011322       0.000000       0.333662       0.175000   -9999.000000       0.144200   -9999.000000
57196     57196     henan          114.8617       33.4611          106       179     2012      04        30        121              0.288042      22.395844       0.075279       0.325551       0.223000       0.150200       0.139100       0.134000
57196     57196     henan          114.8617       33.4611          106       179     2012      05        01        122              0.287875      20.076721       0.132456       0.325256       0.229000   -9999.000000   -9999.000000       0.040000
57196     57196     henan          114.8617       33.4611          106       179     2012      05        02        123              0.288500      21.337891       0.000000       0.320680       0.186500       0.026000       0.134100   -9999.000000
57196     57196     henan          114.8617       33.4611          106       179     2012      05        03        124              0.287958      23.858276       0.000000       0.310797       0.184500   -9999.000000       0.125600       0.068000
57196     57196     henan          114.8617       33.4611          106       179     2012      05        04        125              0.288261      24.699249       0.000000       0.303745       0.146000   -9999.000000       0.139300   -9999.000000
57196     57196     henan          114.8617       33.4611          106       179     2012      05        05        126              0.287526      25.556091       0.000000       0.293432   -9999.000000   -9999.000000       0.127700       0.183000
57196     57196     henan          114.8617       33.4611          106       179     2012      05        06        127              0.286542      26.595551       0.000000       0.280810       0.203000   -9999.000000   -9999.000000       0.243000
57196     57196     henan          114.8617       33.4611          106       179     2012      05        07        128              0.294708      27.768921      16.373537       0.269593   -9999.000000   -9999.000000   -9999.000000       0.285000
57196     57196     henan          114.8617       33.4611          106       179     2012      05        08        129              0.295167      22.834290       0.538242       0.346898       0.206500   -9999.000000       0.084400       0.141000
57196     57196     henan          114.8617       33.4611          106       179     2012      05        09        130              0.294083      23.955048       0.565068       0.331574       0.165000   -9999.000000       0.112400   -9999.000000
57196     57196     henan          114.8617       33.4611          106       179     2012      05        10        131              0.293125      25.739319       0.000000       0.320783   -9999.000000   -9999.000000       0.100700       0.167000
57196     57196     henan          114.8617       33.4611          106       179     2012      05        11        132              0.292958      25.136749       0.000000       0.310906       0.177000   -9999.000000       0.103500   -9999.000000
57196     57196     henan          114.8617       33.4611          106       179     2012      05        12        133              0.295417      26.030823       4.588767       0.298532       0.199000   -9999.000000   -9999.000000       0.297000
57196     57196     henan          114.8617       33.4611          106       179     2012      05        13        134              0.295958      21.629456       0.000000       0.319510       0.167500   -9999.000000   -9999.000000       0.328000
57196     57196     henan          114.8617       33.4611          106       179     2012      05        14        135              0.294042      23.244568       0.000000       0.309542       0.139000   -9999.000000       0.096100   -9999.000000
57196     57196     henan          114.8617       33.4611          106       179     2012      05        15        136              0.293542      23.338226       0.000000       0.298476   -9999.000000   -9999.000000       0.133700       0.233000
57196     57196     henan          114.8617       33.4611          106       179     2012      05        16        137              0.293542      24.716675       0.822686       0.284975       0.191000   -9999.000000       0.111900   -9999.000000
57196     57196     henan          114.8617       33.4611          106       179     2012      05        17        138              0.292792      25.795746       0.000000       0.270237       0.139500   -9999.000000       0.124300       0.235000
57196     57196     henan          114.8617       33.4611          106       179     2012      05        18        139              0.290125      27.480499       0.424406       0.254394       0.157500   -9999.000000   -9999.000000   -9999.000000
57196     57196     henan          114.8617       33.4611          106       179     2012      05        19        140              0.286125      27.072693       0.000000       0.246557       0.132000   -9999.000000       0.115300   -9999.000000
57196     57196     henan          114.8617       33.4611          106       179     2012      05        20        141              0.279292      27.524658       0.000000       0.231756       0.135000   -9999.000000       0.125600       0.275000
57196     57196     henan          114.8617       33.4611          106       179     2012      05        21        142              0.270542      26.374664       0.000000       0.219318       0.121000   -9999.000000       0.109000   -9999.000000
57196     57196     henan          114.8617       33.4611          106       179     2012      05        22        143              0.263042      26.379547       0.026669       0.211173       0.134000   -9999.000000       0.102700       0.318000
57196     57196     henan          114.8617       33.4611          106       179     2012      05        23        144              0.256375      24.653015       0.000000       0.209613   -9999.000000   -9999.000000   -9999.000000   -9999.000000
57196     57196     henan          114.8617       33.4611          106       179     2012      05        24        145              0.251583      25.834930       0.491384       0.206400   -9999.000000   -9999.000000   -9999.000000       0.254000
57196     57196     henan          114.8617       33.4611          106       179     2012      05        25        146              0.000000      25.054047       0.104910       0.207179       0.102000   -9999.000000       0.072700       0.400000
57196     57196     henan          114.8617       33.4611          106       179     2012      05        26        147              0.242625      25.139954       0.000000       0.204996   -9999.000000   -9999.000000       0.108600   -9999.000000
57196     57196     henan          114.8617       33.4611          106       179     2012      05        27        148              0.236167      28.871338       0.832213       0.193697       0.131000   -9999.000000       0.098700       0.373000
57196     57196     henan          114.8617       33.4611          106       179     2012      05        28        149              0.230042      27.568970       0.000000       0.192834       0.102500   -9999.000000       0.103200   -9999.000000
57196     57196     henan          114.8617       33.4611          106       179     2012      05        29        150              0.224958      29.369080       1.465360       0.186571       0.138000   -9999.000000   -9999.000000       0.141000
57196     57196     henan          114.8617       33.4611          106       179     2012      05        30        151              0.224250      22.758545       0.000000       0.207950       0.092000   -9999.000000   -9999.000000   -9999.000000
57196     57196     henan          114.8617       33.4611          106       179     2012      05        31        152              0.222043      27.836792       0.206102       0.198971   -9999.000000   -9999.000000   -9999.000000   -9999.000000
57196     57196     henan          114.8617       33.4611          106       179     2012      06        01        153              0.219708      27.479462       0.038769       0.191714       0.086000   -9999.000000       0.114200       0.236000
57196     57196     henan          114.8617       33.4611          106       179     2012      06        02        154              0.218042      25.176849       0.000000       0.191737       0.065500   -9999.000000       0.100800   -9999.000000
57196     57196     henan          114.8617       33.4611          106       179     2012      06        03        155              0.217458      29.301819       0.000000       0.185216       0.070500   -9999.000000       0.107900       0.190000
57196     57196     henan          114.8617       33.4611          106       179     2012      06        04        156              0.221583      26.576935       0.000000       0.184218       0.068000   -9999.000000   -9999.000000       0.373000
57196     57196     henan          114.8617       33.4611          106       179     2012      06        05        157              0.221042      30.735931       1.508607       0.181203   -9999.000000   -9999.000000       0.051900       0.300000
57196     57196     henan          114.8617       33.4611          106       179     2012      06        06        158              0.217083      30.959198       1.676194       0.193007       0.103000   -9999.000000       0.069600       0.416000
57196     57196     henan          114.8617       33.4611          106       179     2012      06        07        159              0.219250      24.772156       0.000000       0.223520       0.079000   -9999.000000       0.069800   -9999.000000
57196     57196     henan          114.8617       33.4611          106       179     2012      06        08        160              0.224000      29.092926       0.000000       0.205666       0.084000   -9999.000000       0.076400       0.366000
57196     57196     henan          114.8617       33.4611          106       179     2012      06        09        161              0.227333      31.912811       0.000000       0.187324       0.082000   -9999.000000   -9999.000000   -9999.000000
57196     57196     henan          114.8617       33.4611          106       179     2012      06        10        162              0.227750      34.861725       0.000000       0.180862       0.094000   -9999.000000   -9999.000000       0.358000
57196     57196     henan          114.8617       33.4611          106       179     2012      06        11        163              0.000000      33.424866       0.000000       0.180562       0.078000   -9999.000000       0.043100       0.384000
57196     57196     henan          114.8617       33.4611          106       179     2012      06        12        164              0.223625      31.533997       0.000000       0.179235       0.078000   -9999.000000       0.070800   -9999.000000
57196     57196     henan          114.8617       33.4611          106       179     2012      06        13        165              0.222292      33.788788       3.229717       0.176639       0.075500   -9999.000000       0.081100       0.427000
57196     57196     henan          114.8617       33.4611          106       179     2012      06        14        166              0.218042      33.776917       0.000000       0.197788       0.083500   -9999.000000       0.088700   -9999.000000
57196     57196     henan          114.8617       33.4611          106       179     2012      06        15        167              0.216958      30.099976       0.000000       0.187147       0.090000   -9999.000000   -9999.000000       0.354000
57196     57196     henan          114.8617       33.4611          106       179     2012      06        16        168              0.215500      31.882355       0.000000       0.179934   -9999.000000   -9999.000000       0.072900   -9999.000000
57196     57196     henan          114.8617       33.4611          106       179     2012      06        17        169              0.211292      33.083679       0.000000       0.177501       0.084000   -9999.000000       0.059600   -9999.000000
57196     57196     henan          114.8617       33.4611          106       179     2012      06        18        170              0.237750      30.558777       2.258499       0.179334       0.090500   -9999.000000       0.061500       0.367000
57196     57196     henan          114.8617       33.4611          106       179     2012      06        19        171              0.284250      33.034210       0.000000       0.177990       0.090000   -9999.000000       0.078600   -9999.000000
57196     57196     henan          114.8617       33.4611          106       179     2012      06        20        172              0.282375      33.644897       0.000000       0.177450       0.089000   -9999.000000       0.075000       0.420000
57196     57196     henan          114.8617       33.4611          106       179     2012      06        21        173              0.281208      33.886047       0.000000       0.176586   -9999.000000   -9999.000000   -9999.000000   -9999.000000
57196     57196     henan          114.8617       33.4611          106       179     2012      06        22        174              0.281250      33.888031       0.000000       0.176295       0.093000   -9999.000000       0.052500       0.495000
57196     57196     henan          114.8617       33.4611          106       179     2012      06        23        175              0.280667      35.790436       0.000000       0.175966       0.086000   -9999.000000       0.059100       0.430000
57196     57196     henan          114.8617       33.4611          106       179     2012      06        24        176              0.279167      35.323120       0.000000       0.175416       0.093000   -9999.000000       0.065400   -9999.000000
57196     57196     henan          114.8617       33.4611          106       179     2012      06        25        177              0.276458      35.136566       0.557200       0.175416       0.084000   -9999.000000       0.054700       0.386000
57196     57196     henan          114.8617       33.4611          106       179     2012      06        26        178              0.273762      33.901947       0.000000       0.176142       0.098000   -9999.000000   -9999.000000   -9999.000000
57196     57196     henan          114.8617       33.4611          106       179     2012      06        27        179              0.268375      33.326996       0.668839       0.176281       0.119000   -9999.000000   -9999.000000       0.305000
57196     57196     henan          114.8617       33.4611          106       179     2012      06        28        180              0.266292      28.382050       2.905804       0.180564       0.136000   -9999.000000       0.046100       0.805000
57196     57196     henan          114.8617       33.4611          106       179     2012      06        29        181              0.271792      27.654297      12.602312       0.210336       0.111000   -9999.000000       0.043200       0.599000
57196     57196     henan          114.8617       33.4611          106       179     2012      06        30        182              0.292917      28.897308      16.215076       0.237582   -9999.000000   -9999.000000       0.063400   -9999.000000
57196     57196     henan          114.8617       33.4611          106       179     2012      07        01        183              0.292000      25.731537       4.398466       0.349500       0.199000   -9999.000000       0.078200   -9999.000000
57196     57196     henan          114.8617       33.4611          106       179     2012      07        02        184              0.295542      27.048431      10.124759       0.325179       0.164000   -9999.000000   -9999.000000       0.931000
57196     57196     henan          114.8617       33.4611          106       179     2012      07        03        185              0.292417      26.541382       0.727911       0.356383       0.157000   -9999.000000       0.068700       0.794000
57196     57196     henan          114.8617       33.4611          106       179     2012      07        04        186              0.298375      29.483765      87.132790       0.334640   -9999.000000   -9999.000000       0.074500       0.747000
57196     57196     henan          114.8617       33.4611          106       179     2012      07        05        187              0.297000      28.102783      16.670954       0.435103   -9999.000000   -9999.000000       0.090200       0.926000
57196     57196     henan          114.8617       33.4611          106       179     2012      07        06        188              0.293167      25.508942       0.181945       0.419780   -9999.000000   -9999.000000       0.113200   -9999.000000
57196     57196     henan          114.8617       33.4611          106       179     2012      07        07        189              0.292042      28.914429       6.953385       0.382606   -9999.000000   -9999.000000       0.072500       0.884000
57196     57196     henan          114.8617       33.4611          106       179     2012      07        08        190              0.296750      29.635834       9.708272       0.383280       0.180000   -9999.000000   -9999.000000   -9999.000000
57196     57196     henan          114.8617       33.4611          106       179     2012      07        09        191              0.295625      30.857697       3.840323       0.385662       0.181000   -9999.000000       0.071900       0.934000
57196     57196     henan          114.8617       33.4611          106       179     2012      07        10        192              0.293500      30.730377       0.072910       0.377531       0.180000   -9999.000000       0.090400       0.843000
57196     57196     henan          114.8617       33.4611          106       179     2012      07        11        193              0.294167      29.899750       3.158440       0.365915       0.200000   -9999.000000       0.082800   -9999.000000
57196     57196     henan          114.8617       33.4611          106       179     2012      07        12        194              0.292500      32.991272       0.000000       0.350896   -9999.000000   -9999.000000       0.082000       0.685000
57196     57196     henan          114.8617       33.4611          106       179     2012      07        13        195              0.292000      31.612305       4.566390       0.342401       0.215000   -9999.000000   -9999.000000   -9999.000000
57196     57196     henan          114.8617       33.4611          106       179     2012      07        14        196              0.291583      28.889832       0.000000       0.346160       0.206000   -9999.000000   -9999.000000       0.748000
57196     57196     henan          114.8617       33.4611          106       179     2012      07        15        197              0.290667      26.871399       0.000000       0.345527       0.209500   -9999.000000       0.055700   -9999.000000
57196     57196     henan          114.8617       33.4611          106       179     2012      07        16        198              0.285875      28.477356       0.000000       0.332757       0.190000   -9999.000000       0.078600   -9999.000000
57196     57196     henan          114.8617       33.4611          106       179     2012      07        17        199              0.276792      29.260193       0.000000       0.321459       0.165000   -9999.000000       0.067400       0.701000
57196     57196     henan          114.8617       33.4611          106       179     2012      07        18        200              0.264958      29.880737       0.117321       0.312428   -9999.000000   -9999.000000       0.067400   -9999.000000
57196     57196     henan          114.8617       33.4611          106       179     2012      07        19        201              0.254167      30.240021       0.000000       0.302673       0.204000   -9999.000000   -9999.000000       0.701000
57196     57196     henan          114.8617       33.4611          106       179     2012      07        20        202              0.244542      30.818481       1.379354       0.293001       0.186000   -9999.000000       0.070700   -9999.000000
57196     57196     henan          114.8617       33.4611          106       179     2012      07        21        203              0.234583      32.003479       0.000000       0.283275       0.257500   -9999.000000       0.066000       0.679000
57196     57196     henan          114.8617       33.4611          106       179     2012      07        22        204              0.227375      33.522827       0.823117       0.270169       0.244000   -9999.000000       0.068400       0.717000
57196     57196     henan          114.8617       33.4611          106       179     2012      07        23        205              0.221208      32.194031       0.397419       0.259215   -9999.000000   -9999.000000       0.094800   -9999.000000
57196     57196     henan          114.8617       33.4611          106       179     2012      07        24        206              0.216917      32.828522      11.897674       0.247155       0.302000   -9999.000000   -9999.000000       0.963000
57196     57196     henan          114.8617       33.4611          106       179     2012      07        25        207              0.213542      33.102539       0.576998       0.305597       0.249500   -9999.000000   -9999.000000   -9999.000000
57196     57196     henan          114.8617       33.4611          106       179     2012      07        26        208              0.210125      33.824921      26.671602       0.284940       0.258500   -9999.000000       0.077500       0.688000
57196     57196     henan          114.8617       33.4611          106       179     2012      07        27        209              0.206125      34.450592       1.212599       0.263482       0.201000   -9999.000000       0.108300       0.780000
57196     57196     henan          114.8617       33.4611          106       179     2012      07        28        210              0.217458      34.107513       0.300754       0.258241       0.212000   -9999.000000       0.089700       0.775000
57196     57196     henan          114.8617       33.4611          106       179     2012      07        29        211              0.227333      34.601532       0.000000       0.248060       0.261000   -9999.000000       0.089900       0.653000
57196     57196     henan          114.8617       33.4611          106       179     2012      07        30        212              0.223333      35.457458       2.480558       0.232890       0.271000   -9999.000000   -9999.000000   -9999.000000
57196     57196     henan          114.8617       33.4611          106       179     2012      07        31        213              0.217958      35.367706       1.184378       0.237187       0.261000   -9999.000000   -9999.000000       0.705000
57196     57196     henan          114.8617       33.4611          106       179     2012      08        01        214              0.214000      32.848999       0.944633       0.238007       0.368500   -9999.000000       0.071800       0.682000
57196     57196     henan          114.8617       33.4611          106       179     2012      08        02        215              0.210208      30.717804       0.000000       0.229558       0.305000   -9999.000000       0.098500       0.688000
57196     57196     henan          114.8617       33.4611          106       179     2012      08        03        216              0.206750      31.135834       1.606313       0.220759   -9999.000000   -9999.000000       0.089000       0.630000
57196     57196     henan          114.8617       33.4611          106       179     2012      08        04        217              0.214667      30.711273       2.927905       0.217362       0.430000   -9999.000000       0.102500   -9999.000000
57196     57196     henan          114.8617       33.4611          106       179     2012      08        05        218              0.217000      28.504517       0.000000       0.262451       0.367000   -9999.000000   -9999.000000       0.730000
57196     57196     henan          114.8617       33.4611          106       179     2012      08        06        219              0.215917      31.152771       0.000000       0.242386       0.397000   -9999.000000       0.077600   -9999.000000
57196     57196     henan          114.8617       33.4611          106       179     2012      08        07        220              0.212625      31.843628       0.470582       0.223755       0.308000   -9999.000000   -9999.000000       0.728000
57196     57196     henan          114.8617       33.4611          106       179     2012      08        08        221              0.209583      32.038147       0.000000       0.210930       0.310000   -9999.000000       0.080800       0.659000
57196     57196     henan          114.8617       33.4611          106       179     2012      08        09        222              0.243875      33.323578       6.398468       0.200179       0.418000   -9999.000000       0.078900   -9999.000000
57196     57196     henan          114.8617       33.4611          106       179     2012      08        10        223              0.271870      31.896393       0.439745       0.242820       0.435000       0.283000   -9999.000000       0.763000
57196     57196     henan          114.8617       33.4611          106       179     2012      08        11        224              0.273625      30.195251       0.000000       0.247541       0.419000       0.105800   -9999.000000   -9999.000000
57196     57196     henan          114.8617       33.4611          106       179     2012      08        12        225              0.271833      31.573486       0.000000       0.230409       0.404000   -9999.000000       0.053300       0.669000
57196     57196     henan          114.8617       33.4611          106       179     2012      08        13        226              0.268792      31.940277       0.000000       0.213281       0.457000       0.028900       0.070000   -9999.000000
57196     57196     henan          114.8617       33.4611          106       179     2012      08        14        227              0.266958      27.421509       0.309057       0.207634   -9999.000000   -9999.000000       0.063600   -9999.000000
57196     57196     henan          114.8617       33.4611          106       179     2012      08        15        228              0.268261      28.066589       0.000000       0.204631       0.468000       0.218100       0.062600       0.760000
57196     57196     henan          114.8617       33.4611          106       179     2012      08        16        229              0.265958      29.548950       0.000000       0.199592       0.415500       0.104700   -9999.000000   -9999.000000
57196     57196     henan          114.8617       33.4611          106       179     2012      08        17        230              0.260875      30.323547       0.000000       0.190788       0.417500   -9999.000000       0.069500       0.727000
57196     57196     henan          114.8617       33.4611          106       179     2012      08        18        231              0.267917      32.473633       6.927646       0.186545       0.367000       0.131200       0.059300   -9999.000000
57196     57196     henan          114.8617       33.4611          106       179     2012      08        19        232              0.281708      32.933472       9.695542       0.229018   -9999.000000       0.064900       0.067000       0.772000
57196     57196     henan          114.8617       33.4611          106       179     2012      08        20        233              0.292917      31.329376      71.364578       0.258740   -9999.000000   -9999.000000       0.051900       0.911000
57196     57196     henan          114.8617       33.4611          106       179     2012      08        21        234              0.296542      27.903656       1.944072       0.406331       0.431000       0.186400       0.059900   -9999.000000
57196     57196     henan          114.8617       33.4611          106       179     2012      08        22        235              0.292542      25.504608       0.000000       0.396493       0.458000   -9999.000000   -9999.000000   -9999.000000
57196     57196     henan          114.8617       33.4611          106       179     2012      08        23        236              0.291792      23.757324       0.000000       0.368640       0.413000       0.224200       0.053400   -9999.000000
57196     57196     henan          114.8617       33.4611          106       179     2012      08        24        237              0.291042      24.913940       0.000000       0.353343       0.414000       0.248300       0.063100       0.782000
57196     57196     henan          114.8617       33.4611          106       179     2012      08        25        238              0.000000      25.571899       3.155324       0.342469   -9999.000000   -9999.000000       0.062200       0.784000
57196     57196     henan          114.8617       33.4611          106       179     2012      08        26        239              0.298208      27.333160      16.076105       0.338830       0.496000       0.210500       0.062400   -9999.000000
57196     57196     henan          114.8617       33.4611          106       179     2012      08        27        240              0.298833      25.923706      10.021832       0.369779       0.500000   -9999.000000   -9999.000000       0.901000
57196     57196     henan          114.8617       33.4611          106       179     2012      08        28        241              0.296042      25.645813       0.000000       0.387488       0.461000       0.217100   -9999.000000   -9999.000000
57196     57196     henan          114.8617       33.4611          106       179     2012      08        29        242              0.295083      27.482758       0.214476       0.363866       0.409000       0.110300       0.065700       0.845000
57196     57196     henan          114.8617       33.4611          106       179     2012      08        30        243              0.293208      29.537018       0.000000       0.351320   -9999.000000       0.122900       0.090700       0.793000
57196     57196     henan          114.8617       33.4611          106       179     2012      08        31        244              0.292083      29.456207       0.077684       0.341864       0.491000       0.054200       0.075600       0.832000
57196     57196     henan          114.8617       33.4611          106       179     2012      09        01        245              0.291833      29.032349       2.547160       0.336662       0.354000   -9999.000000       0.081200       0.736000
57196     57196     henan          114.8617       33.4611          106       179     2012      09        02        246              0.291417      29.618652       0.000000       0.332024       0.368500   -9999.000000   -9999.000000   -9999.000000
57196     57196     henan          114.8617       33.4611          106       179     2012      09        03        247              0.290304      25.643250       0.000000       0.332602       0.299000       0.111900       0.099500       0.760000
57196     57196     henan          114.8617       33.4611          106       179     2012      09        04        248              0.285875      26.288574       0.000000       0.320263       0.314000   -9999.000000       0.086700   -9999.000000
57196     57196     henan          114.8617       33.4611          106       179     2012      09        05        249              0.278958      25.812592       0.000000       0.309392       0.400000       0.118500       0.096300       0.775000
57196     57196     henan          114.8617       33.4611          106       179     2012      09        06        250              0.270542      26.372864       0.856453       0.300155       0.398000   -9999.000000       0.080900       0.783000
57196     57196     henan          114.8617       33.4611          106       179     2012      09        07        251              0.264083      27.068604       2.260257       0.293594       0.327500   -9999.000000       0.084400   -9999.000000
57196     57196     henan          114.8617       33.4611          106       179     2012      09        08        252              0.272875      27.586731       3.651413       0.292902       0.414500       0.150700   -9999.000000       0.882000
57196     57196     henan          114.8617       33.4611          106       179     2012      09        09        253              0.277542      24.240051       0.000000       0.318458       0.354000   -9999.000000       0.076700   -9999.000000
57196     57196     henan          114.8617       33.4611          106       179     2012      09        10        254              0.276167      25.067963       0.323782       0.303876   -9999.000000       0.121600       0.110600       0.785000
57196     57196     henan          114.8617       33.4611          106       179     2012      09        11        255              0.291875      25.610535      19.629234       0.296714       0.242000       0.134400       0.107500   -9999.000000
57196     57196     henan          114.8617       33.4611          106       179     2012      09        12        256              0.293417      23.539734       0.099892       0.362073       0.208000   -9999.000000       0.100000   -9999.000000
57196     57196     henan          114.8617       33.4611          106       179     2012      09        13        257              0.291667      22.210052       0.000000       0.346886       0.180000       0.070200   -9999.000000       0.851000
57196     57196     henan          114.8617       33.4611          106       179     2012      09        14        258              0.290125      21.402527       0.000000       0.332159       0.174000   -9999.000000   -9999.000000   -9999.000000
57196     57196     henan          114.8617       33.4611          106       179     2012      09        15        259              0.287542      22.451996       0.000000       0.320813   -9999.000000       0.164800       0.072300       0.806000
57196     57196     henan          114.8617       33.4611          106       179     2012      09        16        260              0.285833      22.623840       0.000000       0.310928       0.245000       0.163000       0.102300   -9999.000000
57196     57196     henan          114.8617       33.4611          106       179     2012      09        17        261              0.281125      23.171906       0.000000       0.303317       0.195000   -9999.000000       0.089500       0.725000
57196     57196     henan          114.8617       33.4611          106       179     2012      09        18        262              0.274208      22.627808       0.000000       0.297174       0.211500       0.162400       0.095800       0.784000
57196     57196     henan          114.8617       33.4611          106       179     2012      09        19        263              0.267542      23.878693       1.360918       0.289698       0.184000   -9999.000000   -9999.000000   -9999.000000
57196     57196     henan          114.8617       33.4611          106       179     2012      09        20        264              0.261625      24.418243       0.252268       0.289739       0.200000       0.155100       0.097600       0.812000
57196     57196     henan          114.8617       33.4611          106       179     2012      09        21        265              0.256083      24.547852       1.162330       0.285343   -9999.000000       0.108700       0.098300   -9999.000000
57196     57196     henan          114.8617       33.4611          106       179     2012      09        22        266              0.251000      24.169952       0.000000       0.286646       0.219000   -9999.000000       0.107900       0.729000
57196     57196     henan          114.8617       33.4611          106       179     2012      09        23        267              0.246208      25.357483       0.833917       0.277645       0.209500       0.093600       0.112800       0.794000
57196     57196     henan          114.8617       33.4611          106       179     2012      09        24        268              0.240875      25.359131       0.000000       0.270612       0.219500   -9999.000000   -9999.000000   -9999.000000
57196     57196     henan          114.8617       33.4611          106       179     2012      09        25        269              0.236417      25.692963       0.093175       0.263811       0.232000   -9999.000000   -9999.000000       0.653000
57196     57196     henan          114.8617       33.4611          106       179     2012      09        26        270              0.232083      25.802948       0.168787       0.259204   -9999.000000       0.112500       0.068900   -9999.000000
57196     57196     henan          114.8617       33.4611          106       179     2012      09        27        271              0.230143      25.268524       0.000000       0.255406       0.225000   -9999.000000       0.092400       0.590000
57196     57196     henan          114.8617       33.4611          106       179     2012      09        28        272              0.223067      24.963623       0.000000       0.248829       0.201000   -9999.000000       0.097800       0.656000
57196     57196     henan          114.8617       33.4611          106       179     2012      09        29        273              0.221375      21.129700       0.000000       0.238230       0.218000   -9999.000000       0.104500       0.717000
57196     57196     henan          114.8617       33.4611          106       179     2012      09        30        274              0.219250      21.134766       0.000000       0.231961       0.211000   -9999.000000   -9999.000000       0.498000
57196     57196     henan          114.8617       33.4611          106       179     2012      10        01        275              0.217375      21.600220       0.000000       0.226807       0.151000       0.136800   -9999.000000   -9999.000000
57196     57196     henan          114.8617       33.4611          106       179     2012      10        02        276              0.216792      22.618073       0.000000       0.221652       0.154000   -9999.000000       0.041500       0.482000
57196     57196     henan          114.8617       33.4611          106       179     2012      10        03        277              0.216083      23.179749       0.000000       0.216991       0.158000       0.103800       0.064900   -9999.000000
57196     57196     henan          114.8617       33.4611          106       179     2012      10        04        278              0.214542      23.379486       0.000000       0.212923       0.144000       0.126000       0.061000       0.568000
57196     57196     henan          114.8617       33.4611          106       179     2012      10        05        279              0.213000      22.950958       0.000000       0.211453       0.150000       0.083800       0.065500       0.592000
57196     57196     henan          114.8617       33.4611          106       179     2012      10        06        280              0.212000      21.225677       0.000000       0.213701       0.141000       0.114900   -9999.000000   -9999.000000
57196     57196     henan          114.8617       33.4611          106       179     2012      10        07        281              0.212000      22.551849       0.000000       0.210640   -9999.000000   -9999.000000       0.057000       0.567000
57196     57196     henan          114.8617       33.4611          106       179     2012      10        08        282              0.211792      23.099792       0.000000       0.208337       0.158000       0.122100       0.049600   -9999.000000
57196     57196     henan          114.8617       33.4611          106       179     2012      10        09        283              0.211125      23.657196       0.000000       0.204818       0.155000       0.076300       0.052500       0.552000
57196     57196     henan          114.8617       33.4611          106       179     2012      10        10        284              0.209375      22.974121       0.000000       0.201278       0.134000   -9999.000000       0.048200   -9999.000000
57196     57196     henan          114.8617       33.4611          106       179     2012      10        11        285              0.207875      21.369232       0.000000       0.196835       0.090000       0.073700   -9999.000000   -9999.000000
57196     57196     henan          114.8617       33.4611          106       179     2012      10        12        286              0.207292      21.455383       0.000000       0.195399   -9999.000000   -9999.000000   -9999.000000       0.585000
57196     57196     henan          114.8617       33.4611          106       179     2012      10        13        287              0.206792      21.453125       0.000000       0.197238       0.116000   -9999.000000       0.032600   -9999.000000
57196     57196     henan          114.8617       33.4611          106       179     2012      10        14        288              0.206417      22.234772       0.000000       0.196961       0.109000       0.028500       0.055300       0.621000
57196     57196     henan          114.8617       33.4611          106       179     2012      10        15        289              0.206292      23.145782       4.208458       0.196242       0.139500   -9999.000000       0.045300   -9999.000000
57196     57196     henan          114.8617       33.4611          106       179     2012      10        16        290              0.205833      22.953491       0.642627       0.205991       0.164000       0.324200       0.067100       0.945000
57196     57196     henan          114.8617       33.4611          106       179     2012      10        17        291              0.205625      17.702789       0.000000       0.257736       0.106000   -9999.000000   -9999.000000       0.609000
57196     57196     henan          114.8617       33.4611          106       179     2012      10        18        292              0.206125      16.974487       0.000000       0.237753       0.142000   -9999.000000   -9999.000000   -9999.000000
57196     57196     henan          114.8617       33.4611          106       179     2012      10        19        293              0.206708      18.807678       0.000000       0.229159       0.129000       0.088900       0.045000       0.570000
57196     57196     henan          114.8617       33.4611          106       179     2012      10        20        294              0.206875      19.064697       0.000000       0.226128       0.124500   -9999.000000       0.058700   -9999.000000
57196     57196     henan          114.8617       33.4611          106       179     2012      10        21        295              0.207500      20.887054       0.635472       0.221029       0.134500       0.096600       0.050800       0.502000
57196     57196     henan          114.8617       33.4611          106       179     2012      10        22        296              0.207208      21.190369       0.000000       0.222690   -9999.000000       0.166300       0.049500       0.542000
57196     57196     henan          114.8617       33.4611          106       179     2012      10        23        297              0.207042      17.023285       0.201987       0.218812   -9999.000000   -9999.000000   -9999.000000   -9999.000000
57196     57196     henan          114.8617       33.4611          106       179     2012      10        24        298              0.207875      17.645752       0.000000       0.215103   -9999.000000       0.143000       0.047100       0.582000
57196     57196     henan          114.8617       33.4611          106       179     2012      10        25        299              0.000000      18.646820       0.933063       0.214915       0.105000   -9999.000000       0.068700   -9999.000000
57196     57196     henan          114.8617       33.4611          106       179     2012      10        26        300              0.211083      19.387695       1.141130       0.214245       0.164000       0.306700       0.075400       0.876000
57196     57196     henan          114.8617       33.4611          106       179     2012      10        27        301              0.215250      16.567627       0.000000       0.240847       0.116000       0.218600       0.057700       0.605000
57196     57196     henan          114.8617       33.4611          106       179     2012      10        28        302              0.000000      18.368011       0.000000       0.234489       0.114000   -9999.000000   -9999.000000       0.621000
57196     57196     henan          114.8617       33.4611          106       179     2012      10        29        303              0.217000      19.232605       0.261542       0.229130       0.139000       0.083400   -9999.000000       0.642000
57196     57196     henan          114.8617       33.4611          106       179     2012      10        30        304              0.217208      17.214661       0.000000       0.231967       0.121000   -9999.000000       0.036400   -9999.000000
57196     57196     henan          114.8617       33.4611          106       179     2012      10        31        305              0.216625      15.427277       0.000000       0.227732       0.088000   -9999.000000       0.058600       0.461000
57196     57196     henan          114.8617       33.4611          106       179     2012      11        01        306              0.216500      14.419189       0.190619       0.221832       0.108500   -9999.000000       0.050600   -9999.000000
57196     57196     henan          114.8617       33.4611          106       179     2012      11        02        307              0.216375      15.451996       0.000000       0.220442       0.101000   -9999.000000       0.053200       0.518000
57196     57196     henan          114.8617       33.4611          106       179     2012      11        03        308              0.222667      16.335144       7.238093       0.217399   -9999.000000       0.256700   -9999.000000       0.923000
57196     57196     henan          114.8617       33.4611          106       179     2012      11        04        309              0.226958      10.734009       2.250337       0.284130   -9999.000000   -9999.000000       0.065400   -9999.000000
57196     57196     henan          114.8617       33.4611          106       179     2012      11        05        310              0.227375       9.934082       0.000000       0.267529       0.111000   -9999.000000       0.066700       0.424000
57196     57196     henan          114.8617       33.4611          106       179     2012      11        06        311              0.228125       9.605530       0.000000       0.259506       0.109000       0.062600       0.075000   -9999.000000
57196     57196     henan          114.8617       33.4611          106       179     2012      11        07        312              0.230208      11.218048       0.000000       0.255041       0.109000   -9999.000000       0.072100       0.523000
57196     57196     henan          114.8617       33.4611          106       179     2012      11        08        313              0.231000      12.790314       0.000000       0.253033   -9999.000000       0.075100   -9999.000000   -9999.000000
57196     57196     henan          114.8617       33.4611          106       179     2012      11        09        314              0.239833      11.564117       6.297752       0.253028       0.184000       0.158500   -9999.000000   -9999.000000
57196     57196     henan          114.8617       33.4611          106       179     2012      11        10        315              0.262042      12.291412       0.438365       0.284763       0.144000       0.103700       0.065200       0.839000
57196     57196     henan          114.8617       33.4611          106       179     2012      11        11        316              0.262208       9.753265       0.000000       0.297263       0.115000       0.139000       0.084900   -9999.000000
57196     57196     henan          114.8617       33.4611          106       179     2012      11        12        317              0.261708       8.882812       0.000000       0.284051       0.111000   -9999.000000       0.067900       0.633000
57196     57196     henan          114.8617       33.4611          106       179     2012      11        13        318              0.000000      10.633209       0.000000       0.279717       0.108000       0.125800       0.070200   -9999.000000
57196     57196     henan          114.8617       33.4611          106       179     2012      11        14        319              0.260625      10.789154       0.000000       0.275065   -9999.000000   -9999.000000   -9999.000000       0.439000
57196     57196     henan          114.8617       33.4611          106       179     2012      11        15        320              0.259958       9.303528       0.186295       0.271068       0.135000   -9999.000000   -9999.000000       0.525000
57196     57196     henan          114.8617       33.4611          106       179     2012      11        16        321              0.259167       9.317963       0.000000       0.269377       0.109000       0.077600       0.045300   -9999.000000
57196     57196     henan          114.8617       33.4611          106       179     2012      11        17        322              0.000000       9.137238       0.000000       0.267152       0.104000   -9999.000000       0.069900       0.531000
57196     57196     henan          114.8617       33.4611          106       179     2012      11        18        323              0.257208      11.209625       0.000000       0.265877       0.100000   -9999.000000       0.059700   -9999.000000
57196     57196     henan          114.8617       33.4611          106       179     2012      11        19        324              0.256708      11.638702       0.000000       0.265135   -9999.000000   -9999.000000       0.058700       0.383000
57196     57196     henan          114.8617       33.4611          106       179     2012      11        20        325              0.255792      11.029266       0.094474       0.263509       0.135000   -9999.000000   -9999.000000       0.551000
57196     57196     henan          114.8617       33.4611          106       179     2012      11        21        326              0.255333       9.359070       0.000000       0.264459       0.108500       0.044400       0.057800       0.572000
57196     57196     henan          114.8617       33.4611          106       179     2012      11        22        327              0.253917      10.705597       0.000000       0.265404       0.123000       0.109100       0.058000       0.506000
57196     57196     henan          114.8617       33.4611          106       179     2012      11        23        328              0.251583       9.380798       0.000000       0.267428       0.102000   -9999.000000       0.065900   -9999.000000
57196     57196     henan          114.8617       33.4611          106       179     2012      11        24        329              0.251000       6.625305       0.245374       0.265665       0.104000       0.123600       0.059800       0.396000
57196     57196     henan          114.8617       33.4611          106       179     2012      11        25        330              0.249875       8.343903       2.483516       0.265682   -9999.000000   -9999.000000   -9999.000000       0.724000
57196     57196     henan          114.8617       33.4611          106       179     2012      11        26        331              0.249250       5.911224       0.000000       0.289679   -9999.000000       0.127400   -9999.000000       0.713000
57196     57196     henan          114.8617       33.4611          106       179     2012      11        27        332              0.250375       6.808411       0.369323       0.279956       0.102500   -9999.000000       0.055700       0.419000
57196     57196     henan          114.8617       33.4611          106       179     2012      11        28        333              0.250875       8.965302       0.000000       0.279926       0.097000   -9999.000000       0.092700   -9999.000000
57196     57196     henan          114.8617       33.4611          106       179     2012      11        29        334              0.250792       6.716370       0.352915       0.276158       0.103000       0.045400       0.080900       0.441000
57196     57196     henan          114.8617       33.4611          106       179     2012      11        30        335              0.250833       6.083832       0.000000       0.275866   -9999.000000   -9999.000000       0.086500   -9999.000000
57196     57196     henan          114.8617       33.4611          106       179     2012      12        01        336              0.248250       7.262268       0.339702       0.274918   -9999.000000       0.113600   -9999.000000       0.554000
57196     57196     henan          114.8617       33.4611          106       179     2012      12        02        337              0.246958       3.884705       0.193039       0.277133   -9999.000000   -9999.000000   -9999.000000       0.455000
57196     57196     henan          114.8617       33.4611          106       179     2012      12        03        338              0.245500       3.899414       0.253610       0.279289       0.115000   -9999.000000       0.062500   -9999.000000
57196     57196     henan          114.8617       33.4611          106       179     2012      12        04        339              0.243792       5.317322       0.509391       0.273917       0.112000       0.089300       0.081700       0.344000
57196     57196     henan          114.8617       33.4611          106       179     2012      12        05        340              0.242208       5.707092       0.000000       0.278659   -9999.000000   -9999.000000       0.070500   -9999.000000
57196     57196     henan          114.8617       33.4611          106       179     2012      12        06        341              0.241333       5.340515       1.643190       0.273521   -9999.000000   -9999.000000       0.077000       0.431000
57196     57196     henan          114.8617       33.4611          106       179     2012      12        07        342              0.239625       5.614166       0.000000       0.273398       0.098000       0.041500   -9999.000000   -9999.000000
57196     57196     henan          114.8617       33.4611          106       179     2012      12        08        343              0.237125       4.911041       0.000000       0.270482       0.115000   -9999.000000       0.064300   -9999.000000
57196     57196     henan          114.8617       33.4611          106       179     2012      12        09        344              0.235708       3.809357       0.000000       0.262398       0.106000       0.086300       0.078900       0.334000
57196     57196     henan          114.8617       33.4611          106       179     2012      12        10        345              0.233625       2.843231       0.000000       0.253038       0.119000   -9999.000000       0.074300   -9999.000000
57196     57196     henan          114.8617       33.4611          106       179     2012      12        11        346              0.232000       2.641846       0.000000       0.248386   -9999.000000   -9999.000000       0.069900       0.419000
57196     57196     henan          114.8617       33.4611          106       179     2012      12        12        347              0.231833       2.297974       0.000000       0.245564   -9999.000000       0.035200   -9999.000000   -9999.000000
57196     57196     henan          114.8617       33.4611          106       179     2012      12        13        348              0.250125       3.697876       6.377983       0.263493   -9999.000000   -9999.000000   -9999.000000       0.745000
57196     57196     henan          114.8617       33.4611          106       179     2012      12        14        349              0.266000       2.049988       0.166882       0.298937   -9999.000000       0.239800       0.049700       0.687000
57196     57196     henan          114.8617       33.4611          106       179     2012      12        15        350              0.000000       2.229889       0.172306       0.296310   -9999.000000       0.295800       0.103700   -9999.000000
57196     57196     henan          114.8617       33.4611          106       179     2012      12        16        351              0.267000       2.400543       0.107233       0.297889   -9999.000000   -9999.000000       0.090300       0.722000
57196     57196     henan          114.8617       33.4611          106       179     2012      12        17        352              0.266958       2.780579       0.278315       0.300481   -9999.000000   -9999.000000       0.095500   -9999.000000
57196     57196     henan          114.8617       33.4611          106       179     2012      12        18        353              0.266042       2.326263       0.606872       0.290094   -9999.000000   -9999.000000   -9999.000000       0.530000
57196     57196     henan          114.8617       33.4611          106       179     2012      12        19        354              0.265000       1.857819       0.000000       0.269529   -9999.000000   -9999.000000       0.127600       0.489000
57196     57196     henan          114.8617       33.4611          106       179     2012      12        20        355              0.000000       1.648590       0.000000       0.270867   -9999.000000       0.062500       0.096100   -9999.000000
57196     57196     henan          114.8617       33.4611          106       179     2012      12        21        356              0.269333       1.095947       0.507739       0.267936   -9999.000000   -9999.000000       0.105700       0.432000
57196     57196     henan          114.8617       33.4611          106       179     2012      12        22        357              0.268167       1.117096       0.488021       0.261876   -9999.000000       0.094000       0.124300   -9999.000000
57196     57196     henan          114.8617       33.4611          106       179     2012      12        23        358              0.266292       1.183441       0.000000       0.259448   -9999.000000   -9999.000000   -9999.000000       0.313000
57196     57196     henan          114.8617       33.4611          106       179     2012      12        24        359              0.265381      -0.298431       0.000000       0.230375       0.101000       0.176500   -9999.000000       0.291000
57196     57196     henan          114.8617       33.4611          106       179     2012      12        25        360              0.265087       0.933380       0.000000       0.248021   -9999.000000   -9999.000000       0.058500       0.341000
57196     57196     henan          114.8617       33.4611          106       179     2012      12        26        361              0.000000       0.288940       0.000000       0.239318   -9999.000000   -9999.000000       0.099900       0.364000
57196     57196     henan          114.8617       33.4611          106       179     2012      12        27        362              0.268727      -0.155853       0.206367       0.227037   -9999.000000       0.102400       0.102100   -9999.000000
57196     57196     henan          114.8617       33.4611          106       179     2012      12        28        363              0.272500       0.325165       0.183917       0.241604   -9999.000000   -9999.000000       0.120100       0.567000
57196     57196     henan          114.8617       33.4611          106       179     2012      12        29        364              0.000000       1.099243       0.286818       0.263096   -9999.000000   -9999.000000   -9999.000000   -9999.000000
57196     57196     henan          114.8617       33.4611          106       179     2012      12        30        365              0.000000       0.047089       0.000000       0.241143   -9999.000000       0.086500   -9999.000000       0.352000
57196     57196     henan          114.8617       33.4611          106       179     2012      12        31        366              0.267533       0.409302       0.581488       0.236305       0.098000   -9999.000000       0.045100   -9999.000000
