# Supplementary material for: Research on Fusing Multisatellite Soil Moisture Data Based on Bayesian Model Averaging
Source: Hindawi journal article supplement (doi:10.1155/2018/9310838), 2018-06-25
Supplement: f1 [file 9310838.f1.zip › 2012_sm00-10cm_daily_ZDB_ZHY_57197_366days_allin.txt]

57197     57197     henan          114.3925       33.0847          108       178     2012      01        01        001              0.000000   -9999.000000       0.040674   -9999.000000   -9999.000000   -9999.000000       0.106800   -9999.000000
57197     57197     henan          114.3925       33.0847          108       178     2012      01        02        002              0.237042       0.861938       0.000000       0.284678   -9999.000000       0.077700       0.157100   -9999.000000
57197     57197     henan          114.3925       33.0847          108       178     2012      01        03        003              0.000000       2.011230       0.000000       0.305226   -9999.000000       0.070800   -9999.000000       0.126000
57197     57197     henan          114.3925       33.0847          108       178     2012      01        04        004              0.232833       1.204987       0.000000       0.280007   -9999.000000   -9999.000000   -9999.000000   -9999.000000
57197     57197     henan          114.3925       33.0847          108       178     2012      01        05        005              0.231458       0.361237       0.000000       0.255071   -9999.000000       0.060500       0.108200       0.098000
57197     57197     henan          114.3925       33.0847          108       178     2012      01        06        006              0.231417       0.695923       0.000000       0.258775   -9999.000000   -9999.000000       0.132700       0.117000
57197     57197     henan          114.3925       33.0847          108       178     2012      01        07        007              0.231667       1.291473       0.000000       0.269153   -9999.000000       0.035800       0.151500       0.301000
57197     57197     henan          114.3925       33.0847          108       178     2012      01        08        008              0.000000       1.666382       0.000000       0.289517   -9999.000000       0.078500       0.156000       0.116000
57197     57197     henan          114.3925       33.0847          108       178     2012      01        09        009              0.232125       2.388916       0.000000       0.291188   -9999.000000   -9999.000000   -9999.000000   -9999.000000
57197     57197     henan          114.3925       33.0847          108       178     2012      01        10        010              0.232000       2.809875       0.000000       0.304162   -9999.000000       0.063700       0.094900       0.241000
57197     57197     henan          114.3925       33.0847          108       178     2012      01        11        011              0.232000       1.753754       0.819264       0.297474   -9999.000000       0.132500       0.083800   -9999.000000
57197     57197     henan          114.3925       33.0847          108       178     2012      01        12        012              0.231208       1.713135       0.153106       0.285499   -9999.000000   -9999.000000       0.090100       0.375000
57197     57197     henan          114.3925       33.0847          108       178     2012      01        13        013              0.231000       0.993408       0.000000       0.278266   -9999.000000       0.233800       0.102000       0.154000
57197     57197     henan          114.3925       33.0847          108       178     2012      01        14        014              0.231333       1.186157       0.000000       0.288881   -9999.000000   -9999.000000   -9999.000000   -9999.000000
57197     57197     henan          114.3925       33.0847          108       178     2012      01        15        015              0.231792       1.626587       0.000000       0.303818   -9999.000000       0.091900   -9999.000000       0.207000
57197     57197     henan          114.3925       33.0847          108       178     2012      01        16        016              0.232000       3.378235       0.147281       0.318124   -9999.000000       0.097500       0.064000   -9999.000000
57197     57197     henan          114.3925       33.0847          108       178     2012      01        17        017              0.000000       2.783051       3.400249       0.321659   -9999.000000       0.083500       0.092900       0.733000
57197     57197     henan          114.3925       33.0847          108       178     2012      01        18        018              0.233600       2.970825       1.901788       0.331396   -9999.000000       0.199200       0.088700   -9999.000000
57197     57197     henan          114.3925       33.0847          108       178     2012      01        19        019              0.240158       2.531891       0.436424       0.342079   -9999.000000   -9999.000000       0.091800   -9999.000000
57197     57197     henan          114.3925       33.0847          108       178     2012      01        20        020              0.239583       2.988373       0.102296       0.339040   -9999.000000       0.150600   -9999.000000       0.555000
57197     57197     henan          114.3925       33.0847          108       178     2012      01        21        021              0.236333       2.506592       0.942996       0.323219   -9999.000000       0.103400   -9999.000000   -9999.000000
57197     57197     henan          114.3925       33.0847          108       178     2012      01        22        022              0.233250       0.093536       0.179645       0.264287   -9999.000000   -9999.000000       0.043100       0.158000
57197     57197     henan          114.3925       33.0847          108       178     2012      01        23        023              0.227348      -0.957184       1.426688       0.225443   -9999.000000       0.156500       0.106700   -9999.000000
57197     57197     henan          114.3925       33.0847          108       178     2012      01        24        024              0.227500       0.220978       0.000000       0.243753   -9999.000000   -9999.000000   -9999.000000   -9999.000000
57197     57197     henan          114.3925       33.0847          108       178     2012      01        25        025              0.223792       0.166107       0.000000       0.246005   -9999.000000   -9999.000000       0.121500       0.159000
57197     57197     henan          114.3925       33.0847          108       178     2012      01        26        026              0.225250       1.132996       0.000000       0.264792   -9999.000000   -9999.000000   -9999.000000   -9999.000000
57197     57197     henan          114.3925       33.0847          108       178     2012      01        27        027              0.226458       2.370605       0.663128       0.286507   -9999.000000   -9999.000000       0.116500       0.385000
57197     57197     henan          114.3925       33.0847          108       178     2012      01        28        028              0.227200       3.314270      42.100971       0.311974   -9999.000000       0.031600       0.130900   -9999.000000
57197     57197     henan          114.3925       33.0847          108       178     2012      01        29        029              0.000000       3.474274       0.061883       0.321070   -9999.000000   -9999.000000       0.127900       0.443000
57197     57197     henan          114.3925       33.0847          108       178     2012      01        30        030              0.228250       2.365723       0.000000       0.313461   -9999.000000   -9999.000000       0.139300       0.283000
57197     57197     henan          114.3925       33.0847          108       178     2012      01        31        031              0.227833       3.170715       0.000000       0.314959   -9999.000000       0.146700   -9999.000000   -9999.000000
57197     57197     henan          114.3925       33.0847          108       178     2012      02        01        032              0.226208       5.285980       0.000000       0.320699   -9999.000000   -9999.000000   -9999.000000       0.244000
57197     57197     henan          114.3925       33.0847          108       178     2012      02        02        033              0.224739       1.367554       0.000000       0.293463   -9999.000000       0.193500       0.086100   -9999.000000
57197     57197     henan          114.3925       33.0847          108       178     2012      02        03        034              0.224000       1.554047       0.000000       0.275006   -9999.000000       0.239100       0.123400       0.005000
57197     57197     henan          114.3925       33.0847          108       178     2012      02        04        035              0.222625       2.790924       0.000000       0.292500   -9999.000000       0.122400       0.125400       0.344000
57197     57197     henan          114.3925       33.0847          108       178     2012      02        05        036              0.225458       1.657898       0.234465       0.296849   -9999.000000       0.098200       0.130200       0.355000
57197     57197     henan          114.3925       33.0847          108       178     2012      02        06        037              0.225542       4.883179       0.000000       0.316409   -9999.000000   -9999.000000   -9999.000000       0.183000
57197     57197     henan          114.3925       33.0847          108       178     2012      02        07        038              0.222500       5.245636       0.000000       0.308222   -9999.000000       0.087100   -9999.000000   -9999.000000
57197     57197     henan          114.3925       33.0847          108       178     2012      02        08        039              0.220083       2.181702       0.000000       0.275338   -9999.000000       0.037200       0.103500       0.011000
57197     57197     henan          114.3925       33.0847          108       178     2012      02        09        040              0.218000       1.261810       0.149170       0.260551   -9999.000000   -9999.000000       0.131600   -9999.000000
57197     57197     henan          114.3925       33.0847          108       178     2012      02        10        041              0.218958       1.542023       0.000000       0.276313   -9999.000000       0.099200       0.132100       0.361000
57197     57197     henan          114.3925       33.0847          108       178     2012      02        11        042              0.218167       3.196594       0.000000       0.280664   -9999.000000   -9999.000000       0.138200       0.095000
57197     57197     henan          114.3925       33.0847          108       178     2012      02        12        043              0.216583       4.034393       0.000000       0.297160   -9999.000000       0.052100   -9999.000000   -9999.000000
57197     57197     henan          114.3925       33.0847          108       178     2012      02        13        044              0.216542       2.324799       0.000000       0.298321   -9999.000000       0.028600   -9999.000000       0.149000
57197     57197     henan          114.3925       33.0847          108       178     2012      02        14        045              0.216583       3.349701       0.100226       0.305323   -9999.000000   -9999.000000       0.137200   -9999.000000
57197     57197     henan          114.3925       33.0847          108       178     2012      02        15        046              0.216250       4.489868       0.049735       0.311435   -9999.000000       0.011200       0.138100       0.494000
57197     57197     henan          114.3925       33.0847          108       178     2012      02        16        047              0.215583       3.987793       0.655211       0.312300   -9999.000000       0.050900       0.139500   -9999.000000
57197     57197     henan          114.3925       33.0847          108       178     2012      02        17        048              0.214208       4.285278       0.000000       0.311019   -9999.000000   -9999.000000   -9999.000000   -9999.000000
57197     57197     henan          114.3925       33.0847          108       178     2012      02        18        049              0.212292       4.423462       0.000000       0.300848   -9999.000000       0.171000   -9999.000000       0.027000
57197     57197     henan          114.3925       33.0847          108       178     2012      02        19        050              0.210917       4.432892       0.000000       0.297984   -9999.000000   -9999.000000       0.096800   -9999.000000
57197     57197     henan          114.3925       33.0847          108       178     2012      02        20        051              0.210167       6.137970       0.000000       0.304125   -9999.000000       0.104500       0.103400       0.305000
57197     57197     henan          114.3925       33.0847          108       178     2012      02        21        052              0.210583       5.861481       2.240602       0.306071   -9999.000000       0.103200   -9999.000000   -9999.000000
57197     57197     henan          114.3925       33.0847          108       178     2012      02        22        053              0.208250       9.481720       0.000000       0.303730       0.115000       0.159100       0.101900   -9999.000000
57197     57197     henan          114.3925       33.0847          108       178     2012      02        23        054              0.203625       9.100006       0.127704       0.303328       0.129000       0.198600   -9999.000000       0.237000
57197     57197     henan          114.3925       33.0847          108       178     2012      02        24        055              0.201500       5.535767       0.000000       0.303290   -9999.000000   -9999.000000   -9999.000000   -9999.000000
57197     57197     henan          114.3925       33.0847          108       178     2012      02        25        056              0.198833       4.415863       0.000000       0.302873   -9999.000000       0.026900       0.088000       0.204000
57197     57197     henan          114.3925       33.0847          108       178     2012      02        26        057              0.196458       4.547546       1.197180       0.300363   -9999.000000       0.246200       0.098500   -9999.000000
57197     57197     henan          114.3925       33.0847          108       178     2012      02        27        058              0.194167       5.118225       0.548719       0.292179   -9999.000000   -9999.000000   -9999.000000       0.148000
57197     57197     henan          114.3925       33.0847          108       178     2012      02        28        059              0.193542       4.741394       0.000000       0.292897       0.089000       0.021900       0.069500       0.194000
57197     57197     henan          114.3925       33.0847          108       178     2012      02        29        060              0.000000   -9999.000000       0.101282   -9999.000000   -9999.000000   -9999.000000   -9999.000000   -9999.000000
57197     57197     henan          114.3925       33.0847          108       178     2012      03        01        061              0.191000       6.573883       0.679999       0.295081   -9999.000000       0.121800       0.075100       0.397000
57197     57197     henan          114.3925       33.0847          108       178     2012      03        02        062              0.191000       5.141998       0.000000       0.302103   -9999.000000       0.055500       0.077400   -9999.000000
57197     57197     henan          114.3925       33.0847          108       178     2012      03        03        063              0.189125       4.969116       1.130551       0.302668       0.180000   -9999.000000       0.076500       0.097000
57197     57197     henan          114.3925       33.0847          108       178     2012      03        04        064              0.187833       4.120026       0.175919       0.302410       0.188000       0.006700       0.081500       0.236000
57197     57197     henan          114.3925       33.0847          108       178     2012      03        05        065              0.188500       4.155426       0.000000       0.302206       0.147000       0.099600   -9999.000000   -9999.000000
57197     57197     henan          114.3925       33.0847          108       178     2012      03        06        066              0.188542       6.608154       0.143931       0.300671       0.117000       0.030700   -9999.000000       0.127000
57197     57197     henan          114.3925       33.0847          108       178     2012      03        07        067              0.000000       8.421814       0.054790       0.296672       0.139000       0.044800       0.073200   -9999.000000
57197     57197     henan          114.3925       33.0847          108       178     2012      03        08        068              0.186333       9.465454       0.260054       0.293789   -9999.000000   -9999.000000       0.094400       0.019000
57197     57197     henan          114.3925       33.0847          108       178     2012      03        09        069              0.184292       7.826477       0.048831       0.293277   -9999.000000   -9999.000000       0.089900   -9999.000000
57197     57197     henan          114.3925       33.0847          108       178     2012      03        10        070              0.183875       7.491791       0.000000       0.291438       0.104000       0.027800       0.092500       0.217000
57197     57197     henan          114.3925       33.0847          108       178     2012      03        11        071              0.181292      10.421387       0.000000       0.287924   -9999.000000   -9999.000000   -9999.000000   -9999.000000
57197     57197     henan          114.3925       33.0847          108       178     2012      03        12        072              0.179917       6.970428       0.000000       0.284977       0.143000       0.111600       0.118700   -9999.000000
57197     57197     henan          114.3925       33.0847          108       178     2012      03        13        073              0.180208       8.519562       0.085806       0.283282   -9999.000000   -9999.000000       0.106000       0.065000
57197     57197     henan          114.3925       33.0847          108       178     2012      03        14        074              0.180792      12.065308       0.200163       0.279911       0.155000       0.054500       0.113600   -9999.000000
57197     57197     henan          114.3925       33.0847          108       178     2012      03        15        075              0.178500      13.574768       1.869617       0.277016       0.201500       0.044300       0.145700       0.420000
57197     57197     henan          114.3925       33.0847          108       178     2012      03        16        076              0.191167       8.834442       2.892848       0.291573       0.129000   -9999.000000       0.117100   -9999.000000
57197     57197     henan          114.3925       33.0847          108       178     2012      03        17        077              0.207458      11.746979       1.214756       0.287374       0.122000       0.014100   -9999.000000   -9999.000000
57197     57197     henan          114.3925       33.0847          108       178     2012      03        18        078              0.207000      13.620575       0.000000       0.281936   -9999.000000   -9999.000000       0.112900       0.060000
57197     57197     henan          114.3925       33.0847          108       178     2012      03        19        079              0.205000       9.395905       1.131742       0.282174       0.182000       0.113300       0.138100   -9999.000000
57197     57197     henan          114.3925       33.0847          108       178     2012      03        20        080              0.204958       5.321503       0.136621       0.290463   -9999.000000       0.034700       0.126400       0.045000
57197     57197     henan          114.3925       33.0847          108       178     2012      03        21        081              0.226500       6.818390      48.720726       0.287224       0.269500   -9999.000000       0.078000   -9999.000000
57197     57197     henan          114.3925       33.0847          108       178     2012      03        22        082              0.238417       7.215576       1.816706       0.375448   -9999.000000       0.032900   -9999.000000   -9999.000000
57197     57197     henan          114.3925       33.0847          108       178     2012      03        23        083              0.232583       6.322510       2.273641       0.385666       0.236000   -9999.000000   -9999.000000       0.170000
57197     57197     henan          114.3925       33.0847          108       178     2012      03        24        084              0.228708       9.690247       1.565937       0.370017   -9999.000000       0.057300   -9999.000000   -9999.000000
57197     57197     henan          114.3925       33.0847          108       178     2012      03        25        085              0.000000      12.604218       0.000000       0.361477       0.222000       0.058400       0.137900       0.073000
57197     57197     henan          114.3925       33.0847          108       178     2012      03        26        086              0.223667      14.690643       1.606179       0.351579       0.180000   -9999.000000       0.173600   -9999.000000
57197     57197     henan          114.3925       33.0847          108       178     2012      03        27        087              0.221250      16.337555       3.109374       0.344411       0.148000       0.125400       0.180800       0.131000
57197     57197     henan          114.3925       33.0847          108       178     2012      03        28        088              0.217526      17.979370       0.161097       0.337754       0.167000       0.151900   -9999.000000       0.041000
57197     57197     henan          114.3925       33.0847          108       178     2012      03        29        089              0.214000      18.494598       0.597950       0.330810   -9999.000000       0.169600       0.173000   -9999.000000
57197     57197     henan          114.3925       33.0847          108       178     2012      03        30        090              0.211929      16.518707       2.506610       0.330274       0.237000       0.185100       0.172500       0.059000
57197     57197     henan          114.3925       33.0847          108       178     2012      03        31        091              0.208125      13.543549       4.572750       0.338243       0.183000   -9999.000000       0.179600   -9999.000000
57197     57197     henan          114.3925       33.0847          108       178     2012      04        01        092              0.203958      16.100433       0.000000       0.326184       0.183500       0.052200       0.176400       0.024000
57197     57197     henan          114.3925       33.0847          108       178     2012      04        02        093              0.199792      17.675323       0.255298       0.318342       0.162000       0.142600   -9999.000000   -9999.000000
57197     57197     henan          114.3925       33.0847          108       178     2012      04        03        094              0.196833      12.749786       0.000000       0.315974   -9999.000000       0.150300   -9999.000000   -9999.000000
57197     57197     henan          114.3925       33.0847          108       178     2012      04        04        095              0.193625      15.180908       0.000000       0.310631       0.230000       0.079800       0.147100   -9999.000000
57197     57197     henan          114.3925       33.0847          108       178     2012      04        05        096              0.192292      16.427521       0.498385       0.306725       0.206500   -9999.000000       0.167200   -9999.000000
57197     57197     henan          114.3925       33.0847          108       178     2012      04        06        097              0.190208      17.551208       0.954158       0.300472       0.185000       0.285000       0.153200   -9999.000000
57197     57197     henan          114.3925       33.0847          108       178     2012      04        07        098              0.188542      18.791656       1.896049       0.293538       0.148000       0.047000       0.152300   -9999.000000
57197     57197     henan          114.3925       33.0847          108       178     2012      04        08        099              0.187167      19.444366       1.010201       0.287589   -9999.000000   -9999.000000   -9999.000000   -9999.000000
57197     57197     henan          114.3925       33.0847          108       178     2012      04        09        100              0.184083      20.994843       1.807931       0.280616       0.220000       0.054500   -9999.000000   -9999.000000
57197     57197     henan          114.3925       33.0847          108       178     2012      04        10        101              0.183000      18.533203       4.397784       0.282162       0.184000       0.234900       0.139000   -9999.000000
57197     57197     henan          114.3925       33.0847          108       178     2012      04        11        102              0.181125      19.279266       0.134670       0.280911       0.227500   -9999.000000       0.169200   -9999.000000
57197     57197     henan          114.3925       33.0847          108       178     2012      04        12        103              0.176333      19.390594       1.453224       0.276465       0.244000   -9999.000000       0.152700   -9999.000000
57197     57197     henan          114.3925       33.0847          108       178     2012      04        13        104              0.175542      13.529541       0.844968       0.285773       0.196000   -9999.000000       0.159400   -9999.000000
57197     57197     henan          114.3925       33.0847          108       178     2012      04        14        105              0.173417      18.373566       0.113396       0.279534       0.277000       0.016600   -9999.000000   -9999.000000
57197     57197     henan          114.3925       33.0847          108       178     2012      04        15        106              0.171875      16.761200       0.068277       0.276231       0.283000   -9999.000000       0.171700   -9999.000000
57197     57197     henan          114.3925       33.0847          108       178     2012      04        16        107              0.170083      18.071930       0.239763       0.270925       0.200000   -9999.000000       0.175000   -9999.000000
57197     57197     henan          114.3925       33.0847          108       178     2012      04        17        108              0.169750      19.653809       1.594739       0.265808       0.208500       0.210000       0.162700   -9999.000000
57197     57197     henan          114.3925       33.0847          108       178     2012      04        18        109              0.167250      21.135803       2.082378       0.258176       0.211000   -9999.000000   -9999.000000   -9999.000000
57197     57197     henan          114.3925       33.0847          108       178     2012      04        19        110              0.166917      19.403809       0.288478       0.257028   -9999.000000   -9999.000000   -9999.000000   -9999.000000
57197     57197     henan          114.3925       33.0847          108       178     2012      04        20        111              0.163458      21.969238       3.121789       0.249954       0.273000       0.056800   -9999.000000   -9999.000000
57197     57197     henan          114.3925       33.0847          108       178     2012      04        21        112              0.163042      16.925415       1.180987       0.277888       0.215500       0.070800       0.148900   -9999.000000
57197     57197     henan          114.3925       33.0847          108       178     2012      04        22        113              0.161583      21.125397       0.230005       0.263773       0.191000       0.033700       0.183700   -9999.000000
57197     57197     henan          114.3925       33.0847          108       178     2012      04        23        114              0.164292      23.863037      33.256786       0.251117       0.174000   -9999.000000       0.169100       0.305000
57197     57197     henan          114.3925       33.0847          108       178     2012      04        24        115              0.222458      25.559509       1.338721       0.314959   -9999.000000       0.221500       0.228200   -9999.000000
57197     57197     henan          114.3925       33.0847          108       178     2012      04        25        116              0.000000      19.900482       0.278027       0.357109       0.273000       0.148500   -9999.000000       0.194000
57197     57197     henan          114.3925       33.0847          108       178     2012      04        26        117              0.218333      18.789093       0.161328       0.338006       0.210000   -9999.000000   -9999.000000       0.002000
57197     57197     henan          114.3925       33.0847          108       178     2012      04        27        118              0.211958      20.547241       0.308173       0.323344       0.185000       0.112600   -9999.000000   -9999.000000
57197     57197     henan          114.3925       33.0847          108       178     2012      04        28        119              0.205522      23.593140       2.670459       0.313142       0.147000   -9999.000000       0.202900       0.008000
57197     57197     henan          114.3925       33.0847          108       178     2012      04        29        120              0.199208      23.601501       0.148438       0.316050   -9999.000000   -9999.000000       0.185100   -9999.000000
57197     57197     henan          114.3925       33.0847          108       178     2012      04        30        121              0.194292      22.248291       1.656250       0.309785       0.249000       0.224200       0.173100       0.065000
57197     57197     henan          114.3925       33.0847          108       178     2012      05        01        122              0.191250      20.421600       1.364554       0.314524       0.209000   -9999.000000   -9999.000000   -9999.000000
57197     57197     henan          114.3925       33.0847          108       178     2012      05        02        123              0.187958      20.808624       0.697530       0.310058       0.204500       0.193200       0.166900   -9999.000000
57197     57197     henan          114.3925       33.0847          108       178     2012      05        03        124              0.183125      23.899780       0.716085       0.299167       0.198500       0.334800       0.165800       0.067000
57197     57197     henan          114.3925       33.0847          108       178     2012      05        04        125              0.178167      24.723511       0.000000       0.293905       0.152000   -9999.000000       0.176800   -9999.000000
57197     57197     henan          114.3925       33.0847          108       178     2012      05        05        126              0.171400      25.935028       0.000000       0.281177       0.238000   -9999.000000       0.171300       0.021000
57197     57197     henan          114.3925       33.0847          108       178     2012      05        06        127              0.166250      27.167023       0.000000       0.267830       0.221000   -9999.000000   -9999.000000   -9999.000000
57197     57197     henan          114.3925       33.0847          108       178     2012      05        07        128              0.161583      28.271881       2.167987       0.254304   -9999.000000   -9999.000000   -9999.000000       0.150000
57197     57197     henan          114.3925       33.0847          108       178     2012      05        08        129              0.159167      24.511932       1.764796       0.278217       0.207500       0.020700       0.107200       0.160000
57197     57197     henan          114.3925       33.0847          108       178     2012      05        09        130              0.157583      24.385376       4.510970       0.271612       0.189000       0.093900       0.127800   -9999.000000
57197     57197     henan          114.3925       33.0847          108       178     2012      05        10        131              0.154333      27.150696       0.000000       0.258320   -9999.000000       0.025300       0.122000       0.119000
57197     57197     henan          114.3925       33.0847          108       178     2012      05        11        132              0.150833      27.012115       0.505829       0.243314       0.153000   -9999.000000       0.126300   -9999.000000
57197     57197     henan          114.3925       33.0847          108       178     2012      05        12        133              0.146458      27.831940       1.607652       0.231818       0.189000       0.070300   -9999.000000       0.325000
57197     57197     henan          114.3925       33.0847          108       178     2012      05        13        134              0.144500      22.563385       0.291418       0.251582       0.116000       0.095700   -9999.000000   -9999.000000
57197     57197     henan          114.3925       33.0847          108       178     2012      05        14        135              0.142292      23.372559       0.404529       0.248139       0.128000   -9999.000000       0.146900   -9999.000000
57197     57197     henan          114.3925       33.0847          108       178     2012      05        15        136              0.141125      23.166443       0.000000       0.241612   -9999.000000       0.040500       0.175200       0.214000
57197     57197     henan          114.3925       33.0847          108       178     2012      05        16        137              0.139167      25.857635       1.155455       0.225751       0.183000   -9999.000000       0.151200   -9999.000000
57197     57197     henan          114.3925       33.0847          108       178     2012      05        17        138              0.136958      27.436859       0.000000       0.213325       0.140500   -9999.000000       0.165900       0.307000
57197     57197     henan          114.3925       33.0847          108       178     2012      05        18        139              0.133625      29.319763       0.087107       0.201843       0.145000       0.186000   -9999.000000   -9999.000000
57197     57197     henan          114.3925       33.0847          108       178     2012      05        19        140              0.132375      27.908234       0.000000       0.196740       0.115000   -9999.000000       0.154900   -9999.000000
57197     57197     henan          114.3925       33.0847          108       178     2012      05        20        141              0.130417      29.092438       0.000000       0.190626       0.138000       0.258300       0.171800       0.316000
57197     57197     henan          114.3925       33.0847          108       178     2012      05        21        142              0.128458      27.903473       0.000000       0.186975       0.112000   -9999.000000       0.114800   -9999.000000
57197     57197     henan          114.3925       33.0847          108       178     2012      05        22        143              0.125792      27.617401       0.248923       0.185142       0.120000       0.106200       0.104000       0.362000
57197     57197     henan          114.3925       33.0847          108       178     2012      05        23        144              0.124583      25.922089       1.782467       0.185381   -9999.000000       0.230600   -9999.000000   -9999.000000
57197     57197     henan          114.3925       33.0847          108       178     2012      05        24        145              0.123500      26.334442       0.000000       0.185731       0.076000   -9999.000000   -9999.000000       0.198000
57197     57197     henan          114.3925       33.0847          108       178     2012      05        25        146              0.000000      26.110199       0.291545       0.185411   -9999.000000   -9999.000000       0.089000       0.467000
57197     57197     henan          114.3925       33.0847          108       178     2012      05        26        147              0.124667      25.101715       4.828613       0.186892   -9999.000000       0.024100       0.112000   -9999.000000
57197     57197     henan          114.3925       33.0847          108       178     2012      05        27        148              0.121792      29.702209       0.101760       0.180297       0.114000       0.047800       0.113000       0.195000
57197     57197     henan          114.3925       33.0847          108       178     2012      05        28        149              0.122833      27.285645       0.000000       0.181679       0.080500       0.175000       0.119500   -9999.000000
57197     57197     henan          114.3925       33.0847          108       178     2012      05        29        150              0.118625      29.992920       3.834736       0.177000       0.142000   -9999.000000   -9999.000000       0.509000
57197     57197     henan          114.3925       33.0847          108       178     2012      05        30        151              0.121292      22.373901       0.000000       0.223723       0.118000   -9999.000000   -9999.000000   -9999.000000
57197     57197     henan          114.3925       33.0847          108       178     2012      05        31        152              0.122792      27.148773       0.182062       0.210439   -9999.000000       0.104000   -9999.000000   -9999.000000
57197     57197     henan          114.3925       33.0847          108       178     2012      06        01        153              0.122333      27.142273       0.059402       0.195417       0.080000   -9999.000000       0.120500       0.245000
57197     57197     henan          114.3925       33.0847          108       178     2012      06        02        154              0.125792      24.492157       1.292637       0.191785       0.073500       0.086600       0.135100   -9999.000000
57197     57197     henan          114.3925       33.0847          108       178     2012      06        03        155              0.124667      28.839844       0.231020       0.184175       0.077000   -9999.000000       0.140200       0.227000
57197     57197     henan          114.3925       33.0847          108       178     2012      06        04        156              0.124435      27.132263       0.000000       0.181734       0.067000   -9999.000000   -9999.000000   -9999.000000
57197     57197     henan          114.3925       33.0847          108       178     2012      06        05        157              0.123500      29.838501       2.619524       0.179142   -9999.000000       0.089800       0.054700       0.367000
57197     57197     henan          114.3925       33.0847          108       178     2012      06        06        158              0.121667      29.480042       1.224749       0.201332       0.102000   -9999.000000       0.063300       0.391000
57197     57197     henan          114.3925       33.0847          108       178     2012      06        07        159              0.123083      24.909760       1.820094       0.226828       0.079000       0.134500       0.060600   -9999.000000
57197     57197     henan          114.3925       33.0847          108       178     2012      06        08        160              0.125292      28.719818       0.000000       0.207676       0.082500   -9999.000000       0.068500       0.359000
57197     57197     henan          114.3925       33.0847          108       178     2012      06        09        161              0.125750      32.166443       0.000000       0.188327       0.066000       0.157500   -9999.000000   -9999.000000
57197     57197     henan          114.3925       33.0847          108       178     2012      06        10        162              0.124000      35.010315       3.796785       0.179936       0.080000       0.262800   -9999.000000       0.538000
57197     57197     henan          114.3925       33.0847          108       178     2012      06        11        163              0.000000      33.215210       0.000000       0.210743       0.075000   -9999.000000       0.042800   -9999.000000
57197     57197     henan          114.3925       33.0847          108       178     2012      06        12        164              0.146542      29.551636       0.000000       0.204123       0.089000       0.112200       0.060600   -9999.000000
57197     57197     henan          114.3925       33.0847          108       178     2012      06        13        165              0.151458      33.056427       0.000000       0.186907       0.069500       0.188600       0.065000       0.411000
57197     57197     henan          114.3925       33.0847          108       178     2012      06        14        166              0.150125      35.187653       1.939673       0.180020       0.073500       0.278700       0.068600   -9999.000000
57197     57197     henan          114.3925       33.0847          108       178     2012      06        15        167              0.157250      30.912842       1.331296       0.180348       0.068000       0.142500   -9999.000000       0.296000
57197     57197     henan          114.3925       33.0847          108       178     2012      06        16        168              0.209167      32.702789       0.813582       0.177741   -9999.000000   -9999.000000       0.062900   -9999.000000
57197     57197     henan          114.3925       33.0847          108       178     2012      06        17        169              0.210957      33.031464       0.000000       0.176399       0.088000       0.301600       0.056600   -9999.000000
57197     57197     henan          114.3925       33.0847          108       178     2012      06        18        170              0.217000      29.908752       0.000000       0.178586       0.081500       0.058700       0.049800       0.352000
57197     57197     henan          114.3925       33.0847          108       178     2012      06        19        171              0.221500      33.192291       0.000000       0.176715       0.074000   -9999.000000       0.057200   -9999.000000
57197     57197     henan          114.3925       33.0847          108       178     2012      06        20        172              0.224083      33.698853       0.537051       0.176069       0.070000       0.081900       0.054000       0.297000
57197     57197     henan          114.3925       33.0847          108       178     2012      06        21        173              0.225333      33.705200       0.358612       0.175472   -9999.000000   -9999.000000   -9999.000000   -9999.000000
57197     57197     henan          114.3925       33.0847          108       178     2012      06        22        174              0.227000      33.747375       0.000000       0.176007       0.098000       0.159400       0.045300       0.377000
57197     57197     henan          114.3925       33.0847          108       178     2012      06        23        175              0.227625      35.814270       0.000000       0.174965       0.086500   -9999.000000       0.050700       0.354000
57197     57197     henan          114.3925       33.0847          108       178     2012      06        24        176              0.230250      35.232727       0.000000       0.174766       0.081500   -9999.000000       0.051100   -9999.000000
57197     57197     henan          114.3925       33.0847          108       178     2012      06        25        177              0.230375      35.718140       0.504334       0.174646       0.067000       0.115400       0.039400       0.326000
57197     57197     henan          114.3925       33.0847          108       178     2012      06        26        178              0.228818      35.054382       0.000000       0.175025   -9999.000000   -9999.000000   -9999.000000   -9999.000000
57197     57197     henan          114.3925       33.0847          108       178     2012      06        27        179              0.223417      33.067169       0.574620       0.175940       0.130000   -9999.000000   -9999.000000       0.647000
57197     57197     henan          114.3925       33.0847          108       178     2012      06        28        180              0.231917      27.542755      11.146849       0.182987       0.152000       0.308800       0.045500       0.982000
57197     57197     henan          114.3925       33.0847          108       178     2012      06        29        181              0.242667      27.211853       6.336632       0.270931       0.133500   -9999.000000       0.040000       0.728000
57197     57197     henan          114.3925       33.0847          108       178     2012      06        30        182              0.265875      28.853455      17.647860       0.275977   -9999.000000       0.254300       0.047200   -9999.000000
57197     57197     henan          114.3925       33.0847          108       178     2012      07        01        183              0.265417      25.091675       5.870825       0.356056   -9999.000000       0.181900       0.067900   -9999.000000
57197     57197     henan          114.3925       33.0847          108       178     2012      07        02        184              0.267125      26.251038      14.946220       0.345768       0.214000       0.232300   -9999.000000       0.983000
57197     57197     henan          114.3925       33.0847          108       178     2012      07        03        185              0.261625      26.389252       1.127406       0.375745       0.221000       0.340800       0.062800   -9999.000000
57197     57197     henan          114.3925       33.0847          108       178     2012      07        04        186              0.265875      29.667572      21.265915       0.356733       0.177000   -9999.000000       0.059300       0.811000
57197     57197     henan          114.3925       33.0847          108       178     2012      07        05        187              0.266042      29.245911      15.147542       0.374499       0.195000       0.186200       0.066500       0.906000
57197     57197     henan          114.3925       33.0847          108       178     2012      07        06        188              0.260875      25.896820       0.749282       0.391494   -9999.000000       0.081700       0.071600   -9999.000000
57197     57197     henan          114.3925       33.0847          108       178     2012      07        07        189              0.257458      29.293945       1.172487       0.367277   -9999.000000   -9999.000000   -9999.000000       0.750000
57197     57197     henan          114.3925       33.0847          108       178     2012      07        08        190              0.255833      30.500092       0.000000       0.357542       0.167000       0.101900   -9999.000000   -9999.000000
57197     57197     henan          114.3925       33.0847          108       178     2012      07        09        191              0.252000      31.828674       1.668992       0.342908       0.154000   -9999.000000       0.061200       0.802000
57197     57197     henan          114.3925       33.0847          108       178     2012      07        10        192              0.245667      31.677917       0.374079       0.335287       0.142000       0.107200       0.072800   -9999.000000
57197     57197     henan          114.3925       33.0847          108       178     2012      07        11        193              0.242875      29.498901       0.000000       0.332312       0.129000   -9999.000000       0.058600   -9999.000000
57197     57197     henan          114.3925       33.0847          108       178     2012      07        12        194              0.234000      33.370575       1.116337       0.315768   -9999.000000   -9999.000000       0.057100       0.664000
57197     57197     henan          114.3925       33.0847          108       178     2012      07        13        195              0.226875      30.775513       2.804290       0.309088   -9999.000000       0.110800   -9999.000000   -9999.000000
57197     57197     henan          114.3925       33.0847          108       178     2012      07        14        196              0.220792      28.902039       0.180276       0.312845       0.183500       0.191900   -9999.000000       0.831000
57197     57197     henan          114.3925       33.0847          108       178     2012      07        15        197              0.214083      27.842560       9.570601       0.312630       0.165500       0.170800       0.051600   -9999.000000
57197     57197     henan          114.3925       33.0847          108       178     2012      07        16        198              0.203625      29.098083       1.884019       0.317570       0.146000       0.221600       0.078600   -9999.000000
57197     57197     henan          114.3925       33.0847          108       178     2012      07        17        199              0.192833      29.203003       0.000000       0.332393       0.123000   -9999.000000       0.065500       0.724000
57197     57197     henan          114.3925       33.0847          108       178     2012      07        18        200              0.183625      29.792389       0.000000       0.314241   -9999.000000       0.068100       0.064000   -9999.000000
57197     57197     henan          114.3925       33.0847          108       178     2012      07        19        201              0.174652      30.299103       0.000000       0.300955       0.172000       0.154400   -9999.000000       0.705000
57197     57197     henan          114.3925       33.0847          108       178     2012      07        20        202              0.167958      30.826050       0.000000       0.288007       0.151000       0.138700       0.068800   -9999.000000
57197     57197     henan          114.3925       33.0847          108       178     2012      07        21        203              0.160958      32.180176       0.000000       0.276952       0.208500       0.034700       0.067400       0.572000
57197     57197     henan          114.3925       33.0847          108       178     2012      07        22        204              0.154042      33.852142       0.000000       0.261287       0.212000   -9999.000000       0.069400       0.664000
57197     57197     henan          114.3925       33.0847          108       178     2012      07        23        205              0.150500      32.064972       0.000000       0.249349   -9999.000000   -9999.000000       0.096200   -9999.000000
57197     57197     henan          114.3925       33.0847          108       178     2012      07        24        206              0.147583      33.351807       3.771509       0.233313       0.274000       0.030200   -9999.000000       0.813000
57197     57197     henan          114.3925       33.0847          108       178     2012      07        25        207              0.146792      33.198334       2.123961       0.251377       0.223500   -9999.000000   -9999.000000   -9999.000000
57197     57197     henan          114.3925       33.0847          108       178     2012      07        26        208              0.145917      34.350372       8.802306       0.248330       0.222500       0.113200       0.086600       0.630000
57197     57197     henan          114.3925       33.0847          108       178     2012      07        27        209              0.143375      34.785828       9.363029       0.256188       0.173000   -9999.000000       0.106800       0.669000
57197     57197     henan          114.3925       33.0847          108       178     2012      07        28        210              0.140333      34.027008       5.232429       0.277419       0.182000       0.088700       0.090400       0.648000
57197     57197     henan          114.3925       33.0847          108       178     2012      07        29        211              0.137875      34.142334       2.459362       0.273671       0.236000   -9999.000000       0.090600       0.527000
57197     57197     henan          114.3925       33.0847          108       178     2012      07        30        212              0.135292      34.924500       0.000000       0.254516       0.252000   -9999.000000   -9999.000000   -9999.000000
57197     57197     henan          114.3925       33.0847          108       178     2012      07        31        213              0.132292      35.685120       8.183536       0.242389       0.196500       0.132000   -9999.000000       0.637000
57197     57197     henan          114.3925       33.0847          108       178     2012      08        01        214              0.240292      34.858917       0.000000       0.233646       0.264500   -9999.000000       0.064100   -9999.000000
57197     57197     henan          114.3925       33.0847          108       178     2012      08        02        215              0.265917      31.520874       0.000000       0.229439       0.182000       0.056400       0.079200       0.649000
57197     57197     henan          114.3925       33.0847          108       178     2012      08        03        216              0.261500      31.482727       0.909734       0.225253   -9999.000000   -9999.000000       0.069400       0.518000
57197     57197     henan          114.3925       33.0847          108       178     2012      08        04        217              0.267333      30.949219       8.251246       0.223597       0.355000   -9999.000000       0.084900   -9999.000000
57197     57197     henan          114.3925       33.0847          108       178     2012      08        05        218              0.264750      28.405029       0.000000       0.299893       0.317000   -9999.000000   -9999.000000       0.671000
57197     57197     henan          114.3925       33.0847          108       178     2012      08        06        219              0.259292      30.118164       0.000000       0.275143       0.285500       0.032300       0.071400   -9999.000000
57197     57197     henan          114.3925       33.0847          108       178     2012      08        07        220              0.250083      31.404480       0.257414       0.253674       0.217000   -9999.000000   -9999.000000       0.611000
57197     57197     henan          114.3925       33.0847          108       178     2012      08        08        221              0.234417      31.745514       0.000000       0.237438   -9999.000000       0.209600       0.068900   -9999.000000
57197     57197     henan          114.3925       33.0847          108       178     2012      08        09        222              0.212250      32.496307       7.225739       0.225619       0.365000   -9999.000000       0.071600   -9999.000000
57197     57197     henan          114.3925       33.0847          108       178     2012      08        10        223              0.207348      31.506775       4.041577       0.264119       0.315500       0.092100   -9999.000000       0.748000
57197     57197     henan          114.3925       33.0847          108       178     2012      08        11        224              0.216167      29.492554       0.000000       0.285519       0.282500       0.078100   -9999.000000   -9999.000000
57197     57197     henan          114.3925       33.0847          108       178     2012      08        12        225              0.211708      30.630188       0.000000       0.277780       0.248500       0.063600       0.052300       0.646000
57197     57197     henan          114.3925       33.0847          108       178     2012      08        13        226              0.205667      31.222656       0.338016       0.255207       0.278000       0.087300       0.098900   -9999.000000
57197     57197     henan          114.3925       33.0847          108       178     2012      08        14        227              0.202625      26.891449       7.401266       0.246288   -9999.000000   -9999.000000       0.088600   -9999.000000
57197     57197     henan          114.3925       33.0847          108       178     2012      08        15        228              0.208750      27.435028       0.741318       0.255860       0.336000       0.232500       0.088700       0.743000
57197     57197     henan          114.3925       33.0847          108       178     2012      08        16        229              0.204417      28.114197       0.000000       0.294356       0.270000       0.104800   -9999.000000   -9999.000000
57197     57197     henan          114.3925       33.0847          108       178     2012      08        17        230              0.198583      28.889801       0.000000       0.266534       0.268500   -9999.000000       0.094300       0.664000
57197     57197     henan          114.3925       33.0847          108       178     2012      08        18        231              0.191000      30.762787       1.297261       0.252458       0.206000       0.024700       0.080800   -9999.000000
57197     57197     henan          114.3925       33.0847          108       178     2012      08        19        232              0.175750      32.073578       0.447625       0.245444   -9999.000000       0.023700       0.091400       0.631000
57197     57197     henan          114.3925       33.0847          108       178     2012      08        20        233              0.187167      31.982941      78.059265       0.231651   -9999.000000       0.140800       0.131100       0.765000
57197     57197     henan          114.3925       33.0847          108       178     2012      08        21        234              0.263125      28.558899       6.491289       0.361986       0.264000       0.216500       0.128000   -9999.000000
57197     57197     henan          114.3925       33.0847          108       178     2012      08        22        235              0.256417      25.144409       0.000000       0.429633       0.187000   -9999.000000   -9999.000000   -9999.000000
57197     57197     henan          114.3925       33.0847          108       178     2012      08        23        236              0.247708      23.247803       0.000000       0.367443       0.174000       0.035000       0.121900   -9999.000000
57197     57197     henan          114.3925       33.0847          108       178     2012      08        24        237              0.238417      24.644135       0.000000       0.350878       0.170000       0.237100       0.130900       0.707000
57197     57197     henan          114.3925       33.0847          108       178     2012      08        25        238              0.000000      25.639740       3.393255       0.339560   -9999.000000       0.208800       0.109000       0.701000
57197     57197     henan          114.3925       33.0847          108       178     2012      08        26        239              0.262542      27.290466      51.805614       0.335676   -9999.000000       0.135700       0.124600       0.892000
57197     57197     henan          114.3925       33.0847          108       178     2012      08        27        240              0.274208      24.883606      11.351735       0.413011       0.269000   -9999.000000   -9999.000000       0.822000
57197     57197     henan          114.3925       33.0847          108       178     2012      08        28        241              0.263792      25.389313       0.000000       0.405283       0.257500   -9999.000000   -9999.000000   -9999.000000
57197     57197     henan          114.3925       33.0847          108       178     2012      08        29        242              0.259917      27.339752       0.164021       0.379145       0.189000       0.119100       0.089400       0.755000
57197     57197     henan          114.3925       33.0847          108       178     2012      08        30        243              0.253917      29.366882       0.000000       0.365658   -9999.000000       0.180200       0.106200   -9999.000000
57197     57197     henan          114.3925       33.0847          108       178     2012      08        31        244              0.248708      29.321198       0.052819       0.356490       0.261000       0.196300       0.094000       0.782000
57197     57197     henan          114.3925       33.0847          108       178     2012      09        01        245              0.239208      29.189270       0.088385       0.350969       0.226500   -9999.000000       0.102100       0.722000
57197     57197     henan          114.3925       33.0847          108       178     2012      09        02        246              0.225375      29.687225       1.910716       0.342838       0.210500       0.064700   -9999.000000   -9999.000000
57197     57197     henan          114.3925       33.0847          108       178     2012      09        03        247              0.206500      24.927704       1.924588       0.338495       0.141000       0.116900       0.130800       0.689000
57197     57197     henan          114.3925       33.0847          108       178     2012      09        04        248              0.186583      26.398743       0.239477       0.329859   -9999.000000   -9999.000000       0.115800   -9999.000000
57197     57197     henan          114.3925       33.0847          108       178     2012      09        05        249              0.171125      25.839874       0.000000       0.320681       0.227000       0.176100       0.122100       0.654000
57197     57197     henan          114.3925       33.0847          108       178     2012      09        06        250              0.162542      26.220856       0.107580       0.312500       0.225000   -9999.000000       0.113700   -9999.000000
57197     57197     henan          114.3925       33.0847          108       178     2012      09        07        251              0.158958      26.720612      18.016552       0.307998       0.182000   -9999.000000   -9999.000000   -9999.000000
57197     57197     henan          114.3925       33.0847          108       178     2012      09        08        252              0.261208      27.968201      17.647894       0.325027       0.288500       0.192600   -9999.000000       0.948000
57197     57197     henan          114.3925       33.0847          108       178     2012      09        09        253              0.259375      23.207184       0.000000       0.393432       0.193000   -9999.000000       0.113600   -9999.000000
57197     57197     henan          114.3925       33.0847          108       178     2012      09        10        254              0.255167      24.277283       0.274084       0.366038   -9999.000000       0.111500       0.143400       0.784000
57197     57197     henan          114.3925       33.0847          108       178     2012      09        11        255              0.267208      24.988129      30.741142       0.355427       0.166000   -9999.000000       0.148900   -9999.000000
57197     57197     henan          114.3925       33.0847          108       178     2012      09        12        256              0.263208      23.342743       0.149201       0.404598       0.155500       0.130500       0.133500   -9999.000000
57197     57197     henan          114.3925       33.0847          108       178     2012      09        13        257              0.258208      21.854828       0.165172       0.379737       0.106000       0.250700   -9999.000000       0.851000
57197     57197     henan          114.3925       33.0847          108       178     2012      09        14        258              0.250958      20.885223       0.172875       0.365857       0.103000   -9999.000000   -9999.000000   -9999.000000
57197     57197     henan          114.3925       33.0847          108       178     2012      09        15        259              0.241583      21.954498       0.184712       0.355538   -9999.000000       0.126900       0.111300       0.728000
57197     57197     henan          114.3925       33.0847          108       178     2012      09        16        260              0.229583      22.467804       0.253288       0.347378       0.162000       0.170900       0.140000   -9999.000000
57197     57197     henan          114.3925       33.0847          108       178     2012      09        17        261              0.216250      22.693665       0.000000       0.341429       0.136000   -9999.000000       0.120300       0.688000
57197     57197     henan          114.3925       33.0847          108       178     2012      09        18        262              0.202500      22.266357       0.000000       0.335551       0.141500       0.147900       0.131500       0.749000
57197     57197     henan          114.3925       33.0847          108       178     2012      09        19        263              0.191375      23.485260       3.450824       0.329551       0.121000   -9999.000000   -9999.000000   -9999.000000
57197     57197     henan          114.3925       33.0847          108       178     2012      09        20        264              0.181667      24.495209       0.240832       0.324658       0.127000       0.037700       0.129300       0.657000
57197     57197     henan          114.3925       33.0847          108       178     2012      09        21        265              0.173667      24.700500       0.908343       0.320936   -9999.000000       0.032000       0.134500   -9999.000000
57197     57197     henan          114.3925       33.0847          108       178     2012      09        22        266              0.165042      24.230896       0.129905       0.320419       0.154000   -9999.000000       0.141700       0.616000
57197     57197     henan          114.3925       33.0847          108       178     2012      09        23        267              0.157792      25.011322       0.452416       0.315189       0.139000       0.395200       0.153500       0.678000
57197     57197     henan          114.3925       33.0847          108       178     2012      09        24        268              0.150958      25.113708      11.163315       0.310970       0.141000   -9999.000000   -9999.000000   -9999.000000
57197     57197     henan          114.3925       33.0847          108       178     2012      09        25        269              0.146000      25.229279       0.116558       0.305227       0.139000       0.193200   -9999.000000       0.544000
57197     57197     henan          114.3925       33.0847          108       178     2012      09        26        270              0.142250      25.544434       1.296261       0.301293   -9999.000000       0.086400       0.078800   -9999.000000
57197     57197     henan          114.3925       33.0847          108       178     2012      09        27        271              0.139786      24.699677       0.044548       0.299103       0.168000   -9999.000000       0.096900       0.519000
57197     57197     henan          114.3925       33.0847          108       178     2012      09        28        272              0.129500      24.491608       0.513344       0.293426       0.151000   -9999.000000       0.100500   -9999.000000
57197     57197     henan          114.3925       33.0847          108       178     2012      09        29        273              0.126708      20.253113       0.000000       0.284034       0.142000   -9999.000000       0.106900       0.618000
57197     57197     henan          114.3925       33.0847          108       178     2012      09        30        274              0.123792      20.444916       0.289666       0.279089       0.127000   -9999.000000   -9999.000000       0.324000
57197     57197     henan          114.3925       33.0847          108       178     2012      10        01        275              0.120792      20.885529       0.000000       0.274401       0.118000   -9999.000000   -9999.000000   -9999.000000
57197     57197     henan          114.3925       33.0847          108       178     2012      10        02        276              0.118500      21.514343       0.000000       0.268151       0.117000   -9999.000000       0.050900       0.373000
57197     57197     henan          114.3925       33.0847          108       178     2012      10        03        277              0.117167      22.038727       0.000000       0.262158       0.119000       0.103000       0.065000   -9999.000000
57197     57197     henan          114.3925       33.0847          108       178     2012      10        04        278              0.116417      22.299774       0.000000       0.256649       0.102500       0.086300       0.062800       0.502000
57197     57197     henan          114.3925       33.0847          108       178     2012      10        05        279              0.115917      21.896637       0.097831       0.256439       0.104000       0.025600       0.066000   -9999.000000
57197     57197     henan          114.3925       33.0847          108       178     2012      10        06        280              0.115792      20.615051       0.000000       0.259459       0.105000       0.120000   -9999.000000   -9999.000000
57197     57197     henan          114.3925       33.0847          108       178     2012      10        07        281              0.115625      21.718445       0.000000       0.256597   -9999.000000   -9999.000000       0.058900       0.454000
57197     57197     henan          114.3925       33.0847          108       178     2012      10        08        282              0.115417      22.435486       0.031522       0.253532       0.114000       0.093600       0.046700   -9999.000000
57197     57197     henan          114.3925       33.0847          108       178     2012      10        09        283              0.155000      22.850403       0.359443       0.249171       0.105500   -9999.000000       0.048000       0.542000
57197     57197     henan          114.3925       33.0847          108       178     2012      10        10        284              0.159833      22.130981       0.221046       0.243695       0.096000   -9999.000000       0.044200   -9999.000000
57197     57197     henan          114.3925       33.0847          108       178     2012      10        11        285              0.160875      20.977020       0.990943       0.236774       0.067000       0.167500   -9999.000000   -9999.000000
57197     57197     henan          114.3925       33.0847          108       178     2012      10        12        286              0.159750      20.947723       0.296360       0.233210   -9999.000000   -9999.000000   -9999.000000       0.535000
57197     57197     henan          114.3925       33.0847          108       178     2012      10        13        287              0.159875      20.387939       0.000000       0.238319       0.085000       0.032700       0.034700   -9999.000000
57197     57197     henan          114.3925       33.0847          108       178     2012      10        14        288              0.158417      21.394989       0.000000       0.236384       0.077000   -9999.000000       0.051500       0.514000
57197     57197     henan          114.3925       33.0847          108       178     2012      10        15        289              0.157333      21.831635       5.435109       0.232877       0.107000   -9999.000000       0.053800   -9999.000000
57197     57197     henan          114.3925       33.0847          108       178     2012      10        16        290              0.154958      21.436646       0.314679       0.255169       0.111000       0.196100       0.065400       0.893000
57197     57197     henan          114.3925       33.0847          108       178     2012      10        17        291              0.154792      17.000793       0.961311       0.282917       0.072000       0.122500   -9999.000000       0.515000
57197     57197     henan          114.3925       33.0847          108       178     2012      10        18        292              0.156333      16.454712       1.318450       0.267109   -9999.000000       0.252300       0.058300   -9999.000000
57197     57197     henan          114.3925       33.0847          108       178     2012      10        19        293              0.156708      18.498840       0.365527       0.260640       0.100000       0.206700       0.052700       0.499000
57197     57197     henan          114.3925       33.0847          108       178     2012      10        20        294              0.211542      18.707947       0.000000       0.259897       0.083000   -9999.000000       0.061100   -9999.000000
57197     57197     henan          114.3925       33.0847          108       178     2012      10        21        295              0.212875      20.587646       0.644290       0.256488       0.126000   -9999.000000       0.054900       0.608000
57197     57197     henan          114.3925       33.0847          108       178     2012      10        22        296              0.206500      20.878845       0.509028       0.257149   -9999.000000       0.134200       0.040200       0.455000
57197     57197     henan          114.3925       33.0847          108       178     2012      10        23        297              0.205375      16.282288       0.205303       0.258480   -9999.000000       0.389100   -9999.000000       0.533000
57197     57197     henan          114.3925       33.0847          108       178     2012      10        24        298              0.205292      17.245483       0.529609       0.253059   -9999.000000       0.081900       0.041600       0.367000
57197     57197     henan          114.3925       33.0847          108       178     2012      10        25        299              0.000000      18.170746       0.434350       0.248975       0.109500   -9999.000000       0.055000   -9999.000000
57197     57197     henan          114.3925       33.0847          108       178     2012      10        26        300              0.201583      19.278595       0.809607       0.246583       0.159500       0.122700       0.054700       0.520000
57197     57197     henan          114.3925       33.0847          108       178     2012      10        27        301              0.201583      16.468811       0.137858       0.258420       0.098000       0.042900       0.044300   -9999.000000
57197     57197     henan          114.3925       33.0847          108       178     2012      10        28        302              0.000000      18.315430       0.201729       0.255947       0.115000   -9999.000000   -9999.000000       0.556000
57197     57197     henan          114.3925       33.0847          108       178     2012      10        29        303              0.198750      18.893402       0.090170       0.254859       0.157000       0.087300   -9999.000000       0.537000
57197     57197     henan          114.3925       33.0847          108       178     2012      10        30        304              0.196292      16.798157       0.563024       0.257195       0.134000   -9999.000000       0.045000   -9999.000000
57197     57197     henan          114.3925       33.0847          108       178     2012      10        31        305              0.193417      15.239410       0.779927       0.256711       0.087000       0.096700       0.059100       0.351000
57197     57197     henan          114.3925       33.0847          108       178     2012      11        01        306              0.192375      14.107666       1.679677       0.254694       0.104000   -9999.000000       0.051300   -9999.000000
57197     57197     henan          114.3925       33.0847          108       178     2012      11        02        307              0.191417      15.000671       0.160076       0.252105       0.106000   -9999.000000       0.051800       0.426000
57197     57197     henan          114.3925       33.0847          108       178     2012      11        03        308              0.188917      16.285522      10.135893       0.247548   -9999.000000       0.125100   -9999.000000   -9999.000000
57197     57197     henan          114.3925       33.0847          108       178     2012      11        04        309              0.190042      10.502136       0.000000       0.317460   -9999.000000   -9999.000000       0.067100   -9999.000000
57197     57197     henan          114.3925       33.0847          108       178     2012      11        05        310              0.190792      10.369934       1.295012       0.298022       0.126000   -9999.000000       0.067800       0.367000
57197     57197     henan          114.3925       33.0847          108       178     2012      11        06        311              0.191875       9.657257       1.577446       0.292453       0.103000       0.275300       0.069900   -9999.000000
57197     57197     henan          114.3925       33.0847          108       178     2012      11        07        312              0.193042      11.089325       1.216572       0.288045       0.108000   -9999.000000       0.067000       0.434000
57197     57197     henan          114.3925       33.0847          108       178     2012      11        08        313              0.192667      12.744537       0.000000       0.290269   -9999.000000       0.139900   -9999.000000   -9999.000000
57197     57197     henan          114.3925       33.0847          108       178     2012      11        09        314              0.192792      11.688660       8.338585       0.295539       0.258000       0.359100   -9999.000000   -9999.000000
57197     57197     henan          114.3925       33.0847          108       178     2012      11        10        315              0.197708      11.857178       0.552453       0.322817   -9999.000000       0.145800       0.077100       0.796000
57197     57197     henan          114.3925       33.0847          108       178     2012      11        11        316              0.197708       9.794678       0.000000       0.328115   -9999.000000       0.232800       0.081200   -9999.000000
57197     57197     henan          114.3925       33.0847          108       178     2012      11        12        317              0.197833       9.346436       0.087069       0.317085       0.119000   -9999.000000       0.068500       0.504000
57197     57197     henan          114.3925       33.0847          108       178     2012      11        13        318              0.000000      10.558960       0.000000       0.314299       0.121000       0.114600       0.067800   -9999.000000
57197     57197     henan          114.3925       33.0847          108       178     2012      11        14        319              0.196042      10.628448       0.000000       0.309677   -9999.000000   -9999.000000   -9999.000000       0.462000
57197     57197     henan          114.3925       33.0847          108       178     2012      11        15        320              0.196167       9.289490       0.331561       0.305336       0.161000   -9999.000000   -9999.000000       0.417000
57197     57197     henan          114.3925       33.0847          108       178     2012      11        16        321              0.195292       9.314667       1.271733       0.304678       0.099000       0.086300       0.049000   -9999.000000
57197     57197     henan          114.3925       33.0847          108       178     2012      11        17        322              0.000000       9.516174       0.000000       0.302917       0.101000   -9999.000000       0.063300       0.358000
57197     57197     henan          114.3925       33.0847          108       178     2012      11        18        323              0.193625      11.084747       0.000000       0.301069       0.107000   -9999.000000       0.055500   -9999.000000
57197     57197     henan          114.3925       33.0847          108       178     2012      11        19        324              0.192833      11.708862       0.000000       0.299674   -9999.000000   -9999.000000       0.067400       0.348000
57197     57197     henan          114.3925       33.0847          108       178     2012      11        20        325              0.191333      11.460541       2.307847       0.298091       0.208000   -9999.000000   -9999.000000       0.423000
57197     57197     henan          114.3925       33.0847          108       178     2012      11        21        326              0.191625       9.499603       0.000000       0.305868       0.205000       0.297500       0.076400       0.640000
57197     57197     henan          114.3925       33.0847          108       178     2012      11        22        327              0.191167      10.435883       0.000000       0.310824       0.162000       0.198800       0.073400       0.639000
57197     57197     henan          114.3925       33.0847          108       178     2012      11        23        328              0.187667       9.271332       0.000000       0.309318   -9999.000000   -9999.000000       0.075500   -9999.000000
57197     57197     henan          114.3925       33.0847          108       178     2012      11        24        329              0.187500       7.009277       1.175329       0.306083   -9999.000000       0.156700       0.072200       0.434000
57197     57197     henan          114.3925       33.0847          108       178     2012      11        25        330              0.187542       8.483582       2.479231       0.307089   -9999.000000   -9999.000000   -9999.000000   -9999.000000
57197     57197     henan          114.3925       33.0847          108       178     2012      11        26        331              0.189333       6.164276       0.000000       0.325095   -9999.000000       0.124200   -9999.000000       0.648000
57197     57197     henan          114.3925       33.0847          108       178     2012      11        27        332              0.190875       6.838379       0.000000       0.315471   -9999.000000       0.237400       0.067400       0.443000
57197     57197     henan          114.3925       33.0847          108       178     2012      11        28        333              0.191167       8.853668       0.000000       0.312252   -9999.000000       0.110900       0.092500   -9999.000000
57197     57197     henan          114.3925       33.0847          108       178     2012      11        29        334              0.190875       7.099457       0.139588       0.309515   -9999.000000       0.156300       0.083000       0.353000
57197     57197     henan          114.3925       33.0847          108       178     2012      11        30        335              0.191083       6.686829       0.000000       0.309472   -9999.000000   -9999.000000       0.097300   -9999.000000
57197     57197     henan          114.3925       33.0847          108       178     2012      12        01        336              0.187500       7.947906       0.552885       0.308503   -9999.000000   -9999.000000   -9999.000000       0.631000
57197     57197     henan          114.3925       33.0847          108       178     2012      12        02        337              0.186083       3.877075       0.000000       0.310993   -9999.000000       0.083400   -9999.000000   -9999.000000
57197     57197     henan          114.3925       33.0847          108       178     2012      12        03        338              0.184750       3.957031       0.000000       0.311768   -9999.000000       0.093000       0.097700   -9999.000000
57197     57197     henan          114.3925       33.0847          108       178     2012      12        04        339              0.183792       5.528290       0.000000       0.306772   -9999.000000       0.194000       0.109000       0.291000
57197     57197     henan          114.3925       33.0847          108       178     2012      12        05        340              0.181750       5.938721       0.140958       0.307674   -9999.000000   -9999.000000       0.107900   -9999.000000
57197     57197     henan          114.3925       33.0847          108       178     2012      12        06        341              0.178875       5.616302       0.288612       0.304756       0.171000       0.039800       0.106500       0.309000
57197     57197     henan          114.3925       33.0847          108       178     2012      12        07        342              0.177792       5.876526       0.137316       0.306045   -9999.000000       0.111400   -9999.000000   -9999.000000
57197     57197     henan          114.3925       33.0847          108       178     2012      12        08        343              0.174083       5.546997       0.000000       0.304324   -9999.000000   -9999.000000       0.097300   -9999.000000
57197     57197     henan          114.3925       33.0847          108       178     2012      12        09        344              0.170167       4.382782       0.432057       0.298560   -9999.000000       0.105700       0.106400       0.196000
57197     57197     henan          114.3925       33.0847          108       178     2012      12        10        345              0.166792       3.386597       0.000000       0.291866   -9999.000000   -9999.000000       0.087000   -9999.000000
57197     57197     henan          114.3925       33.0847          108       178     2012      12        11        346              0.164625       2.935394       0.484586       0.284318   -9999.000000       0.095200       0.083000       0.177000
57197     57197     henan          114.3925       33.0847          108       178     2012      12        12        347              0.163958       2.666443       0.357215       0.280930       0.150000       0.167200   -9999.000000   -9999.000000
57197     57197     henan          114.3925       33.0847          108       178     2012      12        13        348              0.174708       3.495270      12.702264       0.296991   -9999.000000   -9999.000000   -9999.000000       0.816000
57197     57197     henan          114.3925       33.0847          108       178     2012      12        14        349              0.189708       1.845245       4.726615       0.343734   -9999.000000       0.128200       0.075500       0.623000
57197     57197     henan          114.3925       33.0847          108       178     2012      12        15        350              0.000000       2.791229       0.000000       0.338142   -9999.000000       0.159900       0.121500   -9999.000000
57197     57197     henan          114.3925       33.0847          108       178     2012      12        16        351              0.192792       2.718536       0.303544       0.337495   -9999.000000   -9999.000000       0.110900       0.646000
57197     57197     henan          114.3925       33.0847          108       178     2012      12        17        352              0.193208       3.349915       0.139238       0.335936   -9999.000000   -9999.000000       0.115900   -9999.000000
57197     57197     henan          114.3925       33.0847          108       178     2012      12        18        353              0.192750       2.694092       0.000000       0.328457   -9999.000000   -9999.000000   -9999.000000       0.399000
57197     57197     henan          114.3925       33.0847          108       178     2012      12        19        354              0.191750       2.128510       0.374790       0.300059   -9999.000000   -9999.000000       0.152600       0.411000
57197     57197     henan          114.3925       33.0847          108       178     2012      12        20        355              0.000000       1.934631       0.144016       0.305550   -9999.000000       0.054300       0.118900       0.386000
57197     57197     henan          114.3925       33.0847          108       178     2012      12        21        356              0.194833       1.201569       1.118019       0.302464   -9999.000000       0.187800       0.126900       0.430000
57197     57197     henan          114.3925       33.0847          108       178     2012      12        22        357              0.194792       1.641846       0.000000       0.301107   -9999.000000       0.098300       0.144900   -9999.000000
57197     57197     henan          114.3925       33.0847          108       178     2012      12        23        358              0.192833       1.701050       0.000000       0.293345   -9999.000000   -9999.000000   -9999.000000       0.157000
57197     57197     henan          114.3925       33.0847          108       178     2012      12        24        359              0.192143       0.075500       0.000000       0.251919   -9999.000000       0.112800   -9999.000000   -9999.000000
57197     57197     henan          114.3925       33.0847          108       178     2012      12        25        360              0.192000       1.228149       0.000000       0.276940   -9999.000000       0.049100       0.096100       0.270000
57197     57197     henan          114.3925       33.0847          108       178     2012      12        26        361              0.000000       0.680908       0.230066       0.269851   -9999.000000   -9999.000000       0.141700       0.248000
57197     57197     henan          114.3925       33.0847          108       178     2012      12        27        362              0.193000      -0.148376       0.978664       0.231796   -9999.000000       0.080600       0.141300   -9999.000000
57197     57197     henan          114.3925       33.0847          108       178     2012      12        28        363              0.197000       0.271912       0.936563       0.250452   -9999.000000   -9999.000000       0.166900       0.489000
57197     57197     henan          114.3925       33.0847          108       178     2012      12        29        364              0.000000       0.760651       1.103568       0.281075   -9999.000000   -9999.000000   -9999.000000   -9999.000000
57197     57197     henan          114.3925       33.0847          108       178     2012      12        30        365              0.000000       0.068695       0.778974       0.262888   -9999.000000       0.076100   -9999.000000       0.249000
57197     57197     henan          114.3925       33.0847          108       178     2012      12        31        366              0.213800       0.284760       0.201920       0.253632   -9999.000000   -9999.000000       0.089300   -9999.000000
