# Supplementary material for: Research on Fusing Multisatellite Soil Moisture Data Based on Bayesian Model Averaging
Source: Hindawi journal article supplement (doi:10.1155/2018/9310838), 2018-06-25
Supplement: f1 [file 9310838.f1.zip › 2012_sm00-10cm_daily_ZDB_ZHY_57251_366days_allin.txt]

57251     57251     hubei          110.4197       33.0000          108       162     2012      01        01        001              0.000000   -9999.000000       0.000000   -9999.000000       0.107000   -9999.000000       0.050800   -9999.000000
57251     57251     hubei          110.4197       33.0000          108       162     2012      01        02        002              0.254917       2.702240       0.000000       0.175546       0.103000       0.122500   -9999.000000       0.193000
57251     57251     hubei          110.4197       33.0000          108       162     2012      01        03        003              0.000000       4.509674       0.000000       0.184789       0.100000   -9999.000000   -9999.000000   -9999.000000
57251     57251     hubei          110.4197       33.0000          108       162     2012      01        04        004              0.251125       2.599213       0.000000       0.166146   -9999.000000   -9999.000000       0.059600   -9999.000000
57251     57251     hubei          110.4197       33.0000          108       162     2012      01        05        005              0.249708       1.774323       3.555764       0.154969   -9999.000000       0.067800       0.063800       0.089000
57251     57251     hubei          110.4197       33.0000          108       162     2012      01        06        006              0.248708       1.327698       0.000000       0.152716       0.107000   -9999.000000       0.069800   -9999.000000
57251     57251     hubei          110.4197       33.0000          108       162     2012      01        07        007              0.248167       2.605896       0.000000       0.162113   -9999.000000       0.139200       0.069700       0.013000
57251     57251     hubei          110.4197       33.0000          108       162     2012      01        08        008              0.000000       1.396667       0.000000       0.159475       0.101000   -9999.000000   -9999.000000   -9999.000000
57251     57251     hubei          110.4197       33.0000          108       162     2012      01        09        009              0.246083       2.845764       0.000000       0.161138   -9999.000000   -9999.000000   -9999.000000       0.033000
57251     57251     hubei          110.4197       33.0000          108       162     2012      01        10        010              0.245250       2.875702       0.000000       0.162198   -9999.000000       0.038800       0.034500       0.134000
57251     57251     hubei          110.4197       33.0000          108       162     2012      01        11        011              0.244208       3.134918       0.000000       0.161957       0.089000   -9999.000000       0.037300   -9999.000000
57251     57251     hubei          110.4197       33.0000          108       162     2012      01        12        012              0.243417       2.374634       0.000000       0.155223       0.087000   -9999.000000       0.038200       0.015000
57251     57251     hubei          110.4197       33.0000          108       162     2012      01        13        013              0.242958       1.206238       0.000000       0.150634       0.098000       0.016000       0.038600   -9999.000000
57251     57251     hubei          110.4197       33.0000          108       162     2012      01        14        014              0.243250       1.766602       0.275297       0.160552   -9999.000000   -9999.000000   -9999.000000       0.023000
57251     57251     hubei          110.4197       33.0000          108       162     2012      01        15        015              0.243708       2.066345       0.000000       0.170444       0.106000       0.049200       0.037400       0.011000
57251     57251     hubei          110.4197       33.0000          108       162     2012      01        16        016              0.243542       2.143768       0.000000       0.170790       0.102000   -9999.000000       0.032100       0.046000
57251     57251     hubei          110.4197       33.0000          108       162     2012      01        17        017              0.000000       2.257812       1.947807       0.169452       0.105000   -9999.000000       0.035600       0.060000
57251     57251     hubei          110.4197       33.0000          108       162     2012      01        18        018              0.243125       3.839935       2.422751       0.174405       0.102000   -9999.000000       0.036600   -9999.000000
57251     57251     hubei          110.4197       33.0000          108       162     2012      01        19        019              0.242958       3.058197       0.383886       0.174997   -9999.000000   -9999.000000   -9999.000000       0.083000
57251     57251     hubei          110.4197       33.0000          108       162     2012      01        20        020              0.242708       2.635071       2.645715       0.177351       0.109000       0.032900   -9999.000000   -9999.000000
57251     57251     hubei          110.4197       33.0000          108       162     2012      01        21        021              0.242792       2.165619       0.357878       0.196269   -9999.000000   -9999.000000       0.027300   -9999.000000
57251     57251     hubei          110.4197       33.0000          108       162     2012      01        22        022              0.243792       0.497894       3.884903       0.170484   -9999.000000   -9999.000000       0.034000   -9999.000000
57251     57251     hubei          110.4197       33.0000          108       162     2012      01        23        023              0.244750      -0.374817       1.921954       0.149913   -9999.000000       0.021200       0.035500   -9999.000000
57251     57251     hubei          110.4197       33.0000          108       162     2012      01        24        024              0.245292       0.172638       0.623812       0.164549       0.092000   -9999.000000   -9999.000000       0.012000
57251     57251     hubei          110.4197       33.0000          108       162     2012      01        25        025              0.245625       0.699341       0.395525       0.165836   -9999.000000   -9999.000000   -9999.000000   -9999.000000
57251     57251     hubei          110.4197       33.0000          108       162     2012      01        26        026              0.245708       1.697998       0.136634       0.172370   -9999.000000   -9999.000000       0.034400       0.094000
57251     57251     hubei          110.4197       33.0000          108       162     2012      01        27        027              0.245708       2.118622       0.000000       0.176692       0.086000   -9999.000000       0.035200   -9999.000000
57251     57251     hubei          110.4197       33.0000          108       162     2012      01        28        028              0.245958       2.716309       0.000000       0.183210       0.081000   -9999.000000       0.035300   -9999.000000
57251     57251     hubei          110.4197       33.0000          108       162     2012      01        29        029              0.245958       4.028534       0.000000       0.186270       0.091000   -9999.000000       0.040800       0.141000
57251     57251     hubei          110.4197       33.0000          108       162     2012      01        30        030              0.245708       2.885590       2.483504       0.187595   -9999.000000       0.130500   -9999.000000   -9999.000000
57251     57251     hubei          110.4197       33.0000          108       162     2012      01        31        031              0.245208       2.945526       0.000000       0.178934       0.094000       0.027600   -9999.000000       0.206000
57251     57251     hubei          110.4197       33.0000          108       162     2012      02        01        032              0.244750       5.547363       0.000000       0.183927   -9999.000000   -9999.000000       0.041000   -9999.000000
57251     57251     hubei          110.4197       33.0000          108       162     2012      02        02        033              0.000000       1.837952       0.000000       0.178949       0.087000       0.080000       0.040900   -9999.000000
57251     57251     hubei          110.4197       33.0000          108       162     2012      02        03        034              0.000000       1.691833       0.000000       0.165580       0.086000   -9999.000000       0.046700       0.095000
57251     57251     hubei          110.4197       33.0000          108       162     2012      02        04        035              0.000000       3.655060       0.000000       0.171354   -9999.000000   -9999.000000       0.047400   -9999.000000
57251     57251     hubei          110.4197       33.0000          108       162     2012      02        05        036              0.000000       2.674957       0.000000       0.176053       0.091000       0.057500   -9999.000000       0.155000
57251     57251     hubei          110.4197       33.0000          108       162     2012      02        06        037              0.000000       5.024689       0.000000       0.182381       0.081000   -9999.000000   -9999.000000   -9999.000000
57251     57251     hubei          110.4197       33.0000          108       162     2012      02        07        038              0.000000       5.889496       0.217646       0.177978   -9999.000000       0.033700       0.043700       0.073000
57251     57251     hubei          110.4197       33.0000          108       162     2012      02        08        039              0.000000       4.107910       0.000000       0.171420   -9999.000000   -9999.000000       0.048800       0.056000
57251     57251     hubei          110.4197       33.0000          108       162     2012      02        09        040              0.000000       4.024139       0.090213       0.164082       0.095000   -9999.000000       0.054000   -9999.000000
57251     57251     hubei          110.4197       33.0000          108       162     2012      02        10        041              0.237000       2.034119       2.102959       0.161093   -9999.000000       0.093200       0.053100       0.025000
57251     57251     hubei          110.4197       33.0000          108       162     2012      02        11        042              0.000000       4.300018       0.000000       0.159901   -9999.000000   -9999.000000   -9999.000000   -9999.000000
57251     57251     hubei          110.4197       33.0000          108       162     2012      02        12        043              0.000000       4.964142       0.000000       0.162686   -9999.000000   -9999.000000   -9999.000000       0.029000
57251     57251     hubei          110.4197       33.0000          108       162     2012      02        13        044              0.000000       3.092773       0.000000       0.160265       0.096000   -9999.000000   -9999.000000       0.045000
57251     57251     hubei          110.4197       33.0000          108       162     2012      02        14        045              0.000000       4.513611       0.000000       0.164519       0.093000   -9999.000000       0.044200       0.217000
57251     57251     hubei          110.4197       33.0000          108       162     2012      02        15        046              0.234000       4.292999       0.045019       0.169012   -9999.000000   -9999.000000       0.045800       0.018000
57251     57251     hubei          110.4197       33.0000          108       162     2012      02        16        047              0.232176       3.709930       0.157981       0.169357       0.096000   -9999.000000   -9999.000000   -9999.000000
57251     57251     hubei          110.4197       33.0000          108       162     2012      02        17        048              0.000000       4.785767       0.000000       0.168514       0.084000   -9999.000000   -9999.000000       0.006000
57251     57251     hubei          110.4197       33.0000          108       162     2012      02        18        049              0.000000       5.558350       0.000000       0.163378       0.072000       0.110500       0.039900   -9999.000000
57251     57251     hubei          110.4197       33.0000          108       162     2012      02        19        050              0.000000       5.423401       0.000000       0.159340       0.087000   -9999.000000       0.040100       0.105000
57251     57251     hubei          110.4197       33.0000          108       162     2012      02        20        051              0.000000       5.963654       0.000000       0.162515   -9999.000000       0.010700       0.041300       0.061000
57251     57251     hubei          110.4197       33.0000          108       162     2012      02        21        052              0.000000       5.204987       0.000000       0.164116       0.073000   -9999.000000   -9999.000000   -9999.000000
57251     57251     hubei          110.4197       33.0000          108       162     2012      02        22        053              0.000000       9.363892       0.000000       0.163336       0.067000   -9999.000000   -9999.000000       0.179000
57251     57251     hubei          110.4197       33.0000          108       162     2012      02        23        054              0.000000      10.582611       0.359000       0.161054       0.077000       0.078500   -9999.000000   -9999.000000
57251     57251     hubei          110.4197       33.0000          108       162     2012      02        24        055              0.000000       4.671417       0.000000       0.165434       0.071000   -9999.000000       0.032200       0.142000
57251     57251     hubei          110.4197       33.0000          108       162     2012      02        25        056              0.000000       4.140442       0.000000       0.165384   -9999.000000       0.017800       0.036900   -9999.000000
57251     57251     hubei          110.4197       33.0000          108       162     2012      02        26        057              0.000000       2.939362       0.252212       0.161048   -9999.000000   -9999.000000       0.040500   -9999.000000
57251     57251     hubei          110.4197       33.0000          108       162     2012      02        27        058              0.000000       3.884613       0.000000       0.160118       0.068000   -9999.000000   -9999.000000       0.103000
57251     57251     hubei          110.4197       33.0000          108       162     2012      02        28        059              0.225667       5.430786       0.000000       0.159513       0.074000   -9999.000000   -9999.000000   -9999.000000
57251     57251     hubei          110.4197       33.0000          108       162     2012      02        29        060              0.000000   -9999.000000       0.000000   -9999.000000       0.073000   -9999.000000   -9999.000000   -9999.000000
57251     57251     hubei          110.4197       33.0000          108       162     2012      03        01        061              0.225000       5.236664       0.709459       0.161334       0.099000       0.158400       0.032600   -9999.000000
57251     57251     hubei          110.4197       33.0000          108       162     2012      03        02        062              0.225000       4.331696       0.570060       0.172427       0.108000   -9999.000000       0.033600   -9999.000000
57251     57251     hubei          110.4197       33.0000          108       162     2012      03        03        063              0.225792       4.034241       1.163726       0.176918       0.114000   -9999.000000       0.037600       0.120000
57251     57251     hubei          110.4197       33.0000          108       162     2012      03        04        064              0.226000       3.379852       0.410757       0.191963   -9999.000000   -9999.000000   -9999.000000   -9999.000000
57251     57251     hubei          110.4197       33.0000          108       162     2012      03        05        065              0.226417       2.355713       0.344040       0.180187       0.100500   -9999.000000   -9999.000000       0.192000
57251     57251     hubei          110.4197       33.0000          108       162     2012      03        06        066              0.226792       5.216125       0.000000       0.185880       0.101000       0.172100       0.045700   -9999.000000
57251     57251     hubei          110.4197       33.0000          108       162     2012      03        07        067              0.000000       7.256714       0.157389       0.183780   -9999.000000       0.170400       0.046400       0.238000
57251     57251     hubei          110.4197       33.0000          108       162     2012      03        08        068              0.227625       7.498352       2.402216       0.180376       0.106000   -9999.000000       0.049800       0.194000
57251     57251     hubei          110.4197       33.0000          108       162     2012      03        09        069              0.228000       5.436737       0.117148       0.202062       0.101500       0.059100       0.050100   -9999.000000
57251     57251     hubei          110.4197       33.0000          108       162     2012      03        10        070              0.228125       5.612579       0.211315       0.196249       0.092500   -9999.000000   -9999.000000       0.169000
57251     57251     hubei          110.4197       33.0000          108       162     2012      03        11        071              0.227708      10.041229       0.000000       0.187947       0.081000   -9999.000000   -9999.000000   -9999.000000
57251     57251     hubei          110.4197       33.0000          108       162     2012      03        12        072              0.229500       8.447144       0.000000       0.179242   -9999.000000       0.149500       0.042200       0.188000
57251     57251     hubei          110.4197       33.0000          108       162     2012      03        13        073              0.231045       8.857941       0.000000       0.174723       0.092000   -9999.000000       0.048500       0.211000
57251     57251     hubei          110.4197       33.0000          108       162     2012      03        14        074              0.231667      12.922058       0.423677       0.167906       0.078000       0.022200   -9999.000000       0.394000
57251     57251     hubei          110.4197       33.0000          108       162     2012      03        15        075              0.231833      12.301086       4.628532       0.166241       0.097500   -9999.000000       0.056300       0.196000
57251     57251     hubei          110.4197       33.0000          108       162     2012      03        16        076              0.232957       8.848358       0.000000       0.215757       0.083000   -9999.000000   -9999.000000   -9999.000000
57251     57251     hubei          110.4197       33.0000          108       162     2012      03        17        077              0.236208      12.920258       0.000000       0.200191   -9999.000000   -9999.000000       0.047000       0.254000
57251     57251     hubei          110.4197       33.0000          108       162     2012      03        18        078              0.238083      15.285278       1.564891       0.187017   -9999.000000   -9999.000000       0.052400   -9999.000000
57251     57251     hubei          110.4197       33.0000          108       162     2012      03        19        079              0.236667      15.404602       0.470318       0.181601       0.095000       0.038400       0.052600       0.181000
57251     57251     hubei          110.4197       33.0000          108       162     2012      03        20        080              0.235609       7.691071       0.116021       0.189731       0.096000   -9999.000000       0.056700       0.061000
57251     57251     hubei          110.4197       33.0000          108       162     2012      03        21        081              0.237917       6.738159       6.279842       0.185526       0.124000   -9999.000000   -9999.000000   -9999.000000
57251     57251     hubei          110.4197       33.0000          108       162     2012      03        22        082              0.241250       4.653046       0.332423       0.234098       0.113000   -9999.000000   -9999.000000       0.471000
57251     57251     hubei          110.4197       33.0000          108       162     2012      03        23        083              0.243042       6.537415       0.000000       0.224884       0.102000   -9999.000000       0.048800   -9999.000000
57251     57251     hubei          110.4197       33.0000          108       162     2012      03        24        084              0.245750       9.857666       0.000000       0.208282       0.105000   -9999.000000       0.048900       0.339000
57251     57251     hubei          110.4197       33.0000          108       162     2012      03        25        085              0.000000      13.423676       0.000000       0.194307       0.094000   -9999.000000       0.050900   -9999.000000
57251     57251     hubei          110.4197       33.0000          108       162     2012      03        26        086              0.249542      15.824707       1.019083       0.181659       0.089500   -9999.000000       0.068000   -9999.000000
57251     57251     hubei          110.4197       33.0000          108       162     2012      03        27        087              0.249542      17.698425       0.000000       0.179470       0.092000       0.114100   -9999.000000       0.322000
57251     57251     hubei          110.4197       33.0000          108       162     2012      03        28        088              0.247667      18.857697       5.773131       0.171171   -9999.000000   -9999.000000   -9999.000000   -9999.000000
57251     57251     hubei          110.4197       33.0000          108       162     2012      03        29        089              0.247792      15.863739       0.550669       0.204528       0.101000   -9999.000000       0.060600       0.423000
57251     57251     hubei          110.4197       33.0000          108       162     2012      03        30        090              0.246417      17.836121       0.035610       0.212776       0.092500       0.082400       0.065800   -9999.000000
57251     57251     hubei          110.4197       33.0000          108       162     2012      03        31        091              0.244583      15.520294       0.000000       0.194755       0.091500   -9999.000000       0.068600   -9999.000000
57251     57251     hubei          110.4197       33.0000          108       162     2012      04        01        092              0.243917      16.763489       0.000000       0.178269       0.098000       0.058000       0.067000       0.352000
57251     57251     hubei          110.4197       33.0000          108       162     2012      04        02        093              0.241208      19.753571       0.000000       0.166952   -9999.000000   -9999.000000   -9999.000000   -9999.000000
57251     57251     hubei          110.4197       33.0000          108       162     2012      04        03        094              0.238167      18.129456       0.000000       0.159119       0.105000   -9999.000000       0.049600       0.330000
57251     57251     hubei          110.4197       33.0000          108       162     2012      04        04        095              0.236667      18.005157       0.048643       0.153120       0.093500       0.279300       0.048100   -9999.000000
57251     57251     hubei          110.4197       33.0000          108       162     2012      04        05        096              0.235667      17.952087       0.000000       0.150025       0.099500   -9999.000000       0.049200       0.414000
57251     57251     hubei          110.4197       33.0000          108       162     2012      04        06        097              0.234375      20.017853       0.000000       0.145304       0.096000   -9999.000000       0.050800       0.304000
57251     57251     hubei          110.4197       33.0000          108       162     2012      04        07        098              0.232792      20.789368       0.505746       0.141202       0.090000   -9999.000000   -9999.000000   -9999.000000
57251     57251     hubei          110.4197       33.0000          108       162     2012      04        08        099              0.232208      19.585907       0.266265       0.139575       0.092000   -9999.000000   -9999.000000       0.319000
57251     57251     hubei          110.4197       33.0000          108       162     2012      04        09        100              0.231400      21.638763       1.033643       0.137536       0.100000       0.013200       0.051000   -9999.000000
57251     57251     hubei          110.4197       33.0000          108       162     2012      04        10        101              0.231471      17.662292       0.606443       0.151828       0.095000   -9999.000000       0.056600       0.116000
57251     57251     hubei          110.4197       33.0000          108       162     2012      04        11        102              0.230250      21.334259       2.044581       0.147906       0.120000   -9999.000000       0.054300       0.300000
57251     57251     hubei          110.4197       33.0000          108       162     2012      04        12        103              0.227875      20.480988       0.853417       0.151245   -9999.000000   -9999.000000       0.059400       0.269000
57251     57251     hubei          110.4197       33.0000          108       162     2012      04        13        104              0.228083      12.904694       0.126676       0.176699   -9999.000000   -9999.000000   -9999.000000       0.023000
57251     57251     hubei          110.4197       33.0000          108       162     2012      04        14        105              0.227917      18.836670       0.000000       0.160048       0.124000       0.104500       0.052600   -9999.000000
57251     57251     hubei          110.4197       33.0000          108       162     2012      04        15        106              0.228000      17.443665       0.210256       0.149768       0.107000   -9999.000000       0.050700       0.186000
57251     57251     hubei          110.4197       33.0000          108       162     2012      04        16        107              0.228583      19.819580       0.157760       0.143103       0.097000       0.083600       0.071600   -9999.000000
57251     57251     hubei          110.4197       33.0000          108       162     2012      04        17        108              0.227917      22.405548       0.000000       0.136685       0.103000       0.053100       0.072900       0.153000
57251     57251     hubei          110.4197       33.0000          108       162     2012      04        18        109              0.227375      18.863190       0.000000       0.134631   -9999.000000   -9999.000000   -9999.000000       0.119000
57251     57251     hubei          110.4197       33.0000          108       162     2012      04        19        110              0.227125      21.747498       0.140026       0.130405       0.109000       0.059200   -9999.000000   -9999.000000
57251     57251     hubei          110.4197       33.0000          108       162     2012      04        20        111              0.226667      24.286377       1.644468       0.125973       0.105000   -9999.000000       0.066500       0.309000
57251     57251     hubei          110.4197       33.0000          108       162     2012      04        21        112              0.227083      18.582886       0.968848       0.147399       0.167000       0.050500       0.070000   -9999.000000
57251     57251     hubei          110.4197       33.0000          108       162     2012      04        22        113              0.227792      22.518433       0.000000       0.146252       0.146000       0.134400   -9999.000000       0.323000
57251     57251     hubei          110.4197       33.0000          108       162     2012      04        23        114              0.227792      24.704407       4.657813       0.136822   -9999.000000   -9999.000000       0.103800   -9999.000000
57251     57251     hubei          110.4197       33.0000          108       162     2012      04        24        115              0.228000      23.017639       0.863721       0.172636       0.175000   -9999.000000   -9999.000000   -9999.000000
57251     57251     hubei          110.4197       33.0000          108       162     2012      04        25        116              0.000000      17.661530       0.000000       0.189320       0.156500   -9999.000000   -9999.000000       0.225000
57251     57251     hubei          110.4197       33.0000          108       162     2012      04        26        117              0.228750      19.539062       0.000000       0.165474       0.162500   -9999.000000       0.097400   -9999.000000
57251     57251     hubei          110.4197       33.0000          108       162     2012      04        27        118              0.230375      22.554871       0.000000       0.146121       0.132000       0.099400       0.100500       0.330000
57251     57251     hubei          110.4197       33.0000          108       162     2012      04        28        119              0.229750      24.866364       0.000000       0.131563       0.151000   -9999.000000       0.105500   -9999.000000
57251     57251     hubei          110.4197       33.0000          108       162     2012      04        29        120              0.228792      24.740814       0.000000       0.124394       0.162000       0.138100       0.106100   -9999.000000
57251     57251     hubei          110.4197       33.0000          108       162     2012      04        30        121              0.228000      22.623322       4.350635       0.122083       0.204000   -9999.000000   -9999.000000       0.839000
57251     57251     hubei          110.4197       33.0000          108       162     2012      05        01        122              0.231333      19.657532       1.477407       0.166429       0.194000   -9999.000000       0.132200   -9999.000000
57251     57251     hubei          110.4197       33.0000          108       162     2012      05        02        123              0.236667      19.653717       0.436599       0.185706       0.180000       0.046100       0.125200       0.563000
57251     57251     hubei          110.4197       33.0000          108       162     2012      05        03        124              0.236958      22.195526       1.054821       0.173980       0.183000   -9999.000000       0.126300   -9999.000000
57251     57251     hubei          110.4197       33.0000          108       162     2012      05        04        125              0.235833      21.354431       0.463064       0.165515   -9999.000000       0.105500       0.130100       0.548000
57251     57251     hubei          110.4197       33.0000          108       162     2012      05        05        126              0.234708      23.342926       0.000000       0.150881       0.165000   -9999.000000       0.113100       0.401000
57251     57251     hubei          110.4197       33.0000          108       162     2012      05        06        127              0.233125      25.571411       0.424874       0.135630       0.149000   -9999.000000   -9999.000000   -9999.000000
57251     57251     hubei          110.4197       33.0000          108       162     2012      05        07        128              0.231958      26.955505       0.962516       0.128649   -9999.000000       0.043700       0.083100       0.695000
57251     57251     hubei          110.4197       33.0000          108       162     2012      05        08        129              0.231833      23.186371       0.066918       0.140544       0.156000   -9999.000000       0.081700   -9999.000000
57251     57251     hubei          110.4197       33.0000          108       162     2012      05        09        130              0.230625      27.202698       0.000000       0.131121   -9999.000000       0.203100       0.083400       0.346000
57251     57251     hubei          110.4197       33.0000          108       162     2012      05        10        131              0.229792      25.159576       0.000000       0.125140       0.179000   -9999.000000       0.080200       0.343000
57251     57251     hubei          110.4197       33.0000          108       162     2012      05        11        132              0.228625      26.088776       2.036996       0.120141       0.235000   -9999.000000   -9999.000000       0.410000
57251     57251     hubei          110.4197       33.0000          108       162     2012      05        12        133              0.226833      24.856476       1.225860       0.128602       0.218000       0.087600   -9999.000000       0.271000
57251     57251     hubei          110.4197       33.0000          108       162     2012      05        13        134              0.225042      19.562592       8.065791       0.155303   -9999.000000   -9999.000000       0.076000   -9999.000000
57251     57251     hubei          110.4197       33.0000          108       162     2012      05        14        135              0.226667      20.000031       0.299192       0.197423   -9999.000000   -9999.000000       0.062500       0.331000
57251     57251     hubei          110.4197       33.0000          108       162     2012      05        15        136              0.227833      22.462372       0.204624       0.191421       0.205000       0.050400       0.057300   -9999.000000
57251     57251     hubei          110.4197       33.0000          108       162     2012      05        16        137              0.228292      23.428772       0.000000       0.169508       0.180500   -9999.000000       0.059000       0.308000
57251     57251     hubei          110.4197       33.0000          108       162     2012      05        17        138              0.228667      24.481384       0.000000       0.150384       0.200500       0.223000   -9999.000000       0.271000
57251     57251     hubei          110.4197       33.0000          108       162     2012      05        18        139              0.228000      26.052216       1.248905       0.136693       0.198000   -9999.000000       0.060200   -9999.000000
57251     57251     hubei          110.4197       33.0000          108       162     2012      05        19        140              0.228208      24.654449       0.000000       0.130792       0.179000   -9999.000000       0.056800       0.172000
57251     57251     hubei          110.4197       33.0000          108       162     2012      05        20        141              0.227958      27.275604       0.283505       0.124292   -9999.000000       0.100600       0.058600   -9999.000000
57251     57251     hubei          110.4197       33.0000          108       162     2012      05        21        142              0.226375      27.276215       2.368920       0.118689       0.355000   -9999.000000       0.112500       0.277000
57251     57251     hubei          110.4197       33.0000          108       162     2012      05        22        143              0.225000      24.759003       8.173041       0.122694       0.354000       0.022700   -9999.000000   -9999.000000
57251     57251     hubei          110.4197       33.0000          108       162     2012      05        23        144              0.225875      20.671021       0.304778       0.211233   -9999.000000       0.207800   -9999.000000   -9999.000000
57251     57251     hubei          110.4197       33.0000          108       162     2012      05        24        145              0.226000      21.198395       1.719675       0.194446   -9999.000000   -9999.000000       0.105200       0.725000
57251     57251     hubei          110.4197       33.0000          108       162     2012      05        25        146              0.000000      20.034241       0.125340       0.196705   -9999.000000   -9999.000000       0.111200   -9999.000000
57251     57251     hubei          110.4197       33.0000          108       162     2012      05        26        147              0.229042      20.694031       0.064978       0.183110       0.294000   -9999.000000       0.101000       0.278000
57251     57251     hubei          110.4197       33.0000          108       162     2012      05        27        148              0.229667      24.456116       0.000000       0.165748       0.278000       0.068600       0.107400   -9999.000000
57251     57251     hubei          110.4197       33.0000          108       162     2012      05        28        149              0.229417      24.586700      10.167879       0.152508       0.236000       0.029000   -9999.000000   -9999.000000
57251     57251     hubei          110.4197       33.0000          108       162     2012      05        29        150              0.237875      24.053833       1.436780       0.185338       0.311000   -9999.000000   -9999.000000       0.414000
57251     57251     hubei          110.4197       33.0000          108       162     2012      05        30        151              0.240417      23.144684       0.000000       0.231188   -9999.000000   -9999.000000       0.095400   -9999.000000
57251     57251     hubei          110.4197       33.0000          108       162     2012      05        31        152              0.238708      24.617065       0.127892       0.196472       0.290000   -9999.000000       0.108300   -9999.000000
57251     57251     hubei          110.4197       33.0000          108       162     2012      06        01        153              0.238125      22.563904       0.391958       0.182531       0.203000   -9999.000000       0.110600   -9999.000000
57251     57251     hubei          110.4197       33.0000          108       162     2012      06        02        154              0.237708      22.479370       0.560293       0.171514       0.211500       0.059000       0.106400       0.498000
57251     57251     hubei          110.4197       33.0000          108       162     2012      06        03        155              0.236833      24.393707       0.000000       0.155923       0.186000   -9999.000000   -9999.000000       0.345000
57251     57251     hubei          110.4197       33.0000          108       162     2012      06        04        156              0.237250      23.821564       0.000000       0.147291   -9999.000000       0.081600       0.090500   -9999.000000
57251     57251     hubei          110.4197       33.0000          108       162     2012      06        05        157              0.235250      25.643005       0.599221       0.138711       0.235000   -9999.000000       0.100900       0.473000
57251     57251     hubei          110.4197       33.0000          108       162     2012      06        06        158              0.235292      23.328217       0.000000       0.141767       0.213000   -9999.000000       0.091200   -9999.000000
57251     57251     hubei          110.4197       33.0000          108       162     2012      06        07        159              0.235042      24.989410       0.000000       0.137458       0.217500   -9999.000000       0.093700       0.454000
57251     57251     hubei          110.4197       33.0000          108       162     2012      06        08        160              0.233958      27.297668       0.000000       0.128583       0.207000   -9999.000000   -9999.000000       0.503000
57251     57251     hubei          110.4197       33.0000          108       162     2012      06        09        161              0.231917      28.767578       1.776692       0.120879       0.194000       0.122400   -9999.000000       0.579000
57251     57251     hubei          110.4197       33.0000          108       162     2012      06        10        162              0.228667      30.270233       0.720385       0.115753   -9999.000000       0.026600       0.090300       0.336000
57251     57251     hubei          110.4197       33.0000          108       162     2012      06        11        163              0.000000      29.101685       0.000000       0.119835       0.273000   -9999.000000       0.086600   -9999.000000
57251     57251     hubei          110.4197       33.0000          108       162     2012      06        12        164              0.224708      29.059662       0.000000       0.116801       0.237500   -9999.000000       0.084300       0.333000
57251     57251     hubei          110.4197       33.0000          108       162     2012      06        13        165              0.223792      30.598907       0.000000       0.110666       0.224500   -9999.000000       0.089800   -9999.000000
57251     57251     hubei          110.4197       33.0000          108       162     2012      06        14        166              0.222208      31.959351       0.000000       0.107951       0.237000   -9999.000000   -9999.000000       0.493000
57251     57251     hubei          110.4197       33.0000          108       162     2012      06        15        167              0.221208      31.326355       0.000000       0.106253   -9999.000000       0.048800   -9999.000000       0.202000
57251     57251     hubei          110.4197       33.0000          108       162     2012      06        16        168              0.220208      31.449036       1.375534       0.105285       0.244000   -9999.000000       0.078300   -9999.000000
57251     57251     hubei          110.4197       33.0000          108       162     2012      06        17        169              0.219167      30.386719       0.060460       0.115545       0.238000   -9999.000000       0.096400       0.394000
57251     57251     hubei          110.4197       33.0000          108       162     2012      06        18        170              0.218250      29.687500       0.294845       0.111054       0.254000   -9999.000000       0.110500   -9999.000000
57251     57251     hubei          110.4197       33.0000          108       162     2012      06        19        171              0.218417      29.968506       3.067480       0.109404       0.257000   -9999.000000       0.106700       0.590000
57251     57251     hubei          110.4197       33.0000          108       162     2012      06        20        172              0.218458      28.782410       1.670633       0.136258   -9999.000000       0.059600   -9999.000000   -9999.000000
57251     57251     hubei          110.4197       33.0000          108       162     2012      06        21        173              0.219083      28.495514       0.000000       0.133518       0.240000   -9999.000000       0.113300   -9999.000000
57251     57251     hubei          110.4197       33.0000          108       162     2012      06        22        174              0.219583      30.662720       0.568381       0.117383       0.232500   -9999.000000       0.116500       0.435000
57251     57251     hubei          110.4197       33.0000          108       162     2012      06        23        175              0.219417      31.674561       0.000000       0.115047       0.256000   -9999.000000       0.117600   -9999.000000
57251     57251     hubei          110.4197       33.0000          108       162     2012      06        24        176              0.218708      31.886322       1.805511       0.111769       0.231000   -9999.000000       0.113900       0.579000
57251     57251     hubei          110.4197       33.0000          108       162     2012      06        25        177              0.217792      30.573151       0.523879       0.125425   -9999.000000       0.175100   -9999.000000   -9999.000000
57251     57251     hubei          110.4197       33.0000          108       162     2012      06        26        178              0.217000      28.594269       2.191701       0.128103       0.306000   -9999.000000   -9999.000000   -9999.000000
57251     57251     hubei          110.4197       33.0000          108       162     2012      06        27        179              0.217000      26.757477       1.108581       0.136537       0.367000   -9999.000000       0.072300       0.940000
57251     57251     hubei          110.4197       33.0000          108       162     2012      06        28        180              0.217000      26.005493       0.828590       0.146136       0.323000       0.144400       0.078800   -9999.000000
57251     57251     hubei          110.4197       33.0000          108       162     2012      06        29        181              0.218167      25.422241       6.921700       0.153235       0.295000   -9999.000000       0.075200       0.737000
57251     57251     hubei          110.4197       33.0000          108       162     2012      06        30        182              0.234083      26.003906      14.166255       0.196630   -9999.000000       0.061900       0.074500   -9999.000000
57251     57251     hubei          110.4197       33.0000          108       162     2012      07        01        183              0.242409      24.450378       1.790393       0.265239   -9999.000000   -9999.000000   -9999.000000       0.747000
57251     57251     hubei          110.4197       33.0000          108       162     2012      07        02        184              0.246083      25.090790      10.571202       0.235178       0.297000       0.203900       0.053300       0.822000
57251     57251     hubei          110.4197       33.0000          108       162     2012      07        03        185              0.248833      25.107574      11.052915       0.269868   -9999.000000       0.220300       0.030700   -9999.000000
57251     57251     hubei          110.4197       33.0000          108       162     2012      07        04        186              0.252583      26.083099      25.904278       0.266403       0.291000   -9999.000000       0.055400       0.929000
57251     57251     hubei          110.4197       33.0000          108       162     2012      07        05        187              0.250708      24.885956       0.511272       0.312681       0.256000       0.118900       0.054600   -9999.000000
57251     57251     hubei          110.4197       33.0000          108       162     2012      07        06        188              0.250833      27.351624       0.071626       0.268859   -9999.000000   -9999.000000       0.054000       0.645000
57251     57251     hubei          110.4197       33.0000          108       162     2012      07        07        189              0.252458      26.481842       0.247514       0.252052   -9999.000000   -9999.000000   -9999.000000   -9999.000000
57251     57251     hubei          110.4197       33.0000          108       162     2012      07        08        190              0.253208      27.792664       6.484472       0.239470       0.257000       0.029900       0.050800       0.694000
57251     57251     hubei          110.4197       33.0000          108       162     2012      07        09        191              0.261917      28.934418      17.301912       0.253362       0.261000   -9999.000000       0.107000       0.881000
57251     57251     hubei          110.4197       33.0000          108       162     2012      07        10        192              0.269375      29.158997       0.911738       0.283810       0.257000   -9999.000000       0.106700   -9999.000000
57251     57251     hubei          110.4197       33.0000          108       162     2012      07        11        193              0.267083      29.803986       1.015802       0.273548   -9999.000000   -9999.000000       0.103800       0.714000
57251     57251     hubei          110.4197       33.0000          108       162     2012      07        12        194              0.264250      30.339996       0.756632       0.252343   -9999.000000   -9999.000000   -9999.000000   -9999.000000
57251     57251     hubei          110.4197       33.0000          108       162     2012      07        13        195              0.261783      29.844818       1.796323       0.237675       0.332000       0.129600   -9999.000000       0.621000
57251     57251     hubei          110.4197       33.0000          108       162     2012      07        14        196              0.259292      28.798431       0.559211       0.234750       0.309500   -9999.000000       0.094900       0.585000
57251     57251     hubei          110.4197       33.0000          108       162     2012      07        15        197              0.255708      28.423309       0.182500       0.221355       0.307000       0.142000       0.105100   -9999.000000
57251     57251     hubei          110.4197       33.0000          108       162     2012      07        16        198              0.253583      26.837708       0.287432       0.211963       0.282000   -9999.000000       0.058500       0.517000
57251     57251     hubei          110.4197       33.0000          108       162     2012      07        17        199              0.251750      26.358704       0.000000       0.207359   -9999.000000   -9999.000000       0.061100   -9999.000000
57251     57251     hubei          110.4197       33.0000          108       162     2012      07        18        200              0.249750      26.790070       0.000000       0.198085       0.311000       0.138800   -9999.000000       0.515000
57251     57251     hubei          110.4197       33.0000          108       162     2012      07        19        201              0.247333      27.613831       0.000000       0.186801       0.271000   -9999.000000       0.057700   -9999.000000
57251     57251     hubei          110.4197       33.0000          108       162     2012      07        20        202              0.244958      28.605225       0.121045       0.175807       0.297000   -9999.000000       0.056200   -9999.000000
57251     57251     hubei          110.4197       33.0000          108       162     2012      07        21        203              0.253435      29.257172      13.722805       0.167377       0.354000   -9999.000000       0.060200       0.592000
57251     57251     hubei          110.4197       33.0000          108       162     2012      07        22        204              0.268458      29.792633       0.000000       0.205708   -9999.000000   -9999.000000       0.062300   -9999.000000
57251     57251     hubei          110.4197       33.0000          108       162     2012      07        23        205              0.262833      27.945587       0.000000       0.233365       0.394000   -9999.000000   -9999.000000       0.603000
57251     57251     hubei          110.4197       33.0000          108       162     2012      07        24        206              0.259000      29.069733       1.013388       0.206305       0.411500   -9999.000000   -9999.000000   -9999.000000
57251     57251     hubei          110.4197       33.0000          108       162     2012      07        25        207              0.256417      27.486298       0.702381       0.202041       0.411000       0.075200       0.070000   -9999.000000
57251     57251     hubei          110.4197       33.0000          108       162     2012      07        26        208              0.250958      29.517059       0.393698       0.189563       0.330000   -9999.000000       0.071900       0.610000
57251     57251     hubei          110.4197       33.0000          108       162     2012      07        27        209              0.244375      30.912018       0.000000       0.176602       0.348000   -9999.000000       0.074500   -9999.000000
57251     57251     hubei          110.4197       33.0000          108       162     2012      07        28        210              0.239083      30.680237       0.000000       0.164972       0.350000   -9999.000000       0.074800       0.549000
57251     57251     hubei          110.4197       33.0000          108       162     2012      07        29        211              0.234167      31.898102       0.083718       0.153609       0.400000   -9999.000000   -9999.000000   -9999.000000
57251     57251     hubei          110.4197       33.0000          108       162     2012      07        30        212              0.230333      33.180267       3.156193       0.145173       0.368000   -9999.000000   -9999.000000       0.454000
57251     57251     hubei          110.4197       33.0000          108       162     2012      07        31        213              0.228167      30.972839       5.251186       0.167146       0.398000       0.061000       0.078900       0.661000
57251     57251     hubei          110.4197       33.0000          108       162     2012      08        01        214              0.228000      30.135376       4.305116       0.197594       0.338000   -9999.000000       0.080900   -9999.000000
57251     57251     hubei          110.4197       33.0000          108       162     2012      08        02        215              0.226750      28.597656       0.000000       0.206534   -9999.000000   -9999.000000       0.081200       0.546000
57251     57251     hubei          110.4197       33.0000          108       162     2012      08        03        216              0.225458      29.324890       1.696777       0.187073       0.383000       0.090800       0.079400   -9999.000000
57251     57251     hubei          110.4197       33.0000          108       162     2012      08        04        217              0.224250      30.128113       1.961289       0.176387       0.333500   -9999.000000   -9999.000000       0.824000
57251     57251     hubei          110.4197       33.0000          108       162     2012      08        05        218              0.275083      29.630554      15.526864       0.182616       0.406000       0.029900       0.085300   -9999.000000
57251     57251     hubei          110.4197       33.0000          108       162     2012      08        06        219              0.279917      27.663483       0.831632       0.260784   -9999.000000   -9999.000000       0.109500       0.836000
57251     57251     hubei          110.4197       33.0000          108       162     2012      08        07        220              0.275167      27.610107       0.000000       0.250720       0.344000   -9999.000000       0.105300       0.577000
57251     57251     hubei          110.4197       33.0000          108       162     2012      08        08        221              0.268292      28.849548       0.167490       0.220908       0.379000       0.012300       0.110500   -9999.000000
57251     57251     hubei          110.4197       33.0000          108       162     2012      08        09        222              0.259583      30.101532       0.000000       0.200730       0.381000   -9999.000000   -9999.000000       0.529000
57251     57251     hubei          110.4197       33.0000          108       162     2012      08        10        223              0.251375      30.867706       0.000000       0.181644       0.361500       0.125400   -9999.000000   -9999.000000
57251     57251     hubei          110.4197       33.0000          108       162     2012      08        11        224              0.245000      30.291809       0.279081       0.166785       0.358000   -9999.000000       0.098700       0.498000
57251     57251     hubei          110.4197       33.0000          108       162     2012      08        12        225              0.241875      30.556702      15.513032       0.156172       0.308000       0.076400       0.104600       0.653000
57251     57251     hubei          110.4197       33.0000          108       162     2012      08        13        226              0.272167      31.260437       3.655048       0.199744   -9999.000000       0.101900       0.082100   -9999.000000
57251     57251     hubei          110.4197       33.0000          108       162     2012      08        14        227              0.272125      26.512543       0.437712       0.259885   -9999.000000   -9999.000000       0.076000       0.626000
57251     57251     hubei          110.4197       33.0000          108       162     2012      08        15        228              0.273333      26.530121       0.418564       0.231002       0.352000   -9999.000000   -9999.000000   -9999.000000
57251     57251     hubei          110.4197       33.0000          108       162     2012      08        16        229              0.268625      28.383270       0.078942       0.216859       0.406000   -9999.000000   -9999.000000       0.541000
57251     57251     hubei          110.4197       33.0000          108       162     2012      08        17        230              0.263833      27.578735       0.000000       0.200055       0.357000   -9999.000000       0.063700   -9999.000000
57251     57251     hubei          110.4197       33.0000          108       162     2012      08        18        231              0.256250      27.888794       0.746487       0.188168   -9999.000000       0.163900       0.073600   -9999.000000
57251     57251     hubei          110.4197       33.0000          108       162     2012      08        19        232              0.252375      28.913116       5.016095       0.176232   -9999.000000   -9999.000000       0.069000       0.868000
57251     57251     hubei          110.4197       33.0000          108       162     2012      08        20        233              0.279875      27.571381      12.868385       0.208217   -9999.000000       0.040900       0.102700   -9999.000000
57251     57251     hubei          110.4197       33.0000          108       162     2012      08        21        234              0.281833      26.329742       0.359640       0.272807       0.252500       0.070100   -9999.000000       0.742000
57251     57251     hubei          110.4197       33.0000          108       162     2012      08        22        235              0.280708      27.004425       0.166901       0.239149       0.263000   -9999.000000       0.101000   -9999.000000
57251     57251     hubei          110.4197       33.0000          108       162     2012      08        23        236              0.276417      23.624054       0.000000       0.225097       0.226000       0.045100       0.097400   -9999.000000
57251     57251     hubei          110.4197       33.0000          108       162     2012      08        24        237              0.268875      24.108856       0.000000       0.205410   -9999.000000   -9999.000000       0.097700       0.539000
57251     57251     hubei          110.4197       33.0000          108       162     2012      08        25        238              0.000000      25.340302       0.000000       0.189198       0.261000       0.062600       0.099500   -9999.000000
57251     57251     hubei          110.4197       33.0000          108       162     2012      08        26        239              0.266417      24.446564       1.210410       0.180189       0.236000       0.096000   -9999.000000       0.547000
57251     57251     hubei          110.4197       33.0000          108       162     2012      08        27        240              0.270292      25.018616       0.466882       0.174773       0.217500   -9999.000000   -9999.000000   -9999.000000
57251     57251     hubei          110.4197       33.0000          108       162     2012      08        28        241              0.270458      27.123444       1.015743       0.163356       0.219000       0.016000       0.105100       0.477000
57251     57251     hubei          110.4197       33.0000          108       162     2012      08        29        242              0.269417      28.252777       0.071923       0.153564   -9999.000000   -9999.000000       0.110500       0.562000
57251     57251     hubei          110.4197       33.0000          108       162     2012      08        30        243              0.266625      29.521027       0.738114       0.144191       0.252000       0.026300       0.112000   -9999.000000
57251     57251     hubei          110.4197       33.0000          108       162     2012      08        31        244              0.290625      29.462830      12.204762       0.142060       0.297000       0.005300       0.130100       0.784000
57251     57251     hubei          110.4197       33.0000          108       162     2012      09        01        245              0.301208      25.131256       4.230268       0.239532       0.289000   -9999.000000   -9999.000000   -9999.000000
57251     57251     hubei          110.4197       33.0000          108       162     2012      09        02        246              0.299750      24.537231       0.079833       0.229013       0.242000       0.139100       0.113100       0.550000
57251     57251     hubei          110.4197       33.0000          108       162     2012      09        03        247              0.294792      24.253723       0.000000       0.215643       0.238000   -9999.000000       0.153900       0.503000
57251     57251     hubei          110.4197       33.0000          108       162     2012      09        04        248              0.291083      25.212524       0.484448       0.192292       0.260000       0.027800       0.153500       0.608000
57251     57251     hubei          110.4197       33.0000          108       162     2012      09        05        249              0.285625      25.843750       0.288453       0.180182       0.278000   -9999.000000       0.163400       0.396000
57251     57251     hubei          110.4197       33.0000          108       162     2012      09        06        250              0.279500      26.740509       0.414431       0.168386       0.263000   -9999.000000       0.160300   -9999.000000
57251     57251     hubei          110.4197       33.0000          108       162     2012      09        07        251              0.294292      26.058411      47.159988       0.161795       0.257000   -9999.000000   -9999.000000       0.970000
57251     57251     hubei          110.4197       33.0000          108       162     2012      09        08        252              0.309708      25.737793       2.305866       0.246856       0.368000       0.232500       0.158800   -9999.000000
57251     57251     hubei          110.4197       33.0000          108       162     2012      09        09        253              0.302125      23.429871       0.455212       0.290148   -9999.000000   -9999.000000       0.160600       0.602000
57251     57251     hubei          110.4197       33.0000          108       162     2012      09        10        254              0.297250      24.316010       1.283974       0.259618       0.327000       0.129700       0.207500       0.573000
57251     57251     hubei          110.4197       33.0000          108       162     2012      09        11        255              0.309042      22.708344       7.835696       0.250710       0.220000   -9999.000000       0.200400   -9999.000000
57251     57251     hubei          110.4197       33.0000          108       162     2012      09        12        256              0.303250      21.913147       0.624471       0.278768       0.224000   -9999.000000   -9999.000000       0.599000
57251     57251     hubei          110.4197       33.0000          108       162     2012      09        13        257              0.298696      20.135468       0.000000       0.259493       0.179000   -9999.000000   -9999.000000   -9999.000000
57251     57251     hubei          110.4197       33.0000          108       162     2012      09        14        258              0.294167      21.003265       0.000000       0.242801   -9999.000000   -9999.000000       0.168800       0.430000
57251     57251     hubei          110.4197       33.0000          108       162     2012      09        15        259              0.287542      21.147949       0.030803       0.229849       0.205000       0.096000       0.179000   -9999.000000
57251     57251     hubei          110.4197       33.0000          108       162     2012      09        16        260              0.279917      21.337372       0.000000       0.219090       0.206000   -9999.000000       0.191200   -9999.000000
57251     57251     hubei          110.4197       33.0000          108       162     2012      09        17        261              0.272750      20.628052       0.000000       0.213279       0.211000       0.142600       0.199400       0.469000
57251     57251     hubei          110.4197       33.0000          108       162     2012      09        18        262              0.266417      22.120331       0.869820       0.204079       0.203500       0.042600   -9999.000000   -9999.000000
57251     57251     hubei          110.4197       33.0000          108       162     2012      09        19        263              0.264042      23.000061       0.000000       0.200371       0.180000   -9999.000000       0.214400       0.406000
57251     57251     hubei          110.4197       33.0000          108       162     2012      09        20        264              0.261667      23.613037       2.578427       0.192316   -9999.000000       0.160500       0.196800   -9999.000000
57251     57251     hubei          110.4197       33.0000          108       162     2012      09        21        265              0.258250      24.252014       0.740362       0.196642   -9999.000000   -9999.000000       0.200500   -9999.000000
57251     57251     hubei          110.4197       33.0000          108       162     2012      09        22        266              0.256000      23.323273       0.000000       0.198557       0.184000   -9999.000000       0.203800       0.505000
57251     57251     hubei          110.4197       33.0000          108       162     2012      09        23        267              0.254708      24.045868       0.138699       0.188699       0.184000       0.112800   -9999.000000   -9999.000000
57251     57251     hubei          110.4197       33.0000          108       162     2012      09        24        268              0.251792      23.833771       0.000000       0.183281       0.195000   -9999.000000   -9999.000000       0.480000
57251     57251     hubei          110.4197       33.0000          108       162     2012      09        25        269              0.250625      22.782837       2.065866       0.179145   -9999.000000   -9999.000000       0.226800   -9999.000000
57251     57251     hubei          110.4197       33.0000          108       162     2012      09        26        270              0.249750      21.905060       0.315441       0.191897       0.188000       0.103200       0.228500       0.520000
57251     57251     hubei          110.4197       33.0000          108       162     2012      09        27        271              0.249071      21.620667       0.000000       0.195249       0.181000   -9999.000000       0.238300       0.487000
57251     57251     hubei          110.4197       33.0000          108       162     2012      09        28        272              0.245063      22.996124       0.000000       0.184743       0.189500   -9999.000000       0.236300   -9999.000000
57251     57251     hubei          110.4197       33.0000          108       162     2012      09        29        273              0.243583      21.697693       0.000000       0.173167       0.178000   -9999.000000   -9999.000000       0.340000
57251     57251     hubei          110.4197       33.0000          108       162     2012      09        30        274              0.244125      21.933380       0.000000       0.166056       0.178000   -9999.000000   -9999.000000   -9999.000000
57251     57251     hubei          110.4197       33.0000          108       162     2012      10        01        275              0.241667      22.121735       0.494319       0.160836       0.192000   -9999.000000       0.157900       0.365000
57251     57251     hubei          110.4197       33.0000          108       162     2012      10        02        276              0.239042      22.687195       3.199460       0.156574       0.216000   -9999.000000       0.175400       0.734000
57251     57251     hubei          110.4197       33.0000          108       162     2012      10        03        277              0.236750      21.858093       0.000000       0.175551       0.195000       0.143000       0.168800       0.603000
57251     57251     hubei          110.4197       33.0000          108       162     2012      10        04        278              0.235958      21.725281       6.038997       0.181154       0.183500   -9999.000000       0.173700       0.346000
57251     57251     hubei          110.4197       33.0000          108       162     2012      10        05        279              0.235667      20.914642       0.000000       0.172083       0.194000       0.078900   -9999.000000   -9999.000000
57251     57251     hubei          110.4197       33.0000          108       162     2012      10        06        280              0.235000      20.669708       0.000000       0.166446   -9999.000000   -9999.000000       0.175100       0.338000
57251     57251     hubei          110.4197       33.0000          108       162     2012      10        07        281              0.235000      20.212067       0.047732       0.162470       0.211000   -9999.000000       0.168200   -9999.000000
57251     57251     hubei          110.4197       33.0000          108       162     2012      10        08        282              0.235000      19.308380       0.783081       0.161212       0.205500       0.082600       0.108000       0.422000
57251     57251     hubei          110.4197       33.0000          108       162     2012      10        09        283              0.234667      19.290070       0.000000       0.168516       0.203000   -9999.000000       0.104900       0.222000
57251     57251     hubei          110.4197       33.0000          108       162     2012      10        10        284              0.233708      20.455109       0.195993       0.162443       0.185000   -9999.000000   -9999.000000   -9999.000000
57251     57251     hubei          110.4197       33.0000          108       162     2012      10        11        285              0.233250      20.324738       0.287020       0.156238   -9999.000000       0.066600   -9999.000000       0.261000
57251     57251     hubei          110.4197       33.0000          108       162     2012      10        12        286              0.232958      19.917450       0.176470       0.152860       0.146000   -9999.000000       0.103400   -9999.000000
57251     57251     hubei          110.4197       33.0000          108       162     2012      10        13        287              0.232708      19.502808       0.000000       0.153733       0.137500       0.106400       0.112700       0.409000
57251     57251     hubei          110.4197       33.0000          108       162     2012      10        14        288              0.232000      20.545044       0.000000       0.150689       0.150000   -9999.000000       0.113200   -9999.000000
57251     57251     hubei          110.4197       33.0000          108       162     2012      10        15        289              0.232208      20.331390       5.132396       0.147399       0.178000   -9999.000000       0.205300   -9999.000000
57251     57251     hubei          110.4197       33.0000          108       162     2012      10        16        290              0.233833      18.670746       0.000000       0.193420       0.144000       0.087600   -9999.000000       0.438000
57251     57251     hubei          110.4197       33.0000          108       162     2012      10        17        291              0.233958      17.062622       0.000000       0.193337   -9999.000000   -9999.000000   -9999.000000   -9999.000000
57251     57251     hubei          110.4197       33.0000          108       162     2012      10        18        292              0.234000      17.516205       0.000000       0.179264       0.148000       0.100600       0.165100       0.332000
57251     57251     hubei          110.4197       33.0000          108       162     2012      10        19        293              0.234000      17.615662       4.508513       0.171424       0.136000       0.172000       0.173600   -9999.000000
57251     57251     hubei          110.4197       33.0000          108       162     2012      10        20        294              0.234000      17.800262       0.000000       0.165696       0.136000   -9999.000000       0.168700   -9999.000000
57251     57251     hubei          110.4197       33.0000          108       162     2012      10        21        295              0.234000      19.734406       0.841932       0.159797       0.186000       0.034900       0.189700       0.390000
57251     57251     hubei          110.4197       33.0000          108       162     2012      10        22        296              0.232750      17.449249       0.000000       0.163734   -9999.000000   -9999.000000   -9999.000000   -9999.000000
57251     57251     hubei          110.4197       33.0000          108       162     2012      10        23        297              0.235333      16.739624       5.801043       0.159512   -9999.000000       0.175300       0.153400       0.700000
57251     57251     hubei          110.4197       33.0000          108       162     2012      10        24        298              0.245208      14.446838       0.000000       0.199684   -9999.000000       0.029600       0.163500   -9999.000000
57251     57251     hubei          110.4197       33.0000          108       162     2012      10        25        299              0.000000      15.838867       0.000000       0.206972       0.209000   -9999.000000       0.153200       0.453000
57251     57251     hubei          110.4197       33.0000          108       162     2012      10        26        300              0.246333      17.163849       0.000000       0.193799       0.185000       0.095000       0.163600       0.391000
57251     57251     hubei          110.4197       33.0000          108       162     2012      10        27        301              0.244750      16.874725       0.248170       0.186207       0.177000   -9999.000000   -9999.000000   -9999.000000
57251     57251     hubei          110.4197       33.0000          108       162     2012      10        28        302              0.000000      17.904938       1.759187       0.178911   -9999.000000   -9999.000000   -9999.000000       0.286000
57251     57251     hubei          110.4197       33.0000          108       162     2012      10        29        303              0.263875      16.751923       6.225752       0.182539       0.215000   -9999.000000       0.132100   -9999.000000
57251     57251     hubei          110.4197       33.0000          108       162     2012      10        30        304              0.271875      15.198730       0.000000       0.237350       0.193000   -9999.000000       0.137500       0.373000
57251     57251     hubei          110.4197       33.0000          108       162     2012      10        31        305              0.267667      15.500031       0.000000       0.217408       0.185500   -9999.000000       0.134400   -9999.000000
57251     57251     hubei          110.4197       33.0000          108       162     2012      11        01        306              0.264208      15.009857       0.000000       0.204492       0.158000   -9999.000000       0.145900       0.483000
57251     57251     hubei          110.4197       33.0000          108       162     2012      11        02        307              0.267000      14.826355      12.256536       0.196949   -9999.000000   -9999.000000   -9999.000000       0.221000
57251     57251     hubei          110.4197       33.0000          108       162     2012      11        03        308              0.285917      15.981812       0.158746       0.218839       0.188000       0.040900       0.142500   -9999.000000
57251     57251     hubei          110.4197       33.0000          108       162     2012      11        04        309              0.283957      11.471527       0.000000       0.250727       0.169500   -9999.000000       0.131600       0.314000
57251     57251     hubei          110.4197       33.0000          108       162     2012      11        05        310              0.281708      11.154114       0.000000       0.229407       0.181000       0.325100       0.128200   -9999.000000
57251     57251     hubei          110.4197       33.0000          108       162     2012      11        06        311              0.279167      11.729156       0.341039       0.219131       0.162000   -9999.000000       0.138600       0.252000
57251     57251     hubei          110.4197       33.0000          108       162     2012      11        07        312              0.277208      12.512543       0.382333       0.212425   -9999.000000   -9999.000000       0.136100       0.266000
57251     57251     hubei          110.4197       33.0000          108       162     2012      11        08        313              0.275083      11.336060       0.000000       0.212765       0.195000       0.080500   -9999.000000   -9999.000000
57251     57251     hubei          110.4197       33.0000          108       162     2012      11        09        314              0.272167      11.778839       0.088982       0.209735       0.191500   -9999.000000       0.127000       0.184000
57251     57251     hubei          110.4197       33.0000          108       162     2012      11        10        315              0.270292      10.846832       0.000000       0.206846       0.195500       0.410500       0.125100   -9999.000000
57251     57251     hubei          110.4197       33.0000          108       162     2012      11        11        316              0.266083       9.923370       0.000000       0.202560       0.126000       0.115400       0.128500       0.211000
57251     57251     hubei          110.4197       33.0000          108       162     2012      11        12        317              0.263542      10.635406       0.000000       0.197030       0.122000   -9999.000000       0.113500   -9999.000000
57251     57251     hubei          110.4197       33.0000          108       162     2012      11        13        318              0.000000      10.118744       3.282669       0.194608   -9999.000000       0.048300   -9999.000000   -9999.000000
57251     57251     hubei          110.4197       33.0000          108       162     2012      11        14        319              0.260167      12.445160       0.000000       0.191020       0.143000   -9999.000000   -9999.000000       0.255000
57251     57251     hubei          110.4197       33.0000          108       162     2012      11        15        320              0.259750      10.359741       1.956442       0.189962       0.129000   -9999.000000       0.098700   -9999.000000
57251     57251     hubei          110.4197       33.0000          108       162     2012      11        16        321              0.258833       8.889740       0.000000       0.203638       0.121000   -9999.000000       0.109300       0.211000
57251     57251     hubei          110.4197       33.0000          108       162     2012      11        17        322              0.000000      10.172516       0.000000       0.202361       0.120000   -9999.000000       0.109600   -9999.000000
57251     57251     hubei          110.4197       33.0000          108       162     2012      11        18        323              0.257792      11.229828       0.000000       0.195867   -9999.000000       0.169500       0.114600   -9999.000000
57251     57251     hubei          110.4197       33.0000          108       162     2012      11        19        324              0.257375      11.696167       0.000000       0.191743       0.132000   -9999.000000   -9999.000000       0.247000
57251     57251     hubei          110.4197       33.0000          108       162     2012      11        20        325              0.257000      10.658722       0.000000       0.189155       0.133000   -9999.000000       0.074500   -9999.000000
57251     57251     hubei          110.4197       33.0000          108       162     2012      11        21        326              0.257042       9.642242       0.000000       0.188394       0.127000       0.024100       0.069600       0.120000
57251     57251     hubei          110.4197       33.0000          108       162     2012      11        22        327              0.256083      10.471832       0.000000       0.186626       0.126000   -9999.000000       0.076800   -9999.000000
57251     57251     hubei          110.4197       33.0000          108       162     2012      11        23        328              0.254250       9.097443       0.000000       0.183950       0.127000       0.090000       0.077800       0.131000
57251     57251     hubei          110.4197       33.0000          108       162     2012      11        24        329              0.252833       8.222870       0.455164       0.180387       0.135000       0.108500   -9999.000000       0.124000
57251     57251     hubei          110.4197       33.0000          108       162     2012      11        25        330              0.252125       6.734131       0.609235       0.180784       0.129000   -9999.000000   -9999.000000   -9999.000000
57251     57251     hubei          110.4197       33.0000          108       162     2012      11        26        331              0.250708       6.639404       0.000000       0.190346       0.119000       0.007300   -9999.000000       0.003000
57251     57251     hubei          110.4197       33.0000          108       162     2012      11        27        332              0.250667       7.248138       0.088476       0.183711       0.116500   -9999.000000       0.074700   -9999.000000
57251     57251     hubei          110.4197       33.0000          108       162     2012      11        28        333              0.249292       8.016205       0.000000       0.180919       0.130000       0.089200       0.072600       0.092000
57251     57251     hubei          110.4197       33.0000          108       162     2012      11        29        334              0.248208       6.891083       0.030424       0.178834   -9999.000000       0.149600       0.081900   -9999.000000
57251     57251     hubei          110.4197       33.0000          108       162     2012      11        30        335              0.249000       5.203949       3.991006       0.178076       0.140000   -9999.000000   -9999.000000       0.280000
57251     57251     hubei          110.4197       33.0000          108       162     2012      12        01        336              0.250083       6.592285       1.851261       0.192944       0.142000   -9999.000000   -9999.000000       0.235000
57251     57251     hubei          110.4197       33.0000          108       162     2012      12        02        337              0.250875       4.920837       0.000000       0.229352       0.129000   -9999.000000       0.069000   -9999.000000
57251     57251     hubei          110.4197       33.0000          108       162     2012      12        03        338              0.250833       6.101227       0.000000       0.215327       0.127000   -9999.000000       0.082100       0.296000
57251     57251     hubei          110.4197       33.0000          108       162     2012      12        04        339              0.250542       7.044067       0.630179       0.206854   -9999.000000       0.100100       0.075900   -9999.000000
57251     57251     hubei          110.4197       33.0000          108       162     2012      12        05        340              0.251792       5.782410       0.070674       0.203258       0.133000   -9999.000000       0.081900       0.187000
57251     57251     hubei          110.4197       33.0000          108       162     2012      12        06        341              0.252458       7.173798       0.000000       0.198185       0.123500       0.181000   -9999.000000       0.156000
57251     57251     hubei          110.4197       33.0000          108       162     2012      12        07        342              0.254542       7.736115       0.000000       0.194159       0.130500   -9999.000000       0.077700   -9999.000000
57251     57251     hubei          110.4197       33.0000          108       162     2012      12        08        343              0.254917       8.265198       0.000000       0.190041       0.129500   -9999.000000       0.074000       0.165000
57251     57251     hubei          110.4197       33.0000          108       162     2012      12        09        344              0.254000       7.098267       0.000000       0.186726       0.132000       0.045900       0.076500   -9999.000000
57251     57251     hubei          110.4197       33.0000          108       162     2012      12        10        345              0.254292       6.567291       0.000000       0.183704   -9999.000000   -9999.000000       0.057400       0.050000
57251     57251     hubei          110.4197       33.0000          108       162     2012      12        11        346              0.253500       4.670441       0.000000       0.179711   -9999.000000       0.236600   -9999.000000   -9999.000000
57251     57251     hubei          110.4197       33.0000          108       162     2012      12        12        347              0.253333       3.247009       0.000000       0.178006       0.114000       0.050900   -9999.000000   -9999.000000
57251     57251     hubei          110.4197       33.0000          108       162     2012      12        13        348              0.252958       3.223022       2.592332       0.178241       0.123000   -9999.000000       0.050800       0.241000
57251     57251     hubei          110.4197       33.0000          108       162     2012      12        14        349              0.253792       2.803619       0.213131       0.205004       0.113000   -9999.000000       0.060100   -9999.000000
57251     57251     hubei          110.4197       33.0000          108       162     2012      12        15        350              0.000000       3.978302       0.157265       0.205660   -9999.000000   -9999.000000       0.058600       0.263000
57251     57251     hubei          110.4197       33.0000          108       162     2012      12        16        351              0.255000       3.756744       0.048350       0.202409       0.115000   -9999.000000       0.057500   -9999.000000
57251     57251     hubei          110.4197       33.0000          108       162     2012      12        17        352              0.255792       4.136414       0.514748       0.200827       0.116500   -9999.000000   -9999.000000   -9999.000000
57251     57251     hubei          110.4197       33.0000          108       162     2012      12        18        353              0.256000       3.902924       0.000000       0.202946       0.121000   -9999.000000   -9999.000000       0.151000
57251     57251     hubei          110.4197       33.0000          108       162     2012      12        19        354              0.255500       3.133972       0.621134       0.195958   -9999.000000   -9999.000000       0.047600   -9999.000000
57251     57251     hubei          110.4197       33.0000          108       162     2012      12        20        355              0.000000       3.012787       0.138978       0.195395   -9999.000000   -9999.000000       0.047100       0.001000
57251     57251     hubei          110.4197       33.0000          108       162     2012      12        21        356              0.257042       1.233429       2.279281       0.183519   -9999.000000   -9999.000000       0.054200   -9999.000000
57251     57251     hubei          110.4197       33.0000          108       162     2012      12        22        357              0.257708       2.934601       0.221607       0.206596   -9999.000000       0.068500   -9999.000000       0.069000
57251     57251     hubei          110.4197       33.0000          108       162     2012      12        23        358              0.258125       3.063049       0.000000       0.193953       0.100000   -9999.000000   -9999.000000   -9999.000000
57251     57251     hubei          110.4197       33.0000          108       162     2012      12        24        359              0.258000       1.767273       0.000000       0.174361       0.091000       0.167000       0.062000   -9999.000000
57251     57251     hubei          110.4197       33.0000          108       162     2012      12        25        360              0.000000       2.288147       0.000000       0.177111   -9999.000000   -9999.000000       0.065900   -9999.000000
57251     57251     hubei          110.4197       33.0000          108       162     2012      12        26        361              0.000000       0.670624       6.594679       0.166194   -9999.000000       0.136000       0.062200   -9999.000000
57251     57251     hubei          110.4197       33.0000          108       162     2012      12        27        362              0.000000       0.726349       0.112549       0.162170   -9999.000000       0.047100       0.068500   -9999.000000
57251     57251     hubei          110.4197       33.0000          108       162     2012      12        28        363              0.000000       0.949005       0.000000       0.164927   -9999.000000   -9999.000000   -9999.000000   -9999.000000
57251     57251     hubei          110.4197       33.0000          108       162     2012      12        29        364              0.000000       1.064240       0.000000       0.169287   -9999.000000       0.311300   -9999.000000   -9999.000000
57251     57251     hubei          110.4197       33.0000          108       162     2012      12        30        365              0.000000      -0.294342       0.250292       0.148782       0.097000   -9999.000000       0.053600   -9999.000000
57251     57251     hubei          110.4197       33.0000          108       162     2012      12        31        366              0.000000       0.320312       0.000000       0.147083   -9999.000000   -9999.000000       0.071500   -9999.000000
