# Supplementary material for: Research on Fusing Multisatellite Soil Moisture Data Based on Bayesian Model Averaging
Source: Hindawi journal article supplement (doi:10.1155/2018/9310838), 2018-06-25
Supplement: f1 [file 9310838.f1.zip › 2012_sm00-10cm_daily_ZDB_ZHY_57259_366days_allin.txt]

57259     57259     hubei          110.7697       32.0297          112       163     2012      01        01        001              0.000000   -9999.000000       0.000000   -9999.000000       0.129000   -9999.000000       0.043900   -9999.000000
57259     57259     hubei          110.7697       32.0297          112       163     2012      01        02        002              0.286000       1.512970       0.170316       0.223099       0.132000   -9999.000000   -9999.000000       0.214000
57259     57259     hubei          110.7697       32.0297          112       163     2012      01        03        003              0.000000       2.847992       0.143826       0.246378   -9999.000000   -9999.000000   -9999.000000   -9999.000000
57259     57259     hubei          110.7697       32.0297          112       163     2012      01        04        004              0.285750       1.697357       0.379139       0.218160   -9999.000000   -9999.000000       0.053200   -9999.000000
57259     57259     hubei          110.7697       32.0297          112       163     2012      01        05        005              0.285583       1.497223       0.000000       0.202186   -9999.000000   -9999.000000       0.054500       0.113000
57259     57259     hubei          110.7697       32.0297          112       163     2012      01        06        006              0.285458       0.732941       0.000000       0.191657       0.137000   -9999.000000       0.054200   -9999.000000
57259     57259     hubei          110.7697       32.0297          112       163     2012      01        07        007              0.285125       1.976624       0.000000       0.210880   -9999.000000   -9999.000000       0.058700       0.039000
57259     57259     hubei          110.7697       32.0297          112       163     2012      01        08        008              0.000000       1.136505       0.000000       0.207581       0.123000   -9999.000000   -9999.000000   -9999.000000
57259     57259     hubei          110.7697       32.0297          112       163     2012      01        09        009              0.285292       2.341888       0.198528       0.229278   -9999.000000   -9999.000000   -9999.000000       0.231000
57259     57259     hubei          110.7697       32.0297          112       163     2012      01        10        010              0.285000       3.532501       0.000000       0.236702       0.123000   -9999.000000       0.033600       0.318000
57259     57259     hubei          110.7697       32.0297          112       163     2012      01        11        011              0.285000       1.935608       0.000000       0.228077       0.127000   -9999.000000       0.037300   -9999.000000
57259     57259     hubei          110.7697       32.0297          112       163     2012      01        12        012              0.285000       2.854706       0.000000       0.233677       0.119000   -9999.000000       0.038800       0.131000
57259     57259     hubei          110.7697       32.0297          112       163     2012      01        13        013              0.285000       1.724060       2.279871       0.228272       0.123000   -9999.000000   -9999.000000   -9999.000000
57259     57259     hubei          110.7697       32.0297          112       163     2012      01        14        014              0.285000       1.678375       1.608950       0.228174   -9999.000000   -9999.000000   -9999.000000       0.159000
57259     57259     hubei          110.7697       32.0297          112       163     2012      01        15        015              0.285000       1.327240       0.542978       0.221637       0.128000   -9999.000000       0.036900   -9999.000000
57259     57259     hubei          110.7697       32.0297          112       163     2012      01        16        016              0.285000       2.368500       0.000000       0.233464       0.124500   -9999.000000       0.030400   -9999.000000
57259     57259     hubei          110.7697       32.0297          112       163     2012      01        17        017              0.000000       3.275238       0.192039       0.238749   -9999.000000   -9999.000000       0.032200       0.062000
57259     57259     hubei          110.7697       32.0297          112       163     2012      01        18        018              0.285000       2.343506       1.543532       0.239631       0.130000   -9999.000000       0.033300   -9999.000000
57259     57259     hubei          110.7697       32.0297          112       163     2012      01        19        019              0.285000       3.125214       0.911053       0.241705   -9999.000000   -9999.000000   -9999.000000       0.061000
57259     57259     hubei          110.7697       32.0297          112       163     2012      01        20        020              0.285000       2.595367       1.926507       0.239947   -9999.000000   -9999.000000   -9999.000000   -9999.000000
57259     57259     hubei          110.7697       32.0297          112       163     2012      01        21        021              0.285000       2.071869       1.536696       0.241716   -9999.000000   -9999.000000       0.028500       0.014000
57259     57259     hubei          110.7697       32.0297          112       163     2012      01        22        022              0.285000       0.389740       1.443911       0.196838   -9999.000000   -9999.000000       0.030200       0.022000
57259     57259     hubei          110.7697       32.0297          112       163     2012      01        23        023              0.285000       0.052887       0.230781       0.179018   -9999.000000   -9999.000000       0.034900   -9999.000000
57259     57259     hubei          110.7697       32.0297          112       163     2012      01        24        024              0.285000       0.751251       0.084887       0.196280   -9999.000000   -9999.000000   -9999.000000       0.017000
57259     57259     hubei          110.7697       32.0297          112       163     2012      01        25        025              0.285000       0.873047       0.000000       0.192443   -9999.000000   -9999.000000   -9999.000000   -9999.000000
57259     57259     hubei          110.7697       32.0297          112       163     2012      01        26        026              0.285000       1.621552       0.000000       0.201049   -9999.000000   -9999.000000   -9999.000000       0.308000
57259     57259     hubei          110.7697       32.0297          112       163     2012      01        27        027              0.285000       2.630615       0.000000       0.220511       0.110000   -9999.000000       0.031000   -9999.000000
57259     57259     hubei          110.7697       32.0297          112       163     2012      01        28        028              0.285000       2.856873       0.000000       0.232363       0.107000   -9999.000000       0.033000   -9999.000000
57259     57259     hubei          110.7697       32.0297          112       163     2012      01        29        029              0.285000       4.066376       0.000000       0.233902       0.105000   -9999.000000       0.035200       0.241000
57259     57259     hubei          110.7697       32.0297          112       163     2012      01        30        030              0.285000       3.305542       0.000000       0.237123   -9999.000000   -9999.000000   -9999.000000   -9999.000000
57259     57259     hubei          110.7697       32.0297          112       163     2012      01        31        031              0.285000       2.735840       0.000000       0.222240       0.102000   -9999.000000   -9999.000000       0.333000
57259     57259     hubei          110.7697       32.0297          112       163     2012      02        01        032              0.285000       5.128113       0.000000       0.233161       0.108000   -9999.000000       0.041000   -9999.000000
57259     57259     hubei          110.7697       32.0297          112       163     2012      02        02        033              0.285000       1.929199       0.400294       0.228077       0.107000   -9999.000000       0.040700   -9999.000000
57259     57259     hubei          110.7697       32.0297          112       163     2012      02        03        034              0.285000       2.397919       0.000000       0.212574       0.106000   -9999.000000       0.040000       0.269000
57259     57259     hubei          110.7697       32.0297          112       163     2012      02        04        035              0.285000       3.821350       0.000000       0.225655   -9999.000000   -9999.000000       0.043600   -9999.000000
57259     57259     hubei          110.7697       32.0297          112       163     2012      02        05        036              0.285000       3.077820       0.000000       0.233723       0.109000   -9999.000000   -9999.000000       0.258000
57259     57259     hubei          110.7697       32.0297          112       163     2012      02        06        037              0.285000       4.063934       0.000000       0.239472       0.096000   -9999.000000   -9999.000000   -9999.000000
57259     57259     hubei          110.7697       32.0297          112       163     2012      02        07        038              0.285000       5.522034       0.000000       0.238162   -9999.000000   -9999.000000       0.036500       0.230000
57259     57259     hubei          110.7697       32.0297          112       163     2012      02        08        039              0.285000       3.404877       0.000000       0.228090   -9999.000000   -9999.000000       0.039400       0.248000
57259     57259     hubei          110.7697       32.0297          112       163     2012      02        09        040              0.285000       4.015564       0.000000       0.227895   -9999.000000   -9999.000000       0.037900   -9999.000000
57259     57259     hubei          110.7697       32.0297          112       163     2012      02        10        041              0.285000       1.042145       0.083196       0.199282   -9999.000000   -9999.000000       0.037700       0.039000
57259     57259     hubei          110.7697       32.0297          112       163     2012      02        11        042              0.285000       2.944611       0.000000       0.206462   -9999.000000   -9999.000000   -9999.000000   -9999.000000
57259     57259     hubei          110.7697       32.0297          112       163     2012      02        12        043              0.285000       4.254547       0.000000       0.222685   -9999.000000   -9999.000000   -9999.000000       0.170000
57259     57259     hubei          110.7697       32.0297          112       163     2012      02        13        044              0.284958       2.883026       0.000000       0.221156   -9999.000000   -9999.000000   -9999.000000   -9999.000000
57259     57259     hubei          110.7697       32.0297          112       163     2012      02        14        045              0.284875       2.200043       0.000000       0.217820       0.110000   -9999.000000       0.034500   -9999.000000
57259     57259     hubei          110.7697       32.0297          112       163     2012      02        15        046              0.285000       2.388977       0.000000       0.225554   -9999.000000   -9999.000000       0.033600       0.054000
57259     57259     hubei          110.7697       32.0297          112       163     2012      02        16        047              0.284792       3.042877       0.093440       0.231146   -9999.000000   -9999.000000   -9999.000000   -9999.000000
57259     57259     hubei          110.7697       32.0297          112       163     2012      02        17        048              0.284542       3.738800       0.000000       0.232519       0.117000   -9999.000000   -9999.000000       0.181000
57259     57259     hubei          110.7697       32.0297          112       163     2012      02        18        049              0.284458       3.661072       0.000000       0.225455       0.107000   -9999.000000       0.032200   -9999.000000
57259     57259     hubei          110.7697       32.0297          112       163     2012      02        19        050              0.284333       4.447693       0.000000       0.217149       0.110000   -9999.000000       0.035700       0.210000
57259     57259     hubei          110.7697       32.0297          112       163     2012      02        20        051              0.284000       5.336700       0.000000       0.226107   -9999.000000   -9999.000000       0.035500       0.236000
57259     57259     hubei          110.7697       32.0297          112       163     2012      02        21        052              0.284292       4.928650       0.000000       0.232182       0.079000   -9999.000000   -9999.000000   -9999.000000
57259     57259     hubei          110.7697       32.0297          112       163     2012      02        22        053              0.284000       8.548065       0.000000       0.231408       0.076500   -9999.000000   -9999.000000       0.378000
57259     57259     hubei          110.7697       32.0297          112       163     2012      02        23        054              0.284000      10.689697       0.085210       0.228824       0.084500   -9999.000000   -9999.000000   -9999.000000
57259     57259     hubei          110.7697       32.0297          112       163     2012      02        24        055              0.284000       4.446259       0.229232       0.229712       0.082000   -9999.000000       0.034900       0.197000
57259     57259     hubei          110.7697       32.0297          112       163     2012      02        25        056              0.284000       3.322632       0.368156       0.231117   -9999.000000   -9999.000000       0.035600   -9999.000000
57259     57259     hubei          110.7697       32.0297          112       163     2012      02        26        057              0.284000       2.479980       0.059266       0.216354   -9999.000000   -9999.000000       0.035200   -9999.000000
57259     57259     hubei          110.7697       32.0297          112       163     2012      02        27        058              0.284000       3.153107       0.128546       0.218786       0.076000   -9999.000000   -9999.000000       0.200000
57259     57259     hubei          110.7697       32.0297          112       163     2012      02        28        059              0.284000       4.375824       0.442342       0.225589       0.081000   -9999.000000   -9999.000000   -9999.000000
57259     57259     hubei          110.7697       32.0297          112       163     2012      02        29        060              0.000000   -9999.000000       0.000000   -9999.000000       0.086000   -9999.000000   -9999.000000   -9999.000000
57259     57259     hubei          110.7697       32.0297          112       163     2012      03        01        061              0.284000       5.313538       0.893980       0.228736       0.124000   -9999.000000       0.029000   -9999.000000
57259     57259     hubei          110.7697       32.0297          112       163     2012      03        02        062              0.284000       3.567444       0.253354       0.234754   -9999.000000   -9999.000000       0.031500   -9999.000000
57259     57259     hubei          110.7697       32.0297          112       163     2012      03        03        063              0.284000       4.529602       0.327573       0.235039       0.130000   -9999.000000       0.033500       0.172000
57259     57259     hubei          110.7697       32.0297          112       163     2012      03        04        064              0.284000       3.183533       0.194804       0.233540       0.140000   -9999.000000   -9999.000000   -9999.000000
57259     57259     hubei          110.7697       32.0297          112       163     2012      03        05        065              0.284000       2.145630       0.186599       0.221583       0.123000   -9999.000000   -9999.000000       0.247000
57259     57259     hubei          110.7697       32.0297          112       163     2012      03        06        066              0.284000       6.044220       0.970376       0.231525       0.125000   -9999.000000       0.041600   -9999.000000
57259     57259     hubei          110.7697       32.0297          112       163     2012      03        07        067              0.000000       6.403809       0.188273       0.232633   -9999.000000   -9999.000000       0.042700       0.303000
57259     57259     hubei          110.7697       32.0297          112       163     2012      03        08        068              0.284000       5.855042       0.307603       0.231506       0.123000   -9999.000000       0.040000       0.287000
57259     57259     hubei          110.7697       32.0297          112       163     2012      03        09        069              0.284000       4.430695       0.245459       0.233190       0.128000   -9999.000000       0.040600   -9999.000000
57259     57259     hubei          110.7697       32.0297          112       163     2012      03        10        070              0.284000       4.292358       0.335974       0.230620       0.115000   -9999.000000   -9999.000000       0.312000
57259     57259     hubei          110.7697       32.0297          112       163     2012      03        11        071              0.284000       8.713257       0.000000       0.231036       0.101000   -9999.000000   -9999.000000   -9999.000000
57259     57259     hubei          110.7697       32.0297          112       163     2012      03        12        072              0.284000       8.101837       0.297044       0.225596   -9999.000000   -9999.000000       0.039200       0.279000
57259     57259     hubei          110.7697       32.0297          112       163     2012      03        13        073              0.284000       8.191193       0.031121       0.226883       0.105000   -9999.000000       0.041100   -9999.000000
57259     57259     hubei          110.7697       32.0297          112       163     2012      03        14        074              0.284000      12.385712       1.098461       0.220698       0.099000   -9999.000000   -9999.000000   -9999.000000
57259     57259     hubei          110.7697       32.0297          112       163     2012      03        15        075              0.284000      11.983459       0.651461       0.221945       0.113500   -9999.000000       0.044500       0.372000
57259     57259     hubei          110.7697       32.0297          112       163     2012      03        16        076              0.284000       8.078644       0.878685       0.235484       0.100000   -9999.000000   -9999.000000   -9999.000000
57259     57259     hubei          110.7697       32.0297          112       163     2012      03        17        077              0.284000      11.030701       0.000000       0.229176   -9999.000000   -9999.000000       0.044600       0.445000
57259     57259     hubei          110.7697       32.0297          112       163     2012      03        18        078              0.284000      14.757904       0.000000       0.221656       0.113000   -9999.000000       0.042500   -9999.000000
57259     57259     hubei          110.7697       32.0297          112       163     2012      03        19        079              0.284000      15.024841       0.092757       0.215038       0.109000   -9999.000000       0.049600       0.255000
57259     57259     hubei          110.7697       32.0297          112       163     2012      03        20        080              0.283652       7.192444       0.990890       0.218125       0.110000   -9999.000000       0.048600       0.124000
57259     57259     hubei          110.7697       32.0297          112       163     2012      03        21        081              0.283000       7.169250       2.059917       0.219447       0.157000   -9999.000000   -9999.000000   -9999.000000
57259     57259     hubei          110.7697       32.0297          112       163     2012      03        22        082              0.283500       5.095520       0.826166       0.232951       0.145000   -9999.000000   -9999.000000       0.589000
57259     57259     hubei          110.7697       32.0297          112       163     2012      03        23        083              0.283792       6.238251       0.682548       0.237610   -9999.000000   -9999.000000       0.048400   -9999.000000
57259     57259     hubei          110.7697       32.0297          112       163     2012      03        24        084              0.283917       9.372955       0.000000       0.230249       0.129000   -9999.000000       0.044600       0.539000
57259     57259     hubei          110.7697       32.0297          112       163     2012      03        25        085              0.000000      12.452667       0.000000       0.220166       0.127000   -9999.000000       0.043800   -9999.000000
57259     57259     hubei          110.7697       32.0297          112       163     2012      03        26        086              0.283542      14.922363       0.000000       0.211404       0.122500   -9999.000000       0.058900   -9999.000000
57259     57259     hubei          110.7697       32.0297          112       163     2012      03        27        087              0.283250      16.589813       0.043249       0.204229       0.120000   -9999.000000   -9999.000000       0.504000
57259     57259     hubei          110.7697       32.0297          112       163     2012      03        28        088              0.283000      17.386108       2.021757       0.198503   -9999.000000   -9999.000000   -9999.000000   -9999.000000
57259     57259     hubei          110.7697       32.0297          112       163     2012      03        29        089              0.283000      15.360199       0.250416       0.209911   -9999.000000   -9999.000000       0.054400       0.504000
57259     57259     hubei          110.7697       32.0297          112       163     2012      03        30        090              0.283000      15.494965       0.135832       0.215884       0.120000   -9999.000000       0.059200   -9999.000000
57259     57259     hubei          110.7697       32.0297          112       163     2012      03        31        091              0.283083      14.127747       0.000000       0.210280       0.118500   -9999.000000       0.059000   -9999.000000
57259     57259     hubei          110.7697       32.0297          112       163     2012      04        01        092              0.283125      16.106812       0.000000       0.199259       0.122000   -9999.000000       0.057000       0.563000
57259     57259     hubei          110.7697       32.0297          112       163     2012      04        02        093              0.283000      18.466461       0.000000       0.189690   -9999.000000   -9999.000000   -9999.000000   -9999.000000
57259     57259     hubei          110.7697       32.0297          112       163     2012      04        03        094              0.283000      15.721649       0.000000       0.185928       0.131000   -9999.000000       0.043000       0.442000
57259     57259     hubei          110.7697       32.0297          112       163     2012      04        04        095              0.283000      16.089905       0.000000       0.180883       0.117500   -9999.000000       0.042500   -9999.000000
57259     57259     hubei          110.7697       32.0297          112       163     2012      04        05        096              0.283000      15.339294       0.520601       0.179339       0.123000   -9999.000000       0.045400       0.423000
57259     57259     hubei          110.7697       32.0297          112       163     2012      04        06        097              0.283000      17.333801       0.061739       0.174692       0.129000   -9999.000000       0.041300       0.511000
57259     57259     hubei          110.7697       32.0297          112       163     2012      04        07        098              0.283000      18.636200       0.646400       0.168965       0.124000   -9999.000000   -9999.000000   -9999.000000
57259     57259     hubei          110.7697       32.0297          112       163     2012      04        08        099              0.283000      18.252869       0.163299       0.167438       0.123000   -9999.000000   -9999.000000       0.382000
57259     57259     hubei          110.7697       32.0297          112       163     2012      04        09        100              0.283000      19.704376       0.000000       0.168301       0.133000   -9999.000000       0.063800   -9999.000000
57259     57259     hubei          110.7697       32.0297          112       163     2012      04        10        101              0.283000      18.115295       0.708277       0.166604       0.121500   -9999.000000       0.065000       0.423000
57259     57259     hubei          110.7697       32.0297          112       163     2012      04        11        102              0.283000      19.372101       1.242206       0.162746       0.154000   -9999.000000       0.061500   -9999.000000
57259     57259     hubei          110.7697       32.0297          112       163     2012      04        12        103              0.283000      18.320526       5.599070       0.165582       0.165000   -9999.000000       0.072500   -9999.000000
57259     57259     hubei          110.7697       32.0297          112       163     2012      04        13        104              0.283417      13.008453       0.028589       0.228749   -9999.000000   -9999.000000   -9999.000000       0.395000
57259     57259     hubei          110.7697       32.0297          112       163     2012      04        14        105              0.283000      16.999481       0.105772       0.208978       0.151000   -9999.000000   -9999.000000   -9999.000000
57259     57259     hubei          110.7697       32.0297          112       163     2012      04        15        106              0.283000      15.451294       0.104052       0.200799       0.148500   -9999.000000       0.060600       0.351000
57259     57259     hubei          110.7697       32.0297          112       163     2012      04        16        107              0.283000      15.287048       0.000000       0.194397       0.136500   -9999.000000       0.098600   -9999.000000
57259     57259     hubei          110.7697       32.0297          112       163     2012      04        17        108              0.283000      18.039795       0.522991       0.185400       0.152000   -9999.000000       0.106000       0.448000
57259     57259     hubei          110.7697       32.0297          112       163     2012      04        18        109              0.283000      16.964752       0.000000       0.179786   -9999.000000   -9999.000000   -9999.000000       0.374000
57259     57259     hubei          110.7697       32.0297          112       163     2012      04        19        110              0.283000      19.402832       0.560050       0.170327       0.138000   -9999.000000   -9999.000000   -9999.000000
57259     57259     hubei          110.7697       32.0297          112       163     2012      04        20        111              0.285625      21.776520       7.208309       0.161960       0.147000   -9999.000000       0.102300       0.711000
57259     57259     hubei          110.7697       32.0297          112       163     2012      04        21        112              0.285875      17.120941       0.870732       0.232960       0.234500   -9999.000000       0.103900   -9999.000000
57259     57259     hubei          110.7697       32.0297          112       163     2012      04        22        113              0.285375      20.438263       0.348926       0.214380       0.227000   -9999.000000       0.100700       0.568000
57259     57259     hubei          110.7697       32.0297          112       163     2012      04        23        114              0.285542      21.975952       9.390430       0.202392   -9999.000000   -9999.000000       0.142700   -9999.000000
57259     57259     hubei          110.7697       32.0297          112       163     2012      04        24        115              0.286000      20.608002       3.719532       0.251101       0.253000   -9999.000000   -9999.000000   -9999.000000
57259     57259     hubei          110.7697       32.0297          112       163     2012      04        25        116              0.000000      17.240356       0.000000       0.258502       0.225000   -9999.000000   -9999.000000       0.568000
57259     57259     hubei          110.7697       32.0297          112       163     2012      04        26        117              0.286000      17.479034       0.000000       0.235568       0.227000   -9999.000000       0.135200   -9999.000000
57259     57259     hubei          110.7697       32.0297          112       163     2012      04        27        118              0.286000      20.001648       0.000000       0.220206       0.204000   -9999.000000       0.131900       0.545000
57259     57259     hubei          110.7697       32.0297          112       163     2012      04        28        119              0.285583      21.747314       2.149805       0.206695       0.212000   -9999.000000       0.133200   -9999.000000
57259     57259     hubei          110.7697       32.0297          112       163     2012      04        29        120              0.285000      20.236969       0.000000       0.217422       0.262000   -9999.000000       0.144500   -9999.000000
57259     57259     hubei          110.7697       32.0297          112       163     2012      04        30        121              0.285000      19.622742       4.930371       0.212948       0.276000   -9999.000000   -9999.000000       0.895000
57259     57259     hubei          110.7697       32.0297          112       163     2012      05        01        122              0.285000      18.397095       0.128251       0.242860       0.273000   -9999.000000   -9999.000000   -9999.000000
57259     57259     hubei          110.7697       32.0297          112       163     2012      05        02        123              0.285000      18.159790       0.625863       0.231718       0.264000   -9999.000000       0.168400       0.696000
57259     57259     hubei          110.7697       32.0297          112       163     2012      05        03        124              0.285000      20.282196       0.585632       0.222808       0.261000   -9999.000000       0.176200   -9999.000000
57259     57259     hubei          110.7697       32.0297          112       163     2012      05        04        125              0.285000      19.356567       0.000000       0.223444   -9999.000000   -9999.000000       0.169500       0.625000
57259     57259     hubei          110.7697       32.0297          112       163     2012      05        05        126              0.285000      19.730713       0.000000       0.218346       0.226000   -9999.000000   -9999.000000       0.549000
57259     57259     hubei          110.7697       32.0297          112       163     2012      05        06        127              0.284500      22.259979       1.660284       0.205845       0.222000   -9999.000000   -9999.000000   -9999.000000
57259     57259     hubei          110.7697       32.0297          112       163     2012      05        07        128              0.285875      24.321655      20.091282       0.198373   -9999.000000   -9999.000000       0.123300       0.934000
57259     57259     hubei          110.7697       32.0297          112       163     2012      05        08        129              0.286000      21.165833       0.537443       0.295166       0.205000   -9999.000000       0.112600   -9999.000000
57259     57259     hubei          110.7697       32.0297          112       163     2012      05        09        130              0.286000      23.923462       0.069347       0.260238   -9999.000000       0.131000       0.116400       0.640000
57259     57259     hubei          110.7697       32.0297          112       163     2012      05        10        131              0.286000      22.249939       0.000000       0.248882       0.237000   -9999.000000       0.109500   -9999.000000
57259     57259     hubei          110.7697       32.0297          112       163     2012      05        11        132              0.286375      23.295532      12.442293       0.236956       0.374000   -9999.000000   -9999.000000   -9999.000000
57259     57259     hubei          110.7697       32.0297          112       163     2012      05        12        133              0.287000      23.184967       8.144667       0.261621       0.362000   -9999.000000   -9999.000000       0.805000
57259     57259     hubei          110.7697       32.0297          112       163     2012      05        13        134              0.287000      18.475616      15.331721       0.294376   -9999.000000   -9999.000000       0.114300   -9999.000000
57259     57259     hubei          110.7697       32.0297          112       163     2012      05        14        135              0.287000      18.479095       2.494144       0.302719   -9999.000000   -9999.000000       0.088200       0.641000
57259     57259     hubei          110.7697       32.0297          112       163     2012      05        15        136              0.287000      19.753113       0.000000       0.284647       0.312000   -9999.000000       0.082700   -9999.000000
57259     57259     hubei          110.7697       32.0297          112       163     2012      05        16        137              0.286917      20.804779       0.105132       0.269018       0.266500   -9999.000000       0.082400       0.502000
57259     57259     hubei          110.7697       32.0297          112       163     2012      05        17        138              0.286292      21.872772       0.000000       0.258202       0.279000   -9999.000000   -9999.000000       0.508000
57259     57259     hubei          110.7697       32.0297          112       163     2012      05        18        139              0.286000      23.354187       0.619942       0.248406       0.330000   -9999.000000       0.094500   -9999.000000
57259     57259     hubei          110.7697       32.0297          112       163     2012      05        19        140              0.286000      19.902374       4.596745       0.249732       0.253000   -9999.000000       0.083100       0.577000
57259     57259     hubei          110.7697       32.0297          112       163     2012      05        20        141              0.285375      22.785126       0.000000       0.240518   -9999.000000   -9999.000000       0.088300   -9999.000000
57259     57259     hubei          110.7697       32.0297          112       163     2012      05        21        142              0.285000      23.171478       0.534188       0.228708       0.500000   -9999.000000       0.086700       0.651000
57259     57259     hubei          110.7697       32.0297          112       163     2012      05        22        143              0.285000      21.981354       4.333613       0.223511       0.497000   -9999.000000   -9999.000000   -9999.000000
57259     57259     hubei          110.7697       32.0297          112       163     2012      05        23        144              0.285000      19.494843       2.658199       0.251657   -9999.000000   -9999.000000   -9999.000000   -9999.000000
57259     57259     hubei          110.7697       32.0297          112       163     2012      05        24        145              0.286792      18.593323       6.300231       0.256719       0.500000   -9999.000000       0.081300       0.789000
57259     57259     hubei          110.7697       32.0297          112       163     2012      05        25        146              0.000000      17.958252       4.039213       0.275825   -9999.000000   -9999.000000       0.085900   -9999.000000
57259     57259     hubei          110.7697       32.0297          112       163     2012      05        26        147              0.287000      17.743805       0.000000       0.275771       0.490000   -9999.000000       0.078800       0.526000
57259     57259     hubei          110.7697       32.0297          112       163     2012      05        27        148              0.286500      22.041809       1.169783       0.255775       0.484000   -9999.000000       0.086100   -9999.000000
57259     57259     hubei          110.7697       32.0297          112       163     2012      05        28        149              0.286167      22.279572      16.056890       0.247965       0.486000   -9999.000000   -9999.000000   -9999.000000
57259     57259     hubei          110.7697       32.0297          112       163     2012      05        29        150              0.287000      22.870575       5.614216       0.270585       0.500000   -9999.000000   -9999.000000       0.751000
57259     57259     hubei          110.7697       32.0297          112       163     2012      05        30        151              0.287000      20.635803       0.000000       0.297673   -9999.000000   -9999.000000       0.076000   -9999.000000
57259     57259     hubei          110.7697       32.0297          112       163     2012      05        31        152              0.286042      22.129303       1.735612       0.271481   -9999.000000   -9999.000000       0.078700   -9999.000000
57259     57259     hubei          110.7697       32.0297          112       163     2012      06        01        153              0.286000      21.189819       0.000000       0.265603       0.271000   -9999.000000       0.079900   -9999.000000
57259     57259     hubei          110.7697       32.0297          112       163     2012      06        02        154              0.286000      20.657166       0.144150       0.264594       0.270500   -9999.000000       0.078800       0.531000
57259     57259     hubei          110.7697       32.0297          112       163     2012      06        03        155              0.285917      22.264069       0.428732       0.253773       0.268000   -9999.000000   -9999.000000       0.582000
57259     57259     hubei          110.7697       32.0297          112       163     2012      06        04        156              0.285375      22.381500       0.071419       0.248078   -9999.000000   -9999.000000       0.156900   -9999.000000
57259     57259     hubei          110.7697       32.0297          112       163     2012      06        05        157              0.285000      23.067719       0.607583       0.241495       0.343000   -9999.000000       0.170300       0.807000
57259     57259     hubei          110.7697       32.0297          112       163     2012      06        06        158              0.285000      22.048676       0.000000       0.242602       0.274000   -9999.000000       0.161900   -9999.000000
57259     57259     hubei          110.7697       32.0297          112       163     2012      06        07        159              0.285000      23.669586       0.000000       0.236394       0.273000       0.014000       0.161900       0.681000
57259     57259     hubei          110.7697       32.0297          112       163     2012      06        08        160              0.285000      24.231476       0.000000       0.227941       0.262500   -9999.000000   -9999.000000   -9999.000000
57259     57259     hubei          110.7697       32.0297          112       163     2012      06        09        161              0.284542      25.672241       0.000000       0.218774       0.247000   -9999.000000   -9999.000000   -9999.000000
57259     57259     hubei          110.7697       32.0297          112       163     2012      06        10        162              0.284000      25.045868       0.000000       0.212238   -9999.000000   -9999.000000       0.154100       0.547000
57259     57259     hubei          110.7697       32.0297          112       163     2012      06        11        163              0.000000      24.098083       0.000000       0.209075       0.479000   -9999.000000       0.168500   -9999.000000
57259     57259     hubei          110.7697       32.0297          112       163     2012      06        12        164              0.284000      24.776123       0.000000       0.202393       0.471500   -9999.000000       0.150400       0.635000
57259     57259     hubei          110.7697       32.0297          112       163     2012      06        13        165              0.284000      25.924835       0.000000       0.189265       0.455000   -9999.000000       0.160300   -9999.000000
57259     57259     hubei          110.7697       32.0297          112       163     2012      06        14        166              0.284000      26.597565       0.653635       0.177522       0.487000   -9999.000000   -9999.000000       0.512000
57259     57259     hubei          110.7697       32.0297          112       163     2012      06        15        167              0.283667      26.308838       0.000000       0.168815   -9999.000000   -9999.000000   -9999.000000       0.461000
57259     57259     hubei          110.7697       32.0297          112       163     2012      06        16        168              0.283208      26.235168       0.355115       0.158159   -9999.000000   -9999.000000       0.154700   -9999.000000
57259     57259     hubei          110.7697       32.0297          112       163     2012      06        17        169              0.283000      26.580872       0.608335       0.150509       0.461500   -9999.000000       0.166500       0.590000
57259     57259     hubei          110.7697       32.0297          112       163     2012      06        18        170              0.283000      26.424774       0.071282       0.146064       0.474500   -9999.000000       0.181500   -9999.000000
57259     57259     hubei          110.7697       32.0297          112       163     2012      06        19        171              0.283458      26.834198       4.245924       0.138641       0.473000       0.062200       0.174400       0.699000
57259     57259     hubei          110.7697       32.0297          112       163     2012      06        20        172              0.284000      27.612427       0.000000       0.164092   -9999.000000   -9999.000000   -9999.000000   -9999.000000
57259     57259     hubei          110.7697       32.0297          112       163     2012      06        21        173              0.284000      27.161346       0.503662       0.171928       0.317000   -9999.000000       0.187000   -9999.000000
57259     57259     hubei          110.7697       32.0297          112       163     2012      06        22        174              0.284000      27.803009       0.000000       0.157214       0.286000   -9999.000000       0.180600       0.688000
57259     57259     hubei          110.7697       32.0297          112       163     2012      06        23        175              0.283542      28.508118       0.211390       0.143246       0.306000   -9999.000000       0.190700   -9999.000000
57259     57259     hubei          110.7697       32.0297          112       163     2012      06        24        176              0.283000      29.273804       0.882381       0.130727       0.288000   -9999.000000       0.185300       0.610000
57259     57259     hubei          110.7697       32.0297          112       163     2012      06        25        177              0.283000      29.167023       2.252155       0.129906       0.318000   -9999.000000   -9999.000000   -9999.000000
57259     57259     hubei          110.7697       32.0297          112       163     2012      06        26        178              0.283000      27.290985       1.245464       0.136293       0.402000   -9999.000000   -9999.000000   -9999.000000
57259     57259     hubei          110.7697       32.0297          112       163     2012      06        27        179              0.283000      25.130066       1.765353       0.167827       0.395000   -9999.000000       0.111300       0.943000
57259     57259     hubei          110.7697       32.0297          112       163     2012      06        28        180              0.283000      24.097748       1.115979       0.178065       0.406500   -9999.000000       0.104800   -9999.000000
57259     57259     hubei          110.7697       32.0297          112       163     2012      06        29        181              0.283125      24.310211       8.137492       0.183696       0.355000   -9999.000000       0.098900       0.651000
57259     57259     hubei          110.7697       32.0297          112       163     2012      06        30        182              0.284000      25.857483       8.659100       0.212646   -9999.000000   -9999.000000       0.108900   -9999.000000
57259     57259     hubei          110.7697       32.0297          112       163     2012      07        01        183              0.284955      24.433319       5.193274       0.257453   -9999.000000   -9999.000000   -9999.000000       0.995000
57259     57259     hubei          110.7697       32.0297          112       163     2012      07        02        184              0.285000      24.598663       0.363174       0.266062       0.500000   -9999.000000   -9999.000000       0.653000
57259     57259     hubei          110.7697       32.0297          112       163     2012      07        03        185              0.285417      26.802246      12.679416       0.238511       0.489500   -9999.000000       0.166700   -9999.000000
57259     57259     hubei          110.7697       32.0297          112       163     2012      07        04        186              0.286000      26.878815      16.023388       0.265584       0.490000   -9999.000000       0.187000       0.915000
57259     57259     hubei          110.7697       32.0297          112       163     2012      07        05        187              0.286000      26.812469       0.161746       0.290112       0.495000   -9999.000000       0.186800   -9999.000000
57259     57259     hubei          110.7697       32.0297          112       163     2012      07        06        188              0.286000      26.721375       0.000000       0.280611   -9999.000000   -9999.000000       0.178500       0.769000
57259     57259     hubei          110.7697       32.0297          112       163     2012      07        07        189              0.285292      26.643677       0.000000       0.260865   -9999.000000   -9999.000000   -9999.000000   -9999.000000
57259     57259     hubei          110.7697       32.0297          112       163     2012      07        08        190              0.285000      28.689301       3.444428       0.247972       0.447500   -9999.000000       0.173200   -9999.000000
57259     57259     hubei          110.7697       32.0297          112       163     2012      07        09        191              0.285417      30.022217      22.441635       0.236277       0.472000   -9999.000000       0.091300       0.659000
57259     57259     hubei          110.7697       32.0297          112       163     2012      07        10        192              0.286000      30.362793       0.667458       0.289913   -9999.000000   -9999.000000       0.092500   -9999.000000
57259     57259     hubei          110.7697       32.0297          112       163     2012      07        11        193              0.286000      27.808228       0.134406       0.283722   -9999.000000   -9999.000000       0.088400       0.753000
57259     57259     hubei          110.7697       32.0297          112       163     2012      07        12        194              0.286000      28.576111       0.430686       0.262715       0.500000   -9999.000000   -9999.000000   -9999.000000
57259     57259     hubei          110.7697       32.0297          112       163     2012      07        13        195              0.286000      27.531616       2.875749       0.253525       0.499000   -9999.000000   -9999.000000       0.684000
57259     57259     hubei          110.7697       32.0297          112       163     2012      07        14        196              0.285958      25.970184       0.049074       0.260621       0.496500   -9999.000000       0.087000       0.590000
57259     57259     hubei          110.7697       32.0297          112       163     2012      07        15        197              0.285000      27.403137       1.887987       0.245890       0.499500   -9999.000000       0.091400   -9999.000000
57259     57259     hubei          110.7697       32.0297          112       163     2012      07        16        198              0.285000      26.788452       0.201419       0.248001       0.475000   -9999.000000       0.084200       0.661000
57259     57259     hubei          110.7697       32.0297          112       163     2012      07        17        199              0.284250      26.609314       0.204246       0.238697   -9999.000000   -9999.000000       0.087100   -9999.000000
57259     57259     hubei          110.7697       32.0297          112       163     2012      07        18        200              0.284000      26.739929       0.000000       0.230197       0.500000   -9999.000000   -9999.000000       0.616000
57259     57259     hubei          110.7697       32.0297          112       163     2012      07        19        201              0.284000      27.167603       0.000000       0.220344       0.495500   -9999.000000   -9999.000000   -9999.000000
57259     57259     hubei          110.7697       32.0297          112       163     2012      07        20        202              0.284000      28.152771       0.657744       0.210461       0.497000   -9999.000000       0.084300   -9999.000000
57259     57259     hubei          110.7697       32.0297          112       163     2012      07        21        203              0.284000      28.802795       3.430454       0.205977       0.500000   -9999.000000       0.093300       0.690000
57259     57259     hubei          110.7697       32.0297          112       163     2012      07        22        204              0.284000      30.068024       0.044820       0.208385   -9999.000000   -9999.000000       0.085000   -9999.000000
57259     57259     hubei          110.7697       32.0297          112       163     2012      07        23        205              0.284000      27.958435       0.423176       0.215285       0.500000   -9999.000000   -9999.000000       0.595000
57259     57259     hubei          110.7697       32.0297          112       163     2012      07        24        206              0.126333      28.696716       0.593228       0.197367       0.500000   -9999.000000   -9999.000000   -9999.000000
57259     57259     hubei          110.7697       32.0297          112       163     2012      07        25        207              0.110167      27.388214       0.204668       0.199683       0.500000   -9999.000000       0.119300   -9999.000000
57259     57259     hubei          110.7697       32.0297          112       163     2012      07        26        208              0.100125      29.613373       0.514149       0.187700       0.499500   -9999.000000       0.123300       0.655000
57259     57259     hubei          110.7697       32.0297          112       163     2012      07        27        209              0.087375      30.499908       0.727441       0.171441       0.500000   -9999.000000       0.127500   -9999.000000
57259     57259     hubei          110.7697       32.0297          112       163     2012      07        28        210              0.077667      30.114258       0.000000       0.156774   -9999.000000   -9999.000000       0.121300       0.653000
57259     57259     hubei          110.7697       32.0297          112       163     2012      07        29        211              0.070000      31.293701       0.176807       0.145126       0.500000   -9999.000000   -9999.000000   -9999.000000
57259     57259     hubei          110.7697       32.0297          112       163     2012      07        30        212              0.219583      32.317993       4.717579       0.137472       0.500000   -9999.000000   -9999.000000       0.541000
57259     57259     hubei          110.7697       32.0297          112       163     2012      07        31        213              0.293875      30.658173       1.250270       0.176476       0.500000   -9999.000000       0.163100       0.909000
57259     57259     hubei          110.7697       32.0297          112       163     2012      08        01        214              0.275125      29.209778       0.230353       0.182852       0.494000   -9999.000000       0.172300   -9999.000000
57259     57259     hubei          110.7697       32.0297          112       163     2012      08        02        215              0.235292      29.642029       2.174110       0.166904   -9999.000000   -9999.000000       0.153600       0.513000
57259     57259     hubei          110.7697       32.0297          112       163     2012      08        03        216              0.190292      29.380219       0.000000       0.149332       0.496000   -9999.000000       0.152400   -9999.000000
57259     57259     hubei          110.7697       32.0297          112       163     2012      08        04        217              0.191792      29.799805      12.762037       0.136173       0.491000   -9999.000000   -9999.000000       0.916000
57259     57259     hubei          110.7697       32.0297          112       163     2012      08        05        218              0.317708      28.961060      19.823650       0.165495   -9999.000000   -9999.000000       0.183300   -9999.000000
57259     57259     hubei          110.7697       32.0297          112       163     2012      08        06        219              0.307542      26.404388       0.970114       0.293109       0.498000   -9999.000000       0.125100   -9999.000000
57259     57259     hubei          110.7697       32.0297          112       163     2012      08        07        220              0.281292      27.055115       0.000000       0.264105       0.453000   -9999.000000       0.117300       0.594000
57259     57259     hubei          110.7697       32.0297          112       163     2012      08        08        221              0.248125      28.192352       0.000000       0.240311       0.500000   -9999.000000       0.111800   -9999.000000
57259     57259     hubei          110.7697       32.0297          112       163     2012      08        09        222              0.205792      28.488190       0.064453       0.223948       0.496000   -9999.000000   -9999.000000       0.647000
57259     57259     hubei          110.7697       32.0297          112       163     2012      08        10        223              0.168500      28.366577       1.101492       0.209044       0.495500   -9999.000000   -9999.000000   -9999.000000
57259     57259     hubei          110.7697       32.0297          112       163     2012      08        11        224              0.140458      28.130005       0.000000       0.196609       0.497000   -9999.000000       0.118600       0.636000
57259     57259     hubei          110.7697       32.0297          112       163     2012      08        12        225              0.114542      28.835785       1.500479       0.183276       0.484000   -9999.000000       0.121900       0.501000
57259     57259     hubei          110.7697       32.0297          112       163     2012      08        13        226              0.100417      30.085205       0.181730       0.170661   -9999.000000   -9999.000000       0.087200   -9999.000000
57259     57259     hubei          110.7697       32.0297          112       163     2012      08        14        227              0.088500      27.520691       2.747229       0.164877       0.500000   -9999.000000       0.088700       0.620000
57259     57259     hubei          110.7697       32.0297          112       163     2012      08        15        228              0.100208      27.616516       4.810587       0.165879       0.500000   -9999.000000   -9999.000000   -9999.000000
57259     57259     hubei          110.7697       32.0297          112       163     2012      08        16        229              0.094458      27.100739       0.000000       0.232287       0.500000   -9999.000000   -9999.000000       0.661000
57259     57259     hubei          110.7697       32.0297          112       163     2012      08        17        230              0.083292      27.358459       9.447021       0.205236       0.500000   -9999.000000       0.081500   -9999.000000
57259     57259     hubei          110.7697       32.0297          112       163     2012      08        18        231              0.076167      28.944519       0.323805       0.187461   -9999.000000   -9999.000000       0.092500   -9999.000000
57259     57259     hubei          110.7697       32.0297          112       163     2012      08        19        232              0.148958      29.250214      23.842743       0.177227       0.500000   -9999.000000       0.077800       1.000000
57259     57259     hubei          110.7697       32.0297          112       163     2012      08        20        233              0.324417      28.637848      39.714600       0.261191   -9999.000000       0.088100       0.081700   -9999.000000
57259     57259     hubei          110.7697       32.0297          112       163     2012      08        21        234              0.307875      26.497986       0.558661       0.325696       0.488000   -9999.000000   -9999.000000       0.871000
57259     57259     hubei          110.7697       32.0297          112       163     2012      08        22        235              0.291958      25.373688       0.593720       0.295980       0.497500   -9999.000000       0.120100   -9999.000000
57259     57259     hubei          110.7697       32.0297          112       163     2012      08        23        236              0.273542      22.949341       0.000000       0.279612       0.470000       0.067200       0.118900   -9999.000000
57259     57259     hubei          110.7697       32.0297          112       163     2012      08        24        237              0.248958      23.222961       0.000000       0.264645   -9999.000000   -9999.000000       0.126500       0.590000
57259     57259     hubei          110.7697       32.0297          112       163     2012      08        25        238              0.000000      24.266113       0.088312       0.254162       0.500000   -9999.000000       0.113800   -9999.000000
57259     57259     hubei          110.7697       32.0297          112       163     2012      08        26        239              0.206833      24.553162       1.073171       0.247934       0.495000   -9999.000000   -9999.000000       0.592000
57259     57259     hubei          110.7697       32.0297          112       163     2012      08        27        240              0.230583      24.475525       0.000000       0.250729       0.485000   -9999.000000   -9999.000000   -9999.000000
57259     57259     hubei          110.7697       32.0297          112       163     2012      08        28        241              0.257000      25.594421       0.000000       0.240602       0.482000   -9999.000000       0.127400       0.568000
57259     57259     hubei          110.7697       32.0297          112       163     2012      08        29        242              0.257000      26.501617       0.000000       0.231152   -9999.000000   -9999.000000       0.132100       0.620000
57259     57259     hubei          110.7697       32.0297          112       163     2012      08        30        243              0.257000      27.318390       0.249913       0.222018       0.499000   -9999.000000       0.120800   -9999.000000
57259     57259     hubei          110.7697       32.0297          112       163     2012      08        31        244              0.257000      26.946381       0.303302       0.217419       0.496000   -9999.000000       0.136800       0.634000
57259     57259     hubei          110.7697       32.0297          112       163     2012      09        01        245              0.257000      26.276794       3.998689       0.215023       0.417000   -9999.000000   -9999.000000   -9999.000000
57259     57259     hubei          110.7697       32.0297          112       163     2012      09        02        246              0.257000      26.124878       0.085058       0.228464       0.397000   -9999.000000   -9999.000000       0.545000
57259     57259     hubei          110.7697       32.0297          112       163     2012      09        03        247              0.257000      23.042694       0.000000       0.232315       0.346000   -9999.000000       0.158100   -9999.000000
57259     57259     hubei          110.7697       32.0297          112       163     2012      09        04        248              0.256958      24.721008       0.000000       0.217386       0.406000   -9999.000000       0.168200   -9999.000000
57259     57259     hubei          110.7697       32.0297          112       163     2012      09        05        249              0.256375      25.068939       0.103050       0.204863       0.375000   -9999.000000       0.159900       0.501000
57259     57259     hubei          110.7697       32.0297          112       163     2012      09        06        250              0.256000      25.924255       0.872238       0.192611       0.384000   -9999.000000       0.167800   -9999.000000
57259     57259     hubei          110.7697       32.0297          112       163     2012      09        07        251              0.256042      24.530640      15.547744       0.187745       0.403000   -9999.000000   -9999.000000       0.567000
57259     57259     hubei          110.7697       32.0297          112       163     2012      09        08        252              0.257958      25.572083      17.940382       0.205931       0.448000   -9999.000000       0.174400   -9999.000000
57259     57259     hubei          110.7697       32.0297          112       163     2012      09        09        253              0.257792      23.092438       0.000000       0.314459   -9999.000000   -9999.000000       0.172200       0.601000
57259     57259     hubei          110.7697       32.0297          112       163     2012      09        10        254              0.257000      23.816345       0.273021       0.271240       0.457000       0.014900       0.188000       0.606000
57259     57259     hubei          110.7697       32.0297          112       163     2012      09        11        255              0.257833      23.329498      21.615759       0.260049       0.292000   -9999.000000       0.194000   -9999.000000
57259     57259     hubei          110.7697       32.0297          112       163     2012      09        12        256              0.258000      21.971344       3.001470       0.311696       0.300000   -9999.000000   -9999.000000       0.826000
57259     57259     hubei          110.7697       32.0297          112       163     2012      09        13        257              0.258000      20.794769       0.000000       0.294314       0.281000   -9999.000000   -9999.000000   -9999.000000
57259     57259     hubei          110.7697       32.0297          112       163     2012      09        14        258              0.257958      21.010834       0.000000       0.276078   -9999.000000   -9999.000000       0.177600       0.551000
57259     57259     hubei          110.7697       32.0297          112       163     2012      09        15        259              0.257375      20.831268       0.364581       0.265887       0.315000   -9999.000000       0.181500   -9999.000000
57259     57259     hubei          110.7697       32.0297          112       163     2012      09        16        260              0.257000      21.165680       0.000000       0.258947       0.285000   -9999.000000       0.174200   -9999.000000
57259     57259     hubei          110.7697       32.0297          112       163     2012      09        17        261              0.257000      20.653534       0.000000       0.253297       0.291500   -9999.000000       0.187000       0.532000
57259     57259     hubei          110.7697       32.0297          112       163     2012      09        18        262              0.257000      21.274811       0.000000       0.246766       0.292500   -9999.000000   -9999.000000   -9999.000000
57259     57259     hubei          110.7697       32.0297          112       163     2012      09        19        263              0.257000      21.376984       0.000000       0.241967       0.265000   -9999.000000   -9999.000000       0.503000
57259     57259     hubei          110.7697       32.0297          112       163     2012      09        20        264              0.257000      22.327789       0.428376       0.236190   -9999.000000   -9999.000000       0.182000   -9999.000000
57259     57259     hubei          110.7697       32.0297          112       163     2012      09        21        265              0.257000      22.752655       0.305873       0.232641   -9999.000000   -9999.000000       0.192900   -9999.000000
57259     57259     hubei          110.7697       32.0297          112       163     2012      09        22        266              0.257000      22.177704       0.040854       0.233116       0.266000   -9999.000000       0.192000       0.586000
57259     57259     hubei          110.7697       32.0297          112       163     2012      09        23        267              0.257000      23.099518       0.000000       0.228890       0.252500   -9999.000000   -9999.000000   -9999.000000
57259     57259     hubei          110.7697       32.0297          112       163     2012      09        24        268              0.257000      22.351227       0.000000       0.225571       0.280000   -9999.000000   -9999.000000       0.481000
57259     57259     hubei          110.7697       32.0297          112       163     2012      09        25        269              0.257000      22.425598       2.140610       0.221774   -9999.000000   -9999.000000       0.225100   -9999.000000
57259     57259     hubei          110.7697       32.0297          112       163     2012      09        26        270              0.257000      21.422546       1.694932       0.231832       0.281000   -9999.000000       0.224800       0.727000
57259     57259     hubei          110.7697       32.0297          112       163     2012      09        27        271              0.257000      20.553223       0.000000       0.244459       0.253000   -9999.000000       0.231300       0.647000
57259     57259     hubei          110.7697       32.0297          112       163     2012      09        28        272              0.257000      22.082977       0.000000       0.234132       0.260500   -9999.000000       0.209200   -9999.000000
57259     57259     hubei          110.7697       32.0297          112       163     2012      09        29        273              0.257000      20.759460       0.113170       0.223128       0.246000   -9999.000000   -9999.000000       0.446000
57259     57259     hubei          110.7697       32.0297          112       163     2012      09        30        274              0.257000      20.330505       0.000000       0.215931       0.252000   -9999.000000   -9999.000000   -9999.000000
57259     57259     hubei          110.7697       32.0297          112       163     2012      10        01        275              0.257000      19.784851       0.000000       0.210751   -9999.000000   -9999.000000       0.139500       0.502000
57259     57259     hubei          110.7697       32.0297          112       163     2012      10        02        276              0.257000      20.753387       2.628625       0.204249       0.342000   -9999.000000       0.156500   -9999.000000
57259     57259     hubei          110.7697       32.0297          112       163     2012      10        03        277              0.257000      20.880524       0.000000       0.216705       0.304000   -9999.000000       0.145500   -9999.000000
57259     57259     hubei          110.7697       32.0297          112       163     2012      10        04        278              0.257000      19.905396       0.959382       0.218286       0.310500   -9999.000000       0.143900       0.493000
57259     57259     hubei          110.7697       32.0297          112       163     2012      10        05        279              0.257000      19.181000       0.223482       0.217640       0.325000   -9999.000000   -9999.000000   -9999.000000
57259     57259     hubei          110.7697       32.0297          112       163     2012      10        06        280              0.257000      18.675049       0.325043       0.218107   -9999.000000   -9999.000000       0.152900       0.539000
57259     57259     hubei          110.7697       32.0297          112       163     2012      10        07        281              0.257000      19.138245       0.677639       0.214139       0.312000   -9999.000000       0.147600   -9999.000000
57259     57259     hubei          110.7697       32.0297          112       163     2012      10        08        282              0.257000      18.405609       1.104538       0.219269       0.326000   -9999.000000       0.135000       0.538000
57259     57259     hubei          110.7697       32.0297          112       163     2012      10        09        283              0.257000      18.241241       0.000000       0.223786       0.308000   -9999.000000       0.136600       0.470000
57259     57259     hubei          110.7697       32.0297          112       163     2012      10        10        284              0.257000      19.101837       0.000000       0.216136       0.313000   -9999.000000   -9999.000000   -9999.000000
57259     57259     hubei          110.7697       32.0297          112       163     2012      10        11        285              0.257000      19.207123       0.091569       0.209318   -9999.000000   -9999.000000   -9999.000000       0.575000
57259     57259     hubei          110.7697       32.0297          112       163     2012      10        12        286              0.257000      18.140442       1.638476       0.206906       0.192000   -9999.000000       0.140300   -9999.000000
57259     57259     hubei          110.7697       32.0297          112       163     2012      10        13        287              0.257000      17.386139       0.000000       0.220639       0.181500   -9999.000000       0.133100       0.532000
57259     57259     hubei          110.7697       32.0297          112       163     2012      10        14        288              0.257000      18.723022       0.595800       0.213045       0.204500   -9999.000000       0.130200   -9999.000000
57259     57259     hubei          110.7697       32.0297          112       163     2012      10        15        289              0.257000      18.987152       1.855387       0.206144       0.233000   -9999.000000       0.177100   -9999.000000
57259     57259     hubei          110.7697       32.0297          112       163     2012      10        16        290              0.257000      17.717804       0.563385       0.214001       0.213000   -9999.000000   -9999.000000       0.587000
57259     57259     hubei          110.7697       32.0297          112       163     2012      10        17        291              0.257000      15.794525       0.412913       0.222685   -9999.000000   -9999.000000   -9999.000000   -9999.000000
57259     57259     hubei          110.7697       32.0297          112       163     2012      10        18        292              0.257000      16.287689       0.000000       0.212078       0.196000   -9999.000000       0.161700       0.571000
57259     57259     hubei          110.7697       32.0297          112       163     2012      10        19        293              0.257000      17.860138       0.121886       0.205618       0.202000   -9999.000000       0.174700   -9999.000000
57259     57259     hubei          110.7697       32.0297          112       163     2012      10        20        294              0.257000      18.016541       0.000000       0.202356       0.177000   -9999.000000       0.172700   -9999.000000
57259     57259     hubei          110.7697       32.0297          112       163     2012      10        21        295              0.257333      19.394257       7.084047       0.198112       0.269000   -9999.000000       0.129000       0.817000
57259     57259     hubei          110.7697       32.0297          112       163     2012      10        22        296              0.257208      19.158966       0.035850       0.229799   -9999.000000   -9999.000000   -9999.000000   -9999.000000
57259     57259     hubei          110.7697       32.0297          112       163     2012      10        23        297              0.257000      16.160950       2.097374       0.229971   -9999.000000   -9999.000000       0.178400       0.548000
57259     57259     hubei          110.7697       32.0297          112       163     2012      10        24        298              0.257000      14.189423       0.000000       0.231511   -9999.000000   -9999.000000       0.174400   -9999.000000
57259     57259     hubei          110.7697       32.0297          112       163     2012      10        25        299              0.000000      14.471680       0.387949       0.231021       0.301500   -9999.000000       0.173600       0.402000
57259     57259     hubei          110.7697       32.0297          112       163     2012      10        26        300              0.257042      16.275696       0.603121       0.223498       0.279000   -9999.000000       0.173300       0.528000
57259     57259     hubei          110.7697       32.0297          112       163     2012      10        27        301              0.257000      14.816986       0.000000       0.224210       0.268000   -9999.000000   -9999.000000   -9999.000000
57259     57259     hubei          110.7697       32.0297          112       163     2012      10        28        302              0.000000      16.248901       0.064198       0.218457   -9999.000000   -9999.000000   -9999.000000       0.446000
57259     57259     hubei          110.7697       32.0297          112       163     2012      10        29        303              0.257917      16.993042      13.834231       0.215514       0.281000   -9999.000000       0.150700   -9999.000000
57259     57259     hubei          110.7697       32.0297          112       163     2012      10        30        304              0.258000      15.045959       0.000000       0.279922       0.295500   -9999.000000       0.154100       0.493000
57259     57259     hubei          110.7697       32.0297          112       163     2012      10        31        305              0.258000      14.574860       0.000000       0.257305       0.285000   -9999.000000       0.149000   -9999.000000
57259     57259     hubei          110.7697       32.0297          112       163     2012      11        01        306              0.258000      13.922546       0.000000       0.246589       0.239000   -9999.000000       0.158500   -9999.000000
57259     57259     hubei          110.7697       32.0297          112       163     2012      11        02        307              0.258000      14.444794       7.245203       0.240929   -9999.000000   -9999.000000   -9999.000000       0.433000
57259     57259     hubei          110.7697       32.0297          112       163     2012      11        03        308              0.258000      16.047699       1.624710       0.248295   -9999.000000   -9999.000000   -9999.000000   -9999.000000
57259     57259     hubei          110.7697       32.0297          112       163     2012      11        04        309              0.258000      11.645294       0.000000       0.270435       0.248500   -9999.000000       0.147800       0.543000
57259     57259     hubei          110.7697       32.0297          112       163     2012      11        05        310              0.258000      11.305634       0.000000       0.253490       0.267500   -9999.000000       0.146900   -9999.000000
57259     57259     hubei          110.7697       32.0297          112       163     2012      11        06        311              0.258000      11.761017       0.067550       0.246871       0.264000   -9999.000000       0.145200       0.486000
57259     57259     hubei          110.7697       32.0297          112       163     2012      11        07        312              0.258000      12.765076       2.993377       0.242619   -9999.000000   -9999.000000       0.156300       0.625000
57259     57259     hubei          110.7697       32.0297          112       163     2012      11        08        313              0.258000      11.289764       0.000000       0.253466       0.293000   -9999.000000   -9999.000000   -9999.000000
57259     57259     hubei          110.7697       32.0297          112       163     2012      11        09        314              0.258000      11.596161       1.258884       0.252464       0.314000   -9999.000000       0.151900       0.545000
57259     57259     hubei          110.7697       32.0297          112       163     2012      11        10        315              0.258000      10.211517       0.324784       0.254251       0.282500   -9999.000000       0.145800   -9999.000000
57259     57259     hubei          110.7697       32.0297          112       163     2012      11        11        316              0.258000      10.021088       0.000000       0.248728       0.177500   -9999.000000       0.148400       0.464000
57259     57259     hubei          110.7697       32.0297          112       163     2012      11        12        317              0.258000      10.562103       0.000000       0.243810       0.187000   -9999.000000       0.143600   -9999.000000
57259     57259     hubei          110.7697       32.0297          112       163     2012      11        13        318              0.000000      10.701477       0.000000       0.241050   -9999.000000   -9999.000000   -9999.000000   -9999.000000
57259     57259     hubei          110.7697       32.0297          112       163     2012      11        14        319              0.258000      12.362244       0.000000       0.238238       0.191000   -9999.000000   -9999.000000       0.477000
57259     57259     hubei          110.7697       32.0297          112       163     2012      11        15        320              0.258000      10.772064      13.681887       0.237039       0.186000   -9999.000000       0.134500   -9999.000000
57259     57259     hubei          110.7697       32.0297          112       163     2012      11        16        321              0.258000       8.291321       0.000000       0.291946       0.175000   -9999.000000       0.140000       0.502000
57259     57259     hubei          110.7697       32.0297          112       163     2012      11        17        322              0.000000       9.221710       0.000000       0.269422       0.175000   -9999.000000       0.142600   -9999.000000
57259     57259     hubei          110.7697       32.0297          112       163     2012      11        18        323              0.258000      10.256195       0.000000       0.260431   -9999.000000   -9999.000000       0.135400   -9999.000000
57259     57259     hubei          110.7697       32.0297          112       163     2012      11        19        324              0.258000      11.366547       0.000000       0.255482       0.202000   -9999.000000   -9999.000000       0.581000
57259     57259     hubei          110.7697       32.0297          112       163     2012      11        20        325              0.258000      11.228668       3.868765       0.251717       0.195000   -9999.000000   -9999.000000   -9999.000000
57259     57259     hubei          110.7697       32.0297          112       163     2012      11        21        326              0.258000       9.330475       0.207018       0.263477       0.171000   -9999.000000       0.082400       0.386000
57259     57259     hubei          110.7697       32.0297          112       163     2012      11        22        327              0.258000       9.263428       4.411251       0.262428       0.175000   -9999.000000       0.085100   -9999.000000
57259     57259     hubei          110.7697       32.0297          112       163     2012      11        23        328              0.258000       8.394287       2.651511       0.274447       0.171000   -9999.000000       0.080800       0.270000
57259     57259     hubei          110.7697       32.0297          112       163     2012      11        24        329              0.258000       6.839081       2.010157       0.264654   -9999.000000   -9999.000000   -9999.000000       0.477000
57259     57259     hubei          110.7697       32.0297          112       163     2012      11        25        330              0.258000       6.459503       4.184227       0.262946   -9999.000000   -9999.000000   -9999.000000   -9999.000000
57259     57259     hubei          110.7697       32.0297          112       163     2012      11        26        331              0.258000       5.687805       0.000000       0.281810       0.178000   -9999.000000   -9999.000000       0.423000
57259     57259     hubei          110.7697       32.0297          112       163     2012      11        27        332              0.258000       6.689209       0.000000       0.266848       0.164000   -9999.000000       0.092900   -9999.000000
57259     57259     hubei          110.7697       32.0297          112       163     2012      11        28        333              0.258000       7.236847       0.101270       0.262183       0.168000   -9999.000000       0.094300       0.463000
57259     57259     hubei          110.7697       32.0297          112       163     2012      11        29        334              0.258000       6.728027       0.000000       0.259480   -9999.000000   -9999.000000       0.096500   -9999.000000
57259     57259     hubei          110.7697       32.0297          112       163     2012      11        30        335              0.258000       5.461792       1.983406       0.257051       0.186000   -9999.000000   -9999.000000   -9999.000000
57259     57259     hubei          110.7697       32.0297          112       163     2012      12        01        336              0.258000       6.038544       2.722598       0.259847       0.157000   -9999.000000   -9999.000000       0.287000
57259     57259     hubei          110.7697       32.0297          112       163     2012      12        02        337              0.258000       4.459442       0.037586       0.274415       0.165000   -9999.000000       0.087200   -9999.000000
57259     57259     hubei          110.7697       32.0297          112       163     2012      12        03        338              0.258000       6.731506       0.153570       0.263343       0.152000   -9999.000000       0.069700       0.419000
57259     57259     hubei          110.7697       32.0297          112       163     2012      12        04        339              0.258000       6.708313       0.000000       0.259359   -9999.000000   -9999.000000       0.065000   -9999.000000
57259     57259     hubei          110.7697       32.0297          112       163     2012      12        05        340              0.258000       4.790802       0.000000       0.256940       0.169000   -9999.000000       0.064900       0.452000
57259     57259     hubei          110.7697       32.0297          112       163     2012      12        06        341              0.258000       6.519501       0.000000       0.254442       0.149000   -9999.000000   -9999.000000       0.326000
57259     57259     hubei          110.7697       32.0297          112       163     2012      12        07        342              0.258000       6.813934       0.000000       0.252741       0.154500   -9999.000000       0.070800   -9999.000000
57259     57259     hubei          110.7697       32.0297          112       163     2012      12        08        343              0.258000       7.259369       0.000000       0.250874       0.155000   -9999.000000       0.065000       0.383000
57259     57259     hubei          110.7697       32.0297          112       163     2012      12        09        344              0.257875       6.983124       0.073552       0.248828       0.159000   -9999.000000       0.068500   -9999.000000
57259     57259     hubei          110.7697       32.0297          112       163     2012      12        10        345              0.257458       4.920349       0.084572       0.247841   -9999.000000   -9999.000000       0.050800       0.306000
57259     57259     hubei          110.7697       32.0297          112       163     2012      12        11        346              0.257042       4.198059       0.000000       0.247375       0.153000   -9999.000000   -9999.000000   -9999.000000
57259     57259     hubei          110.7697       32.0297          112       163     2012      12        12        347              0.257000       3.633148       0.000000       0.246646       0.157500   -9999.000000   -9999.000000   -9999.000000
57259     57259     hubei          110.7697       32.0297          112       163     2012      12        13        348              0.257000       4.028015       1.571420       0.246189   -9999.000000   -9999.000000       0.051900       0.206000
57259     57259     hubei          110.7697       32.0297          112       163     2012      12        14        349              0.257000       2.711151       0.122797       0.253589       0.156000   -9999.000000       0.054300   -9999.000000
57259     57259     hubei          110.7697       32.0297          112       163     2012      12        15        350              0.000000       3.871521       0.067689       0.251506   -9999.000000   -9999.000000       0.052700       0.287000
57259     57259     hubei          110.7697       32.0297          112       163     2012      12        16        351              0.257000       4.728851       0.214250       0.250375       0.172000   -9999.000000       0.051600   -9999.000000
57259     57259     hubei          110.7697       32.0297          112       163     2012      12        17        352              0.257542       4.802155       3.201230       0.249437       0.158000   -9999.000000   -9999.000000   -9999.000000
57259     57259     hubei          110.7697       32.0297          112       163     2012      12        18        353              0.258000       3.702423       0.765960       0.264337       0.169000   -9999.000000   -9999.000000       0.445000
57259     57259     hubei          110.7697       32.0297          112       163     2012      12        19        354              0.258000       3.622040       1.634258       0.257799   -9999.000000   -9999.000000       0.049000   -9999.000000
57259     57259     hubei          110.7697       32.0297          112       163     2012      12        20        355              0.000000       2.651794       0.557265       0.252158   -9999.000000   -9999.000000       0.046800       0.257000
57259     57259     hubei          110.7697       32.0297          112       163     2012      12        21        356              0.258000       1.324799       2.664929       0.233533   -9999.000000   -9999.000000       0.047700   -9999.000000
57259     57259     hubei          110.7697       32.0297          112       163     2012      12        22        357              0.258000       1.965668       1.602784       0.245790   -9999.000000   -9999.000000   -9999.000000       0.161000
57259     57259     hubei          110.7697       32.0297          112       163     2012      12        23        358              0.258000       2.516541       0.244514       0.245864       0.147000   -9999.000000   -9999.000000       0.146000
57259     57259     hubei          110.7697       32.0297          112       163     2012      12        24        359              0.258000       2.427338       0.102555       0.230408       0.136000   -9999.000000       0.058700   -9999.000000
57259     57259     hubei          110.7697       32.0297          112       163     2012      12        25        360              0.258000       2.824005       0.140781       0.237637   -9999.000000   -9999.000000       0.056900       0.098000
57259     57259     hubei          110.7697       32.0297          112       163     2012      12        26        361              0.000000       0.965729       0.711622       0.214816   -9999.000000   -9999.000000       0.058300   -9999.000000
57259     57259     hubei          110.7697       32.0297          112       163     2012      12        27        362              0.258000       0.157715       0.410878       0.179900   -9999.000000   -9999.000000       0.054800       0.072000
57259     57259     hubei          110.7697       32.0297          112       163     2012      12        28        363              0.258000       0.785828       0.464841       0.201218   -9999.000000   -9999.000000   -9999.000000   -9999.000000
57259     57259     hubei          110.7697       32.0297          112       163     2012      12        29        364              0.000000       0.868256       2.445157       0.206429   -9999.000000   -9999.000000   -9999.000000   -9999.000000
57259     57259     hubei          110.7697       32.0297          112       163     2012      12        30        365              0.000000       0.661835       0.048314       0.203777   -9999.000000   -9999.000000       0.050400       0.003000
57259     57259     hubei          110.7697       32.0297          112       163     2012      12        31        366              0.257533       0.038605       0.123068       0.177964   -9999.000000   -9999.000000       0.052500   -9999.000000
