# Supplementary material for: Research on Fusing Multisatellite Soil Moisture Data Based on Bayesian Model Averaging
Source: Hindawi journal article supplement (doi:10.1155/2018/9310838), 2018-06-25
Supplement: f1 [file 9310838.f1.zip › 2012_sm00-10cm_daily_ZDB_ZHY_57268_366days_allin.txt]

57268     57268     hubei          111.6333       32.2692          111       167     2012      01        01        001              0.000000   -9999.000000       0.000000   -9999.000000   -9999.000000   -9999.000000       0.112500   -9999.000000
57268     57268     hubei          111.6333       32.2692          111       167     2012      01        02        002              0.303292       2.767151       0.000000       0.306892   -9999.000000       0.128900   -9999.000000       0.234000
57268     57268     hubei          111.6333       32.2692          111       167     2012      01        03        003              0.000000       3.360016       0.000000       0.322027   -9999.000000       0.335800   -9999.000000   -9999.000000
57268     57268     hubei          111.6333       32.2692          111       167     2012      01        04        004              0.293000       2.499237       0.000000       0.295231   -9999.000000   -9999.000000       0.168500   -9999.000000
57268     57268     hubei          111.6333       32.2692          111       167     2012      01        05        005              0.287957       2.210114       0.000000       0.280533   -9999.000000       0.074600       0.162700       0.153000
57268     57268     hubei          111.6333       32.2692          111       167     2012      01        06        006              0.285333       1.439117       0.528424       0.270894   -9999.000000   -9999.000000       0.175400   -9999.000000
57268     57268     hubei          111.6333       32.2692          111       167     2012      01        07        007              0.284250       2.454834       0.000000       0.287595   -9999.000000       0.194300       0.177900       0.229000
57268     57268     hubei          111.6333       32.2692          111       167     2012      01        08        008              0.000000       1.983063       0.000000       0.296942       0.107000   -9999.000000   -9999.000000   -9999.000000
57268     57268     hubei          111.6333       32.2692          111       167     2012      01        09        009              0.278958       3.162811       0.000000       0.305204   -9999.000000       0.019800   -9999.000000   -9999.000000
57268     57268     hubei          111.6333       32.2692          111       167     2012      01        10        010              0.278208       4.022217       0.000000       0.311651   -9999.000000       0.066800       0.084600       0.230000
57268     57268     hubei          111.6333       32.2692          111       167     2012      01        11        011              0.276375       2.808411       0.000000       0.306219   -9999.000000   -9999.000000       0.102400   -9999.000000
57268     57268     hubei          111.6333       32.2692          111       167     2012      01        12        012              0.274667       3.280212       0.000000       0.306440   -9999.000000       0.058900       0.091700       0.189000
57268     57268     hubei          111.6333       32.2692          111       167     2012      01        13        013              0.275333       2.066071       0.394686       0.302857   -9999.000000   -9999.000000       0.089100   -9999.000000
57268     57268     hubei          111.6333       32.2692          111       167     2012      01        14        014              0.280875       2.162842       0.435188       0.307755   -9999.000000   -9999.000000   -9999.000000       0.137000
57268     57268     hubei          111.6333       32.2692          111       167     2012      01        15        015              0.280042       2.675873       0.000000       0.312161   -9999.000000       0.177700       0.100400       0.238000
57268     57268     hubei          111.6333       32.2692          111       167     2012      01        16        016              0.278292       3.936157       0.000000       0.311793   -9999.000000   -9999.000000       0.081200   -9999.000000
57268     57268     hubei          111.6333       32.2692          111       167     2012      01        17        017              0.000000       3.139099       0.179675       0.308459   -9999.000000   -9999.000000       0.093000       0.152000
57268     57268     hubei          111.6333       32.2692          111       167     2012      01        18        018              0.290375       3.216370       1.150135       0.312692   -9999.000000       0.130600       0.088300   -9999.000000
57268     57268     hubei          111.6333       32.2692          111       167     2012      01        19        019              0.308000       2.911591       1.437021       0.319612   -9999.000000   -9999.000000   -9999.000000       0.309000
57268     57268     hubei          111.6333       32.2692          111       167     2012      01        20        020              0.375667       3.371674       7.798810       0.322026   -9999.000000       0.191600   -9999.000000       0.710000
57268     57268     hubei          111.6333       32.2692          111       167     2012      01        21        021              0.368167       2.501831       1.560092       0.336419   -9999.000000   -9999.000000       0.077200   -9999.000000
57268     57268     hubei          111.6333       32.2692          111       167     2012      01        22        022              0.368833       0.802399       4.853526       0.281619   -9999.000000       0.144100       0.080100       0.198000
57268     57268     hubei          111.6333       32.2692          111       167     2012      01        23        023              0.367667      -0.426270       1.769464       0.239833   -9999.000000       0.056000       0.107500   -9999.000000
57268     57268     hubei          111.6333       32.2692          111       167     2012      01        24        024              0.370958       0.339600       0.597330       0.255126   -9999.000000   -9999.000000   -9999.000000       0.218000
57268     57268     hubei          111.6333       32.2692          111       167     2012      01        25        025              0.364083       1.557434       0.288277       0.281941   -9999.000000       0.198600   -9999.000000   -9999.000000
57268     57268     hubei          111.6333       32.2692          111       167     2012      01        26        026              0.360750       2.477570       1.663660       0.300174   -9999.000000       0.122400   -9999.000000       0.188000
57268     57268     hubei          111.6333       32.2692          111       167     2012      01        27        027              0.358792       3.589874       0.000000       0.314603   -9999.000000       0.072000       0.097400       0.212000
57268     57268     hubei          111.6333       32.2692          111       167     2012      01        28        028              0.357250       3.561005       0.000000       0.323818   -9999.000000       0.150000       0.103300   -9999.000000
57268     57268     hubei          111.6333       32.2692          111       167     2012      01        29        029              0.365292       5.302551       0.899906       0.324223   -9999.000000   -9999.000000       0.117100       0.546000
57268     57268     hubei          111.6333       32.2692          111       167     2012      01        30        030              0.365375       2.947815       0.202818       0.324196   -9999.000000       0.141200       0.125300   -9999.000000
57268     57268     hubei          111.6333       32.2692          111       167     2012      01        31        031              0.361292       4.273804       0.000000       0.320369   -9999.000000       0.091900   -9999.000000       0.434000
57268     57268     hubei          111.6333       32.2692          111       167     2012      02        01        032              0.358458       5.525787       0.000000       0.321971   -9999.000000   -9999.000000       0.144900   -9999.000000
57268     57268     hubei          111.6333       32.2692          111       167     2012      02        02        033              0.354833       2.746948       0.000000       0.310560   -9999.000000       0.126700       0.115200   -9999.000000
57268     57268     hubei          111.6333       32.2692          111       167     2012      02        03        034              0.352250       2.491089       0.000000       0.293411       0.117000   -9999.000000       0.138500       0.267000
57268     57268     hubei          111.6333       32.2692          111       167     2012      02        04        035              0.350833       3.727448       0.000000       0.304610   -9999.000000   -9999.000000       0.130700   -9999.000000
57268     57268     hubei          111.6333       32.2692          111       167     2012      02        05        036              0.350375       2.468811       0.000000       0.312942   -9999.000000       0.195700   -9999.000000       0.354000
57268     57268     hubei          111.6333       32.2692          111       167     2012      02        06        037              0.348458       4.070892       0.000000       0.318044       0.126000   -9999.000000   -9999.000000   -9999.000000
57268     57268     hubei          111.6333       32.2692          111       167     2012      02        07        038              0.342083       6.123718       0.000000       0.316252   -9999.000000       0.122200       0.103100   -9999.000000
57268     57268     hubei          111.6333       32.2692          111       167     2012      02        08        039              0.335083       3.899719       0.000000       0.305043   -9999.000000       0.223500       0.117500       0.147000
57268     57268     hubei          111.6333       32.2692          111       167     2012      02        09        040              0.330458       4.388977       0.000000       0.305306   -9999.000000   -9999.000000       0.112300   -9999.000000
57268     57268     hubei          111.6333       32.2692          111       167     2012      02        10        041              0.323625       2.200928       0.000000       0.294360   -9999.000000       0.094400       0.104600       0.114000
57268     57268     hubei          111.6333       32.2692          111       167     2012      02        11        042              0.315583       4.600403       0.000000       0.297665   -9999.000000   -9999.000000   -9999.000000   -9999.000000
57268     57268     hubei          111.6333       32.2692          111       167     2012      02        12        043              0.311750       5.515747       0.000000       0.306927   -9999.000000       0.226500   -9999.000000       0.131000
57268     57268     hubei          111.6333       32.2692          111       167     2012      02        13        044              0.310750       3.597229       0.000000       0.302541   -9999.000000       0.234200   -9999.000000       0.277000
57268     57268     hubei          111.6333       32.2692          111       167     2012      02        14        045              0.311208       3.279144       0.000000       0.305405       0.109000   -9999.000000       0.100200   -9999.000000
57268     57268     hubei          111.6333       32.2692          111       167     2012      02        15        046              0.346292       4.023895       1.493471       0.310928   -9999.000000   -9999.000000       0.110800       0.362000
57268     57268     hubei          111.6333       32.2692          111       167     2012      02        16        047              0.350000       3.941620       0.587911       0.318782   -9999.000000   -9999.000000       0.086800   -9999.000000
57268     57268     hubei          111.6333       32.2692          111       167     2012      02        17        048              0.344458       6.189301       0.000000       0.314532   -9999.000000       0.100700   -9999.000000       0.143000
57268     57268     hubei          111.6333       32.2692          111       167     2012      02        18        049              0.337292       5.333191       0.172104       0.307834       0.112000       0.181100       0.099700       0.181000
57268     57268     hubei          111.6333       32.2692          111       167     2012      02        19        050              0.328708       5.485474       0.000000       0.302306       0.104000   -9999.000000       0.098800   -9999.000000
57268     57268     hubei          111.6333       32.2692          111       167     2012      02        20        051              0.321913       6.698608       0.114638       0.305216   -9999.000000       0.177000       0.096000       0.139000
57268     57268     hubei          111.6333       32.2692          111       167     2012      02        21        052              0.312875       5.778320       0.000000       0.307365   -9999.000000   -9999.000000   -9999.000000   -9999.000000
57268     57268     hubei          111.6333       32.2692          111       167     2012      02        22        053              0.303875       9.503326       0.000000       0.304946       0.095000       0.051700   -9999.000000       0.230000
57268     57268     hubei          111.6333       32.2692          111       167     2012      02        23        054              0.298958      11.162537       0.714719       0.302579   -9999.000000       0.073400   -9999.000000   -9999.000000
57268     57268     hubei          111.6333       32.2692          111       167     2012      02        24        055              0.297417       5.486023       0.000000       0.303434   -9999.000000   -9999.000000       0.089200       0.163000
57268     57268     hubei          111.6333       32.2692          111       167     2012      02        25        056              0.292833       4.996368       0.000000       0.304140   -9999.000000       0.052100       0.095000       0.099000
57268     57268     hubei          111.6333       32.2692          111       167     2012      02        26        057              0.285375       3.885132       0.334108       0.301878   -9999.000000       0.095500       0.093900   -9999.000000
57268     57268     hubei          111.6333       32.2692          111       167     2012      02        27        058              0.278217       5.092010       0.183730       0.301482   -9999.000000       0.247100   -9999.000000       0.148000
57268     57268     hubei          111.6333       32.2692          111       167     2012      02        28        059              0.273625       5.754272       0.000000       0.300916   -9999.000000       0.153000   -9999.000000   -9999.000000
57268     57268     hubei          111.6333       32.2692          111       167     2012      02        29        060              0.000000   -9999.000000       0.000000   -9999.000000   -9999.000000   -9999.000000   -9999.000000   -9999.000000
57268     57268     hubei          111.6333       32.2692          111       167     2012      03        01        061              0.274042       5.094666       1.033443       0.301544   -9999.000000       0.079100       0.072000   -9999.000000
57268     57268     hubei          111.6333       32.2692          111       167     2012      03        02        062              0.278625       5.315948       1.427794       0.302549   -9999.000000       0.167000       0.092100   -9999.000000
57268     57268     hubei          111.6333       32.2692          111       167     2012      03        03        063              0.353042       5.666138       3.756443       0.306029   -9999.000000       0.147400       0.088000       0.569000
57268     57268     hubei          111.6333       32.2692          111       167     2012      03        04        064              0.361583       3.790710       0.000000       0.323070   -9999.000000   -9999.000000       0.078300   -9999.000000
57268     57268     hubei          111.6333       32.2692          111       167     2012      03        05        065              0.354500       3.885071       3.046987       0.315339       0.144000   -9999.000000   -9999.000000       0.254000
57268     57268     hubei          111.6333       32.2692          111       167     2012      03        06        066              0.349292       7.565979       0.000000       0.310872       0.133000       0.066200       0.113000   -9999.000000
57268     57268     hubei          111.6333       32.2692          111       167     2012      03        07        067              0.000000       8.696075       0.000000       0.307828   -9999.000000       0.154900       0.110200   -9999.000000
57268     57268     hubei          111.6333       32.2692          111       167     2012      03        08        068              0.340208       7.997833       0.079316       0.306188   -9999.000000   -9999.000000       0.109700       0.257000
57268     57268     hubei          111.6333       32.2692          111       167     2012      03        09        069              0.334167       7.096039       0.756173       0.305140   -9999.000000       0.024600       0.103000   -9999.000000
57268     57268     hubei          111.6333       32.2692          111       167     2012      03        10        070              0.321417       7.153748       0.000000       0.303315       0.130000   -9999.000000   -9999.000000       0.147000
57268     57268     hubei          111.6333       32.2692          111       167     2012      03        11        071              0.306917      11.027008       0.000000       0.298085       0.110000       0.042800   -9999.000000   -9999.000000
57268     57268     hubei          111.6333       32.2692          111       167     2012      03        12        072              0.293208       8.222382       0.000000       0.295032   -9999.000000       0.041800       0.124400       0.104000
57268     57268     hubei          111.6333       32.2692          111       167     2012      03        13        073              0.279739       8.847321       0.000000       0.293460   -9999.000000   -9999.000000       0.139800       0.245000
57268     57268     hubei          111.6333       32.2692          111       167     2012      03        14        074              0.271000      12.778198       2.912108       0.289724       0.110000       0.066700   -9999.000000   -9999.000000
57268     57268     hubei          111.6333       32.2692          111       167     2012      03        15        075              0.356167      12.561920       7.118865       0.294760   -9999.000000   -9999.000000       0.146100       0.469000
57268     57268     hubei          111.6333       32.2692          111       167     2012      03        16        076              0.354739       8.341125       0.000000       0.336732       0.121000   -9999.000000   -9999.000000   -9999.000000
57268     57268     hubei          111.6333       32.2692          111       167     2012      03        17        077              0.356217      10.881348       0.000000       0.319715       0.096000       0.175400   -9999.000000       0.394000
57268     57268     hubei          111.6333       32.2692          111       167     2012      03        18        078              0.355208      12.323181       0.773608       0.313827   -9999.000000   -9999.000000       0.145800       0.230000
57268     57268     hubei          111.6333       32.2692          111       167     2012      03        19        079              0.357167      11.380005       0.706947       0.310663   -9999.000000       0.242100       0.197900   -9999.000000
57268     57268     hubei          111.6333       32.2692          111       167     2012      03        20        080              0.356042       6.159058       0.000000       0.315373       0.128000       0.128100       0.179600       0.122000
57268     57268     hubei          111.6333       32.2692          111       167     2012      03        21        081              0.360958       6.761047       5.340401       0.311187       0.171000   -9999.000000       0.197300   -9999.000000
57268     57268     hubei          111.6333       32.2692          111       167     2012      03        22        082              0.367917       5.675079       0.287017       0.330212       0.150000       0.162800   -9999.000000       0.495000
57268     57268     hubei          111.6333       32.2692          111       167     2012      03        23        083              0.362208       8.072021       0.000000       0.324884   -9999.000000   -9999.000000       0.173800   -9999.000000
57268     57268     hubei          111.6333       32.2692          111       167     2012      03        24        084              0.354250      11.032684       0.000000       0.314021   -9999.000000       0.132600   -9999.000000       0.121000
57268     57268     hubei          111.6333       32.2692          111       167     2012      03        25        085              0.000000      14.216644       0.000000       0.305521       0.138000       0.219200       0.174000       0.082000
57268     57268     hubei          111.6333       32.2692          111       167     2012      03        26        086              0.324250      15.889191       0.000000       0.299537       0.123500   -9999.000000       0.185200   -9999.000000
57268     57268     hubei          111.6333       32.2692          111       167     2012      03        27        087              0.311083      17.624756       0.000000       0.294742       0.125000       0.160600   -9999.000000       0.122000
57268     57268     hubei          111.6333       32.2692          111       167     2012      03        28        088              0.304833      18.530609       0.742633       0.290713   -9999.000000   -9999.000000   -9999.000000   -9999.000000
57268     57268     hubei          111.6333       32.2692          111       167     2012      03        29        089              0.307333      18.313629       0.343282       0.291441       0.122000       0.188600       0.173200       0.138000
57268     57268     hubei          111.6333       32.2692          111       167     2012      03        30        090              0.298708      18.657867       0.464418       0.291467       0.127000       0.135000       0.187400   -9999.000000
57268     57268     hubei          111.6333       32.2692          111       167     2012      03        31        091              0.282292      16.437592       0.000000       0.285492       0.129000   -9999.000000       0.192500   -9999.000000
57268     57268     hubei          111.6333       32.2692          111       167     2012      04        01        092              0.269542      18.400848       0.000000       0.273660       0.140000       0.155200       0.179000       0.012000
57268     57268     hubei          111.6333       32.2692          111       167     2012      04        02        093              0.263458      20.048676       0.000000       0.267106   -9999.000000   -9999.000000   -9999.000000   -9999.000000
57268     57268     hubei          111.6333       32.2692          111       167     2012      04        03        094              0.256208      17.419220       0.000000       0.265045       0.141000   -9999.000000       0.202900       0.193000
57268     57268     hubei          111.6333       32.2692          111       167     2012      04        04        095              0.251375      17.908875       0.000000       0.258529       0.136000       0.114100       0.171300   -9999.000000
57268     57268     hubei          111.6333       32.2692          111       167     2012      04        05        096              0.247708      17.359528       0.000000       0.256826       0.135000   -9999.000000       0.189500   -9999.000000
57268     57268     hubei          111.6333       32.2692          111       167     2012      04        06        097              0.241958      18.779022       0.000000       0.253749       0.132000       0.034800       0.167400       0.151000
57268     57268     hubei          111.6333       32.2692          111       167     2012      04        07        098              0.238542      20.798035       1.073089       0.246117       0.124000       0.069100   -9999.000000   -9999.000000
57268     57268     hubei          111.6333       32.2692          111       167     2012      04        08        099              0.234875      19.926361       0.161049       0.243761   -9999.000000       0.190300   -9999.000000       0.222000
57268     57268     hubei          111.6333       32.2692          111       167     2012      04        09        100              0.233625      22.110992       0.125007       0.236984       0.133000       0.041100       0.235300   -9999.000000
57268     57268     hubei          111.6333       32.2692          111       167     2012      04        10        101              0.233375      19.717438       0.000000       0.240970       0.135000   -9999.000000       0.251400       0.135000
57268     57268     hubei          111.6333       32.2692          111       167     2012      04        11        102              0.233500      21.362122       2.065096       0.240716       0.170500       0.115700       0.256900       0.273000
57268     57268     hubei          111.6333       32.2692          111       167     2012      04        12        103              0.313292      21.543335       9.431990       0.244314   -9999.000000   -9999.000000       0.250000   -9999.000000
57268     57268     hubei          111.6333       32.2692          111       167     2012      04        13        104              0.319958      13.902435       0.000000       0.314592   -9999.000000   -9999.000000   -9999.000000       0.071000
57268     57268     hubei          111.6333       32.2692          111       167     2012      04        14        105              0.316708      18.871979       0.042806       0.286533   -9999.000000       0.092100   -9999.000000   -9999.000000
57268     57268     hubei          111.6333       32.2692          111       167     2012      04        15        106              0.311417      16.159515       0.135782       0.281245       0.164000   -9999.000000       0.207500       0.056000
57268     57268     hubei          111.6333       32.2692          111       167     2012      04        16        107              0.302667      18.311859       0.000000       0.273971       0.159500       0.287100       0.211200       0.031000
57268     57268     hubei          111.6333       32.2692          111       167     2012      04        17        108              0.295875      20.705933       0.019403       0.265487       0.166000       0.133000       0.209400   -9999.000000
57268     57268     hubei          111.6333       32.2692          111       167     2012      04        18        109              0.288150      18.981110       0.000000       0.263698   -9999.000000   -9999.000000   -9999.000000       0.037000
57268     57268     hubei          111.6333       32.2692          111       167     2012      04        19        110              0.275696      22.375916       0.261327       0.253161       0.169000       0.183500   -9999.000000   -9999.000000
57268     57268     hubei          111.6333       32.2692          111       167     2012      04        20        111              0.341571      24.574005       0.345817       0.243502       0.178500   -9999.000000       0.235100       0.638000
57268     57268     hubei          111.6333       32.2692          111       167     2012      04        21        112              0.344917      19.094543       0.000000       0.251424       0.193500   -9999.000000       0.202400   -9999.000000
57268     57268     hubei          111.6333       32.2692          111       167     2012      04        22        113              0.341083      22.747192       0.380642       0.243331       0.174000       0.317000       0.222000       0.115000
57268     57268     hubei          111.6333       32.2692          111       167     2012      04        23        114              0.338000      24.370117       4.324463       0.235703       0.169000   -9999.000000       0.197800       0.675000
57268     57268     hubei          111.6333       32.2692          111       167     2012      04        24        115              0.365739      24.015289       3.873341       0.262378       0.237000       0.235000   -9999.000000   -9999.000000
57268     57268     hubei          111.6333       32.2692          111       167     2012      04        25        116              0.000000      19.552795       0.000000       0.291255   -9999.000000       0.216200   -9999.000000       0.138000
57268     57268     hubei          111.6333       32.2692          111       167     2012      04        26        117              0.354583      20.024963       0.000000       0.269514       0.195500       0.196800       0.205400   -9999.000000
57268     57268     hubei          111.6333       32.2692          111       167     2012      04        27        118              0.349500      23.095428       0.209440       0.251987       0.174000       0.234800   -9999.000000       0.126000
57268     57268     hubei          111.6333       32.2692          111       167     2012      04        28        119              0.342125      25.297455       2.084375       0.237726       0.170000   -9999.000000       0.214300   -9999.000000
57268     57268     hubei          111.6333       32.2692          111       167     2012      04        29        120              0.333542      24.014465       0.000000       0.241790   -9999.000000       0.160400       0.194800   -9999.000000
57268     57268     hubei          111.6333       32.2692          111       167     2012      04        30        121              0.361125      23.424835      13.193654       0.234725       0.259000       0.116600   -9999.000000       0.991000
57268     57268     hubei          111.6333       32.2692          111       167     2012      05        01        122              0.364042      20.475677       0.931374       0.308623       0.256500   -9999.000000   -9999.000000   -9999.000000
57268     57268     hubei          111.6333       32.2692          111       167     2012      05        02        123              0.358292      21.110992       0.288153       0.300721       0.222500       0.111300       0.199800       0.319000
57268     57268     hubei          111.6333       32.2692          111       167     2012      05        03        124              0.354750      24.118683       0.483868       0.282707       0.226000   -9999.000000       0.231900   -9999.000000
57268     57268     hubei          111.6333       32.2692          111       167     2012      05        04        125              0.352583      23.235474       0.323478       0.278438   -9999.000000       0.191100       0.220400   -9999.000000
57268     57268     hubei          111.6333       32.2692          111       167     2012      05        05        126              0.344417      24.941895       0.000000       0.266238       0.217000   -9999.000000       0.186900       0.359000
57268     57268     hubei          111.6333       32.2692          111       167     2012      05        06        127              0.330833      26.994019       0.000000       0.249643       0.191500   -9999.000000   -9999.000000   -9999.000000
57268     57268     hubei          111.6333       32.2692          111       167     2012      05        07        128              0.364667      28.370178      11.690387       0.237653   -9999.000000       0.207600       0.172400       0.712000
57268     57268     hubei          111.6333       32.2692          111       167     2012      05        08        129              0.359708      24.109955       1.304403       0.317458       0.190000   -9999.000000       0.151100   -9999.000000
57268     57268     hubei          111.6333       32.2692          111       167     2012      05        09        130              0.355167      27.439697       0.198012       0.290679   -9999.000000   -9999.000000       0.160700       0.523000
57268     57268     hubei          111.6333       32.2692          111       167     2012      05        10        131              0.349583      25.162262       0.461632       0.281168       0.222000   -9999.000000       0.143400       0.385000
57268     57268     hubei          111.6333       32.2692          111       167     2012      05        11        132              0.348625      27.163116      33.810638       0.265230       0.200000   -9999.000000   -9999.000000   -9999.000000
57268     57268     hubei          111.6333       32.2692          111       167     2012      05        12        133              0.372750      27.174866       8.559619       0.306012       0.277500       0.182400   -9999.000000       0.557000
57268     57268     hubei          111.6333       32.2692          111       167     2012      05        13        134              0.373750      19.722839      10.372303       0.366612       0.221000       0.132000       0.159300   -9999.000000
57268     57268     hubei          111.6333       32.2692          111       167     2012      05        14        135              0.365958      21.360229       0.000000       0.357580       0.185000   -9999.000000       0.195300       0.529000
57268     57268     hubei          111.6333       32.2692          111       167     2012      05        15        136              0.359500      22.447021       0.000000       0.341434       0.254000       0.229400       0.187700       0.433000
57268     57268     hubei          111.6333       32.2692          111       167     2012      05        16        137              0.348583      24.644196       0.000000       0.325831       0.220000   -9999.000000       0.167400   -9999.000000
57268     57268     hubei          111.6333       32.2692          111       167     2012      05        17        138              0.331292      26.422882       0.000000       0.313606       0.194000       0.255500   -9999.000000       0.319000
57268     57268     hubei          111.6333       32.2692          111       167     2012      05        18        139              0.323500      27.133362       0.212741       0.301587       0.225000       0.232000   -9999.000000   -9999.000000
57268     57268     hubei          111.6333       32.2692          111       167     2012      05        19        140              0.309542      23.415680       0.000000       0.299923       0.173000       0.060600       0.156100       0.395000
57268     57268     hubei          111.6333       32.2692          111       167     2012      05        20        141              0.291375      26.628693       0.000000       0.288829   -9999.000000       0.108500       0.191200   -9999.000000
57268     57268     hubei          111.6333       32.2692          111       167     2012      05        21        142              0.284375      26.485840       0.000000       0.274649       0.279000   -9999.000000       0.173300       0.312000
57268     57268     hubei          111.6333       32.2692          111       167     2012      05        22        143              0.287708      24.410583       0.844569       0.273510       0.302000       0.136900       0.165500       0.338000
57268     57268     hubei          111.6333       32.2692          111       167     2012      05        23        144              0.294542      22.772278       0.616130       0.280133   -9999.000000       0.102800   -9999.000000   -9999.000000
57268     57268     hubei          111.6333       32.2692          111       167     2012      05        24        145              0.307833      22.058716       1.997062       0.282796       0.282000   -9999.000000       0.188200       0.474000
57268     57268     hubei          111.6333       32.2692          111       167     2012      05        25        146              0.000000      20.902893       1.484678       0.291937   -9999.000000       0.165700       0.172500   -9999.000000
57268     57268     hubei          111.6333       32.2692          111       167     2012      05        26        147              0.310792      20.946564       0.000000       0.294630       0.286000   -9999.000000       0.169300       0.296000
57268     57268     hubei          111.6333       32.2692          111       167     2012      05        27        148              0.296292      26.403687       0.000000       0.275665       0.245500       0.208200       0.170400   -9999.000000
57268     57268     hubei          111.6333       32.2692          111       167     2012      05        28        149              0.300833      26.368866      17.985817       0.267033       0.250000       0.223200   -9999.000000   -9999.000000
57268     57268     hubei          111.6333       32.2692          111       167     2012      05        29        150              0.369292      26.782471      10.885746       0.289783       0.319000   -9999.000000   -9999.000000       0.743000
57268     57268     hubei          111.6333       32.2692          111       167     2012      05        30        151              0.354875      21.958771       0.000000       0.357951   -9999.000000       0.231400       0.167200   -9999.000000
57268     57268     hubei          111.6333       32.2692          111       167     2012      05        31        152              0.348708      26.471222       0.946445       0.323304       0.308000       0.209400       0.175400   -9999.000000
57268     57268     hubei          111.6333       32.2692          111       167     2012      06        01        153              0.359083      25.461517       0.367524       0.314858       0.214000   -9999.000000       0.195300   -9999.000000
57268     57268     hubei          111.6333       32.2692          111       167     2012      06        02        154              0.356625      23.151825       0.000000       0.313862       0.207500       0.269400       0.171100   -9999.000000
57268     57268     hubei          111.6333       32.2692          111       167     2012      06        03        155              0.354625      25.810120       0.000000       0.301600       0.199500   -9999.000000   -9999.000000       0.585000
57268     57268     hubei          111.6333       32.2692          111       167     2012      06        04        156              0.350292      25.157745       0.000000       0.295644       0.162000       0.415200   -9999.000000   -9999.000000
57268     57268     hubei          111.6333       32.2692          111       167     2012      06        05        157              0.351125      26.413910       4.876541       0.286420   -9999.000000       0.186900       0.183900       0.894000
57268     57268     hubei          111.6333       32.2692          111       167     2012      06        06        158              0.354625      25.544983       0.213290       0.305495       0.237000       0.136100       0.167800   -9999.000000
57268     57268     hubei          111.6333       32.2692          111       167     2012      06        07        159              0.346708      27.554749       0.000000       0.297198       0.214000       0.177900       0.190300       0.466000
57268     57268     hubei          111.6333       32.2692          111       167     2012      06        08        160              0.326083      28.885559       0.000000       0.281948       0.187500   -9999.000000       0.160700       0.638000
57268     57268     hubei          111.6333       32.2692          111       167     2012      06        09        161              0.303833      30.511932       0.000000       0.266154       0.170000       0.145000   -9999.000000   -9999.000000
57268     57268     hubei          111.6333       32.2692          111       167     2012      06        10        162              0.292542      30.909515       0.000000       0.253246   -9999.000000       0.250900       0.161200       0.464000
57268     57268     hubei          111.6333       32.2692          111       167     2012      06        11        163              0.000000      29.316803       0.000000       0.248905       0.256000   -9999.000000       0.138700   -9999.000000
57268     57268     hubei          111.6333       32.2692          111       167     2012      06        12        164              0.272792      29.165344       0.000000       0.241450       0.228500       0.134300       0.138000       0.446000
57268     57268     hubei          111.6333       32.2692          111       167     2012      06        13        165              0.262083      31.673218       0.000000       0.226820       0.245000   -9999.000000       0.119600       0.456000
57268     57268     hubei          111.6333       32.2692          111       167     2012      06        14        166              0.254708      32.992523       0.000000       0.216077       0.221000   -9999.000000   -9999.000000   -9999.000000
57268     57268     hubei          111.6333       32.2692          111       167     2012      06        15        167              0.247875      30.901581       0.000000       0.212827   -9999.000000       0.369100   -9999.000000       0.309000
57268     57268     hubei          111.6333       32.2692          111       167     2012      06        16        168              0.240708      31.581696       0.305215       0.206013       0.264000   -9999.000000       0.119700   -9999.000000
57268     57268     hubei          111.6333       32.2692          111       167     2012      06        17        169              0.236792      31.318970       0.000000       0.201742       0.233500       0.314200       0.138000       0.552000
57268     57268     hubei          111.6333       32.2692          111       167     2012      06        18        170              0.234708      30.952576       0.000000       0.198897       0.260500       0.285300       0.127800   -9999.000000
57268     57268     hubei          111.6333       32.2692          111       167     2012      06        19        171              0.231625      32.965546       0.349495       0.195597       0.230000   -9999.000000       0.106500       0.464000
57268     57268     hubei          111.6333       32.2692          111       167     2012      06        20        172              0.227667      33.433380       0.000000       0.194914   -9999.000000       0.143900   -9999.000000       0.332000
57268     57268     hubei          111.6333       32.2692          111       167     2012      06        21        173              0.223750      33.400696       1.327528       0.190216       0.239000   -9999.000000   -9999.000000   -9999.000000
57268     57268     hubei          111.6333       32.2692          111       167     2012      06        22        174              0.220292      34.094482       0.000000       0.187209       0.211000       0.514300       0.109300       0.488000
57268     57268     hubei          111.6333       32.2692          111       167     2012      06        23        175              0.216750      34.941162       0.000000       0.185529       0.208000       0.250100       0.122400   -9999.000000
57268     57268     hubei          111.6333       32.2692          111       167     2012      06        24        176              0.213667      35.621185       0.000000       0.183983       0.195000       0.138200       0.118000       0.473000
57268     57268     hubei          111.6333       32.2692          111       167     2012      06        25        177              0.211833      35.094971       1.587353       0.183061   -9999.000000       0.177300   -9999.000000   -9999.000000
57268     57268     hubei          111.6333       32.2692          111       167     2012      06        26        178              0.211500      32.306580       0.346068       0.184232   -9999.000000   -9999.000000   -9999.000000   -9999.000000
57268     57268     hubei          111.6333       32.2692          111       167     2012      06        27        179              0.252125      29.833160      16.744722       0.189762       0.366000       0.327000       0.091500       1.000000
57268     57268     hubei          111.6333       32.2692          111       167     2012      06        28        180              0.303958      26.178070       2.935209       0.288700       0.320500       0.343400       0.105900   -9999.000000
57268     57268     hubei          111.6333       32.2692          111       167     2012      06        29        181              0.308167      25.856201      17.757170       0.306518       0.264500   -9999.000000       0.099800       0.824000
57268     57268     hubei          111.6333       32.2692          111       167     2012      06        30        182              0.327375      28.287659      11.323157       0.304224   -9999.000000       0.210100       0.101000   -9999.000000
57268     57268     hubei          111.6333       32.2692          111       167     2012      07        01        183              0.328273      25.673004       9.494293       0.356504   -9999.000000   -9999.000000   -9999.000000   -9999.000000
57268     57268     hubei          111.6333       32.2692          111       167     2012      07        02        184              0.324292      26.470459       1.433715       0.356458       0.345000       0.330600   -9999.000000       0.888000
57268     57268     hubei          111.6333       32.2692          111       167     2012      07        03        185              0.323542      28.334167       1.394489       0.330185       0.279000       0.284700       0.080400   -9999.000000
57268     57268     hubei          111.6333       32.2692          111       167     2012      07        04        186              0.332792      29.862885      15.440540       0.318849       0.270000   -9999.000000       0.099000       0.774000
57268     57268     hubei          111.6333       32.2692          111       167     2012      07        05        187              0.346792      29.171570      14.905720       0.329737       0.263000       0.313200       0.097300   -9999.000000
57268     57268     hubei          111.6333       32.2692          111       167     2012      07        06        188              0.338833      27.564270       0.212327       0.369942   -9999.000000       0.291400       0.083700       0.780000
57268     57268     hubei          111.6333       32.2692          111       167     2012      07        07        189              0.334417      29.432709       0.000000       0.340813   -9999.000000   -9999.000000   -9999.000000       0.712000
57268     57268     hubei          111.6333       32.2692          111       167     2012      07        08        190              0.327708      31.339844       2.149879       0.327720       0.270500       0.468900       0.091400   -9999.000000
57268     57268     hubei          111.6333       32.2692          111       167     2012      07        09        191              0.313958      32.264404       6.369627       0.317663       0.267000   -9999.000000       0.113500       0.627000
57268     57268     hubei          111.6333       32.2692          111       167     2012      07        10        192              0.327375      33.210449       0.414618       0.313536       0.255500       0.332900       0.121700   -9999.000000
57268     57268     hubei          111.6333       32.2692          111       167     2012      07        11        193              0.314083      31.251770       3.693457       0.323724       0.231000       0.283200       0.101400       0.721000
57268     57268     hubei          111.6333       32.2692          111       167     2012      07        12        194              0.302167      32.804321       0.000000       0.304919   -9999.000000       0.167200   -9999.000000       0.613000
57268     57268     hubei          111.6333       32.2692          111       167     2012      07        13        195              0.328043      30.817902       8.988402       0.296367       0.310000       0.132800   -9999.000000   -9999.000000
57268     57268     hubei          111.6333       32.2692          111       167     2012      07        14        196              0.337833      28.307373       6.132351       0.331373       0.288500   -9999.000000       0.116500       0.668000
57268     57268     hubei          111.6333       32.2692          111       167     2012      07        15        197              0.331500      29.114563       1.449639       0.337325       0.279000       0.243800       0.126400   -9999.000000
57268     57268     hubei          111.6333       32.2692          111       167     2012      07        16        198              0.325292      28.749298       0.437322       0.320636       0.228000   -9999.000000       0.113800       0.642000
57268     57268     hubei          111.6333       32.2692          111       167     2012      07        17        199              0.318292      29.298798       0.746425       0.310445   -9999.000000   -9999.000000       0.109000   -9999.000000
57268     57268     hubei          111.6333       32.2692          111       167     2012      07        18        200              0.303167      29.710083       0.000000       0.301986       0.276000       0.194900   -9999.000000       0.603000
57268     57268     hubei          111.6333       32.2692          111       167     2012      07        19        201              0.281375      30.326050       0.000000       0.290966       0.260500   -9999.000000   -9999.000000       0.368000
57268     57268     hubei          111.6333       32.2692          111       167     2012      07        20        202              0.269292      31.423126       0.000000       0.278009       0.261000       0.182800       0.100800   -9999.000000
57268     57268     hubei          111.6333       32.2692          111       167     2012      07        21        203              0.259913      31.763336       4.711886       0.271831       0.309000       0.165700       0.128400       0.762000
57268     57268     hubei          111.6333       32.2692          111       167     2012      07        22        204              0.262208      32.894836       0.545791       0.273039       0.284000   -9999.000000       0.113800   -9999.000000
57268     57268     hubei          111.6333       32.2692          111       167     2012      07        23        205              0.251875      30.592285       0.824798       0.282999       0.369000       0.238400       0.130500       0.632000
57268     57268     hubei          111.6333       32.2692          111       167     2012      07        24        206              0.247917      31.812988       0.412311       0.263950       0.384000       0.022500   -9999.000000   -9999.000000
57268     57268     hubei          111.6333       32.2692          111       167     2012      07        25        207              0.242292      30.810211       0.650475       0.261995       0.347500   -9999.000000       0.178300   -9999.000000
57268     57268     hubei          111.6333       32.2692          111       167     2012      07        26        208              0.234333      33.405243       0.000000       0.249355       0.297000       0.194200       0.153300       0.665000
57268     57268     hubei          111.6333       32.2692          111       167     2012      07        27        209              0.227750      34.446869       0.000000       0.235488       0.276000   -9999.000000       0.164500   -9999.000000
57268     57268     hubei          111.6333       32.2692          111       167     2012      07        28        210              0.223000      34.422760       0.000000       0.225270   -9999.000000       0.138100       0.137200       0.582000
57268     57268     hubei          111.6333       32.2692          111       167     2012      07        29        211              0.219208      35.372314       1.683903       0.217164       0.324000       0.240400   -9999.000000   -9999.000000
57268     57268     hubei          111.6333       32.2692          111       167     2012      07        30        212              0.216750      35.852356       1.270487       0.210915       0.322000       0.232800   -9999.000000   -9999.000000
57268     57268     hubei          111.6333       32.2692          111       167     2012      07        31        213              0.213917      34.393677       1.667464       0.207407       0.343000       0.121700       0.157800       0.662000
57268     57268     hubei          111.6333       32.2692          111       167     2012      08        01        214              0.211667      34.568970       0.000000       0.212849       0.291000   -9999.000000       0.169300   -9999.000000
57268     57268     hubei          111.6333       32.2692          111       167     2012      08        02        215              0.210500      32.440338       0.000000       0.214659   -9999.000000       0.153500       0.148800       0.462000
57268     57268     hubei          111.6333       32.2692          111       167     2012      08        03        216              0.210250      33.276337       0.000000       0.201460       0.346000       0.142600       0.136100   -9999.000000
57268     57268     hubei          111.6333       32.2692          111       167     2012      08        04        217              0.231667      33.230011      16.174181       0.195432       0.314000       0.108900   -9999.000000       0.415000
57268     57268     hubei          111.6333       32.2692          111       167     2012      08        05        218              0.388609      31.263123      33.710739       0.250937       0.339000       0.419300   -9999.000000       1.000000
57268     57268     hubei          111.6333       32.2692          111       167     2012      08        06        219              0.397250      28.886078       0.310623       0.367630       0.344500   -9999.000000       0.144000   -9999.000000
57268     57268     hubei          111.6333       32.2692          111       167     2012      08        07        220              0.332800      30.187988       0.000000       0.334825       0.272000   -9999.000000       0.140100       0.566000
57268     57268     hubei          111.6333       32.2692          111       167     2012      08        08        221              0.328625      31.195770       0.000000       0.311721   -9999.000000       0.297100       0.145300   -9999.000000
57268     57268     hubei          111.6333       32.2692          111       167     2012      08        09        222              0.319750      30.894836       0.000000       0.296555       0.311000   -9999.000000       0.139700       0.493000
57268     57268     hubei          111.6333       32.2692          111       167     2012      08        10        223              0.309500      31.393707       0.000000       0.283181       0.322500       0.140400   -9999.000000       0.557000
57268     57268     hubei          111.6333       32.2692          111       167     2012      08        11        224              0.301250      31.361084       0.000000       0.272764       0.306000       0.135300       0.161300   -9999.000000
57268     57268     hubei          111.6333       32.2692          111       167     2012      08        12        225              0.293375      31.623291       0.808080       0.264719       0.272000       0.324700       0.146100       0.477000
57268     57268     hubei          111.6333       32.2692          111       167     2012      08        13        226              0.284125      32.999481       0.066691       0.256649   -9999.000000       0.229900       0.151100   -9999.000000
57268     57268     hubei          111.6333       32.2692          111       167     2012      08        14        227              0.280125      28.165985       0.162814       0.258616       0.362000   -9999.000000       0.139800       0.576000
57268     57268     hubei          111.6333       32.2692          111       167     2012      08        15        228              0.283750      29.143341       0.777375       0.253556       0.319000   -9999.000000   -9999.000000   -9999.000000
57268     57268     hubei          111.6333       32.2692          111       167     2012      08        16        229              0.282458      29.182648       0.000000       0.259316       0.317500       0.233400   -9999.000000       0.539000
57268     57268     hubei          111.6333       32.2692          111       167     2012      08        17        230              0.279167      30.376648       0.000000       0.247110       0.278000   -9999.000000       0.134400       0.346000
57268     57268     hubei          111.6333       32.2692          111       167     2012      08        18        231              0.275708      32.135223       0.000000       0.235572       0.256000       0.204700       0.149500   -9999.000000
57268     57268     hubei          111.6333       32.2692          111       167     2012      08        19        232              0.301625      33.222809      24.716824       0.229264       0.442000   -9999.000000       0.138800       0.920000
57268     57268     hubei          111.6333       32.2692          111       167     2012      08        20        233              0.356250      31.792267      60.922150       0.310526       0.414000       0.108100       0.185700   -9999.000000
57268     57268     hubei          111.6333       32.2692          111       167     2012      08        21        234              0.358417      28.266113       3.079322       0.420614       0.308000       0.265800   -9999.000000       0.864000
57268     57268     hubei          111.6333       32.2692          111       167     2012      08        22        235              0.353917      26.892822       0.640894       0.377609       0.279000       0.082600   -9999.000000   -9999.000000
57268     57268     hubei          111.6333       32.2692          111       167     2012      08        23        236              0.348875      24.930634       0.000000       0.349561       0.230000       0.158600       0.189600   -9999.000000
57268     57268     hubei          111.6333       32.2692          111       167     2012      08        24        237              0.340542      24.966187       0.000000       0.334249   -9999.000000   -9999.000000       0.220100       0.617000
57268     57268     hubei          111.6333       32.2692          111       167     2012      08        25        238              0.000000      26.072235       0.256978       0.323907       0.294000       0.197500       0.192600   -9999.000000
57268     57268     hubei          111.6333       32.2692          111       167     2012      08        26        239              0.335958      26.683014       1.877117       0.317748       0.275000       0.270200       0.182400       0.526000
57268     57268     hubei          111.6333       32.2692          111       167     2012      08        27        240              0.334167      25.542725       0.000000       0.317116       0.264500   -9999.000000   -9999.000000   -9999.000000
57268     57268     hubei          111.6333       32.2692          111       167     2012      08        28        241              0.324333      27.838318       0.000000       0.306604       0.235000       0.089100       0.172500   -9999.000000
57268     57268     hubei          111.6333       32.2692          111       167     2012      08        29        242              0.311167      29.205933       1.428065       0.297175   -9999.000000   -9999.000000       0.181200       0.716000
57268     57268     hubei          111.6333       32.2692          111       167     2012      08        30        243              0.300333      30.529816       0.562544       0.289925       0.286000       0.279900       0.181700   -9999.000000
57268     57268     hubei          111.6333       32.2692          111       167     2012      08        31        244              0.295208      30.493591       0.174926       0.284571       0.308500       0.287400       0.173300       0.755000
57268     57268     hubei          111.6333       32.2692          111       167     2012      09        01        245              0.297792      27.971008       1.634426       0.288470       0.265500   -9999.000000   -9999.000000   -9999.000000
57268     57268     hubei          111.6333       32.2692          111       167     2012      09        02        246              0.311583      28.740448       0.192822       0.288155       0.235500       0.115900   -9999.000000       0.596000
57268     57268     hubei          111.6333       32.2692          111       167     2012      09        03        247              0.302292      25.186157       0.000000       0.284091       0.196000       0.210200       0.148800       0.561000
57268     57268     hubei          111.6333       32.2692          111       167     2012      09        04        248              0.286417      27.127625       0.000000       0.271241   -9999.000000       0.296400       0.170800   -9999.000000
57268     57268     hubei          111.6333       32.2692          111       167     2012      09        05        249              0.273833      27.637939       0.000000       0.259499       0.234000       0.164300       0.156900       0.414000
57268     57268     hubei          111.6333       32.2692          111       167     2012      09        06        250              0.270000      28.135864       0.331319       0.250267       0.277000   -9999.000000       0.145200   -9999.000000
57268     57268     hubei          111.6333       32.2692          111       167     2012      09        07        251              0.268542      25.731171       9.907243       0.251785       0.286500       0.104700   -9999.000000       0.720000
57268     57268     hubei          111.6333       32.2692          111       167     2012      09        08        252              0.356833      27.747009      26.478453       0.280818       0.310000       0.398800       0.201900       0.881000
57268     57268     hubei          111.6333       32.2692          111       167     2012      09        09        253              0.350000      24.253510       0.000000       0.369262   -9999.000000       0.095200       0.173700   -9999.000000
57268     57268     hubei          111.6333       32.2692          111       167     2012      09        10        254              0.345000      25.796356       1.258213       0.334247       0.295000       0.325500       0.218200       0.633000
57268     57268     hubei          111.6333       32.2692          111       167     2012      09        11        255              0.359833      25.673340      16.693100       0.323945       0.253000   -9999.000000       0.209200   -9999.000000
57268     57268     hubei          111.6333       32.2692          111       167     2012      09        12        256              0.355875      23.539917       0.696332       0.362147       0.232000       0.191000   -9999.000000       0.751000
57268     57268     hubei          111.6333       32.2692          111       167     2012      09        13        257              0.354652      22.124664       0.000000       0.345539       0.220000       0.156800   -9999.000000   -9999.000000
57268     57268     hubei          111.6333       32.2692          111       167     2012      09        14        258              0.363125      22.518951       0.000000       0.329225       0.183000   -9999.000000       0.185800       0.526000
57268     57268     hubei          111.6333       32.2692          111       167     2012      09        15        259              0.362667      22.969666       0.937544       0.319770   -9999.000000       0.180500       0.202700       0.484000
57268     57268     hubei          111.6333       32.2692          111       167     2012      09        16        260              0.352292      23.029449       0.807581       0.312371       0.234000   -9999.000000       0.179600   -9999.000000
57268     57268     hubei          111.6333       32.2692          111       167     2012      09        17        261              0.348958      23.120728       4.004614       0.309087       0.243000   -9999.000000       0.141400       0.618000
57268     57268     hubei          111.6333       32.2692          111       167     2012      09        18        262              0.343542      23.428070       0.000000       0.303055       0.222000       0.335600   -9999.000000   -9999.000000
57268     57268     hubei          111.6333       32.2692          111       167     2012      09        19        263              0.334542      24.343262       0.266067       0.297505       0.204000   -9999.000000   -9999.000000       0.575000
57268     57268     hubei          111.6333       32.2692          111       167     2012      09        20        264              0.321375      25.632385       0.094822       0.290662   -9999.000000       0.196300       0.142900   -9999.000000
57268     57268     hubei          111.6333       32.2692          111       167     2012      09        21        265              0.316542      25.943726       0.548375       0.285787   -9999.000000       0.206700       0.166800   -9999.000000
57268     57268     hubei          111.6333       32.2692          111       167     2012      09        22        266              0.312292      25.503876       0.000000       0.284326       0.210500       0.176500       0.148800       0.663000
57268     57268     hubei          111.6333       32.2692          111       167     2012      09        23        267              0.308708      26.019623       0.118131       0.280791       0.198500       0.145000       0.138100   -9999.000000
57268     57268     hubei          111.6333       32.2692          111       167     2012      09        24        268              0.303500      25.294495       1.446444       0.278253       0.214000   -9999.000000   -9999.000000       0.574000
57268     57268     hubei          111.6333       32.2692          111       167     2012      09        25        269              0.300250      25.079407       0.358192       0.276410   -9999.000000       0.215600       0.163100   -9999.000000
57268     57268     hubei          111.6333       32.2692          111       167     2012      09        26        270              0.299917      24.226257       2.221748       0.277740       0.238000       0.228300       0.141100   -9999.000000
57268     57268     hubei          111.6333       32.2692          111       167     2012      09        27        271              0.300214      23.021820       0.634099       0.290686       0.214000       0.018700       0.147100       0.734000
57268     57268     hubei          111.6333       32.2692          111       167     2012      09        28        272              0.290375      25.347931       0.000000       0.286778       0.193000   -9999.000000       0.139300   -9999.000000
57268     57268     hubei          111.6333       32.2692          111       167     2012      09        29        273              0.283333      22.374268       0.000000       0.272277       0.184000   -9999.000000   -9999.000000       0.388000
57268     57268     hubei          111.6333       32.2692          111       167     2012      09        30        274              0.274708      22.074707       0.000000       0.264357       0.183000       0.218400   -9999.000000   -9999.000000
57268     57268     hubei          111.6333       32.2692          111       167     2012      10        01        275              0.269833      22.149139       0.000000       0.258267   -9999.000000   -9999.000000       0.106700       0.429000
57268     57268     hubei          111.6333       32.2692          111       167     2012      10        02        276              0.265000      22.859314       1.028517       0.252658       0.224000   -9999.000000       0.122400       0.539000
57268     57268     hubei          111.6333       32.2692          111       167     2012      10        03        277              0.261958      23.086182       0.000000       0.250563       0.200500       0.079200       0.105200   -9999.000000
57268     57268     hubei          111.6333       32.2692          111       167     2012      10        04        278              0.259250      22.267303       0.124695       0.249576       0.208000   -9999.000000       0.106900       0.450000
57268     57268     hubei          111.6333       32.2692          111       167     2012      10        05        279              0.258250      22.777100       0.269148       0.249701       0.196000       0.122900   -9999.000000   -9999.000000
57268     57268     hubei          111.6333       32.2692          111       167     2012      10        06        280              0.256958      22.179291       0.000000       0.249712   -9999.000000       0.229600   -9999.000000       0.530000
57268     57268     hubei          111.6333       32.2692          111       167     2012      10        07        281              0.256625      22.039948       0.095175       0.248756       0.212000   -9999.000000       0.104100       0.438000
57268     57268     hubei          111.6333       32.2692          111       167     2012      10        08        282              0.257125      21.124329       0.795897       0.249822       0.222000       0.187100       0.100400   -9999.000000
57268     57268     hubei          111.6333       32.2692          111       167     2012      10        09        283              0.256542      22.137848       0.000000       0.254138       0.198000       0.144800       0.088400       0.353000
57268     57268     hubei          111.6333       32.2692          111       167     2012      10        10        284              0.252167      22.565582       0.000000       0.247201       0.199000   -9999.000000       0.079900   -9999.000000
57268     57268     hubei          111.6333       32.2692          111       167     2012      10        11        285              0.250333      22.297760       0.418598       0.240449       0.137000       0.050800   -9999.000000       0.308000
57268     57268     hubei          111.6333       32.2692          111       167     2012      10        12        286              0.251458      20.622559       0.738308       0.242247   -9999.000000   -9999.000000       0.102900   -9999.000000
57268     57268     hubei          111.6333       32.2692          111       167     2012      10        13        287              0.251958      19.796448       0.331998       0.251432       0.162000       0.396100       0.091000       0.394000
57268     57268     hubei          111.6333       32.2692          111       167     2012      10        14        288              0.250542      21.391205       0.000000       0.247308       0.175000       0.122400       0.094000       0.247000
57268     57268     hubei          111.6333       32.2692          111       167     2012      10        15        289              0.271625      21.122162      10.548920       0.244171       0.203500       0.112100       0.124700   -9999.000000
57268     57268     hubei          111.6333       32.2692          111       167     2012      10        16        290              0.316208      19.491974       0.000000       0.292523       0.172000       0.131500   -9999.000000       0.645000
57268     57268     hubei          111.6333       32.2692          111       167     2012      10        17        291              0.306208      17.007660       0.000000       0.298495   -9999.000000   -9999.000000   -9999.000000   -9999.000000
57268     57268     hubei          111.6333       32.2692          111       167     2012      10        18        292              0.292500      18.232086       0.000000       0.281224       0.184000       0.123000       0.111200       0.514000
57268     57268     hubei          111.6333       32.2692          111       167     2012      10        19        293              0.280565      19.587952       0.000000       0.273046       0.163000       0.218900       0.116100   -9999.000000
57268     57268     hubei          111.6333       32.2692          111       167     2012      10        20        294              0.272333      20.242981       0.130299       0.267759       0.156500   -9999.000000       0.111000   -9999.000000
57268     57268     hubei          111.6333       32.2692          111       167     2012      10        21        295              0.295708      21.672882       5.144540       0.263357       0.204000       0.124300       0.097300       0.882000
57268     57268     hubei          111.6333       32.2692          111       167     2012      10        22        296              0.321458      20.519623       0.035134       0.281741   -9999.000000   -9999.000000   -9999.000000   -9999.000000
57268     57268     hubei          111.6333       32.2692          111       167     2012      10        23        297              0.313875      17.301636       0.812813       0.277992   -9999.000000   -9999.000000   -9999.000000       0.628000
57268     57268     hubei          111.6333       32.2692          111       167     2012      10        24        298              0.309917      16.874054       0.000000       0.275050   -9999.000000       0.365200       0.095700   -9999.000000
57268     57268     hubei          111.6333       32.2692          111       167     2012      10        25        299              0.000000      17.761932       0.341525       0.272051       0.232000   -9999.000000       0.114200   -9999.000000
57268     57268     hubei          111.6333       32.2692          111       167     2012      10        26        300              0.308083      19.273193       1.458859       0.267389       0.232000       0.125300       0.096300       0.637000
57268     57268     hubei          111.6333       32.2692          111       167     2012      10        27        301              0.303583      16.947388       0.637511       0.276465       0.187000       0.235800       0.095800   -9999.000000
57268     57268     hubei          111.6333       32.2692          111       167     2012      10        28        302              0.000000      19.644806       0.344072       0.270604   -9999.000000   -9999.000000   -9999.000000       0.508000
57268     57268     hubei          111.6333       32.2692          111       167     2012      10        29        303              0.334750      19.169617       9.817185       0.267873   -9999.000000       0.138300       0.125900   -9999.000000
57268     57268     hubei          111.6333       32.2692          111       167     2012      10        30        304              0.335875      16.365692       0.000000       0.318980       0.231000   -9999.000000       0.113500       0.663000
57268     57268     hubei          111.6333       32.2692          111       167     2012      10        31        305              0.329042      15.632233       0.000000       0.299665       0.217000   -9999.000000       0.112000       0.461000
57268     57268     hubei          111.6333       32.2692          111       167     2012      11        01        306              0.325292      15.408600       0.000000       0.288618       0.167000       0.295800       0.097700   -9999.000000
57268     57268     hubei          111.6333       32.2692          111       167     2012      11        02        307              0.324167      15.455170      14.693317       0.285043   -9999.000000       0.135800   -9999.000000       0.378000
57268     57268     hubei          111.6333       32.2692          111       167     2012      11        03        308              0.348625      17.192169       6.936330       0.300827   -9999.000000       0.270300   -9999.000000   -9999.000000
57268     57268     hubei          111.6333       32.2692          111       167     2012      11        04        309              0.348826      11.872101       0.000000       0.346155       0.198000   -9999.000000       0.097700       0.471000
57268     57268     hubei          111.6333       32.2692          111       167     2012      11        05        310              0.348542      11.953400       0.456799       0.321397       0.218000       0.137800       0.109900       0.361000
57268     57268     hubei          111.6333       32.2692          111       167     2012      11        06        311              0.341000      12.227356       0.000000       0.313418       0.179000       0.235800       0.095500   -9999.000000
57268     57268     hubei          111.6333       32.2692          111       167     2012      11        07        312              0.337042      12.918427       0.483277       0.307736       0.184000   -9999.000000       0.095900       0.683000
57268     57268     hubei          111.6333       32.2692          111       167     2012      11        08        313              0.336542      12.649750       0.000000       0.308310   -9999.000000       0.174600   -9999.000000   -9999.000000
57268     57268     hubei          111.6333       32.2692          111       167     2012      11        09        314              0.337167      12.787292       2.122177       0.305979   -9999.000000   -9999.000000       0.127900       0.877000
57268     57268     hubei          111.6333       32.2692          111       167     2012      11        10        315              0.340417      11.654114       0.000000       0.312935       0.252000       0.159700       0.093500   -9999.000000
57268     57268     hubei          111.6333       32.2692          111       167     2012      11        11        316              0.336458      11.376343       0.000000       0.309126       0.149000       0.191400       0.107600       0.309000
57268     57268     hubei          111.6333       32.2692          111       167     2012      11        12        317              0.333167      11.542023       0.221490       0.302209       0.137000   -9999.000000       0.087700       0.195000
57268     57268     hubei          111.6333       32.2692          111       167     2012      11        13        318              0.000000      12.230438       1.126299       0.299039   -9999.000000       0.101800   -9999.000000   -9999.000000
57268     57268     hubei          111.6333       32.2692          111       167     2012      11        14        319              0.326875      13.395081       0.000000       0.296267       0.171000       0.226800   -9999.000000       0.390000
57268     57268     hubei          111.6333       32.2692          111       167     2012      11        15        320              0.343167      10.239838      10.230224       0.295676   -9999.000000   -9999.000000       0.105100   -9999.000000
57268     57268     hubei          111.6333       32.2692          111       167     2012      11        16        321              0.349375       9.112335       0.000000       0.329666       0.150000       0.184400       0.103700       0.491000
57268     57268     hubei          111.6333       32.2692          111       167     2012      11        17        322              0.000000      10.892578       0.000000       0.321937       0.135000   -9999.000000       0.097200   -9999.000000
57268     57268     hubei          111.6333       32.2692          111       167     2012      11        18        323              0.343208      10.763947       0.000000       0.315457   -9999.000000       0.231300       0.087800   -9999.000000
57268     57268     hubei          111.6333       32.2692          111       167     2012      11        19        324              0.341167      10.693939       0.120315       0.312315   -9999.000000       0.245600   -9999.000000       0.577000
57268     57268     hubei          111.6333       32.2692          111       167     2012      11        20        325              0.340125      11.017975       1.286081       0.309931   -9999.000000       0.029800   -9999.000000   -9999.000000
57268     57268     hubei          111.6333       32.2692          111       167     2012      11        21        326              0.343542      10.242950       0.000000       0.312326       0.158500       0.114400       0.065000       0.550000
57268     57268     hubei          111.6333       32.2692          111       167     2012      11        22        327              0.343417      11.672943       0.000000       0.311238       0.156000   -9999.000000       0.083000   -9999.000000
57268     57268     hubei          111.6333       32.2692          111       167     2012      11        23        328              0.340500       9.948578       0.000000       0.309428   -9999.000000       0.143000       0.079200   -9999.000000
57268     57268     hubei          111.6333       32.2692          111       167     2012      11        24        329              0.338667       7.699371       2.684358       0.305974   -9999.000000       0.149400       0.073800       0.462000
57268     57268     hubei          111.6333       32.2692          111       167     2012      11        25        330              0.347333       7.300720       1.723323       0.311054   -9999.000000   -9999.000000   -9999.000000   -9999.000000
57268     57268     hubei          111.6333       32.2692          111       167     2012      11        26        331              0.344625       7.677704       0.000000       0.324000       0.167000       0.021200   -9999.000000       0.368000
57268     57268     hubei          111.6333       32.2692          111       167     2012      11        27        332              0.344208       8.237671       0.000000       0.312367       0.156000   -9999.000000       0.081200   -9999.000000
57268     57268     hubei          111.6333       32.2692          111       167     2012      11        28        333              0.342042       9.177460       0.000000       0.309026       0.138000       0.117300       0.086500       0.400000
57268     57268     hubei          111.6333       32.2692          111       167     2012      11        29        334              0.338208       7.936646       0.194343       0.307187   -9999.000000       0.233300       0.077600       0.438000
57268     57268     hubei          111.6333       32.2692          111       167     2012      11        30        335              0.339458       6.463806       6.117850       0.306360   -9999.000000   -9999.000000   -9999.000000   -9999.000000
57268     57268     hubei          111.6333       32.2692          111       167     2012      12        01        336              0.354250       7.264893       3.244315       0.317834   -9999.000000       0.277200   -9999.000000       0.497000
57268     57268     hubei          111.6333       32.2692          111       167     2012      12        02        337              0.349875       4.201874       0.447473       0.337877   -9999.000000       0.190800       0.081900   -9999.000000
57268     57268     hubei          111.6333       32.2692          111       167     2012      12        03        338              0.347250       4.670746       0.000000       0.325618       0.133000   -9999.000000       0.101300       0.449000
57268     57268     hubei          111.6333       32.2692          111       167     2012      12        04        339              0.347875       7.868988       0.000000       0.318807   -9999.000000       0.173600       0.096200       0.290000
57268     57268     hubei          111.6333       32.2692          111       167     2012      12        05        340              0.352250       5.804138       0.215327       0.316846   -9999.000000   -9999.000000       0.080200   -9999.000000
57268     57268     hubei          111.6333       32.2692          111       167     2012      12        06        341              0.351500       7.999695       0.000000       0.313207   -9999.000000       0.246800   -9999.000000       0.324000
57268     57268     hubei          111.6333       32.2692          111       167     2012      12        07        342              0.349000       7.632080       0.000000       0.310370       0.151000       0.288000   -9999.000000   -9999.000000
57268     57268     hubei          111.6333       32.2692          111       167     2012      12        08        343              0.346833       8.597137       0.000000       0.308413       0.136000       0.216900       0.078800       0.189000
57268     57268     hubei          111.6333       32.2692          111       167     2012      12        09        344              0.345458       7.114105       2.548797       0.305868       0.129000       0.181600       0.100400   -9999.000000
57268     57268     hubei          111.6333       32.2692          111       167     2012      12        10        345              0.351625       6.363617       0.000000       0.310837   -9999.000000   -9999.000000       0.065900       0.188000
57268     57268     hubei          111.6333       32.2692          111       167     2012      12        11        346              0.348417       4.978394       0.402216       0.313698   -9999.000000       0.173400       0.065900       0.233000
57268     57268     hubei          111.6333       32.2692          111       167     2012      12        12        347              0.345542       4.440613       0.000000       0.309040   -9999.000000       0.216000   -9999.000000   -9999.000000
57268     57268     hubei          111.6333       32.2692          111       167     2012      12        13        348              0.350333       3.495819       4.107256       0.308154   -9999.000000   -9999.000000       0.079100       0.661000
57268     57268     hubei          111.6333       32.2692          111       167     2012      12        14        349              0.354292       3.250488       3.139226       0.326033   -9999.000000       0.276100       0.075800   -9999.000000
57268     57268     hubei          111.6333       32.2692          111       167     2012      12        15        350              0.000000       4.404663       0.101626       0.328569   -9999.000000   -9999.000000       0.084600       0.429000
57268     57268     hubei          111.6333       32.2692          111       167     2012      12        16        351              0.350000       4.223053       0.000000       0.324086   -9999.000000       0.240400       0.072700   -9999.000000
57268     57268     hubei          111.6333       32.2692          111       167     2012      12        17        352              0.358875       5.693573      14.341716       0.319717   -9999.000000       0.109600   -9999.000000   -9999.000000
57268     57268     hubei          111.6333       32.2692          111       167     2012      12        18        353              0.354292       4.380005       0.000000       0.352395   -9999.000000   -9999.000000   -9999.000000       0.654000
57268     57268     hubei          111.6333       32.2692          111       167     2012      12        19        354              0.357083       3.570953       5.943956       0.342630   -9999.000000       0.203200       0.075000   -9999.000000
57268     57268     hubei          111.6333       32.2692          111       167     2012      12        20        355              0.000000       2.751801       0.177714       0.345364   -9999.000000       0.193100       0.072500       0.457000
57268     57268     hubei          111.6333       32.2692          111       167     2012      12        21        356              0.352500       1.377594       1.456545       0.329759   -9999.000000   -9999.000000       0.074800   -9999.000000
57268     57268     hubei          111.6333       32.2692          111       167     2012      12        22        357              0.351083       3.490906       1.980230       0.335875   -9999.000000   -9999.000000       0.080700   -9999.000000
57268     57268     hubei          111.6333       32.2692          111       167     2012      12        23        358              0.348750       3.604065       0.000000       0.330355   -9999.000000   -9999.000000   -9999.000000       0.192000
57268     57268     hubei          111.6333       32.2692          111       167     2012      12        24        359              0.350100       2.349884       0.000000       0.305360   -9999.000000       0.184600       0.088200   -9999.000000
57268     57268     hubei          111.6333       32.2692          111       167     2012      12        25        360              0.349458       2.359772       0.000000       0.304248   -9999.000000       0.264300       0.068800       0.141000
57268     57268     hubei          111.6333       32.2692          111       167     2012      12        26        361              0.000000       1.292450       0.828028       0.295780   -9999.000000       0.135900       0.089300   -9999.000000
57268     57268     hubei          111.6333       32.2692          111       167     2012      12        27        362              0.358000       0.648956       2.407026       0.279664   -9999.000000       0.167400       0.088500       0.338000
57268     57268     hubei          111.6333       32.2692          111       167     2012      12        28        363              0.355000       1.315521       0.303387       0.306887   -9999.000000   -9999.000000   -9999.000000       0.463000
57268     57268     hubei          111.6333       32.2692          111       167     2012      12        29        364              0.000000       1.559906       2.081405       0.315325   -9999.000000       0.225200   -9999.000000   -9999.000000
57268     57268     hubei          111.6333       32.2692          111       167     2012      12        30        365              0.000000       2.059143       0.000000       0.298717       0.125000       0.385500       0.072900       0.043000
57268     57268     hubei          111.6333       32.2692          111       167     2012      12        31        366              0.332067       2.164276       0.000000       0.280834       0.110000   -9999.000000       0.071400   -9999.000000
