# Supplementary material for: Research on Fusing Multisatellite Soil Moisture Data Based on Bayesian Model Averaging
Source: Hindawi journal article supplement (doi:10.1155/2018/9310838), 2018-06-25
Supplement: f1 [file 9310838.f1.zip › 2012_sm00-10cm_daily_ZDB_ZHY_57274_366days_allin.txt]

57274     57274     henan          112.2161       32.6403          109       169     2012      01        01        001              0.000000   -9999.000000       0.037870   -9999.000000       0.118000   -9999.000000       0.083400   -9999.000000
57274     57274     henan          112.2161       32.6403          109       169     2012      01        02        002              0.302000       1.787781       0.000000       0.279088   -9999.000000       0.174100       0.111400       0.278000
57274     57274     henan          112.2161       32.6403          109       169     2012      01        03        003              0.000000       2.411682       0.000000       0.300395       0.118000       0.053900   -9999.000000       0.150000
57274     57274     henan          112.2161       32.6403          109       169     2012      01        04        004              0.299417       1.630157       0.000000       0.263691   -9999.000000   -9999.000000       0.099300   -9999.000000
57274     57274     henan          112.2161       32.6403          109       169     2012      01        05        005              0.298875       0.590851       0.000000       0.242686   -9999.000000       0.024900       0.101300       0.142000
57274     57274     henan          112.2161       32.6403          109       169     2012      01        06        006              0.299583       0.512146       0.000000       0.241840       0.108000   -9999.000000       0.114400   -9999.000000
57274     57274     henan          112.2161       32.6403          109       169     2012      01        07        007              0.300000       1.941284       0.000000       0.268355       0.123000   -9999.000000       0.114700       0.256000
57274     57274     henan          112.2161       32.6403          109       169     2012      01        08        008              0.000000       1.740387       0.000000       0.277551       0.118000       0.051300   -9999.000000   -9999.000000
57274     57274     henan          112.2161       32.6403          109       169     2012      01        09        009              0.300292       2.787231       0.000000       0.275200   -9999.000000   -9999.000000   -9999.000000   -9999.000000
57274     57274     henan          112.2161       32.6403          109       169     2012      01        10        010              0.299625       2.890900       0.000000       0.278423   -9999.000000       0.031800       0.038600       0.190000
57274     57274     henan          112.2161       32.6403          109       169     2012      01        11        011              0.298750       2.407745       1.979132       0.273062       0.106000   -9999.000000       0.081800   -9999.000000
57274     57274     henan          112.2161       32.6403          109       169     2012      01        12        012              0.297500       2.334747       0.112412       0.271314   -9999.000000       0.022800       0.070700       0.149000
57274     57274     henan          112.2161       32.6403          109       169     2012      01        13        013              0.297708       0.815796       0.528504       0.257143   -9999.000000       0.046000       0.080200   -9999.000000
57274     57274     henan          112.2161       32.6403          109       169     2012      01        14        014              0.298292       0.735138       0.834353       0.260539       0.129000   -9999.000000   -9999.000000   -9999.000000
57274     57274     henan          112.2161       32.6403          109       169     2012      01        15        015              0.298333       1.448120       0.000000       0.278268   -9999.000000       0.054300       0.078500       0.234000
57274     57274     henan          112.2161       32.6403          109       169     2012      01        16        016              0.297652       2.937592       0.000000       0.284301       0.126000   -9999.000000       0.040200   -9999.000000
57274     57274     henan          112.2161       32.6403          109       169     2012      01        17        017              0.000000       1.871796       0.462159       0.279659       0.131000   -9999.000000       0.076800       0.192000
57274     57274     henan          112.2161       32.6403          109       169     2012      01        18        018              0.298000       3.003357       0.359665       0.297695   -9999.000000   -9999.000000       0.074800   -9999.000000
57274     57274     henan          112.2161       32.6403          109       169     2012      01        19        019              0.298000       2.869904       0.000000       0.309930   -9999.000000   -9999.000000       0.066200       0.346000
57274     57274     henan          112.2161       32.6403          109       169     2012      01        20        020              0.297333       3.598541       1.483437       0.310759   -9999.000000       0.109500   -9999.000000       0.599000
57274     57274     henan          112.2161       32.6403          109       169     2012      01        21        021              0.296458       2.462585       0.000000       0.299413   -9999.000000       0.053500       0.055100   -9999.000000
57274     57274     henan          112.2161       32.6403          109       169     2012      01        22        022              0.294833       0.075378       0.963342       0.249091   -9999.000000   -9999.000000       0.053000       0.169000
57274     57274     henan          112.2161       32.6403          109       169     2012      01        23        023              0.291750      -0.784668       0.000000       0.223768   -9999.000000       0.215900       0.074100   -9999.000000
57274     57274     henan          112.2161       32.6403          109       169     2012      01        24        024              0.293958       0.492828       0.263449       0.237839       0.135000   -9999.000000   -9999.000000       0.238000
57274     57274     henan          112.2161       32.6403          109       169     2012      01        25        025              0.292500       0.864532       0.149833       0.247182   -9999.000000       0.161800   -9999.000000   -9999.000000
57274     57274     henan          112.2161       32.6403          109       169     2012      01        26        026              0.294125       1.271484       0.000000       0.249799   -9999.000000       0.025100   -9999.000000       0.177000
57274     57274     henan          112.2161       32.6403          109       169     2012      01        27        027              0.295000       2.057678       0.103135       0.261385       0.101000       0.340600       0.036900       0.099000
57274     57274     henan          112.2161       32.6403          109       169     2012      01        28        028              0.296125       2.720154       3.436958       0.290382       0.117000       0.200200       0.086600   -9999.000000
57274     57274     henan          112.2161       32.6403          109       169     2012      01        29        029              0.294708       4.378876       0.158849       0.298825   -9999.000000   -9999.000000       0.078100       0.314000
57274     57274     henan          112.2161       32.6403          109       169     2012      01        30        030              0.295750       2.916473       0.394253       0.298594   -9999.000000       0.063200       0.085700   -9999.000000
57274     57274     henan          112.2161       32.6403          109       169     2012      01        31        031              0.295542       3.384216       0.000000       0.288376   -9999.000000       0.077500   -9999.000000       0.171000
57274     57274     henan          112.2161       32.6403          109       169     2012      02        01        032              0.294875       4.373505       3.735693       0.299441   -9999.000000   -9999.000000       0.084800       0.105000
57274     57274     henan          112.2161       32.6403          109       169     2012      02        02        033              0.294042       2.420776       0.000000       0.279784       0.124000       0.065200       0.058600   -9999.000000
57274     57274     henan          112.2161       32.6403          109       169     2012      02        03        034              0.293208       1.610870       0.000000       0.257369       0.133000   -9999.000000       0.090400       0.059000
57274     57274     henan          112.2161       32.6403          109       169     2012      02        04        035              0.291292       2.763824       0.000000       0.266695   -9999.000000   -9999.000000       0.086900   -9999.000000
57274     57274     henan          112.2161       32.6403          109       169     2012      02        05        036              0.292875       1.518402       0.000000       0.278163       0.115000   -9999.000000   -9999.000000       0.214000
57274     57274     henan          112.2161       32.6403          109       169     2012      02        06        037              0.294417       3.875397       0.000000       0.298262   -9999.000000   -9999.000000   -9999.000000   -9999.000000
57274     57274     henan          112.2161       32.6403          109       169     2012      02        07        038              0.292750       5.879913       0.000000       0.294383   -9999.000000       0.084700       0.081900   -9999.000000
57274     57274     henan          112.2161       32.6403          109       169     2012      02        08        039              0.293542       3.043671       2.771997       0.270730   -9999.000000   -9999.000000       0.100600       0.056000
57274     57274     henan          112.2161       32.6403          109       169     2012      02        09        040              0.291167       3.407928       0.000000       0.265673   -9999.000000       0.079700       0.086400   -9999.000000
57274     57274     henan          112.2161       32.6403          109       169     2012      02        10        041              0.292250       1.237335       0.000000       0.257882   -9999.000000       0.063800       0.095100       0.084000
57274     57274     henan          112.2161       32.6403          109       169     2012      02        11        042              0.292917       3.686554       0.000000       0.265775   -9999.000000   -9999.000000   -9999.000000   -9999.000000
57274     57274     henan          112.2161       32.6403          109       169     2012      02        12        043              0.290833       4.539795       0.000000       0.282545   -9999.000000   -9999.000000   -9999.000000   -9999.000000
57274     57274     henan          112.2161       32.6403          109       169     2012      02        13        044              0.290708       2.995575       0.000000       0.273299   -9999.000000       0.036200   -9999.000000       0.160000
57274     57274     henan          112.2161       32.6403          109       169     2012      02        14        045              0.291000       3.861694       0.000000       0.284770       0.131000   -9999.000000       0.074800   -9999.000000
57274     57274     henan          112.2161       32.6403          109       169     2012      02        15        046              0.290833       4.195984       0.360317       0.296407   -9999.000000   -9999.000000       0.071400       0.379000
57274     57274     henan          112.2161       32.6403          109       169     2012      02        16        047              0.291583       4.191498       0.000000       0.299729   -9999.000000   -9999.000000       0.070100   -9999.000000
57274     57274     henan          112.2161       32.6403          109       169     2012      02        17        048              0.290792       5.359039       0.000000       0.297396       0.098000   -9999.000000   -9999.000000       0.149000
57274     57274     henan          112.2161       32.6403          109       169     2012      02        18        049              0.290227       5.020721       0.000000       0.282916       0.112000       0.079000       0.069600       0.065000
57274     57274     henan          112.2161       32.6403          109       169     2012      02        19        050              0.289958       4.930023       0.858982       0.275060       0.122000   -9999.000000       0.048700   -9999.000000
57274     57274     henan          112.2161       32.6403          109       169     2012      02        20        051              0.289417       5.838135       0.000000       0.286469   -9999.000000       0.234800       0.092800       0.126000
57274     57274     henan          112.2161       32.6403          109       169     2012      02        21        052              0.291625       5.158966       0.000000       0.292520       0.093000   -9999.000000   -9999.000000   -9999.000000
57274     57274     henan          112.2161       32.6403          109       169     2012      02        22        053              0.291833       9.408447       0.000000       0.290712       0.091000   -9999.000000   -9999.000000       0.162000
57274     57274     henan          112.2161       32.6403          109       169     2012      02        23        054              0.287083      11.021149       0.132679       0.288465       0.105500       0.065100   -9999.000000       0.194000
57274     57274     henan          112.2161       32.6403          109       169     2012      02        24        055              0.285750       5.052277       0.000000       0.288215       0.108500   -9999.000000       0.070700       0.117000
57274     57274     henan          112.2161       32.6403          109       169     2012      02        25        056              0.282500       4.636597       0.000000       0.288963       0.112000       0.089800       0.089800       0.050000
57274     57274     henan          112.2161       32.6403          109       169     2012      02        26        057              0.282125       3.437653       0.163311       0.280570   -9999.000000       0.020100       0.074700   -9999.000000
57274     57274     henan          112.2161       32.6403          109       169     2012      02        27        058              0.280917       4.456573       0.000000       0.276631   -9999.000000   -9999.000000   -9999.000000       0.114000
57274     57274     henan          112.2161       32.6403          109       169     2012      02        28        059              0.280208       5.276947       0.000000       0.279567       0.108000   -9999.000000   -9999.000000   -9999.000000
57274     57274     henan          112.2161       32.6403          109       169     2012      02        29        060              0.000000   -9999.000000       0.000000   -9999.000000       0.109500   -9999.000000   -9999.000000   -9999.000000
57274     57274     henan          112.2161       32.6403          109       169     2012      03        01        061              0.276708       5.718964       4.275743       0.285079   -9999.000000   -9999.000000       0.025100       0.329000
57274     57274     henan          112.2161       32.6403          109       169     2012      03        02        062              0.276333       3.935211       0.182492       0.309606   -9999.000000   -9999.000000       0.074100   -9999.000000
57274     57274     henan          112.2161       32.6403          109       169     2012      03        03        063              0.273750       5.830017       0.761122       0.302374   -9999.000000   -9999.000000       0.062100       0.267000
57274     57274     henan          112.2161       32.6403          109       169     2012      03        04        064              0.272500       3.414154       0.043390       0.303306       0.161000   -9999.000000       0.063000   -9999.000000
57274     57274     henan          112.2161       32.6403          109       169     2012      03        05        065              0.274208       4.248230       0.000000       0.299573       0.169000   -9999.000000   -9999.000000       0.122000
57274     57274     henan          112.2161       32.6403          109       169     2012      03        06        066              0.248458       6.699219       0.000000       0.297403       0.163000   -9999.000000       0.098000   -9999.000000
57274     57274     henan          112.2161       32.6403          109       169     2012      03        07        067              0.000000       8.462616       0.131328       0.294166   -9999.000000       0.172100       0.079500   -9999.000000
57274     57274     henan          112.2161       32.6403          109       169     2012      03        08        068              0.241792       8.176117       0.000000       0.291981       0.133000   -9999.000000       0.099400       0.168000
57274     57274     henan          112.2161       32.6403          109       169     2012      03        09        069              0.240417       7.270325       0.000000       0.290875       0.136000   -9999.000000       0.094500   -9999.000000
57274     57274     henan          112.2161       32.6403          109       169     2012      03        10        070              0.239957       7.318054       0.000000       0.289125       0.136000   -9999.000000   -9999.000000       0.035000
57274     57274     henan          112.2161       32.6403          109       169     2012      03        11        071              0.235750      10.052704       0.000000       0.285364       0.150000   -9999.000000   -9999.000000   -9999.000000
57274     57274     henan          112.2161       32.6403          109       169     2012      03        12        072              0.234000       6.981598       0.000000       0.281482       0.157000       0.120800       0.075600   -9999.000000
57274     57274     henan          112.2161       32.6403          109       169     2012      03        13        073              0.233625       8.428894       0.000000       0.280403       0.130000   -9999.000000       0.108700       0.076000
57274     57274     henan          112.2161       32.6403          109       169     2012      03        14        074              0.231583      11.595520       2.737645       0.277576       0.130000       0.015500   -9999.000000   -9999.000000
57274     57274     henan          112.2161       32.6403          109       169     2012      03        15        075              0.233375      13.090820       7.217799       0.280928       0.180000       0.077400       0.125400       0.305000
57274     57274     henan          112.2161       32.6403          109       169     2012      03        16        076              0.237208       8.265533       0.000000       0.327673       0.159500   -9999.000000   -9999.000000   -9999.000000
57274     57274     henan          112.2161       32.6403          109       169     2012      03        17        077              0.238500      10.328247       0.000000       0.309385       0.163000   -9999.000000   -9999.000000       0.139000
57274     57274     henan          112.2161       32.6403          109       169     2012      03        18        078              0.237833      12.638184       0.000000       0.302125   -9999.000000   -9999.000000       0.062200       0.200000
57274     57274     henan          112.2161       32.6403          109       169     2012      03        19        079              0.233042      10.841766       0.000000       0.297226       0.147000   -9999.000000       0.151000   -9999.000000
57274     57274     henan          112.2161       32.6403          109       169     2012      03        20        080              0.232875       5.407013       0.000000       0.296707       0.159000   -9999.000000       0.124900       0.069000
57274     57274     henan          112.2161       32.6403          109       169     2012      03        21        081              0.267250       6.706299      19.704861       0.295401       0.250000   -9999.000000       0.184500   -9999.000000
57274     57274     henan          112.2161       32.6403          109       169     2012      03        22        082              0.286083       5.051056       0.161075       0.353606       0.250000       0.212100   -9999.000000       0.455000
57274     57274     henan          112.2161       32.6403          109       169     2012      03        23        083              0.281208       6.933075       0.000000       0.338326   -9999.000000   -9999.000000       0.149500   -9999.000000
57274     57274     henan          112.2161       32.6403          109       169     2012      03        24        084              0.279167      10.492096       0.000000       0.324181       0.179000       0.135200   -9999.000000       0.058000
57274     57274     henan          112.2161       32.6403          109       169     2012      03        25        085              0.000000      13.082031       0.000000       0.315150       0.166500       0.137600       0.148700       0.069000
57274     57274     henan          112.2161       32.6403          109       169     2012      03        26        086              0.277167      14.700470       0.000000       0.308649       0.177000   -9999.000000       0.155500   -9999.000000
57274     57274     henan          112.2161       32.6403          109       169     2012      03        27        087              0.273833      17.058136       0.000000       0.303693       0.190000       0.033800   -9999.000000       0.103000
57274     57274     henan          112.2161       32.6403          109       169     2012      03        28        088              0.269292      18.013611       0.278549       0.298631   -9999.000000   -9999.000000   -9999.000000   -9999.000000
57274     57274     henan          112.2161       32.6403          109       169     2012      03        29        089              0.265625      18.675018       0.057398       0.295629       0.162000   -9999.000000       0.105300       0.087000
57274     57274     henan          112.2161       32.6403          109       169     2012      03        30        090              0.257500      18.237701       0.000000       0.293696       0.158000       0.106400       0.163100   -9999.000000
57274     57274     henan          112.2161       32.6403          109       169     2012      03        31        091              0.248000      14.851746       0.000000       0.288815       0.163000   -9999.000000       0.135400   -9999.000000
57274     57274     henan          112.2161       32.6403          109       169     2012      04        01        092              0.237958      16.793182       0.000000       0.279085       0.201000       0.105500       0.146600       0.003000
57274     57274     henan          112.2161       32.6403          109       169     2012      04        02        093              0.229375      18.862854       0.610330       0.274471       0.204000       0.033500   -9999.000000   -9999.000000
57274     57274     henan          112.2161       32.6403          109       169     2012      04        03        094              0.223208      15.003082       0.000000       0.275480       0.187000   -9999.000000   -9999.000000       0.060000
57274     57274     henan          112.2161       32.6403          109       169     2012      04        04        095              0.217083      16.054749       0.000000       0.270318       0.181000   -9999.000000       0.074000   -9999.000000
57274     57274     henan          112.2161       32.6403          109       169     2012      04        05        096              0.212375      16.705322       0.000000       0.266585       0.184000   -9999.000000       0.136200   -9999.000000
57274     57274     henan          112.2161       32.6403          109       169     2012      04        06        097              0.206792      17.634247       0.000000       0.263804       0.185500       0.131700       0.120900       0.044000
57274     57274     henan          112.2161       32.6403          109       169     2012      04        07        098              0.202458      19.642395       0.000000       0.255652       0.182000       0.024900       0.116900   -9999.000000
57274     57274     henan          112.2161       32.6403          109       169     2012      04        08        099              0.199042      18.626953       0.022132       0.253884   -9999.000000       0.234200   -9999.000000       0.030000
57274     57274     henan          112.2161       32.6403          109       169     2012      04        09        100              0.196250      20.921997       1.348611       0.245844       0.193000   -9999.000000       0.133100   -9999.000000
57274     57274     henan          112.2161       32.6403          109       169     2012      04        10        101              0.195750      17.194031       0.000000       0.263149       0.186500   -9999.000000       0.128700   -9999.000000
57274     57274     henan          112.2161       32.6403          109       169     2012      04        11        102              0.195708      19.847412       0.439145       0.257626       0.232000   -9999.000000       0.153200       0.020000
57274     57274     henan          112.2161       32.6403          109       169     2012      04        12        103              0.201833      21.128326      10.808771       0.252399   -9999.000000   -9999.000000       0.158300   -9999.000000
57274     57274     henan          112.2161       32.6403          109       169     2012      04        13        104              0.207167      13.054047       0.000000       0.320938   -9999.000000   -9999.000000   -9999.000000       0.038000
57274     57274     henan          112.2161       32.6403          109       169     2012      04        14        105              0.206667      18.402802       0.000000       0.291250       0.234000       0.054200   -9999.000000   -9999.000000
57274     57274     henan          112.2161       32.6403          109       169     2012      04        15        106              0.206333      15.656891       0.169193       0.284803       0.209500   -9999.000000       0.080500       0.017000
57274     57274     henan          112.2161       32.6403          109       169     2012      04        16        107              0.205792      17.734711       0.000000       0.279524       0.209500   -9999.000000       0.155900       0.002000
57274     57274     henan          112.2161       32.6403          109       169     2012      04        17        108              0.204708      19.738098       0.000000       0.272689       0.263000       0.056400       0.132600   -9999.000000
57274     57274     henan          112.2161       32.6403          109       169     2012      04        18        109              0.251208      19.328491       0.000000       0.267763   -9999.000000   -9999.000000   -9999.000000       0.047000
57274     57274     henan          112.2161       32.6403          109       169     2012      04        19        110              0.251583      21.426666       0.073259       0.257793       0.214000       0.030500   -9999.000000   -9999.000000
57274     57274     henan          112.2161       32.6403          109       169     2012      04        20        111              0.249958      24.051636       0.236140       0.248018       0.238500       0.059300       0.157700       0.029000
57274     57274     henan          112.2161       32.6403          109       169     2012      04        21        112              0.248708      19.776276       0.000000       0.251551       0.205500       0.047900       0.095000   -9999.000000
57274     57274     henan          112.2161       32.6403          109       169     2012      04        22        113              0.247917      20.819031       0.000000       0.246731       0.205000       0.181900       0.155400       0.173000
57274     57274     henan          112.2161       32.6403          109       169     2012      04        23        114              0.281958      23.898895      16.953760       0.235438       0.204000   -9999.000000       0.134800       0.402000
57274     57274     henan          112.2161       32.6403          109       169     2012      04        24        115              0.326833      24.814117       5.623926       0.297678       0.236000       0.134800       0.171100   -9999.000000
57274     57274     henan          112.2161       32.6403          109       169     2012      04        25        116              0.000000      19.652893       0.195020       0.329189       0.220000       0.070900   -9999.000000       0.089000
57274     57274     henan          112.2161       32.6403          109       169     2012      04        26        117              0.315583      19.026123       0.169303       0.302500       0.213500       0.307500       0.145400   -9999.000000
57274     57274     henan          112.2161       32.6403          109       169     2012      04        27        118              0.306833      21.538147       0.000000       0.287025       0.206000       0.260100   -9999.000000       0.139000
57274     57274     henan          112.2161       32.6403          109       169     2012      04        28        119              0.299000      24.021698       0.000000       0.274671       0.213000   -9999.000000       0.162800       0.109000
57274     57274     henan          112.2161       32.6403          109       169     2012      04        29        120              0.285708      23.755219       0.000000       0.267599   -9999.000000       0.160200       0.144100   -9999.000000
57274     57274     henan          112.2161       32.6403          109       169     2012      04        30        121              0.303625      23.286102      12.130665       0.256994       0.225000       0.239200   -9999.000000       0.537000
57274     57274     henan          112.2161       32.6403          109       169     2012      05        01        122              0.319667      20.692291       0.000000       0.314566       0.178000   -9999.000000   -9999.000000   -9999.000000
57274     57274     henan          112.2161       32.6403          109       169     2012      05        02        123              0.314167      21.813171       0.228021       0.303918       0.185000       0.112000       0.083500       0.205000
57274     57274     henan          112.2161       32.6403          109       169     2012      05        03        124              0.309208      23.382294       0.000000       0.289464       0.190000   -9999.000000       0.155600   -9999.000000
57274     57274     henan          112.2161       32.6403          109       169     2012      05        04        125              0.300125      23.175323       0.000000       0.283776   -9999.000000   -9999.000000       0.126700   -9999.000000
57274     57274     henan          112.2161       32.6403          109       169     2012      05        05        126              0.284350      25.028778       0.000000       0.268835       0.163000   -9999.000000       0.136700       0.172000
57274     57274     henan          112.2161       32.6403          109       169     2012      05        06        127              0.273333      26.336182       0.000000       0.253798       0.142500   -9999.000000   -9999.000000   -9999.000000
57274     57274     henan          112.2161       32.6403          109       169     2012      05        07        128              0.270792      28.132385       0.874201       0.242035   -9999.000000       0.048500       0.105500       0.248000
57274     57274     henan          112.2161       32.6403          109       169     2012      05        08        129              0.268250      24.406219       0.000000       0.255184       0.186000       0.177200       0.069600   -9999.000000
57274     57274     henan          112.2161       32.6403          109       169     2012      05        09        130              0.263292      26.506042       0.000000       0.245910       0.181000       0.260700       0.103900   -9999.000000
57274     57274     henan          112.2161       32.6403          109       169     2012      05        10        131              0.258750      26.295532       0.000000       0.236422       0.167000   -9999.000000       0.096500       0.291000
57274     57274     henan          112.2161       32.6403          109       169     2012      05        11        132              0.261250      27.862640      10.806728       0.223567       0.138000   -9999.000000       0.092500   -9999.000000
57274     57274     henan          112.2161       32.6403          109       169     2012      05        12        133              0.331958      28.055939       3.779365       0.241195       0.185500       0.229100   -9999.000000       0.449000
57274     57274     henan          112.2161       32.6403          109       169     2012      05        13        134              0.331125      20.005157       3.436384       0.312062       0.182000       0.193800       0.094700   -9999.000000
57274     57274     henan          112.2161       32.6403          109       169     2012      05        14        135              0.329667      22.513550       0.000000       0.298716       0.178000       0.125700       0.118700       0.254000
57274     57274     henan          112.2161       32.6403          109       169     2012      05        15        136              0.324542      23.476868       0.000000       0.282936   -9999.000000       0.174600       0.110900       0.389000
57274     57274     henan          112.2161       32.6403          109       169     2012      05        16        137              0.317500      24.936401       0.000000       0.264994       0.156000   -9999.000000       0.117300   -9999.000000
57274     57274     henan          112.2161       32.6403          109       169     2012      05        17        138              0.304167      26.707092       0.000000       0.249128       0.148500       0.113400   -9999.000000       0.242000
57274     57274     henan          112.2161       32.6403          109       169     2012      05        18        139              0.293958      28.169067       0.058778       0.230631       0.169000       0.280600   -9999.000000   -9999.000000
57274     57274     henan          112.2161       32.6403          109       169     2012      05        19        140              0.285625      25.249451       0.000000       0.226290       0.159000       0.229000       0.046800       0.226000
57274     57274     henan          112.2161       32.6403          109       169     2012      05        20        141              0.276875      27.988831       0.000000       0.214594   -9999.000000       0.133800       0.124300   -9999.000000
57274     57274     henan          112.2161       32.6403          109       169     2012      05        21        142              0.270500      28.060028       0.013214       0.203440       0.121000   -9999.000000       0.090900       0.364000
57274     57274     henan          112.2161       32.6403          109       169     2012      05        22        143              0.266125      25.882141       0.000000       0.201788       0.136000   -9999.000000       0.097000       0.207000
57274     57274     henan          112.2161       32.6403          109       169     2012      05        23        144              0.263667      23.841675       0.000000       0.203978   -9999.000000       0.189400   -9999.000000   -9999.000000
57274     57274     henan          112.2161       32.6403          109       169     2012      05        24        145              0.261750      23.903870       0.000000       0.204594       0.165000   -9999.000000       0.104700       0.197000
57274     57274     henan          112.2161       32.6403          109       169     2012      05        25        146              0.000000      22.728210       0.136450       0.205929   -9999.000000       0.176400       0.075700   -9999.000000
57274     57274     henan          112.2161       32.6403          109       169     2012      05        26        147              0.257625      21.836151       0.000000       0.208244       0.123000       0.037500       0.103900       0.221000
57274     57274     henan          112.2161       32.6403          109       169     2012      05        27        148              0.254542      28.063477       0.657779       0.196023       0.127500   -9999.000000       0.099500       0.064000
57274     57274     henan          112.2161       32.6403          109       169     2012      05        28        149              0.252500      26.865906       4.873343       0.192005       0.129000   -9999.000000   -9999.000000   -9999.000000
57274     57274     henan          112.2161       32.6403          109       169     2012      05        29        150              0.321583      28.414124      13.543250       0.202069   -9999.000000   -9999.000000   -9999.000000       0.598000
57274     57274     henan          112.2161       32.6403          109       169     2012      05        30        151              0.323583      21.118561       0.000000       0.323512       0.177000       0.191200       0.086500   -9999.000000
57274     57274     henan          112.2161       32.6403          109       169     2012      05        31        152              0.318208      26.711090       0.000000       0.280041       0.135000       0.043800   -9999.000000   -9999.000000
57274     57274     henan          112.2161       32.6403          109       169     2012      06        01        153              0.314958      25.446899       0.000000       0.264908       0.104000       0.302200       0.106800   -9999.000000
57274     57274     henan          112.2161       32.6403          109       169     2012      06        02        154              0.308542      23.712189       0.000000       0.257590       0.115000       0.201000       0.113000   -9999.000000
57274     57274     henan          112.2161       32.6403          109       169     2012      06        03        155              0.313250      26.608093       0.000000       0.239528       0.119000   -9999.000000   -9999.000000       0.384000
57274     57274     henan          112.2161       32.6403          109       169     2012      06        04        156              0.315000      26.045319       0.000000       0.229855       0.133000       0.080300   -9999.000000   -9999.000000
57274     57274     henan          112.2161       32.6403          109       169     2012      06        05        157              0.315875      27.866577       3.222497       0.217320   -9999.000000       0.217100       0.052200       0.701000
57274     57274     henan          112.2161       32.6403          109       169     2012      06        06        158              0.318625      26.655304       0.286491       0.240480       0.106000       0.275800       0.082500   -9999.000000
57274     57274     henan          112.2161       32.6403          109       169     2012      06        07        159              0.319333      26.876709       0.000000       0.240512       0.115000       0.026100       0.077700   -9999.000000
57274     57274     henan          112.2161       32.6403          109       169     2012      06        08        160              0.321250      29.438660       0.000000       0.219891       0.115000   -9999.000000       0.078000       0.402000
57274     57274     henan          112.2161       32.6403          109       169     2012      06        09        161              0.318042      32.542450       0.000000       0.200692       0.120000   -9999.000000   -9999.000000   -9999.000000
57274     57274     henan          112.2161       32.6403          109       169     2012      06        10        162              0.311667      34.124451       0.264898       0.190650   -9999.000000       0.178200       0.085800       0.413000
57274     57274     henan          112.2161       32.6403          109       169     2012      06        11        163              0.000000      32.072113       0.000000       0.189504       0.102000   -9999.000000       0.062300   -9999.000000
57274     57274     henan          112.2161       32.6403          109       169     2012      06        12        164              0.298792      31.243500       0.000000       0.186455       0.097000       0.281300       0.079600       0.280000
57274     57274     henan          112.2161       32.6403          109       169     2012      06        13        165              0.293750      34.508148       0.000000       0.181909       0.114000   -9999.000000       0.076700       0.433000
57274     57274     henan          112.2161       32.6403          109       169     2012      06        14        166              0.282458      35.349091       0.000000       0.180247       0.119000   -9999.000000   -9999.000000   -9999.000000
57274     57274     henan          112.2161       32.6403          109       169     2012      06        15        167              0.276583      31.997314       0.000000       0.181174   -9999.000000       0.164600   -9999.000000       0.424000
57274     57274     henan          112.2161       32.6403          109       169     2012      06        16        168              0.268125      33.671356       0.000000       0.178729       0.097000   -9999.000000       0.049400   -9999.000000
57274     57274     henan          112.2161       32.6403          109       169     2012      06        17        169              0.259833      33.217743       0.000000       0.178125       0.096000       0.093800       0.079900       0.414000
57274     57274     henan          112.2161       32.6403          109       169     2012      06        18        170              0.252875      32.759247       0.000000       0.177973       0.111500       0.074100       0.061900   -9999.000000
57274     57274     henan          112.2161       32.6403          109       169     2012      06        19        171              0.245083      33.940002       0.000000       0.177498       0.118000       0.112800       0.067500       0.402000
57274     57274     henan          112.2161       32.6403          109       169     2012      06        20        172              0.234958      34.634277       0.000000       0.177030       0.124000   -9999.000000   -9999.000000       0.333000
57274     57274     henan          112.2161       32.6403          109       169     2012      06        21        173              0.226625      34.582672       0.000000       0.175930       0.100000   -9999.000000   -9999.000000   -9999.000000
57274     57274     henan          112.2161       32.6403          109       169     2012      06        22        174              0.271875      35.216888       0.000000       0.175201       0.105000   -9999.000000       0.034500       0.442000
57274     57274     henan          112.2161       32.6403          109       169     2012      06        23        175              0.304875      36.123871       0.000000       0.175817       0.119500       0.127400       0.072700   -9999.000000
57274     57274     henan          112.2161       32.6403          109       169     2012      06        24        176              0.303042      36.169037       0.000000       0.175798       0.120000       0.135900       0.062900       0.451000
57274     57274     henan          112.2161       32.6403          109       169     2012      06        25        177              0.300125      35.360718       3.168810       0.175988       0.123000       0.316000       0.053700       0.451000
57274     57274     henan          112.2161       32.6403          109       169     2012      06        26        178              0.296524      32.027924       2.690763       0.206296   -9999.000000   -9999.000000   -9999.000000   -9999.000000
57274     57274     henan          112.2161       32.6403          109       169     2012      06        27        179              0.295833      30.199768       3.212085       0.214526       0.175000   -9999.000000       0.081600       0.591000
57274     57274     henan          112.2161       32.6403          109       169     2012      06        28        180              0.324250      27.169891       1.256837       0.222318       0.170500       0.197100       0.073700   -9999.000000
57274     57274     henan          112.2161       32.6403          109       169     2012      06        29        181              0.324875      26.157410       4.388596       0.252789       0.147000   -9999.000000       0.087900       0.649000
57274     57274     henan          112.2161       32.6403          109       169     2012      06        30        182              0.339958      29.160675      29.442608       0.239857   -9999.000000       0.213700       0.086500   -9999.000000
57274     57274     henan          112.2161       32.6403          109       169     2012      07        01        183              0.341333      25.193329      11.314373       0.354234   -9999.000000   -9999.000000   -9999.000000   -9999.000000
57274     57274     henan          112.2161       32.6403          109       169     2012      07        02        184              0.336417      26.634094       2.057619       0.354005       0.198000   -9999.000000   -9999.000000       0.733000
57274     57274     henan          112.2161       32.6403          109       169     2012      07        03        185              0.333917      27.134277       0.263195       0.330623       0.168000       0.254700       0.034000   -9999.000000
57274     57274     henan          112.2161       32.6403          109       169     2012      07        04        186              0.331750      29.578949      21.356009       0.314544       0.171000   -9999.000000       0.071100       0.767000
57274     57274     henan          112.2161       32.6403          109       169     2012      07        05        187              0.342708      28.716095      18.862427       0.344565       0.208000   -9999.000000       0.066800   -9999.000000
57274     57274     henan          112.2161       32.6403          109       169     2012      07        06        188              0.338667      26.676605       0.000000       0.377308   -9999.000000       0.361900       0.063000   -9999.000000
57274     57274     henan          112.2161       32.6403          109       169     2012      07        07        189              0.336500      29.313507      12.754936       0.344633   -9999.000000       0.175700   -9999.000000       0.685000
57274     57274     henan          112.2161       32.6403          109       169     2012      07        08        190              0.334500      30.712982       0.220611       0.353119       0.165000   -9999.000000   -9999.000000   -9999.000000
57274     57274     henan          112.2161       32.6403          109       169     2012      07        09        191              0.331542      31.646881       4.698169       0.342863       0.175500   -9999.000000       0.059800       0.716000
57274     57274     henan          112.2161       32.6403          109       169     2012      07        10        192              0.326000      32.240448       2.569596       0.337490       0.183500       0.243100       0.080900   -9999.000000
57274     57274     henan          112.2161       32.6403          109       169     2012      07        11        193              0.316167      30.623810       0.000000       0.329485       0.198000       0.201100       0.068300       0.657000
57274     57274     henan          112.2161       32.6403          109       169     2012      07        12        194              0.306542      33.034027       0.399157       0.312575   -9999.000000       0.270600       0.064700       0.631000
57274     57274     henan          112.2161       32.6403          109       169     2012      07        13        195              0.302375      31.135803       5.824939       0.306441       0.205000   -9999.000000   -9999.000000   -9999.000000
57274     57274     henan          112.2161       32.6403          109       169     2012      07        14        196              0.299667      28.114563       3.735680       0.328053       0.193000   -9999.000000       0.067000       0.741000
57274     57274     henan          112.2161       32.6403          109       169     2012      07        15        197              0.294208      27.952881       2.288482       0.325159       0.209500   -9999.000000       0.065400   -9999.000000
57274     57274     henan          112.2161       32.6403          109       169     2012      07        16        198              0.288583      28.850861       0.000000       0.310960       0.189000   -9999.000000       0.057200       0.617000
57274     57274     henan          112.2161       32.6403          109       169     2012      07        17        199              0.280250      28.979401       0.000000       0.303060   -9999.000000       0.185900       0.051000   -9999.000000
57274     57274     henan          112.2161       32.6403          109       169     2012      07        18        200              0.272292      29.460266       0.000000       0.290835       0.179000       0.219000   -9999.000000       0.578000
57274     57274     henan          112.2161       32.6403          109       169     2012      07        19        201              0.262917      30.087555       0.000000       0.280587       0.160000   -9999.000000   -9999.000000       0.529000
57274     57274     henan          112.2161       32.6403          109       169     2012      07        20        202              0.261042      31.513885       8.184597       0.268123       0.176000   -9999.000000       0.034700   -9999.000000
57274     57274     henan          112.2161       32.6403          109       169     2012      07        21        203              0.274083      32.038849       8.796643       0.291445       0.277000       0.459200       0.060300       0.696000
57274     57274     henan          112.2161       32.6403          109       169     2012      07        22        204              0.270125      32.218933       0.000000       0.305634       0.283000   -9999.000000       0.048400   -9999.000000
57274     57274     henan          112.2161       32.6403          109       169     2012      07        23        205              0.263833      30.643677       0.000000       0.315960       0.246000       0.285400       0.084400       0.615000
57274     57274     henan          112.2161       32.6403          109       169     2012      07        24        206              0.265000      31.543732       3.855912       0.289501       0.325000       0.089400   -9999.000000       0.658000
57274     57274     henan          112.2161       32.6403          109       169     2012      07        25        207              0.265000      30.188385       0.000000       0.306912       0.276500       0.129300       0.092400   -9999.000000
57274     57274     henan          112.2161       32.6403          109       169     2012      07        26        208              0.257875      32.752228       0.000000       0.286069       0.255500       0.163100       0.067800       0.662000
57274     57274     henan          112.2161       32.6403          109       169     2012      07        27        209              0.248833      33.270233       0.000000       0.268366       0.241000   -9999.000000       0.090700   -9999.000000
57274     57274     henan          112.2161       32.6403          109       169     2012      07        28        210              0.240208      33.232788       0.000000       0.252639   -9999.000000       0.072600       0.079900       0.621000
57274     57274     henan          112.2161       32.6403          109       169     2012      07        29        211              0.232333      33.874023       0.000000       0.239625       0.241000   -9999.000000   -9999.000000   -9999.000000
57274     57274     henan          112.2161       32.6403          109       169     2012      07        30        212              0.224125      34.346191       0.395448       0.230062       0.218000       0.122000   -9999.000000   -9999.000000
57274     57274     henan          112.2161       32.6403          109       169     2012      07        31        213              0.216958      34.325348       7.942557       0.221818       0.239000       0.195500       0.096100       0.840000
57274     57274     henan          112.2161       32.6403          109       169     2012      08        01        214              0.210292      33.142578       0.000000       0.261239       0.302000   -9999.000000       0.102400   -9999.000000
57274     57274     henan          112.2161       32.6403          109       169     2012      08        02        215              0.206042      31.098511       0.000000       0.267980   -9999.000000       0.113200       0.083400       0.560000
57274     57274     henan          112.2161       32.6403          109       169     2012      08        03        216              0.200917      32.071350       0.000000       0.244231       0.297000       0.117500       0.091700   -9999.000000
57274     57274     henan          112.2161       32.6403          109       169     2012      08        04        217              0.196708      31.110382       1.330007       0.233362       0.347000       0.146600   -9999.000000   -9999.000000
57274     57274     henan          112.2161       32.6403          109       169     2012      08        05        218              0.194000      30.901978       0.944295       0.230158       0.329500       0.034400   -9999.000000       0.684000
57274     57274     henan          112.2161       32.6403          109       169     2012      08        06        219              0.189792      30.969666       0.000000       0.230343       0.332000   -9999.000000       0.070500   -9999.000000
57274     57274     henan          112.2161       32.6403          109       169     2012      08        07        220              0.185667      31.955658       0.000000       0.213616       0.324000   -9999.000000       0.102700       0.533000
57274     57274     henan          112.2161       32.6403          109       169     2012      08        08        221              0.180125      33.168121       0.000000       0.201676   -9999.000000       0.147200       0.106000   -9999.000000
57274     57274     henan          112.2161       32.6403          109       169     2012      08        09        222              0.177917      33.208862       0.000000       0.193482       0.293000   -9999.000000       0.114000       0.401000
57274     57274     henan          112.2161       32.6403          109       169     2012      08        10        223              0.172130      34.441589       0.000000       0.186826       0.288000       0.302600   -9999.000000       0.606000
57274     57274     henan          112.2161       32.6403          109       169     2012      08        11        224              0.167542      34.623535       0.000000       0.183500       0.308500       0.134000       0.125700   -9999.000000
57274     57274     henan          112.2161       32.6403          109       169     2012      08        12        225              0.165708      34.566895       0.951807       0.182503       0.303000   -9999.000000       0.101000       0.400000
57274     57274     henan          112.2161       32.6403          109       169     2012      08        13        226              0.159792      35.363312       0.206291       0.183022   -9999.000000       0.135400       0.100700   -9999.000000
57274     57274     henan          112.2161       32.6403          109       169     2012      08        14        227              0.161375      30.353607       0.758770       0.183716       0.313000   -9999.000000       0.097200       0.470000
57274     57274     henan          112.2161       32.6403          109       169     2012      08        15        228              0.167250      31.372833       1.704919       0.183365       0.306000       0.079500   -9999.000000   -9999.000000
57274     57274     henan          112.2161       32.6403          109       169     2012      08        16        229              0.167292      31.056610       0.000000       0.185535       0.300500       0.171800   -9999.000000       0.431000
57274     57274     henan          112.2161       32.6403          109       169     2012      08        17        230              0.164792      32.266174       0.000000       0.178485       0.344500   -9999.000000       0.077400       0.381000
57274     57274     henan          112.2161       32.6403          109       169     2012      08        18        231              0.163708      34.448730       0.000000       0.175070       0.314000       0.125600       0.096300   -9999.000000
57274     57274     henan          112.2161       32.6403          109       169     2012      08        19        232              0.186417      35.390839      25.070427       0.174418   -9999.000000   -9999.000000       0.084700       0.605000
57274     57274     henan          112.2161       32.6403          109       169     2012      08        20        233              0.301417      33.588806      21.128418       0.269706   -9999.000000       0.332600       0.148100   -9999.000000
57274     57274     henan          112.2161       32.6403          109       169     2012      08        21        234              0.324083      28.010040       2.528781       0.354028       0.301000       0.184700   -9999.000000       0.788000
57274     57274     henan          112.2161       32.6403          109       169     2012      08        22        235              0.316417      27.671936       8.941158       0.331400       0.289000       0.304200   -9999.000000   -9999.000000
57274     57274     henan          112.2161       32.6403          109       169     2012      08        23        236              0.309792      24.948059       0.000000       0.308427       0.251000       0.123900       0.088100   -9999.000000
57274     57274     henan          112.2161       32.6403          109       169     2012      08        24        237              0.302000      25.351654       0.000000       0.289280   -9999.000000   -9999.000000       0.148100       0.546000
57274     57274     henan          112.2161       32.6403          109       169     2012      08        25        238              0.000000      26.664764       0.000000       0.275266       0.255000   -9999.000000       0.115800   -9999.000000
57274     57274     henan          112.2161       32.6403          109       169     2012      08        26        239              0.285708      27.672302       3.084545       0.264605       0.274000       0.168500       0.136800       0.610000
57274     57274     henan          112.2161       32.6403          109       169     2012      08        27        240              0.279917      26.011566       2.354282       0.262287       0.242500   -9999.000000   -9999.000000   -9999.000000
57274     57274     henan          112.2161       32.6403          109       169     2012      08        28        241              0.272000      27.842560       0.000000       0.253548       0.258000       0.108000       0.114500   -9999.000000
57274     57274     henan          112.2161       32.6403          109       169     2012      08        29        242              0.264292      29.705872       0.000000       0.240269       0.243000   -9999.000000       0.104400       0.609000
57274     57274     henan          112.2161       32.6403          109       169     2012      08        30        243              0.257750      31.357635       0.156486       0.227528       0.235000       0.066500       0.115000   -9999.000000
57274     57274     henan          112.2161       32.6403          109       169     2012      08        31        244              0.252708      31.746277       0.370598       0.217723       0.260000       0.125900       0.119400       0.539000
57274     57274     henan          112.2161       32.6403          109       169     2012      09        01        245              0.251875      28.479156      11.341329       0.220932       0.238000   -9999.000000   -9999.000000   -9999.000000
57274     57274     henan          112.2161       32.6403          109       169     2012      09        02        246              0.259958      30.086029       0.125343       0.256162       0.241500       0.226000   -9999.000000   -9999.000000
57274     57274     henan          112.2161       32.6403          109       169     2012      09        03        247              0.254000      25.639343       0.000000       0.279956       0.211000       0.182100       0.077100       0.552000
57274     57274     henan          112.2161       32.6403          109       169     2012      09        04        248              0.248125      27.537048       0.000000       0.252240   -9999.000000       0.166400       0.117100   -9999.000000
57274     57274     henan          112.2161       32.6403          109       169     2012      09        05        249              0.242542      28.115265       0.000000       0.234675       0.216000       0.136000       0.094600       0.486000
57274     57274     henan          112.2161       32.6403          109       169     2012      09        06        250              0.237833      28.492554       0.000000       0.221897       0.232000   -9999.000000       0.105600   -9999.000000
57274     57274     henan          112.2161       32.6403          109       169     2012      09        07        251              0.278000      26.316132     113.339081       0.218938       0.219000   -9999.000000   -9999.000000       0.461000
57274     57274     henan          112.2161       32.6403          109       169     2012      09        08        252              0.350000      28.200714      11.102080       0.333468       0.311000       0.522000   -9999.000000       0.915000
57274     57274     henan          112.2161       32.6403          109       169     2012      09        09        253              0.342208      24.053131       0.000000       0.429243   -9999.000000       0.289200       0.090800   -9999.000000
57274     57274     henan          112.2161       32.6403          109       169     2012      09        10        254              0.338500      25.202942       0.000000       0.364935       0.242000       0.180000       0.152600       0.638000
57274     57274     henan          112.2161       32.6403          109       169     2012      09        11        255              0.347522      25.057831      31.834969       0.353325       0.213000   -9999.000000       0.164000   -9999.000000
57274     57274     henan          112.2161       32.6403          109       169     2012      09        12        256              0.343833      23.215027       0.381730       0.397270       0.198000   -9999.000000       0.150400       0.811000
57274     57274     henan          112.2161       32.6403          109       169     2012      09        13        257              0.338417      21.685516       0.000000       0.369051       0.199000       0.186700   -9999.000000   -9999.000000
57274     57274     henan          112.2161       32.6403          109       169     2012      09        14        258              0.334250      21.730225       0.000000       0.354237       0.182000   -9999.000000       0.132200       0.675000
57274     57274     henan          112.2161       32.6403          109       169     2012      09        15        259              0.330667      21.995331       0.000000       0.345278   -9999.000000       0.208500       0.128400       0.545000
57274     57274     henan          112.2161       32.6403          109       169     2012      09        16        260              0.326542      22.797760       0.000000       0.337978       0.178000       0.154600       0.143700   -9999.000000
57274     57274     henan          112.2161       32.6403          109       169     2012      09        17        261              0.321292      22.738708       0.000000       0.332408       0.189500   -9999.000000       0.123200       0.653000
57274     57274     henan          112.2161       32.6403          109       169     2012      09        18        262              0.316292      23.222534       0.000000       0.327322       0.192500   -9999.000000   -9999.000000   -9999.000000
57274     57274     henan          112.2161       32.6403          109       169     2012      09        19        263              0.309625      24.156921       0.000000       0.322593       0.190000   -9999.000000   -9999.000000       0.573000
57274     57274     henan          112.2161       32.6403          109       169     2012      09        20        264              0.304292      24.939545       0.199966       0.317378   -9999.000000       0.202600       0.074400       0.488000
57274     57274     henan          112.2161       32.6403          109       169     2012      09        21        265              0.299750      25.042419       0.000000       0.313636   -9999.000000       0.080600       0.138100   -9999.000000
57274     57274     henan          112.2161       32.6403          109       169     2012      09        22        266              0.297000      25.009399       0.000000       0.311276       0.144500   -9999.000000       0.121200       0.584000
57274     57274     henan          112.2161       32.6403          109       169     2012      09        23        267              0.290957      25.550476       0.000000       0.308346       0.152500       0.167000       0.135500   -9999.000000
57274     57274     henan          112.2161       32.6403          109       169     2012      09        24        268              0.285792      24.762787       0.000000       0.304699       0.177000   -9999.000000   -9999.000000       0.493000
57274     57274     henan          112.2161       32.6403          109       169     2012      09        25        269              0.282417      25.006348       0.210066       0.299185       0.186000       0.183800       0.123600   -9999.000000
57274     57274     henan          112.2161       32.6403          109       169     2012      09        26        270              0.281292      23.850250       0.200599       0.301419       0.162000       0.261700       0.097700   -9999.000000
57274     57274     henan          112.2161       32.6403          109       169     2012      09        27        271              0.278500      23.039886       0.000000       0.302580       0.148000       0.182700       0.120800       0.539000
57274     57274     henan          112.2161       32.6403          109       169     2012      09        28        272              0.269333      24.539337       0.000000       0.296063       0.161500   -9999.000000       0.120200   -9999.000000
57274     57274     henan          112.2161       32.6403          109       169     2012      09        29        273              0.267417      21.198303       0.000000       0.286836       0.165500   -9999.000000       0.117100       0.448000
57274     57274     henan          112.2161       32.6403          109       169     2012      09        30        274              0.263875      21.200684       0.000000       0.282193       0.178000   -9999.000000   -9999.000000   -9999.000000
57274     57274     henan          112.2161       32.6403          109       169     2012      10        01        275              0.259958      21.323975       0.000000       0.278606   -9999.000000   -9999.000000       0.076400   -9999.000000
57274     57274     henan          112.2161       32.6403          109       169     2012      10        02        276              0.257292      21.402008       0.158176       0.273761       0.150000   -9999.000000       0.090500       0.437000
57274     57274     henan          112.2161       32.6403          109       169     2012      10        03        277              0.254542      22.327332       0.000000       0.272029       0.139500       0.076500       0.080900   -9999.000000
57274     57274     henan          112.2161       32.6403          109       169     2012      10        04        278              0.252000      22.747589       0.000000       0.267271       0.155000   -9999.000000       0.089200       0.396000
57274     57274     henan          112.2161       32.6403          109       169     2012      10        05        279              0.250875      22.431824       0.047970       0.267986       0.166000   -9999.000000   -9999.000000   -9999.000000
57274     57274     henan          112.2161       32.6403          109       169     2012      10        06        280              0.249167      21.257782       0.000000       0.270088   -9999.000000   -9999.000000   -9999.000000       0.329000
57274     57274     henan          112.2161       32.6403          109       169     2012      10        07        281              0.247708      20.889832       0.346333       0.269241       0.150000   -9999.000000       0.041800       0.398000
57274     57274     henan          112.2161       32.6403          109       169     2012      10        08        282              0.247250      21.200714       0.122160       0.270136       0.150500       0.201600       0.081200   -9999.000000
57274     57274     henan          112.2161       32.6403          109       169     2012      10        09        283              0.246792      21.671234       0.000000       0.268587       0.157500       0.060300       0.069700       0.361000
57274     57274     henan          112.2161       32.6403          109       169     2012      10        10        284              0.243652      22.078918       0.000000       0.262206       0.157000       0.129600       0.074900   -9999.000000
57274     57274     henan          112.2161       32.6403          109       169     2012      10        11        285              0.241042      20.943481       0.000000       0.255817       0.148000       0.073200   -9999.000000       0.406000
57274     57274     henan          112.2161       32.6403          109       169     2012      10        12        286              0.238542      20.425476       0.056801       0.256775   -9999.000000   -9999.000000       0.081000   -9999.000000
57274     57274     henan          112.2161       32.6403          109       169     2012      10        13        287              0.239042      19.711884       0.000000       0.260585       0.124000       0.157000       0.059500       0.409000
57274     57274     henan          112.2161       32.6403          109       169     2012      10        14        288              0.236417      20.786072       0.000000       0.257487       0.141000       0.225600       0.080300       0.337000
57274     57274     henan          112.2161       32.6403          109       169     2012      10        15        289              0.234750      20.804199       3.451094       0.254910       0.183500       0.251100       0.106400   -9999.000000
57274     57274     henan          112.2161       32.6403          109       169     2012      10        16        290              0.241458      20.035278       0.955953       0.269009       0.187000       0.171600   -9999.000000       0.509000
57274     57274     henan          112.2161       32.6403          109       169     2012      10        17        291              0.245250      16.652100       0.000000       0.282527   -9999.000000   -9999.000000   -9999.000000   -9999.000000
57274     57274     henan          112.2161       32.6403          109       169     2012      10        18        292              0.247708      17.384033       0.000000       0.268587       0.133000       0.188700       0.062800       0.430000
57274     57274     henan          112.2161       32.6403          109       169     2012      10        19        293              0.248583      18.919006       0.000000       0.264679       0.129000       0.126800       0.085900       0.368000
57274     57274     henan          112.2161       32.6403          109       169     2012      10        20        294              0.250083      19.983612       0.000000       0.260698       0.134000   -9999.000000       0.072000   -9999.000000
57274     57274     henan          112.2161       32.6403          109       169     2012      10        21        295              0.249625      21.391296       4.897679       0.256944       0.165000       0.126800       0.082700       0.924000
57274     57274     henan          112.2161       32.6403          109       169     2012      10        22        296              0.248583      19.923126       0.000000       0.282147   -9999.000000   -9999.000000   -9999.000000   -9999.000000
57274     57274     henan          112.2161       32.6403          109       169     2012      10        23        297              0.248208      16.792816       0.786497       0.282073   -9999.000000   -9999.000000   -9999.000000       0.744000
57274     57274     henan          112.2161       32.6403          109       169     2012      10        24        298              0.250042      16.508514       0.000000       0.277703   -9999.000000       0.275700       0.041300   -9999.000000
57274     57274     henan          112.2161       32.6403          109       169     2012      10        25        299              0.000000      17.511078       0.235076       0.273071       0.164000   -9999.000000       0.096900   -9999.000000
57274     57274     henan          112.2161       32.6403          109       169     2012      10        26        300              0.248042      18.904999       0.279283       0.269445       0.174500       0.273800       0.089800       0.580000
57274     57274     henan          112.2161       32.6403          109       169     2012      10        27        301              0.247333      16.163635       0.000000       0.272698       0.171000       0.140800       0.085000   -9999.000000
57274     57274     henan          112.2161       32.6403          109       169     2012      10        28        302              0.000000      18.710388       0.307755       0.267929   -9999.000000   -9999.000000   -9999.000000       0.493000
57274     57274     henan          112.2161       32.6403          109       169     2012      10        29        303              0.245958      18.830475       6.350406       0.267429       0.186000       0.213600       0.121200   -9999.000000
57274     57274     henan          112.2161       32.6403          109       169     2012      10        30        304              0.246292      16.053497       0.000000       0.305158       0.150000   -9999.000000       0.093800   -9999.000000
57274     57274     henan          112.2161       32.6403          109       169     2012      10        31        305              0.250000      15.141052       0.000000       0.292085       0.155500       0.362500       0.102400       0.417000
57274     57274     henan          112.2161       32.6403          109       169     2012      11        01        306              0.250583      14.628967       0.000000       0.282483       0.140000       0.261300       0.096500   -9999.000000
57274     57274     henan          112.2161       32.6403          109       169     2012      11        02        307              0.255542      14.819916      22.705462       0.280195   -9999.000000       0.208600   -9999.000000       0.432000
57274     57274     henan          112.2161       32.6403          109       169     2012      11        03        308              0.324000      16.358124      18.404448       0.301070   -9999.000000       0.238200   -9999.000000   -9999.000000
57274     57274     henan          112.2161       32.6403          109       169     2012      11        04        309              0.318542      11.251648       0.000000       0.374647       0.144000   -9999.000000       0.067300       0.819000
57274     57274     henan          112.2161       32.6403          109       169     2012      11        05        310              0.319125      10.340210       0.000000       0.343769       0.155000       0.256200       0.098700       0.454000
57274     57274     henan          112.2161       32.6403          109       169     2012      11        06        311              0.318583      10.578827       0.065469       0.333413       0.152500       0.214800       0.081600   -9999.000000
57274     57274     henan          112.2161       32.6403          109       169     2012      11        07        312              0.316750      11.831604       0.283281       0.327696       0.160000   -9999.000000       0.096700       0.614000
57274     57274     henan          112.2161       32.6403          109       169     2012      11        08        313              0.315792      12.091705       0.000000       0.326144   -9999.000000       0.096200   -9999.000000   -9999.000000
57274     57274     henan          112.2161       32.6403          109       169     2012      11        09        314              0.314833      12.357544       5.566427       0.324151       0.187000       0.193500   -9999.000000       0.861000
57274     57274     henan          112.2161       32.6403          109       169     2012      11        10        315              0.314167      11.575439       0.000000       0.338753       0.179000       0.135000       0.062900   -9999.000000
57274     57274     henan          112.2161       32.6403          109       169     2012      11        11        316              0.314500      10.901581       0.000000       0.330219       0.127000   -9999.000000       0.098500       0.566000
57274     57274     henan          112.2161       32.6403          109       169     2012      11        12        317              0.307167      10.175385       0.000000       0.322778       0.133000   -9999.000000       0.088600       0.364000
57274     57274     henan          112.2161       32.6403          109       169     2012      11        13        318              0.000000      11.067902       0.000000       0.319417   -9999.000000       0.141200       0.083000   -9999.000000
57274     57274     henan          112.2161       32.6403          109       169     2012      11        14        319              0.300875      11.774567       0.000000       0.316271       0.113000       0.123300   -9999.000000       0.361000
57274     57274     henan          112.2161       32.6403          109       169     2012      11        15        320              0.299500       8.977478       4.555875       0.315269       0.099000       0.225700       0.092200   -9999.000000
57274     57274     henan          112.2161       32.6403          109       169     2012      11        16        321              0.300652       8.704346       0.000000       0.328438       0.116000       0.228600       0.080200       0.382000
57274     57274     henan          112.2161       32.6403          109       169     2012      11        17        322              0.000000      10.587860       0.384608       0.323355       0.129000   -9999.000000       0.095700       0.314000
57274     57274     henan          112.2161       32.6403          109       169     2012      11        18        323              0.298667      10.036316       0.000000       0.320975       0.138000       0.112600       0.087000   -9999.000000
57274     57274     henan          112.2161       32.6403          109       169     2012      11        19        324              0.297708       9.577576       0.057199       0.319383       0.114000       0.147400   -9999.000000       0.374000
57274     57274     henan          112.2161       32.6403          109       169     2012      11        20        325              0.296583      10.529938       0.233098       0.316725       0.130000       0.111900   -9999.000000   -9999.000000
57274     57274     henan          112.2161       32.6403          109       169     2012      11        21        326              0.297792       9.402679       0.174290       0.316310       0.127000       0.165600       0.032500       0.386000
57274     57274     henan          112.2161       32.6403          109       169     2012      11        22        327              0.295750      10.833221       0.000000       0.314687       0.130500   -9999.000000       0.076500   -9999.000000
57274     57274     henan          112.2161       32.6403          109       169     2012      11        23        328              0.293167       9.140350       0.000000       0.314849       0.139000   -9999.000000       0.060900   -9999.000000
57274     57274     henan          112.2161       32.6403          109       169     2012      11        24        329              0.291875       6.979065       4.850957       0.311665   -9999.000000       0.086500       0.074900       0.482000
57274     57274     henan          112.2161       32.6403          109       169     2012      11        25        330              0.311625       7.129669       4.982552       0.318642   -9999.000000       0.123100   -9999.000000   -9999.000000
57274     57274     henan          112.2161       32.6403          109       169     2012      11        26        331              0.309375       7.414551       0.000000       0.343960       0.112000       0.157200   -9999.000000       0.391000
57274     57274     henan          112.2161       32.6403          109       169     2012      11        27        332              0.308167       6.942139       0.243331       0.327182       0.124000       0.182900       0.057900   -9999.000000
57274     57274     henan          112.2161       32.6403          109       169     2012      11        28        333              0.306042       8.087158       0.000000       0.323240       0.130000       0.142400       0.083800   -9999.000000
57274     57274     henan          112.2161       32.6403          109       169     2012      11        29        334              0.304208       6.981659       0.444561       0.320771   -9999.000000       0.245800       0.080300       0.421000
57274     57274     henan          112.2161       32.6403          109       169     2012      11        30        335              0.303958       6.113739       0.790552       0.320450       0.125000   -9999.000000   -9999.000000   -9999.000000
57274     57274     henan          112.2161       32.6403          109       169     2012      12        01        336              0.302000       6.718445       1.829268       0.319897   -9999.000000       0.232200   -9999.000000       0.684000
57274     57274     henan          112.2161       32.6403          109       169     2012      12        02        337              0.302000       3.965576       0.000000       0.328306   -9999.000000       0.148700       0.065600   -9999.000000
57274     57274     henan          112.2161       32.6403          109       169     2012      12        03        338              0.303250       4.458527       0.000000       0.323623       0.131000   -9999.000000       0.088600       0.461000
57274     57274     henan          112.2161       32.6403          109       169     2012      12        04        339              0.301333       5.648010       0.000000       0.319771       0.143000       0.263300       0.068400       0.365000
57274     57274     henan          112.2161       32.6403          109       169     2012      12        05        340              0.302167       4.506409       0.000000       0.318729   -9999.000000   -9999.000000       0.080200   -9999.000000
57274     57274     henan          112.2161       32.6403          109       169     2012      12        06        341              0.302312       6.535553       0.000000       0.315457   -9999.000000       0.264900   -9999.000000       0.283000
57274     57274     henan          112.2161       32.6403          109       169     2012      12        07        342              0.301583       6.482452       0.000000       0.313865       0.129000       0.126500   -9999.000000   -9999.000000
57274     57274     henan          112.2161       32.6403          109       169     2012      12        08        343              0.300250       6.931030       0.000000       0.311980       0.121000       0.124200       0.033100       0.253000
57274     57274     henan          112.2161       32.6403          109       169     2012      12        09        344              0.299125       5.771545       0.000000       0.310360       0.125000       0.162800       0.082700   -9999.000000
57274     57274     henan          112.2161       32.6403          109       169     2012      12        10        345              0.297500       5.137146       0.117285       0.309183   -9999.000000   -9999.000000       0.054600       0.200000
57274     57274     henan          112.2161       32.6403          109       169     2012      12        11        346              0.294375       3.583893       0.431240       0.299922   -9999.000000   -9999.000000       0.063500       0.258000
57274     57274     henan          112.2161       32.6403          109       169     2012      12        12        347              0.292708       3.483765       0.661664       0.300558       0.116000   -9999.000000   -9999.000000   -9999.000000
57274     57274     henan          112.2161       32.6403          109       169     2012      12        13        348              0.293917       2.989624       7.462219       0.307728   -9999.000000       0.232500       0.084100       0.685000
57274     57274     henan          112.2161       32.6403          109       169     2012      12        14        349              0.295833       2.325409       0.000000       0.336045   -9999.000000       0.105700       0.063000   -9999.000000
57274     57274     henan          112.2161       32.6403          109       169     2012      12        15        350              0.000000       3.258423       0.000000       0.325576   -9999.000000   -9999.000000       0.082300       0.468000
57274     57274     henan          112.2161       32.6403          109       169     2012      12        16        351              0.295667       3.288452       0.000000       0.323814       0.136000       0.194900       0.075400       0.443000
57274     57274     henan          112.2161       32.6403          109       169     2012      12        17        352              0.298458       4.612457       3.065906       0.322370   -9999.000000       0.310300   -9999.000000   -9999.000000
57274     57274     henan          112.2161       32.6403          109       169     2012      12        18        353              0.300042       3.761566       0.000000       0.328618   -9999.000000   -9999.000000   -9999.000000       0.489000
57274     57274     henan          112.2161       32.6403          109       169     2012      12        19        354              0.299625       3.102356       1.321848       0.317841   -9999.000000       0.132900       0.052600   -9999.000000
57274     57274     henan          112.2161       32.6403          109       169     2012      12        20        355              0.000000       3.324432       0.000000       0.319567   -9999.000000       0.174900       0.072200       0.628000
57274     57274     henan          112.2161       32.6403          109       169     2012      12        21        356              0.302208       1.214142       0.458849       0.297974   -9999.000000   -9999.000000       0.069400   -9999.000000
57274     57274     henan          112.2161       32.6403          109       169     2012      12        22        357              0.301125       1.799713       0.128912       0.292766   -9999.000000   -9999.000000       0.071000   -9999.000000
57274     57274     henan          112.2161       32.6403          109       169     2012      12        23        358              0.299792       2.731842       0.000000       0.297277       0.109000   -9999.000000   -9999.000000       0.219000
57274     57274     henan          112.2161       32.6403          109       169     2012      12        24        359              0.298048       1.206543       0.232416       0.264638       0.126000       0.146400   -9999.000000   -9999.000000
57274     57274     henan          112.2161       32.6403          109       169     2012      12        25        360              0.296292       1.727875       0.000000       0.271885   -9999.000000       0.196500       0.039800       0.232000
57274     57274     henan          112.2161       32.6403          109       169     2012      12        26        361              0.000000       1.158875       0.000000       0.267469   -9999.000000       0.150600       0.092000   -9999.000000
57274     57274     henan          112.2161       32.6403          109       169     2012      12        27        362              0.297091       0.456268       0.154957       0.252794   -9999.000000   -9999.000000       0.095900   -9999.000000
57274     57274     henan          112.2161       32.6403          109       169     2012      12        28        363              0.297000       1.461731       0.129766       0.280921   -9999.000000   -9999.000000       0.094600       0.385000
57274     57274     henan          112.2161       32.6403          109       169     2012      12        29        364              0.000000       1.307068       0.000000       0.287553   -9999.000000   -9999.000000   -9999.000000   -9999.000000
57274     57274     henan          112.2161       32.6403          109       169     2012      12        30        365              0.000000       0.733551       0.961901       0.259135       0.114000       0.141000       0.074600       0.110000
57274     57274     henan          112.2161       32.6403          109       169     2012      12        31        366              0.294400       0.669312       0.000000       0.247717       0.122000       0.094000       0.081300   -9999.000000
