# Supplementary material for: Research on Fusing Multisatellite Soil Moisture Data Based on Bayesian Model Averaging
Source: Hindawi journal article supplement (doi:10.1155/2018/9310838), 2018-06-25
Supplement: f1 [file 9310838.f1.zip › 2012_sm00-10cm_daily_ZDB_ZHY_57293_366days_allin.txt]

57293     57293     henan          114.9753       32.7369          109       180     2012      01        01        001              0.000000   -9999.000000       0.041856   -9999.000000       0.091000   -9999.000000       0.125900   -9999.000000
57293     57293     henan          114.9753       32.7369          109       180     2012      01        02        002              0.237000       0.879456       0.000000       0.295291       0.093000   -9999.000000       0.148700   -9999.000000
57293     57293     henan          114.9753       32.7369          109       180     2012      01        03        003              0.000000       1.307739       0.000000       0.302984       0.095000       0.060300   -9999.000000       0.152000
57293     57293     henan          114.9753       32.7369          109       180     2012      01        04        004              0.236000       0.316254       0.000000       0.269659       0.097000   -9999.000000   -9999.000000   -9999.000000
57293     57293     henan          114.9753       32.7369          109       180     2012      01        05        005              0.236000       0.061829       0.000000       0.255649   -9999.000000       0.134600       0.072200       0.231000
57293     57293     henan          114.9753       32.7369          109       180     2012      01        06        006              0.235625       0.269806       0.000000       0.252566   -9999.000000   -9999.000000       0.130400       0.143000
57293     57293     henan          114.9753       32.7369          109       180     2012      01        07        007              0.235167       0.826172       0.000000       0.267961       0.095000   -9999.000000       0.152000   -9999.000000
57293     57293     henan          114.9753       32.7369          109       180     2012      01        08        008              0.000000       1.545166       0.000000       0.298636       0.092000       0.058200       0.146000       0.074000
57293     57293     henan          114.9753       32.7369          109       180     2012      01        09        009              0.233667       1.853424       0.000000       0.296857       0.096000   -9999.000000   -9999.000000   -9999.000000
57293     57293     henan          114.9753       32.7369          109       180     2012      01        10        010              0.234167       1.966553       0.037669       0.301394   -9999.000000       0.074200       0.093700       0.213000
57293     57293     henan          114.9753       32.7369          109       180     2012      01        11        011              0.232625       1.190338       0.000000       0.301145   -9999.000000       0.041500       0.066500       0.149000
57293     57293     henan          114.9753       32.7369          109       180     2012      01        12        012              0.232000       1.819763       0.000000       0.296017   -9999.000000       0.115700       0.073700       0.419000
57293     57293     henan          114.9753       32.7369          109       180     2012      01        13        013              0.232000       0.812561       0.000000       0.287478       0.125000       0.061900       0.087900       0.253000
57293     57293     henan          114.9753       32.7369          109       180     2012      01        14        014              0.232000       1.364410       0.000000       0.306724       0.132000   -9999.000000   -9999.000000   -9999.000000
57293     57293     henan          114.9753       32.7369          109       180     2012      01        15        015              0.232000       1.670441       0.000000       0.319872   -9999.000000       0.077600   -9999.000000       0.251000
57293     57293     henan          114.9753       32.7369          109       180     2012      01        16        016              0.232000       2.866730      10.491210       0.331524       0.138000       0.030300       0.065200   -9999.000000
57293     57293     henan          114.9753       32.7369          109       180     2012      01        17        017              0.000000       3.263153       4.591466       0.338140       0.132000       0.058000       0.087400       0.726000
57293     57293     henan          114.9753       32.7369          109       180     2012      01        18        018              0.233583       3.222504       2.904407       0.349829   -9999.000000       0.039400       0.085600       0.639000
57293     57293     henan          114.9753       32.7369          109       180     2012      01        19        019              0.236133       2.589172       0.357367       0.356977   -9999.000000   -9999.000000       0.075200   -9999.000000
57293     57293     henan          114.9753       32.7369          109       180     2012      01        20        020              0.239500       2.706787       0.111210       0.354256   -9999.000000       0.056000   -9999.000000       0.558000
57293     57293     henan          114.9753       32.7369          109       180     2012      01        21        021              0.239417       2.839569       0.000000       0.336599   -9999.000000       0.041100   -9999.000000   -9999.000000
57293     57293     henan          114.9753       32.7369          109       180     2012      01        22        022              0.239000       0.391296       0.299442       0.279231   -9999.000000   -9999.000000       0.010000       0.165000
57293     57293     henan          114.9753       32.7369          109       180     2012      01        23        023              0.238000      -0.949554       0.000000       0.228945       0.123000       0.166000       0.108300   -9999.000000
57293     57293     henan          114.9753       32.7369          109       180     2012      01        24        024              0.237583       0.044189       0.000000       0.243102       0.125000       0.031700   -9999.000000   -9999.000000
57293     57293     henan          114.9753       32.7369          109       180     2012      01        25        025              0.236917      -0.223053       0.000000       0.244296       0.123000       0.075700       0.109900       0.109000
57293     57293     henan          114.9753       32.7369          109       180     2012      01        26        026              0.236000       0.797516       0.000000       0.260822   -9999.000000       0.005500   -9999.000000   -9999.000000
57293     57293     henan          114.9753       32.7369          109       180     2012      01        27        027              0.236000       1.812408       0.000000       0.286271   -9999.000000   -9999.000000       0.116500       0.449000
57293     57293     henan          114.9753       32.7369          109       180     2012      01        28        028              0.236000       2.685120       0.000000       0.317860       0.125000       0.125600       0.123000   -9999.000000
57293     57293     henan          114.9753       32.7369          109       180     2012      01        29        029              0.236000       2.759460       0.050225       0.334427       0.127000       0.045700       0.133300   -9999.000000
57293     57293     henan          114.9753       32.7369          109       180     2012      01        30        030              0.236000       3.003143       0.064846       0.330206       0.121000   -9999.000000       0.154200       0.358000
57293     57293     henan          114.9753       32.7369          109       180     2012      01        31        031              0.235542       3.203491       0.000000       0.324153   -9999.000000       0.172400   -9999.000000   -9999.000000
57293     57293     henan          114.9753       32.7369          109       180     2012      02        01        032              0.234333       4.719177       0.000000       0.333145   -9999.000000   -9999.000000   -9999.000000       0.317000
57293     57293     henan          114.9753       32.7369          109       180     2012      02        02        033              0.232500       1.439484       0.000000       0.303473       0.109000       0.143900       0.095400   -9999.000000
57293     57293     henan          114.9753       32.7369          109       180     2012      02        03        034              0.231750       1.369141       0.000000       0.282872       0.109000       0.133400       0.128000       0.232000
57293     57293     henan          114.9753       32.7369          109       180     2012      02        04        035              0.231000       2.504425       0.000000       0.301687       0.122000       0.179000       0.145800       0.345000
57293     57293     henan          114.9753       32.7369          109       180     2012      02        05        036              0.231000       1.467346       0.172543       0.307575   -9999.000000       0.029700       0.145200   -9999.000000
57293     57293     henan          114.9753       32.7369          109       180     2012      02        06        037              0.231292       4.754456       0.069776       0.329606   -9999.000000   -9999.000000   -9999.000000       0.236000
57293     57293     henan          114.9753       32.7369          109       180     2012      02        07        038              0.229000       5.499939       0.000000       0.319938   -9999.000000       0.277000   -9999.000000   -9999.000000
57293     57293     henan          114.9753       32.7369          109       180     2012      02        08        039              0.227667       1.800629       0.000000       0.279241   -9999.000000       0.016700       0.056000       0.009000
57293     57293     henan          114.9753       32.7369          109       180     2012      02        09        040              0.227000       1.119659       0.000000       0.264659       0.110000   -9999.000000       0.120400       0.275000
57293     57293     henan          114.9753       32.7369          109       180     2012      02        10        041              0.226917       1.169434       0.000000       0.279504   -9999.000000       0.162700       0.135000       0.399000
57293     57293     henan          114.9753       32.7369          109       180     2012      02        11        042              0.226250       2.869049       0.000000       0.284898   -9999.000000   -9999.000000       0.121700       0.097000
57293     57293     henan          114.9753       32.7369          109       180     2012      02        12        043              0.226000       3.677155       0.000000       0.308227   -9999.000000   -9999.000000   -9999.000000   -9999.000000
57293     57293     henan          114.9753       32.7369          109       180     2012      02        13        044              0.226000       2.323669       0.000000       0.314628   -9999.000000   -9999.000000   -9999.000000       0.198000
57293     57293     henan          114.9753       32.7369          109       180     2012      02        14        045              0.226333       2.596588       1.132536       0.317978       0.126000   -9999.000000       0.142000   -9999.000000
57293     57293     henan          114.9753       32.7369          109       180     2012      02        15        046              0.227708       3.610168       0.648467       0.329435       0.163000       0.047100       0.162000       0.612000
57293     57293     henan          114.9753       32.7369          109       180     2012      02        16        047              0.230792       3.451508       0.000000       0.333160   -9999.000000       0.020400       0.128000       0.210000
57293     57293     henan          114.9753       32.7369          109       180     2012      02        17        048              0.231333       4.579437       0.000000       0.329685   -9999.000000   -9999.000000   -9999.000000   -9999.000000
57293     57293     henan          114.9753       32.7369          109       180     2012      02        18        049              0.230583       3.993835       0.000000       0.315986       0.097000       0.224800   -9999.000000       0.050000
57293     57293     henan          114.9753       32.7369          109       180     2012      02        19        050              0.229167       4.085419       0.000000       0.311114       0.106000   -9999.000000       0.094900   -9999.000000
57293     57293     henan          114.9753       32.7369          109       180     2012      02        20        051              0.228000       5.470703       0.000000       0.322326       0.128000       0.083200       0.136200       0.346000
57293     57293     henan          114.9753       32.7369          109       180     2012      02        21        052              0.228000       5.197357       0.000000       0.326185   -9999.000000       0.161700   -9999.000000   -9999.000000
57293     57293     henan          114.9753       32.7369          109       180     2012      02        22        053              0.227667       9.260834       0.000000       0.324617       0.117000       0.074400       0.108400   -9999.000000
57293     57293     henan          114.9753       32.7369          109       180     2012      02        23        054              0.227000       7.952606       0.000000       0.324622       0.120000       0.011000   -9999.000000       0.248000
57293     57293     henan          114.9753       32.7369          109       180     2012      02        24        055              0.227000       5.303009       0.000000       0.324357       0.113000   -9999.000000   -9999.000000   -9999.000000
57293     57293     henan          114.9753       32.7369          109       180     2012      02        25        056              0.226083       4.535278       0.468895       0.323801       0.119000   -9999.000000       0.063800       0.221000
57293     57293     henan          114.9753       32.7369          109       180     2012      02        26        057              0.224000       4.419525       0.000000       0.320168   -9999.000000       0.074300       0.113400   -9999.000000
57293     57293     henan          114.9753       32.7369          109       180     2012      02        27        058              0.222000       5.076660       0.000000       0.310892       0.117000   -9999.000000   -9999.000000   -9999.000000
57293     57293     henan          114.9753       32.7369          109       180     2012      02        28        059              0.221500       4.346771       0.000000       0.315626       0.088000       0.168800       0.074100       0.217000
57293     57293     henan          114.9753       32.7369          109       180     2012      02        29        060              0.000000   -9999.000000       0.156912   -9999.000000       0.126000   -9999.000000   -9999.000000   -9999.000000
57293     57293     henan          114.9753       32.7369          109       180     2012      03        01        061              0.221000       6.147766       0.126469       0.316886       0.160000       0.069600       0.084900       0.408000
57293     57293     henan          114.9753       32.7369          109       180     2012      03        02        062              0.221000       5.006989       0.000000       0.320044       0.167000       0.032500       0.094600   -9999.000000
57293     57293     henan          114.9753       32.7369          109       180     2012      03        03        063              0.220458       5.493225       0.000000       0.320829       0.169000   -9999.000000       0.092500       0.226000
57293     57293     henan          114.9753       32.7369          109       180     2012      03        04        064              0.220000       4.264709       0.083704       0.321233       0.192000       0.005200       0.091700       0.354000
57293     57293     henan          114.9753       32.7369          109       180     2012      03        05        065              0.219417       3.409393       0.000000       0.321417       0.144000       0.107700   -9999.000000   -9999.000000
57293     57293     henan          114.9753       32.7369          109       180     2012      03        06        066              0.218000       5.668884       0.168548       0.321332       0.146000   -9999.000000   -9999.000000       0.080000
57293     57293     henan          114.9753       32.7369          109       180     2012      03        07        067              0.000000       8.093903       0.073656       0.317904       0.144000       0.206500       0.064100   -9999.000000
57293     57293     henan          114.9753       32.7369          109       180     2012      03        08        068              0.217000       8.226898       1.795962       0.315971   -9999.000000   -9999.000000       0.098700       0.075000
57293     57293     henan          114.9753       32.7369          109       180     2012      03        09        069              0.215583       6.899475       0.000000       0.315305   -9999.000000       0.024200       0.109400       0.149000
57293     57293     henan          114.9753       32.7369          109       180     2012      03        10        070              0.213174       7.093475       0.000000       0.313630       0.132000       0.138700       0.094600       0.201000
57293     57293     henan          114.9753       32.7369          109       180     2012      03        11        071              0.211542       9.460358       0.000000       0.310859       0.133000   -9999.000000   -9999.000000       0.020000
57293     57293     henan          114.9753       32.7369          109       180     2012      03        12        072              0.209792       6.113464       0.596739       0.308327       0.140000   -9999.000000   -9999.000000   -9999.000000
57293     57293     henan          114.9753       32.7369          109       180     2012      03        13        073              0.207542       7.706787       0.125402       0.308340   -9999.000000   -9999.000000       0.076400       0.002000
57293     57293     henan          114.9753       32.7369          109       180     2012      03        14        074              0.206458      11.433685       0.268498       0.306002       0.149000       0.174900       0.129600   -9999.000000
57293     57293     henan          114.9753       32.7369          109       180     2012      03        15        075              0.205875      13.277008       2.749710       0.303048       0.198000       0.016500       0.134900       0.381000
57293     57293     henan          114.9753       32.7369          109       180     2012      03        16        076              0.206458       9.031891       0.000000       0.318086       0.166000   -9999.000000       0.112400       0.087000
57293     57293     henan          114.9753       32.7369          109       180     2012      03        17        077              0.206333      10.454712       0.000000       0.314616       0.151000       0.224700   -9999.000000   -9999.000000
57293     57293     henan          114.9753       32.7369          109       180     2012      03        18        078              0.205875      11.818298       0.000000       0.310931   -9999.000000   -9999.000000       0.110600       0.025000
57293     57293     henan          114.9753       32.7369          109       180     2012      03        19        079              0.205000      10.151154       0.772912       0.309902       0.182000       0.099400       0.129400   -9999.000000
57293     57293     henan          114.9753       32.7369          109       180     2012      03        20        080              0.204833       5.072540       0.000000       0.311543       0.155000       0.055900       0.151600       0.047000
57293     57293     henan          114.9753       32.7369          109       180     2012      03        21        081              0.230958       6.580139      39.633270       0.310434       0.253500   -9999.000000       0.089100   -9999.000000
57293     57293     henan          114.9753       32.7369          109       180     2012      03        22        082              0.274417       7.620239       8.497950       0.371350       0.275000       0.184200   -9999.000000   -9999.000000
57293     57293     henan          114.9753       32.7369          109       180     2012      03        23        083              0.269292       6.034943       0.000000       0.394169       0.250000       0.155900   -9999.000000       0.159000
57293     57293     henan          114.9753       32.7369          109       180     2012      03        24        084              0.264958       9.323822       0.000000       0.370824       0.222000       0.083500   -9999.000000   -9999.000000
57293     57293     henan          114.9753       32.7369          109       180     2012      03        25        085              0.000000      12.388855       0.000000       0.359822       0.226000       0.238300       0.140900       0.083000
57293     57293     henan          114.9753       32.7369          109       180     2012      03        26        086              0.256125      14.254211       0.234756       0.352566       0.197500   -9999.000000       0.166400   -9999.000000
57293     57293     henan          114.9753       32.7369          109       180     2012      03        27        087              0.250833      16.068024       3.642206       0.346291       0.192000       0.123400       0.158500   -9999.000000
57293     57293     henan          114.9753       32.7369          109       180     2012      03        28        088              0.245417      17.595581       0.269518       0.339992       0.177000       0.121700   -9999.000000       0.026000
57293     57293     henan          114.9753       32.7369          109       180     2012      03        29        089              0.242208      18.255646       1.451802       0.333829   -9999.000000   -9999.000000   -9999.000000   -9999.000000
57293     57293     henan          114.9753       32.7369          109       180     2012      03        30        090              0.242000      16.277100       4.379975       0.333802       0.222000       0.071300       0.134300       0.097000
57293     57293     henan          114.9753       32.7369          109       180     2012      03        31        091              0.239500      13.063721       0.000000       0.347561       0.183500   -9999.000000       0.176600   -9999.000000
57293     57293     henan          114.9753       32.7369          109       180     2012      04        01        092              0.234417      15.462860       0.000000       0.335847       0.215000       0.146400       0.154000       0.074000
57293     57293     henan          114.9753       32.7369          109       180     2012      04        02        093              0.231208      16.921875       0.000000       0.327872   -9999.000000       0.213200       0.151500       0.007000
57293     57293     henan          114.9753       32.7369          109       180     2012      04        03        094              0.227417      11.990143       0.000000       0.326477   -9999.000000       0.275800   -9999.000000   -9999.000000
57293     57293     henan          114.9753       32.7369          109       180     2012      04        04        095              0.224125      14.274994       0.000000       0.321240       0.219000       0.082000       0.158800   -9999.000000
57293     57293     henan          114.9753       32.7369          109       180     2012      04        05        096              0.220542      15.549408       0.000000       0.318268       0.202500   -9999.000000       0.161000   -9999.000000
57293     57293     henan          114.9753       32.7369          109       180     2012      04        06        097              0.217042      16.829102       0.000000       0.313200       0.201500       0.048300       0.152000   -9999.000000
57293     57293     henan          114.9753       32.7369          109       180     2012      04        07        098              0.213000      17.785095       0.000000       0.307686       0.176000   -9999.000000       0.146700   -9999.000000
57293     57293     henan          114.9753       32.7369          109       180     2012      04        08        099              0.208750      18.993286       1.802902       0.302463   -9999.000000   -9999.000000   -9999.000000   -9999.000000
57293     57293     henan          114.9753       32.7369          109       180     2012      04        09        100              0.207000      20.085480       0.317476       0.296836       0.218000       0.099900   -9999.000000   -9999.000000
57293     57293     henan          114.9753       32.7369          109       180     2012      04        10        101              0.206500      18.028473       0.000000       0.298668       0.182000       0.083900       0.095600   -9999.000000
57293     57293     henan          114.9753       32.7369          109       180     2012      04        11        102              0.203375      18.658539       0.479847       0.297067       0.236000       0.056100       0.154600   -9999.000000
57293     57293     henan          114.9753       32.7369          109       180     2012      04        12        103              0.201958      19.105743       1.791229       0.292526       0.262500   -9999.000000       0.132600   -9999.000000
57293     57293     henan          114.9753       32.7369          109       180     2012      04        13        104              0.200000      13.525696       0.000000       0.301742       0.227000   -9999.000000       0.138700   -9999.000000
57293     57293     henan          114.9753       32.7369          109       180     2012      04        14        105              0.197667      17.200775       1.682972       0.296487   -9999.000000   -9999.000000   -9999.000000   -9999.000000
57293     57293     henan          114.9753       32.7369          109       180     2012      04        15        106              0.196542      16.081512       0.000000       0.294533       0.271000       0.060800       0.152600   -9999.000000
57293     57293     henan          114.9753       32.7369          109       180     2012      04        16        107              0.194083      17.848480       0.000000       0.289486       0.197000   -9999.000000       0.158900   -9999.000000
57293     57293     henan          114.9753       32.7369          109       180     2012      04        17        108              0.192125      19.379974       0.000000       0.284283       0.225000       0.076200       0.168200   -9999.000000
57293     57293     henan          114.9753       32.7369          109       180     2012      04        18        109              0.191708      20.446686       0.000000       0.277347   -9999.000000   -9999.000000   -9999.000000       0.001000
57293     57293     henan          114.9753       32.7369          109       180     2012      04        19        110              0.190875      17.915649       0.000000       0.278332   -9999.000000       0.083200       0.179000   -9999.000000
57293     57293     henan          114.9753       32.7369          109       180     2012      04        20        111              0.189167      21.194977       1.999347       0.271636       0.250000       0.058800   -9999.000000   -9999.000000
57293     57293     henan          114.9753       32.7369          109       180     2012      04        21        112              0.187542      16.519653       0.000000       0.273345       0.219500   -9999.000000       0.159400       0.023000
57293     57293     henan          114.9753       32.7369          109       180     2012      04        22        113              0.186583      20.037476       0.075056       0.268279       0.203000       0.027200       0.198400   -9999.000000
57293     57293     henan          114.9753       32.7369          109       180     2012      04        23        114              0.184750      22.757080       8.441114       0.256535       0.180000   -9999.000000       0.175900       0.112000
57293     57293     henan          114.9753       32.7369          109       180     2012      04        24        115              0.187625      25.401917       0.575781       0.277228   -9999.000000       0.386400       0.180000   -9999.000000
57293     57293     henan          114.9753       32.7369          109       180     2012      04        25        116              0.000000      20.107178       0.061458       0.306448       0.257000       0.186400   -9999.000000   -9999.000000
57293     57293     henan          114.9753       32.7369          109       180     2012      04        26        117              0.185875      18.299866       0.000000       0.289634       0.215000   -9999.000000   -9999.000000       0.010000
57293     57293     henan          114.9753       32.7369          109       180     2012      04        27        118              0.184458      20.935211       0.104464       0.275358       0.207500       0.177600   -9999.000000   -9999.000000
57293     57293     henan          114.9753       32.7369          109       180     2012      04        28        119              0.182304      23.710815      25.435547       0.264246       0.182000       0.280000       0.196300       0.101000
57293     57293     henan          114.9753       32.7369          109       180     2012      04        29        120              0.181500      24.012115       0.000000       0.341189       0.212000       0.128900       0.158200   -9999.000000
57293     57293     henan          114.9753       32.7369          109       180     2012      04        30        121              0.181208      22.196533       1.593750       0.337734       0.261000       0.113000       0.159400   -9999.000000
57293     57293     henan          114.9753       32.7369          109       180     2012      05        01        122              0.182667      19.827209       0.000000       0.330746       0.251000   -9999.000000   -9999.000000       0.109000
57293     57293     henan          114.9753       32.7369          109       180     2012      05        02        123              0.183292      19.549652       0.000000       0.327441       0.218000   -9999.000000       0.154400   -9999.000000
57293     57293     henan          114.9753       32.7369          109       180     2012      05        03        124              0.182625      22.832245       2.832009       0.316305       0.213500       0.145200       0.134900       0.110000
57293     57293     henan          114.9753       32.7369          109       180     2012      05        04        125              0.181917      23.694000       0.000000       0.308962       0.185000   -9999.000000       0.149200   -9999.000000
57293     57293     henan          114.9753       32.7369          109       180     2012      05        05        126              0.180050      24.585419       0.000000       0.298123   -9999.000000   -9999.000000       0.139300       0.067000
57293     57293     henan          114.9753       32.7369          109       180     2012      05        06        127              0.178458      25.928284       0.640403       0.286575       0.234000   -9999.000000   -9999.000000       0.151000
57293     57293     henan          114.9753       32.7369          109       180     2012      05        07        128              0.180375      27.052704      10.086495       0.274911   -9999.000000       0.165600   -9999.000000       0.176000
57293     57293     henan          114.9753       32.7369          109       180     2012      05        08        129              0.185667      23.428650       0.000000       0.330735       0.246000       0.142800       0.120100       0.211000
57293     57293     henan          114.9753       32.7369          109       180     2012      05        09        130              0.187000      23.542236       0.521488       0.318039       0.230000       0.162000       0.129400   -9999.000000
57293     57293     henan          114.9753       32.7369          109       180     2012      05        10        131              0.186542      25.971283       1.392012       0.306578   -9999.000000       0.113200       0.120000       0.174000
57293     57293     henan          114.9753       32.7369          109       180     2012      05        11        132              0.185625      25.525787       4.173058       0.294799       0.169000   -9999.000000       0.117800   -9999.000000
57293     57293     henan          114.9753       32.7369          109       180     2012      05        12        133              0.185000      26.650909       1.852802       0.284635       0.178000       0.292600   -9999.000000       0.242000
57293     57293     henan          114.9753       32.7369          109       180     2012      05        13        134              0.184083      22.222443       1.296859       0.296856       0.173000       0.101800   -9999.000000       0.236000
57293     57293     henan          114.9753       32.7369          109       180     2012      05        14        135              0.183750      22.990143       0.516227       0.293866   -9999.000000   -9999.000000       0.077600   -9999.000000
57293     57293     henan          114.9753       32.7369          109       180     2012      05        15        136              0.183417      21.831573       0.000000       0.293061   -9999.000000       0.159600       0.157900       0.251000
57293     57293     henan          114.9753       32.7369          109       180     2012      05        16        137              0.182458      24.240662       1.405043       0.278370       0.192000   -9999.000000       0.130600   -9999.000000
57293     57293     henan          114.9753       32.7369          109       180     2012      05        17        138              0.181750      25.493256       0.000000       0.272037       0.144500       0.146400       0.121500       0.341000
57293     57293     henan          114.9753       32.7369          109       180     2012      05        18        139              0.180958      27.542999       0.252396       0.259467       0.167000       0.111700   -9999.000000   -9999.000000
57293     57293     henan          114.9753       32.7369          109       180     2012      05        19        140              0.179958      26.612427       1.701859       0.249572       0.146000   -9999.000000       0.131000   -9999.000000
57293     57293     henan          114.9753       32.7369          109       180     2012      05        20        141              0.178583      26.446320       0.000000       0.237361       0.168000       0.117300       0.139400       0.203000
57293     57293     henan          114.9753       32.7369          109       180     2012      05        21        142              0.177792      25.284515       0.000000       0.226532       0.106000       0.118400       0.119400   -9999.000000
57293     57293     henan          114.9753       32.7369          109       180     2012      05        22        143              0.176833      25.654938       0.122045       0.217597       0.115000   -9999.000000       0.089100       0.364000
57293     57293     henan          114.9753       32.7369          109       180     2012      05        23        144              0.176792      24.813232       0.000000       0.213328   -9999.000000       0.093800   -9999.000000   -9999.000000
57293     57293     henan          114.9753       32.7369          109       180     2012      05        24        145              0.176667      24.897614       3.034418       0.211890   -9999.000000   -9999.000000   -9999.000000   -9999.000000
57293     57293     henan          114.9753       32.7369          109       180     2012      05        25        146              0.000000      23.684479       0.227260       0.241159   -9999.000000       0.095200       0.088700       0.335000
57293     57293     henan          114.9753       32.7369          109       180     2012      05        26        147              0.176125      23.660980       0.000000       0.240217   -9999.000000       0.074900       0.130600   -9999.000000
57293     57293     henan          114.9753       32.7369          109       180     2012      05        27        148              0.175208      27.106415       0.046025       0.220708       0.124000       0.104600       0.115000       0.197000
57293     57293     henan          114.9753       32.7369          109       180     2012      05        28        149              0.176125      26.342987       2.730004       0.212645       0.095500       0.079200       0.108500   -9999.000000
57293     57293     henan          114.9753       32.7369          109       180     2012      05        29        150              0.175667      27.913574       6.241649       0.200916       0.152000   -9999.000000   -9999.000000       0.142000
57293     57293     henan          114.9753       32.7369          109       180     2012      05        30        151              0.177250      21.594696       1.125500       0.264082       0.142000       0.114400   -9999.000000   -9999.000000
57293     57293     henan          114.9753       32.7369          109       180     2012      05        31        152              0.177458      25.395721       0.185883       0.252696   -9999.000000       0.072100   -9999.000000   -9999.000000
57293     57293     henan          114.9753       32.7369          109       180     2012      06        01        153              0.177167      25.536713       0.000000       0.236018       0.092000   -9999.000000       0.130600       0.242000
57293     57293     henan          114.9753       32.7369          109       180     2012      06        02        154              0.178542      23.315186       0.000000       0.230939       0.090000       0.082200       0.136800   -9999.000000
57293     57293     henan          114.9753       32.7369          109       180     2012      06        03        155              0.177750      27.107574       0.559242       0.216905       0.097000       0.285300       0.135400       0.207000
57293     57293     henan          114.9753       32.7369          109       180     2012      06        04        156              0.178375      24.975616       1.360330       0.210282       0.104000       0.331600   -9999.000000       0.140000
57293     57293     henan          114.9753       32.7369          109       180     2012      06        05        157              0.181917      28.035248       5.290524       0.202615   -9999.000000       0.148100       0.090400       0.355000
57293     57293     henan          114.9753       32.7369          109       180     2012      06        06        158              0.182792      27.879120       4.662638       0.237023       0.115000   -9999.000000       0.103400       0.718000
57293     57293     henan          114.9753       32.7369          109       180     2012      06        07        159              0.185625      23.587585       0.000000       0.295493       0.094500       0.157700       0.082400   -9999.000000
57293     57293     henan          114.9753       32.7369          109       180     2012      06        08        160              0.187500      27.166840       1.332807       0.271207       0.102000       0.132100       0.083900       0.375000
57293     57293     henan          114.9753       32.7369          109       180     2012      06        09        161              0.191917      30.241455       0.000000       0.247313       0.110500       0.133300   -9999.000000   -9999.000000
57293     57293     henan          114.9753       32.7369          109       180     2012      06        10        162              0.195083      32.293518       0.036237       0.224868       0.110000       0.399000   -9999.000000       0.262000
57293     57293     henan          114.9753       32.7369          109       180     2012      06        11        163              0.000000      32.043854       0.000000       0.210615       0.077000   -9999.000000       0.046900       0.292000
57293     57293     henan          114.9753       32.7369          109       180     2012      06        12        164              0.202042      29.131592       1.593966       0.204322       0.094000       0.172400       0.073400   -9999.000000
57293     57293     henan          114.9753       32.7369          109       180     2012      06        13        165              0.246125      32.454163       1.339811       0.195431       0.086000       0.082700       0.073400       0.345000
57293     57293     henan          114.9753       32.7369          109       180     2012      06        14        166              0.237542      34.095764       0.000000       0.190523       0.097000       0.079800       0.072200   -9999.000000
57293     57293     henan          114.9753       32.7369          109       180     2012      06        15        167              0.238333      30.466034       2.028927       0.191574       0.099000       0.104100   -9999.000000       0.336000
57293     57293     henan          114.9753       32.7369          109       180     2012      06        16        168              0.242917      31.146637       0.000000       0.189718   -9999.000000   -9999.000000   -9999.000000   -9999.000000
57293     57293     henan          114.9753       32.7369          109       180     2012      06        17        169              0.239130      31.139313       3.739117       0.188518       0.095000   -9999.000000       0.059500   -9999.000000
57293     57293     henan          114.9753       32.7369          109       180     2012      06        18        170              0.237708      28.607300       1.589725       0.190842       0.096000       0.125700       0.073500       0.332000
57293     57293     henan          114.9753       32.7369          109       180     2012      06        19        171              0.236167      32.031189       0.000000       0.189015       0.095000   -9999.000000       0.062700   -9999.000000
57293     57293     henan          114.9753       32.7369          109       180     2012      06        20        172              0.235042      32.554596       0.000000       0.187563       0.096000       0.169000       0.057900       0.370000
57293     57293     henan          114.9753       32.7369          109       180     2012      06        21        173              0.234000      32.852203       0.940345       0.186086   -9999.000000   -9999.000000   -9999.000000   -9999.000000
57293     57293     henan          114.9753       32.7369          109       180     2012      06        22        174              0.233292      33.216614       0.624120       0.185442       0.104000   -9999.000000       0.074800   -9999.000000
57293     57293     henan          114.9753       32.7369          109       180     2012      06        23        175              0.232208      34.660583       0.000000       0.185896       0.095000       0.192000       0.067000       0.356000
57293     57293     henan          114.9753       32.7369          109       180     2012      06        24        176              0.230792      34.140228       0.000000       0.185139       0.097500   -9999.000000       0.060800   -9999.000000
57293     57293     henan          114.9753       32.7369          109       180     2012      06        25        177              0.229208      34.411804       2.606076       0.185080       0.086000       0.105700       0.050700       0.357000
57293     57293     henan          114.9753       32.7369          109       180     2012      06        26        178              0.227636      34.092255       0.116702       0.185121   -9999.000000   -9999.000000   -9999.000000   -9999.000000
57293     57293     henan          114.9753       32.7369          109       180     2012      06        27        179              0.226083      31.615509       1.962460       0.186165       0.138000   -9999.000000   -9999.000000       0.327000
57293     57293     henan          114.9753       32.7369          109       180     2012      06        28        180              0.228333      26.619598       7.739161       0.205156       0.171000       0.294400       0.071000       0.872000
57293     57293     henan          114.9753       32.7369          109       180     2012      06        29        181              0.240542      27.322632       2.145257       0.276126       0.149500   -9999.000000       0.092000   -9999.000000
57293     57293     henan          114.9753       32.7369          109       180     2012      06        30        182              0.269500      29.054596      43.942947       0.273516       0.158000       0.282500       0.081400   -9999.000000
57293     57293     henan          114.9753       32.7369          109       180     2012      07        01        183              0.267708      24.761963       4.333716       0.392176   -9999.000000       0.415800       0.088300   -9999.000000
57293     57293     henan          114.9753       32.7369          109       180     2012      07        02        184              0.273250      25.835358      31.465849       0.379539   -9999.000000       0.505100   -9999.000000       1.000000
57293     57293     henan          114.9753       32.7369          109       180     2012      07        03        185              0.268333      26.527863       1.649334       0.409050       0.258000       0.294400   -9999.000000   -9999.000000
57293     57293     henan          114.9753       32.7369          109       180     2012      07        04        186              0.263583      30.192566       0.463336       0.380844       0.205000   -9999.000000       0.089000       0.787000
57293     57293     henan          114.9753       32.7369          109       180     2012      07        05        187              0.263542      29.663940       2.782388       0.364079       0.211000       0.303000       0.111500       0.889000
57293     57293     henan          114.9753       32.7369          109       180     2012      07        06        188              0.263167      27.122101       3.515090       0.363301   -9999.000000       0.291500       0.098400   -9999.000000
57293     57293     henan          114.9753       32.7369          109       180     2012      07        07        189              0.260583      29.419952       1.989688       0.357231   -9999.000000   -9999.000000       0.097400       0.743000
57293     57293     henan          114.9753       32.7369          109       180     2012      07        08        190              0.257042      30.543274       0.118230       0.352331       0.173000       0.387300   -9999.000000   -9999.000000
57293     57293     henan          114.9753       32.7369          109       180     2012      07        09        191              0.252667      31.764557       0.863907       0.338624       0.152500   -9999.000000       0.063500       0.740000
57293     57293     henan          114.9753       32.7369          109       180     2012      07        10        192              0.248208      31.714508       0.274495       0.326962       0.164000   -9999.000000       0.100400       0.626000
57293     57293     henan          114.9753       32.7369          109       180     2012      07        11        193              0.243958      30.078125       0.000000       0.323637       0.174000       0.180600       0.080200   -9999.000000
57293     57293     henan          114.9753       32.7369          109       180     2012      07        12        194              0.239833      33.196960       0.000000       0.309818   -9999.000000   -9999.000000       0.072600       0.578000
57293     57293     henan          114.9753       32.7369          109       180     2012      07        13        195              0.259917      29.556274       8.309449       0.305517   -9999.000000       0.358700   -9999.000000   -9999.000000
57293     57293     henan          114.9753       32.7369          109       180     2012      07        14        196              0.280000      28.161194       7.013482       0.329206       0.243000       0.241700   -9999.000000       0.958000
57293     57293     henan          114.9753       32.7369          109       180     2012      07        15        197              0.274083      26.446716       0.000000       0.352234       0.198000   -9999.000000       0.052200   -9999.000000
57293     57293     henan          114.9753       32.7369          109       180     2012      07        16        198              0.278625      28.311462       4.546640       0.334386       0.165500       0.344000       0.107100   -9999.000000
57293     57293     henan          114.9753       32.7369          109       180     2012      07        17        199              0.276917      28.598145       2.151792       0.331422       0.156000   -9999.000000       0.074400       0.776000
57293     57293     henan          114.9753       32.7369          109       180     2012      07        18        200              0.271625      29.091217       0.000000       0.320432   -9999.000000       0.175100       0.065400   -9999.000000
57293     57293     henan          114.9753       32.7369          109       180     2012      07        19        201              0.266458      29.794128       0.000000       0.308564       0.179000       0.126100   -9999.000000       0.736000
57293     57293     henan          114.9753       32.7369          109       180     2012      07        20        202              0.262250      30.382751       1.433382       0.296976       0.153000       0.258300       0.071300   -9999.000000
57293     57293     henan          114.9753       32.7369          109       180     2012      07        21        203              0.259875      31.485046       1.790234       0.295354       0.218500       0.213800       0.077900   -9999.000000
57293     57293     henan          114.9753       32.7369          109       180     2012      07        22        204              0.256625      33.285034       0.000000       0.281689       0.229000   -9999.000000       0.080600       0.760000
57293     57293     henan          114.9753       32.7369          109       180     2012      07        23        205              0.253250      32.488617       1.063887       0.268236   -9999.000000       0.187800       0.099800   -9999.000000
57293     57293     henan          114.9753       32.7369          109       180     2012      07        24        206              0.250375      32.618286       2.565962       0.255878       0.269000       0.176700   -9999.000000       0.700000
57293     57293     henan          114.9753       32.7369          109       180     2012      07        25        207              0.246375      33.205536       0.000000       0.244571       0.203500   -9999.000000   -9999.000000   -9999.000000
57293     57293     henan          114.9753       32.7369          109       180     2012      07        26        208              0.241792      34.444885       0.000000       0.231134       0.218500       0.181800       0.088500       0.544000
57293     57293     henan          114.9753       32.7369          109       180     2012      07        27        209              0.236958      34.873199       2.651549       0.219500       0.194000   -9999.000000       0.119000       0.723000
57293     57293     henan          114.9753       32.7369          109       180     2012      07        28        210              0.232500      34.839478       1.238145       0.210868       0.195000       0.149300       0.100600   -9999.000000
57293     57293     henan          114.9753       32.7369          109       180     2012      07        29        211              0.228083      34.532410       0.178432       0.219199   -9999.000000       0.067700       0.088900       0.623000
57293     57293     henan          114.9753       32.7369          109       180     2012      07        30        212              0.224208      35.472107       0.000000       0.209370       0.228000   -9999.000000   -9999.000000   -9999.000000
57293     57293     henan          114.9753       32.7369          109       180     2012      07        31        213              0.220458      36.188263       0.000000       0.201249       0.198500       0.254300   -9999.000000       0.646000
57293     57293     henan          114.9753       32.7369          109       180     2012      08        01        214              0.217875      36.844635       2.277549       0.196182       0.263000       0.073700       0.071000       0.710000
57293     57293     henan          114.9753       32.7369          109       180     2012      08        02        215              0.275958      33.843262       0.000000       0.196126       0.243000       0.287000       0.113400       0.673000
57293     57293     henan          114.9753       32.7369          109       180     2012      08        03        216              0.268917      33.242126       5.121716       0.194501   -9999.000000       0.157500       0.105600       0.607000
57293     57293     henan          114.9753       32.7369          109       180     2012      08        04        217              0.276000      30.672546       3.268771       0.208303       0.321000   -9999.000000       0.112400   -9999.000000
57293     57293     henan          114.9753       32.7369          109       180     2012      08        05        218              0.272167      29.359924       0.000000       0.284800       0.290500       0.112300   -9999.000000       0.738000
57293     57293     henan          114.9753       32.7369          109       180     2012      08        06        219              0.268250      30.058228       0.000000       0.257223       0.276000       0.225000       0.090800   -9999.000000
57293     57293     henan          114.9753       32.7369          109       180     2012      08        07        220              0.264667      31.424438       0.000000       0.235400       0.234000   -9999.000000   -9999.000000       0.744000
57293     57293     henan          114.9753       32.7369          109       180     2012      08        08        221              0.260750      31.679962       0.452524       0.220380       0.252000       0.103100       0.103200       0.611000
57293     57293     henan          114.9753       32.7369          109       180     2012      08        09        222              0.258417      32.777924       4.061687       0.207937       0.383000   -9999.000000       0.081600   -9999.000000
57293     57293     henan          114.9753       32.7369          109       180     2012      08        10        223              0.272739      31.510101       6.781446       0.216504       0.366000       0.289700   -9999.000000       0.820000
57293     57293     henan          114.9753       32.7369          109       180     2012      08        11        224              0.271208      29.065552       0.038474       0.289462       0.332000       0.165600   -9999.000000   -9999.000000
57293     57293     henan          114.9753       32.7369          109       180     2012      08        12        225              0.271875      30.468842       1.665982       0.268138       0.301500       0.103000       0.064900       0.747000
57293     57293     henan          114.9753       32.7369          109       180     2012      08        13        226              0.275250      31.134308       7.174869       0.255890       0.336000       0.144700       0.089400   -9999.000000
57293     57293     henan          114.9753       32.7369          109       180     2012      08        14        227              0.275917      26.948730       0.555599       0.265318   -9999.000000   -9999.000000       0.084100   -9999.000000
57293     57293     henan          114.9753       32.7369          109       180     2012      08        15        228              0.272833      26.978363       0.521335       0.296414       0.331000       0.367900       0.071600       0.767000
57293     57293     henan          114.9753       32.7369          109       180     2012      08        16        229              0.270292      27.459839       1.896225       0.281023       0.300000       0.104900   -9999.000000   -9999.000000
57293     57293     henan          114.9753       32.7369          109       180     2012      08        17        230              0.267208      28.518402       0.000000       0.264154       0.306000   -9999.000000   -9999.000000       0.712000
57293     57293     henan          114.9753       32.7369          109       180     2012      08        18        231              0.265042      30.427734       1.875014       0.253929       0.260000       0.092100       0.064800   -9999.000000
57293     57293     henan          114.9753       32.7369          109       180     2012      08        19        232              0.261208      32.229187       0.403499       0.251700   -9999.000000       0.111200       0.077300   -9999.000000
57293     57293     henan          114.9753       32.7369          109       180     2012      08        20        233              0.276667      31.254150      29.024199       0.238634       0.364000   -9999.000000       0.112600       0.890000
57293     57293     henan          114.9753       32.7369          109       180     2012      08        21        234              0.283917      29.068939       6.819823       0.333709       0.313000       0.245100       0.109800   -9999.000000
57293     57293     henan          114.9753       32.7369          109       180     2012      08        22        235              0.279583      24.590851       9.018788       0.362813       0.292500   -9999.000000   -9999.000000   -9999.000000
57293     57293     henan          114.9753       32.7369          109       180     2012      08        23        236              0.276625      21.888580       0.000000       0.340733       0.268000       0.179700       0.130000   -9999.000000
57293     57293     henan          114.9753       32.7369          109       180     2012      08        24        237              0.273333      24.634033       0.000000       0.325956       0.234000       0.165200       0.123900       0.742000
57293     57293     henan          114.9753       32.7369          109       180     2012      08        25        238              0.000000      25.572083       1.830599       0.313679   -9999.000000   -9999.000000       0.127000       0.723000
57293     57293     henan          114.9753       32.7369          109       180     2012      08        26        239              0.290208      27.802673      77.771500       0.306887   -9999.000000       0.185500       0.087600   -9999.000000
57293     57293     henan          114.9753       32.7369          109       180     2012      08        27        240              0.304333      24.696686      33.707886       0.422972       0.304000   -9999.000000   -9999.000000       0.911000
57293     57293     henan          114.9753       32.7369          109       180     2012      08        28        241              0.295292      24.600159       0.378588       0.422395       0.304000       0.153000   -9999.000000   -9999.000000
57293     57293     henan          114.9753       32.7369          109       180     2012      08        29        242              0.291042      26.785309       0.000000       0.384735       0.261000       0.116800       0.084200       0.877000
57293     57293     henan          114.9753       32.7369          109       180     2012      08        30        243              0.287417      28.769928       0.000000       0.371279   -9999.000000       0.224200       0.125900       0.829000
57293     57293     henan          114.9753       32.7369          109       180     2012      08        31        244              0.286043      28.808533       0.044378       0.362082       0.296000       0.149300       0.107100       0.781000
57293     57293     henan          114.9753       32.7369          109       180     2012      09        01        245              0.282875      29.129089       1.905343       0.355643       0.218500   -9999.000000       0.102800       0.735000
57293     57293     henan          114.9753       32.7369          109       180     2012      09        02        246              0.281583      29.721588       0.090850       0.349391       0.229500       0.198100   -9999.000000   -9999.000000
57293     57293     henan          114.9753       32.7369          109       180     2012      09        03        247              0.278545      24.444153       0.000000       0.349254       0.176000       0.111500   -9999.000000       0.741000
57293     57293     henan          114.9753       32.7369          109       180     2012      09        04        248              0.275833      25.484863       0.000000       0.339391       0.175000   -9999.000000       0.115200   -9999.000000
57293     57293     henan          114.9753       32.7369          109       180     2012      09        05        249              0.272542      25.078400       0.602023       0.330872       0.228000       0.260400       0.116900       0.663000
57293     57293     henan          114.9753       32.7369          109       180     2012      09        06        250              0.269458      25.369598       0.198185       0.323112   -9999.000000       0.166900       0.098200       0.714000
57293     57293     henan          114.9753       32.7369          109       180     2012      09        07        251              0.269750      26.643463      27.176399       0.319100       0.200000   -9999.000000       0.102900   -9999.000000
57293     57293     henan          114.9753       32.7369          109       180     2012      09        08        252              0.296958      27.472137      28.400589       0.337706       0.296000       0.382300   -9999.000000       0.993000
57293     57293     henan          114.9753       32.7369          109       180     2012      09        09        253              0.291458      22.501923       0.000000       0.412418       0.226000   -9999.000000       0.137000   -9999.000000
57293     57293     henan          114.9753       32.7369          109       180     2012      09        10        254              0.288500      23.797516       0.088187       0.378645   -9999.000000       0.202800       0.148400       0.793000
57293     57293     henan          114.9753       32.7369          109       180     2012      09        11        255              0.298958      24.468262      40.262821       0.367482       0.180000       0.248300       0.151300   -9999.000000
57293     57293     henan          114.9753       32.7369          109       180     2012      09        12        256              0.297792      23.279785       1.111445       0.413610       0.176500   -9999.000000       0.131200   -9999.000000
57293     57293     henan          114.9753       32.7369          109       180     2012      09        13        257              0.293833      21.400482       0.079085       0.388001       0.164000       0.168900   -9999.000000       0.879000
57293     57293     henan          114.9753       32.7369          109       180     2012      09        14        258              0.291625      20.029205       0.000000       0.374840       0.133000   -9999.000000   -9999.000000   -9999.000000
57293     57293     henan          114.9753       32.7369          109       180     2012      09        15        259              0.289333      21.427948       0.000000       0.364358   -9999.000000       0.282800       0.088800       0.825000
57293     57293     henan          114.9753       32.7369          109       180     2012      09        16        260              0.287333      21.866669       0.000000       0.356709       0.180000   -9999.000000       0.147300   -9999.000000
57293     57293     henan          114.9753       32.7369          109       180     2012      09        17        261              0.286250      21.847809       0.000000       0.350785       0.147500   -9999.000000       0.141600   -9999.000000
57293     57293     henan          114.9753       32.7369          109       180     2012      09        18        262              0.283500      21.303436       0.000000       0.346313       0.162000       0.231700       0.130000       0.774000
57293     57293     henan          114.9753       32.7369          109       180     2012      09        19        263              0.281458      22.789154       0.601340       0.341255       0.157000   -9999.000000   -9999.000000   -9999.000000
57293     57293     henan          114.9753       32.7369          109       180     2012      09        20        264              0.279375      23.971405       0.091970       0.337974       0.157000   -9999.000000       0.126800       0.732000
57293     57293     henan          114.9753       32.7369          109       180     2012      09        21        265              0.277250      24.669586       0.106797       0.334249   -9999.000000       0.285400       0.128900   -9999.000000
57293     57293     henan          114.9753       32.7369          109       180     2012      09        22        266              0.275458      23.579987       0.071028       0.330178       0.177000   -9999.000000       0.166300       0.685000
57293     57293     henan          114.9753       32.7369          109       180     2012      09        23        267              0.272625      24.439392       0.000000       0.326316       0.167000       0.225200       0.145200       0.746000
57293     57293     henan          114.9753       32.7369          109       180     2012      09        24        268              0.269750      24.300323       2.051457       0.322688       0.175500       0.198300   -9999.000000   -9999.000000
57293     57293     henan          114.9753       32.7369          109       180     2012      09        25        269              0.266208      24.605957       0.000000       0.318763       0.177000   -9999.000000   -9999.000000       0.617000
57293     57293     henan          114.9753       32.7369          109       180     2012      09        26        270              0.262875      24.522980       0.000000       0.315578   -9999.000000       0.238300       0.086400   -9999.000000
57293     57293     henan          114.9753       32.7369          109       180     2012      09        27        271              0.261071      23.274231       1.466926       0.314528       0.177000   -9999.000000       0.127400       0.602000
57293     57293     henan          114.9753       32.7369          109       180     2012      09        28        272              0.253400      23.912628       0.000000       0.308905       0.181000   -9999.000000       0.112000       0.628000
57293     57293     henan          114.9753       32.7369          109       180     2012      09        29        273              0.251750      19.090210       0.000000       0.300550       0.180000   -9999.000000       0.109000       0.680000
57293     57293     henan          114.9753       32.7369          109       180     2012      09        30        274              0.249375      19.388397       0.000000       0.297768       0.177000   -9999.000000   -9999.000000       0.442000
57293     57293     henan          114.9753       32.7369          109       180     2012      10        01        275              0.247125      19.585968       2.105296       0.294677       0.140000       0.124200   -9999.000000   -9999.000000
57293     57293     henan          114.9753       32.7369          109       180     2012      10        02        276              0.246417      20.166382       0.088046       0.290289       0.131000   -9999.000000       0.045800       0.501000
57293     57293     henan          114.9753       32.7369          109       180     2012      10        03        277              0.244292      21.063019       0.000000       0.286531       0.144000       0.205600       0.083500   -9999.000000
57293     57293     henan          114.9753       32.7369          109       180     2012      10        04        278              0.242417      20.619598       0.000000       0.283188       0.138500   -9999.000000       0.087100       0.513000
57293     57293     henan          114.9753       32.7369          109       180     2012      10        05        279              0.242000      21.005432      10.257377       0.283684       0.145000       0.112500       0.076800       0.410000
57293     57293     henan          114.9753       32.7369          109       180     2012      10        06        280              0.242000      20.707306       0.000000       0.285090       0.147000       0.150900   -9999.000000   -9999.000000
57293     57293     henan          114.9753       32.7369          109       180     2012      10        07        281              0.241583      21.193176       0.000000       0.282322   -9999.000000   -9999.000000       0.080900       0.481000
57293     57293     henan          114.9753       32.7369          109       180     2012      10        08        282              0.239583      21.803101       0.000000       0.279546       0.148000   -9999.000000       0.069200   -9999.000000
57293     57293     henan          114.9753       32.7369          109       180     2012      10        09        283              0.237250      21.973602       0.000000       0.275689       0.136500       0.037200       0.069200       0.518000
57293     57293     henan          114.9753       32.7369          109       180     2012      10        10        284              0.236042      21.097107       0.000000       0.271890       0.136000   -9999.000000       0.059100   -9999.000000
57293     57293     henan          114.9753       32.7369          109       180     2012      10        11        285              0.234083      20.047577       2.232265       0.266192       0.096000       0.114700   -9999.000000   -9999.000000
57293     57293     henan          114.9753       32.7369          109       180     2012      10        12        286              0.233000      20.137604       0.227573       0.264205   -9999.000000   -9999.000000   -9999.000000       0.495000
57293     57293     henan          114.9753       32.7369          109       180     2012      10        13        287              0.232458      19.696503       0.442582       0.268092       0.105000       0.164500       0.046700   -9999.000000
57293     57293     henan          114.9753       32.7369          109       180     2012      10        14        288              0.232042      20.927338       0.000000       0.267532       0.093500       0.133000       0.062600       0.541000
57293     57293     henan          114.9753       32.7369          109       180     2012      10        15        289              0.234875      21.305481       6.627573       0.264033       0.122000   -9999.000000       0.066500   -9999.000000
57293     57293     henan          114.9753       32.7369          109       180     2012      10        16        290              0.233917      21.067657       0.535650       0.289186       0.140500       0.132900       0.085600   -9999.000000
57293     57293     henan          114.9753       32.7369          109       180     2012      10        17        291              0.232958      16.359283       0.000000       0.309191       0.106000       0.343700   -9999.000000       0.525000
57293     57293     henan          114.9753       32.7369          109       180     2012      10        18        292              0.233625      15.308197       0.000000       0.294758   -9999.000000       0.193600   -9999.000000   -9999.000000
57293     57293     henan          114.9753       32.7369          109       180     2012      10        19        293              0.234375      17.467590       0.000000       0.289727       0.112000       0.080200       0.049300       0.517000
57293     57293     henan          114.9753       32.7369          109       180     2012      10        20        294              0.234750      18.335449       0.000000       0.288607       0.097000   -9999.000000       0.065800   -9999.000000
57293     57293     henan          114.9753       32.7369          109       180     2012      10        21        295              0.234958      20.031128       0.665405       0.286493       0.162500       0.102500       0.069500       0.511000
57293     57293     henan          114.9753       32.7369          109       180     2012      10        22        296              0.232917      20.645905       0.580856       0.285067   -9999.000000       0.119000       0.052900       0.481000
57293     57293     henan          114.9753       32.7369          109       180     2012      10        23        297              0.232208      15.124176       0.000000       0.284216   -9999.000000       0.057600   -9999.000000   -9999.000000
57293     57293     henan          114.9753       32.7369          109       180     2012      10        24        298              0.232208      16.485107       0.483091       0.281160   -9999.000000       0.088100       0.055500       0.458000
57293     57293     henan          114.9753       32.7369          109       180     2012      10        25        299              0.000000      17.268738       2.037002       0.279110       0.131500   -9999.000000       0.074900   -9999.000000
57293     57293     henan          114.9753       32.7369          109       180     2012      10        26        300              0.232000      18.253998       1.982031       0.281522       0.181500   -9999.000000       0.073300       0.829000
57293     57293     henan          114.9753       32.7369          109       180     2012      10        27        301              0.231958      16.257721       0.500525       0.308865       0.140000       0.085600       0.059000       0.480000
57293     57293     henan          114.9753       32.7369          109       180     2012      10        28        302              0.000000      16.800446       0.000000       0.300798       0.149000   -9999.000000   -9999.000000       0.558000
57293     57293     henan          114.9753       32.7369          109       180     2012      10        29        303              0.231833      18.072510       0.423969       0.296496       0.173000       0.111900   -9999.000000       0.687000
57293     57293     henan          114.9753       32.7369          109       180     2012      10        30        304              0.231042      16.157501       0.000000       0.299633       0.176000   -9999.000000       0.046900   -9999.000000
57293     57293     henan          114.9753       32.7369          109       180     2012      10        31        305              0.230500      13.988586       0.000000       0.297526       0.132500   -9999.000000       0.072800       0.361000
57293     57293     henan          114.9753       32.7369          109       180     2012      11        01        306              0.230125      13.095978       1.721367       0.292227       0.129500       0.111900       0.059800   -9999.000000
57293     57293     henan          114.9753       32.7369          109       180     2012      11        02        307              0.230500      14.032928       0.000000       0.291271       0.119000   -9999.000000       0.059000       0.439000
57293     57293     henan          114.9753       32.7369          109       180     2012      11        03        308              0.230458      15.392883      12.716506       0.288122   -9999.000000       0.350300   -9999.000000       0.990000
57293     57293     henan          114.9753       32.7369          109       180     2012      11        04        309              0.230875      10.012604       0.000000       0.346430   -9999.000000   -9999.000000   -9999.000000   -9999.000000
57293     57293     henan          114.9753       32.7369          109       180     2012      11        05        310              0.231000       9.728394       0.000000       0.327668       0.124000       0.270600       0.057300       0.354000
57293     57293     henan          114.9753       32.7369          109       180     2012      11        06        311              0.231292       8.816925       0.107254       0.321329       0.117000       0.107900       0.084500   -9999.000000
57293     57293     henan          114.9753       32.7369          109       180     2012      11        07        312              0.231750      10.043121       2.067013       0.318210       0.128000   -9999.000000       0.061300       0.416000
57293     57293     henan          114.9753       32.7369          109       180     2012      11        08        313              0.232000      12.488403       0.000000       0.320790   -9999.000000       0.133200   -9999.000000   -9999.000000
57293     57293     henan          114.9753       32.7369          109       180     2012      11        09        314              0.233000      11.382935      10.003736       0.325786       0.226000       0.177500   -9999.000000   -9999.000000
57293     57293     henan          114.9753       32.7369          109       180     2012      11        10        315              0.236875      10.913391       0.696963       0.348397       0.185000       0.326600       0.089100       0.842000
57293     57293     henan          114.9753       32.7369          109       180     2012      11        11        316              0.237333       9.174500       0.000000       0.352290       0.142000       0.174800       0.080100   -9999.000000
57293     57293     henan          114.9753       32.7369          109       180     2012      11        12        317              0.237375       8.546875       0.000000       0.341469       0.133000   -9999.000000       0.063400       0.550000
57293     57293     henan          114.9753       32.7369          109       180     2012      11        13        318              0.000000       9.971863       0.000000       0.337340       0.127000       0.131300       0.060000   -9999.000000
57293     57293     henan          114.9753       32.7369          109       180     2012      11        14        319              0.237000      10.309479       0.000000       0.332856   -9999.000000       0.118200   -9999.000000   -9999.000000
57293     57293     henan          114.9753       32.7369          109       180     2012      11        15        320              0.237000       9.226715       0.000000       0.328836       0.144000   -9999.000000   -9999.000000       0.414000
57293     57293     henan          114.9753       32.7369          109       180     2012      11        16        321              0.236625       9.170197       0.208368       0.326576       0.101000       0.179500       0.028400   -9999.000000
57293     57293     henan          114.9753       32.7369          109       180     2012      11        17        322              0.000000       8.829102       0.000000       0.325017       0.123000   -9999.000000       0.067900       0.416000
57293     57293     henan          114.9753       32.7369          109       180     2012      11        18        323              0.236250      10.664825       0.057415       0.323711       0.116000       0.178800       0.055700   -9999.000000
57293     57293     henan          114.9753       32.7369          109       180     2012      11        19        324              0.236000      11.389130       0.000000       0.321953   -9999.000000       0.113700       0.051600       0.356000
57293     57293     henan          114.9753       32.7369          109       180     2012      11        20        325              0.236000      11.148468       6.482626       0.320325   -9999.000000   -9999.000000   -9999.000000       0.430000
57293     57293     henan          114.9753       32.7369          109       180     2012      11        21        326              0.236000       9.042694       0.709844       0.334239       0.171000       0.436200       0.068100   -9999.000000
57293     57293     henan          114.9753       32.7369          109       180     2012      11        22        327              0.236500       9.744995       3.013443       0.345716       0.166000       0.293400       0.063500       0.877000
57293     57293     henan          114.9753       32.7369          109       180     2012      11        23        328              0.237250       9.136017       0.000000       0.348886       0.142000       0.385500       0.072900   -9999.000000
57293     57293     henan          114.9753       32.7369          109       180     2012      11        24        329              0.237458       6.646637       1.084797       0.343745       0.145000       0.258400       0.055700       0.531000
57293     57293     henan          114.9753       32.7369          109       180     2012      11        25        330              0.242583       7.891113       5.725008       0.341501   -9999.000000   -9999.000000   -9999.000000   -9999.000000
57293     57293     henan          114.9753       32.7369          109       180     2012      11        26        331              0.244875       5.236877       0.000000       0.361133   -9999.000000       0.264300   -9999.000000       0.737000
57293     57293     henan          114.9753       32.7369          109       180     2012      11        27        332              0.243292       6.329926       0.000000       0.349237       0.141500       0.139400       0.048500       0.488000
57293     57293     henan          114.9753       32.7369          109       180     2012      11        28        333              0.242000       8.279755       0.000000       0.344270       0.138500       0.251000       0.072600   -9999.000000
57293     57293     henan          114.9753       32.7369          109       180     2012      11        29        334              0.242000       6.859375       0.513520       0.340103       0.140000       0.117700       0.058600       0.572000
57293     57293     henan          114.9753       32.7369          109       180     2012      11        30        335              0.242000       7.458160       0.076403       0.339975   -9999.000000   -9999.000000       0.063400   -9999.000000
57293     57293     henan          114.9753       32.7369          109       180     2012      12        01        336              0.241000       8.336548       3.334570       0.338489   -9999.000000       0.373400   -9999.000000       0.664000
57293     57293     henan          114.9753       32.7369          109       180     2012      12        02        337              0.240917       4.216431       0.076667       0.346959   -9999.000000       0.173000   -9999.000000       0.701000
57293     57293     henan          114.9753       32.7369          109       180     2012      12        03        338              0.240375       3.931091       0.080019       0.346345       0.141000   -9999.000000       0.049900   -9999.000000
57293     57293     henan          114.9753       32.7369          109       180     2012      12        04        339              0.239750       5.214966       0.055773       0.339611       0.158000       0.089600       0.095400       0.318000
57293     57293     henan          114.9753       32.7369          109       180     2012      12        05        340              0.238667       6.198334       0.080408       0.339019   -9999.000000   -9999.000000       0.065900   -9999.000000
57293     57293     henan          114.9753       32.7369          109       180     2012      12        06        341              0.245333       5.324951       0.051470       0.334627       0.160000       0.252300       0.066100       0.307000
57293     57293     henan          114.9753       32.7369          109       180     2012      12        07        342              0.247292       5.836212       0.040213       0.334672       0.118000   -9999.000000   -9999.000000   -9999.000000
57293     57293     henan          114.9753       32.7369          109       180     2012      12        08        343              0.246917       5.492310       0.000000       0.331380       0.137000   -9999.000000       0.063800   -9999.000000
57293     57293     henan          114.9753       32.7369          109       180     2012      12        09        344              0.245583       4.156555       0.040057       0.325129       0.136000       0.134400       0.073700       0.220000
57293     57293     henan          114.9753       32.7369          109       180     2012      12        10        345              0.243333       3.203918       0.040061       0.315050       0.161000       0.087000       0.080900   -9999.000000
57293     57293     henan          114.9753       32.7369          109       180     2012      12        11        346              0.242000       2.765900       0.190681       0.308707   -9999.000000       0.116600       0.055500       0.211000
57293     57293     henan          114.9753       32.7369          109       180     2012      12        12        347              0.242000       2.794922       0.000000       0.303014       0.149000       0.106800   -9999.000000   -9999.000000
57293     57293     henan          114.9753       32.7369          109       180     2012      12        13        348              0.256333       4.023743      25.116686       0.323069       0.224000   -9999.000000   -9999.000000   -9999.000000
57293     57293     henan          114.9753       32.7369          109       180     2012      12        14        349              0.261208       2.692108       0.269947       0.388120   -9999.000000       0.288400       0.050300       0.746000
57293     57293     henan          114.9753       32.7369          109       180     2012      12        15        350              0.000000       2.351624       0.314238       0.368507   -9999.000000   -9999.000000       0.092800   -9999.000000
57293     57293     henan          114.9753       32.7369          109       180     2012      12        16        351              0.258167       2.649811       0.524623       0.364171   -9999.000000   -9999.000000       0.087700       0.787000
57293     57293     henan          114.9753       32.7369          109       180     2012      12        17        352              0.258833       3.263245       1.130558       0.362472   -9999.000000   -9999.000000       0.085400   -9999.000000
57293     57293     henan          114.9753       32.7369          109       180     2012      12        18        353              0.256708       2.677155       0.037950       0.354338   -9999.000000   -9999.000000   -9999.000000       0.806000
57293     57293     henan          114.9753       32.7369          109       180     2012      12        19        354              0.254750       2.180023       0.741804       0.316479       0.168000       0.163600   -9999.000000       0.511000
57293     57293     henan          114.9753       32.7369          109       180     2012      12        20        355              0.000000       1.739990       0.320331       0.323720   -9999.000000       0.091100       0.061700   -9999.000000
57293     57293     henan          114.9753       32.7369          109       180     2012      12        21        356              0.257375       1.036560       1.881433       0.321114   -9999.000000   -9999.000000       0.088000       0.446000
57293     57293     henan          114.9753       32.7369          109       180     2012      12        22        357              0.256250       1.457214       0.047099       0.317851   -9999.000000       0.095300       0.101400   -9999.000000
57293     57293     henan          114.9753       32.7369          109       180     2012      12        23        358              0.252208       1.302979       0.000000       0.300977   -9999.000000   -9999.000000   -9999.000000       0.203000
57293     57293     henan          114.9753       32.7369          109       180     2012      12        24        359              0.251667      -0.100403       0.000000       0.257913       0.125000   -9999.000000   -9999.000000       0.225000
57293     57293     henan          114.9753       32.7369          109       180     2012      12        25        360              0.251875       1.306061       0.000000       0.293334   -9999.000000       0.091000       0.064100       0.382000
57293     57293     henan          114.9753       32.7369          109       180     2012      12        26        361              0.000000       0.493805       0.473094       0.279860   -9999.000000   -9999.000000       0.092500       0.362000
57293     57293     henan          114.9753       32.7369          109       180     2012      12        27        362              0.252909       0.013123       1.950305       0.242971   -9999.000000       0.283800       0.103300   -9999.000000
57293     57293     henan          114.9753       32.7369          109       180     2012      12        28        363              0.257000       0.243378       2.828557       0.255201   -9999.000000   -9999.000000       0.095200       0.568000
57293     57293     henan          114.9753       32.7369          109       180     2012      12        29        364              0.000000       0.507019       2.429074       0.288829   -9999.000000       0.270100   -9999.000000   -9999.000000
57293     57293     henan          114.9753       32.7369          109       180     2012      12        30        365              0.000000      -0.191986       0.953227       0.269577   -9999.000000       0.182700   -9999.000000       0.295000
57293     57293     henan          114.9753       32.7369          109       180     2012      12        31        366              0.260067       0.090546       0.783347       0.252630   -9999.000000   -9999.000000       0.021100   -9999.000000
