# Supplementary material for: Research on Fusing Multisatellite Soil Moisture Data Based on Bayesian Model Averaging
Source: Hindawi journal article supplement (doi:10.1155/2018/9310838), 2018-06-25
Supplement: f1 [file 9310838.f1.zip › 2012_sm00-10cm_daily_ZDB_ZHY_57294_366days_allin.txt]

57294     57294     henan          114.0242       32.8425          109       176     2012      01        01        001              0.000000   -9999.000000       0.212580   -9999.000000   -9999.000000   -9999.000000       0.114000   -9999.000000
57294     57294     henan          114.0242       32.8425          109       176     2012      01        02        002              0.265500       0.566742       0.000000       0.247364       0.106000       0.401300       0.180900   -9999.000000
57294     57294     henan          114.0242       32.8425          109       176     2012      01        03        003              0.000000       2.038788       0.000000       0.292349       0.104000       0.100300   -9999.000000       0.033000
57294     57294     henan          114.0242       32.8425          109       176     2012      01        04        004              0.259708       1.706238       0.000000       0.277341   -9999.000000   -9999.000000   -9999.000000   -9999.000000
57294     57294     henan          114.0242       32.8425          109       176     2012      01        05        005              0.257208       0.995148       0.000000       0.251545   -9999.000000       0.147500       0.121500       0.029000
57294     57294     henan          114.0242       32.8425          109       176     2012      01        06        006              0.257042       1.314392       0.000000       0.257184       0.091000   -9999.000000       0.157000   -9999.000000
57294     57294     henan          114.0242       32.8425          109       176     2012      01        07        007              0.259000       1.991577       0.000000       0.270344       0.104000       0.183200       0.180800       0.329000
57294     57294     henan          114.0242       32.8425          109       176     2012      01        08        008              0.000000       1.775238       0.000000       0.282948       0.103000       0.054100       0.178200       0.045000
57294     57294     henan          114.0242       32.8425          109       176     2012      01        09        009              0.258000       2.663727       0.000000       0.285181       0.103000   -9999.000000   -9999.000000   -9999.000000
57294     57294     henan          114.0242       32.8425          109       176     2012      01        10        010              0.258083       3.089905       0.000000       0.291191   -9999.000000       0.104900       0.090600       0.112000
57294     57294     henan          114.0242       32.8425          109       176     2012      01        11        011              0.257750       2.249847       0.000000       0.289175   -9999.000000       0.123400       0.084000   -9999.000000
57294     57294     henan          114.0242       32.8425          109       176     2012      01        12        012              0.257583       1.306335       0.000000       0.268028   -9999.000000       0.046600       0.088900       0.205000
57294     57294     henan          114.0242       32.8425          109       176     2012      01        13        013              0.257792       1.011810       0.000000       0.267883       0.122000       0.080200       0.102800       0.060000
57294     57294     henan          114.0242       32.8425          109       176     2012      01        14        014              0.258000       1.377075       0.078143       0.281385   -9999.000000   -9999.000000   -9999.000000   -9999.000000
57294     57294     henan          114.0242       32.8425          109       176     2012      01        15        015              0.258125       1.355927       0.000000       0.287538   -9999.000000       0.117300   -9999.000000       0.224000
57294     57294     henan          114.0242       32.8425          109       176     2012      01        16        016              0.258000       3.392303       2.574701       0.306734   -9999.000000       0.293700       0.058800   -9999.000000
57294     57294     henan          114.0242       32.8425          109       176     2012      01        17        017              0.000000       2.674347       2.131245       0.309456       0.126000   -9999.000000       0.089800       0.439000
57294     57294     henan          114.0242       32.8425          109       176     2012      01        18        018              0.277000       2.524231       0.613255       0.313166   -9999.000000       0.193500       0.088400   -9999.000000
57294     57294     henan          114.0242       32.8425          109       176     2012      01        19        019              0.279500       2.139862       0.558267       0.314652   -9999.000000   -9999.000000       0.098000   -9999.000000
57294     57294     henan          114.0242       32.8425          109       176     2012      01        20        020              0.278375       2.140411       0.507656       0.312873   -9999.000000       0.205200   -9999.000000       0.552000
57294     57294     henan          114.0242       32.8425          109       176     2012      01        21        021              0.273750       1.864990       0.000000       0.296398   -9999.000000       0.281200   -9999.000000   -9999.000000
57294     57294     henan          114.0242       32.8425          109       176     2012      01        22        022              0.267042      -0.477783       0.290290       0.229519   -9999.000000       0.193700       0.047600       0.006000
57294     57294     henan          114.0242       32.8425          109       176     2012      01        23        023              0.263167      -1.294434       0.000000       0.203985       0.127000       0.074500       0.102700   -9999.000000
57294     57294     henan          114.0242       32.8425          109       176     2012      01        24        024              0.261792       0.552155       0.000000       0.230901       0.120000   -9999.000000   -9999.000000   -9999.000000
57294     57294     henan          114.0242       32.8425          109       176     2012      01        25        025              0.259083       0.453857       0.000000       0.235964   -9999.000000       0.147500       0.123400       0.168000
57294     57294     henan          114.0242       32.8425          109       176     2012      01        26        026              0.261583       1.759186       0.000000       0.258244   -9999.000000       0.027500   -9999.000000   -9999.000000
57294     57294     henan          114.0242       32.8425          109       176     2012      01        27        027              0.265042       3.136200       0.000000       0.281575       0.105000   -9999.000000       0.100700       0.252000
57294     57294     henan          114.0242       32.8425          109       176     2012      01        28        028              0.265833       3.194458       0.000000       0.299951       0.113000       0.127000       0.113200   -9999.000000
57294     57294     henan          114.0242       32.8425          109       176     2012      01        29        029              0.270292       3.577362       0.168852       0.303440   -9999.000000       0.268800       0.113000       0.337000
57294     57294     henan          114.0242       32.8425          109       176     2012      01        30        030              0.269250       1.986420       0.000000       0.293351       0.118000       0.117400       0.144700       0.242000
57294     57294     henan          114.0242       32.8425          109       176     2012      01        31        031              0.267125       2.700073       0.000000       0.293931   -9999.000000       0.101200   -9999.000000   -9999.000000
57294     57294     henan          114.0242       32.8425          109       176     2012      02        01        032              0.264125       5.806885       0.000000       0.305198   -9999.000000   -9999.000000   -9999.000000       0.078000
57294     57294     henan          114.0242       32.8425          109       176     2012      02        02        033              0.261708       1.047150       0.000000       0.272969       0.108000       0.065500       0.084700   -9999.000000
57294     57294     henan          114.0242       32.8425          109       176     2012      02        03        034              0.259958       1.687592       0.000000       0.261909       0.115000       0.160800       0.121100       0.032000
57294     57294     henan          114.0242       32.8425          109       176     2012      02        04        035              0.260167       3.479431       0.000000       0.280777   -9999.000000   -9999.000000       0.121900   -9999.000000
57294     57294     henan          114.0242       32.8425          109       176     2012      02        05        036              0.261083       1.816864       0.265865       0.284819   -9999.000000       0.156200       0.135200       0.494000
57294     57294     henan          114.0242       32.8425          109       176     2012      02        06        037              0.260500       5.120422       0.000000       0.305903   -9999.000000   -9999.000000   -9999.000000       0.048000
57294     57294     henan          114.0242       32.8425          109       176     2012      02        07        038              0.257167       5.582275       0.000000       0.299110   -9999.000000       0.086700       0.123700   -9999.000000
57294     57294     henan          114.0242       32.8425          109       176     2012      02        08        039              0.255208       2.368927       0.000000       0.265052   -9999.000000       0.222300       0.103900       0.182000
57294     57294     henan          114.0242       32.8425          109       176     2012      02        09        040              0.255458       2.233856       0.000000       0.256946   -9999.000000       0.046600       0.124800   -9999.000000
57294     57294     henan          114.0242       32.8425          109       176     2012      02        10        041              0.254500       1.443756       0.000000       0.264697   -9999.000000       0.114100       0.135000       0.081000
57294     57294     henan          114.0242       32.8425          109       176     2012      02        11        042              0.252375       3.402496       0.000000       0.269945   -9999.000000   -9999.000000       0.132700       0.014000
57294     57294     henan          114.0242       32.8425          109       176     2012      02        12        043              0.252000       4.693329       0.000000       0.289686   -9999.000000   -9999.000000   -9999.000000   -9999.000000
57294     57294     henan          114.0242       32.8425          109       176     2012      02        13        044              0.252000       2.436981       0.000000       0.283810   -9999.000000       0.143900   -9999.000000       0.054000
57294     57294     henan          114.0242       32.8425          109       176     2012      02        14        045              0.252500       1.880676       4.470232       0.285087       0.117000   -9999.000000       0.114800   -9999.000000
57294     57294     henan          114.0242       32.8425          109       176     2012      02        15        046              0.259542       4.206116       1.593573       0.302556   -9999.000000   -9999.000000       0.115300       0.451000
57294     57294     henan          114.0242       32.8425          109       176     2012      02        16        047              0.261125       3.099426       0.000000       0.308891   -9999.000000   -9999.000000       0.125500   -9999.000000
57294     57294     henan          114.0242       32.8425          109       176     2012      02        17        048              0.258333       4.379822       0.000000       0.305606   -9999.000000   -9999.000000   -9999.000000   -9999.000000
57294     57294     henan          114.0242       32.8425          109       176     2012      02        18        049              0.256208       4.633118       0.000000       0.289681       0.087000       0.097300   -9999.000000       0.115000
57294     57294     henan          114.0242       32.8425          109       176     2012      02        19        050              0.255292       4.860565       0.000000       0.288812       0.102000   -9999.000000       0.092400   -9999.000000
57294     57294     henan          114.0242       32.8425          109       176     2012      02        20        051              0.253375       6.812866       0.000000       0.298677       0.107000       0.130300       0.093900       0.191000
57294     57294     henan          114.0242       32.8425          109       176     2012      02        21        052              0.252391       6.199921       0.000000       0.301462   -9999.000000       0.118200   -9999.000000   -9999.000000
57294     57294     henan          114.0242       32.8425          109       176     2012      02        22        053              0.252000      10.047546       0.091529       0.299290   -9999.000000   -9999.000000       0.106800   -9999.000000
57294     57294     henan          114.0242       32.8425          109       176     2012      02        23        054              0.250667       9.678711       0.135532       0.299332       0.109500       0.262600   -9999.000000       0.264000
57294     57294     henan          114.0242       32.8425          109       176     2012      02        24        055              0.249500       5.226196       2.337956       0.299969       0.105000   -9999.000000       0.104100   -9999.000000
57294     57294     henan          114.0242       32.8425          109       176     2012      02        25        056              0.248833       4.440094       0.099508       0.299297       0.107000       0.011400       0.081800       0.131000
57294     57294     henan          114.0242       32.8425          109       176     2012      02        26        057              0.247458       4.217346       0.000000       0.295827   -9999.000000       0.178800       0.099500   -9999.000000
57294     57294     henan          114.0242       32.8425          109       176     2012      02        27        058              0.246500       4.902679       0.000000       0.286371   -9999.000000       0.072000   -9999.000000       0.143000
57294     57294     henan          114.0242       32.8425          109       176     2012      02        28        059              0.245708       4.693909       0.000000       0.291963       0.099000       0.104700   -9999.000000       0.292000
57294     57294     henan          114.0242       32.8425          109       176     2012      02        29        060              0.000000   -9999.000000       0.000000   -9999.000000       0.106500   -9999.000000   -9999.000000   -9999.000000
57294     57294     henan          114.0242       32.8425          109       176     2012      03        01        061              0.245000       7.049591       0.131312       0.294337       0.149000       0.143100       0.066800       0.109000
57294     57294     henan          114.0242       32.8425          109       176     2012      03        02        062              0.245000       4.183289       0.088533       0.298183   -9999.000000       0.008300       0.087100   -9999.000000
57294     57294     henan          114.0242       32.8425          109       176     2012      03        03        063              0.245958       4.242706       0.677533       0.299741   -9999.000000   -9999.000000       0.078900       0.275000
57294     57294     henan          114.0242       32.8425          109       176     2012      03        04        064              0.246000       3.381134       0.000000       0.301493       0.137500       0.096300       0.086500       0.362000
57294     57294     henan          114.0242       32.8425          109       176     2012      03        05        065              0.245625       3.427612       0.000000       0.298782       0.136000   -9999.000000   -9999.000000       0.367000
57294     57294     henan          114.0242       32.8425          109       176     2012      03        06        066              0.243625       6.903961       0.212282       0.298950       0.117000   -9999.000000   -9999.000000       0.105000
57294     57294     henan          114.0242       32.8425          109       176     2012      03        07        067              0.000000       8.497070       0.135369       0.296291       0.133000       0.074600       0.075200   -9999.000000
57294     57294     henan          114.0242       32.8425          109       176     2012      03        08        068              0.240333       9.043884       0.000000       0.294301   -9999.000000   -9999.000000       0.104700       0.155000
57294     57294     henan          114.0242       32.8425          109       176     2012      03        09        069              0.237625       7.398254       0.242895       0.293939   -9999.000000       0.106800       0.099300   -9999.000000
57294     57294     henan          114.0242       32.8425          109       176     2012      03        10        070              0.236652       6.952545       0.000000       0.293233       0.114000   -9999.000000       0.107800       0.140000
57294     57294     henan          114.0242       32.8425          109       176     2012      03        11        071              0.233542      10.756470       0.000000       0.289802       0.120000       0.190200   -9999.000000   -9999.000000
57294     57294     henan          114.0242       32.8425          109       176     2012      03        12        072              0.231750       6.643219       0.000000       0.287631       0.122000   -9999.000000       0.115600   -9999.000000
57294     57294     henan          114.0242       32.8425          109       176     2012      03        13        073              0.229667       8.889893       0.000000       0.287920   -9999.000000   -9999.000000       0.098900       0.170000
57294     57294     henan          114.0242       32.8425          109       176     2012      03        14        074              0.227458      12.973022       0.228380       0.284476       0.122000   -9999.000000       0.124000   -9999.000000
57294     57294     henan          114.0242       32.8425          109       176     2012      03        15        075              0.231042      13.889648       4.592182       0.283547       0.166500       0.161300       0.147900       0.460000
57294     57294     henan          114.0242       32.8425          109       176     2012      03        16        076              0.232167       7.551941       0.000000       0.309467       0.140500       0.102200   -9999.000000   -9999.000000
57294     57294     henan          114.0242       32.8425          109       176     2012      03        17        077              0.230250      11.740265       0.000000       0.298760       0.135000       0.056500   -9999.000000   -9999.000000
57294     57294     henan          114.0242       32.8425          109       176     2012      03        18        078              0.228000      14.293732       0.078506       0.292735   -9999.000000   -9999.000000       0.118700       0.042000
57294     57294     henan          114.0242       32.8425          109       176     2012      03        19        079              0.228000       8.959808       0.293719       0.293836       0.140000       0.080200       0.185400   -9999.000000
57294     57294     henan          114.0242       32.8425          109       176     2012      03        20        080              0.227417       4.677765       0.000000       0.296011       0.123000       0.102500       0.180500       0.028000
57294     57294     henan          114.0242       32.8425          109       176     2012      03        21        081              0.288458       6.137451      40.388973       0.294909       0.218000   -9999.000000       0.108700   -9999.000000
57294     57294     henan          114.0242       32.8425          109       176     2012      03        22        082              0.313083       5.923004       0.467812       0.361424       0.230000       0.108900   -9999.000000   -9999.000000
57294     57294     henan          114.0242       32.8425          109       176     2012      03        23        083              0.291375       5.652863       0.000000       0.355972   -9999.000000   -9999.000000   -9999.000000       0.443000
57294     57294     henan          114.0242       32.8425          109       176     2012      03        24        084              0.274375      10.210602       0.000000       0.338707   -9999.000000       0.208600   -9999.000000   -9999.000000
57294     57294     henan          114.0242       32.8425          109       176     2012      03        25        085              0.000000      13.751190       0.000000       0.328891       0.155000       0.149800       0.180600       0.205000
57294     57294     henan          114.0242       32.8425          109       176     2012      03        26        086              0.257913      15.766815       0.212189       0.322055       0.158000   -9999.000000       0.196900   -9999.000000
57294     57294     henan          114.0242       32.8425          109       176     2012      03        27        087              0.253125      17.681305       0.000000       0.316222       0.162500       0.251100       0.207400       0.196000
57294     57294     henan          114.0242       32.8425          109       176     2012      03        28        088              0.248708      18.739441       0.211364       0.311030       0.155000   -9999.000000   -9999.000000       0.265000
57294     57294     henan          114.0242       32.8425          109       176     2012      03        29        089              0.247125      19.682526       0.047561       0.307039   -9999.000000   -9999.000000       0.198500   -9999.000000
57294     57294     henan          114.0242       32.8425          109       176     2012      03        30        090              0.249125      16.687073       4.754071       0.309441   -9999.000000   -9999.000000       0.192400       0.281000
57294     57294     henan          114.0242       32.8425          109       176     2012      03        31        091              0.246792      12.992523       0.000000       0.326351       0.144500   -9999.000000       0.195000   -9999.000000
57294     57294     henan          114.0242       32.8425          109       176     2012      04        01        092              0.241292      16.930573       0.000000       0.310142       0.171000   -9999.000000       0.201300       0.199000
57294     57294     henan          114.0242       32.8425          109       176     2012      04        02        093              0.237000      19.186707       0.706908       0.301808       0.154000   -9999.000000   -9999.000000   -9999.000000
57294     57294     henan          114.0242       32.8425          109       176     2012      04        03        094              0.232542      12.916351       0.216051       0.302079   -9999.000000       0.083500   -9999.000000       0.006000
57294     57294     henan          114.0242       32.8425          109       176     2012      04        04        095              0.228125      16.143616       0.000000       0.297464       0.167000   -9999.000000       0.161200       0.021000
57294     57294     henan          114.0242       32.8425          109       176     2012      04        05        096              0.223292      16.938568       0.000000       0.294484       0.158500   -9999.000000       0.184000   -9999.000000
57294     57294     henan          114.0242       32.8425          109       176     2012      04        06        097              0.217750      18.048889       0.000000       0.289680       0.152500       0.053200       0.182700       0.152000
57294     57294     henan          114.0242       32.8425          109       176     2012      04        07        098              0.211083      19.512024       0.000000       0.284701       0.137000       0.024200       0.179700   -9999.000000
57294     57294     henan          114.0242       32.8425          109       176     2012      04        08        099              0.205000      19.802521       0.000000       0.280972   -9999.000000   -9999.000000   -9999.000000       0.088000
57294     57294     henan          114.0242       32.8425          109       176     2012      04        09        100              0.202000      21.010223       0.288268       0.277028       0.152000       0.026600   -9999.000000   -9999.000000
57294     57294     henan          114.0242       32.8425          109       176     2012      04        10        101              0.199833      18.149597       0.000000       0.280574       0.137000   -9999.000000       0.158400   -9999.000000
57294     57294     henan          114.0242       32.8425          109       176     2012      04        11        102              0.196583      19.340912       0.000000       0.280405       0.174500       0.107300       0.179900       0.099000
57294     57294     henan          114.0242       32.8425          109       176     2012      04        12        103              0.192333      19.774719       1.800914       0.277446       0.194000   -9999.000000       0.209300   -9999.000000
57294     57294     henan          114.0242       32.8425          109       176     2012      04        13        104              0.189542      13.535858       0.195657       0.287899       0.173000   -9999.000000       0.184000       0.196000
57294     57294     henan          114.0242       32.8425          109       176     2012      04        14        105              0.186875      18.814545       0.022725       0.280331       0.184000       0.170200   -9999.000000   -9999.000000
57294     57294     henan          114.0242       32.8425          109       176     2012      04        15        106              0.183958      16.479034       0.050545       0.279322       0.183000       0.146700       0.171100   -9999.000000
57294     57294     henan          114.0242       32.8425          109       176     2012      04        16        107              0.181542      18.723755       0.000000       0.274962       0.148000   -9999.000000       0.206700       0.117000
57294     57294     henan          114.0242       32.8425          109       176     2012      04        17        108              0.179958      18.762695       0.896524       0.273425       0.176000   -9999.000000       0.201200   -9999.000000
57294     57294     henan          114.0242       32.8425          109       176     2012      04        18        109              0.178375      20.456268       0.000000       0.268974       0.161000   -9999.000000   -9999.000000       0.134000
57294     57294     henan          114.0242       32.8425          109       176     2012      04        19        110              0.175583      19.695374       0.000000       0.268193   -9999.000000   -9999.000000   -9999.000000   -9999.000000
57294     57294     henan          114.0242       32.8425          109       176     2012      04        20        111              0.172000      22.737701       2.083377       0.261071       0.180000       0.137800   -9999.000000   -9999.000000
57294     57294     henan          114.0242       32.8425          109       176     2012      04        21        112              0.170167      16.921814       0.000000       0.267930       0.197000   -9999.000000       0.175800       0.169000
57294     57294     henan          114.0242       32.8425          109       176     2012      04        22        113              0.165250      21.749298       0.000000       0.259333       0.181000       0.205600       0.220900   -9999.000000
57294     57294     henan          114.0242       32.8425          109       176     2012      04        23        114              0.185625      24.542389      29.445999       0.247573       0.163000   -9999.000000       0.201900       0.795000
57294     57294     henan          114.0242       32.8425          109       176     2012      04        24        115              0.293458      25.372314       2.580078       0.305689   -9999.000000       0.251700       0.252300   -9999.000000
57294     57294     henan          114.0242       32.8425          109       176     2012      04        25        116              0.000000      19.237244       0.040000       0.337593       0.229000       0.159800   -9999.000000       0.383000
57294     57294     henan          114.0242       32.8425          109       176     2012      04        26        117              0.264250      19.112762       0.000000       0.316432       0.199500   -9999.000000   -9999.000000       0.259000
57294     57294     henan          114.0242       32.8425          109       176     2012      04        27        118              0.250917      21.688446       0.072363       0.302126       0.179500       0.169400   -9999.000000   -9999.000000
57294     57294     henan          114.0242       32.8425          109       176     2012      04        28        119              0.243696      24.339386       4.306934       0.293413       0.165000   -9999.000000       0.206000       0.211000
57294     57294     henan          114.0242       32.8425          109       176     2012      04        29        120              0.237609      23.654724       0.050090       0.303940   -9999.000000       0.084300       0.221000   -9999.000000
57294     57294     henan          114.0242       32.8425          109       176     2012      04        30        121              0.237083      21.530090      10.352442       0.296892       0.214000       0.242800   -9999.000000       0.707000
57294     57294     henan          114.0242       32.8425          109       176     2012      05        01        122              0.239083      19.761108       0.119407       0.327076       0.197500   -9999.000000   -9999.000000   -9999.000000
57294     57294     henan          114.0242       32.8425          109       176     2012      05        02        123              0.235417      19.650208       0.000000       0.320457       0.206500       0.106000       0.183300       0.317000
57294     57294     henan          114.0242       32.8425          109       176     2012      05        03        124              0.229708      22.786713       0.000000       0.308395       0.184000       0.194300       0.178200       0.073000
57294     57294     henan          114.0242       32.8425          109       176     2012      05        04        125              0.221000      23.601410       0.000000       0.301649       0.169000   -9999.000000       0.189500   -9999.000000
57294     57294     henan          114.0242       32.8425          109       176     2012      05        05        126              0.206650      25.454590       0.000000       0.291704       0.199000   -9999.000000       0.194100       0.236000
57294     57294     henan          114.0242       32.8425          109       176     2012      05        06        127              0.195375      26.944916       0.000000       0.281744       0.200000   -9999.000000   -9999.000000   -9999.000000
57294     57294     henan          114.0242       32.8425          109       176     2012      05        07        128              0.192625      28.290741       2.465190       0.271746   -9999.000000       0.112900   -9999.000000       0.379000
57294     57294     henan          114.0242       32.8425          109       176     2012      05        08        129              0.192375      24.729492       0.414670       0.291762       0.205500       0.240100       0.149200       0.214000
57294     57294     henan          114.0242       32.8425          109       176     2012      05        09        130              0.194000      24.282043       0.000000       0.288897       0.195000       0.214300       0.174200   -9999.000000
57294     57294     henan          114.0242       32.8425          109       176     2012      05        10        131              0.186458      26.858002       0.000000       0.276801   -9999.000000   -9999.000000       0.162600       0.098000
57294     57294     henan          114.0242       32.8425          109       176     2012      05        11        132              0.179792      26.696594       2.908664       0.264354       0.159000   -9999.000000       0.174100   -9999.000000
57294     57294     henan          114.0242       32.8425          109       176     2012      05        12        133              0.191375      27.174622       3.536975       0.261801       0.202000       0.223400   -9999.000000       0.470000
57294     57294     henan          114.0242       32.8425          109       176     2012      05        13        134              0.202208      20.786163       1.704910       0.299293       0.158000       0.111300       0.172600   -9999.000000
57294     57294     henan          114.0242       32.8425          109       176     2012      05        14        135              0.207000      22.624817       1.238283       0.290264       0.163000   -9999.000000       0.138700   -9999.000000
57294     57294     henan          114.0242       32.8425          109       176     2012      05        15        136              0.204000      22.578949       0.000000       0.286149   -9999.000000       0.109000       0.155800       0.328000
57294     57294     henan          114.0242       32.8425          109       176     2012      05        16        137              0.198500      24.803284       0.000000       0.271653       0.184000   -9999.000000       0.172400   -9999.000000
57294     57294     henan          114.0242       32.8425          109       176     2012      05        17        138              0.192167      26.519775       0.000000       0.257892       0.156500       0.101700       0.160300       0.252000
57294     57294     henan          114.0242       32.8425          109       176     2012      05        18        139              0.185125      27.652222       0.195546       0.244003       0.166000       0.106200   -9999.000000   -9999.000000
57294     57294     henan          114.0242       32.8425          109       176     2012      05        19        140              0.182458      25.905640       0.000000       0.241090       0.138000   -9999.000000       0.141000   -9999.000000
57294     57294     henan          114.0242       32.8425          109       176     2012      05        20        141              0.176917      27.209412       0.000000       0.230152   -9999.000000       0.051300       0.154000       0.335000
57294     57294     henan          114.0242       32.8425          109       176     2012      05        21        142              0.170792      26.321655       0.000000       0.218590       0.164000       0.263000       0.124400   -9999.000000
57294     57294     henan          114.0242       32.8425          109       176     2012      05        22        143              0.164542      26.267426       0.272459       0.211855       0.151500   -9999.000000       0.132000       0.405000
57294     57294     henan          114.0242       32.8425          109       176     2012      05        23        144              0.161208      24.519714       0.070135       0.212693   -9999.000000       0.170500   -9999.000000   -9999.000000
57294     57294     henan          114.0242       32.8425          109       176     2012      05        24        145              0.170625      25.025970       0.662620       0.213183   -9999.000000   -9999.000000   -9999.000000       0.173000
57294     57294     henan          114.0242       32.8425          109       176     2012      05        25        146              0.000000      23.919861       0.119370       0.220596   -9999.000000       0.062000       0.100000       0.368000
57294     57294     henan          114.0242       32.8425          109       176     2012      05        26        147              0.183208      23.649109       0.000000       0.220855       0.170000   -9999.000000       0.119000   -9999.000000
57294     57294     henan          114.0242       32.8425          109       176     2012      05        27        148              0.180292      27.840851       0.039216       0.205394       0.181000   -9999.000000       0.137400       0.212000
57294     57294     henan          114.0242       32.8425          109       176     2012      05        28        149              0.179500      26.539551       0.000000       0.200595       0.145500       0.225700       0.124700   -9999.000000
57294     57294     henan          114.0242       32.8425          109       176     2012      05        29        150              0.242250      28.589905      18.605686       0.190053       0.228000   -9999.000000   -9999.000000       0.818000
57294     57294     henan          114.0242       32.8425          109       176     2012      05        30        151              0.251417      20.856903       0.000000       0.307318       0.185000       0.388000       0.136800   -9999.000000
57294     57294     henan          114.0242       32.8425          109       176     2012      05        31        152              0.245083      25.540741       0.106418       0.284751   -9999.000000       0.261800   -9999.000000   -9999.000000
57294     57294     henan          114.0242       32.8425          109       176     2012      06        01        153              0.243125      25.194214       0.321699       0.269706       0.171000       0.234900       0.145200       0.344000
57294     57294     henan          114.0242       32.8425          109       176     2012      06        02        154              0.243875      22.711945       0.065978       0.268272       0.157500       0.152100       0.156800   -9999.000000
57294     57294     henan          114.0242       32.8425          109       176     2012      06        03        155              0.244167      25.982788       0.000000       0.254025       0.161000   -9999.000000   -9999.000000       0.396000
57294     57294     henan          114.0242       32.8425          109       176     2012      06        04        156              0.243208      25.463287       0.000000       0.247748       0.134000       0.237900   -9999.000000   -9999.000000
57294     57294     henan          114.0242       32.8425          109       176     2012      06        05        157              0.241208      27.451904       4.834555       0.236462   -9999.000000       0.145200       0.086400       0.491000
57294     57294     henan          114.0242       32.8425          109       176     2012      06        06        158              0.238917      26.921906       0.219391       0.259008       0.209000   -9999.000000       0.083800       0.382000
57294     57294     henan          114.0242       32.8425          109       176     2012      06        07        159              0.239167      25.100769       0.000000       0.264588       0.155000       0.247700       0.091300   -9999.000000
57294     57294     henan          114.0242       32.8425          109       176     2012      06        08        160              0.240667      27.630005       0.000000       0.248845       0.155000       0.146900       0.088500       0.437000
57294     57294     henan          114.0242       32.8425          109       176     2012      06        09        161              0.237625      29.950287       0.000000       0.229505       0.131000   -9999.000000   -9999.000000   -9999.000000
57294     57294     henan          114.0242       32.8425          109       176     2012      06        10        162              0.245042      32.025970       1.196105       0.212330   -9999.000000       0.307600   -9999.000000       0.423000
57294     57294     henan          114.0242       32.8425          109       176     2012      06        11        163              0.000000      31.009003       0.000000       0.209420       0.151000   -9999.000000       0.059900   -9999.000000
57294     57294     henan          114.0242       32.8425          109       176     2012      06        12        164              0.244167      28.314148       0.000000       0.201987       0.140000       0.168700       0.078900   -9999.000000
57294     57294     henan          114.0242       32.8425          109       176     2012      06        13        165              0.241083      32.131256       0.225984       0.187297       0.142500   -9999.000000       0.084400       0.424000
57294     57294     henan          114.0242       32.8425          109       176     2012      06        14        166              0.233417      33.845184       0.000000       0.178828       0.145500   -9999.000000       0.085800   -9999.000000
57294     57294     henan          114.0242       32.8425          109       176     2012      06        15        167              0.230875      29.686310       0.000000       0.178393       0.132000   -9999.000000   -9999.000000       0.363000
57294     57294     henan          114.0242       32.8425          109       176     2012      06        16        168              0.225958      31.561951       0.163617       0.174328   -9999.000000   -9999.000000       0.078200   -9999.000000
57294     57294     henan          114.0242       32.8425          109       176     2012      06        17        169              0.220375      31.664795       0.000000       0.172686       0.167000   -9999.000000       0.067600   -9999.000000
57294     57294     henan          114.0242       32.8425          109       176     2012      06        18        170              0.218250      30.015472       0.826913       0.173163       0.139000       0.250700       0.069100       0.386000
57294     57294     henan          114.0242       32.8425          109       176     2012      06        19        171              0.213792      32.667877       0.000000       0.170772       0.137000       0.224600       0.070600   -9999.000000
57294     57294     henan          114.0242       32.8425          109       176     2012      06        20        172              0.207833      33.496918       0.000000       0.168919       0.126000       0.047500   -9999.000000       0.290000
57294     57294     henan          114.0242       32.8425          109       176     2012      06        21        173              0.201292      33.530884       0.000000       0.167304   -9999.000000   -9999.000000   -9999.000000   -9999.000000
57294     57294     henan          114.0242       32.8425          109       176     2012      06        22        174              0.195208      34.206573       0.000000       0.166567       0.164000   -9999.000000       0.055900       0.297000
57294     57294     henan          114.0242       32.8425          109       176     2012      06        23        175              0.187958      35.654510       0.000000       0.165840       0.138500       0.109000       0.067300       0.428000
57294     57294     henan          114.0242       32.8425          109       176     2012      06        24        176              0.181417      34.777130       0.000000       0.165503       0.136000   -9999.000000       0.066800   -9999.000000
57294     57294     henan          114.0242       32.8425          109       176     2012      06        25        177              0.174625      35.482025       1.556738       0.164490       0.130000       0.272200       0.048000       0.231000
57294     57294     henan          114.0242       32.8425          109       176     2012      06        26        178              0.168524      34.573212       0.076838       0.164239   -9999.000000   -9999.000000   -9999.000000   -9999.000000
57294     57294     henan          114.0242       32.8425          109       176     2012      06        27        179              0.168917      31.960083       3.989307       0.164805       0.227000   -9999.000000   -9999.000000       0.865000
57294     57294     henan          114.0242       32.8425          109       176     2012      06        28        180              0.275625      26.486633      14.182981       0.193577       0.247000       0.193400       0.054000   -9999.000000
57294     57294     henan          114.0242       32.8425          109       176     2012      06        29        181              0.283417      25.788330       6.894781       0.301812       0.201000   -9999.000000       0.060700       0.851000
57294     57294     henan          114.0242       32.8425          109       176     2012      06        30        182              0.319542      28.102081      24.119747       0.288258   -9999.000000       0.198100       0.065800   -9999.000000
57294     57294     henan          114.0242       32.8425          109       176     2012      07        01        183              0.325500      24.693878      12.692615       0.350310       0.239000       0.525000       0.073000   -9999.000000
57294     57294     henan          114.0242       32.8425          109       176     2012      07        02        184              0.320833      25.515411       1.835476       0.354195       0.299000       0.243500   -9999.000000       0.937000
57294     57294     henan          114.0242       32.8425          109       176     2012      07        03        185              0.314125      26.805939       2.485361       0.334105       0.272000   -9999.000000       0.077900   -9999.000000
57294     57294     henan          114.0242       32.8425          109       176     2012      07        04        186              0.299375      29.351990      13.386817       0.323473       0.239500   -9999.000000       0.066000       0.722000
57294     57294     henan          114.0242       32.8425          109       176     2012      07        05        187              0.317042      29.777924      20.047556       0.339115   -9999.000000       0.133900       0.082700       0.986000
57294     57294     henan          114.0242       32.8425          109       176     2012      07        06        188              0.338958      25.599457       0.283122       0.366987   -9999.000000       0.378800       0.084600   -9999.000000
57294     57294     henan          114.0242       32.8425          109       176     2012      07        07        189              0.339542      28.979431       2.886479       0.340223   -9999.000000       0.224600   -9999.000000       0.750000
57294     57294     henan          114.0242       32.8425          109       176     2012      07        08        190              0.327292      30.896759       0.120847       0.333478       0.251000       0.099300   -9999.000000   -9999.000000
57294     57294     henan          114.0242       32.8425          109       176     2012      07        09        191              0.316917      31.915009       3.887628       0.319434       0.227000   -9999.000000       0.073700       0.654000
57294     57294     henan          114.0242       32.8425          109       176     2012      07        10        192              0.312625      31.421478       6.482446       0.317941       0.222000       0.303500       0.090000   -9999.000000
57294     57294     henan          114.0242       32.8425          109       176     2012      07        11        193              0.307292      28.795654       0.000000       0.336622       0.191000       0.113000       0.080800   -9999.000000
57294     57294     henan          114.0242       32.8425          109       176     2012      07        12        194              0.296417      32.686829       0.014386       0.314568   -9999.000000   -9999.000000       0.083900       0.620000
57294     57294     henan          114.0242       32.8425          109       176     2012      07        13        195              0.309917      30.416718      14.800801       0.307499   -9999.000000       0.259200   -9999.000000   -9999.000000
57294     57294     henan          114.0242       32.8425          109       176     2012      07        14        196              0.354042      28.441284       0.119334       0.324880       0.227000       0.164900   -9999.000000       0.705000
57294     57294     henan          114.0242       32.8425          109       176     2012      07        15        197              0.340250      26.696716       0.000000       0.334293       0.212500       0.136800       0.069000   -9999.000000
57294     57294     henan          114.0242       32.8425          109       176     2012      07        16        198              0.326417      28.248077       0.000000       0.316850       0.172000       0.185300       0.094100   -9999.000000
57294     57294     henan          114.0242       32.8425          109       176     2012      07        17        199              0.314917      29.005951       0.000000       0.304787       0.173000   -9999.000000       0.094800       0.715000
57294     57294     henan          114.0242       32.8425          109       176     2012      07        18        200              0.303500      29.095825       0.000000       0.297151       0.219000       0.288400       0.086800   -9999.000000
57294     57294     henan          114.0242       32.8425          109       176     2012      07        19        201              0.291333      29.707184       0.000000       0.288048       0.220000       0.143300   -9999.000000       0.589000
57294     57294     henan          114.0242       32.8425          109       176     2012      07        20        202              0.278875      30.464996       0.260233       0.278764       0.195000       0.060700       0.080800   -9999.000000
57294     57294     henan          114.0242       32.8425          109       176     2012      07        21        203              0.263333      31.383636       0.000000       0.273924       0.232000       0.411700       0.083700       0.586000
57294     57294     henan          114.0242       32.8425          109       176     2012      07        22        204              0.255167      32.537354       1.305892       0.262053       0.233000   -9999.000000       0.094800       0.620000
57294     57294     henan          114.0242       32.8425          109       176     2012      07        23        205              0.247167      29.658447       0.000000       0.268797   -9999.000000       0.032700       0.137300   -9999.000000
57294     57294     henan          114.0242       32.8425          109       176     2012      07        24        206              0.275583      31.739349      16.751020       0.253342       0.283000       0.192300   -9999.000000       0.856000
57294     57294     henan          114.0242       32.8425          109       176     2012      07        25        207              0.278125      31.509705       0.669874       0.313575       0.262000       0.257800   -9999.000000   -9999.000000
57294     57294     henan          114.0242       32.8425          109       176     2012      07        26        208              0.256708      32.291779       0.316475       0.300142       0.227500       0.121500       0.116900       0.549000
57294     57294     henan          114.0242       32.8425          109       176     2012      07        27        209              0.240958      32.856140       0.000000       0.278763       0.216000   -9999.000000       0.145400   -9999.000000
57294     57294     henan          114.0242       32.8425          109       176     2012      07        28        210              0.230208      32.964050       0.275107       0.262349   -9999.000000       0.067500       0.129900       0.658000
57294     57294     henan          114.0242       32.8425          109       176     2012      07        29        211              0.221125      33.147217       0.403473       0.252098       0.240000       0.163600       0.131400       0.509000
57294     57294     henan          114.0242       32.8425          109       176     2012      07        30        212              0.212833      33.819397       0.226534       0.242026       0.246000   -9999.000000   -9999.000000   -9999.000000
57294     57294     henan          114.0242       32.8425          109       176     2012      07        31        213              0.205958      34.564392       1.756709       0.232582       0.237000       0.145800       0.105600       0.529000
57294     57294     henan          114.0242       32.8425          109       176     2012      08        01        214              0.199083      32.545135       0.000000       0.238177       0.245500   -9999.000000       0.088300   -9999.000000
57294     57294     henan          114.0242       32.8425          109       176     2012      08        02        215              0.194458      29.272217       0.000000       0.232386       0.217000       0.205900       0.100300       0.543000
57294     57294     henan          114.0242       32.8425          109       176     2012      08        03        216              0.190542      29.920013       0.000000       0.226179   -9999.000000       0.028400       0.101400       0.416000
57294     57294     henan          114.0242       32.8425          109       176     2012      08        04        217              0.192917      30.083099       5.596009       0.220011       0.305000   -9999.000000   -9999.000000   -9999.000000
57294     57294     henan          114.0242       32.8425          109       176     2012      08        05        218              0.195125      27.554901       0.000000       0.266370       0.279500       0.130600   -9999.000000       0.623000
57294     57294     henan          114.0242       32.8425          109       176     2012      08        06        219              0.192250      29.441315       0.607278       0.255627       0.256000       0.205300       0.120200   -9999.000000
57294     57294     henan          114.0242       32.8425          109       176     2012      08        07        220              0.186667      30.565002       0.000000       0.241894       0.217000   -9999.000000   -9999.000000       0.487000
57294     57294     henan          114.0242       32.8425          109       176     2012      08        08        221              0.183417      30.794250       0.000000       0.226382   -9999.000000       0.220100       0.111200   -9999.000000
57294     57294     henan          114.0242       32.8425          109       176     2012      08        09        222              0.254250      31.347504       4.387628       0.215817       0.290000   -9999.000000       0.122100   -9999.000000
57294     57294     henan          114.0242       32.8425          109       176     2012      08        10        223              0.290261      30.787048       1.609244       0.237170       0.281500       0.091900   -9999.000000       0.617000
57294     57294     henan          114.0242       32.8425          109       176     2012      08        11        224              0.284417      28.599274       0.000000       0.247604       0.257000       0.275000   -9999.000000   -9999.000000
57294     57294     henan          114.0242       32.8425          109       176     2012      08        12        225              0.260042      30.027649       0.000000       0.240439       0.210000       0.122600       0.100300       0.442000
57294     57294     henan          114.0242       32.8425          109       176     2012      08        13        226              0.243708      31.102051       1.058313       0.222272       0.242000       0.305300       0.102800   -9999.000000
57294     57294     henan          114.0242       32.8425          109       176     2012      08        14        227              0.243708      26.220947       6.468398       0.219747   -9999.000000   -9999.000000       0.091800   -9999.000000
57294     57294     henan          114.0242       32.8425          109       176     2012      08        15        228              0.297583      27.241791       0.582468       0.240177       0.284000   -9999.000000       0.097300       0.697000
57294     57294     henan          114.0242       32.8425          109       176     2012      08        16        229              0.271542      28.408966       0.000000       0.269034       0.262500       0.191800   -9999.000000   -9999.000000
57294     57294     henan          114.0242       32.8425          109       176     2012      08        17        230              0.255958      28.864594       0.000000       0.242859       0.258500   -9999.000000       0.099100       0.403000
57294     57294     henan          114.0242       32.8425          109       176     2012      08        18        231              0.246583      30.639618       9.588836       0.230628       0.227000       0.145400       0.086100   -9999.000000
57294     57294     henan          114.0242       32.8425          109       176     2012      08        19        232              0.233875      31.321259       1.112831       0.276595   -9999.000000   -9999.000000       0.100500       0.649000
57294     57294     henan          114.0242       32.8425          109       176     2012      08        20        233              0.293333      30.354156      59.444340       0.262804   -9999.000000       0.350100       0.183000       0.948000
57294     57294     henan          114.0242       32.8425          109       176     2012      08        21        234              0.362250      26.889191       8.456397       0.359104       0.250500       0.148400   -9999.000000   -9999.000000
57294     57294     henan          114.0242       32.8425          109       176     2012      08        22        235              0.348542      24.721619       0.000000       0.372191       0.246500   -9999.000000   -9999.000000   -9999.000000
57294     57294     henan          114.0242       32.8425          109       176     2012      08        23        236              0.330750      22.829742       0.000000       0.341562       0.206000       0.262600       0.146700   -9999.000000
57294     57294     henan          114.0242       32.8425          109       176     2012      08        24        237              0.314958      24.370850       0.000000       0.326568       0.204000       0.287800       0.171900       0.699000
57294     57294     henan          114.0242       32.8425          109       176     2012      08        25        238              0.000000      25.424316       5.209167       0.316362       0.250000       0.108800       0.150400   -9999.000000
57294     57294     henan          114.0242       32.8425          109       176     2012      08        26        239              0.365417      26.800232      32.576866       0.319433       0.302000       0.287100       0.168700       1.000000
57294     57294     henan          114.0242       32.8425          109       176     2012      08        27        240              0.367292      24.182770      16.660698       0.375625       0.250000   -9999.000000   -9999.000000       0.729000
57294     57294     henan          114.0242       32.8425          109       176     2012      08        28        241              0.361333      24.765472       0.115924       0.376521       0.277000   -9999.000000   -9999.000000   -9999.000000
57294     57294     henan          114.0242       32.8425          109       176     2012      08        29        242              0.355667      27.324066       0.000000       0.348736       0.217000       0.346200       0.128100       0.680000
57294     57294     henan          114.0242       32.8425          109       176     2012      08        30        243              0.349625      29.229553       0.000000       0.336090   -9999.000000       0.248100       0.153600   -9999.000000
57294     57294     henan          114.0242       32.8425          109       176     2012      08        31        244              0.345833      29.228119       0.148743       0.327737       0.249000       0.257800       0.135900       0.690000
57294     57294     henan          114.0242       32.8425          109       176     2012      09        01        245              0.341125      29.055756       0.836046       0.323083       0.254500   -9999.000000       0.153200       0.660000
57294     57294     henan          114.0242       32.8425          109       176     2012      09        02        246              0.333833      29.006409       1.770882       0.317351       0.241500       0.162700   -9999.000000   -9999.000000
57294     57294     henan          114.0242       32.8425          109       176     2012      09        03        247              0.320667      24.468933       0.098192       0.321698       0.204000       0.169900       0.149400       0.612000
57294     57294     henan          114.0242       32.8425          109       176     2012      09        04        248              0.308417      26.027130       0.000000       0.310269   -9999.000000       0.220800       0.130500   -9999.000000
57294     57294     henan          114.0242       32.8425          109       176     2012      09        05        249              0.297500      26.126282       0.325396       0.301917       0.243000       0.182100       0.141100       0.499000
57294     57294     henan          114.0242       32.8425          109       176     2012      09        06        250              0.291667      26.571869       0.221301       0.294341       0.243000   -9999.000000       0.138600   -9999.000000
57294     57294     henan          114.0242       32.8425          109       176     2012      09        07        251              0.304875      26.051971      51.107777       0.293425       0.217000       0.280100   -9999.000000   -9999.000000
57294     57294     henan          114.0242       32.8425          109       176     2012      09        08        252              0.368750      27.398621      25.439333       0.332286       0.322500       0.309200   -9999.000000       0.945000
57294     57294     henan          114.0242       32.8425          109       176     2012      09        09        253              0.362042      22.591187       0.582388       0.389312       0.280000   -9999.000000       0.138900   -9999.000000
57294     57294     henan          114.0242       32.8425          109       176     2012      09        10        254              0.359042      23.754669       0.000000       0.356569   -9999.000000       0.295900       0.175900       0.732000
57294     57294     henan          114.0242       32.8425          109       176     2012      09        11        255              0.367958      24.594025      41.820549       0.346176       0.215000       0.219900       0.192800   -9999.000000
57294     57294     henan          114.0242       32.8425          109       176     2012      09        12        256              0.363792      22.679688       0.105629       0.391923       0.197000       0.230200       0.173100   -9999.000000
57294     57294     henan          114.0242       32.8425          109       176     2012      09        13        257              0.354375      20.821686       0.329890       0.361291       0.202500       0.226000   -9999.000000       0.645000
57294     57294     henan          114.0242       32.8425          109       176     2012      09        14        258              0.345917      20.586700       0.000000       0.348224       0.173000   -9999.000000   -9999.000000   -9999.000000
57294     57294     henan          114.0242       32.8425          109       176     2012      09        15        259              0.339792      21.832245       0.000000       0.339410   -9999.000000       0.288100       0.139400       0.554000
57294     57294     henan          114.0242       32.8425          109       176     2012      09        16        260              0.334292      22.196106       0.000000       0.333091       0.200000       0.230300       0.157200   -9999.000000
57294     57294     henan          114.0242       32.8425          109       176     2012      09        17        261              0.326500      22.387665       0.000000       0.328437       0.181000       0.183300       0.151200       0.678000
57294     57294     henan          114.0242       32.8425          109       176     2012      09        18        262              0.319708      22.381042       0.000000       0.323544       0.195000       0.153200       0.142500       0.577000
57294     57294     henan          114.0242       32.8425          109       176     2012      09        19        263              0.314167      23.779449       0.000000       0.319186       0.172000   -9999.000000   -9999.000000   -9999.000000
57294     57294     henan          114.0242       32.8425          109       176     2012      09        20        264              0.310833      24.468384       0.351352       0.315223       0.176000       0.237200       0.140000       0.477000
57294     57294     henan          114.0242       32.8425          109       176     2012      09        21        265              0.308125      24.546722       0.000000       0.312660   -9999.000000   -9999.000000       0.143600   -9999.000000
57294     57294     henan          114.0242       32.8425          109       176     2012      09        22        266              0.303292      24.125580       0.113355       0.311418       0.197000       0.157500       0.146000       0.523000
57294     57294     henan          114.0242       32.8425          109       176     2012      09        23        267              0.299458      24.737762       0.087946       0.307614       0.183000       0.115200       0.162800   -9999.000000
57294     57294     henan          114.0242       32.8425          109       176     2012      09        24        268              0.295500      24.384613       0.000000       0.305635       0.191000   -9999.000000   -9999.000000       0.751000
57294     57294     henan          114.0242       32.8425          109       176     2012      09        25        269              0.292333      24.549561       0.148503       0.301506       0.187000       0.103700   -9999.000000       0.396000
57294     57294     henan          114.0242       32.8425          109       176     2012      09        26        270              0.290917      24.651367       0.612420       0.300202   -9999.000000       0.161400       0.093600   -9999.000000
57294     57294     henan          114.0242       32.8425          109       176     2012      09        27        271              0.288500      23.860046       1.144503       0.302161       0.209000   -9999.000000       0.110700       0.531000
57294     57294     henan          114.0242       32.8425          109       176     2012      09        28        272              0.276933      24.050537       0.000000       0.297451       0.202500   -9999.000000       0.117900   -9999.000000
57294     57294     henan          114.0242       32.8425          109       176     2012      09        29        273              0.275000      20.429016       0.138805       0.290457       0.185500   -9999.000000       0.124300       0.408000
57294     57294     henan          114.0242       32.8425          109       176     2012      09        30        274              0.271958      20.483887       0.077220       0.287209       0.182000       0.128700   -9999.000000       0.263000
57294     57294     henan          114.0242       32.8425          109       176     2012      10        01        275              0.272542      20.957123       0.000000       0.284988   -9999.000000   -9999.000000       0.087100   -9999.000000
57294     57294     henan          114.0242       32.8425          109       176     2012      10        02        276              0.272708      21.585052       0.109712       0.281512       0.146000   -9999.000000       0.070000       0.472000
57294     57294     henan          114.0242       32.8425          109       176     2012      10        03        277              0.272375      21.941742       0.000000       0.278995       0.157500   -9999.000000       0.084600   -9999.000000
57294     57294     henan          114.0242       32.8425          109       176     2012      10        04        278              0.270667      22.404602       0.089337       0.276611       0.149500       0.277500       0.094200       0.342000
57294     57294     henan          114.0242       32.8425          109       176     2012      10        05        279              0.269125      21.607025       1.500568       0.277027       0.155500       0.179100       0.089500   -9999.000000
57294     57294     henan          114.0242       32.8425          109       176     2012      10        06        280              0.268750      20.240417       1.884296       0.285067       0.140000       0.277400   -9999.000000   -9999.000000
57294     57294     henan          114.0242       32.8425          109       176     2012      10        07        281              0.269708      20.773132       1.291851       0.293049   -9999.000000   -9999.000000       0.073700       0.426000
57294     57294     henan          114.0242       32.8425          109       176     2012      10        08        282              0.269917      21.577240       0.000000       0.296140       0.156000       0.179800       0.061400   -9999.000000
57294     57294     henan          114.0242       32.8425          109       176     2012      10        09        283              0.268625      22.173889       0.000000       0.289282       0.154000   -9999.000000       0.066700       0.454000
57294     57294     henan          114.0242       32.8425          109       176     2012      10        10        284              0.266917      21.274323       0.000000       0.283174       0.145000       0.270600       0.067900   -9999.000000
57294     57294     henan          114.0242       32.8425          109       176     2012      10        11        285              0.266125      20.314514       0.148202       0.278923       0.104000       0.141400   -9999.000000   -9999.000000
57294     57294     henan          114.0242       32.8425          109       176     2012      10        12        286              0.265083      20.152924       0.065117       0.277804   -9999.000000   -9999.000000   -9999.000000       0.440000
57294     57294     henan          114.0242       32.8425          109       176     2012      10        13        287              0.265333      19.036133       0.000000       0.281035       0.121000       0.126200       0.056600   -9999.000000
57294     57294     henan          114.0242       32.8425          109       176     2012      10        14        288              0.263917      20.702118       0.000000       0.278122       0.113500       0.060700       0.065800       0.349000
57294     57294     henan          114.0242       32.8425          109       176     2012      10        15        289              0.267417      20.753906       8.226593       0.277295       0.116000   -9999.000000       0.078500   -9999.000000
57294     57294     henan          114.0242       32.8425          109       176     2012      10        16        290              0.277625      19.926422       0.159646       0.302529       0.148000       0.077300       0.085800       0.890000
57294     57294     henan          114.0242       32.8425          109       176     2012      10        17        291              0.276042      16.504669       0.000000       0.309815       0.111000   -9999.000000   -9999.000000       0.420000
57294     57294     henan          114.0242       32.8425          109       176     2012      10        18        292              0.276792      16.750885       0.000000       0.297453       0.128000   -9999.000000       0.072100   -9999.000000
57294     57294     henan          114.0242       32.8425          109       176     2012      10        19        293              0.277042      18.513977       0.000000       0.293088       0.138000       0.128400       0.064200       0.311000
57294     57294     henan          114.0242       32.8425          109       176     2012      10        20        294              0.277125      19.030060       0.000000       0.290618       0.114000   -9999.000000       0.072200   -9999.000000
57294     57294     henan          114.0242       32.8425          109       176     2012      10        21        295              0.275833      20.732880       0.326705       0.288071       0.166000       0.102300       0.077500       0.303000
57294     57294     henan          114.0242       32.8425          109       176     2012      10        22        296              0.272250      19.606110       0.727470       0.287296   -9999.000000       0.236700   -9999.000000   -9999.000000
57294     57294     henan          114.0242       32.8425          109       176     2012      10        23        297              0.271542      15.864136       0.091505       0.283597   -9999.000000   -9999.000000   -9999.000000       0.511000
57294     57294     henan          114.0242       32.8425          109       176     2012      10        24        298              0.270750      16.866302       0.498449       0.282653   -9999.000000   -9999.000000       0.057300       0.195000
57294     57294     henan          114.0242       32.8425          109       176     2012      10        25        299              0.000000      17.759369       0.668802       0.281768       0.141000   -9999.000000       0.079900   -9999.000000
57294     57294     henan          114.0242       32.8425          109       176     2012      10        26        300              0.267292      18.701965       0.309131       0.282049       0.205500       0.064700       0.081700       0.384000
57294     57294     henan          114.0242       32.8425          109       176     2012      10        27        301              0.268042      16.007843       0.000000       0.289287       0.151000   -9999.000000       0.069700   -9999.000000
57294     57294     henan          114.0242       32.8425          109       176     2012      10        28        302              0.000000      18.439972       0.000000       0.285148   -9999.000000   -9999.000000   -9999.000000       0.317000
57294     57294     henan          114.0242       32.8425          109       176     2012      10        29        303              0.265625      18.866089       0.446866       0.282179       0.200000       0.047600   -9999.000000       0.439000
57294     57294     henan          114.0242       32.8425          109       176     2012      10        30        304              0.264125      15.771057       0.000000       0.286783       0.150000   -9999.000000       0.054900   -9999.000000
57294     57294     henan          114.0242       32.8425          109       176     2012      10        31        305              0.262250      14.759460       0.000000       0.283275       0.148000   -9999.000000       0.075900       0.213000
57294     57294     henan          114.0242       32.8425          109       176     2012      11        01        306              0.261708      14.354645       0.259913       0.279695       0.148500   -9999.000000       0.073900   -9999.000000
57294     57294     henan          114.0242       32.8425          109       176     2012      11        02        307              0.260417      14.969513       0.153442       0.279881       0.141000   -9999.000000       0.076600       0.271000
57294     57294     henan          114.0242       32.8425          109       176     2012      11        03        308              0.274958      15.891022      13.113004       0.278590   -9999.000000       0.208700   -9999.000000   -9999.000000
57294     57294     henan          114.0242       32.8425          109       176     2012      11        04        309              0.276292      10.651245       0.000000       0.333192   -9999.000000   -9999.000000       0.089000   -9999.000000
57294     57294     henan          114.0242       32.8425          109       176     2012      11        05        310              0.274750      10.692688       0.000000       0.309768       0.158000       0.182400       0.091600       0.277000
57294     57294     henan          114.0242       32.8425          109       176     2012      11        06        311              0.274375      10.105560       0.052916       0.303112       0.164500       0.135500       0.094000   -9999.000000
57294     57294     henan          114.0242       32.8425          109       176     2012      11        07        312              0.276000      11.569153       4.402993       0.300271       0.159000   -9999.000000       0.090000       0.289000
57294     57294     henan          114.0242       32.8425          109       176     2012      11        08        313              0.278250      12.662323       0.000000       0.308987   -9999.000000       0.148700   -9999.000000   -9999.000000
57294     57294     henan          114.0242       32.8425          109       176     2012      11        09        314              0.290250      11.168579       8.522552       0.313679       0.268000       0.289000   -9999.000000   -9999.000000
57294     57294     henan          114.0242       32.8425          109       176     2012      11        10        315              0.310250      11.051422       0.245106       0.330842       0.191000       0.215000       0.089300       0.642000
57294     57294     henan          114.0242       32.8425          109       176     2012      11        11        316              0.303208       9.779907       0.000000       0.326230       0.151000   -9999.000000       0.103200   -9999.000000
57294     57294     henan          114.0242       32.8425          109       176     2012      11        12        317              0.300000       9.904388       0.051789       0.316699       0.147000   -9999.000000       0.083300       0.338000
57294     57294     henan          114.0242       32.8425          109       176     2012      11        13        318              0.000000      11.244049       0.000000       0.313674       0.137000       0.126300       0.094700   -9999.000000
57294     57294     henan          114.0242       32.8425          109       176     2012      11        14        319              0.294792      11.530029       0.000000       0.310125       0.153000   -9999.000000   -9999.000000       0.422000
57294     57294     henan          114.0242       32.8425          109       176     2012      11        15        320              0.293292      10.198700       0.875430       0.307247       0.166000       0.193800   -9999.000000       0.310000
57294     57294     henan          114.0242       32.8425          109       176     2012      11        16        321              0.290708       9.412689       0.000000       0.308373       0.117000       0.094200       0.067900   -9999.000000
57294     57294     henan          114.0242       32.8425          109       176     2012      11        17        322              0.000000       9.791382       0.000000       0.307264       0.138500   -9999.000000       0.082800       0.056000
57294     57294     henan          114.0242       32.8425          109       176     2012      11        18        323              0.288875      11.490631       0.000000       0.305294       0.138000       0.094900       0.083600   -9999.000000
57294     57294     henan          114.0242       32.8425          109       176     2012      11        19        324              0.288042      11.678589       0.047563       0.304138   -9999.000000       0.133900       0.070400       0.208000
57294     57294     henan          114.0242       32.8425          109       176     2012      11        20        325              0.287000      11.811615       4.246463       0.303122       0.206000   -9999.000000   -9999.000000   -9999.000000
57294     57294     henan          114.0242       32.8425          109       176     2012      11        21        326              0.287000       9.656982       0.000000       0.314491       0.168000       0.227600       0.072400       0.706000
57294     57294     henan          114.0242       32.8425          109       176     2012      11        22        327              0.286250      10.256775       0.000000       0.315780       0.161000       0.220500       0.066100       0.308000
57294     57294     henan          114.0242       32.8425          109       176     2012      11        23        328              0.283750       8.968292       0.000000       0.312340       0.144000   -9999.000000       0.067700   -9999.000000
57294     57294     henan          114.0242       32.8425          109       176     2012      11        24        329              0.283583       7.208466       3.922382       0.308848   -9999.000000       0.121100       0.077100       0.233000
57294     57294     henan          114.0242       32.8425          109       176     2012      11        25        330              0.293250       8.225311       4.637114       0.313154   -9999.000000   -9999.000000   -9999.000000   -9999.000000
57294     57294     henan          114.0242       32.8425          109       176     2012      11        26        331              0.295208       6.404205       0.000000       0.335307       0.133000       0.114800   -9999.000000       0.201000
57294     57294     henan          114.0242       32.8425          109       176     2012      11        27        332              0.294250       7.313934       0.000000       0.320711       0.146000       0.280200       0.075600   -9999.000000
57294     57294     henan          114.0242       32.8425          109       176     2012      11        28        333              0.292000       9.354126       0.000000       0.316729       0.145000   -9999.000000       0.114300   -9999.000000
57294     57294     henan          114.0242       32.8425          109       176     2012      11        29        334              0.291208       7.311554       1.556452       0.313809       0.144000       0.187100       0.096800       0.467000
57294     57294     henan          114.0242       32.8425          109       176     2012      11        30        335              0.291083       6.761902       0.048960       0.317301   -9999.000000   -9999.000000       0.129100   -9999.000000
57294     57294     henan          114.0242       32.8425          109       176     2012      12        01        336              0.287125       7.190521       0.502243       0.315780   -9999.000000       0.082800   -9999.000000       0.292000
57294     57294     henan          114.0242       32.8425          109       176     2012      12        02        337              0.287375       2.902161       0.000000       0.315706       0.163000       0.318300       0.114300   -9999.000000
57294     57294     henan          114.0242       32.8425          109       176     2012      12        03        338              0.287167       5.094452       0.057725       0.314644       0.137000       0.052500       0.125500   -9999.000000
57294     57294     henan          114.0242       32.8425          109       176     2012      12        04        339              0.286000       5.853424       0.000000       0.311194       0.154000       0.025700       0.142200       0.182000
57294     57294     henan          114.0242       32.8425          109       176     2012      12        05        340              0.284792       6.086700       0.000000       0.311089   -9999.000000   -9999.000000       0.155400   -9999.000000
57294     57294     henan          114.0242       32.8425          109       176     2012      12        06        341              0.284167       6.079346       0.102946       0.308396   -9999.000000       0.107500   -9999.000000       0.178000
57294     57294     henan          114.0242       32.8425          109       176     2012      12        07        342              0.283542       6.556061       0.000000       0.308641       0.118000       0.120900   -9999.000000   -9999.000000
57294     57294     henan          114.0242       32.8425          109       176     2012      12        08        343              0.281833       6.558716       0.000000       0.306860       0.145000   -9999.000000       0.118400   -9999.000000
57294     57294     henan          114.0242       32.8425          109       176     2012      12        09        344              0.280833       4.854950       0.000000       0.304940       0.141000       0.155000       0.142200       0.116000
57294     57294     henan          114.0242       32.8425          109       176     2012      12        10        345              0.279583       3.965454       0.000000       0.302008       0.150000   -9999.000000       0.090200   -9999.000000
57294     57294     henan          114.0242       32.8425          109       176     2012      12        11        346              0.278083       3.150146       0.141273       0.289249   -9999.000000       0.100000       0.110000       0.025000
57294     57294     henan          114.0242       32.8425          109       176     2012      12        12        347              0.278542       2.661346       0.452542       0.282029       0.127000       0.043300   -9999.000000   -9999.000000
57294     57294     henan          114.0242       32.8425          109       176     2012      12        13        348              0.322792       3.371002      19.433807       0.298552   -9999.000000   -9999.000000   -9999.000000       0.940000
57294     57294     henan          114.0242       32.8425          109       176     2012      12        14        349              0.327167       2.729218       0.064129       0.346490   -9999.000000       0.213500       0.085600       0.522000
57294     57294     henan          114.0242       32.8425          109       176     2012      12        15        350              0.000000       2.836548       0.042194       0.346131   -9999.000000   -9999.000000       0.134100   -9999.000000
57294     57294     henan          114.0242       32.8425          109       176     2012      12        16        351              0.321417       2.477661       0.000000       0.332570   -9999.000000   -9999.000000       0.132800       0.499000
57294     57294     henan          114.0242       32.8425          109       176     2012      12        17        352              0.318250       3.344025       1.441632       0.329825   -9999.000000       0.251800       0.132900   -9999.000000
57294     57294     henan          114.0242       32.8425          109       176     2012      12        18        353              0.313000       2.564697       0.000000       0.321929       0.145000   -9999.000000   -9999.000000       0.162000
57294     57294     henan          114.0242       32.8425          109       176     2012      12        19        354              0.308167       2.558990       2.823066       0.300987       0.137000       0.108700       0.185200   -9999.000000
57294     57294     henan          114.0242       32.8425          109       176     2012      12        20        355              0.000000       2.557892       0.028248       0.307980   -9999.000000       0.137600       0.146300       0.316000
57294     57294     henan          114.0242       32.8425          109       176     2012      12        21        356              0.316333       1.078400       2.096782       0.286514   -9999.000000       0.132100       0.152600       0.091000
57294     57294     henan          114.0242       32.8425          109       176     2012      12        22        357              0.312417       2.142548       0.000000       0.300356   -9999.000000       0.078000       0.164000   -9999.000000
57294     57294     henan          114.0242       32.8425          109       176     2012      12        23        358              0.303958       1.958710       0.000000       0.291186   -9999.000000   -9999.000000   -9999.000000       0.013000
57294     57294     henan          114.0242       32.8425          109       176     2012      12        24        359              0.298476       0.512634       0.000000       0.246818       0.122000   -9999.000000   -9999.000000   -9999.000000
57294     57294     henan          114.0242       32.8425          109       176     2012      12        25        360              0.299000       1.664520       0.000000       0.275537   -9999.000000       0.075400       0.128000       0.039000
57294     57294     henan          114.0242       32.8425          109       176     2012      12        26        361              0.000000       0.487213       0.068206       0.253824   -9999.000000   -9999.000000       0.176600       0.062000
57294     57294     henan          114.0242       32.8425          109       176     2012      12        27        362              0.303000      -0.641724       1.741183       0.198382   -9999.000000   -9999.000000       0.188100   -9999.000000
57294     57294     henan          114.0242       32.8425          109       176     2012      12        28        363              0.306000      -0.157990       1.486539       0.212974   -9999.000000   -9999.000000       0.209200       0.287000
57294     57294     henan          114.0242       32.8425          109       176     2012      12        29        364              0.000000       0.380737       1.604157       0.235398   -9999.000000   -9999.000000   -9999.000000   -9999.000000
57294     57294     henan          114.0242       32.8425          109       176     2012      12        30        365              0.000000      -0.614441       0.324998       0.215682   -9999.000000       0.107500   -9999.000000       0.063000
57294     57294     henan          114.0242       32.8425          109       176     2012      12        31        366              0.308800       0.239166       0.697164       0.233986       0.125000   -9999.000000       0.123500   -9999.000000
