# Supplementary material for: Research on Fusing Multisatellite Soil Moisture Data Based on Bayesian Model Averaging
Source: Hindawi journal article supplement (doi:10.1155/2018/9310838), 2018-06-25
Supplement: f1 [file 9310838.f1.zip › 2012_sm00-10cm_daily_ZDB_ZHY_57298_366days_allin.txt]

57298     57298     henan          114.5656       32.2244          111       178     2012      01        01        001              0.000000   -9999.000000       0.000000   -9999.000000   -9999.000000   -9999.000000       0.154400   -9999.000000
57298     57298     henan          114.5656       32.2244          111       178     2012      01        02        002              0.317000       0.817444       0.000000       0.291745   -9999.000000       0.271600       0.204800   -9999.000000
57298     57298     henan          114.5656       32.2244          111       178     2012      01        03        003              0.000000       1.590698       0.000000       0.320596   -9999.000000   -9999.000000   -9999.000000       0.214000
57298     57298     henan          114.5656       32.2244          111       178     2012      01        04        004              0.310125       1.264130       0.000000       0.294158   -9999.000000   -9999.000000   -9999.000000   -9999.000000
57298     57298     henan          114.5656       32.2244          111       178     2012      01        05        005              0.308417       0.954254       0.000000       0.276942   -9999.000000       0.238500       0.126100       0.144000
57298     57298     henan          114.5656       32.2244          111       178     2012      01        06        006              0.307708       1.455505       0.000000       0.284711   -9999.000000   -9999.000000       0.160600       0.213000
57298     57298     henan          114.5656       32.2244          111       178     2012      01        07        007              0.306000       2.198456       0.000000       0.295537   -9999.000000       0.187100       0.199700   -9999.000000
57298     57298     henan          114.5656       32.2244          111       178     2012      01        08        008              0.000000       2.086731       0.000000       0.312172   -9999.000000       0.117500       0.204800       0.102000
57298     57298     henan          114.5656       32.2244          111       178     2012      01        09        009              0.305250       2.619965       0.000000       0.315747       0.104000   -9999.000000   -9999.000000   -9999.000000
57298     57298     henan          114.5656       32.2244          111       178     2012      01        10        010              0.305000       3.903931       0.000000       0.324290   -9999.000000       0.138600       0.105100       0.167000
57298     57298     henan          114.5656       32.2244          111       178     2012      01        11        011              0.303667       2.119904       0.000000       0.317230   -9999.000000       0.175800       0.101800   -9999.000000
57298     57298     henan          114.5656       32.2244          111       178     2012      01        12        012              0.303000       2.235626       0.000000       0.309712   -9999.000000   -9999.000000       0.099300       0.264000
57298     57298     henan          114.5656       32.2244          111       178     2012      01        13        013              0.304083       1.164581       0.000000       0.305229   -9999.000000       0.140000       0.132300       0.144000
57298     57298     henan          114.5656       32.2244          111       178     2012      01        14        014              0.305750       1.611176       0.000000       0.315193   -9999.000000   -9999.000000   -9999.000000   -9999.000000
57298     57298     henan          114.5656       32.2244          111       178     2012      01        15        015              0.305583       1.787140       0.000000       0.319614   -9999.000000   -9999.000000   -9999.000000       0.297000
57298     57298     henan          114.5656       32.2244          111       178     2012      01        16        016              0.305000       2.995819       0.483404       0.329414       0.122000       0.116400       0.086200   -9999.000000
57298     57298     henan          114.5656       32.2244          111       178     2012      01        17        017              0.000000       3.285187       4.765280       0.334224   -9999.000000   -9999.000000       0.097800       0.722000
57298     57298     henan          114.5656       32.2244          111       178     2012      01        18        018              0.315667       2.916534       0.771091       0.345917   -9999.000000       0.189900       0.112900   -9999.000000
57298     57298     henan          114.5656       32.2244          111       178     2012      01        19        019              0.316292       2.670990       0.980818       0.347096   -9999.000000   -9999.000000       0.115300   -9999.000000
57298     57298     henan          114.5656       32.2244          111       178     2012      01        20        020              0.317000       2.899170       1.128261       0.345598   -9999.000000       0.269800   -9999.000000       0.663000
57298     57298     henan          114.5656       32.2244          111       178     2012      01        21        021              0.315750       3.099579       0.387510       0.335840   -9999.000000       0.309800   -9999.000000   -9999.000000
57298     57298     henan          114.5656       32.2244          111       178     2012      01        22        022              0.310792       0.247650       0.255423       0.276320   -9999.000000   -9999.000000       0.050100       0.124000
57298     57298     henan          114.5656       32.2244          111       178     2012      01        23        023              0.308042      -0.637451       0.000000       0.239482   -9999.000000       0.372700       0.116700   -9999.000000
57298     57298     henan          114.5656       32.2244          111       178     2012      01        24        024              0.305917       0.514984       0.000000       0.253892   -9999.000000   -9999.000000   -9999.000000   -9999.000000
57298     57298     henan          114.5656       32.2244          111       178     2012      01        25        025              0.301250       0.327179       0.000000       0.256373       0.124000   -9999.000000       0.140500       0.145000
57298     57298     henan          114.5656       32.2244          111       178     2012      01        26        026              0.301750       1.819916       0.000000       0.285040   -9999.000000       0.049800   -9999.000000   -9999.000000
57298     57298     henan          114.5656       32.2244          111       178     2012      01        27        027              0.302000       3.218292       0.000000       0.308183   -9999.000000   -9999.000000       0.128800       0.304000
57298     57298     henan          114.5656       32.2244          111       178     2012      01        28        028              0.302292       3.059814       0.000000       0.323447       0.125000       0.249900       0.133600   -9999.000000
57298     57298     henan          114.5656       32.2244          111       178     2012      01        29        029              0.304875       3.983276       0.748162       0.331240   -9999.000000   -9999.000000       0.142500   -9999.000000
57298     57298     henan          114.5656       32.2244          111       178     2012      01        30        030              0.305833       2.985687       0.121167       0.329285   -9999.000000   -9999.000000       0.174600       0.369000
57298     57298     henan          114.5656       32.2244          111       178     2012      01        31        031              0.302667       2.905182       0.536123       0.321741   -9999.000000       0.199100   -9999.000000   -9999.000000
57298     57298     henan          114.5656       32.2244          111       178     2012      02        01        032              0.301667       5.290894       0.000000       0.329679   -9999.000000   -9999.000000   -9999.000000       0.158000
57298     57298     henan          114.5656       32.2244          111       178     2012      02        02        033              0.297292       1.357941       0.000000       0.300708   -9999.000000       0.404200       0.099900   -9999.000000
57298     57298     henan          114.5656       32.2244          111       178     2012      02        03        034              0.294208       1.866394       0.000000       0.286153       0.117000       0.206200       0.131200       0.001000
57298     57298     henan          114.5656       32.2244          111       178     2012      02        04        035              0.295042       3.548340       0.000000       0.309084   -9999.000000   -9999.000000       0.152800       0.334000
57298     57298     henan          114.5656       32.2244          111       178     2012      02        05        036              0.296167       2.005341       1.089391       0.312169   -9999.000000       0.284300       0.168800   -9999.000000
57298     57298     henan          114.5656       32.2244          111       178     2012      02        06        037              0.297375       5.767761       0.000000       0.329981   -9999.000000   -9999.000000   -9999.000000       0.205000
57298     57298     henan          114.5656       32.2244          111       178     2012      02        07        038              0.293833       5.483734       0.000000       0.321763   -9999.000000       0.285800   -9999.000000   -9999.000000
57298     57298     henan          114.5656       32.2244          111       178     2012      02        08        039              0.290208       2.482788       0.000000       0.290182   -9999.000000       0.194800       0.126300       0.012000
57298     57298     henan          114.5656       32.2244          111       178     2012      02        09        040              0.290667       2.662140       0.000000       0.286128   -9999.000000   -9999.000000       0.155500   -9999.000000
57298     57298     henan          114.5656       32.2244          111       178     2012      02        10        041              0.290000       1.130249       0.166562       0.283659   -9999.000000       0.399900       0.177700       0.286000
57298     57298     henan          114.5656       32.2244          111       178     2012      02        11        042              0.287250       3.622498       0.000000       0.297008   -9999.000000   -9999.000000       0.169800       0.058000
57298     57298     henan          114.5656       32.2244          111       178     2012      02        12        043              0.287000       4.889893       0.000000       0.313797   -9999.000000   -9999.000000   -9999.000000   -9999.000000
57298     57298     henan          114.5656       32.2244          111       178     2012      02        13        044              0.287000       2.236877       0.000000       0.308328   -9999.000000       0.071900   -9999.000000       0.001000
57298     57298     henan          114.5656       32.2244          111       178     2012      02        14        045              0.292042       1.860260       2.247806       0.307379       0.132000   -9999.000000       0.158600   -9999.000000
57298     57298     henan          114.5656       32.2244          111       178     2012      02        15        046              0.309625       3.504852       2.169441       0.328820   -9999.000000   -9999.000000       0.151700       0.753000
57298     57298     henan          114.5656       32.2244          111       178     2012      02        16        047              0.311833       3.270905       0.393238       0.337548   -9999.000000   -9999.000000       0.184100   -9999.000000
57298     57298     henan          114.5656       32.2244          111       178     2012      02        17        048              0.308792       4.983978       0.000000       0.333005   -9999.000000   -9999.000000   -9999.000000   -9999.000000
57298     57298     henan          114.5656       32.2244          111       178     2012      02        18        049              0.305083       4.506927       0.000000       0.317483       0.114000       0.188400   -9999.000000       0.218000
57298     57298     henan          114.5656       32.2244          111       178     2012      02        19        050              0.301708       4.951202       0.000000       0.314200       0.116000   -9999.000000       0.123300   -9999.000000
57298     57298     henan          114.5656       32.2244          111       178     2012      02        20        051              0.299250       6.615265       0.000000       0.322503       0.142000   -9999.000000       0.132300       0.230000
57298     57298     henan          114.5656       32.2244          111       178     2012      02        21        052              0.297130       5.422272       1.646409       0.325134   -9999.000000       0.125000   -9999.000000   -9999.000000
57298     57298     henan          114.5656       32.2244          111       178     2012      02        22        053              0.296000       9.680359       0.000000       0.322662       0.107000   -9999.000000       0.158600   -9999.000000
57298     57298     henan          114.5656       32.2244          111       178     2012      02        23        054              0.294042       8.188446       2.008904       0.323232       0.134000       0.095900   -9999.000000       0.271000
57298     57298     henan          114.5656       32.2244          111       178     2012      02        24        055              0.292000       5.444122       0.533180       0.330560       0.111000   -9999.000000   -9999.000000   -9999.000000
57298     57298     henan          114.5656       32.2244          111       178     2012      02        25        056              0.291458       4.192108       0.048524       0.327812   -9999.000000       0.362000       0.110100       0.167000
57298     57298     henan          114.5656       32.2244          111       178     2012      02        26        057              0.288333       4.242493       0.000000       0.325478   -9999.000000       0.151400       0.124200   -9999.000000
57298     57298     henan          114.5656       32.2244          111       178     2012      02        27        058              0.285792       5.650818       0.000000       0.318748   -9999.000000       0.257100   -9999.000000   -9999.000000
57298     57298     henan          114.5656       32.2244          111       178     2012      02        28        059              0.283000       5.173706       0.000000       0.318035       0.105000       0.265700       0.140000       0.175000
57298     57298     henan          114.5656       32.2244          111       178     2012      02        29        060              0.000000   -9999.000000       0.000000   -9999.000000       0.119500   -9999.000000   -9999.000000   -9999.000000
57298     57298     henan          114.5656       32.2244          111       178     2012      03        01        061              0.282000       7.186249       0.295030       0.318545       0.153000       0.069100       0.117100       0.108000
57298     57298     henan          114.5656       32.2244          111       178     2012      03        02        062              0.281417       5.295868       1.578421       0.321149   -9999.000000       0.131300       0.131800   -9999.000000
57298     57298     henan          114.5656       32.2244          111       178     2012      03        03        063              0.281000       5.381805       0.325920       0.323793       0.147000   -9999.000000       0.127700       0.047000
57298     57298     henan          114.5656       32.2244          111       178     2012      03        04        064              0.281750       4.050232       0.259189       0.323151   -9999.000000       0.049100       0.163200       0.284000
57298     57298     henan          114.5656       32.2244          111       178     2012      03        05        065              0.281458       3.127869       0.000000       0.322346       0.138000   -9999.000000   -9999.000000   -9999.000000
57298     57298     henan          114.5656       32.2244          111       178     2012      03        06        066              0.279083       5.895844       0.000000       0.322308       0.140500       0.198700   -9999.000000       0.031000
57298     57298     henan          114.5656       32.2244          111       178     2012      03        07        067              0.000000       8.381775       0.603172       0.318527       0.145000       0.180700       0.112000   -9999.000000
57298     57298     henan          114.5656       32.2244          111       178     2012      03        08        068              0.275292       8.199951       0.000000       0.319283   -9999.000000   -9999.000000       0.139200       0.019000
57298     57298     henan          114.5656       32.2244          111       178     2012      03        09        069              0.272167       6.747345       0.000000       0.318664   -9999.000000       0.111200       0.144900   -9999.000000
57298     57298     henan          114.5656       32.2244          111       178     2012      03        10        070              0.269130       7.816467       0.000000       0.315382       0.109000       0.090200       0.151000       0.025000
57298     57298     henan          114.5656       32.2244          111       178     2012      03        11        071              0.266583      10.673035       0.000000       0.311557       0.141000   -9999.000000   -9999.000000   -9999.000000
57298     57298     henan          114.5656       32.2244          111       178     2012      03        12        072              0.264167       7.106934       0.000000       0.309789       0.146000   -9999.000000   -9999.000000   -9999.000000
57298     57298     henan          114.5656       32.2244          111       178     2012      03        13        073              0.261583       9.171783       0.000000       0.308478   -9999.000000   -9999.000000       0.125500       0.064000
57298     57298     henan          114.5656       32.2244          111       178     2012      03        14        074              0.258792      12.819580       1.975203       0.304699       0.142000       0.138900       0.135600   -9999.000000
57298     57298     henan          114.5656       32.2244          111       178     2012      03        15        075              0.266958      14.454498       6.870914       0.304337       0.190500       0.112500       0.207100       0.592000
57298     57298     henan          114.5656       32.2244          111       178     2012      03        16        076              0.269083       8.852203       0.752829       0.340391       0.164000       0.237800   -9999.000000   -9999.000000
57298     57298     henan          114.5656       32.2244          111       178     2012      03        17        077              0.267500      10.836029       0.000000       0.327513       0.163000       0.152700   -9999.000000   -9999.000000
57298     57298     henan          114.5656       32.2244          111       178     2012      03        18        078              0.266417      12.529266       1.998392       0.321310   -9999.000000   -9999.000000       0.155500       0.110000
57298     57298     henan          114.5656       32.2244          111       178     2012      03        19        079              0.276625      10.984039       6.136332       0.321812   -9999.000000   -9999.000000       0.245100   -9999.000000
57298     57298     henan          114.5656       32.2244          111       178     2012      03        20        080              0.281125       4.581268       0.417137       0.344558       0.152000       0.226000       0.221200       0.380000
57298     57298     henan          114.5656       32.2244          111       178     2012      03        21        081              0.304083       6.716125      34.769112       0.336492       0.209000   -9999.000000       0.268900   -9999.000000
57298     57298     henan          114.5656       32.2244          111       178     2012      03        22        082              0.344625       7.444092      12.100592       0.374374   -9999.000000   -9999.000000   -9999.000000   -9999.000000
57298     57298     henan          114.5656       32.2244          111       178     2012      03        23        083              0.334708       6.094604       0.073802       0.393626   -9999.000000   -9999.000000   -9999.000000       0.427000
57298     57298     henan          114.5656       32.2244          111       178     2012      03        24        084              0.328083      10.178192       0.000000       0.368648   -9999.000000       0.205400   -9999.000000   -9999.000000
57298     57298     henan          114.5656       32.2244          111       178     2012      03        25        085              0.000000      13.617645       0.000000       0.357671   -9999.000000       0.293000       0.216600       0.186000
57298     57298     henan          114.5656       32.2244          111       178     2012      03        26        086              0.312208      15.727875       0.000000       0.350026       0.185000   -9999.000000       0.285300   -9999.000000
57298     57298     henan          114.5656       32.2244          111       178     2012      03        27        087              0.304167      17.385315       0.000000       0.343357       0.173000       0.215900       0.285800   -9999.000000
57298     57298     henan          114.5656       32.2244          111       178     2012      03        28        088              0.295167      18.322937       0.017959       0.338650       0.171000       0.344900   -9999.000000       0.213000
57298     57298     henan          114.5656       32.2244          111       178     2012      03        29        089              0.291458      19.293549       0.604337       0.333462   -9999.000000       0.267900       0.240200   -9999.000000
57298     57298     henan          114.5656       32.2244          111       178     2012      03        30        090              0.294500      16.721771       4.960118       0.335821   -9999.000000       0.213600       0.235000       0.431000
57298     57298     henan          114.5656       32.2244          111       178     2012      03        31        091              0.290000      13.673126       0.000000       0.350574       0.173000   -9999.000000       0.224500   -9999.000000
57298     57298     henan          114.5656       32.2244          111       178     2012      04        01        092              0.278792      17.007324       0.000000       0.336701       0.202000       0.343000       0.255300       0.001000
57298     57298     henan          114.5656       32.2244          111       178     2012      04        02        093              0.270583      18.721313       0.000000       0.328899       0.195000       0.263000   -9999.000000       0.088000
57298     57298     henan          114.5656       32.2244          111       178     2012      04        03        094              0.267125      14.192841       0.000000       0.327189   -9999.000000       0.105000   -9999.000000   -9999.000000
57298     57298     henan          114.5656       32.2244          111       178     2012      04        04        095              0.263042      16.308167       0.000000       0.322090       0.186000   -9999.000000       0.234700   -9999.000000
57298     57298     henan          114.5656       32.2244          111       178     2012      04        05        096              0.259667      16.445465       0.000000       0.319478       0.178500   -9999.000000       0.236000   -9999.000000
57298     57298     henan          114.5656       32.2244          111       178     2012      04        06        097              0.255042      17.984955       0.000000       0.315161       0.172500       0.063800       0.242400   -9999.000000
57298     57298     henan          114.5656       32.2244          111       178     2012      04        07        098              0.250917      19.013611       0.000000       0.310145       0.172000       0.102100       0.266600   -9999.000000
57298     57298     henan          114.5656       32.2244          111       178     2012      04        08        099              0.246417      19.601532       0.000000       0.306212   -9999.000000   -9999.000000   -9999.000000       0.071000
57298     57298     henan          114.5656       32.2244          111       178     2012      04        09        100              0.245708      20.663177       0.326599       0.301269       0.174000   -9999.000000   -9999.000000   -9999.000000
57298     57298     henan          114.5656       32.2244          111       178     2012      04        10        101              0.245500      18.705597       0.000000       0.304809       0.169000   -9999.000000       0.226900   -9999.000000
57298     57298     henan          114.5656       32.2244          111       178     2012      04        11        102              0.244000      20.314087       0.541159       0.303091       0.202500   -9999.000000       0.246800   -9999.000000
57298     57298     henan          114.5656       32.2244          111       178     2012      04        12        103              0.243000      20.452728       0.664265       0.299914       0.221000   -9999.000000       0.291100   -9999.000000
57298     57298     henan          114.5656       32.2244          111       178     2012      04        13        104              0.242917      14.169586       0.000000       0.305605       0.200000   -9999.000000       0.283500       0.100000
57298     57298     henan          114.5656       32.2244          111       178     2012      04        14        105              0.241333      18.894073       0.043259       0.298216       0.191000   -9999.000000   -9999.000000   -9999.000000
57298     57298     henan          114.5656       32.2244          111       178     2012      04        15        106              0.238792      15.658112       0.000000       0.299667       0.202000   -9999.000000       0.241300   -9999.000000
57298     57298     henan          114.5656       32.2244          111       178     2012      04        16        107              0.235792      18.856781       0.000000       0.294683       0.188000   -9999.000000       0.263100       0.018000
57298     57298     henan          114.5656       32.2244          111       178     2012      04        17        108              0.233125      20.394867       0.000000       0.289813       0.199000   -9999.000000       0.282900   -9999.000000
57298     57298     henan          114.5656       32.2244          111       178     2012      04        18        109              0.232625      19.995209       0.000000       0.287381       0.195000   -9999.000000   -9999.000000       0.257000
57298     57298     henan          114.5656       32.2244          111       178     2012      04        19        110              0.232250      18.275452       0.000000       0.290536   -9999.000000       0.171100   -9999.000000   -9999.000000
57298     57298     henan          114.5656       32.2244          111       178     2012      04        20        111              0.230500      22.280182       0.174245       0.282224       0.212000   -9999.000000   -9999.000000   -9999.000000
57298     57298     henan          114.5656       32.2244          111       178     2012      04        21        112              0.228667      16.752869       0.000000       0.287289       0.196500   -9999.000000       0.230100       0.110000
57298     57298     henan          114.5656       32.2244          111       178     2012      04        22        113              0.224417      21.740204       0.000000       0.279273       0.193500       0.050600       0.254500   -9999.000000
57298     57298     henan          114.5656       32.2244          111       178     2012      04        23        114              0.220750      24.449707       4.649024       0.266791       0.196000   -9999.000000       0.270300       0.351000
57298     57298     henan          114.5656       32.2244          111       178     2012      04        24        115              0.222625      25.865082       1.444141       0.273448   -9999.000000       0.132000       0.334900   -9999.000000
57298     57298     henan          114.5656       32.2244          111       178     2012      04        25        116              0.000000      20.949585       0.528841       0.294787       0.229000   -9999.000000   -9999.000000   -9999.000000
57298     57298     henan          114.5656       32.2244          111       178     2012      04        26        117              0.218958      19.528076       0.000000       0.282075       0.195000   -9999.000000   -9999.000000       0.056000
57298     57298     henan          114.5656       32.2244          111       178     2012      04        27        118              0.214750      22.349457       0.000000       0.266677       0.187000       0.231600   -9999.000000   -9999.000000
57298     57298     henan          114.5656       32.2244          111       178     2012      04        28        119              0.213522      25.275879       5.176952       0.254160       0.179000   -9999.000000       0.251900       0.033000
57298     57298     henan          114.5656       32.2244          111       178     2012      04        29        120              0.211833      24.996368       0.000000       0.272742   -9999.000000       0.167500       0.282100   -9999.000000
57298     57298     henan          114.5656       32.2244          111       178     2012      04        30        121              0.211208      22.030182       2.212988       0.282578       0.225000   -9999.000000       0.289500       0.448000
57298     57298     henan          114.5656       32.2244          111       178     2012      05        01        122              0.215000      20.547638       0.180855       0.291629       0.192500   -9999.000000   -9999.000000       0.310000
57298     57298     henan          114.5656       32.2244          111       178     2012      05        02        123              0.217750      19.935455       0.000000       0.292356       0.201000       0.136200       0.235600   -9999.000000
57298     57298     henan          114.5656       32.2244          111       178     2012      05        03        124              0.216542      23.597534       0.516224       0.279839       0.198500       0.210100       0.236400       0.064000
57298     57298     henan          114.5656       32.2244          111       178     2012      05        04        125              0.217792      23.991089       0.000000       0.274385       0.185000   -9999.000000       0.236900   -9999.000000
57298     57298     henan          114.5656       32.2244          111       178     2012      05        05        126              0.217200      26.167023       0.000000       0.263273   -9999.000000   -9999.000000       0.243200       0.104000
57298     57298     henan          114.5656       32.2244          111       178     2012      05        06        127              0.215292      27.924774       0.000000       0.248002       0.194000   -9999.000000   -9999.000000   -9999.000000
57298     57298     henan          114.5656       32.2244          111       178     2012      05        07        128              0.242750      29.497498      12.986185       0.234297   -9999.000000       0.356400   -9999.000000       0.070000
57298     57298     henan          114.5656       32.2244          111       178     2012      05        08        129              0.256875      24.116730      18.809000       0.315689       0.236500       0.154100       0.224200       0.588000
57298     57298     henan          114.5656       32.2244          111       178     2012      05        09        130              0.253125      24.535492       1.464261       0.303258       0.208000   -9999.000000       0.218200   -9999.000000
57298     57298     henan          114.5656       32.2244          111       178     2012      05        10        131              0.249375      26.709625       0.000000       0.285541   -9999.000000       0.159800       0.257500       0.170000
57298     57298     henan          114.5656       32.2244          111       178     2012      05        11        132              0.248083      26.858093       0.000000       0.269249       0.148000   -9999.000000       0.242600   -9999.000000
57298     57298     henan          114.5656       32.2244          111       178     2012      05        12        133              0.245958      28.168243       0.505652       0.258561       0.168500       0.175800   -9999.000000       0.332000
57298     57298     henan          114.5656       32.2244          111       178     2012      05        13        134              0.246083      22.289459       2.834722       0.263012       0.142000   -9999.000000   -9999.000000   -9999.000000
57298     57298     henan          114.5656       32.2244          111       178     2012      05        14        135              0.252167      23.848328       0.000000       0.271523       0.154000   -9999.000000       0.171600   -9999.000000
57298     57298     henan          114.5656       32.2244          111       178     2012      05        15        136              0.251125      22.110809       0.000000       0.276513   -9999.000000       0.147300       0.190800       0.209000
57298     57298     henan          114.5656       32.2244          111       178     2012      05        16        137              0.248917      25.484070       0.000000       0.258468       0.167000   -9999.000000       0.216200   -9999.000000
57298     57298     henan          114.5656       32.2244          111       178     2012      05        17        138              0.246696      27.892670       0.000000       0.241368       0.144500   -9999.000000       0.226400       0.136000
57298     57298     henan          114.5656       32.2244          111       178     2012      05        18        139              0.243500      29.387939       0.119266       0.227753       0.161000       0.257900   -9999.000000   -9999.000000
57298     57298     henan          114.5656       32.2244          111       178     2012      05        19        140              0.241750      27.422852       0.000000       0.224841       0.133000   -9999.000000       0.214000   -9999.000000
57298     57298     henan          114.5656       32.2244          111       178     2012      05        20        141              0.239208      28.075409       0.000000       0.218122   -9999.000000       0.305500       0.198600       0.073000
57298     57298     henan          114.5656       32.2244          111       178     2012      05        21        142              0.237417      26.842773       0.523963       0.212931       0.135000       0.388300       0.166600   -9999.000000
57298     57298     henan          114.5656       32.2244          111       178     2012      05        22        143              0.234292      27.294403       0.455489       0.209639       0.129500   -9999.000000       0.203500       0.266000
57298     57298     henan          114.5656       32.2244          111       178     2012      05        23        144              0.232708      25.862061       0.110538       0.212631   -9999.000000   -9999.000000   -9999.000000   -9999.000000
57298     57298     henan          114.5656       32.2244          111       178     2012      05        24        145              0.235125      25.375183       3.646880       0.212861   -9999.000000   -9999.000000   -9999.000000   -9999.000000
57298     57298     henan          114.5656       32.2244          111       178     2012      05        25        146              0.000000      23.676300       0.766152       0.247051       0.145000   -9999.000000       0.152800       0.190000
57298     57298     henan          114.5656       32.2244          111       178     2012      05        26        147              0.239958      23.231842       0.000000       0.245770   -9999.000000       0.199800       0.200800   -9999.000000
57298     57298     henan          114.5656       32.2244          111       178     2012      05        27        148              0.238583      27.812714       0.000000       0.225860       0.155000   -9999.000000       0.215200   -9999.000000
57298     57298     henan          114.5656       32.2244          111       178     2012      05        28        149              0.236833      27.678009       0.000000       0.216032       0.125500       0.303500       0.229800   -9999.000000
57298     57298     henan          114.5656       32.2244          111       178     2012      05        29        150              0.245875      29.042450      11.333435       0.205206       0.193000   -9999.000000   -9999.000000       0.612000
57298     57298     henan          114.5656       32.2244          111       178     2012      05        30        151              0.253375      21.368683       0.000000       0.290488       0.155000   -9999.000000   -9999.000000   -9999.000000
57298     57298     henan          114.5656       32.2244          111       178     2012      05        31        152              0.249667      25.738342       0.000000       0.276055   -9999.000000       0.518900   -9999.000000   -9999.000000
57298     57298     henan          114.5656       32.2244          111       178     2012      06        01        153              0.246583      25.363739       0.245032       0.259045       0.143000   -9999.000000       0.221800       0.036000
57298     57298     henan          114.5656       32.2244          111       178     2012      06        02        154              0.246167      23.222656       0.000000       0.257360       0.135000   -9999.000000       0.282600   -9999.000000
57298     57298     henan          114.5656       32.2244          111       178     2012      06        03        155              0.243917      26.455200       0.000000       0.241641       0.134500   -9999.000000       0.282300       0.035000
57298     57298     henan          114.5656       32.2244          111       178     2012      06        04        156              0.242583      25.683136       0.737642       0.234026       0.110000   -9999.000000   -9999.000000   -9999.000000
57298     57298     henan          114.5656       32.2244          111       178     2012      06        05        157              0.242875      27.661163       3.467459       0.224664   -9999.000000       0.220200       0.173400       0.117000
57298     57298     henan          114.5656       32.2244          111       178     2012      06        06        158              0.263042      26.930511       2.769012       0.240362       0.179000   -9999.000000       0.161300       0.617000
57298     57298     henan          114.5656       32.2244          111       178     2012      06        07        159              0.259375      24.485992       0.000000       0.282512       0.136500       0.232300       0.147600   -9999.000000
57298     57298     henan          114.5656       32.2244          111       178     2012      06        08        160              0.255167      29.093262       0.000000       0.255062       0.128000   -9999.000000       0.160500       0.130000
57298     57298     henan          114.5656       32.2244          111       178     2012      06        09        161              0.251292      31.804626       0.000000       0.232046       0.113000   -9999.000000   -9999.000000   -9999.000000
57298     57298     henan          114.5656       32.2244          111       178     2012      06        10        162              0.248208      33.371399       0.000000       0.214938       0.115000       0.451200   -9999.000000       0.193000
57298     57298     henan          114.5656       32.2244          111       178     2012      06        11        163              0.000000      32.688141       0.000000       0.205750       0.137000   -9999.000000       0.094100   -9999.000000
57298     57298     henan          114.5656       32.2244          111       178     2012      06        12        164              0.243500      29.952087       1.875330       0.202959       0.130000       0.406900       0.114300   -9999.000000
57298     57298     henan          114.5656       32.2244          111       178     2012      06        13        165              0.240625      32.967255       0.228495       0.196411       0.120000       0.278700       0.128000       0.112000
57298     57298     henan          114.5656       32.2244          111       178     2012      06        14        166              0.237625      34.164673       0.000000       0.191546       0.124000   -9999.000000       0.124700   -9999.000000
57298     57298     henan          114.5656       32.2244          111       178     2012      06        15        167              0.236083      30.127136       0.000000       0.192754       0.113000       0.259500   -9999.000000       0.147000
57298     57298     henan          114.5656       32.2244          111       178     2012      06        16        168              0.234333      32.200531       0.000000       0.189045   -9999.000000   -9999.000000   -9999.000000   -9999.000000
57298     57298     henan          114.5656       32.2244          111       178     2012      06        17        169              0.232917      31.787628       0.000000       0.187818       0.122000   -9999.000000       0.096200   -9999.000000
57298     57298     henan          114.5656       32.2244          111       178     2012      06        18        170              0.232917      29.978241       0.000000       0.188537       0.111500       0.203000       0.101900       0.112000
57298     57298     henan          114.5656       32.2244          111       178     2012      06        19        171              0.230875      32.614349       0.000000       0.186439       0.119500   -9999.000000       0.110900   -9999.000000
57298     57298     henan          114.5656       32.2244          111       178     2012      06        20        172              0.229625      32.724426       0.000000       0.184821       0.107000       0.207500   -9999.000000       0.112000
57298     57298     henan          114.5656       32.2244          111       178     2012      06        21        173              0.228875      33.670410       0.000000       0.183367   -9999.000000   -9999.000000   -9999.000000   -9999.000000
57298     57298     henan          114.5656       32.2244          111       178     2012      06        22        174              0.228208      34.749115       0.000000       0.182565       0.138000   -9999.000000       0.088300   -9999.000000
57298     57298     henan          114.5656       32.2244          111       178     2012      06        23        175              0.227708      35.269958       0.000000       0.181928       0.132000       0.427700       0.102700       0.003000
57298     57298     henan          114.5656       32.2244          111       178     2012      06        24        176              0.227875      34.699829       0.000000       0.181511       0.126500   -9999.000000       0.097600   -9999.000000
57298     57298     henan          114.5656       32.2244          111       178     2012      06        25        177              0.227783      35.512115       0.000000       0.181097       0.114000   -9999.000000       0.077300       0.005000
57298     57298     henan          114.5656       32.2244          111       178     2012      06        26        178              0.227190      34.925171       2.303715       0.181344   -9999.000000   -9999.000000   -9999.000000   -9999.000000
57298     57298     henan          114.5656       32.2244          111       178     2012      06        27        179              0.236875      30.897705       3.851971       0.203109       0.197000   -9999.000000   -9999.000000       0.919000
57298     57298     henan          114.5656       32.2244          111       178     2012      06        28        180              0.285833      26.473236      16.543695       0.239580       0.218000       0.285600       0.095500       0.865000
57298     57298     henan          114.5656       32.2244          111       178     2012      06        29        181              0.338958      26.995178      12.638504       0.327813       0.190500   -9999.000000       0.107700   -9999.000000
57298     57298     henan          114.5656       32.2244          111       178     2012      06        30        182              0.339125      29.303070      22.951456       0.328885   -9999.000000       0.572300       0.102300   -9999.000000
57298     57298     henan          114.5656       32.2244          111       178     2012      07        01        183              0.331333      25.425995       3.291415       0.369554       0.277000       0.320200       0.115300   -9999.000000
57298     57298     henan          114.5656       32.2244          111       178     2012      07        02        184              0.342958      26.605469      21.964081       0.354705       0.371000   -9999.000000   -9999.000000       1.000000
57298     57298     henan          114.5656       32.2244          111       178     2012      07        03        185              0.344208      28.493317       1.981290       0.374976       0.315000       0.541100       0.155100   -9999.000000
57298     57298     henan          114.5656       32.2244          111       178     2012      07        04        186              0.340000      30.880554       0.270848       0.358451       0.267500   -9999.000000       0.144000       0.740000
57298     57298     henan          114.5656       32.2244          111       178     2012      07        05        187              0.345000      30.861511       7.921583       0.340905       0.273000       0.493900       0.140000       0.773000
57298     57298     henan          114.5656       32.2244          111       178     2012      07        06        188              0.351083      27.739075       1.665645       0.350489   -9999.000000       0.346600       0.163100   -9999.000000
57298     57298     henan          114.5656       32.2244          111       178     2012      07        07        189              0.345917      30.364349       1.096397       0.345538   -9999.000000   -9999.000000   -9999.000000       0.789000
57298     57298     henan          114.5656       32.2244          111       178     2012      07        08        190              0.345083      31.749878       1.307856       0.331727       0.254000   -9999.000000   -9999.000000   -9999.000000
57298     57298     henan          114.5656       32.2244          111       178     2012      07        09        191              0.344500      32.573120       0.432959       0.318742       0.235000   -9999.000000       0.102200       0.653000
57298     57298     henan          114.5656       32.2244          111       178     2012      07        10        192              0.350167      32.073792       5.192165       0.306713       0.251000       0.397100       0.106900   -9999.000000
57298     57298     henan          114.5656       32.2244          111       178     2012      07        11        193              0.348333      30.338074       0.600856       0.325290       0.219000       0.384500       0.092400   -9999.000000
57298     57298     henan          114.5656       32.2244          111       178     2012      07        12        194              0.347000      33.129303       1.887573       0.308108   -9999.000000   -9999.000000       0.104800       0.642000
57298     57298     henan          114.5656       32.2244          111       178     2012      07        13        195              0.348167      29.671722       2.753800       0.303110       0.302000       0.333600   -9999.000000   -9999.000000
57298     57298     henan          114.5656       32.2244          111       178     2012      07        14        196              0.352917      28.760223       2.520738       0.315855       0.279500       0.175800   -9999.000000       0.640000
57298     57298     henan          114.5656       32.2244          111       178     2012      07        15        197              0.351167      27.767487       0.938649       0.317900       0.261500   -9999.000000       0.090400   -9999.000000
57298     57298     henan          114.5656       32.2244          111       178     2012      07        16        198              0.349292      29.111877       0.277836       0.303580       0.242000       0.349900       0.108000   -9999.000000
57298     57298     henan          114.5656       32.2244          111       178     2012      07        17        199              0.347500      29.727356       0.000000       0.291829       0.229000   -9999.000000       0.122600       0.500000
57298     57298     henan          114.5656       32.2244          111       178     2012      07        18        200              0.346083      30.008423       0.000000       0.281815   -9999.000000   -9999.000000       0.114800   -9999.000000
57298     57298     henan          114.5656       32.2244          111       178     2012      07        19        201              0.345000      30.925812       0.000000       0.269291       0.245000       0.220000   -9999.000000       0.370000
57298     57298     henan          114.5656       32.2244          111       178     2012      07        20        202              0.345000      31.916473       0.000000       0.255958       0.214500   -9999.000000       0.103400   -9999.000000
57298     57298     henan          114.5656       32.2244          111       178     2012      07        21        203              0.344333      32.659088       0.000000       0.247552       0.277000       0.153000       0.101500       0.593000
57298     57298     henan          114.5656       32.2244          111       178     2012      07        22        204              0.344750      34.562042       7.380562       0.234462   -9999.000000   -9999.000000       0.100100       0.327000
57298     57298     henan          114.5656       32.2244          111       178     2012      07        23        205              0.344375      32.871063       0.475157       0.231450   -9999.000000       0.215200       0.145900   -9999.000000
57298     57298     henan          114.5656       32.2244          111       178     2012      07        24        206              0.342667      33.393463       2.974564       0.224636       0.300000       0.133500   -9999.000000       0.309000
57298     57298     henan          114.5656       32.2244          111       178     2012      07        25        207              0.337375      34.460693       8.284342       0.221219       0.281000       0.228800   -9999.000000   -9999.000000
57298     57298     henan          114.5656       32.2244          111       178     2012      07        26        208              0.327708      35.545715       0.000000       0.212695       0.262000       0.118800       0.112000       0.271000
57298     57298     henan          114.5656       32.2244          111       178     2012      07        27        209              0.314583      36.380737       0.000000       0.204745       0.227000   -9999.000000       0.127000       0.301000
57298     57298     henan          114.5656       32.2244          111       178     2012      07        28        210              0.302250      36.806366       1.724952       0.199812       0.251000   -9999.000000       0.130800   -9999.000000
57298     57298     henan          114.5656       32.2244          111       178     2012      07        29        211              0.292917      36.815369       0.000000       0.198325       0.264000       0.198700       0.122100       0.068000
57298     57298     henan          114.5656       32.2244          111       178     2012      07        30        212              0.286500      37.153748       0.720517       0.195398       0.291000   -9999.000000   -9999.000000   -9999.000000
57298     57298     henan          114.5656       32.2244          111       178     2012      07        31        213              0.280292      37.270355       0.000000       0.198527       0.253000   -9999.000000   -9999.000000       0.269000
57298     57298     henan          114.5656       32.2244          111       178     2012      08        01        214              0.274125      37.432007       0.000000       0.194089       0.307500   -9999.000000       0.110500   -9999.000000
57298     57298     henan          114.5656       32.2244          111       178     2012      08        02        215              0.268500      33.685455       0.000000       0.193562       0.257000   -9999.000000       0.117300       0.225000
57298     57298     henan          114.5656       32.2244          111       178     2012      08        03        216              0.264000      33.771545       0.642978       0.191813   -9999.000000       0.146000       0.136200       0.001000
57298     57298     henan          114.5656       32.2244          111       178     2012      08        04        217              0.274208      31.965454      12.440643       0.197001       0.334000   -9999.000000       0.151600   -9999.000000
57298     57298     henan          114.5656       32.2244          111       178     2012      08        05        218              0.277083      28.736816       0.000000       0.321322       0.332500       0.171100   -9999.000000       0.476000
57298     57298     henan          114.5656       32.2244          111       178     2012      08        06        219              0.271042      31.186096       0.000000       0.266805       0.304000       0.464200       0.142000   -9999.000000
57298     57298     henan          114.5656       32.2244          111       178     2012      08        07        220              0.265750      32.246521       0.000000       0.240612       0.267000       0.188400   -9999.000000       0.304000
57298     57298     henan          114.5656       32.2244          111       178     2012      08        08        221              0.262208      32.265930       1.347106       0.224278   -9999.000000       0.147800       0.129100   -9999.000000
57298     57298     henan          114.5656       32.2244          111       178     2012      08        09        222              0.271708      33.136169       1.184555       0.211699       0.361000   -9999.000000       0.158400   -9999.000000
57298     57298     henan          114.5656       32.2244          111       178     2012      08        10        223              0.300217      31.903748       5.494385       0.212333       0.345500       0.181200   -9999.000000       0.535000
57298     57298     henan          114.5656       32.2244          111       178     2012      08        11        224              0.303542      29.317749       1.884845       0.250945       0.314000       0.348200   -9999.000000   -9999.000000
57298     57298     henan          114.5656       32.2244          111       178     2012      08        12        225              0.305292      30.744324       3.225617       0.253589       0.285000       0.166400       0.122800       0.438000
57298     57298     henan          114.5656       32.2244          111       178     2012      08        13        226              0.335458      32.144867       9.193254       0.238162       0.310000       0.216400       0.157500   -9999.000000
57298     57298     henan          114.5656       32.2244          111       178     2012      08        14        227              0.339208      27.381866       0.281199       0.267906   -9999.000000   -9999.000000       0.160300   -9999.000000
57298     57298     henan          114.5656       32.2244          111       178     2012      08        15        228              0.335583      27.381409       0.956003       0.293469       0.315000       0.307800       0.149900       0.550000
57298     57298     henan          114.5656       32.2244          111       178     2012      08        16        229              0.330542      28.910828       0.988891       0.274510       0.282000       0.200800   -9999.000000   -9999.000000
57298     57298     henan          114.5656       32.2244          111       178     2012      08        17        230              0.327583      29.415985       0.000000       0.260835       0.296500   -9999.000000   -9999.000000       0.377000
57298     57298     henan          114.5656       32.2244          111       178     2012      08        18        231              0.335708      30.635193       2.867636       0.249586       0.252000       0.237600       0.133900   -9999.000000
57298     57298     henan          114.5656       32.2244          111       178     2012      08        19        232              0.336583      32.603485       0.237678       0.252112   -9999.000000       0.133100       0.127300   -9999.000000
57298     57298     henan          114.5656       32.2244          111       178     2012      08        20        233              0.338333      31.757294       4.959633       0.243075       0.327000   -9999.000000       0.124200       0.851000
57298     57298     henan          114.5656       32.2244          111       178     2012      08        21        234              0.353417      29.874084      11.036639       0.257383       0.315500       0.305400   -9999.000000   -9999.000000
57298     57298     henan          114.5656       32.2244          111       178     2012      08        22        235              0.348375      25.116547       0.000000       0.325917       0.271500   -9999.000000   -9999.000000   -9999.000000
57298     57298     henan          114.5656       32.2244          111       178     2012      08        23        236              0.345583      23.044495       0.000000       0.295045       0.235000       0.292600       0.133200   -9999.000000
57298     57298     henan          114.5656       32.2244          111       178     2012      08        24        237              0.341833      24.665314       0.000000       0.276925       0.243000       0.365600       0.135800       0.761000
57298     57298     henan          114.5656       32.2244          111       178     2012      08        25        238              0.000000      26.756958       1.300175       0.261503   -9999.000000   -9999.000000       0.121200       0.463000
57298     57298     henan          114.5656       32.2244          111       178     2012      08        26        239              0.351583      28.908661      77.296768       0.252277       0.324000       0.229300       0.144000   -9999.000000
57298     57298     henan          114.5656       32.2244          111       178     2012      08        27        240              0.352417      24.441376       3.337589       0.426008       0.294000   -9999.000000   -9999.000000       0.799000
57298     57298     henan          114.5656       32.2244          111       178     2012      08        28        241              0.349750      25.808594       0.122736       0.370933       0.297000       0.338200   -9999.000000   -9999.000000
57298     57298     henan          114.5656       32.2244          111       178     2012      08        29        242              0.347417      27.553833       0.263715       0.350219       0.264000       0.261100       0.125100       0.639000
57298     57298     henan          114.5656       32.2244          111       178     2012      08        30        243              0.345833      29.681244       0.233717       0.336693   -9999.000000   -9999.000000       0.142000   -9999.000000
57298     57298     henan          114.5656       32.2244          111       178     2012      08        31        244              0.345087      29.743439       0.919339       0.327498       0.283000       0.231300       0.144500       0.814000
57298     57298     henan          114.5656       32.2244          111       178     2012      09        01        245              0.349292      30.392334       2.744253       0.319427       0.226000   -9999.000000       0.144900       0.744000
57298     57298     henan          114.5656       32.2244          111       178     2012      09        02        246              0.347958      30.537994       0.246266       0.320382       0.230500       0.191300   -9999.000000   -9999.000000
57298     57298     henan          114.5656       32.2244          111       178     2012      09        03        247              0.345727      25.164124       0.000000       0.315263       0.186000       0.380800       0.174100       0.417000
57298     57298     henan          114.5656       32.2244          111       178     2012      09        04        248              0.343042      26.806122       0.000000       0.304885   -9999.000000   -9999.000000       0.170100   -9999.000000
57298     57298     henan          114.5656       32.2244          111       178     2012      09        05        249              0.338583      26.519104       0.000000       0.294310       0.229000       0.153500       0.176300       0.424000
57298     57298     henan          114.5656       32.2244          111       178     2012      09        06        250              0.335583      26.650299       0.432789       0.284284       0.165000   -9999.000000       0.178800   -9999.000000
57298     57298     henan          114.5656       32.2244          111       178     2012      09        07        251              0.338583      27.285919      53.249363       0.281056       0.208000   -9999.000000   -9999.000000   -9999.000000
57298     57298     henan          114.5656       32.2244          111       178     2012      09        08        252              0.352000      28.130341      35.947018       0.337658       0.307000       0.542600   -9999.000000       1.000000
57298     57298     henan          114.5656       32.2244          111       178     2012      09        09        253              0.350917      22.654724       0.000000       0.444444       0.265000   -9999.000000       0.190300   -9999.000000
57298     57298     henan          114.5656       32.2244          111       178     2012      09        10        254              0.350333      24.320038       0.000000       0.374636   -9999.000000       0.375300       0.238100       0.699000
57298     57298     henan          114.5656       32.2244          111       178     2012      09        11        255              0.351417      24.938446      11.261062       0.363467   -9999.000000       0.484900       0.273900   -9999.000000
57298     57298     henan          114.5656       32.2244          111       178     2012      09        12        256              0.352167      23.718872       0.646934       0.377775       0.185000   -9999.000000       0.236700   -9999.000000
57298     57298     henan          114.5656       32.2244          111       178     2012      09        13        257              0.352000      21.796906       0.206221       0.365708       0.149000       0.319100   -9999.000000       0.887000
57298     57298     henan          114.5656       32.2244          111       178     2012      09        14        258              0.349913      20.654510       0.171054       0.356046       0.146000   -9999.000000   -9999.000000   -9999.000000
57298     57298     henan          114.5656       32.2244          111       178     2012      09        15        259              0.347750      22.257812       0.000000       0.347273   -9999.000000       0.441300       0.190000       0.727000
57298     57298     henan          114.5656       32.2244          111       178     2012      09        16        260              0.345870      22.940125       0.000000       0.340796       0.189000       0.282600       0.211500   -9999.000000
57298     57298     henan          114.5656       32.2244          111       178     2012      09        17        261              0.344826      22.930908       0.000000       0.335879       0.167000   -9999.000000       0.228600   -9999.000000
57298     57298     henan          114.5656       32.2244          111       178     2012      09        18        262              0.343292      22.588715       0.737263       0.330987       0.164000       0.212700       0.226900       0.690000
57298     57298     henan          114.5656       32.2244          111       178     2012      09        19        263              0.340917      23.737915       0.000000       0.327512       0.158000   -9999.000000   -9999.000000   -9999.000000
57298     57298     henan          114.5656       32.2244          111       178     2012      09        20        264              0.340000      24.865265       0.000000       0.322567       0.167000       0.198900       0.200700       0.732000
57298     57298     henan          114.5656       32.2244          111       178     2012      09        21        265              0.339522      25.266327       0.078910       0.319364   -9999.000000       0.562900       0.203600   -9999.000000
57298     57298     henan          114.5656       32.2244          111       178     2012      09        22        266              0.337750      22.969849       0.000000       0.318890       0.157000   -9999.000000       0.209700       0.721000
57298     57298     henan          114.5656       32.2244          111       178     2012      09        23        267              0.335917      24.844299       0.372186       0.314602       0.150000       0.459900       0.236100       0.754000
57298     57298     henan          114.5656       32.2244          111       178     2012      09        24        268              0.331957      24.202606       0.000000       0.313177       0.150500   -9999.000000   -9999.000000   -9999.000000
57298     57298     henan          114.5656       32.2244          111       178     2012      09        25        269              0.327000      25.010223       8.063503       0.308518       0.152000       0.321300   -9999.000000       0.663000
57298     57298     henan          114.5656       32.2244          111       178     2012      09        26        270              0.323174      24.810089       0.056939       0.330782   -9999.000000       0.310100       0.205600   -9999.000000
57298     57298     henan          114.5656       32.2244          111       178     2012      09        27        271              0.319786      23.511017       0.000000       0.323972       0.145000   -9999.000000       0.250000       0.660000
57298     57298     henan          114.5656       32.2244          111       178     2012      09        28        272              0.307500      23.724884       0.000000       0.316060       0.146000   -9999.000000       0.280200   -9999.000000
57298     57298     henan          114.5656       32.2244          111       178     2012      09        29        273              0.303625      20.026978       0.000000       0.306248       0.145000   -9999.000000       0.275000       0.846000
57298     57298     henan          114.5656       32.2244          111       178     2012      09        30        274              0.300000      20.369934       0.000000       0.301753       0.147000   -9999.000000   -9999.000000       0.433000
57298     57298     henan          114.5656       32.2244          111       178     2012      10        01        275              0.296958      20.865784       0.000000       0.298076   -9999.000000   -9999.000000   -9999.000000   -9999.000000
57298     57298     henan          114.5656       32.2244          111       178     2012      10        02        276              0.293870      21.331818       0.000000       0.292719       0.110000   -9999.000000       0.169400       0.548000
57298     57298     henan          114.5656       32.2244          111       178     2012      10        03        277              0.291667      21.858978       0.000000       0.287836       0.110000       0.291100       0.193600   -9999.000000
57298     57298     henan          114.5656       32.2244          111       178     2012      10        04        278              0.291208      21.420685       0.000000       0.286213       0.124000   -9999.000000       0.236500       0.459000
57298     57298     henan          114.5656       32.2244          111       178     2012      10        05        279              0.290542      21.986603       0.000000       0.284497       0.126000       0.452600       0.235400   -9999.000000
57298     57298     henan          114.5656       32.2244          111       178     2012      10        06        280              0.286458      20.925781       0.000000       0.286083       0.126000       0.317400   -9999.000000   -9999.000000
57298     57298     henan          114.5656       32.2244          111       178     2012      10        07        281              0.282583      21.384216       0.575559       0.284539   -9999.000000   -9999.000000       0.186300       0.514000
57298     57298     henan          114.5656       32.2244          111       178     2012      10        08        282              0.281333      22.426361       0.107285       0.281514       0.128000       0.174100       0.125300   -9999.000000
57298     57298     henan          114.5656       32.2244          111       178     2012      10        09        283              0.279292      22.699738       0.000000       0.276754       0.124500       0.295500       0.127600       0.432000
57298     57298     henan          114.5656       32.2244          111       178     2012      10        10        284              0.277417      21.950592       0.000000       0.272601       0.117000   -9999.000000       0.150800   -9999.000000
57298     57298     henan          114.5656       32.2244          111       178     2012      10        11        285              0.276375      20.777832       0.000000       0.267868       0.089000       0.237800   -9999.000000   -9999.000000
57298     57298     henan          114.5656       32.2244          111       178     2012      10        12        286              0.275542      20.381104       0.000000       0.266010   -9999.000000   -9999.000000   -9999.000000       0.511000
57298     57298     henan          114.5656       32.2244          111       178     2012      10        13        287              0.275208      19.964661       0.000000       0.269797       0.094000   -9999.000000       0.107800   -9999.000000
57298     57298     henan          114.5656       32.2244          111       178     2012      10        14        288              0.274000      20.925201       0.000000       0.268611       0.092500       0.145300       0.149100       0.425000
57298     57298     henan          114.5656       32.2244          111       178     2012      10        15        289              0.275958      21.867676       4.394923       0.266311       0.108000   -9999.000000       0.134200   -9999.000000
57298     57298     henan          114.5656       32.2244          111       178     2012      10        16        290              0.282958      20.861176       0.229651       0.286766       0.114000       0.269700       0.154300   -9999.000000
57298     57298     henan          114.5656       32.2244          111       178     2012      10        17        291              0.278565      16.765137       0.000000       0.293693       0.099000       0.360200   -9999.000000       0.359000
57298     57298     henan          114.5656       32.2244          111       178     2012      10        18        292              0.276500      16.330444       0.000000       0.280129   -9999.000000   -9999.000000   -9999.000000   -9999.000000
57298     57298     henan          114.5656       32.2244          111       178     2012      10        19        293              0.275500      18.588104       0.000000       0.274572       0.100000       0.184700       0.109100       0.375000
57298     57298     henan          114.5656       32.2244          111       178     2012      10        20        294              0.273333      19.386536       1.846688       0.272309       0.092500   -9999.000000       0.119900   -9999.000000
57298     57298     henan          114.5656       32.2244          111       178     2012      10        21        295              0.297375      21.033600       4.692376       0.269388       0.144000       0.218300       0.132200       1.000000
57298     57298     henan          114.5656       32.2244          111       178     2012      10        22        296              0.313958      20.998657       0.000000       0.287353   -9999.000000       0.223500   -9999.000000       0.582000
57298     57298     henan          114.5656       32.2244          111       178     2012      10        23        297              0.300750      15.734283       0.000000       0.287798   -9999.000000   -9999.000000   -9999.000000   -9999.000000
57298     57298     henan          114.5656       32.2244          111       178     2012      10        24        298              0.293792      17.464783       0.000000       0.279547   -9999.000000       0.263200       0.091000       0.427000
57298     57298     henan          114.5656       32.2244          111       178     2012      10        25        299              0.000000      17.519135       3.683559       0.276872       0.132000   -9999.000000       0.118200   -9999.000000
57298     57298     henan          114.5656       32.2244          111       178     2012      10        26        300              0.326375      18.801971       4.142754       0.278788       0.164500       0.437100       0.132500       1.000000
57298     57298     henan          114.5656       32.2244          111       178     2012      10        27        301              0.319250      16.310120       0.000000       0.318778       0.113000       0.356300       0.120900   -9999.000000
57298     57298     henan          114.5656       32.2244          111       178     2012      10        28        302              0.000000      17.899170       0.000000       0.302577   -9999.000000   -9999.000000   -9999.000000       0.895000
57298     57298     henan          114.5656       32.2244          111       178     2012      10        29        303              0.317125      19.005920       0.570393       0.295107       0.172000       0.281100   -9999.000000       0.924000
57298     57298     henan          114.5656       32.2244          111       178     2012      10        30        304              0.315375      16.218933       0.000000       0.297761   -9999.000000   -9999.000000       0.100700   -9999.000000
57298     57298     henan          114.5656       32.2244          111       178     2012      10        31        305              0.308792      14.489166       0.271219       0.293570       0.116000   -9999.000000       0.118500       0.483000
57298     57298     henan          114.5656       32.2244          111       178     2012      11        01        306              0.302625      14.289368       0.000000       0.287563       0.117000       0.276200       0.131300   -9999.000000
57298     57298     henan          114.5656       32.2244          111       178     2012      11        02        307              0.297333      14.515167       0.000000       0.285364       0.122000   -9999.000000       0.124500       0.351000
57298     57298     henan          114.5656       32.2244          111       178     2012      11        03        308              0.320458      16.055176      17.408207       0.280972   -9999.000000   -9999.000000   -9999.000000   -9999.000000
57298     57298     henan          114.5656       32.2244          111       178     2012      11        04        309              0.311667      10.968323       5.037160       0.343036   -9999.000000       0.519300       0.120300   -9999.000000
57298     57298     henan          114.5656       32.2244          111       178     2012      11        05        310              0.303917      10.785797       0.000000       0.340938       0.129000   -9999.000000       0.106100       0.480000
57298     57298     henan          114.5656       32.2244          111       178     2012      11        06        311              0.299708       9.937897       0.000000       0.323110       0.125000       0.174600       0.110500   -9999.000000
57298     57298     henan          114.5656       32.2244          111       178     2012      11        07        312              0.298087      10.830292       2.291065       0.316677       0.127000   -9999.000000       0.128300       0.452000
57298     57298     henan          114.5656       32.2244          111       178     2012      11        08        313              0.304000      13.097076       0.097579       0.318561   -9999.000000       0.217800   -9999.000000   -9999.000000
57298     57298     henan          114.5656       32.2244          111       178     2012      11        09        314              0.313542      11.484344       8.360353       0.322727       0.220000       0.164200   -9999.000000   -9999.000000
57298     57298     henan          114.5656       32.2244          111       178     2012      11        10        315              0.319667      10.834747       0.193325       0.343781   -9999.000000   -9999.000000       0.123500       0.854000
57298     57298     henan          114.5656       32.2244          111       178     2012      11        11        316              0.313625       9.511749       0.000000       0.336942       0.129000       0.146300       0.135200   -9999.000000
57298     57298     henan          114.5656       32.2244          111       178     2012      11        12        317              0.309375      10.213226       0.073889       0.327104       0.119000   -9999.000000       0.119900       0.504000
57298     57298     henan          114.5656       32.2244          111       178     2012      11        13        318              0.000000      11.470612       0.000000       0.323787       0.118000       0.233500       0.122000   -9999.000000
57298     57298     henan          114.5656       32.2244          111       178     2012      11        14        319              0.298792      11.601440       0.000000       0.319406   -9999.000000       0.126800   -9999.000000       0.460000
57298     57298     henan          114.5656       32.2244          111       178     2012      11        15        320              0.293792      10.607971       0.654301       0.315674       0.150000   -9999.000000   -9999.000000       0.575000
57298     57298     henan          114.5656       32.2244          111       178     2012      11        16        321              0.293458      10.311127       0.107377       0.316265       0.100000   -9999.000000       0.089000   -9999.000000
57298     57298     henan          114.5656       32.2244          111       178     2012      11        17        322              0.000000      10.165161       0.000000       0.314935       0.111000   -9999.000000       0.100200       0.332000
57298     57298     henan          114.5656       32.2244          111       178     2012      11        18        323              0.288208      11.428192       0.000000       0.311959       0.114000       0.300900       0.110200   -9999.000000
57298     57298     henan          114.5656       32.2244          111       178     2012      11        19        324              0.286958      12.505005       0.000000       0.309981   -9999.000000       0.185500       0.097700       0.450000
57298     57298     henan          114.5656       32.2244          111       178     2012      11        20        325              0.287208      12.197754       2.986163       0.308970       0.167000   -9999.000000   -9999.000000       0.398000
57298     57298     henan          114.5656       32.2244          111       178     2012      11        21        326              0.292000      10.628906       0.000000       0.316025       0.163000       0.284900       0.106400   -9999.000000
57298     57298     henan          114.5656       32.2244          111       178     2012      11        22        327              0.296875      10.194031       3.258533       0.321526       0.163000       0.530300       0.098900       0.663000
57298     57298     henan          114.5656       32.2244          111       178     2012      11        23        328              0.302292       9.372284       2.714330       0.326617   -9999.000000   -9999.000000       0.102600   -9999.000000
57298     57298     henan          114.5656       32.2244          111       178     2012      11        24        329              0.299667       7.284119       2.081847       0.323780   -9999.000000       0.224000       0.092300       0.568000
57298     57298     henan          114.5656       32.2244          111       178     2012      11        25        330              0.321500       8.694855       4.891870       0.322889   -9999.000000   -9999.000000   -9999.000000   -9999.000000
57298     57298     henan          114.5656       32.2244          111       178     2012      11        26        331              0.316304       6.030182       0.893265       0.344531   -9999.000000       0.357500   -9999.000000       0.552000
57298     57298     henan          114.5656       32.2244          111       178     2012      11        27        332              0.308870       7.384552       0.000000       0.334214       0.136000       0.255100       0.096800       0.448000
57298     57298     henan          114.5656       32.2244          111       178     2012      11        28        333              0.303833       9.184204       0.034213       0.327583   -9999.000000       0.352300       0.113400   -9999.000000
57298     57298     henan          114.5656       32.2244          111       178     2012      11        29        334              0.306500       7.536316       2.087405       0.324119       0.142000       0.291600       0.127600       0.749000
57298     57298     henan          114.5656       32.2244          111       178     2012      11        30        335              0.310917       7.971008       0.081135       0.328545   -9999.000000   -9999.000000       0.146300   -9999.000000
57298     57298     henan          114.5656       32.2244          111       178     2012      12        01        336              0.312250       8.618744       2.344044       0.327178   -9999.000000       0.341100   -9999.000000       0.631000
57298     57298     henan          114.5656       32.2244          111       178     2012      12        02        337              0.313083       4.277039       0.054393       0.332792   -9999.000000       0.203000   -9999.000000   -9999.000000
57298     57298     henan          114.5656       32.2244          111       178     2012      12        03        338              0.309417       4.368408       0.065172       0.330125       0.141000       0.137100       0.114900   -9999.000000
57298     57298     henan          114.5656       32.2244          111       178     2012      12        04        339              0.307333       6.451874       0.923067       0.325537   -9999.000000       0.191000       0.123500       0.462000
57298     57298     henan          114.5656       32.2244          111       178     2012      12        05        340              0.303875       6.909363       0.000000       0.328296   -9999.000000   -9999.000000       0.147400   -9999.000000
57298     57298     henan          114.5656       32.2244          111       178     2012      12        06        341              0.302208       6.517273       0.071848       0.323298   -9999.000000       0.219600       0.147100       0.395000
57298     57298     henan          114.5656       32.2244          111       178     2012      12        07        342              0.299792       7.155609       0.039694       0.321664       0.118000       0.173200   -9999.000000   -9999.000000
57298     57298     henan          114.5656       32.2244          111       178     2012      12        08        343              0.297292       6.624359       1.377440       0.319281   -9999.000000   -9999.000000       0.120300   -9999.000000
57298     57298     henan          114.5656       32.2244          111       178     2012      12        09        344              0.294375       5.146881       0.352859       0.316957   -9999.000000       0.246800       0.120400       0.234000
57298     57298     henan          114.5656       32.2244          111       178     2012      12        10        345              0.291958       4.369629       0.101901       0.314604   -9999.000000       0.251200       0.118500   -9999.000000
57298     57298     henan          114.5656       32.2244          111       178     2012      12        11        346              0.290917       2.801910       0.243365       0.305884   -9999.000000   -9999.000000       0.117200       0.245000
57298     57298     henan          114.5656       32.2244          111       178     2012      12        12        347              0.290208       3.579468       0.671506       0.304609       0.133000       0.251000   -9999.000000   -9999.000000
57298     57298     henan          114.5656       32.2244          111       178     2012      12        13        348              0.325250       4.525787      28.740938       0.315456   -9999.000000   -9999.000000   -9999.000000   -9999.000000
57298     57298     henan          114.5656       32.2244          111       178     2012      12        14        349              0.326042       2.926056       1.308781       0.383810   -9999.000000   -9999.000000       0.122300       0.775000
57298     57298     henan          114.5656       32.2244          111       178     2012      12        15        350              0.000000       3.151947       0.859612       0.361785   -9999.000000       0.484900       0.164600   -9999.000000
57298     57298     henan          114.5656       32.2244          111       178     2012      12        16        351              0.322000       2.980377       0.133890       0.356598   -9999.000000   -9999.000000       0.159300       0.766000
57298     57298     henan          114.5656       32.2244          111       178     2012      12        17        352              0.326417       3.699585       6.314673       0.352602   -9999.000000       0.356000       0.160100   -9999.000000
57298     57298     henan          114.5656       32.2244          111       178     2012      12        18        353              0.322667       3.206085       0.361971       0.354029   -9999.000000   -9999.000000   -9999.000000       0.527000
57298     57298     henan          114.5656       32.2244          111       178     2012      12        19        354              0.317292       2.591522       0.372697       0.333229   -9999.000000       0.613500       0.174700       0.582000
57298     57298     henan          114.5656       32.2244          111       178     2012      12        20        355              0.000000       2.880096       0.161918       0.337442   -9999.000000       0.439600       0.140500   -9999.000000
57298     57298     henan          114.5656       32.2244          111       178     2012      12        21        356              0.322500       1.325745       2.245500       0.324972   -9999.000000       0.484600       0.127000       0.418000
57298     57298     henan          114.5656       32.2244          111       178     2012      12        22        357              0.317917       2.453125       0.393076       0.329656   -9999.000000       0.473300       0.181500   -9999.000000
57298     57298     henan          114.5656       32.2244          111       178     2012      12        23        358              0.308750       2.035156       0.071819       0.315860   -9999.000000   -9999.000000   -9999.000000       0.099000
57298     57298     henan          114.5656       32.2244          111       178     2012      12        24        359              0.305810       0.731781       0.000000       0.276375   -9999.000000       0.209600   -9999.000000   -9999.000000
57298     57298     henan          114.5656       32.2244          111       178     2012      12        25        360              0.308958       2.340027       0.078713       0.309680   -9999.000000   -9999.000000       0.103300       0.154000
57298     57298     henan          114.5656       32.2244          111       178     2012      12        26        361              0.000000       0.713654       0.304293       0.290808   -9999.000000   -9999.000000       0.140800       0.150000
57298     57298     henan          114.5656       32.2244          111       178     2012      12        27        362              0.319636      -0.099182       1.919592       0.242408   -9999.000000       0.231200       0.135300   -9999.000000
57298     57298     henan          114.5656       32.2244          111       178     2012      12        28        363              0.322000       0.203857       3.899089       0.256080   -9999.000000   -9999.000000       0.140500       0.470000
57298     57298     henan          114.5656       32.2244          111       178     2012      12        29        364              0.000000       0.410583       3.197944       0.279208   -9999.000000   -9999.000000   -9999.000000   -9999.000000
57298     57298     henan          114.5656       32.2244          111       178     2012      12        30        365              0.000000      -0.731354       2.652304       0.249319   -9999.000000       0.144100   -9999.000000       0.242000
57298     57298     henan          114.5656       32.2244          111       178     2012      12        31        366              0.324600       0.058563       0.056503       0.256732   -9999.000000   -9999.000000       0.114900   -9999.000000
