# Supplementary material for: Research on Fusing Multisatellite Soil Moisture Data Based on Bayesian Model Averaging
Source: Hindawi journal article supplement (doi:10.1155/2018/9310838), 2018-06-25
Supplement: f1 [file 9310838.f1.zip › 2012_sm00-10cm_daily_ZDB_ZHY_57358_366days_allin.txt]

57358     57358     hubei          110.9700       30.8197          117       164     2012      01        01        001              0.000000   -9999.000000       0.192937   -9999.000000       0.114000   -9999.000000       0.063600   -9999.000000
57358     57358     hubei          110.9700       30.8197          117       164     2012      01        02        002              0.128208       4.149597       2.487012       0.264551   -9999.000000       0.054900   -9999.000000       0.100000
57358     57358     hubei          110.9700       30.8197          117       164     2012      01        03        003              0.000000       3.450714       0.231103       0.270706   -9999.000000   -9999.000000   -9999.000000   -9999.000000
57358     57358     hubei          110.9700       30.8197          117       164     2012      01        04        004              0.139292       1.863037       0.391055       0.252922   -9999.000000   -9999.000000       0.050800   -9999.000000
57358     57358     hubei          110.9700       30.8197          117       164     2012      01        05        005              0.134792       2.062744       1.411030       0.244823   -9999.000000       0.033000       0.053800       0.044000
57358     57358     hubei          110.9700       30.8197          117       164     2012      01        06        006              0.135750       1.408600       0.924201       0.229420       0.112000   -9999.000000       0.051500   -9999.000000
57358     57358     hubei          110.9700       30.8197          117       164     2012      01        07        007              0.131667       2.964417       0.557961       0.252432   -9999.000000       0.086100       0.051100       0.032000
57358     57358     hubei          110.9700       30.8197          117       164     2012      01        08        008              0.000000       2.930725       0.789099       0.255987   -9999.000000   -9999.000000   -9999.000000   -9999.000000
57358     57358     hubei          110.9700       30.8197          117       164     2012      01        09        009              0.128333       2.842041       0.000000       0.256478   -9999.000000       0.050600   -9999.000000   -9999.000000
57358     57358     hubei          110.9700       30.8197          117       164     2012      01        10        010              0.127167       3.031830       0.000000       0.258941   -9999.000000       0.107600       0.047100       0.041000
57358     57358     hubei          110.9700       30.8197          117       164     2012      01        11        011              0.126333       2.632446       0.317282       0.257448   -9999.000000   -9999.000000       0.050100   -9999.000000
57358     57358     hubei          110.9700       30.8197          117       164     2012      01        12        012              0.125750       2.764587       0.000000       0.253885   -9999.000000       0.046600       0.049300       0.036000
57358     57358     hubei          110.9700       30.8197          117       164     2012      01        13        013              0.124708       3.036163       0.441665       0.255423       0.108000       0.021500   -9999.000000   -9999.000000
57358     57358     hubei          110.9700       30.8197          117       164     2012      01        14        014              0.124250       2.888641       1.021797       0.257248   -9999.000000   -9999.000000   -9999.000000       0.044000
57358     57358     hubei          110.9700       30.8197          117       164     2012      01        15        015              0.125167       2.380524       0.186710       0.257107   -9999.000000       0.088200       0.047200   -9999.000000
57358     57358     hubei          110.9700       30.8197          117       164     2012      01        16        016              0.125458       3.184143       0.356647       0.259719   -9999.000000   -9999.000000       0.042400   -9999.000000
57358     57358     hubei          110.9700       30.8197          117       164     2012      01        17        017              0.000000       3.073090       0.450684       0.258452   -9999.000000       0.031700       0.043900       0.065000
57358     57358     hubei          110.9700       30.8197          117       164     2012      01        18        018              0.126875       2.739288       0.268910       0.259013   -9999.000000   -9999.000000       0.044800   -9999.000000
57358     57358     hubei          110.9700       30.8197          117       164     2012      01        19        019              0.128792       2.857697       0.781973       0.258282   -9999.000000   -9999.000000   -9999.000000       0.143000
57358     57358     hubei          110.9700       30.8197          117       164     2012      01        20        020              0.150625       2.445221       4.485904       0.256656   -9999.000000   -9999.000000   -9999.000000   -9999.000000
57358     57358     hubei          110.9700       30.8197          117       164     2012      01        21        021              0.163875       1.733429       1.143862       0.256860   -9999.000000   -9999.000000       0.038700       0.092000
57358     57358     hubei          110.9700       30.8197          117       164     2012      01        22        022              0.154542       0.846649       0.397891       0.220054   -9999.000000   -9999.000000       0.039700       0.044000
57358     57358     hubei          110.9700       30.8197          117       164     2012      01        23        023              0.148667       0.472809       0.254195       0.195555   -9999.000000       0.092900       0.043100   -9999.000000
57358     57358     hubei          110.9700       30.8197          117       164     2012      01        24        024              0.145625       0.466553       0.306982       0.189944   -9999.000000   -9999.000000   -9999.000000       0.019000
57358     57358     hubei          110.9700       30.8197          117       164     2012      01        25        025              0.144375       1.125549       1.297775       0.209125   -9999.000000       0.025200   -9999.000000   -9999.000000
57358     57358     hubei          110.9700       30.8197          117       164     2012      01        26        026              0.144833       2.239349       1.005036       0.234054   -9999.000000   -9999.000000   -9999.000000       0.047000
57358     57358     hubei          110.9700       30.8197          117       164     2012      01        27        027              0.138292       3.728119       0.220282       0.251200   -9999.000000   -9999.000000       0.042000   -9999.000000
57358     57358     hubei          110.9700       30.8197          117       164     2012      01        28        028              0.138708       3.393860       0.452375       0.254645       0.097000       0.059200       0.037600   -9999.000000
57358     57358     hubei          110.9700       30.8197          117       164     2012      01        29        029              0.135792       4.433105       0.000000       0.258033   -9999.000000   -9999.000000       0.041900       0.119000
57358     57358     hubei          110.9700       30.8197          117       164     2012      01        30        030              0.132750       4.533966       0.000000       0.257926   -9999.000000       0.067400   -9999.000000   -9999.000000
57358     57358     hubei          110.9700       30.8197          117       164     2012      01        31        031              0.137042       3.224457       1.853746       0.254737   -9999.000000   -9999.000000   -9999.000000       0.235000
57358     57358     hubei          110.9700       30.8197          117       164     2012      02        01        032              0.130333       6.907501       0.265296       0.258094   -9999.000000   -9999.000000       0.060000   -9999.000000
57358     57358     hubei          110.9700       30.8197          117       164     2012      02        02        033              0.129625       3.429993       0.706280       0.258086   -9999.000000       0.071500       0.057800   -9999.000000
57358     57358     hubei          110.9700       30.8197          117       164     2012      02        03        034              0.134250       3.039490       0.406976       0.246332       0.095000   -9999.000000       0.054900       0.027000
57358     57358     hubei          110.9700       30.8197          117       164     2012      02        04        035              0.129375       4.792572       0.000000       0.252882   -9999.000000   -9999.000000       0.057500   -9999.000000
57358     57358     hubei          110.9700       30.8197          117       164     2012      02        05        036              0.127792       4.930878       3.742681       0.256571       0.102000   -9999.000000   -9999.000000       0.017000
57358     57358     hubei          110.9700       30.8197          117       164     2012      02        06        037              0.127542       3.522125       0.000000       0.257326   -9999.000000   -9999.000000   -9999.000000   -9999.000000
57358     57358     hubei          110.9700       30.8197          117       164     2012      02        07        038              0.126958       4.041870       0.000000       0.257067   -9999.000000       0.006000       0.057400   -9999.000000
57358     57358     hubei          110.9700       30.8197          117       164     2012      02        08        039              0.126583       3.187256       0.000000       0.247031   -9999.000000   -9999.000000       0.057800       0.146000
57358     57358     hubei          110.9700       30.8197          117       164     2012      02        09        040              0.124458       3.332794       0.000000       0.244616   -9999.000000       0.108500       0.059400   -9999.000000
57358     57358     hubei          110.9700       30.8197          117       164     2012      02        10        041              0.126750       1.385101       0.000000       0.223270   -9999.000000   -9999.000000       0.056100       0.082000
57358     57358     hubei          110.9700       30.8197          117       164     2012      02        11        042              0.136167       3.363251       0.000000       0.240352   -9999.000000   -9999.000000   -9999.000000   -9999.000000
57358     57358     hubei          110.9700       30.8197          117       164     2012      02        12        043              0.124458       5.339355       4.349838       0.250574   -9999.000000   -9999.000000   -9999.000000       0.049000
57358     57358     hubei          110.9700       30.8197          117       164     2012      02        13        044              0.122125       4.402222       0.000000       0.252391   -9999.000000   -9999.000000   -9999.000000   -9999.000000
57358     57358     hubei          110.9700       30.8197          117       164     2012      02        14        045              0.121958       2.903870       0.256611       0.251220       0.117000   -9999.000000       0.054400   -9999.000000
57358     57358     hubei          110.9700       30.8197          117       164     2012      02        15        046              0.122958       3.103882       0.283394       0.253594   -9999.000000   -9999.000000       0.054100       0.028000
57358     57358     hubei          110.9700       30.8197          117       164     2012      02        16        047              0.125542       3.180206       0.389257       0.253221   -9999.000000   -9999.000000   -9999.000000   -9999.000000
57358     57358     hubei          110.9700       30.8197          117       164     2012      02        17        048              0.125708       5.101288       0.000000       0.254643       0.101000       0.149400   -9999.000000       0.088000
57358     57358     hubei          110.9700       30.8197          117       164     2012      02        18        049              0.125500       4.710510       0.000000       0.251693       0.102000   -9999.000000       0.051600   -9999.000000
57358     57358     hubei          110.9700       30.8197          117       164     2012      02        19        050              0.130667       4.711121       0.000000       0.249171       0.097000   -9999.000000       0.054600   -9999.000000
57358     57358     hubei          110.9700       30.8197          117       164     2012      02        20        051              0.123652       6.561401       0.000000       0.251439   -9999.000000       0.057400       0.045300       0.037000
57358     57358     hubei          110.9700       30.8197          117       164     2012      02        21        052              0.123125       5.194611       0.000000       0.253126       0.077000   -9999.000000   -9999.000000   -9999.000000
57358     57358     hubei          110.9700       30.8197          117       164     2012      02        22        053              0.122875       5.397034       0.000000       0.253789       0.074500       0.151100   -9999.000000       0.233000
57358     57358     hubei          110.9700       30.8197          117       164     2012      02        23        054              0.122000       6.645142       0.862332       0.254107       0.082000   -9999.000000   -9999.000000   -9999.000000
57358     57358     hubei          110.9700       30.8197          117       164     2012      02        24        055              0.121000       5.689331       0.358130       0.257575       0.086000   -9999.000000       0.043100       0.015000
57358     57358     hubei          110.9700       30.8197          117       164     2012      02        25        056              0.122250       3.840210       0.230981       0.257104   -9999.000000       0.033600       0.044200   -9999.000000
57358     57358     hubei          110.9700       30.8197          117       164     2012      02        26        057              0.125875       2.632385       0.973170       0.247474   -9999.000000   -9999.000000       0.044500   -9999.000000
57358     57358     hubei          110.9700       30.8197          117       164     2012      02        27        058              0.128348       2.738983       0.655931       0.246599   -9999.000000   -9999.000000   -9999.000000       0.089000
57358     57358     hubei          110.9700       30.8197          117       164     2012      02        28        059              0.130083       2.419434       1.038031       0.246488   -9999.000000   -9999.000000   -9999.000000   -9999.000000
57358     57358     hubei          110.9700       30.8197          117       164     2012      02        29        060              0.000000   -9999.000000       0.429128   -9999.000000   -9999.000000   -9999.000000   -9999.000000   -9999.000000
57358     57358     hubei          110.9700       30.8197          117       164     2012      03        01        061              0.128750       3.107330       0.297281       0.255125   -9999.000000       0.081500       0.041900   -9999.000000
57358     57358     hubei          110.9700       30.8197          117       164     2012      03        02        062              0.128208       4.116150       2.731580       0.258767   -9999.000000   -9999.000000       0.049500   -9999.000000
57358     57358     hubei          110.9700       30.8197          117       164     2012      03        03        063              0.148542       3.748291       1.961100       0.259103   -9999.000000       0.126600       0.049900       0.316000
57358     57358     hubei          110.9700       30.8197          117       164     2012      03        04        064              0.148833       3.231934       0.301269       0.268211   -9999.000000   -9999.000000   -9999.000000   -9999.000000
57358     57358     hubei          110.9700       30.8197          117       164     2012      03        05        065              0.145958       3.218811       1.531956       0.262135       0.103000   -9999.000000   -9999.000000       0.187000
57358     57358     hubei          110.9700       30.8197          117       164     2012      03        06        066              0.141583       5.853180       0.760472       0.266071       0.117000       0.070800       0.048700   -9999.000000
57358     57358     hubei          110.9700       30.8197          117       164     2012      03        07        067              0.000000       4.954010       2.109053       0.264247   -9999.000000   -9999.000000       0.048600   -9999.000000
57358     57358     hubei          110.9700       30.8197          117       164     2012      03        08        068              0.157500       3.723694       1.344531       0.266941   -9999.000000   -9999.000000       0.048000       0.152000
57358     57358     hubei          110.9700       30.8197          117       164     2012      03        09        069              0.157417       3.709473       0.812113       0.267016   -9999.000000   -9999.000000       0.047900   -9999.000000
57358     57358     hubei          110.9700       30.8197          117       164     2012      03        10        070              0.158708       4.213409       0.720465       0.265856       0.104000   -9999.000000   -9999.000000       0.156000
57358     57358     hubei          110.9700       30.8197          117       164     2012      03        11        071              0.145833       8.072601       0.000000       0.263215       0.082000       0.086600   -9999.000000   -9999.000000
57358     57358     hubei          110.9700       30.8197          117       164     2012      03        12        072              0.142458       7.967865       0.000000       0.259186   -9999.000000   -9999.000000       0.051000       0.242000
57358     57358     hubei          110.9700       30.8197          117       164     2012      03        13        073              0.140826       9.466003       0.000000       0.256023   -9999.000000   -9999.000000       0.052300   -9999.000000
57358     57358     hubei          110.9700       30.8197          117       164     2012      03        14        074              0.137708      11.936066       0.892528       0.252646       0.080000       0.117300   -9999.000000   -9999.000000
57358     57358     hubei          110.9700       30.8197          117       164     2012      03        15        075              0.134625      11.842743       0.187450       0.253032       0.094500   -9999.000000       0.053200       0.183000
57358     57358     hubei          110.9700       30.8197          117       164     2012      03        16        076              0.134348       9.467529       0.000000       0.256397       0.087000       0.048600   -9999.000000   -9999.000000
57358     57358     hubei          110.9700       30.8197          117       164     2012      03        17        077              0.136250       9.642853       0.000000       0.255374   -9999.000000   -9999.000000   -9999.000000       0.432000
57358     57358     hubei          110.9700       30.8197          117       164     2012      03        18        078              0.135750      14.003204       0.241386       0.251890       0.082000   -9999.000000       0.052700   -9999.000000
57358     57358     hubei          110.9700       30.8197          117       164     2012      03        19        079              0.128750      16.082062       0.305772       0.247797       0.092500       0.111900       0.063300       0.275000
57358     57358     hubei          110.9700       30.8197          117       164     2012      03        20        080              0.127917      10.073669       0.161367       0.250842       0.090000   -9999.000000       0.066800       0.168000
57358     57358     hubei          110.9700       30.8197          117       164     2012      03        21        081              0.127667       8.180237      13.115114       0.251445       0.121500       0.098700   -9999.000000   -9999.000000
57358     57358     hubei          110.9700       30.8197          117       164     2012      03        22        082              0.164708       8.075439       6.295713       0.263985       0.136000   -9999.000000   -9999.000000       0.601000
57358     57358     hubei          110.9700       30.8197          117       164     2012      03        23        083              0.157500       7.701050       1.168739       0.294576   -9999.000000   -9999.000000       0.058600   -9999.000000
57358     57358     hubei          110.9700       30.8197          117       164     2012      03        24        084              0.153792      11.577728       0.000000       0.273906       0.108000       0.159800       0.058900       0.422000
57358     57358     hubei          110.9700       30.8197          117       164     2012      03        25        085              0.000000      13.820129       0.000000       0.263604       0.099500   -9999.000000       0.057900   -9999.000000
57358     57358     hubei          110.9700       30.8197          117       164     2012      03        26        086              0.141375      15.492462       0.000000       0.256961       0.099000   -9999.000000       0.072300   -9999.000000
57358     57358     hubei          110.9700       30.8197          117       164     2012      03        27        087              0.136250      16.829681       0.000000       0.251817       0.094000       0.071100   -9999.000000       0.683000
57358     57358     hubei          110.9700       30.8197          117       164     2012      03        28        088              0.133250      17.077576       3.541988       0.249363   -9999.000000   -9999.000000   -9999.000000   -9999.000000
57358     57358     hubei          110.9700       30.8197          117       164     2012      03        29        089              0.151500      14.548401      11.958252       0.260591   -9999.000000       0.068500       0.077100       0.708000
57358     57358     hubei          110.9700       30.8197          117       164     2012      03        30        090              0.166542      15.990997       1.037745       0.281608       0.108500   -9999.000000       0.074800   -9999.000000
57358     57358     hubei          110.9700       30.8197          117       164     2012      03        31        091              0.157458      13.754242       0.000000       0.280331       0.100000   -9999.000000       0.074700   -9999.000000
57358     57358     hubei          110.9700       30.8197          117       164     2012      04        01        092              0.151417      16.286652       0.000000       0.264915       0.100000       0.027700       0.072500       0.541000
57358     57358     hubei          110.9700       30.8197          117       164     2012      04        02        093              0.145208      18.193695       0.246515       0.256679   -9999.000000   -9999.000000   -9999.000000   -9999.000000
57358     57358     hubei          110.9700       30.8197          117       164     2012      04        03        094              0.136917      18.905151       0.279317       0.252610       0.118000   -9999.000000       0.046500       0.384000
57358     57358     hubei          110.9700       30.8197          117       164     2012      04        04        095              0.148708      14.302979       4.951138       0.254083       0.112500   -9999.000000       0.060400   -9999.000000
57358     57358     hubei          110.9700       30.8197          117       164     2012      04        05        096              0.149042      13.241028       0.068761       0.272055       0.107000   -9999.000000       0.056500       0.494000
57358     57358     hubei          110.9700       30.8197          117       164     2012      04        06        097              0.144875      16.227020       0.390875       0.259146       0.104000       0.076400       0.055600       0.483000
57358     57358     hubei          110.9700       30.8197          117       164     2012      04        07        098              0.139750      17.422028       0.163363       0.253930   -9999.000000   -9999.000000   -9999.000000   -9999.000000
57358     57358     hubei          110.9700       30.8197          117       164     2012      04        08        099              0.135542      17.104431       2.236585       0.251604   -9999.000000       0.099500   -9999.000000       0.425000
57358     57358     hubei          110.9700       30.8197          117       164     2012      04        09        100              0.136042      16.667297       0.370709       0.253219       0.114000   -9999.000000       0.076100   -9999.000000
57358     57358     hubei          110.9700       30.8197          117       164     2012      04        10        101              0.136000      16.171173       1.004662       0.259487       0.110000   -9999.000000       0.075400       0.498000
57358     57358     hubei          110.9700       30.8197          117       164     2012      04        11        102              0.134417      17.262573       0.282633       0.257847       0.131000   -9999.000000       0.074100   -9999.000000
57358     57358     hubei          110.9700       30.8197          117       164     2012      04        12        103              0.166333      17.696808      21.375175       0.253886   -9999.000000   -9999.000000       0.087600   -9999.000000
57358     57358     hubei          110.9700       30.8197          117       164     2012      04        13        104              0.158917      14.452606       0.243873       0.303637   -9999.000000       0.194300   -9999.000000       0.452000
57358     57358     hubei          110.9700       30.8197          117       164     2012      04        14        105              0.154750      14.028015       0.360721       0.277422       0.139000       0.124900   -9999.000000   -9999.000000
57358     57358     hubei          110.9700       30.8197          117       164     2012      04        15        106              0.149167      14.821991       0.085178       0.270326       0.136000   -9999.000000       0.079600       0.530000
57358     57358     hubei          110.9700       30.8197          117       164     2012      04        16        107              0.146875      13.830048       0.086661       0.265495       0.121500       0.225800       0.100600   -9999.000000
57358     57358     hubei          110.9700       30.8197          117       164     2012      04        17        108              0.142042      16.505646       0.109614       0.260164       0.146000       0.182800       0.112400       0.320000
57358     57358     hubei          110.9700       30.8197          117       164     2012      04        18        109              0.141708      14.648712       0.000000       0.258784   -9999.000000   -9999.000000   -9999.000000       0.329000
57358     57358     hubei          110.9700       30.8197          117       164     2012      04        19        110              0.136292      18.787598       0.317419       0.253516   -9999.000000       0.037600   -9999.000000   -9999.000000
57358     57358     hubei          110.9700       30.8197          117       164     2012      04        20        111              0.141000      20.672455       3.082958       0.248950       0.137000   -9999.000000       0.104900       0.533000
57358     57358     hubei          110.9700       30.8197          117       164     2012      04        21        112              0.142792      17.057770       0.110352       0.264395       0.173000   -9999.000000       0.103500   -9999.000000
57358     57358     hubei          110.9700       30.8197          117       164     2012      04        22        113              0.135917      20.373688       5.027833       0.252383       0.167000   -9999.000000       0.105300       0.381000
57358     57358     hubei          110.9700       30.8197          117       164     2012      04        23        114              0.131792      21.018524      16.589504       0.267061   -9999.000000   -9999.000000       0.163800   -9999.000000
57358     57358     hubei          110.9700       30.8197          117       164     2012      04        24        115              0.136500      19.385315       3.957910       0.300189       0.198000       0.115000   -9999.000000   -9999.000000
57358     57358     hubei          110.9700       30.8197          117       164     2012      04        25        116              0.000000      19.456177       2.674121       0.284785       0.167000   -9999.000000   -9999.000000       0.478000
57358     57358     hubei          110.9700       30.8197          117       164     2012      04        26        117              0.131958      19.154968       0.000000       0.276453       0.159000       0.209200       0.153000   -9999.000000
57358     57358     hubei          110.9700       30.8197          117       164     2012      04        27        118              0.126792      20.012909       1.869034       0.263420       0.155500   -9999.000000       0.144400       0.390000
57358     57358     hubei          110.9700       30.8197          117       164     2012      04        28        119              0.138708      21.640686      12.084374       0.255838   -9999.000000   -9999.000000       0.164800   -9999.000000
57358     57358     hubei          110.9700       30.8197          117       164     2012      04        29        120              0.159542      18.991394       0.864844       0.285963   -9999.000000       0.219800       0.163900   -9999.000000
57358     57358     hubei          110.9700       30.8197          117       164     2012      04        30        121              0.166917      18.116302       8.395605       0.277435       0.195000   -9999.000000   -9999.000000       1.000000
57358     57358     hubei          110.9700       30.8197          117       164     2012      05        01        122              0.164875      17.677155       1.888500       0.289978       0.218000   -9999.000000   -9999.000000   -9999.000000
57358     57358     hubei          110.9700       30.8197          117       164     2012      05        02        123              0.160000      18.426300       2.662974       0.278383       0.209500       0.182900       0.097100       0.842000
57358     57358     hubei          110.9700       30.8197          117       164     2012      05        03        124              0.160708      19.868896       1.395685       0.274778       0.199000   -9999.000000       0.099300   -9999.000000
57358     57358     hubei          110.9700       30.8197          117       164     2012      05        04        125              0.153458      18.587219       0.000000       0.274383   -9999.000000       0.090200       0.097400       0.628000
57358     57358     hubei          110.9700       30.8197          117       164     2012      05        05        126              0.142458      20.239471       0.000000       0.265884       0.190000   -9999.000000   -9999.000000       0.513000
57358     57358     hubei          110.9700       30.8197          117       164     2012      05        06        127              0.133958      22.732971       0.000000       0.258173       0.181000   -9999.000000   -9999.000000   -9999.000000
57358     57358     hubei          110.9700       30.8197          117       164     2012      05        07        128              0.130208      23.094940       2.218078       0.254425   -9999.000000       0.110300       0.069100       0.759000
57358     57358     hubei          110.9700       30.8197          117       164     2012      05        08        129              0.132208      22.051239       1.666839       0.260867       0.172000   -9999.000000       0.067300   -9999.000000
57358     57358     hubei          110.9700       30.8197          117       164     2012      05        09        130              0.136000      21.891693       0.250604       0.264243   -9999.000000   -9999.000000       0.065400       0.597000
57358     57358     hubei          110.9700       30.8197          117       164     2012      05        10        131              0.129125      22.286224       0.000000       0.258444       0.190000   -9999.000000       0.059100   -9999.000000
57358     57358     hubei          110.9700       30.8197          117       164     2012      05        11        132              0.125250      23.321075       2.846205       0.252222       0.216500   -9999.000000   -9999.000000   -9999.000000
57358     57358     hubei          110.9700       30.8197          117       164     2012      05        12        133              0.155750      22.786804       8.100993       0.258884       0.241000       0.179800   -9999.000000       0.771000
57358     57358     hubei          110.9700       30.8197          117       164     2012      05        13        134              0.171125      19.850769      18.007032       0.279587       0.234000   -9999.000000       0.059700   -9999.000000
57358     57358     hubei          110.9700       30.8197          117       164     2012      05        14        135              0.167917      18.942841       2.772512       0.298100   -9999.000000       0.218600       0.051800       0.587000
57358     57358     hubei          110.9700       30.8197          117       164     2012      05        15        136              0.155583      18.700958       0.000000       0.290624       0.206000   -9999.000000       0.051100   -9999.000000
57358     57358     hubei          110.9700       30.8197          117       164     2012      05        16        137              0.144333      20.695129       0.349943       0.273523       0.165500   -9999.000000       0.048200       0.233000
57358     57358     hubei          110.9700       30.8197          117       164     2012      05        17        138              0.134250      21.707428       0.000000       0.264879       0.179000       0.195500   -9999.000000       0.486000
57358     57358     hubei          110.9700       30.8197          117       164     2012      05        18        139              0.140375      22.800507       5.556206       0.257356       0.231000   -9999.000000   -9999.000000   -9999.000000
57358     57358     hubei          110.9700       30.8197          117       164     2012      05        19        140              0.146875      19.111389       0.000000       0.274585       0.173000       0.115200       0.049800       0.530000
57358     57358     hubei          110.9700       30.8197          117       164     2012      05        20        141              0.134792      22.972107       0.000000       0.261226   -9999.000000       0.238200       0.048200   -9999.000000
57358     57358     hubei          110.9700       30.8197          117       164     2012      05        21        142              0.127125      23.362915       0.438159       0.252659       0.295000   -9999.000000       0.091500       0.283000
57358     57358     hubei          110.9700       30.8197          117       164     2012      05        22        143              0.127500      21.815582       2.184810       0.251499       0.355000       0.233400   -9999.000000   -9999.000000
57358     57358     hubei          110.9700       30.8197          117       164     2012      05        23        144              0.160500      19.732666       5.881847       0.261567   -9999.000000   -9999.000000   -9999.000000   -9999.000000
57358     57358     hubei          110.9700       30.8197          117       164     2012      05        24        145              0.170250      18.232300       6.174049       0.276488       0.386000   -9999.000000       0.098700       0.799000
57358     57358     hubei          110.9700       30.8197          117       164     2012      05        25        146              0.000000      17.869080       0.509042       0.282671   -9999.000000       0.138300       0.096100   -9999.000000
57358     57358     hubei          110.9700       30.8197          117       164     2012      05        26        147              0.157375      17.919281       0.000000       0.271722       0.311000   -9999.000000       0.088300       0.374000
57358     57358     hubei          110.9700       30.8197          117       164     2012      05        27        148              0.129208      21.748016       0.388715       0.261649       0.292000   -9999.000000       0.093000   -9999.000000
57358     57358     hubei          110.9700       30.8197          117       164     2012      05        28        149              0.146708      21.938782      27.782364       0.258295       0.330000   -9999.000000   -9999.000000   -9999.000000
57358     57358     hubei          110.9700       30.8197          117       164     2012      05        29        150              0.164250      21.245331      23.933376       0.293912   -9999.000000   -9999.000000   -9999.000000       0.708000
57358     57358     hubei          110.9700       30.8197          117       164     2012      05        30        151              0.136167      19.764069       0.000000       0.317781   -9999.000000       0.053500       0.090900   -9999.000000
57358     57358     hubei          110.9700       30.8197          117       164     2012      05        31        152              0.134417      22.652344       3.361454       0.283259       0.328000   -9999.000000       0.089100   -9999.000000
57358     57358     hubei          110.9700       30.8197          117       164     2012      06        01        153              0.149750      21.863983       4.570752       0.279217       0.237000       0.172100       0.092600   -9999.000000
57358     57358     hubei          110.9700       30.8197          117       164     2012      06        02        154              0.131917      19.786255       0.000000       0.290203       0.208500   -9999.000000       0.083500       0.520000
57358     57358     hubei          110.9700       30.8197          117       164     2012      06        03        155              0.129458      22.236115       2.402354       0.273421   -9999.000000   -9999.000000   -9999.000000       0.454000
57358     57358     hubei          110.9700       30.8197          117       164     2012      06        04        156              0.130875      21.140442       0.145668       0.275056   -9999.000000       0.169800   -9999.000000   -9999.000000
57358     57358     hubei          110.9700       30.8197          117       164     2012      06        05        157              0.143000      22.144501       2.030833       0.271658   -9999.000000       0.187100       0.078100       0.791000
57358     57358     hubei          110.9700       30.8197          117       164     2012      06        06        158              0.138917      21.711670       0.116446       0.273162       0.213500       0.100800       0.079600   -9999.000000
57358     57358     hubei          110.9700       30.8197          117       164     2012      06        07        159              0.126708      23.761505       0.000000       0.268053       0.222500   -9999.000000       0.081600       0.645000
57358     57358     hubei          110.9700       30.8197          117       164     2012      06        08        160              0.120500      23.613281       0.000000       0.265062       0.196500   -9999.000000   -9999.000000   -9999.000000
57358     57358     hubei          110.9700       30.8197          117       164     2012      06        09        161              0.115500      25.017670       0.364893       0.260945       0.198000       0.197600   -9999.000000   -9999.000000
57358     57358     hubei          110.9700       30.8197          117       164     2012      06        10        162              0.114917      25.515198       1.522560       0.258268   -9999.000000       0.142700       0.077400       0.579000
57358     57358     hubei          110.9700       30.8197          117       164     2012      06        11        163              0.000000      23.739624       0.000000       0.264211       0.216000   -9999.000000       0.147400   -9999.000000
57358     57358     hubei          110.9700       30.8197          117       164     2012      06        12        164              0.109250      25.077240       1.054330       0.258050       0.203000       0.262900       0.140700       0.603000
57358     57358     hubei          110.9700       30.8197          117       164     2012      06        13        165              0.105000      26.218414       0.000000       0.252634       0.195500   -9999.000000       0.139100   -9999.000000
57358     57358     hubei          110.9700       30.8197          117       164     2012      06        14        166              0.103375      26.430176       0.357683       0.247258   -9999.000000   -9999.000000   -9999.000000       0.345000
57358     57358     hubei          110.9700       30.8197          117       164     2012      06        15        167              0.102750      23.983887       0.000000       0.250136   -9999.000000   -9999.000000   -9999.000000       0.437000
57358     57358     hubei          110.9700       30.8197          117       164     2012      06        16        168              0.100333      25.429688       0.343607       0.244522       0.190000   -9999.000000       0.136100   -9999.000000
57358     57358     hubei          110.9700       30.8197          117       164     2012      06        17        169              0.098583      25.279327       0.914684       0.240307       0.205000       0.157300       0.143600       0.595000
57358     57358     hubei          110.9700       30.8197          117       164     2012      06        18        170              0.097333      25.038422       0.078019       0.237040       0.193500   -9999.000000       0.123600   -9999.000000
57358     57358     hubei          110.9700       30.8197          117       164     2012      06        19        171              0.095917      25.426422       0.403648       0.235179       0.187000   -9999.000000       0.108800       0.466000
57358     57358     hubei          110.9700       30.8197          117       164     2012      06        20        172              0.094583      26.652069       0.000000       0.232652   -9999.000000   -9999.000000   -9999.000000   -9999.000000
57358     57358     hubei          110.9700       30.8197          117       164     2012      06        21        173              0.094458      26.793549       2.637042       0.229643       0.227000   -9999.000000   -9999.000000   -9999.000000
57358     57358     hubei          110.9700       30.8197          117       164     2012      06        22        174              0.093792      26.729370       1.558171       0.238859       0.207000       0.247400       0.126300       0.550000
57358     57358     hubei          110.9700       30.8197          117       164     2012      06        23        175              0.092542      26.614136       0.000000       0.235466       0.221500   -9999.000000       0.128000   -9999.000000
57358     57358     hubei          110.9700       30.8197          117       164     2012      06        24        176              0.091292      27.612030       0.000000       0.228938       0.225500   -9999.000000       0.123200       0.329000
57358     57358     hubei          110.9700       30.8197          117       164     2012      06        25        177              0.093250      27.650757       7.720935       0.225165   -9999.000000       0.060600   -9999.000000   -9999.000000
57358     57358     hubei          110.9700       30.8197          117       164     2012      06        26        178              0.152208      26.219482      14.095631       0.241782   -9999.000000   -9999.000000   -9999.000000   -9999.000000
57358     57358     hubei          110.9700       30.8197          117       164     2012      06        27        179              0.145583      24.394470       2.153393       0.291773       0.303000   -9999.000000       0.100200       1.000000
57358     57358     hubei          110.9700       30.8197          117       164     2012      06        28        180              0.146125      24.414795       0.663857       0.274617       0.268000       0.136100       0.101400   -9999.000000
57358     57358     hubei          110.9700       30.8197          117       164     2012      06        29        181              0.136500      24.800507       5.075072       0.267354       0.230000   -9999.000000       0.089100       0.810000
57358     57358     hubei          110.9700       30.8197          117       164     2012      06        30        182              0.137333      27.167480       4.077839       0.266685       0.242000       0.073900       0.095500   -9999.000000
57358     57358     hubei          110.9700       30.8197          117       164     2012      07        01        183              0.131227      26.078766       2.056887       0.278947   -9999.000000   -9999.000000   -9999.000000       0.904000
57358     57358     hubei          110.9700       30.8197          117       164     2012      07        02        184              0.118625      25.931305       0.000000       0.272615       0.223000   -9999.000000   -9999.000000       0.561000
57358     57358     hubei          110.9700       30.8197          117       164     2012      07        03        185              0.108375      28.386200       9.774439       0.260144       0.228000   -9999.000000       0.147400   -9999.000000
57358     57358     hubei          110.9700       30.8197          117       164     2012      07        04        186              0.111667      27.992188      15.056283       0.253758       0.218000   -9999.000000       0.092300       0.909000
57358     57358     hubei          110.9700       30.8197          117       164     2012      07        05        187              0.160542      28.001099      22.199844       0.266035       0.249000       0.195500       0.161100   -9999.000000
57358     57358     hubei          110.9700       30.8197          117       164     2012      07        06        188              0.149125      26.611969       0.313035       0.310064   -9999.000000   -9999.000000   -9999.000000       0.857000
57358     57358     hubei          110.9700       30.8197          117       164     2012      07        07        189              0.127792      27.140472       0.775505       0.282251   -9999.000000   -9999.000000   -9999.000000   -9999.000000
57358     57358     hubei          110.9700       30.8197          117       164     2012      07        08        190              0.114625      28.793579       0.000000       0.270758       0.220500   -9999.000000       0.146200   -9999.000000
57358     57358     hubei          110.9700       30.8197          117       164     2012      07        09        191              0.105667      29.551575       0.000000       0.261424       0.212000   -9999.000000       0.094300       0.496000
57358     57358     hubei          110.9700       30.8197          117       164     2012      07        10        192              0.101208      29.872742       1.085339       0.254027       0.205000       0.167400       0.097200   -9999.000000
57358     57358     hubei          110.9700       30.8197          117       164     2012      07        11        193              0.140417      28.966461       7.814495       0.253573   -9999.000000   -9999.000000       0.096300       0.731000
57358     57358     hubei          110.9700       30.8197          117       164     2012      07        12        194              0.152750      28.348297       7.400743       0.277084   -9999.000000       0.044500   -9999.000000   -9999.000000
57358     57358     hubei          110.9700       30.8197          117       164     2012      07        13        195              0.165783      25.991455       6.512487       0.281838       0.355000       0.107200   -9999.000000       0.728000
57358     57358     hubei          110.9700       30.8197          117       164     2012      07        14        196              0.136708      25.004791       1.611853       0.287079       0.305500   -9999.000000       0.090700       0.693000
57358     57358     hubei          110.9700       30.8197          117       164     2012      07        15        197              0.125875      26.965149       0.445598       0.273650       0.321000       0.122200       0.093300   -9999.000000
57358     57358     hubei          110.9700       30.8197          117       164     2012      07        16        198              0.122917      26.315094       0.940034       0.268087       0.306000   -9999.000000       0.078700       0.633000
57358     57358     hubei          110.9700       30.8197          117       164     2012      07        17        199              0.118208      26.135284       1.109647       0.265117   -9999.000000   -9999.000000       0.077400   -9999.000000
57358     57358     hubei          110.9700       30.8197          117       164     2012      07        18        200              0.115292      26.190826       0.974564       0.260374       0.334000       0.130300   -9999.000000       0.482000
57358     57358     hubei          110.9700       30.8197          117       164     2012      07        19        201              0.119083      26.186951       0.347549       0.257935       0.334000   -9999.000000   -9999.000000   -9999.000000
57358     57358     hubei          110.9700       30.8197          117       164     2012      07        20        202              0.121833      26.335907       5.926091       0.256841       0.314000       0.113300       0.075300   -9999.000000
57358     57358     hubei          110.9700       30.8197          117       164     2012      07        21        203              0.124087      27.697357       1.751571       0.270320       0.298000   -9999.000000       0.073300       0.687000
57358     57358     hubei          110.9700       30.8197          117       164     2012      07        22        204              0.110750      28.707855       2.873514       0.265836   -9999.000000   -9999.000000       0.076300   -9999.000000
57358     57358     hubei          110.9700       30.8197          117       164     2012      07        23        205              0.098167      28.380829      15.660351       0.265363   -9999.000000       0.148600   -9999.000000       0.862000
57358     57358     hubei          110.9700       30.8197          117       164     2012      07        24        206              0.096417      28.635071      14.368200       0.280679       0.327000   -9999.000000   -9999.000000   -9999.000000
57358     57358     hubei          110.9700       30.8197          117       164     2012      07        25        207              0.090917      27.833130       0.856733       0.298328       0.319000       0.086300       0.110500   -9999.000000
57358     57358     hubei          110.9700       30.8197          117       164     2012      07        26        208              0.101958      28.436676       0.000000       0.286171       0.300500   -9999.000000       0.105100       0.742000
57358     57358     hubei          110.9700       30.8197          117       164     2012      07        27        209              0.119333      28.866577       3.786644       0.269073       0.252000   -9999.000000       0.103500   -9999.000000
57358     57358     hubei          110.9700       30.8197          117       164     2012      07        28        210              0.120292      28.825104       0.438699       0.268627   -9999.000000       0.200900       0.106900       0.505000
57358     57358     hubei          110.9700       30.8197          117       164     2012      07        29        211              0.119375      29.334564       0.260122       0.258622       0.322000   -9999.000000   -9999.000000   -9999.000000
57358     57358     hubei          110.9700       30.8197          117       164     2012      07        30        212              0.135417      29.642151       2.133416       0.253179       0.331000   -9999.000000   -9999.000000       0.700000
57358     57358     hubei          110.9700       30.8197          117       164     2012      07        31        213              0.153042      29.027100       1.954922       0.255568       0.323000       0.102200       0.122100       0.562000
57358     57358     hubei          110.9700       30.8197          117       164     2012      08        01        214              0.142833      29.617859       1.387323       0.255376       0.318000   -9999.000000       0.128700   -9999.000000
57358     57358     hubei          110.9700       30.8197          117       164     2012      08        02        215              0.134708      29.402100       0.000000       0.253535   -9999.000000       0.119800       0.118800       0.579000
57358     57358     hubei          110.9700       30.8197          117       164     2012      08        03        216              0.129667      28.592407       0.000000       0.244987       0.339000       0.027600       0.122400   -9999.000000
57358     57358     hubei          110.9700       30.8197          117       164     2012      08        04        217              0.127292      28.842529       4.338735       0.238383       0.390500       0.182000   -9999.000000       0.538000
57358     57358     hubei          110.9700       30.8197          117       164     2012      08        05        218              0.184958      28.393890      29.120108       0.241494       0.423000       0.123200   -9999.000000   -9999.000000
57358     57358     hubei          110.9700       30.8197          117       164     2012      08        06        219              0.181292      25.922791       5.857257       0.311926   -9999.000000   -9999.000000       0.127600   -9999.000000
57358     57358     hubei          110.9700       30.8197          117       164     2012      08        07        220              0.161792      27.040527       0.000000       0.294316   -9999.000000       0.092100       0.123900       0.522000
57358     57358     hubei          110.9700       30.8197          117       164     2012      08        08        221              0.149708      27.770599       0.000000       0.272990   -9999.000000   -9999.000000       0.122000   -9999.000000
57358     57358     hubei          110.9700       30.8197          117       164     2012      08        09        222              0.142500      27.918732       0.000000       0.262444       0.349000   -9999.000000   -9999.000000       0.596000
57358     57358     hubei          110.9700       30.8197          117       164     2012      08        10        223              0.137750      27.486115       0.000000       0.254710       0.334500       0.116400   -9999.000000   -9999.000000
57358     57358     hubei          110.9700       30.8197          117       164     2012      08        11        224              0.133917      28.000092       0.000000       0.249810       0.309500   -9999.000000       0.118900       0.556000
57358     57358     hubei          110.9700       30.8197          117       164     2012      08        12        225              0.130417      28.656494       0.000000       0.245728       0.265000       0.103400       0.127500       0.442000
57358     57358     hubei          110.9700       30.8197          117       164     2012      08        13        226              0.127500      29.236847       1.442225       0.241306   -9999.000000   -9999.000000       0.121300   -9999.000000
57358     57358     hubei          110.9700       30.8197          117       164     2012      08        14        227              0.125708      28.723663       0.085945       0.244220       0.349000   -9999.000000       0.119700       0.666000
57358     57358     hubei          110.9700       30.8197          117       164     2012      08        15        228              0.124208      28.544769       0.435176       0.240655       0.368500       0.133600   -9999.000000   -9999.000000
57358     57358     hubei          110.9700       30.8197          117       164     2012      08        16        229              0.124208      27.348846       1.332215       0.242956       0.351500   -9999.000000   -9999.000000       0.449000
57358     57358     hubei          110.9700       30.8197          117       164     2012      08        17        230              0.123667      27.640198       0.000000       0.241651       0.282000   -9999.000000       0.112900   -9999.000000
57358     57358     hubei          110.9700       30.8197          117       164     2012      08        18        231              0.121875      29.015961       3.374212       0.235430   -9999.000000       0.099000       0.105000   -9999.000000
57358     57358     hubei          110.9700       30.8197          117       164     2012      08        19        232              0.136458      29.341980      12.412619       0.243940       0.328000   -9999.000000       0.117400       0.728000
57358     57358     hubei          110.9700       30.8197          117       164     2012      08        20        233              0.176458      28.867279      16.567867       0.269844   -9999.000000       0.144600       0.139900   -9999.000000
57358     57358     hubei          110.9700       30.8197          117       164     2012      08        21        234              0.173333      27.922607       2.372766       0.293520       0.309000   -9999.000000   -9999.000000       1.000000
57358     57358     hubei          110.9700       30.8197          117       164     2012      08        22        235              0.156458      24.958099       0.000000       0.286245       0.284000   -9999.000000   -9999.000000   -9999.000000
57358     57358     hubei          110.9700       30.8197          117       164     2012      08        23        236              0.145208      23.983978       0.000000       0.269758       0.234000       0.132600       0.150100   -9999.000000
57358     57358     hubei          110.9700       30.8197          117       164     2012      08        24        237              0.139500      23.678619       0.000000       0.259808   -9999.000000   -9999.000000       0.150400       0.593000
57358     57358     hubei          110.9700       30.8197          117       164     2012      08        25        238              0.000000      24.614288       0.000000       0.252634   -9999.000000   -9999.000000       0.142800   -9999.000000
57358     57358     hubei          110.9700       30.8197          117       164     2012      08        26        239              0.130833      25.037750       1.354850       0.247831       0.280500       0.212600   -9999.000000       0.475000
57358     57358     hubei          110.9700       30.8197          117       164     2012      08        27        240              0.130167      23.686096       0.000000       0.253712       0.269000   -9999.000000   -9999.000000   -9999.000000
57358     57358     hubei          110.9700       30.8197          117       164     2012      08        28        241              0.127458      25.645844       0.000000       0.246146       0.244000       0.051900       0.145000   -9999.000000
57358     57358     hubei          110.9700       30.8197          117       164     2012      08        29        242              0.125083      26.633850       0.000000       0.241178   -9999.000000   -9999.000000       0.146400       0.524000
57358     57358     hubei          110.9700       30.8197          117       164     2012      08        30        243              0.122625      27.599213       1.073242       0.236613       0.290000       0.071700       0.140200   -9999.000000
57358     57358     hubei          110.9700       30.8197          117       164     2012      08        31        244              0.126958      27.286774       4.021278       0.234768       0.305000   -9999.000000       0.146300       0.668000
57358     57358     hubei          110.9700       30.8197          117       164     2012      09        01        245              0.156750      26.319489       3.824024       0.249267       0.256000   -9999.000000   -9999.000000   -9999.000000
57358     57358     hubei          110.9700       30.8197          117       164     2012      09        02        246              0.182833      26.773560      12.883445       0.258633       0.259000       0.257300   -9999.000000       0.889000
57358     57358     hubei          110.9700       30.8197          117       164     2012      09        03        247              0.159875      24.111420       0.000000       0.291252       0.212000   -9999.000000       0.199400   -9999.000000
57358     57358     hubei          110.9700       30.8197          117       164     2012      09        04        248              0.147292      25.004944       0.384891       0.265151   -9999.000000       0.043700       0.204000   -9999.000000
57358     57358     hubei          110.9700       30.8197          117       164     2012      09        05        249              0.140917      24.496185       0.000000       0.256542       0.248000       0.148400       0.201900       0.283000
57358     57358     hubei          110.9700       30.8197          117       164     2012      09        06        250              0.136000      25.109680       0.136819       0.249298       0.261000   -9999.000000       0.189600   -9999.000000
57358     57358     hubei          110.9700       30.8197          117       164     2012      09        07        251              0.132583      25.364655       1.529246       0.245178       0.258500       0.120300   -9999.000000       0.472000
57358     57358     hubei          110.9700       30.8197          117       164     2012      09        08        252              0.159500      26.012177      26.004946       0.243210   -9999.000000       0.197600       0.221300   -9999.000000
57358     57358     hubei          110.9700       30.8197          117       164     2012      09        09        253              0.167000      24.911621       0.000000       0.290561   -9999.000000       0.100600       0.214800       0.321000
57358     57358     hubei          110.9700       30.8197          117       164     2012      09        10        254              0.154417      24.311523       0.230157       0.281939       0.278000       0.291000       0.226200       0.500000
57358     57358     hubei          110.9700       30.8197          117       164     2012      09        11        255              0.172708      23.255707      42.160469       0.270542       0.287000   -9999.000000       0.241800   -9999.000000
57358     57358     hubei          110.9700       30.8197          117       164     2012      09        12        256              0.192333      23.396057      16.810987       0.306537       0.282000       0.324900   -9999.000000       0.871000
57358     57358     hubei          110.9700       30.8197          117       164     2012      09        13        257              0.166087      20.910095       0.000000       0.317968       0.224000   -9999.000000   -9999.000000   -9999.000000
57358     57358     hubei          110.9700       30.8197          117       164     2012      09        14        258              0.153000      22.067505       0.000000       0.286291   -9999.000000   -9999.000000       0.229900       0.278000
57358     57358     hubei          110.9700       30.8197          117       164     2012      09        15        259              0.145042      21.881775       0.000000       0.275119       0.236000       0.025300       0.229700   -9999.000000
57358     57358     hubei          110.9700       30.8197          117       164     2012      09        16        260              0.139250      21.578674       0.000000       0.268668       0.223000   -9999.000000       0.229100   -9999.000000
57358     57358     hubei          110.9700       30.8197          117       164     2012      09        17        261              0.136292      20.609253       0.000000       0.266316       0.226500   -9999.000000       0.180800       0.618000
57358     57358     hubei          110.9700       30.8197          117       164     2012      09        18        262              0.132792      21.808044       0.000000       0.262055       0.218000       0.028200   -9999.000000   -9999.000000
57358     57358     hubei          110.9700       30.8197          117       164     2012      09        19        263              0.130833      22.134369       0.000000       0.259992       0.209000   -9999.000000   -9999.000000       0.274000
57358     57358     hubei          110.9700       30.8197          117       164     2012      09        20        264              0.134708      23.241608       1.954171       0.256877   -9999.000000       0.088900       0.208700   -9999.000000
57358     57358     hubei          110.9700       30.8197          117       164     2012      09        21        265              0.167125      23.326599       0.296438       0.258216   -9999.000000   -9999.000000       0.201600   -9999.000000
57358     57358     hubei          110.9700       30.8197          117       164     2012      09        22        266              0.154208      21.710480       0.234009       0.262822       0.226000       0.058100       0.198000       0.507000
57358     57358     hubei          110.9700       30.8197          117       164     2012      09        23        267              0.145833      23.126434       0.493254       0.257670       0.239500   -9999.000000   -9999.000000   -9999.000000
57358     57358     hubei          110.9700       30.8197          117       164     2012      09        24        268              0.140792      21.944519       0.207538       0.259266       0.201000   -9999.000000   -9999.000000       0.311000
57358     57358     hubei          110.9700       30.8197          117       164     2012      09        25        269              0.143500      22.188110       3.768168       0.256717   -9999.000000       0.104900       0.223100   -9999.000000
57358     57358     hubei          110.9700       30.8197          117       164     2012      09        26        270              0.169333      21.505707       1.130404       0.264800       0.236000   -9999.000000       0.224000       0.632000
57358     57358     hubei          110.9700       30.8197          117       164     2012      09        27        271              0.164500      21.419128       0.000000       0.268381       0.205000       0.207300       0.217400       0.458000
57358     57358     hubei          110.9700       30.8197          117       164     2012      09        28        272              0.142938      22.867950       0.000000       0.259598       0.209000   -9999.000000       0.202800   -9999.000000
57358     57358     hubei          110.9700       30.8197          117       164     2012      09        29        273              0.138500      21.835144       1.330269       0.253716       0.196000   -9999.000000   -9999.000000       0.208000
57358     57358     hubei          110.9700       30.8197          117       164     2012      09        30        274              0.132833      20.471497       0.017070       0.250269       0.219000   -9999.000000   -9999.000000   -9999.000000
57358     57358     hubei          110.9700       30.8197          117       164     2012      10        01        275              0.131292      19.132568       0.000000       0.250631   -9999.000000       0.322200       0.186200       0.385000
57358     57358     hubei          110.9700       30.8197          117       164     2012      10        02        276              0.130167      19.616241       1.398036       0.247317       0.210000   -9999.000000       0.195400   -9999.000000
57358     57358     hubei          110.9700       30.8197          117       164     2012      10        03        277              0.130750      19.949554       0.144979       0.250131       0.199500       0.035000       0.193200   -9999.000000
57358     57358     hubei          110.9700       30.8197          117       164     2012      10        04        278              0.133708      19.259247       5.126607       0.252310       0.221500   -9999.000000       0.182000       0.330000
57358     57358     hubei          110.9700       30.8197          117       164     2012      10        05        279              0.180458      19.141296       7.299134       0.257221   -9999.000000   -9999.000000   -9999.000000   -9999.000000
57358     57358     hubei          110.9700       30.8197          117       164     2012      10        06        280              0.171125      17.832703       3.080282       0.285027   -9999.000000       0.121000   -9999.000000       0.734000
57358     57358     hubei          110.9700       30.8197          117       164     2012      10        07        281              0.181417      18.673920       4.374011       0.272165       0.222000   -9999.000000       0.198900   -9999.000000
57358     57358     hubei          110.9700       30.8197          117       164     2012      10        08        282              0.172208      17.526978       0.978335       0.282460       0.249500       0.209700       0.115900       0.503000
57358     57358     hubei          110.9700       30.8197          117       164     2012      10        09        283              0.164042      17.310364       0.000000       0.272631       0.203500   -9999.000000       0.119800       0.447000
57358     57358     hubei          110.9700       30.8197          117       164     2012      10        10        284              0.154417      19.500214       0.000000       0.265185       0.189000       0.211600   -9999.000000   -9999.000000
57358     57358     hubei          110.9700       30.8197          117       164     2012      10        11        285              0.147625      19.104401       0.000000       0.261433   -9999.000000   -9999.000000   -9999.000000       0.420000
57358     57358     hubei          110.9700       30.8197          117       164     2012      10        12        286              0.146792      18.473755       1.291109       0.259748       0.147000   -9999.000000       0.118100   -9999.000000
57358     57358     hubei          110.9700       30.8197          117       164     2012      10        13        287              0.150458      17.091827       0.000000       0.262735       0.135500       0.163700       0.121400       0.371000
57358     57358     hubei          110.9700       30.8197          117       164     2012      10        14        288              0.146500      17.352417       0.454584       0.261567       0.140500   -9999.000000       0.118700   -9999.000000
57358     57358     hubei          110.9700       30.8197          117       164     2012      10        15        289              0.176667      18.456665      11.742402       0.257817       0.157500       0.167200       0.214900   -9999.000000
57358     57358     hubei          110.9700       30.8197          117       164     2012      10        16        290              0.179083      16.858185       1.295732       0.286256       0.149000       0.169800   -9999.000000       0.584000
57358     57358     hubei          110.9700       30.8197          117       164     2012      10        17        291              0.163292      16.992798       0.000000       0.279787   -9999.000000   -9999.000000   -9999.000000   -9999.000000
57358     57358     hubei          110.9700       30.8197          117       164     2012      10        18        292              0.159958      17.363037       0.000000       0.266819       0.145000       0.195900       0.193700       0.190000
57358     57358     hubei          110.9700       30.8197          117       164     2012      10        19        293              0.149739      17.958618       0.000000       0.261717       0.145000       0.177200       0.200500   -9999.000000
57358     57358     hubei          110.9700       30.8197          117       164     2012      10        20        294              0.147333      18.174408       0.000000       0.259293       0.139000   -9999.000000       0.190500   -9999.000000
57358     57358     hubei          110.9700       30.8197          117       164     2012      10        21        295              0.163542      19.412506      28.105406       0.256961       0.205000       0.065900       0.184700       0.644000
57358     57358     hubei          110.9700       30.8197          117       164     2012      10        22        296              0.174583      19.652618       0.119236       0.288188   -9999.000000   -9999.000000   -9999.000000   -9999.000000
57358     57358     hubei          110.9700       30.8197          117       164     2012      10        23        297              0.166917      17.091888       0.402670       0.290656   -9999.000000   -9999.000000   -9999.000000       0.291000
57358     57358     hubei          110.9700       30.8197          117       164     2012      10        24        298              0.164417      15.669800       0.468131       0.277316   -9999.000000   -9999.000000       0.108900   -9999.000000
57358     57358     hubei          110.9700       30.8197          117       164     2012      10        25        299              0.000000      15.228210       8.113375       0.272563       0.235500   -9999.000000       0.104700       0.518000
57358     57358     hubei          110.9700       30.8197          117       164     2012      10        26        300              0.181333      15.669922       2.418465       0.279043       0.222000       0.299100       0.110900       0.752000
57358     57358     hubei          110.9700       30.8197          117       164     2012      10        27        301              0.168208      16.155151       0.000000       0.287607       0.210000   -9999.000000   -9999.000000   -9999.000000
57358     57358     hubei          110.9700       30.8197          117       164     2012      10        28        302              0.000000      17.565399       8.368255       0.274107   -9999.000000       0.171500   -9999.000000       0.319000
57358     57358     hubei          110.9700       30.8197          117       164     2012      10        29        303              0.189417      18.135620      12.341321       0.277919       0.223000   -9999.000000       0.152700   -9999.000000
57358     57358     hubei          110.9700       30.8197          117       164     2012      10        30        304              0.169875      16.040100       0.000000       0.302079       0.207000   -9999.000000       0.162000       0.481000
57358     57358     hubei          110.9700       30.8197          117       164     2012      10        31        305              0.166292      16.255798       0.510748       0.280196       0.208000       0.153200       0.157700   -9999.000000
57358     57358     hubei          110.9700       30.8197          117       164     2012      11        01        306              0.158250      16.050049       0.000000       0.273613       0.162000       0.057000       0.152700   -9999.000000
57358     57358     hubei          110.9700       30.8197          117       164     2012      11        02        307              0.161792      15.537689       5.730187       0.270698   -9999.000000   -9999.000000   -9999.000000       0.285000
57358     57358     hubei          110.9700       30.8197          117       164     2012      11        03        308              0.182417      16.488251       2.735053       0.274708   -9999.000000       0.171000   -9999.000000   -9999.000000
57358     57358     hubei          110.9700       30.8197          117       164     2012      11        04        309              0.170957      14.327820       0.000000       0.285846       0.182000   -9999.000000       0.149700       0.543000
57358     57358     hubei          110.9700       30.8197          117       164     2012      11        05        310              0.161458      14.479004       0.000000       0.273443       0.181000       0.225200       0.113500   -9999.000000
57358     57358     hubei          110.9700       30.8197          117       164     2012      11        06        311              0.156250      14.233643       0.000000       0.270053       0.167000       0.204400       0.113900       0.243000
57358     57358     hubei          110.9700       30.8197          117       164     2012      11        07        312              0.165958      14.471497       5.462373       0.267602   -9999.000000   -9999.000000   -9999.000000       0.707000
57358     57358     hubei          110.9700       30.8197          117       164     2012      11        08        313              0.176958      12.807953       0.336977       0.279939       0.201000       0.053700   -9999.000000   -9999.000000
57358     57358     hubei          110.9700       30.8197          117       164     2012      11        09        314              0.177042      12.353851       0.956977       0.276014       0.200500   -9999.000000       0.117800       0.536000
57358     57358     hubei          110.9700       30.8197          117       164     2012      11        10        315              0.170083      11.261902       0.131786       0.274655       0.188000       0.067000       0.115600   -9999.000000
57358     57358     hubei          110.9700       30.8197          117       164     2012      11        11        316              0.161708      12.616913       0.000000       0.270524       0.161000       0.263000       0.110000       0.289000
57358     57358     hubei          110.9700       30.8197          117       164     2012      11        12        317              0.157917      11.832275       0.000000       0.268215       0.170000   -9999.000000       0.166000   -9999.000000
57358     57358     hubei          110.9700       30.8197          117       164     2012      11        13        318              0.000000      12.081909       0.000000       0.267114   -9999.000000       0.064100   -9999.000000   -9999.000000
57358     57358     hubei          110.9700       30.8197          117       164     2012      11        14        319              0.148292      14.188721       0.456321       0.265435       0.188000   -9999.000000   -9999.000000       0.690000
57358     57358     hubei          110.9700       30.8197          117       164     2012      11        15        320              0.183458      13.143982      12.596784       0.266729       0.200500       0.084900       0.166700   -9999.000000
57358     57358     hubei          110.9700       30.8197          117       164     2012      11        16        321              0.178042      11.605774       0.000000       0.293391       0.164000   -9999.000000       0.166700       0.270000
57358     57358     hubei          110.9700       30.8197          117       164     2012      11        17        322              0.000000      11.631622       0.000000       0.281256       0.162000   -9999.000000       0.161800   -9999.000000
57358     57358     hubei          110.9700       30.8197          117       164     2012      11        18        323              0.160625      13.042786       0.403827       0.272740   -9999.000000       0.120700       0.162200   -9999.000000
57358     57358     hubei          110.9700       30.8197          117       164     2012      11        19        324              0.153667      13.313812       0.077976       0.269432       0.183000   -9999.000000   -9999.000000       0.391000
57358     57358     hubei          110.9700       30.8197          117       164     2012      11        20        325              0.163917      12.363190       4.107563       0.268002       0.197500   -9999.000000   -9999.000000   -9999.000000
57358     57358     hubei          110.9700       30.8197          117       164     2012      11        21        326              0.175625      10.996246       0.142073       0.276159       0.170000       0.111200       0.080000       0.315000
57358     57358     hubei          110.9700       30.8197          117       164     2012      11        22        327              0.170167      11.173157       0.356908       0.273852       0.177500   -9999.000000       0.077100   -9999.000000
57358     57358     hubei          110.9700       30.8197          117       164     2012      11        23        328              0.163458      10.751190       0.000000       0.270492   -9999.000000       0.291300       0.082700       0.320000
57358     57358     hubei          110.9700       30.8197          117       164     2012      11        24        329              0.158083       8.445648       0.376380       0.268217   -9999.000000   -9999.000000   -9999.000000       0.250000
57358     57358     hubei          110.9700       30.8197          117       164     2012      11        25        330              0.157292       7.794159       0.150561       0.267201   -9999.000000   -9999.000000   -9999.000000   -9999.000000
57358     57358     hubei          110.9700       30.8197          117       164     2012      11        26        331              0.154000       7.913666       0.000000       0.267096       0.159000   -9999.000000   -9999.000000       0.117000
57358     57358     hubei          110.9700       30.8197          117       164     2012      11        27        332              0.147500       9.306000       0.230588       0.265265       0.165000   -9999.000000       0.097600   -9999.000000
57358     57358     hubei          110.9700       30.8197          117       164     2012      11        28        333              0.143958       8.961365       0.000000       0.264947       0.169000       0.208400       0.095100       0.327000
57358     57358     hubei          110.9700       30.8197          117       164     2012      11        29        334              0.139958       9.280762       0.000000       0.264284   -9999.000000   -9999.000000       0.101200   -9999.000000
57358     57358     hubei          110.9700       30.8197          117       164     2012      11        30        335              0.144167       7.703094       3.721667       0.263675       0.194000   -9999.000000   -9999.000000   -9999.000000
57358     57358     hubei          110.9700       30.8197          117       164     2012      12        01        336              0.169000       7.114166       1.241511       0.270602   -9999.000000       0.243700   -9999.000000       0.244000
57358     57358     hubei          110.9700       30.8197          117       164     2012      12        02        337              0.160792       7.459656       0.681477       0.274781       0.125000   -9999.000000       0.097000   -9999.000000
57358     57358     hubei          110.9700       30.8197          117       164     2012      12        03        338              0.154167       8.601898       0.283616       0.269402       0.117000       0.101600       0.095900       0.183000
57358     57358     hubei          110.9700       30.8197          117       164     2012      12        04        339              0.146792       9.331787       0.000000       0.265785   -9999.000000   -9999.000000       0.094700   -9999.000000
57358     57358     hubei          110.9700       30.8197          117       164     2012      12        05        340              0.153208       7.562714       0.000000       0.265085       0.137000   -9999.000000       0.093000       0.045000
57358     57358     hubei          110.9700       30.8197          117       164     2012      12        06        341              0.141792       9.225372       0.000000       0.263326       0.110000       0.200900   -9999.000000       0.146000
57358     57358     hubei          110.9700       30.8197          117       164     2012      12        07        342              0.147609       9.152588       0.000000       0.262360       0.116000   -9999.000000   -9999.000000   -9999.000000
57358     57358     hubei          110.9700       30.8197          117       164     2012      12        08        343              0.150792       9.392212       0.000000       0.261362       0.120000   -9999.000000       0.093500       0.288000
57358     57358     hubei          110.9700       30.8197          117       164     2012      12        09        344              0.132958       9.310425       0.730643       0.260312   -9999.000000       0.101500       0.097100   -9999.000000
57358     57358     hubei          110.9700       30.8197          117       164     2012      12        10        345              0.139083       7.060974       3.562593       0.260137   -9999.000000   -9999.000000       0.075600       0.145000
57358     57358     hubei          110.9700       30.8197          117       164     2012      12        11        346              0.143750       5.781372       0.358559       0.270799   -9999.000000       0.372900   -9999.000000   -9999.000000
57358     57358     hubei          110.9700       30.8197          117       164     2012      12        12        347              0.140125       5.948944       0.715023       0.267017       0.163000       0.208500   -9999.000000   -9999.000000
57358     57358     hubei          110.9700       30.8197          117       164     2012      12        13        348              0.138500       5.295868       0.038588       0.264338       0.161000   -9999.000000       0.077500       0.284000
57358     57358     hubei          110.9700       30.8197          117       164     2012      12        14        349              0.138500       5.060913       0.730659       0.263547       0.156000       0.030200       0.077000   -9999.000000
57358     57358     hubei          110.9700       30.8197          117       164     2012      12        15        350              0.000000       5.155273       0.000000       0.265276   -9999.000000   -9999.000000       0.070500       0.100000
57358     57358     hubei          110.9700       30.8197          117       164     2012      12        16        351              0.136167       5.865204       0.000000       0.263746       0.156000       0.040100       0.076000   -9999.000000
57358     57358     hubei          110.9700       30.8197          117       164     2012      12        17        352              0.165417       6.089050       7.373173       0.262707   -9999.000000       0.114300   -9999.000000   -9999.000000
57358     57358     hubei          110.9700       30.8197          117       164     2012      12        18        353              0.168500       4.025970       0.217061       0.282669   -9999.000000   -9999.000000   -9999.000000       0.214000
57358     57358     hubei          110.9700       30.8197          117       164     2012      12        19        354              0.167417       3.864502       0.505247       0.271759   -9999.000000       0.056300       0.059300   -9999.000000
57358     57358     hubei          110.9700       30.8197          117       164     2012      12        20        355              0.000000       2.917450       1.216776       0.267464   -9999.000000   -9999.000000       0.054500       0.261000
57358     57358     hubei          110.9700       30.8197          117       164     2012      12        21        356              0.169667       2.143433       1.627615       0.264853   -9999.000000       0.113700       0.057900   -9999.000000
57358     57358     hubei          110.9700       30.8197          117       164     2012      12        22        357              0.164333       3.375702       0.519317       0.269936   -9999.000000   -9999.000000   -9999.000000       0.266000
57358     57358     hubei          110.9700       30.8197          117       164     2012      12        23        358              0.157375       3.225067       0.569153       0.265673   -9999.000000   -9999.000000   -9999.000000       0.139000
57358     57358     hubei          110.9700       30.8197          117       164     2012      12        24        359              0.156684       2.566284       1.885212       0.258943       0.118000   -9999.000000       0.067500   -9999.000000
57358     57358     hubei          110.9700       30.8197          117       164     2012      12        25        360              0.158500       4.358398       0.293626       0.267597   -9999.000000   -9999.000000       0.066400       0.019000
57358     57358     hubei          110.9700       30.8197          117       164     2012      12        26        361              0.000000       2.337830       0.269023       0.260897   -9999.000000       0.067000       0.062600   -9999.000000
57358     57358     hubei          110.9700       30.8197          117       164     2012      12        27        362              0.156917       1.631958       0.727325       0.250262   -9999.000000       0.098000       0.065700       0.066000
57358     57358     hubei          110.9700       30.8197          117       164     2012      12        28        363              0.154000       1.996124       3.079839       0.251575   -9999.000000   -9999.000000   -9999.000000   -9999.000000
57358     57358     hubei          110.9700       30.8197          117       164     2012      12        29        364              0.000000       1.585846       3.107840       0.250893   -9999.000000   -9999.000000   -9999.000000   -9999.000000
57358     57358     hubei          110.9700       30.8197          117       164     2012      12        30        365              0.000000       1.662750       1.542917       0.258813   -9999.000000   -9999.000000       0.061700       0.014000
57358     57358     hubei          110.9700       30.8197          117       164     2012      12        31        366              0.167067       2.439575       0.419968       0.254957   -9999.000000   -9999.000000       0.071000   -9999.000000
