# Supplementary material for: Research on Fusing Multisatellite Soil Moisture Data Based on Bayesian Model Averaging
Source: Hindawi journal article supplement (doi:10.1155/2018/9310838), 2018-06-25
Supplement: f1 [file 9310838.f1.zip › 2012_sm00-10cm_daily_ZDB_ZHY_57378_366days_allin.txt]

57378     57378     hubei          112.5697       31.1700          115       170     2012      01        01        001              0.000000   -9999.000000       0.000000   -9999.000000   -9999.000000   -9999.000000       0.141000   -9999.000000
57378     57378     hubei          112.5697       31.1700          115       170     2012      01        02        002              0.226417       3.687958       0.000000       0.261788   -9999.000000       0.033000       0.175000       0.196000
57378     57378     hubei          112.5697       31.1700          115       170     2012      01        03        003              0.000000       3.596344       0.000000       0.265370   -9999.000000       0.081700   -9999.000000       0.184000
57378     57378     hubei          112.5697       31.1700          115       170     2012      01        04        004              0.220875       2.551056       0.000000       0.244728   -9999.000000   -9999.000000       0.170800   -9999.000000
57378     57378     hubei          112.5697       31.1700          115       170     2012      01        05        005              0.217375       2.924744       0.000000       0.239452   -9999.000000       0.138600       0.161900       0.177000
57378     57378     hubei          112.5697       31.1700          115       170     2012      01        06        006              0.215708       2.200867       0.000000       0.234671   -9999.000000   -9999.000000       0.166300   -9999.000000
57378     57378     hubei          112.5697       31.1700          115       170     2012      01        07        007              0.211833       3.247803       0.000000       0.242837   -9999.000000       0.073800       0.176000       0.177000
57378     57378     hubei          112.5697       31.1700          115       170     2012      01        08        008              0.000000       1.916107       0.000000       0.244776   -9999.000000   -9999.000000   -9999.000000   -9999.000000
57378     57378     hubei          112.5697       31.1700          115       170     2012      01        09        009              0.211083       3.480835       0.000000       0.252809   -9999.000000       0.056700   -9999.000000   -9999.000000
57378     57378     hubei          112.5697       31.1700          115       170     2012      01        10        010              0.208875       4.515076       0.000000       0.255049   -9999.000000       0.043900       0.102500       0.235000
57378     57378     hubei          112.5697       31.1700          115       170     2012      01        11        011              0.206167       3.289001       0.000000       0.252946   -9999.000000   -9999.000000       0.114300   -9999.000000
57378     57378     hubei          112.5697       31.1700          115       170     2012      01        12        012              0.204500       2.718262       0.323991       0.251578   -9999.000000       0.130400       0.118200       0.136000
57378     57378     hubei          112.5697       31.1700          115       170     2012      01        13        013              0.204125       2.703247       3.670321       0.252101   -9999.000000       0.036800       0.116600   -9999.000000
57378     57378     hubei          112.5697       31.1700          115       170     2012      01        14        014              0.206042       3.142700       2.168564       0.256062   -9999.000000   -9999.000000   -9999.000000   -9999.000000
57378     57378     hubei          112.5697       31.1700          115       170     2012      01        15        015              0.209625       2.142639       0.000000       0.272199   -9999.000000       0.055900   -9999.000000       0.389000
57378     57378     hubei          112.5697       31.1700          115       170     2012      01        16        016              0.212667       4.053650       0.000000       0.268191   -9999.000000   -9999.000000       0.085700   -9999.000000
57378     57378     hubei          112.5697       31.1700          115       170     2012      01        17        017              0.000000       4.311920       1.058650       0.263296   -9999.000000   -9999.000000       0.096000       0.544000
57378     57378     hubei          112.5697       31.1700          115       170     2012      01        18        018              0.215625       3.047913       0.000000       0.265749   -9999.000000       0.166500       0.098400   -9999.000000
57378     57378     hubei          112.5697       31.1700          115       170     2012      01        19        019              0.216750       3.418030       0.493373       0.263025   -9999.000000   -9999.000000   -9999.000000       0.524000
57378     57378     hubei          112.5697       31.1700          115       170     2012      01        20        020              0.229875       3.736023       6.550235       0.263220   -9999.000000       0.017300   -9999.000000       0.687000
57378     57378     hubei          112.5697       31.1700          115       170     2012      01        21        021              0.255833       3.215302       1.154614       0.282581   -9999.000000       0.206800       0.083800   -9999.000000
57378     57378     hubei          112.5697       31.1700          115       170     2012      01        22        022              0.260792       1.297668       0.552491       0.237610   -9999.000000   -9999.000000       0.075800       0.193000
57378     57378     hubei          112.5697       31.1700          115       170     2012      01        23        023              0.260542       0.366455       0.426937       0.195408   -9999.000000       0.035100       0.113100   -9999.000000
57378     57378     hubei          112.5697       31.1700          115       170     2012      01        24        024              0.261458       1.094727       0.357439       0.217815   -9999.000000   -9999.000000   -9999.000000       0.259000
57378     57378     hubei          112.5697       31.1700          115       170     2012      01        25        025              0.261000       2.299774       0.000000       0.232530   -9999.000000       0.093000   -9999.000000   -9999.000000
57378     57378     hubei          112.5697       31.1700          115       170     2012      01        26        026              0.261417       3.013824       0.566050       0.242229   -9999.000000       0.074200   -9999.000000   -9999.000000
57378     57378     hubei          112.5697       31.1700          115       170     2012      01        27        027              0.260917       4.379608       0.000000       0.255156   -9999.000000       0.028800       0.114100       0.030000
57378     57378     hubei          112.5697       31.1700          115       170     2012      01        28        028              0.261958       2.953552       0.048197       0.258381       0.116000       0.027300       0.121600   -9999.000000
57378     57378     hubei          112.5697       31.1700          115       170     2012      01        29        029              0.259833       5.216797       1.012200       0.257889   -9999.000000   -9999.000000       0.135700       0.405000
57378     57378     hubei          112.5697       31.1700          115       170     2012      01        30        030              0.262042       2.190948       0.000000       0.260924   -9999.000000       0.186200       0.126700   -9999.000000
57378     57378     hubei          112.5697       31.1700          115       170     2012      01        31        031              0.262208       4.343842       1.102617       0.258400   -9999.000000       0.083700   -9999.000000       0.140000
57378     57378     hubei          112.5697       31.1700          115       170     2012      02        01        032              0.260208       6.253510       0.000000       0.260309   -9999.000000   -9999.000000   -9999.000000       0.009000
57378     57378     hubei          112.5697       31.1700          115       170     2012      02        02        033              0.258917       2.392822       0.000000       0.251619   -9999.000000       0.157700       0.102800   -9999.000000
57378     57378     hubei          112.5697       31.1700          115       170     2012      02        03        034              0.258542       2.941498       0.116172       0.237624       0.119000   -9999.000000       0.121800       0.090000
57378     57378     hubei          112.5697       31.1700          115       170     2012      02        04        035              0.257833       4.221924       0.000000       0.247675   -9999.000000   -9999.000000       0.123800   -9999.000000
57378     57378     hubei          112.5697       31.1700          115       170     2012      02        05        036              0.258250       3.169525       0.111913       0.254263   -9999.000000       0.196200   -9999.000000       0.401000
57378     57378     hubei          112.5697       31.1700          115       170     2012      02        06        037              0.258083       4.262299       0.000000       0.255350   -9999.000000   -9999.000000   -9999.000000   -9999.000000
57378     57378     hubei          112.5697       31.1700          115       170     2012      02        07        038              0.256792       4.769012       0.000000       0.254351   -9999.000000       0.213700       0.133100   -9999.000000
57378     57378     hubei          112.5697       31.1700          115       170     2012      02        08        039              0.255333       4.238770       0.530320       0.245992   -9999.000000       0.088800       0.148200       0.002000
57378     57378     hubei          112.5697       31.1700          115       170     2012      02        09        040              0.251500       4.588165       0.000000       0.247426   -9999.000000   -9999.000000       0.144000   -9999.000000
57378     57378     hubei          112.5697       31.1700          115       170     2012      02        10        041              0.250875       2.460144       0.221358       0.243062   -9999.000000       0.065000       0.146000       0.160000
57378     57378     hubei          112.5697       31.1700          115       170     2012      02        11        042              0.248750       4.840363       0.000000       0.244304   -9999.000000   -9999.000000   -9999.000000   -9999.000000
57378     57378     hubei          112.5697       31.1700          115       170     2012      02        12        043              0.245125       6.135284       0.000000       0.246847   -9999.000000       0.036200   -9999.000000   -9999.000000
57378     57378     hubei          112.5697       31.1700          115       170     2012      02        13        044              0.241833       4.241547       0.000000       0.248778   -9999.000000       0.171200   -9999.000000       0.186000
57378     57378     hubei          112.5697       31.1700          115       170     2012      02        14        045              0.239125       3.303925       1.042304       0.248479   -9999.000000   -9999.000000       0.130800   -9999.000000
57378     57378     hubei          112.5697       31.1700          115       170     2012      02        15        046              0.238458       3.605713       0.651165       0.253690   -9999.000000       0.043300       0.138000       0.413000
57378     57378     hubei          112.5697       31.1700          115       170     2012      02        16        047              0.240625       3.596222       0.000000       0.256652   -9999.000000   -9999.000000       0.126200   -9999.000000
57378     57378     hubei          112.5697       31.1700          115       170     2012      02        17        048              0.240042       6.174866       2.176660       0.252468       0.125000       0.059100   -9999.000000   -9999.000000
57378     57378     hubei          112.5697       31.1700          115       170     2012      02        18        049              0.239667       5.590210       0.628247       0.253805       0.122000       0.043300   -9999.000000       0.007000
57378     57378     hubei          112.5697       31.1700          115       170     2012      02        19        050              0.239708       5.978668       0.578586       0.253223       0.119000   -9999.000000       0.115900   -9999.000000
57378     57378     hubei          112.5697       31.1700          115       170     2012      02        20        051              0.239043       7.350769       0.000000       0.252166   -9999.000000       0.049100       0.090500       0.037000
57378     57378     hubei          112.5697       31.1700          115       170     2012      02        21        052              0.240167       6.405182       0.000000       0.251799   -9999.000000   -9999.000000   -9999.000000   -9999.000000
57378     57378     hubei          112.5697       31.1700          115       170     2012      02        22        053              0.240000       8.663879       0.000000       0.250335       0.085000   -9999.000000   -9999.000000       0.120000
57378     57378     hubei          112.5697       31.1700          115       170     2012      02        23        054              0.236292       8.934998       0.147101       0.249723       0.111000       0.095000   -9999.000000   -9999.000000
57378     57378     hubei          112.5697       31.1700          115       170     2012      02        24        055              0.232250       5.871490       0.000000       0.249148   -9999.000000   -9999.000000       0.089400   -9999.000000
57378     57378     hubei          112.5697       31.1700          115       170     2012      02        25        056              0.229000       4.347626       0.627141       0.248436   -9999.000000       0.007100       0.089800       0.039000
57378     57378     hubei          112.5697       31.1700          115       170     2012      02        26        057              0.228292       4.106781       0.743951       0.248776   -9999.000000       0.134200       0.090300   -9999.000000
57378     57378     hubei          112.5697       31.1700          115       170     2012      02        27        058              0.225783       5.515564       0.895905       0.249532   -9999.000000       0.031100   -9999.000000       0.111000
57378     57378     hubei          112.5697       31.1700          115       170     2012      02        28        059              0.224875       6.020813       0.138868       0.251342       0.096000       0.104200   -9999.000000   -9999.000000
57378     57378     hubei          112.5697       31.1700          115       170     2012      02        29        060              0.000000   -9999.000000       0.000000   -9999.000000   -9999.000000   -9999.000000   -9999.000000   -9999.000000
57378     57378     hubei          112.5697       31.1700          115       170     2012      03        01        061              0.219417       7.107117       0.000000       0.247750       0.141000       0.057700       0.081400       0.001000
57378     57378     hubei          112.5697       31.1700          115       170     2012      03        02        062              0.218000       6.611359       1.845248       0.247063   -9999.000000       0.028400       0.098400   -9999.000000
57378     57378     hubei          112.5697       31.1700          115       170     2012      03        03        063              0.216667       6.474609       3.423490       0.249757   -9999.000000   -9999.000000       0.100600       0.199000
57378     57378     hubei          112.5697       31.1700          115       170     2012      03        04        064              0.216792       5.256409       0.025205       0.265659   -9999.000000       0.065900       0.104500   -9999.000000
57378     57378     hubei          112.5697       31.1700          115       170     2012      03        05        065              0.222208       4.061829       0.000000       0.262890       0.134000   -9999.000000   -9999.000000       0.008000
57378     57378     hubei          112.5697       31.1700          115       170     2012      03        06        066              0.222542       8.189972       0.000000       0.255172       0.137000       0.190600   -9999.000000   -9999.000000
57378     57378     hubei          112.5697       31.1700          115       170     2012      03        07        067              0.000000       7.677429       1.018460       0.252597   -9999.000000       0.224500       0.109200   -9999.000000
57378     57378     hubei          112.5697       31.1700          115       170     2012      03        08        068              0.223042       7.208496       0.182512       0.255077   -9999.000000   -9999.000000       0.111700       0.127000
57378     57378     hubei          112.5697       31.1700          115       170     2012      03        09        069              0.223750       6.145203       0.202707       0.254467       0.120000       0.039300       0.117100   -9999.000000
57378     57378     hubei          112.5697       31.1700          115       170     2012      03        10        070              0.227375       6.755554       0.165097       0.251034       0.130000   -9999.000000   -9999.000000       0.001000
57378     57378     hubei          112.5697       31.1700          115       170     2012      03        11        071              0.226042      10.106415       0.115582       0.247334       0.118000       0.113700   -9999.000000   -9999.000000
57378     57378     hubei          112.5697       31.1700          115       170     2012      03        12        072              0.226250       8.934601       0.000000       0.244428   -9999.000000       0.283800       0.100700   -9999.000000
57378     57378     hubei          112.5697       31.1700          115       170     2012      03        13        073              0.227870      10.059387       0.000000       0.242176   -9999.000000   -9999.000000       0.106600       0.006000
57378     57378     hubei          112.5697       31.1700          115       170     2012      03        14        074              0.228167      12.841034       0.606567       0.239018       0.124000       0.032600   -9999.000000   -9999.000000
57378     57378     hubei          112.5697       31.1700          115       170     2012      03        15        075              0.232583      14.362213       3.173563       0.238587       0.155000   -9999.000000       0.127000       0.285000
57378     57378     hubei          112.5697       31.1700          115       170     2012      03        16        076              0.235043       9.124542       0.000000       0.260272       0.133000   -9999.000000   -9999.000000   -9999.000000
57378     57378     hubei          112.5697       31.1700          115       170     2012      03        17        077              0.237478      10.498505       0.000000       0.250928       0.131000       0.103200   -9999.000000       0.069000
57378     57378     hubei          112.5697       31.1700          115       170     2012      03        18        078              0.241250      13.115753       0.000000       0.245877   -9999.000000   -9999.000000       0.100500       0.038000
57378     57378     hubei          112.5697       31.1700          115       170     2012      03        19        079              0.233417      14.747681       1.028624       0.240572       0.160000       0.081900       0.180000   -9999.000000
57378     57378     hubei          112.5697       31.1700          115       170     2012      03        20        080              0.232458       6.411255       0.129235       0.244559       0.144500       0.024900       0.172200       0.069000
57378     57378     hubei          112.5697       31.1700          115       170     2012      03        21        081              0.239917       7.223846      15.455761       0.246115       0.192500   -9999.000000       0.190300   -9999.000000
57378     57378     hubei          112.5697       31.1700          115       170     2012      03        22        082              0.279875       7.996002       7.815909       0.276380   -9999.000000       0.085300   -9999.000000       0.502000
57378     57378     hubei          112.5697       31.1700          115       170     2012      03        23        083              0.280333       7.605042       0.064712       0.300296   -9999.000000   -9999.000000       0.170900   -9999.000000
57378     57378     hubei          112.5697       31.1700          115       170     2012      03        24        084              0.276792      11.581421       0.000000       0.276355   -9999.000000       0.100300   -9999.000000   -9999.000000
57378     57378     hubei          112.5697       31.1700          115       170     2012      03        25        085              0.000000      14.521515       0.000000       0.265258       0.137000       0.163700       0.162800       0.037000
57378     57378     hubei          112.5697       31.1700          115       170     2012      03        26        086              0.271875      16.723999       1.110068       0.258464       0.136000   -9999.000000       0.184200   -9999.000000
57378     57378     hubei          112.5697       31.1700          115       170     2012      03        27        087              0.265958      18.351624       0.000000       0.250991       0.129000       0.123800   -9999.000000       0.062000
57378     57378     hubei          112.5697       31.1700          115       170     2012      03        28        088              0.260667      19.075928       0.269593       0.246508   -9999.000000   -9999.000000   -9999.000000   -9999.000000
57378     57378     hubei          112.5697       31.1700          115       170     2012      03        29        089              0.257042      18.792542       1.090249       0.244943       0.149000       0.099900       0.176500       0.068000
57378     57378     hubei          112.5697       31.1700          115       170     2012      03        30        090              0.253583      18.013702       0.000000       0.247413       0.119000       0.093600       0.198600       0.174000
57378     57378     hubei          112.5697       31.1700          115       170     2012      03        31        091              0.249167      16.041412       0.000000       0.247251       0.132000   -9999.000000       0.175800   -9999.000000
57378     57378     hubei          112.5697       31.1700          115       170     2012      04        01        092              0.241042      18.321991       0.000000       0.236273       0.170000       0.097700       0.180300       0.135000
57378     57378     hubei          112.5697       31.1700          115       170     2012      04        02        093              0.233667      19.848602       0.000000       0.230107       0.171000       0.027300   -9999.000000   -9999.000000
57378     57378     hubei          112.5697       31.1700          115       170     2012      04        03        094              0.226167      18.586487       0.000000       0.226592   -9999.000000   -9999.000000   -9999.000000       0.061000
57378     57378     hubei          112.5697       31.1700          115       170     2012      04        04        095              0.221500      17.125854       0.487178       0.223851       0.193000       0.084200       0.132300   -9999.000000
57378     57378     hubei          112.5697       31.1700          115       170     2012      04        05        096              0.220083      14.652313       0.000000       0.229864       0.176500   -9999.000000       0.142400   -9999.000000
57378     57378     hubei          112.5697       31.1700          115       170     2012      04        06        097              0.218958      17.489410       0.000000       0.227841       0.169000       0.073600       0.141300       0.033000
57378     57378     hubei          112.5697       31.1700          115       170     2012      04        07        098              0.216750      20.217224       0.000000       0.221214       0.165000       0.155200       0.137300   -9999.000000
57378     57378     hubei          112.5697       31.1700          115       170     2012      04        08        099              0.214042      21.380493       0.501001       0.214905   -9999.000000       0.159100   -9999.000000       0.021000
57378     57378     hubei          112.5697       31.1700          115       170     2012      04        09        100              0.211125      19.472107       1.100137       0.216662       0.195000       0.126300       0.113900   -9999.000000
57378     57378     hubei          112.5697       31.1700          115       170     2012      04        10        101              0.212333      18.896332       0.165030       0.230683       0.178500   -9999.000000       0.112100   -9999.000000
57378     57378     hubei          112.5697       31.1700          115       170     2012      04        11        102              0.215167      19.630310       0.175348       0.225917       0.194500       0.067800       0.108700       0.119000
57378     57378     hubei          112.5697       31.1700          115       170     2012      04        12        103              0.240000      21.467316       9.197716       0.221587   -9999.000000   -9999.000000       0.138000   -9999.000000
57378     57378     hubei          112.5697       31.1700          115       170     2012      04        13        104              0.253333      14.230469       0.027511       0.267533   -9999.000000   -9999.000000   -9999.000000       0.017000
57378     57378     hubei          112.5697       31.1700          115       170     2012      04        14        105              0.250375      17.661285       0.178074       0.248081       0.216000       0.074800   -9999.000000   -9999.000000
57378     57378     hubei          112.5697       31.1700          115       170     2012      04        15        106              0.248750      16.035370       0.052829       0.243450       0.208000   -9999.000000       0.108900       0.126000
57378     57378     hubei          112.5697       31.1700          115       170     2012      04        16        107              0.252333      15.543579       0.000000       0.240686       0.190500       0.067000       0.182700       0.190000
57378     57378     hubei          112.5697       31.1700          115       170     2012      04        17        108              0.247000      19.673523       0.022462       0.234298       0.186000       0.146600       0.183200   -9999.000000
57378     57378     hubei          112.5697       31.1700          115       170     2012      04        18        109              0.244458      18.190155       0.000000       0.232604   -9999.000000   -9999.000000   -9999.000000       0.018000
57378     57378     hubei          112.5697       31.1700          115       170     2012      04        19        110              0.236833      21.881195       1.744714       0.224622       0.190000       0.013900   -9999.000000   -9999.000000
57378     57378     hubei          112.5697       31.1700          115       170     2012      04        20        111              0.227417      23.900726       3.349728       0.216706       0.224000   -9999.000000   -9999.000000       0.282000
57378     57378     hubei          112.5697       31.1700          115       170     2012      04        21        112              0.229042      19.454651       0.000000       0.241850       0.222500   -9999.000000       0.165100   -9999.000000
57378     57378     hubei          112.5697       31.1700          115       170     2012      04        22        113              0.226625      22.633270       6.573169       0.225354       0.216000       0.264100       0.181200   -9999.000000
57378     57378     hubei          112.5697       31.1700          115       170     2012      04        23        114              0.221167      24.351837      12.066041       0.243236       0.222000   -9999.000000       0.174100       0.641000
57378     57378     hubei          112.5697       31.1700          115       170     2012      04        24        115              0.259833      24.271637       3.400269       0.268443   -9999.000000   -9999.000000       0.189300   -9999.000000
57378     57378     hubei          112.5697       31.1700          115       170     2012      04        25        116              0.000000      20.260803       0.530295       0.278705       0.242000       0.199900   -9999.000000       0.264000
57378     57378     hubei          112.5697       31.1700          115       170     2012      04        26        117              0.268167      20.248505       0.000000       0.256974       0.222000   -9999.000000       0.166200   -9999.000000
57378     57378     hubei          112.5697       31.1700          115       170     2012      04        27        118              0.257250      22.421204       0.000000       0.243084       0.214000       0.091600   -9999.000000       0.260000
57378     57378     hubei          112.5697       31.1700          115       170     2012      04        28        119              0.244042      24.520905       3.380981       0.232256       0.222000   -9999.000000       0.182000       0.261000
57378     57378     hubei          112.5697       31.1700          115       170     2012      04        29        120              0.238208      24.023254       1.301538       0.245962   -9999.000000       0.153000       0.172200   -9999.000000
57378     57378     hubei          112.5697       31.1700          115       170     2012      04        30        121              0.268583      21.281067       9.140576       0.246389       0.288000       0.395300   -9999.000000       0.967000
57378     57378     hubei          112.5697       31.1700          115       170     2012      05        01        122              0.282875      20.047119       0.429607       0.280714       0.257000   -9999.000000   -9999.000000   -9999.000000
57378     57378     hubei          112.5697       31.1700          115       170     2012      05        02        123              0.281125      22.189362       1.737160       0.259560       0.206000       0.063100       0.161000       0.416000
57378     57378     hubei          112.5697       31.1700          115       170     2012      05        03        124              0.279250      24.035034       0.305718       0.253257       0.241000   -9999.000000       0.169100   -9999.000000
57378     57378     hubei          112.5697       31.1700          115       170     2012      05        04        125              0.276375      23.127838       0.000000       0.252711   -9999.000000       0.187900       0.160100   -9999.000000
57378     57378     hubei          112.5697       31.1700          115       170     2012      05        05        126              0.266500      24.542236       0.000000       0.242994       0.225000   -9999.000000       0.152200       0.342000
57378     57378     hubei          112.5697       31.1700          115       170     2012      05        06        127              0.249583      26.782471       0.000000       0.231342       0.209500   -9999.000000   -9999.000000   -9999.000000
57378     57378     hubei          112.5697       31.1700          115       170     2012      05        07        128              0.242583      28.117004       6.588332       0.220816   -9999.000000       0.162100   -9999.000000       0.796000
57378     57378     hubei          112.5697       31.1700          115       170     2012      05        08        129              0.240333      24.980469       0.050651       0.258802       0.195000       0.040400       0.138000   -9999.000000
57378     57378     hubei          112.5697       31.1700          115       170     2012      05        09        130              0.261792      27.380707       0.250328       0.239838   -9999.000000       0.084700       0.153700   -9999.000000
57378     57378     hubei          112.5697       31.1700          115       170     2012      05        10        131              0.279583      25.770844       0.000000       0.233285       0.240000       0.388400       0.142700       0.586000
57378     57378     hubei          112.5697       31.1700          115       170     2012      05        11        132              0.267167      27.922028       3.641965       0.219908       0.225000   -9999.000000   -9999.000000   -9999.000000
57378     57378     hubei          112.5697       31.1700          115       170     2012      05        12        133              0.304500      28.239288      28.045023       0.221916       0.297000   -9999.000000   -9999.000000       0.997000
57378     57378     hubei          112.5697       31.1700          115       170     2012      05        13        134              0.311167      20.409546      19.971487       0.312735       0.272000       0.234300       0.184900   -9999.000000
57378     57378     hubei          112.5697       31.1700          115       170     2012      05        14        135              0.303125      21.815033       0.740392       0.308791       0.260000       0.259400       0.171100       0.822000
57378     57378     hubei          112.5697       31.1700          115       170     2012      05        15        136              0.300458      21.647369       0.000000       0.293172   -9999.000000       0.264000       0.171300       0.598000
57378     57378     hubei          112.5697       31.1700          115       170     2012      05        16        137              0.299458      24.074860       0.347220       0.275705       0.259000   -9999.000000       0.163400   -9999.000000
57378     57378     hubei          112.5697       31.1700          115       170     2012      05        17        138              0.297250      25.596069       0.000000       0.264293       0.220500       0.178600   -9999.000000       0.295000
57378     57378     hubei          112.5697       31.1700          115       170     2012      05        18        139              0.290667      26.983887       1.395813       0.253206       0.298000       0.222100   -9999.000000   -9999.000000
57378     57378     hubei          112.5697       31.1700          115       170     2012      05        19        140              0.286542      23.782349       0.000000       0.258913       0.228000       0.059800       0.145800       0.261000
57378     57378     hubei          112.5697       31.1700          115       170     2012      05        20        141              0.271250      25.840820       0.000000       0.249118   -9999.000000       0.028200       0.163600   -9999.000000
57378     57378     hubei          112.5697       31.1700          115       170     2012      05        21        142              0.254292      26.770172       0.142174       0.236062       0.278000   -9999.000000       0.136700   -9999.000000
57378     57378     hubei          112.5697       31.1700          115       170     2012      05        22        143              0.260583      25.527283       5.705385       0.233155       0.302000       0.215900       0.155000       0.775000
57378     57378     hubei          112.5697       31.1700          115       170     2012      05        23        144              0.285000      22.715424       0.770773       0.258133   -9999.000000       0.356000   -9999.000000   -9999.000000
57378     57378     hubei          112.5697       31.1700          115       170     2012      05        24        145              0.299083      22.677063       7.441421       0.257334       0.329000   -9999.000000   -9999.000000       0.730000
57378     57378     hubei          112.5697       31.1700          115       170     2012      05        25        146              0.000000      20.995911       1.679161       0.278665   -9999.000000       0.150000       0.158800   -9999.000000
57378     57378     hubei          112.5697       31.1700          115       170     2012      05        26        147              0.298417      20.186462       0.000000       0.270558       0.299000   -9999.000000       0.147700       0.203000
57378     57378     hubei          112.5697       31.1700          115       170     2012      05        27        148              0.296625      25.353027       0.000000       0.254749       0.257500   -9999.000000       0.163300       0.268000
57378     57378     hubei          112.5697       31.1700          115       170     2012      05        28        149              0.295250      26.256134       9.373671       0.245695       0.311500       0.179600   -9999.000000   -9999.000000
57378     57378     hubei          112.5697       31.1700          115       170     2012      05        29        150              0.310417      27.858429      26.687916       0.255137   -9999.000000   -9999.000000   -9999.000000       0.884000
57378     57378     hubei          112.5697       31.1700          115       170     2012      05        30        151              0.303500      21.591827       0.000000       0.321077       0.300000       0.263400       0.167700   -9999.000000
57378     57378     hubei          112.5697       31.1700          115       170     2012      05        31        152              0.300458      25.670837       0.331123       0.284354   -9999.000000       0.194200       0.174900   -9999.000000
57378     57378     hubei          112.5697       31.1700          115       170     2012      06        01        153              0.296583      26.122314       2.067692       0.272159       0.356000   -9999.000000       0.186800   -9999.000000
57378     57378     hubei          112.5697       31.1700          115       170     2012      06        02        154              0.296667      23.205902       0.000000       0.277476       0.303000       0.223800       0.184700   -9999.000000
57378     57378     hubei          112.5697       31.1700          115       170     2012      06        03        155              0.294208      25.489380       0.466259       0.265970       0.326000   -9999.000000   -9999.000000       0.441000
57378     57378     hubei          112.5697       31.1700          115       170     2012      06        04        156              0.290042      25.313812       0.000000       0.261539       0.301000       0.140500   -9999.000000   -9999.000000
57378     57378     hubei          112.5697       31.1700          115       170     2012      06        05        157              0.291458      26.601105       5.223416       0.253702   -9999.000000       0.357100       0.183400       0.938000
57378     57378     hubei          112.5697       31.1700          115       170     2012      06        06        158              0.296167      25.941803       0.000000       0.267148       0.328000   -9999.000000       0.189500   -9999.000000
57378     57378     hubei          112.5697       31.1700          115       170     2012      06        07        159              0.292583      27.578979       0.000000       0.261232       0.309000       0.276400       0.184900   -9999.000000
57378     57378     hubei          112.5697       31.1700          115       170     2012      06        08        160              0.277625      29.010864       0.000000       0.249818       0.280500   -9999.000000       0.171500       0.513000
57378     57378     hubei          112.5697       31.1700          115       170     2012      06        09        161              0.255417      30.604614       0.172655       0.239163       0.246000       0.268300   -9999.000000   -9999.000000
57378     57378     hubei          112.5697       31.1700          115       170     2012      06        10        162              0.239125      31.291901       0.000000       0.230139   -9999.000000       0.262100   -9999.000000       0.494000
57378     57378     hubei          112.5697       31.1700          115       170     2012      06        11        163              0.000000      29.575287       0.000000       0.224602       0.312000   -9999.000000       0.165500   -9999.000000
57378     57378     hubei          112.5697       31.1700          115       170     2012      06        12        164              0.223208      27.917450       0.000000       0.218184       0.308000       0.149500       0.170800       0.250000
57378     57378     hubei          112.5697       31.1700          115       170     2012      06        13        165              0.214500      30.811890       0.000000       0.204677       0.295000   -9999.000000       0.168200       0.558000
57378     57378     hubei          112.5697       31.1700          115       170     2012      06        14        166              0.205625      31.802704       0.000000       0.191518       0.272000   -9999.000000   -9999.000000   -9999.000000
57378     57378     hubei          112.5697       31.1700          115       170     2012      06        15        167              0.202083      29.215942       0.381070       0.189323   -9999.000000       0.219600   -9999.000000       0.288000
57378     57378     hubei          112.5697       31.1700          115       170     2012      06        16        168              0.195292      30.122650       0.064050       0.180480       0.266000   -9999.000000       0.145300   -9999.000000
57378     57378     hubei          112.5697       31.1700          115       170     2012      06        17        169              0.190458      30.599670       0.000000       0.170875       0.258000       0.233400       0.155000       0.325000
57378     57378     hubei          112.5697       31.1700          115       170     2012      06        18        170              0.188417      30.144104       0.031873       0.162559       0.251000       0.271100       0.156100   -9999.000000
57378     57378     hubei          112.5697       31.1700          115       170     2012      06        19        171              0.187250      31.349121       0.121637       0.156068       0.255500   -9999.000000       0.149200   -9999.000000
57378     57378     hubei          112.5697       31.1700          115       170     2012      06        20        172              0.185208      33.021271       0.000000       0.148547       0.249000       0.368900   -9999.000000       0.204000
57378     57378     hubei          112.5697       31.1700          115       170     2012      06        21        173              0.183625      33.233398       0.000000       0.142282   -9999.000000   -9999.000000   -9999.000000   -9999.000000
57378     57378     hubei          112.5697       31.1700          115       170     2012      06        22        174              0.184042      33.819580       0.250961       0.139183       0.255000   -9999.000000       0.124900       0.271000
57378     57378     hubei          112.5697       31.1700          115       170     2012      06        23        175              0.183250      33.832825       0.000000       0.137139       0.247500       0.457100       0.139100   -9999.000000
57378     57378     hubei          112.5697       31.1700          115       170     2012      06        24        176              0.182958      34.593262       0.000000       0.133949       0.240500       0.127400       0.135800       0.378000
57378     57378     hubei          112.5697       31.1700          115       170     2012      06        25        177              0.181542      34.629456       1.616773       0.131017       0.220000       0.045400       0.089700       0.146000
57378     57378     hubei          112.5697       31.1700          115       170     2012      06        26        178              0.179542      32.588898      17.441881       0.133696   -9999.000000   -9999.000000   -9999.000000   -9999.000000
57378     57378     hubei          112.5697       31.1700          115       170     2012      06        27        179              0.204625      29.457245      23.968807       0.237372       0.340000       0.327000       0.119100       1.000000
57378     57378     hubei          112.5697       31.1700          115       170     2012      06        28        180              0.230458      26.217804       2.449389       0.307696       0.306500       0.407200       0.103700   -9999.000000
57378     57378     hubei          112.5697       31.1700          115       170     2012      06        29        181              0.234083      26.790527       7.632844       0.286918       0.265000   -9999.000000       0.103900       0.896000
57378     57378     hubei          112.5697       31.1700          115       170     2012      06        30        182              0.229583      28.856659       6.521925       0.278149       0.281000       0.360200       0.107000   -9999.000000
57378     57378     hubei          112.5697       31.1700          115       170     2012      07        01        183              0.226818      26.376038       0.074545       0.294308   -9999.000000   -9999.000000   -9999.000000   -9999.000000
57378     57378     hubei          112.5697       31.1700          115       170     2012      07        02        184              0.221708      27.648193       0.758083       0.273523       0.327000       0.177600   -9999.000000       0.713000
57378     57378     hubei          112.5697       31.1700          115       170     2012      07        03        185              0.212667      31.003967      13.922450       0.259989       0.297000       0.248300       0.148900   -9999.000000
57378     57378     hubei          112.5697       31.1700          115       170     2012      07        04        186              0.205583      31.330658       4.408570       0.251006       0.283000   -9999.000000       0.114400       0.492000
57378     57378     hubei          112.5697       31.1700          115       170     2012      07        05        187              0.201000      31.627197      14.811946       0.250596       0.332000       0.355000       0.169800   -9999.000000
57378     57378     hubei          112.5697       31.1700          115       170     2012      07        06        188              0.202000      28.013794       0.000000       0.298948   -9999.000000       0.270700       0.159000   -9999.000000
57378     57378     hubei          112.5697       31.1700          115       170     2012      07        07        189              0.202083      30.284454       0.000000       0.270183   -9999.000000   -9999.000000   -9999.000000       0.615000
57378     57378     hubei          112.5697       31.1700          115       170     2012      07        08        190              0.201167      32.311340       0.000000       0.254794       0.263000       0.214000   -9999.000000   -9999.000000
57378     57378     hubei          112.5697       31.1700          115       170     2012      07        09        191              0.200958      32.806366       0.000000       0.240854       0.264500   -9999.000000       0.174100       0.516000
57378     57378     hubei          112.5697       31.1700          115       170     2012      07        10        192              0.197167      33.146667       2.842770       0.227933       0.275500       0.166800       0.199200   -9999.000000
57378     57378     hubei          112.5697       31.1700          115       170     2012      07        11        193              0.197125      31.730682       0.519618       0.239057   -9999.000000       0.383100       0.194200       0.750000
57378     57378     hubei          112.5697       31.1700          115       170     2012      07        12        194              0.197000      31.954865       2.415208       0.236379   -9999.000000       0.224300   -9999.000000       0.584000
57378     57378     hubei          112.5697       31.1700          115       170     2012      07        13        195              0.281870      30.464233      28.272758       0.244230       0.370000       0.120200   -9999.000000   -9999.000000
57378     57378     hubei          112.5697       31.1700          115       170     2012      07        14        196              0.309833      27.739044       0.713642       0.311535       0.327500   -9999.000000       0.197000       0.676000
57378     57378     hubei          112.5697       31.1700          115       170     2012      07        15        197              0.306167      29.896179       1.026460       0.280679       0.335000       0.222400       0.192300   -9999.000000
57378     57378     hubei          112.5697       31.1700          115       170     2012      07        16        198              0.302583      29.421387       0.000000       0.268432       0.284000       0.404900       0.187100       0.553000
57378     57378     hubei          112.5697       31.1700          115       170     2012      07        17        199              0.292000      30.140533       0.000000       0.256577   -9999.000000   -9999.000000       0.188000   -9999.000000
57378     57378     hubei          112.5697       31.1700          115       170     2012      07        18        200              0.270125      30.409546       0.000000       0.246322       0.303000       0.131900   -9999.000000   -9999.000000
57378     57378     hubei          112.5697       31.1700          115       170     2012      07        19        201              0.249917      30.893127       0.506452       0.236545       0.305000   -9999.000000   -9999.000000       0.397000
57378     57378     hubei          112.5697       31.1700          115       170     2012      07        20        202              0.261583      31.441223       3.237323       0.230878       0.318500       0.086800       0.176000   -9999.000000
57378     57378     hubei          112.5697       31.1700          115       170     2012      07        21        203              0.274261      32.395844       0.000000       0.238502       0.426500       0.252300       0.165700       0.416000
57378     57378     hubei          112.5697       31.1700          115       170     2012      07        22        204              0.255708      33.231293       0.000000       0.230881       0.421000   -9999.000000       0.182400   -9999.000000
57378     57378     hubei          112.5697       31.1700          115       170     2012      07        23        205              0.266292      31.481750       5.290174       0.218173   -9999.000000       0.145000       0.223700       0.911000
57378     57378     hubei          112.5697       31.1700          115       170     2012      07        24        206              0.289167      31.882324       1.158744       0.235177       0.443000       0.102100   -9999.000000       0.594000
57378     57378     hubei          112.5697       31.1700          115       170     2012      07        25        207              0.275667      31.913422       0.792393       0.234586       0.429500   -9999.000000   -9999.000000   -9999.000000
57378     57378     hubei          112.5697       31.1700          115       170     2012      07        26        208              0.253333      33.226349       0.379438       0.218878       0.416000       0.250600       0.212200       0.555000
57378     57378     hubei          112.5697       31.1700          115       170     2012      07        27        209              0.231500      33.560059       1.153427       0.204612       0.394000   -9999.000000       0.226100   -9999.000000
57378     57378     hubei          112.5697       31.1700          115       170     2012      07        28        210              0.222000      33.955475       0.379672       0.190996   -9999.000000       0.159000       0.227600       0.474000
57378     57378     hubei          112.5697       31.1700          115       170     2012      07        29        211              0.221083      33.826050       0.000000       0.183545       0.398000       0.127600   -9999.000000   -9999.000000
57378     57378     hubei          112.5697       31.1700          115       170     2012      07        30        212              0.218292      34.617554       0.000000       0.170788       0.411500       0.122500   -9999.000000   -9999.000000
57378     57378     hubei          112.5697       31.1700          115       170     2012      07        31        213              0.217500      35.678192       1.166583       0.158271       0.418000       0.146000       0.215600       0.526000
57378     57378     hubei          112.5697       31.1700          115       170     2012      08        01        214              0.215167      35.319824       2.450032       0.157806       0.355000   -9999.000000       0.223300   -9999.000000
57378     57378     hubei          112.5697       31.1700          115       170     2012      08        02        215              0.215792      32.491730       0.000000       0.156922   -9999.000000       0.101000       0.225300       0.375000
57378     57378     hubei          112.5697       31.1700          115       170     2012      08        03        216              0.216542      32.508636       0.000000       0.147461       0.406000       0.217200       0.226200   -9999.000000
57378     57378     hubei          112.5697       31.1700          115       170     2012      08        04        217              0.217625      32.663116       9.460169       0.139792       0.416000   -9999.000000   -9999.000000   -9999.000000
57378     57378     hubei          112.5697       31.1700          115       170     2012      08        05        218              0.245250      29.938751       2.424821       0.166889       0.409000       0.090700   -9999.000000       0.651000
57378     57378     hubei          112.5697       31.1700          115       170     2012      08        06        219              0.240292      29.906769       0.702716       0.248483       0.400500   -9999.000000       0.164300   -9999.000000
57378     57378     hubei          112.5697       31.1700          115       170     2012      08        07        220              0.231708      31.578064       0.000000       0.212468       0.344000       0.210900       0.172100       0.459000
57378     57378     hubei          112.5697       31.1700          115       170     2012      08        08        221              0.226792      32.267059       0.000000       0.190865   -9999.000000       0.171100       0.166600   -9999.000000
57378     57378     hubei          112.5697       31.1700          115       170     2012      08        09        222              0.224458      32.142242       0.000000       0.173702       0.387000   -9999.000000       0.170700       0.342000
57378     57378     hubei          112.5697       31.1700          115       170     2012      08        10        223              0.223375      32.208282       0.000000       0.158980       0.395500       0.177700   -9999.000000       0.559000
57378     57378     hubei          112.5697       31.1700          115       170     2012      08        11        224              0.222708      32.145691       0.000000       0.147572       0.323500       0.072300   -9999.000000   -9999.000000
57378     57378     hubei          112.5697       31.1700          115       170     2012      08        12        225              0.232542      32.007599       1.892693       0.141453       0.291000   -9999.000000       0.164000       0.351000
57378     57378     hubei          112.5697       31.1700          115       170     2012      08        13        226              0.240292      35.127197       0.000000       0.135303   -9999.000000       0.178300       0.159800   -9999.000000
57378     57378     hubei          112.5697       31.1700          115       170     2012      08        14        227              0.233083      32.098724       0.076940       0.131419       0.326000   -9999.000000       0.152800       0.359000
57378     57378     hubei          112.5697       31.1700          115       170     2012      08        15        228              0.230125      31.420044       0.491555       0.128155       0.296500   -9999.000000   -9999.000000   -9999.000000
57378     57378     hubei          112.5697       31.1700          115       170     2012      08        16        229              0.229167      31.580292       0.000000       0.126574       0.322000       0.091500   -9999.000000   -9999.000000
57378     57378     hubei          112.5697       31.1700          115       170     2012      08        17        230              0.230167      33.231781       0.000000       0.122213       0.326500       0.184900       0.144400       0.237000
57378     57378     hubei          112.5697       31.1700          115       170     2012      08        18        231              0.230583      35.435516       0.000000       0.119263       0.297000       0.040000       0.149300   -9999.000000
57378     57378     hubei          112.5697       31.1700          115       170     2012      08        19        232              0.239000      36.640656      26.466034       0.117984   -9999.000000   -9999.000000       0.157800       0.455000
57378     57378     hubei          112.5697       31.1700          115       170     2012      08        20        233              0.284208      34.203369      45.189407       0.228883   -9999.000000       0.174100       0.200200   -9999.000000
57378     57378     hubei          112.5697       31.1700          115       170     2012      08        21        234              0.324833      29.406097       7.094658       0.312414       0.331500       0.228600   -9999.000000       1.000000
57378     57378     hubei          112.5697       31.1700          115       170     2012      08        22        235              0.318042      26.178192       5.201794       0.311046       0.312500   -9999.000000   -9999.000000   -9999.000000
57378     57378     hubei          112.5697       31.1700          115       170     2012      08        23        236              0.314417      25.136566       0.000000       0.281110       0.282000       0.068300       0.182100   -9999.000000
57378     57378     hubei          112.5697       31.1700          115       170     2012      08        24        237              0.309083      25.478180       0.454424       0.266791   -9999.000000   -9999.000000       0.198100       0.666000
57378     57378     hubei          112.5697       31.1700          115       170     2012      08        25        238              0.000000      26.642639       0.000000       0.256870       0.294000       0.131300       0.190000   -9999.000000
57378     57378     hubei          112.5697       31.1700          115       170     2012      08        26        239              0.289875      28.022125       0.146309       0.248155       0.299500       0.205700       0.190300       0.532000
57378     57378     hubei          112.5697       31.1700          115       170     2012      08        27        240              0.281000      26.226440       0.535781       0.244628       0.303500   -9999.000000   -9999.000000   -9999.000000
57378     57378     hubei          112.5697       31.1700          115       170     2012      08        28        241              0.269125      27.994141       0.000000       0.239406       0.287000       0.241800       0.134700   -9999.000000
57378     57378     hubei          112.5697       31.1700          115       170     2012      08        29        242              0.256083      29.425568       0.000000       0.230937   -9999.000000   -9999.000000       0.126600       0.539000
57378     57378     hubei          112.5697       31.1700          115       170     2012      08        30        243              0.247750      30.995544       0.086531       0.221936   -9999.000000       0.083900       0.131300   -9999.000000
57378     57378     hubei          112.5697       31.1700          115       170     2012      08        31        244              0.243750      30.742126       0.000000       0.215782       0.316000       0.278600       0.135600       0.385000
57378     57378     hubei          112.5697       31.1700          115       170     2012      09        01        245              0.245167      29.434204      34.652569       0.215983       0.246000   -9999.000000   -9999.000000   -9999.000000
57378     57378     hubei          112.5697       31.1700          115       170     2012      09        02        246              0.321417      31.162384       6.055062       0.251453       0.280000       0.394500   -9999.000000   -9999.000000
57378     57378     hubei          112.5697       31.1700          115       170     2012      09        03        247              0.315708      24.925385       0.000000       0.310395       0.260000       0.187300       0.158800       0.683000
57378     57378     hubei          112.5697       31.1700          115       170     2012      09        04        248              0.309042      26.344818       0.000000       0.276102   -9999.000000       0.212600       0.167400   -9999.000000
57378     57378     hubei          112.5697       31.1700          115       170     2012      09        05        249              0.293875      27.384705       0.000000       0.261929       0.263000       0.274700       0.158300       0.471000
57378     57378     hubei          112.5697       31.1700          115       170     2012      09        06        250              0.279083      27.190399       2.339131       0.250385       0.282000   -9999.000000       0.160600   -9999.000000
57378     57378     hubei          112.5697       31.1700          115       170     2012      09        07        251              0.272333      27.221313      10.018011       0.251404       0.288500       0.270800   -9999.000000       0.538000
57378     57378     hubei          112.5697       31.1700          115       170     2012      09        08        252              0.288000      28.134857      20.242722       0.271130       0.325000       0.161800   -9999.000000       0.894000
57378     57378     hubei          112.5697       31.1700          115       170     2012      09        09        253              0.316708      24.409912       0.000000       0.314307   -9999.000000   -9999.000000       0.166800   -9999.000000
57378     57378     hubei          112.5697       31.1700          115       170     2012      09        10        254              0.311417      25.690552       0.000000       0.285993       0.292000       0.224400       0.195900       0.583000
57378     57378     hubei          112.5697       31.1700          115       170     2012      09        11        255              0.313000      26.431732      11.822505       0.273401       0.262000   -9999.000000       0.207800   -9999.000000
57378     57378     hubei          112.5697       31.1700          115       170     2012      09        12        256              0.327958      24.872650       3.854666       0.283550       0.259000       0.252100       0.204200       0.954000
57378     57378     hubei          112.5697       31.1700          115       170     2012      09        13        257              0.320783      22.567627       0.050574       0.298736       0.213000       0.317100   -9999.000000   -9999.000000
57378     57378     hubei          112.5697       31.1700          115       170     2012      09        14        258              0.314708      22.408295       0.000000       0.277187       0.228000   -9999.000000       0.186200   -9999.000000
57378     57378     hubei          112.5697       31.1700          115       170     2012      09        15        259              0.308125      23.245575       0.000000       0.265818   -9999.000000       0.236200       0.176800       0.349000
57378     57378     hubei          112.5697       31.1700          115       170     2012      09        16        260              0.300750      23.598755       0.000000       0.257866       0.212000   -9999.000000       0.181600   -9999.000000
57378     57378     hubei          112.5697       31.1700          115       170     2012      09        17        261              0.290542      23.588928       0.000000       0.253271       0.223000   -9999.000000       0.144700       0.557000
57378     57378     hubei          112.5697       31.1700          115       170     2012      09        18        262              0.279125      23.721497       0.000000       0.247247       0.216000       0.208700   -9999.000000   -9999.000000
57378     57378     hubei          112.5697       31.1700          115       170     2012      09        19        263              0.270333      24.694550       0.000000       0.242710       0.223000   -9999.000000   -9999.000000       0.501000
57378     57378     hubei          112.5697       31.1700          115       170     2012      09        20        264              0.261583      25.956024       0.274470       0.237477   -9999.000000       0.193900       0.131000       0.654000
57378     57378     hubei          112.5697       31.1700          115       170     2012      09        21        265              0.255917      26.663574       0.471549       0.232155   -9999.000000       0.183700       0.140300   -9999.000000
57378     57378     hubei          112.5697       31.1700          115       170     2012      09        22        266              0.252458      24.213867       0.371149       0.235618       0.193000       0.093600       0.147500       0.584000
57378     57378     hubei          112.5697       31.1700          115       170     2012      09        23        267              0.250042      26.030182       0.370231       0.231233       0.195500       0.165000       0.144000   -9999.000000
57378     57378     hubei          112.5697       31.1700          115       170     2012      09        24        268              0.247250      25.040222       0.000000       0.230311       0.199000   -9999.000000   -9999.000000       0.441000
57378     57378     hubei          112.5697       31.1700          115       170     2012      09        25        269              0.245167      26.202148       0.349848       0.222778       0.203000       0.236400   -9999.000000   -9999.000000
57378     57378     hubei          112.5697       31.1700          115       170     2012      09        26        270              0.243875      25.188293       0.107253       0.221466   -9999.000000       0.179500       0.100100   -9999.000000
57378     57378     hubei          112.5697       31.1700          115       170     2012      09        27        271              0.244500      24.655518       0.000000       0.220585       0.188000       0.110700       0.104100       0.496000
57378     57378     hubei          112.5697       31.1700          115       170     2012      09        28        272              0.240000      25.291565       0.000000       0.215779       0.188500   -9999.000000       0.109400   -9999.000000
57378     57378     hubei          112.5697       31.1700          115       170     2012      09        29        273              0.237833      22.371124       0.000000       0.204670       0.186000   -9999.000000   -9999.000000       0.317000
57378     57378     hubei          112.5697       31.1700          115       170     2012      09        30        274              0.235292      22.217896       0.000000       0.199898       0.202000       0.078900   -9999.000000   -9999.000000
57378     57378     hubei          112.5697       31.1700          115       170     2012      10        01        275              0.233917      21.232239       0.000000       0.197809   -9999.000000       0.174100       0.082900   -9999.000000
57378     57378     hubei          112.5697       31.1700          115       170     2012      10        02        276              0.233750      22.511444       0.274616       0.192358       0.188000   -9999.000000       0.090500       0.442000
57378     57378     hubei          112.5697       31.1700          115       170     2012      10        03        277              0.232083      23.616516       0.000000       0.189861       0.192500       0.179100       0.090800   -9999.000000
57378     57378     hubei          112.5697       31.1700          115       170     2012      10        04        278              0.230542      21.974152       0.696213       0.191833       0.202500   -9999.000000       0.091700       0.417000
57378     57378     hubei          112.5697       31.1700          115       170     2012      10        05        279              0.229333      22.923798       1.978910       0.194045   -9999.000000       0.160700   -9999.000000   -9999.000000
57378     57378     hubei          112.5697       31.1700          115       170     2012      10        06        280              0.231542      20.363098       0.415771       0.220147   -9999.000000       0.151600   -9999.000000       0.693000
57378     57378     hubei          112.5697       31.1700          115       170     2012      10        07        281              0.231625      22.328583       0.920892       0.214573       0.201000   -9999.000000       0.087700       0.541000
57378     57378     hubei          112.5697       31.1700          115       170     2012      10        08        282              0.233083      21.376007       0.197352       0.221710       0.201000       0.367100       0.078600   -9999.000000
57378     57378     hubei          112.5697       31.1700          115       170     2012      10        09        283              0.233875      21.932800       0.000000       0.217378       0.194000       0.248100       0.077400       0.357000
57378     57378     hubei          112.5697       31.1700          115       170     2012      10        10        284              0.232958      22.745575       0.000000       0.208875       0.192500       0.088300       0.074100   -9999.000000
57378     57378     hubei          112.5697       31.1700          115       170     2012      10        11        285              0.232292      22.248077       0.000000       0.201082       0.151000       0.131900   -9999.000000       0.235000
57378     57378     hubei          112.5697       31.1700          115       170     2012      10        12        286              0.230625      21.272125       0.025277       0.200535   -9999.000000   -9999.000000   -9999.000000   -9999.000000
57378     57378     hubei          112.5697       31.1700          115       170     2012      10        13        287              0.229500      20.374969       0.303163       0.201572       0.153000       0.164100       0.069200   -9999.000000
57378     57378     hubei          112.5697       31.1700          115       170     2012      10        14        288              0.230417      20.391052       0.409958       0.202204       0.156500       0.167700       0.075900       0.264000
57378     57378     hubei          112.5697       31.1700          115       170     2012      10        15        289              0.276417      22.295868      13.875032       0.199142       0.192500       0.231200       0.138000   -9999.000000
57378     57378     hubei          112.5697       31.1700          115       170     2012      10        16        290              0.293667      19.556122       0.377445       0.270018       0.177000       0.281400   -9999.000000       0.703000
57378     57378     hubei          112.5697       31.1700          115       170     2012      10        17        291              0.291167      18.119354       0.000000       0.254505   -9999.000000   -9999.000000   -9999.000000   -9999.000000
57378     57378     hubei          112.5697       31.1700          115       170     2012      10        18        292              0.289625      18.646301       0.000000       0.239957       0.153000       0.142100       0.101400       0.489000
57378     57378     hubei          112.5697       31.1700          115       170     2012      10        19        293              0.287913      19.453827       0.000000       0.232090       0.156500       0.200600       0.105600       0.443000
57378     57378     hubei          112.5697       31.1700          115       170     2012      10        20        294              0.286708      20.943909       0.000000       0.227642       0.149500   -9999.000000       0.107200   -9999.000000
57378     57378     hubei          112.5697       31.1700          115       170     2012      10        21        295              0.287917      22.396790       7.181775       0.223890       0.194500       0.204300       0.110100       0.606000
57378     57378     hubei          112.5697       31.1700          115       170     2012      10        22        296              0.286917      20.895691       0.000000       0.247080   -9999.000000   -9999.000000   -9999.000000   -9999.000000
57378     57378     hubei          112.5697       31.1700          115       170     2012      10        23        297              0.281833      16.817688       0.367192       0.249159   -9999.000000   -9999.000000   -9999.000000       0.373000
57378     57378     hubei          112.5697       31.1700          115       170     2012      10        24        298              0.278917      17.444946       0.000000       0.239720   -9999.000000       0.284000       0.074200   -9999.000000
57378     57378     hubei          112.5697       31.1700          115       170     2012      10        25        299              0.000000      16.326691       4.065630       0.238002       0.205000   -9999.000000       0.087700   -9999.000000
57378     57378     hubei          112.5697       31.1700          115       170     2012      10        26        300              0.312042      16.618073       4.368904       0.247212       0.227000       0.285100       0.102900       0.869000
57378     57378     hubei          112.5697       31.1700          115       170     2012      10        27        301              0.308417      15.897125       0.000000       0.270973       0.193000       0.207100       0.091600   -9999.000000
57378     57378     hubei          112.5697       31.1700          115       170     2012      10        28        302              0.000000      18.122650       6.003867       0.254094   -9999.000000       0.137000   -9999.000000       0.486000
57378     57378     hubei          112.5697       31.1700          115       170     2012      10        29        303              0.319458      19.944763       8.515020       0.255202   -9999.000000       0.144100       0.128500   -9999.000000
57378     57378     hubei          112.5697       31.1700          115       170     2012      10        30        304              0.309958      16.314362       4.654519       0.291824       0.192000   -9999.000000       0.115500   -9999.000000
57378     57378     hubei          112.5697       31.1700          115       170     2012      10        31        305              0.305792      15.821625       0.000000       0.269007       0.175000       0.173600       0.115500       0.499000
57378     57378     hubei          112.5697       31.1700          115       170     2012      11        01        306              0.303292      16.005615       0.000000       0.260152       0.173000       0.175100       0.118000   -9999.000000
57378     57378     hubei          112.5697       31.1700          115       170     2012      11        02        307              0.301917      15.654388       6.217656       0.255321   -9999.000000   -9999.000000   -9999.000000       0.467000
57378     57378     hubei          112.5697       31.1700          115       170     2012      11        03        308              0.311708      17.124023       6.868993       0.260036   -9999.000000       0.215500   -9999.000000   -9999.000000
57378     57378     hubei          112.5697       31.1700          115       170     2012      11        04        309              0.304913      12.524841       0.000000       0.289686       0.172000   -9999.000000       0.109900       0.714000
57378     57378     hubei          112.5697       31.1700          115       170     2012      11        05        310              0.301708      13.684052       0.000000       0.269678       0.180000       0.193000       0.115600       0.420000
57378     57378     hubei          112.5697       31.1700          115       170     2012      11        06        311              0.299625      13.080475       0.000000       0.262195       0.170000       0.150300       0.113700   -9999.000000
57378     57378     hubei          112.5697       31.1700          115       170     2012      11        07        312              0.298625      13.423828       0.180092       0.257695       0.200000   -9999.000000       0.122000       0.452000
57378     57378     hubei          112.5697       31.1700          115       170     2012      11        08        313              0.298667      12.751099       0.185355       0.257050   -9999.000000       0.197600   -9999.000000   -9999.000000
57378     57378     hubei          112.5697       31.1700          115       170     2012      11        09        314              0.297375      12.800293       0.207324       0.256096       0.221000   -9999.000000   -9999.000000       0.632000
57378     57378     hubei          112.5697       31.1700          115       170     2012      11        10        315              0.296583      11.989685       0.000000       0.255867       0.191000   -9999.000000       0.097400   -9999.000000
57378     57378     hubei          112.5697       31.1700          115       170     2012      11        11        316              0.293042      12.078674       0.000000       0.253538       0.150000       0.186100       0.110500   -9999.000000
57378     57378     hubei          112.5697       31.1700          115       170     2012      11        12        317              0.290458      11.633453       0.000000       0.249363       0.154000   -9999.000000       0.141800       0.353000
57378     57378     hubei          112.5697       31.1700          115       170     2012      11        13        318              0.000000      12.196594       0.000000       0.247601   -9999.000000       0.198300   -9999.000000   -9999.000000
57378     57378     hubei          112.5697       31.1700          115       170     2012      11        14        319              0.287333      14.352997       0.784085       0.246159       0.181000       0.083800   -9999.000000       0.378000
57378     57378     hubei          112.5697       31.1700          115       170     2012      11        15        320              0.285792      12.602142       5.242068       0.245511   -9999.000000       0.101900       0.153100   -9999.000000
57378     57378     hubei          112.5697       31.1700          115       170     2012      11        16        321              0.287625       9.167328       0.597952       0.265020   -9999.000000       0.261000       0.143300       0.577000
57378     57378     hubei          112.5697       31.1700          115       170     2012      11        17        322              0.000000      11.320770       0.000000       0.260626   -9999.000000   -9999.000000       0.148400       0.844000
57378     57378     hubei          112.5697       31.1700          115       170     2012      11        18        323              0.286083       9.906189       0.261399       0.256615   -9999.000000       0.090700       0.145100   -9999.000000
57378     57378     hubei          112.5697       31.1700          115       170     2012      11        19        324              0.285833      10.354767       0.157050       0.254552   -9999.000000       0.181200   -9999.000000       0.612000
57378     57378     hubei          112.5697       31.1700          115       170     2012      11        20        325              0.285375      11.849396       1.671203       0.252399   -9999.000000       0.093000   -9999.000000   -9999.000000
57378     57378     hubei          112.5697       31.1700          115       170     2012      11        21        326              0.285958      10.524109       0.000000       0.258679       0.165000       0.173900       0.089700       0.659000
57378     57378     hubei          112.5697       31.1700          115       170     2012      11        22        327              0.284833      10.973267       0.000000       0.255396   -9999.000000   -9999.000000       0.099100   -9999.000000
57378     57378     hubei          112.5697       31.1700          115       170     2012      11        23        328              0.282000      10.469788       0.000000       0.253015   -9999.000000       0.141500       0.094800   -9999.000000
57378     57378     hubei          112.5697       31.1700          115       170     2012      11        24        329              0.279667       7.959869       1.852805       0.250432   -9999.000000       0.081100       0.109000       0.566000
57378     57378     hubei          112.5697       31.1700          115       170     2012      11        25        330              0.282000       8.345398       1.043032       0.255349   -9999.000000   -9999.000000   -9999.000000   -9999.000000
57378     57378     hubei          112.5697       31.1700          115       170     2012      11        26        331              0.280208       7.236389       0.165860       0.262137       0.153000       0.208400   -9999.000000       0.433000
57378     57378     hubei          112.5697       31.1700          115       170     2012      11        27        332              0.278917       8.915771       0.000000       0.254734   -9999.000000   -9999.000000       0.091200   -9999.000000
57378     57378     hubei          112.5697       31.1700          115       170     2012      11        28        333              0.277708       9.373322       0.425294       0.251949   -9999.000000       0.285100       0.099200   -9999.000000
57378     57378     hubei          112.5697       31.1700          115       170     2012      11        29        334              0.274458       8.724915       0.592875       0.250235   -9999.000000       0.136200       0.117300       0.547000
57378     57378     hubei          112.5697       31.1700          115       170     2012      11        30        335              0.274125       8.030090       0.721135       0.251759       0.191000   -9999.000000   -9999.000000   -9999.000000
57378     57378     hubei          112.5697       31.1700          115       170     2012      12        01        336              0.272375       8.729797       0.674997       0.252042   -9999.000000       0.134200   -9999.000000       0.502000
57378     57378     hubei          112.5697       31.1700          115       170     2012      12        02        337              0.271708       4.458740       0.000000       0.256411   -9999.000000       0.172400       0.096700   -9999.000000
57378     57378     hubei          112.5697       31.1700          115       170     2012      12        03        338              0.271583       5.721252       0.127019       0.253312   -9999.000000       0.075700       0.123400       0.357000
57378     57378     hubei          112.5697       31.1700          115       170     2012      12        04        339              0.270333       7.263397       0.464965       0.251566   -9999.000000       0.131700       0.124400       0.369000
57378     57378     hubei          112.5697       31.1700          115       170     2012      12        05        340              0.269083       6.280212       0.400067       0.252111   -9999.000000   -9999.000000       0.130900   -9999.000000
57378     57378     hubei          112.5697       31.1700          115       170     2012      12        06        341              0.267542       8.272705       0.431422       0.250318   -9999.000000       0.155900   -9999.000000       0.215000
57378     57378     hubei          112.5697       31.1700          115       170     2012      12        07        342              0.266292       7.944214       1.085382       0.249601       0.136000       0.145200   -9999.000000   -9999.000000
57378     57378     hubei          112.5697       31.1700          115       170     2012      12        08        343              0.264000       9.366852       0.458123       0.251852   -9999.000000       0.071400       0.112900       0.207000
57378     57378     hubei          112.5697       31.1700          115       170     2012      12        09        344              0.261458       8.401703       0.499478       0.248747   -9999.000000       0.086200       0.130300   -9999.000000
57378     57378     hubei          112.5697       31.1700          115       170     2012      12        10        345              0.259167       7.142059       0.933659       0.248570   -9999.000000   -9999.000000       0.088200   -9999.000000
57378     57378     hubei          112.5697       31.1700          115       170     2012      12        11        346              0.256792       5.692383       0.000000       0.250589   -9999.000000       0.152600       0.090500       0.145000
57378     57378     hubei          112.5697       31.1700          115       170     2012      12        12        347              0.255375       5.742188       0.975269       0.248063       0.154000       0.122800   -9999.000000   -9999.000000
57378     57378     hubei          112.5697       31.1700          115       170     2012      12        13        348              0.263250       5.201172       3.864319       0.249208   -9999.000000   -9999.000000       0.101600       0.675000
57378     57378     hubei          112.5697       31.1700          115       170     2012      12        14        349              0.271292       4.536682       0.725180       0.269072   -9999.000000       0.151400       0.092800   -9999.000000
57378     57378     hubei          112.5697       31.1700          115       170     2012      12        15        350              0.000000       4.492462       0.000000       0.262858   -9999.000000   -9999.000000       0.095500       0.416000
57378     57378     hubei          112.5697       31.1700          115       170     2012      12        16        351              0.273208       5.991028       0.000000       0.258208   -9999.000000       0.185100       0.096000       0.659000
57378     57378     hubei          112.5697       31.1700          115       170     2012      12        17        352              0.286167       5.910583      14.586576       0.255693   -9999.000000       0.105100   -9999.000000   -9999.000000
57378     57378     hubei          112.5697       31.1700          115       170     2012      12        18        353              0.290625       4.621826       0.209461       0.292543   -9999.000000   -9999.000000   -9999.000000       0.500000
57378     57378     hubei          112.5697       31.1700          115       170     2012      12        19        354              0.288917       4.881683       1.006366       0.280134   -9999.000000       0.080500       0.129500   -9999.000000
57378     57378     hubei          112.5697       31.1700          115       170     2012      12        20        355              0.000000       5.239410       0.043397       0.274599   -9999.000000       0.134000       0.120200       0.512000
57378     57378     hubei          112.5697       31.1700          115       170     2012      12        21        356              0.289500       2.401947       0.503917       0.269096   -9999.000000   -9999.000000       0.130600   -9999.000000
57378     57378     hubei          112.5697       31.1700          115       170     2012      12        22        357              0.287875       4.076996       0.000000       0.268605   -9999.000000   -9999.000000       0.130300   -9999.000000
57378     57378     hubei          112.5697       31.1700          115       170     2012      12        23        358              0.286042       4.211182       3.706198       0.263669   -9999.000000   -9999.000000   -9999.000000       0.067000
57378     57378     hubei          112.5697       31.1700          115       170     2012      12        24        359              0.285000       3.374390       0.000000       0.251449   -9999.000000       0.191900   -9999.000000   -9999.000000
57378     57378     hubei          112.5697       31.1700          115       170     2012      12        25        360              0.283417       4.072479       0.000000       0.255988   -9999.000000       0.130000       0.114800       0.018000
57378     57378     hubei          112.5697       31.1700          115       170     2012      12        26        361              0.000000       1.327362       0.000000       0.237088   -9999.000000       0.038200       0.132000   -9999.000000
57378     57378     hubei          112.5697       31.1700          115       170     2012      12        27        362              0.288636       0.456635       2.154158       0.202938   -9999.000000       0.182000       0.146000   -9999.000000
57378     57378     hubei          112.5697       31.1700          115       170     2012      12        28        363              0.289000       1.075409       6.060141       0.232649   -9999.000000   -9999.000000       0.151500       0.613000
57378     57378     hubei          112.5697       31.1700          115       170     2012      12        29        364              0.000000       1.371277       1.691599       0.251382   -9999.000000       0.191100   -9999.000000   -9999.000000
57378     57378     hubei          112.5697       31.1700          115       170     2012      12        30        365              0.000000       1.263641       0.069082       0.256945   -9999.000000       0.290800       0.120400       0.005000
57378     57378     hubei          112.5697       31.1700          115       170     2012      12        31        366              0.289600       2.345367       0.000000       0.246256   -9999.000000   -9999.000000       0.140700   -9999.000000
