# Supplementary material for: Research on Fusing Multisatellite Soil Moisture Data Based on Bayesian Model Averaging
Source: Hindawi journal article supplement (doi:10.1155/2018/9310838), 2018-06-25
Supplement: f1 [file 9310838.f1.zip › 2012_sm00-10cm_daily_ZDB_ZHY_57381_366days_allin.txt]

57381     57381     hubei          113.3383       31.6192          114       173     2012      01        01        001              0.000000   -9999.000000       0.000000   -9999.000000       0.125000   -9999.000000       0.082700   -9999.000000
57381     57381     hubei          113.3383       31.6192          114       173     2012      01        02        002              0.240792       2.821747       0.000000       0.255245       0.123000       0.110700       0.112100   -9999.000000
57381     57381     hubei          113.3383       31.6192          114       173     2012      01        03        003              0.000000       3.046204       0.000000       0.275534       0.120000       0.093100   -9999.000000       0.001000
57381     57381     hubei          113.3383       31.6192          114       173     2012      01        04        004              0.240208       2.078583       0.000000       0.239121   -9999.000000   -9999.000000       0.108000   -9999.000000
57381     57381     hubei          113.3383       31.6192          114       173     2012      01        05        005              0.242125       1.908051       0.000000       0.221552   -9999.000000       0.056900       0.100700       0.110000
57381     57381     hubei          113.3383       31.6192          114       173     2012      01        06        006              0.240478       1.523682       0.000000       0.223711       0.124000   -9999.000000       0.107600   -9999.000000
57381     57381     hubei          113.3383       31.6192          114       173     2012      01        07        007              0.242083       2.804382       0.000000       0.232569       0.127000   -9999.000000       0.107500       0.165000
57381     57381     hubei          113.3383       31.6192          114       173     2012      01        08        008              0.000000       2.090302       0.000000       0.247688       0.118000   -9999.000000   -9999.000000   -9999.000000
57381     57381     hubei          113.3383       31.6192          114       173     2012      01        09        009              0.240000       3.590363       0.000000       0.262434   -9999.000000   -9999.000000   -9999.000000   -9999.000000
57381     57381     hubei          113.3383       31.6192          114       173     2012      01        10        010              0.240000       5.110229       0.000000       0.265496   -9999.000000       0.132500       0.070000       0.141000
57381     57381     hubei          113.3383       31.6192          114       173     2012      01        11        011              0.240000       3.737244       0.000000       0.262621   -9999.000000   -9999.000000       0.072000   -9999.000000
57381     57381     hubei          113.3383       31.6192          114       173     2012      01        12        012              0.240000       2.591095       0.000000       0.259274       0.154000   -9999.000000       0.070500       0.092000
57381     57381     hubei          113.3383       31.6192          114       173     2012      01        13        013              0.240522       2.458771       1.766697       0.252158       0.150000       0.146800       0.076200   -9999.000000
57381     57381     hubei          113.3383       31.6192          114       173     2012      01        14        014              0.241542       2.544922       1.741255       0.259145       0.167000   -9999.000000   -9999.000000   -9999.000000
57381     57381     hubei          113.3383       31.6192          114       173     2012      01        15        015              0.241000       2.194580       0.000000       0.272648   -9999.000000       0.244200   -9999.000000       0.249000
57381     57381     hubei          113.3383       31.6192          114       173     2012      01        16        016              0.241000       3.598175       0.000000       0.269837       0.148000   -9999.000000       0.053900   -9999.000000
57381     57381     hubei          113.3383       31.6192          114       173     2012      01        17        017              0.000000       4.492920       2.201606       0.269203       0.160000   -9999.000000       0.064000       0.293000
57381     57381     hubei          113.3383       31.6192          114       173     2012      01        18        018              0.241500       3.222961       0.032553       0.276509       0.160000       0.092000       0.059200   -9999.000000
57381     57381     hubei          113.3383       31.6192          114       173     2012      01        19        019              0.241478       3.459259       0.930792       0.272908       0.157000   -9999.000000       0.063400   -9999.000000
57381     57381     hubei          113.3383       31.6192          114       173     2012      01        20        020              0.242682       3.489258       3.268944       0.273661   -9999.000000       0.140000   -9999.000000       0.539000
57381     57381     hubei          113.3383       31.6192          114       173     2012      01        21        021              0.242333       3.201843       0.584060       0.280576   -9999.000000   -9999.000000       0.057200   -9999.000000
57381     57381     hubei          113.3383       31.6192          114       173     2012      01        22        022              0.241429       1.169769       0.689027       0.229453   -9999.000000   -9999.000000       0.051000       0.081000
57381     57381     hubei          113.3383       31.6192          114       173     2012      01        23        023              0.241474       0.229401       0.357705       0.196242       0.142000       0.074900       0.071600   -9999.000000
57381     57381     hubei          113.3383       31.6192          114       173     2012      01        24        024              0.240933       1.095947       0.000000       0.208607       0.138000   -9999.000000   -9999.000000       0.120000
57381     57381     hubei          113.3383       31.6192          114       173     2012      01        25        025              0.241167       1.646118       0.000000       0.214435   -9999.000000       0.281000   -9999.000000       0.154000
57381     57381     hubei          113.3383       31.6192          114       173     2012      01        26        026              0.241333       2.355804       0.000000       0.217917   -9999.000000       0.057500   -9999.000000   -9999.000000
57381     57381     hubei          113.3383       31.6192          114       173     2012      01        27        027              0.249579       3.345032       1.721416       0.234897   -9999.000000   -9999.000000       0.074400       0.058000
57381     57381     hubei          113.3383       31.6192          114       173     2012      01        28        028              0.242348       1.627991       0.000000       0.237670       0.140000       0.208100       0.078400   -9999.000000
57381     57381     hubei          113.3383       31.6192          114       173     2012      01        29        029              0.243318       4.484344       1.096024       0.250761   -9999.000000   -9999.000000       0.079100       0.285000
57381     57381     hubei          113.3383       31.6192          114       173     2012      01        30        030              0.240818       2.934143       0.000000       0.263892   -9999.000000       0.163500       0.091400   -9999.000000
57381     57381     hubei          113.3383       31.6192          114       173     2012      01        31        031              0.241875       3.767029       0.063638       0.254204   -9999.000000       0.069200   -9999.000000   -9999.000000
57381     57381     hubei          113.3383       31.6192          114       173     2012      02        01        032              0.242667       5.871490       0.000000       0.260175   -9999.000000   -9999.000000   -9999.000000       0.008000
57381     57381     hubei          113.3383       31.6192          114       173     2012      02        02        033              0.239750       2.395874       1.903694       0.250499       0.141000       0.274100       0.076400   -9999.000000
57381     57381     hubei          113.3383       31.6192          114       173     2012      02        03        034              0.241727       3.018951       0.000000       0.231559       0.136000   -9999.000000       0.089000       0.077000
57381     57381     hubei          113.3383       31.6192          114       173     2012      02        04        035              0.243130       4.062408       0.000000       0.237427       0.143000       0.110900       0.093000   -9999.000000
57381     57381     hubei          113.3383       31.6192          114       173     2012      02        05        036              0.240583       2.469879       0.182964       0.254008   -9999.000000       0.164800       0.097700       0.261000
57381     57381     hubei          113.3383       31.6192          114       173     2012      02        06        037              0.240238       5.101135       0.000000       0.261327   -9999.000000   -9999.000000   -9999.000000   -9999.000000
57381     57381     hubei          113.3383       31.6192          114       173     2012      02        07        038              0.239083       4.803253       0.000000       0.259662   -9999.000000       0.219500       0.073300   -9999.000000
57381     57381     hubei          113.3383       31.6192          114       173     2012      02        08        039              0.241217       3.683075       0.672927       0.235821   -9999.000000       0.238000       0.077100       0.066000
57381     57381     hubei          113.3383       31.6192          114       173     2012      02        09        040              0.240190       3.766235       0.000000       0.241498       0.143000   -9999.000000       0.077600   -9999.000000
57381     57381     hubei          113.3383       31.6192          114       173     2012      02        10        041              0.239737       2.014008       0.000000       0.235215   -9999.000000   -9999.000000       0.078900       0.050000
57381     57381     hubei          113.3383       31.6192          114       173     2012      02        11        042              0.239850       4.340363       0.078308       0.234890   -9999.000000   -9999.000000   -9999.000000   -9999.000000
57381     57381     hubei          113.3383       31.6192          114       173     2012      02        12        043              0.240783       5.438354       0.000000       0.249306   -9999.000000   -9999.000000   -9999.000000   -9999.000000
57381     57381     hubei          113.3383       31.6192          114       173     2012      02        13        044              0.240000       3.732666       0.000000       0.251879   -9999.000000       0.104500   -9999.000000       0.151000
57381     57381     hubei          113.3383       31.6192          114       173     2012      02        14        045              0.241125       3.181519       1.858429       0.251908       0.140000   -9999.000000       0.077500   -9999.000000
57381     57381     hubei          113.3383       31.6192          114       173     2012      02        15        046              0.242000       3.326904       0.519426       0.261895   -9999.000000   -9999.000000       0.076300       0.325000
57381     57381     hubei          113.3383       31.6192          114       173     2012      02        16        047              0.240917       3.509979       0.000000       0.264984   -9999.000000   -9999.000000       0.074600   -9999.000000
57381     57381     hubei          113.3383       31.6192          114       173     2012      02        17        048              0.240261       5.941284       0.000000       0.258839       0.115000   -9999.000000   -9999.000000   -9999.000000
57381     57381     hubei          113.3383       31.6192          114       173     2012      02        18        049              0.241652       5.258392       0.556179       0.242286       0.124000       0.208900   -9999.000000       0.244000
57381     57381     hubei          113.3383       31.6192          114       173     2012      02        19        050              0.241000       5.476440       0.000000       0.241527       0.129500   -9999.000000       0.064500   -9999.000000
57381     57381     hubei          113.3383       31.6192          114       173     2012      02        20        051              0.240435       7.433044       0.000000       0.250349       0.128000       0.066200       0.061600       0.208000
57381     57381     hubei          113.3383       31.6192          114       173     2012      02        21        052              0.240000       5.939636       0.000000       0.253942   -9999.000000   -9999.000000   -9999.000000   -9999.000000
57381     57381     hubei          113.3383       31.6192          114       173     2012      02        22        053              0.240000       9.145142       0.212520       0.253597       0.107000   -9999.000000       0.061500       0.059000
57381     57381     hubei          113.3383       31.6192          114       173     2012      02        23        054              0.240095       8.759827       0.078826       0.254076       0.118500       0.105800   -9999.000000       0.146000
57381     57381     hubei          113.3383       31.6192          114       173     2012      02        24        055              0.239238       6.124512       0.000000       0.254171       0.115500   -9999.000000       0.059900   -9999.000000
57381     57381     hubei          113.3383       31.6192          114       173     2012      02        25        056              0.239048       4.623230       0.153868       0.253905       0.112000   -9999.000000       0.059000       0.055000
57381     57381     hubei          113.3383       31.6192          114       173     2012      02        26        057              0.239000       4.570740       0.091178       0.250565   -9999.000000       0.100200       0.058500   -9999.000000
57381     57381     hubei          113.3383       31.6192          114       173     2012      02        27        058              0.239000       5.854828       0.070532       0.250033   -9999.000000   -9999.000000   -9999.000000       0.162000
57381     57381     hubei          113.3383       31.6192          114       173     2012      02        28        059              0.239625       6.256012       0.000000       0.250224       0.101000   -9999.000000   -9999.000000   -9999.000000
57381     57381     hubei          113.3383       31.6192          114       173     2012      02        29        060              0.000000   -9999.000000       0.000000   -9999.000000       0.112000   -9999.000000   -9999.000000   -9999.000000
57381     57381     hubei          113.3383       31.6192          114       173     2012      03        01        061              0.239130       8.267578       0.000000       0.247631       0.143000       0.139500       0.060200       0.077000
57381     57381     hubei          113.3383       31.6192          114       173     2012      03        02        062              0.239000       6.328369       0.433067       0.249027   -9999.000000       0.147300       0.067000   -9999.000000
57381     57381     hubei          113.3383       31.6192          114       173     2012      03        03        063              0.241000       6.156799       3.552994       0.250534   -9999.000000   -9999.000000       0.064400       0.191000
57381     57381     hubei          113.3383       31.6192          114       173     2012      03        04        064              0.241000       4.844116       0.146124       0.264558       0.172000   -9999.000000       0.072000   -9999.000000
57381     57381     hubei          113.3383       31.6192          114       173     2012      03        05        065              0.241000       3.722504       0.761311       0.265521       0.139000   -9999.000000   -9999.000000       0.120000
57381     57381     hubei          113.3383       31.6192          114       173     2012      03        06        066              0.240000       7.301788       0.000000       0.258057       0.143000   -9999.000000   -9999.000000   -9999.000000
57381     57381     hubei          113.3383       31.6192          114       173     2012      03        07        067              0.000000       8.026917       0.801609       0.254517   -9999.000000       0.287500       0.061500   -9999.000000
57381     57381     hubei          113.3383       31.6192          114       173     2012      03        08        068              0.240000       7.714142       0.049679       0.256718       0.147000   -9999.000000       0.067100       0.117000
57381     57381     hubei          113.3383       31.6192          114       173     2012      03        09        069              0.240000       6.762665       0.077520       0.255477       0.129000       0.231400       0.069200   -9999.000000
57381     57381     hubei          113.3383       31.6192          114       173     2012      03        10        070              0.240000       7.210571       0.090529       0.252494       0.133000   -9999.000000   -9999.000000       0.078000
57381     57381     hubei          113.3383       31.6192          114       173     2012      03        11        071              0.239500      10.399139       0.000000       0.248393       0.129000   -9999.000000   -9999.000000   -9999.000000
57381     57381     hubei          113.3383       31.6192          114       173     2012      03        12        072              0.239000       8.738678       0.000000       0.246312       0.136000       0.027300       0.071900   -9999.000000
57381     57381     hubei          113.3383       31.6192          114       173     2012      03        13        073              0.241000       9.698639       0.084124       0.244775   -9999.000000   -9999.000000       0.068600       0.226000
57381     57381     hubei          113.3383       31.6192          114       173     2012      03        14        074              0.239000      12.730011       0.721962       0.240606   -9999.000000       0.065600       0.077800   -9999.000000
57381     57381     hubei          113.3383       31.6192          114       173     2012      03        15        075              0.244000      14.184998       4.332591       0.241021       0.163500       0.111400       0.081300       0.360000
57381     57381     hubei          113.3383       31.6192          114       173     2012      03        16        076              0.241000       9.897064       0.070652       0.269093       0.146000   -9999.000000   -9999.000000   -9999.000000
57381     57381     hubei          113.3383       31.6192          114       173     2012      03        17        077              0.240800      10.422485       0.000000       0.257488       0.146000       0.145300   -9999.000000   -9999.000000
57381     57381     hubei          113.3383       31.6192          114       173     2012      03        18        078              0.240750      12.519165       0.000000       0.251954   -9999.000000   -9999.000000       0.071400       0.218000
57381     57381     hubei          113.3383       31.6192          114       173     2012      03        19        079              0.043500      15.070648       1.877119       0.245631       0.163000       0.210000       0.102600   -9999.000000
57381     57381     hubei          113.3383       31.6192          114       173     2012      03        20        080              0.013227       6.821960       0.138147       0.255870       0.154500       0.141400       0.095800       0.181000
57381     57381     hubei          113.3383       31.6192          114       173     2012      03        21        081              0.020208       7.730774      16.603619       0.254833       0.181500   -9999.000000       0.102000   -9999.000000
57381     57381     hubei          113.3383       31.6192          114       173     2012      03        22        082              0.032542       8.550812       7.499994       0.285040       0.190000       0.166600   -9999.000000       0.502000
57381     57381     hubei          113.3383       31.6192          114       173     2012      03        23        083              0.022167       7.310883       0.247306       0.306636   -9999.000000   -9999.000000   -9999.000000       0.333000
57381     57381     hubei          113.3383       31.6192          114       173     2012      03        24        084              0.021417      11.082764       0.331230       0.283103   -9999.000000       0.180500   -9999.000000   -9999.000000
57381     57381     hubei          113.3383       31.6192          114       173     2012      03        25        085              0.000000      14.180298       0.000000       0.270843       0.143000   -9999.000000       0.091800       0.294000
57381     57381     hubei          113.3383       31.6192          114       173     2012      03        26        086              0.019917      16.399323       0.000000       0.262809       0.143000   -9999.000000       0.092200   -9999.000000
57381     57381     hubei          113.3383       31.6192          114       173     2012      03        27        087              0.018167      17.716248       0.000000       0.255485       0.132000       0.278900   -9999.000000       0.285000
57381     57381     hubei          113.3383       31.6192          114       173     2012      03        28        088              0.017208      18.750702       0.126815       0.249937   -9999.000000   -9999.000000   -9999.000000   -9999.000000
57381     57381     hubei          113.3383       31.6192          114       173     2012      03        29        089              0.017333      19.751923       0.338896       0.246650       0.140000       0.235400       0.088400   -9999.000000
57381     57381     hubei          113.3383       31.6192          114       173     2012      03        30        090              0.017208      17.311310       0.440903       0.250250       0.134500       0.066700       0.087800       0.111000
57381     57381     hubei          113.3383       31.6192          114       173     2012      03        31        091              0.016083      14.790161       0.000000       0.252645       0.130000   -9999.000000       0.089800   -9999.000000
57381     57381     hubei          113.3383       31.6192          114       173     2012      04        01        092              0.015083      18.089508       0.000000       0.240902       0.162500       0.032200       0.087000       0.297000
57381     57381     hubei          113.3383       31.6192          114       173     2012      04        02        093              0.014583      20.848297       0.000000       0.231544       0.163000       0.221500   -9999.000000   -9999.000000
57381     57381     hubei          113.3383       31.6192          114       173     2012      04        03        094              0.014292      18.472687       0.000000       0.228026   -9999.000000   -9999.000000   -9999.000000       0.352000
57381     57381     hubei          113.3383       31.6192          114       173     2012      04        04        095              0.014292      17.954681       0.500855       0.224747       0.168000       0.046200       0.073400   -9999.000000
57381     57381     hubei          113.3383       31.6192          114       173     2012      04        05        096              0.014333      15.943787       0.000000       0.225481       0.155000   -9999.000000       0.078000   -9999.000000
57381     57381     hubei          113.3383       31.6192          114       173     2012      04        06        097              0.014083      18.087433       0.000000       0.223188       0.148500       0.156100       0.073000       0.259000
57381     57381     hubei          113.3383       31.6192          114       173     2012      04        07        098              0.013375      20.391541       0.000000       0.216741       0.140000       0.032400       0.072800   -9999.000000
57381     57381     hubei          113.3383       31.6192          114       173     2012      04        08        099              0.013375      21.732269       0.319483       0.209648   -9999.000000   -9999.000000   -9999.000000       0.269000
57381     57381     hubei          113.3383       31.6192          114       173     2012      04        09        100              0.016667      21.300354       2.683831       0.207991       0.165000       0.129800   -9999.000000   -9999.000000
57381     57381     hubei          113.3383       31.6192          114       173     2012      04        10        101              0.015625      18.210938       0.119122       0.238032       0.164500   -9999.000000       0.099400   -9999.000000
57381     57381     hubei          113.3383       31.6192          114       173     2012      04        11        102              0.014875      19.305786       0.055091       0.229803       0.186500       0.136700       0.098600       0.402000
57381     57381     hubei          113.3383       31.6192          114       173     2012      04        12        103              0.018292      21.527557       8.857156       0.224115   -9999.000000   -9999.000000       0.116200   -9999.000000
57381     57381     hubei          113.3383       31.6192          114       173     2012      04        13        104              0.143542      14.280975       0.000000       0.270002   -9999.000000   -9999.000000   -9999.000000       0.166000
57381     57381     hubei          113.3383       31.6192          114       173     2012      04        14        105              0.208217      18.269714       0.199312       0.248317       0.203000       0.160000   -9999.000000   -9999.000000
57381     57381     hubei          113.3383       31.6192          114       173     2012      04        15        106              0.206500      14.676025       0.000000       0.244587       0.179500   -9999.000000       0.096700   -9999.000000
57381     57381     hubei          113.3383       31.6192          114       173     2012      04        16        107              0.205917      16.032257       0.000000       0.239658       0.177500       0.150200       0.108400       0.359000
57381     57381     hubei          113.3383       31.6192          114       173     2012      04        17        108              0.205208      20.531097       0.280346       0.231989       0.173000       0.131200       0.108200   -9999.000000
57381     57381     hubei          113.3383       31.6192          114       173     2012      04        18        109              0.205000      19.166138       0.000000       0.229923       0.158000   -9999.000000   -9999.000000       0.193000
57381     57381     hubei          113.3383       31.6192          114       173     2012      04        19        110              0.204333      20.773346       0.000000       0.224256   -9999.000000   -9999.000000   -9999.000000   -9999.000000
57381     57381     hubei          113.3383       31.6192          114       173     2012      04        20        111              0.203792      23.548462       0.183114       0.214942       0.209000       0.144300   -9999.000000       0.428000
57381     57381     hubei          113.3383       31.6192          114       173     2012      04        21        112              0.203625      19.337128       0.000000       0.218187       0.203500   -9999.000000       0.096000       0.405000
57381     57381     hubei          113.3383       31.6192          114       173     2012      04        22        113              0.202583      22.866852       3.497266       0.209747       0.200500       0.196900       0.103700   -9999.000000
57381     57381     hubei          113.3383       31.6192          114       173     2012      04        23        114              0.207042      25.479706       1.893750       0.216055       0.190000   -9999.000000       0.125100       0.491000
57381     57381     hubei          113.3383       31.6192          114       173     2012      04        24        115              0.215333      24.892242       4.338281       0.224759   -9999.000000       0.372700       0.143000   -9999.000000
57381     57381     hubei          113.3383       31.6192          114       173     2012      04        25        116              0.000000      20.410400       0.124135       0.250694       0.241000       0.150200   -9999.000000       0.393000
57381     57381     hubei          113.3383       31.6192          114       173     2012      04        26        117              0.205167      19.671112       0.000000       0.231655       0.207500   -9999.000000       0.129300   -9999.000000
57381     57381     hubei          113.3383       31.6192          114       173     2012      04        27        118              0.204917      22.584747       0.000000       0.214457       0.200500       0.171500   -9999.000000   -9999.000000
57381     57381     hubei          113.3383       31.6192          114       173     2012      04        28        119              0.206167      25.232361       3.250879       0.201154       0.194000   -9999.000000       0.128100       0.734000
57381     57381     hubei          113.3383       31.6192          114       173     2012      04        29        120              0.204095      24.803070       0.256738       0.218774   -9999.000000       0.197700       0.119300   -9999.000000
57381     57381     hubei          113.3383       31.6192          114       173     2012      04        30        121              0.221250      24.348877      12.204882       0.214666       0.286000       0.284500   -9999.000000       0.871000
57381     57381     hubei          113.3383       31.6192          114       173     2012      05        01        122              0.213500      21.214600       0.000000       0.273373       0.254500   -9999.000000   -9999.000000   -9999.000000
57381     57381     hubei          113.3383       31.6192          114       173     2012      05        02        123              0.211250      21.568634       0.858216       0.252899       0.224500       0.173700       0.123500       0.357000
57381     57381     hubei          113.3383       31.6192          114       173     2012      05        03        124              0.210500      23.398193       0.355767       0.242698       0.223000   -9999.000000       0.125000   -9999.000000
57381     57381     hubei          113.3383       31.6192          114       173     2012      05        04        125              0.208958      22.962830       0.049935       0.241880   -9999.000000   -9999.000000       0.122800   -9999.000000
57381     57381     hubei          113.3383       31.6192          114       173     2012      05        05        126              0.208125      24.436829       0.000000       0.231368       0.230000   -9999.000000       0.115700       0.412000
57381     57381     hubei          113.3383       31.6192          114       173     2012      05        06        127              0.206750      26.870300       0.000000       0.218157       0.192000   -9999.000000   -9999.000000   -9999.000000
57381     57381     hubei          113.3383       31.6192          114       173     2012      05        07        128              0.222500      28.469330      17.642895       0.205194   -9999.000000       0.149800   -9999.000000       0.852000
57381     57381     hubei          113.3383       31.6192          114       173     2012      05        08        129              0.213000      24.561401       0.000000       0.285610       0.232500   -9999.000000       0.131200   -9999.000000
57381     57381     hubei          113.3383       31.6192          114       173     2012      05        09        130              0.211667      26.972839       1.139868       0.258672       0.227000       0.106900       0.140600   -9999.000000
57381     57381     hubei          113.3383       31.6192          114       173     2012      05        10        131              0.209333      24.745148       1.021362       0.253852   -9999.000000       0.305700       0.133100       0.492000
57381     57381     hubei          113.3383       31.6192          114       173     2012      05        11        132              0.212167      27.038116       3.352841       0.236808   -9999.000000   -9999.000000       0.131000   -9999.000000
57381     57381     hubei          113.3383       31.6192          114       173     2012      05        12        133              0.243458      28.482971      16.670698       0.233551       0.316500       0.268700   -9999.000000       0.875000
57381     57381     hubei          113.3383       31.6192          114       173     2012      05        13        134              0.238917      20.442261      14.639565       0.301087       0.255000   -9999.000000       0.153400   -9999.000000
57381     57381     hubei          113.3383       31.6192          114       173     2012      05        14        135              0.234083      22.443604       0.429962       0.300461       0.275000   -9999.000000       0.157900   -9999.000000
57381     57381     hubei          113.3383       31.6192          114       173     2012      05        15        136              0.228500      20.719727       0.164446       0.288538   -9999.000000       0.173200       0.158900       0.537000
57381     57381     hubei          113.3383       31.6192          114       173     2012      05        16        137              0.223292      23.490784       0.000000       0.271694       0.264000   -9999.000000       0.148000   -9999.000000
57381     57381     hubei          113.3383       31.6192          114       173     2012      05        17        138              0.219458      25.941467       0.000000       0.257192       0.234500       0.135700   -9999.000000       0.333000
57381     57381     hubei          113.3383       31.6192          114       173     2012      05        18        139              0.220042      27.246124       1.594021       0.244638       0.299000       0.261800   -9999.000000   -9999.000000
57381     57381     hubei          113.3383       31.6192          114       173     2012      05        19        140              0.218292      24.176483       0.000000       0.251968       0.226000   -9999.000000       0.150200       0.552000
57381     57381     hubei          113.3383       31.6192          114       173     2012      05        20        141              0.215667      25.014221       0.000000       0.242475   -9999.000000       0.184200       0.158400       0.409000
57381     57381     hubei          113.3383       31.6192          114       173     2012      05        21        142              0.214625      26.040985       0.000000       0.228387       0.276000   -9999.000000       0.115300   -9999.000000
57381     57381     hubei          113.3383       31.6192          114       173     2012      05        22        143              0.225125      25.667786       4.773728       0.222774       0.296500   -9999.000000       0.110700       0.766000
57381     57381     hubei          113.3383       31.6192          114       173     2012      05        23        144              0.224042      23.873627       0.668527       0.245506   -9999.000000       0.163800   -9999.000000   -9999.000000
57381     57381     hubei          113.3383       31.6192          114       173     2012      05        24        145              0.234333      23.408264       6.117110       0.247870   -9999.000000   -9999.000000   -9999.000000       0.839000
57381     57381     hubei          113.3383       31.6192          114       173     2012      05        25        146              0.000000      21.431458       1.276436       0.269606   -9999.000000       0.172100       0.118800   -9999.000000
57381     57381     hubei          113.3383       31.6192          114       173     2012      05        26        147              0.224375      20.634003       0.000000       0.263232       0.290000       0.087500       0.129300   -9999.000000
57381     57381     hubei          113.3383       31.6192          114       173     2012      05        27        148              0.221958      25.563721       0.000000       0.246022       0.272000   -9999.000000       0.121500       0.300000
57381     57381     hubei          113.3383       31.6192          114       173     2012      05        28        149              0.221000      26.927826       2.270801       0.233735       0.286500       0.128100       0.122900   -9999.000000
57381     57381     hubei          113.3383       31.6192          114       173     2012      05        29        150              0.285958      28.291443      34.604763       0.229471       0.387000   -9999.000000   -9999.000000       0.832000
57381     57381     hubei          113.3383       31.6192          114       173     2012      05        30        151              0.247250      21.351288       0.000000       0.324637       0.342000       0.334900       0.144000   -9999.000000
57381     57381     hubei          113.3383       31.6192          114       173     2012      05        31        152              0.238458      24.938110       0.000000       0.286547   -9999.000000   -9999.000000   -9999.000000   -9999.000000
57381     57381     hubei          113.3383       31.6192          114       173     2012      06        01        153              0.242542      25.110779       1.040759       0.272397       0.324000       0.140200       0.151100   -9999.000000
57381     57381     hubei          113.3383       31.6192          114       173     2012      06        02        154              0.237292      22.497498       0.000000       0.273668       0.297000       0.215200       0.147800   -9999.000000
57381     57381     hubei          113.3383       31.6192          114       173     2012      06        03        155              0.234292      25.285828       0.000000       0.262655       0.317500   -9999.000000   -9999.000000       0.470000
57381     57381     hubei          113.3383       31.6192          114       173     2012      06        04        156              0.231458      25.672455       0.000000       0.255689       0.291000       0.352300   -9999.000000   -9999.000000
57381     57381     hubei          113.3383       31.6192          114       173     2012      06        05        157              0.239917      27.168732       8.915386       0.246840   -9999.000000       0.170700       0.197400       0.757000
57381     57381     hubei          113.3383       31.6192          114       173     2012      06        06        158              0.241333      26.665100       0.241983       0.270918       0.307000   -9999.000000       0.197100   -9999.000000
57381     57381     hubei          113.3383       31.6192          114       173     2012      06        07        159              0.237167      25.997345       0.000000       0.270812       0.314500       0.223000       0.193300   -9999.000000
57381     57381     hubei          113.3383       31.6192          114       173     2012      06        08        160              0.231833      28.635956       0.000000       0.255465       0.269500   -9999.000000       0.174900       0.553000
57381     57381     hubei          113.3383       31.6192          114       173     2012      06        09        161              0.228167      31.042023       0.000000       0.242434       0.267000   -9999.000000   -9999.000000   -9999.000000
57381     57381     hubei          113.3383       31.6192          114       173     2012      06        10        162              0.224583      31.976318       0.366351       0.230488   -9999.000000       0.175000   -9999.000000       0.465000
57381     57381     hubei          113.3383       31.6192          114       173     2012      06        11        163              0.000000      30.075348       0.610278       0.222072       0.298000   -9999.000000       0.198700   -9999.000000
57381     57381     hubei          113.3383       31.6192          114       173     2012      06        12        164              0.221292      27.682526       0.000000       0.220077       0.284500       0.169500       0.217500   -9999.000000
57381     57381     hubei          113.3383       31.6192          114       173     2012      06        13        165              0.219000      31.114899       0.000000       0.204320       0.302000   -9999.000000       0.198900       0.500000
57381     57381     hubei          113.3383       31.6192          114       173     2012      06        14        166              0.217042      31.733582       0.072398       0.189704       0.295000   -9999.000000   -9999.000000   -9999.000000
57381     57381     hubei          113.3383       31.6192          114       173     2012      06        15        167              0.215042      29.104675       0.000000       0.187646   -9999.000000   -9999.000000   -9999.000000       0.338000
57381     57381     hubei          113.3383       31.6192          114       173     2012      06        16        168              0.213625      30.480896       0.000000       0.175820       0.283000   -9999.000000       0.208700   -9999.000000
57381     57381     hubei          113.3383       31.6192          114       173     2012      06        17        169              0.212458      30.434937       0.062033       0.166558       0.267000   -9999.000000       0.195300       0.558000
57381     57381     hubei          113.3383       31.6192          114       173     2012      06        18        170              0.211958      29.389984       0.105207       0.161830       0.258500       0.316900       0.166500       0.511000
57381     57381     hubei          113.3383       31.6192          114       173     2012      06        19        171              0.210542      31.485168       0.000000       0.156321       0.255500       0.360300       0.150800   -9999.000000
57381     57381     hubei          113.3383       31.6192          114       173     2012      06        20        172              0.210208      32.551605       0.000000       0.149925       0.227000       0.155100   -9999.000000       0.383000
57381     57381     hubei          113.3383       31.6192          114       173     2012      06        21        173              0.209125      33.170135       0.903359       0.144934   -9999.000000   -9999.000000   -9999.000000   -9999.000000
57381     57381     hubei          113.3383       31.6192          114       173     2012      06        22        174              0.208292      32.972809       0.033184       0.152209       0.248000   -9999.000000       0.144200       0.421000
57381     57381     hubei          113.3383       31.6192          114       173     2012      06        23        175              0.207708      33.848816       0.090355       0.145863       0.229500       0.124000       0.153200   -9999.000000
57381     57381     hubei          113.3383       31.6192          114       173     2012      06        24        176              0.207167      34.464600       0.000000       0.141955       0.216000   -9999.000000       0.138100   -9999.000000
57381     57381     hubei          113.3383       31.6192          114       173     2012      06        25        177              0.206292      35.089111       0.219603       0.138140       0.218000       0.144100       0.094900       0.349000
57381     57381     hubei          113.3383       31.6192          114       173     2012      06        26        178              0.231208      32.608643      10.211908       0.138470   -9999.000000   -9999.000000   -9999.000000   -9999.000000
57381     57381     hubei          113.3383       31.6192          114       173     2012      06        27        179              0.275583      29.727081      30.322853       0.200170   -9999.000000   -9999.000000   -9999.000000       1.000000
57381     57381     hubei          113.3383       31.6192          114       173     2012      06        28        180              0.286750      26.398254      18.236492       0.303634       0.277000       0.316200       0.110100   -9999.000000
57381     57381     hubei          113.3383       31.6192          114       173     2012      06        29        181              0.264583      26.423767       0.557000       0.320184       0.267500   -9999.000000       0.111400       0.995000
57381     57381     hubei          113.3383       31.6192          114       173     2012      06        30        182              0.256708      29.168335       8.930737       0.289217       0.291000       0.069300       0.109400   -9999.000000
57381     57381     hubei          113.3383       31.6192          114       173     2012      07        01        183              0.250136      26.398346       0.000000       0.300224   -9999.000000   -9999.000000   -9999.000000   -9999.000000
57381     57381     hubei          113.3383       31.6192          114       173     2012      07        02        184              0.240750      27.651917       0.545058       0.281599       0.316000       0.256800   -9999.000000       0.677000
57381     57381     hubei          113.3383       31.6192          114       173     2012      07        03        185              0.234417      31.166779       0.000000       0.267437       0.288000       0.448500       0.144300   -9999.000000
57381     57381     hubei          113.3383       31.6192          114       173     2012      07        04        186              0.229708      32.179657       0.694683       0.256312       0.319000   -9999.000000       0.133100       0.578000
57381     57381     hubei          113.3383       31.6192          114       173     2012      07        05        187              0.248458      31.984253      10.626073       0.247687   -9999.000000       0.342900       0.159500   -9999.000000
57381     57381     hubei          113.3383       31.6192          114       173     2012      07        06        188              0.245292      28.460480       0.000000       0.281477   -9999.000000       0.152000       0.147000   -9999.000000
57381     57381     hubei          113.3383       31.6192          114       173     2012      07        07        189              0.233059      31.041931       0.040641       0.271657   -9999.000000       0.124100   -9999.000000       0.629000
57381     57381     hubei          113.3383       31.6192          114       173     2012      07        08        190              0.227333      32.999725       0.000000       0.252854       0.289000       0.126300   -9999.000000   -9999.000000
57381     57381     hubei          113.3383       31.6192          114       173     2012      07        09        191              0.223500      33.651062       0.121731       0.237768       0.278000   -9999.000000       0.143600       0.430000
57381     57381     hubei          113.3383       31.6192          114       173     2012      07        10        192              0.225250      33.702911       1.204644       0.225237       0.280500   -9999.000000       0.161100   -9999.000000
57381     57381     hubei          113.3383       31.6192          114       173     2012      07        11        193              0.223500      31.831573       0.101227       0.228850       0.280000   -9999.000000       0.155100   -9999.000000
57381     57381     hubei          113.3383       31.6192          114       173     2012      07        12        194              0.228167      33.569763       1.108836       0.220267   -9999.000000   -9999.000000       0.142600       0.506000
57381     57381     hubei          113.3383       31.6192          114       173     2012      07        13        195              0.241826      30.532471      12.344528       0.226834       0.348000       0.218500   -9999.000000   -9999.000000
57381     57381     hubei          113.3383       31.6192          114       173     2012      07        14        196              0.228833      28.343384       0.264556       0.273968       0.335500   -9999.000000       0.161500       0.649000
57381     57381     hubei          113.3383       31.6192          114       173     2012      07        15        197              0.225125      30.036957       0.389609       0.256724       0.303000   -9999.000000       0.152800   -9999.000000
57381     57381     hubei          113.3383       31.6192          114       173     2012      07        16        198              0.221667      29.624084       0.000000       0.243305       0.273000       0.374600       0.175500       0.592000
57381     57381     hubei          113.3383       31.6192          114       173     2012      07        17        199              0.219000      30.240753       0.240974       0.230749   -9999.000000   -9999.000000       0.165800       0.573000
57381     57381     hubei          113.3383       31.6192          114       173     2012      07        18        200              0.217417      30.423676       0.000000       0.220962       0.306000       0.036800   -9999.000000   -9999.000000
57381     57381     hubei          113.3383       31.6192          114       173     2012      07        19        201              0.215708      31.014740       0.000000       0.208440       0.270000   -9999.000000   -9999.000000       0.422000
57381     57381     hubei          113.3383       31.6192          114       173     2012      07        20        202              0.215667      31.842896       0.799628       0.196863       0.315000       0.167200       0.166000   -9999.000000
57381     57381     hubei          113.3383       31.6192          114       173     2012      07        21        203              0.213870      32.022858       0.121849       0.197073       0.325000       0.186600       0.167900       0.581000
57381     57381     hubei          113.3383       31.6192          114       173     2012      07        22        204              0.212208      34.471893       0.000000       0.184866       0.312000   -9999.000000       0.164400   -9999.000000
57381     57381     hubei          113.3383       31.6192          114       173     2012      07        23        205              0.212792      32.603333       1.156468       0.174402   -9999.000000       0.083100       0.130000   -9999.000000
57381     57381     hubei          113.3383       31.6192          114       173     2012      07        24        206              0.210875      33.685364       0.939927       0.173074       0.347000       0.251700   -9999.000000       0.524000
57381     57381     hubei          113.3383       31.6192          114       173     2012      07        25        207              0.209500      33.812134       1.417539       0.175290       0.311500       0.230800   -9999.000000   -9999.000000
57381     57381     hubei          113.3383       31.6192          114       173     2012      07        26        208              0.208458      35.105347       1.101501       0.162175       0.274500       0.159100       0.140500       0.435000
57381     57381     hubei          113.3383       31.6192          114       173     2012      07        27        209              0.207417      34.361084       0.931786       0.162487       0.254000   -9999.000000       0.151400   -9999.000000
57381     57381     hubei          113.3383       31.6192          114       173     2012      07        28        210              0.207083      33.773010       1.079131       0.163049   -9999.000000       0.233200       0.148100       0.601000
57381     57381     hubei          113.3383       31.6192          114       173     2012      07        29        211              0.206250      34.478638       0.000000       0.163326       0.322000   -9999.000000       0.141600   -9999.000000
57381     57381     hubei          113.3383       31.6192          114       173     2012      07        30        212              0.205875      35.476898       0.196855       0.148967       0.288500   -9999.000000   -9999.000000   -9999.000000
57381     57381     hubei          113.3383       31.6192          114       173     2012      07        31        213              0.209625      36.458496       7.950718       0.141542       0.330000       0.210700       0.175000       0.458000
57381     57381     hubei          113.3383       31.6192          114       173     2012      08        01        214              0.220833      35.350006       0.698685       0.175115       0.311500   -9999.000000       0.165200   -9999.000000
57381     57381     hubei          113.3383       31.6192          114       173     2012      08        02        215              0.214125      32.918457       0.041328       0.205524       0.294000       0.201500       0.170400       0.349000
57381     57381     hubei          113.3383       31.6192          114       173     2012      08        03        216              0.210833      32.058380       0.000000       0.176620   -9999.000000       0.359700       0.164000   -9999.000000
57381     57381     hubei          113.3383       31.6192          114       173     2012      08        04        217              0.209708      32.977478       0.324825       0.157844       0.328000   -9999.000000   -9999.000000   -9999.000000
57381     57381     hubei          113.3383       31.6192          114       173     2012      08        05        218              0.216583      30.054840       3.622301       0.155398       0.320000       0.178100   -9999.000000       0.627000
57381     57381     hubei          113.3383       31.6192          114       173     2012      08        06        219              0.210500      31.466827       0.042385       0.183847       0.328000   -9999.000000       0.130600   -9999.000000
57381     57381     hubei          113.3383       31.6192          114       173     2012      08        07        220              0.208083      32.580200       0.000000       0.170745       0.298000   -9999.000000       0.122600       0.385000
57381     57381     hubei          113.3383       31.6192          114       173     2012      08        08        221              0.206750      33.183716       0.000000       0.149977   -9999.000000       0.020700       0.130900   -9999.000000
57381     57381     hubei          113.3383       31.6192          114       173     2012      08        09        222              0.205833      33.691711       0.000000       0.138227       0.328000   -9999.000000       0.129700   -9999.000000
57381     57381     hubei          113.3383       31.6192          114       173     2012      08        10        223              0.207500      33.476593       0.418142       0.131564       0.315000       0.091300   -9999.000000       0.490000
57381     57381     hubei          113.3383       31.6192          114       173     2012      08        11        224              0.206458      31.058350       0.124350       0.132316       0.286000       0.208100   -9999.000000   -9999.000000
57381     57381     hubei          113.3383       31.6192          114       173     2012      08        12        225              0.205750      31.135773       0.000000       0.131762       0.248000   -9999.000000       0.123500       0.335000
57381     57381     hubei          113.3383       31.6192          114       173     2012      08        13        226              0.207125      35.270447       0.501838       0.124713   -9999.000000       0.180000       0.153800   -9999.000000
57381     57381     hubei          113.3383       31.6192          114       173     2012      08        14        227              0.213625      31.917908       0.193058       0.123964       0.298000   -9999.000000       0.145100       0.413000
57381     57381     hubei          113.3383       31.6192          114       173     2012      08        15        228              0.208750      31.081085       0.066726       0.126096       0.297000       0.196400       0.138800       0.453000
57381     57381     hubei          113.3383       31.6192          114       173     2012      08        16        229              0.206042      31.830750       0.000000       0.122669       0.277500       0.053500   -9999.000000   -9999.000000
57381     57381     hubei          113.3383       31.6192          114       173     2012      08        17        230              0.206542      33.848633       0.000000       0.117589       0.275000   -9999.000000       0.149300       0.220000
57381     57381     hubei          113.3383       31.6192          114       173     2012      08        18        231              0.233167      36.378906       3.121176       0.116427   -9999.000000       0.225000       0.139200   -9999.000000
57381     57381     hubei          113.3383       31.6192          114       173     2012      08        19        232              0.224417      33.930237       3.945851       0.148971   -9999.000000   -9999.000000       0.150200       0.563000
57381     57381     hubei          113.3383       31.6192          114       173     2012      08        20        233              0.235667      32.534363      63.429966       0.173741   -9999.000000       0.163700       0.127800   -9999.000000
57381     57381     hubei          113.3383       31.6192          114       173     2012      08        21        234              0.251958      30.729187      15.272901       0.276578       0.311500       0.221700   -9999.000000   -9999.000000
57381     57381     hubei          113.3383       31.6192          114       173     2012      08        22        235              0.235792      25.370148       1.191094       0.331613       0.289500   -9999.000000   -9999.000000   -9999.000000
57381     57381     hubei          113.3383       31.6192          114       173     2012      08        23        236              0.228667      23.893494       0.000000       0.287008       0.263000       0.304300       0.132800   -9999.000000
57381     57381     hubei          113.3383       31.6192          114       173     2012      08        24        237              0.223375      24.978729       0.000000       0.270810   -9999.000000   -9999.000000       0.143000       0.533000
57381     57381     hubei          113.3383       31.6192          114       173     2012      08        25        238              0.000000      26.673004       0.000000       0.259131       0.274000       0.138600       0.124700   -9999.000000
57381     57381     hubei          113.3383       31.6192          114       173     2012      08        26        239              0.233958      28.274902       6.299172       0.249650       0.326000       0.065200       0.137900       0.668000
57381     57381     hubei          113.3383       31.6192          114       173     2012      08        27        240              0.229250      26.226105       0.000000       0.273676       0.281000   -9999.000000   -9999.000000   -9999.000000
57381     57381     hubei          113.3383       31.6192          114       173     2012      08        28        241              0.222417      26.668427       2.441693       0.262598       0.269500       0.128400   -9999.000000   -9999.000000
57381     57381     hubei          113.3383       31.6192          114       173     2012      08        29        242              0.219167      28.712677       0.000000       0.249741       0.239000       0.276500       0.122100       0.470000
57381     57381     hubei          113.3383       31.6192          114       173     2012      08        30        243              0.217458      30.427948       0.000000       0.238760   -9999.000000   -9999.000000       0.133200   -9999.000000
57381     57381     hubei          113.3383       31.6192          114       173     2012      08        31        244              0.216208      30.284851       0.218911       0.231570       0.266000       0.131300       0.122400       0.463000
57381     57381     hubei          113.3383       31.6192          114       173     2012      09        01        245              0.214583      29.624054       2.443851       0.230030       0.245500   -9999.000000   -9999.000000   -9999.000000
57381     57381     hubei          113.3383       31.6192          114       173     2012      09        02        246              0.212875      31.267120       1.780692       0.224723       0.262500       0.225400   -9999.000000   -9999.000000
57381     57381     hubei          113.3383       31.6192          114       173     2012      09        03        247              0.211542      25.623047       0.000000       0.239119       0.243000       0.198600       0.127100       0.345000
57381     57381     hubei          113.3383       31.6192          114       173     2012      09        04        248              0.210250      27.169434       2.012899       0.223490   -9999.000000   -9999.000000       0.131000   -9999.000000
57381     57381     hubei          113.3383       31.6192          114       173     2012      09        05        249              0.209042      28.130066       0.000000       0.209760       0.255000       0.123600       0.131400       0.268000
57381     57381     hubei          113.3383       31.6192          114       173     2012      09        06        250              0.209333      28.435455       1.437589       0.197305       0.274000   -9999.000000       0.115900   -9999.000000
57381     57381     hubei          113.3383       31.6192          114       173     2012      09        07        251              0.215417      27.621643       4.621368       0.199102       0.260000       0.199300   -9999.000000   -9999.000000
57381     57381     hubei          113.3383       31.6192          114       173     2012      09        08        252              0.255583      29.015198      39.209408       0.218563   -9999.000000       0.272800   -9999.000000       0.837000
57381     57381     hubei          113.3383       31.6192          114       173     2012      09        09        253              0.233583      23.859741       0.000000       0.331321   -9999.000000   -9999.000000       0.135400   -9999.000000
57381     57381     hubei          113.3383       31.6192          114       173     2012      09        10        254              0.229750      25.044373       0.000000       0.287466   -9999.000000       0.271000       0.146600       0.497000
57381     57381     hubei          113.3383       31.6192          114       173     2012      09        11        255              0.235958      26.044708       7.853106       0.274912   -9999.000000   -9999.000000       0.153900   -9999.000000
57381     57381     hubei          113.3383       31.6192          114       173     2012      09        12        256              0.244708      24.738007       3.657179       0.286661       0.219000   -9999.000000       0.137300       0.863000
57381     57381     hubei          113.3383       31.6192          114       173     2012      09        13        257              0.233696      22.499023       0.000000       0.293259       0.209500       0.128100   -9999.000000       0.500000
57381     57381     hubei          113.3383       31.6192          114       173     2012      09        14        258              0.230250      21.554352       0.000000       0.275787       0.199000   -9999.000000   -9999.000000   -9999.000000
57381     57381     hubei          113.3383       31.6192          114       173     2012      09        15        259              0.226042      22.754089       0.000000       0.263386   -9999.000000       0.130500       0.133200       0.240000
57381     57381     hubei          113.3383       31.6192          114       173     2012      09        16        260              0.219667      23.021698       0.000000       0.254319       0.210000       0.108000       0.139100   -9999.000000
57381     57381     hubei          113.3383       31.6192          114       173     2012      09        17        261              0.217792      23.299438       0.043901       0.248887       0.215000   -9999.000000       0.105800       0.340000
57381     57381     hubei          113.3383       31.6192          114       173     2012      09        18        262              0.216958      23.185913       0.000000       0.244318       0.205000       0.215600   -9999.000000   -9999.000000
57381     57381     hubei          113.3383       31.6192          114       173     2012      09        19        263              0.215667      24.338959       4.121490       0.238359       0.216000   -9999.000000   -9999.000000   -9999.000000
57381     57381     hubei          113.3383       31.6192          114       173     2012      09        20        264              0.214708      25.396820       0.056198       0.232019   -9999.000000       0.186800       0.107200       0.316000
57381     57381     hubei          113.3383       31.6192          114       173     2012      09        21        265              0.215375      26.587799       0.692286       0.225901   -9999.000000       0.108700       0.110900   -9999.000000
57381     57381     hubei          113.3383       31.6192          114       173     2012      09        22        266              0.214167      23.369263       0.000000       0.231751       0.195000   -9999.000000       0.111800       0.398000
57381     57381     hubei          113.3383       31.6192          114       173     2012      09        23        267              0.213833      25.731964       0.000000       0.224706       0.203500       0.090600       0.112700   -9999.000000
57381     57381     hubei          113.3383       31.6192          114       173     2012      09        24        268              0.213125      24.591187       0.000000       0.222287       0.193000   -9999.000000   -9999.000000       0.425000
57381     57381     hubei          113.3383       31.6192          114       173     2012      09        25        269              0.212417      25.584015       0.292744       0.214661       0.201000       0.272000   -9999.000000   -9999.000000
57381     57381     hubei          113.3383       31.6192          114       173     2012      09        26        270              0.212042      26.324615       0.000000       0.210344   -9999.000000       0.027000       0.126600   -9999.000000
57381     57381     hubei          113.3383       31.6192          114       173     2012      09        27        271              0.212000      25.088104       0.000000       0.207778       0.181000   -9999.000000       0.137400       0.300000
57381     57381     hubei          113.3383       31.6192          114       173     2012      09        28        272              0.208000      25.346252       0.000000       0.201521       0.193500   -9999.000000       0.136900   -9999.000000
57381     57381     hubei          113.3383       31.6192          114       173     2012      09        29        273              0.211125      21.928772       0.000000       0.191029       0.185500   -9999.000000       0.136700       0.296000
57381     57381     hubei          113.3383       31.6192          114       173     2012      09        30        274              0.208667      21.872711       0.092019       0.186125       0.190000   -9999.000000   -9999.000000   -9999.000000
57381     57381     hubei          113.3383       31.6192          114       173     2012      10        01        275              0.211000      21.174133       0.000000       0.183856   -9999.000000       0.294900       0.092500   -9999.000000
57381     57381     hubei          113.3383       31.6192          114       173     2012      10        02        276              0.211292      22.572266       0.095003       0.178633       0.188000   -9999.000000       0.087500       0.399000
57381     57381     hubei          113.3383       31.6192          114       173     2012      10        03        277              0.207167      23.906616       0.000000       0.174699       0.193000       0.052300       0.089500   -9999.000000
57381     57381     hubei          113.3383       31.6192          114       173     2012      10        04        278              0.207583      21.671631       0.376068       0.175714       0.186500   -9999.000000       0.087800       0.284000
57381     57381     hubei          113.3383       31.6192          114       173     2012      10        05        279              0.208958      22.577881       0.403826       0.177074   -9999.000000       0.086600   -9999.000000   -9999.000000
57381     57381     hubei          113.3383       31.6192          114       173     2012      10        06        280              0.208167      20.564087       0.050789       0.188044       0.184000       0.196800   -9999.000000   -9999.000000
57381     57381     hubei          113.3383       31.6192          114       173     2012      10        07        281              0.208125      23.035950       0.109113       0.183721   -9999.000000   -9999.000000       0.086300       0.378000
57381     57381     hubei          113.3383       31.6192          114       173     2012      10        08        282              0.209500      22.030884       0.484449       0.184105       0.201000       0.154200       0.076300   -9999.000000
57381     57381     hubei          113.3383       31.6192          114       173     2012      10        09        283              0.207958      23.522980       0.000000       0.184515       0.191000       0.237600       0.075700       0.187000
57381     57381     hubei          113.3383       31.6192          114       173     2012      10        10        284              0.206667      22.710968       0.099827       0.179428       0.181500       0.098500       0.070500   -9999.000000
57381     57381     hubei          113.3383       31.6192          114       173     2012      10        11        285              0.206042      22.752075       0.000000       0.173174       0.142000       0.111600   -9999.000000       0.222000
57381     57381     hubei          113.3383       31.6192          114       173     2012      10        12        286              0.206625      21.203735       0.047062       0.171938   -9999.000000   -9999.000000   -9999.000000       0.313000
57381     57381     hubei          113.3383       31.6192          114       173     2012      10        13        287              0.206292      20.753693       0.000000       0.172841       0.148000       0.187800       0.065800   -9999.000000
57381     57381     hubei          113.3383       31.6192          114       173     2012      10        14        288              0.206083      21.003601       0.257150       0.172947       0.149000       0.031800       0.077800       0.121000
57381     57381     hubei          113.3383       31.6192          114       173     2012      10        15        289              0.237250      22.071625      19.475065       0.172069       0.187000   -9999.000000       0.111700   -9999.000000
57381     57381     hubei          113.3383       31.6192          114       173     2012      10        16        290              0.234458      20.086975       0.256536       0.268301       0.203000       0.139500       0.103900       0.547000
57381     57381     hubei          113.3383       31.6192          114       173     2012      10        17        291              0.229583      17.263672       0.000000       0.263024   -9999.000000   -9999.000000   -9999.000000   -9999.000000
57381     57381     hubei          113.3383       31.6192          114       173     2012      10        18        292              0.231125      17.400543       0.000000       0.245709       0.146000   -9999.000000       0.098300   -9999.000000
57381     57381     hubei          113.3383       31.6192          114       173     2012      10        19        293              0.223750      19.410156       0.030702       0.236489       0.146500       0.235500       0.098600       0.164000
57381     57381     hubei          113.3383       31.6192          114       173     2012      10        20        294              0.217542      20.866272       0.000000       0.230878       0.147500   -9999.000000       0.100100   -9999.000000
57381     57381     hubei          113.3383       31.6192          114       173     2012      10        21        295              0.240958      22.278076      15.381896       0.225838       0.221000       0.358100       0.101500       0.834000
57381     57381     hubei          113.3383       31.6192          114       173     2012      10        22        296              0.237417      21.240997       0.000000       0.268785   -9999.000000   -9999.000000   -9999.000000   -9999.000000
57381     57381     hubei          113.3383       31.6192          114       173     2012      10        23        297              0.233625      15.650909       0.066395       0.270512   -9999.000000   -9999.000000   -9999.000000       0.335000
57381     57381     hubei          113.3383       31.6192          114       173     2012      10        24        298              0.230625      17.726257       0.096055       0.256419   -9999.000000       0.128300       0.085800   -9999.000000
57381     57381     hubei          113.3383       31.6192          114       173     2012      10        25        299              0.000000      16.663513       4.099237       0.252565       0.216000   -9999.000000       0.085600   -9999.000000
57381     57381     hubei          113.3383       31.6192          114       173     2012      10        26        300              0.254667      18.392883       8.453945       0.258280       0.263000       0.099600       0.102100       0.677000
57381     57381     hubei          113.3383       31.6192          114       173     2012      10        27        301              0.239958      16.198700       0.000000       0.292231       0.229000       0.284400       0.094700   -9999.000000
57381     57381     hubei          113.3383       31.6192          114       173     2012      10        28        302              0.000000      18.140961       3.609600       0.269095   -9999.000000   -9999.000000   -9999.000000       0.388000
57381     57381     hubei          113.3383       31.6192          114       173     2012      10        29        303              0.270458      19.178131      14.552873       0.265429       0.241000       0.202500   -9999.000000   -9999.000000
57381     57381     hubei          113.3383       31.6192          114       173     2012      10        30        304              0.247292      16.325348       0.096844       0.309338       0.238000   -9999.000000       0.103900   -9999.000000
57381     57381     hubei          113.3383       31.6192          114       173     2012      10        31        305              0.246167      15.398041       0.000000       0.282819       0.224500       0.245100       0.112100       0.492000
57381     57381     hubei          113.3383       31.6192          114       173     2012      11        01        306              0.242000      14.878113       0.000000       0.272791       0.191000       0.092000       0.114600   -9999.000000
57381     57381     hubei          113.3383       31.6192          114       173     2012      11        02        307              0.244083      14.442749      11.032884       0.268083       0.197000   -9999.000000   -9999.000000       0.316000
57381     57381     hubei          113.3383       31.6192          114       173     2012      11        03        308              0.265417      16.169556      12.668956       0.273793   -9999.000000       0.258300   -9999.000000   -9999.000000
57381     57381     hubei          113.3383       31.6192          114       173     2012      11        04        309              0.248565      11.360535       0.000000       0.312413   -9999.000000   -9999.000000       0.111200   -9999.000000
57381     57381     hubei          113.3383       31.6192          114       173     2012      11        05        310              0.251458      12.324341       0.000000       0.287135       0.223000       0.186000       0.108200       0.448000
57381     57381     hubei          113.3383       31.6192          114       173     2012      11        06        311              0.262000      11.806244       0.000000       0.278630       0.201000       0.182100       0.109500   -9999.000000
57381     57381     hubei          113.3383       31.6192          114       173     2012      11        07        312              0.261042      12.219238       0.856053       0.273351       0.212000   -9999.000000       0.109100       0.277000
57381     57381     hubei          113.3383       31.6192          114       173     2012      11        08        313              0.245792      12.519745       0.071583       0.273261   -9999.000000       0.282300   -9999.000000   -9999.000000
57381     57381     hubei          113.3383       31.6192          114       173     2012      11        09        314              0.244250      11.861877       0.234707       0.272911       0.223000   -9999.000000   -9999.000000       0.499000
57381     57381     hubei          113.3383       31.6192          114       173     2012      11        10        315              0.241833      11.306335       0.000000       0.271589       0.243000       0.194500       0.101200       0.459000
57381     57381     hubei          113.3383       31.6192          114       173     2012      11        11        316              0.239542      11.201538       0.000000       0.269157       0.169000       0.151700       0.104300   -9999.000000
57381     57381     hubei          113.3383       31.6192          114       173     2012      11        12        317              0.240417      11.039398       0.000000       0.264084       0.176000   -9999.000000       0.105100       0.224000
57381     57381     hubei          113.3383       31.6192          114       173     2012      11        13        318              0.000000      11.337585       0.000000       0.262136   -9999.000000       0.140000       0.100300   -9999.000000
57381     57381     hubei          113.3383       31.6192          114       173     2012      11        14        319              0.272292      13.502594       0.000000       0.259746       0.181000       0.265100   -9999.000000       0.270000
57381     57381     hubei          113.3383       31.6192          114       173     2012      11        15        320              0.302583      13.550323       8.472821       0.257931       0.206000       0.034700       0.112300   -9999.000000
57381     57381     hubei          113.3383       31.6192          114       173     2012      11        16        321              0.243625      10.381165       0.127934       0.281203       0.205000       0.174600       0.098500   -9999.000000
57381     57381     hubei          113.3383       31.6192          114       173     2012      11        17        322              0.000000      10.047485       0.000000       0.277313       0.191500   -9999.000000       0.101400       0.298000
57381     57381     hubei          113.3383       31.6192          114       173     2012      11        18        323              0.243500      10.552673       0.000000       0.269693       0.195000       0.123900       0.104800   -9999.000000
57381     57381     hubei          113.3383       31.6192          114       173     2012      11        19        324              0.246250      12.322845       0.154248       0.265746   -9999.000000       0.104700   -9999.000000       0.315000
57381     57381     hubei          113.3383       31.6192          114       173     2012      11        20        325              0.240083      13.010773       1.854829       0.263711       0.195000   -9999.000000   -9999.000000   -9999.000000
57381     57381     hubei          113.3383       31.6192          114       173     2012      11        21        326              0.239833      12.188202       0.000000       0.268816       0.179500   -9999.000000       0.077100       0.392000
57381     57381     hubei          113.3383       31.6192          114       173     2012      11        22        327              0.237875      11.288666       0.000000       0.267245       0.189500   -9999.000000       0.082400   -9999.000000
57381     57381     hubei          113.3383       31.6192          114       173     2012      11        23        328              0.235208      10.610870       0.000000       0.264595       0.185000       0.162700       0.078800   -9999.000000
57381     57381     hubei          113.3383       31.6192          114       173     2012      11        24        329              0.236917       7.921265       0.911181       0.261156   -9999.000000       0.154200       0.076000       0.282000
57381     57381     hubei          113.3383       31.6192          114       173     2012      11        25        330              0.245792       8.971466       2.628864       0.262546   -9999.000000   -9999.000000   -9999.000000   -9999.000000
57381     57381     hubei          113.3383       31.6192          114       173     2012      11        26        331              0.238333       6.823883       0.000000       0.276173       0.182000       0.149400   -9999.000000       0.163000
57381     57381     hubei          113.3383       31.6192          114       173     2012      11        27        332              0.240458       7.425903       0.000000       0.265121       0.186500   -9999.000000       0.084000   -9999.000000
57381     57381     hubei          113.3383       31.6192          114       173     2012      11        28        333              0.236542       9.050323       0.000000       0.262132       0.183000       0.182300       0.094500   -9999.000000
57381     57381     hubei          113.3383       31.6192          114       173     2012      11        29        334              0.242583       8.199738       1.157386       0.260515       0.192000       0.183500       0.095200       0.262000
57381     57381     hubei          113.3383       31.6192          114       173     2012      11        30        335              0.238250       8.809570       0.076553       0.263575   -9999.000000   -9999.000000       0.093300   -9999.000000
57381     57381     hubei          113.3383       31.6192          114       173     2012      12        01        336              0.240167       8.844208       1.596168       0.262159   -9999.000000   -9999.000000   -9999.000000       0.203000
57381     57381     hubei          113.3383       31.6192          114       173     2012      12        02        337              0.237542       5.141693       0.000000       0.268552       0.191000       0.247400       0.095900   -9999.000000
57381     57381     hubei          113.3383       31.6192          114       173     2012      12        03        338              0.236583       5.610565       0.000000       0.263803       0.172000       0.140100       0.100400   -9999.000000
57381     57381     hubei          113.3383       31.6192          114       173     2012      12        04        339              0.235750       7.163696       0.000000       0.260783       0.174000       0.152600       0.102700       0.291000
57381     57381     hubei          113.3383       31.6192          114       173     2012      12        05        340              0.240583       6.025726       0.000000       0.260060   -9999.000000   -9999.000000       0.104400   -9999.000000
57381     57381     hubei          113.3383       31.6192          114       173     2012      12        06        341              0.239208       7.304474       0.026851       0.256989   -9999.000000       0.267700   -9999.000000       0.110000
57381     57381     hubei          113.3383       31.6192          114       173     2012      12        07        342              0.241739       6.502960       0.000000       0.256425       0.176000       0.040300   -9999.000000   -9999.000000
57381     57381     hubei          113.3383       31.6192          114       173     2012      12        08        343              0.267583       7.694244       0.000000       0.254626       0.172000   -9999.000000       0.096600       0.159000
57381     57381     hubei          113.3383       31.6192          114       173     2012      12        09        344              0.282125       7.425232       1.880590       0.252782       0.170000       0.125700       0.106700       0.234000
57381     57381     hubei          113.3383       31.6192          114       173     2012      12        10        345              0.303333       6.425903       1.029126       0.256496   -9999.000000   -9999.000000       0.083600   -9999.000000
57381     57381     hubei          113.3383       31.6192          114       173     2012      12        11        346              0.247542       4.412476       0.223424       0.266108   -9999.000000   -9999.000000       0.084200       0.023000
57381     57381     hubei          113.3383       31.6192          114       173     2012      12        12        347              0.237958       5.147064       3.493315       0.258813       0.154000       0.051400   -9999.000000   -9999.000000
57381     57381     hubei          113.3383       31.6192          114       173     2012      12        13        348              0.262250       5.892242      13.618171       0.263549       0.193000   -9999.000000   -9999.000000       0.600000
57381     57381     hubei          113.3383       31.6192          114       173     2012      12        14        349              0.256583       5.139496       3.338652       0.307865       0.184000       0.024000       0.086500   -9999.000000
57381     57381     hubei          113.3383       31.6192          114       173     2012      12        15        350              0.000000       4.310516       0.000000       0.294820       0.171000   -9999.000000       0.101100   -9999.000000
57381     57381     hubei          113.3383       31.6192          114       173     2012      12        16        351              0.244042       5.123993       0.000000       0.284180   -9999.000000   -9999.000000       0.099900       0.272000
57381     57381     hubei          113.3383       31.6192          114       173     2012      12        17        352              0.270792       5.241791      18.627659       0.278780   -9999.000000       0.114500   -9999.000000   -9999.000000
57381     57381     hubei          113.3383       31.6192          114       173     2012      12        18        353              0.252625       5.021545       1.183500       0.302345       0.175000   -9999.000000   -9999.000000       0.144000
57381     57381     hubei          113.3383       31.6192          114       173     2012      12        19        354              0.257000       3.296692       2.345949       0.298151       0.177000       0.196600       0.110400   -9999.000000
57381     57381     hubei          113.3383       31.6192          114       173     2012      12        20        355              0.000000       4.585571       0.094491       0.292265   -9999.000000       0.063700       0.102800       0.207000
57381     57381     hubei          113.3383       31.6192          114       173     2012      12        21        356              0.248458       1.967346       0.775604       0.283417   -9999.000000   -9999.000000       0.101300   -9999.000000
57381     57381     hubei          113.3383       31.6192          114       173     2012      12        22        357              0.244583       3.600647       0.000000       0.274882   -9999.000000       0.132600       0.110800   -9999.000000
57381     57381     hubei          113.3383       31.6192          114       173     2012      12        23        358              0.243042       3.096130       0.000000       0.258907       0.147000   -9999.000000   -9999.000000       0.009000
57381     57381     hubei          113.3383       31.6192          114       173     2012      12        24        359              0.249737       2.445404       0.000000       0.246072       0.149000       0.208300   -9999.000000   -9999.000000
57381     57381     hubei          113.3383       31.6192          114       173     2012      12        25        360              0.255667       3.416229       0.000000       0.254019   -9999.000000       0.034800       0.079100       0.148000
57381     57381     hubei          113.3383       31.6192          114       173     2012      12        26        361              0.000000       1.251007       0.327959       0.241396   -9999.000000   -9999.000000       0.091400   -9999.000000
57381     57381     hubei          113.3383       31.6192          114       173     2012      12        27        362              0.251636       0.516754       2.026744       0.214744   -9999.000000       0.143900       0.094400   -9999.000000
57381     57381     hubei          113.3383       31.6192          114       173     2012      12        28        363              0.000000       0.770874       4.164975       0.230544   -9999.000000   -9999.000000       0.097600       0.502000
57381     57381     hubei          113.3383       31.6192          114       173     2012      12        29        364              0.000000       1.109558       6.038718       0.258720   -9999.000000   -9999.000000   -9999.000000   -9999.000000
57381     57381     hubei          113.3383       31.6192          114       173     2012      12        30        365              0.000000       0.728180       1.512726       0.240471       0.133000       0.177600       0.074400       0.040000
57381     57381     hubei          113.3383       31.6192          114       173     2012      12        31        366              0.244400       0.889801       0.166453       0.219062       0.139000   -9999.000000       0.089300   -9999.000000
