# Supplementary material for: Research on Fusing Multisatellite Soil Moisture Data Based on Bayesian Model Averaging
Source: Hindawi journal article supplement (doi:10.1155/2018/9310838), 2018-06-25
Supplement: f1 [file 9310838.f1.zip › 2012_sm00-10cm_daily_ZDB_ZHY_57385_366days_allin.txt]

57385     57385     hubei          113.4897       31.3797          114       174     2012      01        01        001              0.000000   -9999.000000       0.000000   -9999.000000       0.111000   -9999.000000       0.111600   -9999.000000
57385     57385     hubei          113.4897       31.3797          114       174     2012      01        02        002              0.000000       2.562531       0.000000       0.296666   -9999.000000       0.128200       0.125300   -9999.000000
57385     57385     hubei          113.4897       31.3797          114       174     2012      01        03        003              0.000000       2.980591       0.000000       0.318881   -9999.000000       0.118700   -9999.000000       0.108000
57385     57385     hubei          113.4897       31.3797          114       174     2012      01        04        004              0.000000       2.019379       0.000000       0.286169   -9999.000000   -9999.000000   -9999.000000   -9999.000000
57385     57385     hubei          113.4897       31.3797          114       174     2012      01        05        005              0.000000       1.901245       0.000000       0.271476   -9999.000000       0.114400       0.109800       0.023000
57385     57385     hubei          113.4897       31.3797          114       174     2012      01        06        006              0.000000       1.435394       0.000000       0.270168       0.111000   -9999.000000       0.118600   -9999.000000
57385     57385     hubei          113.4897       31.3797          114       174     2012      01        07        007              0.000000       2.949158       0.000000       0.283584   -9999.000000       0.125900       0.132100       0.134000
57385     57385     hubei          113.4897       31.3797          114       174     2012      01        08        008              0.000000       2.443665       0.000000       0.297666       0.114000   -9999.000000   -9999.000000       0.077000
57385     57385     hubei          113.4897       31.3797          114       174     2012      01        09        009              0.000000       3.651367       0.000000       0.306855   -9999.000000   -9999.000000   -9999.000000   -9999.000000
57385     57385     hubei          113.4897       31.3797          114       174     2012      01        10        010              0.000000       4.896576       0.000000       0.309168   -9999.000000       0.096400       0.078100       0.191000
57385     57385     hubei          113.4897       31.3797          114       174     2012      01        11        011              0.000000       3.889435       0.000000       0.307111   -9999.000000   -9999.000000       0.081000   -9999.000000
57385     57385     hubei          113.4897       31.3797          114       174     2012      01        12        012              0.000000       2.549042       0.171791       0.302359       0.141000   -9999.000000       0.082700       0.161000
57385     57385     hubei          113.4897       31.3797          114       174     2012      01        13        013              0.000000       2.436920       3.240035       0.297967       0.138000       0.074600       0.088500   -9999.000000
57385     57385     hubei          113.4897       31.3797          114       174     2012      01        14        014              0.000000       2.531464       0.854019       0.305416   -9999.000000   -9999.000000   -9999.000000   -9999.000000
57385     57385     hubei          113.4897       31.3797          114       174     2012      01        15        015              0.000000       2.172119       2.262556       0.317980   -9999.000000       0.150300   -9999.000000       0.368000
57385     57385     hubei          113.4897       31.3797          114       174     2012      01        16        016              0.000000       3.631042       0.000000       0.313003   -9999.000000       0.117000       0.062600   -9999.000000
57385     57385     hubei          113.4897       31.3797          114       174     2012      01        17        017              0.000000       4.391235       2.013398       0.312731   -9999.000000   -9999.000000       0.077100       0.471000
57385     57385     hubei          113.4897       31.3797          114       174     2012      01        18        018              0.000000       3.354401       0.000000       0.318511   -9999.000000       0.138200       0.079700   -9999.000000
57385     57385     hubei          113.4897       31.3797          114       174     2012      01        19        019              0.000000       3.722992       0.549555       0.315595   -9999.000000   -9999.000000       0.074700   -9999.000000
57385     57385     hubei          113.4897       31.3797          114       174     2012      01        20        020              0.000000       3.675873       1.794824       0.315180   -9999.000000       0.126500   -9999.000000       0.621000
57385     57385     hubei          113.4897       31.3797          114       174     2012      01        21        021              0.000000       3.456024       0.376408       0.317276   -9999.000000       0.140500   -9999.000000   -9999.000000
57385     57385     hubei          113.4897       31.3797          114       174     2012      01        22        022              0.000000       1.113251       0.781442       0.269448   -9999.000000   -9999.000000       0.058600       0.241000
57385     57385     hubei          113.4897       31.3797          114       174     2012      01        23        023              0.000000       0.315002       1.268508       0.241942       0.132000       0.066200       0.090700   -9999.000000
57385     57385     hubei          113.4897       31.3797          114       174     2012      01        24        024              0.000000       1.142273       0.000000       0.252934       0.136000   -9999.000000   -9999.000000   -9999.000000
57385     57385     hubei          113.4897       31.3797          114       174     2012      01        25        025              0.000000       1.823822       0.183028       0.260144   -9999.000000       0.239800   -9999.000000       0.226000
57385     57385     hubei          113.4897       31.3797          114       174     2012      01        26        026              0.000000       2.439819       0.000000       0.265944   -9999.000000       0.080300   -9999.000000   -9999.000000
57385     57385     hubei          113.4897       31.3797          114       174     2012      01        27        027              0.000000       3.421570       1.648668       0.281518   -9999.000000   -9999.000000       0.090600       0.032000
57385     57385     hubei          113.4897       31.3797          114       174     2012      01        28        028              0.000000       1.729858       1.747012       0.285128       0.129000       0.167800       0.096900   -9999.000000
57385     57385     hubei          113.4897       31.3797          114       174     2012      01        29        029              0.000000       4.852325       1.001280       0.299804   -9999.000000   -9999.000000       0.102000       0.342000
57385     57385     hubei          113.4897       31.3797          114       174     2012      01        30        030              0.000000       3.538788       0.040593       0.307232       0.126000       0.269100       0.097000   -9999.000000
57385     57385     hubei          113.4897       31.3797          114       174     2012      01        31        031              0.000000       4.269806       0.049206       0.297302   -9999.000000       0.207200   -9999.000000   -9999.000000
57385     57385     hubei          113.4897       31.3797          114       174     2012      02        01        032              0.000000       5.842010       6.678658       0.301461   -9999.000000   -9999.000000   -9999.000000       0.078000
57385     57385     hubei          113.4897       31.3797          114       174     2012      02        02        033              0.000000       2.381622       0.000000       0.290867       0.128000       0.159900       0.074800   -9999.000000
57385     57385     hubei          113.4897       31.3797          114       174     2012      02        03        034              0.000000       2.923004       0.088537       0.274876       0.122000       0.198200       0.093700       0.146000
57385     57385     hubei          113.4897       31.3797          114       174     2012      02        04        035              0.000000       4.031464       0.000000       0.282689       0.136000   -9999.000000       0.099200   -9999.000000
57385     57385     hubei          113.4897       31.3797          114       174     2012      02        05        036              0.000000       2.824249       0.425860       0.295983   -9999.000000       0.113000       0.105500       0.282000
57385     57385     hubei          113.4897       31.3797          114       174     2012      02        06        037              0.000000       5.249023       0.000000       0.302329   -9999.000000   -9999.000000   -9999.000000       0.181000
57385     57385     hubei          113.4897       31.3797          114       174     2012      02        07        038              0.000000       5.029083       0.000000       0.300606   -9999.000000       0.348000       0.080000   -9999.000000
57385     57385     hubei          113.4897       31.3797          114       174     2012      02        08        039              0.000000       3.593262       0.237255       0.277727   -9999.000000       0.117200       0.076400       0.054000
57385     57385     hubei          113.4897       31.3797          114       174     2012      02        09        040              0.000000       3.755127       0.000000       0.282894   -9999.000000   -9999.000000       0.079500   -9999.000000
57385     57385     hubei          113.4897       31.3797          114       174     2012      02        10        041              0.222706       1.980255       0.159082       0.276612   -9999.000000       0.109200       0.083600       0.075000
57385     57385     hubei          113.4897       31.3797          114       174     2012      02        11        042              0.220917       4.404877       0.000000       0.278913   -9999.000000   -9999.000000   -9999.000000   -9999.000000
57385     57385     hubei          113.4897       31.3797          114       174     2012      02        12        043              0.219250       5.441223       0.000000       0.290043   -9999.000000       0.127200   -9999.000000   -9999.000000
57385     57385     hubei          113.4897       31.3797          114       174     2012      02        13        044              0.219000       3.807709       0.000000       0.293113   -9999.000000       0.066300   -9999.000000       0.194000
57385     57385     hubei          113.4897       31.3797          114       174     2012      02        14        045              0.219792       3.251892       2.140248       0.293632       0.138000   -9999.000000       0.078700   -9999.000000
57385     57385     hubei          113.4897       31.3797          114       174     2012      02        15        046              0.218750       3.516571       0.333349       0.302665   -9999.000000       0.118100       0.077700       0.685000
57385     57385     hubei          113.4897       31.3797          114       174     2012      02        16        047              0.219792       3.542999       0.000000       0.304009   -9999.000000   -9999.000000       0.076000   -9999.000000
57385     57385     hubei          113.4897       31.3797          114       174     2012      02        17        048              0.220167       6.071716       4.606428       0.299047       0.106000   -9999.000000   -9999.000000   -9999.000000
57385     57385     hubei          113.4897       31.3797          114       174     2012      02        18        049              0.220167       5.531006       0.493690       0.287633       0.118000       0.160100   -9999.000000       0.228000
57385     57385     hubei          113.4897       31.3797          114       174     2012      02        19        050              0.220000       5.778473       0.000000       0.284998       0.115000   -9999.000000       0.058400   -9999.000000
57385     57385     hubei          113.4897       31.3797          114       174     2012      02        20        051              0.219043       7.103485       0.000000       0.289749       0.127000       0.032500       0.060200       0.128000
57385     57385     hubei          113.4897       31.3797          114       174     2012      02        21        052              0.220250       5.759552       0.000000       0.292619   -9999.000000       0.094700   -9999.000000   -9999.000000
57385     57385     hubei          113.4897       31.3797          114       174     2012      02        22        053              0.220542       8.959991       0.246237       0.292082       0.111000   -9999.000000       0.061700   -9999.000000
57385     57385     hubei          113.4897       31.3797          114       174     2012      02        23        054              0.219917       8.599670       0.253235       0.292558       0.122500       0.121300   -9999.000000       0.332000
57385     57385     hubei          113.4897       31.3797          114       174     2012      02        24        055              0.219000       6.018677       0.000000       0.293185       0.110000   -9999.000000       0.062800   -9999.000000
57385     57385     hubei          113.4897       31.3797          114       174     2012      02        25        056              0.219125       4.552216       0.000000       0.292578       0.112000       0.084800       0.055800       0.126000
57385     57385     hubei          113.4897       31.3797          114       174     2012      02        26        057              0.220125       4.570892       0.167938       0.290267   -9999.000000       0.250100       0.056600   -9999.000000
57385     57385     hubei          113.4897       31.3797          114       174     2012      02        27        058              0.219783       5.915100       0.081151       0.288126   -9999.000000   -9999.000000   -9999.000000       0.130000
57385     57385     hubei          113.4897       31.3797          114       174     2012      02        28        059              0.220458       6.225769       0.000000       0.287322       0.099000   -9999.000000   -9999.000000   -9999.000000
57385     57385     hubei          113.4897       31.3797          114       174     2012      02        29        060              0.000000   -9999.000000       0.000000   -9999.000000       0.107000   -9999.000000   -9999.000000   -9999.000000
57385     57385     hubei          113.4897       31.3797          114       174     2012      03        01        061              0.218458       8.390961       0.000000       0.284764       0.151000   -9999.000000       0.059300       0.055000
57385     57385     hubei          113.4897       31.3797          114       174     2012      03        02        062              0.217130       6.596069       0.567993       0.286038   -9999.000000       0.098900       0.067300   -9999.000000
57385     57385     hubei          113.4897       31.3797          114       174     2012      03        03        063              0.218417       6.156708       3.797754       0.287641   -9999.000000   -9999.000000       0.069200       0.265000
57385     57385     hubei          113.4897       31.3797          114       174     2012      03        04        064              0.218167       5.096130       0.068744       0.300047   -9999.000000       0.214100       0.076000   -9999.000000
57385     57385     hubei          113.4897       31.3797          114       174     2012      03        05        065              0.218542       3.828583       2.317296       0.302551       0.139000   -9999.000000   -9999.000000       0.195000
57385     57385     hubei          113.4897       31.3797          114       174     2012      03        06        066              0.218208       7.463989       0.440385       0.294947       0.145000   -9999.000000   -9999.000000       0.168000
57385     57385     hubei          113.4897       31.3797          114       174     2012      03        07        067              0.000000       7.905945       0.585189       0.291486   -9999.000000       0.061700       0.059300   -9999.000000
57385     57385     hubei          113.4897       31.3797          114       174     2012      03        08        068              0.217167       7.699280       0.174616       0.292715   -9999.000000   -9999.000000       0.066400       0.250000
57385     57385     hubei          113.4897       31.3797          114       174     2012      03        09        069              0.218458       6.919281       0.000000       0.290933       0.130000       0.115200       0.072100   -9999.000000
57385     57385     hubei          113.4897       31.3797          114       174     2012      03        10        070              0.219261       7.562927       0.000000       0.287782       0.127000   -9999.000000       0.064400       0.175000
57385     57385     hubei          113.4897       31.3797          114       174     2012      03        11        071              0.219043      10.249451       0.366423       0.283488       0.129000       0.167700   -9999.000000   -9999.000000
57385     57385     hubei          113.4897       31.3797          114       174     2012      03        12        072              0.219130       8.862488       0.000000       0.281251       0.139000       0.151200       0.081000   -9999.000000
57385     57385     hubei          113.4897       31.3797          114       174     2012      03        13        073              0.219565       9.834167       0.299731       0.279409   -9999.000000   -9999.000000       0.074000       0.254000
57385     57385     hubei          113.4897       31.3797          114       174     2012      03        14        074              0.218917      12.757233       0.587886       0.276106   -9999.000000       0.227900       0.085700   -9999.000000
57385     57385     hubei          113.4897       31.3797          114       174     2012      03        15        075              0.217958      14.240784       4.287526       0.275361       0.160000   -9999.000000       0.094700       0.436000
57385     57385     hubei          113.4897       31.3797          114       174     2012      03        16        076              0.217565       9.998199       0.056474       0.303645       0.145000       0.099200   -9999.000000   -9999.000000
57385     57385     hubei          113.4897       31.3797          114       174     2012      03        17        077              0.217435      10.445282      31.843903       0.292268       0.144000       0.120800   -9999.000000   -9999.000000
57385     57385     hubei          113.4897       31.3797          114       174     2012      03        18        078              0.218435      12.006439       0.000000       0.287488   -9999.000000   -9999.000000       0.077700       0.329000
57385     57385     hubei          113.4897       31.3797          114       174     2012      03        19        079              0.218542      14.217285       1.565192       0.281511       0.170000       0.183500       0.120500   -9999.000000
57385     57385     hubei          113.4897       31.3797          114       174     2012      03        20        080              0.217696       6.756104       0.254916       0.288908       0.157000       0.113600       0.114800       0.291000
57385     57385     hubei          113.4897       31.3797          114       174     2012      03        21        081              0.229125       7.784851      12.816306       0.288122       0.191000   -9999.000000       0.120200   -9999.000000
57385     57385     hubei          113.4897       31.3797          114       174     2012      03        22        082              0.255458       8.806091       7.323259       0.314842       0.197000       0.178000   -9999.000000   -9999.000000
57385     57385     hubei          113.4897       31.3797          114       174     2012      03        23        083              0.253208       7.493744       0.173095       0.338329   -9999.000000   -9999.000000   -9999.000000       0.445000
57385     57385     hubei          113.4897       31.3797          114       174     2012      03        24        084              0.254042      11.269562       0.000000       0.317429   -9999.000000   -9999.000000   -9999.000000   -9999.000000
57385     57385     hubei          113.4897       31.3797          114       174     2012      03        25        085              0.000000      14.149506       0.000000       0.305210       0.148500       0.339300       0.106200       0.212000
57385     57385     hubei          113.4897       31.3797          114       174     2012      03        26        086              0.255250      16.258820       0.170418       0.297212       0.144000   -9999.000000       0.133900   -9999.000000
57385     57385     hubei          113.4897       31.3797          114       174     2012      03        27        087              0.255625      17.781067       0.576284       0.289787       0.133000       0.222700   -9999.000000       0.382000
57385     57385     hubei          113.4897       31.3797          114       174     2012      03        28        088              0.256333      18.738464       0.065381       0.283856       0.141000   -9999.000000   -9999.000000   -9999.000000
57385     57385     hubei          113.4897       31.3797          114       174     2012      03        29        089              0.256000      19.836212       0.269407       0.279033   -9999.000000       0.146900       0.128000   -9999.000000
57385     57385     hubei          113.4897       31.3797          114       174     2012      03        30        090              0.255625      17.285034       0.386368       0.282780   -9999.000000       0.097300       0.120800       0.156000
57385     57385     hubei          113.4897       31.3797          114       174     2012      03        31        091              0.254333      14.756653       0.000000       0.284629       0.132500   -9999.000000       0.123000   -9999.000000
57385     57385     hubei          113.4897       31.3797          114       174     2012      04        01        092              0.251583      17.889832       0.610402       0.273380       0.159000       0.138900       0.120400       0.349000
57385     57385     hubei          113.4897       31.3797          114       174     2012      04        02        093              0.248458      19.948639       0.000000       0.265319       0.160000       0.189300   -9999.000000   -9999.000000
57385     57385     hubei          113.4897       31.3797          114       174     2012      04        03        094              0.245125      18.200775       0.000000       0.260705   -9999.000000       0.153400   -9999.000000       0.330000
57385     57385     hubei          113.4897       31.3797          114       174     2012      04        04        095              0.242917      17.595642       0.274173       0.256511       0.167000       0.248600       0.090500       0.043000
57385     57385     hubei          113.4897       31.3797          114       174     2012      04        05        096              0.242458      16.145782       0.000000       0.256182       0.153500   -9999.000000       0.098000   -9999.000000
57385     57385     hubei          113.4897       31.3797          114       174     2012      04        06        097              0.241000      17.599670       0.000000       0.254857       0.148500       0.242600       0.094400       0.225000
57385     57385     hubei          113.4897       31.3797          114       174     2012      04        07        098              0.242292      20.254700       0.000000       0.247289       0.143000       0.152400       0.090100   -9999.000000
57385     57385     hubei          113.4897       31.3797          114       174     2012      04        08        099              0.242958      21.345062       0.150565       0.239233   -9999.000000   -9999.000000   -9999.000000       0.314000
57385     57385     hubei          113.4897       31.3797          114       174     2012      04        09        100              0.252375      21.073639       2.577171       0.236828       0.179000       0.333000   -9999.000000   -9999.000000
57385     57385     hubei          113.4897       31.3797          114       174     2012      04        10        101              0.249208      18.360962       0.022707       0.266020       0.165000   -9999.000000       0.111100   -9999.000000
57385     57385     hubei          113.4897       31.3797          114       174     2012      04        11        102              0.249625      19.720673       0.000000       0.258541       0.179000       0.058400       0.117600       0.422000
57385     57385     hubei          113.4897       31.3797          114       174     2012      04        12        103              0.248375      21.516113       4.333651       0.252232       0.214000   -9999.000000       0.135000   -9999.000000
57385     57385     hubei          113.4897       31.3797          114       174     2012      04        13        104              0.247667      14.874298       0.389954       0.280384   -9999.000000   -9999.000000   -9999.000000       0.197000
57385     57385     hubei          113.4897       31.3797          114       174     2012      04        14        105              0.246130      18.562653       0.219260       0.264840       0.190000       0.117800   -9999.000000   -9999.000000
57385     57385     hubei          113.4897       31.3797          114       174     2012      04        15        106              0.245042      14.927582       0.000000       0.263371       0.171000   -9999.000000       0.110900   -9999.000000
57385     57385     hubei          113.4897       31.3797          114       174     2012      04        16        107              0.244708      16.828064       0.000000       0.258543       0.168000       0.114600       0.119000       0.383000
57385     57385     hubei          113.4897       31.3797          114       174     2012      04        17        108              0.244375      20.603943       0.069856       0.250801       0.181500       0.086000       0.116300   -9999.000000
57385     57385     hubei          113.4897       31.3797          114       174     2012      04        18        109              0.243042      19.851532       0.902425       0.247850       0.169000   -9999.000000   -9999.000000       0.216000
57385     57385     hubei          113.4897       31.3797          114       174     2012      04        19        110              0.243417      21.275391       0.000000       0.241753   -9999.000000       0.053900   -9999.000000   -9999.000000
57385     57385     hubei          113.4897       31.3797          114       174     2012      04        20        111              0.240875      23.947906       0.108313       0.231505       0.190000       0.120400   -9999.000000   -9999.000000
57385     57385     hubei          113.4897       31.3797          114       174     2012      04        21        112              0.240292      19.435211       0.000000       0.232835       0.194500       0.090700       0.102400       0.302000
57385     57385     hubei          113.4897       31.3797          114       174     2012      04        22        113              0.240458      23.157898       3.659424       0.224011       0.190500       0.111100       0.119000   -9999.000000
57385     57385     hubei          113.4897       31.3797          114       174     2012      04        23        114              0.241417      25.624847       1.352197       0.232479       0.191000   -9999.000000       0.119000       0.585000
57385     57385     hubei          113.4897       31.3797          114       174     2012      04        24        115              0.242208      24.983398       5.089942       0.246699   -9999.000000       0.278400       0.138700   -9999.000000
57385     57385     hubei          113.4897       31.3797          114       174     2012      04        25        116              0.000000      20.914215       0.160156       0.277338       0.227000       0.139400   -9999.000000       0.320000
57385     57385     hubei          113.4897       31.3797          114       174     2012      04        26        117              0.248750      20.140808       0.000000       0.256437       0.201000   -9999.000000   -9999.000000   -9999.000000
57385     57385     hubei          113.4897       31.3797          114       174     2012      04        27        118              0.255792      22.765320       0.000000       0.236812       0.198000       0.120300   -9999.000000   -9999.000000
57385     57385     hubei          113.4897       31.3797          114       174     2012      04        28        119              0.254833      25.561493       3.116455       0.222420       0.197000   -9999.000000       0.125400       0.556000
57385     57385     hubei          113.4897       31.3797          114       174     2012      04        29        120              0.253292      25.194275       0.719092       0.238657   -9999.000000       0.108700       0.125000   -9999.000000
57385     57385     hubei          113.4897       31.3797          114       174     2012      04        30        121              0.255500      25.019836       9.449512       0.236275       0.278000       0.167900   -9999.000000       0.844000
57385     57385     hubei          113.4897       31.3797          114       174     2012      05        01        122              0.253375      21.922150       0.000000       0.290233       0.253000   -9999.000000   -9999.000000   -9999.000000
57385     57385     hubei          113.4897       31.3797          114       174     2012      05        02        123              0.252458      21.566406       0.602856       0.273314       0.229000       0.146400       0.118000       0.298000
57385     57385     hubei          113.4897       31.3797          114       174     2012      05        03        124              0.253875      23.473938       0.237640       0.261636       0.216000   -9999.000000       0.121300       0.394000
57385     57385     hubei          113.4897       31.3797          114       174     2012      05        04        125              0.258083      23.287537       0.000000       0.259018   -9999.000000   -9999.000000       0.119700   -9999.000000
57385     57385     hubei          113.4897       31.3797          114       174     2012      05        05        126              0.259833      24.193878       0.000000       0.248930       0.214000   -9999.000000       0.119400       0.367000
57385     57385     hubei          113.4897       31.3797          114       174     2012      05        06        127              0.258583      27.328918       1.368525       0.232974       0.184000   -9999.000000   -9999.000000   -9999.000000
57385     57385     hubei          113.4897       31.3797          114       174     2012      05        07        128              0.273667      28.934082      10.741465       0.218522   -9999.000000   -9999.000000   -9999.000000       0.861000
57385     57385     hubei          113.4897       31.3797          114       174     2012      05        08        129              0.278542      25.048431       0.098016       0.290689       0.237500       0.239500       0.126000   -9999.000000
57385     57385     hubei          113.4897       31.3797          114       174     2012      05        09        130              0.302917      27.467041       1.186592       0.266912       0.244000       0.073200       0.145500   -9999.000000
57385     57385     hubei          113.4897       31.3797          114       174     2012      05        10        131              0.313875      25.295807       1.181440       0.260858   -9999.000000   -9999.000000       0.145300       0.433000
57385     57385     hubei          113.4897       31.3797          114       174     2012      05        11        132              0.312875      27.539886       1.856658       0.248389   -9999.000000   -9999.000000       0.128100   -9999.000000
57385     57385     hubei          113.4897       31.3797          114       174     2012      05        12        133              0.313542      28.944519      14.818954       0.238784       0.280500       0.189600   -9999.000000       0.854000
57385     57385     hubei          113.4897       31.3797          114       174     2012      05        13        134              0.320750      21.312805       9.442687       0.321910       0.219000       0.426500       0.162400   -9999.000000
57385     57385     hubei          113.4897       31.3797          114       174     2012      05        14        135              0.326000      23.226166       0.240515       0.315263       0.258000       0.220700       0.141400   -9999.000000
57385     57385     hubei          113.4897       31.3797          114       174     2012      05        15        136              0.323458      21.560486       0.000000       0.305850   -9999.000000       0.178800       0.144600       0.550000
57385     57385     hubei          113.4897       31.3797          114       174     2012      05        16        137              0.322917      23.982635       0.000000       0.287500       0.247000   -9999.000000       0.148600   -9999.000000
57385     57385     hubei          113.4897       31.3797          114       174     2012      05        17        138              0.321167      26.484802       0.000000       0.271081       0.219500       0.158200   -9999.000000       0.259000
57385     57385     hubei          113.4897       31.3797          114       174     2012      05        18        139              0.317542      27.976532       0.453640       0.255330       0.289000       0.310400   -9999.000000   -9999.000000
57385     57385     hubei          113.4897       31.3797          114       174     2012      05        19        140              0.313458      25.025574       0.000000       0.254680       0.220000   -9999.000000       0.128100   -9999.000000
57385     57385     hubei          113.4897       31.3797          114       174     2012      05        20        141              0.305208      25.802094       0.000000       0.244965   -9999.000000       0.075900       0.136300       0.320000
57385     57385     hubei          113.4897       31.3797          114       174     2012      05        21        142              0.294625      26.536407       0.000000       0.229743       0.249000   -9999.000000       0.127200   -9999.000000
57385     57385     hubei          113.4897       31.3797          114       174     2012      05        22        143              0.285250      26.303040       3.326313       0.222839       0.254500       0.293200       0.112700       0.785000
57385     57385     hubei          113.4897       31.3797          114       174     2012      05        23        144              0.280417      24.768860       0.568451       0.243332   -9999.000000   -9999.000000   -9999.000000   -9999.000000
57385     57385     hubei          113.4897       31.3797          114       174     2012      05        24        145              0.278167      24.027313       3.875224       0.252182       0.264000   -9999.000000   -9999.000000       0.725000
57385     57385     hubei          113.4897       31.3797          114       174     2012      05        25        146              0.000000      22.109222       0.855175       0.273084   -9999.000000       0.092600       0.119300   -9999.000000
57385     57385     hubei          113.4897       31.3797          114       174     2012      05        26        147              0.275583      21.434570       0.000000       0.269025       0.269000       0.307900       0.126300   -9999.000000
57385     57385     hubei          113.4897       31.3797          114       174     2012      05        27        148              0.272375      26.191864      12.661421       0.250249       0.283000       0.143600       0.130400       0.278000
57385     57385     hubei          113.4897       31.3797          114       174     2012      05        28        149              0.267833      27.502960       0.345958       0.234472       0.243500       0.233300       0.118800   -9999.000000
57385     57385     hubei          113.4897       31.3797          114       174     2012      05        29        150              0.321542      28.890747      29.517523       0.223134       0.365000   -9999.000000   -9999.000000       0.941000
57385     57385     hubei          113.4897       31.3797          114       174     2012      05        30        151              0.327208      21.798218       0.000000       0.344308       0.311000       0.303800       0.151500   -9999.000000
57385     57385     hubei          113.4897       31.3797          114       174     2012      05        31        152              0.323917      25.462616       0.000000       0.305664   -9999.000000       0.223100   -9999.000000   -9999.000000
57385     57385     hubei          113.4897       31.3797          114       174     2012      06        01        153              0.321333      25.579376       0.641893       0.288835       0.289000       0.106100       0.145200       0.630000
57385     57385     hubei          113.4897       31.3797          114       174     2012      06        02        154              0.318917      23.122406       0.000000       0.289408       0.264500       0.396700       0.145500   -9999.000000
57385     57385     hubei          113.4897       31.3797          114       174     2012      06        03        155              0.314375      25.861511       0.083599       0.277147       0.267000   -9999.000000   -9999.000000       0.487000
57385     57385     hubei          113.4897       31.3797          114       174     2012      06        04        156              0.307125      26.163940       0.094192       0.268676       0.260000       0.232800   -9999.000000   -9999.000000
57385     57385     hubei          113.4897       31.3797          114       174     2012      06        05        157              0.300083      27.308197      10.529315       0.258531   -9999.000000       0.294600       0.157800       0.793000
57385     57385     hubei          113.4897       31.3797          114       174     2012      06        06        158              0.301458      27.184601       1.007933       0.291057       0.285000   -9999.000000       0.149500   -9999.000000
57385     57385     hubei          113.4897       31.3797          114       174     2012      06        07        159              0.302917      26.128571       0.162940       0.301043       0.257500       0.291900       0.157600   -9999.000000
57385     57385     hubei          113.4897       31.3797          114       174     2012      06        08        160              0.299833      28.958832       0.000000       0.281039       0.252000   -9999.000000       0.138700       0.600000
57385     57385     hubei          113.4897       31.3797          114       174     2012      06        09        161              0.292625      31.076202       0.000000       0.264327       0.245000   -9999.000000   -9999.000000   -9999.000000
57385     57385     hubei          113.4897       31.3797          114       174     2012      06        10        162              0.284167      32.203217       0.108010       0.249564   -9999.000000       0.401000   -9999.000000       0.453000
57385     57385     hubei          113.4897       31.3797          114       174     2012      06        11        163              0.000000      30.431061       0.727386       0.237258       0.245000   -9999.000000       0.137100   -9999.000000
57385     57385     hubei          113.4897       31.3797          114       174     2012      06        12        164              0.269458      28.464081       0.000000       0.230526       0.226500       0.203400       0.153900   -9999.000000
57385     57385     hubei          113.4897       31.3797          114       174     2012      06        13        165              0.260125      31.170471       0.000000       0.213392       0.241500   -9999.000000       0.159200       0.496000
57385     57385     hubei          113.4897       31.3797          114       174     2012      06        14        166              0.253375      32.244446       0.319081       0.200292       0.249000   -9999.000000       0.155400   -9999.000000
57385     57385     hubei          113.4897       31.3797          114       174     2012      06        15        167              0.247000      30.131287       0.000000       0.197255       0.236000       0.285100   -9999.000000       0.461000
57385     57385     hubei          113.4897       31.3797          114       174     2012      06        16        168              0.241458      31.720093       0.078143       0.187169   -9999.000000   -9999.000000       0.150200   -9999.000000
57385     57385     hubei          113.4897       31.3797          114       174     2012      06        17        169              0.237500      31.470062       0.488565       0.181838       0.227000       0.225600       0.139600   -9999.000000
57385     57385     hubei          113.4897       31.3797          114       174     2012      06        18        170              0.235208      30.376587       0.881834       0.179188       0.212500       0.469400       0.126800       0.520000
57385     57385     hubei          113.4897       31.3797          114       174     2012      06        19        171              0.233250      32.489136       0.000000       0.175644       0.217500       0.202900       0.128100   -9999.000000
57385     57385     hubei          113.4897       31.3797          114       174     2012      06        20        172              0.231042      33.673126       5.599827       0.172150       0.207000       0.128900   -9999.000000       0.298000
57385     57385     hubei          113.4897       31.3797          114       174     2012      06        21        173              0.229333      34.187622       2.453746       0.169900   -9999.000000   -9999.000000   -9999.000000   -9999.000000
57385     57385     hubei          113.4897       31.3797          114       174     2012      06        22        174              0.227667      34.313782       0.000000       0.169061       0.212000   -9999.000000       0.108400       0.272000
57385     57385     hubei          113.4897       31.3797          114       174     2012      06        23        175              0.225500      34.879944       0.000000       0.167487       0.212500       0.194200       0.119300   -9999.000000
57385     57385     hubei          113.4897       31.3797          114       174     2012      06        24        176              0.223375      35.060699       0.000000       0.166409       0.209500   -9999.000000       0.116300   -9999.000000
57385     57385     hubei          113.4897       31.3797          114       174     2012      06        25        177              0.221667      35.962280       0.848870       0.164522       0.203000       0.173100       0.078100       0.284000
57385     57385     hubei          113.4897       31.3797          114       174     2012      06        26        178              0.224417      33.225159      11.178977       0.171099   -9999.000000   -9999.000000   -9999.000000   -9999.000000
57385     57385     hubei          113.4897       31.3797          114       174     2012      06        27        179              0.283750      29.828583      34.526176       0.244867   -9999.000000   -9999.000000   -9999.000000       1.000000
57385     57385     hubei          113.4897       31.3797          114       174     2012      06        28        180              0.389417      26.650574      27.868101       0.346145       0.265000       0.290300       0.090000   -9999.000000
57385     57385     hubei          113.4897       31.3797          114       174     2012      06        29        181              0.386417      26.726166       2.572449       0.370189       0.256000   -9999.000000       0.096600       1.000000
57385     57385     hubei          113.4897       31.3797          114       174     2012      06        30        182              0.383708      29.520691       2.358890       0.339380       0.274000       0.334200       0.105400   -9999.000000
57385     57385     hubei          113.4897       31.3797          114       174     2012      07        01        183              0.381818      26.739685       0.756227       0.330990   -9999.000000       0.166800   -9999.000000   -9999.000000
57385     57385     hubei          113.4897       31.3797          114       174     2012      07        02        184              0.379625      27.982117       0.000000       0.319025       0.292000   -9999.000000   -9999.000000       0.690000
57385     57385     hubei          113.4897       31.3797          114       174     2012      07        03        185              0.372792      31.341797       4.466636       0.305185       0.272500       0.265000       0.106000   -9999.000000
57385     57385     hubei          113.4897       31.3797          114       174     2012      07        04        186              0.360333      32.245636       0.579389       0.293824       0.278500   -9999.000000       0.102300       0.435000
57385     57385     hubei          113.4897       31.3797          114       174     2012      07        05        187              0.357708      31.613312      16.774746       0.285171   -9999.000000       0.205900       0.119900   -9999.000000
57385     57385     hubei          113.4897       31.3797          114       174     2012      07        06        188              0.388667      28.929321       0.000000       0.316852   -9999.000000       0.504500       0.114800   -9999.000000
57385     57385     hubei          113.4897       31.3797          114       174     2012      07        07        189              0.383000      31.081696       0.197459       0.323448   -9999.000000   -9999.000000   -9999.000000       0.636000
57385     57385     hubei          113.4897       31.3797          114       174     2012      07        08        190              0.376875      32.591095       0.000000       0.302262       0.265000       0.250900   -9999.000000   -9999.000000
57385     57385     hubei          113.4897       31.3797          114       174     2012      07        09        191              0.365333      33.181793       0.000000       0.286828       0.261500   -9999.000000       0.102200       0.450000
57385     57385     hubei          113.4897       31.3797          114       174     2012      07        10        192              0.367375      33.324432       4.666199       0.273083       0.267000       0.237700       0.116300   -9999.000000
57385     57385     hubei          113.4897       31.3797          114       174     2012      07        11        193              0.377833      31.441559       0.920212       0.283986       0.261000       0.369200       0.114600   -9999.000000
57385     57385     hubei          113.4897       31.3797          114       174     2012      07        12        194              0.389583      33.013397       3.065035       0.275805   -9999.000000   -9999.000000       0.114700       0.691000
57385     57385     hubei          113.4897       31.3797          114       174     2012      07        13        195              0.391174      29.668823       6.987569       0.287776       0.337000       0.290300   -9999.000000   -9999.000000
57385     57385     hubei          113.4897       31.3797          114       174     2012      07        14        196              0.391458      28.442078       0.124099       0.305630       0.328500   -9999.000000   -9999.000000       0.641000
57385     57385     hubei          113.4897       31.3797          114       174     2012      07        15        197              0.389458      29.823578       0.000000       0.291931       0.297500       0.505500       0.103500   -9999.000000
57385     57385     hubei          113.4897       31.3797          114       174     2012      07        16        198              0.388458      29.545013       0.000000       0.279152       0.270000       0.189800       0.106300   -9999.000000
57385     57385     hubei          113.4897       31.3797          114       174     2012      07        17        199              0.386542      30.431885       1.300553       0.266018   -9999.000000   -9999.000000       0.103800       0.507000
57385     57385     hubei          113.4897       31.3797          114       174     2012      07        18        200              0.378250      30.757416       0.000000       0.253813       0.291000       0.235800   -9999.000000   -9999.000000
57385     57385     hubei          113.4897       31.3797          114       174     2012      07        19        201              0.380083      31.085999       2.836086       0.241389       0.296000       0.105800   -9999.000000       0.375000
57385     57385     hubei          113.4897       31.3797          114       174     2012      07        20        202              0.369542      32.085205       0.648218       0.230319       0.286500   -9999.000000       0.100200   -9999.000000
57385     57385     hubei          113.4897       31.3797          114       174     2012      07        21        203              0.344826      32.318726       0.000000       0.224712       0.325500       0.365500       0.103600       0.462000
57385     57385     hubei          113.4897       31.3797          114       174     2012      07        22        204              0.322958      34.609375       0.278810       0.213144       0.321000   -9999.000000       0.105300   -9999.000000
57385     57385     hubei          113.4897       31.3797          114       174     2012      07        23        205              0.314542      33.500031       1.383701       0.205919   -9999.000000       0.135300       0.136700   -9999.000000
57385     57385     hubei          113.4897       31.3797          114       174     2012      07        24        206              0.300917      33.674469       0.554476       0.208765       0.335000       0.322600   -9999.000000       0.282000
57385     57385     hubei          113.4897       31.3797          114       174     2012      07        25        207              0.285750      34.162262       0.000000       0.204684       0.324500       0.232500   -9999.000000   -9999.000000
57385     57385     hubei          113.4897       31.3797          114       174     2012      07        26        208              0.271875      35.755646       0.000000       0.192984       0.313500       0.173100       0.121100       0.426000
57385     57385     hubei          113.4897       31.3797          114       174     2012      07        27        209              0.262042      36.118744       0.294296       0.185226       0.310000   -9999.000000       0.142100   -9999.000000
57385     57385     hubei          113.4897       31.3797          114       174     2012      07        28        210              0.256292      35.955963       3.813959       0.182388   -9999.000000       0.197400       0.137300       0.412000
57385     57385     hubei          113.4897       31.3797          114       174     2012      07        29        211              0.252292      36.681030       0.000000       0.177603       0.308000       0.272300       0.137300       0.233000
57385     57385     hubei          113.4897       31.3797          114       174     2012      07        30        212              0.248875      37.185730       0.000000       0.173527       0.291000   -9999.000000   -9999.000000   -9999.000000
57385     57385     hubei          113.4897       31.3797          114       174     2012      07        31        213              0.246250      37.690338       4.413272       0.170954       0.316500       0.197500       0.152700       0.358000
57385     57385     hubei          113.4897       31.3797          114       174     2012      08        01        214              0.243125      38.017395       0.060020       0.179882       0.307000   -9999.000000       0.144900   -9999.000000
57385     57385     hubei          113.4897       31.3797          114       174     2012      08        02        215              0.240042      34.260010       0.000000       0.210432       0.277000       0.144700       0.147200       0.355000
57385     57385     hubei          113.4897       31.3797          114       174     2012      08        03        216              0.237125      33.436401       0.000000       0.186457   -9999.000000       0.062800       0.147400   -9999.000000
57385     57385     hubei          113.4897       31.3797          114       174     2012      08        04        217              0.234583      34.654114       0.081672       0.174212       0.327000   -9999.000000   -9999.000000   -9999.000000
57385     57385     hubei          113.4897       31.3797          114       174     2012      08        05        218              0.234083      31.418884       1.837494       0.173769       0.308500       0.073600   -9999.000000       0.642000
57385     57385     hubei          113.4897       31.3797          114       174     2012      08        06        219              0.232875      33.194061       0.000000       0.188501       0.294000       0.038900       0.123000   -9999.000000
57385     57385     hubei          113.4897       31.3797          114       174     2012      08        07        220              0.223917      34.182953       0.000000       0.175544       0.280000   -9999.000000       0.122700       0.354000
57385     57385     hubei          113.4897       31.3797          114       174     2012      08        08        221              0.215000      34.869995       0.000000       0.165569   -9999.000000       0.115500       0.128800   -9999.000000
57385     57385     hubei          113.4897       31.3797          114       174     2012      08        09        222              0.215000      35.162598       0.385832       0.162195       0.336000   -9999.000000       0.130800   -9999.000000
57385     57385     hubei          113.4897       31.3797          114       174     2012      08        10        223              0.215000      34.870514       0.408231       0.160785       0.321500       0.092500   -9999.000000       0.568000
57385     57385     hubei          113.4897       31.3797          114       174     2012      08        11        224              0.215000      32.183685       0.325151       0.164268       0.285000       0.133500   -9999.000000   -9999.000000
57385     57385     hubei          113.4897       31.3797          114       174     2012      08        12        225              0.215000      32.595459       0.000000       0.163577       0.244000       0.155700       0.118800       0.460000
57385     57385     hubei          113.4897       31.3797          114       174     2012      08        13        226              0.215000      35.783966       0.848200       0.158468   -9999.000000       0.193600       0.169800   -9999.000000
57385     57385     hubei          113.4897       31.3797          114       174     2012      08        14        227              0.215000      31.917725       2.037010       0.160933   -9999.000000   -9999.000000       0.171000   -9999.000000
57385     57385     hubei          113.4897       31.3797          114       174     2012      08        15        228              0.215000      30.560913       0.343732       0.188418       0.287000       0.136100       0.154400       0.433000
57385     57385     hubei          113.4897       31.3797          114       174     2012      08        16        229              0.215000      32.097748       0.000000       0.173292       0.267000       0.177500   -9999.000000   -9999.000000
57385     57385     hubei          113.4897       31.3797          114       174     2012      08        17        230              0.215000      33.856781       0.000000       0.161187       0.267500   -9999.000000       0.164000       0.227000
57385     57385     hubei          113.4897       31.3797          114       174     2012      08        18        231              0.215000      36.643951      10.980742       0.157002   -9999.000000       0.291700       0.158700   -9999.000000
57385     57385     hubei          113.4897       31.3797          114       174     2012      08        19        232              0.215000      32.989410       1.227803       0.255725   -9999.000000   -9999.000000       0.163600       0.424000
57385     57385     hubei          113.4897       31.3797          114       174     2012      08        20        233              0.215458      32.741669      27.241964       0.230526   -9999.000000       0.234700       0.137900   -9999.000000
57385     57385     hubei          113.4897       31.3797          114       174     2012      08        21        234              0.216000      30.943115       6.000056       0.285973       0.304000       0.235700   -9999.000000   -9999.000000
57385     57385     hubei          113.4897       31.3797          114       174     2012      08        22        235              0.216000      25.993866       0.779607       0.327047       0.272500   -9999.000000   -9999.000000   -9999.000000
57385     57385     hubei          113.4897       31.3797          114       174     2012      08        23        236              0.216000      24.292358       0.000000       0.293880       0.256000       0.199400       0.133900   -9999.000000
57385     57385     hubei          113.4897       31.3797          114       174     2012      08        24        237              0.216000      25.454132       0.000000       0.273708   -9999.000000       0.110700       0.143700       0.601000
57385     57385     hubei          113.4897       31.3797          114       174     2012      08        25        238              0.000000      27.351196       0.000000       0.257438   -9999.000000       0.146900       0.136700   -9999.000000
57385     57385     hubei          113.4897       31.3797          114       174     2012      08        26        239              0.215667      29.322632       9.587870       0.243414       0.305000       0.212600       0.141000       0.863000
57385     57385     hubei          113.4897       31.3797          114       174     2012      08        27        240              0.261875      26.511078       0.535034       0.292570       0.275500   -9999.000000   -9999.000000       0.390000
57385     57385     hubei          113.4897       31.3797          114       174     2012      08        28        241              0.287000      27.341248       1.077602       0.278166       0.267000       0.219700   -9999.000000   -9999.000000
57385     57385     hubei          113.4897       31.3797          114       174     2012      08        29        242              0.282875      29.393890       0.000000       0.260090       0.247000       0.372700       0.145700       0.473000
57385     57385     hubei          113.4897       31.3797          114       174     2012      08        30        243              0.277667      31.157135       0.000000       0.243602   -9999.000000       0.126000       0.163200   -9999.000000
57385     57385     hubei          113.4897       31.3797          114       174     2012      08        31        244              0.271292      31.089783       3.402273       0.231310       0.259000       0.342500       0.164300       0.380000
57385     57385     hubei          113.4897       31.3797          114       174     2012      09        01        245              0.264125      31.207397       3.271757       0.221924       0.229500   -9999.000000   -9999.000000   -9999.000000
57385     57385     hubei          113.4897       31.3797          114       174     2012      09        02        246              0.257458      32.616425       0.759529       0.208879       0.255000       0.317900   -9999.000000   -9999.000000
57385     57385     hubei          113.4897       31.3797          114       174     2012      09        03        247              0.248542      27.158966       0.000000       0.207222       0.234000       0.271000       0.132400       0.348000
57385     57385     hubei          113.4897       31.3797          114       174     2012      09        04        248              0.237458      29.009003       0.374197       0.197928   -9999.000000       0.136600       0.131400   -9999.000000
57385     57385     hubei          113.4897       31.3797          114       174     2012      09        05        249              0.228833      29.583954       0.000000       0.189726       0.232000       0.293400       0.136700       0.354000
57385     57385     hubei          113.4897       31.3797          114       174     2012      09        06        250              0.223917      30.261475       1.312039       0.180046       0.251000   -9999.000000       0.134300   -9999.000000
57385     57385     hubei          113.4897       31.3797          114       174     2012      09        07        251              0.228667      29.739044       6.976015       0.182867       0.238000   -9999.000000   -9999.000000   -9999.000000
57385     57385     hubei          113.4897       31.3797          114       174     2012      09        08        252              0.314208      29.880035      33.996464       0.214824   -9999.000000       0.225900   -9999.000000       0.885000
57385     57385     hubei          113.4897       31.3797          114       174     2012      09        09        253              0.325750      24.271515       1.170491       0.355130       0.277000   -9999.000000       0.138500   -9999.000000
57385     57385     hubei          113.4897       31.3797          114       174     2012      09        10        254              0.324000      25.444977       0.712197       0.309261   -9999.000000       0.208500       0.180600       0.380000
57385     57385     hubei          113.4897       31.3797          114       174     2012      09        11        255              0.322167      26.291656       3.948548       0.295005       0.208000   -9999.000000       0.197700   -9999.000000
57385     57385     hubei          113.4897       31.3797          114       174     2012      09        12        256              0.319875      25.405151       3.544477       0.299443       0.208000       0.184200       0.168400   -9999.000000
57385     57385     hubei          113.4897       31.3797          114       174     2012      09        13        257              0.316783      23.092072       0.000000       0.309850       0.195500       0.231800   -9999.000000       0.519000
57385     57385     hubei          113.4897       31.3797          114       174     2012      09        14        258              0.312500      22.212494       0.000000       0.293541       0.187000   -9999.000000   -9999.000000   -9999.000000
57385     57385     hubei          113.4897       31.3797          114       174     2012      09        15        259              0.303292      23.264740       0.000000       0.278767   -9999.000000       0.135600       0.156500       0.253000
57385     57385     hubei          113.4897       31.3797          114       174     2012      09        16        260              0.291917      23.454071       1.412310       0.267625       0.189000       0.472300       0.167800   -9999.000000
57385     57385     hubei          113.4897       31.3797          114       174     2012      09        17        261              0.281250      23.754211       0.000000       0.260241       0.189000       0.111200       0.122000       0.406000
57385     57385     hubei          113.4897       31.3797          114       174     2012      09        18        262              0.270708      23.827820       0.000000       0.253467       0.186000       0.295500   -9999.000000   -9999.000000
57385     57385     hubei          113.4897       31.3797          114       174     2012      09        19        263              0.260417      24.930023       2.750834       0.245392       0.192000   -9999.000000   -9999.000000   -9999.000000
57385     57385     hubei          113.4897       31.3797          114       174     2012      09        20        264              0.251083      25.919525       0.124942       0.236789   -9999.000000       0.281000       0.110200       0.298000
57385     57385     hubei          113.4897       31.3797          114       174     2012      09        21        265              0.245125      27.334961       0.399283       0.228998   -9999.000000       0.176800       0.113800   -9999.000000
57385     57385     hubei          113.4897       31.3797          114       174     2012      09        22        266              0.239833      23.922913       0.000000       0.230821       0.184500       0.165100       0.112500       0.316000
57385     57385     hubei          113.4897       31.3797          114       174     2012      09        23        267              0.235875      26.472504       0.281682       0.222681       0.183500       0.197100       0.122100   -9999.000000
57385     57385     hubei          113.4897       31.3797          114       174     2012      09        24        268              0.231500      25.371277       0.000000       0.219304       0.183000   -9999.000000   -9999.000000       0.255000
57385     57385     hubei          113.4897       31.3797          114       174     2012      09        25        269              0.227583      26.612976       0.354499       0.209931       0.195000       0.138500   -9999.000000       0.187000
57385     57385     hubei          113.4897       31.3797          114       174     2012      09        26        270              0.225458      27.280640       0.000000       0.203438   -9999.000000       0.219500       0.123900   -9999.000000
57385     57385     hubei          113.4897       31.3797          114       174     2012      09        27        271              0.224143      25.846497       0.000000       0.200487       0.170000   -9999.000000       0.137200       0.339000
57385     57385     hubei          113.4897       31.3797          114       174     2012      09        28        272              0.219875      26.807343       0.000000       0.193629       0.175000   -9999.000000       0.144000   -9999.000000
57385     57385     hubei          113.4897       31.3797          114       174     2012      09        29        273              0.217500      23.445038       0.000000       0.184991       0.179500   -9999.000000       0.134600       0.181000
57385     57385     hubei          113.4897       31.3797          114       174     2012      09        30        274              0.215708      23.349426       0.000000       0.180996       0.192000       0.179100   -9999.000000   -9999.000000
57385     57385     hubei          113.4897       31.3797          114       174     2012      10        01        275              0.214167      22.317780       0.000000       0.180261   -9999.000000   -9999.000000       0.098500   -9999.000000
57385     57385     hubei          113.4897       31.3797          114       174     2012      10        02        276              0.213250      23.882935       0.233069       0.177413       0.158000   -9999.000000       0.090300       0.318000
57385     57385     hubei          113.4897       31.3797          114       174     2012      10        03        277              0.212125      24.984589       0.000000       0.175439       0.157500   -9999.000000       0.095200   -9999.000000
57385     57385     hubei          113.4897       31.3797          114       174     2012      10        04        278              0.211167      22.993958       0.115506       0.176550       0.157500       0.209400       0.094700       0.251000
57385     57385     hubei          113.4897       31.3797          114       174     2012      10        05        279              0.210500      23.567902       0.168223       0.177170       0.173000       0.107600   -9999.000000   -9999.000000
57385     57385     hubei          113.4897       31.3797          114       174     2012      10        06        280              0.209792      21.772064       0.037775       0.182165       0.179000       0.239200   -9999.000000   -9999.000000
57385     57385     hubei          113.4897       31.3797          114       174     2012      10        07        281              0.209583      23.906342       0.263169       0.180124   -9999.000000   -9999.000000       0.091400       0.511000
57385     57385     hubei          113.4897       31.3797          114       174     2012      10        08        282              0.209625      22.951874       0.394603       0.179947       0.170000       0.125600       0.080100   -9999.000000
57385     57385     hubei          113.4897       31.3797          114       174     2012      10        09        283              0.209250      24.732117       0.000000       0.180399       0.164500       0.294500       0.082300       0.204000
57385     57385     hubei          113.4897       31.3797          114       174     2012      10        10        284              0.208333      23.962219       0.302481       0.176703       0.163000       0.059500       0.080700   -9999.000000
57385     57385     hubei          113.4897       31.3797          114       174     2012      10        11        285              0.207500      23.845520       0.000000       0.171829       0.138000       0.234400   -9999.000000   -9999.000000
57385     57385     hubei          113.4897       31.3797          114       174     2012      10        12        286              0.206750      22.406281       0.052262       0.170962   -9999.000000   -9999.000000   -9999.000000       0.209000
57385     57385     hubei          113.4897       31.3797          114       174     2012      10        13        287              0.206333      21.733154       0.106111       0.172055       0.134000       0.220300       0.062000   -9999.000000
57385     57385     hubei          113.4897       31.3797          114       174     2012      10        14        288              0.206500      21.921448       0.911891       0.173240       0.140000       0.131100       0.078700       0.076000
57385     57385     hubei          113.4897       31.3797          114       174     2012      10        15        289              0.264708      22.847137      18.960083       0.172691       0.177000   -9999.000000       0.106500   -9999.000000
57385     57385     hubei          113.4897       31.3797          114       174     2012      10        16        290              0.312625      21.115784       0.411488       0.281563       0.174000       0.113600       0.101500       0.608000
57385     57385     hubei          113.4897       31.3797          114       174     2012      10        17        291              0.311292      18.357422       1.996337       0.284820   -9999.000000   -9999.000000   -9999.000000   -9999.000000
57385     57385     hubei          113.4897       31.3797          114       174     2012      10        18        292              0.308000      18.409149       0.000000       0.263217       0.141000   -9999.000000       0.099500   -9999.000000
57385     57385     hubei          113.4897       31.3797          114       174     2012      10        19        293              0.305000      19.799591       0.000000       0.251455       0.142000       0.354600       0.091700       0.185000
57385     57385     hubei          113.4897       31.3797          114       174     2012      10        20        294              0.301917      21.220093       0.000000       0.242981       0.138000   -9999.000000       0.095500   -9999.000000
57385     57385     hubei          113.4897       31.3797          114       174     2012      10        21        295              0.298958      22.473114      15.245191       0.236725       0.200000       0.159800       0.101300       0.738000
57385     57385     hubei          113.4897       31.3797          114       174     2012      10        22        296              0.292542      21.705139       0.000000       0.286550   -9999.000000       0.336800   -9999.000000   -9999.000000
57385     57385     hubei          113.4897       31.3797          114       174     2012      10        23        297              0.287000      16.226837       0.104451       0.293091   -9999.000000       0.207300   -9999.000000       0.476000
57385     57385     hubei          113.4897       31.3797          114       174     2012      10        24        298              0.282083      17.812836       0.156197       0.277399   -9999.000000       0.157700       0.067900       0.454000
57385     57385     hubei          113.4897       31.3797          114       174     2012      10        25        299              0.000000      16.814026       5.010115       0.273053       0.173000   -9999.000000       0.071400   -9999.000000
57385     57385     hubei          113.4897       31.3797          114       174     2012      10        26        300              0.309250      18.435028       8.673244       0.281372       0.220000       0.198200       0.092300       0.736000
57385     57385     hubei          113.4897       31.3797          114       174     2012      10        27        301              0.316958      16.595520       0.000000       0.322470       0.203000       0.238000       0.083900   -9999.000000
57385     57385     hubei          113.4897       31.3797          114       174     2012      10        28        302              0.000000      18.289307       3.767012       0.297248   -9999.000000       0.146000   -9999.000000       0.477000
57385     57385     hubei          113.4897       31.3797          114       174     2012      10        29        303              0.337500      19.289398      15.664366       0.292229       0.212000       0.233700   -9999.000000   -9999.000000
57385     57385     hubei          113.4897       31.3797          114       174     2012      10        30        304              0.328750      16.641266       1.509722       0.344237       0.186000   -9999.000000       0.092100   -9999.000000
57385     57385     hubei          113.4897       31.3797          114       174     2012      10        31        305              0.325375      15.757141       0.000000       0.315482       0.193000       0.260500       0.102800       0.487000
57385     57385     hubei          113.4897       31.3797          114       174     2012      11        01        306              0.322833      15.245026       0.000000       0.304673       0.180000       0.386100       0.114800   -9999.000000
57385     57385     hubei          113.4897       31.3797          114       174     2012      11        02        307              0.321208      14.745422       4.282326       0.299059       0.187000   -9999.000000   -9999.000000       0.338000
57385     57385     hubei          113.4897       31.3797          114       174     2012      11        03        308              0.327333      16.120728      11.353372       0.299201   -9999.000000       0.237400   -9999.000000   -9999.000000
57385     57385     hubei          113.4897       31.3797          114       174     2012      11        04        309              0.325565      11.897766       1.916888       0.338414   -9999.000000   -9999.000000       0.101100   -9999.000000
57385     57385     hubei          113.4897       31.3797          114       174     2012      11        05        310              0.323250      12.225433       4.152085       0.314547       0.190000   -9999.000000       0.098600       0.509000
57385     57385     hubei          113.4897       31.3797          114       174     2012      11        06        311              0.321667      11.881470       0.000000       0.306273       0.182000       0.285600       0.100200   -9999.000000
57385     57385     hubei          113.4897       31.3797          114       174     2012      11        07        312              0.320833      12.245911       0.936722       0.301000       0.196000   -9999.000000       0.111600       0.375000
57385     57385     hubei          113.4897       31.3797          114       174     2012      11        08        313              0.320542      12.770203       0.155969       0.301047   -9999.000000       0.214900   -9999.000000   -9999.000000
57385     57385     hubei          113.4897       31.3797          114       174     2012      11        09        314              0.319375      12.030396       0.175834       0.301589       0.200000       0.251500   -9999.000000   -9999.000000
57385     57385     hubei          113.4897       31.3797          114       174     2012      11        10        315              0.318333      11.600342       0.000000       0.299979       0.205000       0.160900       0.086800       0.494000
57385     57385     hubei          113.4897       31.3797          114       174     2012      11        11        316              0.316917      11.373016       0.000000       0.297679       0.164000       0.287800       0.100100   -9999.000000
57385     57385     hubei          113.4897       31.3797          114       174     2012      11        12        317              0.315708      11.218872       0.000000       0.292121       0.166000   -9999.000000       0.098200       0.126000
57385     57385     hubei          113.4897       31.3797          114       174     2012      11        13        318              0.000000      11.562561       0.000000       0.289887   -9999.000000       0.394100       0.098700   -9999.000000
57385     57385     hubei          113.4897       31.3797          114       174     2012      11        14        319              0.314708      13.464355       1.464313       0.287315       0.172000       0.372900   -9999.000000       0.332000
57385     57385     hubei          113.4897       31.3797          114       174     2012      11        15        320              0.313417      13.425690       5.876998       0.284780       0.191000       0.112200   -9999.000000   -9999.000000
57385     57385     hubei          113.4897       31.3797          114       174     2012      11        16        321              0.311875      10.741791       0.298048       0.303652       0.164000       0.234600       0.086900   -9999.000000
57385     57385     hubei          113.4897       31.3797          114       174     2012      11        17        322              0.000000      10.526276      15.664755       0.302730       0.184000   -9999.000000       0.091800       0.262000
57385     57385     hubei          113.4897       31.3797          114       174     2012      11        18        323              0.310375      11.369385       1.845152       0.295889       0.180000       0.313600       0.100800   -9999.000000
57385     57385     hubei          113.4897       31.3797          114       174     2012      11        19        324              0.309875      12.772522       1.002470       0.292186   -9999.000000       0.196300   -9999.000000       0.502000
57385     57385     hubei          113.4897       31.3797          114       174     2012      11        20        325              0.309458      13.164764       2.499622       0.293508       0.188000   -9999.000000   -9999.000000   -9999.000000
57385     57385     hubei          113.4897       31.3797          114       174     2012      11        21        326              0.308042      12.438324       0.000000       0.299781       0.167500       0.172200       0.073700       0.459000
57385     57385     hubei          113.4897       31.3797          114       174     2012      11        22        327              0.307458      11.493164       0.119532       0.298789       0.182500   -9999.000000       0.076300       0.450000
57385     57385     hubei          113.4897       31.3797          114       174     2012      11        23        328              0.305083      10.907532       0.000000       0.295293       0.174000       0.114400       0.079500   -9999.000000
57385     57385     hubei          113.4897       31.3797          114       174     2012      11        24        329              0.303833       8.145081       0.683188       0.291426   -9999.000000       0.226100       0.076900       0.348000
57385     57385     hubei          113.4897       31.3797          114       174     2012      11        25        330              0.302958       9.180573       2.921629       0.292225   -9999.000000   -9999.000000   -9999.000000   -9999.000000
57385     57385     hubei          113.4897       31.3797          114       174     2012      11        26        331              0.301083       7.273224       0.197264       0.307627       0.156000       0.205400   -9999.000000       0.178000
57385     57385     hubei          113.4897       31.3797          114       174     2012      11        27        332              0.299917       8.132874       0.000000       0.296062       0.166000       0.316300       0.065200   -9999.000000
57385     57385     hubei          113.4897       31.3797          114       174     2012      11        28        333              0.299500       9.279785       0.000000       0.292510       0.164000       0.245300       0.081000   -9999.000000
57385     57385     hubei          113.4897       31.3797          114       174     2012      11        29        334              0.298292       8.314789       1.579572       0.290512       0.178000       0.186700       0.086900       0.533000
57385     57385     hubei          113.4897       31.3797          114       174     2012      11        30        335              0.298000       9.139709       0.000000       0.295361   -9999.000000   -9999.000000       0.082800   -9999.000000
57385     57385     hubei          113.4897       31.3797          114       174     2012      12        01        336              0.296292       9.084167       1.574488       0.293360   -9999.000000       0.225800   -9999.000000       0.297000
57385     57385     hubei          113.4897       31.3797          114       174     2012      12        02        337              0.294375       5.395996       0.058857       0.299311   -9999.000000       0.187400       0.082900   -9999.000000
57385     57385     hubei          113.4897       31.3797          114       174     2012      12        03        338              0.293833       5.325012       0.440469       0.295016       0.154000       0.125600       0.085400   -9999.000000
57385     57385     hubei          113.4897       31.3797          114       174     2012      12        04        339              0.292417       6.905518       0.000000       0.291959       0.173000       0.128200       0.088100       0.333000
57385     57385     hubei          113.4897       31.3797          114       174     2012      12        05        340              0.291792       6.250854       0.000000       0.291085   -9999.000000   -9999.000000       0.095800   -9999.000000
57385     57385     hubei          113.4897       31.3797          114       174     2012      12        06        341              0.289833       7.746155       0.252058       0.287711   -9999.000000       0.282000   -9999.000000       0.163000
57385     57385     hubei          113.4897       31.3797          114       174     2012      12        07        342              0.288870       6.715698       0.012193       0.286888       0.156000       0.119900   -9999.000000   -9999.000000
57385     57385     hubei          113.4897       31.3797          114       174     2012      12        08        343              0.287125       7.892914       0.017151       0.284767       0.156000   -9999.000000       0.081900   -9999.000000
57385     57385     hubei          113.4897       31.3797          114       174     2012      12        09        344              0.285458       7.343658       1.806910       0.282347       0.153000       0.251300       0.092500       0.312000
57385     57385     hubei          113.4897       31.3797          114       174     2012      12        10        345              0.283833       6.179932       1.743494       0.285286   -9999.000000   -9999.000000       0.091100   -9999.000000
57385     57385     hubei          113.4897       31.3797          114       174     2012      12        11        346              0.282500       4.165253       0.184067       0.300456   -9999.000000   -9999.000000       0.089800       0.040000
57385     57385     hubei          113.4897       31.3797          114       174     2012      12        12        347              0.281000       5.107391       3.849144       0.290444       0.146000       0.190600   -9999.000000   -9999.000000
57385     57385     hubei          113.4897       31.3797          114       174     2012      12        13        348              0.304458       6.235382      16.034683       0.294337       0.189000   -9999.000000   -9999.000000       0.658000
57385     57385     hubei          113.4897       31.3797          114       174     2012      12        14        349              0.319667       5.225739       6.055241       0.347444   -9999.000000       0.287600       0.084800   -9999.000000
57385     57385     hubei          113.4897       31.3797          114       174     2012      12        15        350              0.000000       4.427032       0.000000       0.337714   -9999.000000       0.232200       0.104100   -9999.000000
57385     57385     hubei          113.4897       31.3797          114       174     2012      12        16        351              0.317083       5.186707       0.055350       0.325481   -9999.000000       0.231700       0.105100       0.411000
57385     57385     hubei          113.4897       31.3797          114       174     2012      12        17        352              0.322083       5.245697      19.598619       0.319113   -9999.000000       0.148800       0.088000   -9999.000000
57385     57385     hubei          113.4897       31.3797          114       174     2012      12        18        353              0.319750       5.128571       0.819533       0.340376   -9999.000000   -9999.000000   -9999.000000       0.319000
57385     57385     hubei          113.4897       31.3797          114       174     2012      12        19        354              0.318500       3.210693       3.202991       0.340298       0.170000       0.310400       0.127000   -9999.000000
57385     57385     hubei          113.4897       31.3797          114       174     2012      12        20        355              0.000000       4.472687       0.277600       0.336358   -9999.000000       0.157600       0.108400       0.311000
57385     57385     hubei          113.4897       31.3797          114       174     2012      12        21        356              0.318625       1.930542       1.240526       0.327653   -9999.000000   -9999.000000       0.107800       0.429000
57385     57385     hubei          113.4897       31.3797          114       174     2012      12        22        357              0.316583       3.712280       0.000000       0.325062   -9999.000000       0.161300       0.125000   -9999.000000
57385     57385     hubei          113.4897       31.3797          114       174     2012      12        23        358              0.315167       3.315247       0.000000       0.309983   -9999.000000   -9999.000000   -9999.000000       0.154000
57385     57385     hubei          113.4897       31.3797          114       174     2012      12        24        359              0.314263       2.555969       1.191327       0.295255       0.134000       0.058000   -9999.000000   -9999.000000
57385     57385     hubei          113.4897       31.3797          114       174     2012      12        25        360              0.313708       3.643250       0.339425       0.307458   -9999.000000       0.168400       0.080500       0.043000
57385     57385     hubei          113.4897       31.3797          114       174     2012      12        26        361              0.000000       1.510895       0.238969       0.291780   -9999.000000   -9999.000000       0.097500   -9999.000000
57385     57385     hubei          113.4897       31.3797          114       174     2012      12        27        362              0.313000       0.599396       1.605062       0.268004   -9999.000000       0.215000       0.103500   -9999.000000
57385     57385     hubei          113.4897       31.3797          114       174     2012      12        28        363              0.313000       0.918579       3.635367       0.282451   -9999.000000   -9999.000000       0.103400       0.622000
57385     57385     hubei          113.4897       31.3797          114       174     2012      12        29        364              0.000000       1.327728       5.944273       0.305634   -9999.000000   -9999.000000   -9999.000000   -9999.000000
57385     57385     hubei          113.4897       31.3797          114       174     2012      12        30        365              0.000000       0.933563       1.762710       0.288502   -9999.000000       0.162700   -9999.000000       0.031000
57385     57385     hubei          113.4897       31.3797          114       174     2012      12        31        366              0.316467       0.809387       2.558013       0.261469       0.132000   -9999.000000       0.096900   -9999.000000
