# Supplementary material for: Research on Fusing Multisatellite Soil Moisture Data Based on Bayesian Model Averaging
Source: Hindawi journal article supplement (doi:10.1155/2018/9310838), 2018-06-25
Supplement: f1 [file 9310838.f1.zip › 2012_sm00-10cm_daily_ZDB_ZHY_57388_366days_allin.txt]

57388     57388     hubei          113.4100       31.1597          115       174     2012      01        01        001              0.000000   -9999.000000       0.000000   -9999.000000       0.126000   -9999.000000       0.087300   -9999.000000
57388     57388     hubei          113.4100       31.1597          115       174     2012      01        02        002              0.000000       2.699341       0.000000       0.278572       0.126500       0.144100       0.097800   -9999.000000
57388     57388     hubei          113.4100       31.1597          115       174     2012      01        03        003              0.000000       3.504486       0.000000       0.296551   -9999.000000       0.098100   -9999.000000       0.159000
57388     57388     hubei          113.4100       31.1597          115       174     2012      01        04        004              0.000000       2.230560       0.000000       0.268625   -9999.000000   -9999.000000   -9999.000000   -9999.000000
57388     57388     hubei          113.4100       31.1597          115       174     2012      01        05        005              0.000000       2.342285       0.000000       0.257840   -9999.000000       0.170100       0.083700       0.025000
57388     57388     hubei          113.4100       31.1597          115       174     2012      01        06        006              0.000000       1.663483       0.000000       0.257128       0.127000   -9999.000000       0.089700   -9999.000000
57388     57388     hubei          113.4100       31.1597          115       174     2012      01        07        007              0.000000       3.356995       0.000000       0.271066       0.121000       0.105500       0.099400       0.109000
57388     57388     hubei          113.4100       31.1597          115       174     2012      01        08        008              0.000000       2.532196       0.000000       0.279773       0.123000   -9999.000000   -9999.000000       0.085000
57388     57388     hubei          113.4100       31.1597          115       174     2012      01        09        009              0.000000       3.740234       0.000000       0.286460   -9999.000000   -9999.000000   -9999.000000   -9999.000000
57388     57388     hubei          113.4100       31.1597          115       174     2012      01        10        010              0.000000       4.983276       0.000000       0.287318   -9999.000000       0.032600       0.065600       0.178000
57388     57388     hubei          113.4100       31.1597          115       174     2012      01        11        011              0.000000       4.140228       0.000000       0.286230   -9999.000000   -9999.000000       0.069400   -9999.000000
57388     57388     hubei          113.4100       31.1597          115       174     2012      01        12        012              0.000000       2.635193       0.000000       0.283213       0.159000       0.058200       0.069900       0.058000
57388     57388     hubei          113.4100       31.1597          115       174     2012      01        13        013              0.000000       2.786865       5.434344       0.282368       0.152000       0.129000       0.076000   -9999.000000
57388     57388     hubei          113.4100       31.1597          115       174     2012      01        14        014              0.000000       3.208313       3.142548       0.287691   -9999.000000   -9999.000000   -9999.000000   -9999.000000
57388     57388     hubei          113.4100       31.1597          115       174     2012      01        15        015              0.000000       1.733063       0.119949       0.308079   -9999.000000       0.296700   -9999.000000       0.313000
57388     57388     hubei          113.4100       31.1597          115       174     2012      01        16        016              0.000000       3.075348       0.000000       0.299086   -9999.000000       0.144500       0.054300   -9999.000000
57388     57388     hubei          113.4100       31.1597          115       174     2012      01        17        017              0.000000       4.129089       1.699985       0.296328       0.165000       0.309100       0.064400       0.481000
57388     57388     hubei          113.4100       31.1597          115       174     2012      01        18        018              0.000000       3.411407       0.000000       0.299766       0.157000       0.164000       0.066800   -9999.000000
57388     57388     hubei          113.4100       31.1597          115       174     2012      01        19        019              0.000000       3.666290       0.154420       0.296499       0.165000   -9999.000000       0.066700   -9999.000000
57388     57388     hubei          113.4100       31.1597          115       174     2012      01        20        020              0.000000       3.692108       2.272126       0.294759   -9999.000000       0.150000   -9999.000000       0.543000
57388     57388     hubei          113.4100       31.1597          115       174     2012      01        21        021              0.000000       3.252167       0.528685       0.298942   -9999.000000       0.077600   -9999.000000   -9999.000000
57388     57388     hubei          113.4100       31.1597          115       174     2012      01        22        022              0.000000       1.203979       1.249881       0.254991   -9999.000000   -9999.000000       0.046900       0.130000
57388     57388     hubei          113.4100       31.1597          115       174     2012      01        23        023              0.000000       0.380554       1.020865       0.221942       0.137000       0.195300       0.078300   -9999.000000
57388     57388     hubei          113.4100       31.1597          115       174     2012      01        24        024              0.000000       1.101166       0.000000       0.234929       0.141000   -9999.000000   -9999.000000   -9999.000000
57388     57388     hubei          113.4100       31.1597          115       174     2012      01        25        025              0.000000       1.963806       0.000000       0.244202   -9999.000000       0.181600   -9999.000000       0.109000
57388     57388     hubei          113.4100       31.1597          115       174     2012      01        26        026              0.000000       2.210297       0.000000       0.245578   -9999.000000       0.076900   -9999.000000   -9999.000000
57388     57388     hubei          113.4100       31.1597          115       174     2012      01        27        027              0.000000       3.058807       0.713450       0.262422   -9999.000000   -9999.000000       0.076900       0.023000
57388     57388     hubei          113.4100       31.1597          115       174     2012      01        28        028              0.000000       1.782501       0.169690       0.267983       0.135000       0.026500       0.081400   -9999.000000
57388     57388     hubei          113.4100       31.1597          115       174     2012      01        29        029              0.000000       4.693054       0.798242       0.282487   -9999.000000   -9999.000000       0.082900       0.306000
57388     57388     hubei          113.4100       31.1597          115       174     2012      01        30        030              0.000000       3.135559       0.000000       0.288324   -9999.000000       0.114800       0.097000   -9999.000000
57388     57388     hubei          113.4100       31.1597          115       174     2012      01        31        031              0.000000       4.071320       0.000000       0.279774   -9999.000000       0.093900   -9999.000000   -9999.000000
57388     57388     hubei          113.4100       31.1597          115       174     2012      02        01        032              0.000000       5.394775      11.886024       0.283485   -9999.000000   -9999.000000   -9999.000000       0.044000
57388     57388     hubei          113.4100       31.1597          115       174     2012      02        02        033              0.000000       2.627228       0.000000       0.275555       0.139000       0.029500       0.070900   -9999.000000
57388     57388     hubei          113.4100       31.1597          115       174     2012      02        03        034              0.000000       2.952209       0.000000       0.258148       0.133000       0.177000       0.091200       0.085000
57388     57388     hubei          113.4100       31.1597          115       174     2012      02        04        035              0.000000       3.757721       0.000000       0.265917       0.142000       0.118800       0.093800   -9999.000000
57388     57388     hubei          113.4100       31.1597          115       174     2012      02        05        036              0.000000       2.804535       0.809963       0.278112   -9999.000000       0.243600       0.102600       0.322000
57388     57388     hubei          113.4100       31.1597          115       174     2012      02        06        037              0.000000       5.032043       0.701044       0.285488   -9999.000000   -9999.000000   -9999.000000       0.110000
57388     57388     hubei          113.4100       31.1597          115       174     2012      02        07        038              0.000000       4.727844       0.200508       0.283952   -9999.000000       0.252300       0.078600   -9999.000000
57388     57388     hubei          113.4100       31.1597          115       174     2012      02        08        039              0.000000       3.601715       0.178404       0.263568   -9999.000000       0.367900       0.079400       0.017000
57388     57388     hubei          113.4100       31.1597          115       174     2012      02        09        040              0.000000       3.791656       0.000000       0.268596       0.148000   -9999.000000       0.080400   -9999.000000
57388     57388     hubei          113.4100       31.1597          115       174     2012      02        10        041              0.095214       1.911987       0.142229       0.261490   -9999.000000       0.099500       0.083900       0.070000
57388     57388     hubei          113.4100       31.1597          115       174     2012      02        11        042              0.095789       4.297760       0.000000       0.263591   -9999.000000   -9999.000000   -9999.000000   -9999.000000
57388     57388     hubei          113.4100       31.1597          115       174     2012      02        12        043              0.093700       5.265839       0.000000       0.274015       0.148000       0.116900   -9999.000000   -9999.000000
57388     57388     hubei          113.4100       31.1597          115       174     2012      02        13        044              0.092304       4.101135       0.000000       0.278029       0.144000       0.068600   -9999.000000       0.122000
57388     57388     hubei          113.4100       31.1597          115       174     2012      02        14        045              0.091000       3.555878       3.243243       0.278505       0.146000   -9999.000000       0.081500   -9999.000000
57388     57388     hubei          113.4100       31.1597          115       174     2012      02        15        046              0.091619       3.486938       0.570401       0.288883   -9999.000000   -9999.000000       0.084100       0.475000
57388     57388     hubei          113.4100       31.1597          115       174     2012      02        16        047              0.093208       3.375092       0.000000       0.290297   -9999.000000   -9999.000000       0.082200   -9999.000000
57388     57388     hubei          113.4100       31.1597          115       174     2012      02        17        048              0.094409       6.204651       0.000000       0.285048       0.120000       0.184500   -9999.000000   -9999.000000
57388     57388     hubei          113.4100       31.1597          115       174     2012      02        18        049              0.095909       5.517029       0.000000       0.276932       0.130000       0.254400   -9999.000000       0.199000
57388     57388     hubei          113.4100       31.1597          115       174     2012      02        19        050              0.096875       5.900116       0.000000       0.272790       0.121000   -9999.000000       0.062200   -9999.000000
57388     57388     hubei          113.4100       31.1597          115       174     2012      02        20        051              0.095545       6.741638       0.000000       0.275509       0.138000       0.117500       0.065600       0.099000
57388     57388     hubei          113.4100       31.1597          115       174     2012      02        21        052              0.096083       5.660980       0.000000       0.277958   -9999.000000   -9999.000000   -9999.000000   -9999.000000
57388     57388     hubei          113.4100       31.1597          115       174     2012      02        22        053              0.096125       8.348267       0.783449       0.278136       0.129000       0.101900       0.070700   -9999.000000
57388     57388     hubei          113.4100       31.1597          115       174     2012      02        23        054              0.094714       8.660950       1.725327       0.281787       0.135500       0.206200   -9999.000000       0.380000
57388     57388     hubei          113.4100       31.1597          115       174     2012      02        24        055              0.093800       6.087494       0.000000       0.285760       0.125000   -9999.000000       0.069600   -9999.000000
57388     57388     hubei          113.4100       31.1597          115       174     2012      02        25        056              0.092800       4.553955       0.000000       0.283365       0.119000       0.243700       0.060700       0.014000
57388     57388     hubei          113.4100       31.1597          115       174     2012      02        26        057              0.093364       4.222961       0.000000       0.280515   -9999.000000       0.274000       0.062300   -9999.000000
57388     57388     hubei          113.4100       31.1597          115       174     2012      02        27        058              0.094000       5.685638       0.338511       0.277478   -9999.000000       0.157400   -9999.000000       0.113000
57388     57388     hubei          113.4100       31.1597          115       174     2012      02        28        059              0.095333       5.911591       0.000000       0.276635       0.103000       0.134000   -9999.000000   -9999.000000
57388     57388     hubei          113.4100       31.1597          115       174     2012      02        29        060              0.000000   -9999.000000       0.000000   -9999.000000       0.119000   -9999.000000   -9999.000000   -9999.000000
57388     57388     hubei          113.4100       31.1597          115       174     2012      03        01        061              0.092261       7.709625       0.000000       0.274585       0.154000       0.159700       0.062200       0.108000
57388     57388     hubei          113.4100       31.1597          115       174     2012      03        02        062              0.091000       6.918549       0.692383       0.275087   -9999.000000       0.055600       0.066100   -9999.000000
57388     57388     hubei          113.4100       31.1597          115       174     2012      03        03        063              0.000000       6.107361       5.822977       0.277221   -9999.000000   -9999.000000       0.069600       0.118000
57388     57388     hubei          113.4100       31.1597          115       174     2012      03        04        064              0.000000       4.917725       0.061979       0.294678       0.182000       0.098600       0.079200   -9999.000000
57388     57388     hubei          113.4100       31.1597          115       174     2012      03        05        065              0.000000       3.538513       0.412796       0.294074       0.147000   -9999.000000   -9999.000000       0.068000
57388     57388     hubei          113.4100       31.1597          115       174     2012      03        06        066              0.094000       7.296661       0.341789       0.286177       0.154000       0.089100   -9999.000000       0.110000
57388     57388     hubei          113.4100       31.1597          115       174     2012      03        07        067              0.000000       7.712311       1.801007       0.282931   -9999.000000       0.136900       0.059200   -9999.000000
57388     57388     hubei          113.4100       31.1597          115       174     2012      03        08        068              0.000000       7.064606       0.376714       0.287283   -9999.000000   -9999.000000       0.066100       0.227000
57388     57388     hubei          113.4100       31.1597          115       174     2012      03        09        069              0.000000       6.072998       0.000000       0.286628       0.136000       0.092200       0.068400   -9999.000000
57388     57388     hubei          113.4100       31.1597          115       174     2012      03        10        070              0.000000       7.001526       0.000000       0.282315       0.140000   -9999.000000       0.062300       0.094000
57388     57388     hubei          113.4100       31.1597          115       174     2012      03        11        071              0.000000       9.762482       0.000000       0.278162       0.129000       0.297300   -9999.000000   -9999.000000
57388     57388     hubei          113.4100       31.1597          115       174     2012      03        12        072              0.099167       8.606293       0.000000       0.276024       0.136000       0.230300       0.061000   -9999.000000
57388     57388     hubei          113.4100       31.1597          115       174     2012      03        13        073              0.101000      10.186890       0.467506       0.273600   -9999.000000   -9999.000000       0.056800       0.002000
57388     57388     hubei          113.4100       31.1597          115       174     2012      03        14        074              0.101000      12.268768       0.959023       0.272682   -9999.000000       0.108500       0.065600   -9999.000000
57388     57388     hubei          113.4100       31.1597          115       174     2012      03        15        075              0.099000      13.611084       4.199136       0.271615       0.168500       0.115100       0.075100       0.333000
57388     57388     hubei          113.4100       31.1597          115       174     2012      03        16        076              0.097600       9.963654       0.579460       0.292754       0.151500   -9999.000000   -9999.000000   -9999.000000
57388     57388     hubei          113.4100       31.1597          115       174     2012      03        17        077              0.097556      10.116089       0.875408       0.286011       0.146000       0.235000   -9999.000000   -9999.000000
57388     57388     hubei          113.4100       31.1597          115       174     2012      03        18        078              0.099857      11.423065       2.805766       0.282639   -9999.000000   -9999.000000       0.062100       0.312000
57388     57388     hubei          113.4100       31.1597          115       174     2012      03        19        079              0.099769      14.472137       7.478016       0.280416       0.182000       0.221500       0.090200   -9999.000000
57388     57388     hubei          113.4100       31.1597          115       174     2012      03        20        080              0.100174       6.568176       1.984471       0.297265       0.163000       0.127900       0.091900       0.247000
57388     57388     hubei          113.4100       31.1597          115       174     2012      03        21        081              0.108833       7.501312      19.662731       0.298949       0.195500   -9999.000000       0.090100   -9999.000000
57388     57388     hubei          113.4100       31.1597          115       174     2012      03        22        082              0.140292       8.771423      13.360163       0.319069   -9999.000000       0.224300   -9999.000000   -9999.000000
57388     57388     hubei          113.4100       31.1597          115       174     2012      03        23        083              0.138375       7.401062       0.684767       0.339748   -9999.000000   -9999.000000   -9999.000000       0.430000
57388     57388     hubei          113.4100       31.1597          115       174     2012      03        24        084              0.137375      11.036530       0.000000       0.315900   -9999.000000       0.261700   -9999.000000   -9999.000000
57388     57388     hubei          113.4100       31.1597          115       174     2012      03        25        085              0.000000      13.684540       0.000000       0.303922       0.161000       0.215900       0.084800       0.128000
57388     57388     hubei          113.4100       31.1597          115       174     2012      03        26        086              0.138333      15.589172       0.208350       0.296729       0.158000   -9999.000000       0.108200   -9999.000000
57388     57388     hubei          113.4100       31.1597          115       174     2012      03        27        087              0.138458      17.022339       0.871800       0.290749       0.143000       0.194800   -9999.000000       0.219000
57388     57388     hubei          113.4100       31.1597          115       174     2012      03        28        088              0.137917      17.997711       0.212298       0.288736       0.154000   -9999.000000   -9999.000000   -9999.000000
57388     57388     hubei          113.4100       31.1597          115       174     2012      03        29        089              0.135500      18.741425       1.239085       0.284279   -9999.000000       0.333500       0.099200   -9999.000000
57388     57388     hubei          113.4100       31.1597          115       174     2012      03        30        090              0.133208      17.171082       0.398663       0.287170   -9999.000000       0.300000       0.096200       0.098000
57388     57388     hubei          113.4100       31.1597          115       174     2012      03        31        091              0.135208      14.611237       0.000000       0.289400       0.149000   -9999.000000       0.097500   -9999.000000
57388     57388     hubei          113.4100       31.1597          115       174     2012      04        01        092              0.134833      17.504639       0.000000       0.279211       0.176000       0.027500       0.100000       0.107000
57388     57388     hubei          113.4100       31.1597          115       174     2012      04        02        093              0.133583      18.933411       0.000000       0.272644       0.170000       0.308200   -9999.000000   -9999.000000
57388     57388     hubei          113.4100       31.1597          115       174     2012      04        03        094              0.136125      18.143677       0.000000       0.268116   -9999.000000       0.235000   -9999.000000       0.160000
57388     57388     hubei          113.4100       31.1597          115       174     2012      04        04        095              0.131750      17.152069       0.188263       0.265204       0.184000   -9999.000000       0.077100       0.245000
57388     57388     hubei          113.4100       31.1597          115       174     2012      04        05        096              0.129292      14.497375       0.000000       0.267926       0.173000   -9999.000000       0.080900   -9999.000000
57388     57388     hubei          113.4100       31.1597          115       174     2012      04        06        097              0.128542      17.183868       0.000000       0.266234       0.164500       0.292300       0.080400       0.138000
57388     57388     hubei          113.4100       31.1597          115       174     2012      04        07        098              0.125750      19.152618       0.000000       0.261461       0.148000       0.222600       0.078800   -9999.000000
57388     57388     hubei          113.4100       31.1597          115       174     2012      04        08        099              0.119167      20.052673       0.125492       0.255865   -9999.000000   -9999.000000   -9999.000000       0.223000
57388     57388     hubei          113.4100       31.1597          115       174     2012      04        09        100              0.115708      18.929230       4.592972       0.256369       0.192000       0.098400   -9999.000000   -9999.000000
57388     57388     hubei          113.4100       31.1597          115       174     2012      04        10        101              0.115625      17.380310       0.235900       0.284537       0.185000   -9999.000000       0.074300   -9999.000000
57388     57388     hubei          113.4100       31.1597          115       174     2012      04        11        102              0.115333      18.637909       0.000000       0.274930       0.190500       0.053200       0.078400       0.175000
57388     57388     hubei          113.4100       31.1597          115       174     2012      04        12        103              0.113125      20.708038       7.594275       0.269475   -9999.000000   -9999.000000       0.098700   -9999.000000
57388     57388     hubei          113.4100       31.1597          115       174     2012      04        13        104              0.113583      14.693451       0.126958       0.296409   -9999.000000   -9999.000000   -9999.000000       0.218000
57388     57388     hubei          113.4100       31.1597          115       174     2012      04        14        105              0.114000      17.109528       0.044662       0.281964       0.216000       0.078900   -9999.000000   -9999.000000
57388     57388     hubei          113.4100       31.1597          115       174     2012      04        15        106              0.114583      14.331543       0.000000       0.279616       0.186000   -9999.000000       0.073500   -9999.000000
57388     57388     hubei          113.4100       31.1597          115       174     2012      04        16        107              0.113792      15.777649       0.000000       0.275739       0.186000       0.131500       0.094200       0.315000
57388     57388     hubei          113.4100       31.1597          115       174     2012      04        17        108              0.112833      19.177429       0.209824       0.270862       0.197500       0.121200       0.098400   -9999.000000
57388     57388     hubei          113.4100       31.1597          115       174     2012      04        18        109              0.111917      18.794464       0.020486       0.270035       0.183000   -9999.000000   -9999.000000       0.156000
57388     57388     hubei          113.4100       31.1597          115       174     2012      04        19        110              0.113667      19.774780       0.000000       0.266444   -9999.000000   -9999.000000   -9999.000000   -9999.000000
57388     57388     hubei          113.4100       31.1597          115       174     2012      04        20        111              0.111208      22.394836       0.086371       0.260008       0.224000       0.071100   -9999.000000   -9999.000000
57388     57388     hubei          113.4100       31.1597          115       174     2012      04        21        112              0.111958      19.080536       0.000000       0.260354       0.230500       0.052000       0.088800       0.218000
57388     57388     hubei          113.4100       31.1597          115       174     2012      04        22        113              0.112292      21.521912      11.877808       0.254476       0.231500   -9999.000000       0.093100   -9999.000000
57388     57388     hubei          113.4100       31.1597          115       174     2012      04        23        114              0.109917      23.617676       0.765991       0.279561       0.216000   -9999.000000       0.148700       0.603000
57388     57388     hubei          113.4100       31.1597          115       174     2012      04        24        115              0.150125      23.416016      11.718946       0.284197   -9999.000000       0.345500       0.179400   -9999.000000
57388     57388     hubei          113.4100       31.1597          115       174     2012      04        25        116              0.000000      20.173370       0.109473       0.311925       0.295000       0.314400   -9999.000000       0.386000
57388     57388     hubei          113.4100       31.1597          115       174     2012      04        26        117              0.157458      18.876678       0.000000       0.290633       0.249500   -9999.000000   -9999.000000   -9999.000000
57388     57388     hubei          113.4100       31.1597          115       174     2012      04        27        118              0.157958      20.747375       0.000000       0.277927       0.232500       0.339500   -9999.000000   -9999.000000
57388     57388     hubei          113.4100       31.1597          115       174     2012      04        28        119              0.156125      23.184174       6.278125       0.269256       0.215000   -9999.000000       0.144800       0.656000
57388     57388     hubei          113.4100       31.1597          115       174     2012      04        29        120              0.153792      23.206146       5.730494       0.287314   -9999.000000       0.139500       0.151200   -9999.000000
57388     57388     hubei          113.4100       31.1597          115       174     2012      04        30        121              0.160625      23.092468      12.683619       0.297641       0.334000       0.118500   -9999.000000       0.762000
57388     57388     hubei          113.4100       31.1597          115       174     2012      05        01        122              0.162708      21.055237       0.128331       0.320208       0.302500   -9999.000000   -9999.000000   -9999.000000
57388     57388     hubei          113.4100       31.1597          115       174     2012      05        02        123              0.161042      20.753082       1.176014       0.301126       0.280500       0.165600       0.144100       0.356000
57388     57388     hubei          113.4100       31.1597          115       174     2012      05        03        124              0.160375      22.655457       0.389957       0.293690       0.269000   -9999.000000       0.153500       0.606000
57388     57388     hubei          113.4100       31.1597          115       174     2012      05        04        125              0.159792      22.340424       0.000000       0.290860   -9999.000000       0.221100       0.149400   -9999.000000
57388     57388     hubei          113.4100       31.1597          115       174     2012      05        05        126              0.159417      23.256409       0.000000       0.284609       0.252000   -9999.000000       0.138500       0.389000
57388     57388     hubei          113.4100       31.1597          115       174     2012      05        06        127              0.155250      25.357208       0.000000       0.275870       0.227500   -9999.000000   -9999.000000   -9999.000000
57388     57388     hubei          113.4100       31.1597          115       174     2012      05        07        128              0.170792      26.674500      19.039234       0.267727   -9999.000000       0.188900   -9999.000000       0.773000
57388     57388     hubei          113.4100       31.1597          115       174     2012      05        08        129              0.186542      24.571289       0.401838       0.330534       0.286500       0.262000       0.200600   -9999.000000
57388     57388     hubei          113.4100       31.1597          115       174     2012      05        09        130              0.192083      26.154663       4.395572       0.301080       0.315000       0.283000       0.219300   -9999.000000
57388     57388     hubei          113.4100       31.1597          115       174     2012      05        10        131              0.191583      24.113739       0.269538       0.305408   -9999.000000   -9999.000000       0.229700       0.527000
57388     57388     hubei          113.4100       31.1597          115       174     2012      05        11        132              0.184708      26.076233       0.636629       0.290280       0.329000   -9999.000000       0.229900   -9999.000000
57388     57388     hubei          113.4100       31.1597          115       174     2012      05        12        133              0.180750      27.013977       9.412533       0.282118       0.377500       0.252600   -9999.000000       0.614000
57388     57388     hubei          113.4100       31.1597          115       174     2012      05        13        134              0.200125      20.775574      18.454510       0.311979       0.272000   -9999.000000       0.225600   -9999.000000
57388     57388     hubei          113.4100       31.1597          115       174     2012      05        14        135              0.218708      22.516113       0.793809       0.323963       0.342000   -9999.000000       0.237300   -9999.000000
57388     57388     hubei          113.4100       31.1597          115       174     2012      05        15        136              0.214667      20.863403       0.000000       0.318419   -9999.000000       0.311400       0.209200       0.455000
57388     57388     hubei          113.4100       31.1597          115       174     2012      05        16        137              0.215292      22.870911       0.000000       0.302773       0.356000   -9999.000000       0.243000   -9999.000000
57388     57388     hubei          113.4100       31.1597          115       174     2012      05        17        138              0.213292      24.594574       0.000000       0.292425       0.290000       0.192800   -9999.000000       0.256000
57388     57388     hubei          113.4100       31.1597          115       174     2012      05        18        139              0.203958      25.991577       0.832433       0.283411       0.410000       0.275000   -9999.000000   -9999.000000
57388     57388     hubei          113.4100       31.1597          115       174     2012      05        19        140              0.193958      23.902771       0.000000       0.284410       0.277000   -9999.000000       0.204000   -9999.000000
57388     57388     hubei          113.4100       31.1597          115       174     2012      05        20        141              0.176792      24.509949       0.000000       0.277509   -9999.000000       0.116400       0.240500       0.326000
57388     57388     hubei          113.4100       31.1597          115       174     2012      05        21        142              0.162417      25.183167       0.000000       0.268183       0.340000   -9999.000000       0.229200   -9999.000000
57388     57388     hubei          113.4100       31.1597          115       174     2012      05        22        143              0.150625      24.848297       2.804600       0.264646       0.361000       0.195600       0.216300       0.702000
57388     57388     hubei          113.4100       31.1597          115       174     2012      05        23        144              0.146750      23.509796       1.235882       0.274900   -9999.000000       0.439300   -9999.000000   -9999.000000
57388     57388     hubei          113.4100       31.1597          115       174     2012      05        24        145              0.145958      23.110229       4.239135       0.279351   -9999.000000   -9999.000000   -9999.000000       0.559000
57388     57388     hubei          113.4100       31.1597          115       174     2012      05        25        146              0.000000      21.616547       0.553875       0.291203   -9999.000000       0.454100       0.209200   -9999.000000
57388     57388     hubei          113.4100       31.1597          115       174     2012      05        26        147              0.140042      21.206665       0.000000       0.285033       0.404000       0.286700       0.248900   -9999.000000
57388     57388     hubei          113.4100       31.1597          115       174     2012      05        27        148              0.132917      24.960663       0.133123       0.273977       0.385000       0.411000       0.224400       0.253000
57388     57388     hubei          113.4100       31.1597          115       174     2012      05        28        149              0.128375      25.951874       1.262860       0.266847       0.338500       0.310000       0.211900   -9999.000000
57388     57388     hubei          113.4100       31.1597          115       174     2012      05        29        150              0.243750      27.586029      44.525471       0.264477   -9999.000000   -9999.000000   -9999.000000       0.733000
57388     57388     hubei          113.4100       31.1597          115       174     2012      05        30        151              0.252542      21.748779       0.000000       0.353499       0.419000   -9999.000000       0.240800   -9999.000000
57388     57388     hubei          113.4100       31.1597          115       174     2012      05        31        152              0.239875      24.971863       0.000000       0.314919   -9999.000000   -9999.000000   -9999.000000   -9999.000000
57388     57388     hubei          113.4100       31.1597          115       174     2012      06        01        153              0.232875      24.940826       1.152094       0.302237       0.414000   -9999.000000       0.251700       0.575000
57388     57388     hubei          113.4100       31.1597          115       174     2012      06        02        154              0.225667      22.748657       0.000000       0.303169       0.357500       0.354700       0.295600   -9999.000000
57388     57388     hubei          113.4100       31.1597          115       174     2012      06        03        155              0.214542      24.972565       0.245928       0.294112       0.384500   -9999.000000   -9999.000000       0.415000
57388     57388     hubei          113.4100       31.1597          115       174     2012      06        04        156              0.207542      24.976074       0.116818       0.289907       0.349000       0.211100   -9999.000000   -9999.000000
57388     57388     hubei          113.4100       31.1597          115       174     2012      06        05        157              0.205333      26.032959       6.009328       0.284162   -9999.000000       0.356200       0.274200       0.778000
57388     57388     hubei          113.4100       31.1597          115       174     2012      06        06        158              0.230917      25.964111       0.839431       0.294744       0.385000   -9999.000000       0.253700   -9999.000000
57388     57388     hubei          113.4100       31.1597          115       174     2012      06        07        159              0.235625      25.436554       0.218822       0.299400       0.350000       0.149800       0.298200   -9999.000000
57388     57388     hubei          113.4100       31.1597          115       174     2012      06        08        160              0.236708      27.851105       0.000000       0.287255       0.349000   -9999.000000       0.302900       0.773000
57388     57388     hubei          113.4100       31.1597          115       174     2012      06        09        161              0.240708      29.520630       0.167727       0.277648       0.308000   -9999.000000   -9999.000000   -9999.000000
57388     57388     hubei          113.4100       31.1597          115       174     2012      06        10        162              0.241750      30.583038       0.563336       0.269463   -9999.000000       0.227900   -9999.000000       0.514000
57388     57388     hubei          113.4100       31.1597          115       174     2012      06        11        163              0.000000      28.579224       1.459084       0.263752       0.309000   -9999.000000       0.196900   -9999.000000
57388     57388     hubei          113.4100       31.1597          115       174     2012      06        12        164              0.240083      27.555695       0.000000       0.259064       0.282000       0.098900       0.224200   -9999.000000
57388     57388     hubei          113.4100       31.1597          115       174     2012      06        13        165              0.242167      29.012939       0.000000       0.248683       0.307000       0.047200       0.242400       0.599000
57388     57388     hubei          113.4100       31.1597          115       174     2012      06        14        166              0.240375      29.649994       0.460160       0.239745       0.278000       0.171900       0.235000   -9999.000000
57388     57388     hubei          113.4100       31.1597          115       174     2012      06        15        167              0.240250      28.833374       0.000000       0.239837       0.256000       0.373900   -9999.000000       0.518000
57388     57388     hubei          113.4100       31.1597          115       174     2012      06        16        168              0.237542      28.988525       0.000000       0.228037   -9999.000000   -9999.000000       0.201600   -9999.000000
57388     57388     hubei          113.4100       31.1597          115       174     2012      06        17        169              0.223875      29.075104       0.262844       0.219582       0.295000   -9999.000000       0.194700       0.396000
57388     57388     hubei          113.4100       31.1597          115       174     2012      06        18        170              0.206917      27.372253       0.444955       0.216933       0.256000       0.402200       0.202100       0.454000
57388     57388     hubei          113.4100       31.1597          115       174     2012      06        19        171              0.195208      29.473541       0.000000       0.210832       0.265000       0.038700       0.197000   -9999.000000
57388     57388     hubei          113.4100       31.1597          115       174     2012      06        20        172              0.189042      30.699554       0.381548       0.201992       0.255000       0.256600   -9999.000000       0.159000
57388     57388     hubei          113.4100       31.1597          115       174     2012      06        21        173              0.186042      30.901428       0.694217       0.198536   -9999.000000   -9999.000000   -9999.000000   -9999.000000
57388     57388     hubei          113.4100       31.1597          115       174     2012      06        22        174              0.185458      31.259125       0.000000       0.193360       0.280000       0.282200       0.174900       0.515000
57388     57388     hubei          113.4100       31.1597          115       174     2012      06        23        175              0.181375      31.735046       0.000000       0.186809       0.252500       0.192300       0.192200   -9999.000000
57388     57388     hubei          113.4100       31.1597          115       174     2012      06        24        176              0.176958      32.225677       0.110091       0.181118       0.251000   -9999.000000       0.189800   -9999.000000
57388     57388     hubei          113.4100       31.1597          115       174     2012      06        25        177              0.169917      33.036133       0.304221       0.174871       0.241000       0.091200       0.111200       0.184000
57388     57388     hubei          113.4100       31.1597          115       174     2012      06        26        178              0.189875      31.265442      21.787085       0.175003   -9999.000000   -9999.000000   -9999.000000   -9999.000000
57388     57388     hubei          113.4100       31.1597          115       174     2012      06        27        179              0.268208      28.557465      45.044136       0.272486       0.374000   -9999.000000   -9999.000000       0.924000
57388     57388     hubei          113.4100       31.1597          115       174     2012      06        28        180              0.294583      25.854126      21.077774       0.355128       0.329000       0.322700       0.126600   -9999.000000
57388     57388     hubei          113.4100       31.1597          115       174     2012      06        29        181              0.270458      26.317413       0.310007       0.351053       0.321000   -9999.000000       0.128200       0.987000
57388     57388     hubei          113.4100       31.1597          115       174     2012      06        30        182              0.273000      29.604370       0.057306       0.320063       0.302000       0.187900       0.137400   -9999.000000
57388     57388     hubei          113.4100       31.1597          115       174     2012      07        01        183              0.274045      27.133423       0.000000       0.309711   -9999.000000       0.238700   -9999.000000   -9999.000000
57388     57388     hubei          113.4100       31.1597          115       174     2012      07        02        184              0.276583      27.885193       0.000000       0.303528       0.307000       0.136700   -9999.000000       0.581000
57388     57388     hubei          113.4100       31.1597          115       174     2012      07        03        185              0.293208      30.668427       0.241943       0.292796       0.275000       0.591300       0.195500   -9999.000000
57388     57388     hubei          113.4100       31.1597          115       174     2012      07        04        186              0.293375      31.366486       0.338096       0.284452       0.285500   -9999.000000       0.186300       0.427000
57388     57388     hubei          113.4100       31.1597          115       174     2012      07        05        187              0.288167      30.630463      10.802976       0.277633   -9999.000000       0.189000       0.208200   -9999.000000
57388     57388     hubei          113.4100       31.1597          115       174     2012      07        06        188              0.286958      28.683868       0.000000       0.296263   -9999.000000       0.296000       0.192900   -9999.000000
57388     57388     hubei          113.4100       31.1597          115       174     2012      07        07        189              0.284042      30.564270       0.000000       0.302445   -9999.000000       0.065300   -9999.000000       0.545000
57388     57388     hubei          113.4100       31.1597          115       174     2012      07        08        190              0.277917      31.489960       0.000000       0.285577       0.291000       0.477000   -9999.000000   -9999.000000
57388     57388     hubei          113.4100       31.1597          115       174     2012      07        09        191              0.266750      31.878754       0.000000       0.274155       0.277500   -9999.000000       0.098400       0.384000
57388     57388     hubei          113.4100       31.1597          115       174     2012      07        10        192              0.275625      31.945496      29.761215       0.264423       0.279000       0.306600       0.117400   -9999.000000
57388     57388     hubei          113.4100       31.1597          115       174     2012      07        11        193              0.287208      30.361145       2.421948       0.333294       0.284000       0.251200       0.112200   -9999.000000
57388     57388     hubei          113.4100       31.1597          115       174     2012      07        12        194              0.347000      30.970062      11.890441       0.313124   -9999.000000   -9999.000000       0.119300       0.703000
57388     57388     hubei          113.4100       31.1597          115       174     2012      07        13        195              0.337130      28.619263      11.044195       0.328607       0.413000       0.143000   -9999.000000   -9999.000000
57388     57388     hubei          113.4100       31.1597          115       174     2012      07        14        196              0.307917      27.487061       0.234600       0.331383       0.366500   -9999.000000   -9999.000000       0.630000
57388     57388     hubei          113.4100       31.1597          115       174     2012      07        15        197              0.300250      29.178070       0.284975       0.311109       0.335500   -9999.000000       0.105700   -9999.000000
57388     57388     hubei          113.4100       31.1597          115       174     2012      07        16        198              0.301000      28.661835       0.000000       0.301675       0.301000       0.222700       0.155500       0.481000
57388     57388     hubei          113.4100       31.1597          115       174     2012      07        17        199              0.300667      29.574036       0.000000       0.292507   -9999.000000   -9999.000000       0.154100       0.491000
57388     57388     hubei          113.4100       31.1597          115       174     2012      07        18        200              0.299583      29.808533       0.000000       0.284646       0.349000       0.122100   -9999.000000   -9999.000000
57388     57388     hubei          113.4100       31.1597          115       174     2012      07        19        201              0.297000      29.979736       0.304850       0.277527       0.382000       0.180300   -9999.000000       0.369000
57388     57388     hubei          113.4100       31.1597          115       174     2012      07        20        202              0.293125      30.254822       0.375974       0.272332       0.330000       0.221000       0.143500   -9999.000000
57388     57388     hubei          113.4100       31.1597          115       174     2012      07        21        203              0.285783      30.711517       0.000000       0.270694       0.359000       0.541600       0.144700       0.422000
57388     57388     hubei          113.4100       31.1597          115       174     2012      07        22        204              0.270583      32.151093       8.924380       0.262331       0.325000   -9999.000000       0.153600   -9999.000000
57388     57388     hubei          113.4100       31.1597          115       174     2012      07        23        205              0.252792      31.911926       0.883328       0.256472   -9999.000000       0.168100       0.162500   -9999.000000
57388     57388     hubei          113.4100       31.1597          115       174     2012      07        24        206              0.240542      32.208221       0.364801       0.255208       0.375000       0.117800   -9999.000000       0.054000
57388     57388     hubei          113.4100       31.1597          115       174     2012      07        25        207              0.222417      32.556030       0.000000       0.247863       0.344500       0.103200   -9999.000000   -9999.000000
57388     57388     hubei          113.4100       31.1597          115       174     2012      07        26        208              0.201917      32.980652       0.000000       0.238086       0.359500       0.402700       0.143700       0.418000
57388     57388     hubei          113.4100       31.1597          115       174     2012      07        27        209              0.181500      33.205292       0.352146       0.228372       0.309000   -9999.000000       0.162400   -9999.000000
57388     57388     hubei          113.4100       31.1597          115       174     2012      07        28        210              0.165917      32.984039       0.269856       0.223835   -9999.000000       0.245900       0.161900       0.453000
57388     57388     hubei          113.4100       31.1597          115       174     2012      07        29        211              0.151833      33.335297       0.000000       0.218332       0.338000       0.225900       0.157300       0.155000
57388     57388     hubei          113.4100       31.1597          115       174     2012      07        30        212              0.138917      33.764557       0.000000       0.209619       0.316000   -9999.000000   -9999.000000   -9999.000000
57388     57388     hubei          113.4100       31.1597          115       174     2012      07        31        213              0.127625      34.225281       4.322638       0.202482       0.338000       0.104500       0.192000       0.345000
57388     57388     hubei          113.4100       31.1597          115       174     2012      08        01        214              0.117250      34.784088       0.226955       0.210275       0.330500   -9999.000000       0.186400   -9999.000000
57388     57388     hubei          113.4100       31.1597          115       174     2012      08        02        215              0.109208      32.505035       0.000000       0.231063       0.314000       0.273300       0.190800       0.229000
57388     57388     hubei          113.4100       31.1597          115       174     2012      08        03        216              0.102708      31.380463       0.000000       0.213073   -9999.000000       0.147600       0.192200   -9999.000000
57388     57388     hubei          113.4100       31.1597          115       174     2012      08        04        217              0.096250      32.098755       0.853276       0.199761       0.373000   -9999.000000   -9999.000000   -9999.000000
57388     57388     hubei          113.4100       31.1597          115       174     2012      08        05        218              0.093208      29.778656       3.347485       0.201836       0.347500       0.154800   -9999.000000       0.567000
57388     57388     hubei          113.4100       31.1597          115       174     2012      08        06        219              0.090333      31.044250       0.000000       0.226905       0.331500       0.104000       0.115800   -9999.000000
57388     57388     hubei          113.4100       31.1597          115       174     2012      08        07        220              0.161875      31.656311       0.000000       0.214265       0.300000   -9999.000000       0.115000       0.310000
57388     57388     hubei          113.4100       31.1597          115       174     2012      08        08        221              0.214250      32.138306       0.000000       0.198752   -9999.000000       0.343800       0.118300   -9999.000000
57388     57388     hubei          113.4100       31.1597          115       174     2012      08        09        222              0.214000      32.278656       0.088948       0.188638       0.363000   -9999.000000       0.119200   -9999.000000
57388     57388     hubei          113.4100       31.1597          115       174     2012      08        10        223              0.213125      32.290680       0.284607       0.181390       0.354500       0.135000   -9999.000000       0.381000
57388     57388     hubei          113.4100       31.1597          115       174     2012      08        11        224              0.213083      30.057587       0.189733       0.181529       0.292500       0.254300   -9999.000000   -9999.000000
57388     57388     hubei          113.4100       31.1597          115       174     2012      08        12        225              0.213208      30.570282       0.000000       0.182823       0.250000       0.040500       0.107800       0.306000
57388     57388     hubei          113.4100       31.1597          115       174     2012      08        13        226              0.213000      33.689178       1.804985       0.175839   -9999.000000       0.514100       0.132600   -9999.000000
57388     57388     hubei          113.4100       31.1597          115       174     2012      08        14        227              0.213000      30.801392       1.600626       0.176223   -9999.000000   -9999.000000       0.128300       0.351000
57388     57388     hubei          113.4100       31.1597          115       174     2012      08        15        228              0.213000      29.218170       0.000000       0.211179       0.306000       0.425000       0.121100       0.488000
57388     57388     hubei          113.4100       31.1597          115       174     2012      08        16        229              0.212708      30.472534       0.000000       0.194775       0.282000       0.304300   -9999.000000   -9999.000000
57388     57388     hubei          113.4100       31.1597          115       174     2012      08        17        230              0.212500      31.028595       0.000000       0.180995       0.277500   -9999.000000       0.123100       0.202000
57388     57388     hubei          113.4100       31.1597          115       174     2012      08        18        231              0.212208      33.833862       1.388658       0.172123   -9999.000000       0.424400       0.119400   -9999.000000
57388     57388     hubei          113.4100       31.1597          115       174     2012      08        19        232              0.212000      32.768097       1.543631       0.182804   -9999.000000   -9999.000000       0.123000       0.388000
57388     57388     hubei          113.4100       31.1597          115       174     2012      08        20        233              0.212667      32.112823      35.506954       0.185413   -9999.000000       0.218700       0.118600   -9999.000000
57388     57388     hubei          113.4100       31.1597          115       174     2012      08        21        234              0.223500      30.957672       4.665915       0.279086       0.338500       0.246100   -9999.000000   -9999.000000
57388     57388     hubei          113.4100       31.1597          115       174     2012      08        22        235              0.224000      25.615387       0.000000       0.315761       0.308000   -9999.000000   -9999.000000   -9999.000000
57388     57388     hubei          113.4100       31.1597          115       174     2012      08        23        236              0.223500      24.299316       0.000000       0.288843       0.276000       0.270000       0.122100   -9999.000000
57388     57388     hubei          113.4100       31.1597          115       174     2012      08        24        237              0.222875      25.301331       0.000000       0.274965   -9999.000000   -9999.000000       0.127800       0.467000
57388     57388     hubei          113.4100       31.1597          115       174     2012      08        25        238              0.000000      27.018707       0.000000       0.263887   -9999.000000       0.200700       0.122700   -9999.000000
57388     57388     hubei          113.4100       31.1597          115       174     2012      08        26        239              0.220583      28.687653       2.397685       0.255045       0.350000       0.123100       0.128200       0.586000
57388     57388     hubei          113.4100       31.1597          115       174     2012      08        27        240              0.219458      26.402832       3.911495       0.266731       0.307000   -9999.000000   -9999.000000       0.149000
57388     57388     hubei          113.4100       31.1597          115       174     2012      08        28        241              0.219000      26.657806       2.475568       0.261490       0.296500       0.066100   -9999.000000   -9999.000000
57388     57388     hubei          113.4100       31.1597          115       174     2012      08        29        242              0.219000      28.741241       0.000000       0.251307       0.278000       0.322000       0.098100       0.381000
57388     57388     hubei          113.4100       31.1597          115       174     2012      08        30        243              0.217583      30.064209       0.000000       0.241163   -9999.000000       0.054300       0.110800   -9999.000000
57388     57388     hubei          113.4100       31.1597          115       174     2012      08        31        244              0.216000      29.808105       1.224166       0.234583       0.300000       0.405500       0.109000       0.375000
57388     57388     hubei          113.4100       31.1597          115       174     2012      09        01        245              0.215000      30.673248       0.192774       0.227833       0.254000   -9999.000000   -9999.000000   -9999.000000
57388     57388     hubei          113.4100       31.1597          115       174     2012      09        02        246              0.214000      31.340393       0.399276       0.218475       0.266000       0.311200   -9999.000000   -9999.000000
57388     57388     hubei          113.4100       31.1597          115       174     2012      09        03        247              0.213667      26.265656       0.000000       0.218789       0.245000       0.157900       0.113800       0.381000
57388     57388     hubei          113.4100       31.1597          115       174     2012      09        04        248              0.213208      27.712128       0.391286       0.210206   -9999.000000   -9999.000000       0.112100   -9999.000000
57388     57388     hubei          113.4100       31.1597          115       174     2012      09        05        249              0.213000      27.975677       0.000000       0.200888       0.272000       0.377700       0.114400       0.284000
57388     57388     hubei          113.4100       31.1597          115       174     2012      09        06        250              0.212792      28.216400       2.717886       0.190925       0.261000   -9999.000000       0.112300   -9999.000000
57388     57388     hubei          113.4100       31.1597          115       174     2012      09        07        251              0.212208      27.977203       1.849009       0.197912       0.247000       0.187200   -9999.000000   -9999.000000
57388     57388     hubei          113.4100       31.1597          115       174     2012      09        08        252              0.221708      28.653137      43.524361       0.219385   -9999.000000       0.078100   -9999.000000       0.875000
57388     57388     hubei          113.4100       31.1597          115       174     2012      09        09        253              0.229542      24.276093       0.040677       0.380444       0.297000   -9999.000000       0.117900   -9999.000000
57388     57388     hubei          113.4100       31.1597          115       174     2012      09        10        254              0.229000      24.821594       0.880780       0.310017   -9999.000000       0.239700       0.146500       0.563000
57388     57388     hubei          113.4100       31.1597          115       174     2012      09        11        255              0.228208      25.860535       1.139941       0.295040   -9999.000000   -9999.000000       0.167400   -9999.000000
57388     57388     hubei          113.4100       31.1597          115       174     2012      09        12        256              0.227875      25.316650       4.436965       0.290323       0.253000       0.230100       0.147700   -9999.000000
57388     57388     hubei          113.4100       31.1597          115       174     2012      09        13        257              0.228000      22.885101       0.000000       0.300558       0.230000       0.188700   -9999.000000       0.380000
57388     57388     hubei          113.4100       31.1597          115       174     2012      09        14        258              0.226708      21.736389       0.000000       0.287554       0.211000   -9999.000000   -9999.000000   -9999.000000
57388     57388     hubei          113.4100       31.1597          115       174     2012      09        15        259              0.224000      22.887390       0.000000       0.276800   -9999.000000       0.052100       0.133200       0.307000
57388     57388     hubei          113.4100       31.1597          115       174     2012      09        16        260              0.221458      23.188995       0.000000       0.268977       0.245000       0.253400       0.146500   -9999.000000
57388     57388     hubei          113.4100       31.1597          115       174     2012      09        17        261              0.219333      23.171753       0.000000       0.264283       0.219500       0.114700       0.104900       0.411000
57388     57388     hubei          113.4100       31.1597          115       174     2012      09        18        262              0.217542      23.374573       0.000000       0.259524       0.210000   -9999.000000   -9999.000000   -9999.000000
57388     57388     hubei          113.4100       31.1597          115       174     2012      09        19        263              0.216083      24.165894       0.056925       0.254398       0.209000   -9999.000000   -9999.000000   -9999.000000
57388     57388     hubei          113.4100       31.1597          115       174     2012      09        20        264              0.214625      24.822021       0.077750       0.249200   -9999.000000       0.223700       0.100000       0.405000
57388     57388     hubei          113.4100       31.1597          115       174     2012      09        21        265              0.214000      25.998383       0.475812       0.244020   -9999.000000       0.261500       0.101200   -9999.000000
57388     57388     hubei          113.4100       31.1597          115       174     2012      09        22        266              0.213292      23.050934       0.000000       0.247960       0.213000   -9999.000000       0.103200       0.451000
57388     57388     hubei          113.4100       31.1597          115       174     2012      09        23        267              0.213000      25.646149       0.168760       0.242296       0.228000       0.143300       0.105100   -9999.000000
57388     57388     hubei          113.4100       31.1597          115       174     2012      09        24        268              0.212500      24.707489       0.000000       0.241059       0.224500   -9999.000000   -9999.000000       0.369000
57388     57388     hubei          113.4100       31.1597          115       174     2012      09        25        269              0.212000      25.729828       0.000000       0.233171       0.235000       0.112000   -9999.000000       0.336000
57388     57388     hubei          113.4100       31.1597          115       174     2012      09        26        270              0.212000      26.360077       0.000000       0.228617   -9999.000000       0.210600       0.121300   -9999.000000
57388     57388     hubei          113.4100       31.1597          115       174     2012      09        27        271              0.212000      25.011749       0.000000       0.226302       0.208000   -9999.000000       0.133800       0.345000
57388     57388     hubei          113.4100       31.1597          115       174     2012      09        28        272              0.212000      25.794403       0.000000       0.218560       0.209000   -9999.000000       0.128200   -9999.000000
57388     57388     hubei          113.4100       31.1597          115       174     2012      09        29        273              0.211917      22.344269       0.000000       0.208778       0.225000   -9999.000000       0.132800       0.160000
57388     57388     hubei          113.4100       31.1597          115       174     2012      09        30        274              0.211500      22.264618       0.000000       0.204339       0.221000   -9999.000000   -9999.000000   -9999.000000
57388     57388     hubei          113.4100       31.1597          115       174     2012      10        01        275              0.211125      20.900391       0.000000       0.203931   -9999.000000   -9999.000000       0.093100   -9999.000000
57388     57388     hubei          113.4100       31.1597          115       174     2012      10        02        276              0.211000      22.141449       0.052940       0.199574       0.203000   -9999.000000       0.091400       0.370000
57388     57388     hubei          113.4100       31.1597          115       174     2012      10        03        277              0.211000      23.253845       0.000000       0.196657       0.211500       0.028900       0.094500   -9999.000000
57388     57388     hubei          113.4100       31.1597          115       174     2012      10        04        278              0.211000      21.962616       0.070093       0.197259       0.198500       0.193700       0.093000       0.254000
57388     57388     hubei          113.4100       31.1597          115       174     2012      10        05        279              0.211000      23.023956       0.618510       0.196055       0.222000       0.120600   -9999.000000   -9999.000000
57388     57388     hubei          113.4100       31.1597          115       174     2012      10        06        280              0.211000      20.945465       0.038491       0.204998       0.218000       0.144500   -9999.000000   -9999.000000
57388     57388     hubei          113.4100       31.1597          115       174     2012      10        07        281              0.211000      23.159363       0.159516       0.202508   -9999.000000   -9999.000000       0.094400       0.395000
57388     57388     hubei          113.4100       31.1597          115       174     2012      10        08        282              0.211000      21.876465       0.084605       0.204518       0.224000       0.307700       0.086500   -9999.000000
57388     57388     hubei          113.4100       31.1597          115       174     2012      10        09        283              0.211000      23.420166       0.000000       0.201829       0.210500       0.138100       0.090400       0.184000
57388     57388     hubei          113.4100       31.1597          115       174     2012      10        10        284              0.211000      23.306885       0.000000       0.196398       0.206500   -9999.000000       0.088000   -9999.000000
57388     57388     hubei          113.4100       31.1597          115       174     2012      10        11        285              0.211000      22.935211       0.000000       0.190283       0.166000       0.196200   -9999.000000   -9999.000000
57388     57388     hubei          113.4100       31.1597          115       174     2012      10        12        286              0.210458      21.517029       0.248340       0.190225   -9999.000000   -9999.000000   -9999.000000       0.282000
57388     57388     hubei          113.4100       31.1597          115       174     2012      10        13        287              0.210000      21.167236       0.000000       0.193655       0.169000       0.264300       0.072800   -9999.000000
57388     57388     hubei          113.4100       31.1597          115       174     2012      10        14        288              0.210000      20.729156       0.430443       0.193754       0.169500       0.044500       0.087000       0.135000
57388     57388     hubei          113.4100       31.1597          115       174     2012      10        15        289              0.210000      21.694489      14.108263       0.193406       0.231000   -9999.000000       0.137200   -9999.000000
57388     57388     hubei          113.4100       31.1597          115       174     2012      10        16        290              0.210708      20.320007       1.317570       0.273361       0.205000       0.076100       0.139600       0.517000
57388     57388     hubei          113.4100       31.1597          115       174     2012      10        17        291              0.211000      18.085999       0.000000       0.275400   -9999.000000   -9999.000000   -9999.000000   -9999.000000
57388     57388     hubei          113.4100       31.1597          115       174     2012      10        18        292              0.211000      17.961243       0.000000       0.257211       0.173000   -9999.000000       0.119700   -9999.000000
57388     57388     hubei          113.4100       31.1597          115       174     2012      10        19        293              0.211478      18.868774       0.000000       0.248243       0.177500       0.280500       0.120000       0.238000
57388     57388     hubei          113.4100       31.1597          115       174     2012      10        20        294              0.212000      19.956360       0.319094       0.243451       0.179500   -9999.000000       0.118800   -9999.000000
57388     57388     hubei          113.4100       31.1597          115       174     2012      10        21        295              0.221917      21.580902      11.593125       0.240848       0.255500       0.163500       0.123300       0.389000
57388     57388     hubei          113.4100       31.1597          115       174     2012      10        22        296              0.239917      21.178131       0.000000       0.277969   -9999.000000       0.255200   -9999.000000   -9999.000000
57388     57388     hubei          113.4100       31.1597          115       174     2012      10        23        297              0.238875      16.202911       0.203591       0.278001   -9999.000000       0.255100   -9999.000000       0.331000
57388     57388     hubei          113.4100       31.1597          115       174     2012      10        24        298              0.238042      17.534973       0.137155       0.265659   -9999.000000       0.124100       0.102700       0.359000
57388     57388     hubei          113.4100       31.1597          115       174     2012      10        25        299              0.000000      16.231995       6.899226       0.263027       0.230000   -9999.000000       0.110000   -9999.000000
57388     57388     hubei          113.4100       31.1597          115       174     2012      10        26        300              0.244875      17.675964      12.912399       0.270594       0.285000       0.106100       0.137400       0.814000
57388     57388     hubei          113.4100       31.1597          115       174     2012      10        27        301              0.244000      16.232422       0.127643       0.319670       0.257000       0.235500       0.123300   -9999.000000
57388     57388     hubei          113.4100       31.1597          115       174     2012      10        28        302              0.000000      18.376190      10.573670       0.292770   -9999.000000   -9999.000000   -9999.000000       0.456000
57388     57388     hubei          113.4100       31.1597          115       174     2012      10        29        303              0.246958      19.148956      14.214834       0.293518       0.303000       0.221300   -9999.000000   -9999.000000
57388     57388     hubei          113.4100       31.1597          115       174     2012      10        30        304              0.245708      16.608307       2.274244       0.334845       0.250000   -9999.000000       0.125900   -9999.000000
57388     57388     hubei          113.4100       31.1597          115       174     2012      10        31        305              0.245000      15.647980       0.000000       0.308023       0.267500       0.341300       0.149500       0.478000
57388     57388     hubei          113.4100       31.1597          115       174     2012      11        01        306              0.244417      15.411255       0.000000       0.298356       0.246000       0.077300       0.152400   -9999.000000
57388     57388     hubei          113.4100       31.1597          115       174     2012      11        02        307              0.244000      14.568634       2.238354       0.293301       0.242000   -9999.000000   -9999.000000       0.431000
57388     57388     hubei          113.4100       31.1597          115       174     2012      11        03        308              0.244000      15.813721       4.674801       0.291425   -9999.000000       0.131800   -9999.000000   -9999.000000
57388     57388     hubei          113.4100       31.1597          115       174     2012      11        04        309              0.244000      11.781158       0.000000       0.308677   -9999.000000   -9999.000000       0.144400   -9999.000000
57388     57388     hubei          113.4100       31.1597          115       174     2012      11        05        310              0.244000      12.476868       5.958446       0.294105       0.237000       0.186700       0.124900       0.361000
57388     57388     hubei          113.4100       31.1597          115       174     2012      11        06        311              0.244125      11.990417       0.000000       0.288716       0.232000       0.244400       0.122700   -9999.000000
57388     57388     hubei          113.4100       31.1597          115       174     2012      11        07        312              0.244000      12.245087       0.149697       0.285178       0.239000   -9999.000000       0.138900       0.466000
57388     57388     hubei          113.4100       31.1597          115       174     2012      11        08        313              0.244000      12.614594       0.041337       0.284502   -9999.000000       0.138200   -9999.000000   -9999.000000
57388     57388     hubei          113.4100       31.1597          115       174     2012      11        09        314              0.244375      12.300018       1.354351       0.284228       0.272000       0.170600   -9999.000000       0.574000
57388     57388     hubei          113.4100       31.1597          115       174     2012      11        10        315              0.245000      11.619202       0.262610       0.288731       0.255000       0.180800       0.110600       0.489000
57388     57388     hubei          113.4100       31.1597          115       174     2012      11        11        316              0.245000      11.360535       0.000000       0.285511       0.192000       0.348800       0.123300   -9999.000000
57388     57388     hubei          113.4100       31.1597          115       174     2012      11        12        317              0.244625      11.243713       0.000000       0.280676       0.194000   -9999.000000       0.126600       0.437000
57388     57388     hubei          113.4100       31.1597          115       174     2012      11        13        318              0.000000      11.427063       0.000000       0.278896   -9999.000000       0.187100       0.124100   -9999.000000
57388     57388     hubei          113.4100       31.1597          115       174     2012      11        14        319              0.244917      13.378784       0.107585       0.277111       0.219000       0.247600   -9999.000000       0.297000
57388     57388     hubei          113.4100       31.1597          115       174     2012      11        15        320              0.245792      13.869110       5.233190       0.275123       0.246000   -9999.000000   -9999.000000   -9999.000000
57388     57388     hubei          113.4100       31.1597          115       174     2012      11        16        321              0.247000      10.455139       0.311240       0.291461       0.211000       0.189500       0.111200   -9999.000000
57388     57388     hubei          113.4100       31.1597          115       174     2012      11        17        322              0.000000      10.131714       0.000000       0.290082       0.210000   -9999.000000       0.118300       0.255000
57388     57388     hubei          113.4100       31.1597          115       174     2012      11        18        323              0.247000      11.014893       0.000000       0.284169       0.212000       0.174500       0.141300   -9999.000000
57388     57388     hubei          113.4100       31.1597          115       174     2012      11        19        324              0.247000      12.625427       1.975139       0.280940   -9999.000000       0.272400   -9999.000000       0.382000
57388     57388     hubei          113.4100       31.1597          115       174     2012      11        20        325              0.247000      13.207153       3.609478       0.285923       0.226000   -9999.000000   -9999.000000   -9999.000000
57388     57388     hubei          113.4100       31.1597          115       174     2012      11        21        326              0.247667      12.319183       0.000000       0.292629       0.205000       0.040900       0.089300       0.432000
57388     57388     hubei          113.4100       31.1597          115       174     2012      11        22        327              0.248000      11.484894       1.853884       0.291237       0.214500   -9999.000000       0.090500       0.358000
57388     57388     hubei          113.4100       31.1597          115       174     2012      11        23        328              0.247833      10.877045       0.000000       0.287053       0.206000   -9999.000000       0.094500   -9999.000000
57388     57388     hubei          113.4100       31.1597          115       174     2012      11        24        329              0.247875       8.268829       1.203398       0.283134   -9999.000000       0.317100       0.100600       0.443000
57388     57388     hubei          113.4100       31.1597          115       174     2012      11        25        330              0.248000       9.045868       0.848959       0.285130   -9999.000000   -9999.000000   -9999.000000   -9999.000000
57388     57388     hubei          113.4100       31.1597          115       174     2012      11        26        331              0.248000       7.471619       0.056643       0.290065       0.189000       0.187900   -9999.000000       0.233000
57388     57388     hubei          113.4100       31.1597          115       174     2012      11        27        332              0.248000       8.346893       0.740426       0.283272       0.204500       0.287800       0.091700   -9999.000000
57388     57388     hubei          113.4100       31.1597          115       174     2012      11        28        333              0.248000       8.988007       0.000000       0.281311       0.188000       0.259000       0.112700   -9999.000000
57388     57388     hubei          113.4100       31.1597          115       174     2012      11        29        334              0.248000       8.892639       1.831691       0.279472       0.202000       0.231600       0.116100       0.402000
57388     57388     hubei          113.4100       31.1597          115       174     2012      11        30        335              0.248000       9.206085       0.000000       0.285044   -9999.000000   -9999.000000       0.115800   -9999.000000
57388     57388     hubei          113.4100       31.1597          115       174     2012      12        01        336              0.248000       9.373383       1.840429       0.283020   -9999.000000       0.134900   -9999.000000       0.304000
57388     57388     hubei          113.4100       31.1597          115       174     2012      12        02        337              0.248000       5.743591       0.000000       0.288700       0.196000       0.351300       0.112500   -9999.000000
57388     57388     hubei          113.4100       31.1597          115       174     2012      12        03        338              0.248000       5.392059       0.765041       0.284688       0.184000   -9999.000000       0.094600   -9999.000000
57388     57388     hubei          113.4100       31.1597          115       174     2012      12        04        339              0.248000       7.145386       0.000000       0.281975       0.189000       0.252400       0.095800       0.243000
57388     57388     hubei          113.4100       31.1597          115       174     2012      12        05        340              0.248333       6.445374       0.068644       0.281255   -9999.000000   -9999.000000       0.102300   -9999.000000
57388     57388     hubei          113.4100       31.1597          115       174     2012      12        06        341              0.248250       7.686157       0.000000       0.278412   -9999.000000       0.108300   -9999.000000       0.042000
57388     57388     hubei          113.4100       31.1597          115       174     2012      12        07        342              0.248000       7.024811       0.000000       0.277811       0.183000       0.062200   -9999.000000   -9999.000000
57388     57388     hubei          113.4100       31.1597          115       174     2012      12        08        343              0.248000       7.944427       0.000000       0.276093       0.179000   -9999.000000       0.094500       0.164000
57388     57388     hubei          113.4100       31.1597          115       174     2012      12        09        344              0.248000       7.347412       1.742093       0.274291       0.181000       0.054400       0.101700       0.139000
57388     57388     hubei          113.4100       31.1597          115       174     2012      12        10        345              0.248000       6.260742       0.742405       0.277025   -9999.000000   -9999.000000       0.097800   -9999.000000
57388     57388     hubei          113.4100       31.1597          115       174     2012      12        11        346              0.247542       4.685150       0.093590       0.284828   -9999.000000   -9999.000000       0.098600       0.062000
57388     57388     hubei          113.4100       31.1597          115       174     2012      12        12        347              0.247708       5.277313       3.907478       0.278875       0.162500       0.171900   -9999.000000   -9999.000000
57388     57388     hubei          113.4100       31.1597          115       174     2012      12        13        348              0.252000       6.248444      16.804947       0.283471       0.197000   -9999.000000   -9999.000000       0.567000
57388     57388     hubei          113.4100       31.1597          115       174     2012      12        14        349              0.251750       5.571777      10.228001       0.331523       0.189000       0.111900       0.087800   -9999.000000
57388     57388     hubei          113.4100       31.1597          115       174     2012      12        15        350              0.000000       4.504517       0.000000       0.327722       0.193000   -9999.000000       0.103700   -9999.000000
57388     57388     hubei          113.4100       31.1597          115       174     2012      12        16        351              0.251000       5.540192       0.343415       0.312968   -9999.000000       0.204100       0.113000       0.357000
57388     57388     hubei          113.4100       31.1597          115       174     2012      12        17        352              0.251792       5.340851      11.526786       0.306357   -9999.000000       0.242900   -9999.000000   -9999.000000
57388     57388     hubei          113.4100       31.1597          115       174     2012      12        18        353              0.251333       4.105774       0.265698       0.323581       0.179000   -9999.000000   -9999.000000       0.278000
57388     57388     hubei          113.4100       31.1597          115       174     2012      12        19        354              0.251000       3.502228       1.011152       0.304108       0.181000       0.266100       0.103900   -9999.000000
57388     57388     hubei          113.4100       31.1597          115       174     2012      12        20        355              0.000000       4.223572       0.294129       0.305277   -9999.000000       0.138800       0.093200       0.254000
57388     57388     hubei          113.4100       31.1597          115       174     2012      12        21        356              0.250333       1.943634       1.037858       0.301810   -9999.000000   -9999.000000       0.092400       0.373000
57388     57388     hubei          113.4100       31.1597          115       174     2012      12        22        357              0.250000       3.802429       0.502284       0.300935   -9999.000000       0.197500       0.104400   -9999.000000
57388     57388     hubei          113.4100       31.1597          115       174     2012      12        23        358              0.250000       3.208099       0.000000       0.290652       0.149000   -9999.000000   -9999.000000       0.101000
57388     57388     hubei          113.4100       31.1597          115       174     2012      12        24        359              0.250000       2.448120       0.203531       0.267559       0.141000   -9999.000000   -9999.000000   -9999.000000
57388     57388     hubei          113.4100       31.1597          115       174     2012      12        25        360              0.249500       3.176575       0.000000       0.281860   -9999.000000       0.334000       0.079200       0.110000
57388     57388     hubei          113.4100       31.1597          115       174     2012      12        26        361              0.000000       1.746918       1.689954       0.276124   -9999.000000   -9999.000000       0.092900   -9999.000000
57388     57388     hubei          113.4100       31.1597          115       174     2012      12        27        362              0.249000       0.764679       0.743965       0.252841   -9999.000000       0.087900       0.100400   -9999.000000
57388     57388     hubei          113.4100       31.1597          115       174     2012      12        28        363              0.249000       1.040924       5.499191       0.261492   -9999.000000   -9999.000000       0.103600       0.341000
57388     57388     hubei          113.4100       31.1597          115       174     2012      12        29        364              0.000000       1.350708       4.618449       0.283334   -9999.000000       0.167800   -9999.000000   -9999.000000
57388     57388     hubei          113.4100       31.1597          115       174     2012      12        30        365              0.000000       0.751526       0.657745       0.275982       0.138000       0.100100   -9999.000000       0.002000
57388     57388     hubei          113.4100       31.1597          115       174     2012      12        31        366              0.250000       1.073975       0.251705       0.239613       0.147000   -9999.000000       0.075600   -9999.000000
