# Supplementary material for: Research on Fusing Multisatellite Soil Moisture Data Based on Bayesian Model Averaging
Source: Hindawi journal article supplement (doi:10.1155/2018/9310838), 2018-06-25
Supplement: f1 [file 9310838.f1.zip › 2012_sm00-10cm_daily_ZDB_ZHY_57395_366days_allin.txt]

57395     57395     hubei          114.1600       31.2800          115       177     2012      01        01        001              0.000000   -9999.000000       0.000000   -9999.000000       0.113000   -9999.000000       0.085700   -9999.000000
57395     57395     hubei          114.1600       31.2800          115       177     2012      01        02        002              0.000000       2.863342       0.000000       0.294980       0.120500       0.164300       0.096400   -9999.000000
57395     57395     hubei          114.1600       31.2800          115       177     2012      01        03        003              0.000000       3.842621       0.000000       0.304508   -9999.000000       0.276300   -9999.000000       0.084000
57395     57395     hubei          114.1600       31.2800          115       177     2012      01        04        004              0.000000       2.073547       0.000000       0.272276   -9999.000000   -9999.000000   -9999.000000   -9999.000000
57395     57395     hubei          114.1600       31.2800          115       177     2012      01        05        005              0.000000       2.413910       0.000000       0.268944   -9999.000000       0.093300       0.079700       0.006000
57395     57395     hubei          114.1600       31.2800          115       177     2012      01        06        006              0.000000       2.327698       0.000000       0.274761       0.112000   -9999.000000       0.090100   -9999.000000
57395     57395     hubei          114.1600       31.2800          115       177     2012      01        07        007              0.000000       4.003815       0.000000       0.286094       0.125000       0.050100       0.101300   -9999.000000
57395     57395     hubei          114.1600       31.2800          115       177     2012      01        08        008              0.000000       2.770721       0.000000       0.291740       0.122500       0.157600       0.097700       0.030000
57395     57395     hubei          114.1600       31.2800          115       177     2012      01        09        009              0.000000       4.208740       0.000000       0.296035       0.129000   -9999.000000   -9999.000000   -9999.000000
57395     57395     hubei          114.1600       31.2800          115       177     2012      01        10        010              0.000000       5.651459       0.000000       0.296015   -9999.000000       0.113700       0.067400       0.066000
57395     57395     hubei          114.1600       31.2800          115       177     2012      01        11        011              0.000000       4.864319       0.000000       0.295105   -9999.000000   -9999.000000       0.069300   -9999.000000
57395     57395     hubei          114.1600       31.2800          115       177     2012      01        12        012              0.000000       2.814911       0.260457       0.292493       0.136000       0.108000       0.069500       0.094000
57395     57395     hubei          114.1600       31.2800          115       177     2012      01        13        013              0.000000       2.934967       6.006480       0.294318       0.138000       0.060800       0.078900   -9999.000000
57395     57395     hubei          114.1600       31.2800          115       177     2012      01        14        014              0.000000       3.245148       0.804456       0.301040   -9999.000000   -9999.000000   -9999.000000   -9999.000000
57395     57395     hubei          114.1600       31.2800          115       177     2012      01        15        015              0.000000       2.239044       0.035997       0.312365   -9999.000000       0.254400   -9999.000000       0.366000
57395     57395     hubei          114.1600       31.2800          115       177     2012      01        16        016              0.096409       3.221497       0.000000       0.304667       0.138000       0.120000       0.060000   -9999.000000
57395     57395     hubei          114.1600       31.2800          115       177     2012      01        17        017              0.000000       4.065918       0.654075       0.302893       0.148000       0.252900       0.065000       0.424000
57395     57395     hubei          114.1600       31.2800          115       177     2012      01        18        018              0.096000       4.016968       0.000000       0.303391   -9999.000000       0.084800       0.074300   -9999.000000
57395     57395     hubei          114.1600       31.2800          115       177     2012      01        19        019              0.096000       3.746063       0.094619       0.301810   -9999.000000   -9999.000000       0.071100   -9999.000000
57395     57395     hubei          114.1600       31.2800          115       177     2012      01        20        020              0.096000       4.175537       0.499372       0.300880   -9999.000000       0.231800   -9999.000000       0.490000
57395     57395     hubei          114.1600       31.2800          115       177     2012      01        21        021              0.095333       3.807800       0.084155       0.299962   -9999.000000       0.214900   -9999.000000   -9999.000000
57395     57395     hubei          114.1600       31.2800          115       177     2012      01        22        022              0.095375       1.460999       0.641611       0.260162   -9999.000000   -9999.000000       0.046000       0.025000
57395     57395     hubei          114.1600       31.2800          115       177     2012      01        23        023              0.094667       0.191772       0.805802       0.213965       0.138000       0.186700       0.069300   -9999.000000
57395     57395     hubei          114.1600       31.2800          115       177     2012      01        24        024              0.094208       1.343964       0.337154       0.234990       0.142000   -9999.000000   -9999.000000   -9999.000000
57395     57395     hubei          114.1600       31.2800          115       177     2012      01        25        025              0.093583       1.940826       0.000000       0.244766   -9999.000000       0.099400       0.073700       0.076000
57395     57395     hubei          114.1600       31.2800          115       177     2012      01        26        026              0.092625       2.478210       0.000000       0.254036   -9999.000000       0.062500   -9999.000000   -9999.000000
57395     57395     hubei          114.1600       31.2800          115       177     2012      01        27        027              0.092042       4.011078       0.000000       0.277128       0.127000   -9999.000000       0.074500       0.080000
57395     57395     hubei          114.1600       31.2800          115       177     2012      01        28        028              0.092750       2.461792       0.000000       0.287508       0.136500       0.075300       0.071700   -9999.000000
57395     57395     hubei          114.1600       31.2800          115       177     2012      01        29        029              0.095083       5.063995       0.396395       0.292836   -9999.000000       0.128400       0.077600       0.086000
57395     57395     hubei          114.1600       31.2800          115       177     2012      01        30        030              0.096333       3.803436       0.000000       0.295001       0.147000       0.112700       0.083600       0.246000
57395     57395     hubei          114.1600       31.2800          115       177     2012      01        31        031              0.096000       4.701294       0.000000       0.293091   -9999.000000       0.093900   -9999.000000   -9999.000000
57395     57395     hubei          114.1600       31.2800          115       177     2012      02        01        032              0.094917       5.886414       0.000000       0.292781   -9999.000000   -9999.000000   -9999.000000       0.008000
57395     57395     hubei          114.1600       31.2800          115       177     2012      02        02        033              0.094333       2.858795      27.173607       0.283658       0.125000       0.177500       0.061200   -9999.000000
57395     57395     hubei          114.1600       31.2800          115       177     2012      02        03        034              0.094292       3.028198       0.000000       0.266825       0.123000       0.233600       0.075200   -9999.000000
57395     57395     hubei          114.1600       31.2800          115       177     2012      02        04        035              0.093917       4.357483       0.000000       0.280094       0.143000       0.132000       0.077500   -9999.000000
57395     57395     hubei          114.1600       31.2800          115       177     2012      02        05        036              0.094292       3.409821       1.706396       0.287136   -9999.000000       0.242600       0.091800   -9999.000000
57395     57395     hubei          114.1600       31.2800          115       177     2012      02        06        037              0.095542       6.023193       0.000000       0.295603   -9999.000000   -9999.000000   -9999.000000       0.164000
57395     57395     hubei          114.1600       31.2800          115       177     2012      02        07        038              0.094500       5.385712       0.000000       0.293883   -9999.000000   -9999.000000   -9999.000000   -9999.000000
57395     57395     hubei          114.1600       31.2800          115       177     2012      02        08        039              0.094250       3.788452       0.000000       0.273921   -9999.000000       0.223100       0.062500       0.010000
57395     57395     hubei          114.1600       31.2800          115       177     2012      02        09        040              0.093000       4.186554       0.000000       0.281710   -9999.000000   -9999.000000       0.073200   -9999.000000
57395     57395     hubei          114.1600       31.2800          115       177     2012      02        10        041              0.093208       2.089508       0.000000       0.270940   -9999.000000       0.063500       0.073900       0.074000
57395     57395     hubei          114.1600       31.2800          115       177     2012      02        11        042              0.093458       4.713806       0.000000       0.276346       0.117000   -9999.000000   -9999.000000   -9999.000000
57395     57395     hubei          114.1600       31.2800          115       177     2012      02        12        043              0.092792       6.120300       0.156441       0.285171       0.127000       0.120900   -9999.000000   -9999.000000
57395     57395     hubei          114.1600       31.2800          115       177     2012      02        13        044              0.092667       4.095093       0.492709       0.288394       0.137000       0.113500   -9999.000000       0.179000
57395     57395     hubei          114.1600       31.2800          115       177     2012      02        14        045              0.093250       3.848450       5.001721       0.290600       0.143000   -9999.000000       0.079400   -9999.000000
57395     57395     hubei          114.1600       31.2800          115       177     2012      02        15        046              0.098542       3.582245       0.647391       0.302682   -9999.000000       0.055900       0.076600       0.538000
57395     57395     hubei          114.1600       31.2800          115       177     2012      02        16        047              0.101292       3.450531       0.368598       0.303645   -9999.000000   -9999.000000       0.082400   -9999.000000
57395     57395     hubei          114.1600       31.2800          115       177     2012      02        17        048              0.099833       6.704773       0.000000       0.298308   -9999.000000       0.118900   -9999.000000   -9999.000000
57395     57395     hubei          114.1600       31.2800          115       177     2012      02        18        049              0.099000       6.248383       0.000000       0.294212       0.124000       0.071900   -9999.000000       0.151000
57395     57395     hubei          114.1600       31.2800          115       177     2012      02        19        050              0.098917       6.699951       0.000000       0.290495       0.119000   -9999.000000       0.058100   -9999.000000
57395     57395     hubei          114.1600       31.2800          115       177     2012      02        20        051              0.097391       7.886047       0.599832       0.288835       0.141000       0.249300       0.063400       0.130000
57395     57395     hubei          114.1600       31.2800          115       177     2012      02        21        052              0.098083       6.220856       0.763381       0.290175   -9999.000000       0.082500   -9999.000000   -9999.000000
57395     57395     hubei          114.1600       31.2800          115       177     2012      02        22        053              0.098542       9.269806       3.533386       0.290011       0.123000       0.204200       0.076500   -9999.000000
57395     57395     hubei          114.1600       31.2800          115       177     2012      02        23        054              0.099000       8.722351       0.813106       0.303114       0.133500       0.181600   -9999.000000       0.520000
57395     57395     hubei          114.1600       31.2800          115       177     2012      02        24        055              0.098958       6.551666       0.000000       0.298458       0.135000   -9999.000000   -9999.000000   -9999.000000
57395     57395     hubei          114.1600       31.2800          115       177     2012      02        25        056              0.097833       4.876984       0.000000       0.295884   -9999.000000       0.477300       0.058100       0.129000
57395     57395     hubei          114.1600       31.2800          115       177     2012      02        26        057              0.097458       4.588928       0.000000       0.293765   -9999.000000       0.187100       0.060700   -9999.000000
57395     57395     hubei          114.1600       31.2800          115       177     2012      02        27        058              0.096652       6.425995       0.310364       0.290185       0.111000   -9999.000000   -9999.000000   -9999.000000
57395     57395     hubei          114.1600       31.2800          115       177     2012      02        28        059              0.096958       6.520874       0.000000       0.289093       0.107500       0.055200   -9999.000000       0.245000
57395     57395     hubei          114.1600       31.2800          115       177     2012      02        29        060              0.000000   -9999.000000       0.000000   -9999.000000       0.118000   -9999.000000   -9999.000000   -9999.000000
57395     57395     hubei          114.1600       31.2800          115       177     2012      03        01        061              0.094458       8.626923       0.000000       0.287231       0.148000       0.239100       0.062200       0.028000
57395     57395     hubei          114.1600       31.2800          115       177     2012      03        02        062              0.093917       7.181152       0.000000       0.288403   -9999.000000       0.164800       0.064400   -9999.000000
57395     57395     hubei          114.1600       31.2800          115       177     2012      03        03        063              0.093917       6.378906       3.689624       0.289280   -9999.000000   -9999.000000       0.080000       0.145000
57395     57395     hubei          114.1600       31.2800          115       177     2012      03        04        064              0.095583       5.460724       0.000000       0.298234       0.162000       0.211700       0.085700   -9999.000000
57395     57395     hubei          114.1600       31.2800          115       177     2012      03        05        065              0.098125       3.917023       0.599693       0.298408       0.148000   -9999.000000   -9999.000000   -9999.000000
57395     57395     hubei          114.1600       31.2800          115       177     2012      03        06        066              0.098250       7.527344       0.315807       0.293523       0.146000       0.100700   -9999.000000       0.119000
57395     57395     hubei          114.1600       31.2800          115       177     2012      03        07        067              0.000000       8.697388       5.125279       0.291204       0.174000       0.097700       0.063300   -9999.000000
57395     57395     hubei          114.1600       31.2800          115       177     2012      03        08        068              0.096750       7.200867       0.462581       0.303681   -9999.000000   -9999.000000       0.071200       0.352000
57395     57395     hubei          114.1600       31.2800          115       177     2012      03        09        069              0.096417       6.506897       0.000000       0.301006   -9999.000000       0.083600       0.074900   -9999.000000
57395     57395     hubei          114.1600       31.2800          115       177     2012      03        10        070              0.097542       7.762054       0.000000       0.295234       0.132000       0.290600       0.070200       0.115000
57395     57395     hubei          114.1600       31.2800          115       177     2012      03        11        071              0.096917      10.347870       0.000000       0.290903       0.125000   -9999.000000   -9999.000000       0.030000
57395     57395     hubei          114.1600       31.2800          115       177     2012      03        12        072              0.096667       8.747986       0.000000       0.288423       0.141000       0.209000   -9999.000000   -9999.000000
57395     57395     hubei          114.1600       31.2800          115       177     2012      03        13        073              0.097565      10.864929       0.000000       0.286358   -9999.000000   -9999.000000       0.056800       0.219000
57395     57395     hubei          114.1600       31.2800          115       177     2012      03        14        074              0.098417      13.209625       1.231620       0.283557       0.116000       0.167700       0.067300   -9999.000000
57395     57395     hubei          114.1600       31.2800          115       177     2012      03        15        075              0.097542      14.954681       3.270660       0.282843       0.159000       0.099200       0.087300       0.511000
57395     57395     hubei          114.1600       31.2800          115       177     2012      03        16        076              0.098696      10.401642       0.000000       0.300585       0.150000   -9999.000000   -9999.000000   -9999.000000
57395     57395     hubei          114.1600       31.2800          115       177     2012      03        17        077              0.098042      10.149231       0.710476       0.293568       0.159000       0.258900   -9999.000000   -9999.000000
57395     57395     hubei          114.1600       31.2800          115       177     2012      03        18        078              0.099042      11.489319       0.000000       0.293917   -9999.000000   -9999.000000       0.067400       0.316000
57395     57395     hubei          114.1600       31.2800          115       177     2012      03        19        079              0.100167      14.942383      11.489611       0.287382       0.170000       0.299900       0.100700   -9999.000000
57395     57395     hubei          114.1600       31.2800          115       177     2012      03        20        080              0.112652       7.013794       0.310799       0.311191       0.156500       0.406300       0.095500       0.489000
57395     57395     hubei          114.1600       31.2800          115       177     2012      03        21        081              0.120739       7.826019      16.059383       0.312363       0.202000   -9999.000000       0.109200   -9999.000000
57395     57395     hubei          114.1600       31.2800          115       177     2012      03        22        082              0.146167       9.919403      26.526497       0.323593   -9999.000000       0.144500   -9999.000000   -9999.000000
57395     57395     hubei          114.1600       31.2800          115       177     2012      03        23        083              0.132750       7.206207       0.000000       0.352141   -9999.000000   -9999.000000   -9999.000000       0.747000
57395     57395     hubei          114.1600       31.2800          115       177     2012      03        24        084              0.127458      11.719421       0.000000       0.323426       0.177000       0.129900   -9999.000000   -9999.000000
57395     57395     hubei          114.1600       31.2800          115       177     2012      03        25        085              0.000000      14.277863       0.000000       0.310872       0.158500       0.183300       0.091000       0.529000
57395     57395     hubei          114.1600       31.2800          115       177     2012      03        26        086              0.120292      16.438171       0.995008       0.303538       0.161000   -9999.000000       0.108300   -9999.000000
57395     57395     hubei          114.1600       31.2800          115       177     2012      03        27        087              0.118125      18.015533       0.000000       0.297343       0.158000       0.123000       0.115300       0.313000
57395     57395     hubei          114.1600       31.2800          115       177     2012      03        28        088              0.118125      19.623352       0.239897       0.291856       0.164000       0.136100   -9999.000000       0.548000
57395     57395     hubei          114.1600       31.2800          115       177     2012      03        29        089              0.115542      20.732452       4.001659       0.287795   -9999.000000   -9999.000000       0.101700   -9999.000000
57395     57395     hubei          114.1600       31.2800          115       177     2012      03        30        090              0.118917      18.215240       3.367939       0.296205   -9999.000000       0.376000       0.110100       0.573000
57395     57395     hubei          114.1600       31.2800          115       177     2012      03        31        091              0.121875      14.687286       0.000000       0.310220       0.154500   -9999.000000       0.104800   -9999.000000
57395     57395     hubei          114.1600       31.2800          115       177     2012      04        01        092              0.119375      17.599335       0.000000       0.295071       0.180500   -9999.000000       0.106100       0.335000
57395     57395     hubei          114.1600       31.2800          115       177     2012      04        02        093              0.116500      19.276398       0.000000       0.288257       0.176000       0.239700   -9999.000000   -9999.000000
57395     57395     hubei          114.1600       31.2800          115       177     2012      04        03        094              0.114458      18.070862       0.000000       0.283139   -9999.000000       0.215700   -9999.000000   -9999.000000
57395     57395     hubei          114.1600       31.2800          115       177     2012      04        04        095              0.111083      17.296722       0.342647       0.280315       0.169000       0.121600       0.073900       0.063000
57395     57395     hubei          114.1600       31.2800          115       177     2012      04        05        096              0.110208      15.307983       0.000000       0.282703       0.163000   -9999.000000       0.075800   -9999.000000
57395     57395     hubei          114.1600       31.2800          115       177     2012      04        06        097              0.109500      17.735687       0.000000       0.280858       0.156000       0.178200       0.079300       0.231000
57395     57395     hubei          114.1600       31.2800          115       177     2012      04        07        098              0.109667      19.644897       0.000000       0.277007       0.153000       0.231500       0.082500   -9999.000000
57395     57395     hubei          114.1600       31.2800          115       177     2012      04        08        099              0.107625      20.812653       0.000000       0.272879   -9999.000000   -9999.000000   -9999.000000       0.179000
57395     57395     hubei          114.1600       31.2800          115       177     2012      04        09        100              0.106083      19.635498       4.839390       0.272802       0.173000       0.162700   -9999.000000       0.814000
57395     57395     hubei          114.1600       31.2800          115       177     2012      04        10        101              0.107583      17.807068       0.000000       0.297247       0.173000   -9999.000000       0.083600   -9999.000000
57395     57395     hubei          114.1600       31.2800          115       177     2012      04        11        102              0.108208      19.246796       0.000000       0.288286       0.181500       0.069800       0.089900       0.130000
57395     57395     hubei          114.1600       31.2800          115       177     2012      04        12        103              0.106208      21.170502       3.774283       0.282804       0.193000   -9999.000000       0.116100   -9999.000000
57395     57395     hubei          114.1600       31.2800          115       177     2012      04        13        104              0.107542      15.275024       0.000000       0.294450   -9999.000000   -9999.000000       0.095900       0.294000
57395     57395     hubei          114.1600       31.2800          115       177     2012      04        14        105              0.106304      17.524475       0.128505       0.287111       0.188000       0.128900   -9999.000000   -9999.000000
57395     57395     hubei          114.1600       31.2800          115       177     2012      04        15        106              0.106875      15.186157       0.000000       0.286870       0.189000       0.148900       0.089200   -9999.000000
57395     57395     hubei          114.1600       31.2800          115       177     2012      04        16        107              0.108042      17.580597       0.000000       0.283062       0.176000       0.057100       0.121400       0.402000
57395     57395     hubei          114.1600       31.2800          115       177     2012      04        17        108              0.106542      20.830963       0.078878       0.278702       0.186000       0.144400       0.124300   -9999.000000
57395     57395     hubei          114.1600       31.2800          115       177     2012      04        18        109              0.104250      20.171295       0.050274       0.277126       0.181000   -9999.000000   -9999.000000       0.190000
57395     57395     hubei          114.1600       31.2800          115       177     2012      04        19        110              0.104583      19.473236       0.000000       0.277833   -9999.000000       0.134300   -9999.000000   -9999.000000
57395     57395     hubei          114.1600       31.2800          115       177     2012      04        20        111              0.101292      23.118988       0.074832       0.271806       0.184000       0.169000   -9999.000000   -9999.000000
57395     57395     hubei          114.1600       31.2800          115       177     2012      04        21        112              0.101542      17.971191       0.000000       0.273865       0.185000   -9999.000000       0.114100       0.281000
57395     57395     hubei          114.1600       31.2800          115       177     2012      04        22        113              0.101292      21.729004       8.576075       0.268399       0.182500       0.075400       0.126200   -9999.000000
57395     57395     hubei          114.1600       31.2800          115       177     2012      04        23        114              0.101375      24.174988       4.040381       0.280973       0.198000   -9999.000000       0.134600       0.663000
57395     57395     hubei          114.1600       31.2800          115       177     2012      04        24        115              0.138333      24.588745      14.140966       0.295188   -9999.000000       0.344500       0.215100   -9999.000000
57395     57395     hubei          114.1600       31.2800          115       177     2012      04        25        116              0.000000      20.783142       1.678760       0.323050       0.222000       0.213400   -9999.000000       0.526000
57395     57395     hubei          114.1600       31.2800          115       177     2012      04        26        117              0.131500      18.947510       0.000000       0.306704       0.195500   -9999.000000   -9999.000000       0.416000
57395     57395     hubei          114.1600       31.2800          115       177     2012      04        27        118              0.125667      21.018188       0.000000       0.293453       0.201000       0.068400   -9999.000000   -9999.000000
57395     57395     hubei          114.1600       31.2800          115       177     2012      04        28        119              0.121958      23.486237      11.576513       0.285054       0.198000   -9999.000000       0.178300       0.643000
57395     57395     hubei          114.1600       31.2800          115       177     2012      04        29        120              0.119958      24.371216       8.691405       0.309222   -9999.000000       0.082200       0.194700   -9999.000000
57395     57395     hubei          114.1600       31.2800          115       177     2012      04        30        121              0.120042      22.652527      10.381348       0.320331       0.240000       0.178200   -9999.000000       0.759000
57395     57395     hubei          114.1600       31.2800          115       177     2012      05        01        122              0.128958      21.586731       0.000000       0.327794       0.257000   -9999.000000   -9999.000000   -9999.000000
57395     57395     hubei          114.1600       31.2800          115       177     2012      05        02        123              0.126042      20.258362       1.452200       0.312116       0.216000       0.123300       0.141200   -9999.000000
57395     57395     hubei          114.1600       31.2800          115       177     2012      05        03        124              0.126875      21.875763       0.429876       0.306666       0.268500       0.178300       0.135100       0.526000
57395     57395     hubei          114.1600       31.2800          115       177     2012      05        04        125              0.127125      22.529663       0.000000       0.304143       0.244000       0.207300       0.130300   -9999.000000
57395     57395     hubei          114.1600       31.2800          115       177     2012      05        05        126              0.124958      23.189331       0.000000       0.298240   -9999.000000   -9999.000000       0.126700       0.326000
57395     57395     hubei          114.1600       31.2800          115       177     2012      05        06        127              0.121250      25.877686       0.000000       0.289110       0.203000   -9999.000000   -9999.000000   -9999.000000
57395     57395     hubei          114.1600       31.2800          115       177     2012      05        07        128              0.141958      27.123352      31.551701       0.282341   -9999.000000       0.406100   -9999.000000       0.948000
57395     57395     hubei          114.1600       31.2800          115       177     2012      05        08        129              0.147583      24.736420       2.770803       0.391682       0.276000       0.272100       0.244100       0.904000
57395     57395     hubei          114.1600       31.2800          115       177     2012      05        09        130              0.142083      26.010742       5.827906       0.322712       0.292000   -9999.000000       0.300200   -9999.000000
57395     57395     hubei          114.1600       31.2800          115       177     2012      05        10        131              0.137917      24.866791       0.000000       0.321929   -9999.000000       0.559700       0.278100       0.517000
57395     57395     hubei          114.1600       31.2800          115       177     2012      05        11        132              0.132333      26.708069       0.000000       0.304430       0.216000   -9999.000000       0.256400   -9999.000000
57395     57395     hubei          114.1600       31.2800          115       177     2012      05        12        133              0.127542      27.378937       4.160229       0.295354       0.274500       0.254700   -9999.000000       0.517000
57395     57395     hubei          114.1600       31.2800          115       177     2012      05        13        134              0.137167      22.475616      16.322515       0.305572       0.285500       0.236600   -9999.000000   -9999.000000
57395     57395     hubei          114.1600       31.2800          115       177     2012      05        14        135              0.158000      24.243561       4.759157       0.321663   -9999.000000   -9999.000000       0.309200   -9999.000000
57395     57395     hubei          114.1600       31.2800          115       177     2012      05        15        136              0.147792      20.932495       0.000000       0.327613   -9999.000000       0.209200       0.319400       0.527000
57395     57395     hubei          114.1600       31.2800          115       177     2012      05        16        137              0.141125      23.457031       0.000000       0.308679       0.228000   -9999.000000       0.359300   -9999.000000
57395     57395     hubei          114.1600       31.2800          115       177     2012      05        17        138              0.135208      25.169067       0.000000       0.298663       0.226500       0.127100   -9999.000000       0.325000
57395     57395     hubei          114.1600       31.2800          115       177     2012      05        18        139              0.129958      26.963348       0.535695       0.290417       0.257000       0.252100   -9999.000000   -9999.000000
57395     57395     hubei          114.1600       31.2800          115       177     2012      05        19        140              0.127458      25.019989       0.000000       0.287855       0.237000   -9999.000000       0.302500   -9999.000000
57395     57395     hubei          114.1600       31.2800          115       177     2012      05        20        141              0.132833      24.803589       0.000000       0.284355   -9999.000000       0.291400       0.296100       0.281000
57395     57395     hubei          114.1600       31.2800          115       177     2012      05        21        142              0.134833      24.966858       0.000000       0.277081       0.229000       0.225500       0.210800   -9999.000000
57395     57395     hubei          114.1600       31.2800          115       177     2012      05        22        143              0.145417      25.104370       2.743615       0.274743       0.259000       0.245000       0.211400       0.786000
57395     57395     hubei          114.1600       31.2800          115       177     2012      05        23        144              0.147333      24.243591       0.695196       0.282969   -9999.000000       0.222700   -9999.000000   -9999.000000
57395     57395     hubei          114.1600       31.2800          115       177     2012      05        24        145              0.146667      23.970764       3.099954       0.283734       0.250000   -9999.000000   -9999.000000       0.612000
57395     57395     hubei          114.1600       31.2800          115       177     2012      05        25        146              0.000000      22.709564       0.311228       0.292224       0.337000       0.151100       0.208500       0.433000
57395     57395     hubei          114.1600       31.2800          115       177     2012      05        26        147              0.147750      22.887482       0.000000       0.287438   -9999.000000       0.386000       0.227100   -9999.000000
57395     57395     hubei          114.1600       31.2800          115       177     2012      05        27        148              0.147333      25.590332       0.000000       0.279197       0.256000       0.185700       0.225900       0.174000
57395     57395     hubei          114.1600       31.2800          115       177     2012      05        28        149              0.146583      26.893066       0.434994       0.273467       0.212000       0.218600       0.240800   -9999.000000
57395     57395     hubei          114.1600       31.2800          115       177     2012      05        29        150              0.188250      28.291016      41.929585       0.266558       0.355000   -9999.000000   -9999.000000       0.735000
57395     57395     hubei          114.1600       31.2800          115       177     2012      05        30        151              0.182833      21.873505       1.359669       0.352845       0.359000       0.415500   -9999.000000   -9999.000000
57395     57395     hubei          114.1600       31.2800          115       177     2012      05        31        152              0.175208      25.225494       0.817577       0.316543   -9999.000000       0.325700   -9999.000000   -9999.000000
57395     57395     hubei          114.1600       31.2800          115       177     2012      06        01        153              0.170292      25.500610       0.789110       0.305226       0.274000   -9999.000000       0.255000       0.406000
57395     57395     hubei          114.1600       31.2800          115       177     2012      06        02        154              0.168250      23.524933       0.000000       0.304834       0.274500       0.050300       0.261000   -9999.000000
57395     57395     hubei          114.1600       31.2800          115       177     2012      06        03        155              0.165083      26.099854       0.586405       0.295842       0.275500   -9999.000000   -9999.000000       0.345000
57395     57395     hubei          114.1600       31.2800          115       177     2012      06        04        156              0.162917      25.797211       0.000000       0.293061       0.308000       0.072700   -9999.000000   -9999.000000
57395     57395     hubei          114.1600       31.2800          115       177     2012      06        05        157              0.165167      26.630310       8.688160       0.288787   -9999.000000       0.302200       0.437200       0.666000
57395     57395     hubei          114.1600       31.2800          115       177     2012      06        06        158              0.182625      26.832489       5.672889       0.301147       0.257000   -9999.000000       0.374500       1.000000
57395     57395     hubei          114.1600       31.2800          115       177     2012      06        07        159              0.177833      25.378296       0.000000       0.319900       0.255000       0.183400       0.353800   -9999.000000
57395     57395     hubei          114.1600       31.2800          115       177     2012      06        08        160              0.172750      28.449158       0.000000       0.300462       0.263500   -9999.000000       0.411100       0.468000
57395     57395     hubei          114.1600       31.2800          115       177     2012      06        09        161              0.167417      29.699097       0.000000       0.290290       0.251000       0.293300   -9999.000000   -9999.000000
57395     57395     hubei          114.1600       31.2800          115       177     2012      06        10        162              0.162750      30.776001       0.000000       0.282128   -9999.000000       0.167200   -9999.000000       0.449000
57395     57395     hubei          114.1600       31.2800          115       177     2012      06        11        163              0.000000      29.500122       0.000000       0.277376       0.254000   -9999.000000       0.232800   -9999.000000
57395     57395     hubei          114.1600       31.2800          115       177     2012      06        12        164              0.153208      27.744354       0.000000       0.273275       0.230000       0.294900       0.257300   -9999.000000
57395     57395     hubei          114.1600       31.2800          115       177     2012      06        13        165              0.148625      29.716217       0.000000       0.265027       0.252000       0.277900       0.272400       0.394000
57395     57395     hubei          114.1600       31.2800          115       177     2012      06        14        166              0.143792      30.141968       0.244229       0.257136       0.275000       0.187900       0.310200   -9999.000000
57395     57395     hubei          114.1600       31.2800          115       177     2012      06        15        167              0.139042      29.030090       0.000000       0.254869       0.268000       0.211400   -9999.000000       0.235000
57395     57395     hubei          114.1600       31.2800          115       177     2012      06        16        168              0.136208      29.155975       0.000000       0.246945   -9999.000000   -9999.000000   -9999.000000   -9999.000000
57395     57395     hubei          114.1600       31.2800          115       177     2012      06        17        169              0.131833      29.196136       0.000000       0.241344       0.234000       0.220400       0.232600   -9999.000000
57395     57395     hubei          114.1600       31.2800          115       177     2012      06        18        170              0.127042      27.989166       0.000000       0.239269       0.230000       0.211000       0.224000       0.287000
57395     57395     hubei          114.1600       31.2800          115       177     2012      06        19        171              0.122250      29.433746       0.000000       0.233444       0.242500   -9999.000000       0.221600   -9999.000000
57395     57395     hubei          114.1600       31.2800          115       177     2012      06        20        172              0.117958      30.597687       0.000000       0.226958       0.240000       0.068400   -9999.000000       0.309000
57395     57395     hubei          114.1600       31.2800          115       177     2012      06        21        173              0.113833      30.895447       0.000000       0.222133   -9999.000000   -9999.000000   -9999.000000   -9999.000000
57395     57395     hubei          114.1600       31.2800          115       177     2012      06        22        174              0.110208      31.336853       0.716792       0.217665       0.219000   -9999.000000       0.201400       0.212000
57395     57395     hubei          114.1600       31.2800          115       177     2012      06        23        175              0.108000      30.813660       0.284117       0.217141       0.220000       0.280900       0.209600       0.141000
57395     57395     hubei          114.1600       31.2800          115       177     2012      06        24        176              0.106417      31.261108       0.095260       0.212019       0.216500   -9999.000000       0.197200   -9999.000000
57395     57395     hubei          114.1600       31.2800          115       177     2012      06        25        177              0.104458      31.867218       0.911942       0.206297       0.212000       0.125500       0.129800       0.129000
57395     57395     hubei          114.1600       31.2800          115       177     2012      06        26        178              0.167667      31.410004      27.360874       0.210347   -9999.000000   -9999.000000   -9999.000000   -9999.000000
57395     57395     hubei          114.1600       31.2800          115       177     2012      06        27        179              0.201417      28.375946      18.816032       0.296168       0.276000       0.211900   -9999.000000       0.804000
57395     57395     hubei          114.1600       31.2800          115       177     2012      06        28        180              0.211167      26.191620      31.001480       0.337300       0.283000       0.338800       0.135900   -9999.000000
57395     57395     hubei          114.1600       31.2800          115       177     2012      06        29        181              0.190208      27.307922       0.102937       0.352852       0.277000   -9999.000000       0.146300   -9999.000000
57395     57395     hubei          114.1600       31.2800          115       177     2012      06        30        182              0.180625      30.263000       0.813425       0.320970       0.278000       0.293100       0.153800   -9999.000000
57395     57395     hubei          114.1600       31.2800          115       177     2012      07        01        183              0.176136      27.815582       0.000000       0.311048   -9999.000000       0.361700       0.145000   -9999.000000
57395     57395     hubei          114.1600       31.2800          115       177     2012      07        02        184              0.172167      29.087585       0.000000       0.304054       0.279000       0.134100   -9999.000000       0.451000
57395     57395     hubei          114.1600       31.2800          115       177     2012      07        03        185              0.166125      31.001099       0.000000       0.293564       0.269000       0.253200       0.214700   -9999.000000
57395     57395     hubei          114.1600       31.2800          115       177     2012      07        04        186              0.160000      31.584015       0.000000       0.284517       0.267000   -9999.000000       0.201300       0.319000
57395     57395     hubei          114.1600       31.2800          115       177     2012      07        05        187              0.156375      31.048676       1.281702       0.277584       0.280000       0.274600       0.196100       0.372000
57395     57395     hubei          114.1600       31.2800          115       177     2012      07        06        188              0.159833      29.476135       0.000000       0.279507   -9999.000000       0.229300       0.221600   -9999.000000
57395     57395     hubei          114.1600       31.2800          115       177     2012      07        07        189              0.158750      31.725983       0.000000       0.274503   -9999.000000   -9999.000000   -9999.000000       0.270000
57395     57395     hubei          114.1600       31.2800          115       177     2012      07        08        190              0.155875      31.948090       0.000000       0.265502       0.276000       0.083300   -9999.000000   -9999.000000
57395     57395     hubei          114.1600       31.2800          115       177     2012      07        09        191              0.150042      32.448639       0.081790       0.255569       0.262500   -9999.000000       0.100500       0.310000
57395     57395     hubei          114.1600       31.2800          115       177     2012      07        10        192              0.143750      32.227905       3.259072       0.246831       0.277500       0.283600       0.118700   -9999.000000
57395     57395     hubei          114.1600       31.2800          115       177     2012      07        11        193              0.164500      31.303772      31.829958       0.260466       0.306000       0.213000       0.114200   -9999.000000
57395     57395     hubei          114.1600       31.2800          115       177     2012      07        12        194              0.215208      31.434540      25.834570       0.310837   -9999.000000   -9999.000000       0.141100       1.000000
57395     57395     hubei          114.1600       31.2800          115       177     2012      07        13        195              0.225136      28.025879      43.458893       0.351523       0.367000       0.470800   -9999.000000   -9999.000000
57395     57395     hubei          114.1600       31.2800          115       177     2012      07        14        196              0.205667      27.207672       0.380767       0.366112       0.359000       0.318700   -9999.000000       0.534000
57395     57395     hubei          114.1600       31.2800          115       177     2012      07        15        197              0.195375      27.973511       0.000000       0.329144       0.352500       0.399900       0.111200   -9999.000000
57395     57395     hubei          114.1600       31.2800          115       177     2012      07        16        198              0.188125      28.228394       0.000000       0.315308       0.358500       0.388700       0.144200   -9999.000000
57395     57395     hubei          114.1600       31.2800          115       177     2012      07        17        199              0.181750      29.730103       1.577680       0.305289       0.362000   -9999.000000       0.158000       0.469000
57395     57395     hubei          114.1600       31.2800          115       177     2012      07        18        200              0.175417      29.783783       0.000000       0.299906   -9999.000000       0.231000       0.151300   -9999.000000
57395     57395     hubei          114.1600       31.2800          115       177     2012      07        19        201              0.170375      29.806610       0.575666       0.293327       0.334000       0.219800   -9999.000000       0.419000
57395     57395     hubei          114.1600       31.2800          115       177     2012      07        20        202              0.166833      30.181610       0.496141       0.290121       0.327000   -9999.000000       0.140000   -9999.000000
57395     57395     hubei          114.1600       31.2800          115       177     2012      07        21        203              0.162652      30.953949       0.157986       0.289713       0.331500       0.299300       0.136300       0.335000
57395     57395     hubei          114.1600       31.2800          115       177     2012      07        22        204              0.158167      32.476593       1.921322       0.283664       0.322000   -9999.000000       0.136800       0.412000
57395     57395     hubei          114.1600       31.2800          115       177     2012      07        23        205              0.153958      31.773712       3.175122       0.284224   -9999.000000       0.308000       0.169500   -9999.000000
57395     57395     hubei          114.1600       31.2800          115       177     2012      07        24        206              0.149917      31.498199       0.118859       0.290951       0.303000       0.160400   -9999.000000       0.427000
57395     57395     hubei          114.1600       31.2800          115       177     2012      07        25        207              0.144708      32.469513       0.000000       0.281392       0.304000       0.172400   -9999.000000   -9999.000000
57395     57395     hubei          114.1600       31.2800          115       177     2012      07        26        208              0.138875      32.733795       0.430352       0.273517       0.320000       0.161800       0.137300       0.332000
57395     57395     hubei          114.1600       31.2800          115       177     2012      07        27        209              0.133083      32.610046       0.000000       0.270061       0.292000   -9999.000000       0.150000   -9999.000000
57395     57395     hubei          114.1600       31.2800          115       177     2012      07        28        210              0.127542      32.830383       1.285971       0.263444   -9999.000000       0.120800       0.151000   -9999.000000
57395     57395     hubei          114.1600       31.2800          115       177     2012      07        29        211              0.122583      32.704468       0.000000       0.265447       0.291000       0.456500       0.165400       0.139000
57395     57395     hubei          114.1600       31.2800          115       177     2012      07        30        212              0.118625      33.209625       0.343294       0.257340       0.265500   -9999.000000   -9999.000000   -9999.000000
57395     57395     hubei          114.1600       31.2800          115       177     2012      07        31        213              0.114958      33.653503       2.202735       0.251479       0.300500       0.168200   -9999.000000       0.231000
57395     57395     hubei          114.1600       31.2800          115       177     2012      08        01        214              0.111125      33.774780       0.404146       0.244502       0.312500   -9999.000000       0.183600   -9999.000000
57395     57395     hubei          114.1600       31.2800          115       177     2012      08        02        215              0.107750      32.324127       0.000000       0.238225       0.298000       0.150800       0.194800       0.366000
57395     57395     hubei          114.1600       31.2800          115       177     2012      08        03        216              0.105708      31.395172       0.000000       0.233439   -9999.000000       0.398700       0.210600       0.272000
57395     57395     hubei          114.1600       31.2800          115       177     2012      08        04        217              0.104042      31.238861       0.593054       0.227747       0.309000   -9999.000000   -9999.000000   -9999.000000
57395     57395     hubei          114.1600       31.2800          115       177     2012      08        05        218              0.103792      30.016266       3.689442       0.236040       0.350000       0.188500   -9999.000000       0.478000
57395     57395     hubei          114.1600       31.2800          115       177     2012      08        06        219              0.101375      30.675568       0.000000       0.257295       0.318000       0.448500       0.189500   -9999.000000
57395     57395     hubei          114.1600       31.2800          115       177     2012      08        07        220              0.115042      31.704102       0.883488       0.245587       0.292000   -9999.000000   -9999.000000       0.283000
57395     57395     hubei          114.1600       31.2800          115       177     2012      08        08        221              0.132500      31.683411       3.242528       0.236319   -9999.000000       0.309400       0.195200   -9999.000000
57395     57395     hubei          114.1600       31.2800          115       177     2012      08        09        222              0.132125      31.368927       7.027230       0.227925       0.361000   -9999.000000       0.228200   -9999.000000
57395     57395     hubei          114.1600       31.2800          115       177     2012      08        10        223              0.150042      29.553986       8.265347       0.260285       0.387000   -9999.000000   -9999.000000       0.544000
57395     57395     hubei          114.1600       31.2800          115       177     2012      08        11        224              0.164583      27.911102       4.882941       0.299127       0.322000       0.343100   -9999.000000   -9999.000000
57395     57395     hubei          114.1600       31.2800          115       177     2012      08        12        225              0.169583      29.411804       0.000000       0.293204       0.304000       0.214700       0.185900       0.425000
57395     57395     hubei          114.1600       31.2800          115       177     2012      08        13        226              0.164542      30.995026       1.232915       0.283799       0.323000       0.137400       0.172300   -9999.000000
57395     57395     hubei          114.1600       31.2800          115       177     2012      08        14        227              0.163583      27.746826       0.587688       0.278317   -9999.000000   -9999.000000       0.162000   -9999.000000
57395     57395     hubei          114.1600       31.2800          115       177     2012      08        15        228              0.162000      28.169586       0.000000       0.280138       0.309000       0.211200       0.168000       0.426000
57395     57395     hubei          114.1600       31.2800          115       177     2012      08        16        229              0.159042      29.618713       0.000000       0.270221       0.299500       0.248100   -9999.000000   -9999.000000
57395     57395     hubei          114.1600       31.2800          115       177     2012      08        17        230              0.156708      29.863129       0.000000       0.261389       0.300500   -9999.000000   -9999.000000       0.240000
57395     57395     hubei          114.1600       31.2800          115       177     2012      08        18        231              0.154750      32.088745       0.130371       0.255902       0.286000       0.076500       0.153300   -9999.000000
57395     57395     hubei          114.1600       31.2800          115       177     2012      08        19        232              0.152417      33.056976       1.716416       0.250073   -9999.000000   -9999.000000       0.158500       0.307000
57395     57395     hubei          114.1600       31.2800          115       177     2012      08        20        233              0.150417      32.373138      39.845093       0.245117       0.310000       0.172400       0.094400       1.000000
57395     57395     hubei          114.1600       31.2800          115       177     2012      08        21        234              0.175208      30.789093       5.477367       0.325289       0.299000       0.421500   -9999.000000   -9999.000000
57395     57395     hubei          114.1600       31.2800          115       177     2012      08        22        235              0.168792      25.657501       0.000000       0.331326       0.285000   -9999.000000   -9999.000000   -9999.000000
57395     57395     hubei          114.1600       31.2800          115       177     2012      08        23        236              0.163167      24.165070       0.504625       0.307714       0.254000       0.394100       0.170300   -9999.000000
57395     57395     hubei          114.1600       31.2800          115       177     2012      08        24        237              0.160250      24.893921       0.296518       0.298423   -9999.000000       0.171400       0.182100       0.460000
57395     57395     hubei          114.1600       31.2800          115       177     2012      08        25        238              0.000000      26.814758       0.405725       0.289887   -9999.000000       0.114900       0.182200   -9999.000000
57395     57395     hubei          114.1600       31.2800          115       177     2012      08        26        239              0.156375      28.721558       3.798544       0.283150       0.299000       0.159100       0.196600   -9999.000000
57395     57395     hubei          114.1600       31.2800          115       177     2012      08        27        240              0.159875      26.885712      24.072399       0.294850       0.282500   -9999.000000   -9999.000000       0.424000
57395     57395     hubei          114.1600       31.2800          115       177     2012      08        28        241              0.161667      25.864594       0.478318       0.340884       0.280500       0.293400   -9999.000000   -9999.000000
57395     57395     hubei          114.1600       31.2800          115       177     2012      08        29        242              0.159875      27.921783       0.000000       0.309185       0.287000       0.272000       0.119600       0.359000
57395     57395     hubei          114.1600       31.2800          115       177     2012      08        30        243              0.157792      29.754639       0.000000       0.297440   -9999.000000       0.205200       0.133300   -9999.000000
57395     57395     hubei          114.1600       31.2800          115       177     2012      08        31        244              0.155542      29.755066       0.000000       0.290706       0.263000       0.199600       0.136500       0.282000
57395     57395     hubei          114.1600       31.2800          115       177     2012      09        01        245              0.152875      30.989105       3.914389       0.283137       0.229000   -9999.000000       0.145800       0.385000
57395     57395     hubei          114.1600       31.2800          115       177     2012      09        02        246              0.150583      30.965027       0.439550       0.291714       0.255000       0.305700   -9999.000000   -9999.000000
57395     57395     hubei          114.1600       31.2800          115       177     2012      09        03        247              0.147583      26.109833       0.000000       0.286756       0.219000       0.282800       0.169200       0.267000
57395     57395     hubei          114.1600       31.2800          115       177     2012      09        04        248              0.144333      27.093323       0.000000       0.277774   -9999.000000   -9999.000000       0.156300   -9999.000000
57395     57395     hubei          114.1600       31.2800          115       177     2012      09        05        249              0.141375      27.250916       0.000000       0.270678       0.234000       0.096400       0.161200       0.314000
57395     57395     hubei          114.1600       31.2800          115       177     2012      09        06        250              0.139500      28.016357       3.785837       0.263978       0.214000   -9999.000000       0.166400   -9999.000000
57395     57395     hubei          114.1600       31.2800          115       177     2012      09        07        251              0.139583      27.831604       0.658181       0.269807       0.242000       0.170500   -9999.000000   -9999.000000
57395     57395     hubei          114.1600       31.2800          115       177     2012      09        08        252              0.165833      28.677094      29.779100       0.277530   -9999.000000       0.270000   -9999.000000       0.784000
57395     57395     hubei          114.1600       31.2800          115       177     2012      09        09        253              0.172875      24.336609       0.000000       0.340543       0.305000   -9999.000000       0.169800   -9999.000000
57395     57395     hubei          114.1600       31.2800          115       177     2012      09        10        254              0.168958      24.181030       0.000000       0.314949   -9999.000000       0.179900       0.213700       0.443000
57395     57395     hubei          114.1600       31.2800          115       177     2012      09        11        255              0.166333      26.242706       0.301609       0.302986       0.199000       0.387600       0.204500   -9999.000000
57395     57395     hubei          114.1600       31.2800          115       177     2012      09        12        256              0.164542      26.463165       2.580060       0.296808       0.202500       0.161200       0.186900   -9999.000000
57395     57395     hubei          114.1600       31.2800          115       177     2012      09        13        257              0.162565      22.432739       0.092872       0.300586       0.198500       0.393200   -9999.000000       0.436000
57395     57395     hubei          114.1600       31.2800          115       177     2012      09        14        258              0.159917      21.578857       0.000000       0.294024       0.187000   -9999.000000   -9999.000000   -9999.000000
57395     57395     hubei          114.1600       31.2800          115       177     2012      09        15        259              0.156958      23.404907       1.179695       0.285030   -9999.000000       0.290800       0.154900       0.281000
57395     57395     hubei          114.1600       31.2800          115       177     2012      09        16        260              0.154125      23.605927       0.000000       0.281375       0.184000       0.486000       0.187900   -9999.000000
57395     57395     hubei          114.1600       31.2800          115       177     2012      09        17        261              0.152000      23.563995       0.000000       0.275657       0.188000       0.304300       0.169100       0.078000
57395     57395     hubei          114.1600       31.2800          115       177     2012      09        18        262              0.150000      23.628876       0.000000       0.273155       0.179000       0.167500       0.162400       0.282000
57395     57395     hubei          114.1600       31.2800          115       177     2012      09        19        263              0.148125      24.755280       0.000000       0.268947       0.180000   -9999.000000   -9999.000000   -9999.000000
57395     57395     hubei          114.1600       31.2800          115       177     2012      09        20        264              0.146292      25.502136       0.017497       0.265183       0.212000       0.243200       0.149600       0.236000
57395     57395     hubei          114.1600       31.2800          115       177     2012      09        21        265              0.145250      26.359528       1.221083       0.262467   -9999.000000       0.190000       0.146600   -9999.000000
57395     57395     hubei          114.1600       31.2800          115       177     2012      09        22        266              0.143917      23.188263       0.000000       0.268522       0.208000   -9999.000000       0.149100       0.243000
57395     57395     hubei          114.1600       31.2800          115       177     2012      09        23        267              0.142792      25.364777       0.000000       0.264312       0.213500       0.135000       0.159800   -9999.000000
57395     57395     hubei          114.1600       31.2800          115       177     2012      09        24        268              0.141500      24.597900       0.000000       0.263133       0.216000   -9999.000000   -9999.000000   -9999.000000
57395     57395     hubei          114.1600       31.2800          115       177     2012      09        25        269              0.140042      25.909515       0.000000       0.257088       0.230000       0.139700   -9999.000000       0.177000
57395     57395     hubei          114.1600       31.2800          115       177     2012      09        26        270              0.139000      25.884613       0.000000       0.254864   -9999.000000       0.425600       0.182700   -9999.000000
57395     57395     hubei          114.1600       31.2800          115       177     2012      09        27        271              0.138929      24.585999       0.000000       0.254828       0.205000   -9999.000000       0.201000       0.116000
57395     57395     hubei          114.1600       31.2800          115       177     2012      09        28        272              0.136563      25.279694       0.000000       0.250147       0.209500   -9999.000000       0.206500   -9999.000000
57395     57395     hubei          114.1600       31.2800          115       177     2012      09        29        273              0.135625      21.844482       0.000000       0.242984       0.205000   -9999.000000       0.206800       0.151000
57395     57395     hubei          114.1600       31.2800          115       177     2012      09        30        274              0.134583      21.667389       0.000000       0.240796       0.206000   -9999.000000   -9999.000000       0.137000
57395     57395     hubei          114.1600       31.2800          115       177     2012      10        01        275              0.133875      20.728027       0.000000       0.242945   -9999.000000       0.207400   -9999.000000   -9999.000000
57395     57395     hubei          114.1600       31.2800          115       177     2012      10        02        276              0.133375      22.513214       0.181751       0.239700       0.163000   -9999.000000       0.113700       0.206000
57395     57395     hubei          114.1600       31.2800          115       177     2012      10        03        277              0.133125      23.197021       0.000000       0.237453       0.159500       0.159000       0.126700   -9999.000000
57395     57395     hubei          114.1600       31.2800          115       177     2012      10        04        278              0.132750      22.215240       0.101345       0.239141       0.167000       0.202300       0.133400       0.085000
57395     57395     hubei          114.1600       31.2800          115       177     2012      10        05        279              0.132333      22.825287       0.842503       0.239141       0.204000       0.173600   -9999.000000   -9999.000000
57395     57395     hubei          114.1600       31.2800          115       177     2012      10        06        280              0.132125      21.532990       0.042937       0.247334       0.194000       0.119200   -9999.000000   -9999.000000
57395     57395     hubei          114.1600       31.2800          115       177     2012      10        07        281              0.132000      23.115845       0.000000       0.245400   -9999.000000   -9999.000000       0.129600       0.214000
57395     57395     hubei          114.1600       31.2800          115       177     2012      10        08        282              0.132333      22.128326       0.378298       0.246411       0.173000       0.148500       0.106800   -9999.000000
57395     57395     hubei          114.1600       31.2800          115       177     2012      10        09        283              0.132250      23.413300       0.000000       0.245414       0.174500       0.163100       0.105300       0.102000
57395     57395     hubei          114.1600       31.2800          115       177     2012      10        10        284              0.131625      23.098572       0.000000       0.241653       0.170500   -9999.000000       0.114600   -9999.000000
57395     57395     hubei          114.1600       31.2800          115       177     2012      10        11        285              0.131208      22.515686       0.000000       0.236961       0.132000       0.282800   -9999.000000   -9999.000000
57395     57395     hubei          114.1600       31.2800          115       177     2012      10        12        286              0.131000      21.453461       0.214885       0.238308   -9999.000000   -9999.000000   -9999.000000       0.283000
57395     57395     hubei          114.1600       31.2800          115       177     2012      10        13        287              0.130917      20.791809       0.000000       0.241265       0.132000       0.068700       0.090000   -9999.000000
57395     57395     hubei          114.1600       31.2800          115       177     2012      10        14        288              0.130792      20.468353       0.000000       0.243609       0.139000       0.144000       0.112700       0.154000
57395     57395     hubei          114.1600       31.2800          115       177     2012      10        15        289              0.131208      21.811249      20.922827       0.243451       0.177000   -9999.000000       0.201000   -9999.000000
57395     57395     hubei          114.1600       31.2800          115       177     2012      10        16        290              0.143250      21.131714       1.366816       0.305241       0.171000       0.186200       0.214500       0.673000
57395     57395     hubei          114.1600       31.2800          115       177     2012      10        17        291              0.147750      17.996918       1.792158       0.305794       0.183000       0.257600   -9999.000000       0.282000
57395     57395     hubei          114.1600       31.2800          115       177     2012      10        18        292              0.147000      17.853333       0.000000       0.288009   -9999.000000       0.179500   -9999.000000   -9999.000000
57395     57395     hubei          114.1600       31.2800          115       177     2012      10        19        293              0.145913      19.199280       0.000000       0.281524       0.151000       0.291400       0.172200       0.199000
57395     57395     hubei          114.1600       31.2800          115       177     2012      10        20        294              0.145292      19.998199       0.000000       0.278497       0.146000   -9999.000000       0.193100   -9999.000000
57395     57395     hubei          114.1600       31.2800          115       177     2012      10        21        295              0.147208      21.873871      12.691773       0.276445       0.185000       0.646000       0.209400       0.266000
57395     57395     hubei          114.1600       31.2800          115       177     2012      10        22        296              0.157250      21.858917       0.226607       0.300989   -9999.000000       0.410700   -9999.000000   -9999.000000
57395     57395     hubei          114.1600       31.2800          115       177     2012      10        23        297              0.154917      16.438599       0.079810       0.300084   -9999.000000       0.380000   -9999.000000   -9999.000000
57395     57395     hubei          114.1600       31.2800          115       177     2012      10        24        298              0.153375      18.053925       0.000000       0.289664   -9999.000000       0.233900       0.131900       0.261000
57395     57395     hubei          114.1600       31.2800          115       177     2012      10        25        299              0.000000      16.529510       2.752588       0.287577       0.205000   -9999.000000       0.146800   -9999.000000
57395     57395     hubei          114.1600       31.2800          115       177     2012      10        26        300              0.172833      18.321381      28.913120       0.289080       0.236000       0.295200       0.167800       0.830000
57395     57395     hubei          114.1600       31.2800          115       177     2012      10        27        301              0.169125      16.983795       0.000000       0.345156       0.216000       0.182500       0.174600   -9999.000000
57395     57395     hubei          114.1600       31.2800          115       177     2012      10        28        302              0.000000      18.477570       6.292800       0.315033   -9999.000000   -9999.000000   -9999.000000       0.549000
57395     57395     hubei          114.1600       31.2800          115       177     2012      10        29        303              0.176417      20.029175      21.289307       0.311375       0.209000       0.337000   -9999.000000       0.867000
57395     57395     hubei          114.1600       31.2800          115       177     2012      10        30        304              0.169875      16.809814       1.082386       0.346853       0.209500   -9999.000000       0.133600   -9999.000000
57395     57395     hubei          114.1600       31.2800          115       177     2012      10        31        305              0.166083      16.170044       0.000000       0.319613       0.221500       0.266200       0.159200       0.510000
57395     57395     hubei          114.1600       31.2800          115       177     2012      11        01        306              0.163667      16.167664       0.000000       0.309967       0.203500       0.392800       0.166400   -9999.000000
57395     57395     hubei          114.1600       31.2800          115       177     2012      11        02        307              0.162083      15.514465       0.000000       0.304839       0.210000   -9999.000000       0.178400       0.476000
57395     57395     hubei          114.1600       31.2800          115       177     2012      11        03        308              0.166625      16.985931       5.560581       0.299591   -9999.000000       0.290600   -9999.000000   -9999.000000
57395     57395     hubei          114.1600       31.2800          115       177     2012      11        04        309              0.165391      12.848267       0.000000       0.314339   -9999.000000       0.154500       0.163200   -9999.000000
57395     57395     hubei          114.1600       31.2800          115       177     2012      11        05        310              0.162625      13.428986       0.000000       0.301880       0.192000       0.260700       0.179700       0.439000
57395     57395     hubei          114.1600       31.2800          115       177     2012      11        06        311              0.160708      13.106812       0.000000       0.296448       0.190000       0.331800       0.182700   -9999.000000
57395     57395     hubei          114.1600       31.2800          115       177     2012      11        07        312              0.160333      13.455536       1.815052       0.293076       0.210000   -9999.000000       0.211100       0.500000
57395     57395     hubei          114.1600       31.2800          115       177     2012      11        08        313              0.166208      14.017059       0.200971       0.294948   -9999.000000       0.380200   -9999.000000   -9999.000000
57395     57395     hubei          114.1600       31.2800          115       177     2012      11        09        314              0.165625      13.207336       2.486558       0.296546       0.208000       0.386400   -9999.000000   -9999.000000
57395     57395     hubei          114.1600       31.2800          115       177     2012      11        10        315              0.165000      11.922791       0.000000       0.302509       0.208000       0.192500       0.169900       0.454000
57395     57395     hubei          114.1600       31.2800          115       177     2012      11        11        316              0.162958      11.023651       0.247958       0.297576       0.155000       0.306800       0.189800   -9999.000000
57395     57395     hubei          114.1600       31.2800          115       177     2012      11        12        317              0.161542      11.776947       0.000000       0.293235       0.185000   -9999.000000       0.154000       0.416000
57395     57395     hubei          114.1600       31.2800          115       177     2012      11        13        318              0.000000      12.801971       0.000000       0.290624       0.182000       0.453000       0.160400   -9999.000000
57395     57395     hubei          114.1600       31.2800          115       177     2012      11        14        319              0.159625      14.407257       0.000000       0.288608   -9999.000000       0.122800   -9999.000000       0.458000
57395     57395     hubei          114.1600       31.2800          115       177     2012      11        15        320              0.158167      13.839935       2.907632       0.285851       0.175000   -9999.000000   -9999.000000       0.353000
57395     57395     hubei          114.1600       31.2800          115       177     2012      11        16        321              0.159375      11.187622       0.430575       0.292815       0.169500       0.120100       0.122600   -9999.000000
57395     57395     hubei          114.1600       31.2800          115       177     2012      11        17        322              0.000000      10.358154       0.000000       0.295426       0.161000   -9999.000000       0.142900       0.236000
57395     57395     hubei          114.1600       31.2800          115       177     2012      11        18        323              0.158167      11.522949       0.000000       0.290623       0.174000       0.121800       0.165100   -9999.000000
57395     57395     hubei          114.1600       31.2800          115       177     2012      11        19        324              0.157833      12.830170       0.000000       0.287983   -9999.000000       0.338200   -9999.000000       0.315000
57395     57395     hubei          114.1600       31.2800          115       177     2012      11        20        325              0.157000      13.687408       2.484417       0.286600       0.178000   -9999.000000   -9999.000000   -9999.000000
57395     57395     hubei          114.1600       31.2800          115       177     2012      11        21        326              0.157875      12.300720       0.000000       0.292809       0.166500       0.151900       0.114600   -9999.000000
57395     57395     hubei          114.1600       31.2800          115       177     2012      11        22        327              0.158000      10.987549       1.994645       0.293517       0.182000       0.219800       0.114900       0.507000
57395     57395     hubei          114.1600       31.2800          115       177     2012      11        23        328              0.157875      10.569489       0.000000       0.296454   -9999.000000   -9999.000000       0.111200   -9999.000000
57395     57395     hubei          114.1600       31.2800          115       177     2012      11        24        329              0.157000       8.681732       1.758156       0.294378   -9999.000000       0.278600       0.128300       0.378000
57395     57395     hubei          114.1600       31.2800          115       177     2012      11        25        330              0.157792      10.218536       0.997962       0.294803   -9999.000000   -9999.000000   -9999.000000   -9999.000000
57395     57395     hubei          114.1600       31.2800          115       177     2012      11        26        331              0.157542       7.919708       0.000000       0.300019       0.147000       0.267700   -9999.000000       0.253000
57395     57395     hubei          114.1600       31.2800          115       177     2012      11        27        332              0.156792       8.760132       0.000000       0.292786       0.171000       0.434400       0.100600       0.393000
57395     57395     hubei          114.1600       31.2800          115       177     2012      11        28        333              0.156250       9.939117       0.000000       0.290285       0.164000       0.147400       0.129200   -9999.000000
57395     57395     hubei          114.1600       31.2800          115       177     2012      11        29        334              0.155500       9.461212       0.176827       0.288404       0.182000       0.389400       0.126300       0.373000
57395     57395     hubei          114.1600       31.2800          115       177     2012      11        30        335              0.155000      10.070465       0.000000       0.288005   -9999.000000   -9999.000000       0.138800   -9999.000000
57395     57395     hubei          114.1600       31.2800          115       177     2012      12        01        336              0.155167      10.019318       2.081868       0.287857       0.175000       0.359100   -9999.000000       0.362000
57395     57395     hubei          114.1600       31.2800          115       177     2012      12        02        337              0.156000       5.959290       0.000000       0.295145   -9999.000000       0.233000   -9999.000000   -9999.000000
57395     57395     hubei          114.1600       31.2800          115       177     2012      12        03        338              0.155667       5.177979       0.000000       0.292704       0.168000   -9999.000000       0.092300   -9999.000000
57395     57395     hubei          114.1600       31.2800          115       177     2012      12        04        339              0.155000       8.149414       0.000000       0.289763       0.179000       0.215400       0.100600       0.285000
57395     57395     hubei          114.1600       31.2800          115       177     2012      12        05        340              0.154583       8.000946       0.000000       0.289135   -9999.000000   -9999.000000       0.115300   -9999.000000
57395     57395     hubei          114.1600       31.2800          115       177     2012      12        06        341              0.153917       8.747131       0.000000       0.286732       0.155000       0.238100   -9999.000000       0.203000
57395     57395     hubei          114.1600       31.2800          115       177     2012      12        07        342              0.153261       8.242004       0.000000       0.286375       0.164000       0.232000   -9999.000000   -9999.000000
57395     57395     hubei          114.1600       31.2800          115       177     2012      12        08        343              0.152750       8.795654       0.000000       0.284777       0.159000   -9999.000000       0.102600   -9999.000000
57395     57395     hubei          114.1600       31.2800          115       177     2012      12        09        344              0.152000       7.749176       1.657083       0.283329       0.161000       0.181300       0.104600       0.235000
57395     57395     hubei          114.1600       31.2800          115       177     2012      12        10        345              0.152000       6.324219       1.036329       0.285385   -9999.000000   -9999.000000       0.110400   -9999.000000
57395     57395     hubei          114.1600       31.2800          115       177     2012      12        11        346              0.151333       4.153015       0.076094       0.293404   -9999.000000   -9999.000000       0.121700       0.175000
57395     57395     hubei          114.1600       31.2800          115       177     2012      12        12        347              0.151000       5.602234       3.165437       0.287739       0.148000       0.184900   -9999.000000   -9999.000000
57395     57395     hubei          114.1600       31.2800          115       177     2012      12        13        348              0.172875       7.152557      40.935654       0.292218       0.188500   -9999.000000   -9999.000000       0.614000
57395     57395     hubei          114.1600       31.2800          115       177     2012      12        14        349              0.171583       5.829010      10.690963       0.358257   -9999.000000       0.178500       0.097300       0.858000
57395     57395     hubei          114.1600       31.2800          115       177     2012      12        15        350              0.000000       4.169525       0.000000       0.337403   -9999.000000       0.144500       0.135900   -9999.000000
57395     57395     hubei          114.1600       31.2800          115       177     2012      12        16        351              0.166125       4.780212       0.000000       0.327756   -9999.000000       0.189000       0.131300       0.527000
57395     57395     hubei          114.1600       31.2800          115       177     2012      12        17        352              0.168292       5.019775      14.383609       0.317070   -9999.000000       0.321200       0.124500   -9999.000000
57395     57395     hubei          114.1600       31.2800          115       177     2012      12        18        353              0.168167       4.350800       0.505810       0.331246   -9999.000000   -9999.000000   -9999.000000       0.419000
57395     57395     hubei          114.1600       31.2800          115       177     2012      12        19        354              0.165458       3.469421       2.504593       0.319082   -9999.000000       0.288400       0.130700   -9999.000000
57395     57395     hubei          114.1600       31.2800          115       177     2012      12        20        355              0.000000       4.746185       1.784603       0.312918   -9999.000000       0.283900       0.122300   -9999.000000
57395     57395     hubei          114.1600       31.2800          115       177     2012      12        21        356              0.164458       1.708160       0.455578       0.305411   -9999.000000   -9999.000000       0.126200       0.450000
57395     57395     hubei          114.1600       31.2800          115       177     2012      12        22        357              0.162792       3.365356       0.000000       0.306253   -9999.000000       0.229200       0.133900   -9999.000000
57395     57395     hubei          114.1600       31.2800          115       177     2012      12        23        358              0.161083       3.103119       0.000000       0.297016   -9999.000000   -9999.000000   -9999.000000       0.169000
57395     57395     hubei          114.1600       31.2800          115       177     2012      12        24        359              0.159263       2.405762       0.000000       0.272690   -9999.000000       0.140500   -9999.000000   -9999.000000
57395     57395     hubei          114.1600       31.2800          115       177     2012      12        25        360              0.159000       3.886230       2.442484       0.293311   -9999.000000       0.278100       0.097500       0.306000
57395     57395     hubei          114.1600       31.2800          115       177     2012      12        26        361              0.000000       1.915161       0.319176       0.282689   -9999.000000   -9999.000000       0.121200       0.066000
57395     57395     hubei          114.1600       31.2800          115       177     2012      12        27        362              0.159000       0.761353       1.391605       0.254889   -9999.000000   -9999.000000       0.119500   -9999.000000
57395     57395     hubei          114.1600       31.2800          115       177     2012      12        28        363              0.000000       1.009521       3.804895       0.269740   -9999.000000   -9999.000000       0.133900       0.479000
57395     57395     hubei          114.1600       31.2800          115       177     2012      12        29        364              0.000000       1.662476       4.040162       0.295188   -9999.000000   -9999.000000   -9999.000000   -9999.000000
57395     57395     hubei          114.1600       31.2800          115       177     2012      12        30        365              0.000000       0.665924       2.225798       0.267249   -9999.000000       0.204700   -9999.000000       0.199000
57395     57395     hubei          114.1600       31.2800          115       177     2012      12        31        366              0.158000       1.235535       1.045276       0.258024   -9999.000000   -9999.000000       0.080500   -9999.000000
