# Supplementary material for: Research on Fusing Multisatellite Soil Moisture Data Based on Bayesian Model Averaging
Source: Hindawi journal article supplement (doi:10.1155/2018/9310838), 2018-06-25
Supplement: f1 [file 9310838.f1.zip › 2012_sm00-10cm_daily_ZDB_ZHY_57439_366days_allin.txt]

57439     57439     hubei          108.9197       30.2700          119       156     2012      01        01        001              0.000000   -9999.000000       7.134845   -9999.000000       0.097000   -9999.000000       0.050100   -9999.000000
57439     57439     hubei          108.9197       30.2700          119       156     2012      01        02        002              0.268500       1.524719       4.953795       0.252648   -9999.000000       0.188300   -9999.000000       0.031000
57439     57439     hubei          108.9197       30.2700          119       156     2012      01        03        003              0.000000       1.513367       1.244905       0.269084   -9999.000000   -9999.000000   -9999.000000   -9999.000000
57439     57439     hubei          108.9197       30.2700          119       156     2012      01        04        004              0.281500       0.915588       0.338870       0.255954   -9999.000000   -9999.000000       0.042200       0.033000
57439     57439     hubei          108.9197       30.2700          119       156     2012      01        05        005              0.280250       0.634735       0.495727       0.228291   -9999.000000       0.122300       0.043800   -9999.000000
57439     57439     hubei          108.9197       30.2700          119       156     2012      01        06        006              0.276042       0.325226       0.489775       0.196165   -9999.000000   -9999.000000       0.045300   -9999.000000
57439     57439     hubei          108.9197       30.2700          119       156     2012      01        07        007              0.271167       0.485840       0.528793       0.196870   -9999.000000       0.166900   -9999.000000       0.086000
57439     57439     hubei          108.9197       30.2700          119       156     2012      01        08        008              0.000000       0.651276       0.290227       0.207635   -9999.000000   -9999.000000   -9999.000000   -9999.000000
57439     57439     hubei          108.9197       30.2700          119       156     2012      01        09        009              0.266667       1.222290       0.207064       0.230029   -9999.000000       0.161300   -9999.000000       0.253000
57439     57439     hubei          108.9197       30.2700          119       156     2012      01        10        010              0.269208       1.338287       0.608904       0.239828   -9999.000000   -9999.000000       0.042300   -9999.000000
57439     57439     hubei          108.9197       30.2700          119       156     2012      01        11        011              0.272167       1.091766       0.304942       0.233501   -9999.000000   -9999.000000       0.044200       0.158000
57439     57439     hubei          108.9197       30.2700          119       156     2012      01        12        012              0.268375       1.117950       0.182786       0.231162   -9999.000000   -9999.000000       0.041200       0.064000
57439     57439     hubei          108.9197       30.2700          119       156     2012      01        13        013              0.266833       1.413391       0.876677       0.240260   -9999.000000   -9999.000000   -9999.000000   -9999.000000
57439     57439     hubei          108.9197       30.2700          119       156     2012      01        14        014              0.269917       1.546326       0.066621       0.250766   -9999.000000   -9999.000000   -9999.000000       0.355000
57439     57439     hubei          108.9197       30.2700          119       156     2012      01        15        015              0.285000       1.485107       0.599219       0.255813   -9999.000000   -9999.000000       0.041700   -9999.000000
57439     57439     hubei          108.9197       30.2700          119       156     2012      01        16        016              0.277917       1.889771       0.000000       0.259703   -9999.000000   -9999.000000       0.039000       0.246000
57439     57439     hubei          108.9197       30.2700          119       156     2012      01        17        017              0.000000       1.609772       0.299500       0.257560   -9999.000000       0.150600       0.037600   -9999.000000
57439     57439     hubei          108.9197       30.2700          119       156     2012      01        18        018              0.271375       1.560516       0.760926       0.256019   -9999.000000       0.116300       0.039700   -9999.000000
57439     57439     hubei          108.9197       30.2700          119       156     2012      01        19        019              0.279000       1.678284       0.970259       0.259169   -9999.000000   -9999.000000   -9999.000000       0.293000
57439     57439     hubei          108.9197       30.2700          119       156     2012      01        20        020              0.285208       1.360535       1.056996       0.254826   -9999.000000   -9999.000000   -9999.000000   -9999.000000
57439     57439     hubei          108.9197       30.2700          119       156     2012      01        21        021              0.291375       1.123688       2.552539       0.246340   -9999.000000   -9999.000000       0.034600       0.120000
57439     57439     hubei          108.9197       30.2700          119       156     2012      01        22        022              0.284042       0.666534       0.695810       0.224048   -9999.000000   -9999.000000       0.037400   -9999.000000
57439     57439     hubei          108.9197       30.2700          119       156     2012      01        23        023              0.276708       0.267944       1.474723       0.190064   -9999.000000   -9999.000000       0.036600   -9999.000000
57439     57439     hubei          108.9197       30.2700          119       156     2012      01        24        024              0.284167       0.184540       0.404081       0.180341   -9999.000000   -9999.000000   -9999.000000       0.080000
57439     57439     hubei          108.9197       30.2700          119       156     2012      01        25        025              0.274167       0.495605       0.071447       0.190839   -9999.000000       0.070000   -9999.000000   -9999.000000
57439     57439     hubei          108.9197       30.2700          119       156     2012      01        26        026              0.270042       0.836395       0.000000       0.201159   -9999.000000   -9999.000000       0.037200       0.194000
57439     57439     hubei          108.9197       30.2700          119       156     2012      01        27        027              0.268375       1.140411       0.072929       0.218353   -9999.000000   -9999.000000       0.038800   -9999.000000
57439     57439     hubei          108.9197       30.2700          119       156     2012      01        28        028              0.270708       1.477417       0.405180       0.233577   -9999.000000   -9999.000000       0.037900       0.239000
57439     57439     hubei          108.9197       30.2700          119       156     2012      01        29        029              0.272042       1.631104       0.071923       0.244306   -9999.000000   -9999.000000       0.036700       0.325000
57439     57439     hubei          108.9197       30.2700          119       156     2012      01        30        030              0.269833       1.787384       0.181209       0.245679   -9999.000000       0.070300   -9999.000000   -9999.000000
57439     57439     hubei          108.9197       30.2700          119       156     2012      01        31        031              0.267292       2.355743       1.042521       0.251466   -9999.000000   -9999.000000   -9999.000000       0.123000
57439     57439     hubei          108.9197       30.2700          119       156     2012      02        01        032              0.266708       3.840942       0.777847       0.262293       0.089000       0.031300       0.046200   -9999.000000
57439     57439     hubei          108.9197       30.2700          119       156     2012      02        02        033              0.267833       2.978851       0.109194       0.266774   -9999.000000       0.093900       0.047500       0.200000
57439     57439     hubei          108.9197       30.2700          119       156     2012      02        03        034              0.268708       2.249420       0.445375       0.261989   -9999.000000   -9999.000000       0.047700   -9999.000000
57439     57439     hubei          108.9197       30.2700          119       156     2012      02        04        035              0.266917       2.870605       0.000000       0.267408   -9999.000000       0.051900       0.047200   -9999.000000
57439     57439     hubei          108.9197       30.2700          119       156     2012      02        05        036              0.265917       3.422241       0.000000       0.269810       0.085000       0.020300   -9999.000000       0.122000
57439     57439     hubei          108.9197       30.2700          119       156     2012      02        06        037              0.268500       3.231476       0.159675       0.270504       0.095000   -9999.000000   -9999.000000   -9999.000000
57439     57439     hubei          108.9197       30.2700          119       156     2012      02        07        038              0.265667       3.013641       0.000000       0.269535   -9999.000000       0.080200       0.033400       0.162000
57439     57439     hubei          108.9197       30.2700          119       156     2012      02        08        039              0.262250       2.283569       0.000000       0.258735   -9999.000000   -9999.000000       0.035500   -9999.000000
57439     57439     hubei          108.9197       30.2700          119       156     2012      02        09        040              0.259292       1.675171       0.000000       0.240169   -9999.000000       0.046600       0.034800   -9999.000000
57439     57439     hubei          108.9197       30.2700          119       156     2012      02        10        041              0.257375       0.515442       0.000000       0.202147   -9999.000000   -9999.000000   -9999.000000   -9999.000000
57439     57439     hubei          108.9197       30.2700          119       156     2012      02        11        042              0.254792       1.065063       0.000000       0.221116   -9999.000000   -9999.000000   -9999.000000   -9999.000000
57439     57439     hubei          108.9197       30.2700          119       156     2012      02        12        043              0.251667       1.871887       0.000000       0.241101   -9999.000000   -9999.000000   -9999.000000       0.090000
57439     57439     hubei          108.9197       30.2700          119       156     2012      02        13        044              0.250333       2.483154       0.000000       0.253126   -9999.000000   -9999.000000       0.039700   -9999.000000
57439     57439     hubei          108.9197       30.2700          119       156     2012      02        14        045              0.252042       2.169037       0.075380       0.260950   -9999.000000   -9999.000000   -9999.000000       0.210000
57439     57439     hubei          108.9197       30.2700          119       156     2012      02        15        046              0.252333       2.344299       0.578062       0.263872   -9999.000000   -9999.000000       0.043300   -9999.000000
57439     57439     hubei          108.9197       30.2700          119       156     2012      02        16        047              0.250091       2.346893       0.066461       0.260952   -9999.000000   -9999.000000   -9999.000000   -9999.000000
57439     57439     hubei          108.9197       30.2700          119       156     2012      02        17        048              0.247458       2.881042       0.000000       0.261956   -9999.000000       0.048800   -9999.000000       0.119000
57439     57439     hubei          108.9197       30.2700          119       156     2012      02        18        049              0.246167       3.110809       0.000000       0.259556   -9999.000000   -9999.000000       0.036800   -9999.000000
57439     57439     hubei          108.9197       30.2700          119       156     2012      02        19        050              0.245083       1.945404       0.324936       0.246750   -9999.000000   -9999.000000       0.043000       0.113000
57439     57439     hubei          108.9197       30.2700          119       156     2012      02        20        051              0.240565       3.441437       0.000000       0.257681   -9999.000000   -9999.000000       0.038000   -9999.000000
57439     57439     hubei          108.9197       30.2700          119       156     2012      02        21        052              0.237875       3.304169       6.826294       0.265694       0.071000   -9999.000000   -9999.000000   -9999.000000
57439     57439     hubei          108.9197       30.2700          119       156     2012      02        22        053              0.237333       4.466705       0.036080       0.267484       0.066500   -9999.000000   -9999.000000       0.266000
57439     57439     hubei          108.9197       30.2700          119       156     2012      02        23        054              0.239042       5.259277       0.802888       0.268087       0.069000       0.017100   -9999.000000   -9999.000000
57439     57439     hubei          108.9197       30.2700          119       156     2012      02        24        055              0.243208       4.625916       0.927923       0.271471       0.071000   -9999.000000       0.037200       0.341000
57439     57439     hubei          108.9197       30.2700          119       156     2012      02        25        056              0.243458       4.264282       0.174268       0.272265   -9999.000000   -9999.000000       0.037500   -9999.000000
57439     57439     hubei          108.9197       30.2700          119       156     2012      02        26        057              0.243000       2.659729       0.447790       0.264725   -9999.000000   -9999.000000       0.036800       0.053000
57439     57439     hubei          108.9197       30.2700          119       156     2012      02        27        058              0.266957       2.077942       2.343059       0.257192   -9999.000000   -9999.000000   -9999.000000       0.061000
57439     57439     hubei          108.9197       30.2700          119       156     2012      02        28        059              0.266833       2.208099       3.287409       0.264058   -9999.000000   -9999.000000   -9999.000000   -9999.000000
57439     57439     hubei          108.9197       30.2700          119       156     2012      02        29        060              0.000000   -9999.000000       0.140090   -9999.000000   -9999.000000   -9999.000000   -9999.000000   -9999.000000
57439     57439     hubei          108.9197       30.2700          119       156     2012      03        01        061              0.260333       2.915680       0.000000       0.264884   -9999.000000       0.007600       0.036200   -9999.000000
57439     57439     hubei          108.9197       30.2700          119       156     2012      03        02        062              0.262167       3.797546       0.069031       0.269234   -9999.000000   -9999.000000       0.035600       0.136000
57439     57439     hubei          108.9197       30.2700          119       156     2012      03        03        063              0.265042       3.395477       0.000000       0.269721   -9999.000000   -9999.000000       0.039500   -9999.000000
57439     57439     hubei          108.9197       30.2700          119       156     2012      03        04        064              0.261417       2.959656       0.000000       0.268280   -9999.000000   -9999.000000   -9999.000000   -9999.000000
57439     57439     hubei          108.9197       30.2700          119       156     2012      03        05        065              0.260042       2.986664       0.212055       0.266876       0.081000   -9999.000000   -9999.000000       0.077000
57439     57439     hubei          108.9197       30.2700          119       156     2012      03        06        066              0.267958       6.739441       1.956246       0.267941   -9999.000000       0.170800       0.040300   -9999.000000
57439     57439     hubei          108.9197       30.2700          119       156     2012      03        07        067              0.000000       3.749603       2.031645       0.272720   -9999.000000   -9999.000000       0.039200       0.135000
57439     57439     hubei          108.9197       30.2700          119       156     2012      03        08        068              0.292208       2.478577       1.605667       0.271900   -9999.000000   -9999.000000       0.041700   -9999.000000
57439     57439     hubei          108.9197       30.2700          119       156     2012      03        09        069              0.292333       2.680084       2.865914       0.271567   -9999.000000   -9999.000000   -9999.000000       0.292000
57439     57439     hubei          108.9197       30.2700          119       156     2012      03        10        070              0.282750       3.234406       1.351360       0.278273       0.080000   -9999.000000   -9999.000000       0.301000
57439     57439     hubei          108.9197       30.2700          119       156     2012      03        11        071              0.275792       5.121368       0.129906       0.275747       0.065000       0.066100       0.039600   -9999.000000
57439     57439     hubei          108.9197       30.2700          119       156     2012      03        12        072              0.271667       5.189819       1.241562       0.271830   -9999.000000       0.050800       0.052700       0.269000
57439     57439     hubei          108.9197       30.2700          119       156     2012      03        13        073              0.267783       5.675781       0.000000       0.269233   -9999.000000   -9999.000000       0.051400   -9999.000000
57439     57439     hubei          108.9197       30.2700          119       156     2012      03        14        074              0.262667       9.364594       0.000000       0.266141       0.070500   -9999.000000   -9999.000000       0.336000
57439     57439     hubei          108.9197       30.2700          119       156     2012      03        15        075              0.259292       7.626892       0.000000       0.266480       0.069000   -9999.000000   -9999.000000   -9999.000000
57439     57439     hubei          108.9197       30.2700          119       156     2012      03        16        076              0.356913       7.921356       0.000000       0.266755       0.068000       0.190400   -9999.000000   -9999.000000
57439     57439     hubei          108.9197       30.2700          119       156     2012      03        17        077              0.431957       9.862915       0.000000       0.266103   -9999.000000   -9999.000000       0.049700       0.318000
57439     57439     hubei          108.9197       30.2700          119       156     2012      03        18        078              0.429625      11.636536       0.674173       0.264372       0.067000   -9999.000000       0.053400   -9999.000000
57439     57439     hubei          108.9197       30.2700          119       156     2012      03        19        079              0.428250      14.714661       5.852528       0.261657       0.070000       0.043000       0.057000       0.395000
57439     57439     hubei          108.9197       30.2700          119       156     2012      03        20        080              0.427304      14.004944       0.076128       0.261947       0.064500   -9999.000000       0.060100   -9999.000000
57439     57439     hubei          108.9197       30.2700          119       156     2012      03        21        081              0.430500      12.820801      10.835289       0.261225       0.092000       0.211700   -9999.000000   -9999.000000
57439     57439     hubei          108.9197       30.2700          119       156     2012      03        22        082              0.440917      10.911407      15.313853       0.278209   -9999.000000   -9999.000000   -9999.000000       0.831000
57439     57439     hubei          108.9197       30.2700          119       156     2012      03        23        083              0.439292       8.638580       0.717380       0.308150   -9999.000000   -9999.000000       0.059200   -9999.000000
57439     57439     hubei          108.9197       30.2700          119       156     2012      03        24        084              0.436708       8.694885       0.000000       0.294232       0.082500       0.033800       0.057500       0.373000
57439     57439     hubei          108.9197       30.2700          119       156     2012      03        25        085              0.000000      11.354797       0.000000       0.280314       0.082500   -9999.000000       0.059900   -9999.000000
57439     57439     hubei          108.9197       30.2700          119       156     2012      03        26        086              0.427625      13.319794       0.225228       0.272917       0.083000   -9999.000000   -9999.000000   -9999.000000
57439     57439     hubei          108.9197       30.2700          119       156     2012      03        27        087              0.424917      13.661102       2.853014       0.269137   -9999.000000   -9999.000000   -9999.000000       0.438000
57439     57439     hubei          108.9197       30.2700          119       156     2012      03        28        088              0.433083      12.345551       5.020946       0.275181   -9999.000000   -9999.000000       0.089900   -9999.000000
57439     57439     hubei          108.9197       30.2700          119       156     2012      03        29        089              0.440542      11.015564      23.191126       0.286705   -9999.000000       0.072600       0.089700       0.924000
57439     57439     hubei          108.9197       30.2700          119       156     2012      03        30        090              0.442167      12.077087       8.419201       0.309978   -9999.000000       0.115300       0.089000   -9999.000000
57439     57439     hubei          108.9197       30.2700          119       156     2012      03        31        091              0.439083       9.770569       0.000000       0.313214       0.088000   -9999.000000       0.084100       0.467000
57439     57439     hubei          108.9197       30.2700          119       156     2012      04        01        092              0.435792      11.843597       0.000000       0.290273       0.075000   -9999.000000   -9999.000000   -9999.000000
57439     57439     hubei          108.9197       30.2700          119       156     2012      04        02        093              0.430042      14.515656       0.000000       0.280384   -9999.000000   -9999.000000   -9999.000000   -9999.000000
57439     57439     hubei          108.9197       30.2700          119       156     2012      04        03        094              0.427083      16.969635       8.162872       0.274085       0.080000   -9999.000000       0.077000       0.383000
57439     57439     hubei          108.9197       30.2700          119       156     2012      04        04        095              0.438583      12.222107       2.126129       0.280470       0.083000       0.150200       0.079100   -9999.000000
57439     57439     hubei          108.9197       30.2700          119       156     2012      04        05        096              0.436792      10.745667       0.316356       0.295255       0.078000   -9999.000000       0.072900       0.471000
57439     57439     hubei          108.9197       30.2700          119       156     2012      04        06        097              0.435375      12.831207       0.080953       0.282033       0.072000       0.152500       0.074200   -9999.000000
57439     57439     hubei          108.9197       30.2700          119       156     2012      04        07        098              0.434292      13.428131       0.794115       0.277560   -9999.000000   -9999.000000   -9999.000000       0.444000
57439     57439     hubei          108.9197       30.2700          119       156     2012      04        08        099              0.435250      12.313110       2.407935       0.277055   -9999.000000   -9999.000000   -9999.000000       0.566000
57439     57439     hubei          108.9197       30.2700          119       156     2012      04        09        100              0.439083      12.204163       0.940178       0.280231       0.084500   -9999.000000       0.052500   -9999.000000
57439     57439     hubei          108.9197       30.2700          119       156     2012      04        10        101              0.441208      12.210175       8.330679       0.283507       0.076500   -9999.000000       0.078500       0.598000
57439     57439     hubei          108.9197       30.2700          119       156     2012      04        11        102              0.441542      13.793152      15.779067       0.297829       0.110000       0.083100       0.079700   -9999.000000
57439     57439     hubei          108.9197       30.2700          119       156     2012      04        12        103              0.444750      13.730072      21.661236       0.307370   -9999.000000   -9999.000000   -9999.000000       0.889000
57439     57439     hubei          108.9197       30.2700          119       156     2012      04        13        104              0.442458      12.178375       3.050240       0.326680       0.121000       0.093300   -9999.000000   -9999.000000
57439     57439     hubei          108.9197       30.2700          119       156     2012      04        14        105              0.442208      10.599762       1.249185       0.302517       0.099500   -9999.000000       0.081400   -9999.000000
57439     57439     hubei          108.9197       30.2700          119       156     2012      04        15        106              0.441208      12.134796       0.397494       0.295521       0.104000   -9999.000000       0.076400       0.676000
57439     57439     hubei          108.9197       30.2700          119       156     2012      04        16        107              0.439208      12.253998       0.403766       0.290288       0.097500       0.143300       0.095500   -9999.000000
57439     57439     hubei          108.9197       30.2700          119       156     2012      04        17        108              0.442417      11.422424       4.039809       0.289244       0.099000   -9999.000000       0.093800       0.543000
57439     57439     hubei          108.9197       30.2700          119       156     2012      04        18        109              0.439375      10.614105       0.159469       0.294690   -9999.000000   -9999.000000   -9999.000000   -9999.000000
57439     57439     hubei          108.9197       30.2700          119       156     2012      04        19        110              0.439333      14.755249       9.694842       0.284921   -9999.000000   -9999.000000   -9999.000000   -9999.000000
57439     57439     hubei          108.9197       30.2700          119       156     2012      04        20        111              0.442583      15.149902       5.552882       0.294215       0.102000   -9999.000000       0.092500       0.592000
57439     57439     hubei          108.9197       30.2700          119       156     2012      04        21        112              0.439083      14.623138       0.000000       0.303755       0.147000       0.214800       0.092800   -9999.000000
57439     57439     hubei          108.9197       30.2700          119       156     2012      04        22        113              0.432292      17.100464       1.362293       0.291311       0.126000       0.171000   -9999.000000       0.586000
57439     57439     hubei          108.9197       30.2700          119       156     2012      04        23        114              0.430208      18.915344      36.166603       0.284377   -9999.000000   -9999.000000       0.130200   -9999.000000
57439     57439     hubei          108.9197       30.2700          119       156     2012      04        24        115              0.441083      17.137421       5.326001       0.305095       0.156000       0.260600   -9999.000000       0.800000
57439     57439     hubei          108.9197       30.2700          119       156     2012      04        25        116              0.000000      16.809265       0.574951       0.316875       0.154500   -9999.000000   -9999.000000       0.516000
57439     57439     hubei          108.9197       30.2700          119       156     2012      04        26        117              0.433750      16.051819       0.000000       0.301830       0.142000       0.191900       0.126500   -9999.000000
57439     57439     hubei          108.9197       30.2700          119       156     2012      04        27        118              0.422333      17.609467       0.000000       0.291515       0.127000   -9999.000000       0.120200       0.488000
57439     57439     hubei          108.9197       30.2700          119       156     2012      04        28        119              0.432417      19.036743      10.369580       0.287014   -9999.000000   -9999.000000       0.135700   -9999.000000
57439     57439     hubei          108.9197       30.2700          119       156     2012      04        29        120              0.435708      15.645325      12.542162       0.308009   -9999.000000       0.197100   -9999.000000       0.581000
57439     57439     hubei          108.9197       30.2700          119       156     2012      04        30        121              0.439042      16.639008       1.733154       0.302547       0.157500   -9999.000000   -9999.000000   -9999.000000
57439     57439     hubei          108.9197       30.2700          119       156     2012      05        01        122              0.443167      17.036957       9.050567       0.306144       0.168500       0.245700       0.086900   -9999.000000
57439     57439     hubei          108.9197       30.2700          119       156     2012      05        02        123              0.440792      16.298645       0.151767       0.311454       0.171000       0.263600       0.076500       0.590000
57439     57439     hubei          108.9197       30.2700          119       156     2012      05        03        124              0.443292      16.552460       3.025154       0.298335   -9999.000000   -9999.000000       0.080100   -9999.000000
57439     57439     hubei          108.9197       30.2700          119       156     2012      05        04        125              0.440875      16.585114       1.127072       0.299640   -9999.000000       0.180200       0.077200       0.725000
57439     57439     hubei          108.9197       30.2700          119       156     2012      05        05        126              0.435083      18.371796       0.342955       0.295636       0.134500   -9999.000000   -9999.000000   -9999.000000
57439     57439     hubei          108.9197       30.2700          119       156     2012      05        06        127              0.433208      20.044189       1.298513       0.289747       0.157000       0.122000   -9999.000000       0.659000
57439     57439     hubei          108.9197       30.2700          119       156     2012      05        07        128              0.432500      18.924347       4.796520       0.291309   -9999.000000   -9999.000000       0.066800       0.834000
57439     57439     hubei          108.9197       30.2700          119       156     2012      05        08        129              0.437958      20.865540       9.819098       0.295149   -9999.000000   -9999.000000       0.064600   -9999.000000
57439     57439     hubei          108.9197       30.2700          119       156     2012      05        09        130              0.442167      21.078827       0.571856       0.302735   -9999.000000   -9999.000000       0.070800       0.820000
57439     57439     hubei          108.9197       30.2700          119       156     2012      05        10        131              0.440125      19.817078       0.000000       0.300444       0.136000   -9999.000000       0.064500   -9999.000000
57439     57439     hubei          108.9197       30.2700          119       156     2012      05        11        132              0.444083      21.090729      14.872103       0.289644       0.144000       0.179400   -9999.000000       1.000000
57439     57439     hubei          108.9197       30.2700          119       156     2012      05        12        133              0.446250      19.050812       7.014957       0.312632       0.184000       0.290600   -9999.000000   -9999.000000
57439     57439     hubei          108.9197       30.2700          119       156     2012      05        13        134              0.446417      17.267029      18.179314       0.308315   -9999.000000   -9999.000000       0.072600   -9999.000000
57439     57439     hubei          108.9197       30.2700          119       156     2012      05        14        135              0.445750      16.341461       4.835118       0.314081   -9999.000000   -9999.000000       0.126900       0.751000
57439     57439     hubei          108.9197       30.2700          119       156     2012      05        15        136              0.442167      15.421448       0.000000       0.312372       0.144000       0.339900       0.128300   -9999.000000
57439     57439     hubei          108.9197       30.2700          119       156     2012      05        16        137              0.440083      17.317535       0.000000       0.298526       0.138500   -9999.000000   -9999.000000       0.536000
57439     57439     hubei          108.9197       30.2700          119       156     2012      05        17        138              0.435125      18.379272       1.679973       0.293640       0.137000       0.299700   -9999.000000   -9999.000000
57439     57439     hubei          108.9197       30.2700          119       156     2012      05        18        139              0.443125      18.975891       8.525192       0.290686       0.187000   -9999.000000       0.126200   -9999.000000
57439     57439     hubei          108.9197       30.2700          119       156     2012      05        19        140              0.440750      16.770294       0.000000       0.307727   -9999.000000       0.063000       0.125500       0.704000
57439     57439     hubei          108.9197       30.2700          119       156     2012      05        20        141              0.433250      20.935364       0.000000       0.290999   -9999.000000   -9999.000000       0.122500   -9999.000000
57439     57439     hubei          108.9197       30.2700          119       156     2012      05        21        142              0.432500      20.961365       3.174183       0.285797       0.295000   -9999.000000       0.084100       0.784000
57439     57439     hubei          108.9197       30.2700          119       156     2012      05        22        143              0.444167      18.969452       8.837864       0.290009       0.295000       0.202700   -9999.000000   -9999.000000
57439     57439     hubei          108.9197       30.2700          119       156     2012      05        23        144              0.445708      16.680237       9.983768       0.305994   -9999.000000   -9999.000000   -9999.000000       0.785000
57439     57439     hubei          108.9197       30.2700          119       156     2012      05        24        145              0.445083      16.126282      11.129775       0.309294   -9999.000000       0.177400       0.090100       0.786000
57439     57439     hubei          108.9197       30.2700          119       156     2012      05        25        146              0.000000      15.310303       5.362275       0.313837   -9999.000000   -9999.000000       0.091100   -9999.000000
57439     57439     hubei          108.9197       30.2700          119       156     2012      05        26        147              0.442292      15.247711       2.538747       0.306726       0.236000   -9999.000000       0.084600       0.564000
57439     57439     hubei          108.9197       30.2700          119       156     2012      05        27        148              0.440250      17.411194       0.137930       0.296168       0.250000       0.226000       0.085700   -9999.000000
57439     57439     hubei          108.9197       30.2700          119       156     2012      05        28        149              0.442375      18.568878      34.448009       0.292000       0.278000       0.140800   -9999.000000       0.921000
57439     57439     hubei          108.9197       30.2700          119       156     2012      05        29        150              0.445458      18.497803      14.783409       0.317869       0.269000   -9999.000000   -9999.000000   -9999.000000
57439     57439     hubei          108.9197       30.2700          119       156     2012      05        30        151              0.441125      17.626495       0.000000       0.326429   -9999.000000   -9999.000000       0.077900   -9999.000000
57439     57439     hubei          108.9197       30.2700          119       156     2012      05        31        152              0.439167      18.878601       0.554848       0.307382       0.233000   -9999.000000       0.079600   -9999.000000
57439     57439     hubei          108.9197       30.2700          119       156     2012      06        01        153              0.439500      17.880554       0.578941       0.303410       0.191500   -9999.000000       0.084000   -9999.000000
57439     57439     hubei          108.9197       30.2700          119       156     2012      06        02        154              0.433250      18.062653       1.247715       0.300968       0.173000       0.248000   -9999.000000       0.550000
57439     57439     hubei          108.9197       30.2700          119       156     2012      06        03        155              0.443208      19.654022       6.801304       0.295538       0.232000   -9999.000000   -9999.000000   -9999.000000
57439     57439     hubei          108.9197       30.2700          119       156     2012      06        04        156              0.441667      17.495575       0.178983       0.305675   -9999.000000       0.186300       0.062700       0.563000
57439     57439     hubei          108.9197       30.2700          119       156     2012      06        05        157              0.444250      18.369751       4.310113       0.294941       0.195000   -9999.000000       0.068900       0.703000
57439     57439     hubei          108.9197       30.2700          119       156     2012      06        06        158              0.443042      17.552155       0.225941       0.299495       0.194000       0.095900       0.063000   -9999.000000
57439     57439     hubei          108.9197       30.2700          119       156     2012      06        07        159              0.442667      18.283875       0.713355       0.292861       0.192500   -9999.000000       0.065200       0.713000
57439     57439     hubei          108.9197       30.2700          119       156     2012      06        08        160              0.440792      17.628845       0.191085       0.292568       0.165000   -9999.000000   -9999.000000   -9999.000000
57439     57439     hubei          108.9197       30.2700          119       156     2012      06        09        161              0.440000      20.076141       4.012295       0.288733   -9999.000000       0.202800   -9999.000000       0.843000
57439     57439     hubei          108.9197       30.2700          119       156     2012      06        10        162              0.444833      19.653900       5.930058       0.296815       0.169000   -9999.000000       0.060000   -9999.000000
57439     57439     hubei          108.9197       30.2700          119       156     2012      06        11        163              0.000000      18.965942       0.325905       0.302517       0.141500   -9999.000000       0.168900   -9999.000000
57439     57439     hubei          108.9197       30.2700          119       156     2012      06        12        164              0.441333      19.781830       0.066869       0.292293       0.137500       0.330900       0.158600       0.579000
57439     57439     hubei          108.9197       30.2700          119       156     2012      06        13        165              0.436208      21.653412       0.105852       0.286816       0.140500   -9999.000000   -9999.000000   -9999.000000
57439     57439     hubei          108.9197       30.2700          119       156     2012      06        14        166              0.434458      21.430237       0.043500       0.284934       0.139000   -9999.000000   -9999.000000       0.469000
57439     57439     hubei          108.9197       30.2700          119       156     2012      06        15        167              0.437250      20.496521      10.580648       0.284601   -9999.000000       0.121900       0.163500   -9999.000000
57439     57439     hubei          108.9197       30.2700          119       156     2012      06        16        168              0.441875      21.691315       0.143880       0.297826       0.133000       0.059100       0.153300   -9999.000000
57439     57439     hubei          108.9197       30.2700          119       156     2012      06        17        169              0.439833      20.927002       0.000000       0.291996       0.135000   -9999.000000       0.161700       0.563000
57439     57439     hubei          108.9197       30.2700          119       156     2012      06        18        170              0.438167      20.981598       0.875786       0.284765       0.134500   -9999.000000       0.178600   -9999.000000
57439     57439     hubei          108.9197       30.2700          119       156     2012      06        19        171              0.435292      22.163696       0.000000       0.282223       0.125000       0.235000   -9999.000000       0.545000
57439     57439     hubei          108.9197       30.2700          119       156     2012      06        20        172              0.431667      23.116272       0.000000       0.277981   -9999.000000       0.159200   -9999.000000   -9999.000000
57439     57439     hubei          108.9197       30.2700          119       156     2012      06        21        173              0.433417      23.253754       9.255386       0.275704       0.158000   -9999.000000       0.176300       0.727000
57439     57439     hubei          108.9197       30.2700          119       156     2012      06        22        174              0.440250      22.591888       0.952927       0.290312       0.161500       0.246900       0.180500       0.483000
57439     57439     hubei          108.9197       30.2700          119       156     2012      06        23        175              0.438917      23.196014       2.614074       0.286622       0.154000   -9999.000000       0.168900   -9999.000000
57439     57439     hubei          108.9197       30.2700          119       156     2012      06        24        176              0.438917      23.495483       4.934662       0.284661       0.149000       0.108600       0.167100       0.681000
57439     57439     hubei          108.9197       30.2700          119       156     2012      06        25        177              0.441917      23.443329       3.326129       0.285758   -9999.000000   -9999.000000   -9999.000000   -9999.000000
57439     57439     hubei          108.9197       30.2700          119       156     2012      06        26        178              0.442542      22.082947       0.185334       0.288089       0.172000   -9999.000000   -9999.000000       0.717000
57439     57439     hubei          108.9197       30.2700          119       156     2012      06        27        179              0.441083      21.729126       2.390790       0.284735       0.191000       0.137700       0.107400   -9999.000000
57439     57439     hubei          108.9197       30.2700          119       156     2012      06        28        180              0.442958      22.325012       1.454241       0.281777       0.186000   -9999.000000       0.110500   -9999.000000
57439     57439     hubei          108.9197       30.2700          119       156     2012      06        29        181              0.441583      22.642700       1.636615       0.281882       0.164000       0.150500       0.105800       0.885000
57439     57439     hubei          108.9197       30.2700          119       156     2012      06        30        182              0.440833      24.402588       2.381178       0.280085   -9999.000000   -9999.000000   -9999.000000   -9999.000000
57439     57439     hubei          108.9197       30.2700          119       156     2012      07        01        183              0.440364      24.394226       1.534780       0.280193   -9999.000000   -9999.000000   -9999.000000       0.748000
57439     57439     hubei          108.9197       30.2700          119       156     2012      07        02        184              0.440250      23.877258       0.000000       0.279355       0.137500       0.065100       0.059400   -9999.000000
57439     57439     hubei          108.9197       30.2700          119       156     2012      07        03        185              0.439458      24.282257       0.797449       0.272302       0.154000       0.185000       0.054800       0.560000
57439     57439     hubei          108.9197       30.2700          119       156     2012      07        04        186              0.443833      23.686768      26.265453       0.269192       0.155000       0.079800       0.062300       0.667000
57439     57439     hubei          108.9197       30.2700          119       156     2012      07        05        187              0.444000      23.159882       0.514839       0.300184       0.152000   -9999.000000       0.058300   -9999.000000
57439     57439     hubei          108.9197       30.2700          119       156     2012      07        06        188              0.441583      23.432281       0.557018       0.301829   -9999.000000   -9999.000000   -9999.000000       0.751000
57439     57439     hubei          108.9197       30.2700          119       156     2012      07        07        189              0.441125      24.665558       0.000000       0.285613   -9999.000000       0.208100   -9999.000000   -9999.000000
57439     57439     hubei          108.9197       30.2700          119       156     2012      07        08        190              0.440667      24.757111       0.000000       0.277759       0.144000       0.189200       0.052400       0.562000
57439     57439     hubei          108.9197       30.2700          119       156     2012      07        09        191              0.439708      25.511200       0.000000       0.271479       0.146000   -9999.000000       0.063500   -9999.000000
57439     57439     hubei          108.9197       30.2700          119       156     2012      07        10        192              0.445125      24.849609      32.924500       0.269059       0.155000       0.158300       0.060100   -9999.000000
57439     57439     hubei          108.9197       30.2700          119       156     2012      07        11        193              0.448125      24.648560      28.175900       0.305042   -9999.000000   -9999.000000       0.062200       1.000000
57439     57439     hubei          108.9197       30.2700          119       156     2012      07        12        194              0.447750      23.395874      23.724487       0.331493   -9999.000000       0.174200   -9999.000000   -9999.000000
57439     57439     hubei          108.9197       30.2700          119       156     2012      07        13        195              0.447043      22.972870       8.128167       0.327924       0.247000       0.209800   -9999.000000       0.959000
57439     57439     hubei          108.9197       30.2700          119       156     2012      07        14        196              0.443000      21.913727       0.280538       0.316523       0.231500   -9999.000000       0.058000   -9999.000000
57439     57439     hubei          108.9197       30.2700          119       156     2012      07        15        197              0.441583      23.911011       0.117364       0.298476       0.222000       0.223000       0.062400   -9999.000000
57439     57439     hubei          108.9197       30.2700          119       156     2012      07        16        198              0.440458      23.834442       0.000000       0.294413   -9999.000000   -9999.000000       0.075300       0.553000
57439     57439     hubei          108.9197       30.2700          119       156     2012      07        17        199              0.441292      23.202454      11.416639       0.290986   -9999.000000       0.081100   -9999.000000   -9999.000000
57439     57439     hubei          108.9197       30.2700          119       156     2012      07        18        200              0.446250      22.528564      24.610735       0.298492       0.258000   -9999.000000   -9999.000000       0.919000
57439     57439     hubei          108.9197       30.2700          119       156     2012      07        19        201              0.445208      21.334961       2.449528       0.327477       0.260500   -9999.000000       0.074300   -9999.000000
57439     57439     hubei          108.9197       30.2700          119       156     2012      07        20        202              0.443167      22.930756       1.215871       0.306736       0.226500       0.226200       0.073500       0.714000
57439     57439     hubei          108.9197       30.2700          119       156     2012      07        21        203              0.441826      24.781616       0.000000       0.300023       0.268000       0.165500       0.072400       0.713000
57439     57439     hubei          108.9197       30.2700          119       156     2012      07        22        204              0.441958      25.348419       4.367323       0.294185   -9999.000000       0.144900       0.061300   -9999.000000
57439     57439     hubei          108.9197       30.2700          119       156     2012      07        23        205              0.442208      24.989532       2.843575       0.296269       0.290000       0.142100   -9999.000000       0.989000
57439     57439     hubei          108.9197       30.2700          119       156     2012      07        24        206              0.441000      24.863953       0.382956       0.297266       0.308000   -9999.000000   -9999.000000   -9999.000000
57439     57439     hubei          108.9197       30.2700          119       156     2012      07        25        207              0.439833      24.629761       0.000000       0.290522       0.291500   -9999.000000       0.076900       0.657000
57439     57439     hubei          108.9197       30.2700          119       156     2012      07        26        208              0.437917      24.952911       0.230666       0.286114       0.252000   -9999.000000       0.080200   -9999.000000
57439     57439     hubei          108.9197       30.2700          119       156     2012      07        27        209              0.434500      25.416931       0.131571       0.283020   -9999.000000   -9999.000000       0.075800   -9999.000000
57439     57439     hubei          108.9197       30.2700          119       156     2012      07        28        210              0.435875      25.608826       2.743380       0.280422       0.267000       0.138800       0.075400       0.726000
57439     57439     hubei          108.9197       30.2700          119       156     2012      07        29        211              0.441500      25.695068       4.008571       0.284716       0.235500   -9999.000000   -9999.000000   -9999.000000
57439     57439     hubei          108.9197       30.2700          119       156     2012      07        30        212              0.442667      25.453369       1.292070       0.290852       0.266500   -9999.000000   -9999.000000       0.680000
57439     57439     hubei          108.9197       30.2700          119       156     2012      07        31        213              0.444125      26.398132       8.090694       0.285318       0.276000   -9999.000000       0.116600   -9999.000000
57439     57439     hubei          108.9197       30.2700          119       156     2012      08        01        214              0.444500      25.539398      14.288864       0.296791       0.186000   -9999.000000       0.121200       0.697000
57439     57439     hubei          108.9197       30.2700          119       156     2012      08        02        215              0.444875      25.205383       2.529860       0.303858   -9999.000000       0.274500       0.113000       0.833000
57439     57439     hubei          108.9197       30.2700          119       156     2012      08        03        216              0.442333      25.083649       0.000000       0.300354       0.207000   -9999.000000   -9999.000000   -9999.000000
57439     57439     hubei          108.9197       30.2700          119       156     2012      08        04        217              0.439333      25.966370       0.099184       0.285574       0.206000   -9999.000000   -9999.000000       0.617000
57439     57439     hubei          108.9197       30.2700          119       156     2012      08        05        218              0.437458      26.044678       1.892950       0.278509       0.226000   -9999.000000       0.113100   -9999.000000
57439     57439     hubei          108.9197       30.2700          119       156     2012      08        06        219              0.435625      24.209778       0.615336       0.280590       0.200000   -9999.000000       0.131800       0.694000
57439     57439     hubei          108.9197       30.2700          119       156     2012      08        07        220              0.433250      25.139526       7.613045       0.277761   -9999.000000       0.103900       0.125000   -9999.000000
57439     57439     hubei          108.9197       30.2700          119       156     2012      08        08        221              0.440167      25.396820       0.000000       0.282773       0.190000   -9999.000000       0.128700   -9999.000000
57439     57439     hubei          108.9197       30.2700          119       156     2012      08        09        222              0.434667      26.047241       0.000000       0.285205       0.209000   -9999.000000   -9999.000000       0.621000
57439     57439     hubei          108.9197       30.2700          119       156     2012      08        10        223              0.428792      25.998260       0.000000       0.274320       0.198500   -9999.000000   -9999.000000   -9999.000000
57439     57439     hubei          108.9197       30.2700          119       156     2012      08        11        224              0.423375      26.264038       0.365418       0.269251       0.187500   -9999.000000       0.128900       0.589000
57439     57439     hubei          108.9197       30.2700          119       156     2012      08        12        225              0.422792      26.743835       0.704512       0.266973   -9999.000000       0.323600       0.137400   -9999.000000
57439     57439     hubei          108.9197       30.2700          119       156     2012      08        13        226              0.426500      27.224304       5.162641       0.264649   -9999.000000       0.101000       0.152800   -9999.000000
57439     57439     hubei          108.9197       30.2700          119       156     2012      08        14        227              0.421917      26.288513       4.363982       0.275190       0.197000   -9999.000000   -9999.000000       0.539000
57439     57439     hubei          108.9197       30.2700          119       156     2012      08        15        228              0.421792      26.650574      15.675751       0.269331       0.202000       0.130000   -9999.000000   -9999.000000
57439     57439     hubei          108.9197       30.2700          119       156     2012      08        16        229              0.431042      25.917206       0.893919       0.292052       0.195000   -9999.000000       0.156900       0.640000
57439     57439     hubei          108.9197       30.2700          119       156     2012      08        17        230              0.425917      26.299194       0.000000       0.284939       0.162000   -9999.000000       0.149500   -9999.000000
57439     57439     hubei          108.9197       30.2700          119       156     2012      08        18        231              0.419250      26.576660       0.334706       0.271516   -9999.000000   -9999.000000       0.154700       0.550000
57439     57439     hubei          108.9197       30.2700          119       156     2012      08        19        232              0.414625      26.695831       0.635455       0.265194       0.190000   -9999.000000       0.147700       0.572000
57439     57439     hubei          108.9197       30.2700          119       156     2012      08        20        233              0.418667      26.473785      41.411274       0.259782       0.216000       0.180500   -9999.000000   -9999.000000
57439     57439     hubei          108.9197       30.2700          119       156     2012      08        21        234              0.434333      26.068817       8.485675       0.296228       0.261000   -9999.000000   -9999.000000       1.000000
57439     57439     hubei          108.9197       30.2700          119       156     2012      08        22        235              0.432583      21.646118       0.182636       0.315114       0.208000       0.079700       0.167500   -9999.000000
57439     57439     hubei          108.9197       30.2700          119       156     2012      08        23        236              0.428667      21.731873       0.000000       0.291152   -9999.000000   -9999.000000       0.176200       0.434000
57439     57439     hubei          108.9197       30.2700          119       156     2012      08        24        237              0.422083      21.912811       0.000000       0.281138   -9999.000000   -9999.000000       0.160100   -9999.000000
57439     57439     hubei          108.9197       30.2700          119       156     2012      08        25        238              0.000000      22.584106       0.443507       0.275189       0.193000       0.151100       0.167700   -9999.000000
57439     57439     hubei          108.9197       30.2700          119       156     2012      08        26        239              0.413042      23.269043       0.408340       0.272296       0.224000       0.095400   -9999.000000       0.589000
57439     57439     hubei          108.9197       30.2700          119       156     2012      08        27        240              0.410917      22.555695       0.000000       0.273857       0.198500       0.040700   -9999.000000   -9999.000000
57439     57439     hubei          108.9197       30.2700          119       156     2012      08        28        241              0.410583      23.801819       3.284457       0.269279       0.169000   -9999.000000       0.143900       0.562000
57439     57439     hubei          108.9197       30.2700          119       156     2012      08        29        242              0.410417      23.394531       0.188158       0.276864   -9999.000000   -9999.000000       0.151100   -9999.000000
57439     57439     hubei          108.9197       30.2700          119       156     2012      08        30        243              0.422417      24.216766       9.787985       0.270735       0.236000       0.195500       0.151900       0.878000
57439     57439     hubei          108.9197       30.2700          119       156     2012      08        31        244              0.428167      23.067352       3.901862       0.292790       0.233000       0.204600   -9999.000000       0.749000
57439     57439     hubei          108.9197       30.2700          119       156     2012      09        01        245              0.432000      22.889557       8.991145       0.283532       0.197000   -9999.000000   -9999.000000   -9999.000000
57439     57439     hubei          108.9197       30.2700          119       156     2012      09        02        246              0.433583      24.156433       2.468040       0.293754   -9999.000000       0.214800       0.155000       0.791000
57439     57439     hubei          108.9197       30.2700          119       156     2012      09        03        247              0.431292      21.040283       0.000000       0.294623   -9999.000000   -9999.000000       0.136800   -9999.000000
57439     57439     hubei          108.9197       30.2700          119       156     2012      09        04        248              0.427958      22.062653       0.000000       0.279929       0.190000   -9999.000000       0.143400       0.407000
57439     57439     hubei          108.9197       30.2700          119       156     2012      09        05        249              0.421167      21.671936       0.000000       0.273677       0.209500       0.309100       0.134700   -9999.000000
57439     57439     hubei          108.9197       30.2700          119       156     2012      09        06        250              0.414375      21.538208       0.321184       0.268663       0.205500   -9999.000000   -9999.000000   -9999.000000
57439     57439     hubei          108.9197       30.2700          119       156     2012      09        07        251              0.411458      22.308838       4.638195       0.266179       0.215500       0.109100   -9999.000000       0.590000
57439     57439     hubei          108.9197       30.2700          119       156     2012      09        08        252              0.411583      23.068176       5.818697       0.265476   -9999.000000   -9999.000000       0.142300   -9999.000000
57439     57439     hubei          108.9197       30.2700          119       156     2012      09        09        253              0.412792      22.635681       0.209113       0.281637   -9999.000000   -9999.000000       0.149800       0.692000
57439     57439     hubei          108.9197       30.2700          119       156     2012      09        10        254              0.412042      22.482178       0.489541       0.274557       0.258000       0.298100       0.139800   -9999.000000
57439     57439     hubei          108.9197       30.2700          119       156     2012      09        11        255              0.426208      21.108643      32.334343       0.271029   -9999.000000   -9999.000000       0.135000   -9999.000000
57439     57439     hubei          108.9197       30.2700          119       156     2012      09        12        256              0.436083      20.729095      16.451208       0.311494   -9999.000000       0.260300   -9999.000000       1.000000
57439     57439     hubei          108.9197       30.2700          119       156     2012      09        13        257              0.432739      18.079346       0.000000       0.320474       0.176000       0.148100   -9999.000000   -9999.000000
57439     57439     hubei          108.9197       30.2700          119       156     2012      09        14        258              0.430292      19.306335       0.000000       0.292153   -9999.000000       0.133400       0.135600       0.488000
57439     57439     hubei          108.9197       30.2700          119       156     2012      09        15        259              0.427167      19.157288       0.946787       0.284277       0.172000       0.323800       0.139000   -9999.000000
57439     57439     hubei          108.9197       30.2700          119       156     2012      09        16        260              0.423708      18.821228       0.229187       0.280132       0.186000   -9999.000000       0.140000       0.371000
57439     57439     hubei          108.9197       30.2700          119       156     2012      09        17        261              0.419042      17.163788       0.000000       0.279178       0.181500       0.176300   -9999.000000       0.294000
57439     57439     hubei          108.9197       30.2700          119       156     2012      09        18        262              0.414500      18.080048       0.000000       0.276881       0.182000   -9999.000000   -9999.000000   -9999.000000
57439     57439     hubei          108.9197       30.2700          119       156     2012      09        19        263              0.411458      18.609344       0.000000       0.275302   -9999.000000   -9999.000000       0.159000       0.417000
57439     57439     hubei          108.9197       30.2700          119       156     2012      09        20        264              0.410125      19.570129       1.991535       0.273004   -9999.000000       0.255000       0.162000   -9999.000000
57439     57439     hubei          108.9197       30.2700          119       156     2012      09        21        265              0.411875      18.727997       1.296490       0.275268   -9999.000000   -9999.000000       0.163000       0.709000
57439     57439     hubei          108.9197       30.2700          119       156     2012      09        22        266              0.413083      18.113159       0.678642       0.278594       0.188000   -9999.000000       0.161500   -9999.000000
57439     57439     hubei          108.9197       30.2700          119       156     2012      09        23        267              0.414583      18.807526       0.343568       0.276618       0.179000   -9999.000000   -9999.000000   -9999.000000
57439     57439     hubei          108.9197       30.2700          119       156     2012      09        24        268              0.415417      18.440094       0.000000       0.275991       0.164000   -9999.000000   -9999.000000       0.530000
57439     57439     hubei          108.9197       30.2700          119       156     2012      09        25        269              0.422083      18.611542      10.840713       0.273712   -9999.000000       0.111300       0.095100   -9999.000000
57439     57439     hubei          108.9197       30.2700          119       156     2012      09        26        270              0.431333      17.647095       4.754826       0.291161       0.186000   -9999.000000       0.092800       0.835000
57439     57439     hubei          108.9197       30.2700          119       156     2012      09        27        271              0.430857      17.530060       0.000000       0.298433       0.167500       0.100000       0.089600   -9999.000000
57439     57439     hubei          108.9197       30.2700          119       156     2012      09        28        272              0.429250      18.849792       0.096317       0.284669       0.158000   -9999.000000       0.086400       0.521000
57439     57439     hubei          108.9197       30.2700          119       156     2012      09        29        273              0.430292      19.185455      14.753938       0.278394       0.166000   -9999.000000   -9999.000000       0.586000
57439     57439     hubei          108.9197       30.2700          119       156     2012      09        30        274              0.431458      18.636963       0.726126       0.295378   -9999.000000       0.353300   -9999.000000   -9999.000000
57439     57439     hubei          108.9197       30.2700          119       156     2012      10        01        275              0.429958      16.530090       2.000932       0.297388       0.122000   -9999.000000       0.066100       0.535000
57439     57439     hubei          108.9197       30.2700          119       156     2012      10        02        276              0.431208      18.377289       6.210169       0.284396       0.150000       0.037400       0.079400   -9999.000000
57439     57439     hubei          108.9197       30.2700          119       156     2012      10        03        277              0.431042      16.161743       0.258468       0.293470       0.142500   -9999.000000       0.075900       0.601000
57439     57439     hubei          108.9197       30.2700          119       156     2012      10        04        278              0.432625      15.076935       7.238737       0.288712       0.164000   -9999.000000   -9999.000000   -9999.000000
57439     57439     hubei          108.9197       30.2700          119       156     2012      10        05        279              0.433125      14.664368       3.687103       0.297202       0.151000       0.299000   -9999.000000   -9999.000000
57439     57439     hubei          108.9197       30.2700          119       156     2012      10        06        280              0.431833      14.650848       2.931965       0.297811   -9999.000000       0.108400       0.076700       0.647000
57439     57439     hubei          108.9197       30.2700          119       156     2012      10        07        281              0.433750      14.712494       6.167805       0.290821       0.160000   -9999.000000       0.079200   -9999.000000
57439     57439     hubei          108.9197       30.2700          119       156     2012      10        08        282              0.433208      13.898926       2.626055       0.298717       0.161500   -9999.000000       0.052900       0.776000
57439     57439     hubei          108.9197       30.2700          119       156     2012      10        09        283              0.431375      14.217712       0.000000       0.297494       0.140000   -9999.000000       0.052200   -9999.000000
57439     57439     hubei          108.9197       30.2700          119       156     2012      10        10        284              0.430875      15.285339       0.000000       0.287357       0.137000   -9999.000000   -9999.000000   -9999.000000
57439     57439     hubei          108.9197       30.2700          119       156     2012      10        11        285              0.430000      15.272003       0.421152       0.284121   -9999.000000       0.295800   -9999.000000       0.403000
57439     57439     hubei          108.9197       30.2700          119       156     2012      10        12        286              0.433750      14.424774       7.341442       0.283353       0.100000   -9999.000000       0.053000   -9999.000000
57439     57439     hubei          108.9197       30.2700          119       156     2012      10        13        287              0.432667      13.607635       0.584165       0.298651       0.110500       0.113700       0.056600       0.652000
57439     57439     hubei          108.9197       30.2700          119       156     2012      10        14        288              0.431292      14.102875       8.049619       0.289307       0.108500   -9999.000000       0.056100   -9999.000000
57439     57439     hubei          108.9197       30.2700          119       156     2012      10        15        289              0.433625      14.541351       7.242163       0.291823       0.117000       0.064600   -9999.000000       0.681000
57439     57439     hubei          108.9197       30.2700          119       156     2012      10        16        290              0.431625      14.398468       0.410139       0.306195   -9999.000000       0.269400   -9999.000000       0.477000
57439     57439     hubei          108.9197       30.2700          119       156     2012      10        17        291              0.431083      15.335938       0.000000       0.292052   -9999.000000   -9999.000000       0.097400   -9999.000000
57439     57439     hubei          108.9197       30.2700          119       156     2012      10        18        292              0.430208      15.357605       0.000000       0.285060       0.091500       0.089300       0.092200       0.400000
57439     57439     hubei          108.9197       30.2700          119       156     2012      10        19        293              0.429174      15.151733       0.104969       0.281955       0.105000   -9999.000000       0.094300   -9999.000000
57439     57439     hubei          108.9197       30.2700          119       156     2012      10        20        294              0.429000      14.234406       0.000000       0.282330       0.104000       0.170200       0.094000       0.363000
57439     57439     hubei          108.9197       30.2700          119       156     2012      10        21        295              0.431000      15.532013      10.883985       0.281424       0.185000       0.116800   -9999.000000   -9999.000000
57439     57439     hubei          108.9197       30.2700          119       156     2012      10        22        296              0.433417      16.230652       1.064949       0.300166   -9999.000000   -9999.000000   -9999.000000   -9999.000000
57439     57439     hubei          108.9197       30.2700          119       156     2012      10        23        297              0.432917      14.739014       2.528893       0.294631   -9999.000000       0.344300       0.062200       0.435000
57439     57439     hubei          108.9197       30.2700          119       156     2012      10        24        298              0.434125      13.582245       0.387994       0.289691   -9999.000000       0.252500       0.061600   -9999.000000
57439     57439     hubei          108.9197       30.2700          119       156     2012      10        25        299              0.000000      12.800079      16.448019       0.289413       0.230000       0.073600       0.060000       0.694000
57439     57439     hubei          108.9197       30.2700          119       156     2012      10        26        300              0.434667      12.896118       0.000000       0.302867       0.201000   -9999.000000       0.058600   -9999.000000
57439     57439     hubei          108.9197       30.2700          119       156     2012      10        27        301              0.433125      13.378754       0.000000       0.301427   -9999.000000   -9999.000000   -9999.000000       0.523000
57439     57439     hubei          108.9197       30.2700          119       156     2012      10        28        302              0.000000      14.295349       4.230100       0.290075       0.181000   -9999.000000   -9999.000000       0.635000
57439     57439     hubei          108.9197       30.2700          119       156     2012      10        29        303              0.435667      15.433746       2.173010       0.291065       0.211500   -9999.000000       0.122100   -9999.000000
57439     57439     hubei          108.9197       30.2700          119       156     2012      10        30        304              0.433625      14.172180       0.207382       0.296156       0.188500   -9999.000000       0.126800       0.361000
57439     57439     hubei          108.9197       30.2700          119       156     2012      10        31        305              0.432833      13.690613       0.000000       0.288056       0.187500       0.132600       0.123800   -9999.000000
57439     57439     hubei          108.9197       30.2700          119       156     2012      11        01        306              0.432167      13.272217       0.065295       0.284625       0.125000   -9999.000000   -9999.000000       0.324000
57439     57439     hubei          108.9197       30.2700          119       156     2012      11        02        307              0.432833      12.726135       8.953599       0.283691   -9999.000000   -9999.000000   -9999.000000   -9999.000000
57439     57439     hubei          108.9197       30.2700          119       156     2012      11        03        308              0.434958      13.840210       1.273957       0.293268       0.129000   -9999.000000       0.128700   -9999.000000
57439     57439     hubei          108.9197       30.2700          119       156     2012      11        04        309              0.433609      12.786560       0.810304       0.297904       0.133500   -9999.000000       0.121000       0.362000
57439     57439     hubei          108.9197       30.2700          119       156     2012      11        05        310              0.433000      12.794769       0.655773       0.287564       0.139500       0.141500       0.052000   -9999.000000
57439     57439     hubei          108.9197       30.2700          119       156     2012      11        06        311              0.433125      11.606873       2.995034       0.287055       0.134000   -9999.000000       0.049900       0.494000
57439     57439     hubei          108.9197       30.2700          119       156     2012      11        07        312              0.436542      11.846680       4.594008       0.288070   -9999.000000   -9999.000000   -9999.000000   -9999.000000
57439     57439     hubei          108.9197       30.2700          119       156     2012      11        08        313              0.435875      10.792542       0.400703       0.296925       0.153000   -9999.000000   -9999.000000   -9999.000000
57439     57439     hubei          108.9197       30.2700          119       156     2012      11        09        314              0.434000      10.502625       0.214141       0.292035       0.161000   -9999.000000       0.049400       0.614000
57439     57439     hubei          108.9197       30.2700          119       156     2012      11        10        315              0.433583       9.359894       0.691483       0.287809       0.137000   -9999.000000       0.052400   -9999.000000
57439     57439     hubei          108.9197       30.2700          119       156     2012      11        11        316              0.433000       9.609222       0.000000       0.285528       0.152000       0.075000       0.046900       0.443000
57439     57439     hubei          108.9197       30.2700          119       156     2012      11        12        317              0.433000       9.821564       0.000000       0.284243   -9999.000000   -9999.000000       0.131000   -9999.000000
57439     57439     hubei          108.9197       30.2700          119       156     2012      11        13        318              0.000000       9.744507       0.000000       0.283126   -9999.000000   -9999.000000   -9999.000000       0.305000
57439     57439     hubei          108.9197       30.2700          119       156     2012      11        14        319              0.433000      10.912109       1.114490       0.281575       0.150500   -9999.000000   -9999.000000       0.362000
57439     57439     hubei          108.9197       30.2700          119       156     2012      11        15        320              0.433083      10.812561       1.941557       0.282757       0.165500   -9999.000000       0.133500   -9999.000000
57439     57439     hubei          108.9197       30.2700          119       156     2012      11        16        321              0.435708      10.294891       0.899728       0.287056       0.150000       0.182300       0.135600       0.259000
57439     57439     hubei          108.9197       30.2700          119       156     2012      11        17        322              0.000000       9.879669       0.000000       0.286677       0.144000   -9999.000000       0.129700   -9999.000000
57439     57439     hubei          108.9197       30.2700          119       156     2012      11        18        323              0.433625      10.273529       0.000000       0.281665   -9999.000000       0.159800   -9999.000000       0.314000
57439     57439     hubei          108.9197       30.2700          119       156     2012      11        19        324              0.433000      10.540070       0.325070       0.279633       0.151000   -9999.000000   -9999.000000   -9999.000000
57439     57439     hubei          108.9197       30.2700          119       156     2012      11        20        325              0.435625       9.425507       1.309413       0.279770       0.171500   -9999.000000       0.055300   -9999.000000
57439     57439     hubei          108.9197       30.2700          119       156     2012      11        21        326              0.434583       8.643921       0.000000       0.283328       0.144000   -9999.000000       0.054300       0.432000
57439     57439     hubei          108.9197       30.2700          119       156     2012      11        22        327              0.434000       9.025970       2.199308       0.280742       0.148000   -9999.000000       0.055000   -9999.000000
57439     57439     hubei          108.9197       30.2700          119       156     2012      11        23        328              0.434000       8.337555       0.559455       0.283717   -9999.000000       0.091200       0.053700       0.362000
57439     57439     hubei          108.9197       30.2700          119       156     2012      11        24        329              0.434000       6.823090       0.452161       0.284613       0.150000   -9999.000000   -9999.000000   -9999.000000
57439     57439     hubei          108.9197       30.2700          119       156     2012      11        25        330              0.433875       6.239960       1.215988       0.280946       0.149000       0.182100   -9999.000000       0.262000
57439     57439     hubei          108.9197       30.2700          119       156     2012      11        26        331              0.433667       5.771973       0.182275       0.282476       0.146000   -9999.000000   -9999.000000       0.344000
57439     57439     hubei          108.9197       30.2700          119       156     2012      11        27        332              0.433000       6.193634       0.454790       0.280375       0.147500   -9999.000000       0.054900   -9999.000000
57439     57439     hubei          108.9197       30.2700          119       156     2012      11        28        333              0.432917       5.689240       0.000000       0.278772       0.140000   -9999.000000       0.055000       0.239000
57439     57439     hubei          108.9197       30.2700          119       156     2012      11        29        334              0.432000       5.567169       0.000000       0.277816   -9999.000000       0.185000       0.055200   -9999.000000
57439     57439     hubei          108.9197       30.2700          119       156     2012      11        30        335              0.432000       4.932220       0.543719       0.277233       0.142000       0.091300   -9999.000000       0.243000
57439     57439     hubei          108.9197       30.2700          119       156     2012      12        01        336              0.434083       4.651886       2.120125       0.277363   -9999.000000       0.181900   -9999.000000   -9999.000000
57439     57439     hubei          108.9197       30.2700          119       156     2012      12        02        337              0.433583       5.085175       0.286094       0.283571       0.130000   -9999.000000       0.054100   -9999.000000
57439     57439     hubei          108.9197       30.2700          119       156     2012      12        03        338              0.433000       5.459229       0.249088       0.278364       0.121000   -9999.000000       0.068500       0.193000
57439     57439     hubei          108.9197       30.2700          119       156     2012      12        04        339              0.432391       5.428894       0.000000       0.277273   -9999.000000       0.163600       0.067800   -9999.000000
57439     57439     hubei          108.9197       30.2700          119       156     2012      12        05        340              0.431875       4.279724       0.000000       0.276023   -9999.000000   -9999.000000   -9999.000000       0.130000
57439     57439     hubei          108.9197       30.2700          119       156     2012      12        06        341              0.431042       5.627045       1.192872       0.274198       0.133000       0.043200   -9999.000000   -9999.000000
57439     57439     hubei          108.9197       30.2700          119       156     2012      12        07        342              0.430042       5.772644       0.781952       0.275891       0.126000   -9999.000000       0.065500   -9999.000000
57439     57439     hubei          108.9197       30.2700          119       156     2012      12        08        343              0.428917       6.400299       0.202216       0.273650       0.130000       0.247300       0.069500       0.275000
57439     57439     hubei          108.9197       30.2700          119       156     2012      12        09        344              0.428125       6.661865       1.337748       0.273109   -9999.000000       0.126100       0.064100   -9999.000000
57439     57439     hubei          108.9197       30.2700          119       156     2012      12        10        345              0.432083       5.157135       3.602521       0.277598   -9999.000000   -9999.000000       0.046400       0.443000
57439     57439     hubei          108.9197       30.2700          119       156     2012      12        11        346              0.433000       4.436523       0.000000       0.285524       0.135000       0.032600   -9999.000000   -9999.000000
57439     57439     hubei          108.9197       30.2700          119       156     2012      12        12        347              0.432250       4.489441       0.190554       0.278304       0.148000   -9999.000000   -9999.000000       0.046000
57439     57439     hubei          108.9197       30.2700          119       156     2012      12        13        348              0.432000       3.969116       0.462873       0.276230       0.142500       0.044000       0.049000       0.189000
57439     57439     hubei          108.9197       30.2700          119       156     2012      12        14        349              0.432000       4.123505       0.084355       0.275356       0.137000       0.298900       0.047600   -9999.000000
57439     57439     hubei          108.9197       30.2700          119       156     2012      12        15        350              0.000000       5.120178       0.000000       0.275138   -9999.000000   -9999.000000       0.047500       0.349000
57439     57439     hubei          108.9197       30.2700          119       156     2012      12        16        351              0.432000       5.643311       0.179505       0.274363       0.135000       0.025500   -9999.000000   -9999.000000
57439     57439     hubei          108.9197       30.2700          119       156     2012      12        17        352              0.435500       6.193481       6.102448       0.273828   -9999.000000       0.063900   -9999.000000       0.346000
57439     57439     hubei          108.9197       30.2700          119       156     2012      12        18        353              0.435000       4.309784       0.173247       0.290473   -9999.000000       0.055700       0.046700   -9999.000000
57439     57439     hubei          108.9197       30.2700          119       156     2012      12        19        354              0.434792       2.768311       0.468166       0.280159   -9999.000000   -9999.000000       0.047200   -9999.000000
57439     57439     hubei          108.9197       30.2700          119       156     2012      12        20        355              0.000000       1.844666       0.059824       0.275846   -9999.000000   -9999.000000       0.047100       0.180000
57439     57439     hubei          108.9197       30.2700          119       156     2012      12        21        356              0.434000       1.653809       0.116121       0.271168   -9999.000000       0.204100       0.044900   -9999.000000
57439     57439     hubei          108.9197       30.2700          119       156     2012      12        22        357              0.434292       1.830627       0.537902       0.269553   -9999.000000       0.164800   -9999.000000       0.421000
57439     57439     hubei          108.9197       30.2700          119       156     2012      12        23        358              0.435208       1.653320       0.832806       0.264125   -9999.000000   -9999.000000   -9999.000000   -9999.000000
57439     57439     hubei          108.9197       30.2700          119       156     2012      12        24        359              0.434444       1.174225       1.268942       0.252097       0.096000       0.137100       0.055600       0.129000
57439     57439     hubei          108.9197       30.2700          119       156     2012      12        25        360              0.434292       2.675232       0.354542       0.267666   -9999.000000   -9999.000000       0.060500       0.185000
57439     57439     hubei          108.9197       30.2700          119       156     2012      12        26        361              0.000000       1.529785       0.879802       0.265068   -9999.000000   -9999.000000       0.053200   -9999.000000
57439     57439     hubei          108.9197       30.2700          119       156     2012      12        27        362              0.435000       1.430054       0.173037       0.262839   -9999.000000       0.212100       0.055500       0.246000
57439     57439     hubei          108.9197       30.2700          119       156     2012      12        28        363              0.000000       1.652344       3.128399       0.263525   -9999.000000   -9999.000000   -9999.000000   -9999.000000
57439     57439     hubei          108.9197       30.2700          119       156     2012      12        29        364              0.000000       1.582092       0.674660       0.270676   -9999.000000       0.173300   -9999.000000       0.107000
57439     57439     hubei          108.9197       30.2700          119       156     2012      12        30        365              0.000000       0.891113       1.330577       0.248709   -9999.000000   -9999.000000       0.046800   -9999.000000
57439     57439     hubei          108.9197       30.2700          119       156     2012      12        31        366              0.433867       0.573456       1.463048       0.216331   -9999.000000   -9999.000000       0.061700   -9999.000000
