# Supplementary material for: Research on Fusing Multisatellite Soil Moisture Data Based on Bayesian Model Averaging
Source: Hindawi journal article supplement (doi:10.1155/2018/9310838), 2018-06-25
Supplement: f1 [file 9310838.f1.zip › 2012_sm00-10cm_daily_ZDB_ZHY_57474_366days_allin.txt]

57474     57474     hubei          112.1481       30.3503          119       169     2012      01        01        001              0.000000   -9999.000000       0.000000   -9999.000000   -9999.000000   -9999.000000       0.131300   -9999.000000
57474     57474     hubei          112.1481       30.3503          119       169     2012      01        02        002              0.344250       5.270081       0.912306       0.380875   -9999.000000       0.196200   -9999.000000       0.342000
57474     57474     hubei          112.1481       30.3503          119       169     2012      01        03        003              0.000000       4.388916       0.000000       0.383220   -9999.000000       0.162100   -9999.000000       0.264000
57474     57474     hubei          112.1481       30.3503          119       169     2012      01        04        004              0.341625       2.519684       0.000000       0.368313   -9999.000000   -9999.000000       0.162900   -9999.000000
57474     57474     hubei          112.1481       30.3503          119       169     2012      01        05        005              0.339292       3.610168       0.000000       0.373643   -9999.000000       0.127900       0.155700       0.269000
57474     57474     hubei          112.1481       30.3503          119       169     2012      01        06        006              0.338875       2.312408       0.000000       0.364181   -9999.000000   -9999.000000       0.170000   -9999.000000
57474     57474     hubei          112.1481       30.3503          119       169     2012      01        07        007              0.335458       4.029602       0.000000       0.372991   -9999.000000       0.303300       0.170100       0.301000
57474     57474     hubei          112.1481       30.3503          119       169     2012      01        08        008              0.000000       2.183258       0.000000       0.370704   -9999.000000   -9999.000000   -9999.000000   -9999.000000
57474     57474     hubei          112.1481       30.3503          119       169     2012      01        09        009              0.335333       2.608337       0.000000       0.374294   -9999.000000       0.140900   -9999.000000   -9999.000000
57474     57474     hubei          112.1481       30.3503          119       169     2012      01        10        010              0.335083       3.975922       0.000000       0.378864   -9999.000000       0.018800       0.099100       0.364000
57474     57474     hubei          112.1481       30.3503          119       169     2012      01        11        011              0.333417       3.885315       0.000000       0.378493   -9999.000000   -9999.000000       0.115700   -9999.000000
57474     57474     hubei          112.1481       30.3503          119       169     2012      01        12        012              0.333000       3.464386       0.000000       0.378196   -9999.000000       0.398200       0.114700       0.220000
57474     57474     hubei          112.1481       30.3503          119       169     2012      01        13        013              0.335375       2.996887       2.187965       0.378618   -9999.000000       0.222400       0.110800   -9999.000000
57474     57474     hubei          112.1481       30.3503          119       169     2012      01        14        014              0.346667       3.756317       7.016541       0.380731   -9999.000000   -9999.000000   -9999.000000   -9999.000000
57474     57474     hubei          112.1481       30.3503          119       169     2012      01        15        015              0.356792       2.607513       0.138493       0.387636   -9999.000000       0.321700   -9999.000000       0.811000
57474     57474     hubei          112.1481       30.3503          119       169     2012      01        16        016              0.371917       3.490509       0.000000       0.389152   -9999.000000   -9999.000000       0.101200   -9999.000000
57474     57474     hubei          112.1481       30.3503          119       169     2012      01        17        017              0.000000       5.381622       1.636298       0.384307   -9999.000000       0.345000       0.112400       0.667000
57474     57474     hubei          112.1481       30.3503          119       169     2012      01        18        018              0.381083       3.871796       0.414420       0.384344   -9999.000000       0.239100       0.109200   -9999.000000
57474     57474     hubei          112.1481       30.3503          119       169     2012      01        19        019              0.383583       4.546356       1.577516       0.384540   -9999.000000   -9999.000000   -9999.000000       0.511000
57474     57474     hubei          112.1481       30.3503          119       169     2012      01        20        020              0.436000       3.826630       7.460788       0.384099   -9999.000000       0.190000   -9999.000000       1.000000
57474     57474     hubei          112.1481       30.3503          119       169     2012      01        21        021              0.452750       3.330566       2.375339       0.394254   -9999.000000       0.284200       0.089200   -9999.000000
57474     57474     hubei          112.1481       30.3503          119       169     2012      01        22        022              0.447917       1.378937       0.958551       0.360076   -9999.000000   -9999.000000       0.079500       0.084000
57474     57474     hubei          112.1481       30.3503          119       169     2012      01        23        023              0.450625       0.611664       0.941373       0.323959   -9999.000000       0.202400       0.123000   -9999.000000
57474     57474     hubei          112.1481       30.3503          119       169     2012      01        24        024              0.447125       1.437531       0.519320       0.345367   -9999.000000   -9999.000000   -9999.000000       0.045000
57474     57474     hubei          112.1481       30.3503          119       169     2012      01        25        025              0.441292       2.884155       0.552377       0.362905   -9999.000000   -9999.000000   -9999.000000   -9999.000000
57474     57474     hubei          112.1481       30.3503          119       169     2012      01        26        026              0.437667       3.909882       0.361632       0.372988   -9999.000000       0.253700   -9999.000000   -9999.000000
57474     57474     hubei          112.1481       30.3503          119       169     2012      01        27        027              0.433792       5.448425       0.000000       0.379338   -9999.000000       0.032000       0.116400       0.075000
57474     57474     hubei          112.1481       30.3503          119       169     2012      01        28        028              0.429208       4.479034       0.000000       0.380875   -9999.000000       0.026300       0.119800   -9999.000000
57474     57474     hubei          112.1481       30.3503          119       169     2012      01        29        029              0.423833       6.178497       0.000000       0.379724   -9999.000000   -9999.000000       0.123900       0.525000
57474     57474     hubei          112.1481       30.3503          119       169     2012      01        30        030              0.423000       3.843079       0.000000       0.380250   -9999.000000       0.166000       0.152300   -9999.000000
57474     57474     hubei          112.1481       30.3503          119       169     2012      01        31        031              0.418042       5.083466       0.000000       0.379853   -9999.000000       0.249900   -9999.000000       0.434000
57474     57474     hubei          112.1481       30.3503          119       169     2012      02        01        032              0.410458       7.204620       0.000000       0.378890   -9999.000000   -9999.000000   -9999.000000       0.234000
57474     57474     hubei          112.1481       30.3503          119       169     2012      02        02        033              0.401750       4.264862       0.140599       0.377396   -9999.000000       0.220600       0.115200   -9999.000000
57474     57474     hubei          112.1481       30.3503          119       169     2012      02        03        034              0.397375       2.740265       0.000000       0.367573   -9999.000000   -9999.000000       0.153300       0.061000
57474     57474     hubei          112.1481       30.3503          119       169     2012      02        04        035              0.394375       5.395020       0.000000       0.375635   -9999.000000       0.292900       0.149000   -9999.000000
57474     57474     hubei          112.1481       30.3503          119       169     2012      02        05        036              0.394333       4.488525       0.106489       0.379030   -9999.000000       0.115300   -9999.000000       0.346000
57474     57474     hubei          112.1481       30.3503          119       169     2012      02        06        037              0.394958       3.972107       0.000000       0.379649   -9999.000000   -9999.000000   -9999.000000   -9999.000000
57474     57474     hubei          112.1481       30.3503          119       169     2012      02        07        038              0.389458       4.763519       0.000000       0.379661   -9999.000000       0.144200       0.135600   -9999.000000
57474     57474     hubei          112.1481       30.3503          119       169     2012      02        08        039              0.382667       4.399780       0.000000       0.375068   -9999.000000   -9999.000000       0.138800       0.390000
57474     57474     hubei          112.1481       30.3503          119       169     2012      02        09        040              0.377042       4.703888       0.000000       0.375970   -9999.000000       0.110000       0.138600   -9999.000000
57474     57474     hubei          112.1481       30.3503          119       169     2012      02        10        041              0.374000       2.756195       0.000000       0.372029   -9999.000000       0.065700       0.132400       0.262000
57474     57474     hubei          112.1481       30.3503          119       169     2012      02        11        042              0.370333       5.069855       0.000000       0.374604   -9999.000000   -9999.000000   -9999.000000   -9999.000000
57474     57474     hubei          112.1481       30.3503          119       169     2012      02        12        043              0.367125       6.893616       0.179778       0.375613   -9999.000000       0.328800   -9999.000000   -9999.000000
57474     57474     hubei          112.1481       30.3503          119       169     2012      02        13        044              0.369125       5.182037       0.000000       0.377164   -9999.000000   -9999.000000   -9999.000000       0.317000
57474     57474     hubei          112.1481       30.3503          119       169     2012      02        14        045              0.380542       4.493927       1.524502       0.377555   -9999.000000   -9999.000000       0.164800   -9999.000000
57474     57474     hubei          112.1481       30.3503          119       169     2012      02        15        046              0.393208       4.326050       0.085867       0.380166   -9999.000000   -9999.000000       0.161500       0.464000
57474     57474     hubei          112.1481       30.3503          119       169     2012      02        16        047              0.393333       4.183594       0.000000       0.379758   -9999.000000   -9999.000000       0.145900   -9999.000000
57474     57474     hubei          112.1481       30.3503          119       169     2012      02        17        048              0.388333       6.904907       0.000000       0.377739   -9999.000000       0.254100   -9999.000000       0.066000
57474     57474     hubei          112.1481       30.3503          119       169     2012      02        18        049              0.382542       6.748199       0.000000       0.375950   -9999.000000       0.115800   -9999.000000       0.443000
57474     57474     hubei          112.1481       30.3503          119       169     2012      02        19        050              0.377292       6.082245       0.000000       0.374952   -9999.000000   -9999.000000       0.132400   -9999.000000
57474     57474     hubei          112.1481       30.3503          119       169     2012      02        20        051              0.374348       7.977264       0.251490       0.373806   -9999.000000       0.093900       0.113800       0.138000
57474     57474     hubei          112.1481       30.3503          119       169     2012      02        21        052              0.374083       7.071106       0.472312       0.375146   -9999.000000   -9999.000000   -9999.000000   -9999.000000
57474     57474     hubei          112.1481       30.3503          119       169     2012      02        22        053              0.375958       7.703522       0.649910       0.376207   -9999.000000       0.123300   -9999.000000       0.251000
57474     57474     hubei          112.1481       30.3503          119       169     2012      02        23        054              0.376458       8.871826       0.326559       0.378079       0.156000       0.042800   -9999.000000   -9999.000000
57474     57474     hubei          112.1481       30.3503          119       169     2012      02        24        055              0.375000       6.422516       0.000000       0.377450   -9999.000000   -9999.000000       0.110000   -9999.000000
57474     57474     hubei          112.1481       30.3503          119       169     2012      02        25        056              0.377167       4.573883       1.890883       0.376334   -9999.000000       0.142600       0.115800       0.336000
57474     57474     hubei          112.1481       30.3503          119       169     2012      02        26        057              0.382000       3.637512       0.000000       0.379225   -9999.000000   -9999.000000       0.114300   -9999.000000
57474     57474     hubei          112.1481       30.3503          119       169     2012      02        27        058              0.378957       5.750519       0.000000       0.376077   -9999.000000       0.057400   -9999.000000       0.024000
57474     57474     hubei          112.1481       30.3503          119       169     2012      02        28        059              0.377250       4.927216       0.887881       0.374925   -9999.000000   -9999.000000   -9999.000000   -9999.000000
57474     57474     hubei          112.1481       30.3503          119       169     2012      02        29        060              0.000000   -9999.000000       0.000000   -9999.000000   -9999.000000   -9999.000000   -9999.000000   -9999.000000
57474     57474     hubei          112.1481       30.3503          119       169     2012      03        01        061              0.373458       6.835541       0.000000       0.375224   -9999.000000       0.328100       0.093400       0.086000
57474     57474     hubei          112.1481       30.3503          119       169     2012      03        02        062              0.392083       7.427826      10.330007       0.374339   -9999.000000   -9999.000000       0.131300   -9999.000000
57474     57474     hubei          112.1481       30.3503          119       169     2012      03        03        063              0.459333       6.836853       3.273243       0.384255   -9999.000000       0.101400       0.131800       0.819000
57474     57474     hubei          112.1481       30.3503          119       169     2012      03        04        064              0.460958       5.856750       0.203058       0.391075   -9999.000000       0.033200       0.123100   -9999.000000
57474     57474     hubei          112.1481       30.3503          119       169     2012      03        05        065              0.453708       4.582306       0.000000       0.385844   -9999.000000   -9999.000000   -9999.000000       0.097000
57474     57474     hubei          112.1481       30.3503          119       169     2012      03        06        066              0.449333       8.158264       0.834238       0.380222   -9999.000000       0.130200   -9999.000000   -9999.000000
57474     57474     hubei          112.1481       30.3503          119       169     2012      03        07        067              0.000000       7.096375       5.901824       0.380401   -9999.000000       0.068900       0.136500   -9999.000000
57474     57474     hubei          112.1481       30.3503          119       169     2012      03        08        068              0.470500       6.757507       4.766607       0.388420   -9999.000000   -9999.000000       0.145200       0.449000
57474     57474     hubei          112.1481       30.3503          119       169     2012      03        09        069              0.468500       5.852448       0.987884       0.391477   -9999.000000       0.058900       0.145000   -9999.000000
57474     57474     hubei          112.1481       30.3503          119       169     2012      03        10        070              0.461667       6.481781       0.000000       0.386349   -9999.000000   -9999.000000   -9999.000000       0.041000
57474     57474     hubei          112.1481       30.3503          119       169     2012      03        11        071              0.455542       9.665375       0.000000       0.380447   -9999.000000       0.088200   -9999.000000   -9999.000000
57474     57474     hubei          112.1481       30.3503          119       169     2012      03        12        072              0.449292       9.136566       0.000000       0.378485   -9999.000000       0.117300       0.150500   -9999.000000
57474     57474     hubei          112.1481       30.3503          119       169     2012      03        13        073              0.439304       9.793427       0.161563       0.376386   -9999.000000   -9999.000000       0.151400       0.062000
57474     57474     hubei          112.1481       30.3503          119       169     2012      03        14        074              0.428792      12.553253       0.392440       0.374177       0.209000       0.035700   -9999.000000   -9999.000000
57474     57474     hubei          112.1481       30.3503          119       169     2012      03        15        075              0.426417      13.165741       0.000000       0.373975       0.197000   -9999.000000       0.167600       0.037000
57474     57474     hubei          112.1481       30.3503          119       169     2012      03        16        076              0.421870      10.614166       0.331065       0.375364       0.183000   -9999.000000   -9999.000000   -9999.000000
57474     57474     hubei          112.1481       30.3503          119       169     2012      03        17        077              0.418125      10.953278       0.141509       0.375003       0.186000       0.046200   -9999.000000       0.051000
57474     57474     hubei          112.1481       30.3503          119       169     2012      03        18        078              0.415000      12.497559       1.279090       0.374839   -9999.000000   -9999.000000       0.147800       0.275000
57474     57474     hubei          112.1481       30.3503          119       169     2012      03        19        079              0.413458      14.345032       0.361239       0.375576   -9999.000000       0.116400       0.182000   -9999.000000
57474     57474     hubei          112.1481       30.3503          119       169     2012      03        20        080              0.319261       7.494995       0.451605       0.376177   -9999.000000       0.186900       0.186400       0.249000
57474     57474     hubei          112.1481       30.3503          119       169     2012      03        21        081              0.277000       7.533325      14.981475       0.375796   -9999.000000   -9999.000000   -9999.000000   -9999.000000
57474     57474     hubei          112.1481       30.3503          119       169     2012      03        22        082              0.376625       8.691895      34.250019       0.387696   -9999.000000       0.198500   -9999.000000       0.619000
57474     57474     hubei          112.1481       30.3503          119       169     2012      03        23        083              0.360250       7.316864       0.000000       0.420045   -9999.000000   -9999.000000       0.186300   -9999.000000
57474     57474     hubei          112.1481       30.3503          119       169     2012      03        24        084              0.334875      12.677216       0.479210       0.395990   -9999.000000       0.292800   -9999.000000   -9999.000000
57474     57474     hubei          112.1481       30.3503          119       169     2012      03        25        085              0.000000      14.653107       0.000000       0.385914       0.164000       0.304000       0.179900       0.180000
57474     57474     hubei          112.1481       30.3503          119       169     2012      03        26        086              0.257167      16.724670       0.000000       0.380864       0.161000   -9999.000000       0.197400   -9999.000000
57474     57474     hubei          112.1481       30.3503          119       169     2012      03        27        087              0.225417      17.985199       0.155067       0.376998       0.171000       0.236500   -9999.000000       0.053000
57474     57474     hubei          112.1481       30.3503          119       169     2012      03        28        088              0.214583      19.609772       1.778448       0.375171   -9999.000000   -9999.000000   -9999.000000   -9999.000000
57474     57474     hubei          112.1481       30.3503          119       169     2012      03        29        089              0.279708      17.287689      14.186445       0.378791   -9999.000000       0.060900       0.218600       0.441000
57474     57474     hubei          112.1481       30.3503          119       169     2012      03        30        090              0.362167      17.042816       1.687610       0.395983   -9999.000000       0.231300       0.216400       0.621000
57474     57474     hubei          112.1481       30.3503          119       169     2012      03        31        091              0.328542      16.133423       0.000000       0.394577       0.157000   -9999.000000       0.195100   -9999.000000
57474     57474     hubei          112.1481       30.3503          119       169     2012      04        01        092              0.274167      17.678131       7.645397       0.382550       0.193000       0.080500       0.200200       0.207000
57474     57474     hubei          112.1481       30.3503          119       169     2012      04        02        093              0.217042      19.116791       0.000000       0.377905   -9999.000000   -9999.000000   -9999.000000   -9999.000000
57474     57474     hubei          112.1481       30.3503          119       169     2012      04        03        094              0.184000      19.900208       0.957207       0.373786   -9999.000000       0.106100   -9999.000000       0.254000
57474     57474     hubei          112.1481       30.3503          119       169     2012      04        04        095              0.317750      16.426178      11.287484       0.375241       0.258000       0.222700       0.165800   -9999.000000
57474     57474     hubei          112.1481       30.3503          119       169     2012      04        05        096              0.311667      13.455750       0.576378       0.396831       0.202000   -9999.000000       0.183300   -9999.000000
57474     57474     hubei          112.1481       30.3503          119       169     2012      04        06        097              0.279333      16.748627       0.485272       0.385047       0.212000       0.055100       0.177100       0.117000
57474     57474     hubei          112.1481       30.3503          119       169     2012      04        07        098              0.246667      19.724243       0.126342       0.380383       0.224000       0.182600   -9999.000000   -9999.000000
57474     57474     hubei          112.1481       30.3503          119       169     2012      04        08        099              0.225875      20.262726       0.853838       0.378128   -9999.000000       0.047600   -9999.000000       0.118000
57474     57474     hubei          112.1481       30.3503          119       169     2012      04        09        100              0.250708      19.047516       2.698611       0.379428   -9999.000000       0.166200       0.140200   -9999.000000
57474     57474     hubei          112.1481       30.3503          119       169     2012      04        10        101              0.292083      18.862091       4.380610       0.384824   -9999.000000   -9999.000000       0.141300   -9999.000000
57474     57474     hubei          112.1481       30.3503          119       169     2012      04        11        102              0.293917      18.314667       0.089577       0.388995       0.255000       0.215500       0.142800       0.230000
57474     57474     hubei          112.1481       30.3503          119       169     2012      04        12        103              0.350833      19.773041      23.494028       0.382989   -9999.000000   -9999.000000       0.164400   -9999.000000
57474     57474     hubei          112.1481       30.3503          119       169     2012      04        13        104              0.365208      14.642548       0.508534       0.409985   -9999.000000   -9999.000000   -9999.000000       0.409000
57474     57474     hubei          112.1481       30.3503          119       169     2012      04        14        105              0.368875      16.655273       0.125590       0.392829   -9999.000000       0.212600   -9999.000000   -9999.000000
57474     57474     hubei          112.1481       30.3503          119       169     2012      04        15        106              0.365292      15.929352       0.261121       0.388449       0.288000   -9999.000000       0.140300       0.684000
57474     57474     hubei          112.1481       30.3503          119       169     2012      04        16        107              0.361042      15.267242       0.000000       0.386654       0.245000   -9999.000000       0.228200       0.769000
57474     57474     hubei          112.1481       30.3503          119       169     2012      04        17        108              0.354708      17.394836       0.194641       0.383615       0.275000       0.118100       0.215800   -9999.000000
57474     57474     hubei          112.1481       30.3503          119       169     2012      04        18        109              0.340042      17.959259       0.302816       0.382690   -9999.000000   -9999.000000   -9999.000000       0.150000
57474     57474     hubei          112.1481       30.3503          119       169     2012      04        19        110              0.319542      20.930756       0.000000       0.378643   -9999.000000       0.353600   -9999.000000   -9999.000000
57474     57474     hubei          112.1481       30.3503          119       169     2012      04        20        111              0.343750      23.238922       0.840166       0.376176       0.291000   -9999.000000   -9999.000000       0.640000
57474     57474     hubei          112.1481       30.3503          119       169     2012      04        21        112              0.330833      18.686615       0.331834       0.380262       0.231000       0.178800       0.189000   -9999.000000
57474     57474     hubei          112.1481       30.3503          119       169     2012      04        22        113              0.308042      22.054810      15.396500       0.374953       0.233000       0.402500       0.225600   -9999.000000
57474     57474     hubei          112.1481       30.3503          119       169     2012      04        23        114              0.293708      22.430298       4.888501       0.394563   -9999.000000   -9999.000000       0.243000       0.550000
57474     57474     hubei          112.1481       30.3503          119       169     2012      04        24        115              0.346833      23.711853       3.727246       0.390008   -9999.000000       0.188400   -9999.000000   -9999.000000
57474     57474     hubei          112.1481       30.3503          119       169     2012      04        25        116              0.000000      21.615784       0.845679       0.393389   -9999.000000       0.411600   -9999.000000       0.706000
57474     57474     hubei          112.1481       30.3503          119       169     2012      04        26        117              0.302333      19.787231       0.491382       0.385389       0.230000       0.069600       0.242000   -9999.000000
57474     57474     hubei          112.1481       30.3503          119       169     2012      04        27        118              0.279917      21.610657       0.528223       0.378661       0.223000       0.060700   -9999.000000       0.302000
57474     57474     hubei          112.1481       30.3503          119       169     2012      04        28        119              0.326125      23.806915       9.235962       0.374809       0.260000   -9999.000000       0.286200       0.703000
57474     57474     hubei          112.1481       30.3503          119       169     2012      04        29        120              0.341833      22.990082       0.664770       0.391240   -9999.000000       0.134300       0.261500   -9999.000000
57474     57474     hubei          112.1481       30.3503          119       169     2012      04        30        121              0.381833      22.434479      16.590014       0.385821   -9999.000000   -9999.000000   -9999.000000       1.000000
57474     57474     hubei          112.1481       30.3503          119       169     2012      05        01        122              0.376625      20.611969       0.436206       0.406032       0.261000   -9999.000000   -9999.000000   -9999.000000
57474     57474     hubei          112.1481       30.3503          119       169     2012      05        02        123              0.364542      22.114746       2.063494       0.389304       0.287500       0.156400       0.209500       0.634000
57474     57474     hubei          112.1481       30.3503          119       169     2012      05        03        124              0.376750      23.656097       5.124016       0.386103       0.286000   -9999.000000       0.233300   -9999.000000
57474     57474     hubei          112.1481       30.3503          119       169     2012      05        04        125              0.372708      21.686920       0.000000       0.394281   -9999.000000       0.483100       0.204900   -9999.000000
57474     57474     hubei          112.1481       30.3503          119       169     2012      05        05        126              0.359917      24.432037       0.549549       0.385150   -9999.000000   -9999.000000       0.207000       0.747000
57474     57474     hubei          112.1481       30.3503          119       169     2012      05        06        127              0.341750      26.310760       0.000000       0.379875       0.216000   -9999.000000   -9999.000000   -9999.000000
57474     57474     hubei          112.1481       30.3503          119       169     2012      05        07        128              0.341375      27.577789       1.723726       0.377246   -9999.000000       0.539200   -9999.000000       0.561000
57474     57474     hubei          112.1481       30.3503          119       169     2012      05        08        129              0.380833      27.075867       7.233639       0.379195       0.255000   -9999.000000       0.187700   -9999.000000
57474     57474     hubei          112.1481       30.3503          119       169     2012      05        09        130              0.381750      26.280212       3.805303       0.388557   -9999.000000       0.411800       0.207600   -9999.000000
57474     57474     hubei          112.1481       30.3503          119       169     2012      05        10        131              0.374833      24.340851       0.000000       0.391431       0.253000       0.253400       0.190400       0.805000
57474     57474     hubei          112.1481       30.3503          119       169     2012      05        11        132              0.370417      27.264160       5.829036       0.380750       0.247500   -9999.000000   -9999.000000   -9999.000000
57474     57474     hubei          112.1481       30.3503          119       169     2012      05        12        133              0.387667      27.464355      28.983847       0.384793       0.275000       0.089400   -9999.000000       1.000000
57474     57474     hubei          112.1481       30.3503          119       169     2012      05        13        134              0.398917      20.730438      22.290821       0.415857       0.296500   -9999.000000       0.233200   -9999.000000
57474     57474     hubei          112.1481       30.3503          119       169     2012      05        14        135              0.410458      20.963348       2.851512       0.411453       0.289000   -9999.000000       0.246200       0.954000
57474     57474     hubei          112.1481       30.3503          119       169     2012      05        15        136              0.396458      20.218811       0.000000       0.405803   -9999.000000       0.181400       0.248500       0.749000
57474     57474     hubei          112.1481       30.3503          119       169     2012      05        16        137              0.388333      21.939087       0.659981       0.397346   -9999.000000   -9999.000000       0.232100   -9999.000000
57474     57474     hubei          112.1481       30.3503          119       169     2012      05        17        138              0.374750      24.474915       0.374861       0.392172       0.215000       0.332600   -9999.000000       0.332000
57474     57474     hubei          112.1481       30.3503          119       169     2012      05        18        139              0.363708      26.951996       7.047336       0.388777       0.307000       0.387000   -9999.000000   -9999.000000
57474     57474     hubei          112.1481       30.3503          119       169     2012      05        19        140              0.362833      23.886627       2.623435       0.396270       0.238000   -9999.000000       0.220000       0.651000
57474     57474     hubei          112.1481       30.3503          119       169     2012      05        20        141              0.353542      25.896667       2.922482       0.391509   -9999.000000       0.138000       0.250300   -9999.000000
57474     57474     hubei          112.1481       30.3503          119       169     2012      05        21        142              0.346042      25.901276       0.000000       0.384511       0.267000   -9999.000000       0.193800   -9999.000000
57474     57474     hubei          112.1481       30.3503          119       169     2012      05        22        143              0.358458      25.094299       4.092806       0.383991       0.285000       0.219900       0.226500       0.783000
57474     57474     hubei          112.1481       30.3503          119       169     2012      05        23        144              0.383833      22.230347       7.651221       0.390281   -9999.000000       0.341200   -9999.000000   -9999.000000
57474     57474     hubei          112.1481       30.3503          119       169     2012      05        24        145              0.390417      20.923492       3.158850       0.396301       0.324000   -9999.000000   -9999.000000       0.820000
57474     57474     hubei          112.1481       30.3503          119       169     2012      05        25        146              0.000000      20.322266       0.440558       0.395941   -9999.000000       0.108500       0.262000   -9999.000000
57474     57474     hubei          112.1481       30.3503          119       169     2012      05        26        147              0.388083      21.353760       5.679862       0.389550   -9999.000000   -9999.000000       0.273700       0.363000
57474     57474     hubei          112.1481       30.3503          119       169     2012      05        27        148              0.382125      25.077454       0.000000       0.384118       0.290000       0.474100       0.252800       0.111000
57474     57474     hubei          112.1481       30.3503          119       169     2012      05        28        149              0.385292      26.043976      24.332054       0.382016       0.338000       0.285900   -9999.000000   -9999.000000
57474     57474     hubei          112.1481       30.3503          119       169     2012      05        29        150              0.420292      26.821869      45.402504       0.399757   -9999.000000   -9999.000000   -9999.000000       1.000000
57474     57474     hubei          112.1481       30.3503          119       169     2012      05        30        151              0.405625      21.741058       0.000000       0.431715   -9999.000000       0.331900       0.315900   -9999.000000
57474     57474     hubei          112.1481       30.3503          119       169     2012      05        31        152              0.397667      25.866882       0.529576       0.410021   -9999.000000       0.238100       0.289900   -9999.000000
57474     57474     hubei          112.1481       30.3503          119       169     2012      06        01        153              0.393458      26.069092       1.549298       0.404116   -9999.000000   -9999.000000       0.320400   -9999.000000
57474     57474     hubei          112.1481       30.3503          119       169     2012      06        02        154              0.396875      22.818848       2.040116       0.403562       0.297000       0.230600       0.300300   -9999.000000
57474     57474     hubei          112.1481       30.3503          119       169     2012      06        03        155              0.394125      25.547760       1.967917       0.397285       0.394000   -9999.000000   -9999.000000       0.643000
57474     57474     hubei          112.1481       30.3503          119       169     2012      06        04        156              0.394708      24.362946       0.082785       0.398116       0.316000   -9999.000000   -9999.000000   -9999.000000
57474     57474     hubei          112.1481       30.3503          119       169     2012      06        05        157              0.386625      24.644440       2.207274       0.394993   -9999.000000   -9999.000000       0.221700       0.574000
57474     57474     hubei          112.1481       30.3503          119       169     2012      06        06        158              0.374042      26.241455       0.481549       0.394126   -9999.000000       0.207000       0.220100   -9999.000000
57474     57474     hubei          112.1481       30.3503          119       169     2012      06        07        159              0.355500      27.588776       0.000000       0.391651       0.291000       0.237900       0.235400   -9999.000000
57474     57474     hubei          112.1481       30.3503          119       169     2012      06        08        160              0.340792      27.275970       0.101923       0.388310       0.302500   -9999.000000       0.219600       0.448000
57474     57474     hubei          112.1481       30.3503          119       169     2012      06        09        161              0.329417      28.949127       1.005584       0.385684       0.258000       0.549000   -9999.000000   -9999.000000
57474     57474     hubei          112.1481       30.3503          119       169     2012      06        10        162              0.333500      30.116089       1.250073       0.382408   -9999.000000       0.374700   -9999.000000       0.517000
57474     57474     hubei          112.1481       30.3503          119       169     2012      06        11        163              0.000000      27.996490       0.000000       0.383968   -9999.000000   -9999.000000       0.242300   -9999.000000
57474     57474     hubei          112.1481       30.3503          119       169     2012      06        12        164              0.324708      27.770752       0.000000       0.379301       0.320000       0.172900       0.251400       0.225000
57474     57474     hubei          112.1481       30.3503          119       169     2012      06        13        165              0.314667      29.450043       0.063014       0.373327       0.281000   -9999.000000       0.259100       0.808000
57474     57474     hubei          112.1481       30.3503          119       169     2012      06        14        166              0.312458      29.888519       0.000000       0.369776       0.330000       0.175500   -9999.000000   -9999.000000
57474     57474     hubei          112.1481       30.3503          119       169     2012      06        15        167              0.306958      28.192902       2.215801       0.371407   -9999.000000       0.276000   -9999.000000       0.222000
57474     57474     hubei          112.1481       30.3503          119       169     2012      06        16        168              0.299000      28.617340       0.000000       0.366407   -9999.000000   -9999.000000       0.197300   -9999.000000
57474     57474     hubei          112.1481       30.3503          119       169     2012      06        17        169              0.293833      29.189880       0.000000       0.365170       0.344000       0.372900       0.225500       0.349000
57474     57474     hubei          112.1481       30.3503          119       169     2012      06        18        170              0.289250      29.568054       0.000000       0.362705       0.323000       0.386900       0.268800   -9999.000000
57474     57474     hubei          112.1481       30.3503          119       169     2012      06        19        171              0.285542      29.482086       0.000000       0.362705       0.318000       0.148500       0.245700   -9999.000000
57474     57474     hubei          112.1481       30.3503          119       169     2012      06        20        172              0.281125      30.831787       0.000000       0.359791   -9999.000000       0.165000   -9999.000000       0.114000
57474     57474     hubei          112.1481       30.3503          119       169     2012      06        21        173              0.278042      30.667908       0.000000       0.358613   -9999.000000   -9999.000000   -9999.000000   -9999.000000
57474     57474     hubei          112.1481       30.3503          119       169     2012      06        22        174              0.275250      30.408264       0.000000       0.357887       0.352000       0.214300       0.189200       0.335000
57474     57474     hubei          112.1481       30.3503          119       169     2012      06        23        175              0.271875      30.768311       0.000000       0.354876       0.311500   -9999.000000       0.210200   -9999.000000
57474     57474     hubei          112.1481       30.3503          119       169     2012      06        24        176              0.292292      30.850281       0.000000       0.352511       0.292000   -9999.000000       0.214600       0.508000
57474     57474     hubei          112.1481       30.3503          119       169     2012      06        25        177              0.314625      30.819550      31.769264       0.349118       0.274000       0.054800   -9999.000000       0.071000
57474     57474     hubei          112.1481       30.3503          119       169     2012      06        26        178              0.427000      29.525787      80.319038       0.377190   -9999.000000   -9999.000000   -9999.000000   -9999.000000
57474     57474     hubei          112.1481       30.3503          119       169     2012      06        27        179              0.424958      27.075226      14.206680       0.440081       0.498000       0.346300       0.156500       1.000000
57474     57474     hubei          112.1481       30.3503          119       169     2012      06        28        180              0.424391      25.719543      21.148762       0.415310       0.412500   -9999.000000       0.149500   -9999.000000
57474     57474     hubei          112.1481       30.3503          119       169     2012      06        29        181              0.414667      26.614227       0.194832       0.415997       0.359000   -9999.000000       0.154200       1.000000
57474     57474     hubei          112.1481       30.3503          119       169     2012      06        30        182              0.405250      29.644257       0.000000       0.399235       0.343000       0.178100       0.155800   -9999.000000
57474     57474     hubei          112.1481       30.3503          119       169     2012      07        01        183              0.396818      27.448425       0.140705       0.397063   -9999.000000   -9999.000000   -9999.000000   -9999.000000
57474     57474     hubei          112.1481       30.3503          119       169     2012      07        02        184              0.369917      28.401825       0.000000       0.396229       0.375000       0.234500   -9999.000000       0.431000
57474     57474     hubei          112.1481       30.3503          119       169     2012      07        03        185              0.340458      31.031342       0.000000       0.391419       0.345000       0.167500       0.267700   -9999.000000
57474     57474     hubei          112.1481       30.3503          119       169     2012      07        04        186              0.321583      31.625824       0.000000       0.388352       0.351500   -9999.000000       0.263200       0.600000
57474     57474     hubei          112.1481       30.3503          119       169     2012      07        05        187              0.310250      31.166504       0.627629       0.385745       0.347000       0.241900       0.273500   -9999.000000
57474     57474     hubei          112.1481       30.3503          119       169     2012      07        06        188              0.302750      29.951691       0.276766       0.384366   -9999.000000       0.180500       0.268500   -9999.000000
57474     57474     hubei          112.1481       30.3503          119       169     2012      07        07        189              0.293375      31.545227       2.850030       0.382161   -9999.000000       0.169200   -9999.000000       0.566000
57474     57474     hubei          112.1481       30.3503          119       169     2012      07        08        190              0.284333      32.265167       5.062308       0.377263       0.325500       0.220300   -9999.000000   -9999.000000
57474     57474     hubei          112.1481       30.3503          119       169     2012      07        09        191              0.276208      31.912048       0.000000       0.373084       0.324000   -9999.000000       0.237400       0.038000
57474     57474     hubei          112.1481       30.3503          119       169     2012      07        10        192              0.271042      31.366608       0.000000       0.369783       0.326500       0.255500       0.268500   -9999.000000
57474     57474     hubei          112.1481       30.3503          119       169     2012      07        11        193              0.267917      31.732819       0.670141       0.369313       0.395000       0.209800       0.289200       0.242000
57474     57474     hubei          112.1481       30.3503          119       169     2012      07        12        194              0.267917      32.738922      10.109050       0.367914   -9999.000000       0.192100   -9999.000000       0.225000
57474     57474     hubei          112.1481       30.3503          119       169     2012      07        13        195              0.371913      30.176239      34.416809       0.382214       0.500000       0.207700   -9999.000000   -9999.000000
57474     57474     hubei          112.1481       30.3503          119       169     2012      07        14        196              0.402391      27.267273       0.663771       0.416476       0.446000   -9999.000000       0.291400       0.634000
57474     57474     hubei          112.1481       30.3503          119       169     2012      07        15        197              0.388958      30.066376      14.231596       0.394589       0.449500       0.231100       0.271800   -9999.000000
57474     57474     hubei          112.1481       30.3503          119       169     2012      07        16        198              0.365542      29.533966       3.032463       0.386121       0.440000       0.185600       0.382200       0.179000
57474     57474     hubei          112.1481       30.3503          119       169     2012      07        17        199              0.345625      29.806305       1.912922       0.382945   -9999.000000   -9999.000000       0.426600   -9999.000000
57474     57474     hubei          112.1481       30.3503          119       169     2012      07        18        200              0.333583      29.999542       6.612739       0.379764       0.437000       0.351500   -9999.000000       0.581000
57474     57474     hubei          112.1481       30.3503          119       169     2012      07        19        201              0.373250      29.531006       2.151302       0.383755       0.454500   -9999.000000   -9999.000000       0.451000
57474     57474     hubei          112.1481       30.3503          119       169     2012      07        20        202              0.343375      29.987213       1.018740       0.389387       0.428000       0.208200       0.344800   -9999.000000
57474     57474     hubei          112.1481       30.3503          119       169     2012      07        21        203              0.313609      31.419006       0.561379       0.381839       0.447500       0.255000       0.372400       0.661000
57474     57474     hubei          112.1481       30.3503          119       169     2012      07        22        204              0.294667      32.670532       2.114767       0.375739   -9999.000000   -9999.000000       0.345900   -9999.000000
57474     57474     hubei          112.1481       30.3503          119       169     2012      07        23        205              0.337417      31.513428      18.534683       0.372317   -9999.000000       0.177500       0.310700       0.601000
57474     57474     hubei          112.1481       30.3503          119       169     2012      07        24        206              0.407125      31.174957       0.000000       0.389829       0.461000       0.241400   -9999.000000       0.395000
57474     57474     hubei          112.1481       30.3503          119       169     2012      07        25        207              0.367792      32.048920       1.812219       0.387273       0.438000       0.204600   -9999.000000   -9999.000000
57474     57474     hubei          112.1481       30.3503          119       169     2012      07        26        208              0.336333      32.496765       0.511371       0.378298       0.418000       0.128300       0.293900       0.376000
57474     57474     hubei          112.1481       30.3503          119       169     2012      07        27        209              0.310875      32.706696       0.483500       0.373164       0.380000   -9999.000000       0.332800   -9999.000000
57474     57474     hubei          112.1481       30.3503          119       169     2012      07        28        210              0.291250      32.827240       0.549690       0.369409   -9999.000000       0.248100       0.336200       0.810000
57474     57474     hubei          112.1481       30.3503          119       169     2012      07        29        211              0.277333      32.799774       0.000000       0.367359       0.404000       0.108300   -9999.000000   -9999.000000
57474     57474     hubei          112.1481       30.3503          119       169     2012      07        30        212              0.268000      33.068878       0.000000       0.364175       0.388500       0.068400   -9999.000000   -9999.000000
57474     57474     hubei          112.1481       30.3503          119       169     2012      07        31        213              0.261875      33.555054       0.000000       0.361759       0.378500       0.055300       0.373500       0.392000
57474     57474     hubei          112.1481       30.3503          119       169     2012      08        01        214              0.258792      33.574219       1.389126       0.359730       0.456000   -9999.000000       0.381800   -9999.000000
57474     57474     hubei          112.1481       30.3503          119       169     2012      08        02        215              0.256583      32.059601       0.000000       0.359247   -9999.000000       0.347600       0.389500       0.650000
57474     57474     hubei          112.1481       30.3503          119       169     2012      08        03        216              0.254667      31.324432       0.000000       0.356969   -9999.000000       0.247500       0.403200   -9999.000000
57474     57474     hubei          112.1481       30.3503          119       169     2012      08        04        217              0.258042      30.833649      13.760786       0.355084       0.498000   -9999.000000   -9999.000000   -9999.000000
57474     57474     hubei          112.1481       30.3503          119       169     2012      08        05        218              0.281542      28.818970       1.313462       0.375096       0.498500       0.407800   -9999.000000       0.889000
57474     57474     hubei          112.1481       30.3503          119       169     2012      08        06        219              0.276042      30.616791       1.451214       0.381653       0.496000   -9999.000000       0.285600   -9999.000000
57474     57474     hubei          112.1481       30.3503          119       169     2012      08        07        220              0.266583      30.755463       0.000000       0.374675       0.477000       0.221600       0.309100       0.446000
57474     57474     hubei          112.1481       30.3503          119       169     2012      08        08        221              0.259375      31.213379       0.000000       0.366803   -9999.000000       0.182500       0.316400   -9999.000000
57474     57474     hubei          112.1481       30.3503          119       169     2012      08        09        222              0.254042      30.743042       0.000000       0.361720       0.478000   -9999.000000       0.312200       0.480000
57474     57474     hubei          112.1481       30.3503          119       169     2012      08        10        223              0.250208      30.881653       0.000000       0.357838       0.461500       0.184900   -9999.000000       0.278000
57474     57474     hubei          112.1481       30.3503          119       169     2012      08        11        224              0.248083      30.752136       1.414301       0.353824       0.451500   -9999.000000   -9999.000000   -9999.000000
57474     57474     hubei          112.1481       30.3503          119       169     2012      08        12        225              0.247000      31.337280       0.441012       0.352193       0.394000       0.171400       0.302700       0.339000
57474     57474     hubei          112.1481       30.3503          119       169     2012      08        13        226              0.339750      32.705200       8.625771       0.349364   -9999.000000       0.232900       0.361200   -9999.000000
57474     57474     hubei          112.1481       30.3503          119       169     2012      08        14        227              0.361167      30.027832       0.000000       0.372776       0.480000   -9999.000000       0.371600       0.319000
57474     57474     hubei          112.1481       30.3503          119       169     2012      08        15        228              0.337083      29.897034       0.000000       0.362917       0.475500       0.361300   -9999.000000   -9999.000000
57474     57474     hubei          112.1481       30.3503          119       169     2012      08        16        229              0.321833      31.050995       0.000000       0.357935       0.434000       0.221200   -9999.000000   -9999.000000
57474     57474     hubei          112.1481       30.3503          119       169     2012      08        17        230              0.302500      30.931244       0.000000       0.353582       0.458000       0.178500       0.350300       0.325000
57474     57474     hubei          112.1481       30.3503          119       169     2012      08        18        231              0.287333      31.888947       0.000000       0.349841       0.408000       0.088900       0.359100   -9999.000000
57474     57474     hubei          112.1481       30.3503          119       169     2012      08        19        232              0.311875      32.948059      25.172939       0.345600   -9999.000000   -9999.000000       0.378300       0.519000
57474     57474     hubei          112.1481       30.3503          119       169     2012      08        20        233              0.413792      32.392273      33.675549       0.373491   -9999.000000       0.320400       0.275900   -9999.000000
57474     57474     hubei          112.1481       30.3503          119       169     2012      08        21        234              0.414667      30.638306       1.142501       0.406780       0.496500       0.340500   -9999.000000       0.789000
57474     57474     hubei          112.1481       30.3503          119       169     2012      08        22        235              0.405833      25.743500       0.000000       0.404528       0.390000   -9999.000000   -9999.000000   -9999.000000
57474     57474     hubei          112.1481       30.3503          119       169     2012      08        23        236              0.388875      24.732880       0.000000       0.385411       0.391000       0.280900       0.256600   -9999.000000
57474     57474     hubei          112.1481       30.3503          119       169     2012      08        24        237              0.364667      25.054413       0.000000       0.377477   -9999.000000   -9999.000000       0.295200       0.356000
57474     57474     hubei          112.1481       30.3503          119       169     2012      08        25        238              0.000000      26.525482       0.000000       0.370434       0.463000       0.151100       0.267000   -9999.000000
57474     57474     hubei          112.1481       30.3503          119       169     2012      08        26        239              0.331792      28.445465       0.584224       0.366337       0.444000       0.189500   -9999.000000       0.735000
57474     57474     hubei          112.1481       30.3503          119       169     2012      08        27        240              0.319417      26.990936       0.000000       0.364543       0.440500   -9999.000000   -9999.000000   -9999.000000
57474     57474     hubei          112.1481       30.3503          119       169     2012      08        28        241              0.308333      28.121765       0.000000       0.360514       0.379000       0.186100       0.232900   -9999.000000
57474     57474     hubei          112.1481       30.3503          119       169     2012      08        29        242              0.300125      29.179169       1.448182       0.357405   -9999.000000   -9999.000000       0.220000       0.526000
57474     57474     hubei          112.1481       30.3503          119       169     2012      08        30        243              0.291250      30.655823       0.000000       0.354385   -9999.000000       0.340500       0.233700   -9999.000000
57474     57474     hubei          112.1481       30.3503          119       169     2012      08        31        244              0.284875      30.803375       0.000000       0.351757       0.443000       0.343100       0.220800       0.786000
57474     57474     hubei          112.1481       30.3503          119       169     2012      09        01        245              0.279208      30.817505       9.694751       0.350403       0.388000   -9999.000000   -9999.000000   -9999.000000
57474     57474     hubei          112.1481       30.3503          119       169     2012      09        02        246              0.418125      31.928650      13.818431       0.355840       0.443500       0.262100   -9999.000000   -9999.000000
57474     57474     hubei          112.1481       30.3503          119       169     2012      09        03        247              0.408167      25.519928       0.000000       0.393880       0.350000       0.246800       0.191200       0.739000
57474     57474     hubei          112.1481       30.3503          119       169     2012      09        04        248              0.388833      26.604156       0.000000       0.373162   -9999.000000   -9999.000000       0.205600   -9999.000000
57474     57474     hubei          112.1481       30.3503          119       169     2012      09        05        249              0.358833      27.282440       0.000000       0.365943       0.375000       0.191900       0.187500       0.472000
57474     57474     hubei          112.1481       30.3503          119       169     2012      09        06        250              0.333250      27.973999       0.000000       0.359475       0.400500   -9999.000000       0.200900   -9999.000000
57474     57474     hubei          112.1481       30.3503          119       169     2012      09        07        251              0.328417      28.316742       5.351541       0.355873       0.403000       0.323400   -9999.000000       0.638000
57474     57474     hubei          112.1481       30.3503          119       169     2012      09        08        252              0.371417      30.001831      17.854534       0.362046       0.428000       0.393400   -9999.000000       0.810000
57474     57474     hubei          112.1481       30.3503          119       169     2012      09        09        253              0.408167      26.102417       0.081717       0.382764   -9999.000000   -9999.000000       0.197700   -9999.000000
57474     57474     hubei          112.1481       30.3503          119       169     2012      09        10        254              0.396667      25.736023       0.000000       0.382133       0.456000       0.342400       0.224900       0.584000
57474     57474     hubei          112.1481       30.3503          119       169     2012      09        11        255              0.387500      26.944580       0.989885       0.372746       0.347000   -9999.000000       0.228800   -9999.000000
57474     57474     hubei          112.1481       30.3503          119       169     2012      09        12        256              0.403750      26.426178       6.669765       0.368757       0.416000       0.304500   -9999.000000       0.890000
57474     57474     hubei          112.1481       30.3503          119       169     2012      09        13        257              0.403696      22.627136       0.000000       0.380878       0.277000       0.226200   -9999.000000   -9999.000000
57474     57474     hubei          112.1481       30.3503          119       169     2012      09        14        258              0.387000      22.305176       0.133930       0.371719       0.279000   -9999.000000       0.206800   -9999.000000
57474     57474     hubei          112.1481       30.3503          119       169     2012      09        15        259              0.361333      23.628876       0.424619       0.364139   -9999.000000       0.240900       0.192400       0.506000
57474     57474     hubei          112.1481       30.3503          119       169     2012      09        16        260              0.345875      23.730652       0.000000       0.359443       0.356000   -9999.000000       0.220000   -9999.000000
57474     57474     hubei          112.1481       30.3503          119       169     2012      09        17        261              0.332792      23.115997       0.000000       0.358658       0.297000       0.270000       0.156300       0.693000
57474     57474     hubei          112.1481       30.3503          119       169     2012      09        18        262              0.322083      23.936432       0.000000       0.356046       0.279000       0.170700   -9999.000000   -9999.000000
57474     57474     hubei          112.1481       30.3503          119       169     2012      09        19        263              0.313292      25.059662       0.000000       0.353694       0.287000   -9999.000000   -9999.000000       0.680000
57474     57474     hubei          112.1481       30.3503          119       169     2012      09        20        264              0.309167      26.205658       5.514481       0.350469   -9999.000000       0.267100       0.163800       0.576000
57474     57474     hubei          112.1481       30.3503          119       169     2012      09        21        265              0.330792      26.925354       2.313151       0.355441   -9999.000000       0.161600       0.167200   -9999.000000
57474     57474     hubei          112.1481       30.3503          119       169     2012      09        22        266              0.329625      23.380829       1.443100       0.369135       0.316000       0.175700       0.159400       0.712000
57474     57474     hubei          112.1481       30.3503          119       169     2012      09        23        267              0.331792      26.272797       0.115623       0.361803       0.332500       0.224300       0.170100   -9999.000000
57474     57474     hubei          112.1481       30.3503          119       169     2012      09        24        268              0.327250      24.764832       0.000000       0.362574       0.291000   -9999.000000   -9999.000000       0.702000
57474     57474     hubei          112.1481       30.3503          119       169     2012      09        25        269              0.321417      26.059723       0.000000       0.357848   -9999.000000       0.234100   -9999.000000   -9999.000000
57474     57474     hubei          112.1481       30.3503          119       169     2012      09        26        270              0.316708      25.900391       0.000000       0.355471   -9999.000000       0.342100       0.128800   -9999.000000
57474     57474     hubei          112.1481       30.3503          119       169     2012      09        27        271              0.312500      25.060028       0.000000       0.354355       0.316000   -9999.000000       0.144600       0.550000
57474     57474     hubei          112.1481       30.3503          119       169     2012      09        28        272              0.298875      25.770874       0.360110       0.349833       0.249000   -9999.000000       0.146300   -9999.000000
57474     57474     hubei          112.1481       30.3503          119       169     2012      09        29        273              0.294458      22.600037       0.000000       0.344548       0.250000   -9999.000000   -9999.000000       0.609000
57474     57474     hubei          112.1481       30.3503          119       169     2012      09        30        274              0.291167      22.465546       0.000000       0.342961       0.297000       0.128900   -9999.000000   -9999.000000
57474     57474     hubei          112.1481       30.3503          119       169     2012      10        01        275              0.288458      21.284882       4.462111       0.345158   -9999.000000   -9999.000000       0.111800   -9999.000000
57474     57474     hubei          112.1481       30.3503          119       169     2012      10        02        276              0.286292      22.675781       0.000000       0.341984       0.271000   -9999.000000       0.109300       0.637000
57474     57474     hubei          112.1481       30.3503          119       169     2012      10        03        277              0.285000      23.529388       0.533425       0.340130       0.253000       0.070000       0.110700   -9999.000000
57474     57474     hubei          112.1481       30.3503          119       169     2012      10        04        278              0.286208      22.227386       2.474485       0.341794       0.292500   -9999.000000       0.112600       0.532000
57474     57474     hubei          112.1481       30.3503          119       169     2012      10        05        279              0.310208      22.104431       8.556885       0.346705   -9999.000000       0.333700   -9999.000000   -9999.000000
57474     57474     hubei          112.1481       30.3503          119       169     2012      10        06        280              0.320042      19.558868       1.366283       0.373144   -9999.000000       0.423700   -9999.000000       0.865000
57474     57474     hubei          112.1481       30.3503          119       169     2012      10        07        281              0.330167      21.111969       1.801798       0.364349       0.332000   -9999.000000       0.116600       1.000000
57474     57474     hubei          112.1481       30.3503          119       169     2012      10        08        282              0.331333      20.324005       0.246560       0.367535       0.341000       0.352200       0.120200   -9999.000000
57474     57474     hubei          112.1481       30.3503          119       169     2012      10        09        283              0.328875      19.858673       0.000000       0.363875       0.244000   -9999.000000       0.114400       0.581000
57474     57474     hubei          112.1481       30.3503          119       169     2012      10        10        284              0.321333      22.529938       0.000000       0.358631       0.265000       0.125800       0.109200   -9999.000000
57474     57474     hubei          112.1481       30.3503          119       169     2012      10        11        285              0.315583      21.932739       0.000000       0.353682       0.208000       0.239300   -9999.000000       0.517000
57474     57474     hubei          112.1481       30.3503          119       169     2012      10        12        286              0.312250      21.809296       1.276343       0.353928   -9999.000000   -9999.000000   -9999.000000   -9999.000000
57474     57474     hubei          112.1481       30.3503          119       169     2012      10        13        287              0.318042      20.283020       0.702698       0.355981   -9999.000000       0.303700       0.097700   -9999.000000
57474     57474     hubei          112.1481       30.3503          119       169     2012      10        14        288              0.325083      19.063263       5.816724       0.360716       0.215000       0.239100       0.117500       0.446000
57474     57474     hubei          112.1481       30.3503          119       169     2012      10        15        289              0.380292      20.571442      14.679650       0.365459       0.251500       0.332200       0.159600   -9999.000000
57474     57474     hubei          112.1481       30.3503          119       169     2012      10        16        290              0.398333      19.248505      12.171541       0.388305       0.251000       0.281500   -9999.000000       0.876000
57474     57474     hubei          112.1481       30.3503          119       169     2012      10        17        291              0.390958      17.792389       0.582658       0.400099   -9999.000000   -9999.000000   -9999.000000   -9999.000000
57474     57474     hubei          112.1481       30.3503          119       169     2012      10        18        292              0.387417      18.543304       0.876887       0.380312   -9999.000000       0.710300       0.134200       0.601000
57474     57474     hubei          112.1481       30.3503          119       169     2012      10        19        293              0.384739      19.642273       0.000000       0.373601       0.220500       0.405200       0.135600       0.613000
57474     57474     hubei          112.1481       30.3503          119       169     2012      10        20        294              0.381833      21.222992       0.711840       0.370203       0.212500   -9999.000000       0.140700   -9999.000000
57474     57474     hubei          112.1481       30.3503          119       169     2012      10        21        295              0.387000      22.729187       1.936789       0.367788       0.219000       0.537600       0.142900       0.627000
57474     57474     hubei          112.1481       30.3503          119       169     2012      10        22        296              0.392042      22.261810       0.822544       0.369134   -9999.000000   -9999.000000   -9999.000000   -9999.000000
57474     57474     hubei          112.1481       30.3503          119       169     2012      10        23        297              0.388958      17.604309       1.184824       0.365934   -9999.000000       0.159600   -9999.000000       0.550000
57474     57474     hubei          112.1481       30.3503          119       169     2012      10        24        298              0.396167      18.116913       0.279644       0.364757   -9999.000000       0.219100       0.098600   -9999.000000
57474     57474     hubei          112.1481       30.3503          119       169     2012      10        25        299              0.000000      16.037201      15.019914       0.366418       0.259000   -9999.000000       0.084100   -9999.000000
57474     57474     hubei          112.1481       30.3503          119       169     2012      10        26        300              0.415042      16.043457      32.092632       0.379981   -9999.000000       0.306500       0.141700       1.000000
57474     57474     hubei          112.1481       30.3503          119       169     2012      10        27        301              0.407042      15.968903       0.401117       0.415685       0.233000   -9999.000000   -9999.000000   -9999.000000
57474     57474     hubei          112.1481       30.3503          119       169     2012      10        28        302              0.000000      18.829926      18.010080       0.391105   -9999.000000       0.218200   -9999.000000       0.737000
57474     57474     hubei          112.1481       30.3503          119       169     2012      10        29        303              0.422458      20.920837      26.041836       0.393310   -9999.000000       0.325000       0.175000   -9999.000000
57474     57474     hubei          112.1481       30.3503          119       169     2012      10        30        304              0.417667      16.916016       0.000000       0.418932   -9999.000000   -9999.000000       0.152600   -9999.000000
57474     57474     hubei          112.1481       30.3503          119       169     2012      10        31        305              0.411375      16.428375       0.000000       0.394315   -9999.000000       0.339800       0.152200       0.837000
57474     57474     hubei          112.1481       30.3503          119       169     2012      11        01        306              0.408042      17.372711       0.000000       0.386247   -9999.000000       0.320400       0.156800   -9999.000000
57474     57474     hubei          112.1481       30.3503          119       169     2012      11        02        307              0.407333      16.548004       0.500960       0.382374   -9999.000000       0.310200   -9999.000000       0.608000
57474     57474     hubei          112.1481       30.3503          119       169     2012      11        03        308              0.409375      18.042603       3.900117       0.378752   -9999.000000       0.283200   -9999.000000   -9999.000000
57474     57474     hubei          112.1481       30.3503          119       169     2012      11        04        309              0.405261      13.933014       0.000000       0.385427   -9999.000000   -9999.000000       0.139000       0.620000
57474     57474     hubei          112.1481       30.3503          119       169     2012      11        05        310              0.402250      14.307861       0.000000       0.378953   -9999.000000       0.494600       0.142400       0.817000
57474     57474     hubei          112.1481       30.3503          119       169     2012      11        06        311              0.401500      14.045349       0.343879       0.377239   -9999.000000       0.279700       0.137700   -9999.000000
57474     57474     hubei          112.1481       30.3503          119       169     2012      11        07        312              0.397208      14.683075       0.340801       0.375373       0.238000   -9999.000000       0.153500       0.623000
57474     57474     hubei          112.1481       30.3503          119       169     2012      11        08        313              0.395667      13.504486       0.496499       0.376246   -9999.000000       0.438500   -9999.000000   -9999.000000
57474     57474     hubei          112.1481       30.3503          119       169     2012      11        09        314              0.402208      14.096497       2.424856       0.376774   -9999.000000   -9999.000000   -9999.000000       0.845000
57474     57474     hubei          112.1481       30.3503          119       169     2012      11        10        315              0.399333      12.489105       0.000000       0.382708   -9999.000000       0.438800       0.116300   -9999.000000
57474     57474     hubei          112.1481       30.3503          119       169     2012      11        11        316              0.394292      13.417206       0.000000       0.378428   -9999.000000       0.168800       0.140000       0.470000
57474     57474     hubei          112.1481       30.3503          119       169     2012      11        12        317              0.386792      12.783813       0.342237       0.375940   -9999.000000   -9999.000000       0.161100       0.544000
57474     57474     hubei          112.1481       30.3503          119       169     2012      11        13        318              0.000000      13.051025       0.000000       0.375325   -9999.000000       0.234100   -9999.000000   -9999.000000
57474     57474     hubei          112.1481       30.3503          119       169     2012      11        14        319              0.369583      15.627594       0.572577       0.374680   -9999.000000       0.245300   -9999.000000       0.600000
57474     57474     hubei          112.1481       30.3503          119       169     2012      11        15        320              0.400458      14.304108       7.378143       0.374809   -9999.000000       0.129400       0.174300   -9999.000000
57474     57474     hubei          112.1481       30.3503          119       169     2012      11        16        321              0.406292       9.774780       1.326721       0.388799   -9999.000000       0.211800       0.161300       0.901000
57474     57474     hubei          112.1481       30.3503          119       169     2012      11        17        322              0.000000      10.237610       0.000000       0.384663   -9999.000000   -9999.000000       0.169800       0.783000
57474     57474     hubei          112.1481       30.3503          119       169     2012      11        18        323              0.401292      10.612915       0.000000       0.381134   -9999.000000       0.359200       0.163500   -9999.000000
57474     57474     hubei          112.1481       30.3503          119       169     2012      11        19        324              0.400333      11.761353       0.371053       0.379314   -9999.000000       0.296100   -9999.000000       0.785000
57474     57474     hubei          112.1481       30.3503          119       169     2012      11        20        325              0.399333      12.893646       1.412051       0.377964   -9999.000000       0.229600   -9999.000000   -9999.000000
57474     57474     hubei          112.1481       30.3503          119       169     2012      11        21        326              0.398708      11.389648       0.120638       0.380585   -9999.000000       0.395800       0.123800       0.709000
57474     57474     hubei          112.1481       30.3503          119       169     2012      11        22        327              0.398917      11.773010       1.406728       0.379163   -9999.000000   -9999.000000       0.137000   -9999.000000
57474     57474     hubei          112.1481       30.3503          119       169     2012      11        23        328              0.395417      10.649719       0.000000       0.381790   -9999.000000       0.258100       0.127500   -9999.000000
57474     57474     hubei          112.1481       30.3503          119       169     2012      11        24        329              0.395542       8.679138       1.883431       0.378459   -9999.000000       0.262300       0.141900       0.918000
57474     57474     hubei          112.1481       30.3503          119       169     2012      11        25        330              0.398958       8.820190       0.000000       0.380662   -9999.000000   -9999.000000   -9999.000000   -9999.000000
57474     57474     hubei          112.1481       30.3503          119       169     2012      11        26        331              0.397375       8.406860       0.000000       0.380371   -9999.000000       0.373800   -9999.000000       0.579000
57474     57474     hubei          112.1481       30.3503          119       169     2012      11        27        332              0.391708      10.179230       0.000000       0.377419   -9999.000000   -9999.000000       0.102800   -9999.000000
57474     57474     hubei          112.1481       30.3503          119       169     2012      11        28        333              0.385875       9.810303       0.000000       0.376706   -9999.000000       0.352600       0.121000   -9999.000000
57474     57474     hubei          112.1481       30.3503          119       169     2012      11        29        334              0.379958      10.456146       0.368479       0.375831   -9999.000000       0.161500       0.134600       0.763000
57474     57474     hubei          112.1481       30.3503          119       169     2012      11        30        335              0.382917       8.757843       1.355024       0.376302   -9999.000000   -9999.000000   -9999.000000   -9999.000000
57474     57474     hubei          112.1481       30.3503          119       169     2012      12        01        336              0.397208       8.755920       2.489981       0.378146   -9999.000000       0.260700   -9999.000000       0.791000
57474     57474     hubei          112.1481       30.3503          119       169     2012      12        02        337              0.396792       5.523651       0.000000       0.383430   -9999.000000       0.275300       0.120000   -9999.000000
57474     57474     hubei          112.1481       30.3503          119       169     2012      12        03        338              0.394750       7.045532       0.000000       0.379787   -9999.000000       0.328100       0.129600       0.570000
57474     57474     hubei          112.1481       30.3503          119       169     2012      12        04        339              0.392583       7.938507       0.000000       0.378429   -9999.000000       0.233700       0.131700       0.644000
57474     57474     hubei          112.1481       30.3503          119       169     2012      12        05        340              0.389583       7.277130       0.000000       0.378003   -9999.000000   -9999.000000       0.131900   -9999.000000
57474     57474     hubei          112.1481       30.3503          119       169     2012      12        06        341              0.383417       9.255768       4.522725       0.376532   -9999.000000       0.313300   -9999.000000       0.492000
57474     57474     hubei          112.1481       30.3503          119       169     2012      12        07        342              0.378833       9.169373       0.293127       0.376296   -9999.000000       0.150100   -9999.000000   -9999.000000
57474     57474     hubei          112.1481       30.3503          119       169     2012      12        08        343              0.371958      10.512238       0.000000       0.375443   -9999.000000   -9999.000000       0.105700       0.537000
57474     57474     hubei          112.1481       30.3503          119       169     2012      12        09        344              0.361250       9.714447       0.000000       0.374422   -9999.000000       0.303400       0.129700   -9999.000000
57474     57474     hubei          112.1481       30.3503          119       169     2012      12        10        345              0.367125       7.903381       2.780845       0.373864   -9999.000000   -9999.000000       0.134000       0.649000
57474     57474     hubei          112.1481       30.3503          119       169     2012      12        11        346              0.372500       6.867889       0.000000       0.379355   -9999.000000       0.366500   -9999.000000       0.533000
57474     57474     hubei          112.1481       30.3503          119       169     2012      12        12        347              0.374875       7.091858       7.867341       0.377445   -9999.000000       0.347400   -9999.000000   -9999.000000
57474     57474     hubei          112.1481       30.3503          119       169     2012      12        13        348              0.405833       6.756744       5.276520       0.382883   -9999.000000   -9999.000000       0.144100       0.878000
57474     57474     hubei          112.1481       30.3503          119       169     2012      12        14        349              0.401833       6.093079       2.315238       0.395357   -9999.000000       0.328200       0.129600   -9999.000000
57474     57474     hubei          112.1481       30.3503          119       169     2012      12        15        350              0.000000       5.113556       0.000000       0.389414   -9999.000000   -9999.000000       0.137400       0.786000
57474     57474     hubei          112.1481       30.3503          119       169     2012      12        16        351              0.398708       6.519409       1.584424       0.384304   -9999.000000       0.246800       0.143700       0.729000
57474     57474     hubei          112.1481       30.3503          119       169     2012      12        17        352              0.404958       6.591217       9.264110       0.381719   -9999.000000       0.186400   -9999.000000   -9999.000000
57474     57474     hubei          112.1481       30.3503          119       169     2012      12        18        353              0.402083       5.414459       0.000000       0.393916   -9999.000000   -9999.000000   -9999.000000       0.645000
57474     57474     hubei          112.1481       30.3503          119       169     2012      12        19        354              0.401833       5.256744       1.657168       0.386680   -9999.000000       0.270100       0.149000   -9999.000000
57474     57474     hubei          112.1481       30.3503          119       169     2012      12        20        355              0.000000       5.240509       0.695209       0.385781   -9999.000000       0.445400       0.143100       0.747000
57474     57474     hubei          112.1481       30.3503          119       169     2012      12        21        356              0.401583       2.915863       0.455325       0.383561   -9999.000000       0.188900       0.145800   -9999.000000
57474     57474     hubei          112.1481       30.3503          119       169     2012      12        22        357              0.399375       3.927704       0.000000       0.381913   -9999.000000       0.284400       0.149800   -9999.000000
57474     57474     hubei          112.1481       30.3503          119       169     2012      12        23        358              0.396417       4.707520       0.000000       0.379811   -9999.000000   -9999.000000   -9999.000000       0.336000
57474     57474     hubei          112.1481       30.3503          119       169     2012      12        24        359              0.392000       3.939087       0.000000       0.377073   -9999.000000       0.228500   -9999.000000   -9999.000000
57474     57474     hubei          112.1481       30.3503          119       169     2012      12        25        360              0.388167       5.503876       0.556471       0.377937   -9999.000000   -9999.000000       0.100200       0.389000
57474     57474     hubei          112.1481       30.3503          119       169     2012      12        26        361              0.000000       2.134430       0.213588       0.368327   -9999.000000       0.166100       0.129600   -9999.000000
57474     57474     hubei          112.1481       30.3503          119       169     2012      12        27        362              0.385600       1.083954       1.558179       0.349170   -9999.000000       0.174600       0.136200   -9999.000000
57474     57474     hubei          112.1481       30.3503          119       169     2012      12        28        363              0.383000       1.931641       9.798920       0.365171   -9999.000000   -9999.000000   -9999.000000       0.837000
57474     57474     hubei          112.1481       30.3503          119       169     2012      12        29        364              0.000000       2.516876       1.807717       0.378948   -9999.000000       0.224600   -9999.000000   -9999.000000
57474     57474     hubei          112.1481       30.3503          119       169     2012      12        30        365              0.000000       1.838959       0.347716       0.380711   -9999.000000       0.307700       0.104500       0.024000
57474     57474     hubei          112.1481       30.3503          119       169     2012      12        31        366              0.393200       2.861267       0.350426       0.372099   -9999.000000   -9999.000000       0.119800   -9999.000000
