# Supplementary material for: Research on Fusing Multisatellite Soil Moisture Data Based on Bayesian Model Averaging
Source: Hindawi journal article supplement (doi:10.1155/2018/9310838), 2018-06-25
Supplement: f1 [file 9310838.f1.zip › 2012_sm00-10cm_daily_ZDB_ZHY_57475_366days_allin.txt]

57475     57475     hubei          112.5400       30.2397          119       170     2012      01        01        001              0.000000   -9999.000000       0.000000   -9999.000000   -9999.000000   -9999.000000       0.082900   -9999.000000
57475     57475     hubei          112.5400       30.2397          119       170     2012      01        02        002              0.000000       5.237030       6.380709       0.348407   -9999.000000       0.175300   -9999.000000       0.549000
57475     57475     hubei          112.5400       30.2397          119       170     2012      01        03        003              0.000000       4.697784       0.000000       0.349625   -9999.000000       0.378300   -9999.000000       0.172000
57475     57475     hubei          112.5400       30.2397          119       170     2012      01        04        004              0.000000       2.705597       0.000000       0.338616   -9999.000000   -9999.000000       0.080000   -9999.000000
57475     57475     hubei          112.5400       30.2397          119       170     2012      01        05        005              0.000000       3.853973       0.000000       0.342414   -9999.000000       0.125800       0.070400       0.095000
57475     57475     hubei          112.5400       30.2397          119       170     2012      01        06        006              0.000000       2.414032       0.000000       0.333561   -9999.000000   -9999.000000       0.082100   -9999.000000
57475     57475     hubei          112.5400       30.2397          119       170     2012      01        07        007              0.000000       4.318939       0.000000       0.341171   -9999.000000   -9999.000000       0.084200       0.299000
57475     57475     hubei          112.5400       30.2397          119       170     2012      01        08        008              0.000000       2.345398       0.000000       0.340615   -9999.000000       0.158600   -9999.000000   -9999.000000
57475     57475     hubei          112.5400       30.2397          119       170     2012      01        09        009              0.000000       2.832977       0.000000       0.343426   -9999.000000   -9999.000000   -9999.000000   -9999.000000
57475     57475     hubei          112.5400       30.2397          119       170     2012      01        10        010              0.000000       4.432312       0.000000       0.345680   -9999.000000       0.094800       0.068000       0.334000
57475     57475     hubei          112.5400       30.2397          119       170     2012      01        11        011              0.000000       4.141235       0.000000       0.345376   -9999.000000   -9999.000000       0.081700   -9999.000000
57475     57475     hubei          112.5400       30.2397          119       170     2012      01        12        012              0.000000       3.681305       0.000000       0.345310   -9999.000000       0.135200       0.082400       0.355000
57475     57475     hubei          112.5400       30.2397          119       170     2012      01        13        013              0.000000       3.219696       3.871710       0.345694   -9999.000000       0.221700       0.079200   -9999.000000
57475     57475     hubei          112.5400       30.2397          119       170     2012      01        14        014              0.000000       3.719147       5.942929       0.350177   -9999.000000   -9999.000000   -9999.000000   -9999.000000
57475     57475     hubei          112.5400       30.2397          119       170     2012      01        15        015              0.000000       2.759338       0.699292       0.358161   -9999.000000       0.289100   -9999.000000       1.000000
57475     57475     hubei          112.5400       30.2397          119       170     2012      01        16        016              0.000000       3.492310       0.000000       0.360206   -9999.000000   -9999.000000       0.069900   -9999.000000
57475     57475     hubei          112.5400       30.2397          119       170     2012      01        17        017              0.000000       5.522217       2.234859       0.353028   -9999.000000       0.375500       0.085600       0.800000
57475     57475     hubei          112.5400       30.2397          119       170     2012      01        18        018              0.000000       4.054901       0.460033       0.353599   -9999.000000       0.252500       0.083000   -9999.000000
57475     57475     hubei          112.5400       30.2397          119       170     2012      01        19        019              0.000000       4.752594       1.601749       0.354510   -9999.000000   -9999.000000   -9999.000000       0.591000
57475     57475     hubei          112.5400       30.2397          119       170     2012      01        20        020              0.000000       4.130005       8.129185       0.352949   -9999.000000       0.226200   -9999.000000       0.961000
57475     57475     hubei          112.5400       30.2397          119       170     2012      01        21        021              0.000000       3.617371       2.664099       0.366535   -9999.000000       0.285900       0.065700   -9999.000000
57475     57475     hubei          112.5400       30.2397          119       170     2012      01        22        022              0.000000       1.518555       0.765935       0.336448   -9999.000000   -9999.000000       0.052300       0.003000
57475     57475     hubei          112.5400       30.2397          119       170     2012      01        23        023              0.000000       0.876129       1.002163       0.303402   -9999.000000       0.361100       0.084800   -9999.000000
57475     57475     hubei          112.5400       30.2397          119       170     2012      01        24        024              0.000000       1.638458       0.566464       0.320035   -9999.000000   -9999.000000   -9999.000000       0.236000
57475     57475     hubei          112.5400       30.2397          119       170     2012      01        25        025              0.000000       3.275940       0.000000       0.337850   -9999.000000   -9999.000000   -9999.000000   -9999.000000
57475     57475     hubei          112.5400       30.2397          119       170     2012      01        26        026              0.000000       4.099213       0.597807       0.342487   -9999.000000       0.112500   -9999.000000   -9999.000000
57475     57475     hubei          112.5400       30.2397          119       170     2012      01        27        027              0.000000       5.704346       0.000000       0.346685   -9999.000000       0.102100       0.072200       0.133000
57475     57475     hubei          112.5400       30.2397          119       170     2012      01        28        028              0.000000       4.454803       0.000000       0.348055   -9999.000000       0.026900       0.079200   -9999.000000
57475     57475     hubei          112.5400       30.2397          119       170     2012      01        29        029              0.000000       6.398743       0.207933       0.346789   -9999.000000   -9999.000000       0.078000       0.483000
57475     57475     hubei          112.5400       30.2397          119       170     2012      01        30        030              0.000000       4.034637       0.000000       0.347373   -9999.000000       0.182700       0.075500   -9999.000000
57475     57475     hubei          112.5400       30.2397          119       170     2012      01        31        031              0.000000       5.198822       0.000000       0.346497   -9999.000000       0.140100   -9999.000000       0.434000
57475     57475     hubei          112.5400       30.2397          119       170     2012      02        01        032              0.000000       7.247284       0.000000       0.345805   -9999.000000   -9999.000000   -9999.000000       0.249000
57475     57475     hubei          112.5400       30.2397          119       170     2012      02        02        033              0.000000       4.871857       0.084421       0.345244   -9999.000000       0.411100       0.045800   -9999.000000
57475     57475     hubei          112.5400       30.2397          119       170     2012      02        03        034              0.000000       3.052429       0.000000       0.339759   -9999.000000   -9999.000000       0.079800       0.053000
57475     57475     hubei          112.5400       30.2397          119       170     2012      02        04        035              0.000000       5.872528       0.000000       0.343327   -9999.000000       0.388800       0.075200   -9999.000000
57475     57475     hubei          112.5400       30.2397          119       170     2012      02        05        036              0.000000       4.485474       0.224065       0.346065   -9999.000000       0.170100   -9999.000000       0.424000
57475     57475     hubei          112.5400       30.2397          119       170     2012      02        06        037              0.000000       4.182129       0.191546       0.347112   -9999.000000   -9999.000000   -9999.000000   -9999.000000
57475     57475     hubei          112.5400       30.2397          119       170     2012      02        07        038              0.000000       4.878510       0.000000       0.347149   -9999.000000       0.132800       0.087900   -9999.000000
57475     57475     hubei          112.5400       30.2397          119       170     2012      02        08        039              0.000000       4.700989       0.000000       0.343133   -9999.000000   -9999.000000       0.089900       0.287000
57475     57475     hubei          112.5400       30.2397          119       170     2012      02        09        040              0.000000       5.124023       0.000000       0.343380   -9999.000000   -9999.000000       0.088800   -9999.000000
57475     57475     hubei          112.5400       30.2397          119       170     2012      02        10        041              0.193125       2.946167       0.000000       0.341011   -9999.000000       0.126600       0.084400       0.381000
57475     57475     hubei          112.5400       30.2397          119       170     2012      02        11        042              0.193167       5.277222       0.000000       0.342316   -9999.000000   -9999.000000   -9999.000000   -9999.000000
57475     57475     hubei          112.5400       30.2397          119       170     2012      02        12        043              0.191792       7.146088       0.490645       0.342443   -9999.000000       0.103400   -9999.000000   -9999.000000
57475     57475     hubei          112.5400       30.2397          119       170     2012      02        13        044              0.191583       5.468231       0.000000       0.344683   -9999.000000       0.207200   -9999.000000       0.233000
57475     57475     hubei          112.5400       30.2397          119       170     2012      02        14        045              0.192000       4.770538       1.609917       0.345272   -9999.000000   -9999.000000       0.099900   -9999.000000
57475     57475     hubei          112.5400       30.2397          119       170     2012      02        15        046              0.192750       4.424957       0.340796       0.348431   -9999.000000       0.017400       0.098200       0.426000
57475     57475     hubei          112.5400       30.2397          119       170     2012      02        16        047              0.193417       4.417236       0.000000       0.348467   -9999.000000   -9999.000000       0.092600   -9999.000000
57475     57475     hubei          112.5400       30.2397          119       170     2012      02        17        048              0.193875       7.071228       0.000000       0.345950   -9999.000000       0.105600   -9999.000000       0.026000
57475     57475     hubei          112.5400       30.2397          119       170     2012      02        18        049              0.193667       7.203522       0.000000       0.343800   -9999.000000   -9999.000000   -9999.000000       0.135000
57475     57475     hubei          112.5400       30.2397          119       170     2012      02        19        050              0.193958       6.381439       0.029121       0.342684   -9999.000000   -9999.000000       0.081700   -9999.000000
57475     57475     hubei          112.5400       30.2397          119       170     2012      02        20        051              0.192435       8.409943       0.842691       0.341118   -9999.000000       0.135100       0.085900       0.238000
57475     57475     hubei          112.5400       30.2397          119       170     2012      02        21        052              0.191417       7.290344       1.657210       0.343289   -9999.000000   -9999.000000   -9999.000000   -9999.000000
57475     57475     hubei          112.5400       30.2397          119       170     2012      02        22        053              0.227292       7.872589       2.532001       0.345919   -9999.000000       0.473800   -9999.000000       0.360000
57475     57475     hubei          112.5400       30.2397          119       170     2012      02        23        054              0.220125       8.617157       0.833360       0.353322   -9999.000000       0.305700   -9999.000000   -9999.000000
57475     57475     hubei          112.5400       30.2397          119       170     2012      02        24        055              0.217708       6.634033       0.000000       0.349823   -9999.000000   -9999.000000       0.087000   -9999.000000
57475     57475     hubei          112.5400       30.2397          119       170     2012      02        25        056              0.218833       4.777618       2.319602       0.347093   -9999.000000       0.114500       0.084500       0.374000
57475     57475     hubei          112.5400       30.2397          119       170     2012      02        26        057              0.219083       3.927124       0.000000       0.350389   -9999.000000   -9999.000000       0.079500   -9999.000000
57475     57475     hubei          112.5400       30.2397          119       170     2012      02        27        058              0.217304       5.952515       0.000000       0.346253   -9999.000000       0.158500   -9999.000000       0.337000
57475     57475     hubei          112.5400       30.2397          119       170     2012      02        28        059              0.217417       5.302521       0.474034       0.344792   -9999.000000       0.325200   -9999.000000   -9999.000000
57475     57475     hubei          112.5400       30.2397          119       170     2012      02        29        060              0.000000   -9999.000000       0.000000   -9999.000000   -9999.000000   -9999.000000   -9999.000000   -9999.000000
57475     57475     hubei          112.5400       30.2397          119       170     2012      03        01        061              0.216375       7.541565       0.000000       0.344010   -9999.000000       0.129700       0.064600       0.073000
57475     57475     hubei          112.5400       30.2397          119       170     2012      03        02        062              0.226458       7.798828      11.647434       0.342865   -9999.000000       0.221700       0.094000   -9999.000000
57475     57475     hubei          112.5400       30.2397          119       170     2012      03        03        063              0.276208       7.140594       4.345530       0.356046   -9999.000000       0.149700       0.096700       1.000000
57475     57475     hubei          112.5400       30.2397          119       170     2012      03        04        064              0.258250       6.072449       0.357975       0.365387   -9999.000000       0.055500       0.090300   -9999.000000
57475     57475     hubei          112.5400       30.2397          119       170     2012      03        05        065              0.249783       4.772949       0.000000       0.357951   -9999.000000   -9999.000000   -9999.000000       0.465000
57475     57475     hubei          112.5400       30.2397          119       170     2012      03        06        066              0.248083       8.390808       1.457762       0.350949   -9999.000000       0.139600   -9999.000000   -9999.000000
57475     57475     hubei          112.5400       30.2397          119       170     2012      03        07        067              0.000000       7.433655       6.225078       0.351593   -9999.000000       0.194300       0.089300   -9999.000000
57475     57475     hubei          112.5400       30.2397          119       170     2012      03        08        068              0.291958       6.917694       4.539747       0.361175   -9999.000000   -9999.000000       0.103400       0.428000
57475     57475     hubei          112.5400       30.2397          119       170     2012      03        09        069              0.267750       5.855225       1.099576       0.363198   -9999.000000       0.191900       0.099400   -9999.000000
57475     57475     hubei          112.5400       30.2397          119       170     2012      03        10        070              0.261667       6.697937       0.000000       0.357313   -9999.000000   -9999.000000   -9999.000000       0.457000
57475     57475     hubei          112.5400       30.2397          119       170     2012      03        11        071              0.257917      10.022552       0.000000       0.350372   -9999.000000       0.455400   -9999.000000   -9999.000000
57475     57475     hubei          112.5400       30.2397          119       170     2012      03        12        072              0.255667       9.392792       0.474299       0.347954   -9999.000000       0.311700       0.094000   -9999.000000
57475     57475     hubei          112.5400       30.2397          119       170     2012      03        13        073              0.253636      10.300598       0.383199       0.346070   -9999.000000   -9999.000000       0.094400       0.110000
57475     57475     hubei          112.5400       30.2397          119       170     2012      03        14        074              0.253042      13.061798       1.205539       0.344191       0.197000       0.090200       0.107600   -9999.000000
57475     57475     hubei          112.5400       30.2397          119       170     2012      03        15        075              0.254875      13.899078       0.000000       0.344718   -9999.000000   -9999.000000       0.108700       0.057000
57475     57475     hubei          112.5400       30.2397          119       170     2012      03        16        076              0.252870      10.855499       0.789129       0.346053   -9999.000000   -9999.000000   -9999.000000   -9999.000000
57475     57475     hubei          112.5400       30.2397          119       170     2012      03        17        077              0.259000      10.994720       0.604311       0.345615   -9999.000000       0.119600   -9999.000000       0.205000
57475     57475     hubei          112.5400       30.2397          119       170     2012      03        18        078              0.254667      12.213959       1.745701       0.347274   -9999.000000   -9999.000000       0.090800       0.037000
57475     57475     hubei          112.5400       30.2397          119       170     2012      03        19        079              0.253917      14.259796       0.196181       0.347631   -9999.000000       0.135500       0.119800   -9999.000000
57475     57475     hubei          112.5400       30.2397          119       170     2012      03        20        080              0.252565       7.713043       0.040355       0.347235   -9999.000000       0.295300       0.127600       0.224000
57475     57475     hubei          112.5400       30.2397          119       170     2012      03        21        081              0.259625       7.746368      17.943344       0.345544   -9999.000000       0.049900       0.128000   -9999.000000
57475     57475     hubei          112.5400       30.2397          119       170     2012      03        22        082              0.454583       9.004120      35.239632       0.360094   -9999.000000       0.171800   -9999.000000       0.537000
57475     57475     hubei          112.5400       30.2397          119       170     2012      03        23        083              0.370417       7.526917       0.000000       0.399595   -9999.000000   -9999.000000   -9999.000000   -9999.000000
57475     57475     hubei          112.5400       30.2397          119       170     2012      03        24        084              0.312667      12.720856       0.324662       0.369876   -9999.000000       0.261300   -9999.000000   -9999.000000
57475     57475     hubei          112.5400       30.2397          119       170     2012      03        25        085              0.000000      14.959686       0.317256       0.357565   -9999.000000       0.167500       0.121200       0.142000
57475     57475     hubei          112.5400       30.2397          119       170     2012      03        26        086              0.298917      17.133636       0.035998       0.351536       0.171000   -9999.000000       0.139700   -9999.000000
57475     57475     hubei          112.5400       30.2397          119       170     2012      03        27        087              0.296125      18.604950       0.167711       0.346706       0.165000       0.089700   -9999.000000       0.058000
57475     57475     hubei          112.5400       30.2397          119       170     2012      03        28        088              0.294583      20.220825       1.240844       0.344434   -9999.000000   -9999.000000   -9999.000000   -9999.000000
57475     57475     hubei          112.5400       30.2397          119       170     2012      03        29        089              0.361542      17.707916      17.362833       0.348219   -9999.000000       0.063900       0.145700       1.000000
57475     57475     hubei          112.5400       30.2397          119       170     2012      03        30        090              0.398458      17.681305       1.715447       0.370064   -9999.000000       0.268200       0.152700       0.420000
57475     57475     hubei          112.5400       30.2397          119       170     2012      03        31        091              0.346917      16.536072       1.190807       0.368116   -9999.000000   -9999.000000       0.134000   -9999.000000
57475     57475     hubei          112.5400       30.2397          119       170     2012      04        01        092              0.000000      18.064514       3.468433       0.355567       0.185000       0.070200       0.142200       0.271000
57475     57475     hubei          112.5400       30.2397          119       170     2012      04        02        093              0.000000      19.262177       0.484253       0.350170   -9999.000000       0.150900   -9999.000000   -9999.000000
57475     57475     hubei          112.5400       30.2397          119       170     2012      04        03        094              0.000000      20.350677       1.027872       0.344828   -9999.000000       0.134600   -9999.000000       0.013000
57475     57475     hubei          112.5400       30.2397          119       170     2012      04        04        095              0.000000      17.045532       9.948493       0.345612   -9999.000000       0.053700       0.099600   -9999.000000
57475     57475     hubei          112.5400       30.2397          119       170     2012      04        05        096              0.330000      13.670776       0.676478       0.368096   -9999.000000   -9999.000000       0.116200   -9999.000000
57475     57475     hubei          112.5400       30.2397          119       170     2012      04        06        097              0.327706      16.073975       0.311502       0.356415   -9999.000000       0.029100       0.108100       0.007000
57475     57475     hubei          112.5400       30.2397          119       170     2012      04        07        098              0.324875      19.893188       0.335052       0.350958       0.219000       0.128000   -9999.000000   -9999.000000
57475     57475     hubei          112.5400       30.2397          119       170     2012      04        08        099              0.323000      20.775055       0.426498       0.348647   -9999.000000       0.108000   -9999.000000       0.005000
57475     57475     hubei          112.5400       30.2397          119       170     2012      04        09        100              0.329583      19.773956       3.524755       0.348785   -9999.000000       0.153600       0.099200   -9999.000000
57475     57475     hubei          112.5400       30.2397          119       170     2012      04        10        101              0.366750      18.496674       4.334006       0.357207   -9999.000000   -9999.000000       0.091400   -9999.000000
57475     57475     hubei          112.5400       30.2397          119       170     2012      04        11        102              0.342292      18.226410       0.030859       0.360722   -9999.000000       0.080600       0.098400       0.087000
57475     57475     hubei          112.5400       30.2397          119       170     2012      04        12        103              0.403250      20.073456      22.023624       0.353470   -9999.000000   -9999.000000       0.121300   -9999.000000
57475     57475     hubei          112.5400       30.2397          119       170     2012      04        13        104              0.358875      14.865417       0.233571       0.382908   -9999.000000   -9999.000000   -9999.000000       0.264000
57475     57475     hubei          112.5400       30.2397          119       170     2012      04        14        105              0.346913      16.870270       0.120751       0.363963   -9999.000000       0.172600   -9999.000000   -9999.000000
57475     57475     hubei          112.5400       30.2397          119       170     2012      04        15        106              0.343333      16.049683       0.311511       0.359352   -9999.000000   -9999.000000       0.092400       0.763000
57475     57475     hubei          112.5400       30.2397          119       170     2012      04        16        107              0.340458      15.653717       1.641018       0.357916   -9999.000000       0.187600       0.102200       0.414000
57475     57475     hubei          112.5400       30.2397          119       170     2012      04        17        108              0.338417      18.037384       0.147671       0.354753   -9999.000000       0.384700       0.102100   -9999.000000
57475     57475     hubei          112.5400       30.2397          119       170     2012      04        18        109              0.336708      18.383453       0.353884       0.354085   -9999.000000   -9999.000000   -9999.000000       0.156000
57475     57475     hubei          112.5400       30.2397          119       170     2012      04        19        110              0.334542      21.375793       0.000000       0.349757   -9999.000000       0.333900   -9999.000000   -9999.000000
57475     57475     hubei          112.5400       30.2397          119       170     2012      04        20        111              0.333875      23.890350       0.565252       0.346843   -9999.000000   -9999.000000   -9999.000000       0.704000
57475     57475     hubei          112.5400       30.2397          119       170     2012      04        21        112              0.334292      18.970703       0.637704       0.350241   -9999.000000       0.123100       0.088800   -9999.000000
57475     57475     hubei          112.5400       30.2397          119       170     2012      04        22        113              0.331625      22.409027      18.023376       0.345233       0.214000       0.305500       0.111100   -9999.000000
57475     57475     hubei          112.5400       30.2397          119       170     2012      04        23        114              0.330542      22.966949       7.832276       0.368913       0.261000   -9999.000000       0.128700       0.313000
57475     57475     hubei          112.5400       30.2397          119       170     2012      04        24        115              0.408417      23.814270       7.799853       0.364663   -9999.000000       0.526300   -9999.000000   -9999.000000
57475     57475     hubei          112.5400       30.2397          119       170     2012      04        25        116              0.000000      21.214264       1.697193       0.375133   -9999.000000       0.249800   -9999.000000       0.642000
57475     57475     hubei          112.5400       30.2397          119       170     2012      04        26        117              0.352042      19.749359       1.178076       0.361980   -9999.000000       0.119100       0.134600   -9999.000000
57475     57475     hubei          112.5400       30.2397          119       170     2012      04        27        118              0.353542      22.106110       0.280859       0.354787       0.215000       0.329700   -9999.000000       0.713000
57475     57475     hubei          112.5400       30.2397          119       170     2012      04        28        119              0.408750      24.509949      11.852418       0.349951       0.256000   -9999.000000       0.150500       0.331000
57475     57475     hubei          112.5400       30.2397          119       170     2012      04        29        120              0.406333      23.728394       0.650391       0.369680   -9999.000000       0.422400       0.144900   -9999.000000
57475     57475     hubei          112.5400       30.2397          119       170     2012      04        30        121              0.427375      22.934631      17.992945       0.360593   -9999.000000       0.326000   -9999.000000       1.000000
57475     57475     hubei          112.5400       30.2397          119       170     2012      05        01        122              0.402875      21.023041       0.688769       0.383710   -9999.000000   -9999.000000   -9999.000000   -9999.000000
57475     57475     hubei          112.5400       30.2397          119       170     2012      05        02        123              0.404833      22.671967       2.947247       0.364536       0.214000       0.482500       0.116400       0.577000
57475     57475     hubei          112.5400       30.2397          119       170     2012      05        03        124              0.411167      24.239136       4.594879       0.362067       0.266000   -9999.000000       0.135900   -9999.000000
57475     57475     hubei          112.5400       30.2397          119       170     2012      05        04        125              0.398125      22.096191       0.468227       0.369609   -9999.000000   -9999.000000       0.120400   -9999.000000
57475     57475     hubei          112.5400       30.2397          119       170     2012      05        05        126              0.393958      25.197693       0.000000       0.360440   -9999.000000   -9999.000000       0.118300       0.707000
57475     57475     hubei          112.5400       30.2397          119       170     2012      05        06        127              0.390375      27.103241       0.000000       0.354964   -9999.000000   -9999.000000   -9999.000000   -9999.000000
57475     57475     hubei          112.5400       30.2397          119       170     2012      05        07        128              0.387792      28.268738       1.139635       0.352368   -9999.000000       0.225500   -9999.000000       0.541000
57475     57475     hubei          112.5400       30.2397          119       170     2012      05        08        129              0.388667      27.975067       5.805424       0.353080       0.225000   -9999.000000       0.086300   -9999.000000
57475     57475     hubei          112.5400       30.2397          119       170     2012      05        09        130              0.388375      27.220276       3.353008       0.360721   -9999.000000       0.300000       0.115000   -9999.000000
57475     57475     hubei          112.5400       30.2397          119       170     2012      05        10        131              0.386000      24.987885       0.219078       0.363165   -9999.000000       0.450200       0.107100       0.751000
57475     57475     hubei          112.5400       30.2397          119       170     2012      05        11        132              0.383958      27.909027       5.766635       0.351647       0.211500   -9999.000000   -9999.000000   -9999.000000
57475     57475     hubei          112.5400       30.2397          119       170     2012      05        12        133              0.412042      28.042755      12.437061       0.356178       0.269000       0.512800   -9999.000000       0.850000
57475     57475     hubei          112.5400       30.2397          119       170     2012      05        13        134              0.412708      21.125366      19.548317       0.375513       0.239000       0.318300       0.135100   -9999.000000
57475     57475     hubei          112.5400       30.2397          119       170     2012      05        14        135              0.427042      21.576172       4.785244       0.379631   -9999.000000       0.211500       0.137500       0.880000
57475     57475     hubei          112.5400       30.2397          119       170     2012      05        15        136              0.397250      20.542511       0.269971       0.377761   -9999.000000       0.303800       0.150100       0.817000
57475     57475     hubei          112.5400       30.2397          119       170     2012      05        16        137              0.391333      22.250671       0.290767       0.365459   -9999.000000   -9999.000000       0.143000   -9999.000000
57475     57475     hubei          112.5400       30.2397          119       170     2012      05        17        138              0.385458      24.951233       0.077325       0.359281       0.186000       0.605200   -9999.000000       0.195000
57475     57475     hubei          112.5400       30.2397          119       170     2012      05        18        139              0.397083      27.923523       8.415855       0.354909       0.248500       0.185000   -9999.000000   -9999.000000
57475     57475     hubei          112.5400       30.2397          119       170     2012      05        19        140              0.405667      24.938507       1.649432       0.365527       0.227000   -9999.000000       0.122400       0.573000
57475     57475     hubei          112.5400       30.2397          119       170     2012      05        20        141              0.392167      26.293182       0.421812       0.361382   -9999.000000       0.432500       0.148100   -9999.000000
57475     57475     hubei          112.5400       30.2397          119       170     2012      05        21        142              0.388917      26.530273       0.584793       0.352172       0.240000   -9999.000000       0.103900   -9999.000000
57475     57475     hubei          112.5400       30.2397          119       170     2012      05        22        143              0.389167      25.928253       4.453546       0.350886       0.253000       0.349000       0.122600       0.625000
57475     57475     hubei          112.5400       30.2397          119       170     2012      05        23        144              0.407542      22.887512      10.756824       0.359477   -9999.000000       0.274000   -9999.000000   -9999.000000
57475     57475     hubei          112.5400       30.2397          119       170     2012      05        24        145              0.402625      21.646271       3.036250       0.370541       0.336000   -9999.000000   -9999.000000       0.864000
57475     57475     hubei          112.5400       30.2397          119       170     2012      05        25        146              0.000000      20.848663       0.442594       0.368312   -9999.000000       0.485700       0.151000   -9999.000000
57475     57475     hubei          112.5400       30.2397          119       170     2012      05        26        147              0.392542      21.971680       2.870302       0.360204   -9999.000000   -9999.000000       0.123200       0.237000
57475     57475     hubei          112.5400       30.2397          119       170     2012      05        27        148              0.390125      25.532410       0.000000       0.353653   -9999.000000       0.277500       0.135800       0.135000
57475     57475     hubei          112.5400       30.2397          119       170     2012      05        28        149              0.390708      26.597565      16.044569       0.351227       0.305000       0.433500   -9999.000000   -9999.000000
57475     57475     hubei          112.5400       30.2397          119       170     2012      05        29        150              0.426375      27.809814      40.417404       0.364781   -9999.000000   -9999.000000   -9999.000000       1.000000
57475     57475     hubei          112.5400       30.2397          119       170     2012      05        30        151              0.401458      22.079529       0.578611       0.400925   -9999.000000       0.766700       0.181600   -9999.000000
57475     57475     hubei          112.5400       30.2397          119       170     2012      05        31        152              0.394250      26.254517       0.451137       0.370834   -9999.000000   -9999.000000       0.153700   -9999.000000
57475     57475     hubei          112.5400       30.2397          119       170     2012      06        01        153              0.392292      26.669952       1.296603       0.365887   -9999.000000       0.604300       0.152900   -9999.000000
57475     57475     hubei          112.5400       30.2397          119       170     2012      06        02        154              0.390917      23.374359       0.522072       0.368706   -9999.000000       0.468400       0.161600   -9999.000000
57475     57475     hubei          112.5400       30.2397          119       170     2012      06        03        155              0.389708      26.118134       1.749900       0.363615       0.328000   -9999.000000   -9999.000000       0.486000
57475     57475     hubei          112.5400       30.2397          119       170     2012      06        04        156              0.383083      24.910339       0.103598       0.365854       0.350000       0.501000   -9999.000000   -9999.000000
57475     57475     hubei          112.5400       30.2397          119       170     2012      06        05        157              0.381333      25.296814       2.349763       0.363024   -9999.000000       0.588100       0.147900       0.707000
57475     57475     hubei          112.5400       30.2397          119       170     2012      06        06        158              0.381000      26.741699       0.601885       0.362668       0.356000   -9999.000000       0.161900   -9999.000000
57475     57475     hubei          112.5400       30.2397          119       170     2012      06        07        159              0.379833      27.761658       0.000000       0.361612   -9999.000000       0.536300       0.163600   -9999.000000
57475     57475     hubei          112.5400       30.2397          119       170     2012      06        08        160              0.377750      27.844788       0.068198       0.357361       0.310500   -9999.000000       0.149400       0.432000
57475     57475     hubei          112.5400       30.2397          119       170     2012      06        09        161              0.376083      29.548706       1.304144       0.354257       0.286000       0.535700   -9999.000000   -9999.000000
57475     57475     hubei          112.5400       30.2397          119       170     2012      06        10        162              0.374708      30.997681       1.166783       0.351328   -9999.000000       0.408800   -9999.000000       0.405000
57475     57475     hubei          112.5400       30.2397          119       170     2012      06        11        163              0.000000      28.780151       0.129898       0.354010   -9999.000000   -9999.000000       0.147300   -9999.000000
57475     57475     hubei          112.5400       30.2397          119       170     2012      06        12        164              0.370708      28.407379       0.468957       0.349052   -9999.000000       0.566700       0.153600       0.429000
57475     57475     hubei          112.5400       30.2397          119       170     2012      06        13        165              0.366667      29.895905       0.065108       0.341912       0.323000   -9999.000000       0.166700       0.373000
57475     57475     hubei          112.5400       30.2397          119       170     2012      06        14        166              0.364750      30.776184       0.454430       0.337466       0.369000       0.428700   -9999.000000   -9999.000000
57475     57475     hubei          112.5400       30.2397          119       170     2012      06        15        167              0.360375      29.198578       1.313284       0.339169   -9999.000000       0.435400   -9999.000000       0.150000
57475     57475     hubei          112.5400       30.2397          119       170     2012      06        16        168              0.355750      29.602264       3.822602       0.332787   -9999.000000   -9999.000000       0.126300   -9999.000000
57475     57475     hubei          112.5400       30.2397          119       170     2012      06        17        169              0.351083      30.225250       0.000000       0.330493       0.282000       0.407600       0.130500       0.369000
57475     57475     hubei          112.5400       30.2397          119       170     2012      06        18        170              0.346208      30.422119       0.000000       0.327633       0.315500       0.617200       0.146100   -9999.000000
57475     57475     hubei          112.5400       30.2397          119       170     2012      06        19        171              0.339750      30.754791       0.000000       0.327081       0.314000       0.500200       0.149900   -9999.000000
57475     57475     hubei          112.5400       30.2397          119       170     2012      06        20        172              0.333708      31.790405       0.000000       0.323683   -9999.000000       0.572000   -9999.000000       0.101000
57475     57475     hubei          112.5400       30.2397          119       170     2012      06        21        173              0.328292      31.713104       1.148725       0.322805   -9999.000000   -9999.000000   -9999.000000   -9999.000000
57475     57475     hubei          112.5400       30.2397          119       170     2012      06        22        174              0.320750      31.547943       0.000000       0.321503       0.338000       0.511800       0.103800       0.181000
57475     57475     hubei          112.5400       30.2397          119       170     2012      06        23        175              0.310208      31.574158       0.000000       0.319059       0.315500       0.200500       0.117000   -9999.000000
57475     57475     hubei          112.5400       30.2397          119       170     2012      06        24        176              0.299625      31.493195       0.000000       0.317035       0.314500   -9999.000000       0.124600       0.683000
57475     57475     hubei          112.5400       30.2397          119       170     2012      06        25        177              0.306375      31.630341      31.004801       0.313912       0.307000       0.229100       0.080800       0.097000
57475     57475     hubei          112.5400       30.2397          119       170     2012      06        26        178              0.443167      30.357635      85.799820       0.351061   -9999.000000   -9999.000000   -9999.000000   -9999.000000
57475     57475     hubei          112.5400       30.2397          119       170     2012      06        27        179              0.446833      27.489319      55.234108       0.431557   -9999.000000       0.668100   -9999.000000       1.000000
57475     57475     hubei          112.5400       30.2397          119       170     2012      06        28        180              0.444435      26.159546      10.543844       0.443054       0.448000       0.486200       0.117500   -9999.000000
57475     57475     hubei          112.5400       30.2397          119       170     2012      06        29        181              0.412167      26.768524       0.212962       0.486398       0.405000   -9999.000000       0.103600       1.000000
57475     57475     hubei          112.5400       30.2397          119       170     2012      06        30        182              0.401167      29.939362       0.646298       0.430113       0.391000       0.529800       0.114700   -9999.000000
57475     57475     hubei          112.5400       30.2397          119       170     2012      07        01        183              0.401364      27.965637       0.206130       0.388259   -9999.000000   -9999.000000   -9999.000000   -9999.000000
57475     57475     hubei          112.5400       30.2397          119       170     2012      07        02        184              0.403792      29.018402       0.000000       0.378926       0.329000       0.272500   -9999.000000       0.400000
57475     57475     hubei          112.5400       30.2397          119       170     2012      07        03        185              0.400083      31.583710       0.227169       0.369250       0.331500       0.385700       0.141000   -9999.000000
57475     57475     hubei          112.5400       30.2397          119       170     2012      07        04        186              0.393833      32.166748       0.078351       0.362779       0.360500   -9999.000000       0.136300       0.647000
57475     57475     hubei          112.5400       30.2397          119       170     2012      07        05        187              0.392125      31.784790       0.089998       0.358817       0.354000       0.207100       0.146700   -9999.000000
57475     57475     hubei          112.5400       30.2397          119       170     2012      07        06        188              0.391292      30.437012       0.460517       0.357556   -9999.000000       0.231400       0.146700   -9999.000000
57475     57475     hubei          112.5400       30.2397          119       170     2012      07        07        189              0.384000      32.488770       0.394312       0.354888   -9999.000000       0.304400   -9999.000000       0.431000
57475     57475     hubei          112.5400       30.2397          119       170     2012      07        08        190              0.377625      32.736908       2.605668       0.349892       0.316000       0.348400   -9999.000000   -9999.000000
57475     57475     hubei          112.5400       30.2397          119       170     2012      07        09        191              0.370625      32.363434       2.137624       0.345879       0.319500   -9999.000000       0.169200       0.165000
57475     57475     hubei          112.5400       30.2397          119       170     2012      07        10        192              0.367458      32.087433       3.406319       0.340304       0.336500       0.404700       0.191800   -9999.000000
57475     57475     hubei          112.5400       30.2397          119       170     2012      07        11        193              0.365958      32.433990       0.713670       0.338030       0.427000       0.321100       0.199700       0.327000
57475     57475     hubei          112.5400       30.2397          119       170     2012      07        12        194              0.420458      33.386810       5.869864       0.337896   -9999.000000       0.261000   -9999.000000       0.036000
57475     57475     hubei          112.5400       30.2397          119       170     2012      07        13        195              0.446652      31.131165      51.611675       0.346558       0.500000       0.308600   -9999.000000   -9999.000000
57475     57475     hubei          112.5400       30.2397          119       170     2012      07        14        196              0.438750      27.803497       0.244072       0.398873       0.466500   -9999.000000       0.207800       0.655000
57475     57475     hubei          112.5400       30.2397          119       170     2012      07        15        197              0.427208      30.360504       1.645913       0.369161       0.476000       0.576800       0.190200   -9999.000000
57475     57475     hubei          112.5400       30.2397          119       170     2012      07        16        198              0.421875      29.975067       1.718585       0.359603       0.477000       0.474200       0.124100       0.531000
57475     57475     hubei          112.5400       30.2397          119       170     2012      07        17        199              0.417625      30.331665       0.277556       0.356067   -9999.000000   -9999.000000       0.127000   -9999.000000
57475     57475     hubei          112.5400       30.2397          119       170     2012      07        18        200              0.414458      30.762848       9.749796       0.352084       0.432000       0.518100   -9999.000000   -9999.000000
57475     57475     hubei          112.5400       30.2397          119       170     2012      07        19        201              0.441583      30.563965       4.238997       0.356875       0.477000   -9999.000000   -9999.000000       0.512000
57475     57475     hubei          112.5400       30.2397          119       170     2012      07        20        202              0.431167      30.404144       0.778404       0.368401       0.456000       0.453800       0.109200   -9999.000000
57475     57475     hubei          112.5400       30.2397          119       170     2012      07        21        203              0.419826      32.349609       1.118571       0.355438       0.463000       0.329500       0.117300       0.545000
57475     57475     hubei          112.5400       30.2397          119       170     2012      07        22        204              0.414417      33.405640       1.267354       0.347630       0.488000   -9999.000000       0.105600   -9999.000000
57475     57475     hubei          112.5400       30.2397          119       170     2012      07        23        205              0.422792      32.393250      19.569284       0.344236   -9999.000000       0.230800       0.139700       1.000000
57475     57475     hubei          112.5400       30.2397          119       170     2012      07        24        206              0.422625      31.994781       0.000000       0.368775       0.464000       0.279500   -9999.000000       0.400000
57475     57475     hubei          112.5400       30.2397          119       170     2012      07        25        207              0.411833      32.923065       0.000000       0.358398       0.451000   -9999.000000   -9999.000000   -9999.000000
57475     57475     hubei          112.5400       30.2397          119       170     2012      07        26        208              0.404500      33.551117       0.623975       0.348044       0.447000       0.344400       0.124200       0.306000
57475     57475     hubei          112.5400       30.2397          119       170     2012      07        27        209              0.399125      33.470673       0.434584       0.342174       0.433000   -9999.000000       0.150600   -9999.000000
57475     57475     hubei          112.5400       30.2397          119       170     2012      07        28        210              0.395167      33.731018       1.521481       0.338008   -9999.000000       0.207300       0.151200       0.678000
57475     57475     hubei          112.5400       30.2397          119       170     2012      07        29        211              0.390333      33.770477       0.000000       0.334720       0.416000       0.276500   -9999.000000   -9999.000000
57475     57475     hubei          112.5400       30.2397          119       170     2012      07        30        212              0.384250      33.928497       0.000000       0.331187       0.406500       0.262400   -9999.000000   -9999.000000
57475     57475     hubei          112.5400       30.2397          119       170     2012      07        31        213              0.379667      34.204315       0.000000       0.328171       0.421500       0.066200       0.113000       0.306000
57475     57475     hubei          112.5400       30.2397          119       170     2012      08        01        214              0.374000      34.410675       1.035589       0.325457       0.475000   -9999.000000       0.108700   -9999.000000
57475     57475     hubei          112.5400       30.2397          119       170     2012      08        02        215              0.365917      32.663788       0.000000       0.328123   -9999.000000       0.205000       0.117700       0.639000
57475     57475     hubei          112.5400       30.2397          119       170     2012      08        03        216              0.358500      31.904449       0.000000       0.324518   -9999.000000       0.181200       0.112400   -9999.000000
57475     57475     hubei          112.5400       30.2397          119       170     2012      08        04        217              0.358458      31.618439      21.205961       0.321781       0.473000   -9999.000000   -9999.000000   -9999.000000
57475     57475     hubei          112.5400       30.2397          119       170     2012      08        05        218              0.367958      29.512512       0.572349       0.351330       0.490000       0.282700   -9999.000000       0.444000
57475     57475     hubei          112.5400       30.2397          119       170     2012      08        06        219              0.357583      31.400177       0.154309       0.357089       0.499000   -9999.000000       0.158800   -9999.000000
57475     57475     hubei          112.5400       30.2397          119       170     2012      08        07        220              0.372333      31.829865       0.241734       0.344199       0.491000   -9999.000000       0.169400       0.334000
57475     57475     hubei          112.5400       30.2397          119       170     2012      08        08        221              0.387750      31.926758       0.000000       0.337147   -9999.000000       0.291900       0.165700   -9999.000000
57475     57475     hubei          112.5400       30.2397          119       170     2012      08        09        222              0.388000      31.529510       0.000000       0.331241       0.446000   -9999.000000       0.175200       0.450000
57475     57475     hubei          112.5400       30.2397          119       170     2012      08        10        223              0.388625      31.467773       0.000000       0.326584       0.444000       0.216300   -9999.000000       0.253000
57475     57475     hubei          112.5400       30.2397          119       170     2012      08        11        224              0.389000      31.229065       0.625454       0.322189       0.446000       0.132600   -9999.000000   -9999.000000
57475     57475     hubei          112.5400       30.2397          119       170     2012      08        12        225              0.389000      31.545380       0.450179       0.323013       0.418000       0.198500       0.159200       0.215000
57475     57475     hubei          112.5400       30.2397          119       170     2012      08        13        226              0.389000      33.296783       3.674019       0.319675   -9999.000000       0.149900       0.127200   -9999.000000
57475     57475     hubei          112.5400       30.2397          119       170     2012      08        14        227              0.389250      31.273743       0.000000       0.331693       0.412000   -9999.000000       0.137800       0.194000
57475     57475     hubei          112.5400       30.2397          119       170     2012      08        15        228              0.390000      30.561157       0.000000       0.325929       0.442500       0.289800   -9999.000000   -9999.000000
57475     57475     hubei          112.5400       30.2397          119       170     2012      08        16        229              0.390000      31.788361       0.000000       0.322287       0.409500       0.243300   -9999.000000   -9999.000000
57475     57475     hubei          112.5400       30.2397          119       170     2012      08        17        230              0.390000      31.922943       0.000000       0.318330       0.439500       0.255300       0.118900       0.139000
57475     57475     hubei          112.5400       30.2397          119       170     2012      08        18        231              0.390875      32.747101       0.000000       0.315060       0.430000       0.177600       0.130000   -9999.000000
57475     57475     hubei          112.5400       30.2397          119       170     2012      08        19        232              0.391000      33.645874      13.262629       0.311587   -9999.000000   -9999.000000       0.127000       0.614000
57475     57475     hubei          112.5400       30.2397          119       170     2012      08        20        233              0.390208      33.289154      35.679008       0.333399   -9999.000000       0.240700       0.190200   -9999.000000
57475     57475     hubei          112.5400       30.2397          119       170     2012      08        21        234              0.384292      31.424561       1.972338       0.367025       0.479000       0.320600   -9999.000000       0.693000
57475     57475     hubei          112.5400       30.2397          119       170     2012      08        22        235              0.385125      26.047699       0.000000       0.375244       0.427000   -9999.000000   -9999.000000   -9999.000000
57475     57475     hubei          112.5400       30.2397          119       170     2012      08        23        236              0.386000      25.329529       0.000000       0.354674       0.436000       0.258500       0.168700   -9999.000000
57475     57475     hubei          112.5400       30.2397          119       170     2012      08        24        237              0.386583      25.525909       0.000000       0.346477   -9999.000000   -9999.000000       0.191000       0.116000
57475     57475     hubei          112.5400       30.2397          119       170     2012      08        25        238              0.000000      27.427979       0.000000       0.338209       0.396000       0.309000       0.185900   -9999.000000
57475     57475     hubei          112.5400       30.2397          119       170     2012      08        26        239              0.387792      29.148346       0.317100       0.333331       0.424500       0.278700       0.184900       0.727000
57475     57475     hubei          112.5400       30.2397          119       170     2012      08        27        240              0.388000      27.462311       0.000000       0.331866       0.406500   -9999.000000   -9999.000000   -9999.000000
57475     57475     hubei          112.5400       30.2397          119       170     2012      08        28        241              0.388000      28.617950       0.000000       0.328295       0.411000       0.296800   -9999.000000   -9999.000000
57475     57475     hubei          112.5400       30.2397          119       170     2012      08        29        242              0.388750      29.786194       0.462669       0.324465   -9999.000000   -9999.000000       0.106900       0.402000
57475     57475     hubei          112.5400       30.2397          119       170     2012      08        30        243              0.389000      31.282318       0.000000       0.321131   -9999.000000       0.294800       0.115000   -9999.000000
57475     57475     hubei          112.5400       30.2397          119       170     2012      08        31        244              0.389000      31.394440       0.219224       0.318475       0.443000       0.205500       0.110800       0.571000
57475     57475     hubei          112.5400       30.2397          119       170     2012      09        01        245              0.389833      31.492371       1.034405       0.317249       0.370000   -9999.000000   -9999.000000   -9999.000000
57475     57475     hubei          112.5400       30.2397          119       170     2012      09        02        246              0.390000      32.727081       6.885043       0.316222       0.409500       0.345800   -9999.000000   -9999.000000
57475     57475     hubei          112.5400       30.2397          119       170     2012      09        03        247              0.390000      26.183075       0.000000       0.337570       0.357000       0.228100       0.087800       0.684000
57475     57475     hubei          112.5400       30.2397          119       170     2012      09        04        248              0.390375      27.395538       0.000000       0.326198   -9999.000000       0.260200       0.090300   -9999.000000
57475     57475     hubei          112.5400       30.2397          119       170     2012      09        05        249              0.391000      28.042847       0.000000       0.320952       0.345000       0.176200       0.087000       0.378000
57475     57475     hubei          112.5400       30.2397          119       170     2012      09        06        250              0.391000      28.723572       0.000000       0.314569       0.385500   -9999.000000       0.098700   -9999.000000
57475     57475     hubei          112.5400       30.2397          119       170     2012      09        07        251              0.391000      28.845764       2.072519       0.311945       0.376500   -9999.000000   -9999.000000       0.292000
57475     57475     hubei          112.5400       30.2397          119       170     2012      09        08        252              0.390083      30.601410      13.804821       0.314653       0.433000       0.284900   -9999.000000       0.393000
57475     57475     hubei          112.5400       30.2397          119       170     2012      09        09        253              0.385917      27.133942       0.131009       0.336202   -9999.000000   -9999.000000       0.089000   -9999.000000
57475     57475     hubei          112.5400       30.2397          119       170     2012      09        10        254              0.386708      26.072083       0.000000       0.342406       0.372000       0.214500       0.130300       0.451000
57475     57475     hubei          112.5400       30.2397          119       170     2012      09        11        255              0.387000      27.480560       1.445946       0.332404       0.311500   -9999.000000       0.126100   -9999.000000
57475     57475     hubei          112.5400       30.2397          119       170     2012      09        12        256              0.384500      26.911133       6.945037       0.330804       0.372000       0.257100   -9999.000000       0.840000
57475     57475     hubei          112.5400       30.2397          119       170     2012      09        13        257              0.384792      23.108429       4.481435       0.348837   -9999.000000       0.336500   -9999.000000   -9999.000000
57475     57475     hubei          112.5400       30.2397          119       170     2012      09        14        258              0.385542      22.501709       1.473993       0.336676       0.288000   -9999.000000       0.117200   -9999.000000
57475     57475     hubei          112.5400       30.2397          119       170     2012      09        15        259              0.386000      24.330078       0.540838       0.329724   -9999.000000       0.171300       0.108700       0.373000
57475     57475     hubei          112.5400       30.2397          119       170     2012      09        16        260              0.387000      24.633881       0.087768       0.323659       0.319000   -9999.000000       0.117500   -9999.000000
57475     57475     hubei          112.5400       30.2397          119       170     2012      09        17        261              0.387000      23.951416       0.000000       0.322325       0.279000       0.135800       0.087400       0.612000
57475     57475     hubei          112.5400       30.2397          119       170     2012      09        18        262              0.387083      24.385651       0.302031       0.319358       0.264000       0.260900   -9999.000000   -9999.000000
57475     57475     hubei          112.5400       30.2397          119       170     2012      09        19        263              0.388000      25.570831       0.000000       0.316437       0.292000   -9999.000000   -9999.000000       0.767000
57475     57475     hubei          112.5400       30.2397          119       170     2012      09        20        264              0.388000      26.691956       4.443684       0.311948   -9999.000000       0.234900       0.088700       0.304000
57475     57475     hubei          112.5400       30.2397          119       170     2012      09        21        265              0.388000      27.427704       1.662256       0.316576   -9999.000000       0.324700       0.095500   -9999.000000
57475     57475     hubei          112.5400       30.2397          119       170     2012      09        22        266              0.388000      23.626984       1.621475       0.330927       0.286500       0.172900       0.090100       0.693000
57475     57475     hubei          112.5400       30.2397          119       170     2012      09        23        267              0.388000      26.597534       0.198116       0.323849       0.315000       0.149400       0.094900   -9999.000000
57475     57475     hubei          112.5400       30.2397          119       170     2012      09        24        268              0.388000      25.091461       0.000000       0.326077       0.304000   -9999.000000   -9999.000000       0.746000
57475     57475     hubei          112.5400       30.2397          119       170     2012      09        25        269              0.388000      26.498047       0.000000       0.320653   -9999.000000       0.501200   -9999.000000   -9999.000000
57475     57475     hubei          112.5400       30.2397          119       170     2012      09        26        270              0.388000      26.683777       0.259767       0.316717   -9999.000000       0.174000       0.062200   -9999.000000
57475     57475     hubei          112.5400       30.2397          119       170     2012      09        27        271              0.388000      25.542908       0.000000       0.315613       0.236000   -9999.000000       0.071900       0.449000
57475     57475     hubei          112.5400       30.2397          119       170     2012      09        28        272              0.389000      26.560883       0.000000       0.310025       0.274000   -9999.000000       0.073800   -9999.000000
57475     57475     hubei          112.5400       30.2397          119       170     2012      09        29        273              0.389000      23.679016       0.000000       0.303100       0.263000   -9999.000000   -9999.000000       0.558000
57475     57475     hubei          112.5400       30.2397          119       170     2012      09        30        274              0.389375      23.492310       0.000000       0.301213       0.294000       0.186100   -9999.000000   -9999.000000
57475     57475     hubei          112.5400       30.2397          119       170     2012      10        01        275              0.390000      21.998566       0.505600       0.303569   -9999.000000   -9999.000000       0.073000   -9999.000000
57475     57475     hubei          112.5400       30.2397          119       170     2012      10        02        276              0.390000      23.641113       0.031831       0.300653       0.213000   -9999.000000       0.072300       0.596000
57475     57475     hubei          112.5400       30.2397          119       170     2012      10        03        277              0.390000      24.604614       0.225401       0.298410   -9999.000000       0.282600       0.065700   -9999.000000
57475     57475     hubei          112.5400       30.2397          119       170     2012      10        04        278              0.390000      22.949371       2.673780       0.301220       0.285000   -9999.000000       0.075100       0.469000
57475     57475     hubei          112.5400       30.2397          119       170     2012      10        05        279              0.390000      23.012299       7.307629       0.307896       0.278000       0.157500   -9999.000000   -9999.000000
57475     57475     hubei          112.5400       30.2397          119       170     2012      10        06        280              0.390000      20.062286       1.232555       0.336688   -9999.000000       0.378600   -9999.000000       0.764000
57475     57475     hubei          112.5400       30.2397          119       170     2012      10        07        281              0.390000      21.781982       1.253086       0.327092   -9999.000000   -9999.000000       0.072100       0.655000
57475     57475     hubei          112.5400       30.2397          119       170     2012      10        08        282              0.389875      21.110046       0.102169       0.329615       0.299000       0.344400       0.086600   -9999.000000
57475     57475     hubei          112.5400       30.2397          119       170     2012      10        09        283              0.390000      20.678497       0.000000       0.325764       0.229000       0.119900       0.080100       0.534000
57475     57475     hubei          112.5400       30.2397          119       170     2012      10        10        284              0.390000      23.175507       0.249860       0.320032       0.240000       0.158900       0.080700   -9999.000000
57475     57475     hubei          112.5400       30.2397          119       170     2012      10        11        285              0.390000      22.961304       0.000000       0.314354       0.203000       0.147600   -9999.000000       0.282000
57475     57475     hubei          112.5400       30.2397          119       170     2012      10        12        286              0.390000      22.606812       0.578743       0.314655   -9999.000000   -9999.000000   -9999.000000   -9999.000000
57475     57475     hubei          112.5400       30.2397          119       170     2012      10        13        287              0.390000      21.136108       0.614368       0.316476   -9999.000000       0.624100       0.067200   -9999.000000
57475     57475     hubei          112.5400       30.2397          119       170     2012      10        14        288              0.389875      19.687897       5.254004       0.321324       0.221000       0.291700       0.078700       0.316000
57475     57475     hubei          112.5400       30.2397          119       170     2012      10        15        289              0.388208      21.273956      10.790671       0.327276       0.236000       0.416100       0.091700   -9999.000000
57475     57475     hubei          112.5400       30.2397          119       170     2012      10        16        290              0.383500      19.881287      15.677449       0.352477   -9999.000000       0.265700   -9999.000000       0.976000
57475     57475     hubei          112.5400       30.2397          119       170     2012      10        17        291              0.384083      18.048859       0.204712       0.371906   -9999.000000   -9999.000000   -9999.000000   -9999.000000
57475     57475     hubei          112.5400       30.2397          119       170     2012      10        18        292              0.385000      19.024780       0.183560       0.347601   -9999.000000       0.264900       0.080800       0.830000
57475     57475     hubei          112.5400       30.2397          119       170     2012      10        19        293              0.385000      20.337341       0.000000       0.340211   -9999.000000       0.318800       0.077100       0.715000
57475     57475     hubei          112.5400       30.2397          119       170     2012      10        20        294              0.385375      22.000458       0.368510       0.336050       0.176000   -9999.000000       0.079500   -9999.000000
57475     57475     hubei          112.5400       30.2397          119       170     2012      10        21        295              0.385708      23.484436       3.333880       0.333724       0.236500       0.350400       0.087700       0.613000
57475     57475     hubei          112.5400       30.2397          119       170     2012      10        22        296              0.385458      22.906921       0.924606       0.338130   -9999.000000   -9999.000000   -9999.000000   -9999.000000
57475     57475     hubei          112.5400       30.2397          119       170     2012      10        23        297              0.386000      17.905060       1.395274       0.336597   -9999.000000       0.424000   -9999.000000       0.730000
57475     57475     hubei          112.5400       30.2397          119       170     2012      10        24        298              0.385083      18.908112       0.423244       0.333288   -9999.000000       0.361500       0.059400   -9999.000000
57475     57475     hubei          112.5400       30.2397          119       170     2012      10        25        299              0.000000      16.365997      12.204712       0.336187   -9999.000000   -9999.000000       0.057300   -9999.000000
57475     57475     hubei          112.5400       30.2397          119       170     2012      10        26        300              0.383083      16.419434      35.236584       0.350767   -9999.000000       0.631600       0.090400       1.000000
57475     57475     hubei          112.5400       30.2397          119       170     2012      10        27        301              0.383083      16.178314       1.210816       0.392655   -9999.000000       0.205700       0.082100   -9999.000000
57475     57475     hubei          112.5400       30.2397          119       170     2012      10        28        302              0.000000      19.117188      14.000076       0.364013   -9999.000000       0.452300   -9999.000000       0.878000
57475     57475     hubei          112.5400       30.2397          119       170     2012      10        29        303              0.382208      21.295746      24.768936       0.363696   -9999.000000       0.338500   -9999.000000   -9999.000000
57475     57475     hubei          112.5400       30.2397          119       170     2012      10        30        304              0.383000      17.260437       0.468094       0.392933   -9999.000000   -9999.000000       0.079200   -9999.000000
57475     57475     hubei          112.5400       30.2397          119       170     2012      10        31        305              0.383000      16.926971       0.000000       0.366089   -9999.000000       0.291000       0.088200       0.792000
57475     57475     hubei          112.5400       30.2397          119       170     2012      11        01        306              0.383542      17.972321       0.000000       0.356049   -9999.000000       0.220200       0.086600   -9999.000000
57475     57475     hubei          112.5400       30.2397          119       170     2012      11        02        307              0.384000      17.077667       0.073458       0.350976   -9999.000000   -9999.000000   -9999.000000       0.619000
57475     57475     hubei          112.5400       30.2397          119       170     2012      11        03        308              0.383125      18.502716       5.533984       0.346358   -9999.000000       0.324400   -9999.000000   -9999.000000
57475     57475     hubei          112.5400       30.2397          119       170     2012      11        04        309              0.383000      14.174896       0.000000       0.357861   -9999.000000   -9999.000000       0.072900       0.845000
57475     57475     hubei          112.5400       30.2397          119       170     2012      11        05        310              0.383542      14.708496       0.361403       0.347276   -9999.000000       0.342700       0.075500       0.593000
57475     57475     hubei          112.5400       30.2397          119       170     2012      11        06        311              0.384000      14.423309       0.171703       0.344288   -9999.000000       0.470300       0.075200   -9999.000000
57475     57475     hubei          112.5400       30.2397          119       170     2012      11        07        312              0.384000      14.983582       0.190080       0.341420   -9999.000000   -9999.000000       0.088000       0.717000
57475     57475     hubei          112.5400       30.2397          119       170     2012      11        08        313              0.384000      13.981964       0.623211       0.342073   -9999.000000       0.345100   -9999.000000   -9999.000000
57475     57475     hubei          112.5400       30.2397          119       170     2012      11        09        314              0.384000      14.453247       2.406769       0.343120   -9999.000000   -9999.000000   -9999.000000       0.941000
57475     57475     hubei          112.5400       30.2397          119       170     2012      11        10        315              0.384000      12.873779       0.000000       0.349453   -9999.000000       0.378200       0.061800   -9999.000000
57475     57475     hubei          112.5400       30.2397          119       170     2012      11        11        316              0.384000      13.315918       0.000000       0.344631   -9999.000000       0.436500       0.082300   -9999.000000
57475     57475     hubei          112.5400       30.2397          119       170     2012      11        12        317              0.384000      13.264648       0.087089       0.341109   -9999.000000   -9999.000000       0.083300       0.578000
57475     57475     hubei          112.5400       30.2397          119       170     2012      11        13        318              0.000000      13.670990       0.492485       0.339991   -9999.000000       0.198500   -9999.000000   -9999.000000
57475     57475     hubei          112.5400       30.2397          119       170     2012      11        14        319              0.384000      16.158539       0.118549       0.340179   -9999.000000       0.087300   -9999.000000       0.531000
57475     57475     hubei          112.5400       30.2397          119       170     2012      11        15        320              0.383875      14.825226       6.965090       0.339747   -9999.000000       0.309900       0.091300   -9999.000000
57475     57475     hubei          112.5400       30.2397          119       170     2012      11        16        321              0.383750      10.157562       2.249101       0.356117   -9999.000000       0.193200       0.082400       1.000000
57475     57475     hubei          112.5400       30.2397          119       170     2012      11        17        322              0.000000      10.305054       0.000000       0.353617   -9999.000000   -9999.000000       0.087300       0.865000
57475     57475     hubei          112.5400       30.2397          119       170     2012      11        18        323              0.384000      10.754791       0.000000       0.348183   -9999.000000       0.151900       0.085600   -9999.000000
57475     57475     hubei          112.5400       30.2397          119       170     2012      11        19        324              0.384000      12.825775       0.643739       0.345069   -9999.000000       0.222000   -9999.000000       0.759000
57475     57475     hubei          112.5400       30.2397          119       170     2012      11        20        325              0.384000      13.173920       2.648479       0.344311   -9999.000000       0.338500   -9999.000000   -9999.000000
57475     57475     hubei          112.5400       30.2397          119       170     2012      11        21        326              0.384000      11.757568       0.489172       0.350357   -9999.000000       0.151800       0.077700       0.859000
57475     57475     hubei          112.5400       30.2397          119       170     2012      11        22        327              0.383250      12.074493       2.214411       0.347649   -9999.000000   -9999.000000       0.090300   -9999.000000
57475     57475     hubei          112.5400       30.2397          119       170     2012      11        23        328              0.383583      10.918976       0.000000       0.351751   -9999.000000       0.175100       0.079100   -9999.000000
57475     57475     hubei          112.5400       30.2397          119       170     2012      11        24        329              0.384000       9.137421       1.800637       0.346313   -9999.000000       0.296500       0.094600       0.936000
57475     57475     hubei          112.5400       30.2397          119       170     2012      11        25        330              0.384000       9.220367       0.000000       0.348358   -9999.000000   -9999.000000   -9999.000000   -9999.000000
57475     57475     hubei          112.5400       30.2397          119       170     2012      11        26        331              0.384000       8.605194       0.000000       0.347586   -9999.000000       0.247300   -9999.000000       0.724000
57475     57475     hubei          112.5400       30.2397          119       170     2012      11        27        332              0.384000      10.486786       0.000000       0.343807   -9999.000000   -9999.000000       0.069600   -9999.000000
57475     57475     hubei          112.5400       30.2397          119       170     2012      11        28        333              0.384000      10.305145       0.000000       0.342822   -9999.000000       0.383400       0.079800   -9999.000000
57475     57475     hubei          112.5400       30.2397          119       170     2012      11        29        334              0.384000      10.720642       0.423646       0.342037   -9999.000000       0.436000       0.091600       0.919000
57475     57475     hubei          112.5400       30.2397          119       170     2012      11        30        335              0.384000       9.338287       0.806803       0.342579   -9999.000000   -9999.000000   -9999.000000   -9999.000000
57475     57475     hubei          112.5400       30.2397          119       170     2012      12        01        336              0.384000       9.472015       2.403362       0.343961   -9999.000000       0.281200   -9999.000000       0.833000
57475     57475     hubei          112.5400       30.2397          119       170     2012      12        02        337              0.384000       5.691528       0.000000       0.349930   -9999.000000       0.151200       0.085900   -9999.000000
57475     57475     hubei          112.5400       30.2397          119       170     2012      12        03        338              0.384000       7.131195       0.000000       0.346038   -9999.000000       0.173800       0.087300       0.736000
57475     57475     hubei          112.5400       30.2397          119       170     2012      12        04        339              0.384000       7.932343       0.000000       0.344551   -9999.000000       0.167400       0.090400       0.521000
57475     57475     hubei          112.5400       30.2397          119       170     2012      12        05        340              0.384000       7.579010       0.000000       0.344036   -9999.000000   -9999.000000       0.093500   -9999.000000
57475     57475     hubei          112.5400       30.2397          119       170     2012      12        06        341              0.384000       9.334076       0.000000       0.342426   -9999.000000       0.314100   -9999.000000       0.635000
57475     57475     hubei          112.5400       30.2397          119       170     2012      12        07        342              0.384000       9.428131       0.000000       0.342130   -9999.000000       0.264600   -9999.000000   -9999.000000
57475     57475     hubei          112.5400       30.2397          119       170     2012      12        08        343              0.384000      10.650665       0.000000       0.341149   -9999.000000   -9999.000000       0.067000       0.588000
57475     57475     hubei          112.5400       30.2397          119       170     2012      12        09        344              0.384000       9.828430       0.000000       0.339838   -9999.000000       0.124500       0.083700   -9999.000000
57475     57475     hubei          112.5400       30.2397          119       170     2012      12        10        345              0.384000       8.205048       2.927471       0.338995   -9999.000000   -9999.000000       0.080700   -9999.000000
57475     57475     hubei          112.5400       30.2397          119       170     2012      12        11        346              0.384000       6.978729       0.000000       0.346221   -9999.000000       0.329600       0.079000       0.525000
57475     57475     hubei          112.5400       30.2397          119       170     2012      12        12        347              0.384000       7.201965       9.196084       0.343792   -9999.000000       0.195000   -9999.000000   -9999.000000
57475     57475     hubei          112.5400       30.2397          119       170     2012      12        13        348              0.383167       7.229126       5.417245       0.350977   -9999.000000   -9999.000000   -9999.000000       0.862000
57475     57475     hubei          112.5400       30.2397          119       170     2012      12        14        349              0.383083       6.323578       2.993143       0.367274   -9999.000000       0.304900       0.072500   -9999.000000
57475     57475     hubei          112.5400       30.2397          119       170     2012      12        15        350              0.000000       5.300049       0.000000       0.360654   -9999.000000   -9999.000000       0.084600       0.808000
57475     57475     hubei          112.5400       30.2397          119       170     2012      12        16        351              0.384000       6.592834       0.602132       0.353762   -9999.000000       0.253700       0.087900       0.783000
57475     57475     hubei          112.5400       30.2397          119       170     2012      12        17        352              0.383417       6.622864      11.131740       0.350444   -9999.000000       0.332000   -9999.000000   -9999.000000
57475     57475     hubei          112.5400       30.2397          119       170     2012      12        18        353              0.383000       5.543243       0.000000       0.367526   -9999.000000   -9999.000000   -9999.000000       0.776000
57475     57475     hubei          112.5400       30.2397          119       170     2012      12        19        354              0.383000       5.365417       1.954373       0.357557   -9999.000000       0.356700       0.077700   -9999.000000
57475     57475     hubei          112.5400       30.2397          119       170     2012      12        20        355              0.000000       5.616486       1.142556       0.356198   -9999.000000       0.059300       0.070300       0.885000
57475     57475     hubei          112.5400       30.2397          119       170     2012      12        21        356              0.383000       2.997467       0.502357       0.354796   -9999.000000       0.178800       0.074700   -9999.000000
57475     57475     hubei          112.5400       30.2397          119       170     2012      12        22        357              0.383042       3.948303       0.000000       0.351481   -9999.000000       0.254400       0.079900   -9999.000000
57475     57475     hubei          112.5400       30.2397          119       170     2012      12        23        358              0.383958       4.705719       0.160501       0.348644   -9999.000000   -9999.000000   -9999.000000       0.387000
57475     57475     hubei          112.5400       30.2397          119       170     2012      12        24        359              0.384000       3.921722       0.000000       0.344790   -9999.000000       0.201300   -9999.000000   -9999.000000
57475     57475     hubei          112.5400       30.2397          119       170     2012      12        25        360              0.384000       5.749939       0.000000       0.345433   -9999.000000   -9999.000000       0.059600       0.510000
57475     57475     hubei          112.5400       30.2397          119       170     2012      12        26        361              0.000000       2.411957       0.169092       0.339035   -9999.000000       0.218800       0.087200   -9999.000000
57475     57475     hubei          112.5400       30.2397          119       170     2012      12        27        362              0.383455       1.188782       0.738102       0.319912   -9999.000000       0.389100       0.087900   -9999.000000
57475     57475     hubei          112.5400       30.2397          119       170     2012      12        28        363              0.384000       1.963776       8.403281       0.332965   -9999.000000   -9999.000000   -9999.000000       0.769000
57475     57475     hubei          112.5400       30.2397          119       170     2012      12        29        364              0.000000       2.680603       2.150740       0.346810   -9999.000000       0.515800   -9999.000000   -9999.000000
57475     57475     hubei          112.5400       30.2397          119       170     2012      12        30        365              0.000000       1.979828       0.333555       0.352173   -9999.000000       0.464300       0.070100       0.014000
57475     57475     hubei          112.5400       30.2397          119       170     2012      12        31        366              0.383000       3.005005       0.695548       0.340056   -9999.000000   -9999.000000       0.056600   -9999.000000
