# Supplementary material for: Research on Fusing Multisatellite Soil Moisture Data Based on Bayesian Model Averaging
Source: Hindawi journal article supplement (doi:10.1155/2018/9310838), 2018-06-25
Supplement: f1 [file 9310838.f1.zip › 2012_sm00-10cm_daily_ZDB_ZHY_57481_366days_allin.txt]

57481     57481     hubei          113.5697       30.9697          116       174     2012      01        01        001              0.000000   -9999.000000       0.000000   -9999.000000       0.125000   -9999.000000       0.117100   -9999.000000
57481     57481     hubei          113.5697       30.9697          116       174     2012      01        02        002              0.132958       3.374603       0.000000       0.325846       0.127000       0.297500       0.142700   -9999.000000
57481     57481     hubei          113.5697       30.9697          116       174     2012      01        03        003              0.000000       4.494751       0.000000       0.337081   -9999.000000       0.169700   -9999.000000       0.056000
57481     57481     hubei          113.5697       30.9697          116       174     2012      01        04        004              0.102042       2.400848       0.000000       0.313645   -9999.000000   -9999.000000   -9999.000000   -9999.000000
57481     57481     hubei          113.5697       30.9697          116       174     2012      01        05        005              0.126375       2.630554       0.000000       0.307500   -9999.000000       0.116900       0.122900       0.030000
57481     57481     hubei          113.5697       30.9697          116       174     2012      01        06        006              0.096833       1.963409       0.000000       0.307574       0.123000   -9999.000000       0.135900   -9999.000000
57481     57481     hubei          113.5697       30.9697          116       174     2012      01        07        007              0.113667       3.625427       0.000000       0.319542   -9999.000000       0.172500       0.144400       0.146000
57481     57481     hubei          113.5697       30.9697          116       174     2012      01        08        008              0.000000       2.590759       0.000000       0.325488       0.129000       0.097300   -9999.000000       0.014000
57481     57481     hubei          113.5697       30.9697          116       174     2012      01        09        009              0.112958       3.629761       0.000000       0.330789   -9999.000000   -9999.000000   -9999.000000   -9999.000000
57481     57481     hubei          113.5697       30.9697          116       174     2012      01        10        010              0.115792       5.125122       0.000000       0.331328   -9999.000000       0.247600       0.083900       0.155000
57481     57481     hubei          113.5697       30.9697          116       174     2012      01        11        011              0.111667       4.641693       0.000000       0.331088   -9999.000000   -9999.000000       0.087000   -9999.000000
57481     57481     hubei          113.5697       30.9697          116       174     2012      01        12        012              0.117792       3.023041       0.160406       0.330005       0.154000       0.361400       0.092200       0.161000
57481     57481     hubei          113.5697       30.9697          116       174     2012      01        13        013              0.132833       3.433777       6.536214       0.330940       0.157000       0.123600       0.093800   -9999.000000
57481     57481     hubei          113.5697       30.9697          116       174     2012      01        14        014              0.188958       3.637543       2.548527       0.335801   -9999.000000   -9999.000000   -9999.000000   -9999.000000
57481     57481     hubei          113.5697       30.9697          116       174     2012      01        15        015              0.172583       2.208496       0.398910       0.350655   -9999.000000       0.167600   -9999.000000       0.308000
57481     57481     hubei          113.5697       30.9697          116       174     2012      01        16        016              0.176708       3.421082       0.000000       0.342783   -9999.000000       0.220100       0.066300   -9999.000000
57481     57481     hubei          113.5697       30.9697          116       174     2012      01        17        017              0.000000       4.594299       1.680836       0.339256       0.166000   -9999.000000       0.086000       0.554000
57481     57481     hubei          113.5697       30.9697          116       174     2012      01        18        018              0.183500       3.908630       0.596899       0.341667   -9999.000000       0.257000       0.090900   -9999.000000
57481     57481     hubei          113.5697       30.9697          116       174     2012      01        19        019              0.174458       4.264923       0.152196       0.338918   -9999.000000   -9999.000000       0.089700   -9999.000000
57481     57481     hubei          113.5697       30.9697          116       174     2012      01        20        020              0.217542       4.316589       2.574019       0.337626   -9999.000000       0.275900   -9999.000000       0.602000
57481     57481     hubei          113.5697       30.9697          116       174     2012      01        21        021              0.208417       3.703430       0.203500       0.342168   -9999.000000       0.195600   -9999.000000   -9999.000000
57481     57481     hubei          113.5697       30.9697          116       174     2012      01        22        022              0.194292       1.593506       0.894721       0.308042   -9999.000000   -9999.000000       0.058800       0.135000
57481     57481     hubei          113.5697       30.9697          116       174     2012      01        23        023              0.202167       0.924286       0.714678       0.277070   -9999.000000       0.522600       0.103800   -9999.000000
57481     57481     hubei          113.5697       30.9697          116       174     2012      01        24        024              0.182000       1.243195       0.000000       0.284810   -9999.000000   -9999.000000   -9999.000000       0.042000
57481     57481     hubei          113.5697       30.9697          116       174     2012      01        25        025              0.169583       2.389954       0.000000       0.297294   -9999.000000       0.237600   -9999.000000       0.089000
57481     57481     hubei          113.5697       30.9697          116       174     2012      01        26        026              0.166833       2.441223       0.000000       0.295012   -9999.000000       0.083000   -9999.000000   -9999.000000
57481     57481     hubei          113.5697       30.9697          116       174     2012      01        27        027              0.192625       3.450287       0.000000       0.314117   -9999.000000   -9999.000000       0.099200       0.023000
57481     57481     hubei          113.5697       30.9697          116       174     2012      01        28        028              0.164042       2.186890       1.406884       0.319791       0.131000       0.217300       0.104400   -9999.000000
57481     57481     hubei          113.5697       30.9697          116       174     2012      01        29        029              0.173250       4.764435       0.173046       0.329406   -9999.000000   -9999.000000       0.126600       0.149000
57481     57481     hubei          113.5697       30.9697          116       174     2012      01        30        030              0.195500       3.672150       0.000000       0.332315   -9999.000000       0.071400       0.115400   -9999.000000
57481     57481     hubei          113.5697       30.9697          116       174     2012      01        31        031              0.180042       4.971924       0.000000       0.330622   -9999.000000       0.219200   -9999.000000   -9999.000000
57481     57481     hubei          113.5697       30.9697          116       174     2012      02        01        032              0.174417       5.433197       0.000000       0.330335   -9999.000000   -9999.000000   -9999.000000       0.060000
57481     57481     hubei          113.5697       30.9697          116       174     2012      02        02        033              0.171917       3.332947       0.000000       0.325804       0.138000       0.229500       0.076400   -9999.000000
57481     57481     hubei          113.5697       30.9697          116       174     2012      02        03        034              0.150042       3.173950       0.000000       0.309562       0.136000       0.169800       0.112600       0.048000
57481     57481     hubei          113.5697       30.9697          116       174     2012      02        04        035              0.172750       4.046967       0.000000       0.318483       0.154000       0.145900       0.120600   -9999.000000
57481     57481     hubei          113.5697       30.9697          116       174     2012      02        05        036              0.176042       3.253967       1.120614       0.327165   -9999.000000   -9999.000000       0.130800       0.468000
57481     57481     hubei          113.5697       30.9697          116       174     2012      02        06        037              0.182917       5.039551       0.111462       0.332130   -9999.000000   -9999.000000   -9999.000000       0.106000
57481     57481     hubei          113.5697       30.9697          116       174     2012      02        07        038              0.166583       4.924469       0.094754       0.330903   -9999.000000       0.081600   -9999.000000   -9999.000000
57481     57481     hubei          113.5697       30.9697          116       174     2012      02        08        039              0.152000       3.831268       0.130619       0.314374   -9999.000000       0.215300       0.105900       0.010000
57481     57481     hubei          113.5697       30.9697          116       174     2012      02        09        040              0.172667       3.990753       0.000000       0.320722       0.159000   -9999.000000       0.117200   -9999.000000
57481     57481     hubei          113.5697       30.9697          116       174     2012      02        10        041              0.140083       2.111633       0.307126       0.314310   -9999.000000       0.305400       0.118900       0.194000
57481     57481     hubei          113.5697       30.9697          116       174     2012      02        11        042              0.122125       4.511078       0.000000       0.314599   -9999.000000   -9999.000000   -9999.000000   -9999.000000
57481     57481     hubei          113.5697       30.9697          116       174     2012      02        12        043              0.171833       5.654022       0.433190       0.322961   -9999.000000       0.082800   -9999.000000   -9999.000000
57481     57481     hubei          113.5697       30.9697          116       174     2012      02        13        044              0.160458       4.813507       0.000000       0.326321   -9999.000000       0.096600   -9999.000000       0.019000
57481     57481     hubei          113.5697       30.9697          116       174     2012      02        14        045              0.195542       4.126587       2.234861       0.326859       0.157000   -9999.000000       0.124800   -9999.000000
57481     57481     hubei          113.5697       30.9697          116       174     2012      02        15        046              0.230750       4.047974       0.288625       0.332458   -9999.000000       0.179900       0.124500       0.495000
57481     57481     hubei          113.5697       30.9697          116       174     2012      02        16        047              0.198375       3.863007       0.000000       0.332514   -9999.000000   -9999.000000       0.119200   -9999.000000
57481     57481     hubei          113.5697       30.9697          116       174     2012      02        17        048              0.183417       6.747314       0.000000       0.329235       0.125000       0.158100   -9999.000000   -9999.000000
57481     57481     hubei          113.5697       30.9697          116       174     2012      02        18        049              0.153917       6.059509       0.000000       0.326557       0.130000       0.295300   -9999.000000       0.014000
57481     57481     hubei          113.5697       30.9697          116       174     2012      02        19        050              0.159083       6.400665       0.000000       0.323577       0.128000   -9999.000000       0.085700   -9999.000000
57481     57481     hubei          113.5697       30.9697          116       174     2012      02        20        051              0.203522       7.067017       0.000000       0.323066       0.151000       0.268900       0.089300       0.120000
57481     57481     hubei          113.5697       30.9697          116       174     2012      02        21        052              0.190833       6.236084       0.270580       0.324538   -9999.000000       0.119500   -9999.000000   -9999.000000
57481     57481     hubei          113.5697       30.9697          116       174     2012      02        22        053              0.232708       8.485718       3.221054       0.325369   -9999.000000       0.201000       0.101700   -9999.000000
57481     57481     hubei          113.5697       30.9697          116       174     2012      02        23        054              0.204250       9.399902       0.826859       0.335660       0.144500       0.305500   -9999.000000       0.322000
57481     57481     hubei          113.5697       30.9697          116       174     2012      02        24        055              0.204958       6.846069       0.000000       0.332368       0.127000   -9999.000000       0.095500   -9999.000000
57481     57481     hubei          113.5697       30.9697          116       174     2012      02        25        056              0.198833       4.976562       0.000000       0.329863   -9999.000000   -9999.000000       0.082300       0.024000
57481     57481     hubei          113.5697       30.9697          116       174     2012      02        26        057              0.176542       4.523193       0.342275       0.328084   -9999.000000   -9999.000000       0.087600   -9999.000000
57481     57481     hubei          113.5697       30.9697          116       174     2012      02        27        058              0.200130       6.132477       0.000000       0.324913   -9999.000000   -9999.000000   -9999.000000       0.004000
57481     57481     hubei          113.5697       30.9697          116       174     2012      02        28        059              0.170167       6.206757       0.000000       0.324227       0.109000       0.172300   -9999.000000   -9999.000000
57481     57481     hubei          113.5697       30.9697          116       174     2012      02        29        060              0.000000   -9999.000000       0.000000   -9999.000000       0.116000   -9999.000000   -9999.000000   -9999.000000
57481     57481     hubei          113.5697       30.9697          116       174     2012      03        01        061              0.187458       7.941010       0.000000       0.322617       0.160000       0.222700       0.082400       0.055000
57481     57481     hubei          113.5697       30.9697          116       174     2012      03        02        062              0.183542       7.500549       1.067737       0.323073   -9999.000000       0.165700       0.091700   -9999.000000
57481     57481     hubei          113.5697       30.9697          116       174     2012      03        03        063              0.215750       6.779114       3.296332       0.325378   -9999.000000   -9999.000000       0.104900       0.174000
57481     57481     hubei          113.5697       30.9697          116       174     2012      03        04        064              0.224250       5.667297       0.216686       0.333468   -9999.000000       0.182800       0.106500   -9999.000000
57481     57481     hubei          113.5697       30.9697          116       174     2012      03        05        065              0.213583       4.280182       0.000000       0.331567       0.153000   -9999.000000   -9999.000000       0.006000
57481     57481     hubei          113.5697       30.9697          116       174     2012      03        06        066              0.222083       7.536438       0.389684       0.327559       0.159000       0.160700   -9999.000000       0.083000
57481     57481     hubei          113.5697       30.9697          116       174     2012      03        07        067              0.000000       7.478119       2.623497       0.326824   -9999.000000       0.328000       0.085500   -9999.000000
57481     57481     hubei          113.5697       30.9697          116       174     2012      03        08        068              0.272208       7.222778       1.691853       0.332705   -9999.000000   -9999.000000       0.109200       0.451000
57481     57481     hubei          113.5697       30.9697          116       174     2012      03        09        069              0.226458       6.183380       0.000000       0.335440       0.141000       0.247000       0.105500   -9999.000000
57481     57481     hubei          113.5697       30.9697          116       174     2012      03        10        070              0.211333       7.260223       0.000000       0.329466       0.147000       0.183300       0.114400       0.017000
57481     57481     hubei          113.5697       30.9697          116       174     2012      03        11        071              0.217292       9.708405       0.000000       0.325580       0.137000       0.402700   -9999.000000   -9999.000000
57481     57481     hubei          113.5697       30.9697          116       174     2012      03        12        072              0.191917       8.574036       0.000000       0.323675       0.150000       0.180500       0.101800   -9999.000000
57481     57481     hubei          113.5697       30.9697          116       174     2012      03        13        073              0.183957      10.191040       0.000000       0.321633   -9999.000000   -9999.000000       0.095300       0.126000
57481     57481     hubei          113.5697       30.9697          116       174     2012      03        14        074              0.189917      12.320709       1.779144       0.318918       0.144000       0.200400       0.115100   -9999.000000
57481     57481     hubei          113.5697       30.9697          116       174     2012      03        15        075              0.266042      13.939331       4.759675       0.319794       0.166000       0.298400       0.120900       0.416000
57481     57481     hubei          113.5697       30.9697          116       174     2012      03        16        076              0.257565      10.564209       0.938538       0.337165       0.154000   -9999.000000   -9999.000000   -9999.000000
57481     57481     hubei          113.5697       30.9697          116       174     2012      03        17        077              0.255217      10.311249       0.943837       0.332167       0.159000       0.272100   -9999.000000   -9999.000000
57481     57481     hubei          113.5697       30.9697          116       174     2012      03        18        078              0.229417      11.106293       2.986300       0.330996   -9999.000000   -9999.000000       0.098000       0.184000
57481     57481     hubei          113.5697       30.9697          116       174     2012      03        19        079              0.246652      14.835114       9.284470       0.328935       0.197000       0.292300       0.144800   -9999.000000
57481     57481     hubei          113.5697       30.9697          116       174     2012      03        20        080              0.250174       7.336914       3.653892       0.345341       0.172500       0.244300       0.150900       0.394000
57481     57481     hubei          113.5697       30.9697          116       174     2012      03        21        081              0.274792       8.123718      18.147993       0.342012       0.166000   -9999.000000       0.153900   -9999.000000
57481     57481     hubei          113.5697       30.9697          116       174     2012      03        22        082              0.284208       9.340424      18.002975       0.357974   -9999.000000       0.393500   -9999.000000       0.701000
57481     57481     hubei          113.5697       30.9697          116       174     2012      03        23        083              0.236833       7.698181       0.605258       0.378104   -9999.000000   -9999.000000   -9999.000000       0.486000
57481     57481     hubei          113.5697       30.9697          116       174     2012      03        24        084              0.212292      11.432831       0.960298       0.355577   -9999.000000       0.195200   -9999.000000   -9999.000000
57481     57481     hubei          113.5697       30.9697          116       174     2012      03        25        085              0.000000      13.678253       0.071080       0.343864       0.147000       0.238900       0.135000       0.060000
57481     57481     hubei          113.5697       30.9697          116       174     2012      03        26        086              0.182875      15.639282       0.104587       0.337371       0.140000   -9999.000000       0.169800   -9999.000000
57481     57481     hubei          113.5697       30.9697          116       174     2012      03        27        087              0.182208      17.053375       1.604192       0.331796       0.142000       0.372700   -9999.000000       0.087000
57481     57481     hubei          113.5697       30.9697          116       174     2012      03        28        088              0.187083      17.968994       0.266408       0.333535   -9999.000000   -9999.000000   -9999.000000   -9999.000000
57481     57481     hubei          113.5697       30.9697          116       174     2012      03        29        089              0.212042      18.618774       5.308453       0.329289   -9999.000000       0.166000       0.165800   -9999.000000
57481     57481     hubei          113.5697       30.9697          116       174     2012      03        30        090              0.260625      17.671631       0.070534       0.337187   -9999.000000   -9999.000000       0.159100       0.345000
57481     57481     hubei          113.5697       30.9697          116       174     2012      03        31        091              0.199708      15.151611       0.000000       0.339601       0.135000   -9999.000000       0.154200   -9999.000000
57481     57481     hubei          113.5697       30.9697          116       174     2012      04        01        092              0.212000      17.007294       0.000000       0.328867       0.193000       0.108700       0.159300       0.204000
57481     57481     hubei          113.5697       30.9697          116       174     2012      04        02        093              0.197458      18.282227       0.000000       0.323623       0.186000       0.157800   -9999.000000   -9999.000000
57481     57481     hubei          113.5697       30.9697          116       174     2012      04        03        094              0.162417      18.424988       0.055949       0.319589   -9999.000000       0.172400   -9999.000000       0.218000
57481     57481     hubei          113.5697       30.9697          116       174     2012      04        04        095              0.162042      16.510376       0.365800       0.317983       0.201000   -9999.000000       0.099800       0.082000
57481     57481     hubei          113.5697       30.9697          116       174     2012      04        05        096              0.170917      13.857056       0.000000       0.322322       0.192000   -9999.000000       0.114500   -9999.000000
57481     57481     hubei          113.5697       30.9697          116       174     2012      04        06        097              0.155875      17.300415       0.000000       0.320362       0.183000   -9999.000000       0.112300       0.084000
57481     57481     hubei          113.5697       30.9697          116       174     2012      04        07        098              0.153625      19.096771       0.000000       0.317111       0.166000       0.186200       0.110300   -9999.000000
57481     57481     hubei          113.5697       30.9697          116       174     2012      04        08        099              0.142125      19.782898       0.096279       0.313550   -9999.000000   -9999.000000   -9999.000000       0.227000
57481     57481     hubei          113.5697       30.9697          116       174     2012      04        09        100              0.159708      18.984222       5.037923       0.314313       0.211000       0.233100   -9999.000000   -9999.000000
57481     57481     hubei          113.5697       30.9697          116       174     2012      04        10        101              0.163125      17.627258       1.040612       0.334327       0.200000   -9999.000000       0.081400   -9999.000000
57481     57481     hubei          113.5697       30.9697          116       174     2012      04        11        102              0.171667      18.882599       0.000000       0.328937       0.199500       0.392200       0.090700       0.069000
57481     57481     hubei          113.5697       30.9697          116       174     2012      04        12        103              0.192250      20.623047      10.520681       0.324557   -9999.000000   -9999.000000       0.104100   -9999.000000
57481     57481     hubei          113.5697       30.9697          116       174     2012      04        13        104              0.243792      15.153442       0.000000       0.349150   -9999.000000   -9999.000000   -9999.000000       0.375000
57481     57481     hubei          113.5697       30.9697          116       174     2012      04        14        105              0.242458      16.104492       0.079733       0.335695   -9999.000000       0.246100   -9999.000000   -9999.000000
57481     57481     hubei          113.5697       30.9697          116       174     2012      04        15        106              0.245292      14.415161       0.000000       0.333302       0.158000   -9999.000000       0.082600   -9999.000000
57481     57481     hubei          113.5697       30.9697          116       174     2012      04        16        107              0.244167      15.641235       0.000000       0.329762       0.202500       0.223500       0.141600       0.205000
57481     57481     hubei          113.5697       30.9697          116       174     2012      04        17        108              0.239583      19.232605       0.331408       0.325699       0.210000       0.243800       0.146900   -9999.000000
57481     57481     hubei          113.5697       30.9697          116       174     2012      04        18        109              0.242500      18.991608       0.000000       0.325565       0.199000   -9999.000000   -9999.000000       0.181000
57481     57481     hubei          113.5697       30.9697          116       174     2012      04        19        110              0.245125      20.255310       0.000000       0.321957   -9999.000000       0.295200   -9999.000000   -9999.000000
57481     57481     hubei          113.5697       30.9697          116       174     2012      04        20        111              0.249917      22.550812       0.211295       0.317476       0.240000       0.163900   -9999.000000       0.408000
57481     57481     hubei          113.5697       30.9697          116       174     2012      04        21        112              0.248083      18.685333       0.168142       0.319416       0.245000       0.193600       0.123200       0.146000
57481     57481     hubei          113.5697       30.9697          116       174     2012      04        22        113              0.242000      21.102234      18.163382       0.315114       0.243000       0.438300       0.140600   -9999.000000
57481     57481     hubei          113.5697       30.9697          116       174     2012      04        23        114              0.245375      23.279755       0.569238       0.340949       0.242000   -9999.000000       0.214500       0.577000
57481     57481     hubei          113.5697       30.9697          116       174     2012      04        24        115              0.258375      23.140625      18.926367       0.341345   -9999.000000   -9999.000000       0.229800   -9999.000000
57481     57481     hubei          113.5697       30.9697          116       174     2012      04        25        116              0.000000      20.379730       0.341992       0.368694   -9999.000000       0.600900   -9999.000000       0.380000
57481     57481     hubei          113.5697       30.9697          116       174     2012      04        26        117              0.258542      18.903595       0.000000       0.346903       0.250000   -9999.000000   -9999.000000   -9999.000000
57481     57481     hubei          113.5697       30.9697          116       174     2012      04        27        118              0.252083      20.209015       3.446094       0.336355       0.236500       0.278400   -9999.000000   -9999.000000
57481     57481     hubei          113.5697       30.9697          116       174     2012      04        28        119              0.260500      22.734619       5.963086       0.329621       0.227000   -9999.000000       0.220000       0.785000
57481     57481     hubei          113.5697       30.9697          116       174     2012      04        29        120              0.256875      23.044647       2.000098       0.340735   -9999.000000       0.254600       0.210800   -9999.000000
57481     57481     hubei          113.5697       30.9697          116       174     2012      04        30        121              0.273542      23.028137      14.357862       0.338847       0.335000       0.220200   -9999.000000       0.653000
57481     57481     hubei          113.5697       30.9697          116       174     2012      05        01        122              0.270250      21.411346       0.098978       0.361935       0.314500   -9999.000000   -9999.000000   -9999.000000
57481     57481     hubei          113.5697       30.9697          116       174     2012      05        02        123              0.269042      21.289703       2.952147       0.345385       0.286500       0.256200       0.216400       0.326000
57481     57481     hubei          113.5697       30.9697          116       174     2012      05        03        124              0.270000      23.023712       0.370447       0.341885       0.287000   -9999.000000       0.202800       0.541000
57481     57481     hubei          113.5697       30.9697          116       174     2012      05        04        125              0.268375      22.291870       0.039351       0.341259   -9999.000000       0.241700       0.203100   -9999.000000
57481     57481     hubei          113.5697       30.9697          116       174     2012      05        05        126              0.260667      23.755798       0.000000       0.334893       0.264000   -9999.000000       0.226200       0.430000
57481     57481     hubei          113.5697       30.9697          116       174     2012      05        06        127              0.254958      25.832794       0.000000       0.327767       0.219000   -9999.000000   -9999.000000   -9999.000000
57481     57481     hubei          113.5697       30.9697          116       174     2012      05        07        128              0.252958      26.712494      10.224056       0.322504   -9999.000000       0.286700   -9999.000000       0.544000
57481     57481     hubei          113.5697       30.9697          116       174     2012      05        08        129              0.249583      25.423462       0.226395       0.347808       0.289000       0.186200       0.207200   -9999.000000
57481     57481     hubei          113.5697       30.9697          116       174     2012      05        09        130              0.265667      26.520538       2.956790       0.334814       0.371000       0.333600       0.254200   -9999.000000
57481     57481     hubei          113.5697       30.9697          116       174     2012      05        10        131              0.259792      23.977325       0.000000       0.338898   -9999.000000       0.429000       0.243100       0.243000
57481     57481     hubei          113.5697       30.9697          116       174     2012      05        11        132              0.253583      26.330719       0.231630       0.327822       0.385000   -9999.000000       0.238600   -9999.000000
57481     57481     hubei          113.5697       30.9697          116       174     2012      05        12        133              0.262500      27.330048       4.514137       0.322530       0.375500   -9999.000000   -9999.000000       0.597000
57481     57481     hubei          113.5697       30.9697          116       174     2012      05        13        134              0.260625      21.476074      18.786949       0.335066       0.358000       0.433500   -9999.000000   -9999.000000
57481     57481     hubei          113.5697       30.9697          116       174     2012      05        14        135              0.276625      23.103302       1.812542       0.354503       0.363000   -9999.000000       0.210900   -9999.000000
57481     57481     hubei          113.5697       30.9697          116       174     2012      05        15        136              0.266708      20.963165       0.000000       0.355946   -9999.000000       0.359100       0.238400       0.315000
57481     57481     hubei          113.5697       30.9697          116       174     2012      05        16        137              0.259833      22.635590       0.907557       0.341425   -9999.000000   -9999.000000       0.225500   -9999.000000
57481     57481     hubei          113.5697       30.9697          116       174     2012      05        17        138              0.256583      24.325684       1.325377       0.332689       0.311500       0.365800   -9999.000000       0.240000
57481     57481     hubei          113.5697       30.9697          116       174     2012      05        18        139              0.263167      26.017792       2.490399       0.325728       0.343500       0.268000   -9999.000000   -9999.000000
57481     57481     hubei          113.5697       30.9697          116       174     2012      05        19        140              0.265542      24.065247       0.000000       0.331009       0.319000   -9999.000000       0.234800       0.052000
57481     57481     hubei          113.5697       30.9697          116       174     2012      05        20        141              0.264542      24.834686       0.000000       0.324623   -9999.000000       0.365900       0.228400       0.101000
57481     57481     hubei          113.5697       30.9697          116       174     2012      05        21        142              0.258583      25.251556       0.000000       0.317736       0.382000   -9999.000000       0.224200   -9999.000000
57481     57481     hubei          113.5697       30.9697          116       174     2012      05        22        143              0.259167      25.045349       2.372065       0.315016       0.370000       0.281900       0.236500       0.574000
57481     57481     hubei          113.5697       30.9697          116       174     2012      05        23        144              0.272958      23.669189       2.632607       0.322137   -9999.000000       0.339300   -9999.000000   -9999.000000
57481     57481     hubei          113.5697       30.9697          116       174     2012      05        24        145              0.280250      23.194489       4.258055       0.328197   -9999.000000   -9999.000000   -9999.000000       0.560000
57481     57481     hubei          113.5697       30.9697          116       174     2012      05        25        146              0.000000      21.852600       0.265288       0.336006   -9999.000000       0.588700       0.203700   -9999.000000
57481     57481     hubei          113.5697       30.9697          116       174     2012      05        26        147              0.269333      21.853546       0.000000       0.329716       0.460000       0.201600       0.243300   -9999.000000
57481     57481     hubei          113.5697       30.9697          116       174     2012      05        27        148              0.268083      24.892822       0.000000       0.321230       0.367500       0.517000       0.237500       0.123000
57481     57481     hubei          113.5697       30.9697          116       174     2012      05        28        149              0.262208      26.075104       7.087828       0.317439       0.363500       0.521600       0.229500   -9999.000000
57481     57481     hubei          113.5697       30.9697          116       174     2012      05        29        150              0.284750      27.873840      58.019493       0.321461   -9999.000000   -9999.000000   -9999.000000       0.737000
57481     57481     hubei          113.5697       30.9697          116       174     2012      05        30        151              0.270625      22.248260       0.000000       0.398106       0.420000       0.480300       0.263100   -9999.000000
57481     57481     hubei          113.5697       30.9697          116       174     2012      05        31        152              0.268917      25.414978       0.000000       0.359127   -9999.000000   -9999.000000   -9999.000000   -9999.000000
57481     57481     hubei          113.5697       30.9697          116       174     2012      06        01        153              0.265208      25.250641       3.422478       0.347660   -9999.000000   -9999.000000       0.280400       0.149000
57481     57481     hubei          113.5697       30.9697          116       174     2012      06        02        154              0.268750      23.090454       0.000000       0.351995       0.359000       0.521000       0.284100   -9999.000000
57481     57481     hubei          113.5697       30.9697          116       174     2012      06        03        155              0.264833      25.385284       1.350042       0.341296       0.429000   -9999.000000   -9999.000000       0.472000
57481     57481     hubei          113.5697       30.9697          116       174     2012      06        04        156              0.269042      25.098022       0.000000       0.339769       0.423000       0.656700   -9999.000000   -9999.000000
57481     57481     hubei          113.5697       30.9697          116       174     2012      06        05        157              0.270917      25.829681       7.523888       0.336224   -9999.000000       0.681100       0.254700       0.616000
57481     57481     hubei          113.5697       30.9697          116       174     2012      06        06        158              0.284167      26.448303       0.918087       0.341098       0.413000   -9999.000000       0.261000   -9999.000000
57481     57481     hubei          113.5697       30.9697          116       174     2012      06        07        159              0.284125      25.838898       0.345799       0.347808       0.392000       0.585700       0.334400   -9999.000000
57481     57481     hubei          113.5697       30.9697          116       174     2012      06        08        160              0.279542      27.884705       0.039489       0.337367       0.384500   -9999.000000       0.267300       0.661000
57481     57481     hubei          113.5697       30.9697          116       174     2012      06        09        161              0.274875      29.069305       0.150962       0.330663       0.368000       0.239300   -9999.000000   -9999.000000
57481     57481     hubei          113.5697       30.9697          116       174     2012      06        10        162              0.275542      30.477417       0.000000       0.324888   -9999.000000       0.429600   -9999.000000       0.585000
57481     57481     hubei          113.5697       30.9697          116       174     2012      06        11        163              0.000000      28.180695       0.090336       0.322417       0.341000   -9999.000000       0.199600   -9999.000000
57481     57481     hubei          113.5697       30.9697          116       174     2012      06        12        164              0.273250      27.586517       0.000000       0.319478       0.330000       0.391500       0.215200   -9999.000000
57481     57481     hubei          113.5697       30.9697          116       174     2012      06        13        165              0.269250      28.608246       0.000000       0.313298       0.355500       0.405300       0.244100       0.434000
57481     57481     hubei          113.5697       30.9697          116       174     2012      06        14        166              0.263083      29.279144       0.576335       0.309014       0.332500   -9999.000000       0.253700   -9999.000000
57481     57481     hubei          113.5697       30.9697          116       174     2012      06        15        167              0.262875      28.524475       0.000000       0.310268       0.325000       0.564600   -9999.000000       0.446000
57481     57481     hubei          113.5697       30.9697          116       174     2012      06        16        168              0.259250      28.211853       0.000000       0.303336   -9999.000000   -9999.000000       0.190400   -9999.000000
57481     57481     hubei          113.5697       30.9697          116       174     2012      06        17        169              0.253458      28.494873       0.000000       0.299823       0.336000   -9999.000000       0.184500       0.159000
57481     57481     hubei          113.5697       30.9697          116       174     2012      06        18        170              0.251583      27.312561       0.086540       0.299834       0.298000       0.432500       0.184100       0.264000
57481     57481     hubei          113.5697       30.9697          116       174     2012      06        19        171              0.247417      29.085846       0.000000       0.297360       0.302500   -9999.000000       0.211600   -9999.000000
57481     57481     hubei          113.5697       30.9697          116       174     2012      06        20        172              0.245125      29.604279       0.744136       0.291460       0.311000       0.556800   -9999.000000       0.146000
57481     57481     hubei          113.5697       30.9697          116       174     2012      06        21        173              0.244583      30.219818       0.073914       0.288255   -9999.000000   -9999.000000   -9999.000000   -9999.000000
57481     57481     hubei          113.5697       30.9697          116       174     2012      06        22        174              0.243375      30.623779       0.000000       0.285400       0.318000   -9999.000000       0.161400       0.131000
57481     57481     hubei          113.5697       30.9697          116       174     2012      06        23        175              0.242417      30.639252       0.000000       0.280386       0.303500       0.341600       0.181400   -9999.000000
57481     57481     hubei          113.5697       30.9697          116       174     2012      06        24        176              0.240625      31.027161       0.135366       0.276343       0.301500   -9999.000000       0.178300   -9999.000000
57481     57481     hubei          113.5697       30.9697          116       174     2012      06        25        177              0.241083      31.400055       0.092779       0.270410       0.277000       0.293500       0.118300       0.065000
57481     57481     hubei          113.5697       30.9697          116       174     2012      06        26        178              0.259917      30.321350      31.437073       0.270484   -9999.000000   -9999.000000   -9999.000000   -9999.000000
57481     57481     hubei          113.5697       30.9697          116       174     2012      06        27        179              0.293500      27.977570      36.636654       0.333157       0.415000   -9999.000000   -9999.000000       0.770000
57481     57481     hubei          113.5697       30.9697          116       174     2012      06        28        180              0.292783      26.106079      13.005576       0.388978       0.408000       0.300800       0.118500   -9999.000000
57481     57481     hubei          113.5697       30.9697          116       174     2012      06        29        181              0.285792      26.885223       0.000000       0.379428       0.381500   -9999.000000       0.129800       0.633000
57481     57481     hubei          113.5697       30.9697          116       174     2012      06        30        182              0.285667      29.978394       0.340441       0.354143       0.356000       0.319500       0.136900   -9999.000000
57481     57481     hubei          113.5697       30.9697          116       174     2012      07        01        183              0.284045      28.035522       0.036271       0.345147   -9999.000000       0.398700   -9999.000000   -9999.000000
57481     57481     hubei          113.5697       30.9697          116       174     2012      07        02        184              0.278667      28.453918       0.000000       0.340500       0.319000       0.447700   -9999.000000       0.553000
57481     57481     hubei          113.5697       30.9697          116       174     2012      07        03        185              0.274083      30.839142       5.509893       0.331935       0.283000       0.445200       0.174400   -9999.000000
57481     57481     hubei          113.5697       30.9697          116       174     2012      07        04        186              0.264500      31.362915       0.222877       0.325146       0.309500   -9999.000000       0.168200       0.193000
57481     57481     hubei          113.5697       30.9697          116       174     2012      07        05        187              0.263583      30.739471       3.422811       0.320434       0.292000       0.325100       0.181700   -9999.000000
57481     57481     hubei          113.5697       30.9697          116       174     2012      07        06        188              0.255750      29.185150       0.000000       0.329313   -9999.000000       0.338700       0.191000   -9999.000000
57481     57481     hubei          113.5697       30.9697          116       174     2012      07        07        189              0.248083      31.450256       0.000000       0.325033   -9999.000000   -9999.000000   -9999.000000       0.173000
57481     57481     hubei          113.5697       30.9697          116       174     2012      07        08        190              0.242958      31.748444       0.000000       0.317276       0.312000       0.286600   -9999.000000   -9999.000000
57481     57481     hubei          113.5697       30.9697          116       174     2012      07        09        191              0.239792      31.885620       0.000000       0.310541       0.289500   -9999.000000       0.122800       0.321000
57481     57481     hubei          113.5697       30.9697          116       174     2012      07        10        192              0.246583      31.852509      14.299553       0.305144       0.300500       0.444800       0.154800   -9999.000000
57481     57481     hubei          113.5697       30.9697          116       174     2012      07        11        193              0.249250      31.212097       1.853131       0.338333       0.337000       0.274100       0.148600   -9999.000000
57481     57481     hubei          113.5697       30.9697          116       174     2012      07        12        194              0.282000      31.579956      26.800806       0.334107   -9999.000000   -9999.000000       0.156500       0.545000
57481     57481     hubei          113.5697       30.9697          116       174     2012      07        13        195              0.301522      28.781616      45.200016       0.362737   -9999.000000       0.448100   -9999.000000   -9999.000000
57481     57481     hubei          113.5697       30.9697          116       174     2012      07        14        196              0.281583      27.212311       0.928817       0.398033       0.401500   -9999.000000   -9999.000000       0.633000
57481     57481     hubei          113.5697       30.9697          116       174     2012      07        15        197              0.280000      29.237488       0.093214       0.360255       0.400500       0.404600       0.148500   -9999.000000
57481     57481     hubei          113.5697       30.9697          116       174     2012      07        16        198              0.275500      28.515625       1.295856       0.351011       0.351000       0.357200       0.159200       0.468000
57481     57481     hubei          113.5697       30.9697          116       174     2012      07        17        199              0.269583      29.707703       2.416441       0.343309   -9999.000000   -9999.000000       0.170500       0.142000
57481     57481     hubei          113.5697       30.9697          116       174     2012      07        18        200              0.263875      29.989319       0.000000       0.337599       0.373000       0.225200   -9999.000000   -9999.000000
57481     57481     hubei          113.5697       30.9697          116       174     2012      07        19        201              0.261500      30.092377       1.443985       0.332932       0.442000       0.410100   -9999.000000       0.351000
57481     57481     hubei          113.5697       30.9697          116       174     2012      07        20        202              0.256458      30.040710       0.743541       0.333883       0.372000       0.476600       0.143400   -9999.000000
57481     57481     hubei          113.5697       30.9697          116       174     2012      07        21        203              0.253522      31.057037       0.000000       0.332292       0.404000       0.588000       0.154400       0.198000
57481     57481     hubei          113.5697       30.9697          116       174     2012      07        22        204              0.256833      32.326691       0.779796       0.325941       0.393000   -9999.000000       0.153100   -9999.000000
57481     57481     hubei          113.5697       30.9697          116       174     2012      07        23        205              0.251833      32.031494       0.625202       0.324831   -9999.000000       0.229900       0.213800   -9999.000000
57481     57481     hubei          113.5697       30.9697          116       174     2012      07        24        206              0.252458      32.175232       0.000000       0.321695       0.413000       0.328500   -9999.000000       0.167000
57481     57481     hubei          113.5697       30.9697          116       174     2012      07        25        207              0.250417      32.503998       0.000000       0.316236       0.382000       0.116300   -9999.000000   -9999.000000
57481     57481     hubei          113.5697       30.9697          116       174     2012      07        26        208              0.247958      32.743347       0.000000       0.311674       0.383000       0.394700       0.174800       0.073000
57481     57481     hubei          113.5697       30.9697          116       174     2012      07        27        209              0.248083      32.722931       0.551682       0.306980   -9999.000000   -9999.000000       0.204600   -9999.000000
57481     57481     hubei          113.5697       30.9697          116       174     2012      07        28        210              0.246917      32.784546       0.000000       0.306416   -9999.000000       0.552400       0.209200       0.308000
57481     57481     hubei          113.5697       30.9697          116       174     2012      07        29        211              0.244833      32.944153       0.000000       0.301950       0.386000       0.271900       0.192000       0.268000
57481     57481     hubei          113.5697       30.9697          116       174     2012      07        30        212              0.243625      33.011292       0.000000       0.296686       0.349500   -9999.000000   -9999.000000   -9999.000000
57481     57481     hubei          113.5697       30.9697          116       174     2012      07        31        213              0.243917      33.456207       0.919429       0.292758       0.365500       0.387500       0.206700       0.252000
57481     57481     hubei          113.5697       30.9697          116       174     2012      08        01        214              0.239875      33.793793       0.000000       0.291247       0.366000   -9999.000000       0.203000   -9999.000000
57481     57481     hubei          113.5697       30.9697          116       174     2012      08        02        215              0.236875      32.148560       0.000000       0.290250       0.350000       0.264900       0.211500       0.203000
57481     57481     hubei          113.5697       30.9697          116       174     2012      08        03        216              0.236458      30.929382       0.161003       0.284381   -9999.000000       0.331900       0.220500   -9999.000000
57481     57481     hubei          113.5697       30.9697          116       174     2012      08        04        217              0.235250      30.945343       5.602803       0.278893       0.406000   -9999.000000   -9999.000000   -9999.000000
57481     57481     hubei          113.5697       30.9697          116       174     2012      08        05        218              0.239583      29.715149       1.365060       0.297643       0.365500       0.269600   -9999.000000       0.127000
57481     57481     hubei          113.5697       30.9697          116       174     2012      08        06        219              0.239292      30.836945       0.000000       0.307425       0.369000       0.233900       0.176000   -9999.000000
57481     57481     hubei          113.5697       30.9697          116       174     2012      08        07        220              0.237000      31.080994       0.202332       0.294497       0.339000       0.195600       0.178000       0.371000
57481     57481     hubei          113.5697       30.9697          116       174     2012      08        08        221              0.233625      31.272827       3.953516       0.286739   -9999.000000       0.276000       0.183300   -9999.000000
57481     57481     hubei          113.5697       30.9697          116       174     2012      08        09        222              0.231833      31.077362       0.104958       0.280465       0.397000   -9999.000000       0.194600   -9999.000000
57481     57481     hubei          113.5697       30.9697          116       174     2012      08        10        223              0.231583      30.975128       0.387785       0.275122       0.387000       0.137600   -9999.000000       0.136000
57481     57481     hubei          113.5697       30.9697          116       174     2012      08        11        224              0.233625      29.586609       0.258559       0.275322       0.343500       0.264900   -9999.000000   -9999.000000
57481     57481     hubei          113.5697       30.9697          116       174     2012      08        12        225              0.236375      29.978119       0.000000       0.278520       0.277000       0.160700       0.161000       0.241000
57481     57481     hubei          113.5697       30.9697          116       174     2012      08        13        226              0.231042      32.724274       1.867128       0.272439   -9999.000000       0.270000       0.163700   -9999.000000
57481     57481     hubei          113.5697       30.9697          116       174     2012      08        14        227              0.233542      30.276794       1.282345       0.273559   -9999.000000   -9999.000000       0.148900       0.207000
57481     57481     hubei          113.5697       30.9697          116       174     2012      08        15        228              0.235708      29.006683       0.000000       0.292270       0.369000   -9999.000000       0.152500       0.267000
57481     57481     hubei          113.5697       30.9697          116       174     2012      08        16        229              0.233458      30.425781       0.000000       0.281288       0.317500       0.237100   -9999.000000   -9999.000000
57481     57481     hubei          113.5697       30.9697          116       174     2012      08        17        230              0.234417      30.323212       0.000000       0.272869       0.329000   -9999.000000       0.148100       0.013000
57481     57481     hubei          113.5697       30.9697          116       174     2012      08        18        231              0.234000      32.815216       0.890999       0.267213       0.289000       0.434700       0.143900   -9999.000000
57481     57481     hubei          113.5697       30.9697          116       174     2012      08        19        232              0.233042      33.082764       6.119268       0.263384   -9999.000000   -9999.000000       0.147400       0.262000
57481     57481     hubei          113.5697       30.9697          116       174     2012      08        20        233              0.260917      32.273499      51.217445       0.281746   -9999.000000       0.189500       0.155600   -9999.000000
57481     57481     hubei          113.5697       30.9697          116       174     2012      08        21        234              0.285500      30.508301       1.726444       0.368325       0.371500       0.375400   -9999.000000   -9999.000000
57481     57481     hubei          113.5697       30.9697          116       174     2012      08        22        235              0.282750      25.820740       0.000000       0.364530       0.385000   -9999.000000   -9999.000000   -9999.000000
57481     57481     hubei          113.5697       30.9697          116       174     2012      08        23        236              0.275333      24.483429       0.000000       0.340016       0.293000       0.322500       0.177300   -9999.000000
57481     57481     hubei          113.5697       30.9697          116       174     2012      08        24        237              0.276333      25.276764       0.000000       0.329486   -9999.000000   -9999.000000       0.192100       0.324000
57481     57481     hubei          113.5697       30.9697          116       174     2012      08        25        238              0.000000      26.816071       0.000000       0.321068       0.336000       0.337200       0.189900   -9999.000000
57481     57481     hubei          113.5697       30.9697          116       174     2012      08        26        239              0.268417      28.516479       1.097896       0.314908       0.386000       0.398100       0.185600       0.472000
57481     57481     hubei          113.5697       30.9697          116       174     2012      08        27        240              0.270625      26.903412      25.814213       0.317035       0.337500   -9999.000000   -9999.000000       0.016000
57481     57481     hubei          113.5697       30.9697          116       174     2012      08        28        241              0.266625      26.735291       0.111684       0.314303       0.327000       0.210200   -9999.000000   -9999.000000
57481     57481     hubei          113.5697       30.9697          116       174     2012      08        29        242              0.264917      28.566406       0.000000       0.308550       0.315000       0.177100       0.127100       0.396000
57481     57481     hubei          113.5697       30.9697          116       174     2012      08        30        243              0.258833      29.900085       0.000000       0.302352   -9999.000000       0.032600       0.146400   -9999.000000
57481     57481     hubei          113.5697       30.9697          116       174     2012      08        31        244              0.261958      29.780823       0.000000       0.298589       0.356000       0.288500       0.151300       0.362000
57481     57481     hubei          113.5697       30.9697          116       174     2012      09        01        245              0.255792      30.663330       1.456985       0.294486       0.282000   -9999.000000   -9999.000000   -9999.000000
57481     57481     hubei          113.5697       30.9697          116       174     2012      09        02        246              0.245958      31.351776       0.677148       0.289100       0.286500       0.358700   -9999.000000   -9999.000000
57481     57481     hubei          113.5697       30.9697          116       174     2012      09        03        247              0.252292      26.304657       0.000000       0.290871       0.261000       0.219600       0.137600       0.342000
57481     57481     hubei          113.5697       30.9697          116       174     2012      09        04        248              0.258833      27.231750       0.000000       0.285248   -9999.000000   -9999.000000       0.139000   -9999.000000
57481     57481     hubei          113.5697       30.9697          116       174     2012      09        05        249              0.259375      27.277222       0.000000       0.279388       0.278000       0.319200       0.138600       0.243000
57481     57481     hubei          113.5697       30.9697          116       174     2012      09        06        250              0.262250      27.393280       1.144130       0.273626       0.254000   -9999.000000       0.142100   -9999.000000
57481     57481     hubei          113.5697       30.9697          116       174     2012      09        07        251              0.263250      27.509064       0.884310       0.275555       0.250000       0.129200   -9999.000000   -9999.000000
57481     57481     hubei          113.5697       30.9697          116       174     2012      09        08        252              0.260833      28.670013      30.805864       0.282506   -9999.000000       0.164300   -9999.000000       0.721000
57481     57481     hubei          113.5697       30.9697          116       174     2012      09        09        253              0.273542      24.941132       2.503855       0.386503       0.322000   -9999.000000       0.141600   -9999.000000
57481     57481     hubei          113.5697       30.9697          116       174     2012      09        10        254              0.265708      24.756531       0.000000       0.342886   -9999.000000       0.178400       0.153700       0.547000
57481     57481     hubei          113.5697       30.9697          116       174     2012      09        11        255              0.260333      26.191650       0.102857       0.330337       0.268000   -9999.000000       0.165500   -9999.000000
57481     57481     hubei          113.5697       30.9697          116       174     2012      09        12        256              0.267917      26.008575       7.664594       0.325455       0.266000       0.191100       0.153600       0.745000
57481     57481     hubei          113.5697       30.9697          116       174     2012      09        13        257              0.277000      22.912567       0.087357       0.342744       0.233000       0.341600   -9999.000000       0.489000
57481     57481     hubei          113.5697       30.9697          116       174     2012      09        14        258              0.259875      21.720978       0.071084       0.329294       0.212000   -9999.000000   -9999.000000   -9999.000000
57481     57481     hubei          113.5697       30.9697          116       174     2012      09        15        259              0.254042      22.706299       0.000000       0.320203   -9999.000000       0.117100       0.127000       0.307000
57481     57481     hubei          113.5697       30.9697          116       174     2012      09        16        260              0.255083      22.928070       0.000000       0.314229       0.254000       0.162500       0.149900   -9999.000000
57481     57481     hubei          113.5697       30.9697          116       174     2012      09        17        261              0.250333      22.899658       0.000000       0.310681       0.231500       0.145700       0.138600       0.403000
57481     57481     hubei          113.5697       30.9697          116       174     2012      09        18        262              0.255833      23.201904       0.000000       0.307401       0.230000   -9999.000000   -9999.000000   -9999.000000
57481     57481     hubei          113.5697       30.9697          116       174     2012      09        19        263              0.254083      23.893646       0.599833       0.303542       0.221000   -9999.000000   -9999.000000   -9999.000000
57481     57481     hubei          113.5697       30.9697          116       174     2012      09        20        264              0.255833      24.673126       0.150904       0.299608   -9999.000000       0.243000       0.118200       0.372000
57481     57481     hubei          113.5697       30.9697          116       174     2012      09        21        265              0.249583      25.784882       0.270041       0.296747   -9999.000000       0.118500       0.118700   -9999.000000
57481     57481     hubei          113.5697       30.9697          116       174     2012      09        22        266              0.242375      23.003998       0.000000       0.299622       0.236500   -9999.000000       0.123400       0.369000
57481     57481     hubei          113.5697       30.9697          116       174     2012      09        23        267              0.250792      25.382782       0.070130       0.296186       0.261500       0.235500       0.141300   -9999.000000
57481     57481     hubei          113.5697       30.9697          116       174     2012      09        24        268              0.240625      24.606262       0.000000       0.296009       0.263000   -9999.000000   -9999.000000       0.348000
57481     57481     hubei          113.5697       30.9697          116       174     2012      09        25        269              0.245875      25.611572       0.469352       0.290280       0.260000       0.284600   -9999.000000       0.373000
57481     57481     hubei          113.5697       30.9697          116       174     2012      09        26        270              0.241292      25.915649       0.000000       0.288134   -9999.000000       0.170300       0.115700   -9999.000000
57481     57481     hubei          113.5697       30.9697          116       174     2012      09        27        271              0.243857      24.850647       0.000000       0.287427       0.255000   -9999.000000       0.132500       0.459000
57481     57481     hubei          113.5697       30.9697          116       174     2012      09        28        272              0.233938      25.382477       0.000000       0.281322       0.246000   -9999.000000       0.141200   -9999.000000
57481     57481     hubei          113.5697       30.9697          116       174     2012      09        29        273              0.225542      21.776001       0.000000       0.273936       0.245000   -9999.000000       0.134400       0.149000
57481     57481     hubei          113.5697       30.9697          116       174     2012      09        30        274              0.230708      21.603058       0.000000       0.272080       0.241000   -9999.000000   -9999.000000   -9999.000000
57481     57481     hubei          113.5697       30.9697          116       174     2012      10        01        275              0.223625      20.540070       0.000000       0.273256   -9999.000000   -9999.000000   -9999.000000   -9999.000000
57481     57481     hubei          113.5697       30.9697          116       174     2012      10        02        276              0.226125      21.519318       0.052270       0.270102       0.225000   -9999.000000       0.082200       0.284000
57481     57481     hubei          113.5697       30.9697          116       174     2012      10        03        277              0.231417      22.510529       0.196331       0.268628       0.223500       0.158200       0.092300   -9999.000000
57481     57481     hubei          113.5697       30.9697          116       174     2012      10        04        278              0.228792      21.420319       0.111573       0.270757       0.222000       0.188600       0.100000       0.292000
57481     57481     hubei          113.5697       30.9697          116       174     2012      10        05        279              0.232208      22.568207       1.307846       0.270068       0.248000       0.105100   -9999.000000   -9999.000000
57481     57481     hubei          113.5697       30.9697          116       174     2012      10        06        280              0.236958      20.478302       0.054794       0.281608       0.240000       0.361400   -9999.000000   -9999.000000
57481     57481     hubei          113.5697       30.9697          116       174     2012      10        07        281              0.234875      22.794464       0.459516       0.277867   -9999.000000   -9999.000000       0.087200       0.169000
57481     57481     hubei          113.5697       30.9697          116       174     2012      10        08        282              0.236042      21.663361       0.220406       0.281568       0.256000       0.283100       0.084500   -9999.000000
57481     57481     hubei          113.5697       30.9697          116       174     2012      10        09        283              0.227833      22.743774       0.000000       0.279463       0.229000       0.211900       0.092700       0.263000
57481     57481     hubei          113.5697       30.9697          116       174     2012      10        10        284              0.224167      22.883148       0.000000       0.274765       0.231000   -9999.000000       0.086400   -9999.000000
57481     57481     hubei          113.5697       30.9697          116       174     2012      10        11        285              0.232625      22.191315       0.000000       0.269377       0.184000       0.270900   -9999.000000       0.259000
57481     57481     hubei          113.5697       30.9697          116       174     2012      10        12        286              0.229625      21.503418       0.072927       0.269995   -9999.000000   -9999.000000   -9999.000000       0.188000
57481     57481     hubei          113.5697       30.9697          116       174     2012      10        13        287              0.227833      20.888763       0.000000       0.271680       0.191000       0.166500       0.064300   -9999.000000
57481     57481     hubei          113.5697       30.9697          116       174     2012      10        14        288              0.229833      20.092468       0.190026       0.273275       0.187000       0.156800       0.088100       0.176000
57481     57481     hubei          113.5697       30.9697          116       174     2012      10        15        289              0.242583      21.697113      18.061554       0.272552       0.251000   -9999.000000       0.119400   -9999.000000
57481     57481     hubei          113.5697       30.9697          116       174     2012      10        16        290              0.273208      20.299988       4.521974       0.333050       0.224000       0.168000       0.119100       0.711000
57481     57481     hubei          113.5697       30.9697          116       174     2012      10        17        291              0.266500      18.118011       0.000000       0.337087   -9999.000000   -9999.000000   -9999.000000   -9999.000000
57481     57481     hubei          113.5697       30.9697          116       174     2012      10        18        292              0.264125      17.842316       0.000000       0.317943       0.188000       0.374900       0.106200   -9999.000000
57481     57481     hubei          113.5697       30.9697          116       174     2012      10        19        293              0.265565      18.506256       0.000000       0.310642       0.190500       0.371500       0.100400       0.324000
57481     57481     hubei          113.5697       30.9697          116       174     2012      10        20        294              0.264458      19.638458       0.090799       0.307647       0.197500   -9999.000000       0.115100   -9999.000000
57481     57481     hubei          113.5697       30.9697          116       174     2012      10        21        295              0.274792      21.913025       8.741609       0.305141       0.268500       0.175700       0.111600       0.389000
57481     57481     hubei          113.5697       30.9697          116       174     2012      10        22        296              0.270333      21.861694       0.000000       0.323380   -9999.000000       0.222500   -9999.000000   -9999.000000
57481     57481     hubei          113.5697       30.9697          116       174     2012      10        23        297              0.263125      16.407318       0.047786       0.321911   -9999.000000       0.248400   -9999.000000       0.403000
57481     57481     hubei          113.5697       30.9697          116       174     2012      10        24        298              0.264583      17.551727       0.000000       0.313966   -9999.000000   -9999.000000       0.078000       0.198000
57481     57481     hubei          113.5697       30.9697          116       174     2012      10        25        299              0.000000      16.088715       6.518631       0.312588       0.262500   -9999.000000       0.081900   -9999.000000
57481     57481     hubei          113.5697       30.9697          116       174     2012      10        26        300              0.286208      17.296234      30.898327       0.322374       0.307000       0.340500       0.120200       0.999000
57481     57481     hubei          113.5697       30.9697          116       174     2012      10        27        301              0.271125      16.432648       0.270885       0.377621       0.291000       0.201000       0.105200   -9999.000000
57481     57481     hubei          113.5697       30.9697          116       174     2012      10        28        302              0.000000      18.245514      19.473114       0.348032   -9999.000000   -9999.000000   -9999.000000       0.581000
57481     57481     hubei          113.5697       30.9697          116       174     2012      10        29        303              0.292125      19.325653      18.864424       0.350778   -9999.000000       0.512200   -9999.000000   -9999.000000
57481     57481     hubei          113.5697       30.9697          116       174     2012      10        30        304              0.285667      16.963959       0.000000       0.383887       0.262000   -9999.000000       0.120900   -9999.000000
57481     57481     hubei          113.5697       30.9697          116       174     2012      10        31        305              0.281042      16.085144       0.000000       0.357062       0.246000       0.227400       0.135500       0.444000
57481     57481     hubei          113.5697       30.9697          116       174     2012      11        01        306              0.286208      15.792938       0.000000       0.347827       0.242000       0.278000       0.151100   -9999.000000
57481     57481     hubei          113.5697       30.9697          116       174     2012      11        02        307              0.272458      14.690552       0.456936       0.342638       0.277000   -9999.000000   -9999.000000       0.646000
57481     57481     hubei          113.5697       30.9697          116       174     2012      11        03        308              0.289375      15.888550       4.399311       0.338334   -9999.000000       0.280300   -9999.000000   -9999.000000
57481     57481     hubei          113.5697       30.9697          116       174     2012      11        04        309              0.279870      12.188171       0.000000       0.348015   -9999.000000   -9999.000000       0.131600   -9999.000000
57481     57481     hubei          113.5697       30.9697          116       174     2012      11        05        310              0.276542      12.921814       0.277930       0.337877       0.235000       0.235000       0.123400       0.409000
57481     57481     hubei          113.5697       30.9697          116       174     2012      11        06        311              0.276083      12.446198       0.000000       0.333804       0.225000       0.371700       0.137100   -9999.000000
57481     57481     hubei          113.5697       30.9697          116       174     2012      11        07        312              0.277458      12.552002       0.411321       0.331037       0.260000   -9999.000000       0.147400       0.482000
57481     57481     hubei          113.5697       30.9697          116       174     2012      11        08        313              0.279833      12.754974       0.331468       0.331116   -9999.000000       0.184700   -9999.000000   -9999.000000
57481     57481     hubei          113.5697       30.9697          116       174     2012      11        09        314              0.270833      12.824402       2.966641       0.330319       0.282000       0.441000   -9999.000000       0.715000
57481     57481     hubei          113.5697       30.9697          116       174     2012      11        10        315              0.285417      11.650421       0.333795       0.338652       0.230000   -9999.000000       0.107400       0.561000
57481     57481     hubei          113.5697       30.9697          116       174     2012      11        11        316              0.277208      11.696686       0.000000       0.333696       0.196000   -9999.000000       0.129700   -9999.000000
57481     57481     hubei          113.5697       30.9697          116       174     2012      11        12        317              0.274250      11.281769       0.000000       0.329305       0.205000   -9999.000000       0.133700       0.429000
57481     57481     hubei          113.5697       30.9697          116       174     2012      11        13        318              0.000000      11.783936       0.000000       0.327535   -9999.000000       0.322100       0.137300   -9999.000000
57481     57481     hubei          113.5697       30.9697          116       174     2012      11        14        319              0.265917      13.838531       0.264410       0.326097       0.229000       0.175100   -9999.000000       0.453000
57481     57481     hubei          113.5697       30.9697          116       174     2012      11        15        320              0.271667      14.167572       2.293112       0.324519       0.270000   -9999.000000   -9999.000000   -9999.000000
57481     57481     hubei          113.5697       30.9697          116       174     2012      11        16        321              0.266250      10.717499       0.663435       0.330550       0.203000       0.368500       0.111700   -9999.000000
57481     57481     hubei          113.5697       30.9697          116       174     2012      11        17        322              0.000000      10.387970      10.754827       0.330780       0.211000   -9999.000000       0.121800       0.195000
57481     57481     hubei          113.5697       30.9697          116       174     2012      11        18        323              0.268833      10.760315       0.000000       0.327472       0.217000   -9999.000000       0.133000   -9999.000000
57481     57481     hubei          113.5697       30.9697          116       174     2012      11        19        324              0.263208      12.142975       0.238658       0.325635   -9999.000000       0.126300   -9999.000000       0.353000
57481     57481     hubei          113.5697       30.9697          116       174     2012      11        20        325              0.274208      13.164459       4.032531       0.324534       0.252000   -9999.000000   -9999.000000   -9999.000000
57481     57481     hubei          113.5697       30.9697          116       174     2012      11        21        326              0.279667      12.618774       0.000000       0.332988       0.218000       0.211000       0.101800       0.451000
57481     57481     hubei          113.5697       30.9697          116       174     2012      11        22        327              0.286542      11.757690       0.704121       0.332328       0.236500   -9999.000000       0.099600       0.725000
57481     57481     hubei          113.5697       30.9697          116       174     2012      11        23        328              0.285875      11.124359       0.000000       0.330961       0.213000   -9999.000000       0.111400   -9999.000000
57481     57481     hubei          113.5697       30.9697          116       174     2012      11        24        329              0.284708       8.610077       1.436445       0.327696   -9999.000000       0.309700       0.115500       0.345000
57481     57481     hubei          113.5697       30.9697          116       174     2012      11        25        330              0.290375       9.422699       0.129645       0.329678   -9999.000000   -9999.000000   -9999.000000   -9999.000000
57481     57481     hubei          113.5697       30.9697          116       174     2012      11        26        331              0.276417       8.006805       0.112526       0.330551       0.188000       0.310500   -9999.000000       0.228000
57481     57481     hubei          113.5697       30.9697          116       174     2012      11        27        332              0.277458       8.751495       0.175576       0.326635       0.183000       0.482900       0.095600   -9999.000000
57481     57481     hubei          113.5697       30.9697          116       174     2012      11        28        333              0.270250       9.336823       0.000000       0.325804       0.199000       0.254000       0.123900   -9999.000000
57481     57481     hubei          113.5697       30.9697          116       174     2012      11        29        334              0.269458       9.413361       1.420536       0.324291       0.225000       0.239500       0.129000       0.504000
57481     57481     hubei          113.5697       30.9697          116       174     2012      11        30        335              0.274500       9.823395       0.000000       0.327370   -9999.000000   -9999.000000       0.137400   -9999.000000
57481     57481     hubei          113.5697       30.9697          116       174     2012      12        01        336              0.275125      10.100220       1.962461       0.326032   -9999.000000       0.221400   -9999.000000       0.521000
57481     57481     hubei          113.5697       30.9697          116       174     2012      12        02        337              0.274583       6.482025       0.000000       0.330719   -9999.000000       0.263500       0.121500   -9999.000000
57481     57481     hubei          113.5697       30.9697          116       174     2012      12        03        338              0.280917       5.731506       0.000000       0.328009       0.189000   -9999.000000       0.126200   -9999.000000
57481     57481     hubei          113.5697       30.9697          116       174     2012      12        04        339              0.280000       7.367310       0.000000       0.326301       0.202000       0.334700       0.128200       0.228000
57481     57481     hubei          113.5697       30.9697          116       174     2012      12        05        340              0.272875       6.986389       1.690516       0.325881   -9999.000000   -9999.000000       0.163000   -9999.000000
57481     57481     hubei          113.5697       30.9697          116       174     2012      12        06        341              0.280208       8.107880       0.192692       0.323520   -9999.000000       0.364600   -9999.000000       0.202000
57481     57481     hubei          113.5697       30.9697          116       174     2012      12        07        342              0.272958       7.568573       0.159397       0.323106       0.171000       0.123500   -9999.000000   -9999.000000
57481     57481     hubei          113.5697       30.9697          116       174     2012      12        08        343              0.266083       8.338898       0.000000       0.321889       0.176000   -9999.000000       0.124900       0.278000
57481     57481     hubei          113.5697       30.9697          116       174     2012      12        09        344              0.262958       7.668365       0.727289       0.320551       0.188000       0.143900       0.135700       0.301000
57481     57481     hubei          113.5697       30.9697          116       174     2012      12        10        345              0.268583       6.549866       0.363360       0.320910   -9999.000000   -9999.000000       0.125300   -9999.000000
57481     57481     hubei          113.5697       30.9697          116       174     2012      12        11        346              0.269208       5.512054       0.000000       0.323960   -9999.000000   -9999.000000       0.126800       0.161000
57481     57481     hubei          113.5697       30.9697          116       174     2012      12        12        347              0.268625       5.809052       5.274419       0.321757       0.163500       0.321200   -9999.000000   -9999.000000
57481     57481     hubei          113.5697       30.9697          116       174     2012      12        13        348              0.289583       6.800354      21.346285       0.327420       0.195000   -9999.000000   -9999.000000       0.795000
57481     57481     hubei          113.5697       30.9697          116       174     2012      12        14        349              0.293625       6.223053       9.320996       0.373381       0.195000       0.312200       0.102600   -9999.000000
57481     57481     hubei          113.5697       30.9697          116       174     2012      12        15        350              0.000000       5.037659       0.000000       0.365126   -9999.000000   -9999.000000       0.149800   -9999.000000
57481     57481     hubei          113.5697       30.9697          116       174     2012      12        16        351              0.288542       6.307190       0.384780       0.352016   -9999.000000       0.300000       0.145100       0.494000
57481     57481     hubei          113.5697       30.9697          116       174     2012      12        17        352              0.287875       6.032867      12.578893       0.346180   -9999.000000       0.457200   -9999.000000   -9999.000000
57481     57481     hubei          113.5697       30.9697          116       174     2012      12        18        353              0.288167       4.481720       0.000000       0.363056   -9999.000000   -9999.000000   -9999.000000       0.363000
57481     57481     hubei          113.5697       30.9697          116       174     2012      12        19        354              0.281500       3.961761       0.850696       0.346082   -9999.000000       0.365900       0.156900   -9999.000000
57481     57481     hubei          113.5697       30.9697          116       174     2012      12        20        355              0.000000       4.536133       1.064815       0.343666   -9999.000000       0.268800       0.136700       0.511000
57481     57481     hubei          113.5697       30.9697          116       174     2012      12        21        356              0.283542       2.151184       0.275491       0.343377   -9999.000000   -9999.000000       0.137000       0.558000
57481     57481     hubei          113.5697       30.9697          116       174     2012      12        22        357              0.287667       3.772278       0.230381       0.341586   -9999.000000   -9999.000000       0.163100   -9999.000000
57481     57481     hubei          113.5697       30.9697          116       174     2012      12        23        358              0.278417       3.365295       0.191497       0.335064   -9999.000000   -9999.000000   -9999.000000       0.124000
57481     57481     hubei          113.5697       30.9697          116       174     2012      12        24        359              0.280105       2.465881       0.063551       0.309720   -9999.000000   -9999.000000   -9999.000000   -9999.000000
57481     57481     hubei          113.5697       30.9697          116       174     2012      12        25        360              0.279458       3.308167       0.000000       0.325275   -9999.000000       0.262500       0.123200       0.233000
57481     57481     hubei          113.5697       30.9697          116       174     2012      12        26        361              0.000000       2.132874       0.069501       0.325762   -9999.000000   -9999.000000       0.160200   -9999.000000
57481     57481     hubei          113.5697       30.9697          116       174     2012      12        27        362              0.279909       1.165131       0.642246       0.311087   -9999.000000       0.465000       0.171500   -9999.000000
57481     57481     hubei          113.5697       30.9697          116       174     2012      12        28        363              0.284000       1.603271       5.818850       0.320174   -9999.000000   -9999.000000       0.179300       0.470000
57481     57481     hubei          113.5697       30.9697          116       174     2012      12        29        364              0.000000       1.859161       2.571517       0.332493   -9999.000000       0.312200   -9999.000000   -9999.000000
57481     57481     hubei          113.5697       30.9697          116       174     2012      12        30        365              0.000000       1.025085       0.323506       0.313097   -9999.000000       0.350800   -9999.000000       0.016000
57481     57481     hubei          113.5697       30.9697          116       174     2012      12        31        366              0.281267       1.389221       0.050307       0.287859   -9999.000000   -9999.000000       0.098400   -9999.000000
