# Supplementary material for: Research on Fusing Multisatellite Soil Moisture Data Based on Bayesian Model Averaging
Source: Hindawi journal article supplement (doi:10.1155/2018/9310838), 2018-06-25
Supplement: f1 [file 9310838.f1.zip › 2012_sm00-10cm_daily_ZDB_ZHY_57482_366days_allin.txt]

57482     57482     hubei          113.5697       30.5400          118       174     2012      01        01        001              0.000000   -9999.000000       0.000000   -9999.000000       0.114000   -9999.000000       0.114700   -9999.000000
57482     57482     hubei          113.5697       30.5400          118       174     2012      01        02        002              0.000000       4.077240       0.000000       0.347190   -9999.000000       0.286200       0.143300   -9999.000000
57482     57482     hubei          113.5697       30.5400          118       174     2012      01        03        003              0.000000       4.547699       0.000000       0.352664   -9999.000000       0.217600   -9999.000000       0.048000
57482     57482     hubei          113.5697       30.5400          118       174     2012      01        04        004              0.000000       2.170319       0.000000       0.324250   -9999.000000   -9999.000000   -9999.000000   -9999.000000
57482     57482     hubei          113.5697       30.5400          118       174     2012      01        05        005              0.000000       2.891113       0.000000       0.328753   -9999.000000       0.111400       0.099500       0.008000
57482     57482     hubei          113.5697       30.5400          118       174     2012      01        06        006              0.000000       1.896423       0.000000       0.323570   -9999.000000   -9999.000000       0.123200   -9999.000000
57482     57482     hubei          113.5697       30.5400          118       174     2012      01        07        007              0.000000       3.909607       0.000000       0.337797   -9999.000000   -9999.000000       0.147500       0.128000
57482     57482     hubei          113.5697       30.5400          118       174     2012      01        08        008              0.000000       2.259338       0.000000       0.340019   -9999.000000       0.118700   -9999.000000       0.022000
57482     57482     hubei          113.5697       30.5400          118       174     2012      01        09        009              0.000000       2.943787       0.000000       0.344706   -9999.000000   -9999.000000   -9999.000000   -9999.000000
57482     57482     hubei          113.5697       30.5400          118       174     2012      01        10        010              0.000000       4.760101       0.000000       0.347256   -9999.000000       0.116300       0.074100       0.032000
57482     57482     hubei          113.5697       30.5400          118       174     2012      01        11        011              0.000000       4.580841       0.000000       0.347036   -9999.000000   -9999.000000       0.083100   -9999.000000
57482     57482     hubei          113.5697       30.5400          118       174     2012      01        12        012              0.000000       3.061798       0.229777       0.345508   -9999.000000       0.285100       0.097500       0.138000
57482     57482     hubei          113.5697       30.5400          118       174     2012      01        13        013              0.000000       3.136932       7.356351       0.347031   -9999.000000       0.098400       0.107100   -9999.000000
57482     57482     hubei          113.5697       30.5400          118       174     2012      01        14        014              0.000000       3.234009       2.381605       0.355093   -9999.000000   -9999.000000   -9999.000000   -9999.000000
57482     57482     hubei          113.5697       30.5400          118       174     2012      01        15        015              0.000000       2.478363       0.183267       0.362604   -9999.000000       0.091600   -9999.000000       0.710000
57482     57482     hubei          113.5697       30.5400          118       174     2012      01        16        016              0.186682       3.008698       0.239643       0.356035   -9999.000000       0.132500       0.050100   -9999.000000
57482     57482     hubei          113.5697       30.5400          118       174     2012      01        17        017              0.000000       4.157104       2.268067       0.353335   -9999.000000   -9999.000000       0.081200       0.920000
57482     57482     hubei          113.5697       30.5400          118       174     2012      01        18        018              0.188500       3.858063       1.291950       0.356330   -9999.000000       0.228200       0.095500   -9999.000000
57482     57482     hubei          113.5697       30.5400          118       174     2012      01        19        019              0.188435       4.507111       0.823317       0.356224   -9999.000000   -9999.000000       0.089500   -9999.000000
57482     57482     hubei          113.5697       30.5400          118       174     2012      01        20        020              0.189500       4.142365       6.415316       0.353525   -9999.000000       0.235700   -9999.000000       0.970000
57482     57482     hubei          113.5697       30.5400          118       174     2012      01        21        021              0.202053       3.544159       0.130795       0.363859   -9999.000000       0.297600   -9999.000000   -9999.000000
57482     57482     hubei          113.5697       30.5400          118       174     2012      01        22        022              0.205947       1.386047       2.842109       0.319273   -9999.000000   -9999.000000       0.039300       0.104000
57482     57482     hubei          113.5697       30.5400          118       174     2012      01        23        023              0.203059       0.422699       0.579375       0.282007   -9999.000000       0.125700       0.100300   -9999.000000
57482     57482     hubei          113.5697       30.5400          118       174     2012      01        24        024              0.201571       1.121368       0.000000       0.296851   -9999.000000   -9999.000000   -9999.000000       0.041000
57482     57482     hubei          113.5697       30.5400          118       174     2012      01        25        025              0.199318       2.517151       0.000000       0.314712   -9999.000000       0.190000   -9999.000000       0.191000
57482     57482     hubei          113.5697       30.5400          118       174     2012      01        26        026              0.197682       3.049133       0.000000       0.321664   -9999.000000       0.098100   -9999.000000   -9999.000000
57482     57482     hubei          113.5697       30.5400          118       174     2012      01        27        027              0.195875       4.467590       0.000000       0.342966   -9999.000000   -9999.000000       0.091700       0.266000
57482     57482     hubei          113.5697       30.5400          118       174     2012      01        28        028              0.195545       3.238647       3.448684       0.347123       0.125000       0.185100       0.096700   -9999.000000
57482     57482     hubei          113.5697       30.5400          118       174     2012      01        29        029              0.194364       5.264771       0.337278       0.347289   -9999.000000   -9999.000000       0.116000       0.306000
57482     57482     hubei          113.5697       30.5400          118       174     2012      01        30        030              0.194545       4.237122       0.000000       0.348938   -9999.000000       0.187800       0.153100   -9999.000000
57482     57482     hubei          113.5697       30.5400          118       174     2012      01        31        031              0.194417       4.486816       0.000000       0.345772   -9999.000000       0.220800   -9999.000000   -9999.000000
57482     57482     hubei          113.5697       30.5400          118       174     2012      02        01        032              0.193500       5.734772       0.000000       0.346693   -9999.000000   -9999.000000   -9999.000000       0.068000
57482     57482     hubei          113.5697       30.5400          118       174     2012      02        02        033              0.192333       4.134644       0.000000       0.344291   -9999.000000       0.101100       0.057300   -9999.000000
57482     57482     hubei          113.5697       30.5400          118       174     2012      02        03        034              0.192050       2.828308       0.000000       0.329099       0.132000       0.229300       0.135800   -9999.000000
57482     57482     hubei          113.5697       30.5400          118       174     2012      02        04        035              0.191000       4.773834       0.000000       0.340815   -9999.000000       0.248700       0.135700   -9999.000000
57482     57482     hubei          113.5697       30.5400          118       174     2012      02        05        036              0.191000       3.377960       4.981420       0.344995   -9999.000000       0.226000       0.188100       0.800000
57482     57482     hubei          113.5697       30.5400          118       174     2012      02        06        037              0.192333       3.866425       0.160187       0.356237   -9999.000000   -9999.000000   -9999.000000       0.389000
57482     57482     hubei          113.5697       30.5400          118       174     2012      02        07        038              0.192458       4.912354       0.000000       0.352951   -9999.000000       0.182800   -9999.000000   -9999.000000
57482     57482     hubei          113.5697       30.5400          118       174     2012      02        08        039              0.192043       3.924713       0.000000       0.340043   -9999.000000       0.168800       0.115400       0.029000
57482     57482     hubei          113.5697       30.5400          118       174     2012      02        09        040              0.190667       4.458282       0.000000       0.343146   -9999.000000   -9999.000000       0.141600   -9999.000000
57482     57482     hubei          113.5697       30.5400          118       174     2012      02        10        041              0.190947       2.345734       0.000000       0.334673   -9999.000000       0.152100       0.147500       0.060000
57482     57482     hubei          113.5697       30.5400          118       174     2012      02        11        042              0.191368       4.585327       0.073866       0.337065   -9999.000000   -9999.000000   -9999.000000   -9999.000000
57482     57482     hubei          113.5697       30.5400          118       174     2012      02        12        043              0.190800       6.481506       0.949573       0.343031   -9999.000000       0.317700   -9999.000000   -9999.000000
57482     57482     hubei          113.5697       30.5400          118       174     2012      02        13        044              0.190000       5.273651       0.854384       0.346675   -9999.000000       0.174800   -9999.000000       0.191000
57482     57482     hubei          113.5697       30.5400          118       174     2012      02        14        045              0.190000       4.449036       3.443834       0.347573       0.173000   -9999.000000       0.172600   -9999.000000
57482     57482     hubei          113.5697       30.5400          118       174     2012      02        15        046              0.190000       4.049530       0.446163       0.353873   -9999.000000       0.109700       0.171900       0.521000
57482     57482     hubei          113.5697       30.5400          118       174     2012      02        16        047              0.191583       4.014008       0.000000       0.352316   -9999.000000   -9999.000000       0.188200   -9999.000000
57482     57482     hubei          113.5697       30.5400          118       174     2012      02        17        048              0.191864       6.084198       0.000000       0.348978   -9999.000000       0.223800   -9999.000000   -9999.000000
57482     57482     hubei          113.5697       30.5400          118       174     2012      02        18        049              0.191591       6.231415       1.370898       0.346219       0.127000       0.209500   -9999.000000       0.048000
57482     57482     hubei          113.5697       30.5400          118       174     2012      02        19        050              0.191417       6.461639       0.000000       0.344304       0.133000   -9999.000000       0.084600   -9999.000000
57482     57482     hubei          113.5697       30.5400          118       174     2012      02        20        051              0.190478       7.711090       0.000000       0.342812       0.171000       0.417900       0.105000       0.049000
57482     57482     hubei          113.5697       30.5400          118       174     2012      02        21        052              0.190792       6.660645       0.880377       0.344126   -9999.000000   -9999.000000   -9999.000000   -9999.000000
57482     57482     hubei          113.5697       30.5400          118       174     2012      02        22        053              0.217125       7.575348       5.954614       0.346375   -9999.000000       0.362600       0.144100       0.429000
57482     57482     hubei          113.5697       30.5400          118       174     2012      02        23        054              0.212476       8.382935       0.224221       0.360260       0.175000       0.177100   -9999.000000       0.423000
57482     57482     hubei          113.5697       30.5400          118       174     2012      02        24        055              0.209400       6.718872       0.000000       0.352088   -9999.000000   -9999.000000   -9999.000000   -9999.000000
57482     57482     hubei          113.5697       30.5400          118       174     2012      02        25        056              0.206250       4.727264       0.823028       0.349484   -9999.000000       0.456200       0.098600       0.359000
57482     57482     hubei          113.5697       30.5400          118       174     2012      02        26        057              0.203545       4.166901       0.000000       0.349317   -9999.000000       0.173700       0.117500   -9999.000000
57482     57482     hubei          113.5697       30.5400          118       174     2012      02        27        058              0.200842       6.171539       0.000000       0.346036   -9999.000000   -9999.000000   -9999.000000       0.106000
57482     57482     hubei          113.5697       30.5400          118       174     2012      02        28        059              0.199542       5.711761       0.000000       0.345057       0.113000       0.215500   -9999.000000   -9999.000000
57482     57482     hubei          113.5697       30.5400          118       174     2012      02        29        060              0.000000   -9999.000000       0.000000   -9999.000000       0.128000   -9999.000000   -9999.000000   -9999.000000
57482     57482     hubei          113.5697       30.5400          118       174     2012      03        01        061              0.196478       7.406708       0.862412       0.343585       0.172000       0.176300       0.095700       0.016000
57482     57482     hubei          113.5697       30.5400          118       174     2012      03        02        062              0.196000       7.484314       8.952737       0.343575   -9999.000000       0.227200       0.124200   -9999.000000
57482     57482     hubei          113.5697       30.5400          118       174     2012      03        03        063              0.000000       7.021332       4.223960       0.352786   -9999.000000   -9999.000000       0.140400       0.488000
57482     57482     hubei          113.5697       30.5400          118       174     2012      03        04        064              0.000000       5.957123       0.580761       0.362890   -9999.000000       0.193300       0.144400   -9999.000000
57482     57482     hubei          113.5697       30.5400          118       174     2012      03        05        065              0.000000       4.351410       0.000000       0.358107       0.167000   -9999.000000   -9999.000000       0.139000
57482     57482     hubei          113.5697       30.5400          118       174     2012      03        06        066              0.208000       7.548676       1.904571       0.351628       0.186000       0.288900   -9999.000000       0.134000
57482     57482     hubei          113.5697       30.5400          118       174     2012      03        07        067              0.000000       7.029022       6.778574       0.352509   -9999.000000       0.316500       0.124300   -9999.000000
57482     57482     hubei          113.5697       30.5400          118       174     2012      03        08        068              0.220000       6.638153       3.859097       0.363561   -9999.000000   -9999.000000       0.170200       0.551000
57482     57482     hubei          113.5697       30.5400          118       174     2012      03        09        069              0.000000       5.623535       0.110830       0.363844   -9999.000000       0.424500       0.186000   -9999.000000
57482     57482     hubei          113.5697       30.5400          118       174     2012      03        10        070              0.000000       6.753052       0.000000       0.354758       0.151000   -9999.000000   -9999.000000       0.106000
57482     57482     hubei          113.5697       30.5400          118       174     2012      03        11        071              0.000000       9.592377       5.768086       0.349722       0.146000       0.399100   -9999.000000   -9999.000000
57482     57482     hubei          113.5697       30.5400          118       174     2012      03        12        072              0.210500       8.018799       0.000000       0.347721       0.185000       0.266900       0.126600   -9999.000000
57482     57482     hubei          113.5697       30.5400          118       174     2012      03        13        073              0.210000      10.073425       0.571910       0.345286   -9999.000000   -9999.000000       0.117600       0.080000
57482     57482     hubei          113.5697       30.5400          118       174     2012      03        14        074              0.209000      12.542358       4.667099       0.343260       0.184000       0.206600       0.155200   -9999.000000
57482     57482     hubei          113.5697       30.5400          118       174     2012      03        15        075              0.233000      14.302124       2.503713       0.346201       0.179000       0.382300       0.185600       0.416000
57482     57482     hubei          113.5697       30.5400          118       174     2012      03        16        076              0.220000      11.223846       0.202871       0.357715       0.161000       0.024700   -9999.000000   -9999.000000
57482     57482     hubei          113.5697       30.5400          118       174     2012      03        17        077              0.224500      10.092682       1.508048       0.351104       0.176000       0.334000   -9999.000000   -9999.000000
57482     57482     hubei          113.5697       30.5400          118       174     2012      03        18        078              0.222857      10.802612       1.163690       0.352507   -9999.000000   -9999.000000       0.127800       0.001000
57482     57482     hubei          113.5697       30.5400          118       174     2012      03        19        079              0.219857      14.122833       0.982289       0.348953       0.234000       0.142000       0.241600   -9999.000000
57482     57482     hubei          113.5697       30.5400          118       174     2012      03        20        080              0.219391       7.572723       0.559998       0.349450       0.227000       0.189300       0.220600       0.150000
57482     57482     hubei          113.5697       30.5400          118       174     2012      03        21        081              0.223333       7.742950       9.930264       0.349683       0.242500   -9999.000000       0.248700   -9999.000000
57482     57482     hubei          113.5697       30.5400          118       174     2012      03        22        082              0.249083       9.625854      36.907974       0.359162   -9999.000000       0.202400   -9999.000000       0.486000
57482     57482     hubei          113.5697       30.5400          118       174     2012      03        23        083              0.236792       7.390961       1.486396       0.398621   -9999.000000   -9999.000000   -9999.000000       0.102000
57482     57482     hubei          113.5697       30.5400          118       174     2012      03        24        084              0.231250      11.928650       0.453375       0.371823   -9999.000000   -9999.000000   -9999.000000   -9999.000000
57482     57482     hubei          113.5697       30.5400          118       174     2012      03        25        085              0.000000      14.317139       0.277136       0.359152       0.156000       0.306900       0.204400       0.163000
57482     57482     hubei          113.5697       30.5400          118       174     2012      03        26        086              0.226125      16.394196       0.727147       0.352826       0.162000   -9999.000000       0.332100   -9999.000000
57482     57482     hubei          113.5697       30.5400          118       174     2012      03        27        087              0.223083      18.110474       0.288090       0.348522       0.199000       0.367800   -9999.000000       0.006000
57482     57482     hubei          113.5697       30.5400          118       174     2012      03        28        088              0.220500      19.401672       0.415862       0.346093   -9999.000000   -9999.000000   -9999.000000   -9999.000000
57482     57482     hubei          113.5697       30.5400          118       174     2012      03        29        089              0.229208      19.190338      18.275970       0.346382   -9999.000000       0.266800       0.291000   -9999.000000
57482     57482     hubei          113.5697       30.5400          118       174     2012      03        30        090              0.240417      17.835144       1.071373       0.367964   -9999.000000       0.262500       0.279500       0.283000
57482     57482     hubei          113.5697       30.5400          118       174     2012      03        31        091              0.234083      15.598053       0.000000       0.368828       0.137000   -9999.000000       0.268500   -9999.000000
57482     57482     hubei          113.5697       30.5400          118       174     2012      04        01        092              0.231125      17.047943       0.083287       0.354280       0.183000       0.256400       0.312900       0.029000
57482     57482     hubei          113.5697       30.5400          118       174     2012      04        02        093              0.227917      18.603821       0.000000       0.348757       0.217000       0.280800   -9999.000000   -9999.000000
57482     57482     hubei          113.5697       30.5400          118       174     2012      04        03        094              0.223708      18.780151       0.331107       0.344291   -9999.000000   -9999.000000   -9999.000000       0.213000
57482     57482     hubei          113.5697       30.5400          118       174     2012      04        04        095              0.220208      16.301910       9.138040       0.344953   -9999.000000       0.334100       0.161200       0.217000
57482     57482     hubei          113.5697       30.5400          118       174     2012      04        05        096              0.221625      12.946533       0.335494       0.366165       0.176000   -9999.000000       0.207600   -9999.000000
57482     57482     hubei          113.5697       30.5400          118       174     2012      04        06        097              0.221583      15.235260       0.017662       0.355468       0.218500       0.312400       0.196600       0.127000
57482     57482     hubei          113.5697       30.5400          118       174     2012      04        07        098              0.220250      19.690216       0.168621       0.349670       0.197000       0.211100       0.197100   -9999.000000
57482     57482     hubei          113.5697       30.5400          118       174     2012      04        08        099              0.217583      20.718903       0.161032       0.345669   -9999.000000   -9999.000000   -9999.000000       0.134000
57482     57482     hubei          113.5697       30.5400          118       174     2012      04        09        100              0.215583      19.462158       5.025895       0.345336       0.252000       0.238400   -9999.000000   -9999.000000
57482     57482     hubei          113.5697       30.5400          118       174     2012      04        10        101              0.218875      17.525208       9.159793       0.358471       0.307000   -9999.000000       0.113100   -9999.000000
57482     57482     hubei          113.5697       30.5400          118       174     2012      04        11        102              0.221875      18.546570       0.455465       0.367239       0.236500       0.282500       0.141800       0.207000
57482     57482     hubei          113.5697       30.5400          118       174     2012      04        12        103              0.230500      20.326782      12.052238       0.356810   -9999.000000   -9999.000000       0.160100   -9999.000000
57482     57482     hubei          113.5697       30.5400          118       174     2012      04        13        104              0.229833      15.172272       0.083375       0.372874   -9999.000000   -9999.000000   -9999.000000       0.334000
57482     57482     hubei          113.5697       30.5400          118       174     2012      04        14        105              0.227375      16.374847       0.104789       0.359523   -9999.000000       0.156400   -9999.000000   -9999.000000
57482     57482     hubei          113.5697       30.5400          118       174     2012      04        15        106              0.226208      14.685089       0.233650       0.356535       0.200000   -9999.000000       0.137200   -9999.000000
57482     57482     hubei          113.5697       30.5400          118       174     2012      04        16        107              0.225542      15.825317       0.090913       0.353858       0.231000       0.230400       0.262800       0.177000
57482     57482     hubei          113.5697       30.5400          118       174     2012      04        17        108              0.223125      19.737274       0.306451       0.349987       0.250000       0.203800       0.268200   -9999.000000
57482     57482     hubei          113.5697       30.5400          118       174     2012      04        18        109              0.220417      19.516388       0.000000       0.349740       0.244000   -9999.000000   -9999.000000       0.160000
57482     57482     hubei          113.5697       30.5400          118       174     2012      04        19        110              0.218375      21.056824       0.000000       0.346760   -9999.000000       0.130000   -9999.000000   -9999.000000
57482     57482     hubei          113.5697       30.5400          118       174     2012      04        20        111              0.215250      22.709595       0.934298       0.343315   -9999.000000       0.081100   -9999.000000       0.318000
57482     57482     hubei          113.5697       30.5400          118       174     2012      04        21        112              0.215292      17.925751       4.587971       0.347712       0.173000       0.088600       0.205000       0.215000
57482     57482     hubei          113.5697       30.5400          118       174     2012      04        22        113              0.213750      21.024628       4.581689       0.342680       0.229000       0.411800       0.257400   -9999.000000
57482     57482     hubei          113.5697       30.5400          118       174     2012      04        23        114              0.210667      23.312042       5.243800       0.346900       0.230000   -9999.000000       0.346400       0.448000
57482     57482     hubei          113.5697       30.5400          118       174     2012      04        24        115              0.222583      23.405914      26.282522       0.356305   -9999.000000       0.284300       0.428000   -9999.000000
57482     57482     hubei          113.5697       30.5400          118       174     2012      04        25        116              0.000000      20.374847       0.574121       0.387541   -9999.000000       0.200400   -9999.000000       0.436000
57482     57482     hubei          113.5697       30.5400          118       174     2012      04        26        117              0.218708      19.703857       0.257993       0.363241       0.190000   -9999.000000   -9999.000000   -9999.000000
57482     57482     hubei          113.5697       30.5400          118       174     2012      04        27        118              0.215000      21.570068       0.536632       0.352421       0.249500       0.422600   -9999.000000   -9999.000000
57482     57482     hubei          113.5697       30.5400          118       174     2012      04        28        119              0.212458      23.461884       9.992872       0.346689       0.229000   -9999.000000       0.356600       0.464000
57482     57482     hubei          113.5697       30.5400          118       174     2012      04        29        120              0.212417      23.297028       0.515405       0.363457   -9999.000000       0.316500       0.396200   -9999.000000
57482     57482     hubei          113.5697       30.5400          118       174     2012      04        30        121              0.229333      22.711609      17.486427       0.356503       0.361000       0.189400   -9999.000000       0.841000
57482     57482     hubei          113.5697       30.5400          118       174     2012      05        01        122              0.230042      21.268463       0.229903       0.379865       0.276000   -9999.000000   -9999.000000   -9999.000000
57482     57482     hubei          113.5697       30.5400          118       174     2012      05        02        123              0.227250      21.523926       6.341827       0.361825       0.251500       0.282100       0.211900       0.469000
57482     57482     hubei          113.5697       30.5400          118       174     2012      05        03        124              0.226542      22.834686       1.651065       0.361980       0.240000   -9999.000000       0.235200       0.533000
57482     57482     hubei          113.5697       30.5400          118       174     2012      05        04        125              0.227292      21.537018       0.150884       0.364670   -9999.000000   -9999.000000       0.258500   -9999.000000
57482     57482     hubei          113.5697       30.5400          118       174     2012      05        05        126              0.227958      23.583252       0.000000       0.356866       0.256000   -9999.000000       0.222300       0.495000
57482     57482     hubei          113.5697       30.5400          118       174     2012      05        06        127              0.225542      26.200104       0.000000       0.350801       0.225500   -9999.000000   -9999.000000   -9999.000000
57482     57482     hubei          113.5697       30.5400          118       174     2012      05        07        128              0.229458      27.323547       5.722481       0.347053   -9999.000000       0.282400   -9999.000000       0.832000
57482     57482     hubei          113.5697       30.5400          118       174     2012      05        08        129              0.230625      27.066711       0.592552       0.355153       0.260500       0.326600       0.212900   -9999.000000
57482     57482     hubei          113.5697       30.5400          118       174     2012      05        09        130              0.226667      26.952179       4.984174       0.350605       0.325000       0.247100       0.285600   -9999.000000
57482     57482     hubei          113.5697       30.5400          118       174     2012      05        10        131              0.224208      22.824341       0.000000       0.359708   -9999.000000       0.270700       0.266600       0.451000
57482     57482     hubei          113.5697       30.5400          118       174     2012      05        11        132              0.220125      26.661835       1.339157       0.347931       0.311000   -9999.000000       0.282700   -9999.000000
57482     57482     hubei          113.5697       30.5400          118       174     2012      05        12        133              0.216292      27.547882       7.343179       0.345650       0.323000       0.190000   -9999.000000       0.788000
57482     57482     hubei          113.5697       30.5400          118       174     2012      05        13        134              0.226417      21.453979      23.136944       0.359532       0.236000       0.468500   -9999.000000   -9999.000000
57482     57482     hubei          113.5697       30.5400          118       174     2012      05        14        135              0.247583      23.226349       7.402853       0.372607   -9999.000000   -9999.000000       0.259600   -9999.000000
57482     57482     hubei          113.5697       30.5400          118       174     2012      05        15        136              0.238250      20.043579       0.195678       0.380207   -9999.000000       0.257400       0.267300       0.600000
57482     57482     hubei          113.5697       30.5400          118       174     2012      05        16        137              0.235917      21.355530       0.075576       0.363152   -9999.000000   -9999.000000       0.320500   -9999.000000
57482     57482     hubei          113.5697       30.5400          118       174     2012      05        17        138              0.232208      24.368896       0.076715       0.354408       0.260500       0.549200   -9999.000000       0.283000
57482     57482     hubei          113.5697       30.5400          118       174     2012      05        18        139              0.229333      26.660675      21.217129       0.348911       0.234000       0.381000   -9999.000000   -9999.000000
57482     57482     hubei          113.5697       30.5400          118       174     2012      05        19        140              0.235750      24.084534       0.684133       0.368387       0.258000   -9999.000000       0.264300       0.350000
57482     57482     hubei          113.5697       30.5400          118       174     2012      05        20        141              0.231417      24.999237       0.194182       0.366665   -9999.000000       0.672100       0.277100       0.475000
57482     57482     hubei          113.5697       30.5400          118       174     2012      05        21        142              0.227000      24.345551       0.000000       0.355297       0.338000   -9999.000000       0.253400   -9999.000000
57482     57482     hubei          113.5697       30.5400          118       174     2012      05        22        143              0.222958      24.608154       7.750812       0.351840       0.271000       0.435200       0.236300       0.785000
57482     57482     hubei          113.5697       30.5400          118       174     2012      05        23        144              0.231667      23.040985      10.245734       0.363416   -9999.000000       0.304700   -9999.000000   -9999.000000
57482     57482     hubei          113.5697       30.5400          118       174     2012      05        24        145              0.235708      22.533081       1.205391       0.371943       0.370000   -9999.000000   -9999.000000       0.662000
57482     57482     hubei          113.5697       30.5400          118       174     2012      05        25        146              0.000000      21.623596       3.501635       0.366001   -9999.000000       0.264900       0.250200   -9999.000000
57482     57482     hubei          113.5697       30.5400          118       174     2012      05        26        147              0.233458      22.547150       0.000000       0.364027   -9999.000000       0.306700       0.248700   -9999.000000
57482     57482     hubei          113.5697       30.5400          118       174     2012      05        27        148              0.230208      24.757660       0.139763       0.355567       0.311000       0.428600       0.279100       0.285000
57482     57482     hubei          113.5697       30.5400          118       174     2012      05        28        149              0.226333      26.398529      26.020344       0.351862       0.262000       0.477100       0.240700   -9999.000000
57482     57482     hubei          113.5697       30.5400          118       174     2012      05        29        150              0.304792      27.664764      55.926384       0.364633       0.410000   -9999.000000   -9999.000000       1.000000
57482     57482     hubei          113.5697       30.5400          118       174     2012      05        30        151              0.261583      21.898407       0.000000       0.411500   -9999.000000   -9999.000000       0.290700   -9999.000000
57482     57482     hubei          113.5697       30.5400          118       174     2012      05        31        152              0.256708      25.266907       0.236290       0.384159   -9999.000000       0.484700   -9999.000000   -9999.000000
57482     57482     hubei          113.5697       30.5400          118       174     2012      06        01        153              0.252333      25.542084       2.207477       0.377173   -9999.000000       0.399200       0.359300       0.617000
57482     57482     hubei          113.5697       30.5400          118       174     2012      06        02        154              0.251250      22.679138       1.035470       0.378111   -9999.000000       0.287500       0.321400   -9999.000000
57482     57482     hubei          113.5697       30.5400          118       174     2012      06        03        155              0.247042      25.468597       3.040986       0.370229       0.446000   -9999.000000   -9999.000000       0.448000
57482     57482     hubei          113.5697       30.5400          118       174     2012      06        04        156              0.244250      24.710571       0.061195       0.370817       0.440000       0.447400   -9999.000000   -9999.000000
57482     57482     hubei          113.5697       30.5400          118       174     2012      06        05        157              0.241875      25.198425       6.959238       0.366675   -9999.000000       0.548200       0.288300       0.426000
57482     57482     hubei          113.5697       30.5400          118       174     2012      06        06        158              0.246792      26.656097       2.302769       0.367734   -9999.000000   -9999.000000       0.285200   -9999.000000
57482     57482     hubei          113.5697       30.5400          118       174     2012      06        07        159              0.248333      25.806152       0.000000       0.373144       0.347000       0.293300       0.255900   -9999.000000
57482     57482     hubei          113.5697       30.5400          118       174     2012      06        08        160              0.245667      27.806915       0.100249       0.362724       0.389000   -9999.000000       0.292300       0.444000
57482     57482     hubei          113.5697       30.5400          118       174     2012      06        09        161              0.241583      28.805756       0.089356       0.359030       0.347000       0.570800   -9999.000000   -9999.000000
57482     57482     hubei          113.5697       30.5400          118       174     2012      06        10        162              0.235917      30.437988       0.415287       0.355455   -9999.000000       0.493200   -9999.000000       0.578000
57482     57482     hubei          113.5697       30.5400          118       174     2012      06        11        163              0.000000      27.590485       0.000000       0.356793   -9999.000000   -9999.000000       0.208500   -9999.000000
57482     57482     hubei          113.5697       30.5400          118       174     2012      06        12        164              0.228375      27.918304       0.000000       0.352940       0.303000       0.392700       0.247100   -9999.000000
57482     57482     hubei          113.5697       30.5400          118       174     2012      06        13        165              0.224583      29.148865       0.586922       0.347073       0.383500       0.454400       0.309400       0.540000
57482     57482     hubei          113.5697       30.5400          118       174     2012      06        14        166              0.221375      29.661133       1.484873       0.342894       0.413000       0.534600   -9999.000000   -9999.000000
57482     57482     hubei          113.5697       30.5400          118       174     2012      06        15        167              0.218417      29.209839       0.000000       0.343028   -9999.000000       0.673600   -9999.000000       0.451000
57482     57482     hubei          113.5697       30.5400          118       174     2012      06        16        168              0.216250      28.691132       0.000000       0.336773   -9999.000000   -9999.000000       0.222900   -9999.000000
57482     57482     hubei          113.5697       30.5400          118       174     2012      06        17        169              0.213458      29.178619       0.000000       0.333441       0.409000       0.448200       0.209000       0.082000
57482     57482     hubei          113.5697       30.5400          118       174     2012      06        18        170              0.211667      28.747803       0.077605       0.330491       0.343500       0.437000       0.220800       0.639000
57482     57482     hubei          113.5697       30.5400          118       174     2012      06        19        171              0.209167      29.740875       1.894598       0.329015       0.343500   -9999.000000       0.267100   -9999.000000
57482     57482     hubei          113.5697       30.5400          118       174     2012      06        20        172              0.206708      29.824738       0.000000       0.324904       0.329000       0.191200   -9999.000000       0.426000
57482     57482     hubei          113.5697       30.5400          118       174     2012      06        21        173              0.204375      30.604950       3.122188       0.323577   -9999.000000   -9999.000000   -9999.000000   -9999.000000
57482     57482     hubei          113.5697       30.5400          118       174     2012      06        22        174              0.201625      30.859070       0.864952       0.322029       0.415000       0.349300       0.176900       0.242000
57482     57482     hubei          113.5697       30.5400          118       174     2012      06        23        175              0.198500      30.346863       1.092664       0.321831       0.356500       0.439600       0.183300   -9999.000000
57482     57482     hubei          113.5697       30.5400          118       174     2012      06        24        176              0.195417      30.639069       0.000000       0.319080       0.357000   -9999.000000       0.214000   -9999.000000
57482     57482     hubei          113.5697       30.5400          118       174     2012      06        25        177              0.191958      30.895172      14.147197       0.315645       0.318000       0.424100       0.137800       0.181000
57482     57482     hubei          113.5697       30.5400          118       174     2012      06        26        178              0.196375      29.996918      69.826073       0.333321   -9999.000000   -9999.000000   -9999.000000   -9999.000000
57482     57482     hubei          113.5697       30.5400          118       174     2012      06        27        179              0.349542      27.197327      43.991283       0.408808       0.490000       0.515900   -9999.000000       1.000000
57482     57482     hubei          113.5697       30.5400          118       174     2012      06        28        180              0.340833      26.314575      23.798950       0.409710       0.494000       0.740100       0.119300   -9999.000000
57482     57482     hubei          113.5697       30.5400          118       174     2012      06        29        181              0.323792      26.998993       0.562866       0.399391       0.430000   -9999.000000       0.139800       1.000000
57482     57482     hubei          113.5697       30.5400          118       174     2012      06        30        182              0.313667      30.428528       0.159271       0.380345       0.393000       0.454200       0.158900   -9999.000000
57482     57482     hubei          113.5697       30.5400          118       174     2012      07        01        183              0.306591      28.867706       0.000000       0.374407   -9999.000000       0.605700   -9999.000000   -9999.000000
57482     57482     hubei          113.5697       30.5400          118       174     2012      07        02        184              0.302167      29.110474       0.000000       0.370768       0.376000   -9999.000000   -9999.000000       0.501000
57482     57482     hubei          113.5697       30.5400          118       174     2012      07        03        185              0.294542      30.727142       0.000000       0.363473       0.352000       0.526200       0.219100   -9999.000000
57482     57482     hubei          113.5697       30.5400          118       174     2012      07        04        186              0.285625      31.050995       0.000000       0.359169       0.377500   -9999.000000       0.198600       0.465000
57482     57482     hubei          113.5697       30.5400          118       174     2012      07        05        187              0.278125      30.651733       0.660912       0.356389       0.335000       0.333200       0.207400   -9999.000000
57482     57482     hubei          113.5697       30.5400          118       174     2012      07        06        188              0.274250      29.528046       4.079176       0.356166   -9999.000000       0.374400       0.205800   -9999.000000
57482     57482     hubei          113.5697       30.5400          118       174     2012      07        07        189              0.269958      31.765533       0.000000       0.352107   -9999.000000   -9999.000000   -9999.000000       0.341000
57482     57482     hubei          113.5697       30.5400          118       174     2012      07        08        190              0.265458      31.355499       0.000000       0.347951       0.394000       0.146900   -9999.000000   -9999.000000
57482     57482     hubei          113.5697       30.5400          118       174     2012      07        09        191              0.260667      31.531921       0.000000       0.343113       0.349500   -9999.000000       0.084600       0.208000
57482     57482     hubei          113.5697       30.5400          118       174     2012      07        10        192              0.257000      30.953491       0.057768       0.339496       0.350500       0.326000       0.118700   -9999.000000
57482     57482     hubei          113.5697       30.5400          118       174     2012      07        11        193              0.255292      31.486328       0.113933       0.337219       0.414000       0.517400       0.115900   -9999.000000
57482     57482     hubei          113.5697       30.5400          118       174     2012      07        12        194              0.315250      32.323181      23.684765       0.335092   -9999.000000   -9999.000000       0.136400       0.810000
57482     57482     hubei          113.5697       30.5400          118       174     2012      07        13        195              0.377826      28.724213      77.662895       0.375607       0.500000   -9999.000000   -9999.000000   -9999.000000
57482     57482     hubei          113.5697       30.5400          118       174     2012      07        14        196              0.326083      26.763885       0.462536       0.417038       0.441500   -9999.000000   -9999.000000       0.633000
57482     57482     hubei          113.5697       30.5400          118       174     2012      07        15        197              0.317083      28.884430       0.000000       0.379625       0.460000   -9999.000000       0.107900   -9999.000000
57482     57482     hubei          113.5697       30.5400          118       174     2012      07        16        198              0.309667      28.462158       0.781381       0.372884       0.432000       0.518300       0.223000       0.450000
57482     57482     hubei          113.5697       30.5400          118       174     2012      07        17        199              0.300875      29.205811       4.567362       0.369473   -9999.000000   -9999.000000       0.222100       0.489000
57482     57482     hubei          113.5697       30.5400          118       174     2012      07        18        200              0.296583      29.347473       2.330359       0.369622   -9999.000000       0.499300   -9999.000000   -9999.000000
57482     57482     hubei          113.5697       30.5400          118       174     2012      07        19        201              0.287833      29.936432       9.414589       0.364450       0.497000       0.381600   -9999.000000       0.542000
57482     57482     hubei          113.5697       30.5400          118       174     2012      07        20        202              0.279833      29.191681       1.645203       0.375501       0.494000   -9999.000000       0.186000   -9999.000000
57482     57482     hubei          113.5697       30.5400          118       174     2012      07        21        203              0.273043      30.890076       0.000000       0.366498       0.426000       0.408400       0.199800       0.201000
57482     57482     hubei          113.5697       30.5400          118       174     2012      07        22        204              0.266000      32.184509       2.339355       0.359002       0.421000   -9999.000000       0.210000   -9999.000000
57482     57482     hubei          113.5697       30.5400          118       174     2012      07        23        205              0.261542      31.575623       1.403524       0.361030   -9999.000000       0.417200       0.271000   -9999.000000
57482     57482     hubei          113.5697       30.5400          118       174     2012      07        24        206              0.256333      31.787872       0.000000       0.357667       0.450000       0.207200   -9999.000000       0.009000
57482     57482     hubei          113.5697       30.5400          118       174     2012      07        25        207              0.251542      32.140778       0.000000       0.352105       0.387000       0.201800   -9999.000000   -9999.000000
57482     57482     hubei          113.5697       30.5400          118       174     2012      07        26        208              0.247083      32.500122       0.000000       0.348209       0.406000       0.220700       0.171800       0.111000
57482     57482     hubei          113.5697       30.5400          118       174     2012      07        27        209              0.241958      32.329407       1.959059       0.344800       0.368000   -9999.000000       0.247500   -9999.000000
57482     57482     hubei          113.5697       30.5400          118       174     2012      07        28        210              0.234250      32.613159       0.079829       0.341382   -9999.000000       0.219300       0.233600       0.388000
57482     57482     hubei          113.5697       30.5400          118       174     2012      07        29        211              0.233333      32.468384       0.000000       0.338083       0.414000       0.378900       0.252100       0.134000
57482     57482     hubei          113.5697       30.5400          118       174     2012      07        30        212              0.231292      32.575928       0.000000       0.333743       0.378500   -9999.000000   -9999.000000   -9999.000000
57482     57482     hubei          113.5697       30.5400          118       174     2012      07        31        213              0.228542      32.832855       0.000000       0.330421       0.379500       0.153400   -9999.000000       0.088000
57482     57482     hubei          113.5697       30.5400          118       174     2012      08        01        214              0.225167      33.426666       2.351132       0.327981       0.388000   -9999.000000       0.258300   -9999.000000
57482     57482     hubei          113.5697       30.5400          118       174     2012      08        02        215              0.220542      31.927307       0.000000       0.325138       0.433000   -9999.000000       0.285700       0.198000
57482     57482     hubei          113.5697       30.5400          118       174     2012      08        03        216              0.216417      30.534027       1.463715       0.322477   -9999.000000       0.289100       0.338700   -9999.000000
57482     57482     hubei          113.5697       30.5400          118       174     2012      08        04        217              0.212250      30.304321      14.855923       0.322484       0.495000   -9999.000000   -9999.000000   -9999.000000
57482     57482     hubei          113.5697       30.5400          118       174     2012      08        05        218              0.214500      29.319519       0.663356       0.350429       0.445500       0.262800   -9999.000000       0.333000
57482     57482     hubei          113.5697       30.5400          118       174     2012      08        06        219              0.215375      30.819275       0.338651       0.348212       0.400000   -9999.000000       0.211800   -9999.000000
57482     57482     hubei          113.5697       30.5400          118       174     2012      08        07        220              0.265250      30.771393       1.967697       0.337882       0.398000       0.433600       0.205000       0.184000
57482     57482     hubei          113.5697       30.5400          118       174     2012      08        08        221              0.316000      30.963745       0.442594       0.332032   -9999.000000       0.227300       0.235100   -9999.000000
57482     57482     hubei          113.5697       30.5400          118       174     2012      08        09        222              0.316000      30.497864       0.041850       0.329117       0.467000   -9999.000000       0.259200   -9999.000000
57482     57482     hubei          113.5697       30.5400          118       174     2012      08        10        223              0.315667      30.487549       0.306818       0.324572       0.401000       0.380600   -9999.000000       0.199000
57482     57482     hubei          113.5697       30.5400          118       174     2012      08        11        224              0.315708      28.937592       1.410855       0.325040       0.462500       0.265700   -9999.000000   -9999.000000
57482     57482     hubei          113.5697       30.5400          118       174     2012      08        12        225              0.315833      29.932678       0.072241       0.327758       0.403000       0.283600       0.152500       0.187000
57482     57482     hubei          113.5697       30.5400          118       174     2012      08        13        226              0.315792      31.925568       1.973483       0.324112   -9999.000000       0.198300       0.330300   -9999.000000
57482     57482     hubei          113.5697       30.5400          118       174     2012      08        14        227              0.315000      29.674591       0.323892       0.322463   -9999.000000   -9999.000000       0.290200       0.232000
57482     57482     hubei          113.5697       30.5400          118       174     2012      08        15        228              0.315333      28.620758       0.000000       0.327324       0.478000       0.254600   -9999.000000       0.171000
57482     57482     hubei          113.5697       30.5400          118       174     2012      08        16        229              0.315000      30.221527       0.000000       0.321182       0.437500       0.260300   -9999.000000   -9999.000000
57482     57482     hubei          113.5697       30.5400          118       174     2012      08        17        230              0.315000      29.848114       0.476528       0.317607       0.410000   -9999.000000       0.268900       0.170000
57482     57482     hubei          113.5697       30.5400          118       174     2012      08        18        231              0.315000      31.541199       0.000000       0.315237       0.407000       0.243300       0.259900   -9999.000000
57482     57482     hubei          113.5697       30.5400          118       174     2012      08        19        232              0.315000      32.635376       0.578284       0.310554   -9999.000000   -9999.000000       0.281100       0.111000
57482     57482     hubei          113.5697       30.5400          118       174     2012      08        20        233              0.315000      32.561829      38.068874       0.306821       0.485000       0.173700       0.221300   -9999.000000
57482     57482     hubei          113.5697       30.5400          118       174     2012      08        21        234              0.315375      31.338226       2.644719       0.342482       0.460000       0.245000   -9999.000000   -9999.000000
57482     57482     hubei          113.5697       30.5400          118       174     2012      08        22        235              0.316000      25.544342       0.000000       0.373864       0.394000   -9999.000000   -9999.000000   -9999.000000
57482     57482     hubei          113.5697       30.5400          118       174     2012      08        23        236              0.316000      24.240479       0.000000       0.350248       0.431000       0.312900       0.184800   -9999.000000
57482     57482     hubei          113.5697       30.5400          118       174     2012      08        24        237              0.316000      24.672607       0.000000       0.343140   -9999.000000   -9999.000000       0.229600       0.102000
57482     57482     hubei          113.5697       30.5400          118       174     2012      08        25        238              0.000000      26.735138       0.000000       0.335792       0.463000       0.537700       0.224800   -9999.000000
57482     57482     hubei          113.5697       30.5400          118       174     2012      08        26        239              0.316000      28.494568       0.915681       0.330334       0.424500       0.226600       0.238400       0.379000
57482     57482     hubei          113.5697       30.5400          118       174     2012      08        27        240              0.316000      27.767029       0.000000       0.328291       0.452500   -9999.000000   -9999.000000       0.014000
57482     57482     hubei          113.5697       30.5400          118       174     2012      08        28        241              0.316000      27.113831       0.000000       0.326057       0.443500       0.209100   -9999.000000   -9999.000000
57482     57482     hubei          113.5697       30.5400          118       174     2012      08        29        242              0.316000      28.778381       0.097133       0.321724       0.446000       0.236200       0.154200       0.261000
57482     57482     hubei          113.5697       30.5400          118       174     2012      08        30        243              0.316000      29.983734       0.000000       0.317284   -9999.000000       0.205100       0.218400   -9999.000000
57482     57482     hubei          113.5697       30.5400          118       174     2012      08        31        244              0.316000      30.172272       0.000000       0.314089       0.462000       0.219500       0.248700       0.196000
57482     57482     hubei          113.5697       30.5400          118       174     2012      09        01        245              0.316000      30.980896       0.310746       0.310243       0.386000   -9999.000000   -9999.000000   -9999.000000
57482     57482     hubei          113.5697       30.5400          118       174     2012      09        02        246              0.316000      31.735657       2.585573       0.307002       0.372000       0.278800   -9999.000000   -9999.000000
57482     57482     hubei          113.5697       30.5400          118       174     2012      09        03        247              0.316000      26.085022       0.000000       0.315773       0.347000       0.255600       0.205300       0.249000
57482     57482     hubei          113.5697       30.5400          118       174     2012      09        04        248              0.316000      27.171600       0.000000       0.311784   -9999.000000   -9999.000000       0.199500   -9999.000000
57482     57482     hubei          113.5697       30.5400          118       174     2012      09        05        249              0.316000      26.935455       0.000000       0.306834       0.404000       0.206000       0.199800       0.166000
57482     57482     hubei          113.5697       30.5400          118       174     2012      09        06        250              0.316000      27.305817       0.000000       0.301547       0.372500   -9999.000000       0.228700   -9999.000000
57482     57482     hubei          113.5697       30.5400          118       174     2012      09        07        251              0.316000      27.873566       0.453998       0.299842       0.388500       0.344500   -9999.000000   -9999.000000
57482     57482     hubei          113.5697       30.5400          118       174     2012      09        08        252              0.315833      29.017212      42.176445       0.299500       0.367000       0.208700   -9999.000000       0.302000
57482     57482     hubei          113.5697       30.5400          118       174     2012      09        09        253              0.316000      26.013275       0.055929       0.345723   -9999.000000   -9999.000000       0.182300   -9999.000000
57482     57482     hubei          113.5697       30.5400          118       174     2012      09        10        254              0.316000      24.148926       0.117422       0.365458   -9999.000000       0.382400       0.231600       0.188000
57482     57482     hubei          113.5697       30.5400          118       174     2012      09        11        255              0.316000      26.594452       1.574026       0.349011       0.383000   -9999.000000       0.254100   -9999.000000
57482     57482     hubei          113.5697       30.5400          118       174     2012      09        12        256              0.316000      26.742310       9.235732       0.342655       0.363000       0.215500       0.255100       0.360000
57482     57482     hubei          113.5697       30.5400          118       174     2012      09        13        257              0.316000      22.773468       0.000000       0.359880       0.275000       0.230800   -9999.000000       0.409000
57482     57482     hubei          113.5697       30.5400          118       174     2012      09        14        258              0.316500      21.530975       1.722762       0.346747       0.306000   -9999.000000   -9999.000000   -9999.000000
57482     57482     hubei          113.5697       30.5400          118       174     2012      09        15        259              0.316125      22.918030       0.000000       0.336656   -9999.000000       0.375400       0.162400       0.170000
57482     57482     hubei          113.5697       30.5400          118       174     2012      09        16        260              0.316000      23.020782       0.142075       0.330324       0.387000       0.237000       0.236800   -9999.000000
57482     57482     hubei          113.5697       30.5400          118       174     2012      09        17        261              0.316000      22.952881       0.234850       0.327242       0.316000   -9999.000000       0.190000       0.141000
57482     57482     hubei          113.5697       30.5400          118       174     2012      09        18        262              0.316000      23.486511       0.000000       0.324325       0.316500       0.206000   -9999.000000   -9999.000000
57482     57482     hubei          113.5697       30.5400          118       174     2012      09        19        263              0.316000      24.373199       0.000000       0.320987       0.295000   -9999.000000   -9999.000000   -9999.000000
57482     57482     hubei          113.5697       30.5400          118       174     2012      09        20        264              0.316000      25.239075       1.172581       0.317386   -9999.000000       0.339200       0.158200       0.253000
57482     57482     hubei          113.5697       30.5400          118       174     2012      09        21        265              0.316000      26.356873       0.559822       0.316016   -9999.000000       0.307700       0.167100   -9999.000000
57482     57482     hubei          113.5697       30.5400          118       174     2012      09        22        266              0.316000      22.595001       0.494500       0.322911       0.318000   -9999.000000       0.187900       0.236000
57482     57482     hubei          113.5697       30.5400          118       174     2012      09        23        267              0.316000      25.243011       0.208197       0.317424       0.338500       0.319200       0.198900   -9999.000000
57482     57482     hubei          113.5697       30.5400          118       174     2012      09        24        268              0.316000      24.447113       0.000000       0.319014       0.345500   -9999.000000   -9999.000000       0.303000
57482     57482     hubei          113.5697       30.5400          118       174     2012      09        25        269              0.316000      25.443085       0.043954       0.314356       0.348000       0.347100   -9999.000000       0.550000
57482     57482     hubei          113.5697       30.5400          118       174     2012      09        26        270              0.315958      25.693756       0.119848       0.310638   -9999.000000       0.569300       0.149200   -9999.000000
57482     57482     hubei          113.5697       30.5400          118       174     2012      09        27        271              0.315714      24.148468       0.000000       0.311693       0.332000   -9999.000000       0.208800       0.350000
57482     57482     hubei          113.5697       30.5400          118       174     2012      09        28        272              0.315250      24.995422       0.000000       0.306479       0.311500   -9999.000000       0.220700   -9999.000000
57482     57482     hubei          113.5697       30.5400          118       174     2012      09        29        273              0.315000      21.325317       0.000000       0.299674       0.319500   -9999.000000       0.206700       0.135000
57482     57482     hubei          113.5697       30.5400          118       174     2012      09        30        274              0.315000      21.435242       0.000000       0.298671       0.310000   -9999.000000   -9999.000000   -9999.000000
57482     57482     hubei          113.5697       30.5400          118       174     2012      10        01        275              0.315000      20.197937       0.000000       0.301250   -9999.000000       0.286700   -9999.000000   -9999.000000
57482     57482     hubei          113.5697       30.5400          118       174     2012      10        02        276              0.315000      21.526245       0.000000       0.298007       0.292000   -9999.000000       0.090500       0.280000
57482     57482     hubei          113.5697       30.5400          118       174     2012      10        03        277              0.315000      22.614349       0.163215       0.296144       0.263000       0.182000       0.114400   -9999.000000
57482     57482     hubei          113.5697       30.5400          118       174     2012      10        04        278              0.315000      21.753143       0.251431       0.298620       0.279500       0.196600       0.118100       0.131000
57482     57482     hubei          113.5697       30.5400          118       174     2012      10        05        279              0.315000      22.648712       5.701194       0.298212       0.351000       0.168600   -9999.000000   -9999.000000
57482     57482     hubei          113.5697       30.5400          118       174     2012      10        06        280              0.315000      19.854614       0.426996       0.324083       0.302000       0.386500   -9999.000000   -9999.000000
57482     57482     hubei          113.5697       30.5400          118       174     2012      10        07        281              0.315000      22.381561       2.073217       0.315983   -9999.000000   -9999.000000       0.117900       0.504000
57482     57482     hubei          113.5697       30.5400          118       174     2012      10        08        282              0.315000      21.268890       0.127333       0.323150       0.328000       0.457900       0.113000   -9999.000000
57482     57482     hubei          113.5697       30.5400          118       174     2012      10        09        283              0.315000      22.098206       0.000000       0.316693       0.292000       0.270600       0.130200       0.244000
57482     57482     hubei          113.5697       30.5400          118       174     2012      10        10        284              0.315000      22.761719       0.412277       0.311554       0.293000   -9999.000000       0.122300   -9999.000000
57482     57482     hubei          113.5697       30.5400          118       174     2012      10        11        285              0.315000      22.436584       0.000000       0.306693       0.203000       0.346000   -9999.000000       0.236000
57482     57482     hubei          113.5697       30.5400          118       174     2012      10        12        286              0.315000      21.601868       0.000000       0.306060   -9999.000000   -9999.000000   -9999.000000       0.205000
57482     57482     hubei          113.5697       30.5400          118       174     2012      10        13        287              0.315000      20.210785       0.329966       0.307691       0.224000       0.261400       0.066400   -9999.000000
57482     57482     hubei          113.5697       30.5400          118       174     2012      10        14        288              0.315000      19.228943       3.662542       0.309579       0.206000       0.203200       0.129400       0.094000
57482     57482     hubei          113.5697       30.5400          118       174     2012      10        15        289              0.315000      20.681702       6.322481       0.315142       0.263500   -9999.000000       0.160200   -9999.000000
57482     57482     hubei          113.5697       30.5400          118       174     2012      10        16        290              0.315000      19.560028      16.268845       0.340535       0.258000       0.350400       0.163900       0.981000
57482     57482     hubei          113.5697       30.5400          118       174     2012      10        17        291              0.315000      17.631531       0.994631       0.367263   -9999.000000   -9999.000000   -9999.000000   -9999.000000
57482     57482     hubei          113.5697       30.5400          118       174     2012      10        18        292              0.315000      17.952301       0.000000       0.341606       0.210000       0.400100       0.130200   -9999.000000
57482     57482     hubei          113.5697       30.5400          118       174     2012      10        19        293              0.315000      19.182922       0.000000       0.334325       0.224500       0.287200       0.118700       0.280000
57482     57482     hubei          113.5697       30.5400          118       174     2012      10        20        294              0.315000      20.441254       0.161469       0.331043       0.225500   -9999.000000       0.128400   -9999.000000
57482     57482     hubei          113.5697       30.5400          118       174     2012      10        21        295              0.315000      22.765259      18.272825       0.328182       0.269000       0.233800       0.145200       0.354000
57482     57482     hubei          113.5697       30.5400          118       174     2012      10        22        296              0.315000      22.902618       0.000000       0.351298   -9999.000000       0.511000   -9999.000000   -9999.000000
57482     57482     hubei          113.5697       30.5400          118       174     2012      10        23        297              0.315000      16.648376       0.311091       0.351318   -9999.000000       0.368100   -9999.000000       0.372000
57482     57482     hubei          113.5697       30.5400          118       174     2012      10        24        298              0.315000      18.340881       1.026402       0.341039   -9999.000000       0.395400       0.096700       0.680000
57482     57482     hubei          113.5697       30.5400          118       174     2012      10        25        299              0.000000      16.147064       4.518359       0.341608       0.270500   -9999.000000       0.113300   -9999.000000
57482     57482     hubei          113.5697       30.5400          118       174     2012      10        26        300              0.321000      17.019226      46.079498       0.347140       0.289000       0.421600       0.149000       1.000000
57482     57482     hubei          113.5697       30.5400          118       174     2012      10        27        301              0.320458      16.461914       0.445830       0.397807       0.263000       0.501200       0.144000   -9999.000000
57482     57482     hubei          113.5697       30.5400          118       174     2012      10        28        302              0.000000      18.768250      21.413280       0.364946   -9999.000000       0.241200   -9999.000000       0.721000
57482     57482     hubei          113.5697       30.5400          118       174     2012      10        29        303              0.322458      20.048401      20.310312       0.367911   -9999.000000       0.424900   -9999.000000   -9999.000000
57482     57482     hubei          113.5697       30.5400          118       174     2012      10        30        304              0.321000      17.082245       0.558811       0.392652   -9999.000000   -9999.000000       0.099300   -9999.000000
57482     57482     hubei          113.5697       30.5400          118       174     2012      10        31        305              0.321000      16.469208       0.000000       0.366056   -9999.000000       0.422500       0.142100       0.824000
57482     57482     hubei          113.5697       30.5400          118       174     2012      11        01        306              0.320500      16.745941       0.000000       0.356368   -9999.000000       0.494500       0.138800   -9999.000000
57482     57482     hubei          113.5697       30.5400          118       174     2012      11        02        307              0.320000      15.693176       0.035005       0.351232       0.230000   -9999.000000   -9999.000000       0.656000
57482     57482     hubei          113.5697       30.5400          118       174     2012      11        03        308              0.321083      17.221497       9.672838       0.346145   -9999.000000       0.271900   -9999.000000   -9999.000000
57482     57482     hubei          113.5697       30.5400          118       174     2012      11        04        309              0.321000      12.773224       0.000000       0.365194   -9999.000000   -9999.000000       0.131500   -9999.000000
57482     57482     hubei          113.5697       30.5400          118       174     2012      11        05        310              0.320667      13.772095       0.000000       0.350881   -9999.000000       0.549600       0.136800       0.659000
57482     57482     hubei          113.5697       30.5400          118       174     2012      11        06        311              0.320000      13.014099       0.349604       0.345999       0.197000       0.369200       0.143000   -9999.000000
57482     57482     hubei          113.5697       30.5400          118       174     2012      11        07        312              0.320000      13.410034       0.429226       0.342971       0.237000   -9999.000000       0.168700       0.496000
57482     57482     hubei          113.5697       30.5400          118       174     2012      11        08        313              0.320000      13.481537       1.024008       0.342415   -9999.000000       0.274400   -9999.000000   -9999.000000
57482     57482     hubei          113.5697       30.5400          118       174     2012      11        09        314              0.320000      13.539459       3.269300       0.341861   -9999.000000       0.441700   -9999.000000       0.908000
57482     57482     hubei          113.5697       30.5400          118       174     2012      11        10        315              0.320000      11.709808       0.000000       0.351206   -9999.000000       0.477700       0.091700       0.623000
57482     57482     hubei          113.5697       30.5400          118       174     2012      11        11        316              0.320000      12.082794       0.000000       0.346026       0.166000       0.291200       0.135400   -9999.000000
57482     57482     hubei          113.5697       30.5400          118       174     2012      11        12        317              0.320000      12.265259       0.193691       0.342082       0.181000   -9999.000000       0.116700       0.440000
57482     57482     hubei          113.5697       30.5400          118       174     2012      11        13        318              0.000000      13.335327       1.545010       0.340477   -9999.000000       0.403500       0.132400   -9999.000000
57482     57482     hubei          113.5697       30.5400          118       174     2012      11        14        319              0.320000      15.144775       0.265627       0.339546       0.215000       0.565000   -9999.000000       0.492000
57482     57482     hubei          113.5697       30.5400          118       174     2012      11        15        320              0.319667      14.638367       1.085358       0.338280       0.249000       0.291600   -9999.000000   -9999.000000
57482     57482     hubei          113.5697       30.5400          118       174     2012      11        16        321              0.319000      10.565582       2.536626       0.341963   -9999.000000       0.440000       0.082200   -9999.000000
57482     57482     hubei          113.5697       30.5400          118       174     2012      11        17        322              0.000000       9.823425       1.974286       0.347994       0.188000   -9999.000000       0.113500       0.445000
57482     57482     hubei          113.5697       30.5400          118       174     2012      11        18        323              0.319000      11.375610       0.386611       0.342998       0.199000       0.323800       0.119700   -9999.000000
57482     57482     hubei          113.5697       30.5400          118       174     2012      11        19        324              0.319000      12.202332       0.051647       0.341145   -9999.000000       0.176300   -9999.000000       0.507000
57482     57482     hubei          113.5697       30.5400          118       174     2012      11        20        325              0.319000      13.127716       3.341311       0.340083   -9999.000000   -9999.000000   -9999.000000   -9999.000000
57482     57482     hubei          113.5697       30.5400          118       174     2012      11        21        326              0.319000      12.990326       0.360256       0.346820   -9999.000000       0.411500       0.095500       0.624000
57482     57482     hubei          113.5697       30.5400          118       174     2012      11        22        327              0.319583      11.641724      11.161557       0.346144       0.209000   -9999.000000       0.104900       0.761000
57482     57482     hubei          113.5697       30.5400          118       174     2012      11        23        328              0.320000      10.890961       0.000000       0.366039   -9999.000000       0.379000       0.106600   -9999.000000
57482     57482     hubei          113.5697       30.5400          118       174     2012      11        24        329              0.320000       8.647308       1.059340       0.353992   -9999.000000       0.410800       0.131800       0.703000
57482     57482     hubei          113.5697       30.5400          118       174     2012      11        25        330              0.320000       9.679657       0.061483       0.351566   -9999.000000   -9999.000000   -9999.000000   -9999.000000
57482     57482     hubei          113.5697       30.5400          118       174     2012      11        26        331              0.320000       8.167480       0.000000       0.349768   -9999.000000       0.284500   -9999.000000       0.536000
57482     57482     hubei          113.5697       30.5400          118       174     2012      11        27        332              0.320000       9.567230       0.320480       0.345537   -9999.000000       0.232500       0.061400   -9999.000000
57482     57482     hubei          113.5697       30.5400          118       174     2012      11        28        333              0.320000      10.370514       0.000000       0.344596       0.184000   -9999.000000       0.113500   -9999.000000
57482     57482     hubei          113.5697       30.5400          118       174     2012      11        29        334              0.320000      10.036316       2.063214       0.343262   -9999.000000       0.327900       0.139200       0.755000
57482     57482     hubei          113.5697       30.5400          118       174     2012      11        30        335              0.320000      10.226685       0.358187       0.346717   -9999.000000   -9999.000000       0.136500   -9999.000000
57482     57482     hubei          113.5697       30.5400          118       174     2012      12        01        336              0.320000      10.543549       4.119806       0.344887   -9999.000000   -9999.000000   -9999.000000       0.858000
57482     57482     hubei          113.5697       30.5400          118       174     2012      12        02        337              0.320000       6.732758       0.000000       0.353446   -9999.000000       0.362500       0.109400   -9999.000000
57482     57482     hubei          113.5697       30.5400          118       174     2012      12        03        338              0.320000       5.486816       0.000000       0.348307   -9999.000000   -9999.000000       0.088600   -9999.000000
57482     57482     hubei          113.5697       30.5400          118       174     2012      12        04        339              0.320000       7.326202       0.000000       0.346089   -9999.000000       0.336400       0.096700       0.617000
57482     57482     hubei          113.5697       30.5400          118       174     2012      12        05        340              0.319833       7.067383       0.000000       0.345027   -9999.000000   -9999.000000       0.122000   -9999.000000
57482     57482     hubei          113.5697       30.5400          118       174     2012      12        06        341              0.319000       8.967590       0.000000       0.342798   -9999.000000       0.261600   -9999.000000       0.357000
57482     57482     hubei          113.5697       30.5400          118       174     2012      12        07        342              0.319000       8.518280       0.503170       0.342443       0.153000       0.348100   -9999.000000   -9999.000000
57482     57482     hubei          113.5697       30.5400          118       174     2012      12        08        343              0.319000       9.413147       0.000000       0.341025   -9999.000000   -9999.000000       0.083500       0.503000
57482     57482     hubei          113.5697       30.5400          118       174     2012      12        09        344              0.319000       8.313660       0.059610       0.339295   -9999.000000       0.358600       0.116200       0.323000
57482     57482     hubei          113.5697       30.5400          118       174     2012      12        10        345              0.319000       7.014587       0.720895       0.338478   -9999.000000   -9999.000000       0.119100   -9999.000000
57482     57482     hubei          113.5697       30.5400          118       174     2012      12        11        346              0.319000       5.715729       0.000000       0.340725   -9999.000000       0.528800       0.135900       0.299000
57482     57482     hubei          113.5697       30.5400          118       174     2012      12        12        347              0.319000       6.355499       3.046731       0.339715   -9999.000000       0.310200   -9999.000000   -9999.000000
57482     57482     hubei          113.5697       30.5400          118       174     2012      12        13        348              0.321292       7.655365      14.679469       0.342499       0.201000   -9999.000000   -9999.000000       0.846000
57482     57482     hubei          113.5697       30.5400          118       174     2012      12        14        349              0.321250       6.872406       6.306962       0.374320   -9999.000000       0.325400       0.071100   -9999.000000
57482     57482     hubei          113.5697       30.5400          118       174     2012      12        15        350              0.000000       5.070068       0.000000       0.367896   -9999.000000   -9999.000000       0.138200   -9999.000000
57482     57482     hubei          113.5697       30.5400          118       174     2012      12        16        351              0.320542       6.057373       0.270390       0.358104   -9999.000000       0.501100       0.155700       0.708000
57482     57482     hubei          113.5697       30.5400          118       174     2012      12        17        352              0.320792       6.315125      13.363158       0.353248   -9999.000000       0.248500   -9999.000000   -9999.000000
57482     57482     hubei          113.5697       30.5400          118       174     2012      12        18        353              0.320750       4.933716       0.000000       0.370957   -9999.000000   -9999.000000   -9999.000000       0.612000
57482     57482     hubei          113.5697       30.5400          118       174     2012      12        19        354              0.320000       4.302521       0.372887       0.357221   -9999.000000       0.439200       0.132500   -9999.000000
57482     57482     hubei          113.5697       30.5400          118       174     2012      12        20        355              0.000000       5.176086       1.678946       0.353875   -9999.000000       0.257100       0.128700       0.802000
57482     57482     hubei          113.5697       30.5400          118       174     2012      12        21        356              0.320000       2.316711       0.000000       0.353768   -9999.000000   -9999.000000       0.116500       0.657000
57482     57482     hubei          113.5697       30.5400          118       174     2012      12        22        357              0.320000       3.081421       0.646160       0.350281   -9999.000000       0.425100       0.136600   -9999.000000
57482     57482     hubei          113.5697       30.5400          118       174     2012      12        23        358              0.320000       3.216034       0.000000       0.341762   -9999.000000   -9999.000000   -9999.000000       0.122000
57482     57482     hubei          113.5697       30.5400          118       174     2012      12        24        359              0.320000       2.921631       0.868581       0.327900   -9999.000000       0.521100   -9999.000000   -9999.000000
57482     57482     hubei          113.5697       30.5400          118       174     2012      12        25        360              0.320000       4.522522       0.000000       0.342726   -9999.000000       0.488200       0.071900       0.359000
57482     57482     hubei          113.5697       30.5400          118       174     2012      12        26        361              0.000000       2.691864       0.564505       0.339181   -9999.000000   -9999.000000       0.106000   -9999.000000
57482     57482     hubei          113.5697       30.5400          118       174     2012      12        27        362              0.320000       1.305756       1.860259       0.324248   -9999.000000       0.246000       0.118600   -9999.000000
57482     57482     hubei          113.5697       30.5400          118       174     2012      12        28        363              0.320000       1.525208      10.218507       0.334157   -9999.000000   -9999.000000       0.137100       0.652000
57482     57482     hubei          113.5697       30.5400          118       174     2012      12        29        364              0.000000       2.310364       5.616654       0.346853   -9999.000000   -9999.000000   -9999.000000   -9999.000000
57482     57482     hubei          113.5697       30.5400          118       174     2012      12        30        365              0.000000       1.581238       0.341927       0.363456   -9999.000000       0.162200   -9999.000000       0.047000
57482     57482     hubei          113.5697       30.5400          118       174     2012      12        31        366              0.320000       2.300995       0.533765       0.333617   -9999.000000   -9999.000000       0.052800   -9999.000000
