# Supplementary material for: Research on Fusing Multisatellite Soil Moisture Data Based on Bayesian Model Averaging
Source: Hindawi journal article supplement (doi:10.1155/2018/9310838), 2018-06-25
Supplement: f1 [file 9310838.f1.zip › 2012_sm00-10cm_daily_ZDB_ZHY_57485_366days_allin.txt]

57485     57485     hubei          113.4300       30.3700          119       174     2012      01        01        001              0.000000   -9999.000000       0.000000   -9999.000000   -9999.000000   -9999.000000       0.120800   -9999.000000
57485     57485     hubei          113.4300       30.3700          119       174     2012      01        02        002              0.138458       4.101440       1.688338       0.345715   -9999.000000       0.224400       0.139500   -9999.000000
57485     57485     hubei          113.4300       30.3700          119       174     2012      01        03        003              0.000000       4.478149       0.000000       0.349843   -9999.000000       0.176900   -9999.000000       0.024000
57485     57485     hubei          113.4300       30.3700          119       174     2012      01        04        004              0.134625       2.166748       0.000000       0.326421   -9999.000000       0.082800   -9999.000000   -9999.000000
57485     57485     hubei          113.4300       30.3700          119       174     2012      01        05        005              0.133375       3.206665       0.000000       0.335256   -9999.000000       0.066800       0.107900       0.060000
57485     57485     hubei          113.4300       30.3700          119       174     2012      01        06        006              0.133042       2.138092       0.000000       0.329780   -9999.000000   -9999.000000       0.130800   -9999.000000
57485     57485     hubei          113.4300       30.3700          119       174     2012      01        07        007              0.129417       4.140656       0.000000       0.339433   -9999.000000       0.337900       0.152300       0.144000
57485     57485     hubei          113.4300       30.3700          119       174     2012      01        08        008              0.000000       2.209534       0.000000       0.339686   -9999.000000       0.252600   -9999.000000       0.126000
57485     57485     hubei          113.4300       30.3700          119       174     2012      01        09        009              0.131792       2.836517       0.000000       0.343734   -9999.000000   -9999.000000   -9999.000000   -9999.000000
57485     57485     hubei          113.4300       30.3700          119       174     2012      01        10        010              0.131458       4.606567       0.000000       0.346012   -9999.000000       0.057300       0.088000       0.097000
57485     57485     hubei          113.4300       30.3700          119       174     2012      01        11        011              0.127333       4.684906       0.000000       0.345844   -9999.000000   -9999.000000       0.093300   -9999.000000
57485     57485     hubei          113.4300       30.3700          119       174     2012      01        12        012              0.127208       3.293182       0.000000       0.345185   -9999.000000       0.214400       0.108800       0.261000
57485     57485     hubei          113.4300       30.3700          119       174     2012      01        13        013              0.145833       3.252228       6.791055       0.345961   -9999.000000       0.284300       0.104000   -9999.000000
57485     57485     hubei          113.4300       30.3700          119       174     2012      01        14        014              0.231167       3.076019       3.022956       0.354294   -9999.000000   -9999.000000   -9999.000000   -9999.000000
57485     57485     hubei          113.4300       30.3700          119       174     2012      01        15        015              0.252625       2.829651       0.306355       0.359221   -9999.000000       0.223200   -9999.000000       1.000000
57485     57485     hubei          113.4300       30.3700          119       174     2012      01        16        016              0.258917       2.821014       0.000000       0.355304   -9999.000000       0.328500       0.063000   -9999.000000
57485     57485     hubei          113.4300       30.3700          119       174     2012      01        17        017              0.000000       3.977905       2.026080       0.351648   -9999.000000       0.208100       0.107700       0.912000
57485     57485     hubei          113.4300       30.3700          119       174     2012      01        18        018              0.263542       3.892975       1.200449       0.353290   -9999.000000       0.125100       0.114000   -9999.000000
57485     57485     hubei          113.4300       30.3700          119       174     2012      01        19        019              0.256417       4.500366       0.809364       0.354416   -9999.000000   -9999.000000       0.122400   -9999.000000
57485     57485     hubei          113.4300       30.3700          119       174     2012      01        20        020              0.269208       3.894684       5.203026       0.351601   -9999.000000       0.196000   -9999.000000       1.000000
57485     57485     hubei          113.4300       30.3700          119       174     2012      01        21        021              0.268583       3.445740       0.602144       0.359811   -9999.000000       0.258700   -9999.000000   -9999.000000
57485     57485     hubei          113.4300       30.3700          119       174     2012      01        22        022              0.245125       1.508850       3.066525       0.324737   -9999.000000   -9999.000000       0.043600       0.091000
57485     57485     hubei          113.4300       30.3700          119       174     2012      01        23        023              0.239125       0.600250       0.947457       0.292653   -9999.000000       0.241000       0.137600   -9999.000000
57485     57485     hubei          113.4300       30.3700          119       174     2012      01        24        024              0.229652       1.253204       0.000000       0.304832   -9999.000000   -9999.000000   -9999.000000       0.011000
57485     57485     hubei          113.4300       30.3700          119       174     2012      01        25        025              0.212333       2.627960       0.000000       0.317886   -9999.000000   -9999.000000   -9999.000000       0.099000
57485     57485     hubei          113.4300       30.3700          119       174     2012      01        26        026              0.209792       3.104431       0.000000       0.323700   -9999.000000       0.155200   -9999.000000   -9999.000000
57485     57485     hubei          113.4300       30.3700          119       174     2012      01        27        027              0.209583       4.714691       0.000000       0.342762   -9999.000000   -9999.000000       0.099900       0.259000
57485     57485     hubei          113.4300       30.3700          119       174     2012      01        28        028              0.201667       3.564117       0.000000       0.346763   -9999.000000       0.164300       0.114800   -9999.000000
57485     57485     hubei          113.4300       30.3700          119       174     2012      01        29        029              0.203833       4.871094       0.288283       0.346445   -9999.000000   -9999.000000       0.141500       0.462000
57485     57485     hubei          113.4300       30.3700          119       174     2012      01        30        030              0.208292       4.222382       0.000000       0.347501   -9999.000000       0.336000       0.145500   -9999.000000
57485     57485     hubei          113.4300       30.3700          119       174     2012      01        31        031              0.198042       3.926575       0.000000       0.344461   -9999.000000       0.383100   -9999.000000   -9999.000000
57485     57485     hubei          113.4300       30.3700          119       174     2012      02        01        032              0.182542       5.951416       0.000000       0.345286   -9999.000000   -9999.000000   -9999.000000       0.098000
57485     57485     hubei          113.4300       30.3700          119       174     2012      02        02        033              0.167130       4.669464       0.000000       0.344231   -9999.000000       0.362000       0.058100   -9999.000000
57485     57485     hubei          113.4300       30.3700          119       174     2012      02        03        034              0.162667       2.428986       0.000000       0.329093   -9999.000000       0.169900       0.109500       0.034000
57485     57485     hubei          113.4300       30.3700          119       174     2012      02        04        035              0.158750       4.883057       0.000000       0.340605   -9999.000000       0.206000       0.128700   -9999.000000
57485     57485     hubei          113.4300       30.3700          119       174     2012      02        05        036              0.194542       3.442749       4.359236       0.343333   -9999.000000       0.266500       0.151500       0.796000
57485     57485     hubei          113.4300       30.3700          119       174     2012      02        06        037              0.243583       3.418732       0.231937       0.353648   -9999.000000   -9999.000000   -9999.000000       0.640000
57485     57485     hubei          113.4300       30.3700          119       174     2012      02        07        038              0.210875       4.627289       0.000000       0.351611   -9999.000000       0.203700   -9999.000000   -9999.000000
57485     57485     hubei          113.4300       30.3700          119       174     2012      02        08        039              0.190458       4.255310       0.149209       0.342001   -9999.000000       0.417100       0.104000       0.162000
57485     57485     hubei          113.4300       30.3700          119       174     2012      02        09        040              0.177792       4.599487       0.000000       0.343480   -9999.000000       0.123900       0.132600   -9999.000000
57485     57485     hubei          113.4300       30.3700          119       174     2012      02        10        041              0.169583       2.556793       0.000000       0.336655   -9999.000000       0.113800       0.127900       0.046000
57485     57485     hubei          113.4300       30.3700          119       174     2012      02        11        042              0.169333       4.628571       0.000000       0.340290   -9999.000000   -9999.000000   -9999.000000   -9999.000000
57485     57485     hubei          113.4300       30.3700          119       174     2012      02        12        043              0.163417       6.701324       1.992256       0.343095   -9999.000000       0.196300   -9999.000000   -9999.000000
57485     57485     hubei          113.4300       30.3700          119       174     2012      02        13        044              0.168833       5.189178       0.345357       0.346646   -9999.000000       0.134700   -9999.000000       0.437000
57485     57485     hubei          113.4300       30.3700          119       174     2012      02        14        045              0.198667       4.487152       3.506281       0.348640   -9999.000000   -9999.000000       0.126400   -9999.000000
57485     57485     hubei          113.4300       30.3700          119       174     2012      02        15        046              0.248667       3.900726       0.660206       0.353648   -9999.000000       0.111300       0.185000       0.849000
57485     57485     hubei          113.4300       30.3700          119       174     2012      02        16        047              0.247000       3.955811       0.000000       0.352042   -9999.000000   -9999.000000       0.140700   -9999.000000
57485     57485     hubei          113.4300       30.3700          119       174     2012      02        17        048              0.230000       5.576599       0.000000       0.348662   -9999.000000       0.479100   -9999.000000   -9999.000000
57485     57485     hubei          113.4300       30.3700          119       174     2012      02        18        049              0.212958       6.536652       0.000000       0.345714   -9999.000000       0.220000   -9999.000000       0.306000
57485     57485     hubei          113.4300       30.3700          119       174     2012      02        19        050              0.197542       6.249725       0.047109       0.344069   -9999.000000   -9999.000000       0.074300   -9999.000000
57485     57485     hubei          113.4300       30.3700          119       174     2012      02        20        051              0.189478       7.841553       0.042540       0.342314   -9999.000000       0.264000       0.110100       0.363000
57485     57485     hubei          113.4300       30.3700          119       174     2012      02        21        052              0.204875       7.030640       5.546926       0.343680   -9999.000000   -9999.000000   -9999.000000   -9999.000000
57485     57485     hubei          113.4300       30.3700          119       174     2012      02        22        053              0.292750       7.506317       8.695329       0.351643   -9999.000000   -9999.000000       0.165200       0.556000
57485     57485     hubei          113.4300       30.3700          119       174     2012      02        23        054              0.284125       8.035461       1.097024       0.368012   -9999.000000       0.445700   -9999.000000       0.723000
57485     57485     hubei          113.4300       30.3700          119       174     2012      02        24        055              0.269167       6.840607       0.000000       0.356905   -9999.000000   -9999.000000   -9999.000000   -9999.000000
57485     57485     hubei          113.4300       30.3700          119       174     2012      02        25        056              0.273083       4.773956       2.541553       0.352107   -9999.000000       0.243700       0.105000       0.598000
57485     57485     hubei          113.4300       30.3700          119       174     2012      02        26        057              0.268250       3.885162       0.769260       0.354097   -9999.000000       0.377000       0.107800   -9999.000000
57485     57485     hubei          113.4300       30.3700          119       174     2012      02        27        058              0.255565       5.674713       1.762395       0.349575   -9999.000000       0.123100   -9999.000000       0.283000
57485     57485     hubei          113.4300       30.3700          119       174     2012      02        28        059              0.240875       5.327789       0.362260       0.347481   -9999.000000   -9999.000000   -9999.000000   -9999.000000
57485     57485     hubei          113.4300       30.3700          119       174     2012      02        29        060              0.000000   -9999.000000       0.000000   -9999.000000   -9999.000000   -9999.000000   -9999.000000   -9999.000000
57485     57485     hubei          113.4300       30.3700          119       174     2012      03        01        061              0.226500       7.788300       0.145072       0.344980   -9999.000000       0.208900       0.101900       0.171000
57485     57485     hubei          113.4300       30.3700          119       174     2012      03        02        062              0.236125       7.272583      10.927194       0.344800   -9999.000000       0.236000       0.125000   -9999.000000
57485     57485     hubei          113.4300       30.3700          119       174     2012      03        03        063              0.301750       6.984985      10.387827       0.354920   -9999.000000   -9999.000000       0.144200       0.518000
57485     57485     hubei          113.4300       30.3700          119       174     2012      03        04        064              0.305292       6.104797       0.963459       0.370660   -9999.000000       0.234700       0.168100   -9999.000000
57485     57485     hubei          113.4300       30.3700          119       174     2012      03        05        065              0.298625       4.404785       0.000000       0.364270   -9999.000000   -9999.000000   -9999.000000       0.490000
57485     57485     hubei          113.4300       30.3700          119       174     2012      03        06        066              0.293875       7.205261       2.614668       0.354981   -9999.000000   -9999.000000   -9999.000000       0.443000
57485     57485     hubei          113.4300       30.3700          119       174     2012      03        07        067              0.000000       7.309723       5.772509       0.355414   -9999.000000       0.275900       0.086100   -9999.000000
57485     57485     hubei          113.4300       30.3700          119       174     2012      03        08        068              0.307833       6.504547       3.735215       0.363669   -9999.000000   -9999.000000       0.116300       0.600000
57485     57485     hubei          113.4300       30.3700          119       174     2012      03        09        069              0.301783       5.616699       0.744851       0.363326   -9999.000000       0.278300       0.149000   -9999.000000
57485     57485     hubei          113.4300       30.3700          119       174     2012      03        10        070              0.288083       6.186859       0.000000       0.356817   -9999.000000   -9999.000000   -9999.000000       0.236000
57485     57485     hubei          113.4300       30.3700          119       174     2012      03        11        071              0.277208       9.517944       0.000000       0.351599   -9999.000000       0.274700   -9999.000000   -9999.000000
57485     57485     hubei          113.4300       30.3700          119       174     2012      03        12        072              0.267500       8.189636       0.000000       0.350176   -9999.000000       0.202100       0.110500   -9999.000000
57485     57485     hubei          113.4300       30.3700          119       174     2012      03        13        073              0.253304      10.325439       0.000000       0.347904   -9999.000000   -9999.000000       0.102200       0.136000
57485     57485     hubei          113.4300       30.3700          119       174     2012      03        14        074              0.239958      12.583832       3.303880       0.345938   -9999.000000       0.132500       0.139600   -9999.000000
57485     57485     hubei          113.4300       30.3700          119       174     2012      03        15        075              0.259458      14.007904       0.470822       0.348035   -9999.000000       0.620000       0.138200       0.414000
57485     57485     hubei          113.4300       30.3700          119       174     2012      03        16        076              0.254000      11.585419       0.274152       0.353014   -9999.000000       0.080000   -9999.000000   -9999.000000
57485     57485     hubei          113.4300       30.3700          119       174     2012      03        17        077              0.270375      10.422913       0.636309       0.349356   -9999.000000       0.142000   -9999.000000   -9999.000000
57485     57485     hubei          113.4300       30.3700          119       174     2012      03        18        078              0.268609      11.164398       1.150946       0.349613   -9999.000000   -9999.000000       0.092600       0.117000
57485     57485     hubei          113.4300       30.3700          119       174     2012      03        19        079              0.389958      14.489563       0.452156       0.348381   -9999.000000       0.147300       0.174800   -9999.000000
57485     57485     hubei          113.4300       30.3700          119       174     2012      03        20        080              0.391652       7.972565       0.214965       0.348488   -9999.000000       0.290100       0.163400       0.073000
57485     57485     hubei          113.4300       30.3700          119       174     2012      03        21        081              0.406125       7.554291      14.551590       0.347935       0.368000   -9999.000000       0.204700   -9999.000000
57485     57485     hubei          113.4300       30.3700          119       174     2012      03        22        082              0.463417       9.745239      30.304478       0.359379   -9999.000000       0.278400   -9999.000000       0.622000
57485     57485     hubei          113.4300       30.3700          119       174     2012      03        23        083              0.460708       7.374542       0.565384       0.394417   -9999.000000   -9999.000000   -9999.000000       0.344000
57485     57485     hubei          113.4300       30.3700          119       174     2012      03        24        084              0.429583      12.031616       0.359858       0.369111   -9999.000000   -9999.000000   -9999.000000   -9999.000000
57485     57485     hubei          113.4300       30.3700          119       174     2012      03        25        085              0.000000      14.389771       0.316437       0.358775   -9999.000000       0.205800       0.176100       0.189000
57485     57485     hubei          113.4300       30.3700          119       174     2012      03        26        086              0.349958      16.389160       0.000000       0.354984   -9999.000000   -9999.000000       0.211000   -9999.000000
57485     57485     hubei          113.4300       30.3700          119       174     2012      03        27        087              0.313042      18.339050       0.089148       0.352249   -9999.000000       0.264800   -9999.000000       0.127000
57485     57485     hubei          113.4300       30.3700          119       174     2012      03        28        088              0.288458      19.785492       0.725798       0.350146   -9999.000000   -9999.000000   -9999.000000   -9999.000000
57485     57485     hubei          113.4300       30.3700          119       174     2012      03        29        089              0.324875      19.286285      13.405088       0.351053   -9999.000000       0.227800       0.186900   -9999.000000
57485     57485     hubei          113.4300       30.3700          119       174     2012      03        30        090              0.442708      17.724213       1.942725       0.365486   -9999.000000       0.433200       0.229200       0.148000
57485     57485     hubei          113.4300       30.3700          119       174     2012      03        31        091              0.388292      15.782501       0.000000       0.367831   -9999.000000   -9999.000000       0.169500   -9999.000000
57485     57485     hubei          113.4300       30.3700          119       174     2012      04        01        092              0.322083      17.199432       0.471191       0.354480   -9999.000000       0.339400       0.211900       0.138000
57485     57485     hubei          113.4300       30.3700          119       174     2012      04        02        093              0.271708      18.837189       0.000000       0.349902       0.264000       0.527800   -9999.000000   -9999.000000
57485     57485     hubei          113.4300       30.3700          119       174     2012      04        03        094              0.242500      19.247772       0.406315       0.346182   -9999.000000       0.135600   -9999.000000       0.113000
57485     57485     hubei          113.4300       30.3700          119       174     2012      04        04        095              0.269958      16.485138       6.374232       0.346819   -9999.000000       0.404800       0.140700       0.304000
57485     57485     hubei          113.4300       30.3700          119       174     2012      04        05        096              0.281417      13.454407       0.123446       0.361773   -9999.000000   -9999.000000       0.176900   -9999.000000
57485     57485     hubei          113.4300       30.3700          119       174     2012      04        06        097              0.269542      15.349152       0.636733       0.353591       0.208000       0.112900       0.186300       0.044000
57485     57485     hubei          113.4300       30.3700          119       174     2012      04        07        098              0.255708      19.520233       0.375911       0.349049       0.244000       0.274700       0.204400   -9999.000000
57485     57485     hubei          113.4300       30.3700          119       174     2012      04        08        099              0.243042      20.721771       0.076670       0.345861   -9999.000000   -9999.000000   -9999.000000       0.150000
57485     57485     hubei          113.4300       30.3700          119       174     2012      04        09        100              0.327958      19.467438       6.841976       0.345995   -9999.000000       0.155500   -9999.000000   -9999.000000
57485     57485     hubei          113.4300       30.3700          119       174     2012      04        10        101              0.409667      17.759979      13.463587       0.361188   -9999.000000   -9999.000000       0.104400   -9999.000000
57485     57485     hubei          113.4300       30.3700          119       174     2012      04        11        102              0.404292      18.274811       0.643019       0.372638   -9999.000000       0.276700       0.138700       0.503000
57485     57485     hubei          113.4300       30.3700          119       174     2012      04        12        103              0.445958      20.055054      17.187149       0.359257   -9999.000000   -9999.000000       0.174500   -9999.000000
57485     57485     hubei          113.4300       30.3700          119       174     2012      04        13        104              0.432875      15.284607       0.192542       0.378448   -9999.000000   -9999.000000   -9999.000000       0.228000
57485     57485     hubei          113.4300       30.3700          119       174     2012      04        14        105              0.416708      16.829498       0.093771       0.361988   -9999.000000       0.263000   -9999.000000   -9999.000000
57485     57485     hubei          113.4300       30.3700          119       174     2012      04        15        106              0.412542      14.983398       0.340805       0.358900   -9999.000000   -9999.000000       0.143900   -9999.000000
57485     57485     hubei          113.4300       30.3700          119       174     2012      04        16        107              0.404583      16.467865       0.069915       0.356067   -9999.000000       0.215000       0.179500       0.538000
57485     57485     hubei          113.4300       30.3700          119       174     2012      04        17        108              0.396958      19.264526       0.000000       0.353334   -9999.000000       0.295500       0.199200   -9999.000000
57485     57485     hubei          113.4300       30.3700          119       174     2012      04        18        109              0.389250      19.327301       0.000000       0.353332       0.292000   -9999.000000   -9999.000000       0.230000
57485     57485     hubei          113.4300       30.3700          119       174     2012      04        19        110              0.380125      20.971924       0.000000       0.350308   -9999.000000       0.178600   -9999.000000   -9999.000000
57485     57485     hubei          113.4300       30.3700          119       174     2012      04        20        111              0.402750      22.993744       0.657304       0.346881   -9999.000000       0.293100   -9999.000000       0.451000
57485     57485     hubei          113.4300       30.3700          119       174     2012      04        21        112              0.400542      17.930969       1.540697       0.350144       0.212000       0.076700       0.125500       0.577000
57485     57485     hubei          113.4300       30.3700          119       174     2012      04        22        113              0.384000      21.202484       6.481004       0.345224   -9999.000000       0.347000       0.175300   -9999.000000
57485     57485     hubei          113.4300       30.3700          119       174     2012      04        23        114              0.387958      23.098694       6.392237       0.352072       0.319000   -9999.000000       0.261100       0.503000
57485     57485     hubei          113.4300       30.3700          119       174     2012      04        24        115              0.427625      23.579712      22.197412       0.356012   -9999.000000       0.302700       0.353000   -9999.000000
57485     57485     hubei          113.4300       30.3700          119       174     2012      04        25        116              0.000000      20.408997       0.310767       0.384301   -9999.000000       0.419700   -9999.000000       0.776000
57485     57485     hubei          113.4300       30.3700          119       174     2012      04        26        117              0.404625      19.837799       0.079907       0.361275   -9999.000000   -9999.000000   -9999.000000   -9999.000000
57485     57485     hubei          113.4300       30.3700          119       174     2012      04        27        118              0.384708      22.160248       0.381274       0.352330   -9999.000000       0.383000   -9999.000000   -9999.000000
57485     57485     hubei          113.4300       30.3700          119       174     2012      04        28        119              0.389125      23.736206      12.848877       0.348776       0.308000   -9999.000000       0.241600       0.698000
57485     57485     hubei          113.4300       30.3700          119       174     2012      04        29        120              0.390833      23.488342       0.546460       0.367753   -9999.000000   -9999.000000       0.277500   -9999.000000
57485     57485     hubei          113.4300       30.3700          119       174     2012      04        30        121              0.424167      23.103912      18.679520       0.358959       0.403000       0.325600   -9999.000000       1.000000
57485     57485     hubei          113.4300       30.3700          119       174     2012      05        01        122              0.428333      21.428467       1.270582       0.381518   -9999.000000   -9999.000000   -9999.000000   -9999.000000
57485     57485     hubei          113.4300       30.3700          119       174     2012      05        02        123              0.422667      21.712036       8.560100       0.363937       0.335500       0.301100       0.146900       0.595000
57485     57485     hubei          113.4300       30.3700          119       174     2012      05        03        124              0.429833      22.804291       4.479377       0.366038       0.353000   -9999.000000       0.187900       0.712000
57485     57485     hubei          113.4300       30.3700          119       174     2012      05        04        125              0.421583      21.146698       0.000000       0.372129   -9999.000000       0.241300       0.230600   -9999.000000
57485     57485     hubei          113.4300       30.3700          119       174     2012      05        05        126              0.405125      24.127441       0.000000       0.360374       0.294000   -9999.000000       0.220100       0.522000
57485     57485     hubei          113.4300       30.3700          119       174     2012      05        06        127              0.387750      26.138580       0.000000       0.355451       0.206000   -9999.000000   -9999.000000   -9999.000000
57485     57485     hubei          113.4300       30.3700          119       174     2012      05        07        128              0.393917      27.504333      15.215439       0.352667   -9999.000000       0.213800   -9999.000000       0.778000
57485     57485     hubei          113.4300       30.3700          119       174     2012      05        08        129              0.433458      27.553650       2.881224       0.366196       0.332000       0.326600       0.137400   -9999.000000
57485     57485     hubei          113.4300       30.3700          119       174     2012      05        09        130              0.432458      26.753540       6.170251       0.367775       0.463000       0.144200       0.184800   -9999.000000
57485     57485     hubei          113.4300       30.3700          119       174     2012      05        10        131              0.422875      22.760620       0.000000       0.369758   -9999.000000       0.437700       0.226400       0.726000
57485     57485     hubei          113.4300       30.3700          119       174     2012      05        11        132              0.409667      26.687378       1.333268       0.356893       0.317000   -9999.000000       0.232000   -9999.000000
57485     57485     hubei          113.4300       30.3700          119       174     2012      05        12        133              0.424125      27.210693      16.595367       0.355675   -9999.000000       0.509700   -9999.000000       0.867000
57485     57485     hubei          113.4300       30.3700          119       174     2012      05        13        134              0.431708      21.376556      22.574291       0.377119   -9999.000000       0.331900   -9999.000000   -9999.000000
57485     57485     hubei          113.4300       30.3700          119       174     2012      05        14        135              0.433333      23.018463       9.494517       0.380226   -9999.000000   -9999.000000       0.197800   -9999.000000
57485     57485     hubei          113.4300       30.3700          119       174     2012      05        15        136              0.427208      19.611328       0.241577       0.384466   -9999.000000       0.253100       0.225700       0.652000
57485     57485     hubei          113.4300       30.3700          119       174     2012      05        16        137              0.415333      21.391541       0.085430       0.370528   -9999.000000   -9999.000000       0.266500   -9999.000000
57485     57485     hubei          113.4300       30.3700          119       174     2012      05        17        138              0.395625      24.362946       0.062063       0.364492   -9999.000000       0.361300   -9999.000000       0.355000
57485     57485     hubei          113.4300       30.3700          119       174     2012      05        18        139              0.392375      26.673248      16.413227       0.359473       0.255000       0.531000   -9999.000000   -9999.000000
57485     57485     hubei          113.4300       30.3700          119       174     2012      05        19        140              0.423250      24.093903       0.278077       0.372005   -9999.000000   -9999.000000       0.218100       0.408000
57485     57485     hubei          113.4300       30.3700          119       174     2012      05        20        141              0.404833      24.884796       0.630947       0.369266   -9999.000000       0.202900       0.259500       0.582000
57485     57485     hubei          113.4300       30.3700          119       174     2012      05        21        142              0.386625      24.499207       0.000000       0.360165   -9999.000000   -9999.000000       0.184100   -9999.000000
57485     57485     hubei          113.4300       30.3700          119       174     2012      05        22        143              0.397708      24.496277       7.922355       0.358644       0.295000       0.251100       0.194400       0.807000
57485     57485     hubei          113.4300       30.3700          119       174     2012      05        23        144              0.427542      22.977875      11.707270       0.368126   -9999.000000       0.401300   -9999.000000   -9999.000000
57485     57485     hubei          113.4300       30.3700          119       174     2012      05        24        145              0.431917      22.262085       3.593529       0.375666       0.424000   -9999.000000   -9999.000000       0.761000
57485     57485     hubei          113.4300       30.3700          119       174     2012      05        25        146              0.000000      21.404572       1.788214       0.372100   -9999.000000       0.395700       0.208800   -9999.000000
57485     57485     hubei          113.4300       30.3700          119       174     2012      05        26        147              0.415292      22.231873       0.000000       0.366969   -9999.000000       0.299100       0.185500   -9999.000000
57485     57485     hubei          113.4300       30.3700          119       174     2012      05        27        148              0.396042      24.480072       0.271864       0.360230   -9999.000000   -9999.000000       0.226300       0.306000
57485     57485     hubei          113.4300       30.3700          119       174     2012      05        28        149              0.386583      26.656342      15.856109       0.357032       0.359000       0.659800       0.226300   -9999.000000
57485     57485     hubei          113.4300       30.3700          119       174     2012      05        29        150              0.431000      27.779968      46.775703       0.364660       0.472000   -9999.000000   -9999.000000       0.925000
57485     57485     hubei          113.4300       30.3700          119       174     2012      05        30        151              0.423083      22.145538       0.227339       0.404366   -9999.000000       0.616900   -9999.000000   -9999.000000
57485     57485     hubei          113.4300       30.3700          119       174     2012      05        31        152              0.405667      25.318481       0.162454       0.380588   -9999.000000       0.715900   -9999.000000   -9999.000000
57485     57485     hubei          113.4300       30.3700          119       174     2012      06        01        153              0.401125      25.750793       0.582467       0.374031   -9999.000000       0.445700       0.251600       0.571000
57485     57485     hubei          113.4300       30.3700          119       174     2012      06        02        154              0.393375      22.868195       1.604059       0.372247   -9999.000000       0.309200       0.254600   -9999.000000
57485     57485     hubei          113.4300       30.3700          119       174     2012      06        03        155              0.383667      25.440887       0.567033       0.365591       0.497000   -9999.000000   -9999.000000       0.421000
57485     57485     hubei          113.4300       30.3700          119       174     2012      06        04        156              0.380750      24.845154       0.113262       0.364211   -9999.000000       0.367200   -9999.000000   -9999.000000
57485     57485     hubei          113.4300       30.3700          119       174     2012      06        05        157              0.377833      24.792847       3.255477       0.362468   -9999.000000       0.295300       0.244800       0.385000
57485     57485     hubei          113.4300       30.3700          119       174     2012      06        06        158              0.386375      26.379913       2.412784       0.362539       0.469000   -9999.000000       0.292500   -9999.000000
57485     57485     hubei          113.4300       30.3700          119       174     2012      06        07        159              0.390250      25.724518       0.000000       0.365205       0.351000       0.349000       0.274400   -9999.000000
57485     57485     hubei          113.4300       30.3700          119       174     2012      06        08        160              0.378750      27.657928       0.051647       0.359151       0.331000   -9999.000000       0.267800       0.359000
57485     57485     hubei          113.4300       30.3700          119       174     2012      06        09        161              0.371583      28.498352       0.035893       0.355009       0.337000       0.419100   -9999.000000   -9999.000000
57485     57485     hubei          113.4300       30.3700          119       174     2012      06        10        162              0.384333      30.280945       3.721705       0.350643   -9999.000000       0.485500   -9999.000000       0.630000
57485     57485     hubei          113.4300       30.3700          119       174     2012      06        11        163              0.000000      27.819702       0.212762       0.356617   -9999.000000   -9999.000000       0.166800   -9999.000000
57485     57485     hubei          113.4300       30.3700          119       174     2012      06        12        164              0.372167      27.876373       0.000000       0.350196   -9999.000000       0.665100       0.213800   -9999.000000
57485     57485     hubei          113.4300       30.3700          119       174     2012      06        13        165              0.365250      29.221832       0.000000       0.343279       0.368000       0.407500       0.233800       0.568000
57485     57485     hubei          113.4300       30.3700          119       174     2012      06        14        166              0.361500      29.711365       0.058351       0.338576       0.411000       0.234600   -9999.000000   -9999.000000
57485     57485     hubei          113.4300       30.3700          119       174     2012      06        15        167              0.357708      29.296783       0.000000       0.338761   -9999.000000       0.350500   -9999.000000       0.426000
57485     57485     hubei          113.4300       30.3700          119       174     2012      06        16        168              0.357375      28.760406       0.000000       0.332394   -9999.000000   -9999.000000       0.187700   -9999.000000
57485     57485     hubei          113.4300       30.3700          119       174     2012      06        17        169              0.355083      29.070038       0.418051       0.329350   -9999.000000       0.347800       0.179900       0.122000
57485     57485     hubei          113.4300       30.3700          119       174     2012      06        18        170              0.353125      29.166840       0.110574       0.325957       0.402000       0.265300       0.184100       0.619000
57485     57485     hubei          113.4300       30.3700          119       174     2012      06        19        171              0.351167      29.733704       1.199739       0.325326       0.390500   -9999.000000       0.186900   -9999.000000
57485     57485     hubei          113.4300       30.3700          119       174     2012      06        20        172              0.349542      30.047272       0.000000       0.321418       0.401000       0.190100   -9999.000000       0.364000
57485     57485     hubei          113.4300       30.3700          119       174     2012      06        21        173              0.348375      30.875580       1.171942       0.320058   -9999.000000   -9999.000000   -9999.000000   -9999.000000
57485     57485     hubei          113.4300       30.3700          119       174     2012      06        22        174              0.347083      31.159149       1.438985       0.318427       0.485000       0.525000       0.135000       0.451000
57485     57485     hubei          113.4300       30.3700          119       174     2012      06        23        175              0.346000      30.457184       0.000000       0.320617       0.394500       0.545200       0.150700   -9999.000000
57485     57485     hubei          113.4300       30.3700          119       174     2012      06        24        176              0.344625      30.635803       0.000000       0.317656       0.370000   -9999.000000       0.163700   -9999.000000
57485     57485     hubei          113.4300       30.3700          119       174     2012      06        25        177              0.344542      30.888184      13.412147       0.313950       0.368000       0.504000       0.130100       0.193000
57485     57485     hubei          113.4300       30.3700          119       174     2012      06        26        178              0.434500      30.053894      95.031845       0.334467   -9999.000000   -9999.000000   -9999.000000   -9999.000000
57485     57485     hubei          113.4300       30.3700          119       174     2012      06        27        179              0.441875      27.191895      34.888840       0.418868       0.500000       0.639600   -9999.000000       1.000000
57485     57485     hubei          113.4300       30.3700          119       174     2012      06        28        180              0.441000      27.372803      16.676447       0.403093       0.484000       0.347200       0.119400   -9999.000000
57485     57485     hubei          113.4300       30.3700          119       174     2012      06        29        181              0.425167      27.133575       0.000000       0.406806       0.435000   -9999.000000       0.134800   -9999.000000
57485     57485     hubei          113.4300       30.3700          119       174     2012      06        30        182              0.399500      30.724365       0.630135       0.385126       0.401000       0.541700       0.151500   -9999.000000
57485     57485     hubei          113.4300       30.3700          119       174     2012      07        01        183              0.381318      29.637451       0.131496       0.374567   -9999.000000       0.310600   -9999.000000   -9999.000000
57485     57485     hubei          113.4300       30.3700          119       174     2012      07        02        184              0.369042      29.842285       0.000000       0.369647       0.500000   -9999.000000   -9999.000000       0.506000
57485     57485     hubei          113.4300       30.3700          119       174     2012      07        03        185              0.361667      30.902100       0.000000       0.361595       0.435000       0.399300       0.165000   -9999.000000
57485     57485     hubei          113.4300       30.3700          119       174     2012      07        04        186              0.355500      31.182953       0.000000       0.356987       0.443000   -9999.000000       0.162700       0.213000
57485     57485     hubei          113.4300       30.3700          119       174     2012      07        05        187              0.351375      30.907928       0.000000       0.354276       0.417000       0.365800       0.155700   -9999.000000
57485     57485     hubei          113.4300       30.3700          119       174     2012      07        06        188              0.351042      30.083679       0.608122       0.353552   -9999.000000       0.246000       0.202100   -9999.000000
57485     57485     hubei          113.4300       30.3700          119       174     2012      07        07        189              0.346792      32.122101       0.000000       0.349176   -9999.000000       0.293100   -9999.000000       0.161000
57485     57485     hubei          113.4300       30.3700          119       174     2012      07        08        190              0.343042      31.614502       0.000000       0.345165       0.499000       0.119700   -9999.000000   -9999.000000
57485     57485     hubei          113.4300       30.3700          119       174     2012      07        09        191              0.339500      31.704224       2.156256       0.340387       0.418000   -9999.000000       0.082100       0.225000
57485     57485     hubei          113.4300       30.3700          119       174     2012      07        10        192              0.337458      31.104279       0.000000       0.337091       0.428500       0.309800       0.098400   -9999.000000
57485     57485     hubei          113.4300       30.3700          119       174     2012      07        11        193              0.336750      31.797913       0.094756       0.334320       0.500000       0.397700       0.120900   -9999.000000
57485     57485     hubei          113.4300       30.3700          119       174     2012      07        12        194              0.391333      32.490845      28.651327       0.331302   -9999.000000   -9999.000000       0.117600       1.000000
57485     57485     hubei          113.4300       30.3700          119       174     2012      07        13        195              0.430167      28.983429      63.032600       0.382922   -9999.000000       0.504900   -9999.000000   -9999.000000
57485     57485     hubei          113.4300       30.3700          119       174     2012      07        14        196              0.430304      27.312164       0.235221       0.408059       0.498000   -9999.000000   -9999.000000       0.697000
57485     57485     hubei          113.4300       30.3700          119       174     2012      07        15        197              0.420750      28.990479       2.438906       0.374870       0.499000       0.278800       0.087600   -9999.000000
57485     57485     hubei          113.4300       30.3700          119       174     2012      07        16        198              0.399458      29.040253       0.689025       0.365784       0.500000       0.313700       0.261400       0.466000
57485     57485     hubei          113.4300       30.3700          119       174     2012      07        17        199              0.409167      29.553589       3.167134       0.362173   -9999.000000   -9999.000000       0.266300       0.720000
57485     57485     hubei          113.4300       30.3700          119       174     2012      07        18        200              0.414000      29.765106       1.269425       0.362808   -9999.000000       0.419400   -9999.000000   -9999.000000
57485     57485     hubei          113.4300       30.3700          119       174     2012      07        19        201              0.425375      30.067413      10.984566       0.358627       0.455000       0.239000   -9999.000000       0.623000
57485     57485     hubei          113.4300       30.3700          119       174     2012      07        20        202              0.415417      29.170593       0.312758       0.373186       0.483000       0.206800       0.177600   -9999.000000
57485     57485     hubei          113.4300       30.3700          119       174     2012      07        21        203              0.387565      31.278046       0.625563       0.359212       0.496000       0.301900       0.214400       0.239000
57485     57485     hubei          113.4300       30.3700          119       174     2012      07        22        204              0.372375      32.486298       0.480535       0.353396       0.500000   -9999.000000       0.252700   -9999.000000
57485     57485     hubei          113.4300       30.3700          119       174     2012      07        23        205              0.364000      31.657684       2.407531       0.352245   -9999.000000       0.402400       0.263900   -9999.000000
57485     57485     hubei          113.4300       30.3700          119       174     2012      07        24        206              0.359250      31.943390       0.000000       0.352364       0.500000       0.305800   -9999.000000       0.207000
57485     57485     hubei          113.4300       30.3700          119       174     2012      07        25        207              0.354708      32.467773       0.000000       0.346377       0.465500   -9999.000000   -9999.000000   -9999.000000
57485     57485     hubei          113.4300       30.3700          119       174     2012      07        26        208              0.350875      32.586700       0.000000       0.342040       0.476500       0.187700       0.177100       0.118000
57485     57485     hubei          113.4300       30.3700          119       174     2012      07        27        209              0.347292      32.502533       0.000000       0.338446       0.488000   -9999.000000       0.305600   -9999.000000
57485     57485     hubei          113.4300       30.3700          119       174     2012      07        28        210              0.343958      32.664673       0.509890       0.335322   -9999.000000       0.420800       0.305900       0.275000
57485     57485     hubei          113.4300       30.3700          119       174     2012      07        29        211              0.341333      32.633209       0.000000       0.332643       0.500000       0.256800       0.368200       0.179000
57485     57485     hubei          113.4300       30.3700          119       174     2012      07        30        212              0.339333      32.857544       0.827552       0.328846       0.448000   -9999.000000   -9999.000000   -9999.000000
57485     57485     hubei          113.4300       30.3700          119       174     2012      07        31        213              0.338000      33.033783       0.000000       0.325832       0.430000       0.172200   -9999.000000       0.101000
57485     57485     hubei          113.4300       30.3700          119       174     2012      08        01        214              0.334917      33.375580       0.965523       0.323931       0.500000   -9999.000000       0.212400   -9999.000000
57485     57485     hubei          113.4300       30.3700          119       174     2012      08        02        215              0.332000      32.052124       0.000000       0.324848   -9999.000000       0.179500       0.255000       0.248000
57485     57485     hubei          113.4300       30.3700          119       174     2012      08        03        216              0.331417      30.649445       4.347795       0.321201   -9999.000000       0.188900       0.287600   -9999.000000
57485     57485     hubei          113.4300       30.3700          119       174     2012      08        04        217              0.362125      30.251617      10.358859       0.323860   -9999.000000   -9999.000000   -9999.000000   -9999.000000
57485     57485     hubei          113.4300       30.3700          119       174     2012      08        05        218              0.373042      29.601807       0.101224       0.350331       0.500000       0.223400   -9999.000000       0.386000
57485     57485     hubei          113.4300       30.3700          119       174     2012      08        06        219              0.358500      31.338837       0.000000       0.341271   -9999.000000       0.234700       0.204200   -9999.000000
57485     57485     hubei          113.4300       30.3700          119       174     2012      08        07        220              0.351125      31.260468       0.000000       0.332213   -9999.000000       0.178600       0.249500       0.216000
57485     57485     hubei          113.4300       30.3700          119       174     2012      08        08        221              0.344292      31.230255       0.000000       0.326747   -9999.000000       0.228600       0.342700   -9999.000000
57485     57485     hubei          113.4300       30.3700          119       174     2012      08        09        222              0.338750      30.727936       1.560725       0.323084   -9999.000000   -9999.000000       0.294700   -9999.000000
57485     57485     hubei          113.4300       30.3700          119       174     2012      08        10        223              0.335792      30.329865       0.057715       0.319952       0.500000       0.276900   -9999.000000       0.405000
57485     57485     hubei          113.4300       30.3700          119       174     2012      08        11        224              0.336167      28.714539       1.022348       0.321701       0.500000       0.202300   -9999.000000   -9999.000000
57485     57485     hubei          113.4300       30.3700          119       174     2012      08        12        225              0.338583      29.829681       1.190156       0.323546       0.500000       0.279100       0.215000       0.243000
57485     57485     hubei          113.4300       30.3700          119       174     2012      08        13        226              0.336458      31.851776       2.813653       0.323454   -9999.000000       0.217800       0.358800   -9999.000000
57485     57485     hubei          113.4300       30.3700          119       174     2012      08        14        227              0.338375      30.131744       0.179645       0.324817   -9999.000000   -9999.000000       0.439300       0.210000
57485     57485     hubei          113.4300       30.3700          119       174     2012      08        15        228              0.337167      28.796326       0.000000       0.326504   -9999.000000       0.166900   -9999.000000       0.362000
57485     57485     hubei          113.4300       30.3700          119       174     2012      08        16        229              0.334667      30.540314       0.000000       0.320344       0.495000       0.278000   -9999.000000   -9999.000000
57485     57485     hubei          113.4300       30.3700          119       174     2012      08        17        230              0.338000      30.144287       1.799781       0.317502       0.500000   -9999.000000       0.345300       0.322000
57485     57485     hubei          113.4300       30.3700          119       174     2012      08        18        231              0.343583      31.638824       0.000000       0.319179   -9999.000000       0.166700       0.353500   -9999.000000
57485     57485     hubei          113.4300       30.3700          119       174     2012      08        19        232              0.340667      32.653503       0.000000       0.314444   -9999.000000   -9999.000000       0.381100       0.301000
57485     57485     hubei          113.4300       30.3700          119       174     2012      08        20        233              0.345833      32.782867      33.529831       0.309169   -9999.000000       0.159000       0.248400   -9999.000000
57485     57485     hubei          113.4300       30.3700          119       174     2012      08        21        234              0.428083      31.862335       3.605888       0.343714       0.500000       0.369700   -9999.000000   -9999.000000
57485     57485     hubei          113.4300       30.3700          119       174     2012      08        22        235              0.409958      25.731598       0.000000       0.388432       0.500000   -9999.000000   -9999.000000   -9999.000000
57485     57485     hubei          113.4300       30.3700          119       174     2012      08        23        236              0.397208      24.390930       4.141033       0.348866   -9999.000000       0.265600       0.200000   -9999.000000
57485     57485     hubei          113.4300       30.3700          119       174     2012      08        24        237              0.383000      24.508484       2.756603       0.342183   -9999.000000   -9999.000000       0.257000       0.314000
57485     57485     hubei          113.4300       30.3700          119       174     2012      08        25        238              0.000000      26.746643       0.000000       0.334820   -9999.000000       0.291300       0.263000   -9999.000000
57485     57485     hubei          113.4300       30.3700          119       174     2012      08        26        239              0.362125      28.503876       0.535465       0.328884       0.500000       0.348000       0.244800       0.578000
57485     57485     hubei          113.4300       30.3700          119       174     2012      08        27        240              0.357250      27.940094       0.000000       0.325604       0.500000   -9999.000000   -9999.000000       0.230000
57485     57485     hubei          113.4300       30.3700          119       174     2012      08        28        241              0.356375      27.131073       0.000000       0.324144       0.500000       0.382900   -9999.000000   -9999.000000
57485     57485     hubei          113.4300       30.3700          119       174     2012      08        29        242              0.355417      28.587616       0.566885       0.319796   -9999.000000       0.265500       0.146800       0.271000
57485     57485     hubei          113.4300       30.3700          119       174     2012      08        30        243              0.353333      29.980316       0.000000       0.315452   -9999.000000       0.161900       0.240900   -9999.000000
57485     57485     hubei          113.4300       30.3700          119       174     2012      08        31        244              0.351625      30.336548       0.000000       0.312266   -9999.000000       0.180800       0.233700       0.283000
57485     57485     hubei          113.4300       30.3700          119       174     2012      09        01        245              0.350083      31.294586       0.146552       0.308370       0.445500   -9999.000000   -9999.000000   -9999.000000
57485     57485     hubei          113.4300       30.3700          119       174     2012      09        02        246              0.347375      32.044952       0.769113       0.305058       0.491000       0.188200   -9999.000000   -9999.000000
57485     57485     hubei          113.4300       30.3700          119       174     2012      09        03        247              0.346375      26.273285       0.000000       0.308755       0.475000       0.157700       0.193200       0.253000
57485     57485     hubei          113.4300       30.3700          119       174     2012      09        04        248              0.345083      27.127655       0.000000       0.304469   -9999.000000   -9999.000000       0.209700   -9999.000000
57485     57485     hubei          113.4300       30.3700          119       174     2012      09        05        249              0.343625      26.877960       0.184391       0.301308       0.500000       0.120000       0.225900       0.145000
57485     57485     hubei          113.4300       30.3700          119       174     2012      09        06        250              0.342417      27.427399       0.000000       0.296431       0.427500   -9999.000000       0.232800   -9999.000000
57485     57485     hubei          113.4300       30.3700          119       174     2012      09        07        251              0.342083      28.111389       2.014090       0.294971       0.454500   -9999.000000   -9999.000000   -9999.000000
57485     57485     hubei          113.4300       30.3700          119       174     2012      09        08        252              0.401417      29.389404      52.056007       0.295421       0.500000       0.250400   -9999.000000       0.560000
57485     57485     hubei          113.4300       30.3700          119       174     2012      09        09        253              0.426583      26.311462       0.306970       0.385008   -9999.000000   -9999.000000       0.166300   -9999.000000
57485     57485     hubei          113.4300       30.3700          119       174     2012      09        10        254              0.418208      24.147186       0.972819       0.368596   -9999.000000       0.186000       0.255700       0.340000
57485     57485     hubei          113.4300       30.3700          119       174     2012      09        11        255              0.408667      26.646118       7.439096       0.350277       0.500000   -9999.000000       0.312400   -9999.000000
57485     57485     hubei          113.4300       30.3700          119       174     2012      09        12        256              0.428125      27.127289       9.992177       0.347660       0.457000   -9999.000000       0.283800       0.518000
57485     57485     hubei          113.4300       30.3700          119       174     2012      09        13        257              0.419435      22.694489       5.766956       0.366682   -9999.000000       0.243100   -9999.000000       0.559000
57485     57485     hubei          113.4300       30.3700          119       174     2012      09        14        258              0.405292      21.260803       0.177421       0.350284       0.457000   -9999.000000   -9999.000000   -9999.000000
57485     57485     hubei          113.4300       30.3700          119       174     2012      09        15        259              0.387417      22.923615       0.000000       0.339732   -9999.000000       0.167800       0.171700       0.232000
57485     57485     hubei          113.4300       30.3700          119       174     2012      09        16        260              0.375667      23.083710       0.152038       0.332905   -9999.000000       0.279600       0.268400   -9999.000000
57485     57485     hubei          113.4300       30.3700          119       174     2012      09        17        261              0.368458      22.993561       0.155606       0.329779       0.343000   -9999.000000       0.228000       0.360000
57485     57485     hubei          113.4300       30.3700          119       174     2012      09        18        262              0.365708      23.417542       0.000000       0.327059       0.367000       0.142500   -9999.000000   -9999.000000
57485     57485     hubei          113.4300       30.3700          119       174     2012      09        19        263              0.363750      24.330719       0.000000       0.323429       0.438000   -9999.000000   -9999.000000   -9999.000000
57485     57485     hubei          113.4300       30.3700          119       174     2012      09        20        264              0.362458      25.156830       1.654447       0.319496   -9999.000000       0.228600       0.236300       0.193000
57485     57485     hubei          113.4300       30.3700          119       174     2012      09        21        265              0.378708      26.505035       2.907981       0.320036   -9999.000000       0.388700       0.219800   -9999.000000
57485     57485     hubei          113.4300       30.3700          119       174     2012      09        22        266              0.373167      22.405212       3.179857       0.333739       0.426500   -9999.000000       0.207500       0.376000
57485     57485     hubei          113.4300       30.3700          119       174     2012      09        23        267              0.378875      25.316986       0.068218       0.328091       0.460500       0.261600       0.278300   -9999.000000
57485     57485     hubei          113.4300       30.3700          119       174     2012      09        24        268              0.374958      24.414520       0.000000       0.331979       0.457000   -9999.000000   -9999.000000       0.518000
57485     57485     hubei          113.4300       30.3700          119       174     2012      09        25        269              0.368292      25.277222       0.561825       0.326290       0.478000       0.377800   -9999.000000       0.673000
57485     57485     hubei          113.4300       30.3700          119       174     2012      09        26        270              0.362458      25.822968       0.000000       0.320490   -9999.000000       0.291700       0.160900   -9999.000000
57485     57485     hubei          113.4300       30.3700          119       174     2012      09        27        271              0.362071      24.285828       0.000000       0.320758       0.499000   -9999.000000       0.228000       0.274000
57485     57485     hubei          113.4300       30.3700          119       174     2012      09        28        272              0.351875      25.078461       0.273576       0.315617       0.342000   -9999.000000       0.308200   -9999.000000
57485     57485     hubei          113.4300       30.3700          119       174     2012      09        29        273              0.351542      21.546570       0.000000       0.308935       0.331000   -9999.000000       0.309200       0.329000
57485     57485     hubei          113.4300       30.3700          119       174     2012      09        30        274              0.350333      21.452820       0.000000       0.307476   -9999.000000   -9999.000000   -9999.000000   -9999.000000
57485     57485     hubei          113.4300       30.3700          119       174     2012      10        01        275              0.350583      20.404205       0.000000       0.309217   -9999.000000       0.262400   -9999.000000   -9999.000000
57485     57485     hubei          113.4300       30.3700          119       174     2012      10        02        276              0.350625      21.633301       0.269970       0.306048   -9999.000000   -9999.000000       0.112600       0.293000
57485     57485     hubei          113.4300       30.3700          119       174     2012      10        03        277              0.349208      22.868866       0.000000       0.304228       0.286000       0.254600       0.138500   -9999.000000
57485     57485     hubei          113.4300       30.3700          119       174     2012      10        04        278              0.349500      22.158844       0.987663       0.306197       0.287000       0.243700       0.176400       0.206000
57485     57485     hubei          113.4300       30.3700          119       174     2012      10        05        279              0.358375      22.856415       4.942193       0.306875       0.396000       0.210300   -9999.000000   -9999.000000
57485     57485     hubei          113.4300       30.3700          119       174     2012      10        06        280              0.363792      19.901306       0.243858       0.327264   -9999.000000       0.423200   -9999.000000   -9999.000000
57485     57485     hubei          113.4300       30.3700          119       174     2012      10        07        281              0.362750      22.518158       0.638124       0.319731   -9999.000000   -9999.000000       0.138200       0.472000
57485     57485     hubei          113.4300       30.3700          119       174     2012      10        08        282              0.361958      21.532318       0.342138       0.320829       0.494000       0.264000       0.140000   -9999.000000
57485     57485     hubei          113.4300       30.3700          119       174     2012      10        09        283              0.360542      21.836090       0.000000       0.318228       0.294000       0.238600       0.159700       0.177000
57485     57485     hubei          113.4300       30.3700          119       174     2012      10        10        284              0.360833      22.561676       0.213141       0.313690       0.378500   -9999.000000       0.159700   -9999.000000
57485     57485     hubei          113.4300       30.3700          119       174     2012      10        11        285              0.359583      22.623230       0.000000       0.309406       0.252000       0.517800   -9999.000000       0.399000
57485     57485     hubei          113.4300       30.3700          119       174     2012      10        12        286              0.357583      21.814117       0.341520       0.308263   -9999.000000   -9999.000000   -9999.000000       0.388000
57485     57485     hubei          113.4300       30.3700          119       174     2012      10        13        287              0.357042      20.141846       0.283781       0.310633       0.289000       0.259100       0.072700   -9999.000000
57485     57485     hubei          113.4300       30.3700          119       174     2012      10        14        288              0.358667      19.354248       4.890458       0.312433       0.269000       0.342300       0.155400       0.004000
57485     57485     hubei          113.4300       30.3700          119       174     2012      10        15        289              0.379958      20.459045       7.384199       0.320301       0.303000   -9999.000000       0.210100   -9999.000000
57485     57485     hubei          113.4300       30.3700          119       174     2012      10        16        290              0.430750      19.990936      25.181856       0.342917       0.349000       0.186600   -9999.000000       0.932000
57485     57485     hubei          113.4300       30.3700          119       174     2012      10        17        291              0.413708      17.812622       0.000000       0.378813   -9999.000000   -9999.000000   -9999.000000   -9999.000000
57485     57485     hubei          113.4300       30.3700          119       174     2012      10        18        292              0.402750      18.144470       0.000000       0.349106   -9999.000000       0.167100       0.161700   -9999.000000
57485     57485     hubei          113.4300       30.3700          119       174     2012      10        19        293              0.393750      19.301178       0.000000       0.340687       0.281000       0.365400       0.180900       0.354000
57485     57485     hubei          113.4300       30.3700          119       174     2012      10        20        294              0.389458      20.680328       1.672058       0.336508       0.274000   -9999.000000       0.187200   -9999.000000
57485     57485     hubei          113.4300       30.3700          119       174     2012      10        21        295              0.400208      22.969879      16.753769       0.336653       0.318500       0.348600       0.237100       0.346000
57485     57485     hubei          113.4300       30.3700          119       174     2012      10        22        296              0.421667      23.045959       0.265727       0.353481   -9999.000000       0.380700   -9999.000000   -9999.000000
57485     57485     hubei          113.4300       30.3700          119       174     2012      10        23        297              0.411042      16.431824       1.092457       0.353271   -9999.000000       0.245000   -9999.000000       0.539000
57485     57485     hubei          113.4300       30.3700          119       174     2012      10        24        298              0.413375      18.307312       1.403296       0.343513   -9999.000000       0.389600       0.152300       0.853000
57485     57485     hubei          113.4300       30.3700          119       174     2012      10        25        299              0.000000      16.102234       9.491531       0.345753       0.283000   -9999.000000       0.175900   -9999.000000
57485     57485     hubei          113.4300       30.3700          119       174     2012      10        26        300              0.432792      16.704132      21.367535       0.358205       0.372000       0.506500       0.198200       1.000000
57485     57485     hubei          113.4300       30.3700          119       174     2012      10        27        301              0.423250      16.185364       0.169478       0.380729   -9999.000000       0.577800       0.205200   -9999.000000
57485     57485     hubei          113.4300       30.3700          119       174     2012      10        28        302              0.000000      18.619507      13.606668       0.357974   -9999.000000       0.192300   -9999.000000       0.732000
57485     57485     hubei          113.4300       30.3700          119       174     2012      10        29        303              0.429667      20.276520      21.674652       0.359383   -9999.000000       0.627500   -9999.000000   -9999.000000
57485     57485     hubei          113.4300       30.3700          119       174     2012      10        30        304              0.421417      16.890808       0.000000       0.387859   -9999.000000   -9999.000000       0.134400   -9999.000000
57485     57485     hubei          113.4300       30.3700          119       174     2012      10        31        305              0.415391      16.545349       2.345088       0.361577   -9999.000000       0.351900       0.181400       0.702000
57485     57485     hubei          113.4300       30.3700          119       174     2012      11        01        306              0.410083      16.712097       0.000000       0.352431   -9999.000000       0.467800       0.203000   -9999.000000
57485     57485     hubei          113.4300       30.3700          119       174     2012      11        02        307              0.404000      16.020966       0.100225       0.347710   -9999.000000   -9999.000000   -9999.000000       0.585000
57485     57485     hubei          113.4300       30.3700          119       174     2012      11        03        308              0.413000      17.538269       7.574263       0.343288   -9999.000000       0.310500   -9999.000000   -9999.000000
57485     57485     hubei          113.4300       30.3700          119       174     2012      11        04        309              0.408739      12.805420       0.000000       0.358729   -9999.000000   -9999.000000       0.175400   -9999.000000
57485     57485     hubei          113.4300       30.3700          119       174     2012      11        05        310              0.401250      13.893005       0.000000       0.346862   -9999.000000   -9999.000000       0.142800       0.617000
57485     57485     hubei          113.4300       30.3700          119       174     2012      11        06        311              0.394875      12.950592       0.128808       0.343023   -9999.000000       0.395300       0.153000   -9999.000000
57485     57485     hubei          113.4300       30.3700          119       174     2012      11        07        312              0.390708      13.464935       0.000000       0.340339   -9999.000000   -9999.000000       0.215700       0.462000
57485     57485     hubei          113.4300       30.3700          119       174     2012      11        08        313              0.392792      13.422394       1.728181       0.340496   -9999.000000       0.342200   -9999.000000   -9999.000000
57485     57485     hubei          113.4300       30.3700          119       174     2012      11        09        314              0.405542      13.277466       2.150981       0.342981   -9999.000000       0.247500   -9999.000000       0.806000
57485     57485     hubei          113.4300       30.3700          119       174     2012      11        10        315              0.402750      11.552307       0.545163       0.349762   -9999.000000       0.122000       0.102600       0.658000
57485     57485     hubei          113.4300       30.3700          119       174     2012      11        11        316              0.396792      11.874512       0.000000       0.345119   -9999.000000       0.334700       0.155700   -9999.000000
57485     57485     hubei          113.4300       30.3700          119       174     2012      11        12        317              0.391667      12.175446       0.000000       0.341248   -9999.000000   -9999.000000       0.174100       0.452000
57485     57485     hubei          113.4300       30.3700          119       174     2012      11        13        318              0.000000      13.378265       0.134790       0.339566   -9999.000000       0.231500       0.160500   -9999.000000
57485     57485     hubei          113.4300       30.3700          119       174     2012      11        14        319              0.385083      15.090210       0.447580       0.338647   -9999.000000       0.296500   -9999.000000       0.483000
57485     57485     hubei          113.4300       30.3700          119       174     2012      11        15        320              0.395500      15.095154       4.418787       0.338037   -9999.000000       0.266100   -9999.000000   -9999.000000
57485     57485     hubei          113.4300       30.3700          119       174     2012      11        16        321              0.408417      10.303345       3.595979       0.349804   -9999.000000       0.381200       0.108000   -9999.000000
57485     57485     hubei          113.4300       30.3700          119       174     2012      11        17        322              0.000000       9.703796       0.000000       0.353228   -9999.000000   -9999.000000       0.146400       0.506000
57485     57485     hubei          113.4300       30.3700          119       174     2012      11        18        323              0.398083      11.445465       0.931253       0.345438   -9999.000000       0.371100       0.190500   -9999.000000
57485     57485     hubei          113.4300       30.3700          119       174     2012      11        19        324              0.393542      12.372772       0.000000       0.342810   -9999.000000       0.223000   -9999.000000       0.533000
57485     57485     hubei          113.4300       30.3700          119       174     2012      11        20        325              0.402583      13.176208       4.142026       0.341157   -9999.000000   -9999.000000   -9999.000000   -9999.000000
57485     57485     hubei          113.4300       30.3700          119       174     2012      11        21        326              0.410875      12.868439       0.170564       0.349508   -9999.000000       0.466500       0.127200       0.819000
57485     57485     hubei          113.4300       30.3700          119       174     2012      11        22        327              0.423375      11.383179      11.070734       0.347157   -9999.000000   -9999.000000       0.113400       1.000000
57485     57485     hubei          113.4300       30.3700          119       174     2012      11        23        328              0.411292      10.611328       0.000000       0.366191   -9999.000000       0.351400       0.148400   -9999.000000
57485     57485     hubei          113.4300       30.3700          119       174     2012      11        24        329              0.409000       8.758575       0.631319       0.353055   -9999.000000       0.331200       0.164400       0.628000
57485     57485     hubei          113.4300       30.3700          119       174     2012      11        25        330              0.409958       9.743256       0.045160       0.349821   -9999.000000   -9999.000000   -9999.000000   -9999.000000
57485     57485     hubei          113.4300       30.3700          119       174     2012      11        26        331              0.403792       8.253723       0.000000       0.348438   -9999.000000       0.334700   -9999.000000       0.500000
57485     57485     hubei          113.4300       30.3700          119       174     2012      11        27        332              0.400208       9.559998       0.297368       0.344404   -9999.000000       0.236900       0.080200   -9999.000000
57485     57485     hubei          113.4300       30.3700          119       174     2012      11        28        333              0.395750      10.391174       0.000000       0.343401   -9999.000000       0.271600       0.166100   -9999.000000
57485     57485     hubei          113.4300       30.3700          119       174     2012      11        29        334              0.402167      10.109741       3.401543       0.342699   -9999.000000       0.251500       0.184300       0.980000
57485     57485     hubei          113.4300       30.3700          119       174     2012      11        30        335              0.406458      10.072174       0.322209       0.348714   -9999.000000   -9999.000000       0.184300   -9999.000000
57485     57485     hubei          113.4300       30.3700          119       174     2012      12        01        336              0.411958      10.478088       3.663447       0.346545   -9999.000000       0.348200   -9999.000000       0.797000
57485     57485     hubei          113.4300       30.3700          119       174     2012      12        02        337              0.408708       6.636810       0.000000       0.353210   -9999.000000       0.293000   -9999.000000   -9999.000000
57485     57485     hubei          113.4300       30.3700          119       174     2012      12        03        338              0.406500       5.372345       0.000000       0.347975   -9999.000000       0.265200       0.136700   -9999.000000
57485     57485     hubei          113.4300       30.3700          119       174     2012      12        04        339              0.403583       7.957550       0.000000       0.345376   -9999.000000       0.373400       0.161700       0.572000
57485     57485     hubei          113.4300       30.3700          119       174     2012      12        05        340              0.399000       7.108368       0.000000       0.344559   -9999.000000   -9999.000000       0.196300   -9999.000000
57485     57485     hubei          113.4300       30.3700          119       174     2012      12        06        341              0.394917       8.970612       0.000000       0.342461   -9999.000000       0.332800   -9999.000000       0.421000
57485     57485     hubei          113.4300       30.3700          119       174     2012      12        07        342              0.391792       8.985107       0.000000       0.342228   -9999.000000       0.277100   -9999.000000   -9999.000000
57485     57485     hubei          113.4300       30.3700          119       174     2012      12        08        343              0.386292       9.849701       0.000000       0.340965   -9999.000000   -9999.000000       0.120200       0.432000
57485     57485     hubei          113.4300       30.3700          119       174     2012      12        09        344              0.379583       8.816620       0.380394       0.339403   -9999.000000       0.272200       0.149400       0.295000
57485     57485     hubei          113.4300       30.3700          119       174     2012      12        10        345              0.383458       7.394165       2.225282       0.338831   -9999.000000   -9999.000000       0.139100   -9999.000000
57485     57485     hubei          113.4300       30.3700          119       174     2012      12        11        346              0.385333       5.765045       0.000000       0.344999   -9999.000000   -9999.000000       0.146900       0.439000
57485     57485     hubei          113.4300       30.3700          119       174     2012      12        12        347              0.383250       6.522644       1.008743       0.342682   -9999.000000       0.249300   -9999.000000   -9999.000000
57485     57485     hubei          113.4300       30.3700          119       174     2012      12        13        348              0.408250       7.777374      11.042681       0.342711   -9999.000000   -9999.000000   -9999.000000       0.854000
57485     57485     hubei          113.4300       30.3700          119       174     2012      12        14        349              0.417583       6.892883       5.050150       0.366356   -9999.000000       0.347300       0.071800   -9999.000000
57485     57485     hubei          113.4300       30.3700          119       174     2012      12        15        350              0.000000       5.055023       0.110521       0.361662   -9999.000000       0.179200       0.140400   -9999.000000
57485     57485     hubei          113.4300       30.3700          119       174     2012      12        16        351              0.409042       6.027313       0.038648       0.354259   -9999.000000       0.312200       0.171200       0.650000
57485     57485     hubei          113.4300       30.3700          119       174     2012      12        17        352              0.420958       5.967560      14.768884       0.350391   -9999.000000       0.271600   -9999.000000   -9999.000000
57485     57485     hubei          113.4300       30.3700          119       174     2012      12        18        353              0.424125       4.937744       0.000000       0.370269   -9999.000000   -9999.000000   -9999.000000       0.620000
57485     57485     hubei          113.4300       30.3700          119       174     2012      12        19        354              0.415833       4.508057       0.381220       0.358018   -9999.000000   -9999.000000       0.157900   -9999.000000
57485     57485     hubei          113.4300       30.3700          119       174     2012      12        20        355              0.000000       5.309784       1.940042       0.353329   -9999.000000       0.297100       0.142800       0.858000
57485     57485     hubei          113.4300       30.3700          119       174     2012      12        21        356              0.412083       2.369080       0.000000       0.353405   -9999.000000       0.214800       0.149600       0.676000
57485     57485     hubei          113.4300       30.3700          119       174     2012      12        22        357              0.406625       3.106201       0.236429       0.349377   -9999.000000       0.428700       0.139300   -9999.000000
57485     57485     hubei          113.4300       30.3700          119       174     2012      12        23        358              0.397625       3.131561       0.000000       0.342938   -9999.000000   -9999.000000   -9999.000000       0.161000
57485     57485     hubei          113.4300       30.3700          119       174     2012      12        24        359              0.394000       3.063446       0.000000       0.333626   -9999.000000       0.321200   -9999.000000   -9999.000000
57485     57485     hubei          113.4300       30.3700          119       174     2012      12        25        360              0.392333       4.698273       0.000000       0.342888   -9999.000000       0.399700       0.082600       0.336000
57485     57485     hubei          113.4300       30.3700          119       174     2012      12        26        361              0.000000       2.629761       0.102297       0.340067   -9999.000000   -9999.000000       0.138400   -9999.000000
57485     57485     hubei          113.4300       30.3700          119       174     2012      12        27        362              0.408818       1.324219       1.945461       0.323043   -9999.000000       0.192200       0.137600   -9999.000000
57485     57485     hubei          113.4300       30.3700          119       174     2012      12        28        363              0.408000       1.283997       8.562041       0.328086   -9999.000000   -9999.000000       0.194400       0.792000
57485     57485     hubei          113.4300       30.3700          119       174     2012      12        29        364              0.000000       2.095520       4.687592       0.346297   -9999.000000   -9999.000000   -9999.000000   -9999.000000
57485     57485     hubei          113.4300       30.3700          119       174     2012      12        30        365              0.000000       1.348389       0.544220       0.341652   -9999.000000       0.225100   -9999.000000       0.182000
57485     57485     hubei          113.4300       30.3700          119       174     2012      12        31        366              0.402400       2.199921       1.283098       0.326045   -9999.000000   -9999.000000       0.072200   -9999.000000
