# Supplementary material for: Research on Fusing Multisatellite Soil Moisture Data Based on Bayesian Model Averaging
Source: Hindawi journal article supplement (doi:10.1155/2018/9310838), 2018-06-25
Supplement: f1 [file 9310838.f1.zip › 2012_sm00-10cm_daily_ZDB_ZHY_57491_366days_allin.txt]

57491     57491     hubei          114.2397       30.5200          118       177     2012      01        01        001              0.000000   -9999.000000       0.000000   -9999.000000   -9999.000000   -9999.000000       0.101900   -9999.000000
57491     57491     hubei          114.2397       30.5200          118       177     2012      01        02        002              0.000000       4.973328       0.000000       0.348586   -9999.000000   -9999.000000       0.109100   -9999.000000
57491     57491     hubei          114.2397       30.5200          118       177     2012      01        03        003              0.000000       5.108795       0.000000       0.352956   -9999.000000   -9999.000000   -9999.000000       0.463000
57491     57491     hubei          114.2397       30.5200          118       177     2012      01        04        004              0.000000       2.687836       0.000000       0.332782   -9999.000000   -9999.000000   -9999.000000   -9999.000000
57491     57491     hubei          114.2397       30.5200          118       177     2012      01        05        005              0.000000       3.607452       0.000000       0.340418   -9999.000000   -9999.000000       0.029600       0.125000
57491     57491     hubei          114.2397       30.5200          118       177     2012      01        06        006              0.000000       2.837524       0.000000       0.339894   -9999.000000   -9999.000000       0.102700   -9999.000000
57491     57491     hubei          114.2397       30.5200          118       177     2012      01        07        007              0.000000       4.937714       0.000000       0.344627   -9999.000000   -9999.000000       0.119600   -9999.000000
57491     57491     hubei          114.2397       30.5200          118       177     2012      01        08        008              0.000000       2.838257       0.000000       0.346281   -9999.000000   -9999.000000       0.106700       0.080000
57491     57491     hubei          114.2397       30.5200          118       177     2012      01        09        009              0.000000       3.753082       0.000000       0.348132   -9999.000000   -9999.000000   -9999.000000   -9999.000000
57491     57491     hubei          114.2397       30.5200          118       177     2012      01        10        010              0.000000       5.789734       0.000000       0.348046   -9999.000000   -9999.000000       0.093800       0.402000
57491     57491     hubei          114.2397       30.5200          118       177     2012      01        11        011              0.000000       5.930084       0.000000       0.347253   -9999.000000   -9999.000000       0.075400   -9999.000000
57491     57491     hubei          114.2397       30.5200          118       177     2012      01        12        012              0.000000       4.268524       0.204315       0.347526   -9999.000000   -9999.000000       0.103700       0.370000
57491     57491     hubei          114.2397       30.5200          118       177     2012      01        13        013              0.000000       4.489899       8.747206       0.347973   -9999.000000       0.012800       0.106800       0.556000
57491     57491     hubei          114.2397       30.5200          118       177     2012      01        14        014              0.000000       4.377594       1.119293       0.358964   -9999.000000   -9999.000000   -9999.000000   -9999.000000
57491     57491     hubei          114.2397       30.5200          118       177     2012      01        15        015              0.000000       3.886047       0.092479       0.363384   -9999.000000   -9999.000000   -9999.000000       1.000000
57491     57491     hubei          114.2397       30.5200          118       177     2012      01        16        016              0.000000       3.687897       0.000000       0.356892   -9999.000000   -9999.000000       0.064300   -9999.000000
57491     57491     hubei          114.2397       30.5200          118       177     2012      01        17        017              0.000000       5.373688       1.100957       0.354228   -9999.000000   -9999.000000       0.105100       1.000000
57491     57491     hubei          114.2397       30.5200          118       177     2012      01        18        018              0.000000       5.482727       1.559377       0.355325   -9999.000000   -9999.000000       0.108800   -9999.000000
57491     57491     hubei          114.2397       30.5200          118       177     2012      01        19        019              0.000000       5.419708       0.340801       0.356938   -9999.000000   -9999.000000       0.104000   -9999.000000
57491     57491     hubei          114.2397       30.5200          118       177     2012      01        20        020              0.000000       5.558807       5.608370       0.353900   -9999.000000   -9999.000000   -9999.000000       1.000000
57491     57491     hubei          114.2397       30.5200          118       177     2012      01        21        021              0.000000       4.615509       0.975407       0.364266   -9999.000000   -9999.000000   -9999.000000   -9999.000000
57491     57491     hubei          114.2397       30.5200          118       177     2012      01        22        022              0.000000       2.030548       2.101281       0.340032   -9999.000000   -9999.000000       0.023400       0.453000
57491     57491     hubei          114.2397       30.5200          118       177     2012      01        23        023              0.000000       1.472168       1.083307       0.312339   -9999.000000   -9999.000000       0.104000   -9999.000000
57491     57491     hubei          114.2397       30.5200          118       177     2012      01        24        024              0.000000       1.984528       1.230485       0.328117   -9999.000000   -9999.000000   -9999.000000   -9999.000000
57491     57491     hubei          114.2397       30.5200          118       177     2012      01        25        025              0.000000       3.224884       0.000000       0.325264   -9999.000000   -9999.000000   -9999.000000       0.841000
57491     57491     hubei          114.2397       30.5200          118       177     2012      01        26        026              0.000000       3.599335       0.000000       0.329449   -9999.000000   -9999.000000   -9999.000000   -9999.000000
57491     57491     hubei          114.2397       30.5200          118       177     2012      01        27        027              0.000000       5.214569       0.000000       0.346281   -9999.000000   -9999.000000       0.101000       0.657000
57491     57491     hubei          114.2397       30.5200          118       177     2012      01        28        028              0.000000       3.898560       0.000000       0.349749   -9999.000000   -9999.000000       0.080700   -9999.000000
57491     57491     hubei          114.2397       30.5200          118       177     2012      01        29        029              0.000000       5.472198       0.911017       0.349185   -9999.000000   -9999.000000       0.102300       1.000000
57491     57491     hubei          114.2397       30.5200          118       177     2012      01        30        030              0.000000       5.221252       2.681232       0.351304   -9999.000000   -9999.000000       0.102300       1.000000
57491     57491     hubei          114.2397       30.5200          118       177     2012      01        31        031              0.000000       4.563416       0.000000       0.350390   -9999.000000   -9999.000000   -9999.000000   -9999.000000
57491     57491     hubei          114.2397       30.5200          118       177     2012      02        01        032              0.000000       6.829407       0.000000       0.348761   -9999.000000   -9999.000000   -9999.000000       0.284000
57491     57491     hubei          114.2397       30.5200          118       177     2012      02        02        033              0.000000       5.409637       0.000000       0.348086   -9999.000000   -9999.000000       0.036300   -9999.000000
57491     57491     hubei          114.2397       30.5200          118       177     2012      02        03        034              0.000000       3.431702       0.000000       0.339877   -9999.000000   -9999.000000       0.094600       0.281000
57491     57491     hubei          114.2397       30.5200          118       177     2012      02        04        035              0.000000       5.712982       0.000000       0.344608   -9999.000000   -9999.000000       0.089100   -9999.000000
57491     57491     hubei          114.2397       30.5200          118       177     2012      02        05        036              0.000000       4.243317      10.139040       0.347183   -9999.000000       0.069200       0.120400   -9999.000000
57491     57491     hubei          114.2397       30.5200          118       177     2012      02        06        037              0.000000       5.386566       0.099804       0.365263   -9999.000000   -9999.000000   -9999.000000       0.705000
57491     57491     hubei          114.2397       30.5200          118       177     2012      02        07        038              0.000000       5.858002       0.000000       0.359418   -9999.000000   -9999.000000   -9999.000000   -9999.000000
57491     57491     hubei          114.2397       30.5200          118       177     2012      02        08        039              0.000000       4.713989       0.000000       0.349123   -9999.000000   -9999.000000       0.025800       0.302000
57491     57491     hubei          114.2397       30.5200          118       177     2012      02        09        040              0.000000       4.861969       0.000000       0.348294   -9999.000000   -9999.000000       0.089900   -9999.000000
57491     57491     hubei          114.2397       30.5200          118       177     2012      02        10        041              0.000000       2.729156       0.000000       0.343105   -9999.000000   -9999.000000       0.094300       0.697000
57491     57491     hubei          114.2397       30.5200          118       177     2012      02        11        042              0.000000       5.058319       0.000000       0.345227   -9999.000000   -9999.000000   -9999.000000       0.120000
57491     57491     hubei          114.2397       30.5200          118       177     2012      02        12        043              0.000000       7.210480       1.108381       0.346237   -9999.000000   -9999.000000   -9999.000000   -9999.000000
57491     57491     hubei          114.2397       30.5200          118       177     2012      02        13        044              0.000000       5.865540       0.640633       0.348640   -9999.000000       0.021700   -9999.000000       0.305000
57491     57491     hubei          114.2397       30.5200          118       177     2012      02        14        045              0.000000       5.166443       6.856725       0.350710   -9999.000000   -9999.000000       0.100300   -9999.000000
57491     57491     hubei          114.2397       30.5200          118       177     2012      02        15        046              0.000000       4.779022       1.830608       0.362266   -9999.000000   -9999.000000       0.108500       1.000000
57491     57491     hubei          114.2397       30.5200          118       177     2012      02        16        047              0.000000       4.731018       0.000000       0.360877   -9999.000000   -9999.000000       0.106500   -9999.000000
57491     57491     hubei          114.2397       30.5200          118       177     2012      02        17        048              0.000000       6.377441       0.000000       0.355219   -9999.000000   -9999.000000   -9999.000000   -9999.000000
57491     57491     hubei          114.2397       30.5200          118       177     2012      02        18        049              0.000000       7.088531       0.000000       0.351109   -9999.000000       0.050500   -9999.000000       1.000000
57491     57491     hubei          114.2397       30.5200          118       177     2012      02        19        050              0.000000       7.304810       0.000000       0.348149   -9999.000000   -9999.000000       0.034600   -9999.000000
57491     57491     hubei          114.2397       30.5200          118       177     2012      02        20        051              0.000000       8.582458       0.122134       0.345807   -9999.000000   -9999.000000       0.090800       0.831000
57491     57491     hubei          114.2397       30.5200          118       177     2012      02        21        052              0.000000       7.259491       4.781813       0.347104   -9999.000000   -9999.000000   -9999.000000   -9999.000000
57491     57491     hubei          114.2397       30.5200          118       177     2012      02        22        053              0.000000       8.326172      19.568890       0.356118   -9999.000000   -9999.000000       0.107800   -9999.000000
57491     57491     hubei          114.2397       30.5200          118       177     2012      02        23        054              0.000000       8.746765       0.463209       0.384446   -9999.000000       0.076100   -9999.000000       1.000000
57491     57491     hubei          114.2397       30.5200          118       177     2012      02        24        055              0.000000       8.020691       0.000000       0.365050   -9999.000000   -9999.000000   -9999.000000   -9999.000000
57491     57491     hubei          114.2397       30.5200          118       177     2012      02        25        056              0.000000       5.642944       0.125346       0.359359   -9999.000000   -9999.000000       0.039100       0.695000
57491     57491     hubei          114.2397       30.5200          118       177     2012      02        26        057              0.000000       4.982361       0.000000       0.356247   -9999.000000   -9999.000000       0.090600   -9999.000000
57491     57491     hubei          114.2397       30.5200          118       177     2012      02        27        058              0.000000       6.755463       0.000000       0.353222   -9999.000000   -9999.000000   -9999.000000       0.270000
57491     57491     hubei          114.2397       30.5200          118       177     2012      02        28        059              0.000000       6.715973       0.227715       0.352024   -9999.000000       0.024500   -9999.000000       0.636000
57491     57491     hubei          114.2397       30.5200          118       177     2012      02        29        060              0.000000   -9999.000000       0.000000   -9999.000000   -9999.000000   -9999.000000   -9999.000000   -9999.000000
57491     57491     hubei          114.2397       30.5200          118       177     2012      03        01        061              0.000000       9.046906       0.085246       0.349811   -9999.000000   -9999.000000       0.092100       0.735000
57491     57491     hubei          114.2397       30.5200          118       177     2012      03        02        062              0.000000       8.238678       9.549116       0.350352   -9999.000000   -9999.000000       0.102800   -9999.000000
57491     57491     hubei          114.2397       30.5200          118       177     2012      03        03        063              0.000000       8.154114      10.833658       0.358239   -9999.000000   -9999.000000       0.113100       1.000000
57491     57491     hubei          114.2397       30.5200          118       177     2012      03        04        064              0.000000       7.116730       2.439052       0.375167   -9999.000000       0.105000       0.122700   -9999.000000
57491     57491     hubei          114.2397       30.5200          118       177     2012      03        05        065              0.000000       5.424255       0.000000       0.371982   -9999.000000   -9999.000000   -9999.000000   -9999.000000
57491     57491     hubei          114.2397       30.5200          118       177     2012      03        06        066              0.000000       7.092682       4.170162       0.362154   -9999.000000   -9999.000000   -9999.000000       0.713000
57491     57491     hubei          114.2397       30.5200          118       177     2012      03        07        067              0.000000       8.266602       8.344194       0.363971   -9999.000000   -9999.000000       0.053600   -9999.000000
57491     57491     hubei          114.2397       30.5200          118       177     2012      03        08        068              0.000000       7.552704       4.051498       0.374513   -9999.000000   -9999.000000       0.105600       0.947000
57491     57491     hubei          114.2397       30.5200          118       177     2012      03        09        069              0.000000       6.664215       0.000000       0.372984   -9999.000000   -9999.000000       0.093400   -9999.000000
57491     57491     hubei          114.2397       30.5200          118       177     2012      03        10        070              0.000000       7.465759       0.000000       0.363422   -9999.000000   -9999.000000       0.108100       0.979000
57491     57491     hubei          114.2397       30.5200          118       177     2012      03        11        071              0.000000      10.210480       0.000000       0.359040   -9999.000000   -9999.000000   -9999.000000       0.687000
57491     57491     hubei          114.2397       30.5200          118       177     2012      03        12        072              0.000000       9.634521       0.000000       0.357511   -9999.000000       0.052500   -9999.000000   -9999.000000
57491     57491     hubei          114.2397       30.5200          118       177     2012      03        13        073              0.000000      11.179291       0.000000       0.355361   -9999.000000   -9999.000000       0.046700       0.735000
57491     57491     hubei          114.2397       30.5200          118       177     2012      03        14        074              0.000000      13.421173       3.033824       0.352956   -9999.000000   -9999.000000       0.117600   -9999.000000
57491     57491     hubei          114.2397       30.5200          118       177     2012      03        15        075              0.000000      15.315002       3.279211       0.353747   -9999.000000   -9999.000000       0.127900       1.000000
57491     57491     hubei          114.2397       30.5200          118       177     2012      03        16        076              0.000000      12.482269       0.121541       0.365229   -9999.000000   -9999.000000   -9999.000000   -9999.000000
57491     57491     hubei          114.2397       30.5200          118       177     2012      03        17        077              0.000000      11.198303       1.124280       0.358744   -9999.000000   -9999.000000   -9999.000000   -9999.000000
57491     57491     hubei          114.2397       30.5200          118       177     2012      03        18        078              0.000000      12.120605       0.261412       0.359484   -9999.000000   -9999.000000       0.085100       1.000000
57491     57491     hubei          114.2397       30.5200          118       177     2012      03        19        079              0.000000      16.195923       1.071605       0.354741   -9999.000000   -9999.000000       0.114800   -9999.000000
57491     57491     hubei          114.2397       30.5200          118       177     2012      03        20        080              0.000000       9.308380       0.270182       0.356171   -9999.000000   -9999.000000       0.126000       0.639000
57491     57491     hubei          114.2397       30.5200          118       177     2012      03        21        081              0.000000       9.001709      12.592146       0.356180       0.332000   -9999.000000       0.139600   -9999.000000
57491     57491     hubei          114.2397       30.5200          118       177     2012      03        22        082              0.000000      11.565918      41.904709       0.365775   -9999.000000   -9999.000000   -9999.000000   -9999.000000
57491     57491     hubei          114.2397       30.5200          118       177     2012      03        23        083              0.000000       8.113556       0.432424       0.405553   -9999.000000   -9999.000000   -9999.000000       0.946000
57491     57491     hubei          114.2397       30.5200          118       177     2012      03        24        084              0.000000      12.542999       0.000000       0.377308   -9999.000000   -9999.000000   -9999.000000   -9999.000000
57491     57491     hubei          114.2397       30.5200          118       177     2012      03        25        085              0.000000      14.951843       0.000000       0.366611   -9999.000000   -9999.000000       0.122000       0.458000
57491     57491     hubei          114.2397       30.5200          118       177     2012      03        26        086              0.000000      17.040497       0.156872       0.362102   -9999.000000   -9999.000000       0.136100   -9999.000000
57491     57491     hubei          114.2397       30.5200          118       177     2012      03        27        087              0.000000      18.981537       2.657122       0.358645   -9999.000000   -9999.000000       0.158400       0.291000
57491     57491     hubei          114.2397       30.5200          118       177     2012      03        28        088              0.000000      20.373657       0.252258       0.356515   -9999.000000   -9999.000000   -9999.000000       0.786000
57491     57491     hubei          114.2397       30.5200          118       177     2012      03        29        089              0.000000      20.762726      11.434108       0.355086   -9999.000000   -9999.000000   -9999.000000   -9999.000000
57491     57491     hubei          114.2397       30.5200          118       177     2012      03        30        090              0.000000      18.349640       4.103073       0.369150   -9999.000000   -9999.000000       0.109100       0.699000
57491     57491     hubei          114.2397       30.5200          118       177     2012      03        31        091              0.000000      15.913757       0.000000       0.376018   -9999.000000   -9999.000000       0.146700   -9999.000000
57491     57491     hubei          114.2397       30.5200          118       177     2012      04        01        092              0.000000      18.069092       0.000000       0.361159   -9999.000000   -9999.000000       0.154100       0.610000
57491     57491     hubei          114.2397       30.5200          118       177     2012      04        02        093              0.000000      20.212738       0.000000       0.355965   -9999.000000   -9999.000000   -9999.000000   -9999.000000
57491     57491     hubei          114.2397       30.5200          118       177     2012      04        03        094              0.000000      20.103119       1.971012       0.352200   -9999.000000   -9999.000000   -9999.000000   -9999.000000
57491     57491     hubei          114.2397       30.5200          118       177     2012      04        04        095              0.000000      17.987915       8.745476       0.351433   -9999.000000   -9999.000000       0.117900       0.550000
57491     57491     hubei          114.2397       30.5200          118       177     2012      04        05        096              0.000000      14.680298       0.241856       0.371372   -9999.000000   -9999.000000       0.128400   -9999.000000
57491     57491     hubei          114.2397       30.5200          118       177     2012      04        06        097              0.000000      18.051361       0.215272       0.360409   -9999.000000   -9999.000000       0.141800       0.289000
57491     57491     hubei          114.2397       30.5200          118       177     2012      04        07        098              0.000000      20.830322       0.206978       0.355087   -9999.000000   -9999.000000       0.143500   -9999.000000
57491     57491     hubei          114.2397       30.5200          118       177     2012      04        08        099              0.000000      21.961426       0.199947       0.350996   -9999.000000   -9999.000000   -9999.000000       0.617000
57491     57491     hubei          114.2397       30.5200          118       177     2012      04        09        100              0.000000      20.191498       4.824895       0.350685   -9999.000000   -9999.000000   -9999.000000       1.000000
57491     57491     hubei          114.2397       30.5200          118       177     2012      04        10        101              0.000000      18.836792      10.405845       0.362691   -9999.000000   -9999.000000       0.042200   -9999.000000
57491     57491     hubei          114.2397       30.5200          118       177     2012      04        11        102              0.000000      20.072571       0.692365       0.373092   -9999.000000   -9999.000000       0.132600       0.973000
57491     57491     hubei          114.2397       30.5200          118       177     2012      04        12        103              0.000000      21.436340      10.706300       0.362380   -9999.000000   -9999.000000       0.154700   -9999.000000
57491     57491     hubei          114.2397       30.5200          118       177     2012      04        13        104              0.000000      16.367523       0.139557       0.375437   -9999.000000   -9999.000000       0.140200       0.615000
57491     57491     hubei          114.2397       30.5200          118       177     2012      04        14        105              0.000000      17.964325       0.180803       0.362481   -9999.000000   -9999.000000   -9999.000000   -9999.000000
57491     57491     hubei          114.2397       30.5200          118       177     2012      04        15        106              0.000000      16.298126       0.687559       0.360386   -9999.000000   -9999.000000       0.119200   -9999.000000
57491     57491     hubei          114.2397       30.5200          118       177     2012      04        16        107              0.000000      17.953430       0.370219       0.357296   -9999.000000   -9999.000000       0.146500       0.645000
57491     57491     hubei          114.2397       30.5200          118       177     2012      04        17        108              0.000000      21.222778       0.088762       0.353993   -9999.000000   -9999.000000       0.174600   -9999.000000
57491     57491     hubei          114.2397       30.5200          118       177     2012      04        18        109              0.000000      20.928589       4.778772       0.353397   -9999.000000   -9999.000000   -9999.000000       0.397000
57491     57491     hubei          114.2397       30.5200          118       177     2012      04        19        110              0.000000      20.728638       0.121846       0.352020   -9999.000000   -9999.000000   -9999.000000   -9999.000000
57491     57491     hubei          114.2397       30.5200          118       177     2012      04        20        111              0.000000      23.958160       0.140519       0.347069   -9999.000000   -9999.000000   -9999.000000   -9999.000000
57491     57491     hubei          114.2397       30.5200          118       177     2012      04        21        112              0.000000      18.859009       1.175977       0.349534   -9999.000000   -9999.000000       0.118500       1.000000
57491     57491     hubei          114.2397       30.5200          118       177     2012      04        22        113              0.000000      22.107056       4.800702       0.345152       0.167000   -9999.000000       0.168800   -9999.000000
57491     57491     hubei          114.2397       30.5200          118       177     2012      04        23        114              0.000000      25.253113      15.364210       0.347960       0.232000   -9999.000000       0.194600       1.000000
57491     57491     hubei          114.2397       30.5200          118       177     2012      04        24        115              0.000000      25.318115      15.495508       0.371572   -9999.000000   -9999.000000       0.257300   -9999.000000
57491     57491     hubei          114.2397       30.5200          118       177     2012      04        25        116              0.000000      21.749695       1.251758       0.384227   -9999.000000   -9999.000000   -9999.000000       0.985000
57491     57491     hubei          114.2397       30.5200          118       177     2012      04        26        117              0.000000      20.724854       0.369238       0.365161   -9999.000000   -9999.000000   -9999.000000       0.569000
57491     57491     hubei          114.2397       30.5200          118       177     2012      04        27        118              0.000000      22.926392       0.703613       0.354299       0.181000   -9999.000000   -9999.000000   -9999.000000
57491     57491     hubei          114.2397       30.5200          118       177     2012      04        28        119              0.000000      25.042908      15.565969       0.349798       0.225000   -9999.000000       0.212100       0.845000
57491     57491     hubei          114.2397       30.5200          118       177     2012      04        29        120              0.000000      25.536743       0.468555       0.371456   -9999.000000   -9999.000000       0.239200   -9999.000000
57491     57491     hubei          114.2397       30.5200          118       177     2012      04        30        121              0.000000      24.825409      21.168751       0.362301   -9999.000000   -9999.000000   -9999.000000       0.989000
57491     57491     hubei          114.2397       30.5200          118       177     2012      05        01        122              0.000000      23.166595       0.389028       0.386763   -9999.000000   -9999.000000   -9999.000000   -9999.000000
57491     57491     hubei          114.2397       30.5200          118       177     2012      05        02        123              0.000000      22.559601       6.214172       0.368215       0.335000   -9999.000000       0.201300   -9999.000000
57491     57491     hubei          114.2397       30.5200          118       177     2012      05        03        124              0.000000      22.967712       1.133600       0.368072   -9999.000000   -9999.000000       0.160700       0.826000
57491     57491     hubei          114.2397       30.5200          118       177     2012      05        04        125              0.000000      22.795898       0.334587       0.369553       0.311000   -9999.000000       0.181700   -9999.000000
57491     57491     hubei          114.2397       30.5200          118       177     2012      05        05        126              0.000000      24.688507       0.368745       0.361788   -9999.000000   -9999.000000       0.181600       0.615000
57491     57491     hubei          114.2397       30.5200          118       177     2012      05        06        127              0.000000      26.971466       0.000000       0.355665   -9999.000000   -9999.000000   -9999.000000   -9999.000000
57491     57491     hubei          114.2397       30.5200          118       177     2012      05        07        128              0.000000      28.557861      31.539333       0.351683   -9999.000000   -9999.000000   -9999.000000       1.000000
57491     57491     hubei          114.2397       30.5200          118       177     2012      05        08        129              0.000000      27.841980       0.601213       0.387560       0.269000   -9999.000000       0.141000       0.974000
57491     57491     hubei          114.2397       30.5200          118       177     2012      05        09        130              0.000000      27.883270       1.732292       0.372596       0.385000   -9999.000000       0.224500   -9999.000000
57491     57491     hubei          114.2397       30.5200          118       177     2012      05        10        131              0.000000      23.996246       0.000000       0.368656   -9999.000000   -9999.000000       0.208900       0.740000
57491     57491     hubei          114.2397       30.5200          118       177     2012      05        11        132              0.000000      27.618042       0.352570       0.358979       0.257000   -9999.000000       0.212100   -9999.000000
57491     57491     hubei          114.2397       30.5200          118       177     2012      05        12        133              0.000000      28.866272       9.831566       0.355005       0.254000   -9999.000000   -9999.000000       1.000000
57491     57491     hubei          114.2397       30.5200          118       177     2012      05        13        134              0.000000      23.756287      13.692283       0.371910       0.343000   -9999.000000   -9999.000000   -9999.000000
57491     57491     hubei          114.2397       30.5200          118       177     2012      05        14        135              0.076143      24.906281       8.043510       0.374763   -9999.000000   -9999.000000       0.091700   -9999.000000
57491     57491     hubei          114.2397       30.5200          118       177     2012      05        15        136              0.072333      21.059479       0.698014       0.383215   -9999.000000   -9999.000000       0.213800       0.998000
57491     57491     hubei          114.2397       30.5200          118       177     2012      05        16        137              0.069458      22.232483       0.056550       0.368659   -9999.000000   -9999.000000       0.215700   -9999.000000
57491     57491     hubei          114.2397       30.5200          118       177     2012      05        17        138              0.065375      25.403656       0.040614       0.360491   -9999.000000   -9999.000000   -9999.000000       0.678000
57491     57491     hubei          114.2397       30.5200          118       177     2012      05        18        139              0.081083      27.687531      24.167389       0.355810   -9999.000000   -9999.000000   -9999.000000   -9999.000000
57491     57491     hubei          114.2397       30.5200          118       177     2012      05        19        140              0.089083      25.212830       0.379049       0.373040   -9999.000000   -9999.000000       0.218500   -9999.000000
57491     57491     hubei          114.2397       30.5200          118       177     2012      05        20        141              0.072167      25.260651       0.000000       0.376498   -9999.000000   -9999.000000       0.175900       1.000000
57491     57491     hubei          114.2397       30.5200          118       177     2012      05        21        142              0.068875      25.558838       5.556351       0.363327   -9999.000000   -9999.000000       0.194000   -9999.000000
57491     57491     hubei          114.2397       30.5200          118       177     2012      05        22        143              0.065333      26.291077      11.617581       0.358276       0.267000   -9999.000000       0.195800       0.961000
57491     57491     hubei          114.2397       30.5200          118       177     2012      05        23        144              0.070500      24.591461      11.617260       0.372571   -9999.000000   -9999.000000   -9999.000000   -9999.000000
57491     57491     hubei          114.2397       30.5200          118       177     2012      05        24        145              0.076417      23.271606       4.273399       0.380800       0.408000   -9999.000000   -9999.000000       0.883000
57491     57491     hubei          114.2397       30.5200          118       177     2012      05        25        146              0.000000      23.339355       1.550836       0.377187   -9999.000000   -9999.000000       0.094200       1.000000
57491     57491     hubei          114.2397       30.5200          118       177     2012      05        26        147              0.075333      24.236420       0.000000       0.369932   -9999.000000   -9999.000000       0.202100   -9999.000000
57491     57491     hubei          114.2397       30.5200          118       177     2012      05        27        148              0.072833      25.931396       0.000000       0.363085   -9999.000000   -9999.000000       0.172700       0.503000
57491     57491     hubei          114.2397       30.5200          118       177     2012      05        28        149              0.068667      27.730774      19.041769       0.358918       0.230000   -9999.000000       0.188600   -9999.000000
57491     57491     hubei          114.2397       30.5200          118       177     2012      05        29        150              0.238792      29.083374      61.646191       0.366074   -9999.000000   -9999.000000   -9999.000000       1.000000
57491     57491     hubei          114.2397       30.5200          118       177     2012      05        30        151              0.079667      22.794647       0.602481       0.455470   -9999.000000   -9999.000000   -9999.000000   -9999.000000
57491     57491     hubei          114.2397       30.5200          118       177     2012      05        31        152              0.083333      26.237213       0.000000       0.410799   -9999.000000   -9999.000000   -9999.000000   -9999.000000
57491     57491     hubei          114.2397       30.5200          118       177     2012      06        01        153              0.085708      26.867950       4.697998       0.384718   -9999.000000   -9999.000000       0.228600       0.978000
57491     57491     hubei          114.2397       30.5200          118       177     2012      06        02        154              0.113625      23.949280       0.000000       0.385150   -9999.000000   -9999.000000       0.206500   -9999.000000
57491     57491     hubei          114.2397       30.5200          118       177     2012      06        03        155              0.129958      26.741669       1.872766       0.375547       0.474000   -9999.000000   -9999.000000       0.663000
57491     57491     hubei          114.2397       30.5200          118       177     2012      06        04        156              0.130750      26.101990       0.243046       0.373000       0.470000   -9999.000000   -9999.000000   -9999.000000
57491     57491     hubei          114.2397       30.5200          118       177     2012      06        05        157              0.127042      26.019470       4.986178       0.370665   -9999.000000   -9999.000000       0.250100       0.727000
57491     57491     hubei          114.2397       30.5200          118       177     2012      06        06        158              0.128375      27.584900       3.864940       0.369667   -9999.000000   -9999.000000       0.178900       1.000000
57491     57491     hubei          114.2397       30.5200          118       177     2012      06        07        159              0.134417      26.274323       0.000000       0.376732       0.289000   -9999.000000       0.192800   -9999.000000
57491     57491     hubei          114.2397       30.5200          118       177     2012      06        08        160              0.134500      29.301697       0.129388       0.365173   -9999.000000   -9999.000000       0.193300       0.942000
57491     57491     hubei          114.2397       30.5200          118       177     2012      06        09        161              0.126167      29.903412       0.139489       0.360663       0.331000   -9999.000000   -9999.000000   -9999.000000
57491     57491     hubei          114.2397       30.5200          118       177     2012      06        10        162              0.121375      31.555756       2.109359       0.357141   -9999.000000       0.273100   -9999.000000       0.809000
57491     57491     hubei          114.2397       30.5200          118       177     2012      06        11        163              0.000000      28.583221       0.000000       0.361917   -9999.000000   -9999.000000       0.058000   -9999.000000
57491     57491     hubei          114.2397       30.5200          118       177     2012      06        12        164              0.113875      28.851685       1.801628       0.355899   -9999.000000   -9999.000000       0.201300   -9999.000000
57491     57491     hubei          114.2397       30.5200          118       177     2012      06        13        165              0.106417      29.847076       0.869615       0.349529   -9999.000000   -9999.000000       0.184100       1.000000
57491     57491     hubei          114.2397       30.5200          118       177     2012      06        14        166              0.102000      30.705139       1.241029       0.344590       0.362000   -9999.000000       0.208200   -9999.000000
57491     57491     hubei          114.2397       30.5200          118       177     2012      06        15        167              0.099250      29.813507       0.058864       0.345627   -9999.000000   -9999.000000   -9999.000000       0.699000
57491     57491     hubei          114.2397       30.5200          118       177     2012      06        16        168              0.095500      29.763641       0.537228       0.340499   -9999.000000   -9999.000000   -9999.000000   -9999.000000
57491     57491     hubei          114.2397       30.5200          118       177     2012      06        17        169              0.092458      30.168396       0.000000       0.336380   -9999.000000   -9999.000000       0.094100   -9999.000000
57491     57491     hubei          114.2397       30.5200          118       177     2012      06        18        170              0.090708      29.672424       0.383959       0.332417       0.257000   -9999.000000       0.192600       1.000000
57491     57491     hubei          114.2397       30.5200          118       177     2012      06        19        171              0.089292      30.585510       2.833178       0.330251       0.285000   -9999.000000       0.191500   -9999.000000
57491     57491     hubei          114.2397       30.5200          118       177     2012      06        20        172              0.089583      31.363831       0.000000       0.327344       0.374000   -9999.000000   -9999.000000       0.637000
57491     57491     hubei          114.2397       30.5200          118       177     2012      06        21        173              0.089333      31.610413       0.203266       0.324251   -9999.000000   -9999.000000   -9999.000000   -9999.000000
57491     57491     hubei          114.2397       30.5200          118       177     2012      06        22        174              0.088375      31.791443       1.492663       0.322688   -9999.000000   -9999.000000       0.144900       0.610000
57491     57491     hubei          114.2397       30.5200          118       177     2012      06        23        175              0.087208      30.746979       0.000000       0.326148       0.321000   -9999.000000       0.150200       0.565000
57491     57491     hubei          114.2397       30.5200          118       177     2012      06        24        176              0.086208      31.127228       0.251930       0.322241       0.245000   -9999.000000       0.185100   -9999.000000
57491     57491     hubei          114.2397       30.5200          118       177     2012      06        25        177              0.084042      31.824768       0.266660       0.318240       0.326000   -9999.000000       0.141800       0.251000
57491     57491     hubei          114.2397       30.5200          118       177     2012      06        26        178              0.202083      31.527252      69.236740       0.318064   -9999.000000   -9999.000000   -9999.000000   -9999.000000
57491     57491     hubei          114.2397       30.5200          118       177     2012      06        27        179              0.235458      28.849487      42.872696       0.391998       0.455000   -9999.000000   -9999.000000       1.000000
57491     57491     hubei          114.2397       30.5200          118       177     2012      06        28        180              0.306417      28.212341      15.424870       0.410586       0.459000       0.338900       0.062500   -9999.000000
57491     57491     hubei          114.2397       30.5200          118       177     2012      06        29        181              0.173875      28.881744       0.000000       0.392527       0.395500   -9999.000000       0.157800   -9999.000000
57491     57491     hubei          114.2397       30.5200          118       177     2012      06        30        182              0.167500      32.546143       2.598657       0.369145       0.388000   -9999.000000       0.144300   -9999.000000
57491     57491     hubei          114.2397       30.5200          118       177     2012      07        01        183              0.162682      31.708069       0.000000       0.365654   -9999.000000   -9999.000000       0.148000   -9999.000000
57491     57491     hubei          114.2397       30.5200          118       177     2012      07        02        184              0.157458      31.901947       0.000000       0.362896   -9999.000000   -9999.000000   -9999.000000       0.640000
57491     57491     hubei          114.2397       30.5200          118       177     2012      07        03        185              0.149833      32.522766       0.000000       0.356705       0.361000       0.186900   -9999.000000   -9999.000000
57491     57491     hubei          114.2397       30.5200          118       177     2012      07        04        186              0.140792      33.133270       0.045840       0.352607       0.371500   -9999.000000       0.145200       0.776000
57491     57491     hubei          114.2397       30.5200          118       177     2012      07        05        187              0.133125      32.936066       1.339620       0.350269       0.327000   -9999.000000       0.206400       0.809000
57491     57491     hubei          114.2397       30.5200          118       177     2012      07        06        188              0.127667      31.828247       0.000000       0.350413   -9999.000000   -9999.000000       0.211400   -9999.000000
57491     57491     hubei          114.2397       30.5200          118       177     2012      07        07        189              0.120958      33.894287       0.000000       0.345296   -9999.000000   -9999.000000   -9999.000000       1.000000
57491     57491     hubei          114.2397       30.5200          118       177     2012      07        08        190              0.113417      33.769348       0.000000       0.340496       0.403000       0.067500   -9999.000000   -9999.000000
57491     57491     hubei          114.2397       30.5200          118       177     2012      07        09        191              0.104833      33.554443       0.000000       0.335737       0.367000   -9999.000000       0.105800       0.413000
57491     57491     hubei          114.2397       30.5200          118       177     2012      07        10        192              0.097542      33.316040       0.223797       0.331939       0.379000   -9999.000000       0.144600   -9999.000000
57491     57491     hubei          114.2397       30.5200          118       177     2012      07        11        193              0.093292      33.000732       0.190439       0.330400       0.427000   -9999.000000       0.143900   -9999.000000
57491     57491     hubei          114.2397       30.5200          118       177     2012      07        12        194              0.187958      34.151855      36.584976       0.327272   -9999.000000   -9999.000000       0.148300       1.000000
57491     57491     hubei          114.2397       30.5200          118       177     2012      07        13        195              0.327300      29.113434     126.090309       0.385806       0.500000   -9999.000000   -9999.000000   -9999.000000
57491     57491     hubei          114.2397       30.5200          118       177     2012      07        14        196              0.166167      27.618561       0.369973       0.464150       0.341000   -9999.000000   -9999.000000       0.624000
57491     57491     hubei          114.2397       30.5200          118       177     2012      07        15        197              0.156167      29.669373       0.000000       0.413532       0.384000   -9999.000000       0.065600   -9999.000000
57491     57491     hubei          114.2397       30.5200          118       177     2012      07        16        198              0.146250      30.120972       1.091180       0.388155       0.429000   -9999.000000       0.216800   -9999.000000
57491     57491     hubei          114.2397       30.5200          118       177     2012      07        17        199              0.134500      30.815857       1.863783       0.378494       0.461000   -9999.000000       0.223700       0.915000
57491     57491     hubei          114.2397       30.5200          118       177     2012      07        18        200              0.122750      31.325409       0.000000       0.373404   -9999.000000   -9999.000000   -9999.000000   -9999.000000
57491     57491     hubei          114.2397       30.5200          118       177     2012      07        19        201              0.113125      31.424408       3.053329       0.367438       0.493000   -9999.000000   -9999.000000       0.808000
57491     57491     hubei          114.2397       30.5200          118       177     2012      07        20        202              0.104292      31.418854       0.818627       0.368534       0.425000   -9999.000000       0.208600   -9999.000000
57491     57491     hubei          114.2397       30.5200          118       177     2012      07        21        203              0.094818      32.966797       2.016882       0.362153       0.363500       0.115600       0.167500       1.000000
57491     57491     hubei          114.2397       30.5200          118       177     2012      07        22        204              0.095250      34.237305       2.867199       0.357043   -9999.000000   -9999.000000       0.206600       0.552000
57491     57491     hubei          114.2397       30.5200          118       177     2012      07        23        205              0.098833      33.317474       0.749561       0.360325   -9999.000000   -9999.000000       0.209200   -9999.000000
57491     57491     hubei          114.2397       30.5200          118       177     2012      07        24        206              0.098125      33.624359       2.876056       0.352893       0.379000   -9999.000000   -9999.000000       0.709000
57491     57491     hubei          114.2397       30.5200          118       177     2012      07        25        207              0.097583      33.958923       0.256859       0.347201       0.330500   -9999.000000   -9999.000000   -9999.000000
57491     57491     hubei          114.2397       30.5200          118       177     2012      07        26        208              0.096708      33.868652       0.000000       0.343362       0.342500   -9999.000000       0.106700       0.279000
57491     57491     hubei          114.2397       30.5200          118       177     2012      07        27        209              0.094625      33.913513       0.681426       0.339449       0.344000   -9999.000000       0.208300   -9999.000000
57491     57491     hubei          114.2397       30.5200          118       177     2012      07        28        210              0.092000      33.510986       0.000000       0.337865   -9999.000000   -9999.000000       0.176800   -9999.000000
57491     57491     hubei          114.2397       30.5200          118       177     2012      07        29        211              0.091500      34.073334       0.282993       0.333538   -9999.000000   -9999.000000       0.194700       0.569000
57491     57491     hubei          114.2397       30.5200          118       177     2012      07        30        212              0.090583      34.705566       0.220759       0.329225       0.303000   -9999.000000   -9999.000000   -9999.000000
57491     57491     hubei          114.2397       30.5200          118       177     2012      07        31        213              0.089542      34.538513       0.000000       0.326139       0.326000   -9999.000000   -9999.000000       0.315000
57491     57491     hubei          114.2397       30.5200          118       177     2012      08        01        214              0.087500      35.016205       4.582515       0.322692       0.389500   -9999.000000       0.073200   -9999.000000
57491     57491     hubei          114.2397       30.5200          118       177     2012      08        02        215              0.085417      34.032379       0.630151       0.318278       0.394000   -9999.000000       0.178700       0.767000
57491     57491     hubei          114.2397       30.5200          118       177     2012      08        03        216              0.083917      32.388641       2.755753       0.315027   -9999.000000   -9999.000000       0.191600       0.526000
57491     57491     hubei          114.2397       30.5200          118       177     2012      08        04        217              0.087458      31.850128      13.928837       0.316937       0.489000   -9999.000000   -9999.000000   -9999.000000
57491     57491     hubei          114.2397       30.5200          118       177     2012      08        05        218              0.094333      31.628082       1.421337       0.351028       0.400000   -9999.000000   -9999.000000       0.548000
57491     57491     hubei          114.2397       30.5200          118       177     2012      08        06        219              0.095708      32.741516       0.000000       0.342033       0.410500   -9999.000000       0.142300   -9999.000000
57491     57491     hubei          114.2397       30.5200          118       177     2012      08        07        220              0.095833      33.049713       0.000000       0.331256       0.365000   -9999.000000   -9999.000000       0.394000
57491     57491     hubei          114.2397       30.5200          118       177     2012      08        08        221              0.095792      32.634338       0.703197       0.323647   -9999.000000   -9999.000000       0.149500   -9999.000000
57491     57491     hubei          114.2397       30.5200          118       177     2012      08        09        222              0.092292      32.268982       0.869840       0.318801       0.495000   -9999.000000       0.157300   -9999.000000
57491     57491     hubei          114.2397       30.5200          118       177     2012      08        10        223              0.093708      30.453522       2.469876       0.322189       0.500000   -9999.000000   -9999.000000       0.939000
57491     57491     hubei          114.2397       30.5200          118       177     2012      08        11        224              0.118958      29.055206       9.263935       0.331451       0.429000   -9999.000000   -9999.000000   -9999.000000
57491     57491     hubei          114.2397       30.5200          118       177     2012      08        12        225              0.140792      30.663116       7.688832       0.346971       0.457000   -9999.000000       0.066700       0.795000
57491     57491     hubei          114.2397       30.5200          118       177     2012      08        13        226              0.136833      31.880463       1.819949       0.349696       0.488000   -9999.000000       0.222000   -9999.000000
57491     57491     hubei          114.2397       30.5200          118       177     2012      08        14        227              0.149042      29.883972       0.227500       0.350507   -9999.000000   -9999.000000       0.193900   -9999.000000
57491     57491     hubei          114.2397       30.5200          118       177     2012      08        15        228              0.143833      30.011322       0.000000       0.344038       0.493000   -9999.000000       0.200900       1.000000
57491     57491     hubei          114.2397       30.5200          118       177     2012      08        16        229              0.144083      31.737946       0.000000       0.335075       0.417500   -9999.000000   -9999.000000   -9999.000000
57491     57491     hubei          114.2397       30.5200          118       177     2012      08        17        230              0.145875      31.629761       0.000000       0.329301       0.443500   -9999.000000   -9999.000000       0.416000
57491     57491     hubei          114.2397       30.5200          118       177     2012      08        18        231              0.143875      33.350677      19.820921       0.323920       0.423000   -9999.000000       0.113100   -9999.000000
57491     57491     hubei          114.2397       30.5200          118       177     2012      08        19        232              0.140875      34.383331       0.526305       0.317705   -9999.000000   -9999.000000       0.198100       0.544000
57491     57491     hubei          114.2397       30.5200          118       177     2012      08        20        233              0.141292      33.912140       8.768147       0.313655       0.486000   -9999.000000       0.171400       1.000000
57491     57491     hubei          114.2397       30.5200          118       177     2012      08        21        234              0.158083      32.951447       0.688415       0.328129       0.484500       0.138400   -9999.000000   -9999.000000
57491     57491     hubei          114.2397       30.5200          118       177     2012      08        22        235              0.149792      27.878784       0.804475       0.332279       0.415000   -9999.000000   -9999.000000   -9999.000000
57491     57491     hubei          114.2397       30.5200          118       177     2012      08        23        236              0.147458      25.562256       0.217433       0.328061   -9999.000000   -9999.000000       0.152600   -9999.000000
57491     57491     hubei          114.2397       30.5200          118       177     2012      08        24        237              0.145750      26.439423      11.976020       0.326558   -9999.000000   -9999.000000       0.161500       0.443000
57491     57491     hubei          114.2397       30.5200          118       177     2012      08        25        238              0.000000      27.538269       0.000000       0.321875   -9999.000000   -9999.000000       0.185100   -9999.000000
57491     57491     hubei          114.2397       30.5200          118       177     2012      08        26        239              0.142708      30.520569      22.970947       0.316316       0.500000   -9999.000000       0.199600   -9999.000000
57491     57491     hubei          114.2397       30.5200          118       177     2012      08        27        240              0.246458      28.961914      14.626532       0.368467   -9999.000000   -9999.000000   -9999.000000       0.443000
57491     57491     hubei          114.2397       30.5200          118       177     2012      08        28        241              0.311917      27.462860       0.565356       0.373510       0.436000   -9999.000000   -9999.000000   -9999.000000
57491     57491     hubei          114.2397       30.5200          118       177     2012      08        29        242              0.312042      29.819763       0.000000       0.350636       0.474000   -9999.000000       0.038800       0.557000
57491     57491     hubei          114.2397       30.5200          118       177     2012      08        30        243              0.310833      31.155121       0.000000       0.339872   -9999.000000   -9999.000000       0.196500   -9999.000000
57491     57491     hubei          114.2397       30.5200          118       177     2012      08        31        244              0.310250      31.526459       0.000000       0.333581       0.491000       0.066400       0.180800       0.644000
57491     57491     hubei          114.2397       30.5200          118       177     2012      09        01        245              0.308875      32.291382       0.469324       0.326934       0.419000   -9999.000000       0.202400       0.515000
57491     57491     hubei          114.2397       30.5200          118       177     2012      09        02        246              0.314250      33.056000       3.926007       0.321541       0.441000   -9999.000000   -9999.000000   -9999.000000
57491     57491     hubei          114.2397       30.5200          118       177     2012      09        03        247              0.317542      27.131042       0.122869       0.336004   -9999.000000   -9999.000000   -9999.000000       0.407000
57491     57491     hubei          114.2397       30.5200          118       177     2012      09        04        248              0.315333      27.948853       0.000000       0.324732   -9999.000000   -9999.000000       0.095400   -9999.000000
57491     57491     hubei          114.2397       30.5200          118       177     2012      09        05        249              0.313875      28.079193       0.000000       0.319217   -9999.000000   -9999.000000       0.152700       0.411000
57491     57491     hubei          114.2397       30.5200          118       177     2012      09        06        250              0.312000      28.950928       0.307595       0.312353       0.381000   -9999.000000       0.155600   -9999.000000
57491     57491     hubei          114.2397       30.5200          118       177     2012      09        07        251              0.311083      29.166290       0.270894       0.310554       0.417500   -9999.000000   -9999.000000   -9999.000000
57491     57491     hubei          114.2397       30.5200          118       177     2012      09        08        252              0.311000      30.464600      57.011868       0.308901       0.464000       0.057200   -9999.000000       0.784000
57491     57491     hubei          114.2397       30.5200          118       177     2012      09        09        253              0.319250      27.899048       0.187771       0.357198   -9999.000000   -9999.000000       0.125900   -9999.000000
57491     57491     hubei          114.2397       30.5200          118       177     2012      09        10        254              0.317000      25.547089       0.000000       0.377562   -9999.000000   -9999.000000       0.174800       0.628000
57491     57491     hubei          114.2397       30.5200          118       177     2012      09        11        255              0.315833      27.913727       7.045432       0.357054       0.420000   -9999.000000       0.171000   -9999.000000
57491     57491     hubei          114.2397       30.5200          118       177     2012      09        12        256              0.321125      28.537567      19.127287       0.359898       0.400000   -9999.000000       0.211400   -9999.000000
57491     57491     hubei          114.2397       30.5200          118       177     2012      09        13        257              0.318522      23.330841       0.000000       0.382028   -9999.000000   -9999.000000   -9999.000000       1.000000
57491     57491     hubei          114.2397       30.5200          118       177     2012      09        14        258              0.317042      21.933899       0.906712       0.361133   -9999.000000   -9999.000000   -9999.000000   -9999.000000
57491     57491     hubei          114.2397       30.5200          118       177     2012      09        15        259              0.315250      24.296722       0.000000       0.349129   -9999.000000   -9999.000000       0.012500       0.384000
57491     57491     hubei          114.2397       30.5200          118       177     2012      09        16        260              0.313500      24.773254       0.092460       0.341326   -9999.000000   -9999.000000       0.181300   -9999.000000
57491     57491     hubei          114.2397       30.5200          118       177     2012      09        17        261              0.311792      24.770935       0.136143       0.336569   -9999.000000   -9999.000000       0.159700       0.835000
57491     57491     hubei          114.2397       30.5200          118       177     2012      09        18        262              0.310125      24.831207       3.009385       0.333120   -9999.000000   -9999.000000       0.140600       0.699000
57491     57491     hubei          114.2397       30.5200          118       177     2012      09        19        263              0.308542      25.376038       0.000000       0.329514   -9999.000000   -9999.000000   -9999.000000   -9999.000000
57491     57491     hubei          114.2397       30.5200          118       177     2012      09        20        264              0.307250      26.494873       1.273035       0.325360   -9999.000000   -9999.000000       0.157100       0.154000
57491     57491     hubei          114.2397       30.5200          118       177     2012      09        21        265              0.304458      27.619995       0.850726       0.323883   -9999.000000   -9999.000000       0.114300   -9999.000000
57491     57491     hubei          114.2397       30.5200          118       177     2012      09        22        266              0.304208      23.152557       0.305612       0.332285   -9999.000000   -9999.000000       0.153500       1.000000
57491     57491     hubei          114.2397       30.5200          118       177     2012      09        23        267              0.303292      26.103455       0.572084       0.327250       0.314000   -9999.000000       0.162500   -9999.000000
57491     57491     hubei          114.2397       30.5200          118       177     2012      09        24        268              0.303125      25.740021       1.138921       0.327681       0.314000   -9999.000000   -9999.000000   -9999.000000
57491     57491     hubei          114.2397       30.5200          118       177     2012      09        25        269              0.302208      27.089355       0.202247       0.323000   -9999.000000   -9999.000000   -9999.000000       0.221000
57491     57491     hubei          114.2397       30.5200          118       177     2012      09        26        270              0.300167      27.378510       0.000000       0.319069   -9999.000000       0.048300       0.089300   -9999.000000
57491     57491     hubei          114.2397       30.5200          118       177     2012      09        27        271              0.300286      25.889435       0.361937       0.320545   -9999.000000   -9999.000000       0.169000       0.286000
57491     57491     hubei          114.2397       30.5200          118       177     2012      09        28        272              0.297375      26.765717       0.285452       0.316349   -9999.000000   -9999.000000       0.155600   -9999.000000
57491     57491     hubei          114.2397       30.5200          118       177     2012      09        29        273              0.296667      22.980316       0.000000       0.310207   -9999.000000   -9999.000000       0.173800       1.000000
57491     57491     hubei          114.2397       30.5200          118       177     2012      09        30        274              0.294917      22.767975       0.000000       0.308792   -9999.000000   -9999.000000   -9999.000000       0.592000
57491     57491     hubei          114.2397       30.5200          118       177     2012      10        01        275              0.294333      21.731323       0.571614       0.310644   -9999.000000   -9999.000000   -9999.000000   -9999.000000
57491     57491     hubei          114.2397       30.5200          118       177     2012      10        02        276              0.293208      22.829681       0.584859       0.308625   -9999.000000   -9999.000000       0.016000       0.469000
57491     57491     hubei          114.2397       30.5200          118       177     2012      10        03        277              0.291667      23.975342       0.080555       0.306671   -9999.000000   -9999.000000       0.127200   -9999.000000
57491     57491     hubei          114.2397       30.5200          118       177     2012      10        04        278              0.290875      23.487122       0.093242       0.307469       0.373000   -9999.000000       0.138300       0.510000
57491     57491     hubei          114.2397       30.5200          118       177     2012      10        05        279              0.289125      24.608429       3.351389       0.306826   -9999.000000   -9999.000000   -9999.000000   -9999.000000
57491     57491     hubei          114.2397       30.5200          118       177     2012      10        06        280              0.289875      21.203400       0.000000       0.322663   -9999.000000   -9999.000000   -9999.000000   -9999.000000
57491     57491     hubei          114.2397       30.5200          118       177     2012      10        07        281              0.290000      24.213348       0.558949       0.317043   -9999.000000   -9999.000000       0.141600       1.000000
57491     57491     hubei          114.2397       30.5200          118       177     2012      10        08        282              0.290792      22.822052       0.424042       0.319574       0.328000   -9999.000000       0.099800   -9999.000000
57491     57491     hubei          114.2397       30.5200          118       177     2012      10        09        283              0.291042      23.830078       0.404423       0.316126       0.218000   -9999.000000       0.112800       0.245000
57491     57491     hubei          114.2397       30.5200          118       177     2012      10        10        284              0.290750      23.869293       0.085092       0.311823   -9999.000000   -9999.000000       0.116100   -9999.000000
57491     57491     hubei          114.2397       30.5200          118       177     2012      10        11        285              0.290375      23.863342       1.487919       0.307967   -9999.000000   -9999.000000   -9999.000000   -9999.000000
57491     57491     hubei          114.2397       30.5200          118       177     2012      10        12        286              0.289750      23.101746       0.000000       0.311428   -9999.000000   -9999.000000   -9999.000000       1.000000
57491     57491     hubei          114.2397       30.5200          118       177     2012      10        13        287              0.288333      22.060272       0.647861       0.311145   -9999.000000   -9999.000000       0.014500   -9999.000000
57491     57491     hubei          114.2397       30.5200          118       177     2012      10        14        288              0.288333      21.203735       2.632679       0.312053   -9999.000000   -9999.000000       0.125300       0.022000
57491     57491     hubei          114.2397       30.5200          118       177     2012      10        15        289              0.287875      21.997498      12.997169       0.315474       0.283000   -9999.000000       0.149400   -9999.000000
57491     57491     hubei          114.2397       30.5200          118       177     2012      10        16        290              0.301417      21.604401      11.491068       0.345308   -9999.000000   -9999.000000       0.205500       1.000000
57491     57491     hubei          114.2397       30.5200          118       177     2012      10        17        291              0.305750      18.908234       0.000000       0.368230   -9999.000000   -9999.000000   -9999.000000       0.599000
57491     57491     hubei          114.2397       30.5200          118       177     2012      10        18        292              0.303958      18.563782       0.000000       0.344481   -9999.000000   -9999.000000   -9999.000000   -9999.000000
57491     57491     hubei          114.2397       30.5200          118       177     2012      10        19        293              0.302522      20.070831       0.102758       0.337160   -9999.000000       0.086200       0.059900       0.393000
57491     57491     hubei          114.2397       30.5200          118       177     2012      10        20        294              0.302000      20.996582       1.257286       0.334100       0.178000   -9999.000000       0.178400   -9999.000000
57491     57491     hubei          114.2397       30.5200          118       177     2012      10        21        295              0.301333      23.401245      20.664707       0.333339       0.230000   -9999.000000       0.187100       0.603000
57491     57491     hubei          114.2397       30.5200          118       177     2012      10        22        296              0.300333      23.136810       1.519715       0.364450   -9999.000000   -9999.000000   -9999.000000   -9999.000000
57491     57491     hubei          114.2397       30.5200          118       177     2012      10        23        297              0.300667      16.949280       0.185120       0.356516   -9999.000000   -9999.000000   -9999.000000   -9999.000000
57491     57491     hubei          114.2397       30.5200          118       177     2012      10        24        298              0.299500      18.992401       1.730716       0.345297   -9999.000000   -9999.000000       0.126300       0.577000
57491     57491     hubei          114.2397       30.5200          118       177     2012      10        25        299              0.000000      17.056366       8.007856       0.347571   -9999.000000   -9999.000000       0.147900   -9999.000000
57491     57491     hubei          114.2397       30.5200          118       177     2012      10        26        300              0.316250      18.449219      17.841463       0.356649   -9999.000000   -9999.000000       0.188800       1.000000
57491     57491     hubei          114.2397       30.5200          118       177     2012      10        27        301              0.316458      17.731293       0.187991       0.380333   -9999.000000   -9999.000000       0.192700   -9999.000000
57491     57491     hubei          114.2397       30.5200          118       177     2012      10        28        302              0.000000      19.208954      12.389488       0.360595   -9999.000000   -9999.000000   -9999.000000       0.705000
57491     57491     hubei          114.2397       30.5200          118       177     2012      10        29        303              0.343500      20.500519      26.436024       0.360188   -9999.000000       0.152100   -9999.000000       1.000000
57491     57491     hubei          114.2397       30.5200          118       177     2012      10        30        304              0.317083      17.346558       0.000000       0.396386   -9999.000000   -9999.000000       0.024700   -9999.000000
57491     57491     hubei          114.2397       30.5200          118       177     2012      10        31        305              0.314458      17.156738       0.000000       0.367593   -9999.000000   -9999.000000       0.197500       0.674000
57491     57491     hubei          114.2397       30.5200          118       177     2012      11        01        306              0.312375      16.856903       0.000000       0.357629   -9999.000000   -9999.000000       0.199200   -9999.000000
57491     57491     hubei          114.2397       30.5200          118       177     2012      11        02        307              0.311250      16.397797       0.287437       0.352299   -9999.000000   -9999.000000       0.197900       0.496000
57491     57491     hubei          114.2397       30.5200          118       177     2012      11        03        308              0.309292      17.813446       3.446618       0.348070   -9999.000000   -9999.000000   -9999.000000   -9999.000000
57491     57491     hubei          114.2397       30.5200          118       177     2012      11        04        309              0.309435      13.452728       0.585451       0.354747   -9999.000000   -9999.000000   -9999.000000   -9999.000000
57491     57491     hubei          114.2397       30.5200          118       177     2012      11        05        310              0.308417      14.237335       0.000000       0.348171   -9999.000000   -9999.000000       0.100300       0.752000
57491     57491     hubei          114.2397       30.5200          118       177     2012      11        06        311              0.307542      13.287933       0.000000       0.343757   -9999.000000       0.123000       0.180600   -9999.000000
57491     57491     hubei          114.2397       30.5200          118       177     2012      11        07        312              0.306417      13.793182       0.202653       0.341322   -9999.000000   -9999.000000       0.194300       0.639000
57491     57491     hubei          114.2397       30.5200          118       177     2012      11        08        313              0.304917      14.647919       0.249822       0.341213   -9999.000000   -9999.000000   -9999.000000   -9999.000000
57491     57491     hubei          114.2397       30.5200          118       177     2012      11        09        314              0.303917      13.671997       1.432546       0.342495   -9999.000000   -9999.000000   -9999.000000   -9999.000000
57491     57491     hubei          114.2397       30.5200          118       177     2012      11        10        315              0.303250      12.618958       0.000000       0.346623   -9999.000000   -9999.000000       0.088400       0.797000
57491     57491     hubei          114.2397       30.5200          118       177     2012      11        11        316              0.303208      12.070618       0.645767       0.344402   -9999.000000   -9999.000000       0.138600   -9999.000000
57491     57491     hubei          114.2397       30.5200          118       177     2012      11        12        317              0.302917      12.328613       0.000000       0.342311   -9999.000000   -9999.000000       0.130600       0.455000
57491     57491     hubei          114.2397       30.5200          118       177     2012      11        13        318              0.000000      13.472656       0.310908       0.340298   -9999.000000   -9999.000000       0.152700   -9999.000000
57491     57491     hubei          114.2397       30.5200          118       177     2012      11        14        319              0.302167      15.497314       0.567706       0.339250   -9999.000000   -9999.000000   -9999.000000       0.475000
57491     57491     hubei          114.2397       30.5200          118       177     2012      11        15        320              0.300667      15.709381       1.470520       0.338635   -9999.000000   -9999.000000   -9999.000000       1.000000
57491     57491     hubei          114.2397       30.5200          118       177     2012      11        16        321              0.299625      11.999390       2.664938       0.343356   -9999.000000   -9999.000000       0.010000   -9999.000000
57491     57491     hubei          114.2397       30.5200          118       177     2012      11        17        322              0.000000      10.629547       0.000000       0.349234   -9999.000000   -9999.000000       0.146100       0.521000
57491     57491     hubei          114.2397       30.5200          118       177     2012      11        18        323              0.299292      12.229279       0.383008       0.343491   -9999.000000   -9999.000000       0.157200   -9999.000000
57491     57491     hubei          114.2397       30.5200          118       177     2012      11        19        324              0.299000      13.561340       0.131723       0.340776   -9999.000000   -9999.000000   -9999.000000       0.781000
57491     57491     hubei          114.2397       30.5200          118       177     2012      11        20        325              0.298417      14.138489       4.423205       0.339508   -9999.000000   -9999.000000   -9999.000000   -9999.000000
57491     57491     hubei          114.2397       30.5200          118       177     2012      11        21        326              0.298000      14.044617       0.212603       0.348391   -9999.000000   -9999.000000       0.152300   -9999.000000
57491     57491     hubei          114.2397       30.5200          118       177     2012      11        22        327              0.300083      12.311310      13.613534       0.348087   -9999.000000   -9999.000000       0.121500       1.000000
57491     57491     hubei          114.2397       30.5200          118       177     2012      11        23        328              0.306542      11.769684       2.370565       0.370672   -9999.000000   -9999.000000       0.148200   -9999.000000
57491     57491     hubei          114.2397       30.5200          118       177     2012      11        24        329              0.306000       9.932220       1.318309       0.358894   -9999.000000   -9999.000000       0.170200       0.752000
57491     57491     hubei          114.2397       30.5200          118       177     2012      11        25        330              0.307500      11.164062       0.270871       0.355005   -9999.000000   -9999.000000   -9999.000000   -9999.000000
57491     57491     hubei          114.2397       30.5200          118       177     2012      11        26        331              0.308208       9.061554       0.000000       0.352925   -9999.000000   -9999.000000   -9999.000000       1.000000
57491     57491     hubei          114.2397       30.5200          118       177     2012      11        27        332              0.307083       9.943970       0.531964       0.347794   -9999.000000   -9999.000000       0.028000       0.513000
57491     57491     hubei          114.2397       30.5200          118       177     2012      11        28        333              0.306292      10.861847       0.000000       0.346802   -9999.000000   -9999.000000       0.143500   -9999.000000
57491     57491     hubei          114.2397       30.5200          118       177     2012      11        29        334              0.305625      11.117859       1.090448       0.345044   -9999.000000   -9999.000000       0.115700       1.000000
57491     57491     hubei          114.2397       30.5200          118       177     2012      11        30        335              0.305000      11.464508       0.894080       0.346190   -9999.000000   -9999.000000       0.145400   -9999.000000
57491     57491     hubei          114.2397       30.5200          118       177     2012      12        01        336              0.304000      11.535797       3.470881       0.345145   -9999.000000   -9999.000000   -9999.000000       1.000000
57491     57491     hubei          114.2397       30.5200          118       177     2012      12        02        337              0.304000       7.978943       0.913192       0.352598   -9999.000000   -9999.000000   -9999.000000   -9999.000000
57491     57491     hubei          114.2397       30.5200          118       177     2012      12        03        338              0.304458       6.646698       0.000000       0.348608   -9999.000000   -9999.000000       0.021800   -9999.000000
57491     57491     hubei          114.2397       30.5200          118       177     2012      12        04        339              0.303917       9.005005       0.000000       0.345771   -9999.000000   -9999.000000       0.131700       0.555000
57491     57491     hubei          114.2397       30.5200          118       177     2012      12        05        340              0.303958       8.318237       0.000000       0.344937   -9999.000000   -9999.000000       0.137600   -9999.000000
57491     57491     hubei          114.2397       30.5200          118       177     2012      12        06        341              0.303167       9.715637       0.000000       0.342795   -9999.000000   -9999.000000   -9999.000000       0.477000
57491     57491     hubei          114.2397       30.5200          118       177     2012      12        07        342              0.302833       9.517578       0.166552       0.342129   -9999.000000   -9999.000000   -9999.000000   -9999.000000
57491     57491     hubei          114.2397       30.5200          118       177     2012      12        08        343              0.302042      10.294525       0.000000       0.340895   -9999.000000   -9999.000000       0.106200   -9999.000000
57491     57491     hubei          114.2397       30.5200          118       177     2012      12        09        344              0.301333       9.424042       0.042048       0.339377   -9999.000000   -9999.000000       0.108100       0.824000
57491     57491     hubei          114.2397       30.5200          118       177     2012      12        10        345              0.300000       8.247345       0.502160       0.339107   -9999.000000   -9999.000000       0.137300   -9999.000000
57491     57491     hubei          114.2397       30.5200          118       177     2012      12        11        346              0.299875       6.606445       0.000000       0.340501   -9999.000000   -9999.000000       0.152900       0.866000
57491     57491     hubei          114.2397       30.5200          118       177     2012      12        12        347              0.299333       7.672333       0.107043       0.339418   -9999.000000   -9999.000000   -9999.000000   -9999.000000
57491     57491     hubei          114.2397       30.5200          118       177     2012      12        13        348              0.311708       8.848358      14.859851       0.339612   -9999.000000   -9999.000000   -9999.000000       0.872000
57491     57491     hubei          114.2397       30.5200          118       177     2012      12        14        349              0.315833       8.096802       6.810294       0.370922   -9999.000000   -9999.000000       0.014500       1.000000
57491     57491     hubei          114.2397       30.5200          118       177     2012      12        15        350              0.000000       5.698395       3.061354       0.368597   -9999.000000   -9999.000000       0.164200   -9999.000000
57491     57491     hubei          114.2397       30.5200          118       177     2012      12        16        351              0.311625       6.868317       0.118903       0.359869   -9999.000000   -9999.000000       0.136900       0.884000
57491     57491     hubei          114.2397       30.5200          118       177     2012      12        17        352              0.315708       6.919312      16.556969       0.355034   -9999.000000   -9999.000000       0.168500   -9999.000000
57491     57491     hubei          114.2397       30.5200          118       177     2012      12        18        353              0.312875       5.868835       0.000000       0.376918   -9999.000000   -9999.000000   -9999.000000       1.000000
57491     57491     hubei          114.2397       30.5200          118       177     2012      12        19        354              0.311000       5.367584       0.315137       0.364406   -9999.000000   -9999.000000   -9999.000000   -9999.000000
57491     57491     hubei          114.2397       30.5200          118       177     2012      12        20        355              0.000000       5.855774       3.870331       0.357275   -9999.000000   -9999.000000       0.082300   -9999.000000
57491     57491     hubei          114.2397       30.5200          118       177     2012      12        21        356              0.311667       2.966858       0.000000       0.362339   -9999.000000   -9999.000000       0.144900       0.537000
57491     57491     hubei          114.2397       30.5200          118       177     2012      12        22        357              0.310208       3.551056       0.000000       0.356348   -9999.000000   -9999.000000       0.131500   -9999.000000
57491     57491     hubei          114.2397       30.5200          118       177     2012      12        23        358              0.309292       3.166687       0.947378       0.349291   -9999.000000   -9999.000000   -9999.000000       1.000000
57491     57491     hubei          114.2397       30.5200          118       177     2012      12        24        359              0.308278       3.247864       0.000000       0.344835   -9999.000000   -9999.000000   -9999.000000   -9999.000000
57491     57491     hubei          114.2397       30.5200          118       177     2012      12        25        360              0.307708       5.286285       0.677436       0.348688   -9999.000000   -9999.000000       0.086000       0.717000
57491     57491     hubei          114.2397       30.5200          118       177     2012      12        26        361              0.000000       3.592133       0.719216       0.348433   -9999.000000   -9999.000000       0.131700       1.000000
57491     57491     hubei          114.2397       30.5200          118       177     2012      12        27        362              0.308750       2.001587       1.768389       0.342977   -9999.000000   -9999.000000       0.112100   -9999.000000
57491     57491     hubei          114.2397       30.5200          118       177     2012      12        28        363              0.000000       1.822174       6.595346       0.345399   -9999.000000   -9999.000000       0.160500       0.715000
57491     57491     hubei          114.2397       30.5200          118       177     2012      12        29        364              0.000000       2.813751       4.053151       0.353714   -9999.000000   -9999.000000   -9999.000000   -9999.000000
57491     57491     hubei          114.2397       30.5200          118       177     2012      12        30        365              0.000000       1.468262       1.007524       0.340982   -9999.000000   -9999.000000   -9999.000000       0.392000
57491     57491     hubei          114.2397       30.5200          118       177     2012      12        31        366              0.309133       2.315948       0.358827       0.326332   -9999.000000   -9999.000000       0.010000   -9999.000000
