# Supplementary material for: Research on Fusing Multisatellite Soil Moisture Data Based on Bayesian Model Averaging
Source: Hindawi journal article supplement (doi:10.1155/2018/9310838), 2018-06-25
Supplement: f1 [file 9310838.f1.zip › 2012_sm00-10cm_daily_ZDB_ZHY_57492_366days_allin.txt]

57492     57492     hubei          114.4800       30.5000          118       178     2012      01        01        001              0.000000   -9999.000000       0.000000   -9999.000000   -9999.000000   -9999.000000       0.105700   -9999.000000
57492     57492     hubei          114.4800       30.5000          118       178     2012      01        02        002              0.000000       4.955200       0.000000       0.366191   -9999.000000   -9999.000000       0.137500   -9999.000000
57492     57492     hubei          114.4800       30.5000          118       178     2012      01        03        003              0.000000       5.414398       0.000000       0.369560   -9999.000000   -9999.000000   -9999.000000       0.770000
57492     57492     hubei          114.4800       30.5000          118       178     2012      01        04        004              0.000000       2.760376       0.000000       0.353991   -9999.000000   -9999.000000   -9999.000000   -9999.000000
57492     57492     hubei          114.4800       30.5000          118       178     2012      01        05        005              0.000000       3.799774       0.000000       0.359135   -9999.000000   -9999.000000       0.028100       0.994000
57492     57492     hubei          114.4800       30.5000          118       178     2012      01        06        006              0.000000       2.952087       0.000000       0.358566   -9999.000000   -9999.000000       0.124300   -9999.000000
57492     57492     hubei          114.4800       30.5000          118       178     2012      01        07        007              0.000000       5.092560       0.000000       0.363090   -9999.000000   -9999.000000       0.130700   -9999.000000
57492     57492     hubei          114.4800       30.5000          118       178     2012      01        08        008              0.000000       3.154510       0.299277       0.364657   -9999.000000   -9999.000000       0.120400       0.484000
57492     57492     hubei          114.4800       30.5000          118       178     2012      01        09        009              0.000000       4.029785       0.000000       0.365479   -9999.000000   -9999.000000   -9999.000000   -9999.000000
57492     57492     hubei          114.4800       30.5000          118       178     2012      01        10        010              0.000000       6.012573       0.000000       0.364693   -9999.000000   -9999.000000       0.097100       0.925000
57492     57492     hubei          114.4800       30.5000          118       178     2012      01        11        011              0.000000       6.144501       0.000000       0.363697   -9999.000000   -9999.000000       0.082000   -9999.000000
57492     57492     hubei          114.4800       30.5000          118       178     2012      01        12        012              0.000000       4.473328       0.224802       0.363764   -9999.000000   -9999.000000       0.122500       0.604000
57492     57492     hubei          114.4800       30.5000          118       178     2012      01        13        013              0.000000       4.496338       8.144844       0.364021   -9999.000000   -9999.000000       0.110600       0.526000
57492     57492     hubei          114.4800       30.5000          118       178     2012      01        14        014              0.000000       4.607300       0.974737       0.372500   -9999.000000   -9999.000000   -9999.000000   -9999.000000
57492     57492     hubei          114.4800       30.5000          118       178     2012      01        15        015              0.000000       4.011749       0.118192       0.374808   -9999.000000   -9999.000000   -9999.000000       1.000000
57492     57492     hubei          114.4800       30.5000          118       178     2012      01        16        016              0.000000       3.868195       0.000000       0.369290   -9999.000000   -9999.000000       0.076400   -9999.000000
57492     57492     hubei          114.4800       30.5000          118       178     2012      01        17        017              0.000000       5.320618       3.112505       0.367363   -9999.000000   -9999.000000       0.109900       1.000000
57492     57492     hubei          114.4800       30.5000          118       178     2012      01        18        018              0.000000       5.497040       1.359740       0.371959   -9999.000000   -9999.000000       0.113100   -9999.000000
57492     57492     hubei          114.4800       30.5000          118       178     2012      01        19        019              0.000000       5.500061       0.817989       0.371094   -9999.000000   -9999.000000       0.128600   -9999.000000
57492     57492     hubei          114.4800       30.5000          118       178     2012      01        20        020              0.000000       5.839691       4.540360       0.367925   -9999.000000   -9999.000000   -9999.000000       1.000000
57492     57492     hubei          114.4800       30.5000          118       178     2012      01        21        021              0.000000       4.914734       1.343022       0.374508   -9999.000000   -9999.000000   -9999.000000   -9999.000000
57492     57492     hubei          114.4800       30.5000          118       178     2012      01        22        022              0.000000       2.181213       2.186982       0.357259   -9999.000000   -9999.000000       0.028000       0.572000
57492     57492     hubei          114.4800       30.5000          118       178     2012      01        23        023              0.000000       1.713593       0.860561       0.331655   -9999.000000   -9999.000000       0.091900   -9999.000000
57492     57492     hubei          114.4800       30.5000          118       178     2012      01        24        024              0.000000       2.125031       0.599324       0.347146   -9999.000000   -9999.000000   -9999.000000   -9999.000000
57492     57492     hubei          114.4800       30.5000          118       178     2012      01        25        025              0.000000       3.341278       0.000000       0.342270   -9999.000000   -9999.000000       0.110300       1.000000
57492     57492     hubei          114.4800       30.5000          118       178     2012      01        26        026              0.000000       3.666534       0.000000       0.347235   -9999.000000   -9999.000000   -9999.000000   -9999.000000
57492     57492     hubei          114.4800       30.5000          118       178     2012      01        27        027              0.000000       5.170074       0.000000       0.361619   -9999.000000   -9999.000000       0.093900       1.000000
57492     57492     hubei          114.4800       30.5000          118       178     2012      01        28        028              0.000000       3.740845       0.000000       0.364606   -9999.000000   -9999.000000       0.085900   -9999.000000
57492     57492     hubei          114.4800       30.5000          118       178     2012      01        29        029              0.000000       5.450073       0.718274       0.364091   -9999.000000   -9999.000000       0.097900       1.000000
57492     57492     hubei          114.4800       30.5000          118       178     2012      01        30        030              0.000000       5.442993       5.373397       0.365325   -9999.000000   -9999.000000       0.109400       1.000000
57492     57492     hubei          114.4800       30.5000          118       178     2012      01        31        031              0.000000       4.793091       0.000000       0.364625   -9999.000000   -9999.000000   -9999.000000   -9999.000000
57492     57492     hubei          114.4800       30.5000          118       178     2012      02        01        032              0.000000       7.223907       0.000000       0.362610   -9999.000000   -9999.000000   -9999.000000       1.000000
57492     57492     hubei          114.4800       30.5000          118       178     2012      02        02        033              0.000000       5.738708       0.000000       0.361930   -9999.000000   -9999.000000       0.050200   -9999.000000
57492     57492     hubei          114.4800       30.5000          118       178     2012      02        03        034              0.000000       3.556549       0.000000       0.354349   -9999.000000   -9999.000000       0.102500       0.246000
57492     57492     hubei          114.4800       30.5000          118       178     2012      02        04        035              0.000000       5.754150       0.000000       0.358410   -9999.000000   -9999.000000       0.115700   -9999.000000
57492     57492     hubei          114.4800       30.5000          118       178     2012      02        05        036              0.000000       4.364929       9.393239       0.360835   -9999.000000   -9999.000000       0.129100   -9999.000000
57492     57492     hubei          114.4800       30.5000          118       178     2012      02        06        037              0.000000       5.721497       1.221113       0.375339   -9999.000000   -9999.000000   -9999.000000       1.000000
57492     57492     hubei          114.4800       30.5000          118       178     2012      02        07        038              0.000000       6.043793       0.000000       0.369823   -9999.000000   -9999.000000   -9999.000000   -9999.000000
57492     57492     hubei          114.4800       30.5000          118       178     2012      02        08        039              0.000000       4.908600       0.000000       0.360448   -9999.000000   -9999.000000       0.035600       0.871000
57492     57492     hubei          114.4800       30.5000          118       178     2012      02        09        040              0.000000       4.883301       0.000000       0.359984   -9999.000000   -9999.000000       0.106800   -9999.000000
57492     57492     hubei          114.4800       30.5000          118       178     2012      02        10        041              0.179353       2.855499       0.000000       0.356167   -9999.000000   -9999.000000       0.104300       1.000000
57492     57492     hubei          114.4800       30.5000          118       178     2012      02        11        042              0.178417       5.007202       0.242179       0.358120   -9999.000000   -9999.000000   -9999.000000       0.572000
57492     57492     hubei          114.4800       30.5000          118       178     2012      02        12        043              0.177583       7.024017       1.031724       0.359086   -9999.000000   -9999.000000   -9999.000000   -9999.000000
57492     57492     hubei          114.4800       30.5000          118       178     2012      02        13        044              0.177583       5.463226       1.354309       0.361101   -9999.000000   -9999.000000   -9999.000000       1.000000
57492     57492     hubei          114.4800       30.5000          118       178     2012      02        14        045              0.185167       5.134979       8.245291       0.364067   -9999.000000   -9999.000000       0.119000   -9999.000000
57492     57492     hubei          114.4800       30.5000          118       178     2012      02        15        046              0.186667       4.712128       2.190404       0.375597   -9999.000000   -9999.000000       0.131800       1.000000
57492     57492     hubei          114.4800       30.5000          118       178     2012      02        16        047              0.185583       4.878265       0.000000       0.373036   -9999.000000   -9999.000000       0.123600   -9999.000000
57492     57492     hubei          114.4800       30.5000          118       178     2012      02        17        048              0.184333       6.500702       0.000000       0.366952   -9999.000000   -9999.000000   -9999.000000   -9999.000000
57492     57492     hubei          114.4800       30.5000          118       178     2012      02        18        049              0.184333       7.173004       0.000000       0.363205   -9999.000000   -9999.000000   -9999.000000       1.000000
57492     57492     hubei          114.4800       30.5000          118       178     2012      02        19        050              0.183583       7.181030       0.000000       0.360691   -9999.000000   -9999.000000       0.045800   -9999.000000
57492     57492     hubei          114.4800       30.5000          118       178     2012      02        20        051              0.182391       8.628510       0.323962       0.358763   -9999.000000   -9999.000000       0.117300       1.000000
57492     57492     hubei          114.4800       30.5000          118       178     2012      02        21        052              0.182000       7.046814       5.135237       0.360092   -9999.000000   -9999.000000   -9999.000000   -9999.000000
57492     57492     hubei          114.4800       30.5000          118       178     2012      02        22        053              0.234625       8.144104      21.599058       0.367807   -9999.000000   -9999.000000       0.131400   -9999.000000
57492     57492     hubei          114.4800       30.5000          118       178     2012      02        23        054              0.204083       8.658417       1.312814       0.394864   -9999.000000   -9999.000000   -9999.000000       1.000000
57492     57492     hubei          114.4800       30.5000          118       178     2012      02        24        055              0.201750       8.325348       0.149715       0.376776   -9999.000000   -9999.000000   -9999.000000   -9999.000000
57492     57492     hubei          114.4800       30.5000          118       178     2012      02        25        056              0.199667       5.851471       0.177842       0.371903   -9999.000000   -9999.000000       0.043400       0.701000
57492     57492     hubei          114.4800       30.5000          118       178     2012      02        26        057              0.198250       5.189117       0.000000       0.369593   -9999.000000   -9999.000000       0.108000   -9999.000000
57492     57492     hubei          114.4800       30.5000          118       178     2012      02        27        058              0.197304       6.627106       0.000000       0.367526   -9999.000000   -9999.000000   -9999.000000       1.000000
57492     57492     hubei          114.4800       30.5000          118       178     2012      02        28        059              0.196750       6.736481       0.240508       0.366623   -9999.000000   -9999.000000   -9999.000000       0.414000
57492     57492     hubei          114.4800       30.5000          118       178     2012      02        29        060              0.000000   -9999.000000       0.143130   -9999.000000   -9999.000000   -9999.000000   -9999.000000   -9999.000000
57492     57492     hubei          114.4800       30.5000          118       178     2012      03        01        061              0.195583       8.969452       0.124412       0.365033   -9999.000000   -9999.000000       0.127000       1.000000
57492     57492     hubei          114.4800       30.5000          118       178     2012      03        02        062              0.195292       8.265350      10.315145       0.365592   -9999.000000   -9999.000000       0.109300   -9999.000000
57492     57492     hubei          114.4800       30.5000          118       178     2012      03        03        063              0.203542       8.143097      12.448574       0.372344   -9999.000000   -9999.000000       0.144200       1.000000
57492     57492     hubei          114.4800       30.5000          118       178     2012      03        04        064              0.215000       7.120636       1.586480       0.387349   -9999.000000   -9999.000000       0.161000   -9999.000000
57492     57492     hubei          114.4800       30.5000          118       178     2012      03        05        065              0.206292       5.445679       6.322314       0.381942   -9999.000000   -9999.000000   -9999.000000   -9999.000000
57492     57492     hubei          114.4800       30.5000          118       178     2012      03        06        066              0.205042       7.027649       3.972781       0.373982   -9999.000000   -9999.000000   -9999.000000       1.000000
57492     57492     hubei          114.4800       30.5000          118       178     2012      03        07        067              0.000000       8.695892       7.162709       0.375826   -9999.000000   -9999.000000       0.065500   -9999.000000
57492     57492     hubei          114.4800       30.5000          118       178     2012      03        08        068              0.226250       7.717804       3.546614       0.384150   -9999.000000   -9999.000000       0.120300       0.905000
57492     57492     hubei          114.4800       30.5000          118       178     2012      03        09        069              0.209542       6.799500       0.000000       0.381993   -9999.000000   -9999.000000       0.133200   -9999.000000
57492     57492     hubei          114.4800       30.5000          118       178     2012      03        10        070              0.206500       7.532104       0.000000       0.374761   -9999.000000   -9999.000000       0.123400       1.000000
57492     57492     hubei          114.4800       30.5000          118       178     2012      03        11        071              0.204792      10.216614       0.000000       0.371553   -9999.000000   -9999.000000   -9999.000000       0.977000
57492     57492     hubei          114.4800       30.5000          118       178     2012      03        12        072              0.203750       9.676971       0.000000       0.370682   -9999.000000   -9999.000000   -9999.000000   -9999.000000
57492     57492     hubei          114.4800       30.5000          118       178     2012      03        13        073              0.202261      11.228027       0.000000       0.368901   -9999.000000   -9999.000000       0.041700       1.000000
57492     57492     hubei          114.4800       30.5000          118       178     2012      03        14        074              0.201250      13.213837       2.135401       0.366842   -9999.000000   -9999.000000       0.122100   -9999.000000
57492     57492     hubei          114.4800       30.5000          118       178     2012      03        15        075              0.205583      15.020721       3.710993       0.366976   -9999.000000   -9999.000000       0.136000       0.913000
57492     57492     hubei          114.4800       30.5000          118       178     2012      03        16        076              0.205304      12.539642       1.466705       0.376212   -9999.000000   -9999.000000   -9999.000000   -9999.000000
57492     57492     hubei          114.4800       30.5000          118       178     2012      03        17        077              0.208750      11.181824       2.352342       0.370439   -9999.000000   -9999.000000   -9999.000000   -9999.000000
57492     57492     hubei          114.4800       30.5000          118       178     2012      03        18        078              0.206125      12.109192       4.074171       0.373389   -9999.000000   -9999.000000       0.113000       1.000000
57492     57492     hubei          114.4800       30.5000          118       178     2012      03        19        079              0.205583      16.226349       0.528244       0.367295   -9999.000000   -9999.000000       0.133900   -9999.000000
57492     57492     hubei          114.4800       30.5000          118       178     2012      03        20        080              0.205826       9.421570       0.263066       0.367706   -9999.000000   -9999.000000       0.134500       0.525000
57492     57492     hubei          114.4800       30.5000          118       178     2012      03        21        081              0.206792       9.163971      12.368851       0.367388   -9999.000000   -9999.000000       0.139500   -9999.000000
57492     57492     hubei          114.4800       30.5000          118       178     2012      03        22        082              0.369000      11.809357      37.496986       0.376543   -9999.000000   -9999.000000   -9999.000000   -9999.000000
57492     57492     hubei          114.4800       30.5000          118       178     2012      03        23        083              0.318375       8.242432       0.713756       0.409523   -9999.000000   -9999.000000   -9999.000000       1.000000
57492     57492     hubei          114.4800       30.5000          118       178     2012      03        24        084              0.223083      12.468567       0.000000       0.385461   -9999.000000   -9999.000000   -9999.000000   -9999.000000
57492     57492     hubei          114.4800       30.5000          118       178     2012      03        25        085              0.000000      14.760406       0.000000       0.377194   -9999.000000   -9999.000000       0.116600       0.491000
57492     57492     hubei          114.4800       30.5000          118       178     2012      03        26        086              0.220333      16.777222       0.000000       0.373574   -9999.000000   -9999.000000       0.165400   -9999.000000
57492     57492     hubei          114.4800       30.5000          118       178     2012      03        27        087              0.221625      18.748871       0.730520       0.370724   -9999.000000   -9999.000000       0.161000       1.000000
57492     57492     hubei          114.4800       30.5000          118       178     2012      03        28        088              0.220667      19.905670       0.320269       0.369646   -9999.000000   -9999.000000   -9999.000000       0.531000
57492     57492     hubei          114.4800       30.5000          118       178     2012      03        29        089              0.224000      20.643219       8.091095       0.367692   -9999.000000   -9999.000000   -9999.000000   -9999.000000
57492     57492     hubei          114.4800       30.5000          118       178     2012      03        30        090              0.250458      18.030487       4.555607       0.378022   -9999.000000   -9999.000000       0.103700       0.575000
57492     57492     hubei          114.4800       30.5000          118       178     2012      03        31        091              0.230292      15.818542       0.000000       0.383410   -9999.000000   -9999.000000       0.165400   -9999.000000
57492     57492     hubei          114.4800       30.5000          118       178     2012      04        01        092              0.227833      17.987549       0.000000       0.370319   -9999.000000   -9999.000000       0.160000       0.857000
57492     57492     hubei          114.4800       30.5000          118       178     2012      04        02        093              0.225000      20.002533       0.000000       0.365876   -9999.000000   -9999.000000   -9999.000000   -9999.000000
57492     57492     hubei          114.4800       30.5000          118       178     2012      04        03        094              0.222708      19.928650       0.811536       0.362629   -9999.000000   -9999.000000   -9999.000000   -9999.000000
57492     57492     hubei          114.4800       30.5000          118       178     2012      04        04        095              0.226542      17.789795       6.857636       0.362105   -9999.000000   -9999.000000       0.128500       1.000000
57492     57492     hubei          114.4800       30.5000          118       178     2012      04        05        096              0.225333      14.660095       0.338243       0.377190   -9999.000000   -9999.000000       0.136500   -9999.000000
57492     57492     hubei          114.4800       30.5000          118       178     2012      04        06        097              0.223625      18.605438       3.350069       0.367837   -9999.000000   -9999.000000       0.161700       0.428000
57492     57492     hubei          114.4800       30.5000          118       178     2012      04        07        098              0.222000      20.829987       0.000000       0.362871   -9999.000000   -9999.000000       0.144500   -9999.000000
57492     57492     hubei          114.4800       30.5000          118       178     2012      04        08        099              0.220625      21.744202       0.419098       0.359064   -9999.000000   -9999.000000   -9999.000000       1.000000
57492     57492     hubei          114.4800       30.5000          118       178     2012      04        09        100              0.222750      19.760284       4.919250       0.359376   -9999.000000   -9999.000000   -9999.000000       1.000000
57492     57492     hubei          114.4800       30.5000          118       178     2012      04        10        101              0.226542      18.622253       8.159407       0.370717   -9999.000000   -9999.000000       0.052700   -9999.000000
57492     57492     hubei          114.4800       30.5000          118       178     2012      04        11        102              0.227375      19.909607       0.530664       0.377463   -9999.000000   -9999.000000       0.160100       1.000000
57492     57492     hubei          114.4800       30.5000          118       178     2012      04        12        103              0.231542      21.544220      11.502500       0.368366   -9999.000000   -9999.000000       0.153800   -9999.000000
57492     57492     hubei          114.4800       30.5000          118       178     2012      04        13        104              0.231125      16.418091       0.698442       0.382178   -9999.000000   -9999.000000       0.135400       0.550000
57492     57492     hubei          114.4800       30.5000          118       178     2012      04        14        105              0.228696      18.301880       0.106142       0.369068   -9999.000000   -9999.000000   -9999.000000   -9999.000000
57492     57492     hubei          114.4800       30.5000          118       178     2012      04        15        106              0.226833      16.415344       0.723061       0.367369   -9999.000000   -9999.000000   -9999.000000   -9999.000000
57492     57492     hubei          114.4800       30.5000          118       178     2012      04        16        107              0.228625      18.150055       0.390501       0.364747   -9999.000000   -9999.000000       0.108600       1.000000
57492     57492     hubei          114.4800       30.5000          118       178     2012      04        17        108              0.229000      21.375031       0.043501       0.361334   -9999.000000   -9999.000000       0.176500   -9999.000000
57492     57492     hubei          114.4800       30.5000          118       178     2012      04        18        109              0.228833      20.838165       1.871481       0.360731   -9999.000000   -9999.000000   -9999.000000       0.549000
57492     57492     hubei          114.4800       30.5000          118       178     2012      04        19        110              0.234750      20.377441       0.250252       0.359843   -9999.000000   -9999.000000   -9999.000000   -9999.000000
57492     57492     hubei          114.4800       30.5000          118       178     2012      04        20        111              0.236375      24.048981       0.250104       0.354882   -9999.000000   -9999.000000   -9999.000000   -9999.000000
57492     57492     hubei          114.4800       30.5000          118       178     2012      04        21        112              0.236208      18.971313       1.489844       0.357201   -9999.000000   -9999.000000       0.104900       1.000000
57492     57492     hubei          114.4800       30.5000          118       178     2012      04        22        113              0.234792      22.321991       6.079509       0.352373   -9999.000000   -9999.000000       0.138800   -9999.000000
57492     57492     hubei          114.4800       30.5000          118       178     2012      04        23        114              0.236917      25.227936      15.990479       0.356474       0.229000   -9999.000000       0.202500       0.666000
57492     57492     hubei          114.4800       30.5000          118       178     2012      04        24        115              0.244875      25.476990      17.138477       0.379490   -9999.000000   -9999.000000       0.240800   -9999.000000
57492     57492     hubei          114.4800       30.5000          118       178     2012      04        25        116              0.000000      21.868896       1.268652       0.392747   -9999.000000   -9999.000000   -9999.000000       1.000000
57492     57492     hubei          114.4800       30.5000          118       178     2012      04        26        117              0.238958      20.566711       0.265885       0.372908   -9999.000000   -9999.000000   -9999.000000       0.672000
57492     57492     hubei          114.4800       30.5000          118       178     2012      04        27        118              0.236250      22.935150       0.481055       0.362344   -9999.000000   -9999.000000   -9999.000000   -9999.000000
57492     57492     hubei          114.4800       30.5000          118       178     2012      04        28        119              0.236625      25.033783      17.459278       0.357925   -9999.000000   -9999.000000       0.196900       0.697000
57492     57492     hubei          114.4800       30.5000          118       178     2012      04        29        120              0.239458      25.795349       0.341829       0.380079   -9999.000000   -9999.000000       0.206100   -9999.000000
57492     57492     hubei          114.4800       30.5000          118       178     2012      04        30        121              0.247875      25.064026      17.756300       0.370994   -9999.000000   -9999.000000       0.185600       1.000000
57492     57492     hubei          114.4800       30.5000          118       178     2012      05        01        122              0.247375      23.322479       0.239666       0.390505   -9999.000000   -9999.000000   -9999.000000   -9999.000000
57492     57492     hubei          114.4800       30.5000          118       178     2012      05        02        123              0.245083      22.814575       5.067616       0.374727   -9999.000000   -9999.000000       0.164100   -9999.000000
57492     57492     hubei          114.4800       30.5000          118       178     2012      05        03        124              0.245792      23.131653       0.964525       0.374493   -9999.000000   -9999.000000       0.129600       0.966000
57492     57492     hubei          114.4800       30.5000          118       178     2012      05        04        125              0.256000      23.042175       0.667954       0.375684   -9999.000000   -9999.000000       0.148400   -9999.000000
57492     57492     hubei          114.4800       30.5000          118       178     2012      05        05        126              0.257667      25.099487       0.218570       0.368659   -9999.000000   -9999.000000       0.144900       0.723000
57492     57492     hubei          114.4800       30.5000          118       178     2012      05        06        127              0.253167      27.084045       0.000000       0.363567   -9999.000000   -9999.000000   -9999.000000   -9999.000000
57492     57492     hubei          114.4800       30.5000          118       178     2012      05        07        128              0.301250      28.490601      30.788082       0.359334   -9999.000000   -9999.000000   -9999.000000       1.000000
57492     57492     hubei          114.4800       30.5000          118       178     2012      05        08        129              0.278333      27.450226       0.335706       0.389689       0.282000   -9999.000000       0.161300       0.954000
57492     57492     hubei          114.4800       30.5000          118       178     2012      05        09        130              0.270583      27.897919       0.408289       0.380214       0.383000   -9999.000000       0.192300   -9999.000000
57492     57492     hubei          114.4800       30.5000          118       178     2012      05        10        131              0.266458      24.177277       0.000000       0.373805   -9999.000000   -9999.000000       0.192600       1.000000
57492     57492     hubei          114.4800       30.5000          118       178     2012      05        11        132              0.262167      27.620605       0.000000       0.365844   -9999.000000   -9999.000000       0.219800   -9999.000000
57492     57492     hubei          114.4800       30.5000          118       178     2012      05        12        133              0.260083      28.822083       8.239258       0.362378       0.249000   -9999.000000   -9999.000000       0.986000
57492     57492     hubei          114.4800       30.5000          118       178     2012      05        13        134              0.263417      24.251343      14.125702       0.376540       0.360000   -9999.000000   -9999.000000   -9999.000000
57492     57492     hubei          114.4800       30.5000          118       178     2012      05        14        135              0.305042      25.182831       8.393648       0.379453   -9999.000000   -9999.000000       0.078300   -9999.000000
57492     57492     hubei          114.4800       30.5000          118       178     2012      05        15        136              0.277333      21.190948       1.408778       0.390093   -9999.000000   -9999.000000       0.239100       1.000000
57492     57492     hubei          114.4800       30.5000          118       178     2012      05        16        137              0.269750      22.448120       0.083414       0.375457   -9999.000000   -9999.000000       0.226500   -9999.000000
57492     57492     hubei          114.4800       30.5000          118       178     2012      05        17        138              0.265417      25.437561       0.000000       0.368159   -9999.000000   -9999.000000   -9999.000000       0.501000
57492     57492     hubei          114.4800       30.5000          118       178     2012      05        18        139              0.268500      27.550079      22.710560       0.363609   -9999.000000   -9999.000000   -9999.000000   -9999.000000
57492     57492     hubei          114.4800       30.5000          118       178     2012      05        19        140              0.294958      25.357635       0.826667       0.378165   -9999.000000   -9999.000000       0.232500   -9999.000000
57492     57492     hubei          114.4800       30.5000          118       178     2012      05        20        141              0.273125      25.069611       0.986127       0.383767   -9999.000000   -9999.000000       0.178400       1.000000
57492     57492     hubei          114.4800       30.5000          118       178     2012      05        21        142              0.268125      25.573181       2.716723       0.370672   -9999.000000   -9999.000000       0.187800   -9999.000000
57492     57492     hubei          114.4800       30.5000          118       178     2012      05        22        143              0.268292      26.394531       9.911572       0.365808       0.254000   -9999.000000       0.225000       1.000000
57492     57492     hubei          114.4800       30.5000          118       178     2012      05        23        144              0.273708      24.740906      11.827191       0.377894   -9999.000000   -9999.000000   -9999.000000   -9999.000000
57492     57492     hubei          114.4800       30.5000          118       178     2012      05        24        145              0.276375      23.349182       2.504920       0.386401       0.393000   -9999.000000   -9999.000000       0.774000
57492     57492     hubei          114.4800       30.5000          118       178     2012      05        25        146              0.000000      23.611847       2.193299       0.381262   -9999.000000   -9999.000000       0.094200       1.000000
57492     57492     hubei          114.4800       30.5000          118       178     2012      05        26        147              0.275333      24.507935       0.000000       0.376509   -9999.000000   -9999.000000       0.199300   -9999.000000
57492     57492     hubei          114.4800       30.5000          118       178     2012      05        27        148              0.272917      25.827209       0.000000       0.370508   -9999.000000   -9999.000000       0.188500       0.211000
57492     57492     hubei          114.4800       30.5000          118       178     2012      05        28        149              0.270250      27.866364      11.704868       0.365914       0.282000   -9999.000000       0.186700   -9999.000000
57492     57492     hubei          114.4800       30.5000          118       178     2012      05        29        150              0.352542      29.180328      62.028507       0.369220   -9999.000000   -9999.000000   -9999.000000       1.000000
57492     57492     hubei          114.4800       30.5000          118       178     2012      05        30        151              0.286042      22.820953       0.349276       0.431229   -9999.000000   -9999.000000   -9999.000000   -9999.000000
57492     57492     hubei          114.4800       30.5000          118       178     2012      05        31        152              0.277292      26.439087       0.000000       0.398952   -9999.000000   -9999.000000   -9999.000000   -9999.000000
57492     57492     hubei          114.4800       30.5000          118       178     2012      06        01        153              0.275333      26.986206       3.490695       0.388177   -9999.000000   -9999.000000       0.208800       1.000000
57492     57492     hubei          114.4800       30.5000          118       178     2012      06        02        154              0.273292      24.113770       0.844754       0.388757   -9999.000000   -9999.000000       0.194300   -9999.000000
57492     57492     hubei          114.4800       30.5000          118       178     2012      06        03        155              0.270875      26.907074       2.139154       0.380520       0.417000   -9999.000000   -9999.000000       0.568000
57492     57492     hubei          114.4800       30.5000          118       178     2012      06        04        156              0.269875      26.037537       0.887403       0.378841       0.437000   -9999.000000   -9999.000000   -9999.000000
57492     57492     hubei          114.4800       30.5000          118       178     2012      06        05        157              0.267750      26.207855       2.057459       0.377466   -9999.000000   -9999.000000       0.239600       1.000000
57492     57492     hubei          114.4800       30.5000          118       178     2012      06        06        158              0.270417      27.929779       1.901759       0.374431   -9999.000000   -9999.000000       0.186700       1.000000
57492     57492     hubei          114.4800       30.5000          118       178     2012      06        07        159              0.268917      26.404083       0.000000       0.378506       0.254000   -9999.000000       0.201400   -9999.000000
57492     57492     hubei          114.4800       30.5000          118       178     2012      06        08        160              0.265708      29.406036       0.309683       0.370843       0.291000   -9999.000000       0.200700       1.000000
57492     57492     hubei          114.4800       30.5000          118       178     2012      06        09        161              0.261042      30.080109       0.422880       0.367173       0.302000   -9999.000000   -9999.000000   -9999.000000
57492     57492     hubei          114.4800       30.5000          118       178     2012      06        10        162              0.256542      31.586761       1.524152       0.363594   -9999.000000   -9999.000000   -9999.000000       0.446000
57492     57492     hubei          114.4800       30.5000          118       178     2012      06        11        163              0.000000      28.500610      11.580147       0.367260   -9999.000000   -9999.000000       0.060200   -9999.000000
57492     57492     hubei          114.4800       30.5000          118       178     2012      06        12        164              0.248333      28.906067       4.147219       0.361621       0.240000   -9999.000000       0.194200   -9999.000000
57492     57492     hubei          114.4800       30.5000          118       178     2012      06        13        165              0.239167      29.681580       0.110302       0.355467   -9999.000000   -9999.000000       0.196900       1.000000
57492     57492     hubei          114.4800       30.5000          118       178     2012      06        14        166              0.228458      30.669373       1.673316       0.350716       0.365000   -9999.000000       0.203700   -9999.000000
57492     57492     hubei          114.4800       30.5000          118       178     2012      06        15        167              0.220833      29.379639       0.481054       0.353186   -9999.000000   -9999.000000   -9999.000000       0.501000
57492     57492     hubei          114.4800       30.5000          118       178     2012      06        16        168              0.212833      29.581696       0.649676       0.348579   -9999.000000   -9999.000000   -9999.000000   -9999.000000
57492     57492     hubei          114.4800       30.5000          118       178     2012      06        17        169              0.206958      30.032776       0.000000       0.343916   -9999.000000   -9999.000000       0.101000   -9999.000000
57492     57492     hubei          114.4800       30.5000          118       178     2012      06        18        170              0.202667      29.359375       0.258217       0.340742       0.270000   -9999.000000       0.265200       1.000000
57492     57492     hubei          114.4800       30.5000          118       178     2012      06        19        171              0.198625      30.528564       1.071838       0.338538       0.296000   -9999.000000       0.265000   -9999.000000
57492     57492     hubei          114.4800       30.5000          118       178     2012      06        20        172              0.193875      31.153595       3.334487       0.336094       0.349000   -9999.000000   -9999.000000       0.079000
57492     57492     hubei          114.4800       30.5000          118       178     2012      06        21        173              0.188292      31.351196       0.298991       0.333090   -9999.000000   -9999.000000   -9999.000000   -9999.000000
57492     57492     hubei          114.4800       30.5000          118       178     2012      06        22        174              0.181833      31.566376       0.457340       0.331594   -9999.000000   -9999.000000       0.260700       0.722000
57492     57492     hubei          114.4800       30.5000          118       178     2012      06        23        175              0.175042      30.396912       1.534853       0.331107       0.230000   -9999.000000       0.223100       0.681000
57492     57492     hubei          114.4800       30.5000          118       178     2012      06        24        176              0.167833      30.807892       0.326926       0.328497       0.247000   -9999.000000       0.235900   -9999.000000
57492     57492     hubei          114.4800       30.5000          118       178     2012      06        25        177              0.161875      31.675751       0.171775       0.325003       0.311000   -9999.000000       0.196800       0.058000
57492     57492     hubei          114.4800       30.5000          118       178     2012      06        26        178              0.162875      31.424194      56.764519       0.326135   -9999.000000   -9999.000000   -9999.000000   -9999.000000
57492     57492     hubei          114.4800       30.5000          118       178     2012      06        27        179              0.344708      28.878754      53.745445       0.392512       0.385000   -9999.000000   -9999.000000       1.000000
57492     57492     hubei          114.4800       30.5000          118       178     2012      06        28        180              0.358217      28.352539      21.111320       0.419664       0.368500   -9999.000000       0.082500   -9999.000000
57492     57492     hubei          114.4800       30.5000          118       178     2012      06        29        181              0.297750      29.224884      10.395893       0.403257       0.367000   -9999.000000       0.208800   -9999.000000
57492     57492     hubei          114.4800       30.5000          118       178     2012      06        30        182              0.276250      32.720551       3.291943       0.377940       0.389000   -9999.000000       0.166300   -9999.000000
57492     57492     hubei          114.4800       30.5000          118       178     2012      07        01        183              0.269773      31.665558       0.000000       0.377038   -9999.000000   -9999.000000       0.207400   -9999.000000
57492     57492     hubei          114.4800       30.5000          118       178     2012      07        02        184              0.262542      32.134705       7.156191       0.372725   -9999.000000   -9999.000000   -9999.000000       1.000000
57492     57492     hubei          114.4800       30.5000          118       178     2012      07        03        185              0.246875      32.689240       0.000000       0.366875       0.378000   -9999.000000   -9999.000000   -9999.000000
57492     57492     hubei          114.4800       30.5000          118       178     2012      07        04        186              0.233667      33.377167       0.000000       0.363045       0.346000   -9999.000000       0.194300       1.000000
57492     57492     hubei          114.4800       30.5000          118       178     2012      07        05        187              0.225750      33.143066       1.341322       0.361051       0.330000   -9999.000000       0.285700       0.740000
57492     57492     hubei          114.4800       30.5000          118       178     2012      07        06        188              0.214458      32.202118       1.160752       0.361006   -9999.000000   -9999.000000       0.317500   -9999.000000
57492     57492     hubei          114.4800       30.5000          118       178     2012      07        07        189              0.199667      33.994110       0.000000       0.355844   -9999.000000   -9999.000000   -9999.000000       1.000000
57492     57492     hubei          114.4800       30.5000          118       178     2012      07        08        190              0.186750      33.912292       0.000000       0.351534       0.325000   -9999.000000   -9999.000000   -9999.000000
57492     57492     hubei          114.4800       30.5000          118       178     2012      07        09        191              0.175500      33.675568       0.245595       0.347729       0.325000   -9999.000000       0.159900       0.427000
57492     57492     hubei          114.4800       30.5000          118       178     2012      07        10        192              0.165958      33.318726       1.429847       0.345660       0.371000   -9999.000000       0.215100   -9999.000000
57492     57492     hubei          114.4800       30.5000          118       178     2012      07        11        193              0.154958      33.592926       0.705481       0.345150       0.404000   -9999.000000       0.230200   -9999.000000
57492     57492     hubei          114.4800       30.5000          118       178     2012      07        12        194              0.220625      34.076752      23.319986       0.342181   -9999.000000   -9999.000000       0.214200       1.000000
57492     57492     hubei          114.4800       30.5000          118       178     2012      07        13        195              0.363950      29.202209      97.664886       0.380415       0.478000   -9999.000000   -9999.000000   -9999.000000
57492     57492     hubei          114.4800       30.5000          118       178     2012      07        14        196              0.298458      27.658783       0.160516       0.432741   -9999.000000   -9999.000000   -9999.000000       0.882000
57492     57492     hubei          114.4800       30.5000          118       178     2012      07        15        197              0.257542      29.824554       0.000000       0.391927       0.365000   -9999.000000       0.078700   -9999.000000
57492     57492     hubei          114.4800       30.5000          118       178     2012      07        16        198              0.250208      30.405853      12.816041       0.383566       0.418000   -9999.000000       0.369700   -9999.000000
57492     57492     hubei          114.4800       30.5000          118       178     2012      07        17        199              0.249958      31.119476       2.255764       0.377959       0.464000   -9999.000000       0.356900       1.000000
57492     57492     hubei          114.4800       30.5000          118       178     2012      07        18        200              0.249500      31.433594      11.624471       0.374205   -9999.000000   -9999.000000       0.354900   -9999.000000
57492     57492     hubei          114.4800       30.5000          118       178     2012      07        19        201              0.243042      31.522858       1.573305       0.370428       0.419000   -9999.000000   -9999.000000       0.380000
57492     57492     hubei          114.4800       30.5000          118       178     2012      07        20        202              0.231917      31.636139       1.101137       0.369764       0.386500   -9999.000000       0.349000   -9999.000000
57492     57492     hubei          114.4800       30.5000          118       178     2012      07        21        203              0.219364      32.958557       0.447188       0.367156       0.340000   -9999.000000       0.249700       1.000000
57492     57492     hubei          114.4800       30.5000          118       178     2012      07        22        204              0.208167      34.381409       3.575122       0.362147       0.360000   -9999.000000       0.319300       0.747000
57492     57492     hubei          114.4800       30.5000          118       178     2012      07        23        205              0.195583      33.678772       0.294397       0.365557   -9999.000000   -9999.000000       0.373600   -9999.000000
57492     57492     hubei          114.4800       30.5000          118       178     2012      07        24        206              0.183583      33.681580       1.029782       0.357947       0.304000   -9999.000000   -9999.000000       0.747000
57492     57492     hubei          114.4800       30.5000          118       178     2012      07        25        207              0.171542      34.024475       0.548012       0.354513       0.282000   -9999.000000   -9999.000000   -9999.000000
57492     57492     hubei          114.4800       30.5000          118       178     2012      07        26        208              0.167542      33.821136       1.172948       0.349644       0.272000   -9999.000000       0.189500       0.441000
57492     57492     hubei          114.4800       30.5000          118       178     2012      07        27        209              0.164250      33.781738       7.600854       0.347876       0.287000   -9999.000000       0.312100   -9999.000000
57492     57492     hubei          114.4800       30.5000          118       178     2012      07        28        210              0.159750      33.817169       0.000000       0.342680   -9999.000000   -9999.000000       0.310300   -9999.000000
57492     57492     hubei          114.4800       30.5000          118       178     2012      07        29        211              0.154250      33.776031       0.419196       0.340017   -9999.000000   -9999.000000       0.319800       0.751000
57492     57492     hubei          114.4800       30.5000          118       178     2012      07        30        212              0.147667      34.498413       0.968839       0.336748       0.312000   -9999.000000   -9999.000000   -9999.000000
57492     57492     hubei          114.4800       30.5000          118       178     2012      07        31        213              0.141333      34.592651       0.428411       0.337223       0.288000   -9999.000000   -9999.000000       0.594000
57492     57492     hubei          114.4800       30.5000          118       178     2012      08        01        214              0.134833      34.789276       0.746225       0.331636       0.309000   -9999.000000       0.113100   -9999.000000
57492     57492     hubei          114.4800       30.5000          118       178     2012      08        02        215              0.128250      33.779816       0.939289       0.327684       0.369000   -9999.000000       0.347100       0.928000
57492     57492     hubei          114.4800       30.5000          118       178     2012      08        03        216              0.123208      32.459656       0.804146       0.328597   -9999.000000   -9999.000000       0.357100       0.498000
57492     57492     hubei          114.4800       30.5000          118       178     2012      08        04        217              0.144000      31.882172       7.293733       0.326156       0.389000   -9999.000000   -9999.000000   -9999.000000
57492     57492     hubei          114.4800       30.5000          118       178     2012      08        05        218              0.166833      32.084045       0.898037       0.344546       0.300000   -9999.000000   -9999.000000       1.000000
57492     57492     hubei          114.4800       30.5000          118       178     2012      08        06        219              0.157167      32.976410       0.378332       0.339659       0.372500   -9999.000000       0.294900   -9999.000000
57492     57492     hubei          114.4800       30.5000          118       178     2012      08        07        220              0.200917      33.141083       0.000000       0.331976       0.342000   -9999.000000   -9999.000000       0.433000
57492     57492     hubei          114.4800       30.5000          118       178     2012      08        08        221              0.242167      32.743195       0.529767       0.326132   -9999.000000   -9999.000000       0.276300   -9999.000000
57492     57492     hubei          114.4800       30.5000          118       178     2012      08        09        222              0.241000      32.339752       3.150022       0.322923       0.399000   -9999.000000       0.318000   -9999.000000
57492     57492     hubei          114.4800       30.5000          118       178     2012      08        10        223              0.241042      30.182220       5.470058       0.335304       0.448000   -9999.000000   -9999.000000       1.000000
57492     57492     hubei          114.4800       30.5000          118       178     2012      08        11        224              0.242625      28.909729      10.722302       0.349396       0.437000   -9999.000000   -9999.000000   -9999.000000
57492     57492     hubei          114.4800       30.5000          118       178     2012      08        12        225              0.247708      30.402405       7.388964       0.363786       0.442000   -9999.000000       0.180700       0.845000
57492     57492     hubei          114.4800       30.5000          118       178     2012      08        13        226              0.247417      31.795319       7.235864       0.361562       0.478000   -9999.000000       0.311300   -9999.000000
57492     57492     hubei          114.4800       30.5000          118       178     2012      08        14        227              0.246500      29.506805       1.224165       0.367226   -9999.000000   -9999.000000       0.241200   -9999.000000
57492     57492     hubei          114.4800       30.5000          118       178     2012      08        15        228              0.245042      30.123810       0.000000       0.363436       0.400000   -9999.000000       0.272000       1.000000
57492     57492     hubei          114.4800       30.5000          118       178     2012      08        16        229              0.243167      31.656189       0.000000       0.351330       0.372500   -9999.000000   -9999.000000   -9999.000000
57492     57492     hubei          114.4800       30.5000          118       178     2012      08        17        230              0.241000      31.669037       0.000000       0.344402       0.404500   -9999.000000   -9999.000000       0.179000
57492     57492     hubei          114.4800       30.5000          118       178     2012      08        18        231              0.239250      33.457428      19.835443       0.338522       0.392000   -9999.000000       0.123000   -9999.000000
57492     57492     hubei          114.4800       30.5000          118       178     2012      08        19        232              0.238208      34.176086       4.047794       0.332817   -9999.000000   -9999.000000       0.288300       1.000000
57492     57492     hubei          114.4800       30.5000          118       178     2012      08        20        233              0.237042      33.337616       4.434519       0.340194       0.380000   -9999.000000       0.225200       0.703000
57492     57492     hubei          114.4800       30.5000          118       178     2012      08        21        234              0.253958      32.555206       0.443079       0.340388       0.450500   -9999.000000   -9999.000000   -9999.000000
57492     57492     hubei          114.4800       30.5000          118       178     2012      08        22        235              0.252250      27.872803       1.984243       0.342707       0.438000   -9999.000000   -9999.000000   -9999.000000
57492     57492     hubei          114.4800       30.5000          118       178     2012      08        23        236              0.251292      25.577454       0.099700       0.342970       0.454000   -9999.000000       0.229700   -9999.000000
57492     57492     hubei          114.4800       30.5000          118       178     2012      08        24        237              0.249583      26.225128       0.000000       0.340239   -9999.000000   -9999.000000       0.225900       0.765000
57492     57492     hubei          114.4800       30.5000          118       178     2012      08        25        238              0.000000      27.457214       0.592894       0.335388   -9999.000000   -9999.000000       0.234700   -9999.000000
57492     57492     hubei          114.4800       30.5000          118       178     2012      08        26        239              0.248667      30.435364       6.201741       0.330620       0.451000   -9999.000000       0.234400   -9999.000000
57492     57492     hubei          114.4800       30.5000          118       178     2012      08        27        240              0.250000      29.318512      18.682722       0.346126   -9999.000000   -9999.000000   -9999.000000       0.966000
57492     57492     hubei          114.4800       30.5000          118       178     2012      08        28        241              0.248750      27.282593       1.354037       0.378416       0.432000   -9999.000000   -9999.000000   -9999.000000
57492     57492     hubei          114.4800       30.5000          118       178     2012      08        29        242              0.246833      29.654266       0.874763       0.355461       0.460000   -9999.000000       0.068800       0.498000
57492     57492     hubei          114.4800       30.5000          118       178     2012      08        30        243              0.245042      30.936768       3.404720       0.345533   -9999.000000   -9999.000000       0.236500   -9999.000000
57492     57492     hubei          114.4800       30.5000          118       178     2012      08        31        244              0.242750      31.387268       0.000000       0.339803       0.407000   -9999.000000       0.228000       1.000000
57492     57492     hubei          114.4800       30.5000          118       178     2012      09        01        245              0.240500      32.245148       0.888204       0.333452       0.397000   -9999.000000       0.237000       0.820000
57492     57492     hubei          114.4800       30.5000          118       178     2012      09        02        246              0.256500      32.927521      32.216503       0.328886       0.460000   -9999.000000   -9999.000000   -9999.000000
57492     57492     hubei          114.4800       30.5000          118       178     2012      09        03        247              0.257792      27.034576       0.147673       0.428933   -9999.000000   -9999.000000   -9999.000000       1.000000
57492     57492     hubei          114.4800       30.5000          118       178     2012      09        04        248              0.255000      27.507812       0.000000       0.357096   -9999.000000   -9999.000000       0.188700   -9999.000000
57492     57492     hubei          114.4800       30.5000          118       178     2012      09        05        249              0.252375      27.817596       0.000000       0.347259   -9999.000000   -9999.000000       0.302400       0.330000
57492     57492     hubei          114.4800       30.5000          118       178     2012      09        06        250              0.250292      28.470459       0.232777       0.338793       0.290000   -9999.000000       0.299300   -9999.000000
57492     57492     hubei          114.4800       30.5000          118       178     2012      09        07        251              0.248458      28.743042       0.283126       0.336168       0.408500   -9999.000000   -9999.000000   -9999.000000
57492     57492     hubei          114.4800       30.5000          118       178     2012      09        08        252              0.247500      30.125793      63.150181       0.333440       0.451000   -9999.000000   -9999.000000       1.000000
57492     57492     hubei          114.4800       30.5000          118       178     2012      09        09        253              0.253875      27.961761       0.403329       0.369971       0.496000   -9999.000000       0.250700   -9999.000000
57492     57492     hubei          114.4800       30.5000          118       178     2012      09        10        254              0.253375      25.476379       1.519067       0.392732   -9999.000000   -9999.000000       0.259100       0.692000
57492     57492     hubei          114.4800       30.5000          118       178     2012      09        11        255              0.254083      27.903809      10.206715       0.366723   -9999.000000   -9999.000000       0.347400   -9999.000000
57492     57492     hubei          114.4800       30.5000          118       178     2012      09        12        256              0.258292      28.626190      22.090916       0.372030       0.412000   -9999.000000       0.322900   -9999.000000
57492     57492     hubei          114.4800       30.5000          118       178     2012      09        13        257              0.262913      23.120514       0.515323       0.393725   -9999.000000   -9999.000000   -9999.000000       1.000000
57492     57492     hubei          114.4800       30.5000          118       178     2012      09        14        258              0.260750      21.710785       0.000000       0.373415   -9999.000000   -9999.000000   -9999.000000   -9999.000000
57492     57492     hubei          114.4800       30.5000          118       178     2012      09        15        259              0.258417      24.154297       0.000000       0.360473   -9999.000000   -9999.000000       0.025700       0.655000
57492     57492     hubei          114.4800       30.5000          118       178     2012      09        16        260              0.255708      24.569244       0.263946       0.352858   -9999.000000   -9999.000000       0.266200   -9999.000000
57492     57492     hubei          114.4800       30.5000          118       178     2012      09        17        261              0.253583      24.529449       0.451863       0.348353   -9999.000000   -9999.000000       0.268000       1.000000
57492     57492     hubei          114.4800       30.5000          118       178     2012      09        18        262              0.251708      24.734802       1.706504       0.345766   -9999.000000   -9999.000000       0.222700       0.878000
57492     57492     hubei          114.4800       30.5000          118       178     2012      09        19        263              0.249792      25.138672       3.234647       0.343307   -9999.000000   -9999.000000   -9999.000000   -9999.000000
57492     57492     hubei          114.4800       30.5000          118       178     2012      09        20        264              0.247792      26.275177       0.863122       0.339718   -9999.000000   -9999.000000       0.245700       1.000000
57492     57492     hubei          114.4800       30.5000          118       178     2012      09        21        265              0.247000      27.173492       1.649999       0.338305   -9999.000000   -9999.000000       0.188300   -9999.000000
57492     57492     hubei          114.4800       30.5000          118       178     2012      09        22        266              0.246333      22.960968       0.936945       0.347819   -9999.000000   -9999.000000       0.255000       1.000000
57492     57492     hubei          114.4800       30.5000          118       178     2012      09        23        267              0.246000      25.954590       0.388919       0.343084       0.329000   -9999.000000       0.239800   -9999.000000
57492     57492     hubei          114.4800       30.5000          118       178     2012      09        24        268              0.244333      25.697479       0.654843       0.343348       0.327000   -9999.000000   -9999.000000   -9999.000000
57492     57492     hubei          114.4800       30.5000          118       178     2012      09        25        269              0.242458      27.073425       0.238992       0.339137   -9999.000000   -9999.000000   -9999.000000       0.903000
57492     57492     hubei          114.4800       30.5000          118       178     2012      09        26        270              0.241250      27.072296       0.000000       0.335820   -9999.000000   -9999.000000       0.163800   -9999.000000
57492     57492     hubei          114.4800       30.5000          118       178     2012      09        27        271              0.240429      26.045074       0.615832       0.336501   -9999.000000   -9999.000000       0.230400       0.432000
57492     57492     hubei          114.4800       30.5000          118       178     2012      09        28        272              0.238188      26.683533       0.458130       0.334212   -9999.000000   -9999.000000       0.230900   -9999.000000
57492     57492     hubei          114.4800       30.5000          118       178     2012      09        29        273              0.237333      22.855560       0.117113       0.329376   -9999.000000   -9999.000000       0.294700       1.000000
57492     57492     hubei          114.4800       30.5000          118       178     2012      09        30        274              0.237000      22.359375       0.000000       0.328020   -9999.000000   -9999.000000   -9999.000000       0.710000
57492     57492     hubei          114.4800       30.5000          118       178     2012      10        01        275              0.236083      21.762360       0.391586       0.328932   -9999.000000   -9999.000000   -9999.000000   -9999.000000
57492     57492     hubei          114.4800       30.5000          118       178     2012      10        02        276              0.235708      22.452240       1.184785       0.327595   -9999.000000   -9999.000000       0.027600       1.000000
57492     57492     hubei          114.4800       30.5000          118       178     2012      10        03        277              0.235000      23.382904       0.468370       0.325764   -9999.000000   -9999.000000       0.180100   -9999.000000
57492     57492     hubei          114.4800       30.5000          118       178     2012      10        04        278              0.235000      23.349731       0.324132       0.326735   -9999.000000   -9999.000000       0.188500       0.301000
57492     57492     hubei          114.4800       30.5000          118       178     2012      10        05        279              0.235000      24.351013       4.100712       0.325873   -9999.000000   -9999.000000   -9999.000000   -9999.000000
57492     57492     hubei          114.4800       30.5000          118       178     2012      10        06        280              0.235000      21.392548       0.000000       0.341044   -9999.000000   -9999.000000   -9999.000000   -9999.000000
57492     57492     hubei          114.4800       30.5000          118       178     2012      10        07        281              0.235000      24.036407       0.687627       0.335355   -9999.000000   -9999.000000       0.192900       1.000000
57492     57492     hubei          114.4800       30.5000          118       178     2012      10        08        282              0.235000      22.679565       0.108834       0.337595   -9999.000000   -9999.000000       0.139000   -9999.000000
57492     57492     hubei          114.4800       30.5000          118       178     2012      10        09        283              0.235000      23.926331       2.192219       0.334134   -9999.000000   -9999.000000       0.144600       0.450000
57492     57492     hubei          114.4800       30.5000          118       178     2012      10        10        284              0.235000      23.918030       0.310962       0.330277   -9999.000000   -9999.000000       0.159900   -9999.000000
57492     57492     hubei          114.4800       30.5000          118       178     2012      10        11        285              0.235000      23.444305       0.879412       0.327374   -9999.000000   -9999.000000   -9999.000000   -9999.000000
57492     57492     hubei          114.4800       30.5000          118       178     2012      10        12        286              0.235000      22.606659       0.000000       0.329063   -9999.000000   -9999.000000   -9999.000000       1.000000
57492     57492     hubei          114.4800       30.5000          118       178     2012      10        13        287              0.235000      22.097046       0.278110       0.328073   -9999.000000   -9999.000000       0.034600   -9999.000000
57492     57492     hubei          114.4800       30.5000          118       178     2012      10        14        288              0.235000      21.179504       2.051112       0.329595   -9999.000000   -9999.000000       0.178300       1.000000
57492     57492     hubei          114.4800       30.5000          118       178     2012      10        15        289              0.235625      21.944305      14.258721       0.331432       0.276000   -9999.000000       0.185900   -9999.000000
57492     57492     hubei          114.4800       30.5000          118       178     2012      10        16        290              0.248917      21.721954      17.056707       0.358428   -9999.000000   -9999.000000       0.250800       1.000000
57492     57492     hubei          114.4800       30.5000          118       178     2012      10        17        291              0.251000      18.959351       0.000000       0.386194   -9999.000000   -9999.000000   -9999.000000       0.613000
57492     57492     hubei          114.4800       30.5000          118       178     2012      10        18        292              0.250435      18.258331       0.000000       0.360706   -9999.000000   -9999.000000   -9999.000000   -9999.000000
57492     57492     hubei          114.4800       30.5000          118       178     2012      10        19        293              0.207500      19.871735       0.168737       0.352996   -9999.000000   -9999.000000       0.075900       0.758000
57492     57492     hubei          114.4800       30.5000          118       178     2012      10        20        294              0.175917      20.485748       2.554567       0.349809   -9999.000000   -9999.000000       0.224400   -9999.000000
57492     57492     hubei          114.4800       30.5000          118       178     2012      10        21        295              0.201250      22.850098      29.019457       0.351050   -9999.000000   -9999.000000       0.226200       0.638000
57492     57492     hubei          114.4800       30.5000          118       178     2012      10        22        296              0.252375      22.643036       3.052112       0.380863   -9999.000000   -9999.000000   -9999.000000   -9999.000000
57492     57492     hubei          114.4800       30.5000          118       178     2012      10        23        297              0.244250      16.672150       0.525323       0.375118   -9999.000000   -9999.000000   -9999.000000   -9999.000000
57492     57492     hubei          114.4800       30.5000          118       178     2012      10        24        298              0.239958      18.716949       2.002376       0.362196   -9999.000000   -9999.000000       0.165800       1.000000
57492     57492     hubei          114.4800       30.5000          118       178     2012      10        25        299              0.000000      16.947632       9.386104       0.363294   -9999.000000   -9999.000000       0.125500   -9999.000000
57492     57492     hubei          114.4800       30.5000          118       178     2012      10        26        300              0.260125      18.562958      16.526897       0.371999   -9999.000000   -9999.000000       0.163600       1.000000
57492     57492     hubei          114.4800       30.5000          118       178     2012      10        27        301              0.257208      18.163330       1.688707       0.388888   -9999.000000   -9999.000000       0.159800   -9999.000000
57492     57492     hubei          114.4800       30.5000          118       178     2012      10        28        302              0.000000      19.984436      12.047928       0.370551   -9999.000000   -9999.000000   -9999.000000       0.483000
57492     57492     hubei          114.4800       30.5000          118       178     2012      10        29        303              0.276958      20.613434      32.707760       0.370245   -9999.000000   -9999.000000   -9999.000000       1.000000
57492     57492     hubei          114.4800       30.5000          118       178     2012      10        30        304              0.262792      17.485901       0.000000       0.407012   -9999.000000   -9999.000000       0.021100   -9999.000000
57492     57492     hubei          114.4800       30.5000          118       178     2012      10        31        305              0.257870      17.333710       0.000000       0.376921   -9999.000000   -9999.000000       0.188400       1.000000
57492     57492     hubei          114.4800       30.5000          118       178     2012      11        01        306              0.255083      16.873657       0.000000       0.367776   -9999.000000   -9999.000000       0.170700   -9999.000000
57492     57492     hubei          114.4800       30.5000          118       178     2012      11        02        307              0.251917      16.461914       0.618120       0.363863   -9999.000000   -9999.000000       0.207100       0.421000
57492     57492     hubei          114.4800       30.5000          118       178     2012      11        03        308              0.256583      17.802490       5.185400       0.361437   -9999.000000   -9999.000000   -9999.000000   -9999.000000
57492     57492     hubei          114.4800       30.5000          118       178     2012      11        04        309              0.256391      13.471008       1.175341       0.370595   -9999.000000   -9999.000000   -9999.000000   -9999.000000
57492     57492     hubei          114.4800       30.5000          118       178     2012      11        05        310              0.253458      14.321991       0.000000       0.364384   -9999.000000   -9999.000000       0.098400       1.000000
57492     57492     hubei          114.4800       30.5000          118       178     2012      11        06        311              0.250875      13.308624       0.000000       0.359778   -9999.000000   -9999.000000       0.175100   -9999.000000
57492     57492     hubei          114.4800       30.5000          118       178     2012      11        07        312              0.249417      13.646301       0.787669       0.357678   -9999.000000   -9999.000000       0.186100       0.586000
57492     57492     hubei          114.4800       30.5000          118       178     2012      11        08        313              0.248417      14.777374       0.466423       0.357628   -9999.000000   -9999.000000   -9999.000000   -9999.000000
57492     57492     hubei          114.4800       30.5000          118       178     2012      11        09        314              0.249333      13.589935       2.192304       0.359553   -9999.000000   -9999.000000   -9999.000000   -9999.000000
57492     57492     hubei          114.4800       30.5000          118       178     2012      11        10        315              0.250625      12.760620       0.000000       0.363905   -9999.000000   -9999.000000       0.112300       0.656000
57492     57492     hubei          114.4800       30.5000          118       178     2012      11        11        316              0.248958      12.131927       2.293278       0.360978   -9999.000000   -9999.000000       0.151100   -9999.000000
57492     57492     hubei          114.4800       30.5000          118       178     2012      11        12        317              0.247042      12.244904       0.043610       0.357373   -9999.000000   -9999.000000       0.144600       0.155000
57492     57492     hubei          114.4800       30.5000          118       178     2012      11        13        318              0.000000      13.482452       0.562380       0.356190   -9999.000000   -9999.000000       0.177000   -9999.000000
57492     57492     hubei          114.4800       30.5000          118       178     2012      11        14        319              0.243750      15.358490       0.620861       0.356125   -9999.000000   -9999.000000   -9999.000000       0.405000
57492     57492     hubei          114.4800       30.5000          118       178     2012      11        15        320              0.241833      15.596375       1.846913       0.355704   -9999.000000   -9999.000000   -9999.000000       1.000000
57492     57492     hubei          114.4800       30.5000          118       178     2012      11        16        321              0.242208      12.100342       3.006835       0.359933   -9999.000000   -9999.000000       0.010000   -9999.000000
57492     57492     hubei          114.4800       30.5000          118       178     2012      11        17        322              0.000000      10.678833       0.581318       0.364971   -9999.000000   -9999.000000       0.164800       1.000000
57492     57492     hubei          114.4800       30.5000          118       178     2012      11        18        323              0.241167      12.435699       0.527933       0.359455   -9999.000000   -9999.000000       0.180200   -9999.000000
57492     57492     hubei          114.4800       30.5000          118       178     2012      11        19        324              0.239458      13.582977       0.321294       0.357048   -9999.000000   -9999.000000   -9999.000000       1.000000
57492     57492     hubei          114.4800       30.5000          118       178     2012      11        20        325              0.238792      14.178894       6.403787       0.355768   -9999.000000   -9999.000000   -9999.000000   -9999.000000
57492     57492     hubei          114.4800       30.5000          118       178     2012      11        21        326              0.242958      14.122070       0.159619       0.365764   -9999.000000   -9999.000000       0.155600   -9999.000000
57492     57492     hubei          114.4800       30.5000          118       178     2012      11        22        327              0.256083      12.486053      16.297779       0.364049   -9999.000000   -9999.000000       0.116900       1.000000
57492     57492     hubei          114.4800       30.5000          118       178     2012      11        23        328              0.260083      11.894714       1.571096       0.385721   -9999.000000   -9999.000000       0.150400   -9999.000000
57492     57492     hubei          114.4800       30.5000          118       178     2012      11        24        329              0.258708      10.006012       2.556967       0.372949   -9999.000000   -9999.000000       0.166800       1.000000
57492     57492     hubei          114.4800       30.5000          118       178     2012      11        25        330              0.261875      11.184784       1.488787       0.369787   -9999.000000   -9999.000000   -9999.000000   -9999.000000
57492     57492     hubei          114.4800       30.5000          118       178     2012      11        26        331              0.257667       9.195251       0.364885       0.370556   -9999.000000   -9999.000000   -9999.000000       1.000000
57492     57492     hubei          114.4800       30.5000          118       178     2012      11        27        332              0.255417       9.951569       0.719424       0.363923   -9999.000000   -9999.000000       0.039600       1.000000
57492     57492     hubei          114.4800       30.5000          118       178     2012      11        28        333              0.254917      10.890778       0.000000       0.363126   -9999.000000   -9999.000000       0.156500   -9999.000000
57492     57492     hubei          114.4800       30.5000          118       178     2012      11        29        334              0.254000      11.325958       1.716392       0.361459   -9999.000000   -9999.000000       0.156400       1.000000
57492     57492     hubei          114.4800       30.5000          118       178     2012      11        30        335              0.253417      11.781006       0.187488       0.363300   -9999.000000   -9999.000000       0.177800   -9999.000000
57492     57492     hubei          114.4800       30.5000          118       178     2012      12        01        336              0.257500      11.728516       4.858440       0.362077   -9999.000000   -9999.000000   -9999.000000       1.000000
57492     57492     hubei          114.4800       30.5000          118       178     2012      12        02        337              0.257292       8.450928       1.833276       0.370189   -9999.000000   -9999.000000   -9999.000000   -9999.000000
57492     57492     hubei          114.4800       30.5000          118       178     2012      12        03        338              0.255083       7.103424       0.000000       0.365130   -9999.000000   -9999.000000       0.027500   -9999.000000
57492     57492     hubei          114.4800       30.5000          118       178     2012      12        04        339              0.253375       9.262054       0.000000       0.362028   -9999.000000   -9999.000000       0.148500       1.000000
57492     57492     hubei          114.4800       30.5000          118       178     2012      12        05        340              0.251750       8.382965       0.000000       0.361301   -9999.000000   -9999.000000       0.153600   -9999.000000
57492     57492     hubei          114.4800       30.5000          118       178     2012      12        06        341              0.250042       9.826782       0.000000       0.359335   -9999.000000   -9999.000000   -9999.000000       0.635000
57492     57492     hubei          114.4800       30.5000          118       178     2012      12        07        342              0.248667       9.743134       0.449638       0.358620   -9999.000000   -9999.000000   -9999.000000   -9999.000000
57492     57492     hubei          114.4800       30.5000          118       178     2012      12        08        343              0.247083      10.415009       0.000000       0.357964   -9999.000000   -9999.000000       0.144800   -9999.000000
57492     57492     hubei          114.4800       30.5000          118       178     2012      12        09        344              0.245625       9.622528       0.424905       0.356408   -9999.000000   -9999.000000       0.146400       0.699000
57492     57492     hubei          114.4800       30.5000          118       178     2012      12        10        345              0.244583       8.295624       1.234203       0.356646   -9999.000000   -9999.000000       0.138300   -9999.000000
57492     57492     hubei          114.4800       30.5000          118       178     2012      12        11        346              0.243792       6.647980       0.000000       0.357225   -9999.000000   -9999.000000       0.139300       1.000000
57492     57492     hubei          114.4800       30.5000          118       178     2012      12        12        347              0.242750       7.813782       0.282297       0.356166   -9999.000000   -9999.000000   -9999.000000   -9999.000000
57492     57492     hubei          114.4800       30.5000          118       178     2012      12        13        348              0.263708       8.948395      15.464184       0.356071   -9999.000000   -9999.000000   -9999.000000       0.903000
57492     57492     hubei          114.4800       30.5000          118       178     2012      12        14        349              0.270000       8.431183      10.267681       0.383411   -9999.000000   -9999.000000       0.014600       1.000000
57492     57492     hubei          114.4800       30.5000          118       178     2012      12        15        350              0.000000       5.808929       0.676894       0.383893   -9999.000000   -9999.000000       0.175500   -9999.000000
57492     57492     hubei          114.4800       30.5000          118       178     2012      12        16        351              0.262875       6.717194       0.000000       0.373840   -9999.000000   -9999.000000       0.150000       1.000000
57492     57492     hubei          114.4800       30.5000          118       178     2012      12        17        352              0.285208       6.917328      17.135622       0.368670   -9999.000000   -9999.000000       0.165600   -9999.000000
57492     57492     hubei          114.4800       30.5000          118       178     2012      12        18        353              0.274458       5.918396       0.517455       0.388262   -9999.000000   -9999.000000   -9999.000000       1.000000
57492     57492     hubei          114.4800       30.5000          118       178     2012      12        19        354              0.267542       5.582825       0.487412       0.376139   -9999.000000   -9999.000000   -9999.000000   -9999.000000
57492     57492     hubei          114.4800       30.5000          118       178     2012      12        20        355              0.000000       5.814697       3.978920       0.370216   -9999.000000   -9999.000000       0.080500   -9999.000000
57492     57492     hubei          114.4800       30.5000          118       178     2012      12        21        356              0.267250       3.089905       0.960765       0.375555   -9999.000000   -9999.000000       0.155500       1.000000
57492     57492     hubei          114.4800       30.5000          118       178     2012      12        22        357              0.263792       3.668457       0.000000       0.370723   -9999.000000   -9999.000000       0.153000   -9999.000000
57492     57492     hubei          114.4800       30.5000          118       178     2012      12        23        358              0.260667       3.156158       1.765685       0.365284   -9999.000000   -9999.000000   -9999.000000       1.000000
57492     57492     hubei          114.4800       30.5000          118       178     2012      12        24        359              0.258765       3.188568       2.429057       0.358264   -9999.000000   -9999.000000   -9999.000000   -9999.000000
57492     57492     hubei          114.4800       30.5000          118       178     2012      12        25        360              0.257333       5.286652       1.359266       0.364424   -9999.000000   -9999.000000       0.104700       1.000000
57492     57492     hubei          114.4800       30.5000          118       178     2012      12        26        361              0.000000       3.689941       1.428222       0.365026   -9999.000000   -9999.000000       0.123000       0.623000
57492     57492     hubei          114.4800       30.5000          118       178     2012      12        27        362              0.262667       1.990875       3.177901       0.361968   -9999.000000   -9999.000000       0.143800   -9999.000000
57492     57492     hubei          114.4800       30.5000          118       178     2012      12        28        363              0.261000       1.839447       9.532727       0.365253   -9999.000000   -9999.000000       0.151800       1.000000
57492     57492     hubei          114.4800       30.5000          118       178     2012      12        29        364              0.000000       3.012787       5.639608       0.369870   -9999.000000   -9999.000000   -9999.000000   -9999.000000
57492     57492     hubei          114.4800       30.5000          118       178     2012      12        30        365              0.000000       1.847839       0.525012       0.376720   -9999.000000   -9999.000000   -9999.000000       0.340000
57492     57492     hubei          114.4800       30.5000          118       178     2012      12        31        366              0.266267       2.657959       0.000000       0.357247   -9999.000000   -9999.000000       0.010000   -9999.000000
