# Supplementary material for: Research on Fusing Multisatellite Soil Moisture Data Based on Bayesian Model Averaging
Source: Hindawi journal article supplement (doi:10.1155/2018/9310838), 2018-06-25
Supplement: f1 [file 9310838.f1.zip › 2012_sm00-10cm_daily_ZDB_ZHY_57494_366days_allin.txt]

57494     57494     hubei          114.0506       30.5978          118       176     2012      01        01        001              0.000000   -9999.000000       0.000000   -9999.000000   -9999.000000   -9999.000000       0.142400   -9999.000000
57494     57494     hubei          114.0506       30.5978          118       176     2012      01        02        002              0.301000       4.461792       0.000000       0.333534   -9999.000000       0.145200       0.183300   -9999.000000
57494     57494     hubei          114.0506       30.5978          118       176     2012      01        03        003              0.000000       4.621124       0.000000       0.338988   -9999.000000       0.064100   -9999.000000       0.016000
57494     57494     hubei          114.0506       30.5978          118       176     2012      01        04        004              0.300250       2.451385       0.692772       0.317064   -9999.000000   -9999.000000   -9999.000000   -9999.000000
57494     57494     hubei          114.0506       30.5978          118       176     2012      01        05        005              0.300000       3.283661       0.000000       0.322744   -9999.000000       0.131900       0.092500       0.072000
57494     57494     hubei          114.0506       30.5978          118       176     2012      01        06        006              0.299792       2.521545       0.000000       0.321976   -9999.000000   -9999.000000       0.150400   -9999.000000
57494     57494     hubei          114.0506       30.5978          118       176     2012      01        07        007              0.299917       4.526733       0.000000       0.327014   -9999.000000   -9999.000000       0.180400   -9999.000000
57494     57494     hubei          114.0506       30.5978          118       176     2012      01        08        008              0.000000       2.252899       0.000000       0.327641   -9999.000000       0.027600   -9999.000000       0.093000
57494     57494     hubei          114.0506       30.5978          118       176     2012      01        09        009              0.300000       3.158783       0.000000       0.332524   -9999.000000   -9999.000000   -9999.000000   -9999.000000
57494     57494     hubei          114.0506       30.5978          118       176     2012      01        10        010              0.300000       5.000671       0.000000       0.333994   -9999.000000       0.170300       0.111900       0.118000
57494     57494     hubei          114.0506       30.5978          118       176     2012      01        11        011              0.299333       5.193268       0.000000       0.333445   -9999.000000   -9999.000000       0.099700   -9999.000000
57494     57494     hubei          114.0506       30.5978          118       176     2012      01        12        012              0.299208       3.575562       0.239804       0.333015   -9999.000000       0.268500       0.118600       0.459000
57494     57494     hubei          114.0506       30.5978          118       176     2012      01        13        013              0.301417       3.619843       8.281594       0.333833   -9999.000000       0.086300       0.124800       0.159000
57494     57494     hubei          114.0506       30.5978          118       176     2012      01        14        014              0.307625       3.528046       1.453482       0.345286   -9999.000000   -9999.000000   -9999.000000   -9999.000000
57494     57494     hubei          114.0506       30.5978          118       176     2012      01        15        015              0.308375       3.085175       0.029526       0.350796   -9999.000000   -9999.000000   -9999.000000       0.734000
57494     57494     hubei          114.0506       30.5978          118       176     2012      01        16        016              0.311042       3.161377       0.000000       0.343936   -9999.000000       0.094100       0.080700   -9999.000000
57494     57494     hubei          114.0506       30.5978          118       176     2012      01        17        017              0.000000       4.740875       1.226619       0.341097   -9999.000000   -9999.000000       0.109500       0.769000
57494     57494     hubei          114.0506       30.5978          118       176     2012      01        18        018              0.313167       4.738861       1.725903       0.342590   -9999.000000   -9999.000000       0.119500   -9999.000000
57494     57494     hubei          114.0506       30.5978          118       176     2012      01        19        019              0.312000       4.949097       0.715446       0.344821   -9999.000000   -9999.000000       0.129500   -9999.000000
57494     57494     hubei          114.0506       30.5978          118       176     2012      01        20        020              0.316417       4.940674       6.802972       0.341623   -9999.000000       0.330200   -9999.000000       0.976000
57494     57494     hubei          114.0506       30.5978          118       176     2012      01        21        021              0.316667       4.095978       0.332089       0.355392   -9999.000000       0.073100   -9999.000000   -9999.000000
57494     57494     hubei          114.0506       30.5978          118       176     2012      01        22        022              0.314917       1.683868       1.818261       0.318732   -9999.000000   -9999.000000       0.042200       0.367000
57494     57494     hubei          114.0506       30.5978          118       176     2012      01        23        023              0.314958       0.944366       0.429777       0.288428   -9999.000000       0.157300       0.135700   -9999.000000
57494     57494     hubei          114.0506       30.5978          118       176     2012      01        24        024              0.313625       1.610168       0.261274       0.303636   -9999.000000   -9999.000000   -9999.000000   -9999.000000
57494     57494     hubei          114.0506       30.5978          118       176     2012      01        25        025              0.312000       2.904846       0.000000       0.312210   -9999.000000       0.079900   -9999.000000       0.306000
57494     57494     hubei          114.0506       30.5978          118       176     2012      01        26        026              0.312167       3.447662       0.000000       0.316835   -9999.000000       0.061000   -9999.000000   -9999.000000
57494     57494     hubei          114.0506       30.5978          118       176     2012      01        27        027              0.312167       5.002350       0.000000       0.333050   -9999.000000   -9999.000000       0.144400       0.184000
57494     57494     hubei          114.0506       30.5978          118       176     2012      01        28        028              0.312000       3.582703       0.000000       0.336403   -9999.000000       0.032400       0.121000   -9999.000000
57494     57494     hubei          114.0506       30.5978          118       176     2012      01        29        029              0.312417       5.326752       0.753116       0.335822   -9999.000000   -9999.000000       0.144300       0.303000
57494     57494     hubei          114.0506       30.5978          118       176     2012      01        30        030              0.312750       4.699005       0.000000       0.337880   -9999.000000       0.233600       0.129900       0.813000
57494     57494     hubei          114.0506       30.5978          118       176     2012      01        31        031              0.312417       4.467926       0.000000       0.336419   -9999.000000       0.100100   -9999.000000   -9999.000000
57494     57494     hubei          114.0506       30.5978          118       176     2012      02        01        032              0.311542       6.411194       0.000000       0.335497   -9999.000000   -9999.000000   -9999.000000       0.157000
57494     57494     hubei          114.0506       30.5978          118       176     2012      02        02        033              0.310750       4.911224       0.000000       0.333999   -9999.000000       0.088100       0.048300   -9999.000000
57494     57494     hubei          114.0506       30.5978          118       176     2012      02        03        034              0.310167       3.148682       0.000000       0.322591   -9999.000000       0.056900       0.118700       0.090000
57494     57494     hubei          114.0506       30.5978          118       176     2012      02        04        035              0.309958       5.438171       0.000000       0.330283   -9999.000000   -9999.000000       0.118400   -9999.000000
57494     57494     hubei          114.0506       30.5978          118       176     2012      02        05        036              0.315333       3.802979       7.918951       0.333052   -9999.000000       0.090600       0.148700   -9999.000000
57494     57494     hubei          114.0506       30.5978          118       176     2012      02        06        037              0.317667       4.405884       0.146183       0.349981   -9999.000000   -9999.000000   -9999.000000       0.399000
57494     57494     hubei          114.0506       30.5978          118       176     2012      02        07        038              0.315167       5.293427       0.000000       0.345019   -9999.000000       0.108600   -9999.000000   -9999.000000
57494     57494     hubei          114.0506       30.5978          118       176     2012      02        08        039              0.313625       4.480469       0.000000       0.333082   -9999.000000       0.251100       0.071500       0.060000
57494     57494     hubei          114.0506       30.5978          118       176     2012      02        09        040              0.313000       4.756622       0.000000       0.333656   -9999.000000   -9999.000000       0.112900   -9999.000000
57494     57494     hubei          114.0506       30.5978          118       176     2012      02        10        041              0.312375       2.561035       0.000000       0.326727   -9999.000000       0.189300       0.117200       0.235000
57494     57494     hubei          114.0506       30.5978          118       176     2012      02        11        042              0.311417       4.948303       0.000000       0.330914   -9999.000000   -9999.000000   -9999.000000       0.141000
57494     57494     hubei          114.0506       30.5978          118       176     2012      02        12        043              0.311292       6.961334       0.990469       0.332702   -9999.000000       0.060100   -9999.000000   -9999.000000
57494     57494     hubei          114.0506       30.5978          118       176     2012      02        13        044              0.313000       5.568817       0.869938       0.335124   -9999.000000       0.134700   -9999.000000       0.278000
57494     57494     hubei          114.0506       30.5978          118       176     2012      02        14        045              0.316542       4.803864       4.963248       0.336227   -9999.000000   -9999.000000       0.135200   -9999.000000
57494     57494     hubei          114.0506       30.5978          118       176     2012      02        15        046              0.318458       4.242981       1.544839       0.345974   -9999.000000   -9999.000000       0.130800       0.709000
57494     57494     hubei          114.0506       30.5978          118       176     2012      02        16        047              0.317458       4.213715       0.000000       0.345510   -9999.000000   -9999.000000       0.131700   -9999.000000
57494     57494     hubei          114.0506       30.5978          118       176     2012      02        17        048              0.316000       6.207062       0.263374       0.340850   -9999.000000   -9999.000000   -9999.000000   -9999.000000
57494     57494     hubei          114.0506       30.5978          118       176     2012      02        18        049              0.314958       6.844360       0.000000       0.337303   -9999.000000       0.047300   -9999.000000       0.447000
57494     57494     hubei          114.0506       30.5978          118       176     2012      02        19        050              0.313875       7.052521       0.161296       0.334501   -9999.000000   -9999.000000       0.065000   -9999.000000
57494     57494     hubei          114.0506       30.5978          118       176     2012      02        20        051              0.313565       8.365204       0.621876       0.332481   -9999.000000       0.232500       0.106900       0.189000
57494     57494     hubei          114.0506       30.5978          118       176     2012      02        21        052              0.315083       6.884521       5.569933       0.333552   -9999.000000   -9999.000000   -9999.000000   -9999.000000
57494     57494     hubei          114.0506       30.5978          118       176     2012      02        22        053              0.319500       7.980225      15.846390       0.344114   -9999.000000   -9999.000000       0.131700   -9999.000000
57494     57494     hubei          114.0506       30.5978          118       176     2012      02        23        054              0.317750       8.490784       0.256935       0.370313   -9999.000000       0.146600   -9999.000000       0.741000
57494     57494     hubei          114.0506       30.5978          118       176     2012      02        24        055              0.316833       7.524475       0.000000       0.351723   -9999.000000   -9999.000000   -9999.000000   -9999.000000
57494     57494     hubei          114.0506       30.5978          118       176     2012      02        25        056              0.316000       5.059265       0.486407       0.346376   -9999.000000       0.284700       0.082100       0.660000
57494     57494     hubei          114.0506       30.5978          118       176     2012      02        26        057              0.315750       4.621063       0.000000       0.343964   -9999.000000       0.329800       0.115000   -9999.000000
57494     57494     hubei          114.0506       30.5978          118       176     2012      02        27        058              0.315000       6.371857       0.000000       0.340307   -9999.000000   -9999.000000   -9999.000000       0.225000
57494     57494     hubei          114.0506       30.5978          118       176     2012      02        28        059              0.314500       6.085632       0.609508       0.338727   -9999.000000       0.035100   -9999.000000       0.615000
57494     57494     hubei          114.0506       30.5978          118       176     2012      02        29        060              0.000000   -9999.000000       0.000000   -9999.000000   -9999.000000   -9999.000000   -9999.000000   -9999.000000
57494     57494     hubei          114.0506       30.5978          118       176     2012      03        01        061              0.314000       8.521942       0.243011       0.336065   -9999.000000   -9999.000000       0.081400       0.194000
57494     57494     hubei          114.0506       30.5978          118       176     2012      03        02        062              0.315042       7.765015       9.359798       0.336279   -9999.000000       0.105700       0.106400   -9999.000000
57494     57494     hubei          114.0506       30.5978          118       176     2012      03        03        063              0.319333       7.675659       7.869874       0.345149   -9999.000000   -9999.000000       0.123600       0.542000
57494     57494     hubei          114.0506       30.5978          118       176     2012      03        04        064              0.319792       6.548462       1.927941       0.360341   -9999.000000       0.104100       0.138200   -9999.000000
57494     57494     hubei          114.0506       30.5978          118       176     2012      03        05        065              0.318167       4.829041       0.000000       0.356864   -9999.000000   -9999.000000   -9999.000000   -9999.000000
57494     57494     hubei          114.0506       30.5978          118       176     2012      03        06        066              0.318000       7.153595       2.913029       0.347818   -9999.000000   -9999.000000   -9999.000000       0.446000
57494     57494     hubei          114.0506       30.5978          118       176     2012      03        07        067              0.000000       7.777222       8.513141       0.348688   -9999.000000       0.249800       0.109300   -9999.000000
57494     57494     hubei          114.0506       30.5978          118       176     2012      03        08        068              0.319750       7.022125       4.866974       0.361416   -9999.000000   -9999.000000       0.165200       0.892000
57494     57494     hubei          114.0506       30.5978          118       176     2012      03        09        069              0.317708       6.226196       0.069314       0.361589   -9999.000000       0.176200       0.175400   -9999.000000
57494     57494     hubei          114.0506       30.5978          118       176     2012      03        10        070              0.316708       7.171082       0.000000       0.350626   -9999.000000   -9999.000000       0.167800       0.593000
57494     57494     hubei          114.0506       30.5978          118       176     2012      03        11        071              0.315708      10.024231       0.539111       0.345109   -9999.000000       0.074900   -9999.000000       0.432000
57494     57494     hubei          114.0506       30.5978          118       176     2012      03        12        072              0.315292       8.826416       0.000000       0.342993   -9999.000000       0.075000   -9999.000000   -9999.000000
57494     57494     hubei          114.0506       30.5978          118       176     2012      03        13        073              0.314652      10.645264       3.062003       0.340310   -9999.000000   -9999.000000       0.096800       0.254000
57494     57494     hubei          114.0506       30.5978          118       176     2012      03        14        074              0.314292      13.360565       4.115145       0.337569   -9999.000000   -9999.000000       0.142800   -9999.000000
57494     57494     hubei          114.0506       30.5978          118       176     2012      03        15        075              0.319958      15.155182       2.871837       0.339457       0.204000       0.099800       0.167100       0.662000
57494     57494     hubei          114.0506       30.5978          118       176     2012      03        16        076              0.318304      11.808929       0.165333       0.352302   -9999.000000   -9999.000000   -9999.000000   -9999.000000
57494     57494     hubei          114.0506       30.5978          118       176     2012      03        17        077              0.317667      10.783203       0.846632       0.344747   -9999.000000       0.209300   -9999.000000   -9999.000000
57494     57494     hubei          114.0506       30.5978          118       176     2012      03        18        078              0.317250      11.442047       0.401259       0.345094   -9999.000000   -9999.000000       0.132100       0.675000
57494     57494     hubei          114.0506       30.5978          118       176     2012      03        19        079              0.317583      15.407928       1.169860       0.340682   -9999.000000       0.165000       0.218500   -9999.000000
57494     57494     hubei          114.0506       30.5978          118       176     2012      03        20        080              0.317696       8.160553       0.811517       0.342837   -9999.000000       0.238000       0.221100       0.593000
57494     57494     hubei          114.0506       30.5978          118       176     2012      03        21        081              0.317875       8.379059      10.726039       0.343636       0.346000   -9999.000000       0.243300   -9999.000000
57494     57494     hubei          114.0506       30.5978          118       176     2012      03        22        082              0.321000      10.897644      43.840996       0.352706   -9999.000000       0.201200   -9999.000000   -9999.000000
57494     57494     hubei          114.0506       30.5978          118       176     2012      03        23        083              0.319417       7.634460       0.679097       0.396856   -9999.000000   -9999.000000   -9999.000000       0.634000
57494     57494     hubei          114.0506       30.5978          118       176     2012      03        24        084              0.317167      12.341766       0.000000       0.366510   -9999.000000   -9999.000000   -9999.000000   -9999.000000
57494     57494     hubei          114.0506       30.5978          118       176     2012      03        25        085              0.000000      14.905304       0.000000       0.353482   -9999.000000       0.276800       0.203700       0.419000
57494     57494     hubei          114.0506       30.5978          118       176     2012      03        26        086              0.314583      17.066559       0.000000       0.347536   -9999.000000   -9999.000000       0.273800   -9999.000000
57494     57494     hubei          114.0506       30.5978          118       176     2012      03        27        087              0.313458      18.942017       0.422139       0.343213       0.163000       0.230500       0.257000       0.148000
57494     57494     hubei          114.0506       30.5978          118       176     2012      03        28        088              0.312292      20.328766       1.028928       0.340888   -9999.000000   -9999.000000   -9999.000000       0.592000
57494     57494     hubei          114.0506       30.5978          118       176     2012      03        29        089              0.315208      20.482727      14.544348       0.339094   -9999.000000   -9999.000000       0.281500   -9999.000000
57494     57494     hubei          114.0506       30.5978          118       176     2012      03        30        090              0.321917      18.052673       2.770870       0.357765   -9999.000000       0.217700       0.218600       0.408000
57494     57494     hubei          114.0506       30.5978          118       176     2012      03        31        091              0.319125      15.802765       0.000000       0.364007   -9999.000000   -9999.000000       0.254200   -9999.000000
57494     57494     hubei          114.0506       30.5978          118       176     2012      04        01        092              0.315917      17.742371       0.000000       0.348298   -9999.000000       0.138900       0.249500       0.130000
57494     57494     hubei          114.0506       30.5978          118       176     2012      04        02        093              0.313375      19.719757       0.000000       0.342515       0.213000       0.152000   -9999.000000   -9999.000000
57494     57494     hubei          114.0506       30.5978          118       176     2012      04        03        094              0.310917      19.623810       0.532723       0.338167   -9999.000000   -9999.000000   -9999.000000   -9999.000000
57494     57494     hubei          114.0506       30.5978          118       176     2012      04        04        095              0.319708      17.177856      11.196344       0.337760   -9999.000000       0.100100       0.201700       0.383000
57494     57494     hubei          114.0506       30.5978          118       176     2012      04        05        096              0.319542      14.047180       0.725852       0.363661   -9999.000000   -9999.000000       0.220200   -9999.000000
57494     57494     hubei          114.0506       30.5978          118       176     2012      04        06        097              0.317542      17.316315       0.132190       0.349682       0.163000   -9999.000000       0.219800       0.362000
57494     57494     hubei          114.0506       30.5978          118       176     2012      04        07        098              0.314792      20.442688       0.288289       0.343493       0.184000       0.101000       0.239300   -9999.000000
57494     57494     hubei          114.0506       30.5978          118       176     2012      04        08        099              0.312875      21.671906       0.681527       0.339248   -9999.000000   -9999.000000   -9999.000000       0.230000
57494     57494     hubei          114.0506       30.5978          118       176     2012      04        09        100              0.317833      20.154938       4.794564       0.338225   -9999.000000       0.081500   -9999.000000       0.744000
57494     57494     hubei          114.0506       30.5978          118       176     2012      04        10        101              0.320333      18.249634      13.278811       0.351975   -9999.000000   -9999.000000       0.106100   -9999.000000
57494     57494     hubei          114.0506       30.5978          118       176     2012      04        11        102              0.319833      19.563080       0.827014       0.367335   -9999.000000   -9999.000000       0.170300       0.546000
57494     57494     hubei          114.0506       30.5978          118       176     2012      04        12        103              0.321500      21.034149      11.693551       0.353755       0.265000   -9999.000000       0.215500   -9999.000000
57494     57494     hubei          114.0506       30.5978          118       176     2012      04        13        104              0.319333      15.743225       0.084598       0.368503   -9999.000000   -9999.000000   -9999.000000       0.616000
57494     57494     hubei          114.0506       30.5978          118       176     2012      04        14        105              0.318417      17.313477       0.325646       0.353533   -9999.000000       0.078600   -9999.000000   -9999.000000
57494     57494     hubei          114.0506       30.5978          118       176     2012      04        15        106              0.317208      15.664551       0.509131       0.350790   -9999.000000   -9999.000000       0.175300   -9999.000000
57494     57494     hubei          114.0506       30.5978          118       176     2012      04        16        107              0.315667      17.317261       0.448103       0.347534       0.178000       0.215000       0.218400       0.349000
57494     57494     hubei          114.0506       30.5978          118       176     2012      04        17        108              0.314500      20.859406       0.000000       0.344493   -9999.000000       0.107500       0.245800   -9999.000000
57494     57494     hubei          114.0506       30.5978          118       176     2012      04        18        109              0.313542      20.646881       0.000000       0.343749       0.234000   -9999.000000   -9999.000000       0.461000
57494     57494     hubei          114.0506       30.5978          118       176     2012      04        19        110              0.311708      21.039764       0.000000       0.341624   -9999.000000       0.134400   -9999.000000   -9999.000000
57494     57494     hubei          114.0506       30.5978          118       176     2012      04        20        111              0.316750      23.617310       0.176005       0.336887   -9999.000000       0.041600   -9999.000000   -9999.000000
57494     57494     hubei          114.0506       30.5978          118       176     2012      04        21        112              0.316250      18.435333       0.318408       0.339639       0.175000   -9999.000000       0.170200       0.415000
57494     57494     hubei          114.0506       30.5978          118       176     2012      04        22        113              0.312083      21.463104       4.608830       0.336651       0.169000   -9999.000000       0.241100   -9999.000000
57494     57494     hubei          114.0506       30.5978          118       176     2012      04        23        114              0.312250      24.512421      12.098244       0.339694       0.229000   -9999.000000       0.301700       0.868000
57494     57494     hubei          114.0506       30.5978          118       176     2012      04        24        115              0.321375      24.766266      12.489112       0.359099   -9999.000000   -9999.000000       0.368600   -9999.000000
57494     57494     hubei          114.0506       30.5978          118       176     2012      04        25        116              0.000000      21.274780       1.170654       0.369981   -9999.000000   -9999.000000   -9999.000000       0.515000
57494     57494     hubei          114.0506       30.5978          118       176     2012      04        26        117              0.314667      20.363281       0.751416       0.353806   -9999.000000   -9999.000000   -9999.000000       0.676000
57494     57494     hubei          114.0506       30.5978          118       176     2012      04        27        118              0.309792      22.518951       0.438623       0.344051       0.176000       0.156300   -9999.000000   -9999.000000
57494     57494     hubei          114.0506       30.5978          118       176     2012      04        28        119              0.315542      24.509491      11.958742       0.338732       0.221000   -9999.000000       0.303600       0.679000
57494     57494     hubei          114.0506       30.5978          118       176     2012      04        29        120              0.319417      24.701752       0.917773       0.358104   -9999.000000       0.163500       0.322100   -9999.000000
57494     57494     hubei          114.0506       30.5978          118       176     2012      04        30        121              0.322167      24.026855      24.392477       0.350686   -9999.000000       0.188800   -9999.000000       0.912000
57494     57494     hubei          114.0506       30.5978          118       176     2012      05        01        122              0.320750      22.430725       0.387753       0.380131       0.242000   -9999.000000   -9999.000000   -9999.000000
57494     57494     hubei          114.0506       30.5978          118       176     2012      05        02        123              0.320167      22.190735       7.059589       0.358377       0.212000       0.185500       0.238900   -9999.000000
57494     57494     hubei          114.0506       30.5978          118       176     2012      05        03        124              0.322250      22.867523       1.212501       0.358608   -9999.000000   -9999.000000       0.225600       0.660000
57494     57494     hubei          114.0506       30.5978          118       176     2012      05        04        125              0.320417      22.149506       1.963013       0.360314   -9999.000000       0.224400       0.221100   -9999.000000
57494     57494     hubei          114.0506       30.5978          118       176     2012      05        05        126              0.317542      24.141663       0.000000       0.352204   -9999.000000   -9999.000000       0.231500       0.608000
57494     57494     hubei          114.0506       30.5978          118       176     2012      05        06        127              0.313208      26.832336       0.000000       0.345700   -9999.000000   -9999.000000   -9999.000000   -9999.000000
57494     57494     hubei          114.0506       30.5978          118       176     2012      05        07        128              0.318042      28.364410      27.714523       0.341899   -9999.000000       0.123200   -9999.000000       1.000000
57494     57494     hubei          114.0506       30.5978          118       176     2012      05        08        129              0.321583      27.676025       0.963676       0.378314       0.234000   -9999.000000       0.209600       0.724000
57494     57494     hubei          114.0506       30.5978          118       176     2012      05        09        130              0.322458      27.481964       2.793287       0.361159       0.368000   -9999.000000       0.311900   -9999.000000
57494     57494     hubei          114.0506       30.5978          118       176     2012      05        10        131              0.318833      23.518402       0.000000       0.359860   -9999.000000       0.464200       0.285000       0.471000
57494     57494     hubei          114.0506       30.5978          118       176     2012      05        11        132              0.313125      27.375793       0.377944       0.349191       0.264000   -9999.000000       0.302500   -9999.000000
57494     57494     hubei          114.0506       30.5978          118       176     2012      05        12        133              0.317458      28.577972       6.488635       0.344988       0.238000       0.222200   -9999.000000       0.844000
57494     57494     hubei          114.0506       30.5978          118       176     2012      05        13        134              0.321333      22.892456      15.365353       0.357410       0.287500       0.240900   -9999.000000   -9999.000000
57494     57494     hubei          114.0506       30.5978          118       176     2012      05        14        135              0.323417      24.491394       8.682996       0.364034   -9999.000000   -9999.000000       0.189300   -9999.000000
57494     57494     hubei          114.0506       30.5978          118       176     2012      05        15        136              0.321167      20.534882       0.000000       0.374477   -9999.000000       0.347200       0.291000       0.694000
57494     57494     hubei          114.0506       30.5978          118       176     2012      05        16        137              0.317375      21.883209       0.051588       0.358559   -9999.000000   -9999.000000       0.287500   -9999.000000
57494     57494     hubei          114.0506       30.5978          118       176     2012      05        17        138              0.311958      25.031677       0.173816       0.350863       0.183000       0.297300   -9999.000000       0.542000
57494     57494     hubei          114.0506       30.5978          118       176     2012      05        18        139              0.313625      27.409332      24.351364       0.346083       0.190000       0.282400   -9999.000000   -9999.000000
57494     57494     hubei          114.0506       30.5978          118       176     2012      05        19        140              0.321917      24.608063       0.730061       0.364949   -9999.000000   -9999.000000       0.286900   -9999.000000
57494     57494     hubei          114.0506       30.5978          118       176     2012      05        20        141              0.318125      25.093658       0.000000       0.366121   -9999.000000   -9999.000000       0.244500       0.578000
57494     57494     hubei          114.0506       30.5978          118       176     2012      05        21        142              0.313375      24.964569       0.000000       0.353446   -9999.000000   -9999.000000       0.239700   -9999.000000
57494     57494     hubei          114.0506       30.5978          118       176     2012      05        22        143              0.316125      25.528168       9.431847       0.349191       0.259000   -9999.000000       0.235300       0.832000
57494     57494     hubei          114.0506       30.5978          118       176     2012      05        23        144              0.323708      23.858124      10.444461       0.361405   -9999.000000       0.346300   -9999.000000   -9999.000000
57494     57494     hubei          114.0506       30.5978          118       176     2012      05        24        145              0.324250      22.991821       3.191062       0.369476       0.371000   -9999.000000   -9999.000000       0.733000
57494     57494     hubei          114.0506       30.5978          118       176     2012      05        25        146              0.000000      22.579926       0.889674       0.365344       0.400000   -9999.000000       0.273500       0.874000
57494     57494     hubei          114.0506       30.5978          118       176     2012      05        26        147              0.320167      23.617004       0.000000       0.357596   -9999.000000   -9999.000000       0.256500   -9999.000000
57494     57494     hubei          114.0506       30.5978          118       176     2012      05        27        148              0.315792      25.611145       0.000000       0.351493   -9999.000000       0.194300       0.262700       0.375000
57494     57494     hubei          114.0506       30.5978          118       176     2012      05        28        149              0.313333      27.260986      21.299435       0.348009       0.245000       0.216100       0.248600   -9999.000000
57494     57494     hubei          114.0506       30.5978          118       176     2012      05        29        150              0.325333      28.500519      56.036873       0.358196   -9999.000000   -9999.000000   -9999.000000       0.936000
57494     57494     hubei          114.0506       30.5978          118       176     2012      05        30        151              0.321542      22.368134       1.109532       0.410203   -9999.000000       0.225800   -9999.000000   -9999.000000
57494     57494     hubei          114.0506       30.5978          118       176     2012      05        31        152              0.317083      25.774292       0.383255       0.382452   -9999.000000   -9999.000000   -9999.000000   -9999.000000
57494     57494     hubei          114.0506       30.5978          118       176     2012      06        01        153              0.321042      26.318604       3.391864       0.372446   -9999.000000   -9999.000000       0.294500       0.456000
57494     57494     hubei          114.0506       30.5978          118       176     2012      06        02        154              0.320375      23.386597       1.568348       0.373040   -9999.000000       0.352000       0.283200   -9999.000000
57494     57494     hubei          114.0506       30.5978          118       176     2012      06        03        155              0.318083      26.201935       1.848288       0.364553       0.481000   -9999.000000   -9999.000000       0.564000
57494     57494     hubei          114.0506       30.5978          118       176     2012      06        04        156              0.318125      25.655273       0.517364       0.362391       0.477000   -9999.000000   -9999.000000   -9999.000000
57494     57494     hubei          114.0506       30.5978          118       176     2012      06        05        157              0.316167      25.761230       5.767135       0.360042   -9999.000000       0.294300       0.317700       0.505000
57494     57494     hubei          114.0506       30.5978          118       176     2012      06        06        158              0.324583      27.484741       3.310887       0.360945   -9999.000000   -9999.000000       0.287400       0.978000
57494     57494     hubei          114.0506       30.5978          118       176     2012      06        07        159              0.320792      25.991974       0.000000       0.366570       0.339000       0.282000       0.293500   -9999.000000
57494     57494     hubei          114.0506       30.5978          118       176     2012      06        08        160              0.315833      28.750702       0.105968       0.355290       0.441000   -9999.000000       0.283700       0.517000
57494     57494     hubei          114.0506       30.5978          118       176     2012      06        09        161              0.311583      29.438385       2.277260       0.351064       0.357000   -9999.000000   -9999.000000   -9999.000000
57494     57494     hubei          114.0506       30.5978          118       176     2012      06        10        162              0.317625      31.105591       0.950450       0.347387   -9999.000000       0.199000   -9999.000000       0.687000
57494     57494     hubei          114.0506       30.5978          118       176     2012      06        11        163              0.000000      28.143158       0.000000       0.349457   -9999.000000   -9999.000000       0.175200   -9999.000000
57494     57494     hubei          114.0506       30.5978          118       176     2012      06        12        164              0.311000      28.309601      43.997856       0.344963       0.300000       0.233600       0.280100   -9999.000000
57494     57494     hubei          114.0506       30.5978          118       176     2012      06        13        165              0.306417      29.756866       0.000000       0.339081       0.329000       0.233800       0.259700       0.614000
57494     57494     hubei          114.0506       30.5978          118       176     2012      06        14        166              0.304750      30.302887       0.000000       0.334207       0.401000   -9999.000000       0.279000   -9999.000000
57494     57494     hubei          114.0506       30.5978          118       176     2012      06        15        167              0.303750      29.599670       0.489787       0.333472       0.449000       0.053900   -9999.000000       0.675000
57494     57494     hubei          114.0506       30.5978          118       176     2012      06        16        168              0.302625      29.147888       0.000000       0.328275   -9999.000000   -9999.000000   -9999.000000   -9999.000000
57494     57494     hubei          114.0506       30.5978          118       176     2012      06        17        169              0.301458      29.768585       0.000000       0.324963   -9999.000000       0.255100       0.169300   -9999.000000
57494     57494     hubei          114.0506       30.5978          118       176     2012      06        18        170              0.300458      29.334137       0.845959       0.321550       0.306000       0.160400       0.247500       0.500000
57494     57494     hubei          114.0506       30.5978          118       176     2012      06        19        171              0.299625      30.087585       0.000000       0.320358       0.377500   -9999.000000       0.268300   -9999.000000
57494     57494     hubei          114.0506       30.5978          118       176     2012      06        20        172              0.298875      31.081665       0.000000       0.316676       0.374000       0.043100   -9999.000000       0.404000
57494     57494     hubei          114.0506       30.5978          118       176     2012      06        21        173              0.298375      31.351257       0.000000       0.314280   -9999.000000   -9999.000000   -9999.000000   -9999.000000
57494     57494     hubei          114.0506       30.5978          118       176     2012      06        22        174              0.305167      31.538330       4.880825       0.312594       0.383000       0.147100       0.198000       0.235000
57494     57494     hubei          114.0506       30.5978          118       176     2012      06        23        175              0.305167      30.440704       0.675519       0.324818       0.356000       0.282700       0.211500       0.617000
57494     57494     hubei          114.0506       30.5978          118       176     2012      06        24        176              0.302958      30.904114       0.764024       0.320025       0.354000   -9999.000000       0.200600   -9999.000000
57494     57494     hubei          114.0506       30.5978          118       176     2012      06        25        177              0.301500      31.279633       1.011378       0.313895       0.349000       0.203600       0.164100       0.239000
57494     57494     hubei          114.0506       30.5978          118       176     2012      06        26        178              0.317417      31.020447      67.674210       0.315023   -9999.000000   -9999.000000   -9999.000000   -9999.000000
57494     57494     hubei          114.0506       30.5978          118       176     2012      06        27        179              0.327458      28.290039      29.121460       0.387978       0.479000       0.373100   -9999.000000       1.000000
57494     57494     hubei          114.0506       30.5978          118       176     2012      06        28        180              0.326304      27.696747      18.297791       0.396957       0.474000       0.291100       0.114800   -9999.000000
57494     57494     hubei          114.0506       30.5978          118       176     2012      06        29        181              0.323417      28.537384      10.392778       0.384200       0.437500   -9999.000000       0.165400   -9999.000000
57494     57494     hubei          114.0506       30.5978          118       176     2012      06        30        182              0.318667      31.795380       1.258159       0.359089       0.403000       0.385700       0.162100   -9999.000000
57494     57494     hubei          114.0506       30.5978          118       176     2012      07        01        183              0.314409      30.744049       0.000000       0.354440   -9999.000000       0.148200   -9999.000000   -9999.000000
57494     57494     hubei          114.0506       30.5978          118       176     2012      07        02        184              0.308000      30.828308       2.474467       0.351578       0.424000   -9999.000000   -9999.000000       0.685000
57494     57494     hubei          114.0506       30.5978          118       176     2012      07        03        185              0.303958      31.797211       1.624678       0.346101       0.364500       0.178400       0.249200   -9999.000000
57494     57494     hubei          114.0506       30.5978          118       176     2012      07        04        186              0.301542      32.382172       0.314484       0.343510       0.400500   -9999.000000       0.212600       0.464000
57494     57494     hubei          114.0506       30.5978          118       176     2012      07        05        187              0.300208      31.883270       0.677611       0.340865       0.364000       0.300000       0.249700       0.262000
57494     57494     hubei          114.0506       30.5978          118       176     2012      07        06        188              0.299458      30.913391       2.262958       0.339579   -9999.000000       0.253300       0.259000   -9999.000000
57494     57494     hubei          114.0506       30.5978          118       176     2012      07        07        189              0.298375      33.044739       0.000000       0.335750   -9999.000000   -9999.000000   -9999.000000       0.411000
57494     57494     hubei          114.0506       30.5978          118       176     2012      07        08        190              0.297375      32.837860       0.000000       0.331477       0.424000       0.109200   -9999.000000   -9999.000000
57494     57494     hubei          114.0506       30.5978          118       176     2012      07        09        191              0.296500      32.725067       0.000000       0.326107       0.386000   -9999.000000       0.134400       0.456000
57494     57494     hubei          114.0506       30.5978          118       176     2012      07        10        192              0.296333      32.198853       0.239835       0.323364       0.398500   -9999.000000       0.204000   -9999.000000
57494     57494     hubei          114.0506       30.5978          118       176     2012      07        11        193              0.296208      32.302032       0.612813       0.322358       0.427000       0.188600       0.192200   -9999.000000
57494     57494     hubei          114.0506       30.5978          118       176     2012      07        12        194              0.317083      33.399475      41.108120       0.319917   -9999.000000   -9999.000000       0.185400       1.000000
57494     57494     hubei          114.0506       30.5978          118       176     2012      07        13        195              0.325957      28.689758     120.495529       0.383543       0.500000       0.271400   -9999.000000   -9999.000000
57494     57494     hubei          114.0506       30.5978          118       176     2012      07        14        196              0.323500      27.220337       3.002921       0.476392       0.411000   -9999.000000   -9999.000000       0.955000
57494     57494     hubei          114.0506       30.5978          118       176     2012      07        15        197              0.319750      29.287445       0.000000       0.429287       0.434000       0.276900       0.133400   -9999.000000
57494     57494     hubei          114.0506       30.5978          118       176     2012      07        16        198              0.316042      29.337860       3.021317       0.388218       0.470500   -9999.000000       0.257200   -9999.000000
57494     57494     hubei          114.0506       30.5978          118       176     2012      07        17        199              0.316708      30.107056       3.792584       0.376096   -9999.000000   -9999.000000       0.292700       0.748000
57494     57494     hubei          114.0506       30.5978          118       176     2012      07        18        200              0.318917      30.600037       0.000000       0.370678   -9999.000000       0.206400   -9999.000000   -9999.000000
57494     57494     hubei          114.0506       30.5978          118       176     2012      07        19        201              0.319792      30.966614       7.221646       0.363063       0.497000       0.141600   -9999.000000       0.682000
57494     57494     hubei          114.0506       30.5978          118       176     2012      07        20        202              0.316875      30.520630       5.516978       0.367979       0.443500   -9999.000000       0.237200   -9999.000000
57494     57494     hubei          114.0506       30.5978          118       176     2012      07        21        203              0.310045      32.272034       0.000000       0.357256       0.409500       0.173800       0.217200       0.468000
57494     57494     hubei          114.0506       30.5978          118       176     2012      07        22        204              0.310167      33.527679       2.389438       0.351698   -9999.000000   -9999.000000       0.232000       0.541000
57494     57494     hubei          114.0506       30.5978          118       176     2012      07        23        205              0.307667      32.483307       0.466458       0.354245   -9999.000000   -9999.000000       0.303100   -9999.000000
57494     57494     hubei          114.0506       30.5978          118       176     2012      07        24        206              0.303625      33.034241       0.000000       0.348276       0.436000       0.173200   -9999.000000       0.179000
57494     57494     hubei          114.0506       30.5978          118       176     2012      07        25        207              0.300917      33.206635       0.000000       0.342753       0.378000   -9999.000000   -9999.000000   -9999.000000
57494     57494     hubei          114.0506       30.5978          118       176     2012      07        26        208              0.299417      33.372559       0.249294       0.338911       0.395500       0.137900       0.166600       0.306000
57494     57494     hubei          114.0506       30.5978          118       176     2012      07        27        209              0.298417      33.376923       1.476123       0.335690       0.362000   -9999.000000       0.265600   -9999.000000
57494     57494     hubei          114.0506       30.5978          118       176     2012      07        28        210              0.297500      33.040710       0.000000       0.335898   -9999.000000       0.130700       0.279100   -9999.000000
57494     57494     hubei          114.0506       30.5978          118       176     2012      07        29        211              0.297292      33.633026       0.000000       0.330091       0.415000   -9999.000000       0.318000       0.201000
57494     57494     hubei          114.0506       30.5978          118       176     2012      07        30        212              0.296500      33.977234       5.014124       0.325720       0.347000   -9999.000000   -9999.000000   -9999.000000
57494     57494     hubei          114.0506       30.5978          118       176     2012      07        31        213              0.296292      33.912933       0.000000       0.321331       0.369500       0.068400   -9999.000000       0.499000
57494     57494     hubei          114.0506       30.5978          118       176     2012      08        01        214              0.295583      34.485107       9.158628       0.318837       0.384000   -9999.000000       0.209000   -9999.000000
57494     57494     hubei          114.0506       30.5978          118       176     2012      08        02        215              0.295375      33.306915       0.000000       0.315447       0.430000   -9999.000000       0.323800       0.479000
57494     57494     hubei          114.0506       30.5978          118       176     2012      08        03        216              0.295333      31.655701       5.209784       0.312557   -9999.000000       0.152300       0.366600       0.074000
57494     57494     hubei          114.0506       30.5978          118       176     2012      08        04        217              0.305917      31.176788      16.485798       0.317548   -9999.000000   -9999.000000   -9999.000000   -9999.000000
57494     57494     hubei          114.0506       30.5978          118       176     2012      08        05        218              0.309750      30.652649       0.000000       0.355803       0.393000   -9999.000000   -9999.000000       0.536000
57494     57494     hubei          114.0506       30.5978          118       176     2012      08        06        219              0.304417      32.056610       4.371469       0.342939       0.361000   -9999.000000       0.192100   -9999.000000
57494     57494     hubei          114.0506       30.5978          118       176     2012      08        07        220              0.301458      32.222839       4.953291       0.330829       0.420000   -9999.000000   -9999.000000       0.518000
57494     57494     hubei          114.0506       30.5978          118       176     2012      08        08        221              0.299625      32.002411       0.499714       0.323386   -9999.000000       0.203200       0.245000   -9999.000000
57494     57494     hubei          114.0506       30.5978          118       176     2012      08        09        222              0.298333      31.475372       0.212084       0.319440   -9999.000000   -9999.000000       0.277900   -9999.000000
57494     57494     hubei          114.0506       30.5978          118       176     2012      08        10        223              0.298667      30.587311       1.242101       0.317316       0.433000       0.170900   -9999.000000       0.453000
57494     57494     hubei          114.0506       30.5978          118       176     2012      08        11        224              0.302417      28.994263       4.436939       0.322664       0.442000       0.183800   -9999.000000   -9999.000000
57494     57494     hubei          114.0506       30.5978          118       176     2012      08        12        225              0.306667      30.712433       3.217296       0.328295       0.444000   -9999.000000       0.137900       0.697000
57494     57494     hubei          114.0506       30.5978          118       176     2012      08        13        226              0.310625      32.041809       1.008344       0.330672       0.499000       0.051000       0.314000   -9999.000000
57494     57494     hubei          114.0506       30.5978          118       176     2012      08        14        227              0.307708      29.866028       0.381929       0.329135   -9999.000000   -9999.000000       0.287700   -9999.000000
57494     57494     hubei          114.0506       30.5978          118       176     2012      08        15        228              0.304875      29.401123       0.000000       0.327302   -9999.000000   -9999.000000       0.294100       0.690000
57494     57494     hubei          114.0506       30.5978          118       176     2012      08        16        229              0.302583      31.149414       0.000000       0.320294       0.400000       0.207400   -9999.000000   -9999.000000
57494     57494     hubei          114.0506       30.5978          118       176     2012      08        17        230              0.300875      31.022949       0.000000       0.316554       0.431000   -9999.000000   -9999.000000       0.329000
57494     57494     hubei          114.0506       30.5978          118       176     2012      08        18        231              0.299417      32.665802       0.000000       0.312348       0.448000       0.154200       0.203900   -9999.000000
57494     57494     hubei          114.0506       30.5978          118       176     2012      08        19        232              0.298375      33.812683       0.000000       0.307364   -9999.000000   -9999.000000       0.268200       0.174000
57494     57494     hubei          114.0506       30.5978          118       176     2012      08        20        233              0.297750      33.580902      19.275133       0.302466       0.496000       0.109100       0.273300       0.618000
57494     57494     hubei          114.0506       30.5978          118       176     2012      08        21        234              0.298792      32.368469       1.390604       0.334268       0.491000       0.080500   -9999.000000   -9999.000000
57494     57494     hubei          114.0506       30.5978          118       176     2012      08        22        235              0.298000      27.024536       0.380850       0.343005       0.458000   -9999.000000   -9999.000000   -9999.000000
57494     57494     hubei          114.0506       30.5978          118       176     2012      08        23        236              0.297542      24.981049       2.627089       0.331504       0.468000       0.091000       0.241800   -9999.000000
57494     57494     hubei          114.0506       30.5978          118       176     2012      08        24        237              0.297083      25.613739      23.929939       0.327159   -9999.000000   -9999.000000       0.281100       0.313000
57494     57494     hubei          114.0506       30.5978          118       176     2012      08        25        238              0.000000      27.386658       0.000000       0.321028   -9999.000000   -9999.000000       0.309900   -9999.000000
57494     57494     hubei          114.0506       30.5978          118       176     2012      08        26        239              0.311292      29.628967       5.659861       0.315572       0.461500       0.278900       0.315200   -9999.000000
57494     57494     hubei          114.0506       30.5978          118       176     2012      08        27        240              0.317708      28.663452       7.928264       0.328286       0.439000   -9999.000000   -9999.000000       0.343000
57494     57494     hubei          114.0506       30.5978          118       176     2012      08        28        241              0.313500      27.409393       0.000000       0.342902       0.443000   -9999.000000   -9999.000000   -9999.000000
57494     57494     hubei          114.0506       30.5978          118       176     2012      08        29        242              0.308708      29.410828       0.000000       0.326897       0.486000       0.334300       0.115200       0.484000
57494     57494     hubei          114.0506       30.5978          118       176     2012      08        30        243              0.306000      30.775635       0.000000       0.318799   -9999.000000   -9999.000000       0.249500   -9999.000000
57494     57494     hubei          114.0506       30.5978          118       176     2012      08        31        244              0.304125      31.048523       0.000000       0.314020       0.491000       0.065800       0.271500       0.398000
57494     57494     hubei          114.0506       30.5978          118       176     2012      09        01        245              0.302625      31.935791       0.895784       0.308602       0.429000   -9999.000000       0.271600       0.397000
57494     57494     hubei          114.0506       30.5978          118       176     2012      09        02        246              0.302292      32.581055       5.027077       0.304421       0.458000       0.082600   -9999.000000   -9999.000000
57494     57494     hubei          114.0506       30.5978          118       176     2012      09        03        247              0.301792      26.502411       0.000000       0.323465       0.385000       0.109500       0.206000       0.472000
57494     57494     hubei          114.0506       30.5978          118       176     2012      09        04        248              0.300500      27.657623       0.000000       0.311184   -9999.000000   -9999.000000       0.178200   -9999.000000
57494     57494     hubei          114.0506       30.5978          118       176     2012      09        05        249              0.299542      27.579926       0.000000       0.305532   -9999.000000       0.215800       0.205000       0.422000
57494     57494     hubei          114.0506       30.5978          118       176     2012      09        06        250              0.298542      28.341064       0.000000       0.299136       0.406000   -9999.000000       0.230400   -9999.000000
57494     57494     hubei          114.0506       30.5978          118       176     2012      09        07        251              0.298333      28.608185       0.000000       0.296956       0.441500   -9999.000000   -9999.000000   -9999.000000
57494     57494     hubei          114.0506       30.5978          118       176     2012      09        08        252              0.307083      29.883392      54.280777       0.295632       0.478000       0.127700   -9999.000000       0.590000
57494     57494     hubei          114.0506       30.5978          118       176     2012      09        09        253              0.318833      26.808685       0.081523       0.354744       0.499000   -9999.000000       0.188100   -9999.000000
57494     57494     hubei          114.0506       30.5978          118       176     2012      09        10        254              0.314917      24.933807       0.000000       0.366618   -9999.000000       0.128100       0.302100       0.661000
57494     57494     hubei          114.0506       30.5978          118       176     2012      09        11        255              0.312042      27.195953       2.095645       0.345668       0.449000   -9999.000000       0.309800   -9999.000000
57494     57494     hubei          114.0506       30.5978          118       176     2012      09        12        256              0.320917      27.890564      13.096655       0.341030       0.346000   -9999.000000       0.356000   -9999.000000
57494     57494     hubei          114.0506       30.5978          118       176     2012      09        13        257              0.318957      23.102875       0.000000       0.361077   -9999.000000       0.170100   -9999.000000       0.638000
57494     57494     hubei          114.0506       30.5978          118       176     2012      09        14        258              0.315708      21.848572       0.000000       0.343687       0.333000   -9999.000000   -9999.000000   -9999.000000
57494     57494     hubei          114.0506       30.5978          118       176     2012      09        15        259              0.311833      23.893677       0.000000       0.332957   -9999.000000   -9999.000000       0.109500       0.419000
57494     57494     hubei          114.0506       30.5978          118       176     2012      09        16        260              0.308750      24.226837       0.000000       0.325900   -9999.000000   -9999.000000       0.278500   -9999.000000
57494     57494     hubei          114.0506       30.5978          118       176     2012      09        17        261              0.306833      24.001740       0.000000       0.321846       0.283000   -9999.000000       0.258200       0.305000
57494     57494     hubei          114.0506       30.5978          118       176     2012      09        18        262              0.305250      24.135651       0.000000       0.318752       0.288000       0.024900   -9999.000000       0.597000
57494     57494     hubei          114.0506       30.5978          118       176     2012      09        19        263              0.303833      25.034027       0.000000       0.315150       0.315000   -9999.000000   -9999.000000   -9999.000000
57494     57494     hubei          114.0506       30.5978          118       176     2012      09        20        264              0.302542      26.130066       0.896913       0.311213   -9999.000000       0.142800       0.259900       0.355000
57494     57494     hubei          114.0506       30.5978          118       176     2012      09        21        265              0.303958      27.166229       0.860684       0.309704   -9999.000000   -9999.000000       0.231800   -9999.000000
57494     57494     hubei          114.0506       30.5978          118       176     2012      09        22        266              0.303417      22.972168       1.277971       0.317536   -9999.000000   -9999.000000       0.260200       0.297000
57494     57494     hubei          114.0506       30.5978          118       176     2012      09        23        267              0.302833      25.713470       0.000000       0.312466       0.335000       0.065200       0.283400   -9999.000000
57494     57494     hubei          114.0506       30.5978          118       176     2012      09        24        268              0.302333      25.283905       0.000000       0.312900       0.391500   -9999.000000   -9999.000000   -9999.000000
57494     57494     hubei          114.0506       30.5978          118       176     2012      09        25        269              0.301292      26.395020       0.000000       0.308041       0.378000   -9999.000000   -9999.000000       0.238000
57494     57494     hubei          114.0506       30.5978          118       176     2012      09        26        270              0.300417      26.594788       0.000000       0.304121   -9999.000000       0.165700       0.187800   -9999.000000
57494     57494     hubei          114.0506       30.5978          118       176     2012      09        27        271              0.300286      24.832672       0.000000       0.306075   -9999.000000   -9999.000000       0.338700       0.447000
57494     57494     hubei          114.0506       30.5978          118       176     2012      09        28        272              0.298250      25.838104       0.000000       0.301002       0.280000   -9999.000000       0.309600   -9999.000000
57494     57494     hubei          114.0506       30.5978          118       176     2012      09        29        273              0.298250      22.181519       0.000000       0.294360       0.276000   -9999.000000       0.360400       0.278000
57494     57494     hubei          114.0506       30.5978          118       176     2012      09        30        274              0.297583      22.195160       0.000000       0.293251       0.342000   -9999.000000   -9999.000000       0.180000
57494     57494     hubei          114.0506       30.5978          118       176     2012      10        01        275              0.297375      21.129791       0.000000       0.296315   -9999.000000       0.071200   -9999.000000   -9999.000000
57494     57494     hubei          114.0506       30.5978          118       176     2012      10        02        276              0.297250      22.674286       0.000000       0.293109   -9999.000000   -9999.000000       0.089100       0.400000
57494     57494     hubei          114.0506       30.5978          118       176     2012      10        03        277              0.297042      23.688232       0.000000       0.291151       0.226000   -9999.000000       0.185700   -9999.000000
57494     57494     hubei          114.0506       30.5978          118       176     2012      10        04        278              0.297000      22.899811       0.398277       0.292812       0.309500       0.181300       0.193100       0.354000
57494     57494     hubei          114.0506       30.5978          118       176     2012      10        05        279              0.297667      23.901917       3.558747       0.291964   -9999.000000   -9999.000000   -9999.000000   -9999.000000
57494     57494     hubei          114.0506       30.5978          118       176     2012      10        06        280              0.298875      20.706146       0.000000       0.310303       0.340000       0.197400   -9999.000000   -9999.000000
57494     57494     hubei          114.0506       30.5978          118       176     2012      10        07        281              0.299000      23.569489       0.805450       0.304281   -9999.000000   -9999.000000       0.192700       0.392000
57494     57494     hubei          114.0506       30.5978          118       176     2012      10        08        282              0.298667      22.385284       0.238420       0.307755       0.349000   -9999.000000       0.145500   -9999.000000
57494     57494     hubei          114.0506       30.5978          118       176     2012      10        09        283              0.298333      23.302216       0.000000       0.303516       0.247000       0.510900       0.157500       0.417000
57494     57494     hubei          114.0506       30.5978          118       176     2012      10        10        284              0.297625      23.468353       0.000000       0.299417       0.238000   -9999.000000       0.184100   -9999.000000
57494     57494     hubei          114.0506       30.5978          118       176     2012      10        11        285              0.297250      23.415497       0.000000       0.295365       0.207000       0.137900   -9999.000000   -9999.000000
57494     57494     hubei          114.0506       30.5978          118       176     2012      10        12        286              0.297000      22.696503       0.000000       0.294369   -9999.000000   -9999.000000   -9999.000000       0.330000
57494     57494     hubei          114.0506       30.5978          118       176     2012      10        13        287              0.297000      21.196198       0.000000       0.296365   -9999.000000   -9999.000000       0.065300   -9999.000000
57494     57494     hubei          114.0506       30.5978          118       176     2012      10        14        288              0.297042      20.282166       3.387860       0.298517       0.218000       0.037700       0.178800       0.316000
57494     57494     hubei          114.0506       30.5978          118       176     2012      10        15        289              0.301958      21.391418       9.422647       0.303955       0.274000   -9999.000000       0.255500   -9999.000000
57494     57494     hubei          114.0506       30.5978          118       176     2012      10        16        290              0.314375      20.747803      11.659380       0.333965       0.283000       0.367900       0.298300       0.848000
57494     57494     hubei          114.0506       30.5978          118       176     2012      10        17        291              0.311833      18.445435       0.000000       0.356248   -9999.000000   -9999.000000   -9999.000000       0.777000
57494     57494     hubei          114.0506       30.5978          118       176     2012      10        18        292              0.309500      18.513092       0.000000       0.331950   -9999.000000       0.156200   -9999.000000   -9999.000000
57494     57494     hubei          114.0506       30.5978          118       176     2012      10        19        293              0.307696      19.746613       0.000000       0.324872   -9999.000000       0.083700       0.148200       0.314000
57494     57494     hubei          114.0506       30.5978          118       176     2012      10        20        294              0.306875      20.694519       0.489912       0.322049       0.196000   -9999.000000       0.233700   -9999.000000
57494     57494     hubei          114.0506       30.5978          118       176     2012      10        21        295              0.314875      23.169800      12.026783       0.320102       0.229000       0.353800       0.265700       0.598000
57494     57494     hubei          114.0506       30.5978          118       176     2012      10        22        296              0.315583      23.162384       2.996288       0.339644   -9999.000000       0.291600   -9999.000000   -9999.000000
57494     57494     hubei          114.0506       30.5978          118       176     2012      10        23        297              0.313000      16.993134       0.272097       0.336558   -9999.000000   -9999.000000   -9999.000000   -9999.000000
57494     57494     hubei          114.0506       30.5978          118       176     2012      10        24        298              0.313167      18.760986       1.435470       0.327255   -9999.000000       0.124700       0.152500       0.565000
57494     57494     hubei          114.0506       30.5978          118       176     2012      10        25        299              0.000000      16.523102       6.109666       0.331215       0.251000   -9999.000000       0.171200   -9999.000000
57494     57494     hubei          114.0506       30.5978          118       176     2012      10        26        300              0.319250      17.867096      26.731340       0.339466   -9999.000000   -9999.000000       0.207500       0.996000
57494     57494     hubei          114.0506       30.5978          118       176     2012      10        27        301              0.317250      17.029449       0.253736       0.377429   -9999.000000   -9999.000000       0.228100   -9999.000000
57494     57494     hubei          114.0506       30.5978          118       176     2012      10        28        302              0.000000      18.332672      12.742352       0.353635   -9999.000000   -9999.000000   -9999.000000       0.695000
57494     57494     hubei          114.0506       30.5978          118       176     2012      10        29        303              0.322250      20.310059      21.356050       0.352648   -9999.000000       0.131800   -9999.000000       1.000000
57494     57494     hubei          114.0506       30.5978          118       176     2012      10        30        304              0.319042      16.990997       2.693196       0.384031   -9999.000000   -9999.000000       0.050600   -9999.000000
57494     57494     hubei          114.0506       30.5978          118       176     2012      10        31        305              0.317583      16.821777       0.000000       0.356971   -9999.000000   -9999.000000       0.189200       0.627000
57494     57494     hubei          114.0506       30.5978          118       176     2012      11        01        306              0.316542      16.936005       0.000000       0.347463   -9999.000000       0.201600       0.213400   -9999.000000
57494     57494     hubei          114.0506       30.5978          118       176     2012      11        02        307              0.315542      16.078827       0.000000       0.342283   -9999.000000   -9999.000000   -9999.000000       0.619000
57494     57494     hubei          114.0506       30.5978          118       176     2012      11        03        308              0.317000      17.469177       3.882997       0.337415   -9999.000000       0.339900   -9999.000000   -9999.000000
57494     57494     hubei          114.0506       30.5978          118       176     2012      11        04        309              0.316565      13.167358       0.000000       0.345416   -9999.000000   -9999.000000       0.184100   -9999.000000
57494     57494     hubei          114.0506       30.5978          118       176     2012      11        05        310              0.315375      14.055725       0.000000       0.336753   -9999.000000   -9999.000000       0.145500       0.392000
57494     57494     hubei          114.0506       30.5978          118       176     2012      11        06        311              0.314375      13.086243       1.666553       0.332554   -9999.000000       0.176100       0.181500   -9999.000000
57494     57494     hubei          114.0506       30.5978          118       176     2012      11        07        312              0.314000      13.746887       0.000000       0.329842   -9999.000000   -9999.000000       0.216500       0.665000
57494     57494     hubei          114.0506       30.5978          118       176     2012      11        08        313              0.314000      14.045868       0.427705       0.329367   -9999.000000   -9999.000000   -9999.000000   -9999.000000
57494     57494     hubei          114.0506       30.5978          118       176     2012      11        09        314              0.314750      13.622589       1.882524       0.329577   -9999.000000       0.096400   -9999.000000   -9999.000000
57494     57494     hubei          114.0506       30.5978          118       176     2012      11        10        315              0.314583      12.082001       0.000000       0.335683   -9999.000000   -9999.000000       0.101500       0.717000
57494     57494     hubei          114.0506       30.5978          118       176     2012      11        11        316              0.313833      11.888672       0.650074       0.332216   -9999.000000       0.051000       0.177400   -9999.000000
57494     57494     hubei          114.0506       30.5978          118       176     2012      11        12        317              0.313292      12.272614       0.000000       0.328475   -9999.000000   -9999.000000       0.142800       0.421000
57494     57494     hubei          114.0506       30.5978          118       176     2012      11        13        318              0.000000      13.453461       0.000000       0.326766   -9999.000000   -9999.000000       0.178600   -9999.000000
57494     57494     hubei          114.0506       30.5978          118       176     2012      11        14        319              0.312417      15.409088       0.164922       0.325675   -9999.000000       0.223600   -9999.000000       0.547000
57494     57494     hubei          114.0506       30.5978          118       176     2012      11        15        320              0.313208      15.330322       1.184615       0.324326   -9999.000000   -9999.000000   -9999.000000       0.527000
57494     57494     hubei          114.0506       30.5978          118       176     2012      11        16        321              0.315583      11.280396       2.479846       0.328629   -9999.000000       0.040800       0.065700   -9999.000000
57494     57494     hubei          114.0506       30.5978          118       176     2012      11        17        322              0.000000      10.152191       0.000000       0.335170   -9999.000000   -9999.000000       0.147600       0.325000
57494     57494     hubei          114.0506       30.5978          118       176     2012      11        18        323              0.314417      11.622467       0.000000       0.329481   -9999.000000       0.159000       0.169200   -9999.000000
57494     57494     hubei          114.0506       30.5978          118       176     2012      11        19        324              0.313667      13.202820       0.260469       0.327303   -9999.000000       0.201200   -9999.000000       0.392000
57494     57494     hubei          114.0506       30.5978          118       176     2012      11        20        325              0.315375      13.789429       3.914078       0.325932   -9999.000000   -9999.000000   -9999.000000   -9999.000000
57494     57494     hubei          114.0506       30.5978          118       176     2012      11        21        326              0.317042      13.550110       0.282931       0.334596   -9999.000000       0.193600       0.147100       0.623000
57494     57494     hubei          114.0506       30.5978          118       176     2012      11        22        327              0.320542      11.691986      11.761803       0.334054   -9999.000000   -9999.000000       0.134600       0.686000
57494     57494     hubei          114.0506       30.5978          118       176     2012      11        23        328              0.319833      11.179016       0.000000       0.356447   -9999.000000   -9999.000000       0.142400   -9999.000000
57494     57494     hubei          114.0506       30.5978          118       176     2012      11        24        329              0.319000       9.269714       0.885974       0.344462   -9999.000000       0.146800       0.168500       0.767000
57494     57494     hubei          114.0506       30.5978          118       176     2012      11        25        330              0.318417      10.605621       0.657512       0.340773   -9999.000000   -9999.000000   -9999.000000   -9999.000000
57494     57494     hubei          114.0506       30.5978          118       176     2012      11        26        331              0.317500       8.650024       0.000000       0.338448   -9999.000000       0.248000   -9999.000000       0.529000
57494     57494     hubei          114.0506       30.5978          118       176     2012      11        27        332              0.317000       9.808746       0.326154       0.333938   -9999.000000   -9999.000000       0.058200       0.534000
57494     57494     hubei          114.0506       30.5978          118       176     2012      11        28        333              0.317125      10.581299       0.000000       0.332683   -9999.000000   -9999.000000       0.159100   -9999.000000
57494     57494     hubei          114.0506       30.5978          118       176     2012      11        29        334              0.317000      10.592377       1.117841       0.331071   -9999.000000       0.201900       0.147400       0.701000
57494     57494     hubei          114.0506       30.5978          118       176     2012      11        30        335              0.317000      10.847809       0.212769       0.332608   -9999.000000   -9999.000000       0.179600   -9999.000000
57494     57494     hubei          114.0506       30.5978          118       176     2012      12        01        336              0.318625      11.088867       2.989290       0.331585   -9999.000000       0.389600   -9999.000000       0.667000
57494     57494     hubei          114.0506       30.5978          118       176     2012      12        02        337              0.317667       7.170990       0.000000       0.338921   -9999.000000       0.262100   -9999.000000   -9999.000000
57494     57494     hubei          114.0506       30.5978          118       176     2012      12        03        338              0.317208       5.686981       0.000000       0.334896   -9999.000000   -9999.000000       0.084900   -9999.000000
57494     57494     hubei          114.0506       30.5978          118       176     2012      12        04        339              0.316792       8.402924       0.000000       0.332335   -9999.000000       0.258700       0.129800       0.528000
57494     57494     hubei          114.0506       30.5978          118       176     2012      12        05        340              0.316333       7.788940       0.000000       0.331515   -9999.000000   -9999.000000       0.156200   -9999.000000
57494     57494     hubei          114.0506       30.5978          118       176     2012      12        06        341              0.316000       9.414825       0.000000       0.329344   -9999.000000   -9999.000000   -9999.000000       0.630000
57494     57494     hubei          114.0506       30.5978          118       176     2012      12        07        342              0.315708       9.294342       0.366412       0.328695   -9999.000000       0.279600   -9999.000000   -9999.000000
57494     57494     hubei          114.0506       30.5978          118       176     2012      12        08        343              0.315333       9.988739       0.000000       0.327953   -9999.000000   -9999.000000       0.106800   -9999.000000
57494     57494     hubei          114.0506       30.5978          118       176     2012      12        09        344              0.315000       8.938660       0.223166       0.325821   -9999.000000       0.038300       0.121600       0.610000
57494     57494     hubei          114.0506       30.5978          118       176     2012      12        10        345              0.315000       7.822449       1.545689       0.325221   -9999.000000   -9999.000000       0.128700   -9999.000000
57494     57494     hubei          114.0506       30.5978          118       176     2012      12        11        346              0.314667       5.984131       0.000000       0.326704   -9999.000000   -9999.000000       0.139500       0.277000
57494     57494     hubei          114.0506       30.5978          118       176     2012      12        12        347              0.314833       7.209381       0.233132       0.325609   -9999.000000       0.089000   -9999.000000   -9999.000000
57494     57494     hubei          114.0506       30.5978          118       176     2012      12        13        348              0.319875       8.263489      11.752993       0.326197   -9999.000000   -9999.000000   -9999.000000       0.817000
57494     57494     hubei          114.0506       30.5978          118       176     2012      12        14        349              0.321208       7.390411       5.672016       0.355805   -9999.000000       0.302200       0.031000       0.761000
57494     57494     hubei          114.0506       30.5978          118       176     2012      12        15        350              0.000000       4.994019       0.000000       0.353090   -9999.000000   -9999.000000       0.151800   -9999.000000
57494     57494     hubei          114.0506       30.5978          118       176     2012      12        16        351              0.318667       6.595459       0.206910       0.344907   -9999.000000       0.223200       0.160900       0.521000
57494     57494     hubei          114.0506       30.5978          118       176     2012      12        17        352              0.320542       6.330170      14.901699       0.340740   -9999.000000       0.089100       0.157700   -9999.000000
57494     57494     hubei          114.0506       30.5978          118       176     2012      12        18        353              0.319708       5.268433       0.000000       0.363253   -9999.000000   -9999.000000   -9999.000000       0.413000
57494     57494     hubei          114.0506       30.5978          118       176     2012      12        19        354              0.318000       4.951538       0.269196       0.350999   -9999.000000   -9999.000000       0.167100   -9999.000000
57494     57494     hubei          114.0506       30.5978          118       176     2012      12        20        355              0.000000       5.552124       2.982499       0.344321   -9999.000000       0.294100       0.121800   -9999.000000
57494     57494     hubei          114.0506       30.5978          118       176     2012      12        21        356              0.319042       2.489838       0.000000       0.347403   -9999.000000   -9999.000000       0.144500       0.439000
57494     57494     hubei          114.0506       30.5978          118       176     2012      12        22        357              0.317667       3.202515       3.241469       0.342254   -9999.000000       0.187600       0.140100   -9999.000000
57494     57494     hubei          114.0506       30.5978          118       176     2012      12        23        358              0.316875       2.816528       1.312853       0.333250   -9999.000000   -9999.000000   -9999.000000       0.167000
57494     57494     hubei          114.0506       30.5978          118       176     2012      12        24        359              0.316389       3.206299       2.396307       0.324303   -9999.000000   -9999.000000   -9999.000000   -9999.000000
57494     57494     hubei          114.0506       30.5978          118       176     2012      12        25        360              0.316000       5.003998       0.000000       0.333239   -9999.000000       0.222700       0.069100       0.343000
57494     57494     hubei          114.0506       30.5978          118       176     2012      12        26        361              0.000000       2.976654       0.312698       0.332344   -9999.000000   -9999.000000       0.124500       0.434000
57494     57494     hubei          114.0506       30.5978          118       176     2012      12        27        362              0.318900       1.522766       0.529529       0.318649   -9999.000000   -9999.000000       0.113700   -9999.000000
57494     57494     hubei          114.0506       30.5978          118       176     2012      12        28        363              0.318000       1.512085       5.977856       0.320975   -9999.000000   -9999.000000       0.144900       0.625000
57494     57494     hubei          114.0506       30.5978          118       176     2012      12        29        364              0.000000       2.300842       4.432606       0.338124   -9999.000000   -9999.000000   -9999.000000   -9999.000000
57494     57494     hubei          114.0506       30.5978          118       176     2012      12        30        365              0.000000       1.464142       0.271069       0.329087   -9999.000000       0.192600   -9999.000000       0.062000
57494     57494     hubei          114.0506       30.5978          118       176     2012      12        31        366              0.317133       2.243408       0.000000       0.310466   -9999.000000   -9999.000000       0.027200   -9999.000000
