# Supplementary material for: Research on Fusing Multisatellite Soil Moisture Data Based on Bayesian Model Averaging
Source: Hindawi journal article supplement (doi:10.1155/2018/9310838), 2018-06-25
Supplement: f1 [file 9310838.f1.zip › 2012_sm00-10cm_daily_ZDB_ZHY_57496_366days_allin.txt]

57496     57496     hubei          114.5197       30.2197          119       178     2012      01        01        001              0.000000   -9999.000000       0.000000   -9999.000000   -9999.000000   -9999.000000       0.126400   -9999.000000
57496     57496     hubei          114.5197       30.2197          119       178     2012      01        02        002              0.000000       5.114319       0.000000       0.345138   -9999.000000   -9999.000000       0.131100   -9999.000000
57496     57496     hubei          114.5197       30.2197          119       178     2012      01        03        003              0.000000       6.090332       0.000000       0.348848   -9999.000000   -9999.000000   -9999.000000       0.171000
57496     57496     hubei          114.5197       30.2197          119       178     2012      01        04        004              0.000000       2.988708       0.000000       0.341705   -9999.000000   -9999.000000   -9999.000000   -9999.000000
57496     57496     hubei          114.5197       30.2197          119       178     2012      01        05        005              0.000000       4.109070       0.000000       0.343880   -9999.000000   -9999.000000       0.040200       0.055000
57496     57496     hubei          114.5197       30.2197          119       178     2012      01        06        006              0.000000       2.829132       0.000000       0.340575   -9999.000000   -9999.000000       0.129900   -9999.000000
57496     57496     hubei          114.5197       30.2197          119       178     2012      01        07        007              0.000000       5.281677       0.000000       0.343522   -9999.000000   -9999.000000       0.129700   -9999.000000
57496     57496     hubei          114.5197       30.2197          119       178     2012      01        08        008              0.000000       3.539337       0.000000       0.344359   -9999.000000   -9999.000000       0.138800       0.152000
57496     57496     hubei          114.5197       30.2197          119       178     2012      01        09        009              0.000000       4.078735       0.771245       0.344217   -9999.000000   -9999.000000   -9999.000000   -9999.000000
57496     57496     hubei          114.5197       30.2197          119       178     2012      01        10        010              0.000000       5.927368       0.642818       0.343301   -9999.000000   -9999.000000   -9999.000000       0.231000
57496     57496     hubei          114.5197       30.2197          119       178     2012      01        11        011              0.000000       6.315765       0.000000       0.342160   -9999.000000   -9999.000000       0.087300   -9999.000000
57496     57496     hubei          114.5197       30.2197          119       178     2012      01        12        012              0.000000       4.837708       0.467140       0.342080   -9999.000000   -9999.000000       0.119200       0.398000
57496     57496     hubei          114.5197       30.2197          119       178     2012      01        13        013              0.000000       4.609070       7.747766       0.342724   -9999.000000       0.041200       0.115000       0.716000
57496     57496     hubei          114.5197       30.2197          119       178     2012      01        14        014              0.000000       4.725403       0.825500       0.351034   -9999.000000   -9999.000000   -9999.000000   -9999.000000
57496     57496     hubei          114.5197       30.2197          119       178     2012      01        15        015              0.000000       4.288116       0.145957       0.353107   -9999.000000   -9999.000000   -9999.000000       1.000000
57496     57496     hubei          114.5197       30.2197          119       178     2012      01        16        016              0.000000       3.870514       0.000000       0.347354   -9999.000000   -9999.000000       0.094500   -9999.000000
57496     57496     hubei          114.5197       30.2197          119       178     2012      01        17        017              0.000000       5.095978       1.193250       0.345476   -9999.000000   -9999.000000       0.109000       0.749000
57496     57496     hubei          114.5197       30.2197          119       178     2012      01        18        018              0.000000       5.394745       2.284289       0.346685   -9999.000000       0.067200       0.117500   -9999.000000
57496     57496     hubei          114.5197       30.2197          119       178     2012      01        19        019              0.000000       5.629669       0.348657       0.350099   -9999.000000   -9999.000000       0.123200   -9999.000000
57496     57496     hubei          114.5197       30.2197          119       178     2012      01        20        020              0.000000       5.642822       4.062653       0.345991   -9999.000000   -9999.000000   -9999.000000       1.000000
57496     57496     hubei          114.5197       30.2197          119       178     2012      01        21        021              0.000000       5.071259       1.972566       0.352821   -9999.000000   -9999.000000   -9999.000000   -9999.000000
57496     57496     hubei          114.5197       30.2197          119       178     2012      01        22        022              0.000000       2.294617       1.203041       0.342029   -9999.000000   -9999.000000       0.040400       0.997000
57496     57496     hubei          114.5197       30.2197          119       178     2012      01        23        023              0.000000       1.692322       0.508355       0.318248   -9999.000000   -9999.000000       0.138000   -9999.000000
57496     57496     hubei          114.5197       30.2197          119       178     2012      01        24        024              0.000000       2.401978       0.000000       0.333073   -9999.000000   -9999.000000   -9999.000000   -9999.000000
57496     57496     hubei          114.5197       30.2197          119       178     2012      01        25        025              0.000000       3.278320       0.629084       0.330156   -9999.000000       0.076200       0.139300       1.000000
57496     57496     hubei          114.5197       30.2197          119       178     2012      01        26        026              0.000000       4.109650       0.421376       0.336371   -9999.000000       0.009800   -9999.000000   -9999.000000
57496     57496     hubei          114.5197       30.2197          119       178     2012      01        27        027              0.000000       5.732422       0.000000       0.340701   -9999.000000   -9999.000000       0.133000       0.243000
57496     57496     hubei          114.5197       30.2197          119       178     2012      01        28        028              0.000000       4.084534       0.000000       0.341790   -9999.000000   -9999.000000       0.110300   -9999.000000
57496     57496     hubei          114.5197       30.2197          119       178     2012      01        29        029              0.000000       5.304352       0.428154       0.341316   -9999.000000   -9999.000000       0.144000       1.000000
57496     57496     hubei          114.5197       30.2197          119       178     2012      01        30        030              0.000000       5.673035       1.816367       0.341969   -9999.000000   -9999.000000       0.144100       0.679000
57496     57496     hubei          114.5197       30.2197          119       178     2012      01        31        031              0.000000       4.917694       0.000000       0.341247   -9999.000000       0.090500   -9999.000000   -9999.000000
57496     57496     hubei          114.5197       30.2197          119       178     2012      02        01        032              0.000000       7.659302       0.000000       0.339247   -9999.000000   -9999.000000   -9999.000000       0.409000
57496     57496     hubei          114.5197       30.2197          119       178     2012      02        02        033              0.000000       6.484650       0.000000       0.338221   -9999.000000   -9999.000000       0.072000   -9999.000000
57496     57496     hubei          114.5197       30.2197          119       178     2012      02        03        034              0.000000       3.566559       0.000000       0.336399   -9999.000000   -9999.000000       0.132100       0.407000
57496     57496     hubei          114.5197       30.2197          119       178     2012      02        04        035              0.000000       6.251373       1.361691       0.336087   -9999.000000   -9999.000000       0.126400   -9999.000000
57496     57496     hubei          114.5197       30.2197          119       178     2012      02        05        036              0.000000       4.737610       9.412479       0.337044   -9999.000000       0.042200       0.160000   -9999.000000
57496     57496     hubei          114.5197       30.2197          119       178     2012      02        06        037              0.000000       6.436584       0.305973       0.352673   -9999.000000   -9999.000000   -9999.000000       0.667000
57496     57496     hubei          114.5197       30.2197          119       178     2012      02        07        038              0.000000       6.217712       0.000000       0.347189   -9999.000000   -9999.000000   -9999.000000   -9999.000000
57496     57496     hubei          114.5197       30.2197          119       178     2012      02        08        039              0.000000       5.133026       0.000000       0.339003   -9999.000000   -9999.000000       0.048800       0.213000
57496     57496     hubei          114.5197       30.2197          119       178     2012      02        09        040              0.000000       5.090179       0.000000       0.337516   -9999.000000   -9999.000000       0.129600   -9999.000000
57496     57496     hubei          114.5197       30.2197          119       178     2012      02        10        041              0.000000       3.126923       0.000000       0.335395   -9999.000000   -9999.000000       0.128200       0.663000
57496     57496     hubei          114.5197       30.2197          119       178     2012      02        11        042              0.000000       4.712189       0.000000       0.335949   -9999.000000   -9999.000000   -9999.000000       0.011000
57496     57496     hubei          114.5197       30.2197          119       178     2012      02        12        043              0.000000       7.234100       0.727449       0.335203   -9999.000000   -9999.000000   -9999.000000   -9999.000000
57496     57496     hubei          114.5197       30.2197          119       178     2012      02        13        044              0.000000       5.808105       1.587777       0.337030   -9999.000000   -9999.000000   -9999.000000       1.000000
57496     57496     hubei          114.5197       30.2197          119       178     2012      02        14        045              0.000000       5.260986       8.433556       0.340869   -9999.000000   -9999.000000       0.154100   -9999.000000
57496     57496     hubei          114.5197       30.2197          119       178     2012      02        15        046              0.000000       4.735474       2.541687       0.353900   -9999.000000   -9999.000000       0.176600       1.000000
57496     57496     hubei          114.5197       30.2197          119       178     2012      02        16        047              0.000000       4.962646       0.000000       0.351672   -9999.000000   -9999.000000       0.158700   -9999.000000
57496     57496     hubei          114.5197       30.2197          119       178     2012      02        17        048              0.000000       6.367249       0.000000       0.344795   -9999.000000   -9999.000000   -9999.000000   -9999.000000
57496     57496     hubei          114.5197       30.2197          119       178     2012      02        18        049              0.000000       7.529510       0.000000       0.340317   -9999.000000       0.131500   -9999.000000       0.624000
57496     57496     hubei          114.5197       30.2197          119       178     2012      02        19        050              0.000000       7.023895       0.000000       0.337854   -9999.000000   -9999.000000       0.085200   -9999.000000
57496     57496     hubei          114.5197       30.2197          119       178     2012      02        20        051              0.000000       8.754669       0.136558       0.335668   -9999.000000   -9999.000000       0.139800       0.531000
57496     57496     hubei          114.5197       30.2197          119       178     2012      02        21        052              0.000000       7.091156       8.100601       0.336854   -9999.000000   -9999.000000   -9999.000000   -9999.000000
57496     57496     hubei          114.5197       30.2197          119       178     2012      02        22        053              0.000000       7.790527      17.402176       0.347927   -9999.000000   -9999.000000       0.153000   -9999.000000
57496     57496     hubei          114.5197       30.2197          119       178     2012      02        23        054              0.000000       8.547577       2.602619       0.371348   -9999.000000       0.110500   -9999.000000       1.000000
57496     57496     hubei          114.5197       30.2197          119       178     2012      02        24        055              0.000000       8.586456       0.281078       0.356240   -9999.000000   -9999.000000   -9999.000000   -9999.000000
57496     57496     hubei          114.5197       30.2197          119       178     2012      02        25        056              0.000000       5.960724       0.372259       0.350780   -9999.000000   -9999.000000       0.056900       1.000000
57496     57496     hubei          114.5197       30.2197          119       178     2012      02        26        057              0.000000       5.047089       0.000000       0.348419   -9999.000000   -9999.000000       0.144800   -9999.000000
57496     57496     hubei          114.5197       30.2197          119       178     2012      02        27        058              0.000000       6.404541       0.000000       0.346277   -9999.000000   -9999.000000   -9999.000000       0.947000
57496     57496     hubei          114.5197       30.2197          119       178     2012      02        28        059              0.000000       6.304169       0.158318       0.344875   -9999.000000       0.059400   -9999.000000       0.962000
57496     57496     hubei          114.5197       30.2197          119       178     2012      02        29        060              0.000000   -9999.000000       0.260366   -9999.000000   -9999.000000   -9999.000000   -9999.000000   -9999.000000
57496     57496     hubei          114.5197       30.2197          119       178     2012      03        01        061              0.000000       9.079834       0.258118       0.342727   -9999.000000   -9999.000000       0.138100       0.423000
57496     57496     hubei          114.5197       30.2197          119       178     2012      03        02        062              0.000000       8.322845      10.219660       0.343245   -9999.000000       0.015500       0.155900   -9999.000000
57496     57496     hubei          114.5197       30.2197          119       178     2012      03        03        063              0.000000       8.142334      14.975959       0.350772   -9999.000000   -9999.000000       0.173100       1.000000
57496     57496     hubei          114.5197       30.2197          119       178     2012      03        04        064              0.000000       7.353577       6.997212       0.368787   -9999.000000   -9999.000000       0.168400       1.000000
57496     57496     hubei          114.5197       30.2197          119       178     2012      03        05        065              0.000000       5.650909       0.977591       0.369250   -9999.000000   -9999.000000   -9999.000000   -9999.000000
57496     57496     hubei          114.5197       30.2197          119       178     2012      03        06        066              0.000000       7.118713       6.654601       0.355920   -9999.000000   -9999.000000   -9999.000000       0.721000
57496     57496     hubei          114.5197       30.2197          119       178     2012      03        07        067              0.000000       8.736969       6.411390       0.360050   -9999.000000   -9999.000000       0.102000   -9999.000000
57496     57496     hubei          114.5197       30.2197          119       178     2012      03        08        068              0.000000       7.739166       3.695488       0.364470   -9999.000000   -9999.000000       0.151700       1.000000
57496     57496     hubei          114.5197       30.2197          119       178     2012      03        09        069              0.000000       6.987213       2.292987       0.363384   -9999.000000   -9999.000000       0.143100   -9999.000000
57496     57496     hubei          114.5197       30.2197          119       178     2012      03        10        070              0.000000       7.385040       0.944271       0.355800   -9999.000000   -9999.000000       0.144100       0.822000
57496     57496     hubei          114.5197       30.2197          119       178     2012      03        11        071              0.000000      10.354645       1.051623       0.352419   -9999.000000   -9999.000000   -9999.000000       0.527000
57496     57496     hubei          114.5197       30.2197          119       178     2012      03        12        072              0.000000       9.514740       0.523649       0.351570   -9999.000000       0.139500   -9999.000000   -9999.000000
57496     57496     hubei          114.5197       30.2197          119       178     2012      03        13        073              0.000000      11.595001       0.000000       0.349286   -9999.000000   -9999.000000       0.063500       0.798000
57496     57496     hubei          114.5197       30.2197          119       178     2012      03        14        074              0.000000      13.670349       2.977048       0.347342   -9999.000000   -9999.000000       0.145600   -9999.000000
57496     57496     hubei          114.5197       30.2197          119       178     2012      03        15        075              0.000000      15.001404       3.392512       0.348255   -9999.000000   -9999.000000       0.148200       1.000000
57496     57496     hubei          114.5197       30.2197          119       178     2012      03        16        076              0.000000      12.716949       0.555195       0.357121   -9999.000000   -9999.000000   -9999.000000   -9999.000000
57496     57496     hubei          114.5197       30.2197          119       178     2012      03        17        077              0.000000      11.659912       1.730915       0.350993   -9999.000000   -9999.000000   -9999.000000   -9999.000000
57496     57496     hubei          114.5197       30.2197          119       178     2012      03        18        078              0.000000      12.406799       0.998614       0.352323   -9999.000000   -9999.000000       0.134100       0.746000
57496     57496     hubei          114.5197       30.2197          119       178     2012      03        19        079              0.000000      16.773254       0.292843       0.347087   -9999.000000   -9999.000000       0.131900   -9999.000000
57496     57496     hubei          114.5197       30.2197          119       178     2012      03        20        080              0.000000      10.083984       0.111937       0.347365   -9999.000000   -9999.000000       0.144000       0.962000
57496     57496     hubei          114.5197       30.2197          119       178     2012      03        21        081              0.000000       9.495361       5.149623       0.346720   -9999.000000   -9999.000000       0.140800   -9999.000000
57496     57496     hubei          114.5197       30.2197          119       178     2012      03        22        082              0.000000      12.199280      24.635447       0.349679   -9999.000000   -9999.000000   -9999.000000   -9999.000000
57496     57496     hubei          114.5197       30.2197          119       178     2012      03        23        083              0.000000       8.576263       1.191225       0.378993   -9999.000000   -9999.000000   -9999.000000       0.914000
57496     57496     hubei          114.5197       30.2197          119       178     2012      03        24        084              0.000000      12.709442       0.000000       0.360597   -9999.000000   -9999.000000   -9999.000000   -9999.000000
57496     57496     hubei          114.5197       30.2197          119       178     2012      03        25        085              0.000000      15.019348       0.000000       0.350757   -9999.000000   -9999.000000       0.131800       0.604000
57496     57496     hubei          114.5197       30.2197          119       178     2012      03        26        086              0.000000      17.243225       0.220836       0.346783   -9999.000000   -9999.000000       0.133300   -9999.000000
57496     57496     hubei          114.5197       30.2197          119       178     2012      03        27        087              0.000000      19.062836       0.205036       0.343768   -9999.000000   -9999.000000       0.137200       0.151000
57496     57496     hubei          114.5197       30.2197          119       178     2012      03        28        088              0.000000      20.392578       0.370681       0.341259   -9999.000000   -9999.000000   -9999.000000       0.932000
57496     57496     hubei          114.5197       30.2197          119       178     2012      03        29        089              0.000000      20.771545      10.100227       0.339615   -9999.000000   -9999.000000   -9999.000000   -9999.000000
57496     57496     hubei          114.5197       30.2197          119       178     2012      03        30        090              0.000000      17.712769       6.008914       0.354797   -9999.000000       0.032000       0.106400       0.710000
57496     57496     hubei          114.5197       30.2197          119       178     2012      03        31        091              0.000000      16.221771       0.000000       0.363067   -9999.000000   -9999.000000       0.145800   -9999.000000
57496     57496     hubei          114.5197       30.2197          119       178     2012      04        01        092              0.000000      18.087585       1.378634       0.346732   -9999.000000   -9999.000000       0.132700       0.347000
57496     57496     hubei          114.5197       30.2197          119       178     2012      04        02        093              0.000000      20.040161       0.000000       0.341163   -9999.000000   -9999.000000   -9999.000000   -9999.000000
57496     57496     hubei          114.5197       30.2197          119       178     2012      04        03        094              0.000000      20.443176       0.106332       0.337370   -9999.000000   -9999.000000   -9999.000000   -9999.000000
57496     57496     hubei          114.5197       30.2197          119       178     2012      04        04        095              0.000000      18.110931       4.564224       0.335961   -9999.000000   -9999.000000       0.124600       0.289000
57496     57496     hubei          114.5197       30.2197          119       178     2012      04        05        096              0.000000      14.789673       0.096788       0.348749   -9999.000000   -9999.000000       0.124700   -9999.000000
57496     57496     hubei          114.5197       30.2197          119       178     2012      04        06        097              0.000000      18.279816       0.000000       0.341719   -9999.000000   -9999.000000       0.137000       0.561000
57496     57496     hubei          114.5197       30.2197          119       178     2012      04        07        098              0.000000      20.971008       0.038517       0.336866   -9999.000000   -9999.000000       0.127800   -9999.000000
57496     57496     hubei          114.5197       30.2197          119       178     2012      04        08        099              0.000000      21.720032       0.242050       0.332774   -9999.000000   -9999.000000   -9999.000000       0.483000
57496     57496     hubei          114.5197       30.2197          119       178     2012      04        09        100              0.000000      19.251923       3.267121       0.334101   -9999.000000   -9999.000000   -9999.000000       0.938000
57496     57496     hubei          114.5197       30.2197          119       178     2012      04        10        101              0.000000      18.746887      15.986101       0.342611   -9999.000000   -9999.000000       0.088500   -9999.000000
57496     57496     hubei          114.5197       30.2197          119       178     2012      04        11        102              0.000000      19.731812       0.495333       0.363131   -9999.000000   -9999.000000       0.211700       1.000000
57496     57496     hubei          114.5197       30.2197          119       178     2012      04        12        103              0.000000      21.453949      15.967731       0.349057       0.322000   -9999.000000       0.190800   -9999.000000
57496     57496     hubei          114.5197       30.2197          119       178     2012      04        13        104              0.000000      16.772095       0.088440       0.366137   -9999.000000   -9999.000000       0.210500       0.925000
57496     57496     hubei          114.5197       30.2197          119       178     2012      04        14        105              0.000000      18.792511       0.053778       0.350338   -9999.000000   -9999.000000   -9999.000000   -9999.000000
57496     57496     hubei          114.5197       30.2197          119       178     2012      04        15        106              0.000000      16.936981       0.173280       0.347070   -9999.000000   -9999.000000   -9999.000000   -9999.000000
57496     57496     hubei          114.5197       30.2197          119       178     2012      04        16        107              0.000000      17.726715       0.406489       0.344006   -9999.000000   -9999.000000       0.199100       0.407000
57496     57496     hubei          114.5197       30.2197          119       178     2012      04        17        108              0.000000      20.964081       0.044801       0.340983   -9999.000000       0.016700       0.221500   -9999.000000
57496     57496     hubei          114.5197       30.2197          119       178     2012      04        18        109              0.000000      20.636353       0.215049       0.340637   -9999.000000   -9999.000000   -9999.000000       0.765000
57496     57496     hubei          114.5197       30.2197          119       178     2012      04        19        110              0.000000      20.865540       0.000000       0.339141   -9999.000000   -9999.000000   -9999.000000   -9999.000000
57496     57496     hubei          114.5197       30.2197          119       178     2012      04        20        111              0.000000      23.855255       0.421141       0.334439   -9999.000000   -9999.000000   -9999.000000   -9999.000000
57496     57496     hubei          114.5197       30.2197          119       178     2012      04        21        112              0.000000      19.292084       0.116378       0.336463   -9999.000000   -9999.000000       0.157700       0.231000
57496     57496     hubei          114.5197       30.2197          119       178     2012      04        22        113              0.000000      22.211639       8.796822       0.331910   -9999.000000   -9999.000000       0.194200   -9999.000000
57496     57496     hubei          114.5197       30.2197          119       178     2012      04        23        114              0.000000      25.068390       8.483838       0.342255   -9999.000000   -9999.000000       0.318900       1.000000
57496     57496     hubei          114.5197       30.2197          119       178     2012      04        24        115              0.000000      25.268768      22.782812       0.353248   -9999.000000   -9999.000000       0.354900   -9999.000000
57496     57496     hubei          114.5197       30.2197          119       178     2012      04        25        116              0.000000      21.704895       1.353906       0.375466   -9999.000000   -9999.000000   -9999.000000       0.672000
57496     57496     hubei          114.5197       30.2197          119       178     2012      04        26        117              0.000000      20.923401       0.191657       0.353066   -9999.000000   -9999.000000   -9999.000000       0.783000
57496     57496     hubei          114.5197       30.2197          119       178     2012      04        27        118              0.000000      23.079590       1.735059       0.342621   -9999.000000   -9999.000000   -9999.000000   -9999.000000
57496     57496     hubei          114.5197       30.2197          119       178     2012      04        28        119              0.000000      25.081909      31.815678       0.340310   -9999.000000   -9999.000000       0.329300       0.728000
57496     57496     hubei          114.5197       30.2197          119       178     2012      04        29        120              0.000000      25.481537       0.490039       0.372009   -9999.000000   -9999.000000       0.319700   -9999.000000
57496     57496     hubei          114.5197       30.2197          119       178     2012      04        30        121              0.000000      25.025787      24.315136       0.357688   -9999.000000   -9999.000000       0.305100       1.000000
57496     57496     hubei          114.5197       30.2197          119       178     2012      05        01        122              0.000000      23.272552       0.897502       0.379126   -9999.000000   -9999.000000   -9999.000000   -9999.000000
57496     57496     hubei          114.5197       30.2197          119       178     2012      05        02        123              0.000000      22.712311       7.177594       0.361166   -9999.000000   -9999.000000       0.295800   -9999.000000
57496     57496     hubei          114.5197       30.2197          119       178     2012      05        03        124              0.000000      22.919037       3.539479       0.362409   -9999.000000   -9999.000000       0.235600       0.798000
57496     57496     hubei          114.5197       30.2197          119       178     2012      05        04        125              0.000000      22.430756       0.855801       0.365901   -9999.000000   -9999.000000       0.281300   -9999.000000
57496     57496     hubei          114.5197       30.2197          119       178     2012      05        05        126              0.000000      24.827484       0.362040       0.356756   -9999.000000   -9999.000000       0.259000       0.989000
57496     57496     hubei          114.5197       30.2197          119       178     2012      05        06        127              0.000000      27.416229       0.000000       0.350912   -9999.000000   -9999.000000   -9999.000000   -9999.000000
57496     57496     hubei          114.5197       30.2197          119       178     2012      05        07        128              0.000000      28.862701      35.405624       0.346122   -9999.000000   -9999.000000   -9999.000000       1.000000
57496     57496     hubei          114.5197       30.2197          119       178     2012      05        08        129              0.000000      28.319550       1.291236       0.375084   -9999.000000   -9999.000000       0.160600       0.771000
57496     57496     hubei          114.5197       30.2197          119       178     2012      05        09        130              0.000000      28.030396       5.644893       0.366548       0.354000   -9999.000000       0.263700   -9999.000000
57496     57496     hubei          114.5197       30.2197          119       178     2012      05        10        131              0.000000      23.981903       0.800741       0.366985   -9999.000000   -9999.000000       0.244000       0.619000
57496     57496     hubei          114.5197       30.2197          119       178     2012      05        11        132              0.000000      27.637848       0.220035       0.355749   -9999.000000   -9999.000000       0.260100   -9999.000000
57496     57496     hubei          114.5197       30.2197          119       178     2012      05        12        133              0.000000      28.771210      25.782539       0.350219       0.359000   -9999.000000   -9999.000000       1.000000
57496     57496     hubei          114.5197       30.2197          119       178     2012      05        13        134              0.000000      24.172394      17.403393       0.377930   -9999.000000       0.114300   -9999.000000   -9999.000000
57496     57496     hubei          114.5197       30.2197          119       178     2012      05        14        135              0.346714      25.345795      12.242814       0.372778       0.389000   -9999.000000       0.099600   -9999.000000
57496     57496     hubei          114.5197       30.2197          119       178     2012      05        15        136              0.345208      21.164673       0.080150       0.382830   -9999.000000   -9999.000000       0.263400       0.815000
57496     57496     hubei          114.5197       30.2197          119       178     2012      05        16        137              0.330500      23.343964       0.079063       0.369334   -9999.000000   -9999.000000       0.241600   -9999.000000
57496     57496     hubei          114.5197       30.2197          119       178     2012      05        17        138              0.319167      25.681305       0.030992       0.361976   -9999.000000   -9999.000000   -9999.000000       0.915000
57496     57496     hubei          114.5197       30.2197          119       178     2012      05        18        139              0.311250      27.695953      29.873219       0.354940   -9999.000000   -9999.000000   -9999.000000   -9999.000000
57496     57496     hubei          114.5197       30.2197          119       178     2012      05        19        140              0.348167      25.220276       1.816604       0.367381   -9999.000000   -9999.000000       0.259100   -9999.000000
57496     57496     hubei          114.5197       30.2197          119       178     2012      05        20        141              0.336875      24.961670       0.000000       0.373127   -9999.000000   -9999.000000       0.209400       0.659000
57496     57496     hubei          114.5197       30.2197          119       178     2012      05        21        142              0.321792      25.400818       1.453349       0.360341   -9999.000000   -9999.000000       0.319100   -9999.000000
57496     57496     hubei          114.5197       30.2197          119       178     2012      05        22        143              0.315208      26.103333       6.230220       0.354259   -9999.000000   -9999.000000       0.328900       1.000000
57496     57496     hubei          114.5197       30.2197          119       178     2012      05        23        144              0.329250      24.438110      12.759931       0.359691   -9999.000000   -9999.000000   -9999.000000   -9999.000000
57496     57496     hubei          114.5197       30.2197          119       178     2012      05        24        145              0.339292      22.873871       8.579069       0.368353       0.491000   -9999.000000   -9999.000000       1.000000
57496     57496     hubei          114.5197       30.2197          119       178     2012      05        25        146              0.000000      22.964264       1.267666       0.370672   -9999.000000   -9999.000000       0.143700       1.000000
57496     57496     hubei          114.5197       30.2197          119       178     2012      05        26        147              0.335417      23.732941       2.632675       0.362873   -9999.000000   -9999.000000       0.318800   -9999.000000
57496     57496     hubei          114.5197       30.2197          119       178     2012      05        27        148              0.327458      25.925873       0.233936       0.356137   -9999.000000   -9999.000000       0.285400       0.494000
57496     57496     hubei          114.5197       30.2197          119       178     2012      05        28        149              0.320542      27.814850      18.417385       0.350563   -9999.000000   -9999.000000       0.293000   -9999.000000
57496     57496     hubei          114.5197       30.2197          119       178     2012      05        29        150              0.346375      28.779999      59.452557       0.357044   -9999.000000   -9999.000000   -9999.000000       0.517000
57496     57496     hubei          114.5197       30.2197          119       178     2012      05        30        151              0.356167      23.159515       2.916219       0.439615   -9999.000000       0.108400   -9999.000000   -9999.000000
57496     57496     hubei          114.5197       30.2197          119       178     2012      05        31        152              0.354333      26.368774       0.052860       0.396587   -9999.000000   -9999.000000   -9999.000000   -9999.000000
57496     57496     hubei          114.5197       30.2197          119       178     2012      06        01        153              0.335667      26.778625       1.664503       0.375145   -9999.000000   -9999.000000       0.337800       1.000000
57496     57496     hubei          114.5197       30.2197          119       178     2012      06        02        154              0.336625      24.181580       0.530504       0.370383   -9999.000000   -9999.000000       0.303200   -9999.000000
57496     57496     hubei          114.5197       30.2197          119       178     2012      06        03        155              0.334458      26.377350       1.356844       0.363183   -9999.000000   -9999.000000   -9999.000000       0.824000
57496     57496     hubei          114.5197       30.2197          119       178     2012      06        04        156              0.332958      25.950836       2.977438       0.358607       0.455000   -9999.000000   -9999.000000   -9999.000000
57496     57496     hubei          114.5197       30.2197          119       178     2012      06        05        157              0.334167      25.815979       6.101911       0.360028   -9999.000000       0.075800       0.250600       0.690000
57496     57496     hubei          114.5197       30.2197          119       178     2012      06        06        158              0.347917      27.686920       2.009795       0.357267   -9999.000000   -9999.000000       0.199800       0.644000
57496     57496     hubei          114.5197       30.2197          119       178     2012      06        07        159              0.340083      26.573975       0.231149       0.359712   -9999.000000   -9999.000000       0.213700   -9999.000000
57496     57496     hubei          114.5197       30.2197          119       178     2012      06        08        160              0.335458      29.004059       0.000000       0.351048       0.391000   -9999.000000       0.200100       0.579000
57496     57496     hubei          114.5197       30.2197          119       178     2012      06        09        161              0.327667      29.923309       0.422365       0.346261       0.356000   -9999.000000   -9999.000000   -9999.000000
57496     57496     hubei          114.5197       30.2197          119       178     2012      06        10        162              0.317333      31.216827       1.615737       0.343242   -9999.000000       0.204500   -9999.000000       1.000000
57496     57496     hubei          114.5197       30.2197          119       178     2012      06        11        163              0.000000      28.504608       0.161704       0.347121   -9999.000000   -9999.000000       0.109800   -9999.000000
57496     57496     hubei          114.5197       30.2197          119       178     2012      06        12        164              0.282375      29.378784       0.886282       0.341231   -9999.000000   -9999.000000       0.294800   -9999.000000
57496     57496     hubei          114.5197       30.2197          119       178     2012      06        13        165              0.256583      29.933441       0.308316       0.336610   -9999.000000   -9999.000000       0.255500       0.657000
57496     57496     hubei          114.5197       30.2197          119       178     2012      06        14        166              0.234708      30.881775       0.447649       0.332132   -9999.000000   -9999.000000       0.261100   -9999.000000
57496     57496     hubei          114.5197       30.2197          119       178     2012      06        15        167              0.219667      29.578156       0.000000       0.331485   -9999.000000       0.034000   -9999.000000       1.000000
57496     57496     hubei          114.5197       30.2197          119       178     2012      06        16        168              0.205250      29.803833       8.236059       0.327549   -9999.000000   -9999.000000   -9999.000000   -9999.000000
57496     57496     hubei          114.5197       30.2197          119       178     2012      06        17        169              0.190583      29.897552       0.431825       0.323010   -9999.000000   -9999.000000       0.136900   -9999.000000
57496     57496     hubei          114.5197       30.2197          119       178     2012      06        18        170              0.177125      29.312347       0.000000       0.320256   -9999.000000   -9999.000000       0.265000       0.566000
57496     57496     hubei          114.5197       30.2197          119       178     2012      06        19        171              0.165167      30.617157       0.000000       0.318193       0.393000   -9999.000000       0.239900   -9999.000000
57496     57496     hubei          114.5197       30.2197          119       178     2012      06        20        172              0.153500      31.209656       0.000000       0.314820       0.350000   -9999.000000   -9999.000000       0.463000
57496     57496     hubei          114.5197       30.2197          119       178     2012      06        21        173              0.144333      31.185089       0.794622       0.311321   -9999.000000   -9999.000000   -9999.000000   -9999.000000
57496     57496     hubei          114.5197       30.2197          119       178     2012      06        22        174              0.137125      31.614838       0.927705       0.310112   -9999.000000   -9999.000000       0.244000       0.713000
57496     57496     hubei          114.5197       30.2197          119       178     2012      06        23        175              0.131500      30.303101       0.000000       0.312123   -9999.000000       0.036800       0.208900       0.791000
57496     57496     hubei          114.5197       30.2197          119       178     2012      06        24        176              0.127792      30.748962       0.000000       0.307663       0.361000   -9999.000000       0.248500   -9999.000000
57496     57496     hubei          114.5197       30.2197          119       178     2012      06        25        177              0.124625      31.563385       3.510785       0.303317       0.379000   -9999.000000       0.188600       0.470000
57496     57496     hubei          114.5197       30.2197          119       178     2012      06        26        178              0.152917      31.232208      56.806717       0.307938   -9999.000000   -9999.000000   -9999.000000   -9999.000000
57496     57496     hubei          114.5197       30.2197          119       178     2012      06        27        179              0.369833      28.503754      51.940544       0.384438   -9999.000000   -9999.000000   -9999.000000       1.000000
57496     57496     hubei          114.5197       30.2197          119       178     2012      06        28        180              0.390609      28.372223      43.754192       0.400244       0.489000       0.398000       0.116300   -9999.000000
57496     57496     hubei          114.5197       30.2197          119       178     2012      06        29        181              0.358250      28.934418       0.156105       0.394039       0.441000   -9999.000000       0.221100   -9999.000000
57496     57496     hubei          114.5197       30.2197          119       178     2012      06        30        182              0.338042      32.791138       5.537916       0.367728       0.402000   -9999.000000       0.142900   -9999.000000
57496     57496     hubei          114.5197       30.2197          119       178     2012      07        01        183              0.329091      32.115784       0.049246       0.367433   -9999.000000   -9999.000000       0.208900   -9999.000000
57496     57496     hubei          114.5197       30.2197          119       178     2012      07        02        184              0.307958      32.258514       0.000000       0.359594   -9999.000000   -9999.000000   -9999.000000       0.535000
57496     57496     hubei          114.5197       30.2197          119       178     2012      07        03        185              0.276583      32.103851       0.000000       0.352010   -9999.000000       0.183400   -9999.000000   -9999.000000
57496     57496     hubei          114.5197       30.2197          119       178     2012      07        04        186              0.244833      32.683716       0.000000       0.346990       0.456000   -9999.000000       0.214300       0.566000
57496     57496     hubei          114.5197       30.2197          119       178     2012      07        05        187              0.222667      32.694855       0.000000       0.343954       0.443000   -9999.000000       0.316300       0.456000
57496     57496     hubei          114.5197       30.2197          119       178     2012      07        06        188              0.199083      31.913177       0.000000       0.343899   -9999.000000   -9999.000000       0.285100   -9999.000000
57496     57496     hubei          114.5197       30.2197          119       178     2012      07        07        189              0.180000      33.741638       0.000000       0.338956   -9999.000000   -9999.000000   -9999.000000       0.501000
57496     57496     hubei          114.5197       30.2197          119       178     2012      07        08        190              0.171792      33.412018       0.000000       0.334747   -9999.000000   -9999.000000   -9999.000000   -9999.000000
57496     57496     hubei          114.5197       30.2197          119       178     2012      07        09        191              0.159125      33.132843       0.391102       0.331040       0.471000   -9999.000000       0.163000       0.859000
57496     57496     hubei          114.5197       30.2197          119       178     2012      07        10        192              0.147417      32.703430       2.701386       0.329742       0.461000   -9999.000000       0.212300   -9999.000000
57496     57496     hubei          114.5197       30.2197          119       178     2012      07        11        193              0.140250      33.080902       0.172685       0.325290       0.444000   -9999.000000       0.248500   -9999.000000
57496     57496     hubei          114.5197       30.2197          119       178     2012      07        12        194              0.143833      33.375580      16.504326       0.321311   -9999.000000   -9999.000000       0.189600       1.000000
57496     57496     hubei          114.5197       30.2197          119       178     2012      07        13        195              0.313609      29.925751      65.997093       0.346608       0.499000   -9999.000000   -9999.000000   -9999.000000
57496     57496     hubei          114.5197       30.2197          119       178     2012      07        14        196              0.380750      28.309082       0.253204       0.400696       0.500000   -9999.000000   -9999.000000       0.959000
57496     57496     hubei          114.5197       30.2197          119       178     2012      07        15        197              0.328708      29.338379       0.000000       0.368237       0.493000   -9999.000000       0.083600   -9999.000000
57496     57496     hubei          114.5197       30.2197          119       178     2012      07        16        198              0.316625      30.663086       0.000000       0.354104       0.460000       0.155100       0.275400   -9999.000000
57496     57496     hubei          114.5197       30.2197          119       178     2012      07        17        199              0.307833      30.811493       0.322682       0.349056       0.452000   -9999.000000       0.253400       0.857000
57496     57496     hubei          114.5197       30.2197          119       178     2012      07        18        200              0.288250      31.102661       0.000000       0.346915   -9999.000000   -9999.000000   -9999.000000   -9999.000000
57496     57496     hubei          114.5197       30.2197          119       178     2012      07        19        201              0.264542      31.563171       5.063686       0.343727   -9999.000000   -9999.000000   -9999.000000       0.919000
57496     57496     hubei          114.5197       30.2197          119       178     2012      07        20        202              0.245792      31.465118       0.090709       0.351019       0.490000   -9999.000000       0.253900   -9999.000000
57496     57496     hubei          114.5197       30.2197          119       178     2012      07        21        203              0.221591      32.986847       2.262325       0.342759       0.447000   -9999.000000       0.219600       0.362000
57496     57496     hubei          114.5197       30.2197          119       178     2012      07        22        204              0.200542      34.360565       0.646387       0.337611       0.394000   -9999.000000       0.262900       0.859000
57496     57496     hubei          114.5197       30.2197          119       178     2012      07        23        205              0.179250      34.172729       0.000000       0.335121   -9999.000000   -9999.000000       0.291700   -9999.000000
57496     57496     hubei          114.5197       30.2197          119       178     2012      07        24        206              0.161375      33.902252       0.640549       0.330373   -9999.000000   -9999.000000   -9999.000000       0.827000
57496     57496     hubei          114.5197       30.2197          119       178     2012      07        25        207              0.148625      33.924561       1.074815       0.326086       0.452000   -9999.000000   -9999.000000   -9999.000000
57496     57496     hubei          114.5197       30.2197          119       178     2012      07        26        208              0.141708      33.819122       0.898822       0.321539       0.419000   -9999.000000       0.186700       0.529000
57496     57496     hubei          114.5197       30.2197          119       178     2012      07        27        209              0.137167      33.918549       0.000000       0.318486       0.384000   -9999.000000       0.275100   -9999.000000
57496     57496     hubei          114.5197       30.2197          119       178     2012      07        28        210              0.134750      33.935455       0.198320       0.314174   -9999.000000   -9999.000000       0.257700   -9999.000000
57496     57496     hubei          114.5197       30.2197          119       178     2012      07        29        211              0.150333      33.789429       0.000000       0.311753   -9999.000000   -9999.000000       0.285000       0.071000
57496     57496     hubei          114.5197       30.2197          119       178     2012      07        30        212              0.156833      34.503998       0.562406       0.307816   -9999.000000   -9999.000000   -9999.000000   -9999.000000
57496     57496     hubei          114.5197       30.2197          119       178     2012      07        31        213              0.149000      34.604950       0.000000       0.306014       0.419000   -9999.000000   -9999.000000       0.515000
57496     57496     hubei          114.5197       30.2197          119       178     2012      08        01        214              0.208958      34.794891       0.596399       0.301611       0.476000   -9999.000000       0.132700   -9999.000000
57496     57496     hubei          114.5197       30.2197          119       178     2012      08        02        215              0.252500      34.170837       0.616028       0.298051       0.428000   -9999.000000       0.343800       0.218000
57496     57496     hubei          114.5197       30.2197          119       178     2012      08        03        216              0.228958      33.007202       0.000000       0.296549   -9999.000000   -9999.000000       0.314300       0.277000
57496     57496     hubei          114.5197       30.2197          119       178     2012      08        04        217              0.213083      32.086426       8.238371       0.293385   -9999.000000   -9999.000000   -9999.000000   -9999.000000
57496     57496     hubei          114.5197       30.2197          119       178     2012      08        05        218              0.197750      32.200592       0.318462       0.316281       0.488000   -9999.000000   -9999.000000       0.732000
57496     57496     hubei          114.5197       30.2197          119       178     2012      08        06        219              0.177000      32.955139       0.445509       0.312432       0.491000   -9999.000000       0.276000   -9999.000000
57496     57496     hubei          114.5197       30.2197          119       178     2012      08        07        220              0.194917      32.997467       0.000000       0.305298       0.461000   -9999.000000   -9999.000000       0.738000
57496     57496     hubei          114.5197       30.2197          119       178     2012      08        08        221              0.233375      33.173065       0.000000       0.298539   -9999.000000   -9999.000000       0.286100   -9999.000000
57496     57496     hubei          114.5197       30.2197          119       178     2012      08        09        222              0.255583      32.323151       2.861216       0.294133       0.493000   -9999.000000       0.270400   -9999.000000
57496     57496     hubei          114.5197       30.2197          119       178     2012      08        10        223              0.270833      30.137970       4.077691       0.307141       0.500000   -9999.000000   -9999.000000       0.398000
57496     57496     hubei          114.5197       30.2197          119       178     2012      08        11        224              0.274708      28.987305      11.807823       0.320085       0.469500   -9999.000000   -9999.000000   -9999.000000
57496     57496     hubei          114.5197       30.2197          119       178     2012      08        12        225              0.281750      30.167633      11.666052       0.340044       0.455500   -9999.000000       0.132500       1.000000
57496     57496     hubei          114.5197       30.2197          119       178     2012      08        13        226              0.318000      30.965240       8.875170       0.347247       0.492000   -9999.000000       0.314400   -9999.000000
57496     57496     hubei          114.5197       30.2197          119       178     2012      08        14        227              0.311458      29.411987       0.366544       0.357881   -9999.000000   -9999.000000       0.242000   -9999.000000
57496     57496     hubei          114.5197       30.2197          119       178     2012      08        15        228              0.305333      30.561523       0.000000       0.339294   -9999.000000   -9999.000000       0.265100       0.506000
57496     57496     hubei          114.5197       30.2197          119       178     2012      08        16        229              0.297333      31.999146       0.000000       0.329480       0.465000   -9999.000000   -9999.000000   -9999.000000
57496     57496     hubei          114.5197       30.2197          119       178     2012      08        17        230              0.289000      31.994324      11.246994       0.322889       0.433000   -9999.000000   -9999.000000       0.383000
57496     57496     hubei          114.5197       30.2197          119       178     2012      08        18        231              0.279083      33.426453       0.000000       0.316935       0.390000   -9999.000000       0.156300   -9999.000000
57496     57496     hubei          114.5197       30.2197          119       178     2012      08        19        232              0.271542      34.001556       0.496560       0.310437   -9999.000000   -9999.000000       0.267900       0.052000
57496     57496     hubei          114.5197       30.2197          119       178     2012      08        20        233              0.264667      33.564331       1.315570       0.306259   -9999.000000   -9999.000000       0.213100       0.889000
57496     57496     hubei          114.5197       30.2197          119       178     2012      08        21        234              0.262333      33.168732       1.246081       0.305167       0.486500   -9999.000000   -9999.000000   -9999.000000
57496     57496     hubei          114.5197       30.2197          119       178     2012      08        22        235              0.313333      28.720245       5.786796       0.309154       0.500000   -9999.000000   -9999.000000   -9999.000000
57496     57496     hubei          114.5197       30.2197          119       178     2012      08        23        236              0.313875      25.753693       1.216888       0.330525   -9999.000000   -9999.000000       0.234800   -9999.000000
57496     57496     hubei          114.5197       30.2197          119       178     2012      08        24        237              0.305500      25.975067       2.766178       0.324495   -9999.000000   -9999.000000       0.207800       0.634000
57496     57496     hubei          114.5197       30.2197          119       178     2012      08        25        238              0.000000      28.191681       0.000000       0.315380   -9999.000000   -9999.000000       0.243500   -9999.000000
57496     57496     hubei          114.5197       30.2197          119       178     2012      08        26        239              0.287875      30.351715       2.348403       0.310249   -9999.000000   -9999.000000       0.216100   -9999.000000
57496     57496     hubei          114.5197       30.2197          119       178     2012      08        27        240              0.281375      29.878601       8.263946       0.312857       0.500000   -9999.000000   -9999.000000       0.324000
57496     57496     hubei          114.5197       30.2197          119       178     2012      08        28        241              0.273583      27.914124       0.906090       0.333860       0.476000       0.108100   -9999.000000   -9999.000000
57496     57496     hubei          114.5197       30.2197          119       178     2012      08        29        242              0.262958      29.941162       0.000000       0.317957       0.390000   -9999.000000       0.075900       0.706000
57496     57496     hubei          114.5197       30.2197          119       178     2012      08        30        243              0.254750      31.346741       0.555613       0.309874   -9999.000000   -9999.000000       0.206300   -9999.000000
57496     57496     hubei          114.5197       30.2197          119       178     2012      08        31        244              0.248333      31.696838       0.000000       0.304799   -9999.000000   -9999.000000       0.174700       0.230000
57496     57496     hubei          114.5197       30.2197          119       178     2012      09        01        245              0.247500      32.541809       1.551112       0.298667       0.443000   -9999.000000       0.196300       0.247000
57496     57496     hubei          114.5197       30.2197          119       178     2012      09        02        246              0.318208      33.106262      40.033375       0.299014       0.482000   -9999.000000   -9999.000000   -9999.000000
57496     57496     hubei          114.5197       30.2197          119       178     2012      09        03        247              0.320958      27.112885       0.330542       0.401860       0.384000   -9999.000000   -9999.000000       0.280000
57496     57496     hubei          114.5197       30.2197          119       178     2012      09        04        248              0.317542      27.582428       0.000000       0.342216   -9999.000000   -9999.000000       0.163900   -9999.000000
57496     57496     hubei          114.5197       30.2197          119       178     2012      09        05        249              0.315167      27.879608       0.060165       0.329693   -9999.000000   -9999.000000       0.238500       0.702000
57496     57496     hubei          114.5197       30.2197          119       178     2012      09        06        250              0.312125      28.226105       0.029962       0.319945   -9999.000000   -9999.000000       0.224400   -9999.000000
57496     57496     hubei          114.5197       30.2197          119       178     2012      09        07        251              0.309208      28.717133       0.000000       0.316302       0.442000   -9999.000000   -9999.000000   -9999.000000
57496     57496     hubei          114.5197       30.2197          119       178     2012      09        08        252              0.308417      30.213867      49.619961       0.312603       0.423000   -9999.000000   -9999.000000       0.534000
57496     57496     hubei          114.5197       30.2197          119       178     2012      09        09        253              0.338625      28.707397       4.264524       0.347259       0.480000   -9999.000000       0.203700   -9999.000000
57496     57496     hubei          114.5197       30.2197          119       178     2012      09        10        254              0.326000      25.584900       0.000000       0.387596   -9999.000000   -9999.000000       0.201400       0.752000
57496     57496     hubei          114.5197       30.2197          119       178     2012      09        11        255              0.324542      28.291626       6.900246       0.347603   -9999.000000   -9999.000000       0.244500   -9999.000000
57496     57496     hubei          114.5197       30.2197          119       178     2012      09        12        256              0.340167      29.380188      20.931517       0.346734       0.360000   -9999.000000       0.226300   -9999.000000
57496     57496     hubei          114.5197       30.2197          119       178     2012      09        13        257              0.347042      23.475891       0.280508       0.369190   -9999.000000   -9999.000000   -9999.000000       0.698000
57496     57496     hubei          114.5197       30.2197          119       178     2012      09        14        258              0.328333      22.216339       0.198144       0.352606   -9999.000000   -9999.000000   -9999.000000   -9999.000000
57496     57496     hubei          114.5197       30.2197          119       178     2012      09        15        259              0.322750      24.673523       0.435542       0.338518   -9999.000000   -9999.000000       0.031800       0.313000
57496     57496     hubei          114.5197       30.2197          119       178     2012      09        16        260              0.319083      25.122223       0.000000       0.330514   -9999.000000   -9999.000000       0.220900   -9999.000000
57496     57496     hubei          114.5197       30.2197          119       178     2012      09        17        261              0.314792      24.813141       0.211708       0.325512   -9999.000000   -9999.000000       0.208000       0.160000
57496     57496     hubei          114.5197       30.2197          119       178     2012      09        18        262              0.309417      24.391785       0.000000       0.323962   -9999.000000   -9999.000000       0.208300       0.744000
57496     57496     hubei          114.5197       30.2197          119       178     2012      09        19        263              0.302250      25.432068       0.000000       0.320745   -9999.000000   -9999.000000   -9999.000000   -9999.000000
57496     57496     hubei          114.5197       30.2197          119       178     2012      09        20        264              0.294500      26.766388       0.818763       0.317051   -9999.000000   -9999.000000   -9999.000000       0.598000
57496     57496     hubei          114.5197       30.2197          119       178     2012      09        21        265              0.295500      27.525360       3.512468       0.315095   -9999.000000   -9999.000000       0.164400   -9999.000000
57496     57496     hubei          114.5197       30.2197          119       178     2012      09        22        266              0.295375      23.012787       1.200191       0.331440   -9999.000000   -9999.000000       0.235800       0.854000
57496     57496     hubei          114.5197       30.2197          119       178     2012      09        23        267              0.295000      25.828369       0.219555       0.324449   -9999.000000   -9999.000000       0.226900   -9999.000000
57496     57496     hubei          114.5197       30.2197          119       178     2012      09        24        268              0.293042      25.632996       0.000000       0.326317   -9999.000000   -9999.000000   -9999.000000   -9999.000000
57496     57496     hubei          114.5197       30.2197          119       178     2012      09        25        269              0.287958      27.137878       0.000000       0.320570   -9999.000000   -9999.000000   -9999.000000       0.362000
57496     57496     hubei          114.5197       30.2197          119       178     2012      09        26        270              0.283917      27.006897       0.256154       0.315668   -9999.000000   -9999.000000       0.097400   -9999.000000
57496     57496     hubei          114.5197       30.2197          119       178     2012      09        27        271              0.280571      26.533325       0.000000       0.315413   -9999.000000   -9999.000000       0.165000       0.545000
57496     57496     hubei          114.5197       30.2197          119       178     2012      09        28        272              0.268687      27.250946       0.000000       0.311914   -9999.000000   -9999.000000       0.156900   -9999.000000
57496     57496     hubei          114.5197       30.2197          119       178     2012      09        29        273              0.263000      23.540436       0.000000       0.306591   -9999.000000   -9999.000000       0.183100       0.470000
57496     57496     hubei          114.5197       30.2197          119       178     2012      09        30        274              0.258292      22.856140       0.000000       0.305466   -9999.000000   -9999.000000   -9999.000000       0.329000
57496     57496     hubei          114.5197       30.2197          119       178     2012      10        01        275              0.254167      21.901886       0.000000       0.307125   -9999.000000       0.108400   -9999.000000   -9999.000000
57496     57496     hubei          114.5197       30.2197          119       178     2012      10        02        276              0.249875      22.904510       0.000000       0.304989   -9999.000000   -9999.000000       0.053200       0.581000
57496     57496     hubei          114.5197       30.2197          119       178     2012      10        03        277              0.246917      23.689484       0.607114       0.303339   -9999.000000   -9999.000000       0.196500   -9999.000000
57496     57496     hubei          114.5197       30.2197          119       178     2012      10        04        278              0.245000      23.349365       0.356276       0.304858   -9999.000000   -9999.000000       0.188900       0.765000
57496     57496     hubei          114.5197       30.2197          119       178     2012      10        05        279              0.244583      24.542816       3.137041       0.304276   -9999.000000   -9999.000000   -9999.000000   -9999.000000
57496     57496     hubei          114.5197       30.2197          119       178     2012      10        06        280              0.246333      21.496918       0.346016       0.317225   -9999.000000   -9999.000000   -9999.000000   -9999.000000
57496     57496     hubei          114.5197       30.2197          119       178     2012      10        07        281              0.247000      24.331390       0.245305       0.312345   -9999.000000   -9999.000000       0.201100       0.693000
57496     57496     hubei          114.5197       30.2197          119       178     2012      10        08        282              0.246500      22.918335       1.756830       0.312825   -9999.000000   -9999.000000       0.141300   -9999.000000
57496     57496     hubei          114.5197       30.2197          119       178     2012      10        09        283              0.244792      23.993011       0.171544       0.310668   -9999.000000   -9999.000000       0.171300       0.841000
57496     57496     hubei          114.5197       30.2197          119       178     2012      10        10        284              0.242958      24.246460       0.301121       0.307213   -9999.000000   -9999.000000       0.161300   -9999.000000
57496     57496     hubei          114.5197       30.2197          119       178     2012      10        11        285              0.240958      23.822449       0.564435       0.303643   -9999.000000   -9999.000000   -9999.000000   -9999.000000
57496     57496     hubei          114.5197       30.2197          119       178     2012      10        12        286              0.239250      22.689484       0.000000       0.302617   -9999.000000   -9999.000000   -9999.000000       0.087000
57496     57496     hubei          114.5197       30.2197          119       178     2012      10        13        287              0.238208      22.053497       0.132925       0.303334   -9999.000000   -9999.000000       0.076000   -9999.000000
57496     57496     hubei          114.5197       30.2197          119       178     2012      10        14        288              0.238208      21.130127       3.846919       0.304886   -9999.000000   -9999.000000       0.192900       0.512000
57496     57496     hubei          114.5197       30.2197          119       178     2012      10        15        289              0.244500      21.753906       8.434062       0.310020   -9999.000000   -9999.000000       0.167400   -9999.000000
57496     57496     hubei          114.5197       30.2197          119       178     2012      10        16        290              0.281667      21.934662      16.760294       0.333314       0.312000   -9999.000000       0.206800       0.858000
57496     57496     hubei          114.5197       30.2197          119       178     2012      10        17        291              0.278292      19.393127       0.315781       0.362273   -9999.000000   -9999.000000   -9999.000000       0.851000
57496     57496     hubei          114.5197       30.2197          119       178     2012      10        18        292              0.272583      19.138275       0.000000       0.337035   -9999.000000   -9999.000000   -9999.000000   -9999.000000
57496     57496     hubei          114.5197       30.2197          119       178     2012      10        19        293              0.269261      20.179718       0.000000       0.328798   -9999.000000   -9999.000000       0.073300       0.613000
57496     57496     hubei          114.5197       30.2197          119       178     2012      10        20        294              0.279500      20.839355       9.155744       0.325089   -9999.000000   -9999.000000       0.196200   -9999.000000
57496     57496     hubei          114.5197       30.2197          119       178     2012      10        21        295              0.318208      22.897888      32.093941       0.336273   -9999.000000   -9999.000000       0.190700       0.743000
57496     57496     hubei          114.5197       30.2197          119       178     2012      10        22        296              0.317583      23.194916       0.038627       0.367823   -9999.000000   -9999.000000   -9999.000000   -9999.000000
57496     57496     hubei          114.5197       30.2197          119       178     2012      10        23        297              0.314292      17.361786       0.239531       0.358847   -9999.000000   -9999.000000   -9999.000000   -9999.000000
57496     57496     hubei          114.5197       30.2197          119       178     2012      10        24        298              0.312875      18.764526       1.965448       0.343862   -9999.000000   -9999.000000       0.171300       0.748000
57496     57496     hubei          114.5197       30.2197          119       178     2012      10        25        299              0.000000      17.094971       8.521359       0.343724   -9999.000000   -9999.000000       0.151900   -9999.000000
57496     57496     hubei          114.5197       30.2197          119       178     2012      10        26        300              0.327958      18.250977      11.312136       0.353780   -9999.000000   -9999.000000       0.188900       0.751000
57496     57496     hubei          114.5197       30.2197          119       178     2012      10        27        301              0.328042      18.807281       0.174256       0.361622   -9999.000000   -9999.000000       0.173300   -9999.000000
57496     57496     hubei          114.5197       30.2197          119       178     2012      10        28        302              0.000000      20.097198      10.088688       0.346953   -9999.000000   -9999.000000   -9999.000000       0.994000
57496     57496     hubei          114.5197       30.2197          119       178     2012      10        29        303              0.344958      21.067413      25.973318       0.346775   -9999.000000   -9999.000000   -9999.000000       1.000000
57496     57496     hubei          114.5197       30.2197          119       178     2012      10        30        304              0.338958      17.842346       0.000000       0.382169   -9999.000000   -9999.000000       0.028900   -9999.000000
57496     57496     hubei          114.5197       30.2197          119       178     2012      10        31        305              0.325375      18.065338       0.218969       0.353638   -9999.000000   -9999.000000       0.205700       0.857000
57496     57496     hubei          114.5197       30.2197          119       178     2012      11        01        306              0.322292      17.643951       0.000000       0.344018   -9999.000000   -9999.000000       0.173400   -9999.000000
57496     57496     hubei          114.5197       30.2197          119       178     2012      11        02        307              0.320958      16.955627       0.191387       0.339394   -9999.000000   -9999.000000       0.202100       0.708000
57496     57496     hubei          114.5197       30.2197          119       178     2012      11        03        308              0.323417      18.270447       6.675111       0.335583   -9999.000000   -9999.000000   -9999.000000   -9999.000000
57496     57496     hubei          114.5197       30.2197          119       178     2012      11        04        309              0.322130      14.272125       0.000000       0.349292   -9999.000000   -9999.000000   -9999.000000   -9999.000000
57496     57496     hubei          114.5197       30.2197          119       178     2012      11        05        310              0.319750      14.887604       0.000000       0.339507   -9999.000000   -9999.000000       0.101900       0.596000
57496     57496     hubei          114.5197       30.2197          119       178     2012      11        06        311              0.318333      14.084503       0.000000       0.335925   -9999.000000   -9999.000000       0.184100   -9999.000000
57496     57496     hubei          114.5197       30.2197          119       178     2012      11        07        312              0.317625      14.467865       0.000000       0.333558   -9999.000000   -9999.000000       0.183400       0.880000
57496     57496     hubei          114.5197       30.2197          119       178     2012      11        08        313              0.319417      15.068420       2.499810       0.333484   -9999.000000   -9999.000000   -9999.000000   -9999.000000
57496     57496     hubei          114.5197       30.2197          119       178     2012      11        09        314              0.321250      13.621552       2.441449       0.340684   -9999.000000   -9999.000000   -9999.000000   -9999.000000
57496     57496     hubei          114.5197       30.2197          119       178     2012      11        10        315              0.321333      13.186707       0.676964       0.343381   -9999.000000   -9999.000000       0.123500       1.000000
57496     57496     hubei          114.5197       30.2197          119       178     2012      11        11        316              0.319792      12.684143       0.000000       0.338832   -9999.000000   -9999.000000       0.165900   -9999.000000
57496     57496     hubei          114.5197       30.2197          119       178     2012      11        12        317              0.318333      13.012512       0.000000       0.334686   -9999.000000   -9999.000000       0.150400       0.683000
57496     57496     hubei          114.5197       30.2197          119       178     2012      11        13        318              0.000000      14.041473       0.182553       0.333164   -9999.000000   -9999.000000       0.181800   -9999.000000
57496     57496     hubei          114.5197       30.2197          119       178     2012      11        14        319              0.318167      16.149780       0.915621       0.332144   -9999.000000   -9999.000000   -9999.000000       0.757000
57496     57496     hubei          114.5197       30.2197          119       178     2012      11        15        320              0.320583      16.131866       5.122107       0.331657   -9999.000000   -9999.000000   -9999.000000       0.972000
57496     57496     hubei          114.5197       30.2197          119       178     2012      11        16        321              0.324667      12.440491       4.088926       0.344728   -9999.000000   -9999.000000       0.034800   -9999.000000
57496     57496     hubei          114.5197       30.2197          119       178     2012      11        17        322              0.000000      10.872681       0.000000       0.348443   -9999.000000   -9999.000000       0.195500       0.550000
57496     57496     hubei          114.5197       30.2197          119       178     2012      11        18        323              0.320250      12.859131       1.010447       0.339481   -9999.000000   -9999.000000       0.179200   -9999.000000
57496     57496     hubei          114.5197       30.2197          119       178     2012      11        19        324              0.319292      14.478790       0.075844       0.336064   -9999.000000   -9999.000000   -9999.000000       0.591000
57496     57496     hubei          114.5197       30.2197          119       178     2012      11        20        325              0.323625      14.825836       8.473703       0.334134   -9999.000000   -9999.000000   -9999.000000   -9999.000000
57496     57496     hubei          114.5197       30.2197          119       178     2012      11        21        326              0.329958      14.579132       0.574544       0.347930   -9999.000000   -9999.000000       0.190000   -9999.000000
57496     57496     hubei          114.5197       30.2197          119       178     2012      11        22        327              0.336917      12.608398      17.157776       0.345522   -9999.000000   -9999.000000       0.164000       0.764000
57496     57496     hubei          114.5197       30.2197          119       178     2012      11        23        328              0.342208      11.988373       0.000000       0.368375   -9999.000000   -9999.000000       0.185900   -9999.000000
57496     57496     hubei          114.5197       30.2197          119       178     2012      11        24        329              0.331458      10.399750       3.505561       0.352178   -9999.000000   -9999.000000       0.193600       0.748000
57496     57496     hubei          114.5197       30.2197          119       178     2012      11        25        330              0.340542      11.455627       3.065327       0.350074   -9999.000000   -9999.000000   -9999.000000   -9999.000000
57496     57496     hubei          114.5197       30.2197          119       178     2012      11        26        331              0.326792       9.628845       0.000000       0.353804   -9999.000000   -9999.000000   -9999.000000       0.724000
57496     57496     hubei          114.5197       30.2197          119       178     2012      11        27        332              0.322667      10.528046       0.477298       0.344580   -9999.000000   -9999.000000       0.084000       0.774000
57496     57496     hubei          114.5197       30.2197          119       178     2012      11        28        333              0.321542      11.029694       0.000000       0.342723   -9999.000000   -9999.000000       0.194900   -9999.000000
57496     57496     hubei          114.5197       30.2197          119       178     2012      11        29        334              0.321250      11.847473       1.341126       0.341297   -9999.000000   -9999.000000       0.178900       0.791000
57496     57496     hubei          114.5197       30.2197          119       178     2012      11        30        335              0.320875      12.414307       0.102284       0.342324   -9999.000000   -9999.000000       0.193000   -9999.000000
57496     57496     hubei          114.5197       30.2197          119       178     2012      12        01        336              0.323667      12.078827       6.376241       0.341204   -9999.000000   -9999.000000   -9999.000000       1.000000
57496     57496     hubei          114.5197       30.2197          119       178     2012      12        02        337              0.322208       9.091797       0.000000       0.352967   -9999.000000   -9999.000000   -9999.000000   -9999.000000
57496     57496     hubei          114.5197       30.2197          119       178     2012      12        03        338              0.320542       7.441681       0.000000       0.345533   -9999.000000   -9999.000000       0.057600   -9999.000000
57496     57496     hubei          114.5197       30.2197          119       178     2012      12        04        339              0.318917       9.905121       0.000000       0.341938   -9999.000000   -9999.000000       0.173500       0.986000
57496     57496     hubei          114.5197       30.2197          119       178     2012      12        05        340              0.318458       8.628052       0.000000       0.340744   -9999.000000   -9999.000000       0.167600   -9999.000000
57496     57496     hubei          114.5197       30.2197          119       178     2012      12        06        341              0.317417      10.278717       0.000000       0.338774   -9999.000000   -9999.000000   -9999.000000       0.612000
57496     57496     hubei          114.5197       30.2197          119       178     2012      12        07        342              0.316875      10.406891       0.097011       0.338049   -9999.000000   -9999.000000   -9999.000000   -9999.000000
57496     57496     hubei          114.5197       30.2197          119       178     2012      12        08        343              0.316458      11.233124       0.000000       0.336805   -9999.000000   -9999.000000       0.165400   -9999.000000
57496     57496     hubei          114.5197       30.2197          119       178     2012      12        09        344              0.315458      10.339020       0.995417       0.335079   -9999.000000   -9999.000000       0.158800       1.000000
57496     57496     hubei          114.5197       30.2197          119       178     2012      12        10        345              0.314750       8.778107       0.869297       0.336295   -9999.000000   -9999.000000       0.171100   -9999.000000
57496     57496     hubei          114.5197       30.2197          119       178     2012      12        11        346              0.314583       6.883606       0.000000       0.337732   -9999.000000   -9999.000000       0.161700       0.454000
57496     57496     hubei          114.5197       30.2197          119       178     2012      12        12        347              0.314292       8.411102       0.116545       0.336189   -9999.000000   -9999.000000   -9999.000000   -9999.000000
57496     57496     hubei          114.5197       30.2197          119       178     2012      12        13        348              0.314125       9.203125       7.688979       0.335182   -9999.000000   -9999.000000   -9999.000000       0.850000
57496     57496     hubei          114.5197       30.2197          119       178     2012      12        14        349              0.323500       9.140076      16.882206       0.351595   -9999.000000   -9999.000000       0.032000       1.000000
57496     57496     hubei          114.5197       30.2197          119       178     2012      12        15        350              0.000000       6.276825       1.366547       0.365149   -9999.000000   -9999.000000       0.185800   -9999.000000
57496     57496     hubei          114.5197       30.2197          119       178     2012      12        16        351              0.342083       7.071442       0.000000       0.357425   -9999.000000   -9999.000000       0.144700       0.667000
57496     57496     hubei          114.5197       30.2197          119       178     2012      12        17        352              0.343792       7.133392      16.289255       0.349672   -9999.000000   -9999.000000       0.177000   -9999.000000
57496     57496     hubei          114.5197       30.2197          119       178     2012      12        18        353              0.351792       6.388672       0.000000       0.367708   -9999.000000   -9999.000000   -9999.000000       0.815000
57496     57496     hubei          114.5197       30.2197          119       178     2012      12        19        354              0.341958       6.360077       0.187728       0.355584   -9999.000000   -9999.000000   -9999.000000   -9999.000000
57496     57496     hubei          114.5197       30.2197          119       178     2012      12        20        355              0.000000       5.985077       3.344801       0.349624   -9999.000000   -9999.000000       0.102300   -9999.000000
57496     57496     hubei          114.5197       30.2197          119       178     2012      12        21        356              0.337792       3.833527       0.000000       0.354631   -9999.000000   -9999.000000       0.177300       0.480000
57496     57496     hubei          114.5197       30.2197          119       178     2012      12        22        357              0.326333       4.130341       0.000000       0.350064   -9999.000000   -9999.000000       0.154100   -9999.000000
57496     57496     hubei          114.5197       30.2197          119       178     2012      12        23        358              0.320208       3.363220       0.172220       0.346906   -9999.000000   -9999.000000   -9999.000000       0.359000
57496     57496     hubei          114.5197       30.2197          119       178     2012      12        24        359              0.318278       3.628143       0.439206       0.343099   -9999.000000   -9999.000000   -9999.000000   -9999.000000
57496     57496     hubei          114.5197       30.2197          119       178     2012      12        25        360              0.317708       5.671082       0.530256       0.345573   -9999.000000   -9999.000000       0.126100       0.565000
57496     57496     hubei          114.5197       30.2197          119       178     2012      12        26        361              0.000000       4.104675       1.321041       0.345160   -9999.000000   -9999.000000       0.164800       0.624000
57496     57496     hubei          114.5197       30.2197          119       178     2012      12        27        362              0.326667       2.194824       2.209070       0.344772   -9999.000000   -9999.000000       0.187200   -9999.000000
57496     57496     hubei          114.5197       30.2197          119       178     2012      12        28        363              0.323000       1.992218      10.875541       0.347019   -9999.000000   -9999.000000       0.178000       0.769000
57496     57496     hubei          114.5197       30.2197          119       178     2012      12        29        364              0.000000       3.167328       4.919068       0.353393   -9999.000000   -9999.000000   -9999.000000   -9999.000000
57496     57496     hubei          114.5197       30.2197          119       178     2012      12        30        365              0.000000       1.660950       0.815072       0.351906   -9999.000000   -9999.000000   -9999.000000       0.749000
57496     57496     hubei          114.5197       30.2197          119       178     2012      12        31        366              0.320933       2.610229       0.000000       0.332422   -9999.000000   -9999.000000       0.028800   -9999.000000
