# Supplementary material for: Research on Fusing Multisatellite Soil Moisture Data Based on Bayesian Model Averaging
Source: Hindawi journal article supplement (doi:10.1155/2018/9310838), 2018-06-25
Supplement: f1 [file 9310838.f1.zip › 2012_sm00-10cm_daily_ZDB_ZHY_57545_366days_allin.txt]

57545     57545     hubei          109.4206       29.5278          122       158     2012      01        01        001              0.000000   -9999.000000       0.000000   -9999.000000       0.089000   -9999.000000       0.071600   -9999.000000
57545     57545     hubei          109.4206       29.5278          122       158     2012      01        02        002              0.023458       4.471344       3.799592       0.277285       0.098000       0.388300   -9999.000000       0.038000
57545     57545     hubei          109.4206       29.5278          122       158     2012      01        03        003              0.000000       3.821075       2.296747       0.279226   -9999.000000   -9999.000000   -9999.000000   -9999.000000
57545     57545     hubei          109.4206       29.5278          122       158     2012      01        04        004              0.027417       2.162292       0.595002       0.282057   -9999.000000   -9999.000000       0.053300       0.101000
57545     57545     hubei          109.4206       29.5278          122       158     2012      01        05        005              0.027708       1.710602       1.196943       0.271807   -9999.000000       0.072300       0.053500       0.014000
57545     57545     hubei          109.4206       29.5278          122       158     2012      01        06        006              0.025500       1.053711       1.027465       0.250757   -9999.000000   -9999.000000       0.054500   -9999.000000
57545     57545     hubei          109.4206       29.5278          122       158     2012      01        07        007              0.024167       2.102417       0.189805       0.261892   -9999.000000       0.202700   -9999.000000       0.073000
57545     57545     hubei          109.4206       29.5278          122       158     2012      01        08        008              0.000000       2.077545       0.425801       0.265447   -9999.000000   -9999.000000   -9999.000000   -9999.000000
57545     57545     hubei          109.4206       29.5278          122       158     2012      01        09        009              0.023958       2.378998       0.000000       0.267306   -9999.000000       0.176000   -9999.000000       0.182000
57545     57545     hubei          109.4206       29.5278          122       158     2012      01        10        010              0.024583       2.726227       1.969844       0.268170   -9999.000000       0.174100       0.049200   -9999.000000
57545     57545     hubei          109.4206       29.5278          122       158     2012      01        11        011              0.024250       2.397797       0.000000       0.268145   -9999.000000   -9999.000000       0.049900       0.055000
57545     57545     hubei          109.4206       29.5278          122       158     2012      01        12        012              0.023333       2.365967       0.000000       0.269844       0.078000       0.186200       0.048400       0.081000
57545     57545     hubei          109.4206       29.5278          122       158     2012      01        13        013              0.025250       2.389587       2.197175       0.267285       0.080000   -9999.000000   -9999.000000   -9999.000000
57545     57545     hubei          109.4206       29.5278          122       158     2012      01        14        014              0.029458       2.641815       5.921957       0.271802   -9999.000000   -9999.000000   -9999.000000       0.330000
57545     57545     hubei          109.4206       29.5278          122       158     2012      01        15        015              0.034167       2.734589       2.145890       0.283179   -9999.000000   -9999.000000       0.049300   -9999.000000
57545     57545     hubei          109.4206       29.5278          122       158     2012      01        16        016              0.028958       1.801910       0.312016       0.280969       0.076000   -9999.000000       0.044700       0.237000
57545     57545     hubei          109.4206       29.5278          122       158     2012      01        17        017              0.000000       2.312927       2.977593       0.272275   -9999.000000       0.252000       0.041800       0.287000
57545     57545     hubei          109.4206       29.5278          122       158     2012      01        18        018              0.031542       2.821259       3.351678       0.275881   -9999.000000   -9999.000000       0.044200   -9999.000000
57545     57545     hubei          109.4206       29.5278          122       158     2012      01        19        019              0.030667       2.791962       0.753762       0.280935   -9999.000000   -9999.000000   -9999.000000       0.358000
57545     57545     hubei          109.4206       29.5278          122       158     2012      01        20        020              0.028208       2.346954       1.346834       0.278722   -9999.000000   -9999.000000   -9999.000000   -9999.000000
57545     57545     hubei          109.4206       29.5278          122       158     2012      01        21        021              0.033750       2.249512       3.542470       0.272042   -9999.000000   -9999.000000       0.040100       0.362000
57545     57545     hubei          109.4206       29.5278          122       158     2012      01        22        022              0.033292       1.369934       3.529854       0.264648   -9999.000000   -9999.000000       0.041500   -9999.000000
57545     57545     hubei          109.4206       29.5278          122       158     2012      01        23        023              0.028417       0.719513       1.972887       0.232220   -9999.000000   -9999.000000       0.040200   -9999.000000
57545     57545     hubei          109.4206       29.5278          122       158     2012      01        24        024              0.027708       0.817505       0.405264       0.222469   -9999.000000   -9999.000000   -9999.000000       0.334000
57545     57545     hubei          109.4206       29.5278          122       158     2012      01        25        025              0.026958       0.909515       0.788923       0.222354   -9999.000000       0.193100   -9999.000000   -9999.000000
57545     57545     hubei          109.4206       29.5278          122       158     2012      01        26        026              0.026833       1.717560       0.361089       0.235090   -9999.000000   -9999.000000       0.038900       0.222000
57545     57545     hubei          109.4206       29.5278          122       158     2012      01        27        027              0.026500       1.781219       0.141175       0.243717       0.091000   -9999.000000       0.039800   -9999.000000
57545     57545     hubei          109.4206       29.5278          122       158     2012      01        28        028              0.026875       2.497101       0.225037       0.256122       0.083000       0.097000       0.039300       0.114000
57545     57545     hubei          109.4206       29.5278          122       158     2012      01        29        029              0.026167       3.168030       5.036093       0.264519       0.081000   -9999.000000       0.038800       0.272000
57545     57545     hubei          109.4206       29.5278          122       158     2012      01        30        030              0.026167       3.087860       0.000000       0.265311   -9999.000000       0.089700   -9999.000000   -9999.000000
57545     57545     hubei          109.4206       29.5278          122       158     2012      01        31        031              0.026167       3.275726       1.222090       0.266316   -9999.000000       0.243000   -9999.000000       0.111000
57545     57545     hubei          109.4206       29.5278          122       158     2012      02        01        032              0.025875       5.437256       0.180074       0.268412       0.087500       0.032400       0.052400   -9999.000000
57545     57545     hubei          109.4206       29.5278          122       158     2012      02        02        033              0.024375       4.692169       0.204241       0.269894   -9999.000000       0.125000       0.051400       0.148000
57545     57545     hubei          109.4206       29.5278          122       158     2012      02        03        034              0.024167       3.505005       0.041872       0.268654       0.083000   -9999.000000       0.050800       0.095000
57545     57545     hubei          109.4206       29.5278          122       158     2012      02        04        035              0.023417       4.877197       0.000000       0.268481   -9999.000000       0.065300       0.050800   -9999.000000
57545     57545     hubei          109.4206       29.5278          122       158     2012      02        05        036              0.025000       5.651276       0.265223       0.268656       0.090000       0.135400   -9999.000000       0.058000
57545     57545     hubei          109.4206       29.5278          122       158     2012      02        06        037              0.034667       4.960938       3.019639       0.269662       0.094000   -9999.000000   -9999.000000   -9999.000000
57545     57545     hubei          109.4206       29.5278          122       158     2012      02        07        038              0.029417       4.646088       0.000000       0.277246   -9999.000000       0.040700       0.037100       0.136000
57545     57545     hubei          109.4206       29.5278          122       158     2012      02        08        039              0.026125       3.323181       0.000000       0.268695   -9999.000000   -9999.000000       0.039800   -9999.000000
57545     57545     hubei          109.4206       29.5278          122       158     2012      02        09        040              0.024958       2.328583       0.000000       0.258948   -9999.000000       0.104400       0.039400   -9999.000000
57545     57545     hubei          109.4206       29.5278          122       158     2012      02        10        041              0.024375       1.554047       0.000000       0.246874   -9999.000000       0.184400   -9999.000000       0.130000
57545     57545     hubei          109.4206       29.5278          122       158     2012      02        11        042              0.023542       2.609253       0.000000       0.252381       0.098000   -9999.000000   -9999.000000   -9999.000000
57545     57545     hubei          109.4206       29.5278          122       158     2012      02        12        043              0.023583       2.997833       0.000000       0.259925       0.098000       0.145400   -9999.000000       0.216000
57545     57545     hubei          109.4206       29.5278          122       158     2012      02        13        044              0.025125       3.664124       0.159057       0.263519       0.098000   -9999.000000       0.061900   -9999.000000
57545     57545     hubei          109.4206       29.5278          122       158     2012      02        14        045              0.028750       3.411255       0.349926       0.265457   -9999.000000       0.009800       0.062400       0.235000
57545     57545     hubei          109.4206       29.5278          122       158     2012      02        15        046              0.029542       3.398010       0.080909       0.266239   -9999.000000   -9999.000000       0.060100       0.231000
57545     57545     hubei          109.4206       29.5278          122       158     2012      02        16        047              0.029833       3.381073       0.316477       0.265378       0.092000   -9999.000000   -9999.000000   -9999.000000
57545     57545     hubei          109.4206       29.5278          122       158     2012      02        17        048              0.026083       3.700806       0.000000       0.265852       0.096000       0.060100   -9999.000000       0.236000
57545     57545     hubei          109.4206       29.5278          122       158     2012      02        18        049              0.024208       4.887482       0.000000       0.263088   -9999.000000   -9999.000000       0.055200   -9999.000000
57545     57545     hubei          109.4206       29.5278          122       158     2012      02        19        050              0.024417       3.065399       0.970546       0.255840       0.093000       0.120100       0.059700       0.074000
57545     57545     hubei          109.4206       29.5278          122       158     2012      02        20        051              0.023696       6.205841       0.000000       0.259241   -9999.000000   -9999.000000       0.037200   -9999.000000
57545     57545     hubei          109.4206       29.5278          122       158     2012      02        21        052              0.023875       5.809570       0.382257       0.261582       0.073000   -9999.000000   -9999.000000   -9999.000000
57545     57545     hubei          109.4206       29.5278          122       158     2012      02        22        053              0.025417       5.735748       0.000000       0.262527       0.066000       0.382200   -9999.000000       0.264000
57545     57545     hubei          109.4206       29.5278          122       158     2012      02        23        054              0.024333       8.302155       0.850449       0.262748       0.068000       0.043400   -9999.000000   -9999.000000
57545     57545     hubei          109.4206       29.5278          122       158     2012      02        24        055              0.026542       7.440552       1.993733       0.264892       0.073000       0.133300       0.039400       0.304000
57545     57545     hubei          109.4206       29.5278          122       158     2012      02        25        056              0.027000       6.044617       1.209585       0.267886   -9999.000000   -9999.000000       0.038700   -9999.000000
57545     57545     hubei          109.4206       29.5278          122       158     2012      02        26        057              0.025958       3.750183       0.383610       0.269392   -9999.000000   -9999.000000       0.037400       0.129000
57545     57545     hubei          109.4206       29.5278          122       158     2012      02        27        058              0.027565       2.596680       1.848164       0.261483   -9999.000000   -9999.000000   -9999.000000       0.040000
57545     57545     hubei          109.4206       29.5278          122       158     2012      02        28        059              0.025542       2.252197       0.639439       0.262137       0.070000   -9999.000000   -9999.000000   -9999.000000
57545     57545     hubei          109.4206       29.5278          122       158     2012      02        29        060              0.000000   -9999.000000       0.530557   -9999.000000       0.067000   -9999.000000   -9999.000000   -9999.000000
57545     57545     hubei          109.4206       29.5278          122       158     2012      03        01        061              0.025250       3.445068       0.776610       0.263620   -9999.000000       0.162300       0.034900   -9999.000000
57545     57545     hubei          109.4206       29.5278          122       158     2012      03        02        062              0.025000       4.510376       0.614082       0.264414   -9999.000000   -9999.000000       0.036700       0.037000
57545     57545     hubei          109.4206       29.5278          122       158     2012      03        03        063              0.025208       4.156067       0.593544       0.263934       0.091000       0.157600       0.038900       0.163000
57545     57545     hubei          109.4206       29.5278          122       158     2012      03        04        064              0.025000       4.011200       0.223765       0.265116       0.093000       0.139100   -9999.000000   -9999.000000
57545     57545     hubei          109.4206       29.5278          122       158     2012      03        05        065              0.024565       3.964325       1.708254       0.263561       0.080000   -9999.000000   -9999.000000       0.019000
57545     57545     hubei          109.4206       29.5278          122       158     2012      03        06        066              0.028417       6.208496       2.255287       0.262434   -9999.000000       0.199200       0.038300   -9999.000000
57545     57545     hubei          109.4206       29.5278          122       158     2012      03        07        067              0.000000       5.262360       9.169725       0.267692   -9999.000000   -9999.000000       0.037000       0.343000
57545     57545     hubei          109.4206       29.5278          122       158     2012      03        08        068              0.043625       4.060974       4.507736       0.283694   -9999.000000       0.208600       0.038000   -9999.000000
57545     57545     hubei          109.4206       29.5278          122       158     2012      03        09        069              0.041667       3.762634       1.932326       0.287797       0.086000   -9999.000000       0.036700       0.285000
57545     57545     hubei          109.4206       29.5278          122       158     2012      03        10        070              0.036583       4.325653       2.691991       0.283054       0.081000   -9999.000000   -9999.000000       0.242000
57545     57545     hubei          109.4206       29.5278          122       158     2012      03        11        071              0.034708       5.976898       0.000000       0.273432       0.071000       0.220100   -9999.000000   -9999.000000
57545     57545     hubei          109.4206       29.5278          122       158     2012      03        12        072              0.033917       6.375580       0.000000       0.269285   -9999.000000       0.054000       0.043500       0.160000
57545     57545     hubei          109.4206       29.5278          122       158     2012      03        13        073              0.032696       6.635773       0.000000       0.266469       0.070000       0.199600       0.044400   -9999.000000
57545     57545     hubei          109.4206       29.5278          122       158     2012      03        14        074              0.031292      10.743713       0.000000       0.262645       0.073500       0.022900   -9999.000000       0.278000
57545     57545     hubei          109.4206       29.5278          122       158     2012      03        15        075              0.031333       8.996796       0.061086       0.262876       0.074000   -9999.000000   -9999.000000       0.168000
57545     57545     hubei          109.4206       29.5278          122       158     2012      03        16        076              0.033000       9.419586       0.162505       0.263135       0.066000       0.084700   -9999.000000   -9999.000000
57545     57545     hubei          109.4206       29.5278          122       158     2012      03        17        077              0.234000      11.109680       0.000000       0.262887   -9999.000000       0.173600       0.041400       0.345000
57545     57545     hubei          109.4206       29.5278          122       158     2012      03        18        078              0.298042      14.179810       0.126006       0.260230       0.068000   -9999.000000       0.044300   -9999.000000
57545     57545     hubei          109.4206       29.5278          122       158     2012      03        19        079              0.291435      16.117645       0.071871       0.257799       0.076500       0.161500       0.058700       0.334000
57545     57545     hubei          109.4206       29.5278          122       158     2012      03        20        080              0.286565      13.506927       0.223122       0.258710       0.078000   -9999.000000       0.058000   -9999.000000
57545     57545     hubei          109.4206       29.5278          122       158     2012      03        21        081              0.300167      10.979523      12.463271       0.258466       0.100000       0.163300   -9999.000000   -9999.000000
57545     57545     hubei          109.4206       29.5278          122       158     2012      03        22        082              0.354208       9.373444      26.256008       0.274873   -9999.000000       0.341400   -9999.000000       0.695000
57545     57545     hubei          109.4206       29.5278          122       158     2012      03        23        083              0.327792       8.905853       1.190940       0.312736   -9999.000000   -9999.000000       0.055700   -9999.000000
57545     57545     hubei          109.4206       29.5278          122       158     2012      03        24        084              0.308333      11.290710       0.000000       0.294782       0.082500       0.320500       0.053800       0.310000
57545     57545     hubei          109.4206       29.5278          122       158     2012      03        25        085              0.000000      13.580811       0.000000       0.277832       0.075000   -9999.000000       0.053600   -9999.000000
57545     57545     hubei          109.4206       29.5278          122       158     2012      03        26        086              0.282000      15.252045       0.000000       0.270144       0.077500       0.247200   -9999.000000   -9999.000000
57545     57545     hubei          109.4206       29.5278          122       158     2012      03        27        087              0.284000      16.189667       0.234045       0.265743       0.077000       0.093500   -9999.000000       0.309000
57545     57545     hubei          109.4206       29.5278          122       158     2012      03        28        088              0.333667      14.556152      10.393045       0.266519   -9999.000000   -9999.000000   -9999.000000   -9999.000000
57545     57545     hubei          109.4206       29.5278          122       158     2012      03        29        089              0.356792      13.153168      27.385078       0.290988   -9999.000000       0.323800       0.063100       0.816000
57545     57545     hubei          109.4206       29.5278          122       158     2012      03        30        090              0.358625      13.747284       8.843398       0.314724       0.088000       0.275300       0.063400   -9999.000000
57545     57545     hubei          109.4206       29.5278          122       158     2012      03        31        091              0.322708      12.303436       0.000000       0.309299       0.079500       0.270800       0.061200       0.347000
57545     57545     hubei          109.4206       29.5278          122       158     2012      04        01        092              0.297792      15.095947       0.000000       0.284663       0.078000       0.037400   -9999.000000       0.556000
57545     57545     hubei          109.4206       29.5278          122       158     2012      04        02        093              0.282917      16.824280       0.000000       0.277020   -9999.000000   -9999.000000   -9999.000000   -9999.000000
57545     57545     hubei          109.4206       29.5278          122       158     2012      04        03        094              0.270667      19.600342       5.207328       0.272976       0.086000       0.064200       0.052100       0.143000
57545     57545     hubei          109.4206       29.5278          122       158     2012      04        04        095              0.321750      14.896576      16.141993       0.277737       0.091000   -9999.000000       0.068100   -9999.000000
57545     57545     hubei          109.4206       29.5278          122       158     2012      04        05        096              0.311542      13.384705       0.054812       0.307512       0.082000   -9999.000000       0.065200       0.447000
57545     57545     hubei          109.4206       29.5278          122       158     2012      04        06        097              0.295792      15.195740       0.000000       0.284761       0.082000       0.131500       0.063500   -9999.000000
57545     57545     hubei          109.4206       29.5278          122       158     2012      04        07        098              0.290292      15.650024       0.045935       0.279144   -9999.000000   -9999.000000   -9999.000000       0.301000
57545     57545     hubei          109.4206       29.5278          122       158     2012      04        08        099              0.290708      14.418884       5.934440       0.278026       0.087000   -9999.000000   -9999.000000       0.236000
57545     57545     hubei          109.4206       29.5278          122       158     2012      04        09        100              0.324875      16.113983       1.073265       0.282450       0.096000       0.374900       0.052200   -9999.000000
57545     57545     hubei          109.4206       29.5278          122       158     2012      04        10        101              0.334417      14.476318      11.909408       0.288825       0.084500   -9999.000000       0.057100       0.744000
57545     57545     hubei          109.4206       29.5278          122       158     2012      04        11        102              0.317792      15.743774       3.356026       0.303031       0.105000       0.181100       0.057300   -9999.000000
57545     57545     hubei          109.4206       29.5278          122       158     2012      04        12        103              0.352750      16.473419      29.069838       0.288306   -9999.000000   -9999.000000   -9999.000000       0.970000
57545     57545     hubei          109.4206       29.5278          122       158     2012      04        13        104              0.338667      15.083618       4.449545       0.324059   -9999.000000       0.073600   -9999.000000       0.699000
57545     57545     hubei          109.4206       29.5278          122       158     2012      04        14        105              0.298958      13.534668       3.726168       0.301486       0.100500       0.186800       0.059600   -9999.000000
57545     57545     hubei          109.4206       29.5278          122       158     2012      04        15        106              0.293125      14.739716       0.070131       0.297174       0.100500   -9999.000000       0.056500       0.642000
57545     57545     hubei          109.4206       29.5278          122       158     2012      04        16        107              0.285792      15.235199       0.292538       0.293137       0.094500       0.148300       0.089500   -9999.000000
57545     57545     hubei          109.4206       29.5278          122       158     2012      04        17        108              0.289000      14.935699       3.896011       0.287902       0.100000       0.125800       0.092500       0.466000
57545     57545     hubei          109.4206       29.5278          122       158     2012      04        18        109              0.279875      14.250519       2.415596       0.291650   -9999.000000       0.126500   -9999.000000   -9999.000000
57545     57545     hubei          109.4206       29.5278          122       158     2012      04        19        110              0.283333      17.456238       1.277702       0.286507   -9999.000000       0.027800   -9999.000000   -9999.000000
57545     57545     hubei          109.4206       29.5278          122       158     2012      04        20        111              0.279833      17.929474       0.294878       0.285677       0.100500   -9999.000000       0.085700       0.506000
57545     57545     hubei          109.4206       29.5278          122       158     2012      04        21        112              0.263125      17.899292       0.000000       0.282114       0.142500       0.117900       0.086400   -9999.000000
57545     57545     hubei          109.4206       29.5278          122       158     2012      04        22        113              0.249958      19.950378       0.479583       0.276327       0.124000       0.256900   -9999.000000       0.468000
57545     57545     hubei          109.4206       29.5278          122       158     2012      04        23        114              0.250292      21.323120       1.867944       0.273260   -9999.000000   -9999.000000       0.119900   -9999.000000
57545     57545     hubei          109.4206       29.5278          122       158     2012      04        24        115              0.271583      19.113953       2.987671       0.280630   -9999.000000       0.205600   -9999.000000       0.496000
57545     57545     hubei          109.4206       29.5278          122       158     2012      04        25        116              0.000000      20.934875       2.283325       0.280996       0.148000   -9999.000000   -9999.000000       0.632000
57545     57545     hubei          109.4206       29.5278          122       158     2012      04        26        117              0.263375      17.884674       0.000000       0.284400       0.138500   -9999.000000       0.114100   -9999.000000
57545     57545     hubei          109.4206       29.5278          122       158     2012      04        27        118              0.250167      19.886047       0.000000       0.273823       0.120000   -9999.000000       0.109100       0.451000
57545     57545     hubei          109.4206       29.5278          122       158     2012      04        28        119              0.280417      21.100800      17.618677       0.270757   -9999.000000   -9999.000000       0.123900   -9999.000000
57545     57545     hubei          109.4206       29.5278          122       158     2012      04        29        120              0.282417      17.911072      19.383936       0.305926   -9999.000000       0.278600   -9999.000000       0.572000
57545     57545     hubei          109.4206       29.5278          122       158     2012      04        30        121              0.290625      19.487885       5.399707       0.298776       0.165000   -9999.000000   -9999.000000       0.950000
57545     57545     hubei          109.4206       29.5278          122       158     2012      05        01        122              0.290958      19.804260       5.116727       0.305479       0.169000       0.198800       0.086900   -9999.000000
57545     57545     hubei          109.4206       29.5278          122       158     2012      05        02        123              0.282500      19.002747       1.077923       0.296209       0.160000       0.172300       0.081500       0.515000
57545     57545     hubei          109.4206       29.5278          122       158     2012      05        03        124              0.294792      19.027710       4.544647       0.286008   -9999.000000   -9999.000000       0.085400   -9999.000000
57545     57545     hubei          109.4206       29.5278          122       158     2012      05        04        125              0.278458      18.804871       0.000000       0.292044   -9999.000000       0.341300       0.083000       0.597000
57545     57545     hubei          109.4206       29.5278          122       158     2012      05        05        126              0.263875      20.732819       0.000000       0.282701       0.139000   -9999.000000   -9999.000000   -9999.000000
57545     57545     hubei          109.4206       29.5278          122       158     2012      05        06        127              0.260583      22.736725       4.451391       0.277053       0.152500       0.141900   -9999.000000       0.530000
57545     57545     hubei          109.4206       29.5278          122       158     2012      05        07        128              0.269833      21.643860       1.084593       0.287016   -9999.000000       0.038000       0.097900       0.775000
57545     57545     hubei          109.4206       29.5278          122       158     2012      05        08        129              0.286792      23.307587      13.846006       0.282364       0.133000   -9999.000000       0.106500   -9999.000000
57545     57545     hubei          109.4206       29.5278          122       158     2012      05        09        130              0.292250      23.737091       1.856646       0.292933   -9999.000000       0.258500       0.105800       0.857000
57545     57545     hubei          109.4206       29.5278          122       158     2012      05        10        131              0.276292      21.845886       1.295007       0.296770       0.142000   -9999.000000       0.099100   -9999.000000
57545     57545     hubei          109.4206       29.5278          122       158     2012      05        11        132              0.298500      22.923431      27.764175       0.283593   -9999.000000   -9999.000000   -9999.000000       1.000000
57545     57545     hubei          109.4206       29.5278          122       158     2012      05        12        133              0.325583      21.923676      32.554531       0.313542       0.204000       0.278700   -9999.000000       1.000000
57545     57545     hubei          109.4206       29.5278          122       158     2012      05        13        134              0.324708      20.225708      18.601852       0.328000   -9999.000000   -9999.000000       0.111400   -9999.000000
57545     57545     hubei          109.4206       29.5278          122       158     2012      05        14        135              0.312500      18.821533       2.450548       0.320438   -9999.000000       0.285000       0.150000       1.000000
57545     57545     hubei          109.4206       29.5278          122       158     2012      05        15        136              0.301125      18.097351       0.886066       0.311169       0.166000       0.416200       0.148800   -9999.000000
57545     57545     hubei          109.4206       29.5278          122       158     2012      05        16        137              0.283333      19.075317       0.000000       0.300862       0.153500   -9999.000000   -9999.000000       0.522000
57545     57545     hubei          109.4206       29.5278          122       158     2012      05        17        138              0.264292      21.287048       0.636694       0.294304       0.152000       0.382400   -9999.000000   -9999.000000
57545     57545     hubei          109.4206       29.5278          122       158     2012      05        18        139              0.303375      22.045258       7.468028       0.290105       0.199000   -9999.000000       0.148700   -9999.000000
57545     57545     hubei          109.4206       29.5278          122       158     2012      05        19        140              0.285708      19.323853       0.566597       0.300512   -9999.000000       0.200300       0.143500       0.697000
57545     57545     hubei          109.4206       29.5278          122       158     2012      05        20        141              0.264583      23.619751       0.000000       0.285282   -9999.000000       0.272400       0.143400   -9999.000000
57545     57545     hubei          109.4206       29.5278          122       158     2012      05        21        142              0.294042      23.243195      28.773077       0.278718   -9999.000000   -9999.000000       0.077500       1.000000
57545     57545     hubei          109.4206       29.5278          122       158     2012      05        22        143              0.322542      21.218231      23.250502       0.309668       0.245000       0.404000   -9999.000000   -9999.000000
57545     57545     hubei          109.4206       29.5278          122       158     2012      05        23        144              0.328667      19.470856      21.420753       0.323509   -9999.000000   -9999.000000   -9999.000000       0.898000
57545     57545     hubei          109.4206       29.5278          122       158     2012      05        24        145              0.322625      18.640472       8.112120       0.323166       0.265000       0.263800       0.089400       1.000000
57545     57545     hubei          109.4206       29.5278          122       158     2012      05        25        146              0.000000      18.041718       0.232244       0.316571   -9999.000000   -9999.000000       0.087300   -9999.000000
57545     57545     hubei          109.4206       29.5278          122       158     2012      05        26        147              0.292750      18.344696       0.000000       0.304619       0.196000   -9999.000000       0.086200       0.427000
57545     57545     hubei          109.4206       29.5278          122       158     2012      05        27        148              0.283083      20.698608       0.000000       0.297153       0.199500       0.212900       0.087500   -9999.000000
57545     57545     hubei          109.4206       29.5278          122       158     2012      05        28        149              0.279458      21.618622       0.227507       0.293219       0.211000       0.147800   -9999.000000       0.561000
57545     57545     hubei          109.4206       29.5278          122       158     2012      05        29        150              0.315167      21.430145      28.328653       0.289586   -9999.000000       0.169700   -9999.000000       1.000000
57545     57545     hubei          109.4206       29.5278          122       158     2012      05        30        151              0.292208      20.181305       0.000000       0.321151   -9999.000000       0.193800       0.080000   -9999.000000
57545     57545     hubei          109.4206       29.5278          122       158     2012      05        31        152              0.287083      22.212616       1.985846       0.294455       0.202000   -9999.000000       0.086800   -9999.000000
57545     57545     hubei          109.4206       29.5278          122       158     2012      06        01        153              0.301542      20.518890       1.908903       0.293263       0.174000       0.414500       0.087800   -9999.000000
57545     57545     hubei          109.4206       29.5278          122       158     2012      06        02        154              0.284833      19.935669       1.639184       0.293805       0.159000       0.397600   -9999.000000       0.581000
57545     57545     hubei          109.4206       29.5278          122       158     2012      06        03        155              0.320458      22.039978      19.370995       0.285295   -9999.000000   -9999.000000   -9999.000000   -9999.000000
57545     57545     hubei          109.4206       29.5278          122       158     2012      06        04        156              0.316500      19.789276       4.438090       0.313704   -9999.000000       0.301400       0.065000       0.657000
57545     57545     hubei          109.4206       29.5278          122       158     2012      06        05        157              0.306167      19.964111       1.313577       0.301554       0.182000   -9999.000000       0.067800       0.865000
57545     57545     hubei          109.4206       29.5278          122       158     2012      06        06        158              0.314542      21.176880       3.387887       0.292220       0.170500       0.412900       0.067300   -9999.000000
57545     57545     hubei          109.4206       29.5278          122       158     2012      06        07        159              0.318083      21.431427      13.506759       0.294683       0.172000       0.124600       0.068700       1.000000
57545     57545     hubei          109.4206       29.5278          122       158     2012      06        08        160              0.300583      21.397278       0.070736       0.309516       0.155000   -9999.000000   -9999.000000   -9999.000000
57545     57545     hubei          109.4206       29.5278          122       158     2012      06        09        161              0.293167      24.233887       2.703010       0.289811   -9999.000000       0.258400   -9999.000000       0.519000
57545     57545     hubei          109.4206       29.5278          122       158     2012      06        10        162              0.360250      24.172272      11.681591       0.286025   -9999.000000       0.202900       0.061000       1.000000
57545     57545     hubei          109.4206       29.5278          122       158     2012      06        11        163              0.000000      22.881622       3.176029       0.303473       0.141500       0.258600       0.092700   -9999.000000
57545     57545     hubei          109.4206       29.5278          122       158     2012      06        12        164              0.316208      23.738434       0.000000       0.287160       0.147000       0.252600       0.092300       0.681000
57545     57545     hubei          109.4206       29.5278          122       158     2012      06        13        165              0.293833      25.160645       0.000000       0.280789       0.143000   -9999.000000       0.088800   -9999.000000
57545     57545     hubei          109.4206       29.5278          122       158     2012      06        14        166              0.294833      25.649261       0.432326       0.277846       0.143000       0.196200   -9999.000000       0.526000
57545     57545     hubei          109.4206       29.5278          122       158     2012      06        15        167              0.275917      24.237488       2.495118       0.278746   -9999.000000       0.293300   -9999.000000   -9999.000000
57545     57545     hubei          109.4206       29.5278          122       158     2012      06        16        168              0.260083      24.904175       0.000000       0.273995       0.129000       0.236400       0.086500   -9999.000000
57545     57545     hubei          109.4206       29.5278          122       158     2012      06        17        169              0.250708      24.972565       0.000000       0.271776       0.134500       0.175900       0.090400       0.532000
57545     57545     hubei          109.4206       29.5278          122       158     2012      06        18        170              0.244292      25.068207      16.634634       0.269564       0.139500   -9999.000000       0.121900   -9999.000000
57545     57545     hubei          109.4206       29.5278          122       158     2012      06        19        171              0.239250      25.567078       1.157441       0.268153       0.128000       0.163500   -9999.000000       0.541000
57545     57545     hubei          109.4206       29.5278          122       158     2012      06        20        172              0.235333      26.567108       0.000000       0.268480   -9999.000000       0.243000   -9999.000000   -9999.000000
57545     57545     hubei          109.4206       29.5278          122       158     2012      06        21        173              0.236500      26.866852       4.197572       0.265395       0.171000   -9999.000000       0.120700       0.742000
57545     57545     hubei          109.4206       29.5278          122       158     2012      06        22        174              0.232917      25.378662       0.000000       0.274729       0.166000       0.148600       0.120700       0.446000
57545     57545     hubei          109.4206       29.5278          122       158     2012      06        23        175              0.228333      26.285950       0.599173       0.267844       0.159500   -9999.000000       0.121800   -9999.000000
57545     57545     hubei          109.4206       29.5278          122       158     2012      06        24        176              0.226167      27.008331       0.547461       0.262006       0.161000       0.180600       0.116000       0.470000
57545     57545     hubei          109.4206       29.5278          122       158     2012      06        25        177              0.242458      27.371338      11.228057       0.258735   -9999.000000       0.231100   -9999.000000   -9999.000000
57545     57545     hubei          109.4206       29.5278          122       158     2012      06        26        178              0.281833      25.836639       5.966787       0.276048       0.191000   -9999.000000   -9999.000000       0.972000
57545     57545     hubei          109.4206       29.5278          122       158     2012      06        27        179              0.302000      25.353607       7.190182       0.288267   -9999.000000       0.315300       0.084900       0.955000
57545     57545     hubei          109.4206       29.5278          122       158     2012      06        28        180              0.302913      25.477570       5.651271       0.290241       0.208500       0.351100       0.082100   -9999.000000
57545     57545     hubei          109.4206       29.5278          122       158     2012      06        29        181              0.311208      25.210022       8.908251       0.289300       0.178500   -9999.000000       0.077500       1.000000
57545     57545     hubei          109.4206       29.5278          122       158     2012      06        30        182              0.292667      26.744263       0.070451       0.296418   -9999.000000   -9999.000000   -9999.000000   -9999.000000
57545     57545     hubei          109.4206       29.5278          122       158     2012      07        01        183              0.296318      28.433990       3.162852       0.277797   -9999.000000   -9999.000000   -9999.000000       0.730000
57545     57545     hubei          109.4206       29.5278          122       158     2012      07        02        184              0.276792      27.347656       0.000000       0.279609       0.153000       0.313100   -9999.000000   -9999.000000
57545     57545     hubei          109.4206       29.5278          122       158     2012      07        03        185              0.266875      27.731842       1.609944       0.268275       0.170000   -9999.000000       0.057200       0.528000
57545     57545     hubei          109.4206       29.5278          122       158     2012      07        04        186              0.259667      27.101288       1.401749       0.265011       0.164500       0.138700       0.054800       0.592000
57545     57545     hubei          109.4206       29.5278          122       158     2012      07        05        187              0.254833      27.408661       0.192578       0.263982   -9999.000000       0.148600       0.056600   -9999.000000
57545     57545     hubei          109.4206       29.5278          122       158     2012      07        06        188              0.250375      26.957672       0.488476       0.262765   -9999.000000   -9999.000000   -9999.000000       0.637000
57545     57545     hubei          109.4206       29.5278          122       158     2012      07        07        189              0.244333      27.881409       0.000000       0.258612   -9999.000000       0.222800   -9999.000000   -9999.000000
57545     57545     hubei          109.4206       29.5278          122       158     2012      07        08        190              0.240250      28.452118       0.000000       0.253843       0.154000       0.303200       0.055700       0.530000
57545     57545     hubei          109.4206       29.5278          122       158     2012      07        09        191              0.240083      28.053986       0.000000       0.250791       0.162000   -9999.000000       0.059100       0.631000
57545     57545     hubei          109.4206       29.5278          122       158     2012      07        10        192              0.238708      27.515228       1.064519       0.250212       0.156000       0.181100       0.057100   -9999.000000
57545     57545     hubei          109.4206       29.5278          122       158     2012      07        11        193              0.285417      27.955994      31.518440       0.248983   -9999.000000   -9999.000000       0.042000       1.000000
57545     57545     hubei          109.4206       29.5278          122       158     2012      07        12        194              0.309125      27.717499      15.800439       0.300922   -9999.000000       0.212600   -9999.000000   -9999.000000
57545     57545     hubei          109.4206       29.5278          122       158     2012      07        13        195              0.303739      26.418365      17.271450       0.308394       0.275000       0.248700   -9999.000000       0.993000
57545     57545     hubei          109.4206       29.5278          122       158     2012      07        14        196              0.288417      25.180450       0.207868       0.315492       0.244500   -9999.000000       0.057900   -9999.000000
57545     57545     hubei          109.4206       29.5278          122       158     2012      07        15        197              0.278417      26.725311       0.000000       0.285411       0.240500       0.295700       0.058800   -9999.000000
57545     57545     hubei          109.4206       29.5278          122       158     2012      07        16        198              0.274625      27.074524       0.219996       0.275301   -9999.000000   -9999.000000       0.107000       0.636000
57545     57545     hubei          109.4206       29.5278          122       158     2012      07        17        199              0.290042      25.626892      10.874142       0.273235   -9999.000000       0.210400   -9999.000000   -9999.000000
57545     57545     hubei          109.4206       29.5278          122       158     2012      07        18        200              0.301417      25.533569       7.478172       0.286430       0.279000       0.205100   -9999.000000       1.000000
57545     57545     hubei          109.4206       29.5278          122       158     2012      07        19        201              0.294625      25.071472       3.515210       0.298207       0.270500   -9999.000000       0.105100   -9999.000000
57545     57545     hubei          109.4206       29.5278          122       158     2012      07        20        202              0.280667      25.644836       1.041807       0.287583       0.244500       0.216300       0.101300       0.788000
57545     57545     hubei          109.4206       29.5278          122       158     2012      07        21        203              0.263318      28.049408       0.000000       0.279701       0.274000       0.280000       0.102000       0.589000
57545     57545     hubei          109.4206       29.5278          122       158     2012      07        22        204              0.265750      28.604187       2.724652       0.271716   -9999.000000       0.203400       0.090900   -9999.000000
57545     57545     hubei          109.4206       29.5278          122       158     2012      07        23        205              0.257542      28.730865       3.490296       0.273742       0.284000       0.179600   -9999.000000       0.595000
57545     57545     hubei          109.4206       29.5278          122       158     2012      07        24        206              0.250917      28.275238       1.244929       0.274532       0.289500   -9999.000000   -9999.000000   -9999.000000
57545     57545     hubei          109.4206       29.5278          122       158     2012      07        25        207              0.248542      28.327057       0.073266       0.272866       0.299000       0.204200       0.128600       0.595000
57545     57545     hubei          109.4206       29.5278          122       158     2012      07        26        208              0.258083      27.885468       0.647616       0.268568       0.263000   -9999.000000       0.131900       0.610000
57545     57545     hubei          109.4206       29.5278          122       158     2012      07        27        209              0.246667      28.636353       1.449836       0.264663   -9999.000000   -9999.000000       0.125200   -9999.000000
57545     57545     hubei          109.4206       29.5278          122       158     2012      07        28        210              0.238667      28.714905       5.656325       0.264509   -9999.000000       0.172800       0.124600       0.541000
57545     57545     hubei          109.4206       29.5278          122       158     2012      07        29        211              0.232875      28.374664       0.078703       0.273569       0.270500   -9999.000000   -9999.000000   -9999.000000
57545     57545     hubei          109.4206       29.5278          122       158     2012      07        30        212              0.228250      28.748779       0.146593       0.263918       0.287000       0.275200   -9999.000000       0.553000
57545     57545     hubei          109.4206       29.5278          122       158     2012      07        31        213              0.254167      29.304504      20.671976       0.257345       0.282000       0.103600       0.166800   -9999.000000
57545     57545     hubei          109.4206       29.5278          122       158     2012      08        01        214              0.282458      28.718781      14.256977       0.289382       0.212000   -9999.000000       0.168500       0.745000
57545     57545     hubei          109.4206       29.5278          122       158     2012      08        02        215              0.276458      28.339691       5.254700       0.300740   -9999.000000       0.223200       0.160700       0.551000
57545     57545     hubei          109.4206       29.5278          122       158     2012      08        03        216              0.256625      28.454926       0.000000       0.281473       0.226000       0.224400   -9999.000000   -9999.000000
57545     57545     hubei          109.4206       29.5278          122       158     2012      08        04        217              0.245042      28.683167       0.379109       0.268620       0.217000       0.376400   -9999.000000       0.551000
57545     57545     hubei          109.4206       29.5278          122       158     2012      08        05        218              0.267417      29.523041       5.363727       0.263172       0.256000       0.259700       0.167300   -9999.000000
57545     57545     hubei          109.4206       29.5278          122       158     2012      08        06        219              0.279167      27.824493       0.717756       0.271217       0.215000   -9999.000000       0.188400       0.527000
57545     57545     hubei          109.4206       29.5278          122       158     2012      08        07        220              0.257167      28.098541       1.483675       0.268100   -9999.000000       0.058400       0.177700       0.524000
57545     57545     hubei          109.4206       29.5278          122       158     2012      08        08        221              0.246000      28.791840       0.108375       0.259956       0.226000       0.067900       0.180200   -9999.000000
57545     57545     hubei          109.4206       29.5278          122       158     2012      08        09        222              0.257125      29.104523       0.628943       0.255299       0.229000   -9999.000000   -9999.000000       0.647000
57545     57545     hubei          109.4206       29.5278          122       158     2012      08        10        223              0.256292      29.204895       0.294889       0.252639       0.222000   -9999.000000   -9999.000000   -9999.000000
57545     57545     hubei          109.4206       29.5278          122       158     2012      08        11        224              0.241625      29.317047       0.303832       0.248880       0.243000   -9999.000000       0.183300       0.531000
57545     57545     hubei          109.4206       29.5278          122       158     2012      08        12        225              0.238583      29.618378       1.361377       0.245454       0.225000       0.051500       0.191800   -9999.000000
57545     57545     hubei          109.4206       29.5278          122       158     2012      08        13        226              0.254833      29.911682       1.332299       0.245353   -9999.000000       0.222800       0.179400   -9999.000000
57545     57545     hubei          109.4206       29.5278          122       158     2012      08        14        227              0.245750      29.852631      12.865326       0.246775       0.259000   -9999.000000       0.177200       0.530000
57545     57545     hubei          109.4206       29.5278          122       158     2012      08        15        228              0.237333      29.510132       0.897751       0.243054       0.258000       0.216300   -9999.000000   -9999.000000
57545     57545     hubei          109.4206       29.5278          122       158     2012      08        16        229              0.234292      29.806274       0.000000       0.240744       0.251500   -9999.000000   -9999.000000       0.447000
57545     57545     hubei          109.4206       29.5278          122       158     2012      08        17        230              0.232375      29.225006       0.000000       0.237184       0.246000       0.133500       0.178300   -9999.000000
57545     57545     hubei          109.4206       29.5278          122       158     2012      08        18        231              0.231375      29.504761       0.819287       0.231241   -9999.000000       0.193200       0.184600       0.482000
57545     57545     hubei          109.4206       29.5278          122       158     2012      08        19        232              0.227750      29.841522       0.000000       0.227684       0.249000   -9999.000000       0.174800       0.473000
57545     57545     hubei          109.4206       29.5278          122       158     2012      08        20        233              0.252375      29.903351      76.707428       0.223465       0.245000       0.179900   -9999.000000   -9999.000000
57545     57545     hubei          109.4206       29.5278          122       158     2012      08        21        234              0.295542      29.369080       6.883741       0.307969       0.249000   -9999.000000   -9999.000000       1.000000
57545     57545     hubei          109.4206       29.5278          122       158     2012      08        22        235              0.285250      25.492401       0.239212       0.329331       0.219000       0.128400       0.156600   -9999.000000
57545     57545     hubei          109.4206       29.5278          122       158     2012      08        23        236              0.275542      25.254028       2.137222       0.285117   -9999.000000       0.186100       0.164000       0.431000
57545     57545     hubei          109.4206       29.5278          122       158     2012      08        24        237              0.264958      24.400543       0.000000       0.274410   -9999.000000   -9999.000000       0.167500       0.484000
57545     57545     hubei          109.4206       29.5278          122       158     2012      08        25        238              0.000000      25.126831       0.000000       0.267482       0.207000       0.154000       0.158500   -9999.000000
57545     57545     hubei          109.4206       29.5278          122       158     2012      08        26        239              0.253583      26.187775       0.579892       0.262957       0.230000       0.082300   -9999.000000       0.258000
57545     57545     hubei          109.4206       29.5278          122       158     2012      08        27        240              0.249458      25.565155      36.207718       0.263651       0.225000       0.140000   -9999.000000   -9999.000000
57545     57545     hubei          109.4206       29.5278          122       158     2012      08        28        241              0.246500      26.508575       0.204679       0.259492       0.205000       0.148000       0.151800       0.483000
57545     57545     hubei          109.4206       29.5278          122       158     2012      08        29        242              0.242708      26.612305       0.686794       0.257737   -9999.000000   -9999.000000       0.153400   -9999.000000
57545     57545     hubei          109.4206       29.5278          122       158     2012      08        30        243              0.283542      27.667084      14.877236       0.255958       0.236000       0.251100       0.159300       0.946000
57545     57545     hubei          109.4206       29.5278          122       158     2012      08        31        244              0.284083      25.896484       6.770156       0.293017       0.245500       0.222200   -9999.000000       0.512000
57545     57545     hubei          109.4206       29.5278          122       158     2012      09        01        245              0.302125      26.139343      24.533133       0.281514       0.211500   -9999.000000   -9999.000000   -9999.000000
57545     57545     hubei          109.4206       29.5278          122       158     2012      09        02        246              0.306125      26.531250       8.101812       0.304389       0.229000       0.221500   -9999.000000       0.654000
57545     57545     hubei          109.4206       29.5278          122       158     2012      09        03        247              0.294792      25.109863       0.260377       0.306983   -9999.000000   -9999.000000       0.126100   -9999.000000
57545     57545     hubei          109.4206       29.5278          122       158     2012      09        04        248              0.287542      25.376038       0.000000       0.283425       0.220000       0.204500       0.130300       0.356000
57545     57545     hubei          109.4206       29.5278          122       158     2012      09        05        249              0.281958      24.266571       0.321026       0.274423       0.203000       0.343600       0.127300       0.547000
57545     57545     hubei          109.4206       29.5278          122       158     2012      09        06        250              0.273875      24.288513       0.000000       0.269315       0.211500   -9999.000000   -9999.000000   -9999.000000
57545     57545     hubei          109.4206       29.5278          122       158     2012      09        07        251              0.249792      25.397217       0.000000       0.266438       0.214500       0.171000   -9999.000000       0.532000
57545     57545     hubei          109.4206       29.5278          122       158     2012      09        08        252              0.244542      26.500763       5.538404       0.264560       0.198000   -9999.000000       0.135000   -9999.000000
57545     57545     hubei          109.4206       29.5278          122       158     2012      09        09        253              0.261292      26.958405       1.956650       0.271100   -9999.000000       0.196200       0.139300       0.551000
57545     57545     hubei          109.4206       29.5278          122       158     2012      09        10        254              0.260250      25.013977       0.901336       0.278511       0.265000       0.123400       0.128400   -9999.000000
57545     57545     hubei          109.4206       29.5278          122       158     2012      09        11        255              0.280542      23.649841     104.584961       0.275115       0.218000   -9999.000000       0.126500   -9999.000000
57545     57545     hubei          109.4206       29.5278          122       158     2012      09        12        256              0.307208      23.779663      61.294701       0.318640   -9999.000000       0.141200   -9999.000000       1.000000
57545     57545     hubei          109.4206       29.5278          122       158     2012      09        13        257              0.272333      21.353516       0.328552       0.547639       0.176000       0.058600   -9999.000000   -9999.000000
57545     57545     hubei          109.4206       29.5278          122       158     2012      09        14        258              0.254042      22.127991       0.000000       0.436284   -9999.000000       0.108500       0.125200       0.436000
57545     57545     hubei          109.4206       29.5278          122       158     2012      09        15        259              0.241917      22.422882       0.000000       0.330086       0.185000       0.364300       0.125500   -9999.000000
57545     57545     hubei          109.4206       29.5278          122       158     2012      09        16        260              0.240250      21.704926       0.334052       0.309094       0.196500   -9999.000000       0.130000       0.484000
57545     57545     hubei          109.4206       29.5278          122       158     2012      09        17        261              0.235458      20.490845       0.000000       0.299488       0.189000       0.108200   -9999.000000       0.522000
57545     57545     hubei          109.4206       29.5278          122       158     2012      09        18        262              0.230708      21.199554       0.000000       0.293886       0.181500   -9999.000000   -9999.000000   -9999.000000
57545     57545     hubei          109.4206       29.5278          122       158     2012      09        19        263              0.226875      21.960602       0.000000       0.288830   -9999.000000   -9999.000000       0.148000       0.340000
57545     57545     hubei          109.4206       29.5278          122       158     2012      09        20        264              0.248208      23.111053      12.360242       0.282997   -9999.000000       0.247200       0.157000   -9999.000000
57545     57545     hubei          109.4206       29.5278          122       158     2012      09        21        265              0.273042      22.174347       1.292126       0.296478   -9999.000000   -9999.000000       0.154700       0.808000
57545     57545     hubei          109.4206       29.5278          122       158     2012      09        22        266              0.267417      21.365173       1.323626       0.293100       0.172000       0.286300       0.151500       0.702000
57545     57545     hubei          109.4206       29.5278          122       158     2012      09        23        267              0.275333      22.446320       4.205618       0.285399       0.171500       0.482700   -9999.000000   -9999.000000
57545     57545     hubei          109.4206       29.5278          122       158     2012      09        24        268              0.266375      21.812195       0.000000       0.289932       0.160000   -9999.000000   -9999.000000       0.462000
57545     57545     hubei          109.4206       29.5278          122       158     2012      09        25        269              0.264292      22.097839       1.168954       0.283248   -9999.000000       0.224400       0.112700   -9999.000000
57545     57545     hubei          109.4206       29.5278          122       158     2012      09        26        270              0.275042      21.294922       2.430997       0.282266       0.169000   -9999.000000       0.110000       0.824000
57545     57545     hubei          109.4206       29.5278          122       158     2012      09        27        271              0.270500      20.987946       0.000000       0.286647       0.160500       0.223800       0.106800   -9999.000000
57545     57545     hubei          109.4206       29.5278          122       158     2012      09        28        272              0.256563      21.825836       0.000000       0.280789       0.160500   -9999.000000       0.105500       0.518000
57545     57545     hubei          109.4206       29.5278          122       158     2012      09        29        273              0.249542      22.208801       0.375522       0.276811       0.145000   -9999.000000   -9999.000000       0.318000
57545     57545     hubei          109.4206       29.5278          122       158     2012      09        30        274              0.246750      21.410614       1.199099       0.274414   -9999.000000   -9999.000000   -9999.000000   -9999.000000
57545     57545     hubei          109.4206       29.5278          122       158     2012      10        01        275              0.240125      20.167175       0.906483       0.274765   -9999.000000   -9999.000000       0.151400       0.388000
57545     57545     hubei          109.4206       29.5278          122       158     2012      10        02        276              0.238708      21.075043       1.222804       0.271689       0.156500       0.246600       0.171200   -9999.000000
57545     57545     hubei          109.4206       29.5278          122       158     2012      10        03        277              0.255292      19.695038       2.173194       0.274058       0.143000       0.243100       0.163900       0.492000
57545     57545     hubei          109.4206       29.5278          122       158     2012      10        04        278              0.276500      18.305145      13.808459       0.279594       0.173000   -9999.000000   -9999.000000       0.765000
57545     57545     hubei          109.4206       29.5278          122       158     2012      10        05        279              0.290542      17.408356       6.524228       0.301347       0.168000       0.248700   -9999.000000   -9999.000000
57545     57545     hubei          109.4206       29.5278          122       158     2012      10        06        280              0.281875      17.386658       1.064595       0.298171   -9999.000000       0.377200       0.177200       0.664000
57545     57545     hubei          109.4206       29.5278          122       158     2012      10        07        281              0.294875      17.798492       9.396414       0.286164       0.177000   -9999.000000       0.176000   -9999.000000
57545     57545     hubei          109.4206       29.5278          122       158     2012      10        08        282              0.297958      16.843811       4.240216       0.295267       0.173500       0.348000       0.072300       0.842000
57545     57545     hubei          109.4206       29.5278          122       158     2012      10        09        283              0.280917      16.928497       0.000000       0.295998       0.148500   -9999.000000       0.070400   -9999.000000
57545     57545     hubei          109.4206       29.5278          122       158     2012      10        10        284              0.276500      18.549713       0.000000       0.283215       0.146000   -9999.000000   -9999.000000   -9999.000000
57545     57545     hubei          109.4206       29.5278          122       158     2012      10        11        285              0.275167      18.738983       0.133868       0.279049   -9999.000000       0.365800   -9999.000000       0.438000
57545     57545     hubei          109.4206       29.5278          122       158     2012      10        12        286              0.292667      17.916626      13.295438       0.278137   -9999.000000   -9999.000000       0.075200   -9999.000000
57545     57545     hubei          109.4206       29.5278          122       158     2012      10        13        287              0.288875      16.899048       0.981615       0.295887       0.116000       0.242100       0.074600       0.619000
57545     57545     hubei          109.4206       29.5278          122       158     2012      10        14        288              0.284375      17.238922       4.216814       0.293790       0.119000   -9999.000000       0.077700   -9999.000000
57545     57545     hubei          109.4206       29.5278          122       158     2012      10        15        289              0.295750      17.652039      25.049616       0.287472       0.133000       0.131500       0.177900       0.749000
57545     57545     hubei          109.4206       29.5278          122       158     2012      10        16        290              0.298000      17.104980       1.285883       0.305164   -9999.000000       0.158000   -9999.000000       1.000000
57545     57545     hubei          109.4206       29.5278          122       158     2012      10        17        291              0.283792      17.711670       0.738542       0.303254   -9999.000000   -9999.000000   -9999.000000   -9999.000000
57545     57545     hubei          109.4206       29.5278          122       158     2012      10        18        292              0.276000      18.026855       0.000000       0.287871       0.102000       0.347100       0.164100       0.310000
57545     57545     hubei          109.4206       29.5278          122       158     2012      10        19        293              0.272000      17.589508       2.026260       0.282827       0.112500   -9999.000000       0.167600   -9999.000000
57545     57545     hubei          109.4206       29.5278          122       158     2012      10        20        294              0.277750      16.839417       7.343861       0.281475       0.118500       0.241100       0.168000       0.343000
57545     57545     hubei          109.4206       29.5278          122       158     2012      10        21        295              0.286875      18.023010       0.198839       0.289632       0.206000       0.362400   -9999.000000       0.628000
57545     57545     hubei          109.4206       29.5278          122       158     2012      10        22        296              0.286083      18.883911       1.412595       0.289021   -9999.000000   -9999.000000   -9999.000000   -9999.000000
57545     57545     hubei          109.4206       29.5278          122       158     2012      10        23        297              0.285958      17.079956       4.322361       0.285928   -9999.000000       0.350300       0.074900       0.303000
57545     57545     hubei          109.4206       29.5278          122       158     2012      10        24        298              0.286917      16.286774       0.163844       0.286150   -9999.000000       0.423500       0.072100   -9999.000000
57545     57545     hubei          109.4206       29.5278          122       158     2012      10        25        299              0.000000      15.921234      19.345978       0.286231       0.230000       0.300100       0.079200       0.644000
57545     57545     hubei          109.4206       29.5278          122       158     2012      10        26        300              0.300458      15.517426       4.647277       0.306907       0.198000       0.130700       0.071600   -9999.000000
57545     57545     hubei          109.4206       29.5278          122       158     2012      10        27        301              0.290292      16.651001       0.000000       0.302682   -9999.000000   -9999.000000   -9999.000000       0.464000
57545     57545     hubei          109.4206       29.5278          122       158     2012      10        28        302              0.000000      16.713348       1.993288       0.288371   -9999.000000       0.213000   -9999.000000       0.459000
57545     57545     hubei          109.4206       29.5278          122       158     2012      10        29        303              0.303083      18.349518       4.308163       0.286286       0.232000       0.190900       0.105300   -9999.000000
57545     57545     hubei          109.4206       29.5278          122       158     2012      10        30        304              0.288917      17.016388       0.044317       0.293562       0.202000   -9999.000000       0.107200       0.624000
57545     57545     hubei          109.4206       29.5278          122       158     2012      10        31        305              0.286542      16.894745       0.000000       0.285347       0.190500       0.319600       0.106200   -9999.000000
57545     57545     hubei          109.4206       29.5278          122       158     2012      11        01        306              0.283625      16.772614       0.489206       0.281318       0.117000   -9999.000000   -9999.000000       0.305000
57545     57545     hubei          109.4206       29.5278          122       158     2012      11        02        307              0.284125      16.108643       7.129053       0.280861   -9999.000000       0.128800   -9999.000000       0.449000
57545     57545     hubei          109.4206       29.5278          122       158     2012      11        03        308              0.296750      17.140198       0.099963       0.285112       0.134000       0.254600   -9999.000000   -9999.000000
57545     57545     hubei          109.4206       29.5278          122       158     2012      11        04        309              0.288913      15.772247       1.933789       0.290003       0.120000   -9999.000000       0.106300       0.379000
57545     57545     hubei          109.4206       29.5278          122       158     2012      11        05        310              0.306250      15.523926       4.933204       0.281947       0.134000       0.337300       0.057100   -9999.000000
57545     57545     hubei          109.4206       29.5278          122       158     2012      11        06        311              0.296042      14.632233       0.863846       0.289925       0.125000       0.150900       0.056700       0.406000
57545     57545     hubei          109.4206       29.5278          122       158     2012      11        07        312              0.301042      14.787476       2.475022       0.285055   -9999.000000       0.081400   -9999.000000   -9999.000000
57545     57545     hubei          109.4206       29.5278          122       158     2012      11        08        313              0.299583      13.400391       1.558455       0.286178   -9999.000000       0.255100   -9999.000000   -9999.000000
57545     57545     hubei          109.4206       29.5278          122       158     2012      11        09        314              0.295208      12.750458       0.048528       0.284017       0.157500   -9999.000000       0.055900       0.549000
57545     57545     hubei          109.4206       29.5278          122       158     2012      11        10        315              0.291750      11.834229       1.175049       0.282446       0.140000       0.227400       0.060300   -9999.000000
57545     57545     hubei          109.4206       29.5278          122       158     2012      11        11        316              0.289083      12.720825       1.956328       0.281225       0.134000       0.302800       0.055700       0.302000
57545     57545     hubei          109.4206       29.5278          122       158     2012      11        12        317              0.289458      12.240051       0.000000       0.280299   -9999.000000       0.186800       0.107200   -9999.000000
57545     57545     hubei          109.4206       29.5278          122       158     2012      11        13        318              0.000000      11.872284       0.000000       0.278425   -9999.000000       0.161000   -9999.000000       0.375000
57545     57545     hubei          109.4206       29.5278          122       158     2012      11        14        319              0.287750      13.568481       3.950704       0.276579       0.146000   -9999.000000   -9999.000000       0.370000
57545     57545     hubei          109.4206       29.5278          122       158     2012      11        15        320              0.311042      13.055145      13.231622       0.280628       0.160000       0.198400       0.115700   -9999.000000
57545     57545     hubei          109.4206       29.5278          122       158     2012      11        16        321              0.300792      12.543823       1.427723       0.300916       0.142500       0.231300       0.108700       0.534000
57545     57545     hubei          109.4206       29.5278          122       158     2012      11        17        322              0.000000      11.580750       0.000000       0.295326       0.132000   -9999.000000       0.107800   -9999.000000
57545     57545     hubei          109.4206       29.5278          122       158     2012      11        18        323              0.288417      12.724640       0.435628       0.282877   -9999.000000       0.259700   -9999.000000       0.352000
57545     57545     hubei          109.4206       29.5278          122       158     2012      11        19        324              0.284375      12.953278       0.567156       0.278923       0.142000   -9999.000000   -9999.000000       0.334000
57545     57545     hubei          109.4206       29.5278          122       158     2012      11        20        325              0.298708      12.021545       2.333693       0.278639       0.160000       0.229700       0.056100   -9999.000000
57545     57545     hubei          109.4206       29.5278          122       158     2012      11        21        326              0.296542      11.018677       1.351816       0.283318       0.150500       0.297700       0.053100       0.334000
57545     57545     hubei          109.4206       29.5278          122       158     2012      11        22        327              0.304750      11.112640       4.572489       0.282405       0.149000   -9999.000000       0.054300   -9999.000000
57545     57545     hubei          109.4206       29.5278          122       158     2012      11        23        328              0.290333      10.781281       0.635809       0.289193   -9999.000000       0.414500       0.052400       0.421000
57545     57545     hubei          109.4206       29.5278          122       158     2012      11        24        329              0.289000       9.520538       2.535890       0.283900   -9999.000000       0.308700   -9999.000000   -9999.000000
57545     57545     hubei          109.4206       29.5278          122       158     2012      11        25        330              0.304792       8.547180       4.423313       0.282643       0.146500       0.067400   -9999.000000       0.452000
57545     57545     hubei          109.4206       29.5278          122       158     2012      11        26        331              0.295833       9.187469       0.000000       0.287537       0.154000       0.210900   -9999.000000       0.444000
57545     57545     hubei          109.4206       29.5278          122       158     2012      11        27        332              0.287708       8.342957       0.000000       0.284732       0.149000   -9999.000000       0.047600   -9999.000000
57545     57545     hubei          109.4206       29.5278          122       158     2012      11        28        333              0.287000       8.280914       0.000000       0.279690       0.142000       0.221000       0.046900       0.400000
57545     57545     hubei          109.4206       29.5278          122       158     2012      11        29        334              0.285167       8.394135       0.000000       0.277825   -9999.000000       0.184000       0.049000   -9999.000000
57545     57545     hubei          109.4206       29.5278          122       158     2012      11        30        335              0.283583       7.422729       0.689056       0.276974       0.163000       0.176100   -9999.000000       0.218000
57545     57545     hubei          109.4206       29.5278          122       158     2012      12        01        336              0.294125       7.324402       1.613816       0.277443       0.115000       0.135100   -9999.000000       0.427000
57545     57545     hubei          109.4206       29.5278          122       158     2012      12        02        337              0.287500       7.887268       1.205836       0.281269       0.113000   -9999.000000       0.046300   -9999.000000
57545     57545     hubei          109.4206       29.5278          122       158     2012      12        03        338              0.283250       7.984589       0.000000       0.276880       0.104000       0.207500       0.060800       0.233000
57545     57545     hubei          109.4206       29.5278          122       158     2012      12        04        339              0.281167       8.416229       0.000000       0.274884   -9999.000000       0.239400       0.061100   -9999.000000
57545     57545     hubei          109.4206       29.5278          122       158     2012      12        05        340              0.279708       7.417236       0.000000       0.274298   -9999.000000   -9999.000000   -9999.000000       0.172000
57545     57545     hubei          109.4206       29.5278          122       158     2012      12        06        341              0.277833       8.421417       0.000000       0.272777       0.114000       0.223200   -9999.000000   -9999.000000
57545     57545     hubei          109.4206       29.5278          122       158     2012      12        07        342              0.276478       7.625488       0.000000       0.272026       0.110000   -9999.000000       0.059400   -9999.000000
57545     57545     hubei          109.4206       29.5278          122       158     2012      12        08        343              0.276000       8.158783       0.000000       0.271238       0.108500   -9999.000000       0.061300       0.402000
57545     57545     hubei          109.4206       29.5278          122       158     2012      12        09        344              0.276583       9.119171       1.823264       0.270371   -9999.000000       0.428900       0.063600   -9999.000000
57545     57545     hubei          109.4206       29.5278          122       158     2012      12        10        345              0.288292       7.040497       3.106153       0.275364   -9999.000000   -9999.000000       0.039500       0.364000
57545     57545     hubei          109.4206       29.5278          122       158     2012      12        11        346              0.282750       5.950409       0.000000       0.280115       0.123000       0.468300   -9999.000000   -9999.000000
57545     57545     hubei          109.4206       29.5278          122       158     2012      12        12        347              0.281083       6.296478       2.190757       0.274449       0.138500   -9999.000000   -9999.000000       0.342000
57545     57545     hubei          109.4206       29.5278          122       158     2012      12        13        348              0.297500       5.582794       1.724738       0.275714       0.136000       0.174200       0.040300       0.400000
57545     57545     hubei          109.4206       29.5278          122       158     2012      12        14        349              0.294875       5.848267       0.067771       0.279308       0.128000   -9999.000000       0.040000   -9999.000000
57545     57545     hubei          109.4206       29.5278          122       158     2012      12        15        350              0.000000       6.796692       0.000000       0.275502   -9999.000000   -9999.000000       0.040900       0.283000
57545     57545     hubei          109.4206       29.5278          122       158     2012      12        16        351              0.282083       7.227997       1.830782       0.272719       0.130000       0.102500   -9999.000000   -9999.000000
57545     57545     hubei          109.4206       29.5278          122       158     2012      12        17        352              0.309526       7.059235      11.450007       0.273779       0.144000       0.174400   -9999.000000       0.521000
57545     57545     hubei          109.4206       29.5278          122       158     2012      12        18        353              0.288500       5.651733       0.316282       0.299481   -9999.000000       0.067200   -9999.000000       0.537000
57545     57545     hubei          109.4206       29.5278          122       158     2012      12        19        354              0.282042       4.864197       0.439629       0.283063   -9999.000000       0.295300       0.047000   -9999.000000
57545     57545     hubei          109.4206       29.5278          122       158     2012      12        20        355              0.000000       3.590332       0.078296       0.277730   -9999.000000   -9999.000000       0.045100       0.190000
57545     57545     hubei          109.4206       29.5278          122       158     2012      12        21        356              0.279917       3.371765       0.749281       0.274670   -9999.000000       0.157100       0.042900   -9999.000000
57545     57545     hubei          109.4206       29.5278          122       158     2012      12        22        357              0.282542       3.820038       0.078517       0.274237   -9999.000000       0.232000   -9999.000000       0.435000
57545     57545     hubei          109.4206       29.5278          122       158     2012      12        23        358              0.275667       3.197815       0.102189       0.273619   -9999.000000   -9999.000000   -9999.000000   -9999.000000
57545     57545     hubei          109.4206       29.5278          122       158     2012      12        24        359              0.276333       2.959503       0.855202       0.270212       0.097000       0.306800       0.052700       0.041000
57545     57545     hubei          109.4206       29.5278          122       158     2012      12        25        360              0.274833       4.346039       0.215440       0.272089       0.114000   -9999.000000       0.056000       0.099000
57545     57545     hubei          109.4206       29.5278          122       158     2012      12        26        361              0.000000       3.042511       0.107836       0.271000   -9999.000000       0.232900       0.052300   -9999.000000
57545     57545     hubei          109.4206       29.5278          122       158     2012      12        27        362              0.269200       2.664673       0.000000       0.268712   -9999.000000       0.143700       0.052500       0.234000
57545     57545     hubei          109.4206       29.5278          122       158     2012      12        28        363              0.271000       2.686676       9.960627       0.267843   -9999.000000   -9999.000000   -9999.000000   -9999.000000
57545     57545     hubei          109.4206       29.5278          122       158     2012      12        29        364              0.000000       2.446198       3.347258       0.278007   -9999.000000   -9999.000000   -9999.000000       0.344000
57545     57545     hubei          109.4206       29.5278          122       158     2012      12        30        365              0.000000       2.030670       0.861299       0.288401       0.100000   -9999.000000       0.047700       0.140000
57545     57545     hubei          109.4206       29.5278          122       158     2012      12        31        366              0.273133       2.789642       1.146556       0.283489   -9999.000000       0.193100       0.067200   -9999.000000
