# Supplementary material for: Research on Fusing Multisatellite Soil Moisture Data Based on Bayesian Model Averaging
Source: Hindawi journal article supplement (doi:10.1155/2018/9310838), 2018-06-25
Supplement: f1 [file 9310838.f1.zip › 2012_sm00-10cm_daily_ZDB_ZHY_57554_366days_allin.txt]

57554     57554     hunan          110.1600       29.3997          122       161     2012      01        01        001              0.000000   -9999.000000       0.000000   -9999.000000       0.103000   -9999.000000       0.058700   -9999.000000
57554     57554     hunan          110.1600       29.3997          122       161     2012      01        02        002              0.326208       4.339600       1.239687       0.270328       0.112000       0.065100   -9999.000000       0.064000
57554     57554     hunan          110.1600       29.3997          122       161     2012      01        03        003              0.000000       3.431152       0.482713       0.273017   -9999.000000   -9999.000000   -9999.000000   -9999.000000
57554     57554     hunan          110.1600       29.3997          122       161     2012      01        04        004              0.337042       1.649872       0.445834       0.263581   -9999.000000   -9999.000000       0.044900       0.027000
57554     57554     hunan          110.1600       29.3997          122       161     2012      01        05        005              0.340167       1.262817       0.773453       0.246304   -9999.000000       0.335500       0.044000       0.003000
57554     57554     hunan          110.1600       29.3997          122       161     2012      01        06        006              0.331500       0.755371       0.425148       0.224228       0.109000   -9999.000000       0.045400   -9999.000000
57554     57554     hunan          110.1600       29.3997          122       161     2012      01        07        007              0.331042       1.695801       0.364452       0.245424       0.105000       0.111000       0.045000       0.058000
57554     57554     hunan          110.1600       29.3997          122       161     2012      01        08        008              0.000000       1.711517       0.459230       0.251040       0.110000   -9999.000000   -9999.000000   -9999.000000
57554     57554     hunan          110.1600       29.3997          122       161     2012      01        09        009              0.328958       1.919037       0.974410       0.253187   -9999.000000       0.191900   -9999.000000       0.017000
57554     57554     hunan          110.1600       29.3997          122       161     2012      01        10        010              0.322125       2.333466       0.304110       0.258391   -9999.000000   -9999.000000       0.039500   -9999.000000
57554     57554     hunan          110.1600       29.3997          122       161     2012      01        11        011              0.323708       2.235565       0.434407       0.259874       0.092000   -9999.000000       0.042500   -9999.000000
57554     57554     hunan          110.1600       29.3997          122       161     2012      01        12        012              0.322250       2.313843       0.179323       0.260607       0.089000       0.005700       0.041400       0.032000
57554     57554     hunan          110.1600       29.3997          122       161     2012      01        13        013              0.317083       2.173309       0.358813       0.261028       0.096000   -9999.000000   -9999.000000   -9999.000000
57554     57554     hunan          110.1600       29.3997          122       161     2012      01        14        014              0.322292       2.241058      10.956258       0.261891   -9999.000000   -9999.000000   -9999.000000       0.040000
57554     57554     hunan          110.1600       29.3997          122       161     2012      01        15        015              0.334583       2.184631       2.137766       0.266888   -9999.000000   -9999.000000       0.041800   -9999.000000
57554     57554     hunan          110.1600       29.3997          122       161     2012      01        16        016              0.326875       1.568512       0.553764       0.283457       0.095000   -9999.000000       0.036800       0.145000
57554     57554     hunan          110.1600       29.3997          122       161     2012      01        17        017              0.000000       1.831909       1.347110       0.285035   -9999.000000   -9999.000000       0.036100       0.214000
57554     57554     hunan          110.1600       29.3997          122       161     2012      01        18        018              0.326583       2.363586       1.856712       0.276276       0.098000   -9999.000000       0.039600   -9999.000000
57554     57554     hunan          110.1600       29.3997          122       161     2012      01        19        019              0.326333       2.215851       0.376452       0.273459   -9999.000000   -9999.000000   -9999.000000       0.176000
57554     57554     hunan          110.1600       29.3997          122       161     2012      01        20        020              0.323667       2.036072       0.779283       0.272764   -9999.000000   -9999.000000   -9999.000000   -9999.000000
57554     57554     hunan          110.1600       29.3997          122       161     2012      01        21        021              0.336958       2.104004       0.821508       0.267620   -9999.000000   -9999.000000       0.032300       0.022000
57554     57554     hunan          110.1600       29.3997          122       161     2012      01        22        022              0.339375       1.569611       0.449378       0.259396   -9999.000000   -9999.000000       0.035700       0.015000
57554     57554     hunan          110.1600       29.3997          122       161     2012      01        23        023              0.331917       0.748260       0.000000       0.223155   -9999.000000   -9999.000000       0.038300   -9999.000000
57554     57554     hunan          110.1600       29.3997          122       161     2012      01        24        024              0.331042       0.695496       0.125553       0.208788   -9999.000000   -9999.000000   -9999.000000       0.044000
57554     57554     hunan          110.1600       29.3997          122       161     2012      01        25        025              0.340458       0.645508       3.560329       0.206780   -9999.000000       0.092000   -9999.000000   -9999.000000
57554     57554     hunan          110.1600       29.3997          122       161     2012      01        26        026              0.325125       1.120331       1.104722       0.222146   -9999.000000   -9999.000000   -9999.000000       0.110000
57554     57554     hunan          110.1600       29.3997          122       161     2012      01        27        027              0.325208       1.000031       1.540052       0.223628       0.094000       0.059700       0.036800   -9999.000000
57554     57554     hunan          110.1600       29.3997          122       161     2012      01        28        028              0.326792       1.846497       0.108590       0.248230   -9999.000000   -9999.000000       0.034600   -9999.000000
57554     57554     hunan          110.1600       29.3997          122       161     2012      01        29        029              0.334417       2.208832       1.211101       0.255780       0.094000   -9999.000000       0.037200       0.109000
57554     57554     hunan          110.1600       29.3997          122       161     2012      01        30        030              0.334042       2.943695       0.437561       0.260228   -9999.000000       0.009600   -9999.000000   -9999.000000
57554     57554     hunan          110.1600       29.3997          122       161     2012      01        31        031              0.337958       2.262970       0.753346       0.258568   -9999.000000       0.087300   -9999.000000       0.047000
57554     57554     hunan          110.1600       29.3997          122       161     2012      02        01        032              0.330542       4.737366       0.232175       0.263982       0.107500   -9999.000000       0.058500   -9999.000000
57554     57554     hunan          110.1600       29.3997          122       161     2012      02        02        033              0.329792       4.300964       0.081780       0.266059   -9999.000000       0.036500       0.057800   -9999.000000
57554     57554     hunan          110.1600       29.3997          122       161     2012      02        03        034              0.328042       2.540314       0.253967       0.260186       0.103000   -9999.000000       0.057800       0.028000
57554     57554     hunan          110.1600       29.3997          122       161     2012      02        04        035              0.333292       4.887817       0.000000       0.262954   -9999.000000       0.092400       0.058800   -9999.000000
57554     57554     hunan          110.1600       29.3997          122       161     2012      02        05        036              0.327542       5.697205       0.209638       0.264376       0.106000       0.011900   -9999.000000       0.085000
57554     57554     hunan          110.1600       29.3997          122       161     2012      02        06        037              0.324625       3.957489       0.302568       0.265308       0.107500   -9999.000000   -9999.000000   -9999.000000
57554     57554     hunan          110.1600       29.3997          122       161     2012      02        07        038              0.324375       3.866486       0.000000       0.266292   -9999.000000       0.025800       0.058600       0.011000
57554     57554     hunan          110.1600       29.3997          122       161     2012      02        08        039              0.324917       2.709045       0.000000       0.257464   -9999.000000   -9999.000000       0.062000   -9999.000000
57554     57554     hunan          110.1600       29.3997          122       161     2012      02        09        040              0.319375       1.974976       0.000000       0.247293   -9999.000000       0.017600       0.063600   -9999.000000
57554     57554     hunan          110.1600       29.3997          122       161     2012      02        10        041              0.333833       1.133423       0.000000       0.227356   -9999.000000       0.176900   -9999.000000       0.005000
57554     57554     hunan          110.1600       29.3997          122       161     2012      02        11        042              0.325000       2.506744       0.000000       0.240510       0.117000   -9999.000000   -9999.000000   -9999.000000
57554     57554     hunan          110.1600       29.3997          122       161     2012      02        12        043              0.324083       2.830688       0.064380       0.253202       0.118000       0.061600   -9999.000000       0.023000
57554     57554     hunan          110.1600       29.3997          122       161     2012      02        13        044              0.320292       3.922028       0.229210       0.258994       0.114000   -9999.000000   -9999.000000   -9999.000000
57554     57554     hunan          110.1600       29.3997          122       161     2012      02        14        045              0.320542       2.895020       0.888315       0.260325   -9999.000000       0.108500       0.087600       0.080000
57554     57554     hunan          110.1600       29.3997          122       161     2012      02        15        046              0.323125       2.575775       0.000000       0.262203   -9999.000000   -9999.000000       0.088500       0.106000
57554     57554     hunan          110.1600       29.3997          122       161     2012      02        16        047              0.330375       2.682892       0.146025       0.260505       0.107000   -9999.000000   -9999.000000   -9999.000000
57554     57554     hunan          110.1600       29.3997          122       161     2012      02        17        048              0.330875       3.980042       0.000000       0.260798       0.109000       0.007200   -9999.000000       0.002000
57554     57554     hunan          110.1600       29.3997          122       161     2012      02        18        049              0.334417       4.349762       0.000000       0.257461   -9999.000000       0.058800       0.080600   -9999.000000
57554     57554     hunan          110.1600       29.3997          122       161     2012      02        19        050              0.336208       2.694336       0.000000       0.247577       0.099000       0.048900       0.081000       0.005000
57554     57554     hunan          110.1600       29.3997          122       161     2012      02        20        051              0.332292       5.448486       0.000000       0.253866   -9999.000000   -9999.000000       0.055500       0.188000
57554     57554     hunan          110.1600       29.3997          122       161     2012      02        21        052              0.333792       5.191864       3.199298       0.258421       0.073000   -9999.000000   -9999.000000   -9999.000000
57554     57554     hunan          110.1600       29.3997          122       161     2012      02        22        053              0.342458       5.187714       0.000000       0.264622       0.067500       0.030600   -9999.000000       0.181000
57554     57554     hunan          110.1600       29.3997          122       161     2012      02        23        054              0.338792       7.330902       0.033383       0.267431       0.069500       0.162600   -9999.000000   -9999.000000
57554     57554     hunan          110.1600       29.3997          122       161     2012      02        24        055              0.328750       6.364410       0.288379       0.263642       0.072000   -9999.000000       0.056700       0.033000
57554     57554     hunan          110.1600       29.3997          122       161     2012      02        25        056              0.324917       3.977234       0.247182       0.262537   -9999.000000       0.058500       0.055900   -9999.000000
57554     57554     hunan          110.1600       29.3997          122       161     2012      02        26        057              0.330708       2.794556       0.477237       0.259391   -9999.000000   -9999.000000       0.057900   -9999.000000
57554     57554     hunan          110.1600       29.3997          122       161     2012      02        27        058              0.330208       2.191986       0.290920       0.252808   -9999.000000   -9999.000000   -9999.000000   -9999.000000
57554     57554     hunan          110.1600       29.3997          122       161     2012      02        28        059              0.332083       1.902252       0.143390       0.251178       0.074000       0.178600   -9999.000000   -9999.000000
57554     57554     hunan          110.1600       29.3997          122       161     2012      02        29        060              0.000000   -9999.000000       1.567920   -9999.000000       0.070000   -9999.000000   -9999.000000   -9999.000000
57554     57554     hunan          110.1600       29.3997          122       161     2012      03        01        061              0.338208       2.913177       0.314145       0.257467   -9999.000000       0.080800       0.044100   -9999.000000
57554     57554     hunan          110.1600       29.3997          122       161     2012      03        02        062              0.339200       4.383911       1.079129       0.261086   -9999.000000   -9999.000000       0.048500       0.036000
57554     57554     hunan          110.1600       29.3997          122       161     2012      03        03        063              0.000000       4.043182       0.911871       0.262727       0.094000       0.181400       0.051500       0.027000
57554     57554     hunan          110.1600       29.3997          122       161     2012      03        04        064              0.332368       3.712067       0.053700       0.265116       0.096000   -9999.000000   -9999.000000   -9999.000000
57554     57554     hunan          110.1600       29.3997          122       161     2012      03        05        065              0.334375       3.398193       0.000000       0.262572       0.086500   -9999.000000   -9999.000000       0.010000
57554     57554     hunan          110.1600       29.3997          122       161     2012      03        06        066              0.337125       5.160309       0.524753       0.261656       0.093000       0.020300       0.046100   -9999.000000
57554     57554     hunan          110.1600       29.3997          122       161     2012      03        07        067              0.000000       4.760956       3.277667       0.262343   -9999.000000   -9999.000000       0.044900       0.079000
57554     57554     hunan          110.1600       29.3997          122       161     2012      03        08        068              0.339750       4.308167       1.769692       0.267995   -9999.000000   -9999.000000       0.045100       0.260000
57554     57554     hunan          110.1600       29.3997          122       161     2012      03        09        069              0.334458       4.201416       0.416505       0.272131       0.093000   -9999.000000       0.046100   -9999.000000
57554     57554     hunan          110.1600       29.3997          122       161     2012      03        10        070              0.342167       4.210876       0.635248       0.269444       0.086500   -9999.000000   -9999.000000       0.002000
57554     57554     hunan          110.1600       29.3997          122       161     2012      03        11        071              0.344083       5.609528       0.000000       0.265081       0.076000       0.069900   -9999.000000   -9999.000000
57554     57554     hunan          110.1600       29.3997          122       161     2012      03        12        072              0.343833       6.033020       0.000000       0.262607   -9999.000000       0.236400       0.056900       0.017000
57554     57554     hunan          110.1600       29.3997          122       161     2012      03        13        073              0.342000       6.197174       0.281906       0.260872       0.072000   -9999.000000       0.057600   -9999.000000
57554     57554     hunan          110.1600       29.3997          122       161     2012      03        14        074              0.334083       9.908386       0.400515       0.258377       0.079000       0.080400   -9999.000000       0.121000
57554     57554     hunan          110.1600       29.3997          122       161     2012      03        15        075              0.335917       8.821594       0.000000       0.258364       0.081000   -9999.000000   -9999.000000       0.204000
57554     57554     hunan          110.1600       29.3997          122       161     2012      03        16        076              0.335292       9.462524       0.403239       0.258541       0.077000       0.151600   -9999.000000   -9999.000000
57554     57554     hunan          110.1600       29.3997          122       161     2012      03        17        077              0.335083      10.038696       0.430955       0.259959   -9999.000000       0.233900       0.056600       0.187000
57554     57554     hunan          110.1600       29.3997          122       161     2012      03        18        078              0.343667      13.601135       0.976909       0.258608       0.071000   -9999.000000       0.056800   -9999.000000
57554     57554     hunan          110.1600       29.3997          122       161     2012      03        19        079              0.337375      15.711090       0.540803       0.258082       0.084000       0.096300       0.074000       0.220000
57554     57554     hunan          110.1600       29.3997          122       161     2012      03        20        080              0.333375      11.718750       1.269792       0.259181       0.083000   -9999.000000       0.074800       0.243000
57554     57554     hunan          110.1600       29.3997          122       161     2012      03        21        081              0.332417       8.670013      27.395588       0.261475       0.105000       0.106700   -9999.000000   -9999.000000
57554     57554     hunan          110.1600       29.3997          122       161     2012      03        22        082              0.357125       8.429230      32.247032       0.290972   -9999.000000       0.136100   -9999.000000       0.543000
57554     57554     hunan          110.1600       29.3997          122       161     2012      03        23        083              0.350208       7.310608       0.290152       0.329210   -9999.000000   -9999.000000       0.071400   -9999.000000
57554     57554     hunan          110.1600       29.3997          122       161     2012      03        24        084              0.345250      10.797577       0.299119       0.297868       0.080000       0.131600       0.070300       0.324000
57554     57554     hunan          110.1600       29.3997          122       161     2012      03        25        085              0.000000      12.724945       0.000000       0.280606       0.078500   -9999.000000       0.068300   -9999.000000
57554     57554     hunan          110.1600       29.3997          122       161     2012      03        26        086              0.341042      14.478455       0.000000       0.272660       0.078500       0.048100       0.065300   -9999.000000
57554     57554     hunan          110.1600       29.3997          122       161     2012      03        27        087              0.334583      15.136230       0.643977       0.268230       0.082000       0.087600   -9999.000000       0.307000
57554     57554     hunan          110.1600       29.3997          122       161     2012      03        28        088              0.339250      14.928223       8.296310       0.268931   -9999.000000   -9999.000000   -9999.000000   -9999.000000
57554     57554     hunan          110.1600       29.3997          122       161     2012      03        29        089              0.354625      13.486908      23.145926       0.287879   -9999.000000       0.108000       0.064300       0.608000
57554     57554     hunan          110.1600       29.3997          122       161     2012      03        30        090              0.354083      14.761444       0.899009       0.309799       0.091000       0.161200       0.068200   -9999.000000
57554     57554     hunan          110.1600       29.3997          122       161     2012      03        31        091              0.345667      12.956268       0.000000       0.297684       0.081500       0.022500       0.068000       0.426000
57554     57554     hunan          110.1600       29.3997          122       161     2012      04        01        092              0.346583      15.046204       0.000000       0.280564       0.085000       0.108400   -9999.000000       0.297000
57554     57554     hunan          110.1600       29.3997          122       161     2012      04        02        093              0.341500      16.351135       0.884002       0.274256   -9999.000000   -9999.000000   -9999.000000   -9999.000000
57554     57554     hunan          110.1600       29.3997          122       161     2012      04        03        094              0.334250      19.154358       0.628824       0.271253       0.096000   -9999.000000       0.045400       0.189000
57554     57554     hunan          110.1600       29.3997          122       161     2012      04        04        095              0.348042      14.647736      24.143848       0.273715       0.104000       0.323600       0.067100   -9999.000000
57554     57554     hunan          110.1600       29.3997          122       161     2012      04        05        096              0.344458      12.612793       0.039390       0.312380       0.088000   -9999.000000       0.066600       0.371000
57554     57554     hunan          110.1600       29.3997          122       161     2012      04        06        097              0.342125      15.464844       0.373799       0.284771       0.089000       0.076700       0.067300       0.407000
57554     57554     hunan          110.1600       29.3997          122       161     2012      04        07        098              0.333375      15.798553       0.210161       0.278819   -9999.000000   -9999.000000   -9999.000000   -9999.000000
57554     57554     hunan          110.1600       29.3997          122       161     2012      04        08        099              0.334750      14.590607       6.397276       0.277668   -9999.000000       0.120200   -9999.000000       0.235000
57554     57554     hunan          110.1600       29.3997          122       161     2012      04        09        100              0.338292      16.264130       1.189840       0.281938       0.103500       0.016300       0.052200   -9999.000000
57554     57554     hunan          110.1600       29.3997          122       161     2012      04        10        101              0.341500      14.957306      21.977001       0.288573       0.096500   -9999.000000       0.057600       0.621000
57554     57554     hunan          110.1600       29.3997          122       161     2012      04        11        102              0.341333      15.321167       2.978783       0.313915       0.106000       0.065900       0.058100   -9999.000000
57554     57554     hunan          110.1600       29.3997          122       161     2012      04        12        103              0.353125      16.662231      39.802898       0.294893   -9999.000000   -9999.000000       0.055100       0.643000
57554     57554     hunan          110.1600       29.3997          122       161     2012      04        13        104              0.344833      14.692474       2.860426       0.331215   -9999.000000       0.059900   -9999.000000       0.570000
57554     57554     hunan          110.1600       29.3997          122       161     2012      04        14        105              0.345750      13.501587       7.795688       0.303672       0.112000       0.075900   -9999.000000   -9999.000000
57554     57554     hunan          110.1600       29.3997          122       161     2012      04        15        106              0.349667      14.349335       0.419204       0.303500       0.109000   -9999.000000       0.052000       0.400000
57554     57554     hunan          110.1600       29.3997          122       161     2012      04        16        107              0.341042      13.815460       0.372732       0.301412       0.101000       0.086900       0.101000   -9999.000000
57554     57554     hunan          110.1600       29.3997          122       161     2012      04        17        108              0.349167      14.651520       0.536881       0.294015       0.106000       0.150200       0.107200       0.372000
57554     57554     hunan          110.1600       29.3997          122       161     2012      04        18        109              0.331917      13.672302       0.581430       0.292098   -9999.000000       0.010700   -9999.000000       0.395000
57554     57554     hunan          110.1600       29.3997          122       161     2012      04        19        110              0.327250      17.399261       2.238757       0.286915       0.096000       0.109600   -9999.000000   -9999.000000
57554     57554     hunan          110.1600       29.3997          122       161     2012      04        20        111              0.328500      18.564514       0.120518       0.285662       0.106000   -9999.000000       0.100300       0.424000
57554     57554     hunan          110.1600       29.3997          122       161     2012      04        21        112              0.322458      16.758911       0.000000       0.284704       0.142500       0.119600       0.097600   -9999.000000
57554     57554     hunan          110.1600       29.3997          122       161     2012      04        22        113              0.316333      19.262726       0.085507       0.277923       0.126000       0.174200       0.092900       0.403000
57554     57554     hunan          110.1600       29.3997          122       161     2012      04        23        114              0.325375      20.738922       0.393262       0.274766   -9999.000000   -9999.000000       0.137300   -9999.000000
57554     57554     hunan          110.1600       29.3997          122       161     2012      04        24        115              0.332667      18.315887       1.732813       0.278189   -9999.000000       0.299300   -9999.000000   -9999.000000
57554     57554     hunan          110.1600       29.3997          122       161     2012      04        25        116              0.000000      21.596161       1.938526       0.279467       0.147500   -9999.000000   -9999.000000       0.356000
57554     57554     hunan          110.1600       29.3997          122       161     2012      04        26        117              0.326208      18.410950       0.000000       0.280447       0.137000   -9999.000000       0.127000   -9999.000000
57554     57554     hunan          110.1600       29.3997          122       161     2012      04        27        118              0.332042      19.698853       0.000000       0.272439       0.116000       0.106800       0.124500       0.309000
57554     57554     hunan          110.1600       29.3997          122       161     2012      04        28        119              0.348167      20.865143       6.646875       0.269165   -9999.000000   -9999.000000       0.138800   -9999.000000
57554     57554     hunan          110.1600       29.3997          122       161     2012      04        29        120              0.346458      18.538696      18.895557       0.288104   -9999.000000       0.056200       0.135300       0.470000
57554     57554     hunan          110.1600       29.3997          122       161     2012      04        30        121              0.349750      19.603424       8.289258       0.292195       0.163000   -9999.000000   -9999.000000       0.564000
57554     57554     hunan          110.1600       29.3997          122       161     2012      05        01        122              0.349792      18.953156       5.187929       0.307999       0.178000       0.154000   -9999.000000   -9999.000000
57554     57554     hunan          110.1600       29.3997          122       161     2012      05        02        123              0.343167      19.058350       1.965973       0.295938       0.168000       0.192400       0.096000       0.587000
57554     57554     hunan          110.1600       29.3997          122       161     2012      05        03        124              0.348250      19.567108       1.907622       0.286861       0.166000   -9999.000000       0.107600   -9999.000000
57554     57554     hunan          110.1600       29.3997          122       161     2012      05        04        125              0.343000      18.636536       0.139470       0.286998   -9999.000000       0.274400       0.107400       0.558000
57554     57554     hunan          110.1600       29.3997          122       161     2012      05        05        126              0.333042      20.183960       0.000000       0.280309       0.154000   -9999.000000   -9999.000000       0.608000
57554     57554     hunan          110.1600       29.3997          122       161     2012      05        06        127              0.323750      22.380127       0.132758       0.275359       0.152500       0.061300   -9999.000000   -9999.000000
57554     57554     hunan          110.1600       29.3997          122       161     2012      05        07        128              0.317458      22.565735       2.422023       0.274424   -9999.000000       0.152000       0.078000       0.695000
57554     57554     hunan          110.1600       29.3997          122       161     2012      05        08        129              0.320000      22.938782       8.425817       0.278266       0.143000   -9999.000000       0.084000   -9999.000000
57554     57554     hunan          110.1600       29.3997          122       161     2012      05        09        130              0.330083      22.876190       1.433270       0.288979   -9999.000000       0.091400       0.080800       0.723000
57554     57554     hunan          110.1600       29.3997          122       161     2012      05        10        131              0.326250      21.294464       0.000000       0.289250       0.153000   -9999.000000       0.078900   -9999.000000
57554     57554     hunan          110.1600       29.3997          122       161     2012      05        11        132              0.328000      22.792938      12.262017       0.277414       0.189000   -9999.000000   -9999.000000       0.864000
57554     57554     hunan          110.1600       29.3997          122       161     2012      05        12        133              0.332125      21.977570      14.044908       0.296502       0.217500       0.166300   -9999.000000       1.000000
57554     57554     hunan          110.1600       29.3997          122       161     2012      05        13        134              0.330542      20.377777      17.488686       0.306460       0.209000   -9999.000000       0.081600   -9999.000000
57554     57554     hunan          110.1600       29.3997          122       161     2012      05        14        135              0.336542      18.948120       2.457850       0.305677   -9999.000000       0.216700       0.146700       0.542000
57554     57554     hunan          110.1600       29.3997          122       161     2012      05        15        136              0.332667      17.920685       0.054998       0.300014       0.185000       0.207900       0.149800   -9999.000000
57554     57554     hunan          110.1600       29.3997          122       161     2012      05        16        137              0.330542      18.056030       0.000000       0.287414       0.170000   -9999.000000   -9999.000000       0.506000
57554     57554     hunan          110.1600       29.3997          122       161     2012      05        17        138              0.326417      20.280304       0.000000       0.281214       0.170000       0.052600   -9999.000000       0.651000
57554     57554     hunan          110.1600       29.3997          122       161     2012      05        18        139              0.326583      21.512634       2.878843       0.276271       0.206000   -9999.000000   -9999.000000   -9999.000000
57554     57554     hunan          110.1600       29.3997          122       161     2012      05        19        140              0.326000      19.503174       0.000000       0.283833   -9999.000000       0.131200       0.134700       0.518000
57554     57554     hunan          110.1600       29.3997          122       161     2012      05        20        141              0.317875      23.082214       0.000000       0.276132   -9999.000000   -9999.000000       0.149500   -9999.000000
57554     57554     hunan          110.1600       29.3997          122       161     2012      05        21        142              0.323917      22.792603      13.995532       0.270949       0.187000   -9999.000000       0.126900       0.873000
57554     57554     hunan          110.1600       29.3997          122       161     2012      05        22        143              0.340375      21.455902      12.222186       0.291548       0.248000       0.152200   -9999.000000   -9999.000000
57554     57554     hunan          110.1600       29.3997          122       161     2012      05        23        144              0.349667      19.330536      10.522153       0.307930   -9999.000000   -9999.000000   -9999.000000   -9999.000000
57554     57554     hunan          110.1600       29.3997          122       161     2012      05        24        145              0.352875      18.282196       4.019109       0.303772       0.283000       0.235400       0.133900       0.817000
57554     57554     hunan          110.1600       29.3997          122       161     2012      05        25        146              0.000000      18.042084       0.713958       0.296270   -9999.000000       0.070900       0.134100   -9999.000000
57554     57554     hunan          110.1600       29.3997          122       161     2012      05        26        147              0.347500      18.488251       0.000000       0.287561       0.229000   -9999.000000       0.133100       0.443000
57554     57554     hunan          110.1600       29.3997          122       161     2012      05        27        148              0.351250      21.299194       0.107571       0.280184       0.221500       0.227000       0.137500   -9999.000000
57554     57554     hunan          110.1600       29.3997          122       161     2012      05        28        149              0.351625      21.627655       1.686842       0.277798       0.255500       0.038500   -9999.000000       0.669000
57554     57554     hunan          110.1600       29.3997          122       161     2012      05        29        150              0.358667      20.518494      23.095268       0.279916   -9999.000000   -9999.000000   -9999.000000       0.871000
57554     57554     hunan          110.1600       29.3997          122       161     2012      05        30        151              0.348375      19.917511       0.831326       0.313307   -9999.000000       0.126700       0.122500   -9999.000000
57554     57554     hunan          110.1600       29.3997          122       161     2012      05        31        152              0.350042      22.109802       2.708789       0.286552       0.233000   -9999.000000       0.137600   -9999.000000
57554     57554     hunan          110.1600       29.3997          122       161     2012      06        01        153              0.357500      21.085022       2.153555       0.286726       0.220000       0.286500       0.146400   -9999.000000
57554     57554     hunan          110.1600       29.3997          122       161     2012      06        02        154              0.349417      19.533417       0.268367       0.287246       0.194500       0.305000   -9999.000000       0.493000
57554     57554     hunan          110.1600       29.3997          122       161     2012      06        03        155              0.360917      21.407898      17.929926       0.278895   -9999.000000   -9999.000000   -9999.000000       0.617000
57554     57554     hunan          110.1600       29.3997          122       161     2012      06        04        156              0.358625      19.699127       8.095495       0.308143   -9999.000000       0.167400       0.073000   -9999.000000
57554     57554     hunan          110.1600       29.3997          122       161     2012      06        05        157              0.358083      19.498077       2.346515       0.303786       0.223000   -9999.000000       0.074500       0.782000
57554     57554     hunan          110.1600       29.3997          122       161     2012      06        06        158              0.365125      21.433533       6.490019       0.290161       0.213000       0.229800       0.076700   -9999.000000
57554     57554     hunan          110.1600       29.3997          122       161     2012      06        07        159              0.365375      21.833679      15.324921       0.296688       0.202000   -9999.000000       0.079700       0.554000
57554     57554     hunan          110.1600       29.3997          122       161     2012      06        08        160              0.356458      21.777618       0.353241       0.309289       0.200500   -9999.000000   -9999.000000   -9999.000000
57554     57554     hunan          110.1600       29.3997          122       161     2012      06        09        161              0.354708      24.203674       1.248078       0.289006   -9999.000000       0.109700   -9999.000000       0.466000
57554     57554     hunan          110.1600       29.3997          122       161     2012      06        10        162              0.363875      24.862793      15.866169       0.283682   -9999.000000       0.247700       0.068800       0.710000
57554     57554     hunan          110.1600       29.3997          122       161     2012      06        11        163              0.000000      23.253967       0.000000       0.306657       0.157000       0.042100       0.119100   -9999.000000
57554     57554     hunan          110.1600       29.3997          122       161     2012      06        12        164              0.347792      24.043640       0.559661       0.288232       0.156000       0.135600       0.115300       0.544000
57554     57554     hunan          110.1600       29.3997          122       161     2012      06        13        165              0.333083      24.178741       0.571029       0.282727       0.145500   -9999.000000       0.113100   -9999.000000
57554     57554     hunan          110.1600       29.3997          122       161     2012      06        14        166              0.330750      24.884888       0.415332       0.279019       0.147000       0.321200   -9999.000000       0.499000
57554     57554     hunan          110.1600       29.3997          122       161     2012      06        15        167              0.323500      23.492615       0.000000       0.279405   -9999.000000   -9999.000000   -9999.000000       0.626000
57554     57554     hunan          110.1600       29.3997          122       161     2012      06        16        168              0.313958      24.281952       0.000000       0.274145       0.137000   -9999.000000       0.111800   -9999.000000
57554     57554     hunan          110.1600       29.3997          122       161     2012      06        17        169              0.305750      24.105652       0.000000       0.271926       0.149500       0.141200       0.109100       0.558000
57554     57554     hunan          110.1600       29.3997          122       161     2012      06        18        170              0.298375      24.805511       0.415804       0.269222       0.143000   -9999.000000       0.174200   -9999.000000
57554     57554     hunan          110.1600       29.3997          122       161     2012      06        19        171              0.292292      25.200012       0.425405       0.267682       0.133000       0.190700   -9999.000000       0.618000
57554     57554     hunan          110.1600       29.3997          122       161     2012      06        20        172              0.287083      25.536285       0.000000       0.266403   -9999.000000       0.362900   -9999.000000   -9999.000000
57554     57554     hunan          110.1600       29.3997          122       161     2012      06        21        173              0.306750      25.962036       7.796847       0.264327       0.194000   -9999.000000       0.172500   -9999.000000
57554     57554     hunan          110.1600       29.3997          122       161     2012      06        22        174              0.323000      25.048645       0.923629       0.281527       0.185500       0.337500       0.168100       0.483000
57554     57554     hunan          110.1600       29.3997          122       161     2012      06        23        175              0.312208      26.193848       1.684343       0.271495       0.181500   -9999.000000       0.172000   -9999.000000
57554     57554     hunan          110.1600       29.3997          122       161     2012      06        24        176              0.300792      26.453369       0.071955       0.268139       0.159000       0.240900       0.166000       0.521000
57554     57554     hunan          110.1600       29.3997          122       161     2012      06        25        177              0.297833      26.849762       2.883933       0.262945   -9999.000000   -9999.000000   -9999.000000   -9999.000000
57554     57554     hunan          110.1600       29.3997          122       161     2012      06        26        178              0.327458      25.625641      15.037015       0.264889   -9999.000000   -9999.000000   -9999.000000       0.889000
57554     57554     hunan          110.1600       29.3997          122       161     2012      06        27        179              0.330875      24.961639      11.594275       0.295608       0.244000       0.157600       0.107600       0.875000
57554     57554     hunan          110.1600       29.3997          122       161     2012      06        28        180              0.332250      25.234833      17.951773       0.296795       0.231500       0.152700       0.105500   -9999.000000
57554     57554     hunan          110.1600       29.3997          122       161     2012      06        29        181              0.332667      24.739166       8.304273       0.305843       0.190500       0.172400       0.101500       0.801000
57554     57554     hunan          110.1600       29.3997          122       161     2012      06        30        182              0.333500      26.673737       2.489861       0.302492   -9999.000000       0.069100       0.100300   -9999.000000
57554     57554     hunan          110.1600       29.3997          122       161     2012      07        01        183              0.330625      27.497559       0.944401       0.290747   -9999.000000   -9999.000000   -9999.000000       0.740000
57554     57554     hunan          110.1600       29.3997          122       161     2012      07        02        184              0.327792      26.752228       1.756745       0.281647       0.160000       0.168400   -9999.000000       0.670000
57554     57554     hunan          110.1600       29.3997          122       161     2012      07        03        185              0.321042      27.032532       0.463784       0.273579       0.163000       0.162300       0.065500   -9999.000000
57554     57554     hunan          110.1600       29.3997          122       161     2012      07        04        186              0.314042      26.982910       0.064030       0.271311       0.153500   -9999.000000       0.068000       0.482000
57554     57554     hunan          110.1600       29.3997          122       161     2012      07        05        187              0.310000      26.748291       1.914499       0.268776   -9999.000000       0.042200       0.064100   -9999.000000
57554     57554     hunan          110.1600       29.3997          122       161     2012      07        06        188              0.298167      26.217926       0.000000       0.272360   -9999.000000   -9999.000000   -9999.000000       0.492000
57554     57554     hunan          110.1600       29.3997          122       161     2012      07        07        189              0.288208      27.088806       0.290737       0.269246   -9999.000000       0.191100   -9999.000000   -9999.000000
57554     57554     hunan          110.1600       29.3997          122       161     2012      07        08        190              0.282958      27.538513       0.000000       0.264671       0.154500       0.411200       0.065500       0.535000
57554     57554     hunan          110.1600       29.3997          122       161     2012      07        09        191              0.280400      27.290375       0.000000       0.261928       0.159000   -9999.000000       0.067000       0.587000
57554     57554     hunan          110.1600       29.3997          122       161     2012      07        10        192              0.000000      26.703430       0.263421       0.261893       0.150000       0.153000       0.065500   -9999.000000
57554     57554     hunan          110.1600       29.3997          122       161     2012      07        11        193              0.000000      27.634308      25.056705       0.259161   -9999.000000   -9999.000000       0.056300       1.000000
57554     57554     hunan          110.1600       29.3997          122       161     2012      07        12        194              0.000000      27.178741      77.554955       0.304327       0.205000       0.233500   -9999.000000   -9999.000000
57554     57554     hunan          110.1600       29.3997          122       161     2012      07        13        195              0.000000      26.601410      58.890106       0.332051       0.299000   -9999.000000   -9999.000000       1.000000
57554     57554     hunan          110.1600       29.3997          122       161     2012      07        14        196              0.000000      24.783142       0.198877       0.420295       0.235000   -9999.000000       0.063100       0.756000
57554     57554     hunan          110.1600       29.3997          122       161     2012      07        15        197              0.000000      26.007111       0.205075       0.376821       0.219000       0.100400       0.067800   -9999.000000
57554     57554     hunan          110.1600       29.3997          122       161     2012      07        16        198              0.000000      26.794830       3.941335       0.319018       0.280000   -9999.000000       0.115900       0.734000
57554     57554     hunan          110.1600       29.3997          122       161     2012      07        17        199              0.000000      24.902954       5.279262       0.309755   -9999.000000       0.091200   -9999.000000   -9999.000000
57554     57554     hunan          110.1600       29.3997          122       161     2012      07        18        200              0.000000      25.183960      10.458011       0.305937       0.265000       0.119000   -9999.000000       0.826000
57554     57554     hunan          110.1600       29.3997          122       161     2012      07        19        201              0.000000      24.963654      14.727344       0.308205       0.258000   -9999.000000   -9999.000000   -9999.000000
57554     57554     hunan          110.1600       29.3997          122       161     2012      07        20        202              0.000000      24.891541       2.365461       0.316839       0.221500       0.099800       0.104800   -9999.000000
57554     57554     hunan          110.1600       29.3997          122       161     2012      07        21        203              0.000000      26.911163       0.000000       0.302614       0.213000       0.119900       0.110200       0.643000
57554     57554     hunan          110.1600       29.3997          122       161     2012      07        22        204              0.000000      27.854706       0.519189       0.294307   -9999.000000   -9999.000000       0.105200   -9999.000000
57554     57554     hunan          110.1600       29.3997          122       161     2012      07        23        205              0.000000      28.025330       3.835534       0.289726       0.240000       0.085000   -9999.000000       0.659000
57554     57554     hunan          110.1600       29.3997          122       161     2012      07        24        206              0.000000      27.766235       1.668115       0.289102       0.245000   -9999.000000   -9999.000000   -9999.000000
57554     57554     hunan          110.1600       29.3997          122       161     2012      07        25        207              0.000000      27.580261       0.335325       0.285372       0.231500       0.128400       0.143000       0.633000
57554     57554     hunan          110.1600       29.3997          122       161     2012      07        26        208              0.000000      27.708893       2.522197       0.280126       0.221000       0.260600       0.144800       0.545000
57554     57554     hunan          110.1600       29.3997          122       161     2012      07        27        209              0.000000      28.337189       0.970353       0.280836   -9999.000000   -9999.000000       0.146100   -9999.000000
57554     57554     hunan          110.1600       29.3997          122       161     2012      07        28        210              0.000000      28.268585       2.847783       0.277100   -9999.000000       0.067200       0.141700       0.510000
57554     57554     hunan          110.1600       29.3997          122       161     2012      07        29        211              0.000000      28.298340       0.000000       0.278723       0.230000   -9999.000000   -9999.000000   -9999.000000
57554     57554     hunan          110.1600       29.3997          122       161     2012      07        30        212              0.000000      28.534515       0.649752       0.272284       0.209500       0.103800   -9999.000000       0.595000
57554     57554     hunan          110.1600       29.3997          122       161     2012      07        31        213              0.000000      28.966370       6.209335       0.268120       0.215500   -9999.000000       0.171700       0.649000
57554     57554     hunan          110.1600       29.3997          122       161     2012      08        01        214              0.000000      28.747192      13.334710       0.278739       0.246000   -9999.000000       0.174400   -9999.000000
57554     57554     hunan          110.1600       29.3997          122       161     2012      08        02        215              0.000000      28.443237       0.000000       0.287592   -9999.000000       0.103000       0.175800       0.380000
57554     57554     hunan          110.1600       29.3997          122       161     2012      08        03        216              0.000000      27.742706       0.000000       0.282808       0.265000       0.043800   -9999.000000   -9999.000000
57554     57554     hunan          110.1600       29.3997          122       161     2012      08        04        217              0.000000      28.107697       0.801237       0.269872       0.263000       0.045700   -9999.000000       0.433000
57554     57554     hunan          110.1600       29.3997          122       161     2012      08        05        218              0.000000      28.526489      16.431229       0.264965       0.286000       0.176800   -9999.000000   -9999.000000
57554     57554     hunan          110.1600       29.3997          122       161     2012      08        06        219              0.000000      26.522797       0.173904       0.295913       0.235000   -9999.000000       0.153900       0.542000
57554     57554     hunan          110.1600       29.3997          122       161     2012      08        07        220              0.000000      27.592438       2.208226       0.282311   -9999.000000       0.085500       0.147700       0.552000
57554     57554     hunan          110.1600       29.3997          122       161     2012      08        08        221              0.000000      27.804138       0.276715       0.269632   -9999.000000       0.134600       0.156800   -9999.000000
57554     57554     hunan          110.1600       29.3997          122       161     2012      08        09        222              0.000000      28.283905       0.000000       0.264733       0.265000   -9999.000000   -9999.000000       0.509000
57554     57554     hunan          110.1600       29.3997          122       161     2012      08        10        223              0.267933      28.467529       0.384750       0.259506       0.249500       0.035400   -9999.000000   -9999.000000
57554     57554     hunan          110.1600       29.3997          122       161     2012      08        11        224              0.269167      28.708221       0.250082       0.256565       0.271000   -9999.000000       0.159200       0.524000
57554     57554     hunan          110.1600       29.3997          122       161     2012      08        12        225              0.268667      28.905487       2.290890       0.254446       0.260000       0.156700       0.154700       0.580000
57554     57554     hunan          110.1600       29.3997          122       161     2012      08        13        226              0.267333      28.737335       4.149580       0.258628   -9999.000000       0.302600       0.127800   -9999.000000
57554     57554     hunan          110.1600       29.3997          122       161     2012      08        14        227              0.266625      29.105499       0.000000       0.258548       0.313000   -9999.000000       0.128400       0.597000
57554     57554     hunan          110.1600       29.3997          122       161     2012      08        15        228              0.265458      28.876221       3.137664       0.257954       0.283000       0.067500   -9999.000000   -9999.000000
57554     57554     hunan          110.1600       29.3997          122       161     2012      08        16        229              0.264292      28.865387       0.000000       0.260740       0.269000   -9999.000000   -9999.000000       0.476000
57554     57554     hunan          110.1600       29.3997          122       161     2012      08        17        230              0.264375      28.266388       0.000000       0.253269       0.256000       0.070400       0.126800   -9999.000000
57554     57554     hunan          110.1600       29.3997          122       161     2012      08        18        231              0.265333      28.809357       0.000000       0.246574   -9999.000000       0.089000       0.133400   -9999.000000
57554     57554     hunan          110.1600       29.3997          122       161     2012      08        19        232              0.265708      29.529144       1.529782       0.241618       0.287000   -9999.000000       0.125600       0.530000
57554     57554     hunan          110.1600       29.3997          122       161     2012      08        20        233              0.277792      29.740356      85.441154       0.243831       0.287000       0.075200   -9999.000000   -9999.000000
57554     57554     hunan          110.1600       29.3997          122       161     2012      08        21        234              0.302333      28.872498      12.450761       0.306857       0.258000   -9999.000000   -9999.000000       1.000000
57554     57554     hunan          110.1600       29.3997          122       161     2012      08        22        235              0.305917      25.027466       0.000000       0.317953       0.217000       0.087700       0.160200   -9999.000000
57554     57554     hunan          110.1600       29.3997          122       161     2012      08        23        236              0.307167      24.254425       0.000000       0.287983   -9999.000000       0.072200       0.170000       0.427000
57554     57554     hunan          110.1600       29.3997          122       161     2012      08        24        237              0.304542      23.287262       0.000000       0.279857   -9999.000000   -9999.000000       0.174600       0.577000
57554     57554     hunan          110.1600       29.3997          122       161     2012      08        25        238              0.000000      24.664398       0.000000       0.274445       0.234000       0.062500       0.162600   -9999.000000
57554     57554     hunan          110.1600       29.3997          122       161     2012      08        26        239              0.293333      25.576752       0.201508       0.271120       0.242000       0.139500   -9999.000000       0.260000
57554     57554     hunan          110.1600       29.3997          122       161     2012      08        27        240              0.293458      25.475861       0.000000       0.270548       0.222000   -9999.000000   -9999.000000   -9999.000000
57554     57554     hunan          110.1600       29.3997          122       161     2012      08        28        241              0.291625      25.866425       0.626200       0.267989       0.197000       0.363300       0.135700       0.523000
57554     57554     hunan          110.1600       29.3997          122       161     2012      08        29        242              0.289042      25.673187       2.158681       0.267532   -9999.000000   -9999.000000       0.139700       0.611000
57554     57554     hunan          110.1600       29.3997          122       161     2012      08        30        243              0.286792      27.149231       2.862626       0.269758       0.229000       0.080400       0.135800   -9999.000000
57554     57554     hunan          110.1600       29.3997          122       161     2012      08        31        244              0.287583      25.948883       1.038042       0.276185       0.247000       0.141900       0.136900       0.437000
57554     57554     hunan          110.1600       29.3997          122       161     2012      09        01        245              0.293083      25.752289      14.057022       0.272784       0.246000   -9999.000000   -9999.000000   -9999.000000
57554     57554     hunan          110.1600       29.3997          122       161     2012      09        02        246              0.301625      25.900269      18.639727       0.298550       0.227000       0.154500   -9999.000000       0.942000
57554     57554     hunan          110.1600       29.3997          122       161     2012      09        03        247              0.305667      24.728241       0.481009       0.308915   -9999.000000   -9999.000000       0.162900   -9999.000000
57554     57554     hunan          110.1600       29.3997          122       161     2012      09        04        248              0.299875      24.372467       0.000000       0.286078   -9999.000000       0.060900       0.171600       0.435000
57554     57554     hunan          110.1600       29.3997          122       161     2012      09        05        249              0.299208      23.700378       0.055445       0.275975       0.229000       0.076400       0.168800       0.549000
57554     57554     hunan          110.1600       29.3997          122       161     2012      09        06        250              0.303250      23.658966       0.000000       0.271222       0.219500   -9999.000000   -9999.000000   -9999.000000
57554     57554     hunan          110.1600       29.3997          122       161     2012      09        07        251              0.303167      25.190125       0.871206       0.267686       0.225500       0.248200   -9999.000000       0.619000
57554     57554     hunan          110.1600       29.3997          122       161     2012      09        08        252              0.308542      26.404327      50.644798       0.266013       0.206000   -9999.000000       0.194300   -9999.000000
57554     57554     hunan          110.1600       29.3997          122       161     2012      09        09        253              0.319417      26.492554       1.221898       0.320492   -9999.000000       0.042000       0.194200       0.627000
57554     57554     hunan          110.1600       29.3997          122       161     2012      09        10        254              0.317458      23.913391       0.678290       0.303807       0.273000       0.099700       0.123500       0.712000
57554     57554     hunan          110.1600       29.3997          122       161     2012      09        11        255              0.314833      23.122681      23.569391       0.288841       0.217000   -9999.000000       0.118600   -9999.000000
57554     57554     hunan          110.1600       29.3997          122       161     2012      09        12        256              0.329208      23.559204      62.870098       0.300246   -9999.000000       0.055200   -9999.000000       1.000000
57554     57554     hunan          110.1600       29.3997          122       161     2012      09        13        257              0.321000      21.061340       0.207097       0.403405       0.192000       0.205500   -9999.000000   -9999.000000
57554     57554     hunan          110.1600       29.3997          122       161     2012      09        14        258              0.311917      21.701050       0.000000       0.347066   -9999.000000       0.051500       0.114500       0.473000
57554     57554     hunan          110.1600       29.3997          122       161     2012      09        15        259              0.303375      21.543427       0.000000       0.310365       0.202000       0.204200       0.113700   -9999.000000
57554     57554     hunan          110.1600       29.3997          122       161     2012      09        16        260              0.299292      20.982697       0.159028       0.298588       0.218500   -9999.000000       0.118300   -9999.000000
57554     57554     hunan          110.1600       29.3997          122       161     2012      09        17        261              0.296750      20.019165       0.367370       0.294117       0.201000       0.155800       0.166300       0.463000
57554     57554     hunan          110.1600       29.3997          122       161     2012      09        18        262              0.301333      20.902740       0.000000       0.288944       0.193000       0.186500   -9999.000000   -9999.000000
57554     57554     hunan          110.1600       29.3997          122       161     2012      09        19        263              0.300833      21.767059       0.000000       0.283968   -9999.000000   -9999.000000   -9999.000000       0.403000
57554     57554     hunan          110.1600       29.3997          122       161     2012      09        20        264              0.299958      22.737762       4.677809       0.278975   -9999.000000       0.148000       0.177500   -9999.000000
57554     57554     hunan          110.1600       29.3997          122       161     2012      09        21        265              0.304125      22.510986       1.148813       0.284707   -9999.000000   -9999.000000       0.172500       0.730000
57554     57554     hunan          110.1600       29.3997          122       161     2012      09        22        266              0.307083      21.190460       1.292527       0.285975       0.193000       0.218100       0.172300       0.384000
57554     57554     hunan          110.1600       29.3997          122       161     2012      09        23        267              0.308583      22.447937       3.023389       0.281201       0.204000       0.159300   -9999.000000   -9999.000000
57554     57554     hunan          110.1600       29.3997          122       161     2012      09        24        268              0.311250      21.748932       0.257264       0.284984       0.187000   -9999.000000   -9999.000000       0.413000
57554     57554     hunan          110.1600       29.3997          122       161     2012      09        25        269              0.302250      22.109802       0.123409       0.279420   -9999.000000       0.068000       0.130100   -9999.000000
57554     57554     hunan          110.1600       29.3997          122       161     2012      09        26        270              0.301833      21.483795       0.838457       0.277554       0.197000   -9999.000000       0.126300       0.764000
57554     57554     hunan          110.1600       29.3997          122       161     2012      09        27        271              0.312143      21.432404       0.000000       0.278290       0.186500       0.080100       0.125800       0.527000
57554     57554     hunan          110.1600       29.3997          122       161     2012      09        28        272              0.306400      21.909821       0.319535       0.275227       0.188000   -9999.000000       0.121000   -9999.000000
57554     57554     hunan          110.1600       29.3997          122       161     2012      09        29        273              0.302792      21.540131       0.087915       0.271380       0.176000   -9999.000000   -9999.000000       0.255000
57554     57554     hunan          110.1600       29.3997          122       161     2012      09        30        274              0.301000      20.902100       0.162449       0.268987   -9999.000000   -9999.000000   -9999.000000   -9999.000000
57554     57554     hunan          110.1600       29.3997          122       161     2012      10        01        275              0.299792      19.594666       0.000000       0.268660   -9999.000000   -9999.000000       0.160100       0.269000
57554     57554     hunan          110.1600       29.3997          122       161     2012      10        02        276              0.293333      20.213196       0.472463       0.265804       0.162000       0.088000       0.175600   -9999.000000
57554     57554     hunan          110.1600       29.3997          122       161     2012      10        03        277              0.287958      19.601318       2.075522       0.266437       0.159000       0.143400       0.172700       0.406000
57554     57554     hunan          110.1600       29.3997          122       161     2012      10        04        278              0.304042      18.228424       7.112627       0.272783       0.186000   -9999.000000   -9999.000000       0.498000
57554     57554     hunan          110.1600       29.3997          122       161     2012      10        05        279              0.312833      17.304657       7.994473       0.284551       0.200000   -9999.000000   -9999.000000   -9999.000000
57554     57554     hunan          110.1600       29.3997          122       161     2012      10        06        280              0.316208      17.052216       0.188906       0.294124   -9999.000000       0.069300   -9999.000000       0.470000
57554     57554     hunan          110.1600       29.3997          122       161     2012      10        07        281              0.318000      17.741730       6.995710       0.279286       0.194000   -9999.000000       0.181400   -9999.000000
57554     57554     hunan          110.1600       29.3997          122       161     2012      10        08        282              0.323292      16.872162       2.779274       0.285438       0.192500       0.146400       0.080300       0.720000
57554     57554     hunan          110.1600       29.3997          122       161     2012      10        09        283              0.324167      16.833984       0.000000       0.287640       0.165000   -9999.000000       0.080400       0.643000
57554     57554     hunan          110.1600       29.3997          122       161     2012      10        10        284              0.316208      18.725281       0.000000       0.276533       0.156000       0.269700   -9999.000000   -9999.000000
57554     57554     hunan          110.1600       29.3997          122       161     2012      10        11        285              0.308583      18.659088       0.000000       0.271530   -9999.000000       0.283800   -9999.000000       0.462000
57554     57554     hunan          110.1600       29.3997          122       161     2012      10        12        286              0.309917      17.434052       7.836582       0.270349       0.127000   -9999.000000       0.087400   -9999.000000
57554     57554     hunan          110.1600       29.3997          122       161     2012      10        13        287              0.322708      16.803772       0.855233       0.280154       0.131500       0.082500       0.081800       0.627000
57554     57554     hunan          110.1600       29.3997          122       161     2012      10        14        288              0.325083      16.436157       4.097392       0.284441       0.131000   -9999.000000       0.083700   -9999.000000
57554     57554     hunan          110.1600       29.3997          122       161     2012      10        15        289              0.328375      17.244446      17.943815       0.280260       0.146000       0.106900       0.191800   -9999.000000
57554     57554     hunan          110.1600       29.3997          122       161     2012      10        16        290              0.333958      16.621765       2.151787       0.295510       0.157000       0.162800   -9999.000000       0.820000
57554     57554     hunan          110.1600       29.3997          122       161     2012      10        17        291              0.321208      16.901703       0.000000       0.298633   -9999.000000   -9999.000000   -9999.000000   -9999.000000
57554     57554     hunan          110.1600       29.3997          122       161     2012      10        18        292              0.320917      17.121277       0.000000       0.280175       0.118000       0.074600       0.173800       0.369000
57554     57554     hunan          110.1600       29.3997          122       161     2012      10        19        293              0.321167      17.133148       0.000000       0.274742       0.126000       0.217700       0.168400   -9999.000000
57554     57554     hunan          110.1600       29.3997          122       161     2012      10        20        294              0.325792      17.162994      10.125429       0.273138       0.127000       0.165800       0.179800       0.393000
57554     57554     hunan          110.1600       29.3997          122       161     2012      10        21        295              0.332583      17.650696       0.816730       0.285326       0.214000       0.140400   -9999.000000       0.580000
57554     57554     hunan          110.1600       29.3997          122       161     2012      10        22        296              0.330250      18.660248       1.076824       0.287010   -9999.000000   -9999.000000   -9999.000000   -9999.000000
57554     57554     hunan          110.1600       29.3997          122       161     2012      10        23        297              0.328833      16.384369       4.500409       0.281568   -9999.000000       0.435900       0.070400       0.282000
57554     57554     hunan          110.1600       29.3997          122       161     2012      10        24        298              0.323292      15.748627       1.225767       0.280218   -9999.000000       0.332000       0.065400   -9999.000000
57554     57554     hunan          110.1600       29.3997          122       161     2012      10        25        299              0.000000      14.892059       9.801799       0.285181       0.229000   -9999.000000       0.069400       0.651000
57554     57554     hunan          110.1600       29.3997          122       161     2012      10        26        300              0.333833      14.885559       5.033790       0.294530       0.218000       0.061400       0.069000       0.866000
57554     57554     hunan          110.1600       29.3997          122       161     2012      10        27        301              0.328583      16.089844       0.114597       0.295626   -9999.000000   -9999.000000   -9999.000000   -9999.000000
57554     57554     hunan          110.1600       29.3997          122       161     2012      10        28        302              0.000000      16.370575       1.253320       0.282296   -9999.000000       0.140000   -9999.000000       0.367000
57554     57554     hunan          110.1600       29.3997          122       161     2012      10        29        303              0.333417      17.308014       3.317824       0.279418       0.227000       0.270500       0.148200   -9999.000000
57554     57554     hunan          110.1600       29.3997          122       161     2012      10        30        304              0.324333      16.172485       0.000000       0.285885       0.211500   -9999.000000       0.150300       0.280000
57554     57554     hunan          110.1600       29.3997          122       161     2012      10        31        305              0.322167      15.962555       0.000000       0.278553       0.203500       0.242300       0.139700   -9999.000000
57554     57554     hunan          110.1600       29.3997          122       161     2012      11        01        306              0.326708      16.095032       0.077881       0.275084       0.135000   -9999.000000       0.144200       0.328000
57554     57554     hunan          110.1600       29.3997          122       161     2012      11        02        307              0.326708      15.485687       1.022413       0.273829   -9999.000000       0.220800   -9999.000000       0.452000
57554     57554     hunan          110.1600       29.3997          122       161     2012      11        03        308              0.325333      16.580627       0.391150       0.273164       0.149000       0.330500   -9999.000000   -9999.000000
57554     57554     hunan          110.1600       29.3997          122       161     2012      11        04        309              0.325500      14.654114       0.063206       0.275923       0.144000   -9999.000000       0.145200       0.361000
57554     57554     hunan          110.1600       29.3997          122       161     2012      11        05        310              0.322292      15.128448       4.781755       0.272805       0.150500       0.034200       0.053400   -9999.000000
57554     57554     hunan          110.1600       29.3997          122       161     2012      11        06        311              0.328708      13.622955       0.246223       0.282207       0.142000       0.127800       0.053900       0.342000
57554     57554     hunan          110.1600       29.3997          122       161     2012      11        07        312              0.325000      14.202789       2.997084       0.277518   -9999.000000       0.103200   -9999.000000       0.519000
57554     57554     hunan          110.1600       29.3997          122       161     2012      11        08        313              0.335500      12.780945       4.511879       0.280137       0.169000   -9999.000000   -9999.000000   -9999.000000
57554     57554     hunan          110.1600       29.3997          122       161     2012      11        09        314              0.335208      12.245636       0.570307       0.282519       0.180000   -9999.000000       0.055000       0.402000
57554     57554     hunan          110.1600       29.3997          122       161     2012      11        10        315              0.334167      11.431122       0.131736       0.283221       0.160000       0.168100       0.055100   -9999.000000
57554     57554     hunan          110.1600       29.3997          122       161     2012      11        11        316              0.329917      12.029816       0.000000       0.276843       0.164000       0.207600       0.053700       0.307000
57554     57554     hunan          110.1600       29.3997          122       161     2012      11        12        317              0.330042      11.703979       0.000000       0.274469       0.162000   -9999.000000       0.138900   -9999.000000
57554     57554     hunan          110.1600       29.3997          122       161     2012      11        13        318              0.000000      11.605438       0.000000       0.273113   -9999.000000       0.246500   -9999.000000   -9999.000000
57554     57554     hunan          110.1600       29.3997          122       161     2012      11        14        319              0.332875      12.980652       7.170819       0.271310       0.171000   -9999.000000   -9999.000000       0.352000
57554     57554     hunan          110.1600       29.3997          122       161     2012      11        15        320              0.338958      12.667145      10.197501       0.277754       0.182000       0.261400       0.140200   -9999.000000
57554     57554     hunan          110.1600       29.3997          122       161     2012      11        16        321              0.337667      11.608612       2.893161       0.297824       0.173500       0.164600       0.140400       0.405000
57554     57554     hunan          110.1600       29.3997          122       161     2012      11        17        322              0.000000      10.337250       0.836852       0.292460       0.157000   -9999.000000       0.139600   -9999.000000
57554     57554     hunan          110.1600       29.3997          122       161     2012      11        18        323              0.331000      11.742798       0.303289       0.279688   -9999.000000       0.215700   -9999.000000       0.267000
57554     57554     hunan          110.1600       29.3997          122       161     2012      11        19        324              0.331417      12.076263       0.358020       0.275646       0.170000   -9999.000000   -9999.000000       0.296000
57554     57554     hunan          110.1600       29.3997          122       161     2012      11        20        325              0.337625      11.596954       4.495736       0.275225       0.190500       0.278300   -9999.000000   -9999.000000
57554     57554     hunan          110.1600       29.3997          122       161     2012      11        21        326              0.336667      10.592590       1.270300       0.283641       0.183500       0.427400       0.055900       0.326000
57554     57554     hunan          110.1600       29.3997          122       161     2012      11        22        327              0.336417      10.455261       1.290771       0.280633       0.188000   -9999.000000       0.057000   -9999.000000
57554     57554     hunan          110.1600       29.3997          122       161     2012      11        23        328              0.334792      10.133820       0.000000       0.280928   -9999.000000       0.117500       0.058300       0.189000
57554     57554     hunan          110.1600       29.3997          122       161     2012      11        24        329              0.333708       9.151123       2.354612       0.276656   -9999.000000       0.298200   -9999.000000       0.205000
57554     57554     hunan          110.1600       29.3997          122       161     2012      11        25        330              0.336208       8.220795       2.347676       0.278203       0.168000       0.047400   -9999.000000   -9999.000000
57554     57554     hunan          110.1600       29.3997          122       161     2012      11        26        331              0.336250       8.635071       0.000000       0.281710       0.173000       0.146500   -9999.000000       0.015000
57554     57554     hunan          110.1600       29.3997          122       161     2012      11        27        332              0.334000       8.709473       0.192915       0.277498       0.178500   -9999.000000       0.057100   -9999.000000
57554     57554     hunan          110.1600       29.3997          122       161     2012      11        28        333              0.333667       8.191437       0.286488       0.275173       0.172000       0.097000       0.053100       0.221000
57554     57554     hunan          110.1600       29.3997          122       161     2012      11        29        334              0.332875       8.453369       0.474539       0.273654   -9999.000000       0.091600       0.060400   -9999.000000
57554     57554     hunan          110.1600       29.3997          122       161     2012      11        30        335              0.332000       6.948547       0.979655       0.273882       0.197000   -9999.000000   -9999.000000       0.110000
57554     57554     hunan          110.1600       29.3997          122       161     2012      12        01        336              0.332708       6.803345       0.149752       0.274659       0.129000       0.041000   -9999.000000       0.368000
57554     57554     hunan          110.1600       29.3997          122       161     2012      12        02        337              0.332875       7.340790       0.000000       0.274859       0.125000   -9999.000000       0.056300   -9999.000000
57554     57554     hunan          110.1600       29.3997          122       161     2012      12        03        338              0.332500       7.614532      10.397096       0.272595       0.118000       0.149000       0.067700       0.186000
57554     57554     hunan          110.1600       29.3997          122       161     2012      12        04        339              0.330875       8.181061       0.000000       0.271031   -9999.000000       0.233400       0.071100   -9999.000000
57554     57554     hunan          110.1600       29.3997          122       161     2012      12        05        340              0.330875       6.869019       0.000000       0.270626   -9999.000000   -9999.000000   -9999.000000       0.137000
57554     57554     hunan          110.1600       29.3997          122       161     2012      12        06        341              0.330583       7.813416       6.934403       0.269296       0.123000       0.173300   -9999.000000       0.281000
57554     57554     hunan          110.1600       29.3997          122       161     2012      12        07        342              0.330417       7.160706       0.303143       0.284519       0.122000   -9999.000000       0.066600   -9999.000000
57554     57554     hunan          110.1600       29.3997          122       161     2012      12        08        343              0.329750       8.039337       0.000000       0.276753       0.121500       0.189300       0.064200       0.300000
57554     57554     hunan          110.1600       29.3997          122       161     2012      12        09        344              0.328958       8.785797       0.105482       0.272286       0.130000       0.293400       0.070500   -9999.000000
57554     57554     hunan          110.1600       29.3997          122       161     2012      12        10        345              0.329542       6.614288       0.710585       0.270845   -9999.000000   -9999.000000       0.049200       0.012000
57554     57554     hunan          110.1600       29.3997          122       161     2012      12        11        346              0.329292       5.468201       0.228776       0.271817       0.148000       0.105500   -9999.000000   -9999.000000
57554     57554     hunan          110.1600       29.3997          122       161     2012      12        12        347              0.329375       5.990021       2.978620       0.270245       0.170500   -9999.000000   -9999.000000   -9999.000000
57554     57554     hunan          110.1600       29.3997          122       161     2012      12        13        348              0.330083       5.307617       1.808740       0.274181       0.168000       0.144100       0.050300       0.290000
57554     57554     hunan          110.1600       29.3997          122       161     2012      12        14        349              0.330833       5.540161       0.800069       0.279485       0.164000   -9999.000000       0.048200   -9999.000000
57554     57554     hunan          110.1600       29.3997          122       161     2012      12        15        350              0.000000       5.531708       0.000000       0.276305   -9999.000000   -9999.000000       0.049100       0.166000
57554     57554     hunan          110.1600       29.3997          122       161     2012      12        16        351              0.329542       5.923401       0.249347       0.272173       0.157000       0.099600       0.047600   -9999.000000
57554     57554     hunan          110.1600       29.3997          122       161     2012      12        17        352              0.333750       5.679382       5.117343       0.270785       0.177000       0.046700   -9999.000000       0.144000
57554     57554     hunan          110.1600       29.3997          122       161     2012      12        18        353              0.334042       4.524445       0.545374       0.283864   -9999.000000   -9999.000000   -9999.000000       0.033000
57554     57554     hunan          110.1600       29.3997          122       161     2012      12        19        354              0.334708       4.588531       0.929245       0.274333       0.177000       0.096800       0.048200   -9999.000000
57554     57554     hunan          110.1600       29.3997          122       161     2012      12        20        355              0.000000       3.074280       0.332363       0.273517   -9999.000000   -9999.000000       0.046000       0.136000
57554     57554     hunan          110.1600       29.3997          122       161     2012      12        21        356              0.333833       2.702820       0.419037       0.272325   -9999.000000       0.099700       0.045400   -9999.000000
57554     57554     hunan          110.1600       29.3997          122       161     2012      12        22        357              0.332667       3.122498       0.392674       0.271460   -9999.000000       0.331200   -9999.000000       0.238000
57554     57554     hunan          110.1600       29.3997          122       161     2012      12        23        358              0.332000       2.821594       0.846181       0.269265   -9999.000000   -9999.000000   -9999.000000       0.059000
57554     57554     hunan          110.1600       29.3997          122       161     2012      12        24        359              0.331722       2.338531       1.172470       0.265300       0.122000       0.119100       0.054900   -9999.000000
57554     57554     hunan          110.1600       29.3997          122       161     2012      12        25        360              0.330417       3.572327       0.000000       0.269106       0.137000   -9999.000000       0.057300       0.034000
57554     57554     hunan          110.1600       29.3997          122       161     2012      12        26        361              0.000000       2.494629       0.528687       0.267752   -9999.000000       0.183600       0.054300   -9999.000000
57554     57554     hunan          110.1600       29.3997          122       161     2012      12        27        362              0.332750       1.673981       0.288534       0.264747   -9999.000000   -9999.000000       0.056300   -9999.000000
57554     57554     hunan          110.1600       29.3997          122       161     2012      12        28        363              0.333000       1.756348       3.740129       0.263054       0.148000   -9999.000000   -9999.000000   -9999.000000
57554     57554     hunan          110.1600       29.3997          122       161     2012      12        29        364              0.000000       1.838348       4.268084       0.267034   -9999.000000   -9999.000000   -9999.000000       0.109000
57554     57554     hunan          110.1600       29.3997          122       161     2012      12        30        365              0.000000       1.392609       2.233086       0.274464   -9999.000000   -9999.000000       0.051100       0.194000
57554     57554     hunan          110.1600       29.3997          122       161     2012      12        31        366              0.334533       2.235199       1.422802       0.266125   -9999.000000       0.018500       0.065600   -9999.000000
