# Supplementary material for: Research on Fusing Multisatellite Soil Moisture Data Based on Bayesian Model Averaging
Source: Hindawi journal article supplement (doi:10.1155/2018/9310838), 2018-06-25
Supplement: f1 [file 9310838.f1.zip › 2012_sm00-10cm_daily_ZDB_ZHY_57564_366days_allin.txt]

57564     57564     hunan          111.1297       29.4300          122       165     2012      01        01        001              0.000000   -9999.000000       0.000000   -9999.000000       0.103000   -9999.000000       0.066500   -9999.000000
57564     57564     hunan          111.1297       29.4300          122       165     2012      01        02        002              0.000000       5.264862       1.174345       0.339528       0.109000       0.160300   -9999.000000       0.005000
57564     57564     hunan          111.1297       29.4300          122       165     2012      01        03        003              0.000000       3.202637       0.980195       0.341813   -9999.000000   -9999.000000   -9999.000000   -9999.000000
57564     57564     hunan          111.1297       29.4300          122       165     2012      01        04        004              0.000000       1.735443       0.000000       0.323194   -9999.000000       0.156600       0.087200   -9999.000000
57564     57564     hunan          111.1297       29.4300          122       165     2012      01        05        005              0.000000       2.236053       0.000000       0.327419   -9999.000000       0.177500       0.085000       0.049000
57564     57564     hunan          111.1297       29.4300          122       165     2012      01        06        006              0.000000       1.731659       0.000000       0.315018       0.111000   -9999.000000       0.079900   -9999.000000
57564     57564     hunan          111.1297       29.4300          122       165     2012      01        07        007              0.000000       3.615906       0.000000       0.330047       0.102000       0.222200       0.084100       0.039000
57564     57564     hunan          111.1297       29.4300          122       165     2012      01        08        008              0.000000       2.402466       0.000000       0.329306       0.102000       0.051100   -9999.000000   -9999.000000
57564     57564     hunan          111.1297       29.4300          122       165     2012      01        09        009              0.000000       1.925262       0.000000       0.325903   -9999.000000       0.106300   -9999.000000       0.057000
57564     57564     hunan          111.1297       29.4300          122       165     2012      01        10        010              0.000000       2.480682       0.000000       0.329942   -9999.000000       0.106100       0.052900       0.093000
57564     57564     hunan          111.1297       29.4300          122       165     2012      01        11        011              0.000000       2.573364       0.000000       0.331140       0.115000   -9999.000000       0.057200   -9999.000000
57564     57564     hunan          111.1297       29.4300          122       165     2012      01        12        012              0.000000       3.076752       0.000000       0.330497       0.112500       0.101500       0.054900       0.027000
57564     57564     hunan          111.1297       29.4300          122       165     2012      01        13        013              0.000000       2.493988       1.960063       0.329736       0.107000       0.153300   -9999.000000   -9999.000000
57564     57564     hunan          111.1297       29.4300          122       165     2012      01        14        014              0.000000       2.373871       9.720576       0.331056   -9999.000000   -9999.000000   -9999.000000       0.015000
57564     57564     hunan          111.1297       29.4300          122       165     2012      01        15        015              0.000000       2.189514       2.901753       0.337374   -9999.000000       0.109800   -9999.000000       0.355000
57564     57564     hunan          111.1297       29.4300          122       165     2012      01        16        016              0.000000       1.409302       0.170117       0.345135       0.121500   -9999.000000       0.052700   -9999.000000
57564     57564     hunan          111.1297       29.4300          122       165     2012      01        17        017              0.000000       2.907715       3.266118       0.345420       0.114000       0.093800       0.054800       0.110000
57564     57564     hunan          111.1297       29.4300          122       165     2012      01        18        018              0.000000       2.841858       2.340560       0.340916   -9999.000000       0.331700       0.050400   -9999.000000
57564     57564     hunan          111.1297       29.4300          122       165     2012      01        19        019              0.000000       2.991394       0.480678       0.342938   -9999.000000   -9999.000000   -9999.000000       0.348000
57564     57564     hunan          111.1297       29.4300          122       165     2012      01        20        020              0.000000       2.326752       4.005242       0.339666   -9999.000000       0.087500   -9999.000000   -9999.000000
57564     57564     hunan          111.1297       29.4300          122       165     2012      01        21        021              0.000000       2.174286       1.286842       0.336574   -9999.000000   -9999.000000       0.047500       0.215000
57564     57564     hunan          111.1297       29.4300          122       165     2012      01        22        022              0.000000       0.886841       3.967439       0.308741   -9999.000000   -9999.000000       0.044500       0.075000
57564     57564     hunan          111.1297       29.4300          122       165     2012      01        23        023              0.000000       0.220123       1.456386       0.255326   -9999.000000       0.086200       0.049900   -9999.000000
57564     57564     hunan          111.1297       29.4300          122       165     2012      01        24        024              0.000000       0.588104       0.384180       0.256083   -9999.000000   -9999.000000   -9999.000000       0.075000
57564     57564     hunan          111.1297       29.4300          122       165     2012      01        25        025              0.000000       1.258820       1.379604       0.282548   -9999.000000       0.076500   -9999.000000   -9999.000000
57564     57564     hunan          111.1297       29.4300          122       165     2012      01        26        026              0.000000       2.662781       0.000000       0.312769   -9999.000000       0.221100   -9999.000000       0.222000
57564     57564     hunan          111.1297       29.4300          122       165     2012      01        27        027              0.000000       3.075867       0.000000       0.331024       0.104000       0.093900       0.051400   -9999.000000
57564     57564     hunan          111.1297       29.4300          122       165     2012      01        28        028              0.000000       2.865631       0.000000       0.334196       0.105000       0.067700       0.047100   -9999.000000
57564     57564     hunan          111.1297       29.4300          122       165     2012      01        29        029              0.000000       4.228302       0.000000       0.334756       0.098000   -9999.000000       0.049600       0.230000
57564     57564     hunan          111.1297       29.4300          122       165     2012      01        30        030              0.000000       4.754791       0.000000       0.334514   -9999.000000       0.177600   -9999.000000   -9999.000000
57564     57564     hunan          111.1297       29.4300          122       165     2012      01        31        031              0.000000       4.036133       0.000000       0.333735   -9999.000000       0.164200   -9999.000000       0.095000
57564     57564     hunan          111.1297       29.4300          122       165     2012      02        01        032              0.000000       7.240936       0.000000       0.332722       0.116000   -9999.000000       0.069600   -9999.000000
57564     57564     hunan          111.1297       29.4300          122       165     2012      02        02        033              0.000000       4.237671       0.000000       0.332330   -9999.000000       0.219000       0.069000   -9999.000000
57564     57564     hunan          111.1297       29.4300          122       165     2012      02        03        034              0.000000       2.431061       0.000000       0.320612       0.101000   -9999.000000       0.073600       0.111000
57564     57564     hunan          111.1297       29.4300          122       165     2012      02        04        035              0.000000       5.700928       0.000000       0.327722   -9999.000000       0.186700       0.069100   -9999.000000
57564     57564     hunan          111.1297       29.4300          122       165     2012      02        05        036              0.000000       4.930084       1.209940       0.330714       0.127000       0.123200   -9999.000000       0.165000
57564     57564     hunan          111.1297       29.4300          122       165     2012      02        06        037              0.000000       3.453278       0.142574       0.333170       0.119500   -9999.000000   -9999.000000   -9999.000000
57564     57564     hunan          111.1297       29.4300          122       165     2012      02        07        038              0.000000       3.724792       0.000000       0.331681   -9999.000000       0.100700       0.046100       0.062000
57564     57564     hunan          111.1297       29.4300          122       165     2012      02        08        039              0.000000       3.087860       0.000000       0.321158   -9999.000000   -9999.000000       0.048200       0.129000
57564     57564     hunan          111.1297       29.4300          122       165     2012      02        09        040              0.000000       2.789093       0.000000       0.317328   -9999.000000       0.078400       0.044300   -9999.000000
57564     57564     hunan          111.1297       29.4300          122       165     2012      02        10        041              0.000000       1.674683       0.000000       0.304010   -9999.000000       0.108300       0.045200       0.024000
57564     57564     hunan          111.1297       29.4300          122       165     2012      02        11        042              0.000000       3.430878       0.662823       0.314901       0.144000   -9999.000000   -9999.000000   -9999.000000
57564     57564     hunan          111.1297       29.4300          122       165     2012      02        12        043              0.000000       4.578552       0.501957       0.324375   -9999.000000       0.146500   -9999.000000       0.001000
57564     57564     hunan          111.1297       29.4300          122       165     2012      02        13        044              0.000000       3.988281       0.255679       0.326827       0.136000       0.091200   -9999.000000       0.163000
57564     57564     hunan          111.1297       29.4300          122       165     2012      02        14        045              0.000000       3.306763       0.320787       0.327252       0.134000   -9999.000000       0.054000   -9999.000000
57564     57564     hunan          111.1297       29.4300          122       165     2012      02        15        046              0.000000       3.400574       0.610816       0.327479   -9999.000000       0.053200       0.056900       0.100000
57564     57564     hunan          111.1297       29.4300          122       165     2012      02        16        047              0.000000       3.220734       0.000000       0.326309       0.136000   -9999.000000   -9999.000000   -9999.000000
57564     57564     hunan          111.1297       29.4300          122       165     2012      02        17        048              0.000000       4.719818       0.000000       0.326461       0.111000       0.076000   -9999.000000       0.045000
57564     57564     hunan          111.1297       29.4300          122       165     2012      02        18        049              0.000000       5.372314       0.000000       0.324271       0.111000   -9999.000000       0.050500   -9999.000000
57564     57564     hunan          111.1297       29.4300          122       165     2012      02        19        050              0.000000       4.804474       0.624871       0.322940       0.103000       0.113800       0.051600       0.033000
57564     57564     hunan          111.1297       29.4300          122       165     2012      02        20        051              0.000000       7.455109       0.000000       0.322213   -9999.000000       0.108400       0.043900       0.026000
57564     57564     hunan          111.1297       29.4300          122       165     2012      02        21        052              0.000000       6.234558       2.259839       0.323274       0.100000   -9999.000000   -9999.000000   -9999.000000
57564     57564     hunan          111.1297       29.4300          122       165     2012      02        22        053              0.000000       5.806000       0.243893       0.326931       0.088500       0.193400   -9999.000000       0.227000
57564     57564     hunan          111.1297       29.4300          122       165     2012      02        23        054              0.000000       7.107056       0.127615       0.329133       0.094000       0.056200   -9999.000000   -9999.000000
57564     57564     hunan          111.1297       29.4300          122       165     2012      02        24        055              0.000000       6.176666       0.000000       0.326899       0.088000   -9999.000000       0.043800       0.077000
57564     57564     hunan          111.1297       29.4300          122       165     2012      02        25        056              0.000000       3.977264       0.218271       0.325629   -9999.000000       0.127200       0.041200       0.165000
57564     57564     hunan          111.1297       29.4300          122       165     2012      02        26        057              0.000000       2.641479       0.183902       0.318089   -9999.000000   -9999.000000       0.041200   -9999.000000
57564     57564     hunan          111.1297       29.4300          122       165     2012      02        27        058              0.000000       2.886292       0.342242       0.319454   -9999.000000   -9999.000000   -9999.000000       0.157000
57564     57564     hunan          111.1297       29.4300          122       165     2012      02        28        059              0.000000       2.196686       0.225370       0.318092       0.088500       0.219900   -9999.000000   -9999.000000
57564     57564     hunan          111.1297       29.4300          122       165     2012      02        29        060              0.000000   -9999.000000       0.000000   -9999.000000       0.085500   -9999.000000   -9999.000000   -9999.000000
57564     57564     hunan          111.1297       29.4300          122       165     2012      03        01        061              0.000000       3.829681       0.000000       0.323976       0.117000       0.163500       0.041700   -9999.000000
57564     57564     hunan          111.1297       29.4300          122       165     2012      03        02        062              0.000000       5.423370       5.007206       0.324855   -9999.000000   -9999.000000       0.050700   -9999.000000
57564     57564     hunan          111.1297       29.4300          122       165     2012      03        03        063              0.000000       4.507141       3.042528       0.330140   -9999.000000       0.110600       0.047800       0.508000
57564     57564     hunan          111.1297       29.4300          122       165     2012      03        04        064              0.000000       3.824188       0.240425       0.339103       0.125000       0.165900   -9999.000000   -9999.000000
57564     57564     hunan          111.1297       29.4300          122       165     2012      03        05        065              0.000000       3.429047       0.547976       0.331685       0.111000   -9999.000000   -9999.000000       0.056000
57564     57564     hunan          111.1297       29.4300          122       165     2012      03        06        066              0.000000       5.798553       0.655947       0.328603       0.120000       0.108900       0.051900   -9999.000000
57564     57564     hunan          111.1297       29.4300          122       165     2012      03        07        067              0.000000       5.311523       4.856816       0.328411   -9999.000000       0.124900       0.053800       0.268000
57564     57564     hunan          111.1297       29.4300          122       165     2012      03        08        068              0.000000       4.803497       3.403260       0.333773   -9999.000000       0.298600       0.052600       0.312000
57564     57564     hunan          111.1297       29.4300          122       165     2012      03        09        069              0.000000       4.079651       1.206132       0.337408   -9999.000000       0.159100       0.051900   -9999.000000
57564     57564     hunan          111.1297       29.4300          122       165     2012      03        10        070              0.000000       4.205048       0.000000       0.338857       0.111000   -9999.000000   -9999.000000       0.129000
57564     57564     hunan          111.1297       29.4300          122       165     2012      03        11        071              0.000000       8.461945       0.000000       0.329600       0.087000       0.060200   -9999.000000   -9999.000000
57564     57564     hunan          111.1297       29.4300          122       165     2012      03        12        072              0.000000       7.704315       0.000000       0.327102   -9999.000000       0.133300       0.059900       0.241000
57564     57564     hunan          111.1297       29.4300          122       165     2012      03        13        073              0.000000       7.409973       0.000000       0.325761       0.102000   -9999.000000       0.055300       0.305000
57564     57564     hunan          111.1297       29.4300          122       165     2012      03        14        074              0.000000      11.790649       0.329545       0.322009       0.103000       0.074400   -9999.000000   -9999.000000
57564     57564     hunan          111.1297       29.4300          122       165     2012      03        15        075              0.000000      10.097351       0.000000       0.322910       0.101500   -9999.000000       0.063500       0.115000
57564     57564     hunan          111.1297       29.4300          122       165     2012      03        16        076              0.000000      10.010895       0.241972       0.324101       0.102500       0.154600   -9999.000000   -9999.000000
57564     57564     hunan          111.1297       29.4300          122       165     2012      03        17        077              0.000000       9.938873       0.000000       0.323779   -9999.000000       0.165200   -9999.000000       0.180000
57564     57564     hunan          111.1297       29.4300          122       165     2012      03        18        078              0.000000      13.738007       1.249378       0.321663   -9999.000000   -9999.000000       0.062900   -9999.000000
57564     57564     hunan          111.1297       29.4300          122       165     2012      03        19        079              0.000000      14.096344       0.113486       0.323590       0.114000       0.087700       0.076300       0.070000
57564     57564     hunan          111.1297       29.4300          122       165     2012      03        20        080              0.000000       8.771881       0.229344       0.323867       0.108000   -9999.000000       0.074800       0.062000
57564     57564     hunan          111.1297       29.4300          122       165     2012      03        21        081              0.000000       6.616730      16.780708       0.323724       0.120000       0.125600   -9999.000000   -9999.000000
57564     57564     hunan          111.1297       29.4300          122       165     2012      03        22        082              0.000000       7.270050      25.509979       0.341221       0.127000       0.241900   -9999.000000       0.573000
57564     57564     hunan          111.1297       29.4300          122       165     2012      03        23        083              0.000000       6.518921       0.000000       0.373308   -9999.000000   -9999.000000       0.070400   -9999.000000
57564     57564     hunan          111.1297       29.4300          122       165     2012      03        24        084              0.000000      12.126373       0.000000       0.347690       0.114000       0.379600       0.066500       0.201000
57564     57564     hunan          111.1297       29.4300          122       165     2012      03        25        085              0.000000      14.084564       0.000000       0.335474       0.093500   -9999.000000       0.068600       0.546000
57564     57564     hunan          111.1297       29.4300          122       165     2012      03        26        086              0.000000      16.094147       3.084275       0.329564       0.090000       0.183200       0.075400   -9999.000000
57564     57564     hunan          111.1297       29.4300          122       165     2012      03        27        087              0.000000      17.121521       0.178017       0.325519       0.086000       0.126500   -9999.000000       0.363000
57564     57564     hunan          111.1297       29.4300          122       165     2012      03        28        088              0.000000      18.341919       1.766942       0.323957   -9999.000000   -9999.000000   -9999.000000   -9999.000000
57564     57564     hunan          111.1297       29.4300          122       165     2012      03        29        089              0.000000      16.161469      13.673730       0.328315   -9999.000000       0.098700       0.084500       0.896000
57564     57564     hunan          111.1297       29.4300          122       165     2012      03        30        090              0.000000      16.718018       0.663314       0.344900       0.103500       0.131600       0.088700   -9999.000000
57564     57564     hunan          111.1297       29.4300          122       165     2012      03        31        091              0.000000      14.954742       0.000000       0.343915       0.092000   -9999.000000       0.080500   -9999.000000
57564     57564     hunan          111.1297       29.4300          122       165     2012      04        01        092              0.000000      17.372620       0.000000       0.330830       0.106000       0.108400   -9999.000000       0.488000
57564     57564     hunan          111.1297       29.4300          122       165     2012      04        02        093              0.000000      19.032013       0.000000       0.324858   -9999.000000   -9999.000000   -9999.000000   -9999.000000
57564     57564     hunan          111.1297       29.4300          122       165     2012      04        03        094              0.000000      20.346954       0.107192       0.320600       0.133000       0.206400   -9999.000000       0.154000
57564     57564     hunan          111.1297       29.4300          122       165     2012      04        04        095              0.000000      15.850189      10.253897       0.320936       0.155000       0.176000       0.086100   -9999.000000
57564     57564     hunan          111.1297       29.4300          122       165     2012      04        05        096              0.000000      12.477875       0.266410       0.345617       0.121500   -9999.000000       0.078100       0.383000
57564     57564     hunan          111.1297       29.4300          122       165     2012      04        06        097              0.000000      17.622070       0.320106       0.330719       0.121500       0.170300       0.079600       0.520000
57564     57564     hunan          111.1297       29.4300          122       165     2012      04        07        098              0.000000      17.854645       0.295726       0.326791   -9999.000000   -9999.000000   -9999.000000   -9999.000000
57564     57564     hunan          111.1297       29.4300          122       165     2012      04        08        099              0.000000      16.788300       1.353831       0.325580   -9999.000000       0.096400   -9999.000000       0.102000
57564     57564     hunan          111.1297       29.4300          122       165     2012      04        09        100              0.000000      17.958008       0.255462       0.324688       0.144000       0.229100       0.063700   -9999.000000
57564     57564     hunan          111.1297       29.4300          122       165     2012      04        10        101              0.000000      17.089294      14.968355       0.327344       0.155000   -9999.000000       0.074400       0.662000
57564     57564     hunan          111.1297       29.4300          122       165     2012      04        11        102              0.000000      16.690674       0.335099       0.352373       0.134000       0.251700       0.076300       0.672000
57564     57564     hunan          111.1297       29.4300          122       165     2012      04        12        103              0.000000      17.783630      27.168577       0.336987   -9999.000000   -9999.000000       0.057000   -9999.000000
57564     57564     hunan          111.1297       29.4300          122       165     2012      04        13        104              0.000000      14.752838       0.598121       0.369438   -9999.000000       0.498700   -9999.000000       0.405000
57564     57564     hunan          111.1297       29.4300          122       165     2012      04        14        105              0.000000      15.476593       5.141275       0.346664       0.164000       0.372200   -9999.000000   -9999.000000
57564     57564     hunan          111.1297       29.4300          122       165     2012      04        15        106              0.000000      14.937897       2.057341       0.345178       0.145000   -9999.000000       0.066100       0.548000
57564     57564     hunan          111.1297       29.4300          122       165     2012      04        16        107              0.000000      14.665100       0.495675       0.348787       0.131000   -9999.000000       0.127300   -9999.000000
57564     57564     hunan          111.1297       29.4300          122       165     2012      04        17        108              0.000000      15.666107       0.435698       0.340290       0.133000       0.244200       0.138500       0.419000
57564     57564     hunan          111.1297       29.4300          122       165     2012      04        18        109              0.000000      14.687164       0.138197       0.339332   -9999.000000   -9999.000000   -9999.000000       0.327000
57564     57564     hunan          111.1297       29.4300          122       165     2012      04        19        110              0.000000      18.695038       0.841025       0.334878       0.149000       0.198800   -9999.000000   -9999.000000
57564     57564     hunan          111.1297       29.4300          122       165     2012      04        20        111              0.000000      20.347046       0.563951       0.332701       0.149000   -9999.000000   -9999.000000       0.478000
57564     57564     hunan          111.1297       29.4300          122       165     2012      04        21        112              0.000000      16.907043       0.671875       0.335847       0.189000       0.172900       0.124900   -9999.000000
57564     57564     hunan          111.1297       29.4300          122       165     2012      04        22        113              0.000000      21.049347       2.725488       0.329135       0.153000       0.265000       0.128000       0.341000
57564     57564     hunan          111.1297       29.4300          122       165     2012      04        23        114              0.000000      21.402588       0.000000       0.332950   -9999.000000   -9999.000000       0.189300       0.578000
57564     57564     hunan          111.1297       29.4300          122       165     2012      04        24        115              0.000000      20.631744       3.929492       0.330073   -9999.000000       0.114000   -9999.000000   -9999.000000
57564     57564     hunan          111.1297       29.4300          122       165     2012      04        25        116              0.000000      21.200134       2.171777       0.335350       0.209000   -9999.000000   -9999.000000       0.453000
57564     57564     hunan          111.1297       29.4300          122       165     2012      04        26        117              0.000000      18.527924       0.090885       0.336494       0.183000       0.155700       0.177900   -9999.000000
57564     57564     hunan          111.1297       29.4300          122       165     2012      04        27        118              0.000000      20.886017       0.158398       0.325595       0.177000   -9999.000000       0.173300       0.320000
57564     57564     hunan          111.1297       29.4300          122       165     2012      04        28        119              0.000000      22.485565       8.217676       0.321167   -9999.000000   -9999.000000       0.202100   -9999.000000
57564     57564     hunan          111.1297       29.4300          122       165     2012      04        29        120              0.000000      20.148621       9.461182       0.341831   -9999.000000       0.562900       0.186000   -9999.000000
57564     57564     hunan          111.1297       29.4300          122       165     2012      04        30        121              0.000000      20.748352       6.994141       0.337972       0.293000       0.269000   -9999.000000       0.775000
57564     57564     hunan          111.1297       29.4300          122       165     2012      05        01        122              0.000000      19.504700       4.411389       0.354640       0.255000       0.192700   -9999.000000   -9999.000000
57564     57564     hunan          111.1297       29.4300          122       165     2012      05        02        123              0.000000      19.319000       0.589579       0.346132       0.251000       0.225900       0.112400       0.765000
57564     57564     hunan          111.1297       29.4300          122       165     2012      05        03        124              0.000000      20.645996       4.361639       0.337876       0.201000   -9999.000000       0.124400   -9999.000000
57564     57564     hunan          111.1297       29.4300          122       165     2012      05        04        125              0.000000      19.450714       0.000000       0.343842   -9999.000000   -9999.000000       0.117600       0.655000
57564     57564     hunan          111.1297       29.4300          122       165     2012      05        05        126              0.000000      21.777100       0.000000       0.334961       0.231000   -9999.000000   -9999.000000       0.523000
57564     57564     hunan          111.1297       29.4300          122       165     2012      05        06        127              0.000000      24.246490       0.000000       0.328796       0.198000   -9999.000000   -9999.000000   -9999.000000
57564     57564     hunan          111.1297       29.4300          122       165     2012      05        07        128              0.000000      25.074310       1.799361       0.325748   -9999.000000       0.062200       0.092100       0.646000
57564     57564     hunan          111.1297       29.4300          122       165     2012      05        08        129              0.000000      26.009918      34.511444       0.327603       0.180000   -9999.000000       0.103000   -9999.000000
57564     57564     hunan          111.1297       29.4300          122       165     2012      05        09        130              0.000000      23.999207       5.824447       0.355070   -9999.000000       0.344400       0.106000       0.903000
57564     57564     hunan          111.1297       29.4300          122       165     2012      05        10        131              0.000000      22.786011       0.000000       0.362564       0.226000   -9999.000000       0.101300       0.718000
57564     57564     hunan          111.1297       29.4300          122       165     2012      05        11        132              0.000000      24.707733      24.804043       0.341353       0.275000   -9999.000000   -9999.000000   -9999.000000
57564     57564     hunan          111.1297       29.4300          122       165     2012      05        12        133              0.000000      24.354004      65.665817       0.365210       0.276000       0.232200   -9999.000000       0.691000
57564     57564     hunan          111.1297       29.4300          122       165     2012      05        13        134              0.000000      20.193451      28.288574       0.479428       0.216000   -9999.000000       0.101300   -9999.000000
57564     57564     hunan          111.1297       29.4300          122       165     2012      05        14        135              0.000000      19.108429      10.076607       0.490273   -9999.000000       0.096900       0.116400       0.517000
57564     57564     hunan          111.1297       29.4300          122       165     2012      05        15        136              0.000000      18.157623       0.000000       0.493873   -9999.000000       0.441200       0.109600   -9999.000000
57564     57564     hunan          111.1297       29.4300          122       165     2012      05        16        137              0.000000      19.257416       0.000000       0.375784       0.232000   -9999.000000       0.094600       0.465000
57564     57564     hunan          111.1297       29.4300          122       165     2012      05        17        138              0.000000      21.939453       0.880698       0.359808       0.209500       0.416300   -9999.000000       0.380000
57564     57564     hunan          111.1297       29.4300          122       165     2012      05        18        139              0.000000      23.628265      13.462481       0.350640       0.230000       0.397200   -9999.000000   -9999.000000
57564     57564     hunan          111.1297       29.4300          122       165     2012      05        19        140              0.000000      21.985199       0.304938       0.359510       0.204000       0.254300       0.103400       0.564000
57564     57564     hunan          111.1297       29.4300          122       165     2012      05        20        141              0.000000      23.967529       0.000000       0.350373   -9999.000000       0.111900       0.099400   -9999.000000
57564     57564     hunan          111.1297       29.4300          122       165     2012      05        21        142              0.000000      24.354767       4.620486       0.340769       0.346000   -9999.000000       0.079600       0.370000
57564     57564     hunan          111.1297       29.4300          122       165     2012      05        22        143              0.000000      22.837555      17.052586       0.342455       0.387000       0.132200   -9999.000000       0.733000
57564     57564     hunan          111.1297       29.4300          122       165     2012      05        23        144              0.000000      20.269989      12.782689       0.365531   -9999.000000       0.145200   -9999.000000   -9999.000000
57564     57564     hunan          111.1297       29.4300          122       165     2012      05        24        145              0.000000      18.977051       8.916115       0.360442       0.340000   -9999.000000       0.083000       0.964000
57564     57564     hunan          111.1297       29.4300          122       165     2012      05        25        146              0.000000      18.693634       0.000000       0.363515   -9999.000000       0.113500       0.083900   -9999.000000
57564     57564     hunan          111.1297       29.4300          122       165     2012      05        26        147              0.000000      19.070496       0.000000       0.352456       0.361000   -9999.000000       0.091000       0.398000
57564     57564     hunan          111.1297       29.4300          122       165     2012      05        27        148              0.000000      22.957703       0.484028       0.345586       0.298500       0.214900       0.081500   -9999.000000
57564     57564     hunan          111.1297       29.4300          122       165     2012      05        28        149              0.000000      23.503662       6.431323       0.342532       0.338000       0.111500   -9999.000000   -9999.000000
57564     57564     hunan          111.1297       29.4300          122       165     2012      05        29        150              0.000000      21.829590      27.885231       0.347104   -9999.000000   -9999.000000   -9999.000000       0.909000
57564     57564     hunan          111.1297       29.4300          122       165     2012      05        30        151              0.000000      20.661926       0.000000       0.375318   -9999.000000       0.181700       0.079600   -9999.000000
57564     57564     hunan          111.1297       29.4300          122       165     2012      05        31        152              0.000000      23.709198       2.010790       0.351441       0.358000   -9999.000000       0.078400   -9999.000000
57564     57564     hunan          111.1297       29.4300          122       165     2012      06        01        153              0.000000      22.717346       0.881386       0.350236       0.289000       0.174100       0.089900   -9999.000000
57564     57564     hunan          111.1297       29.4300          122       165     2012      06        02        154              0.000000      20.769135       0.000000       0.348895       0.244000       0.283600       0.079900       0.504000
57564     57564     hunan          111.1297       29.4300          122       165     2012      06        03        155              0.000000      23.192078      12.211227       0.341887       0.327000   -9999.000000   -9999.000000       0.862000
57564     57564     hunan          111.1297       29.4300          122       165     2012      06        04        156              0.000000      20.785461       8.086809       0.359035   -9999.000000       0.304000   -9999.000000   -9999.000000
57564     57564     hunan          111.1297       29.4300          122       165     2012      06        05        157              0.000000      20.951385       0.215402       0.359416   -9999.000000       0.366900       0.151900       0.456000
57564     57564     hunan          111.1297       29.4300          122       165     2012      06        06        158              0.000000      22.918762       7.305431       0.347890       0.279000       0.141700       0.149100   -9999.000000
57564     57564     hunan          111.1297       29.4300          122       165     2012      06        07        159              0.000000      24.048676       8.992154       0.354296       0.304000       0.151000       0.144900       0.922000
57564     57564     hunan          111.1297       29.4300          122       165     2012      06        08        160              0.000000      23.708557       0.000000       0.361012       0.234500   -9999.000000   -9999.000000       0.701000
57564     57564     hunan          111.1297       29.4300          122       165     2012      06        09        161              0.000000      26.680145       0.390539       0.347133       0.219000       0.246600   -9999.000000   -9999.000000
57564     57564     hunan          111.1297       29.4300          122       165     2012      06        10        162              0.000000      27.610077      22.996471       0.342623   -9999.000000       0.259000       0.134600       0.758000
57564     57564     hunan          111.1297       29.4300          122       165     2012      06        11        163              0.000000      25.202698       0.000000       0.376497       0.272000   -9999.000000       0.205000   -9999.000000
57564     57564     hunan          111.1297       29.4300          122       165     2012      06        12        164              0.000000      26.252167       0.000000       0.349533       0.218500       0.107900       0.183300       0.542000
57564     57564     hunan          111.1297       29.4300          122       165     2012      06        13        165              0.000000      27.027161       0.943460       0.342998       0.200500   -9999.000000       0.182000   -9999.000000
57564     57564     hunan          111.1297       29.4300          122       165     2012      06        14        166              0.000000      27.646973       0.153944       0.338657   -9999.000000       0.085400   -9999.000000       0.553000
57564     57564     hunan          111.1297       29.4300          122       165     2012      06        15        167              0.000000      25.199707       0.000000       0.340190   -9999.000000       0.186900   -9999.000000       0.442000
57564     57564     hunan          111.1297       29.4300          122       165     2012      06        16        168              0.000000      25.700867       0.000000       0.334812       0.226000   -9999.000000       0.190700   -9999.000000
57564     57564     hunan          111.1297       29.4300          122       165     2012      06        17        169              0.000000      25.867279       0.000000       0.333155       0.216500       0.188100       0.180800       0.450000
57564     57564     hunan          111.1297       29.4300          122       165     2012      06        18        170              0.000000      26.628510       0.000000       0.329896       0.198500   -9999.000000       0.196900   -9999.000000
57564     57564     hunan          111.1297       29.4300          122       165     2012      06        19        171              0.000000      26.935242       0.000000       0.327615       0.174000       0.271400       0.195800       0.375000
57564     57564     hunan          111.1297       29.4300          122       165     2012      06        20        172              0.000000      27.495636       0.000000       0.324295   -9999.000000       0.256800   -9999.000000       0.541000
57564     57564     hunan          111.1297       29.4300          122       165     2012      06        21        173              0.000000      27.917908       6.632752       0.322443       0.287000   -9999.000000   -9999.000000   -9999.000000
57564     57564     hunan          111.1297       29.4300          122       165     2012      06        22        174              0.000000      26.470642       0.000000       0.335498       0.259000       0.218500       0.193600       0.524000
57564     57564     hunan          111.1297       29.4300          122       165     2012      06        23        175              0.000000      27.991241       1.890384       0.326000       0.247000       0.210200       0.191400   -9999.000000
57564     57564     hunan          111.1297       29.4300          122       165     2012      06        24        176              0.000000      28.631348       0.000000       0.319732       0.228000       0.144300       0.185200       0.317000
57564     57564     hunan          111.1297       29.4300          122       165     2012      06        25        177              0.000000      28.512299      80.142960       0.315291   -9999.000000       0.117000   -9999.000000   -9999.000000
57564     57564     hunan          111.1297       29.4300          122       165     2012      06        26        178              0.000000      26.979187     205.111526       0.365843   -9999.000000   -9999.000000   -9999.000000   -9999.000000
57564     57564     hunan          111.1297       29.4300          122       165     2012      06        27        179              0.000000      25.400452      19.117382       0.609150       0.399000       0.216800       0.157000       1.000000
57564     57564     hunan          111.1297       29.4300          122       165     2012      06        28        180              0.000000      24.768768       0.805133       0.628702       0.316500       0.236600       0.157000   -9999.000000
57564     57564     hunan          111.1297       29.4300          122       165     2012      06        29        181              0.000000      25.155273       6.809296       0.497056       0.270000       0.114900       0.164200       0.827000
57564     57564     hunan          111.1297       29.4300          122       165     2012      06        30        182              0.000000      28.758972       0.000000       0.372977       0.244000       0.166300       0.147100   -9999.000000
57564     57564     hunan          111.1297       29.4300          122       165     2012      07        01        183              0.000000      27.712433       0.491473       0.359133   -9999.000000   -9999.000000   -9999.000000       0.854000
57564     57564     hunan          111.1297       29.4300          122       165     2012      07        02        184              0.000000      28.369141       1.170483       0.352095       0.229000       0.107800   -9999.000000       0.501000
57564     57564     hunan          111.1297       29.4300          122       165     2012      07        03        185              0.000000      29.015228       0.000000       0.343341       0.211500       0.157400       0.262800   -9999.000000
57564     57564     hunan          111.1297       29.4300          122       165     2012      07        04        186              0.000000      29.089386       0.000000       0.338585       0.209000   -9999.000000       0.242800       0.461000
57564     57564     hunan          111.1297       29.4300          122       165     2012      07        05        187              0.000000      28.493439       0.759538       0.334770       0.196000       0.144000       0.251600   -9999.000000
57564     57564     hunan          111.1297       29.4300          122       165     2012      07        06        188              0.000000      28.827545       2.097486       0.333707   -9999.000000   -9999.000000   -9999.000000       0.471000
57564     57564     hunan          111.1297       29.4300          122       165     2012      07        07        189              0.000000      29.890350       0.318327       0.328981   -9999.000000       0.321200   -9999.000000       0.638000
57564     57564     hunan          111.1297       29.4300          122       165     2012      07        08        190              0.000000      29.989563       0.404375       0.324529       0.209500       0.363800   -9999.000000   -9999.000000
57564     57564     hunan          111.1297       29.4300          122       165     2012      07        09        191              0.000000      29.625153       0.000000       0.319950       0.208500   -9999.000000       0.111600       0.421000
57564     57564     hunan          111.1297       29.4300          122       165     2012      07        10        192              0.000000      29.007721       0.000000       0.316955       0.203500       0.199700       0.116500   -9999.000000
57564     57564     hunan          111.1297       29.4300          122       165     2012      07        11        193              0.000000      29.889893       1.285282       0.314210   -9999.000000   -9999.000000       0.101300       0.575000
57564     57564     hunan          111.1297       29.4300          122       165     2012      07        12        194              0.000000      29.775787       5.256323       0.315587   -9999.000000       0.167300   -9999.000000   -9999.000000
57564     57564     hunan          111.1297       29.4300          122       165     2012      07        13        195              0.000000      29.052277      65.838470       0.321955       0.408000       0.042600   -9999.000000       1.000000
57564     57564     hunan          111.1297       29.4300          122       165     2012      07        14        196              0.000000      25.991913       0.391439       0.385279       0.302000   -9999.000000       0.122800       0.736000
57564     57564     hunan          111.1297       29.4300          122       165     2012      07        15        197              0.000000      27.630737      27.763948       0.351066       0.289500   -9999.000000       0.113900   -9999.000000
57564     57564     hunan          111.1297       29.4300          122       165     2012      07        16        198              0.000000      28.053223      36.643784       0.352663   -9999.000000       0.200400       0.088700       0.924000
57564     57564     hunan          111.1297       29.4300          122       165     2012      07        17        199              0.000000      25.909149      98.937286       0.392183   -9999.000000       0.150700       0.074300   -9999.000000
57564     57564     hunan          111.1297       29.4300          122       165     2012      07        18        200              0.000000      25.752716      12.813908       0.531052       0.370000       0.129400   -9999.000000       0.916000
57564     57564     hunan          111.1297       29.4300          122       165     2012      07        19        201              0.000000      25.400299      16.410723       0.570408       0.360000   -9999.000000   -9999.000000       1.000000
57564     57564     hunan          111.1297       29.4300          122       165     2012      07        20        202              0.000000      26.435028       1.164941       0.445280       0.344000       0.140200       0.093800   -9999.000000
57564     57564     hunan          111.1297       29.4300          122       165     2012      07        21        203              0.000000      28.738586       0.621359       0.372039       0.328000       0.164200       0.088500       0.650000
57564     57564     hunan          111.1297       29.4300          122       165     2012      07        22        204              0.000000      30.016571       1.822586       0.357274   -9999.000000   -9999.000000       0.085000   -9999.000000
57564     57564     hunan          111.1297       29.4300          122       165     2012      07        23        205              0.000000      29.648987       7.116974       0.349707   -9999.000000       0.190900   -9999.000000       1.000000
57564     57564     hunan          111.1297       29.4300          122       165     2012      07        24        206              0.000000      28.895813      24.541315       0.351167       0.426500   -9999.000000   -9999.000000   -9999.000000
57564     57564     hunan          111.1297       29.4300          122       165     2012      07        25        207              0.000000      28.977081       0.461613       0.366397       0.399500   -9999.000000       0.116500   -9999.000000
57564     57564     hunan          111.1297       29.4300          122       165     2012      07        26        208              0.000000      29.156921       0.893092       0.352371       0.371500       0.210300       0.115800       0.592000
57564     57564     hunan          111.1297       29.4300          122       165     2012      07        27        209              0.000000      29.718018       0.000000       0.344222       0.328000   -9999.000000       0.123400   -9999.000000
57564     57564     hunan          111.1297       29.4300          122       165     2012      07        28        210              0.000000      29.892090       3.749123       0.338265   -9999.000000       0.207200       0.115100       0.687000
57564     57564     hunan          111.1297       29.4300          122       165     2012      07        29        211              0.000000      29.401154       0.000000       0.342201       0.405000       0.153300   -9999.000000   -9999.000000
57564     57564     hunan          111.1297       29.4300          122       165     2012      07        30        212              0.000000      30.493439       0.000000       0.334631       0.373500       0.221800   -9999.000000       0.607000
57564     57564     hunan          111.1297       29.4300          122       165     2012      07        31        213              0.000000      30.995453       0.380265       0.329758       0.353000       0.064400       0.149600       0.632000
57564     57564     hunan          111.1297       29.4300          122       165     2012      08        01        214              0.000000      30.794128       0.364189       0.327088   -9999.000000   -9999.000000       0.144300   -9999.000000
57564     57564     hunan          111.1297       29.4300          122       165     2012      08        02        215              0.000000      30.023956       0.000000       0.325110   -9999.000000       0.148400       0.136100       0.349000
57564     57564     hunan          111.1297       29.4300          122       165     2012      08        03        216              0.000000      29.203064       0.000000       0.320933       0.336000       0.134300       0.136400   -9999.000000
57564     57564     hunan          111.1297       29.4300          122       165     2012      08        04        217              0.000000      29.032013       6.798106       0.317094       0.292000       0.116800   -9999.000000       0.468000
57564     57564     hunan          111.1297       29.4300          122       165     2012      08        05        218              0.000000      27.735474      64.682297       0.325423       0.326000       0.351100   -9999.000000       1.000000
57564     57564     hunan          111.1297       29.4300          122       165     2012      08        06        219              0.000000      27.148041       1.057766       0.400467       0.318000   -9999.000000       0.161900   -9999.000000
57564     57564     hunan          111.1297       29.4300          122       165     2012      08        07        220              0.000000      28.491394       2.787911       0.353634   -9999.000000       0.154200       0.146600       0.481000
57564     57564     hunan          111.1297       29.4300          122       165     2012      08        08        221              0.000000      28.814301      14.981672       0.341278   -9999.000000       0.213400       0.145000   -9999.000000
57564     57564     hunan          111.1297       29.4300          122       165     2012      08        09        222              0.000000      28.762421       2.211299       0.336295       0.342000   -9999.000000   -9999.000000       0.459000
57564     57564     hunan          111.1297       29.4300          122       165     2012      08        10        223              0.000000      28.831360       0.000000       0.333230       0.304500       0.202000   -9999.000000   -9999.000000
57564     57564     hunan          111.1297       29.4300          122       165     2012      08        11        224              0.000000      29.306244       0.000000       0.330481       0.337500   -9999.000000       0.155100       0.494000
57564     57564     hunan          111.1297       29.4300          122       165     2012      08        12        225              0.000000      29.604797       0.756842       0.328381       0.308000       0.182400       0.163400       0.457000
57564     57564     hunan          111.1297       29.4300          122       165     2012      08        13        226              0.000000      29.786652       7.069062       0.326323   -9999.000000       0.073100       0.128900   -9999.000000
57564     57564     hunan          111.1297       29.4300          122       165     2012      08        14        227              0.000000      28.975922       0.596729       0.335199       0.396000   -9999.000000       0.120800       0.558000
57564     57564     hunan          111.1297       29.4300          122       165     2012      08        15        228              0.000000      28.542572       5.377079       0.331530       0.367000       0.067900   -9999.000000   -9999.000000
57564     57564     hunan          111.1297       29.4300          122       165     2012      08        16        229              0.000000      28.825348       1.850299       0.326017       0.348500       0.088600   -9999.000000       0.408000
57564     57564     hunan          111.1297       29.4300          122       165     2012      08        17        230              0.000000      28.379425       0.831441       0.323279       0.302000       0.126700       0.125100       0.378000
57564     57564     hunan          111.1297       29.4300          122       165     2012      08        18        231              0.000000      29.483368       0.000000       0.319412   -9999.000000       0.157000       0.127000   -9999.000000
57564     57564     hunan          111.1297       29.4300          122       165     2012      08        19        232              0.000000      30.865265       1.776023       0.315285   -9999.000000   -9999.000000       0.118900       0.506000
57564     57564     hunan          111.1297       29.4300          122       165     2012      08        20        233              0.000000      30.290405      53.690083       0.318148   -9999.000000       0.279300       0.107400   -9999.000000
57564     57564     hunan          111.1297       29.4300          122       165     2012      08        21        234              0.000000      28.934387      16.874058       0.351840       0.286000       0.296700   -9999.000000       1.000000
57564     57564     hunan          111.1297       29.4300          122       165     2012      08        22        235              0.000000      24.391846       0.000000       0.372239       0.264500       0.152300   -9999.000000   -9999.000000
57564     57564     hunan          111.1297       29.4300          122       165     2012      08        23        236              0.000000      23.295837       0.665158       0.344510       0.228000       0.312600       0.125700   -9999.000000
57564     57564     hunan          111.1297       29.4300          122       165     2012      08        24        237              0.000000      23.274475       0.000000       0.337662   -9999.000000   -9999.000000       0.125400       0.555000
57564     57564     hunan          111.1297       29.4300          122       165     2012      08        25        238              0.000000      25.120697      20.704676       0.333430       0.295000       0.157200       0.118400   -9999.000000
57564     57564     hunan          111.1297       29.4300          122       165     2012      08        26        239              0.000000      26.031525       0.195578       0.331033       0.311000       0.268300   -9999.000000       0.375000
57564     57564     hunan          111.1297       29.4300          122       165     2012      08        27        240              0.000000      25.901520       0.000000       0.330246       0.262000   -9999.000000   -9999.000000   -9999.000000
57564     57564     hunan          111.1297       29.4300          122       165     2012      08        28        241              0.000000      26.631195       0.000000       0.326633       0.240000       0.167000       0.121300       0.429000
57564     57564     hunan          111.1297       29.4300          122       165     2012      08        29        242              0.000000      27.360779       1.456283       0.324561   -9999.000000   -9999.000000       0.128800       0.597000
57564     57564     hunan          111.1297       29.4300          122       165     2012      08        30        243              0.000000      28.493622       0.285053       0.324873       0.300000       0.289700       0.130000   -9999.000000
57564     57564     hunan          111.1297       29.4300          122       165     2012      08        31        244              0.000000      28.076599       0.363338       0.322573       0.289000       0.143800       0.123500       0.365000
57564     57564     hunan          111.1297       29.4300          122       165     2012      09        01        245              0.000000      28.123383      25.266346       0.322133       0.239000   -9999.000000   -9999.000000   -9999.000000
57564     57564     hunan          111.1297       29.4300          122       165     2012      09        02        246              0.000000      29.047150      49.989594       0.342848       0.301000       0.164800   -9999.000000       0.937000
57564     57564     hunan          111.1297       29.4300          122       165     2012      09        03        247              0.000000      23.770325       0.000000       0.392691   -9999.000000   -9999.000000       0.145500       0.804000
57564     57564     hunan          111.1297       29.4300          122       165     2012      09        04        248              0.000000      24.424011       0.000000       0.354538   -9999.000000       0.147100       0.138000   -9999.000000
57564     57564     hunan          111.1297       29.4300          122       165     2012      09        05        249              0.000000      24.777588       0.264342       0.344684       0.284000       0.235000       0.137800       0.333000
57564     57564     hunan          111.1297       29.4300          122       165     2012      09        06        250              0.000000      24.862518       0.000000       0.340498       0.275000   -9999.000000   -9999.000000   -9999.000000
57564     57564     hunan          111.1297       29.4300          122       165     2012      09        07        251              0.000000      26.255951       6.285088       0.337522       0.261500       0.177600   -9999.000000       0.484000
57564     57564     hunan          111.1297       29.4300          122       165     2012      09        08        252              0.000000      28.071808      22.197153       0.335845       0.230000       0.297900   -9999.000000   -9999.000000
57564     57564     hunan          111.1297       29.4300          122       165     2012      09        09        253              0.000000      26.410034       1.395298       0.353807   -9999.000000       0.163800       0.154500       0.382000
57564     57564     hunan          111.1297       29.4300          122       165     2012      09        10        254              0.000000      24.390930       2.933948       0.350972       0.349000       0.229300       0.181500       0.576000
57564     57564     hunan          111.1297       29.4300          122       165     2012      09        11        255              0.000000      24.165283       1.433611       0.347750       0.241500   -9999.000000       0.171200   -9999.000000
57564     57564     hunan          111.1297       29.4300          122       165     2012      09        12        256              0.000000      24.728607      33.167023       0.341573   -9999.000000   -9999.000000   -9999.000000       1.000000
57564     57564     hunan          111.1297       29.4300          122       165     2012      09        13        257              0.000000      20.607208       3.447686       0.377163       0.197000       0.158200   -9999.000000   -9999.000000
57564     57564     hunan          111.1297       29.4300          122       165     2012      09        14        258              0.000000      20.797791       9.358211       0.354008   -9999.000000   -9999.000000       0.171900       0.257000
57564     57564     hunan          111.1297       29.4300          122       165     2012      09        15        259              0.000000      21.753906      13.534122       0.346353   -9999.000000       0.410100       0.172100       0.533000
57564     57564     hunan          111.1297       29.4300          122       165     2012      09        16        260              0.000000      21.801849       0.000000       0.342198       0.252500   -9999.000000       0.170400   -9999.000000
57564     57564     hunan          111.1297       29.4300          122       165     2012      09        17        261              0.000000      20.364807      19.771452       0.341340       0.226500       0.222200       0.147900       0.291000
57564     57564     hunan          111.1297       29.4300          122       165     2012      09        18        262              0.000000      22.070648       0.000000       0.338339       0.219000       0.155700   -9999.000000   -9999.000000
57564     57564     hunan          111.1297       29.4300          122       165     2012      09        19        263              0.000000      23.559235       0.000000       0.336170       0.210000   -9999.000000   -9999.000000       0.299000
57564     57564     hunan          111.1297       29.4300          122       165     2012      09        20        264              0.000000      24.515839       8.149879       0.334114   -9999.000000       0.183400       0.175700   -9999.000000
57564     57564     hunan          111.1297       29.4300          122       165     2012      09        21        265              0.000000      24.235291       5.928493       0.340086   -9999.000000   -9999.000000       0.162700   -9999.000000
57564     57564     hunan          111.1297       29.4300          122       165     2012      09        22        266              0.000000      21.154083       0.712619       0.353081       0.235500       0.161900       0.154000       0.559000
57564     57564     hunan          111.1297       29.4300          122       165     2012      09        23        267              0.000000      23.930328       0.272871       0.340670       0.241000       0.354700   -9999.000000   -9999.000000
57564     57564     hunan          111.1297       29.4300          122       165     2012      09        24        268              0.000000      22.983734       0.534294       0.338483       0.210000   -9999.000000   -9999.000000       0.383000
57564     57564     hunan          111.1297       29.4300          122       165     2012      09        25        269              0.000000      23.053528       0.000000       0.335482   -9999.000000       0.347700       0.213000   -9999.000000
57564     57564     hunan          111.1297       29.4300          122       165     2012      09        26        270              0.000000      22.930359       0.277418       0.334325       0.250000       0.296200       0.219100       0.567000
57564     57564     hunan          111.1297       29.4300          122       165     2012      09        27        271              0.000000      22.743500       0.000000       0.333644       0.235000       0.300100       0.207500       0.361000
57564     57564     hunan          111.1297       29.4300          122       165     2012      09        28        272              0.000000      23.650635       0.000000       0.329545       0.212000   -9999.000000       0.209300   -9999.000000
57564     57564     hunan          111.1297       29.4300          122       165     2012      09        29        273              0.000000      21.647552       0.000000       0.325015       0.209000   -9999.000000   -9999.000000       0.221000
57564     57564     hunan          111.1297       29.4300          122       165     2012      09        30        274              0.000000      21.020691       0.000000       0.323006       0.199000       0.078900   -9999.000000   -9999.000000
57564     57564     hunan          111.1297       29.4300          122       165     2012      10        01        275              0.000000      20.106598       0.000000       0.322943   -9999.000000   -9999.000000       0.113300       0.215000
57564     57564     hunan          111.1297       29.4300          122       165     2012      10        02        276              0.000000      21.089752       0.304072       0.320013       0.217000   -9999.000000       0.121500       0.462000
57564     57564     hunan          111.1297       29.4300          122       165     2012      10        03        277              0.000000      20.806793       0.755704       0.319407       0.209000       0.308500       0.118700   -9999.000000
57564     57564     hunan          111.1297       29.4300          122       165     2012      10        04        278              0.000000      18.717133      10.771324       0.323472   -9999.000000   -9999.000000       0.120800       0.542000
57564     57564     hunan          111.1297       29.4300          122       165     2012      10        05        279              0.000000      17.926056      14.214914       0.340881       0.225000       0.291700   -9999.000000   -9999.000000
57564     57564     hunan          111.1297       29.4300          122       165     2012      10        06        280              0.000000      17.349609       0.082971       0.359782   -9999.000000       0.155800   -9999.000000       0.467000
57564     57564     hunan          111.1297       29.4300          122       165     2012      10        07        281              0.000000      19.117584       6.439614       0.340260       0.261000   -9999.000000       0.130500   -9999.000000
57564     57564     hunan          111.1297       29.4300          122       165     2012      10        08        282              0.000000      17.767181       5.549450       0.343494       0.238000       0.411900       0.079200       0.801000
57564     57564     hunan          111.1297       29.4300          122       165     2012      10        09        283              0.000000      17.634827       0.000000       0.348987       0.196500   -9999.000000       0.079500       0.481000
57564     57564     hunan          111.1297       29.4300          122       165     2012      10        10        284              0.000000      20.611481       0.838293       0.337047       0.172000       0.240500   -9999.000000   -9999.000000
57564     57564     hunan          111.1297       29.4300          122       165     2012      10        11        285              0.000000      20.255035       0.000000       0.330976   -9999.000000       0.192000   -9999.000000       0.518000
57564     57564     hunan          111.1297       29.4300          122       165     2012      10        12        286              0.349857      18.826508       4.660276       0.330470   -9999.000000   -9999.000000       0.082100   -9999.000000
57564     57564     hunan          111.1297       29.4300          122       165     2012      10        13        287              0.364542      17.818085       1.586572       0.334293       0.171000       0.355800       0.084100       0.465000
57564     57564     hunan          111.1297       29.4300          122       165     2012      10        14        288              0.367375      17.197174       1.653070       0.341389       0.172500       0.362400       0.094000       0.602000
57564     57564     hunan          111.1297       29.4300          122       165     2012      10        15        289              0.368833      18.683899      17.269617       0.336040       0.181500       0.197000       0.170500   -9999.000000
57564     57564     hunan          111.1297       29.4300          122       165     2012      10        16        290              0.373125      17.431946      16.645498       0.347837       0.185000       0.228800   -9999.000000       0.718000
57564     57564     hunan          111.1297       29.4300          122       165     2012      10        17        291              0.366458      17.325836       0.000000       0.367896   -9999.000000   -9999.000000   -9999.000000   -9999.000000
57564     57564     hunan          111.1297       29.4300          122       165     2012      10        18        292              0.362250      17.615173       0.000000       0.343373       0.174000       0.235000       0.164300       0.350000
57564     57564     hunan          111.1297       29.4300          122       165     2012      10        19        293              0.357708      18.527496       0.000000       0.338560       0.165500       0.144700       0.157300   -9999.000000
57564     57564     hunan          111.1297       29.4300          122       165     2012      10        20        294              0.357750      18.970459       1.592143       0.337525       0.158500       0.109300       0.162600   -9999.000000
57564     57564     hunan          111.1297       29.4300          122       165     2012      10        21        295              0.364696      19.596680       3.865930       0.339660       0.200000       0.203900       0.158400       0.598000
57564     57564     hunan          111.1297       29.4300          122       165     2012      10        22        296              0.370000      21.555084       0.360863       0.341198   -9999.000000   -9999.000000   -9999.000000   -9999.000000
57564     57564     hunan          111.1297       29.4300          122       165     2012      10        23        297              0.364875      17.084198       3.764721       0.339978   -9999.000000       0.147800   -9999.000000       0.217000
57564     57564     hunan          111.1297       29.4300          122       165     2012      10        24        298              0.363750      17.093323       4.146460       0.339184   -9999.000000       0.181600       0.083100   -9999.000000
57564     57564     hunan          111.1297       29.4300          122       165     2012      10        25        299              0.000000      15.062988       6.883174       0.348900       0.245500   -9999.000000       0.086600       0.600000
57564     57564     hunan          111.1297       29.4300          122       165     2012      10        26        300              0.369708      15.050476       0.843016       0.351671       0.232000   -9999.000000       0.084900       0.629000
57564     57564     hunan          111.1297       29.4300          122       165     2012      10        27        301              0.367833      15.450439       1.989479       0.345387       0.213000   -9999.000000   -9999.000000   -9999.000000
57564     57564     hunan          111.1297       29.4300          122       165     2012      10        28        302              0.000000      18.053925       5.826455       0.342503   -9999.000000       0.417200   -9999.000000       0.351000
57564     57564     hunan          111.1297       29.4300          122       165     2012      10        29        303              0.376625      18.732056       7.778538       0.344713       0.251000       0.173000       0.157900   -9999.000000
57564     57564     hunan          111.1297       29.4300          122       165     2012      10        30        304              0.368667      16.302612       0.000000       0.356303       0.221500   -9999.000000       0.155300       0.352000
57564     57564     hunan          111.1297       29.4300          122       165     2012      10        31        305              0.364917      15.969940       0.000000       0.343030       0.209000       0.198700       0.164900       0.592000
57564     57564     hunan          111.1297       29.4300          122       165     2012      11        01        306              0.361043      16.562408       1.325065       0.339086       0.159000       0.230100       0.152400   -9999.000000
57564     57564     hunan          111.1297       29.4300          122       165     2012      11        02        307              0.356167      15.912811       0.748145       0.338305   -9999.000000       0.254500   -9999.000000       0.280000
57564     57564     hunan          111.1297       29.4300          122       165     2012      11        03        308              0.356875      17.446808       0.968538       0.337064       0.219000       0.183800   -9999.000000   -9999.000000
57564     57564     hunan          111.1297       29.4300          122       165     2012      11        04        309              0.355708      14.056366       0.000000       0.339963       0.192500   -9999.000000       0.157200       0.309000
57564     57564     hunan          111.1297       29.4300          122       165     2012      11        05        310              0.359958      14.763916       2.655716       0.335739       0.192000       0.278100       0.117800   -9999.000000
57564     57564     hunan          111.1297       29.4300          122       165     2012      11        06        311              0.368542      13.153290       0.289365       0.339901       0.187500       0.207800       0.115300       0.153000
57564     57564     hunan          111.1297       29.4300          122       165     2012      11        07        312              0.366500      14.610168       2.019447       0.336704   -9999.000000   -9999.000000   -9999.000000       0.427000
57564     57564     hunan          111.1297       29.4300          122       165     2012      11        08        313              0.374238      12.518219      11.524691       0.337952   -9999.000000       0.221700   -9999.000000   -9999.000000
57564     57564     hunan          111.1297       29.4300          122       165     2012      11        09        314              0.372875      13.203979       1.744247       0.346346       0.229500   -9999.000000   -9999.000000       0.530000
57564     57564     hunan          111.1297       29.4300          122       165     2012      11        10        315              0.368750      11.343109       0.334892       0.351069       0.201500       0.215900       0.117600   -9999.000000
57564     57564     hunan          111.1297       29.4300          122       165     2012      11        11        316              0.366875      12.604675       0.000000       0.341116       0.185000       0.166100       0.122300       0.234000
57564     57564     hunan          111.1297       29.4300          122       165     2012      11        12        317              0.365042      12.473297       0.000000       0.337653       0.178000   -9999.000000       0.165700       0.328000
57564     57564     hunan          111.1297       29.4300          122       165     2012      11        13        318              0.000000      11.658661       0.000000       0.337046   -9999.000000       0.242000   -9999.000000   -9999.000000
57564     57564     hunan          111.1297       29.4300          122       165     2012      11        14        319              0.363917      15.126434       6.622180       0.335075       0.211000   -9999.000000   -9999.000000       0.359000
57564     57564     hunan          111.1297       29.4300          122       165     2012      11        15        320              0.381833      13.807587      15.537617       0.340012       0.229500   -9999.000000       0.166600   -9999.000000
57564     57564     hunan          111.1297       29.4300          122       165     2012      11        16        321              0.377375      10.482086       3.482498       0.363810   -9999.000000       0.358100       0.169400       0.408000
57564     57564     hunan          111.1297       29.4300          122       165     2012      11        17        322              0.000000       9.808563       0.653925       0.353275       0.173000   -9999.000000       0.150800   -9999.000000
57564     57564     hunan          111.1297       29.4300          122       165     2012      11        18        323              0.370125      13.063263       0.000000       0.343132   -9999.000000       0.319200       0.163200   -9999.000000
57564     57564     hunan          111.1297       29.4300          122       165     2012      11        19        324              0.369083      13.702118       0.000000       0.340344       0.198000       0.137400   -9999.000000       0.357000
57564     57564     hunan          111.1297       29.4300          122       165     2012      11        20        325              0.380917      13.094910       7.004915       0.339320       0.219000       0.189300   -9999.000000   -9999.000000
57564     57564     hunan          111.1297       29.4300          122       165     2012      11        21        326              0.377625      11.275024       3.565001       0.348437       0.197500       0.078600       0.099000       0.317000
57564     57564     hunan          111.1297       29.4300          122       165     2012      11        22        327              0.377333      11.198944       1.460582       0.348265       0.199500   -9999.000000       0.086100   -9999.000000
57564     57564     hunan          111.1297       29.4300          122       165     2012      11        23        328              0.371250      10.048859       0.000000       0.348207       0.186000       0.210100       0.086300       0.262000
57564     57564     hunan          111.1297       29.4300          122       165     2012      11        24        329              0.370500       8.416107       3.615083       0.342173   -9999.000000       0.177300   -9999.000000       0.172000
57564     57564     hunan          111.1297       29.4300          122       165     2012      11        25        330              0.375708       7.732147       0.162841       0.344858   -9999.000000       0.283200   -9999.000000   -9999.000000
57564     57564     hunan          111.1297       29.4300          122       165     2012      11        26        331              0.372042       7.727692       0.000000       0.344528       0.162000       0.198800   -9999.000000       0.101000
57564     57564     hunan          111.1297       29.4300          122       165     2012      11        27        332              0.369750       9.695557       0.000000       0.340182       0.186500   -9999.000000       0.136400   -9999.000000
57564     57564     hunan          111.1297       29.4300          122       165     2012      11        28        333              0.368250       8.514954       0.000000       0.339487       0.176000       0.192900       0.148000       0.232000
57564     57564     hunan          111.1297       29.4300          122       165     2012      11        29        334              0.366708       9.472626       0.307959       0.338453   -9999.000000       0.171000       0.143000       0.269000
57564     57564     hunan          111.1297       29.4300          122       165     2012      11        30        335              0.368250       7.354645       5.638759       0.338540       0.241000   -9999.000000   -9999.000000   -9999.000000
57564     57564     hunan          111.1297       29.4300          122       165     2012      12        01        336              0.376583       6.998962       0.824636       0.343292   -9999.000000       0.206100   -9999.000000       0.309000
57564     57564     hunan          111.1297       29.4300          122       165     2012      12        02        337              0.373167       6.648376       0.000000       0.346241       0.120000   -9999.000000       0.142100   -9999.000000
57564     57564     hunan          111.1297       29.4300          122       165     2012      12        03        338              0.370792       8.265930       0.000000       0.340000       0.114000   -9999.000000       0.100800       0.144000
57564     57564     hunan          111.1297       29.4300          122       165     2012      12        04        339              0.368583       9.193237       0.000000       0.337343   -9999.000000       0.158200       0.102000   -9999.000000
57564     57564     hunan          111.1297       29.4300          122       165     2012      12        05        340              0.366667       7.467377       0.000000       0.336941   -9999.000000   -9999.000000       0.099600       0.117000
57564     57564     hunan          111.1297       29.4300          122       165     2012      12        06        341              0.364208       9.634125       3.149844       0.335299       0.120000       0.217000   -9999.000000       0.289000
57564     57564     hunan          111.1297       29.4300          122       165     2012      12        07        342              0.362042       9.704193       0.000000       0.338217       0.118000       0.185400   -9999.000000   -9999.000000
57564     57564     hunan          111.1297       29.4300          122       165     2012      12        08        343              0.358292       9.927246       0.000000       0.335162       0.129000       0.252400       0.100200       0.217000
57564     57564     hunan          111.1297       29.4300          122       165     2012      12        09        344              0.349478       9.584595       0.000000       0.333164       0.128000       0.216700       0.103000   -9999.000000
57564     57564     hunan          111.1297       29.4300          122       165     2012      12        10        345              0.342500       6.353149       0.719471       0.332954   -9999.000000   -9999.000000       0.077100       0.140000
57564     57564     hunan          111.1297       29.4300          122       165     2012      12        11        346              0.341417       5.618286       0.000000       0.334110       0.172000       0.214000   -9999.000000       0.150000
57564     57564     hunan          111.1297       29.4300          122       165     2012      12        12        347              0.348958       5.508850      11.446959       0.333437       0.185000       0.128900   -9999.000000   -9999.000000
57564     57564     hunan          111.1297       29.4300          122       165     2012      12        13        348              0.375042       5.154572       2.200638       0.344534       0.180500       0.137800       0.080900       0.546000
57564     57564     hunan          111.1297       29.4300          122       165     2012      12        14        349              0.375333       5.446045       0.566485       0.349390       0.171000       0.151500       0.082500   -9999.000000
57564     57564     hunan          111.1297       29.4300          122       165     2012      12        15        350              0.000000       4.720093       0.000000       0.341975   -9999.000000   -9999.000000       0.083400       0.304000
57564     57564     hunan          111.1297       29.4300          122       165     2012      12        16        351              0.370708       5.550110       0.643270       0.337932       0.188000       0.186600       0.081000   -9999.000000
57564     57564     hunan          111.1297       29.4300          122       165     2012      12        17        352              0.377708       5.160950       9.690584       0.337266   -9999.000000       0.195900   -9999.000000   -9999.000000
57564     57564     hunan          111.1297       29.4300          122       165     2012      12        18        353              0.373042       4.425659       0.000000       0.353064   -9999.000000   -9999.000000   -9999.000000       0.132000
57564     57564     hunan          111.1297       29.4300          122       165     2012      12        19        354              0.373708       4.692932       3.194092       0.342207       0.196000       0.330200       0.076600   -9999.000000
57564     57564     hunan          111.1297       29.4300          122       165     2012      12        20        355              0.000000       2.696869       1.730478       0.343175   -9999.000000   -9999.000000       0.069000       0.308000
57564     57564     hunan          111.1297       29.4300          122       165     2012      12        21        356              0.371792       2.388702       0.358997       0.342111   -9999.000000   -9999.000000       0.064800   -9999.000000
57564     57564     hunan          111.1297       29.4300          122       165     2012      12        22        357              0.369917       3.248749       0.000000       0.340057   -9999.000000       0.311700   -9999.000000       0.226000
57564     57564     hunan          111.1297       29.4300          122       165     2012      12        23        358              0.366833       4.451569       4.897366       0.337707       0.129000   -9999.000000   -9999.000000       0.050000
57564     57564     hunan          111.1297       29.4300          122       165     2012      12        24        359              0.364111       4.201202       1.415041       0.335966       0.118000       0.279700   -9999.000000   -9999.000000
57564     57564     hunan          111.1297       29.4300          122       165     2012      12        25        360              0.361500       5.938995       0.946744       0.335485       0.140000   -9999.000000       0.083300       0.047000
57564     57564     hunan          111.1297       29.4300          122       165     2012      12        26        361              0.000000       2.696045       0.933445       0.332551   -9999.000000       0.349800       0.084600   -9999.000000
57564     57564     hunan          111.1297       29.4300          122       165     2012      12        27        362              0.374667       1.247864       2.325487       0.314754   -9999.000000       0.286400       0.084200       0.207000
57564     57564     hunan          111.1297       29.4300          122       165     2012      12        28        363              0.372000       0.934570      11.528759       0.306793   -9999.000000   -9999.000000   -9999.000000       0.111000
57564     57564     hunan          111.1297       29.4300          122       165     2012      12        29        364              0.000000       1.222595       3.789347       0.315973   -9999.000000       0.273500   -9999.000000   -9999.000000
57564     57564     hunan          111.1297       29.4300          122       165     2012      12        30        365              0.000000       1.488861       1.743835       0.344534   -9999.000000       0.162100       0.077900       0.017000
57564     57564     hunan          111.1297       29.4300          122       165     2012      12        31        366              0.368333       2.470642       5.095663       0.339861   -9999.000000       0.131700       0.099700   -9999.000000
