# Supplementary material for: Research on Fusing Multisatellite Soil Moisture Data Based on Bayesian Model Averaging
Source: Hindawi journal article supplement (doi:10.1155/2018/9310838), 2018-06-25
Supplement: f1 [file 9310838.f1.zip › 2012_sm00-10cm_daily_ZDB_ZHY_57565_366days_allin.txt]

57565     57565     hunan          111.7500       29.6497          121       167     2012      01        01        001              0.000000   -9999.000000       0.000000   -9999.000000       0.100000   -9999.000000       0.085600   -9999.000000
57565     57565     hunan          111.7500       29.6497          121       167     2012      01        02        002              0.302250       5.874542       0.334666       0.298355       0.138000       0.101000   -9999.000000       0.176000
57565     57565     hunan          111.7500       29.6497          121       167     2012      01        03        003              0.000000       4.500671       0.000000       0.299675   -9999.000000   -9999.000000   -9999.000000   -9999.000000
57565     57565     hunan          111.7500       29.6497          121       167     2012      01        04        004              0.299417       2.797424       0.000000       0.291132   -9999.000000   -9999.000000       0.098200   -9999.000000
57565     57565     hunan          111.7500       29.6497          121       167     2012      01        05        005              0.298208       4.052399       0.000000       0.294683   -9999.000000       0.217000       0.101300       0.187000
57565     57565     hunan          111.7500       29.6497          121       167     2012      01        06        006              0.296417       2.749695       0.000000       0.286699       0.105000   -9999.000000       0.108000   -9999.000000
57565     57565     hunan          111.7500       29.6497          121       167     2012      01        07        007              0.294500       4.598206       0.000000       0.292411   -9999.000000       0.205800       0.102200       0.231000
57565     57565     hunan          111.7500       29.6497          121       167     2012      01        08        008              0.000000       3.000793       0.000000       0.293440   -9999.000000       0.057900   -9999.000000   -9999.000000
57565     57565     hunan          111.7500       29.6497          121       167     2012      01        09        009              0.293167       2.823730       0.000000       0.293082   -9999.000000       0.235900   -9999.000000   -9999.000000
57565     57565     hunan          111.7500       29.6497          121       167     2012      01        10        010              0.293000       3.726776       0.000000       0.294137   -9999.000000       0.391100       0.064500       0.213000
57565     57565     hunan          111.7500       29.6497          121       167     2012      01        11        011              0.291625       3.823120       0.000000       0.294296   -9999.000000   -9999.000000       0.072300   -9999.000000
57565     57565     hunan          111.7500       29.6497          121       167     2012      01        12        012              0.290708       4.232422       0.000000       0.293305   -9999.000000   -9999.000000       0.069000       0.158000
57565     57565     hunan          111.7500       29.6497          121       167     2012      01        13        013              0.295542       3.367004       2.985022       0.293523   -9999.000000       0.144000       0.075800   -9999.000000
57565     57565     hunan          111.7500       29.6497          121       167     2012      01        14        014              0.309750       3.696198       9.647504       0.298490   -9999.000000   -9999.000000   -9999.000000       0.387000
57565     57565     hunan          111.7500       29.6497          121       167     2012      01        15        015              0.348583       3.222748       0.495247       0.310517   -9999.000000       0.476200   -9999.000000       0.442000
57565     57565     hunan          111.7500       29.6497          121       167     2012      01        16        016              0.355750       3.365112       0.000000       0.310611   -9999.000000   -9999.000000       0.075800   -9999.000000
57565     57565     hunan          111.7500       29.6497          121       167     2012      01        17        017              0.000000       5.245422       4.143562       0.302035   -9999.000000       0.454600       0.079900       0.329000
57565     57565     hunan          111.7500       29.6497          121       167     2012      01        18        018              0.363542       4.133484       0.864097       0.306064   -9999.000000       0.200500       0.069400   -9999.000000
57565     57565     hunan          111.7500       29.6497          121       167     2012      01        19        019              0.364917       4.920044       1.913546       0.305983   -9999.000000   -9999.000000   -9999.000000       0.493000
57565     57565     hunan          111.7500       29.6497          121       167     2012      01        20        020              0.367667       4.031860       8.232555       0.304318   -9999.000000       0.210600   -9999.000000   -9999.000000
57565     57565     hunan          111.7500       29.6497          121       167     2012      01        21        021              0.370000       3.243500       2.661213       0.313990   -9999.000000   -9999.000000       0.057100   -9999.000000
57565     57565     hunan          111.7500       29.6497          121       167     2012      01        22        022              0.366792       1.478058       2.572391       0.294268   -9999.000000   -9999.000000       0.055500       0.191000
57565     57565     hunan          111.7500       29.6497          121       167     2012      01        23        023              0.366542       0.800995       1.278430       0.258746   -9999.000000       0.126400       0.091100   -9999.000000
57565     57565     hunan          111.7500       29.6497          121       167     2012      01        24        024              0.363625       1.611328       1.095793       0.270431   -9999.000000   -9999.000000   -9999.000000       0.154000
57565     57565     hunan          111.7500       29.6497          121       167     2012      01        25        025              0.361917       2.751373       0.780205       0.280816   -9999.000000       0.082500   -9999.000000   -9999.000000
57565     57565     hunan          111.7500       29.6497          121       167     2012      01        26        026              0.360667       3.915558       0.707244       0.287905   -9999.000000       0.137400   -9999.000000       0.344000
57565     57565     hunan          111.7500       29.6497          121       167     2012      01        27        027              0.359750       5.298309       0.000000       0.297681   -9999.000000       0.133000       0.077800   -9999.000000
57565     57565     hunan          111.7500       29.6497          121       167     2012      01        28        028              0.358625       4.458008       0.000000       0.300410       0.111000       0.125100       0.081400   -9999.000000
57565     57565     hunan          111.7500       29.6497          121       167     2012      01        29        029              0.354333       5.653595       0.000000       0.299415   -9999.000000   -9999.000000       0.081100       0.275000
57565     57565     hunan          111.7500       29.6497          121       167     2012      01        30        030              0.351500       5.228058       0.000000       0.298873   -9999.000000       0.125000       0.124400   -9999.000000
57565     57565     hunan          111.7500       29.6497          121       167     2012      01        31        031              0.349875       5.399719       0.000000       0.297623   -9999.000000       0.163100   -9999.000000       0.109000
57565     57565     hunan          111.7500       29.6497          121       167     2012      02        01        032              0.347458       7.848724       0.000000       0.296459   -9999.000000   -9999.000000   -9999.000000   -9999.000000
57565     57565     hunan          111.7500       29.6497          121       167     2012      02        02        033              0.344167       4.855255       0.000000       0.296370   -9999.000000       0.227500       0.106200   -9999.000000
57565     57565     hunan          111.7500       29.6497          121       167     2012      02        03        034              0.340667       2.962311       0.000000       0.289025       0.118000   -9999.000000       0.107700       0.141000
57565     57565     hunan          111.7500       29.6497          121       167     2012      02        04        035              0.338750       6.163696       0.000000       0.292695   -9999.000000       0.329400       0.110700   -9999.000000
57565     57565     hunan          111.7500       29.6497          121       167     2012      02        05        036              0.340125       5.160156       0.817333       0.295445   -9999.000000   -9999.000000   -9999.000000       0.257000
57565     57565     hunan          111.7500       29.6497          121       167     2012      02        06        037              0.351125       4.358032       0.159422       0.297685   -9999.000000   -9999.000000   -9999.000000   -9999.000000
57565     57565     hunan          111.7500       29.6497          121       167     2012      02        07        038              0.349583       5.022491       0.000000       0.296879   -9999.000000       0.418100       0.108500   -9999.000000
57565     57565     hunan          111.7500       29.6497          121       167     2012      02        08        039              0.347167       4.572083       0.000000       0.292768   -9999.000000   -9999.000000       0.108600       0.170000
57565     57565     hunan          111.7500       29.6497          121       167     2012      02        09        040              0.344542       4.917358       0.000000       0.291843   -9999.000000       0.174000       0.103500   -9999.000000
57565     57565     hunan          111.7500       29.6497          121       167     2012      02        10        041              0.341417       2.930481       0.000000       0.289158   -9999.000000       0.200200       0.106800       0.011000
57565     57565     hunan          111.7500       29.6497          121       167     2012      02        11        042              0.338292       5.201477       0.000000       0.290253       0.194000   -9999.000000   -9999.000000   -9999.000000
57565     57565     hunan          111.7500       29.6497          121       167     2012      02        12        043              0.336958       6.627045       1.155544       0.290271   -9999.000000       0.180100   -9999.000000       0.241000
57565     57565     hunan          111.7500       29.6497          121       167     2012      02        13        044              0.341500       5.147400       0.000000       0.293417   -9999.000000       0.104000   -9999.000000       0.206000
57565     57565     hunan          111.7500       29.6497          121       167     2012      02        14        045              0.341792       4.764557       0.868551       0.294137       0.142000       0.045000       0.133200   -9999.000000
57565     57565     hunan          111.7500       29.6497          121       167     2012      02        15        046              0.341917       4.561066       0.144113       0.295283   -9999.000000       0.167600       0.135100       0.231000
57565     57565     hunan          111.7500       29.6497          121       167     2012      02        16        047              0.342000       4.314392       0.000000       0.294228   -9999.000000   -9999.000000   -9999.000000   -9999.000000
57565     57565     hunan          111.7500       29.6497          121       167     2012      02        17        048              0.341083       6.468536       0.000000       0.292594       0.123000       0.331700   -9999.000000       0.031000
57565     57565     hunan          111.7500       29.6497          121       167     2012      02        18        049              0.338708       6.899475       0.000000       0.290355       0.115000   -9999.000000   -9999.000000   -9999.000000
57565     57565     hunan          111.7500       29.6497          121       167     2012      02        19        050              0.334250       6.616638       0.000000       0.288960       0.110000   -9999.000000       0.122900   -9999.000000
57565     57565     hunan          111.7500       29.6497          121       167     2012      02        20        051              0.332333       8.420471       0.000000       0.287704   -9999.000000       0.216500       0.096500       0.078000
57565     57565     hunan          111.7500       29.6497          121       167     2012      02        21        052              0.336792       7.434845       2.815111       0.289178       0.152000   -9999.000000   -9999.000000   -9999.000000
57565     57565     hunan          111.7500       29.6497          121       167     2012      02        22        053              0.367583       7.333588       0.087575       0.293815       0.113000       0.228300   -9999.000000       0.278000
57565     57565     hunan          111.7500       29.6497          121       167     2012      02        23        054              0.365458       8.442657       0.082751       0.296752       0.110000       0.262100   -9999.000000   -9999.000000
57565     57565     hunan          111.7500       29.6497          121       167     2012      02        24        055              0.364250       6.909760       0.000000       0.293830   -9999.000000   -9999.000000       0.095400       0.198000
57565     57565     hunan          111.7500       29.6497          121       167     2012      02        25        056              0.363833       5.100769       1.377827       0.292234   -9999.000000       0.246200       0.089000       0.078000
57565     57565     hunan          111.7500       29.6497          121       167     2012      02        26        057              0.367833       3.645294       1.611768       0.293557   -9999.000000   -9999.000000       0.095500   -9999.000000
57565     57565     hunan          111.7500       29.6497          121       167     2012      02        27        058              0.367417       5.042145       0.513794       0.292128   -9999.000000       0.172600   -9999.000000       0.124000
57565     57565     hunan          111.7500       29.6497          121       167     2012      02        28        059              0.366875       3.979980       0.000000       0.290968       0.153000   -9999.000000   -9999.000000   -9999.000000
57565     57565     hunan          111.7500       29.6497          121       167     2012      02        29        060              0.000000   -9999.000000       0.000000   -9999.000000       0.102000   -9999.000000   -9999.000000   -9999.000000
57565     57565     hunan          111.7500       29.6497          121       167     2012      03        01        061              0.364542       6.389526       0.000000       0.290240       0.144000       0.100700       0.073200   -9999.000000
57565     57565     hunan          111.7500       29.6497          121       167     2012      03        02        062              0.367500       7.610962       7.183991       0.289986   -9999.000000       0.107300       0.087100   -9999.000000
57565     57565     hunan          111.7500       29.6497          121       167     2012      03        03        063              0.378083       6.571991       3.855946       0.300037   -9999.000000       0.080100       0.085100       0.612000
57565     57565     hunan          111.7500       29.6497          121       167     2012      03        04        064              0.374000       5.420074       0.124407       0.309905   -9999.000000       0.155500   -9999.000000   -9999.000000
57565     57565     hunan          111.7500       29.6497          121       167     2012      03        05        065              0.371333       4.826599       0.000000       0.302174       0.143000   -9999.000000   -9999.000000       0.209000
57565     57565     hunan          111.7500       29.6497          121       167     2012      03        06        066              0.372125       8.049194       0.657781       0.295923       0.157000       0.407000       0.093400   -9999.000000
57565     57565     hunan          111.7500       29.6497          121       167     2012      03        07        067              0.000000       7.383789       5.627104       0.295684   -9999.000000       0.218700       0.093900   -9999.000000
57565     57565     hunan          111.7500       29.6497          121       167     2012      03        08        068              0.378583       6.703369       2.863731       0.302423   -9999.000000   -9999.000000       0.089800       0.432000
57565     57565     hunan          111.7500       29.6497          121       167     2012      03        09        069              0.378417       5.740967       2.119632       0.306901   -9999.000000       0.375900       0.093100   -9999.000000
57565     57565     hunan          111.7500       29.6497          121       167     2012      03        10        070              0.374167       5.883057       0.000000       0.306923       0.134000   -9999.000000   -9999.000000       0.245000
57565     57565     hunan          111.7500       29.6497          121       167     2012      03        11        071              0.371458       9.295868       0.000000       0.297048       0.123000       0.311900   -9999.000000   -9999.000000
57565     57565     hunan          111.7500       29.6497          121       167     2012      03        12        072              0.369375       8.793945       0.000000       0.294516   -9999.000000       0.295300       0.098800       0.307000
57565     57565     hunan          111.7500       29.6497          121       167     2012      03        13        073              0.367583       8.178314       0.000000       0.292582   -9999.000000   -9999.000000       0.102100       0.026000
57565     57565     hunan          111.7500       29.6497          121       167     2012      03        14        074              0.366042      12.506653       0.170881       0.288815       0.154000       0.338000   -9999.000000   -9999.000000
57565     57565     hunan          111.7500       29.6497          121       167     2012      03        15        075              0.366167      11.935760       0.000000       0.288845       0.159000   -9999.000000       0.107300       0.151000
57565     57565     hunan          111.7500       29.6497          121       167     2012      03        16        076              0.365042      11.394653       0.054651       0.289694       0.147000       0.292200   -9999.000000   -9999.000000
57565     57565     hunan          111.7500       29.6497          121       167     2012      03        17        077              0.363292      11.355377       0.000000       0.289054   -9999.000000       0.318500   -9999.000000       0.122000
57565     57565     hunan          111.7500       29.6497          121       167     2012      03        18        078              0.361708      13.954987       1.391376       0.287620   -9999.000000   -9999.000000       0.106700   -9999.000000
57565     57565     hunan          111.7500       29.6497          121       167     2012      03        19        079              0.362042      14.622467       0.294483       0.290492   -9999.000000       0.118000       0.119100   -9999.000000
57565     57565     hunan          111.7500       29.6497          121       167     2012      03        20        080              0.362000       8.929657       0.204978       0.291106       0.144000       0.142600       0.125700       0.270000
57565     57565     hunan          111.7500       29.6497          121       167     2012      03        21        081              0.368250       7.951538      18.898563       0.290558       0.179000   -9999.000000   -9999.000000   -9999.000000
57565     57565     hunan          111.7500       29.6497          121       167     2012      03        22        082              0.389667       8.642212      23.478609       0.309979   -9999.000000       0.120500   -9999.000000       0.726000
57565     57565     hunan          111.7500       29.6497          121       167     2012      03        23        083              0.381750       7.509186       0.000000       0.342294   -9999.000000   -9999.000000       0.129900   -9999.000000
57565     57565     hunan          111.7500       29.6497          121       167     2012      03        24        084              0.374958      13.843628       0.000000       0.314985   -9999.000000       0.099800   -9999.000000       0.181000
57565     57565     hunan          111.7500       29.6497          121       167     2012      03        25        085              0.000000      15.447052       0.000000       0.301623       0.116000       0.313700       0.117100       0.399000
57565     57565     hunan          111.7500       29.6497          121       167     2012      03        26        086              0.346917      17.269379       0.517435       0.295678       0.105000   -9999.000000       0.137800   -9999.000000
57565     57565     hunan          111.7500       29.6497          121       167     2012      03        27        087              0.332042      18.450653       0.151093       0.292319       0.114000       0.179400   -9999.000000       0.322000
57565     57565     hunan          111.7500       29.6497          121       167     2012      03        28        088              0.327458      20.634766       1.750154       0.290152   -9999.000000   -9999.000000   -9999.000000   -9999.000000
57565     57565     hunan          111.7500       29.6497          121       167     2012      03        29        089              0.355917      17.676056      17.279600       0.296881       0.202000   -9999.000000       0.154400       0.746000
57565     57565     hunan          111.7500       29.6497          121       167     2012      03        30        090              0.382750      16.990265       1.286167       0.319701       0.146000       0.113700       0.174600   -9999.000000
57565     57565     hunan          111.7500       29.6497          121       167     2012      03        31        091              0.375542      16.337097       0.000000       0.315806       0.116000   -9999.000000       0.164700   -9999.000000
57565     57565     hunan          111.7500       29.6497          121       167     2012      04        01        092              0.361583      18.434235       0.000000       0.299524       0.130000   -9999.000000       0.142600       0.323000
57565     57565     hunan          111.7500       29.6497          121       167     2012      04        02        093              0.334708      20.632965       0.000000       0.293028   -9999.000000   -9999.000000   -9999.000000   -9999.000000
57565     57565     hunan          111.7500       29.6497          121       167     2012      04        03        094              0.315583      22.021454       0.046573       0.288388   -9999.000000       0.219400   -9999.000000       0.165000
57565     57565     hunan          111.7500       29.6497          121       167     2012      04        04        095              0.358417      17.864044       9.229672       0.288665   -9999.000000   -9999.000000       0.133700   -9999.000000
57565     57565     hunan          111.7500       29.6497          121       167     2012      04        05        096              0.368167      13.993652       0.000000       0.313653       0.176000   -9999.000000       0.129300   -9999.000000
57565     57565     hunan          111.7500       29.6497          121       167     2012      04        06        097              0.356792      18.236481       0.000000       0.299455       0.166500       0.374500       0.124400       0.392000
57565     57565     hunan          111.7500       29.6497          121       167     2012      04        07        098              0.343708      19.795502       0.138881       0.294282       0.158000       0.345200   -9999.000000   -9999.000000
57565     57565     hunan          111.7500       29.6497          121       167     2012      04        08        099              0.331625      20.196777       1.199356       0.292147   -9999.000000       0.294700   -9999.000000       0.162000
57565     57565     hunan          111.7500       29.6497          121       167     2012      04        09        100              0.330583      20.773468       1.120699       0.291334       0.234000       0.215600       0.108200   -9999.000000
57565     57565     hunan          111.7500       29.6497          121       167     2012      04        10        101              0.373542      19.984985      13.777419       0.295872   -9999.000000   -9999.000000       0.109800       0.760000
57565     57565     hunan          111.7500       29.6497          121       167     2012      04        11        102              0.377875      18.615204       0.122475       0.320924       0.201500   -9999.000000       0.124100       0.725000
57565     57565     hunan          111.7500       29.6497          121       167     2012      04        12        103              0.386667      19.791046      23.900751       0.304058   -9999.000000   -9999.000000       0.119700   -9999.000000
57565     57565     hunan          111.7500       29.6497          121       167     2012      04        13        104              0.379375      15.768494       0.104205       0.335923   -9999.000000       0.120200   -9999.000000       0.448000
57565     57565     hunan          111.7500       29.6497          121       167     2012      04        14        105              0.375750      17.787811       0.665099       0.310883   -9999.000000       0.305100   -9999.000000   -9999.000000
57565     57565     hunan          111.7500       29.6497          121       167     2012      04        15        106              0.384750      16.783325       4.149271       0.307387       0.191000   -9999.000000       0.119300       0.632000
57565     57565     hunan          111.7500       29.6497          121       167     2012      04        16        107              0.380875      16.062836       0.210498       0.312284       0.157000       0.145500       0.170500   -9999.000000
57565     57565     hunan          111.7500       29.6497          121       167     2012      04        17        108              0.380958      16.683716       0.380820       0.304946       0.182000       0.420100       0.181200   -9999.000000
57565     57565     hunan          111.7500       29.6497          121       167     2012      04        18        109              0.377875      17.122131       0.000000       0.303986   -9999.000000   -9999.000000   -9999.000000       0.370000
57565     57565     hunan          111.7500       29.6497          121       167     2012      04        19        110              0.372333      20.770508       0.958729       0.298376       0.244000       0.389300   -9999.000000   -9999.000000
57565     57565     hunan          111.7500       29.6497          121       167     2012      04        20        111              0.386667      22.958130       0.900733       0.295620       0.210000   -9999.000000   -9999.000000       0.690000
57565     57565     hunan          111.7500       29.6497          121       167     2012      04        21        112              0.378458      18.381348       1.154981       0.300498       0.200000   -9999.000000       0.155000   -9999.000000
57565     57565     hunan          111.7500       29.6497          121       167     2012      04        22        113              0.367500      23.045288       3.850000       0.292543       0.242000       0.294800       0.189400       0.399000
57565     57565     hunan          111.7500       29.6497          121       167     2012      04        23        114              0.350792      22.470398       0.098828       0.300670   -9999.000000   -9999.000000       0.179600       0.620000
57565     57565     hunan          111.7500       29.6497          121       167     2012      04        24        115              0.347500      23.897064       6.344385       0.295195   -9999.000000       0.599700   -9999.000000   -9999.000000
57565     57565     hunan          111.7500       29.6497          121       167     2012      04        25        116              0.000000      22.584686       0.163037       0.308254       0.224000       0.418300   -9999.000000       0.711000
57565     57565     hunan          111.7500       29.6497          121       167     2012      04        26        117              0.338833      20.203918       0.000000       0.297514       0.190000       0.236000       0.139600   -9999.000000
57565     57565     hunan          111.7500       29.6497          121       167     2012      04        27        118              0.311250      22.723206       0.000000       0.288132       0.240000       0.060900       0.160500       0.359000
57565     57565     hunan          111.7500       29.6497          121       167     2012      04        28        119              0.341708      24.407806      11.587476       0.283122   -9999.000000   -9999.000000       0.210000   -9999.000000
57565     57565     hunan          111.7500       29.6497          121       167     2012      04        29        120              0.359875      22.249817       0.553516       0.312382   -9999.000000       0.496700       0.179000   -9999.000000
57565     57565     hunan          111.7500       29.6497          121       167     2012      04        30        121              0.389417      22.836761      15.821142       0.300981       0.433000       0.460300   -9999.000000       0.960000
57565     57565     hunan          111.7500       29.6497          121       167     2012      05        01        122              0.385542      20.776276       2.129578       0.326215       0.240000       0.416400   -9999.000000   -9999.000000
57565     57565     hunan          111.7500       29.6497          121       167     2012      05        02        123              0.383208      21.792358       1.313163       0.309752       0.284500       0.383100       0.156300       0.685000
57565     57565     hunan          111.7500       29.6497          121       167     2012      05        03        124              0.387833      23.392487       2.535027       0.302393       0.265000   -9999.000000       0.155200   -9999.000000
57565     57565     hunan          111.7500       29.6497          121       167     2012      05        04        125              0.384542      21.687714       0.480726       0.306728   -9999.000000   -9999.000000       0.159100   -9999.000000
57565     57565     hunan          111.7500       29.6497          121       167     2012      05        05        126              0.376167      24.592133       0.901261       0.297423       0.344000   -9999.000000       0.181900       0.746000
57565     57565     hunan          111.7500       29.6497          121       167     2012      05        06        127              0.355917      26.627197       0.000000       0.291316       0.279500   -9999.000000   -9999.000000   -9999.000000
57565     57565     hunan          111.7500       29.6497          121       167     2012      05        07        128              0.348667      27.812897       4.220910       0.287909   -9999.000000   -9999.000000   -9999.000000       0.779000
57565     57565     hunan          111.7500       29.6497          121       167     2012      05        08        129              0.382167      27.648651      31.535616       0.295822       0.217000   -9999.000000       0.131800   -9999.000000
57565     57565     hunan          111.7500       29.6497          121       167     2012      05        09        130              0.390625      26.347321       1.437425       0.320192   -9999.000000   -9999.000000       0.124200       0.776000
57565     57565     hunan          111.7500       29.6497          121       167     2012      05        10        131              0.382583      24.736084       0.000000       0.324027       0.333000       0.087000       0.110500       0.695000
57565     57565     hunan          111.7500       29.6497          121       167     2012      05        11        132              0.387750      27.382263      26.971645       0.303501       0.355500   -9999.000000   -9999.000000   -9999.000000
57565     57565     hunan          111.7500       29.6497          121       167     2012      05        12        133              0.404292      27.150024      58.776386       0.329051       0.462000       0.415700   -9999.000000       0.837000
57565     57565     hunan          111.7500       29.6497          121       167     2012      05        13        134              0.392542      21.241364      28.877680       0.399407       0.261000   -9999.000000       0.149100   -9999.000000
57565     57565     hunan          111.7500       29.6497          121       167     2012      05        14        135              0.392542      20.663574       7.912027       0.406098   -9999.000000       0.346800       0.167100       0.751000
57565     57565     hunan          111.7500       29.6497          121       167     2012      05        15        136              0.386125      19.822693       0.888211       0.412158   -9999.000000       0.493500       0.206200   -9999.000000
57565     57565     hunan          111.7500       29.6497          121       167     2012      05        16        137              0.383333      21.495972       0.000000       0.342495   -9999.000000   -9999.000000       0.170000   -9999.000000
57565     57565     hunan          111.7500       29.6497          121       167     2012      05        17        138              0.376917      24.022064       0.000000       0.325847       0.285000       0.544200   -9999.000000       0.444000
57565     57565     hunan          111.7500       29.6497          121       167     2012      05        18        139              0.379542      26.276093      10.298072       0.316976       0.437000       0.469000   -9999.000000   -9999.000000
57565     57565     hunan          111.7500       29.6497          121       167     2012      05        19        140              0.386208      24.064148       0.000000       0.324317       0.252000       0.245200       0.161800       0.452000
57565     57565     hunan          111.7500       29.6497          121       167     2012      05        20        141              0.378750      26.503265       0.000000       0.312984   -9999.000000       0.366700       0.190200   -9999.000000
57565     57565     hunan          111.7500       29.6497          121       167     2012      05        21        142              0.364125      26.699005       0.229362       0.303648       0.482000   -9999.000000       0.215700       0.386000
57565     57565     hunan          111.7500       29.6497          121       167     2012      05        22        143              0.383500      25.818542      12.255186       0.303389       0.400500       0.470500   -9999.000000       0.547000
57565     57565     hunan          111.7500       29.6497          121       167     2012      05        23        144              0.389792      22.374725       9.977375       0.322877   -9999.000000       0.544100   -9999.000000   -9999.000000
57565     57565     hunan          111.7500       29.6497          121       167     2012      05        24        145              0.395125      20.647766       5.353516       0.324924       0.356000   -9999.000000   -9999.000000       0.952000
57565     57565     hunan          111.7500       29.6497          121       167     2012      05        25        146              0.000000      20.336365       0.238350       0.323239   -9999.000000   -9999.000000       0.188100   -9999.000000
57565     57565     hunan          111.7500       29.6497          121       167     2012      05        26        147              0.385917      21.220306       0.000000       0.312751   -9999.000000   -9999.000000       0.200500       0.423000
57565     57565     hunan          111.7500       29.6497          121       167     2012      05        27        148              0.382500      25.409607       0.000000       0.304592       0.374500       0.488200       0.187500   -9999.000000
57565     57565     hunan          111.7500       29.6497          121       167     2012      05        28        149              0.380917      25.537445       3.707362       0.303159       0.392000       0.441800   -9999.000000   -9999.000000
57565     57565     hunan          111.7500       29.6497          121       167     2012      05        29        150              0.394708      24.527283      35.066418       0.308555   -9999.000000   -9999.000000   -9999.000000       0.959000
57565     57565     hunan          111.7500       29.6497          121       167     2012      05        30        151              0.388042      22.022705       3.863061       0.345915   -9999.000000       0.479000       0.205500   -9999.000000
57565     57565     hunan          111.7500       29.6497          121       167     2012      05        31        152              0.384667      26.016388       0.241976       0.313955       0.492000       0.568300       0.188100   -9999.000000
57565     57565     hunan          111.7500       29.6497          121       167     2012      06        01        153              0.383958      25.937378       0.134112       0.309556       0.381000       0.338000       0.229800   -9999.000000
57565     57565     hunan          111.7500       29.6497          121       167     2012      06        02        154              0.380458      23.017426       0.000000       0.309083       0.305500       0.427700       0.195600   -9999.000000
57565     57565     hunan          111.7500       29.6497          121       167     2012      06        03        155              0.382333      25.739685       2.683707       0.303421       0.409000   -9999.000000   -9999.000000       0.786000
57565     57565     hunan          111.7500       29.6497          121       167     2012      06        04        156              0.393250      23.134369       1.997516       0.311159   -9999.000000       0.465400   -9999.000000   -9999.000000
57565     57565     hunan          111.7500       29.6497          121       167     2012      06        05        157              0.389833      23.350983       0.156215       0.311863   -9999.000000       0.622600       0.188400       0.491000
57565     57565     hunan          111.7500       29.6497          121       167     2012      06        06        158              0.391708      25.942963       4.787557       0.304868       0.465000       0.216000       0.186600   -9999.000000
57565     57565     hunan          111.7500       29.6497          121       167     2012      06        07        159              0.393042      26.621185       0.775646       0.309722       0.413000       0.289400       0.192300       0.750000
57565     57565     hunan          111.7500       29.6497          121       167     2012      06        08        160              0.390458      26.057190       0.472459       0.308332       0.278000   -9999.000000   -9999.000000       0.654000
57565     57565     hunan          111.7500       29.6497          121       167     2012      06        09        161              0.385875      29.262939       0.576893       0.300883       0.224000       0.261700   -9999.000000   -9999.000000
57565     57565     hunan          111.7500       29.6497          121       167     2012      06        10        162              0.391083      30.111877      23.960096       0.295436   -9999.000000       0.345300       0.167700       0.750000
57565     57565     hunan          111.7500       29.6497          121       167     2012      06        11        163              0.000000      27.048035       1.025926       0.342165       0.470000   -9999.000000       0.241300   -9999.000000
57565     57565     hunan          111.7500       29.6497          121       167     2012      06        12        164              0.387833      27.965210       1.294581       0.309659       0.345000       0.391400       0.254400       0.385000
57565     57565     hunan          111.7500       29.6497          121       167     2012      06        13        165              0.374000      29.324707       0.000000       0.299112       0.294000   -9999.000000       0.210800   -9999.000000
57565     57565     hunan          111.7500       29.6497          121       167     2012      06        14        166              0.362917      30.008057       0.329187       0.293598       0.263000       0.535500   -9999.000000   -9999.000000
57565     57565     hunan          111.7500       29.6497          121       167     2012      06        15        167              0.342708      26.669312       0.887489       0.297249   -9999.000000       0.543800   -9999.000000       0.309000
57565     57565     hunan          111.7500       29.6497          121       167     2012      06        16        168              0.321000      28.322388       0.000000       0.290372       0.440000   -9999.000000       0.198800   -9999.000000
57565     57565     hunan          111.7500       29.6497          121       167     2012      06        17        169              0.305542      28.402313       0.000000       0.287499       0.321500       0.532400       0.188500       0.449000
57565     57565     hunan          111.7500       29.6497          121       167     2012      06        18        170              0.290625      29.011047       0.000000       0.283782       0.295000   -9999.000000       0.269300   -9999.000000
57565     57565     hunan          111.7500       29.6497          121       167     2012      06        19        171              0.277667      29.160461       0.000000       0.280642       0.204000       0.400300       0.211000       0.404000
57565     57565     hunan          111.7500       29.6497          121       167     2012      06        20        172              0.270333      30.166443       0.000000       0.276167   -9999.000000       0.455400   -9999.000000       0.227000
57565     57565     hunan          111.7500       29.6497          121       167     2012      06        21        173              0.270125      30.389801       2.077425       0.274207   -9999.000000   -9999.000000   -9999.000000   -9999.000000
57565     57565     hunan          111.7500       29.6497          121       167     2012      06        22        174              0.266625      29.095642       0.000000       0.280258       0.335000       0.287100       0.206700       0.311000
57565     57565     hunan          111.7500       29.6497          121       167     2012      06        23        175              0.255750      30.769348       2.153170       0.273690       0.307500       0.547300       0.237000   -9999.000000
57565     57565     hunan          111.7500       29.6497          121       167     2012      06        24        176              0.245667      31.080231       0.000000       0.270763       0.268000       0.333500       0.203900       0.351000
57565     57565     hunan          111.7500       29.6497          121       167     2012      06        25        177              0.339625      31.041473     102.426178       0.265314       0.251000       0.438200   -9999.000000   -9999.000000
57565     57565     hunan          111.7500       29.6497          121       167     2012      06        26        178              0.405750      28.713440      62.263100       0.343274   -9999.000000   -9999.000000   -9999.000000   -9999.000000
57565     57565     hunan          111.7500       29.6497          121       167     2012      06        27        179              0.398833      26.599670       9.507578       0.440433       0.497000   -9999.000000       0.187300       0.939000
57565     57565     hunan          111.7500       29.6497          121       167     2012      06        28        180              0.386417      25.578522       2.479837       0.458758       0.403000       0.468800       0.184500   -9999.000000
57565     57565     hunan          111.7500       29.6497          121       167     2012      06        29        181              0.380708      26.755676       0.380545       0.394832       0.329000   -9999.000000       0.194600       0.690000
57565     57565     hunan          111.7500       29.6497          121       167     2012      06        30        182              0.376833      30.302155       0.000000       0.336083       0.275000       0.387100       0.184400   -9999.000000
57565     57565     hunan          111.7500       29.6497          121       167     2012      07        01        183              0.371917      28.310181       0.000000       0.324850   -9999.000000   -9999.000000   -9999.000000   -9999.000000
57565     57565     hunan          111.7500       29.6497          121       167     2012      07        02        184              0.347708      29.373047       0.000000       0.318614       0.417000       0.260400   -9999.000000       0.444000
57565     57565     hunan          111.7500       29.6497          121       167     2012      07        03        185              0.308458      31.361084       0.000000       0.308548       0.306000       0.345800       0.261100   -9999.000000
57565     57565     hunan          111.7500       29.6497          121       167     2012      07        04        186              0.278375      31.624268       0.000000       0.302540       0.281500   -9999.000000       0.237400       0.310000
57565     57565     hunan          111.7500       29.6497          121       167     2012      07        05        187              0.261000      31.242584       1.944757       0.299059       0.224000       0.196800       0.240100   -9999.000000
57565     57565     hunan          111.7500       29.6497          121       167     2012      07        06        188              0.249875      30.783386       0.000000       0.297840   -9999.000000   -9999.000000       0.239200       0.256000
57565     57565     hunan          111.7500       29.6497          121       167     2012      07        07        189              0.238750      32.107086       2.862846       0.294372   -9999.000000       0.431600   -9999.000000       0.377000
57565     57565     hunan          111.7500       29.6497          121       167     2012      07        08        190              0.230625      32.678925       0.000000       0.290149       0.303500       0.300800   -9999.000000   -9999.000000
57565     57565     hunan          111.7500       29.6497          121       167     2012      07        09        191              0.222750      32.055695       0.725407       0.284897       0.281000   -9999.000000       0.148800       0.281000
57565     57565     hunan          111.7500       29.6497          121       167     2012      07        10        192              0.218125      31.985657       0.000000       0.279596       0.265000       0.221800       0.190700   -9999.000000
57565     57565     hunan          111.7500       29.6497          121       167     2012      07        11        193              0.216208      32.172302       2.715036       0.277391       0.296000       0.329100       0.154700       0.266000
57565     57565     hunan          111.7500       29.6497          121       167     2012      07        12        194              0.294250      32.004669       1.587908       0.284368   -9999.000000       0.158400   -9999.000000   -9999.000000
57565     57565     hunan          111.7500       29.6497          121       167     2012      07        13        195              0.359292      30.710175      60.961090       0.285566       0.500000       0.330400   -9999.000000   -9999.000000
57565     57565     hunan          111.7500       29.6497          121       167     2012      07        14        196              0.373875      26.910461       0.000000       0.354578       0.370000   -9999.000000       0.163800       0.606000
57565     57565     hunan          111.7500       29.6497          121       167     2012      07        15        197              0.368917      29.518951       1.072943       0.316908       0.337000       0.599700       0.158600   -9999.000000
57565     57565     hunan          111.7500       29.6497          121       167     2012      07        16        198              0.381333      30.039062      10.475505       0.305007       0.285000       0.236400       0.195700       0.849000
57565     57565     hunan          111.7500       29.6497          121       167     2012      07        17        199              0.387292      28.510223      60.889435       0.318239   -9999.000000   -9999.000000       0.148600   -9999.000000
57565     57565     hunan          111.7500       29.6497          121       167     2012      07        18        200              0.396375      28.328918      33.677555       0.353026       0.468000       0.271400   -9999.000000       0.965000
57565     57565     hunan          111.7500       29.6497          121       167     2012      07        19        201              0.386000      27.261475       1.378463       0.394012       0.472000   -9999.000000   -9999.000000       0.689000
57565     57565     hunan          111.7500       29.6497          121       167     2012      07        20        202              0.382625      28.692383       7.239765       0.372049       0.356000       0.322500       0.167900   -9999.000000
57565     57565     hunan          111.7500       29.6497          121       167     2012      07        21        203              0.380545      30.524719       0.000000       0.340321       0.287000       0.368400       0.160800       0.546000
57565     57565     hunan          111.7500       29.6497          121       167     2012      07        22        204              0.376958      32.164276       0.000000       0.325414   -9999.000000   -9999.000000       0.165200   -9999.000000
57565     57565     hunan          111.7500       29.6497          121       167     2012      07        23        205              0.379625      31.727966      18.887987       0.317883   -9999.000000       0.372900   -9999.000000       0.802000
57565     57565     hunan          111.7500       29.6497          121       167     2012      07        24        206              0.391458      30.493866      25.343647       0.329945       0.418000       0.344900   -9999.000000   -9999.000000
57565     57565     hunan          111.7500       29.6497          121       167     2012      07        25        207              0.389083      30.758301       0.371493       0.343507       0.390500       0.481800   -9999.000000   -9999.000000
57565     57565     hunan          111.7500       29.6497          121       167     2012      07        26        208              0.385500      31.633331       1.107911       0.324630       0.358500       0.431100       0.199800       0.586000
57565     57565     hunan          111.7500       29.6497          121       167     2012      07        27        209              0.374583      31.950500       0.269703       0.317000       0.280000   -9999.000000       0.209600   -9999.000000
57565     57565     hunan          111.7500       29.6497          121       167     2012      07        28        210              0.387333      32.360413       0.354482       0.310618   -9999.000000       0.415900       0.201500       0.467000
57565     57565     hunan          111.7500       29.6497          121       167     2012      07        29        211              0.387917      32.327240       0.000000       0.306343       0.450000       0.221000   -9999.000000   -9999.000000
57565     57565     hunan          111.7500       29.6497          121       167     2012      07        30        212              0.384083      32.901215       0.000000       0.301430       0.373000       0.352500   -9999.000000   -9999.000000
57565     57565     hunan          111.7500       29.6497          121       167     2012      07        31        213              0.375292      33.647308       0.848424       0.298054       0.334500       0.225400       0.271100       0.561000
57565     57565     hunan          111.7500       29.6497          121       167     2012      08        01        214              0.362833      33.848114       0.635777       0.295819       0.279000   -9999.000000       0.271500   -9999.000000
57565     57565     hunan          111.7500       29.6497          121       167     2012      08        02        215              0.349292      32.630463       1.418037       0.293668   -9999.000000       0.170700       0.252100       0.321000
57565     57565     hunan          111.7500       29.6497          121       167     2012      08        03        216              0.337500      31.465332       1.656570       0.291992       0.464000       0.109100       0.240500   -9999.000000
57565     57565     hunan          111.7500       29.6497          121       167     2012      08        04        217              0.347000      31.205536      12.890955       0.288427       0.361000       0.220900   -9999.000000       0.351000
57565     57565     hunan          111.7500       29.6497          121       167     2012      08        05        218              0.389000      29.037354      19.516375       0.307136       0.407500       0.243800   -9999.000000       1.000000
57565     57565     hunan          111.7500       29.6497          121       167     2012      08        06        219              0.387750      29.641327       1.700966       0.333207       0.344000   -9999.000000       0.228000   -9999.000000
57565     57565     hunan          111.7500       29.6497          121       167     2012      08        07        220              0.386083      30.742767       0.000000       0.310372       0.311000       0.226200       0.222900       0.535000
57565     57565     hunan          111.7500       29.6497          121       167     2012      08        08        221              0.382958      31.489197       0.000000       0.297745   -9999.000000       0.275300       0.224200   -9999.000000
57565     57565     hunan          111.7500       29.6497          121       167     2012      08        09        222              0.375625      31.262024       0.000000       0.291878       0.435000   -9999.000000   -9999.000000       0.488000
57565     57565     hunan          111.7500       29.6497          121       167     2012      08        10        223              0.361250      31.291351       0.000000       0.287159       0.361000       0.235200   -9999.000000   -9999.000000
57565     57565     hunan          111.7500       29.6497          121       167     2012      08        11        224              0.342750      31.589874       0.000000       0.283267       0.364500   -9999.000000       0.223900   -9999.000000
57565     57565     hunan          111.7500       29.6497          121       167     2012      08        12        225              0.328833      32.179230       0.000000       0.279767       0.289000       0.387700       0.234700       0.317000
57565     57565     hunan          111.7500       29.6497          121       167     2012      08        13        226              0.326500      32.509552      13.759961       0.277261   -9999.000000       0.236800       0.260900   -9999.000000
57565     57565     hunan          111.7500       29.6497          121       167     2012      08        14        227              0.327167      30.476318       0.704560       0.304433       0.484000   -9999.000000       0.259800       0.512000
57565     57565     hunan          111.7500       29.6497          121       167     2012      08        15        228              0.322333      30.208801       0.197962       0.296127       0.408500       0.164300   -9999.000000   -9999.000000
57565     57565     hunan          111.7500       29.6497          121       167     2012      08        16        229              0.312750      30.861053       0.000000       0.288021       0.374500       0.388100   -9999.000000       0.476000
57565     57565     hunan          111.7500       29.6497          121       167     2012      08        17        230              0.299500      31.100311       0.000000       0.281636       0.380000       0.179500       0.235500       0.268000
57565     57565     hunan          111.7500       29.6497          121       167     2012      08        18        231              0.285292      32.230286       0.952664       0.276324   -9999.000000       0.096500       0.278400   -9999.000000
57565     57565     hunan          111.7500       29.6497          121       167     2012      08        19        232              0.273583      33.379089       2.269398       0.271039   -9999.000000   -9999.000000       0.233400       0.502000
57565     57565     hunan          111.7500       29.6497          121       167     2012      08        20        233              0.282167      32.931732      77.687546       0.269843   -9999.000000       0.266200       0.184800   -9999.000000
57565     57565     hunan          111.7500       29.6497          121       167     2012      08        21        234              0.384542      31.216461      12.045482       0.336095       0.399500       0.333100   -9999.000000       1.000000
57565     57565     hunan          111.7500       29.6497          121       167     2012      08        22        235              0.375167      26.036163       0.000000       0.361036       0.335000       0.217000   -9999.000000   -9999.000000
57565     57565     hunan          111.7500       29.6497          121       167     2012      08        23        236              0.366000      25.931671       0.000000       0.309796       0.269000       0.256200       0.220600   -9999.000000
57565     57565     hunan          111.7500       29.6497          121       167     2012      08        24        237              0.349750      25.237518       0.000000       0.301890   -9999.000000   -9999.000000       0.265700       0.566000
57565     57565     hunan          111.7500       29.6497          121       167     2012      08        25        238              0.000000      26.927917       0.000000       0.296346       0.446000       0.236500       0.226200   -9999.000000
57565     57565     hunan          111.7500       29.6497          121       167     2012      08        26        239              0.320250      28.396515       0.315112       0.293387       0.353500       0.293600   -9999.000000       0.340000
57565     57565     hunan          111.7500       29.6497          121       167     2012      08        27        240              0.310958      27.447021       0.000000       0.293364       0.336500   -9999.000000   -9999.000000   -9999.000000
57565     57565     hunan          111.7500       29.6497          121       167     2012      08        28        241              0.299375      28.517487       0.000000       0.289276       0.257000       0.300100       0.183400   -9999.000000
57565     57565     hunan          111.7500       29.6497          121       167     2012      08        29        242              0.288417      29.380554       1.248033       0.286664   -9999.000000   -9999.000000       0.185900       0.576000
57565     57565     hunan          111.7500       29.6497          121       167     2012      08        30        243              0.281292      30.916077       0.555856       0.283469       0.433000   -9999.000000       0.184600   -9999.000000
57565     57565     hunan          111.7500       29.6497          121       167     2012      08        31        244              0.276708      30.875793       0.000000       0.281549       0.380000       0.281300       0.165900       0.362000
57565     57565     hunan          111.7500       29.6497          121       167     2012      09        01        245              0.269917      30.766724       8.815238       0.280581       0.270000   -9999.000000   -9999.000000   -9999.000000
57565     57565     hunan          111.7500       29.6497          121       167     2012      09        02        246              0.349625      31.873566      32.080490       0.286746       0.323000       0.566400   -9999.000000       1.000000
57565     57565     hunan          111.7500       29.6497          121       167     2012      09        03        247              0.368500      25.551788       0.000000       0.341389       0.275000       0.321300       0.144100       0.620000
57565     57565     hunan          111.7500       29.6497          121       167     2012      09        04        248              0.356292      26.350861       0.000000       0.311579   -9999.000000       0.362800       0.160300   -9999.000000
57565     57565     hunan          111.7500       29.6497          121       167     2012      09        05        249              0.340083      27.386108       0.000000       0.298635       0.452000       0.587000       0.153500       0.483000
57565     57565     hunan          111.7500       29.6497          121       167     2012      09        06        250              0.320958      27.780701       0.000000       0.291771       0.367500   -9999.000000       0.150800   -9999.000000
57565     57565     hunan          111.7500       29.6497          121       167     2012      09        07        251              0.303125      28.402069       0.534768       0.287923       0.344500   -9999.000000   -9999.000000       0.506000
57565     57565     hunan          111.7500       29.6497          121       167     2012      09        08        252              0.343625      30.364868      11.667290       0.285687       0.293000       0.246000   -9999.000000   -9999.000000
57565     57565     hunan          111.7500       29.6497          121       167     2012      09        09        253              0.375000      27.601746       0.000000       0.306863   -9999.000000       0.283400       0.154200   -9999.000000
57565     57565     hunan          111.7500       29.6497          121       167     2012      09        10        254              0.372083      26.025543       1.065171       0.301264       0.489000       0.230700       0.194400       0.575000
57565     57565     hunan          111.7500       29.6497          121       167     2012      09        11        255              0.367333      26.124725       0.450216       0.297457       0.272000   -9999.000000       0.190300   -9999.000000
57565     57565     hunan          111.7500       29.6497          121       167     2012      09        12        256              0.369583      26.920990      12.681739       0.291519       0.340000   -9999.000000   -9999.000000       1.000000
57565     57565     hunan          111.7500       29.6497          121       167     2012      09        13        257              0.374667      22.216827       1.073476       0.317168       0.217000       0.216800   -9999.000000   -9999.000000
57565     57565     hunan          111.7500       29.6497          121       167     2012      09        14        258              0.362167      21.944397       0.000000       0.301339   -9999.000000   -9999.000000       0.188100       0.436000
57565     57565     hunan          111.7500       29.6497          121       167     2012      09        15        259              0.342917      23.424652       0.000000       0.291228   -9999.000000       0.410700       0.188600       0.671000
57565     57565     hunan          111.7500       29.6497          121       167     2012      09        16        260              0.333833      23.625641       0.000000       0.286385       0.379000   -9999.000000       0.199900   -9999.000000
57565     57565     hunan          111.7500       29.6497          121       167     2012      09        17        261              0.320750      22.825256       0.000000       0.286695       0.289500   -9999.000000       0.156000       0.487000
57565     57565     hunan          111.7500       29.6497          121       167     2012      09        18        262              0.307583      24.007172       0.000000       0.282630       0.269500       0.498800   -9999.000000   -9999.000000
57565     57565     hunan          111.7500       29.6497          121       167     2012      09        19        263              0.299292      25.643860       0.000000       0.279979       0.227000   -9999.000000   -9999.000000       0.399000
57565     57565     hunan          111.7500       29.6497          121       167     2012      09        20        264              0.296917      26.370697       6.195480       0.277547   -9999.000000       0.202900       0.187100   -9999.000000
57565     57565     hunan          111.7500       29.6497          121       167     2012      09        21        265              0.375250      26.803680       7.574891       0.284215   -9999.000000   -9999.000000       0.172500   -9999.000000
57565     57565     hunan          111.7500       29.6497          121       167     2012      09        22        266              0.371250      22.718506       0.145752       0.311349       0.303500       0.358600       0.158400       0.731000
57565     57565     hunan          111.7500       29.6497          121       167     2012      09        23        267              0.365917      26.299652       0.000000       0.294438       0.293000       0.502400       0.186500   -9999.000000
57565     57565     hunan          111.7500       29.6497          121       167     2012      09        24        268              0.359708      25.268127       0.000000       0.290451       0.224000   -9999.000000   -9999.000000       0.487000
57565     57565     hunan          111.7500       29.6497          121       167     2012      09        25        269              0.352917      25.687286       0.000000       0.286835   -9999.000000   -9999.000000   -9999.000000   -9999.000000
57565     57565     hunan          111.7500       29.6497          121       167     2012      09        26        270              0.344333      25.829620       0.207771       0.284925   -9999.000000       0.433500       0.159400   -9999.000000
57565     57565     hunan          111.7500       29.6497          121       167     2012      09        27        271              0.333571      25.466614       0.000000       0.283522       0.293500       0.216000       0.159700       0.545000
57565     57565     hunan          111.7500       29.6497          121       167     2012      09        28        272              0.309400      26.090240       0.000000       0.279006       0.260000   -9999.000000       0.152200   -9999.000000
57565     57565     hunan          111.7500       29.6497          121       167     2012      09        29        273              0.300042      23.209229       0.000000       0.273581       0.238000   -9999.000000   -9999.000000       0.293000
57565     57565     hunan          111.7500       29.6497          121       167     2012      09        30        274              0.294542      22.769318       0.000000       0.272030       0.221000       0.167700   -9999.000000   -9999.000000
57565     57565     hunan          111.7500       29.6497          121       167     2012      10        01        275              0.287208      21.643768       0.000000       0.274994   -9999.000000       0.354500       0.121600       0.369000
57565     57565     hunan          111.7500       29.6497          121       167     2012      10        02        276              0.281042      22.842285       0.293608       0.272085       0.327000   -9999.000000       0.125000       0.421000
57565     57565     hunan          111.7500       29.6497          121       167     2012      10        03        277              0.279333      23.423309       0.962019       0.272307       0.267000       0.317700       0.134700   -9999.000000
57565     57565     hunan          111.7500       29.6497          121       167     2012      10        04        278              0.286250      21.515869       8.247355       0.275350       0.348000   -9999.000000       0.112100       0.600000
57565     57565     hunan          111.7500       29.6497          121       167     2012      10        05        279              0.369000      20.316559       9.548112       0.291518   -9999.000000   -9999.000000   -9999.000000   -9999.000000
57565     57565     hunan          111.7500       29.6497          121       167     2012      10        06        280              0.369000      19.207275       0.367526       0.316517   -9999.000000   -9999.000000   -9999.000000       0.653000
57565     57565     hunan          111.7500       29.6497          121       167     2012      10        07        281              0.368875      20.995850       3.997259       0.299486       0.407000   -9999.000000       0.132900   -9999.000000
57565     57565     hunan          111.7500       29.6497          121       167     2012      10        08        282              0.378167      19.891541       3.026188       0.302232       0.337000       0.242400       0.123400   -9999.000000
57565     57565     hunan          111.7500       29.6497          121       167     2012      10        09        283              0.374958      19.408234       0.000000       0.305179       0.259000       0.135800       0.112100       0.623000
57565     57565     hunan          111.7500       29.6497          121       167     2012      10        10        284              0.367750      22.281555       1.630417       0.294428       0.244000       0.263100   -9999.000000   -9999.000000
57565     57565     hunan          111.7500       29.6497          121       167     2012      10        11        285              0.362625      22.662964       0.000000       0.287620   -9999.000000       0.194000   -9999.000000       0.545000
57565     57565     hunan          111.7500       29.6497          121       167     2012      10        12        286              0.360083      21.486023       1.828518       0.286859   -9999.000000   -9999.000000   -9999.000000   -9999.000000
57565     57565     hunan          111.7500       29.6497          121       167     2012      10        13        287              0.367208      19.968689       0.889863       0.289001       0.229000       0.363200       0.098900       0.513000
57565     57565     hunan          111.7500       29.6497          121       167     2012      10        14        288              0.365583      18.888489       1.916250       0.294416       0.193000       0.559500       0.130000       0.666000
57565     57565     hunan          111.7500       29.6497          121       167     2012      10        15        289              0.365000      20.977875       8.025765       0.291980       0.198000       0.219900       0.152200   -9999.000000
57565     57565     hunan          111.7500       29.6497          121       167     2012      10        16        290              0.383542      19.456696      26.735649       0.303067       0.189000       0.486700   -9999.000000       0.787000
57565     57565     hunan          111.7500       29.6497          121       167     2012      10        17        291              0.376500      18.591125       0.000000       0.335476   -9999.000000   -9999.000000   -9999.000000   -9999.000000
57565     57565     hunan          111.7500       29.6497          121       167     2012      10        18        292              0.370583      18.709808       0.000000       0.306017       0.237000       0.511600       0.140900       0.435000
57565     57565     hunan          111.7500       29.6497          121       167     2012      10        19        293              0.365667      19.785461       0.000000       0.297490       0.191500       0.400700       0.140400   -9999.000000
57565     57565     hunan          111.7500       29.6497          121       167     2012      10        20        294              0.363792      20.996307       0.737361       0.294330       0.180500   -9999.000000       0.157600   -9999.000000
57565     57565     hunan          111.7500       29.6497          121       167     2012      10        21        295              0.369565      21.814575       1.835473       0.294143       0.190000       0.606000       0.147200       0.664000
57565     57565     hunan          111.7500       29.6497          121       167     2012      10        22        296              0.378667      22.958313       0.000000       0.294764   -9999.000000   -9999.000000   -9999.000000   -9999.000000
57565     57565     hunan          111.7500       29.6497          121       167     2012      10        23        297              0.374417      18.354858       0.107830       0.291467   -9999.000000   -9999.000000   -9999.000000       0.448000
57565     57565     hunan          111.7500       29.6497          121       167     2012      10        24        298              0.384708      18.658081       1.324648       0.289351   -9999.000000       0.424800       0.096600   -9999.000000
57565     57565     hunan          111.7500       29.6497          121       167     2012      10        25        299              0.000000      16.407227       9.335333       0.294569       0.287000   -9999.000000       0.094900   -9999.000000
57565     57565     hunan          111.7500       29.6497          121       167     2012      10        26        300              0.386000      16.308044      13.383531       0.308307       0.257000       0.500200       0.107300       0.797000
57565     57565     hunan          111.7500       29.6497          121       167     2012      10        27        301              0.383083      16.377014       0.000000       0.324610       0.203000   -9999.000000   -9999.000000   -9999.000000
57565     57565     hunan          111.7500       29.6497          121       167     2012      10        28        302              0.000000      19.508911       6.315026       0.304532   -9999.000000       0.409200   -9999.000000       0.573000
57565     57565     hunan          111.7500       29.6497          121       167     2012      10        29        303              0.391167      21.093353       7.938618       0.305973   -9999.000000       0.466700       0.129900   -9999.000000
57565     57565     hunan          111.7500       29.6497          121       167     2012      10        30        304              0.385042      17.605042       0.000000       0.321442       0.209000   -9999.000000       0.145400       0.634000
57565     57565     hunan          111.7500       29.6497          121       167     2012      10        31        305              0.381625      17.042236       0.000000       0.304504       0.177000       0.439900       0.136100       0.709000
57565     57565     hunan          111.7500       29.6497          121       167     2012      11        01        306              0.378917      17.559326       0.000000       0.298792       0.155000       0.444900       0.130900   -9999.000000
57565     57565     hunan          111.7500       29.6497          121       167     2012      11        02        307              0.376125      16.910858       0.534071       0.297293   -9999.000000       0.277100   -9999.000000       0.443000
57565     57565     hunan          111.7500       29.6497          121       167     2012      11        03        308              0.378500      18.716461       1.421474       0.295226   -9999.000000       0.343400   -9999.000000   -9999.000000
57565     57565     hunan          111.7500       29.6497          121       167     2012      11        04        309              0.376913      14.599030       0.000000       0.298902       0.190000   -9999.000000       0.128500       0.421000
57565     57565     hunan          111.7500       29.6497          121       167     2012      11        05        310              0.375000      15.182159       0.244320       0.293757       0.165000       0.405700       0.141900   -9999.000000
57565     57565     hunan          111.7500       29.6497          121       167     2012      11        06        311              0.373708      14.201202       0.000000       0.294585       0.155000       0.428400       0.131500   -9999.000000
57565     57565     hunan          111.7500       29.6497          121       167     2012      11        07        312              0.372292      15.408203       0.692614       0.292213   -9999.000000   -9999.000000       0.143800       0.474000
57565     57565     hunan          111.7500       29.6497          121       167     2012      11        08        313              0.377619      13.600037       5.067738       0.294008   -9999.000000       0.283700   -9999.000000   -9999.000000
57565     57565     hunan          111.7500       29.6497          121       167     2012      11        09        314              0.387208      14.401611       2.710471       0.299658       0.303000   -9999.000000   -9999.000000       0.589000
57565     57565     hunan          111.7500       29.6497          121       167     2012      11        10        315              0.382958      12.928436       0.906370       0.309079       0.179000       0.377600       0.127400   -9999.000000
57565     57565     hunan          111.7500       29.6497          121       167     2012      11        11        316              0.380458      14.079926       0.000000       0.299214       0.150000       0.421200       0.143500       0.314000
57565     57565     hunan          111.7500       29.6497          121       167     2012      11        12        317              0.378625      13.599823       0.000000       0.294584       0.170000   -9999.000000       0.154000       0.551000
57565     57565     hunan          111.7500       29.6497          121       167     2012      11        13        318              0.000000      12.530487       0.000000       0.293839   -9999.000000       0.358600   -9999.000000   -9999.000000
57565     57565     hunan          111.7500       29.6497          121       167     2012      11        14        319              0.376000      16.155945       2.294062       0.291914       0.274000       0.550000   -9999.000000       0.560000
57565     57565     hunan          111.7500       29.6497          121       167     2012      11        15        320              0.390174      14.530090      10.063051       0.295251       0.213000       0.340600       0.137600   -9999.000000
57565     57565     hunan          111.7500       29.6497          121       167     2012      11        16        321              0.390125      10.732239       3.263470       0.317263   -9999.000000       0.405600       0.167600       0.612000
57565     57565     hunan          111.7500       29.6497          121       167     2012      11        17        322              0.000000      10.461884       6.956424       0.311559       0.155000   -9999.000000       0.174300   -9999.000000
57565     57565     hunan          111.7500       29.6497          121       167     2012      11        18        323              0.383708      12.296051       0.000000       0.302110   -9999.000000       0.341600       0.157100   -9999.000000
57565     57565     hunan          111.7500       29.6497          121       167     2012      11        19        324              0.382625      12.513733       0.000000       0.299228   -9999.000000       0.354300   -9999.000000       0.469000
57565     57565     hunan          111.7500       29.6497          121       167     2012      11        20        325              0.389042      14.012054       4.844014       0.296898       0.252000       0.266400   -9999.000000   -9999.000000
57565     57565     hunan          111.7500       29.6497          121       167     2012      11        21        326              0.391083      12.228241       1.305483       0.304989       0.166000       0.230800       0.121800       0.525000
57565     57565     hunan          111.7500       29.6497          121       167     2012      11        22        327              0.392417      12.321472       1.194287       0.305883       0.184000   -9999.000000       0.116900   -9999.000000
57565     57565     hunan          111.7500       29.6497          121       167     2012      11        23        328              0.387542      11.127167       0.000000       0.304963   -9999.000000       0.220800       0.122600   -9999.000000
57565     57565     hunan          111.7500       29.6497          121       167     2012      11        24        329              0.386458       9.678589       2.089423       0.299430   -9999.000000       0.317400   -9999.000000       0.500000
57565     57565     hunan          111.7500       29.6497          121       167     2012      11        25        330              0.390000       9.136261       0.232931       0.301434   -9999.000000   -9999.000000   -9999.000000   -9999.000000
57565     57565     hunan          111.7500       29.6497          121       167     2012      11        26        331              0.387042       8.898315       0.000000       0.301213       0.157000       0.230400   -9999.000000       0.317000
57565     57565     hunan          111.7500       29.6497          121       167     2012      11        27        332              0.385083      10.590912       0.000000       0.296861   -9999.000000   -9999.000000       0.102100   -9999.000000
57565     57565     hunan          111.7500       29.6497          121       167     2012      11        28        333              0.383833       9.903320       0.000000       0.296067       0.157000       0.270600       0.104100       0.422000
57565     57565     hunan          111.7500       29.6497          121       167     2012      11        29        334              0.383000      10.423187       0.363450       0.295606   -9999.000000       0.411000       0.117800       0.417000
57565     57565     hunan          111.7500       29.6497          121       167     2012      11        30        335              0.384792       8.848816       3.380579       0.295512       0.289000   -9999.000000   -9999.000000   -9999.000000
57565     57565     hunan          111.7500       29.6497          121       167     2012      12        01        336              0.393250       8.731110       3.315656       0.300059   -9999.000000       0.329700   -9999.000000       0.494000
57565     57565     hunan          111.7500       29.6497          121       167     2012      12        02        337              0.388375       6.782654       0.000000       0.308830   -9999.000000       0.290100       0.113400   -9999.000000
57565     57565     hunan          111.7500       29.6497          121       167     2012      12        03        338              0.386130       8.650146       0.000000       0.300083       0.123000   -9999.000000       0.109600       0.335000
57565     57565     hunan          111.7500       29.6497          121       167     2012      12        04        339              0.384750       9.567963       0.000000       0.296836   -9999.000000       0.329800       0.125700   -9999.000000
57565     57565     hunan          111.7500       29.6497          121       167     2012      12        05        340              0.383375       8.312256       0.000000       0.296221   -9999.000000   -9999.000000       0.120100   -9999.000000
57565     57565     hunan          111.7500       29.6497          121       167     2012      12        06        341              0.382208       9.966858       0.000000       0.294178   -9999.000000       0.275500   -9999.000000       0.306000
57565     57565     hunan          111.7500       29.6497          121       167     2012      12        07        342              0.382125      10.730316       0.000000       0.293056       0.132000       0.336200   -9999.000000   -9999.000000
57565     57565     hunan          111.7500       29.6497          121       167     2012      12        08        343              0.381958      11.082123       0.000000       0.292210       0.120000       0.440900       0.109300       0.414000
57565     57565     hunan          111.7500       29.6497          121       167     2012      12        09        344              0.380333      10.549042       0.000000       0.291059   -9999.000000       0.414800       0.122400   -9999.000000
57565     57565     hunan          111.7500       29.6497          121       167     2012      12        10        345              0.379250       8.196991       0.933174       0.290892   -9999.000000   -9999.000000       0.091800       0.410000
57565     57565     hunan          111.7500       29.6497          121       167     2012      12        11        346              0.379167       6.810852       0.000000       0.293845   -9999.000000       0.495800   -9999.000000       0.370000
57565     57565     hunan          111.7500       29.6497          121       167     2012      12        12        347              0.379833       7.122101       9.194081       0.292754       0.267000       0.275400   -9999.000000   -9999.000000
57565     57565     hunan          111.7500       29.6497          121       167     2012      12        13        348              0.393958       6.929413       2.554564       0.303532   -9999.000000   -9999.000000       0.101700       0.682000
57565     57565     hunan          111.7500       29.6497          121       167     2012      12        14        349              0.392458       6.514740       1.594893       0.312470   -9999.000000       0.340800       0.105900   -9999.000000
57565     57565     hunan          111.7500       29.6497          121       167     2012      12        15        350              0.000000       5.761505       0.000000       0.306002   -9999.000000   -9999.000000       0.102700       0.371000
57565     57565     hunan          111.7500       29.6497          121       167     2012      12        16        351              0.388792       7.036438       0.796576       0.299997   -9999.000000   -9999.000000       0.095800   -9999.000000
57565     57565     hunan          111.7500       29.6497          121       167     2012      12        17        352              0.394833       6.951508       4.727144       0.298443   -9999.000000       0.381600   -9999.000000   -9999.000000
57565     57565     hunan          111.7500       29.6497          121       167     2012      12        18        353              0.391958       5.700226       0.000000       0.308619   -9999.000000   -9999.000000   -9999.000000       0.408000
57565     57565     hunan          111.7500       29.6497          121       167     2012      12        19        354              0.390125       5.374603       0.479707       0.300972   -9999.000000       0.414600       0.120800   -9999.000000
57565     57565     hunan          111.7500       29.6497          121       167     2012      12        20        355              0.000000       4.633209       0.951939       0.299648   -9999.000000   -9999.000000       0.130200       0.612000
57565     57565     hunan          111.7500       29.6497          121       167     2012      12        21        356              0.391208       3.401093       0.414357       0.300480   -9999.000000       0.351500       0.118300   -9999.000000
57565     57565     hunan          111.7500       29.6497          121       167     2012      12        22        357              0.389125       4.901062       0.000000       0.297863   -9999.000000       0.376000       0.101300   -9999.000000
57565     57565     hunan          111.7500       29.6497          121       167     2012      12        23        358              0.387917       5.670807       0.637847       0.295664   -9999.000000   -9999.000000   -9999.000000       0.132000
57565     57565     hunan          111.7500       29.6497          121       167     2012      12        24        359              0.389444       4.819763       0.247523       0.293359       0.120000       0.492400   -9999.000000   -9999.000000
57565     57565     hunan          111.7500       29.6497          121       167     2012      12        25        360              0.387708       6.665863       0.000000       0.293354   -9999.000000       0.437400       0.118500       0.181000
57565     57565     hunan          111.7500       29.6497          121       167     2012      12        26        361              0.000000       3.290558       0.836503       0.293225   -9999.000000       0.316600       0.129500   -9999.000000
57565     57565     hunan          111.7500       29.6497          121       167     2012      12        27        362              0.391250       1.907990       0.903865       0.289422   -9999.000000       0.456700       0.127000       0.416000
57565     57565     hunan          111.7500       29.6497          121       167     2012      12        28        363              0.392000       2.376373       9.946006       0.290920   -9999.000000   -9999.000000   -9999.000000       0.304000
57565     57565     hunan          111.7500       29.6497          121       167     2012      12        29        364              0.000000       2.310089       4.054610       0.297985   -9999.000000       0.384300   -9999.000000   -9999.000000
57565     57565     hunan          111.7500       29.6497          121       167     2012      12        30        365              0.000000       2.326782       0.345126       0.312173   -9999.000000       0.400200       0.118700       0.150000
57565     57565     hunan          111.7500       29.6497          121       167     2012      12        31        366              0.388400       3.713440       0.449790       0.293968   -9999.000000       0.321700       0.122600   -9999.000000
