# Supplementary material for: Research on Fusing Multisatellite Soil Moisture Data Based on Bayesian Model Averaging
Source: Hindawi journal article supplement (doi:10.1155/2018/9310838), 2018-06-25
Supplement: f1 [file 9310838.f1.zip › 2012_sm00-10cm_daily_ZDB_ZHY_57581_366days_allin.txt]

57581     57581     hubei          113.2697       29.4897          122       173     2012      01        01        001              0.000000   -9999.000000       0.000000   -9999.000000   -9999.000000   -9999.000000       0.138700   -9999.000000
57581     57581     hubei          113.2697       29.4897          122       173     2012      01        02        002              0.000000       5.026459       0.000000       0.362892   -9999.000000       0.362500       0.208900       0.429000
57581     57581     hubei          113.2697       29.4897          122       173     2012      01        03        003              0.000000       4.576385       0.500920       0.366413   -9999.000000   -9999.000000   -9999.000000       0.406000
57581     57581     hubei          113.2697       29.4897          122       173     2012      01        04        004              0.000000       2.699005       0.346021       0.356431   -9999.000000       0.278500   -9999.000000   -9999.000000
57581     57581     hubei          113.2697       29.4897          122       173     2012      01        05        005              0.000000       3.606140       0.000000       0.359711   -9999.000000       0.211300       0.194000       0.878000
57581     57581     hubei          113.2697       29.4897          122       173     2012      01        06        006              0.000000       2.714325       0.000000       0.356950   -9999.000000   -9999.000000       0.227900   -9999.000000
57581     57581     hubei          113.2697       29.4897          122       173     2012      01        07        007              0.000000       4.537781       0.000000       0.360813   -9999.000000       0.313500       0.198400       0.460000
57581     57581     hubei          113.2697       29.4897          122       173     2012      01        08        008              0.000000       2.869171       0.000000       0.360875   -9999.000000       0.262400   -9999.000000       0.303000
57581     57581     hubei          113.2697       29.4897          122       173     2012      01        09        009              0.000000       3.247009       0.000000       0.361298   -9999.000000   -9999.000000   -9999.000000   -9999.000000
57581     57581     hubei          113.2697       29.4897          122       173     2012      01        10        010              0.000000       4.370270       0.000000       0.360899   -9999.000000       0.301100       0.121000       0.638000
57581     57581     hubei          113.2697       29.4897          122       173     2012      01        11        011              0.000000       4.367859       0.000000       0.360335   -9999.000000   -9999.000000       0.144100   -9999.000000
57581     57581     hubei          113.2697       29.4897          122       173     2012      01        12        012              0.000000       4.228302       0.000000       0.359422   -9999.000000       0.446400       0.159400       0.405000
57581     57581     hubei          113.2697       29.4897          122       173     2012      01        13        013              0.000000       4.054474       2.770866       0.359096   -9999.000000       0.118100       0.140100   -9999.000000
57581     57581     hubei          113.2697       29.4897          122       173     2012      01        14        014              0.000000       3.875061       9.253135       0.361668   -9999.000000   -9999.000000   -9999.000000   -9999.000000
57581     57581     hubei          113.2697       29.4897          122       173     2012      01        15        015              0.000000       3.453918       2.437657       0.369471   -9999.000000       0.195000   -9999.000000       1.000000
57581     57581     hubei          113.2697       29.4897          122       173     2012      01        16        016              0.000000       2.299622       0.329575       0.369302   -9999.000000   -9999.000000       0.130400   -9999.000000
57581     57581     hubei          113.2697       29.4897          122       173     2012      01        17        017              0.000000       3.363586       1.387973       0.362800   -9999.000000   -9999.000000       0.128900       0.877000
57581     57581     hubei          113.2697       29.4897          122       173     2012      01        18        018              0.000000       4.019653       1.892776       0.362394   -9999.000000       0.498300       0.133400   -9999.000000
57581     57581     hubei          113.2697       29.4897          122       173     2012      01        19        019              0.000000       4.982269       0.134069       0.364616   -9999.000000   -9999.000000       0.126400   -9999.000000
57581     57581     hubei          113.2697       29.4897          122       173     2012      01        20        020              0.000000       3.967621       2.424987       0.361894   -9999.000000       0.325900   -9999.000000       0.983000
57581     57581     hubei          113.2697       29.4897          122       173     2012      01        21        021              0.000000       3.977173       2.223837       0.362929   -9999.000000   -9999.000000   -9999.000000   -9999.000000
57581     57581     hubei          113.2697       29.4897          122       173     2012      01        22        022              0.000000       1.654236       2.895426       0.344053   -9999.000000   -9999.000000       0.099000       0.385000
57581     57581     hubei          113.2697       29.4897          122       173     2012      01        23        023              0.000000       0.809875       1.110606       0.312937   -9999.000000       0.306700       0.193600   -9999.000000
57581     57581     hubei          113.2697       29.4897          122       173     2012      01        24        024              0.000000       1.966461       0.056007       0.332826   -9999.000000   -9999.000000   -9999.000000       0.355000
57581     57581     hubei          113.2697       29.4897          122       173     2012      01        25        025              0.000000       2.581116       0.000000       0.330135   -9999.000000   -9999.000000   -9999.000000       0.580000
57581     57581     hubei          113.2697       29.4897          122       173     2012      01        26        026              0.000000       3.610352       0.000000       0.337780   -9999.000000       0.237400   -9999.000000   -9999.000000
57581     57581     hubei          113.2697       29.4897          122       173     2012      01        27        027              0.000000       5.588959       0.000000       0.352860   -9999.000000   -9999.000000       0.177100       0.478000
57581     57581     hubei          113.2697       29.4897          122       173     2012      01        28        028              0.000000       3.874908       0.000000       0.356292   -9999.000000       0.157500       0.168100   -9999.000000
57581     57581     hubei          113.2697       29.4897          122       173     2012      01        29        029              0.000000       4.209473       0.000000       0.355349   -9999.000000   -9999.000000       0.207700       0.683000
57581     57581     hubei          113.2697       29.4897          122       173     2012      01        30        030              0.000000       4.310547       0.165989       0.355249   -9999.000000       0.195800       0.173700   -9999.000000
57581     57581     hubei          113.2697       29.4897          122       173     2012      01        31        031              0.000000       3.965271       0.000000       0.354101   -9999.000000       0.174300   -9999.000000   -9999.000000
57581     57581     hubei          113.2697       29.4897          122       173     2012      02        01        032              0.000000       6.779816       0.213104       0.352733   -9999.000000   -9999.000000   -9999.000000       0.665000
57581     57581     hubei          113.2697       29.4897          122       173     2012      02        02        033              0.000000       6.268036       0.000000       0.351611   -9999.000000       0.357000       0.134700   -9999.000000
57581     57581     hubei          113.2697       29.4897          122       173     2012      02        03        034              0.000000       2.784363       0.000000       0.346411   -9999.000000   -9999.000000       0.175800       0.522000
57581     57581     hubei          113.2697       29.4897          122       173     2012      02        04        035              0.000000       6.184113       0.320964       0.348754   -9999.000000       0.211300       0.156700   -9999.000000
57581     57581     hubei          113.2697       29.4897          122       173     2012      02        05        036              0.000000       4.369446       5.618536       0.351276   -9999.000000       0.111300   -9999.000000       1.000000
57581     57581     hubei          113.2697       29.4897          122       173     2012      02        06        037              0.000000       4.428528       1.111404       0.359269   -9999.000000   -9999.000000   -9999.000000       0.691000
57581     57581     hubei          113.2697       29.4897          122       173     2012      02        07        038              0.000000       5.179169       0.000000       0.358064   -9999.000000       0.380700   -9999.000000   -9999.000000
57581     57581     hubei          113.2697       29.4897          122       173     2012      02        08        039              0.000000       4.810516       0.000000       0.350434   -9999.000000   -9999.000000       0.187000       1.000000
57581     57581     hubei          113.2697       29.4897          122       173     2012      02        09        040              0.000000       4.729950       0.759096       0.348974   -9999.000000       0.293400       0.187000   -9999.000000
57581     57581     hubei          113.2697       29.4897          122       173     2012      02        10        041              0.398118       3.207886       0.000000       0.347364   -9999.000000       0.629300       0.169500       0.806000
57581     57581     hubei          113.2697       29.4897          122       173     2012      02        11        042              0.396083       4.088745       0.000000       0.346132   -9999.000000   -9999.000000   -9999.000000   -9999.000000
57581     57581     hubei          113.2697       29.4897          122       173     2012      02        12        043              0.394667       6.675873       0.371309       0.347662   -9999.000000       0.406300   -9999.000000   -9999.000000
57581     57581     hubei          113.2697       29.4897          122       173     2012      02        13        044              0.397417       5.036926       1.293513       0.349286   -9999.000000       0.202200   -9999.000000       1.000000
57581     57581     hubei          113.2697       29.4897          122       173     2012      02        14        045              0.435167       4.673035       1.378473       0.351443   -9999.000000   -9999.000000       0.225400   -9999.000000
57581     57581     hubei          113.2697       29.4897          122       173     2012      02        15        046              0.467375       4.149628       0.628478       0.353319   -9999.000000       0.557400       0.198800       0.841000
57581     57581     hubei          113.2697       29.4897          122       173     2012      02        16        047              0.468250       4.225494       0.196172       0.352815   -9999.000000   -9999.000000       0.202300   -9999.000000
57581     57581     hubei          113.2697       29.4897          122       173     2012      02        17        048              0.467375       4.000793       0.000000       0.351156   -9999.000000   -9999.000000   -9999.000000   -9999.000000
57581     57581     hubei          113.2697       29.4897          122       173     2012      02        18        049              0.435250       6.619781       0.000000       0.348748   -9999.000000   -9999.000000   -9999.000000       1.000000
57581     57581     hubei          113.2697       29.4897          122       173     2012      02        19        050              0.410792       6.250214       0.000000       0.347214   -9999.000000   -9999.000000       0.201400   -9999.000000
57581     57581     hubei          113.2697       29.4897          122       173     2012      02        20        051              0.407348       8.487976       0.746226       0.345075   -9999.000000       0.200700       0.150000       0.229000
57581     57581     hubei          113.2697       29.4897          122       173     2012      02        21        052              0.445500       6.911407      13.569434       0.347617   -9999.000000   -9999.000000   -9999.000000   -9999.000000
57581     57581     hubei          113.2697       29.4897          122       173     2012      02        22        053              0.471292       7.583221       5.433072       0.360757   -9999.000000       0.573700   -9999.000000       0.775000
57581     57581     hubei          113.2697       29.4897          122       173     2012      02        23        054              0.471667       7.887451       5.347750       0.369392   -9999.000000       0.256200   -9999.000000       0.999000
57581     57581     hubei          113.2697       29.4897          122       173     2012      02        24        055              0.470125       7.136169       0.374594       0.366293   -9999.000000   -9999.000000   -9999.000000   -9999.000000
57581     57581     hubei          113.2697       29.4897          122       173     2012      02        25        056              0.469708       5.108398       3.715587       0.358843   -9999.000000       0.352100       0.188500       0.892000
57581     57581     hubei          113.2697       29.4897          122       173     2012      02        26        057              0.470125       3.791779       0.000000       0.361834   -9999.000000   -9999.000000       0.199200   -9999.000000
57581     57581     hubei          113.2697       29.4897          122       173     2012      02        27        058              0.470783       4.923767       0.000000       0.357569   -9999.000000       0.672800   -9999.000000       0.402000
57581     57581     hubei          113.2697       29.4897          122       173     2012      02        28        059              0.465083       4.872559       2.529843       0.355407   -9999.000000       0.231800   -9999.000000   -9999.000000
57581     57581     hubei          113.2697       29.4897          122       173     2012      02        29        060              0.000000   -9999.000000       1.209849   -9999.000000   -9999.000000   -9999.000000   -9999.000000   -9999.000000
57581     57581     hubei          113.2697       29.4897          122       173     2012      03        01        061              0.463125       8.650879       1.202037       0.355543   -9999.000000       0.255500       0.189200       0.569000
57581     57581     hubei          113.2697       29.4897          122       173     2012      03        02        062              0.450125       7.874908      10.819219       0.356778   -9999.000000       0.386100       0.225800   -9999.000000
57581     57581     hubei          113.2697       29.4897          122       173     2012      03        03        063              0.472375       7.352417      39.053894       0.364669   -9999.000000   -9999.000000       0.193900       0.892000
57581     57581     hubei          113.2697       29.4897          122       173     2012      03        04        064              0.471750       6.528503       9.502522       0.391667   -9999.000000       0.189900       0.244600   -9999.000000
57581     57581     hubei          113.2697       29.4897          122       173     2012      03        05        065              0.473583       4.785767       0.000000       0.397114   -9999.000000   -9999.000000   -9999.000000       1.000000
57581     57581     hubei          113.2697       29.4897          122       173     2012      03        06        066              0.473792       6.946075       4.385538       0.376968   -9999.000000       0.504800   -9999.000000       0.627000
57581     57581     hubei          113.2697       29.4897          122       173     2012      03        07        067              0.000000       7.217712       7.394879       0.375821   -9999.000000       0.323900       0.272900   -9999.000000
57581     57581     hubei          113.2697       29.4897          122       173     2012      03        08        068              0.473208       6.966888       4.576688       0.377431   -9999.000000   -9999.000000       0.259400       0.975000
57581     57581     hubei          113.2697       29.4897          122       173     2012      03        09        069              0.473042       6.163940       1.178387       0.379242   -9999.000000       0.245700       0.250900   -9999.000000
57581     57581     hubei          113.2697       29.4897          122       173     2012      03        10        070              0.475417       5.845764       0.000000       0.374452   -9999.000000   -9999.000000   -9999.000000       0.672000
57581     57581     hubei          113.2697       29.4897          122       173     2012      03        11        071              0.472292       9.774170       0.000000       0.368469   -9999.000000       0.404500   -9999.000000   -9999.000000
57581     57581     hubei          113.2697       29.4897          122       173     2012      03        12        072              0.445583       9.400024       0.253513       0.366177   -9999.000000       0.361200       0.185100   -9999.000000
57581     57581     hubei          113.2697       29.4897          122       173     2012      03        13        073              0.428087       9.600800       0.000000       0.364253   -9999.000000   -9999.000000       0.193000       0.341000
57581     57581     hubei          113.2697       29.4897          122       173     2012      03        14        074              0.425625      12.653351       2.548077       0.361708   -9999.000000       0.260200       0.227200   -9999.000000
57581     57581     hubei          113.2697       29.4897          122       173     2012      03        15        075              0.439625      12.763245       0.189370       0.363356   -9999.000000       0.410800       0.205600       0.857000
57581     57581     hubei          113.2697       29.4897          122       173     2012      03        16        076              0.427783      11.863129       0.127567       0.364602   -9999.000000   -9999.000000   -9999.000000   -9999.000000
57581     57581     hubei          113.2697       29.4897          122       173     2012      03        17        077              0.424958      10.977234       0.470119       0.361936   -9999.000000       0.646300   -9999.000000   -9999.000000
57581     57581     hubei          113.2697       29.4897          122       173     2012      03        18        078              0.428708      11.795990       8.178615       0.361548   -9999.000000   -9999.000000       0.207900       0.671000
57581     57581     hubei          113.2697       29.4897          122       173     2012      03        19        079              0.426708      15.056152       1.255532       0.367033   -9999.000000       0.783100       0.297600   -9999.000000
57581     57581     hubei          113.2697       29.4897          122       173     2012      03        20        080              0.423565       9.333588       0.117165       0.366586   -9999.000000       0.413400       0.284500       0.526000
57581     57581     hubei          113.2697       29.4897          122       173     2012      03        21        081              0.424583       7.784393       2.493357       0.362407   -9999.000000   -9999.000000       0.296200   -9999.000000
57581     57581     hubei          113.2697       29.4897          122       173     2012      03        22        082              0.472375      10.085114      34.444759       0.362557   -9999.000000       0.375800   -9999.000000       0.675000
57581     57581     hubei          113.2697       29.4897          122       173     2012      03        23        083              0.477625       7.674286       0.119732       0.395562   -9999.000000   -9999.000000   -9999.000000       0.904000
57581     57581     hubei          113.2697       29.4897          122       173     2012      03        24        084              0.477417      12.552643       0.965301       0.373164   -9999.000000       0.207300   -9999.000000   -9999.000000
57581     57581     hubei          113.2697       29.4897          122       173     2012      03        25        085              0.000000      13.989258       0.000000       0.365025   -9999.000000       0.655000       0.285600       0.124000
57581     57581     hubei          113.2697       29.4897          122       173     2012      03        26        086              0.430750      16.208344       0.000000       0.362029   -9999.000000   -9999.000000       0.296800   -9999.000000
57581     57581     hubei          113.2697       29.4897          122       173     2012      03        27        087              0.428500      18.203369       0.423519       0.359788   -9999.000000       0.426700   -9999.000000       0.018000
57581     57581     hubei          113.2697       29.4897          122       173     2012      03        28        088              0.426125      19.882538       1.008186       0.358266   -9999.000000   -9999.000000   -9999.000000   -9999.000000
57581     57581     hubei          113.2697       29.4897          122       173     2012      03        29        089              0.438417      19.400024      15.132438       0.359846   -9999.000000       0.289200       0.326500   -9999.000000
57581     57581     hubei          113.2697       29.4897          122       173     2012      03        30        090              0.481792      17.447357       5.740059       0.373275   -9999.000000       0.188100       0.352900       0.425000
57581     57581     hubei          113.2697       29.4897          122       173     2012      03        31        091              0.478208      15.666412       0.000000       0.377420   -9999.000000   -9999.000000       0.389000   -9999.000000
57581     57581     hubei          113.2697       29.4897          122       173     2012      04        01        092              0.440208      17.232147       0.192692       0.361428   -9999.000000       0.249600       0.321200       0.260000
57581     57581     hubei          113.2697       29.4897          122       173     2012      04        02        093              0.430417      18.789551       0.292128       0.357330       0.180000   -9999.000000   -9999.000000   -9999.000000
57581     57581     hubei          113.2697       29.4897          122       173     2012      04        03        094              0.421458      20.616516       0.158208       0.354941   -9999.000000       0.308100   -9999.000000       0.579000
57581     57581     hubei          113.2697       29.4897          122       173     2012      04        04        095              0.422583      17.565369       9.246843       0.353421   -9999.000000       0.237900       0.239000       0.167000
57581     57581     hubei          113.2697       29.4897          122       173     2012      04        05        096              0.423792      14.170746       0.000000       0.370363   -9999.000000   -9999.000000       0.255800   -9999.000000
57581     57581     hubei          113.2697       29.4897          122       173     2012      04        06        097              0.423125      15.763580       0.044588       0.361179   -9999.000000       0.859600       0.208500       0.479000
57581     57581     hubei          113.2697       29.4897          122       173     2012      04        07        098              0.420125      19.372986       0.074931       0.357211   -9999.000000       0.426600       0.260700   -9999.000000
57581     57581     hubei          113.2697       29.4897          122       173     2012      04        08        099              0.414125      20.879944       0.298987       0.354327   -9999.000000       0.329800   -9999.000000       0.220000
57581     57581     hubei          113.2697       29.4897          122       173     2012      04        09        100              0.426750      19.099884       5.609338       0.354652   -9999.000000       0.270800   -9999.000000   -9999.000000
57581     57581     hubei          113.2697       29.4897          122       173     2012      04        10        101              0.465875      18.357147      14.774358       0.364312   -9999.000000   -9999.000000       0.189000   -9999.000000
57581     57581     hubei          113.2697       29.4897          122       173     2012      04        11        102              0.473167      19.042053       0.622026       0.376812   -9999.000000       0.189400       0.209400       0.974000
57581     57581     hubei          113.2697       29.4897          122       173     2012      04        12        103              0.479208      19.958069      36.750507       0.363425   -9999.000000   -9999.000000       0.196600   -9999.000000
57581     57581     hubei          113.2697       29.4897          122       173     2012      04        13        104              0.486750      16.151886       0.572426       0.392608   -9999.000000   -9999.000000   -9999.000000       0.589000
57581     57581     hubei          113.2697       29.4897          122       173     2012      04        14        105              0.486000      18.119293       0.703233       0.370540   -9999.000000       0.594800   -9999.000000   -9999.000000
57581     57581     hubei          113.2697       29.4897          122       173     2012      04        15        106              0.485333      15.987030       8.118911       0.367797   -9999.000000   -9999.000000       0.203700   -9999.000000
57581     57581     hubei          113.2697       29.4897          122       173     2012      04        16        107              0.477500      15.039520       0.736502       0.377140   -9999.000000       0.212800       0.295900       1.000000
57581     57581     hubei          113.2697       29.4897          122       173     2012      04        17        108              0.462750      17.562958       0.404882       0.367834   -9999.000000       0.220300       0.272200   -9999.000000
57581     57581     hubei          113.2697       29.4897          122       173     2012      04        18        109              0.444042      17.986603       1.142549       0.367041   -9999.000000   -9999.000000   -9999.000000       0.436000
57581     57581     hubei          113.2697       29.4897          122       173     2012      04        19        110              0.437542      20.091095       0.114908       0.364568   -9999.000000       0.386800   -9999.000000   -9999.000000
57581     57581     hubei          113.2697       29.4897          122       173     2012      04        20        111              0.470167      22.678467       1.572265       0.360848       0.406000       0.398900   -9999.000000       0.768000
57581     57581     hubei          113.2697       29.4897          122       173     2012      04        21        112              0.461625      18.099731       0.340569       0.364740   -9999.000000   -9999.000000       0.259100       0.853000
57581     57581     hubei          113.2697       29.4897          122       173     2012      04        22        113              0.439208      21.700287       1.630074       0.358703   -9999.000000       0.389800       0.297900   -9999.000000
57581     57581     hubei          113.2697       29.4897          122       173     2012      04        23        114              0.435542      22.745209       6.244287       0.357822       0.273000   -9999.000000       0.293700       0.487000
57581     57581     hubei          113.2697       29.4897          122       173     2012      04        24        115              0.485625      23.905060       6.790967       0.359584   -9999.000000       0.671900       0.411400   -9999.000000
57581     57581     hubei          113.2697       29.4897          122       173     2012      04        25        116              0.000000      21.028961       0.750833       0.373176   -9999.000000       0.481600   -9999.000000       0.895000
57581     57581     hubei          113.2697       29.4897          122       173     2012      04        26        117              0.467958      19.826111       0.000000       0.361888   -9999.000000   -9999.000000   -9999.000000   -9999.000000
57581     57581     hubei          113.2697       29.4897          122       173     2012      04        27        118              0.445250      22.349304       0.453027       0.353357   -9999.000000       0.492000   -9999.000000   -9999.000000
57581     57581     hubei          113.2697       29.4897          122       173     2012      04        28        119              0.469500      24.156189      26.864794       0.350764       0.299000   -9999.000000       0.418400       1.000000
57581     57581     hubei          113.2697       29.4897          122       173     2012      04        29        120              0.495833      23.789856       1.142236       0.382148   -9999.000000       0.525600       0.350300   -9999.000000
57581     57581     hubei          113.2697       29.4897          122       173     2012      04        30        121              0.495000      24.229370      37.479782       0.367230   -9999.000000   -9999.000000   -9999.000000       1.000000
57581     57581     hubei          113.2697       29.4897          122       173     2012      05        01        122              0.494875      21.780579       1.224426       0.397425   -9999.000000   -9999.000000   -9999.000000   -9999.000000
57581     57581     hubei          113.2697       29.4897          122       173     2012      05        02        123              0.496000      21.748108       0.145379       0.376211   -9999.000000       0.625800       0.300700       0.788000
57581     57581     hubei          113.2697       29.4897          122       173     2012      05        03        124              0.495458      23.232330       6.725056       0.370852   -9999.000000   -9999.000000       0.326300       0.936000
57581     57581     hubei          113.2697       29.4897          122       173     2012      05        04        125              0.497875      21.603668       0.856888       0.377562   -9999.000000       0.514300       0.336300   -9999.000000
57581     57581     hubei          113.2697       29.4897          122       173     2012      05        05        126              0.469583      24.828522       3.883408       0.367102   -9999.000000   -9999.000000       0.289500       0.765000
57581     57581     hubei          113.2697       29.4897          122       173     2012      05        06        127              0.452875      26.602722       0.000000       0.361552   -9999.000000   -9999.000000   -9999.000000   -9999.000000
57581     57581     hubei          113.2697       29.4897          122       173     2012      05        07        128              0.458083      27.893463       3.081892       0.358435   -9999.000000       0.389900   -9999.000000       0.851000
57581     57581     hubei          113.2697       29.4897          122       173     2012      05        08        129              0.463292      28.927612      11.713630       0.359784       0.339000       0.559000       0.359400   -9999.000000
57581     57581     hubei          113.2697       29.4897          122       173     2012      05        09        130              0.471833      27.235687      14.733643       0.367210   -9999.000000       0.566500       0.439300   -9999.000000
57581     57581     hubei          113.2697       29.4897          122       173     2012      05        10        131              0.474333      23.389404       0.603448       0.384325   -9999.000000   -9999.000000       0.373600       1.000000
57581     57581     hubei          113.2697       29.4897          122       173     2012      05        11        132              0.475292      26.866180      10.236733       0.364774   -9999.000000   -9999.000000   -9999.000000   -9999.000000
57581     57581     hubei          113.2697       29.4897          122       173     2012      05        12        133              0.478083      27.612000      18.862867       0.369516   -9999.000000       0.489100   -9999.000000       0.851000
57581     57581     hubei          113.2697       29.4897          122       173     2012      05        13        134              0.484708      21.829163      23.600698       0.388035   -9999.000000       0.383800   -9999.000000   -9999.000000
57581     57581     hubei          113.2697       29.4897          122       173     2012      05        14        135              0.488792      21.790070       9.943527       0.384921   -9999.000000       0.534600       0.439300   -9999.000000
57581     57581     hubei          113.2697       29.4897          122       173     2012      05        15        136              0.492292      19.283356       0.000000       0.393338   -9999.000000       0.433600       0.439300       0.756000
57581     57581     hubei          113.2697       29.4897          122       173     2012      05        16        137              0.494583      21.408539       0.195616       0.382507   -9999.000000   -9999.000000       0.438900   -9999.000000
57581     57581     hubei          113.2697       29.4897          122       173     2012      05        17        138              0.482708      23.514618       0.157920       0.376436   -9999.000000       0.573200   -9999.000000       0.503000
57581     57581     hubei          113.2697       29.4897          122       173     2012      05        18        139              0.473083      27.242584      34.097633       0.368247   -9999.000000       0.354700   -9999.000000   -9999.000000
57581     57581     hubei          113.2697       29.4897          122       173     2012      05        19        140              0.495458      25.244659       0.214004       0.382719   -9999.000000   -9999.000000       0.439300       0.500000
57581     57581     hubei          113.2697       29.4897          122       173     2012      05        20        141              0.496500      24.749908       1.129003       0.381725   -9999.000000       0.833000       0.439300       0.706000
57581     57581     hubei          113.2697       29.4897          122       173     2012      05        21        142              0.485500      25.473999       0.258816       0.371159   -9999.000000   -9999.000000       0.384900   -9999.000000
57581     57581     hubei          113.2697       29.4897          122       173     2012      05        22        143              0.471917      26.238647      17.209280       0.365810       0.499500   -9999.000000       0.428700       0.789000
57581     57581     hubei          113.2697       29.4897          122       173     2012      05        23        144              0.491458      23.093048      13.138379       0.381766   -9999.000000       0.618100   -9999.000000   -9999.000000
57581     57581     hubei          113.2697       29.4897          122       173     2012      05        24        145              0.494333      21.740997      25.267025       0.382106   -9999.000000   -9999.000000   -9999.000000       1.000000
57581     57581     hubei          113.2697       29.4897          122       173     2012      05        25        146              0.000000      20.591217       0.372188       0.396507   -9999.000000       0.411600       0.439300   -9999.000000
57581     57581     hubei          113.2697       29.4897          122       173     2012      05        26        147              0.496375      20.964783       0.788615       0.387518   -9999.000000       0.671000       0.439300   -9999.000000
57581     57581     hubei          113.2697       29.4897          122       173     2012      05        27        148              0.497542      23.980682       0.207305       0.379021   -9999.000000       0.571100       0.430500       0.319000
57581     57581     hubei          113.2697       29.4897          122       173     2012      05        28        149              0.496583      26.013306       1.140409       0.372712   -9999.000000       0.294700   -9999.000000   -9999.000000
57581     57581     hubei          113.2697       29.4897          122       173     2012      05        29        150              0.496167      26.916901      17.923185       0.367327       0.500000   -9999.000000   -9999.000000       0.934000
57581     57581     hubei          113.2697       29.4897          122       173     2012      05        30        151              0.497375      23.027405       0.367573       0.383461   -9999.000000       0.523600   -9999.000000   -9999.000000
57581     57581     hubei          113.2697       29.4897          122       173     2012      05        31        152              0.498125      25.341644       2.352723       0.368701   -9999.000000       0.502100   -9999.000000   -9999.000000
57581     57581     hubei          113.2697       29.4897          122       173     2012      06        01        153              0.496750      25.890747       5.121438       0.365338   -9999.000000       0.498300       0.439300       0.592000
57581     57581     hubei          113.2697       29.4897          122       173     2012      06        02        154              0.497708      22.872162       0.691657       0.372531   -9999.000000       0.732700       0.438900   -9999.000000
57581     57581     hubei          113.2697       29.4897          122       173     2012      06        03        155              0.493875      25.710541       2.887531       0.361796       0.497000   -9999.000000   -9999.000000       0.798000
57581     57581     hubei          113.2697       29.4897          122       173     2012      06        04        156              0.495083      24.319305       6.104135       0.365274   -9999.000000       0.727900   -9999.000000   -9999.000000
57581     57581     hubei          113.2697       29.4897          122       173     2012      06        05        157              0.496375      23.412903       3.512834       0.372019   -9999.000000       0.883100       0.330200       0.729000
57581     57581     hubei          113.2697       29.4897          122       173     2012      06        06        158              0.496750      25.840210       3.385119       0.366053   -9999.000000   -9999.000000       0.311100   -9999.000000
57581     57581     hubei          113.2697       29.4897          122       173     2012      06        07        159              0.498292      25.805115       2.737959       0.368470   -9999.000000       0.623700       0.232200   -9999.000000
57581     57581     hubei          113.2697       29.4897          122       173     2012      06        08        160              0.498917      26.690979       0.000000       0.366036       0.500000   -9999.000000       0.300300       1.000000
57581     57581     hubei          113.2697       29.4897          122       173     2012      06        09        161              0.484500      27.800903       0.206144       0.358689   -9999.000000   -9999.000000   -9999.000000   -9999.000000
57581     57581     hubei          113.2697       29.4897          122       173     2012      06        10        162              0.477333      29.125183      12.092654       0.356489   -9999.000000       0.395500   -9999.000000       1.000000
57581     57581     hubei          113.2697       29.4897          122       173     2012      06        11        163              0.000000      27.229523       0.000000       0.373390   -9999.000000   -9999.000000       0.335600   -9999.000000
57581     57581     hubei          113.2697       29.4897          122       173     2012      06        12        164              0.482583      28.011597       0.863217       0.361141   -9999.000000       0.408800       0.335500   -9999.000000
57581     57581     hubei          113.2697       29.4897          122       173     2012      06        13        165              0.477500      28.192352       0.927477       0.353853   -9999.000000   -9999.000000       0.347400       1.000000
57581     57581     hubei          113.2697       29.4897          122       173     2012      06        14        166              0.472375      29.196625       0.195384       0.350113   -9999.000000   -9999.000000   -9999.000000   -9999.000000
57581     57581     hubei          113.2697       29.4897          122       173     2012      06        15        167              0.469625      28.018463       0.000000       0.351227   -9999.000000       0.374500   -9999.000000       0.580000
57581     57581     hubei          113.2697       29.4897          122       173     2012      06        16        168              0.465708      29.064331      13.781585       0.346122   -9999.000000   -9999.000000       0.260700   -9999.000000
57581     57581     hubei          113.2697       29.4897          122       173     2012      06        17        169              0.450042      28.375031       4.631276       0.342295   -9999.000000       0.434700       0.294100       0.431000
57581     57581     hubei          113.2697       29.4897          122       173     2012      06        18        170              0.414375      29.433014       0.000000       0.338276   -9999.000000       0.405000       0.354400       0.848000
57581     57581     hubei          113.2697       29.4897          122       173     2012      06        19        171              0.366375      29.391083       0.398285       0.335404   -9999.000000       0.298800       0.369500   -9999.000000
57581     57581     hubei          113.2697       29.4897          122       173     2012      06        20        172              0.318667      30.123596       0.000000       0.331299   -9999.000000       0.434800   -9999.000000       0.245000
57581     57581     hubei          113.2697       29.4897          122       173     2012      06        21        173              0.281792      30.774170       0.342242       0.329121   -9999.000000   -9999.000000   -9999.000000   -9999.000000
57581     57581     hubei          113.2697       29.4897          122       173     2012      06        22        174              0.256750      30.756866       0.662704       0.328006   -9999.000000       0.679600       0.322500       0.257000
57581     57581     hubei          113.2697       29.4897          122       173     2012      06        23        175              0.232667      30.360565       1.520082       0.326187       0.481000   -9999.000000       0.330300   -9999.000000
57581     57581     hubei          113.2697       29.4897          122       173     2012      06        24        176              0.215708      29.653259       0.090981       0.327291       0.445000   -9999.000000       0.276000   -9999.000000
57581     57581     hubei          113.2697       29.4897          122       173     2012      06        25        177              0.245750      30.684723      52.287876       0.323527       0.499000       0.381100       0.272600       0.743000
57581     57581     hubei          113.2697       29.4897          122       173     2012      06        26        178              0.494042      28.642090      77.241898       0.376214   -9999.000000   -9999.000000   -9999.000000   -9999.000000
57581     57581     hubei          113.2697       29.4897          122       173     2012      06        27        179              0.496417      27.441193      56.544968       0.419821       0.500000       0.606500   -9999.000000       1.000000
57581     57581     hubei          113.2697       29.4897          122       173     2012      06        28        180              0.497696      28.030914       1.865113       0.485125       0.500000       0.688100       0.250500   -9999.000000
57581     57581     hubei          113.2697       29.4897          122       173     2012      06        29        181              0.500042      28.259766       2.924850       0.571823       0.494000   -9999.000000       0.266800   -9999.000000
57581     57581     hubei          113.2697       29.4897          122       173     2012      06        30        182              0.501792      30.986572       0.735700       0.426542       0.494000       0.517600       0.279500   -9999.000000
57581     57581     hubei          113.2697       29.4897          122       173     2012      07        01        183              0.501409      31.054840       2.757960       0.386019   -9999.000000       0.454300   -9999.000000   -9999.000000
57581     57581     hubei          113.2697       29.4897          122       173     2012      07        02        184              0.479833      30.798035       0.000000       0.374068   -9999.000000   -9999.000000   -9999.000000       0.601000
57581     57581     hubei          113.2697       29.4897          122       173     2012      07        03        185              0.460542      31.100037       0.000000       0.363854       0.496000       0.514600       0.344400   -9999.000000
57581     57581     hubei          113.2697       29.4897          122       173     2012      07        04        186              0.413208      31.378021       0.000000       0.357991       0.494000   -9999.000000       0.384400       0.425000
57581     57581     hubei          113.2697       29.4897          122       173     2012      07        05        187              0.343375      31.269348       0.438354       0.353985       0.496000       0.410400       0.439300   -9999.000000
57581     57581     hubei          113.2697       29.4897          122       173     2012      07        06        188              0.284875      31.236908       0.000000       0.350770   -9999.000000       0.909600       0.438900   -9999.000000
57581     57581     hubei          113.2697       29.4897          122       173     2012      07        07        189              0.239208      32.377472       0.000000       0.345604   -9999.000000   -9999.000000   -9999.000000       0.980000
57581     57581     hubei          113.2697       29.4897          122       173     2012      07        08        190              0.208917      31.587982       0.000000       0.340549   -9999.000000       0.236300   -9999.000000   -9999.000000
57581     57581     hubei          113.2697       29.4897          122       173     2012      07        09        191              0.184958      31.984619       0.000000       0.335230       0.487000   -9999.000000       0.378800       0.315000
57581     57581     hubei          113.2697       29.4897          122       173     2012      07        10        192              0.168750      31.413239       0.265296       0.331776       0.497500       0.663400       0.438800   -9999.000000
57581     57581     hubei          113.2697       29.4897          122       173     2012      07        11        193              0.155750      31.480377       0.440970       0.328624   -9999.000000       0.199700       0.439600   -9999.000000
57581     57581     hubei          113.2697       29.4897          122       173     2012      07        12        194              0.314250      32.417572      47.142025       0.325259   -9999.000000   -9999.000000       0.195200       1.000000
57581     57581     hubei          113.2697       29.4897          122       173     2012      07        13        195              0.495609      30.661346      35.813122       0.390912   -9999.000000       0.435100   -9999.000000   -9999.000000
57581     57581     hubei          113.2697       29.4897          122       173     2012      07        14        196              0.497542      28.121063       0.910316       0.393525       0.500000   -9999.000000   -9999.000000       0.651000
57581     57581     hubei          113.2697       29.4897          122       173     2012      07        15        197              0.499250      29.372650       3.074394       0.375611       0.500000       0.604100       0.439300   -9999.000000
57581     57581     hubei          113.2697       29.4897          122       173     2012      07        16        198              0.494875      30.380249       2.249077       0.358575   -9999.000000       0.286700       0.439300       0.708000
57581     57581     hubei          113.2697       29.4897          122       173     2012      07        17        199              0.474208      29.007111       1.756193       0.357202   -9999.000000   -9999.000000       0.439900       0.735000
57581     57581     hubei          113.2697       29.4897          122       173     2012      07        18        200              0.467875      29.767670       1.773725       0.356470   -9999.000000       0.419300   -9999.000000   -9999.000000
57581     57581     hubei          113.2697       29.4897          122       173     2012      07        19        201              0.462458      29.387177       1.556577       0.355694       0.500000   -9999.000000   -9999.000000       0.673000
57581     57581     hubei          113.2697       29.4897          122       173     2012      07        20        202              0.448958      29.763916       0.894898       0.353124       0.500000       0.561700       0.439300   -9999.000000
57581     57581     hubei          113.2697       29.4897          122       173     2012      07        21        203              0.399136      31.758545       0.000000       0.345117       0.500000       0.371200       0.439300       0.277000
57581     57581     hubei          113.2697       29.4897          122       173     2012      07        22        204              0.328167      32.645905       2.300706       0.339753   -9999.000000   -9999.000000       0.439300   -9999.000000
57581     57581     hubei          113.2697       29.4897          122       173     2012      07        23        205              0.274542      33.090057       2.668858       0.336666   -9999.000000       0.289700       0.439900       0.560000
57581     57581     hubei          113.2697       29.4897          122       173     2012      07        24        206              0.243875      32.107056       0.304188       0.340084   -9999.000000       0.470200   -9999.000000       0.179000
57581     57581     hubei          113.2697       29.4897          122       173     2012      07        25        207              0.218208      32.809143       0.000000       0.334902       0.494000   -9999.000000   -9999.000000   -9999.000000
57581     57581     hubei          113.2697       29.4897          122       173     2012      07        26        208              0.201208      32.591492       0.898688       0.329768       0.496000       0.215400       0.439300       0.448000
57581     57581     hubei          113.2697       29.4897          122       173     2012      07        27        209              0.189042      32.371979       0.639596       0.326745   -9999.000000   -9999.000000       0.439300   -9999.000000
57581     57581     hubei          113.2697       29.4897          122       173     2012      07        28        210              0.180375      32.537994       0.757080       0.324354   -9999.000000       0.240700       0.438900       0.708000
57581     57581     hubei          113.2697       29.4897          122       173     2012      07        29        211              0.174167      31.870728       0.235230       0.324968   -9999.000000       0.348000   -9999.000000       0.160000
57581     57581     hubei          113.2697       29.4897          122       173     2012      07        30        212              0.170333      32.742065       1.027732       0.320925       0.488000   -9999.000000   -9999.000000   -9999.000000
57581     57581     hubei          113.2697       29.4897          122       173     2012      07        31        213              0.169917      32.648560       0.517380       0.320124       0.496000       0.250500   -9999.000000       0.586000
57581     57581     hubei          113.2697       29.4897          122       173     2012      08        01        214              0.165125      33.218933       1.740461       0.317732       0.500000   -9999.000000       0.439300   -9999.000000
57581     57581     hubei          113.2697       29.4897          122       173     2012      08        02        215              0.159792      32.366180       1.692273       0.322202   -9999.000000       0.357600       0.439300       0.540000
57581     57581     hubei          113.2697       29.4897          122       173     2012      08        03        216              0.157292      31.132996      10.659550       0.317640   -9999.000000       0.334700       0.439900   -9999.000000
57581     57581     hubei          113.2697       29.4897          122       173     2012      08        04        217              0.371625      30.429321      63.536980       0.323473   -9999.000000   -9999.000000   -9999.000000   -9999.000000
57581     57581     hubei          113.2697       29.4897          122       173     2012      08        05        218              0.497750      28.819244       1.801569       0.416129       0.500000       0.273500   -9999.000000       1.000000
57581     57581     hubei          113.2697       29.4897          122       173     2012      08        06        219              0.487667      30.935303      12.386252       0.373344       0.500000   -9999.000000       0.439300   -9999.000000
57581     57581     hubei          113.2697       29.4897          122       173     2012      08        07        220              0.461917      31.683075       0.000000       0.354233   -9999.000000   -9999.000000       0.439900       0.605000
57581     57581     hubei          113.2697       29.4897          122       173     2012      08        08        221              0.443125      31.498901       0.000000       0.344130   -9999.000000       0.374900       0.439600   -9999.000000
57581     57581     hubei          113.2697       29.4897          122       173     2012      08        09        222              0.439917      30.947235       0.478781       0.338203   -9999.000000   -9999.000000       0.439900   -9999.000000
57581     57581     hubei          113.2697       29.4897          122       173     2012      08        10        223              0.436375      30.366638       2.069456       0.336660   -9999.000000       0.515400   -9999.000000       1.000000
57581     57581     hubei          113.2697       29.4897          122       173     2012      08        11        224              0.437667      28.674469       2.917499       0.340141       0.500000       0.610900   -9999.000000   -9999.000000
57581     57581     hubei          113.2697       29.4897          122       173     2012      08        12        225              0.450458      29.658600       0.185011       0.340837   -9999.000000       0.251100       0.439300       0.958000
57581     57581     hubei          113.2697       29.4897          122       173     2012      08        13        226              0.451792      30.455841       2.695861       0.339862   -9999.000000       0.295300       0.439300   -9999.000000
57581     57581     hubei          113.2697       29.4897          122       173     2012      08        14        227              0.451083      29.752930       1.040309       0.342185   -9999.000000   -9999.000000       0.438900       0.646000
57581     57581     hubei          113.2697       29.4897          122       173     2012      08        15        228              0.448542      29.288025       1.005655       0.337370       0.500000       0.484600   -9999.000000       0.722000
57581     57581     hubei          113.2697       29.4897          122       173     2012      08        16        229              0.446500      30.907349       2.466761       0.332727       0.498500       0.405500   -9999.000000   -9999.000000
57581     57581     hubei          113.2697       29.4897          122       173     2012      08        17        230              0.448917      30.956177       7.142260       0.329651   -9999.000000   -9999.000000       0.439300       0.687000
57581     57581     hubei          113.2697       29.4897          122       173     2012      08        18        231              0.450292      31.235870       0.000000       0.341898   -9999.000000       0.527400       0.439300   -9999.000000
57581     57581     hubei          113.2697       29.4897          122       173     2012      08        19        232              0.447250      32.220734       0.000000       0.334731   -9999.000000   -9999.000000       0.439300       0.427000
57581     57581     hubei          113.2697       29.4897          122       173     2012      08        20        233              0.444458      32.655792       4.174636       0.327993   -9999.000000       0.247600       0.439900   -9999.000000
57581     57581     hubei          113.2697       29.4897          122       173     2012      08        21        234              0.441292      32.437256       2.788286       0.327227   -9999.000000       0.379600   -9999.000000   -9999.000000
57581     57581     hubei          113.2697       29.4897          122       173     2012      08        22        235              0.439708      26.875885       0.462222       0.342144   -9999.000000   -9999.000000   -9999.000000   -9999.000000
57581     57581     hubei          113.2697       29.4897          122       173     2012      08        23        236              0.438750      24.439545       3.061010       0.337387   -9999.000000       0.171400       0.439300   -9999.000000
57581     57581     hubei          113.2697       29.4897          122       173     2012      08        24        237              0.435208      24.460602       0.000000       0.335275   -9999.000000   -9999.000000       0.439300       0.705000
57581     57581     hubei          113.2697       29.4897          122       173     2012      08        25        238              0.000000      26.720795       0.000000       0.331608   -9999.000000   -9999.000000       0.439600   -9999.000000
57581     57581     hubei          113.2697       29.4897          122       173     2012      08        26        239              0.399625      28.498291       0.000000       0.327453       0.500000       0.335400       0.439900       0.990000
57581     57581     hubei          113.2697       29.4897          122       173     2012      08        27        240              0.382083      28.681274       0.000000       0.324493   -9999.000000   -9999.000000   -9999.000000       0.470000
57581     57581     hubei          113.2697       29.4897          122       173     2012      08        28        241              0.365667      27.898193       0.000000       0.323490   -9999.000000       0.427300   -9999.000000   -9999.000000
57581     57581     hubei          113.2697       29.4897          122       173     2012      08        29        242              0.351208      28.723389       0.162155       0.320793       0.500000       0.516400       0.408400       0.662000
57581     57581     hubei          113.2697       29.4897          122       173     2012      08        30        243              0.340792      29.787689       0.665348       0.317334   -9999.000000       0.315100       0.439900   -9999.000000
57581     57581     hubei          113.2697       29.4897          122       173     2012      08        31        244              0.332958      30.614227       0.134281       0.315157   -9999.000000       0.283900       0.438900       0.919000
57581     57581     hubei          113.2697       29.4897          122       173     2012      09        01        245              0.326958      31.325500       1.126430       0.312148       0.498500   -9999.000000   -9999.000000   -9999.000000
57581     57581     hubei          113.2697       29.4897          122       173     2012      09        02        246              0.323625      31.739136       4.055136       0.309551       0.500000       0.390500   -9999.000000   -9999.000000
57581     57581     hubei          113.2697       29.4897          122       173     2012      09        03        247              0.321958      26.694916       0.706793       0.316674   -9999.000000       0.392700       0.251400       0.982000
57581     57581     hubei          113.2697       29.4897          122       173     2012      09        04        248              0.319000      26.945740       0.862298       0.322165   -9999.000000   -9999.000000       0.299700   -9999.000000
57581     57581     hubei          113.2697       29.4897          122       173     2012      09        05        249              0.315458      27.339783       0.509119       0.314660   -9999.000000       0.287800       0.303900       0.621000
57581     57581     hubei          113.2697       29.4897          122       173     2012      09        06        250              0.312833      27.285339       0.309771       0.309937       0.500000   -9999.000000       0.329800   -9999.000000
57581     57581     hubei          113.2697       29.4897          122       173     2012      09        07        251              0.311042      27.963318       3.175245       0.310614       0.500000       0.448600   -9999.000000   -9999.000000
57581     57581     hubei          113.2697       29.4897          122       173     2012      09        08        252              0.317000      29.952179      54.371635       0.307261   -9999.000000       0.245200   -9999.000000       1.000000
57581     57581     hubei          113.2697       29.4897          122       173     2012      09        09        253              0.415667      28.008118       4.545341       0.365896   -9999.000000   -9999.000000       0.373100   -9999.000000
57581     57581     hubei          113.2697       29.4897          122       173     2012      09        10        254              0.418125      24.718872       0.819129       0.375013   -9999.000000       0.229900       0.439300       0.749000
57581     57581     hubei          113.2697       29.4897          122       173     2012      09        11        255              0.417042      26.614166       8.011934       0.355530       0.490000   -9999.000000       0.412400   -9999.000000
57581     57581     hubei          113.2697       29.4897          122       173     2012      09        12        256              0.446042      28.139404      11.654570       0.351673       0.500000       0.372800       0.439900       0.932000
57581     57581     hubei          113.2697       29.4897          122       173     2012      09        13        257              0.449458      23.166901       1.130261       0.369134   -9999.000000       0.433700   -9999.000000       1.000000
57581     57581     hubei          113.2697       29.4897          122       173     2012      09        14        258              0.446250      21.376099       0.412439       0.357102   -9999.000000   -9999.000000   -9999.000000   -9999.000000
57581     57581     hubei          113.2697       29.4897          122       173     2012      09        15        259              0.439542      22.956787       3.315081       0.344962   -9999.000000       0.560600       0.403100       0.632000
57581     57581     hubei          113.2697       29.4897          122       173     2012      09        16        260              0.436625      23.559143       0.065495       0.338350   -9999.000000       0.558100       0.439300   -9999.000000
57581     57581     hubei          113.2697       29.4897          122       173     2012      09        17        261              0.434583      22.932068       5.854414       0.336115   -9999.000000       0.346900       0.326100       0.910000
57581     57581     hubei          113.2697       29.4897          122       173     2012      09        18        262              0.428167      23.158203       0.000000       0.333486   -9999.000000       0.255500   -9999.000000   -9999.000000
57581     57581     hubei          113.2697       29.4897          122       173     2012      09        19        263              0.413750      24.859314       0.000000       0.330082   -9999.000000   -9999.000000   -9999.000000   -9999.000000
57581     57581     hubei          113.2697       29.4897          122       173     2012      09        20        264              0.396458      25.381531       6.358246       0.326592   -9999.000000       0.442700       0.288600       0.555000
57581     57581     hubei          113.2697       29.4897          122       173     2012      09        21        265              0.432125      26.542236      11.842409       0.332610   -9999.000000   -9999.000000       0.344200   -9999.000000
57581     57581     hubei          113.2697       29.4897          122       173     2012      09        22        266              0.436000      22.339203       0.083451       0.362446   -9999.000000       0.244600       0.380100       0.840000
57581     57581     hubei          113.2697       29.4897          122       173     2012      09        23        267              0.434000      25.058441       0.217943       0.347227       0.500000       0.447400       0.365900   -9999.000000
57581     57581     hubei          113.2697       29.4897          122       173     2012      09        24        268              0.433042      24.411255       0.240656       0.342997   -9999.000000   -9999.000000   -9999.000000       1.000000
57581     57581     hubei          113.2697       29.4897          122       173     2012      09        25        269              0.428042      24.461792       0.000000       0.340675   -9999.000000       0.245100   -9999.000000       0.751000
57581     57581     hubei          113.2697       29.4897          122       173     2012      09        26        270              0.418167      25.677765       0.315340       0.336144   -9999.000000       0.330200       0.273100   -9999.000000
57581     57581     hubei          113.2697       29.4897          122       173     2012      09        27        271              0.405571      25.189484       0.000000       0.334371   -9999.000000   -9999.000000       0.279400       0.713000
57581     57581     hubei          113.2697       29.4897          122       173     2012      09        28        272              0.370687      25.249451       0.000000       0.330438   -9999.000000   -9999.000000       0.255200   -9999.000000
57581     57581     hubei          113.2697       29.4897          122       173     2012      09        29        273              0.356417      22.608795       0.000000       0.324462   -9999.000000   -9999.000000   -9999.000000       0.423000
57581     57581     hubei          113.2697       29.4897          122       173     2012      09        30        274              0.347250      21.334412       0.409419       0.322452   -9999.000000   -9999.000000   -9999.000000   -9999.000000
57581     57581     hubei          113.2697       29.4897          122       173     2012      10        01        275              0.338417      20.877960       0.402016       0.324578   -9999.000000       0.432400   -9999.000000   -9999.000000
57581     57581     hubei          113.2697       29.4897          122       173     2012      10        02        276              0.330167      22.388916       0.220565       0.322411   -9999.000000   -9999.000000       0.206400       1.000000
57581     57581     hubei          113.2697       29.4897          122       173     2012      10        03        277              0.326458      23.473602       0.000000       0.320470   -9999.000000       0.395700       0.230700   -9999.000000
57581     57581     hubei          113.2697       29.4897          122       173     2012      10        04        278              0.324333      23.039856       2.779169       0.321670       0.426500       0.282600       0.222600       0.828000
57581     57581     hubei          113.2697       29.4897          122       173     2012      10        05        279              0.326542      22.637512       3.595690       0.328641       0.489000       0.442700   -9999.000000   -9999.000000
57581     57581     hubei          113.2697       29.4897          122       173     2012      10        06        280              0.330375      19.884521       0.286993       0.338652   -9999.000000       0.298500   -9999.000000   -9999.000000
57581     57581     hubei          113.2697       29.4897          122       173     2012      10        07        281              0.331000      22.412415       0.470715       0.332104   -9999.000000   -9999.000000       0.237200       0.833000
57581     57581     hubei          113.2697       29.4897          122       173     2012      10        08        282              0.332000      21.709717       0.562718       0.332041   -9999.000000       0.327200       0.190600   -9999.000000
57581     57581     hubei          113.2697       29.4897          122       173     2012      10        09        283              0.330500      21.011078       0.000000       0.331871       0.426000   -9999.000000       0.167500       0.411000
57581     57581     hubei          113.2697       29.4897          122       173     2012      10        10        284              0.326500      22.560425       0.243345       0.328847   -9999.000000       0.216100       0.193500   -9999.000000
57581     57581     hubei          113.2697       29.4897          122       173     2012      10        11        285              0.322208      22.990387       0.000000       0.324172   -9999.000000       0.170700   -9999.000000       0.485000
57581     57581     hubei          113.2697       29.4897          122       173     2012      10        12        286              0.319500      22.532135       0.000000       0.323286   -9999.000000   -9999.000000   -9999.000000       0.633000
57581     57581     hubei          113.2697       29.4897          122       173     2012      10        13        287              0.319833      21.391541       1.182490       0.323925   -9999.000000       0.275600       0.176700   -9999.000000
57581     57581     hubei          113.2697       29.4897          122       173     2012      10        14        288              0.321000      19.304077       4.626633       0.328484   -9999.000000       0.484100       0.206900       0.643000
57581     57581     hubei          113.2697       29.4897          122       173     2012      10        15        289              0.323125      20.676331       1.523989       0.335025   -9999.000000   -9999.000000       0.240300   -9999.000000
57581     57581     hubei          113.2697       29.4897          122       173     2012      10        16        290              0.403542      21.233978      20.739435       0.338937       0.389000       0.251400   -9999.000000       1.000000
57581     57581     hubei          113.2697       29.4897          122       173     2012      10        17        291              0.425958      18.664581       0.000000       0.372038   -9999.000000   -9999.000000   -9999.000000   -9999.000000
57581     57581     hubei          113.2697       29.4897          122       173     2012      10        18        292              0.421667      18.092773       0.158980       0.348398   -9999.000000       0.303900       0.206100   -9999.000000
57581     57581     hubei          113.2697       29.4897          122       173     2012      10        19        293              0.415583      19.719208       1.247274       0.341057   -9999.000000       0.257700       0.229300       0.661000
57581     57581     hubei          113.2697       29.4897          122       173     2012      10        20        294              0.417292      21.743286      13.918262       0.339278       0.313000   -9999.000000       0.238700   -9999.000000
57581     57581     hubei          113.2697       29.4897          122       173     2012      10        21        295              0.431417      22.945282       5.437950       0.359833       0.379000       0.309900       0.243700       1.000000
57581     57581     hubei          113.2697       29.4897          122       173     2012      10        22        296              0.431375      23.445465       0.574534       0.358820   -9999.000000   -9999.000000   -9999.000000   -9999.000000
57581     57581     hubei          113.2697       29.4897          122       173     2012      10        23        297              0.428500      16.940765       0.285709       0.350882   -9999.000000   -9999.000000   -9999.000000       0.838000
57581     57581     hubei          113.2697       29.4897          122       173     2012      10        24        298              0.427000      18.821136       2.223566       0.342789   -9999.000000       0.273300       0.221000       0.845000
57581     57581     hubei          113.2697       29.4897          122       173     2012      10        25        299              0.000000      15.976379      10.969856       0.345858       0.435000   -9999.000000       0.229500   -9999.000000
57581     57581     hubei          113.2697       29.4897          122       173     2012      10        26        300              0.448833      16.165436       0.757435       0.365470   -9999.000000       0.434500       0.210100       1.000000
57581     57581     hubei          113.2697       29.4897          122       173     2012      10        27        301              0.448958      16.957428       1.032528       0.353056   -9999.000000       0.345800       0.233300   -9999.000000
57581     57581     hubei          113.2697       29.4897          122       173     2012      10        28        302              0.000000      18.321228      13.358427       0.347669   -9999.000000       0.259100   -9999.000000       0.657000
57581     57581     hubei          113.2697       29.4897          122       173     2012      10        29        303              0.449000      20.839142      36.244194       0.353233   -9999.000000       0.358100   -9999.000000   -9999.000000
57581     57581     hubei          113.2697       29.4897          122       173     2012      10        30        304              0.448708      17.728851       0.000000       0.397178   -9999.000000   -9999.000000       0.222200   -9999.000000
57581     57581     hubei          113.2697       29.4897          122       173     2012      10        31        305              0.448625      17.280945       0.084603       0.366018   -9999.000000       0.878600       0.251200       1.000000
57581     57581     hubei          113.2697       29.4897          122       173     2012      11        01        306              0.446875      16.979034       0.000000       0.355849   -9999.000000       0.649500       0.212400   -9999.000000
57581     57581     hubei          113.2697       29.4897          122       173     2012      11        02        307              0.442500      16.537415       0.313517       0.350970   -9999.000000   -9999.000000   -9999.000000       0.603000
57581     57581     hubei          113.2697       29.4897          122       173     2012      11        03        308              0.446292      18.178467       8.967454       0.346725   -9999.000000       0.246300   -9999.000000   -9999.000000
57581     57581     hubei          113.2697       29.4897          122       173     2012      11        04        309              0.447739      14.161469       0.000000       0.363564   -9999.000000   -9999.000000       0.210200   -9999.000000
57581     57581     hubei          113.2697       29.4897          122       173     2012      11        05        310              0.445000      14.899048       0.572152       0.351379   -9999.000000       0.364900       0.239500       0.841000
57581     57581     hubei          113.2697       29.4897          122       173     2012      11        06        311              0.440292      14.093018       0.176694       0.348917   -9999.000000       0.336700       0.255800   -9999.000000
57581     57581     hubei          113.2697       29.4897          122       173     2012      11        07        312              0.438417      14.853851       2.336892       0.345751   -9999.000000   -9999.000000       0.235600       0.559000
57581     57581     hubei          113.2697       29.4897          122       173     2012      11        08        313              0.438375      14.407867       1.856722       0.348349   -9999.000000       0.296400   -9999.000000   -9999.000000
57581     57581     hubei          113.2697       29.4897          122       173     2012      11        09        314              0.444750      13.480072       8.942250       0.352462   -9999.000000   -9999.000000   -9999.000000       1.000000
57581     57581     hubei          113.2697       29.4897          122       173     2012      11        10        315              0.446625      12.366608       0.150284       0.366055   -9999.000000       0.365000       0.214900       1.000000
57581     57581     hubei          113.2697       29.4897          122       173     2012      11        11        316              0.441417      12.764832       0.000000       0.356219   -9999.000000       0.267200       0.248200   -9999.000000
57581     57581     hubei          113.2697       29.4897          122       173     2012      11        12        317              0.438333      12.759247       0.000000       0.349607   -9999.000000   -9999.000000       0.226400       0.627000
57581     57581     hubei          113.2697       29.4897          122       173     2012      11        13        318              0.000000      13.249207       0.000000       0.347636   -9999.000000       0.390800       0.264600   -9999.000000
57581     57581     hubei          113.2697       29.4897          122       173     2012      11        14        319              0.436875      15.487488       3.715039       0.345691   -9999.000000   -9999.000000   -9999.000000       0.659000
57581     57581     hubei          113.2697       29.4897          122       173     2012      11        15        320              0.443292      15.790558      31.695118       0.348838   -9999.000000       0.335700   -9999.000000   -9999.000000
57581     57581     hubei          113.2697       29.4897          122       173     2012      11        16        321              0.445000      10.900787       6.865498       0.391517   -9999.000000   -9999.000000       0.257500       1.000000
57581     57581     hubei          113.2697       29.4897          122       173     2012      11        17        322              0.000000       9.880829       0.779151       0.375379   -9999.000000   -9999.000000       0.279500       0.755000
57581     57581     hubei          113.2697       29.4897          122       173     2012      11        18        323              0.445542      11.071442       0.000000       0.362414   -9999.000000       0.679700       0.247900   -9999.000000
57581     57581     hubei          113.2697       29.4897          122       173     2012      11        19        324              0.444750      13.283417       0.295990       0.357717   -9999.000000   -9999.000000   -9999.000000       1.000000
57581     57581     hubei          113.2697       29.4897          122       173     2012      11        20        325              0.444708      13.502991      18.294668       0.356230   -9999.000000   -9999.000000   -9999.000000   -9999.000000
57581     57581     hubei          113.2697       29.4897          122       173     2012      11        21        326              0.447000      12.653961       1.645019       0.376895   -9999.000000       0.299500       0.247800       0.965000
57581     57581     hubei          113.2697       29.4897          122       173     2012      11        22        327              0.447000      11.544128      12.518559       0.371322   -9999.000000   -9999.000000       0.239900       0.920000
57581     57581     hubei          113.2697       29.4897          122       173     2012      11        23        328              0.447000      10.810944       0.000000       0.380675   -9999.000000   -9999.000000       0.267200   -9999.000000
57581     57581     hubei          113.2697       29.4897          122       173     2012      11        24        329              0.447000       9.493591       7.697893       0.367813   -9999.000000       0.342800       0.251900       0.993000
57581     57581     hubei          113.2697       29.4897          122       173     2012      11        25        330              0.447000      10.416718       4.367302       0.371845   -9999.000000   -9999.000000   -9999.000000   -9999.000000
57581     57581     hubei          113.2697       29.4897          122       173     2012      11        26        331              0.447083       8.685089       0.000000       0.375388   -9999.000000       0.307100   -9999.000000       1.000000
57581     57581     hubei          113.2697       29.4897          122       173     2012      11        27        332              0.446833       9.789551       0.448896       0.366008   -9999.000000   -9999.000000       0.195800   -9999.000000
57581     57581     hubei          113.2697       29.4897          122       173     2012      11        28        333              0.446625      10.207611       0.000000       0.364589   -9999.000000       0.400100       0.208900   -9999.000000
57581     57581     hubei          113.2697       29.4897          122       173     2012      11        29        334              0.446792      10.906982       3.887295       0.362595   -9999.000000       0.440300       0.204400       1.000000
57581     57581     hubei          113.2697       29.4897          122       173     2012      11        30        335              0.447000      10.469971       1.847816       0.366417   -9999.000000   -9999.000000   -9999.000000   -9999.000000
57581     57581     hubei          113.2697       29.4897          122       173     2012      12        01        336              0.447000      10.222107       4.959553       0.365073   -9999.000000       0.422600   -9999.000000       0.883000
57581     57581     hubei          113.2697       29.4897          122       173     2012      12        02        337              0.446708       7.479340       0.000000       0.371367   -9999.000000   -9999.000000   -9999.000000   -9999.000000
57581     57581     hubei          113.2697       29.4897          122       173     2012      12        03        338              0.445958       7.178406       0.000000       0.364005   -9999.000000       0.454200       0.200400   -9999.000000
57581     57581     hubei          113.2697       29.4897          122       173     2012      12        04        339              0.441917       9.064545       0.666550       0.361488   -9999.000000       0.326600       0.208200       0.967000
57581     57581     hubei          113.2697       29.4897          122       173     2012      12        05        340              0.439167       8.567688       0.000000       0.361127   -9999.000000   -9999.000000       0.201800   -9999.000000
57581     57581     hubei          113.2697       29.4897          122       173     2012      12        06        341              0.437708       9.668732       0.915772       0.359182   -9999.000000       0.499600   -9999.000000       0.573000
57581     57581     hubei          113.2697       29.4897          122       173     2012      12        07        342              0.437000      11.368317       0.000000       0.358254   -9999.000000       0.418800   -9999.000000   -9999.000000
57581     57581     hubei          113.2697       29.4897          122       173     2012      12        08        343              0.436542      10.826843       0.000000       0.357775   -9999.000000   -9999.000000       0.201100       0.622000
57581     57581     hubei          113.2697       29.4897          122       173     2012      12        09        344              0.435583      10.757355       0.266909       0.356211   -9999.000000       0.304000       0.221500       0.885000
57581     57581     hubei          113.2697       29.4897          122       173     2012      12        10        345              0.438750       8.970001       6.275880       0.355727   -9999.000000   -9999.000000       0.149000   -9999.000000
57581     57581     hubei          113.2697       29.4897          122       173     2012      12        11        346              0.441083       6.544617       0.000000       0.365633   -9999.000000   -9999.000000       0.173800       0.799000
57581     57581     hubei          113.2697       29.4897          122       173     2012      12        12        347              0.438292       7.291168       1.943723       0.359727   -9999.000000       0.340700   -9999.000000   -9999.000000
57581     57581     hubei          113.2697       29.4897          122       173     2012      12        13        348              0.441000       8.552765       5.104942       0.359639   -9999.000000   -9999.000000   -9999.000000       0.880000
57581     57581     hubei          113.2697       29.4897          122       173     2012      12        14        349              0.442042       7.808472      10.857898       0.367586   -9999.000000       0.340800       0.179600   -9999.000000
57581     57581     hubei          113.2697       29.4897          122       173     2012      12        15        350              0.000000       5.996826       8.129172       0.372945   -9999.000000   -9999.000000       0.205200       1.000000
57581     57581     hubei          113.2697       29.4897          122       173     2012      12        16        351              0.443792       6.713715       1.194898       0.374837   -9999.000000   -9999.000000       0.187800       0.748000
57581     57581     hubei          113.2697       29.4897          122       173     2012      12        17        352              0.444000       6.718628      20.394142       0.367766   -9999.000000       0.680800   -9999.000000   -9999.000000
57581     57581     hubei          113.2697       29.4897          122       173     2012      12        18        353              0.443625       5.544739       0.000000       0.386630   -9999.000000   -9999.000000   -9999.000000       1.000000
57581     57581     hubei          113.2697       29.4897          122       173     2012      12        19        354              0.443792       4.747162       0.574113       0.371243   -9999.000000       0.386500       0.236600   -9999.000000
57581     57581     hubei          113.2697       29.4897          122       173     2012      12        20        355              0.000000       5.831909       5.724443       0.368306   -9999.000000   -9999.000000       0.256900       1.000000
57581     57581     hubei          113.2697       29.4897          122       173     2012      12        21        356              0.443417       3.412720       0.000000       0.374156   -9999.000000       0.483100       0.265400       0.606000
57581     57581     hubei          113.2697       29.4897          122       173     2012      12        22        357              0.442958       4.193298       0.000000       0.368648   -9999.000000       0.293600       0.240200   -9999.000000
57581     57581     hubei          113.2697       29.4897          122       173     2012      12        23        358              0.439583       4.102112       2.230655       0.366186   -9999.000000   -9999.000000   -9999.000000       1.000000
57581     57581     hubei          113.2697       29.4897          122       173     2012      12        24        359              0.437579       3.866333       0.218248       0.362970   -9999.000000       0.571000   -9999.000000   -9999.000000
57581     57581     hubei          113.2697       29.4897          122       173     2012      12        25        360              0.436458       5.928650       0.185795       0.363862   -9999.000000       0.771900       0.233000       0.935000
57581     57581     hubei          113.2697       29.4897          122       173     2012      12        26        361              0.000000       3.083466       1.563486       0.363224   -9999.000000   -9999.000000       0.315500   -9999.000000
57581     57581     hubei          113.2697       29.4897          122       173     2012      12        27        362              0.440727       1.632843       0.600807       0.354027   -9999.000000   -9999.000000       0.264900   -9999.000000
57581     57581     hubei          113.2697       29.4897          122       173     2012      12        28        363              0.441000       1.226929      17.704395       0.345536   -9999.000000   -9999.000000       0.306200       1.000000
57581     57581     hubei          113.2697       29.4897          122       173     2012      12        29        364              0.000000       1.796814       5.930062       0.369250   -9999.000000   -9999.000000   -9999.000000   -9999.000000
57581     57581     hubei          113.2697       29.4897          122       173     2012      12        30        365              0.000000       1.660553       0.665733       0.373789   -9999.000000       0.340100   -9999.000000       0.342000
57581     57581     hubei          113.2697       29.4897          122       173     2012      12        31        366              0.442133       2.694611       0.742100       0.355371   -9999.000000   -9999.000000       0.210000   -9999.000000
