# Supplementary material for: Research on Fusing Multisatellite Soil Moisture Data Based on Bayesian Model Averaging
Source: Hindawi journal article supplement (doi:10.1155/2018/9310838), 2018-06-25
Supplement: f1 [file 9310838.f1.zip › 2012_sm00-10cm_daily_ZDB_ZHY_57634_366days_allin.txt]

57634     57634     guizhou        107.8867       28.5242          126       152     2012      01        01        001              0.000000   -9999.000000       0.340442   -9999.000000       0.078500       0.030600   -9999.000000   -9999.000000
57634     57634     guizhou        107.8867       28.5242          126       152     2012      01        02        002              0.360000       3.687134       1.681232       0.270113       0.083000       0.132800   -9999.000000       0.002000
57634     57634     guizhou        107.8867       28.5242          126       152     2012      01        03        003              0.000000       3.951630       1.474018       0.275944   -9999.000000   -9999.000000   -9999.000000   -9999.000000
57634     57634     guizhou        107.8867       28.5242          126       152     2012      01        04        004              0.367000       2.294403       0.121184       0.271709   -9999.000000   -9999.000000       0.039800   -9999.000000
57634     57634     guizhou        107.8867       28.5242          126       152     2012      01        05        005              0.369625       2.029419       0.450718       0.253175   -9999.000000       0.109900       0.036800   -9999.000000
57634     57634     guizhou        107.8867       28.5242          126       152     2012      01        06        006              0.370000       1.234253       0.354889       0.236799   -9999.000000   -9999.000000       0.035800       0.009000
57634     57634     guizhou        107.8867       28.5242          126       152     2012      01        07        007              0.370000       1.882080       0.000000       0.248119   -9999.000000       0.146400   -9999.000000   -9999.000000
57634     57634     guizhou        107.8867       28.5242          126       152     2012      01        08        008              0.000000       2.055634       0.216502       0.252487   -9999.000000   -9999.000000   -9999.000000   -9999.000000
57634     57634     guizhou        107.8867       28.5242          126       152     2012      01        09        009              0.365696       2.709320       0.274053       0.258394   -9999.000000   -9999.000000   -9999.000000       0.155000
57634     57634     guizhou        107.8867       28.5242          126       152     2012      01        10        010              0.364000       3.764099       0.430994       0.266210       0.089500       0.237400       0.038300   -9999.000000
57634     57634     guizhou        107.8867       28.5242          126       152     2012      01        11        011              0.364000       3.864075       0.147809       0.268219       0.068000   -9999.000000       0.035400       0.060000
57634     57634     guizhou        107.8867       28.5242          126       152     2012      01        12        012              0.364273       2.318878       0.373213       0.262358   -9999.000000       0.136800       0.034300   -9999.000000
57634     57634     guizhou        107.8867       28.5242          126       152     2012      01        13        013              0.367000       2.066193       1.508455       0.258070   -9999.000000   -9999.000000   -9999.000000   -9999.000000
57634     57634     guizhou        107.8867       28.5242          126       152     2012      01        14        014              0.386391       2.752686       2.347469       0.265698   -9999.000000   -9999.000000   -9999.000000       0.265000
57634     57634     guizhou        107.8867       28.5242          126       152     2012      01        15        015              0.417542       3.456085       0.793149       0.275087   -9999.000000   -9999.000000       0.037800   -9999.000000
57634     57634     guizhou        107.8867       28.5242          126       152     2012      01        16        016              0.410905       2.826813       0.144012       0.274084   -9999.000000   -9999.000000       0.034400       0.174000
57634     57634     guizhou        107.8867       28.5242          126       152     2012      01        17        017              0.000000       2.970734       4.063766       0.269408   -9999.000000   -9999.000000       0.032700   -9999.000000
57634     57634     guizhou        107.8867       28.5242          126       152     2012      01        18        018              0.000000       3.262268       0.779333       0.275593   -9999.000000   -9999.000000   -9999.000000       0.257000
57634     57634     guizhou        107.8867       28.5242          126       152     2012      01        19        019              0.000000       3.009033       0.605345       0.277287   -9999.000000   -9999.000000   -9999.000000       0.249000
57634     57634     guizhou        107.8867       28.5242          126       152     2012      01        20        020              0.000000       2.818237       1.764972       0.271450   -9999.000000   -9999.000000   -9999.000000   -9999.000000
57634     57634     guizhou        107.8867       28.5242          126       152     2012      01        21        021              0.000000       2.186066       0.194780       0.266708   -9999.000000   -9999.000000       0.035800       0.456000
57634     57634     guizhou        107.8867       28.5242          126       152     2012      01        22        022              0.000000       1.816620       0.833235       0.257327   -9999.000000   -9999.000000       0.031800   -9999.000000
57634     57634     guizhou        107.8867       28.5242          126       152     2012      01        23        023              0.000000       1.554840       0.000000       0.240279   -9999.000000   -9999.000000       0.038600       0.369000
57634     57634     guizhou        107.8867       28.5242          126       152     2012      01        24        024              0.000000       1.202332       0.079643       0.227664   -9999.000000   -9999.000000   -9999.000000       0.453000
57634     57634     guizhou        107.8867       28.5242          126       152     2012      01        25        025              0.400286       1.602692       1.042351       0.232400   -9999.000000       0.015300   -9999.000000   -9999.000000
57634     57634     guizhou        107.8867       28.5242          126       152     2012      01        26        026              0.394739       3.521515       0.694823       0.252474   -9999.000000   -9999.000000       0.040500       0.105000
57634     57634     guizhou        107.8867       28.5242          126       152     2012      01        27        027              0.389292       2.681732       0.415666       0.256807   -9999.000000       0.204200       0.038500   -9999.000000
57634     57634     guizhou        107.8867       28.5242          126       152     2012      01        28        028              0.383545       3.209625       0.753925       0.261041       0.074000       0.286800       0.037200       0.102000
57634     57634     guizhou        107.8867       28.5242          126       152     2012      01        29        029              0.377522       4.652222       0.150653       0.266904   -9999.000000   -9999.000000       0.035800   -9999.000000
57634     57634     guizhou        107.8867       28.5242          126       152     2012      01        30        030              0.370625       4.949402       0.471990       0.267369   -9999.000000       0.072700   -9999.000000       0.002000
57634     57634     guizhou        107.8867       28.5242          126       152     2012      01        31        031              0.363000       6.002258       0.000000       0.266773       0.078000   -9999.000000   -9999.000000       0.127000
57634     57634     guizhou        107.8867       28.5242          126       152     2012      02        01        032              0.360000       7.790619       0.339116       0.265342       0.075000   -9999.000000       0.047000   -9999.000000
57634     57634     guizhou        107.8867       28.5242          126       152     2012      02        02        033              0.360000       5.445496       0.138638       0.266452       0.071000   -9999.000000       0.044200       0.065000
57634     57634     guizhou        107.8867       28.5242          126       152     2012      02        03        034              0.355870       4.259766       0.093399       0.265370   -9999.000000   -9999.000000       0.042500   -9999.000000
57634     57634     guizhou        107.8867       28.5242          126       152     2012      02        04        035              0.352000       6.039032       0.234411       0.265333   -9999.000000       0.068700   -9999.000000       0.046000
57634     57634     guizhou        107.8867       28.5242          126       152     2012      02        05        036              0.350000       6.387817       0.136524       0.265653       0.078000   -9999.000000   -9999.000000       0.080000
57634     57634     guizhou        107.8867       28.5242          126       152     2012      02        06        037              0.350778       5.641144       1.082555       0.266416       0.071500       0.108300       0.035300   -9999.000000
57634     57634     guizhou        107.8867       28.5242          126       152     2012      02        07        038              0.356783       5.738770       0.000000       0.269754       0.071000       0.303900       0.035800       0.070000
57634     57634     guizhou        107.8867       28.5242          126       152     2012      02        08        039              0.352750       5.536957       0.000000       0.265309   -9999.000000   -9999.000000       0.037700   -9999.000000
57634     57634     guizhou        107.8867       28.5242          126       152     2012      02        09        040              0.350000       2.588806       0.000000       0.250033   -9999.000000       0.041900       0.030600   -9999.000000
57634     57634     guizhou        107.8867       28.5242          126       152     2012      02        10        041              0.350000       1.252686       0.094677       0.227706   -9999.000000       0.161400   -9999.000000   -9999.000000
57634     57634     guizhou        107.8867       28.5242          126       152     2012      02        11        042              0.348250       2.152832       0.000000       0.233620   -9999.000000   -9999.000000   -9999.000000   -9999.000000
57634     57634     guizhou        107.8867       28.5242          126       152     2012      02        12        043              0.347000       2.518555       0.474494       0.244802       0.075000       0.113800   -9999.000000   -9999.000000
57634     57634     guizhou        107.8867       28.5242          126       152     2012      02        13        044              0.349739       2.763123       0.295469       0.254151   -9999.000000   -9999.000000       0.030900   -9999.000000
57634     57634     guizhou        107.8867       28.5242          126       152     2012      02        14        045              0.351909       3.514435       0.366499       0.263369   -9999.000000       0.089300   -9999.000000       0.113000
57634     57634     guizhou        107.8867       28.5242          126       152     2012      02        15        046              0.357043       4.246735       0.359579       0.266570       0.070000   -9999.000000       0.030100   -9999.000000
57634     57634     guizhou        107.8867       28.5242          126       152     2012      02        16        047              0.360000       4.594177       0.000000       0.266121       0.074000   -9999.000000   -9999.000000       0.021000
57634     57634     guizhou        107.8867       28.5242          126       152     2012      02        17        048              0.360000       4.856140       0.000000       0.264719       0.072000       0.048600   -9999.000000       0.092000
57634     57634     guizhou        107.8867       28.5242          126       152     2012      02        18        049              0.000000       4.462830       0.000000       0.262614   -9999.000000   -9999.000000       0.027100   -9999.000000
57634     57634     guizhou        107.8867       28.5242          126       152     2012      02        19        050              0.352000       2.717621       0.000000       0.255658   -9999.000000       0.165600       0.029800       0.012000
57634     57634     guizhou        107.8867       28.5242          126       152     2012      02        20        051              0.350667       3.884308       0.075250       0.259356   -9999.000000       0.340000       0.029800   -9999.000000
57634     57634     guizhou        107.8867       28.5242          126       152     2012      02        21        052              0.350000       5.283752       0.384823       0.263467       0.067000   -9999.000000   -9999.000000       0.160000
57634     57634     guizhou        107.8867       28.5242          126       152     2012      02        22        053              0.350000       5.793121       0.111944       0.265516       0.062500       0.108200   -9999.000000       0.225000
57634     57634     guizhou        107.8867       28.5242          126       152     2012      02        23        054              0.000000       8.104218       1.323341       0.265408       0.065500   -9999.000000       0.032100   -9999.000000
57634     57634     guizhou        107.8867       28.5242          126       152     2012      02        24        055              0.353471       7.169464       0.875358       0.269112       0.061000       0.211000       0.035000       0.065000
57634     57634     guizhou        107.8867       28.5242          126       152     2012      02        25        056              0.357955       7.164795       0.109639       0.269680   -9999.000000   -9999.000000       0.029500   -9999.000000
57634     57634     guizhou        107.8867       28.5242          126       152     2012      02        26        057              0.360000       4.523926       0.000000       0.267393   -9999.000000   -9999.000000       0.027600   -9999.000000
57634     57634     guizhou        107.8867       28.5242          126       152     2012      02        27        058              0.358625       3.536041       0.357057       0.261576   -9999.000000   -9999.000000   -9999.000000   -9999.000000
57634     57634     guizhou        107.8867       28.5242          126       152     2012      02        28        059              0.357000       3.391876       0.080964       0.260090       0.062000   -9999.000000   -9999.000000   -9999.000000
57634     57634     guizhou        107.8867       28.5242          126       152     2012      02        29        060              0.000000   -9999.000000       0.133698   -9999.000000       0.058000       0.031700   -9999.000000   -9999.000000
57634     57634     guizhou        107.8867       28.5242          126       152     2012      03        01        061              0.351500       3.334930       0.598669       0.260152   -9999.000000       0.099600       0.029400   -9999.000000
57634     57634     guizhou        107.8867       28.5242          126       152     2012      03        02        062              0.350000       5.246613       1.190032       0.265027       0.077000   -9999.000000       0.033500       0.029000
57634     57634     guizhou        107.8867       28.5242          126       152     2012      03        03        063              0.351750       5.164215       1.535056       0.267050       0.080000       0.130300   -9999.000000   -9999.000000
57634     57634     guizhou        107.8867       28.5242          126       152     2012      03        04        064              0.357000       4.409454       0.060662       0.271156       0.075000   -9999.000000   -9999.000000       0.281000
57634     57634     guizhou        107.8867       28.5242          126       152     2012      03        05        065              0.357375       4.506714       0.344850       0.269707       0.068000   -9999.000000   -9999.000000       0.264000
57634     57634     guizhou        107.8867       28.5242          126       152     2012      03        06        066              0.358043       8.176117       2.280985       0.267548   -9999.000000       0.129400       0.034300   -9999.000000
57634     57634     guizhou        107.8867       28.5242          126       152     2012      03        07        067              0.000000       5.626251       0.580098       0.272974       0.077000   -9999.000000       0.034600       0.059000
57634     57634     guizhou        107.8867       28.5242          126       152     2012      03        08        068              0.369250       4.658966       0.745670       0.271253       0.078000       0.146900       0.030400   -9999.000000
57634     57634     guizhou        107.8867       28.5242          126       152     2012      03        09        069              0.373478       4.690735       0.235356       0.269067       0.073500       0.171900   -9999.000000       0.102000
57634     57634     guizhou        107.8867       28.5242          126       152     2012      03        10        070              0.370727       5.334473       0.000000       0.266909       0.070500   -9999.000000   -9999.000000       0.199000
57634     57634     guizhou        107.8867       28.5242          126       152     2012      03        11        071              0.366250       7.396027       0.000000       0.265270   -9999.000000       0.037200       0.029400   -9999.000000
57634     57634     guizhou        107.8867       28.5242          126       152     2012      03        12        072              0.357682       8.377167       0.346468       0.263705   -9999.000000   -9999.000000       0.035500       0.122000
57634     57634     guizhou        107.8867       28.5242          126       152     2012      03        13        073              0.345750       9.102722       0.000000       0.261659       0.068500       0.100000       0.035100   -9999.000000
57634     57634     guizhou        107.8867       28.5242          126       152     2012      03        14        074              0.337174      12.672363       0.415829       0.258015       0.073000   -9999.000000   -9999.000000       0.023000
57634     57634     guizhou        107.8867       28.5242          126       152     2012      03        15        075              0.339375      10.070038       0.099859       0.260214       0.072000   -9999.000000   -9999.000000   -9999.000000
57634     57634     guizhou        107.8867       28.5242          126       152     2012      03        16        076              0.335292      11.874176       0.849083       0.260678       0.069000   -9999.000000   -9999.000000       0.075000
57634     57634     guizhou        107.8867       28.5242          126       152     2012      03        17        077              0.332417      14.781586       3.403658       0.260124   -9999.000000       0.032000       0.031700       0.135000
57634     57634     guizhou        107.8867       28.5242          126       152     2012      03        18        078              0.330333      16.257233       0.138967       0.259334       0.067000       0.060300       0.035400   -9999.000000
57634     57634     guizhou        107.8867       28.5242          126       152     2012      03        19        079              0.331583      15.621521       0.245902       0.258592       0.070500       0.145800       0.035900       0.099000
57634     57634     guizhou        107.8867       28.5242          126       152     2012      03        20        080              0.331083      15.850220       0.310507       0.259341       0.072500   -9999.000000   -9999.000000   -9999.000000
57634     57634     guizhou        107.8867       28.5242          126       152     2012      03        21        081              0.337579      12.680054       1.851333       0.259475       0.084000       0.334400   -9999.000000       0.294000
57634     57634     guizhou        107.8867       28.5242          126       152     2012      03        22        082              0.401500      10.118256      22.552759       0.264416   -9999.000000   -9999.000000   -9999.000000       0.480000
57634     57634     guizhou        107.8867       28.5242          126       152     2012      03        23        083              0.411304      10.145905       0.248326       0.301069       0.083000   -9999.000000       0.039200   -9999.000000
57634     57634     guizhou        107.8867       28.5242          126       152     2012      03        24        084              0.399875      10.101624       1.003624       0.293296       0.078500       0.099900       0.038000       0.152000
57634     57634     guizhou        107.8867       28.5242          126       152     2012      03        25        085              0.000000      15.121338       0.000000       0.276109       0.073000   -9999.000000       0.036700   -9999.000000
57634     57634     guizhou        107.8867       28.5242          126       152     2012      03        26        086              0.369333      17.022736       1.036880       0.268170       0.077000       0.113100   -9999.000000       0.182000
57634     57634     guizhou        107.8867       28.5242          126       152     2012      03        27        087              0.361565      14.842743       0.634159       0.266236   -9999.000000       0.151100   -9999.000000   -9999.000000
57634     57634     guizhou        107.8867       28.5242          126       152     2012      03        28        088              0.380833      15.618195       5.374878       0.265824   -9999.000000   -9999.000000       0.058800       0.667000
57634     57634     guizhou        107.8867       28.5242          126       152     2012      03        29        089              0.411958      13.531647       5.877270       0.282631       0.087500       0.219400       0.059000       0.688000
57634     57634     guizhou        107.8867       28.5242          126       152     2012      03        30        090              0.423042      13.840454      10.848596       0.283935       0.086500   -9999.000000       0.057400   -9999.000000
57634     57634     guizhou        107.8867       28.5242          126       152     2012      03        31        091              0.413870      12.996399       0.000000       0.300533       0.077500       0.187600       0.055100       0.444000
57634     57634     guizhou        107.8867       28.5242          126       152     2012      04        01        092              0.399750      15.355682       0.000000       0.282167   -9999.000000       0.359900   -9999.000000   -9999.000000
57634     57634     guizhou        107.8867       28.5242          126       152     2012      04        02        093              0.379458      18.743744       0.721052       0.270128   -9999.000000   -9999.000000   -9999.000000       0.309000
57634     57634     guizhou        107.8867       28.5242          126       152     2012      04        03        094              0.357435      22.572815       0.441343       0.262524       0.093000       0.124200       0.054600       0.239000
57634     57634     guizhou        107.8867       28.5242          126       152     2012      04        04        095              0.341913      16.148926       0.000000       0.263195       0.085000       0.229200       0.051700   -9999.000000
57634     57634     guizhou        107.8867       28.5242          126       152     2012      04        05        096              0.328042      16.617096       0.475911       0.259789       0.082000       0.145100       0.048000       0.363000
57634     57634     guizhou        107.8867       28.5242          126       152     2012      04        06        097              0.316000      17.057556       0.517757       0.257269       0.072000       0.021200   -9999.000000   -9999.000000
57634     57634     guizhou        107.8867       28.5242          126       152     2012      04        07        098              0.310000      17.808502       0.148956       0.253582   -9999.000000   -9999.000000   -9999.000000       0.080000
57634     57634     guizhou        107.8867       28.5242          126       152     2012      04        08        099              0.312250      14.834930       5.771721       0.255770   -9999.000000       0.186500   -9999.000000   -9999.000000
57634     57634     guizhou        107.8867       28.5242          126       152     2012      04        09        100              0.350083      16.177673       3.456748       0.266612       0.097000   -9999.000000       0.067400   -9999.000000
57634     57634     guizhou        107.8867       28.5242          126       152     2012      04        10        101              0.408625      14.419739      15.211374       0.277419       0.088500   -9999.000000       0.057800       0.508000
57634     57634     guizhou        107.8867       28.5242          126       152     2012      04        11        102              0.419167      16.918823       6.725500       0.292439       0.096000       0.359500       0.062500   -9999.000000
57634     57634     guizhou        107.8867       28.5242          126       152     2012      04        12        103              0.421652      16.680725       9.049266       0.302495   -9999.000000   -9999.000000   -9999.000000       0.757000
57634     57634     guizhou        107.8867       28.5242          126       152     2012      04        13        104              0.417458      16.277802       0.595988       0.306347       0.107000       0.205600   -9999.000000   -9999.000000
57634     57634     guizhou        107.8867       28.5242          126       152     2012      04        14        105              0.411125      14.125610       0.177961       0.288018       0.088500       0.221300       0.061400       0.492000
57634     57634     guizhou        107.8867       28.5242          126       152     2012      04        15        106              0.405417      15.981598       0.758338       0.278912       0.086500   -9999.000000       0.065000       0.452000
57634     57634     guizhou        107.8867       28.5242          126       152     2012      04        16        107              0.403083      17.697021       0.254477       0.274630       0.084000       0.030700       0.080800   -9999.000000
57634     57634     guizhou        107.8867       28.5242          126       152     2012      04        17        108              0.393542      18.724762       0.000000       0.269651   -9999.000000   -9999.000000       0.071300       0.145000
57634     57634     guizhou        107.8867       28.5242          126       152     2012      04        18        109              0.378625      16.585999       0.123772       0.266950   -9999.000000       0.085800   -9999.000000   -9999.000000
57634     57634     guizhou        107.8867       28.5242          126       152     2012      04        19        110              0.376083      19.254242       1.397668       0.263484       0.091000       0.289800   -9999.000000       0.276000
57634     57634     guizhou        107.8867       28.5242          126       152     2012      04        20        111              0.409625      19.517303       0.775717       0.265757       0.085500   -9999.000000       0.073800       0.787000
57634     57634     guizhou        107.8867       28.5242          126       152     2012      04        21        112              0.389875      19.081635       0.000000       0.266370       0.119000       0.117900       0.069000   -9999.000000
57634     57634     guizhou        107.8867       28.5242          126       152     2012      04        22        113              0.352375      21.862701       0.000000       0.256773       0.112000   -9999.000000   -9999.000000       0.176000
57634     57634     guizhou        107.8867       28.5242          126       152     2012      04        23        114              0.321667      24.179443       0.000000       0.250492   -9999.000000       0.169700   -9999.000000   -9999.000000
57634     57634     guizhou        107.8867       28.5242          126       152     2012      04        24        115              0.307250      24.509491       2.160693       0.250278       0.131000       0.155400   -9999.000000       0.217000
57634     57634     guizhou        107.8867       28.5242          126       152     2012      04        25        116              0.000000      23.882416       0.485547       0.251016       0.132000   -9999.000000   -9999.000000   -9999.000000
57634     57634     guizhou        107.8867       28.5242          126       152     2012      04        26        117              0.354917      18.253662       0.000000       0.259754       0.118500       0.212000       0.092600       0.173000
57634     57634     guizhou        107.8867       28.5242          126       152     2012      04        27        118              0.329583      21.557678      14.050537       0.248582       0.104000   -9999.000000       0.085300       0.220000
57634     57634     guizhou        107.8867       28.5242          126       152     2012      04        28        119              0.405000      23.683319       8.040967       0.260870   -9999.000000   -9999.000000       0.092500   -9999.000000
57634     57634     guizhou        107.8867       28.5242          126       152     2012      04        29        120              0.417458      21.403259      26.394829       0.296898   -9999.000000       0.320100   -9999.000000       0.643000
57634     57634     guizhou        107.8867       28.5242          126       152     2012      04        30        121              0.424125      21.305145       3.164404       0.303026       0.138000   -9999.000000   -9999.000000   -9999.000000
57634     57634     guizhou        107.8867       28.5242          126       152     2012      05        01        122              0.425500      21.597412       2.654090       0.304091       0.153500       0.378600       0.064400       0.731000
57634     57634     guizhou        107.8867       28.5242          126       152     2012      05        02        123              0.422583      20.181122       6.041743       0.292339       0.145000       0.404900       0.066900       0.710000
57634     57634     guizhou        107.8867       28.5242          126       152     2012      05        03        124              0.427833      20.034607       0.942004       0.287392   -9999.000000   -9999.000000       0.064900   -9999.000000
57634     57634     guizhou        107.8867       28.5242          126       152     2012      05        04        125              0.420458      19.085266       0.000000       0.290231       0.136000       0.300900       0.060800       0.711000
57634     57634     guizhou        107.8867       28.5242          126       152     2012      05        05        126              0.411375      20.205200       0.585061       0.280019       0.133500   -9999.000000   -9999.000000   -9999.000000
57634     57634     guizhou        107.8867       28.5242          126       152     2012      05        06        127              0.402333      22.624969       0.000000       0.274615       0.135500       0.128500   -9999.000000       0.588000
57634     57634     guizhou        107.8867       28.5242          126       152     2012      05        07        128              0.387042      22.490509       0.000000       0.273331   -9999.000000       0.348200       0.054800       0.664000
57634     57634     guizhou        107.8867       28.5242          126       152     2012      05        08        129              0.379043      26.070190      32.368431       0.268573   -9999.000000   -9999.000000       0.061200   -9999.000000
57634     57634     guizhou        107.8867       28.5242          126       152     2012      05        09        130              0.426042      26.140289       3.613650       0.295516   -9999.000000       0.387000       0.058500       0.831000
57634     57634     guizhou        107.8867       28.5242          126       152     2012      05        10        131              0.420375      23.556519       0.397158       0.303727       0.131500   -9999.000000   -9999.000000   -9999.000000
57634     57634     guizhou        107.8867       28.5242          126       152     2012      05        11        132              0.420958      23.398712      28.299129       0.286373       0.156000       0.151200   -9999.000000       0.671000
57634     57634     guizhou        107.8867       28.5242          126       152     2012      05        12        133              0.439250      22.256805      13.783642       0.303895       0.166000   -9999.000000       0.066800   -9999.000000
57634     57634     guizhou        107.8867       28.5242          126       152     2012      05        13        134              0.440000      22.260956       6.216150       0.321656       0.160000   -9999.000000       0.068900       0.901000
57634     57634     guizhou        107.8867       28.5242          126       152     2012      05        14        135              0.441667      19.956879       2.973094       0.306225   -9999.000000       0.334900       0.097500       0.811000
57634     57634     guizhou        107.8867       28.5242          126       152     2012      05        15        136              0.437435      19.043182       0.512012       0.302521       0.144000       0.265100       0.088300   -9999.000000
57634     57634     guizhou        107.8867       28.5242          126       152     2012      05        16        137              0.428667      19.862488       0.338856       0.293462       0.132500   -9999.000000   -9999.000000       0.481000
57634     57634     guizhou        107.8867       28.5242          126       152     2012      05        17        138              0.420042      21.568939       7.504595       0.287128       0.135500       0.269100   -9999.000000   -9999.000000
57634     57634     guizhou        107.8867       28.5242          126       152     2012      05        18        139              0.439708      21.813629       5.991142       0.290840       0.140000   -9999.000000       0.089900       0.610000
57634     57634     guizhou        107.8867       28.5242          126       152     2012      05        19        140              0.435583      20.491150       0.000000       0.304275   -9999.000000       0.201100       0.084000       0.678000
57634     57634     guizhou        107.8867       28.5242          126       152     2012      05        20        141              0.422917      24.480774       0.000000       0.286544   -9999.000000       0.239800       0.084400   -9999.000000
57634     57634     guizhou        107.8867       28.5242          126       152     2012      05        21        142              0.424875      24.663879      20.250648       0.280575       0.232000   -9999.000000       0.053300       0.859000
57634     57634     guizhou        107.8867       28.5242          126       152     2012      05        22        143              0.443833      20.067505      10.141659       0.304495       0.227000       0.242000   -9999.000000   -9999.000000
57634     57634     guizhou        107.8867       28.5242          126       152     2012      05        23        144              0.448833      19.525177      12.098925       0.313937   -9999.000000   -9999.000000   -9999.000000       0.902000
57634     57634     guizhou        107.8867       28.5242          126       152     2012      05        24        145              0.448478      18.758514       0.763942       0.313371   -9999.000000   -9999.000000       0.051500   -9999.000000
57634     57634     guizhou        107.8867       28.5242          126       152     2012      05        25        146              0.000000      18.996979       0.251639       0.299864   -9999.000000   -9999.000000       0.052600       0.627000
57634     57634     guizhou        107.8867       28.5242          126       152     2012      05        26        147              0.438750      19.100342       0.290515       0.295335       0.190500   -9999.000000       0.049200       0.493000
57634     57634     guizhou        107.8867       28.5242          126       152     2012      05        27        148              0.434083      21.042511       0.000000       0.291118       0.184000       0.182600   -9999.000000   -9999.000000
57634     57634     guizhou        107.8867       28.5242          126       152     2012      05        28        149              0.429125      22.800873       1.542315       0.287287       0.201000   -9999.000000   -9999.000000       0.649000
57634     57634     guizhou        107.8867       28.5242          126       152     2012      05        29        150              0.450000      22.009705      22.885614       0.289109   -9999.000000       0.149600       0.048100   -9999.000000
57634     57634     guizhou        107.8867       28.5242          126       152     2012      05        30        151              0.441917      21.462524       0.391299       0.318595   -9999.000000   -9999.000000       0.045100   -9999.000000
57634     57634     guizhou        107.8867       28.5242          126       152     2012      05        31        152              0.434208      23.762360      11.786583       0.290741   -9999.000000   -9999.000000       0.056400   -9999.000000
57634     57634     guizhou        107.8867       28.5242          126       152     2012      06        01        153              0.449625      20.346375       2.805737       0.300997       0.159500       0.429700       0.048900   -9999.000000
57634     57634     guizhou        107.8867       28.5242          126       152     2012      06        02        154              0.446417      19.976746      15.981882       0.304153       0.146000   -9999.000000   -9999.000000       0.652000
57634     57634     guizhou        107.8867       28.5242          126       152     2012      06        03        155              0.458333      22.294556      41.743042       0.303830   -9999.000000       0.283100   -9999.000000   -9999.000000
57634     57634     guizhou        107.8867       28.5242          126       152     2012      06        04        156              0.454750      19.443542       1.932839       0.344049   -9999.000000       0.139900       0.045300       0.699000
57634     57634     guizhou        107.8867       28.5242          126       152     2012      06        05        157              0.452500      20.347992       1.862132       0.323923       0.192000   -9999.000000       0.050100       0.675000
57634     57634     guizhou        107.8867       28.5242          126       152     2012      06        06        158              0.455625      21.183807       0.544225       0.310532       0.173000       0.189900       0.045600   -9999.000000
57634     57634     guizhou        107.8867       28.5242          126       152     2012      06        07        159              0.458667      21.794647      14.548972       0.305341       0.159500       0.278400   -9999.000000       0.737000
57634     57634     guizhou        107.8867       28.5242          126       152     2012      06        08        160              0.454125      22.812317       0.430208       0.317762       0.151000   -9999.000000   -9999.000000   -9999.000000
57634     57634     guizhou        107.8867       28.5242          126       152     2012      06        09        161              0.453130      24.128632       2.823420       0.301623   -9999.000000       0.195800   -9999.000000       0.724000
57634     57634     guizhou        107.8867       28.5242          126       152     2012      06        10        162              0.461000      23.777222       6.216423       0.303667       0.175000   -9999.000000       0.044400   -9999.000000
57634     57634     guizhou        107.8867       28.5242          126       152     2012      06        11        163              0.000000      23.479431       0.199268       0.306031       0.126000       0.332900       0.093400       0.626000
57634     57634     guizhou        107.8867       28.5242          126       152     2012      06        12        164              0.457708      23.271729       0.000000       0.295614       0.118000       0.268100       0.094300       0.637000
57634     57634     guizhou        107.8867       28.5242          126       152     2012      06        13        165              0.456125      23.239044       1.492242       0.291439       0.116000   -9999.000000   -9999.000000   -9999.000000
57634     57634     guizhou        107.8867       28.5242          126       152     2012      06        14        166              0.458542      24.184967       0.000000       0.288848   -9999.000000       0.290400   -9999.000000       0.497000
57634     57634     guizhou        107.8867       28.5242          126       152     2012      06        15        167              0.452375      23.402618       0.000000       0.285370   -9999.000000   -9999.000000       0.090800   -9999.000000
57634     57634     guizhou        107.8867       28.5242          126       152     2012      06        16        168              0.438208      25.358368       0.158997       0.279816       0.109000       0.233800       0.091700       0.492000
57634     57634     guizhou        107.8867       28.5242          126       152     2012      06        17        169              0.398542      25.323029       1.112122       0.275773       0.107500       0.214200       0.088800       0.568000
57634     57634     guizhou        107.8867       28.5242          126       152     2012      06        18        170              0.370125      25.708008       0.196024       0.273575       0.118500   -9999.000000       0.126100   -9999.000000
57634     57634     guizhou        107.8867       28.5242          126       152     2012      06        19        171              0.341333      24.473511       0.000000       0.275442   -9999.000000       0.238300   -9999.000000       0.275000
57634     57634     guizhou        107.8867       28.5242          126       152     2012      06        20        172              0.309500      26.501465       2.879058       0.272318   -9999.000000       0.224600   -9999.000000   -9999.000000
57634     57634     guizhou        107.8867       28.5242          126       152     2012      06        21        173              0.330167      27.399170       4.492185       0.269753       0.138000   -9999.000000       0.131700       0.738000
57634     57634     guizhou        107.8867       28.5242          126       152     2012      06        22        174              0.391417      24.162689       5.142383       0.282255       0.141000       0.090300       0.127300   -9999.000000
57634     57634     guizhou        107.8867       28.5242          126       152     2012      06        23        175              0.396292      23.623962       0.000000       0.288227       0.130000   -9999.000000       0.124600       0.469000
57634     57634     guizhou        107.8867       28.5242          126       152     2012      06        24        176              0.368792      26.576477       1.323537       0.275918       0.129000       0.206800   -9999.000000       0.390000
57634     57634     guizhou        107.8867       28.5242          126       152     2012      06        25        177              0.408708      26.805115      38.105625       0.272461   -9999.000000       0.293400   -9999.000000   -9999.000000
57634     57634     guizhou        107.8867       28.5242          126       152     2012      06        26        178              0.436750      25.010651       4.596206       0.316418       0.160000   -9999.000000   -9999.000000       1.000000
57634     57634     guizhou        107.8867       28.5242          126       152     2012      06        27        179              0.442542      24.528473       7.823674       0.306172       0.156500       0.276400       0.163300   -9999.000000
57634     57634     guizhou        107.8867       28.5242          126       152     2012      06        28        180              0.448167      25.827576      31.182388       0.299981       0.150500   -9999.000000       0.172800       0.852000
57634     57634     guizhou        107.8867       28.5242          126       152     2012      06        29        181              0.441125      26.008118       0.647380       0.325760       0.130000   -9999.000000       0.163400       0.754000
57634     57634     guizhou        107.8867       28.5242          126       152     2012      06        30        182              0.428833      27.616302       3.095882       0.297659   -9999.000000       0.160900   -9999.000000   -9999.000000
57634     57634     guizhou        107.8867       28.5242          126       152     2012      07        01        183              0.402833      28.758698       0.168201       0.293654       0.149000   -9999.000000   -9999.000000       0.736000
57634     57634     guizhou        107.8867       28.5242          126       152     2012      07        02        184              0.360667      27.899506       0.000000       0.288473       0.149500       0.128800       0.108900   -9999.000000
57634     57634     guizhou        107.8867       28.5242          126       152     2012      07        03        185              0.334174      26.707581       0.000000       0.284066       0.141500   -9999.000000       0.107600       0.558000
57634     57634     guizhou        107.8867       28.5242          126       152     2012      07        04        186              0.302667      27.219757       1.968279       0.281088       0.152500       0.325500       0.111400   -9999.000000
57634     57634     guizhou        107.8867       28.5242          126       152     2012      07        05        187              0.320667      27.128143       4.262894       0.281394   -9999.000000       0.262100       0.106000   -9999.000000
57634     57634     guizhou        107.8867       28.5242          126       152     2012      07        06        188              0.286958      27.835876       0.000000       0.290726   -9999.000000   -9999.000000   -9999.000000       0.596000
57634     57634     guizhou        107.8867       28.5242          126       152     2012      07        07        189              0.272000      28.451385       0.000000       0.278451   -9999.000000       0.395300   -9999.000000   -9999.000000
57634     57634     guizhou        107.8867       28.5242          126       152     2012      07        08        190              0.257750      27.768616       0.000000       0.275865       0.134500       0.218700       0.104500       0.401000
57634     57634     guizhou        107.8867       28.5242          126       152     2012      07        09        191              0.246042      27.799438       0.000000       0.273233       0.139500       0.133100       0.088100   -9999.000000
57634     57634     guizhou        107.8867       28.5242          126       152     2012      07        10        192              0.237375      27.937714       1.153716       0.271790       0.129000       0.130200       0.084300       0.495000
57634     57634     guizhou        107.8867       28.5242          126       152     2012      07        11        193              0.289375      29.217194      55.253326       0.268794   -9999.000000   -9999.000000   -9999.000000       0.636000
57634     57634     guizhou        107.8867       28.5242          126       152     2012      07        12        194              0.402087      28.402191       4.357287       0.316251       0.223000       0.380500   -9999.000000   -9999.000000
57634     57634     guizhou        107.8867       28.5242          126       152     2012      07        13        195              0.413458      26.392029       1.605839       0.310639       0.213500       0.239800   -9999.000000       0.680000
57634     57634     guizhou        107.8867       28.5242          126       152     2012      07        14        196              0.398833      26.335419       0.000000       0.294924       0.185500   -9999.000000       0.085200   -9999.000000
57634     57634     guizhou        107.8867       28.5242          126       152     2012      07        15        197              0.383292      27.586304       2.207606       0.284385       0.203000       0.236700       0.097700       0.693000
57634     57634     guizhou        107.8867       28.5242          126       152     2012      07        16        198              0.420792      26.384552       2.630538       0.284793   -9999.000000   -9999.000000       0.124700       0.888000
57634     57634     guizhou        107.8867       28.5242          126       152     2012      07        17        199              0.419500      25.343597       0.942374       0.292428   -9999.000000       0.143300   -9999.000000   -9999.000000
57634     57634     guizhou        107.8867       28.5242          126       152     2012      07        18        200              0.438000      24.984161      19.651056       0.286961       0.269000   -9999.000000   -9999.000000       0.834000
57634     57634     guizhou        107.8867       28.5242          126       152     2012      07        19        201              0.439708      25.295654       5.739115       0.310948       0.215500   -9999.000000       0.120300   -9999.000000
57634     57634     guizhou        107.8867       28.5242          126       152     2012      07        20        202              0.429083      26.207123       0.514287       0.307925       0.197000       0.165300       0.124400       0.664000
57634     57634     guizhou        107.8867       28.5242          126       152     2012      07        21        203              0.420458      28.339905       0.000000       0.288804   -9999.000000   -9999.000000       0.116300   -9999.000000
57634     57634     guizhou        107.8867       28.5242          126       152     2012      07        22        204              0.408286      28.142395      13.534422       0.284176   -9999.000000   -9999.000000       0.112200       0.567000
57634     57634     guizhou        107.8867       28.5242          126       152     2012      07        23        205              0.441682      28.985809      45.128258       0.291624   -9999.000000   -9999.000000   -9999.000000       0.723000
57634     57634     guizhou        107.8867       28.5242          126       152     2012      07        24        206              0.441667      26.798950       4.988404       0.339236       0.293500   -9999.000000   -9999.000000   -9999.000000
57634     57634     guizhou        107.8867       28.5242          126       152     2012      07        25        207              0.441458      26.960876       0.911487       0.318469       0.268500   -9999.000000       0.182500       0.701000
57634     57634     guizhou        107.8867       28.5242          126       152     2012      07        26        208              0.434125      27.164459       1.827216       0.305792       0.242000       0.092700       0.173000   -9999.000000
57634     57634     guizhou        107.8867       28.5242          126       152     2012      07        27        209              0.427048      27.370331       1.496441       0.301752   -9999.000000   -9999.000000       0.164000       0.679000
57634     57634     guizhou        107.8867       28.5242          126       152     2012      07        28        210              0.425000      27.552216       2.991913       0.297349       0.274000       0.243000   -9999.000000       0.609000
57634     57634     guizhou        107.8867       28.5242          126       152     2012      07        29        211              0.427200      28.108398       0.101330       0.295584       0.255500   -9999.000000   -9999.000000   -9999.000000
57634     57634     guizhou        107.8867       28.5242          126       152     2012      07        30        212              0.390333      28.138916       0.000000       0.287232       0.247000       0.191800       0.149300       0.550000
57634     57634     guizhou        107.8867       28.5242          126       152     2012      07        31        213              0.323125      28.841400       5.101193       0.280902       0.246500       0.499200       0.150900   -9999.000000
57634     57634     guizhou        107.8867       28.5242          126       152     2012      08        01        214              0.368375      28.896362       3.681762       0.281875   -9999.000000   -9999.000000       0.155400       0.569000
57634     57634     guizhou        107.8867       28.5242          126       152     2012      08        02        215              0.402125      28.072388      11.898974       0.293517   -9999.000000       0.159100       0.146100   -9999.000000
57634     57634     guizhou        107.8867       28.5242          126       152     2012      08        03        216              0.374625      27.997314       0.000000       0.302986       0.226000   -9999.000000   -9999.000000   -9999.000000
57634     57634     guizhou        107.8867       28.5242          126       152     2012      08        04        217              0.307750      28.546509       0.408225       0.285797       0.237000       0.307400   -9999.000000       0.570000
57634     57634     guizhou        107.8867       28.5242          126       152     2012      08        05        218              0.331625      29.317474      10.246447       0.277940       0.273500       0.303700       0.159300   -9999.000000
57634     57634     guizhou        107.8867       28.5242          126       152     2012      08        06        219              0.398042      27.939697       0.881574       0.291437       0.259000   -9999.000000       0.195400       0.439000
57634     57634     guizhou        107.8867       28.5242          126       152     2012      08        07        220              0.378917      25.495331       2.107543       0.290411   -9999.000000       0.126300       0.184300   -9999.000000
57634     57634     guizhou        107.8867       28.5242          126       152     2012      08        08        221              0.353833      28.201996       0.286702       0.280898       0.245000   -9999.000000   -9999.000000       0.616000
57634     57634     guizhou        107.8867       28.5242          126       152     2012      08        09        222              0.301125      28.416260       3.832798       0.279118       0.219000       0.220900   -9999.000000       0.437000
57634     57634     guizhou        107.8867       28.5242          126       152     2012      08        10        223              0.272708      29.381744       0.733115       0.276009       0.244000   -9999.000000   -9999.000000   -9999.000000
57634     57634     guizhou        107.8867       28.5242          126       152     2012      08        11        224              0.242458      29.388855       0.106929       0.276890       0.186000   -9999.000000       0.183100       0.461000
57634     57634     guizhou        107.8867       28.5242          126       152     2012      08        12        225              0.221167      29.884644       1.641583       0.268458   -9999.000000       0.265400       0.187600   -9999.000000
57634     57634     guizhou        107.8867       28.5242          126       152     2012      08        13        226              0.221833      30.667023       0.882215       0.265308   -9999.000000       0.091000       0.135100       0.537000
57634     57634     guizhou        107.8867       28.5242          126       152     2012      08        14        227              0.221917      28.914978       0.208859       0.265896       0.218000       0.170700   -9999.000000       0.616000
57634     57634     guizhou        107.8867       28.5242          126       152     2012      08        15        228              0.210625      29.265778       2.428731       0.261899       0.212500       0.279300   -9999.000000   -9999.000000
57634     57634     guizhou        107.8867       28.5242          126       152     2012      08        16        229              0.199708      29.535309       0.087549       0.265060       0.211000   -9999.000000       0.140700       0.315000
57634     57634     guizhou        107.8867       28.5242          126       152     2012      08        17        230              0.194250      29.560669       0.000000       0.260484       0.213000       0.143100       0.144000   -9999.000000
57634     57634     guizhou        107.8867       28.5242          126       152     2012      08        18        231              0.188958      28.928894       0.000000       0.255163   -9999.000000       0.475500       0.137300       0.552000
57634     57634     guizhou        107.8867       28.5242          126       152     2012      08        19        232              0.186750      29.502197       0.000000       0.249283       0.208000   -9999.000000       0.131100   -9999.000000
57634     57634     guizhou        107.8867       28.5242          126       152     2012      08        20        233              0.272083      29.288300      26.083632       0.245307       0.217000       0.138900   -9999.000000       1.000000
57634     57634     guizhou        107.8867       28.5242          126       152     2012      08        21        234              0.352667      29.068024      11.936787       0.300698       0.239000   -9999.000000   -9999.000000       0.619000
57634     57634     guizhou        107.8867       28.5242          126       152     2012      08        22        235              0.356375      25.535614       2.120345       0.302047       0.207000       0.207800       0.170600   -9999.000000
57634     57634     guizhou        107.8867       28.5242          126       152     2012      08        23        236              0.337250      24.494598       0.000000       0.286870   -9999.000000       0.154400       0.172400       0.422000
57634     57634     guizhou        107.8867       28.5242          126       152     2012      08        24        237              0.300167      24.885803       0.000000       0.273425   -9999.000000   -9999.000000       0.166100   -9999.000000
57634     57634     guizhou        107.8867       28.5242          126       152     2012      08        25        238              0.000000      25.365173       1.555042       0.265483       0.218500       0.080600   -9999.000000       0.398000
57634     57634     guizhou        107.8867       28.5242          126       152     2012      08        26        239              0.270125      25.810272       0.000000       0.261449       0.218000   -9999.000000   -9999.000000       0.483000
57634     57634     guizhou        107.8867       28.5242          126       152     2012      08        27        240              0.246708      25.721466       0.000000       0.258517       0.211000       0.125900   -9999.000000   -9999.000000
57634     57634     guizhou        107.8867       28.5242          126       152     2012      08        28        241              0.228458      26.996002       0.617312       0.253412   -9999.000000       0.224800       0.152200       0.487000
57634     57634     guizhou        107.8867       28.5242          126       152     2012      08        29        242              0.247083      27.724823      13.143438       0.250848   -9999.000000   -9999.000000       0.166600   -9999.000000
57634     57634     guizhou        107.8867       28.5242          126       152     2012      08        30        243              0.361750      26.134552      19.321930       0.267077       0.262000       0.275800       0.154000       0.667000
57634     57634     guizhou        107.8867       28.5242          126       152     2012      08        31        244              0.349625      25.596283      21.156393       0.313280       0.213000       0.079700   -9999.000000       0.689000
57634     57634     guizhou        107.8867       28.5242          126       152     2012      09        01        245              0.338917      27.026184       0.807868       0.283115       0.192500       0.114500   -9999.000000   -9999.000000
57634     57634     guizhou        107.8867       28.5242          126       152     2012      09        02        246              0.319875      27.108795       0.174825       0.275202       0.182000       0.274100       0.159700       0.370000
57634     57634     guizhou        107.8867       28.5242          126       152     2012      09        03        247              0.295250      25.178223       0.237343       0.266713   -9999.000000   -9999.000000       0.121200   -9999.000000
57634     57634     guizhou        107.8867       28.5242          126       152     2012      09        04        248              0.271167      24.525116       0.000000       0.263295       0.197000       0.331200       0.126200       0.315000
57634     57634     guizhou        107.8867       28.5242          126       152     2012      09        05        249              0.254333      25.108063       0.000000       0.257532       0.202500       0.318800       0.119500   -9999.000000
57634     57634     guizhou        107.8867       28.5242          126       152     2012      09        06        250              0.244583      24.151611       0.522396       0.255930       0.194500   -9999.000000   -9999.000000       0.326000
57634     57634     guizhou        107.8867       28.5242          126       152     2012      09        07        251              0.235375      26.049866       0.000000       0.252861       0.182000       0.265200   -9999.000000       0.449000
57634     57634     guizhou        107.8867       28.5242          126       152     2012      09        08        252              0.226875      27.086609       0.644971       0.249663   -9999.000000   -9999.000000       0.122600   -9999.000000
57634     57634     guizhou        107.8867       28.5242          126       152     2012      09        09        253              0.223500      27.550140       0.874084       0.248430   -9999.000000       0.172500       0.136100       0.248000
57634     57634     guizhou        107.8867       28.5242          126       152     2012      09        10        254              0.226833      27.322693       1.731239       0.246359       0.225500       0.268000       0.180100   -9999.000000
57634     57634     guizhou        107.8867       28.5242          126       152     2012      09        11        255              0.301708      24.935760      25.093575       0.256245       0.151000   -9999.000000   -9999.000000       0.918000
57634     57634     guizhou        107.8867       28.5242          126       152     2012      09        12        256              0.369333      24.740479      15.312632       0.300776       0.198000       0.200600   -9999.000000       1.000000
57634     57634     guizhou        107.8867       28.5242          126       152     2012      09        13        257              0.364042      21.740387       0.000000       0.312354       0.141000   -9999.000000   -9999.000000   -9999.000000
57634     57634     guizhou        107.8867       28.5242          126       152     2012      09        14        258              0.347250      22.314301       0.000000       0.286639   -9999.000000       0.204700       0.185000       0.185000
57634     57634     guizhou        107.8867       28.5242          126       152     2012      09        15        259              0.324458      22.818085       2.404984       0.273401   -9999.000000       0.363200       0.167600   -9999.000000
57634     57634     guizhou        107.8867       28.5242          126       152     2012      09        16        260              0.341000      22.738098       1.011737       0.268556       0.169500   -9999.000000       0.192000       0.248000
57634     57634     guizhou        107.8867       28.5242          126       152     2012      09        17        261              0.331125      19.063568       0.000000       0.275685       0.152500       0.231300   -9999.000000   -9999.000000
57634     57634     guizhou        107.8867       28.5242          126       152     2012      09        18        262              0.315125      21.316620       0.000000       0.265758       0.149000   -9999.000000   -9999.000000       0.291000
57634     57634     guizhou        107.8867       28.5242          126       152     2012      09        19        263              0.295875      21.800781       0.000000       0.262301   -9999.000000       0.157000       0.132800       0.303000
57634     57634     guizhou        107.8867       28.5242          126       152     2012      09        20        264              0.332917      23.378235       6.847433       0.258287       0.184000       0.377800       0.144600   -9999.000000
57634     57634     guizhou        107.8867       28.5242          126       152     2012      09        21        265              0.375833      20.849182      17.554035       0.278867   -9999.000000   -9999.000000       0.140200       0.798000
57634     57634     guizhou        107.8867       28.5242          126       152     2012      09        22        266              0.371917      20.154541       3.121825       0.308702       0.186500   -9999.000000       0.141200   -9999.000000
57634     57634     guizhou        107.8867       28.5242          126       152     2012      09        23        267              0.388375      21.152008      16.889231       0.290182       0.184000   -9999.000000   -9999.000000       0.893000
57634     57634     guizhou        107.8867       28.5242          126       152     2012      09        24        268              0.383083      19.627686       3.012318       0.313238   -9999.000000   -9999.000000   -9999.000000       0.741000
57634     57634     guizhou        107.8867       28.5242          126       152     2012      09        25        269              0.383708      20.343292       6.516134       0.295840   -9999.000000       0.257800       0.098000   -9999.000000
57634     57634     guizhou        107.8867       28.5242          126       152     2012      09        26        270              0.386875      20.616852       1.685993       0.293706       0.182000   -9999.000000       0.091100       0.853000
57634     57634     guizhou        107.8867       28.5242          126       152     2012      09        27        271              0.380000      20.782318       0.000000       0.294964       0.168500       0.231900       0.083900   -9999.000000
57634     57634     guizhou        107.8867       28.5242          126       152     2012      09        28        272              0.374200      21.257660       0.000000       0.284004       0.158000   -9999.000000   -9999.000000       0.534000
57634     57634     guizhou        107.8867       28.5242          126       152     2012      09        29        273              0.369458      22.597595       0.550248       0.278092       0.143000   -9999.000000   -9999.000000   -9999.000000
57634     57634     guizhou        107.8867       28.5242          126       152     2012      09        30        274              0.362625      22.081055       0.683358       0.275452   -9999.000000       0.259100       0.081000   -9999.000000
57634     57634     guizhou        107.8867       28.5242          126       152     2012      10        01        275              0.346333      21.184692       0.000000       0.274009       0.089000   -9999.000000       0.109300       0.367000
57634     57634     guizhou        107.8867       28.5242          126       152     2012      10        02        276              0.333958      22.730194       0.699818       0.269823       0.103000       0.133000       0.125000   -9999.000000
57634     57634     guizhou        107.8867       28.5242          126       152     2012      10        03        277              0.361750      20.788879       3.841885       0.270990       0.098500   -9999.000000       0.116200       0.449000
57634     57634     guizhou        107.8867       28.5242          126       152     2012      10        04        278              0.397292      18.261017      16.075251       0.284730       0.111000   -9999.000000   -9999.000000   -9999.000000
57634     57634     guizhou        107.8867       28.5242          126       152     2012      10        05        279              0.395375      17.713013       4.534779       0.308724   -9999.000000       0.197800   -9999.000000       0.600000
57634     57634     guizhou        107.8867       28.5242          126       152     2012      10        06        280              0.388833      17.683777       1.797727       0.299187   -9999.000000       0.212900       0.132200       0.437000
57634     57634     guizhou        107.8867       28.5242          126       152     2012      10        07        281              0.407917      17.844879       8.472173       0.287452       0.130500       0.221800       0.137700   -9999.000000
57634     57634     guizhou        107.8867       28.5242          126       152     2012      10        08        282              0.408583      16.451843       5.844991       0.294787       0.110500       0.249600       0.059500       0.667000
57634     57634     guizhou        107.8867       28.5242          126       152     2012      10        09        283              0.404083      16.787628       0.134443       0.303964       0.100500   -9999.000000       0.059900   -9999.000000
57634     57634     guizhou        107.8867       28.5242          126       152     2012      10        10        284              0.402000      18.299286       0.528240       0.288170       0.102000       0.386500   -9999.000000       0.408000
57634     57634     guizhou        107.8867       28.5242          126       152     2012      10        11        285              0.402000      18.426758       2.491508       0.284931   -9999.000000       0.134100   -9999.000000       0.503000
57634     57634     guizhou        107.8867       28.5242          126       152     2012      10        12        286              0.414542      16.420532      13.511479       0.285924       0.124000       0.116000       0.060000   -9999.000000
57634     57634     guizhou        107.8867       28.5242          126       152     2012      10        13        287              0.412792      15.984467       0.577818       0.302922       0.116000       0.127600       0.063400       0.492000
57634     57634     guizhou        107.8867       28.5242          126       152     2012      10        14        288              0.407125      17.028839       0.970257       0.297804       0.132000   -9999.000000       0.062800   -9999.000000
57634     57634     guizhou        107.8867       28.5242          126       152     2012      10        15        289              0.412500      17.202789       4.782362       0.289435       0.125000       0.400100   -9999.000000       0.780000
57634     57634     guizhou        107.8867       28.5242          126       152     2012      10        16        290              0.412750      17.073517       2.180770       0.292465   -9999.000000       0.336900   -9999.000000   -9999.000000
57634     57634     guizhou        107.8867       28.5242          126       152     2012      10        17        291              0.405958      19.233795       0.000000       0.293367       0.106000   -9999.000000       0.133500       0.200000
57634     57634     guizhou        107.8867       28.5242          126       152     2012      10        18        292              0.400125      18.546417       0.000000       0.283471       0.108500       0.205100       0.134100       0.218000
57634     57634     guizhou        107.8867       28.5242          126       152     2012      10        19        293              0.395583      18.711334       1.806822       0.279623       0.109500   -9999.000000       0.141700   -9999.000000
57634     57634     guizhou        107.8867       28.5242          126       152     2012      10        20        294              0.395000      18.501190       0.864911       0.281053       0.111000       0.160500       0.132400       0.497000
57634     57634     guizhou        107.8867       28.5242          126       152     2012      10        21        295              0.400458      17.932556       3.358510       0.285165   -9999.000000       0.357900   -9999.000000   -9999.000000
57634     57634     guizhou        107.8867       28.5242          126       152     2012      10        22        296              0.406625      20.779236       0.478058       0.287240   -9999.000000   -9999.000000   -9999.000000       0.262000
57634     57634     guizhou        107.8867       28.5242          126       152     2012      10        23        297              0.399750      19.001801       0.000000       0.284733   -9999.000000       0.277200       0.052200       0.469000
57634     57634     guizhou        107.8867       28.5242          126       152     2012      10        24        298              0.396333      16.892975       3.273098       0.279425   -9999.000000   -9999.000000       0.049700   -9999.000000
57634     57634     guizhou        107.8867       28.5242          126       152     2012      10        25        299              0.000000      16.101654       0.421933       0.283318       0.164000       0.153200       0.052800       0.529000
57634     57634     guizhou        107.8867       28.5242          126       152     2012      10        26        300              0.399375      15.937836       0.067203       0.284718       0.151000   -9999.000000   -9999.000000   -9999.000000
57634     57634     guizhou        107.8867       28.5242          126       152     2012      10        27        301              0.399125      16.959503       0.000000       0.281012   -9999.000000   -9999.000000   -9999.000000       0.375000
57634     57634     guizhou        107.8867       28.5242          126       152     2012      10        28        302              0.000000      17.797913       1.003522       0.278545       0.165000   -9999.000000   -9999.000000   -9999.000000
57634     57634     guizhou        107.8867       28.5242          126       152     2012      10        29        303              0.412500      19.550751       4.688344       0.277575       0.170000       0.154100       0.133900   -9999.000000
57634     57634     guizhou        107.8867       28.5242          126       152     2012      10        30        304              0.426583      18.125854       0.189442       0.285983       0.145500       0.217000       0.132800       0.496000
57634     57634     guizhou        107.8867       28.5242          126       152     2012      10        31        305              0.416917      16.563873       0.000000       0.284728       0.133000       0.150600       0.129500   -9999.000000
57634     57634     guizhou        107.8867       28.5242          126       152     2012      11        01        306              0.411667      16.805695       0.378533       0.277368   -9999.000000   -9999.000000   -9999.000000       0.301000
57634     57634     guizhou        107.8867       28.5242          126       152     2012      11        02        307              0.413167      16.859222       8.923449       0.275506   -9999.000000       0.253700   -9999.000000   -9999.000000
57634     57634     guizhou        107.8867       28.5242          126       152     2012      11        03        308              0.429250      18.100067       4.030684       0.282921       0.133500       0.460600       0.127700       0.504000
57634     57634     guizhou        107.8867       28.5242          126       152     2012      11        04        309              0.439167      17.296143      17.083742       0.297168   -9999.000000   -9999.000000       0.147500       0.663000
57634     57634     guizhou        107.8867       28.5242          126       152     2012      11        05        310              0.435542      14.856506       3.218682       0.309612       0.135500       0.105600       0.058800   -9999.000000
57634     57634     guizhou        107.8867       28.5242          126       152     2012      11        06        311              0.433792      14.073303       6.192466       0.301772       0.133000   -9999.000000       0.055200       0.423000
57634     57634     guizhou        107.8867       28.5242          126       152     2012      11        07        312              0.437750      13.815765       4.246277       0.296185   -9999.000000       0.156900   -9999.000000   -9999.000000
57634     57634     guizhou        107.8867       28.5242          126       152     2012      11        08        313              0.434083      13.143646       1.317098       0.299120       0.151000       0.244700   -9999.000000       0.565000
57634     57634     guizhou        107.8867       28.5242          126       152     2012      11        09        314              0.431083      12.858002       0.261253       0.292616       0.141500   -9999.000000       0.056600       0.577000
57634     57634     guizhou        107.8867       28.5242          126       152     2012      11        10        315              0.428000      11.509369       0.718807       0.287796       0.129500   -9999.000000       0.058800   -9999.000000
57634     57634     guizhou        107.8867       28.5242          126       152     2012      11        11        316              0.426333      13.361786       0.334420       0.285053       0.121000   -9999.000000       0.052700       0.180000
57634     57634     guizhou        107.8867       28.5242          126       152     2012      11        12        317              0.424625      13.060486       0.000000       0.284624   -9999.000000       0.134200   -9999.000000   -9999.000000
57634     57634     guizhou        107.8867       28.5242          126       152     2012      11        13        318              0.000000      12.098907       0.000000       0.282317       0.126000   -9999.000000   -9999.000000       0.343000
57634     57634     guizhou        107.8867       28.5242          126       152     2012      11        14        319              0.419083      12.975006       0.972100       0.281094       0.140000   -9999.000000   -9999.000000   -9999.000000
57634     57634     guizhou        107.8867       28.5242          126       152     2012      11        15        320              0.419083      13.182098       4.865498       0.282735       0.138500       0.209500       0.121800       0.571000
57634     57634     guizhou        107.8867       28.5242          126       152     2012      11        16        321              0.437917      12.753662       3.123682       0.290234       0.135000       0.177200       0.109900       0.610000
57634     57634     guizhou        107.8867       28.5242          126       152     2012      11        17        322              0.000000      12.119415       0.673492       0.295043   -9999.000000       0.181500       0.107200   -9999.000000
57634     57634     guizhou        107.8867       28.5242          126       152     2012      11        18        323              0.427292      13.275330       0.313005       0.284140   -9999.000000       0.230100   -9999.000000       0.460000
57634     57634     guizhou        107.8867       28.5242          126       152     2012      11        19        324              0.423125      13.627319       0.847261       0.280854       0.140000   -9999.000000   -9999.000000   -9999.000000
57634     57634     guizhou        107.8867       28.5242          126       152     2012      11        20        325              0.424875      12.488495       0.559891       0.281467       0.145000       0.389300       0.050200       0.373000
57634     57634     guizhou        107.8867       28.5242          126       152     2012      11        21        326              0.425667      11.139191       1.552577       0.282647       0.095000       0.301300       0.053700       0.465000
57634     57634     guizhou        107.8867       28.5242          126       152     2012      11        22        327              0.429000      11.656006       0.228589       0.283859       0.099000   -9999.000000       0.052200   -9999.000000
57634     57634     guizhou        107.8867       28.5242          126       152     2012      11        23        328              0.426833      11.163086       0.000000       0.282296   -9999.000000       0.159100       0.050500       0.317000
57634     57634     guizhou        107.8867       28.5242          126       152     2012      11        24        329              0.429292       9.335785       4.577739       0.279894       0.103000   -9999.000000   -9999.000000   -9999.000000
57634     57634     guizhou        107.8867       28.5242          126       152     2012      11        25        330              0.438875       7.812408       0.916447       0.287233       0.098000       0.185000   -9999.000000       0.285000
57634     57634     guizhou        107.8867       28.5242          126       152     2012      11        26        331              0.436583       8.187592       0.181606       0.286245       0.097000       0.202200   -9999.000000   -9999.000000
57634     57634     guizhou        107.8867       28.5242          126       152     2012      11        27        332              0.432000       7.696228       0.276436       0.283297       0.102000   -9999.000000       0.045000   -9999.000000
57634     57634     guizhou        107.8867       28.5242          126       152     2012      11        28        333              0.430125       7.663696       0.000000       0.281227   -9999.000000       0.183000       0.042800       0.311000
57634     57634     guizhou        107.8867       28.5242          126       152     2012      11        29        334              0.429000       8.301514       0.109187       0.279267   -9999.000000   -9999.000000   -9999.000000   -9999.000000
57634     57634     guizhou        107.8867       28.5242          126       152     2012      11        30        335              0.426000       7.176758       1.350257       0.278366       0.106000       0.136800   -9999.000000       0.397000
57634     57634     guizhou        107.8867       28.5242          126       152     2012      12        01        336              0.426500       7.077545       0.199046       0.280349       0.111000   -9999.000000       0.044900   -9999.000000
57634     57634     guizhou        107.8867       28.5242          126       152     2012      12        02        337              0.425167       7.741638       0.000000       0.279847       0.101000   -9999.000000       0.046500       0.178000
57634     57634     guizhou        107.8867       28.5242          126       152     2012      12        03        338              0.424500       9.003967       0.000000       0.276928       0.100000   -9999.000000       0.058100       0.256000
57634     57634     guizhou        107.8867       28.5242          126       152     2012      12        04        339              0.422375       9.426361       0.000000       0.274639   -9999.000000       0.112000       0.056400   -9999.000000
57634     57634     guizhou        107.8867       28.5242          126       152     2012      12        05        340              0.418875       7.165955       0.000000       0.274604   -9999.000000       0.132000   -9999.000000       0.073000
57634     57634     guizhou        107.8867       28.5242          126       152     2012      12        06        341              0.417000       9.106873       0.547318       0.272591       0.105000       0.316900   -9999.000000   -9999.000000
57634     57634     guizhou        107.8867       28.5242          126       152     2012      12        07        342              0.414750       7.804596       0.000000       0.272240       0.104500   -9999.000000       0.055700       0.160000
57634     57634     guizhou        107.8867       28.5242          126       152     2012      12        08        343              0.414375       7.222778       1.629046       0.272562       0.103000       0.503400       0.060000       0.202000
57634     57634     guizhou        107.8867       28.5242          126       152     2012      12        09        344              0.429417       8.271820       7.657539       0.275414   -9999.000000       0.313600       0.056600   -9999.000000
57634     57634     guizhou        107.8867       28.5242          126       152     2012      12        10        345              0.442292       6.819794       1.292869       0.293011       0.104000   -9999.000000   -9999.000000       0.193000
57634     57634     guizhou        107.8867       28.5242          126       152     2012      12        11        346              0.437792       6.081848       0.106158       0.287739       0.099500       0.285900   -9999.000000   -9999.000000
57634     57634     guizhou        107.8867       28.5242          126       152     2012      12        12        347              0.433583       6.201660       4.447154       0.279880       0.106500   -9999.000000   -9999.000000       0.501000
57634     57634     guizhou        107.8867       28.5242          126       152     2012      12        13        348              0.439375       5.781525       0.258235       0.285244       0.100000       0.285300       0.042500   -9999.000000
57634     57634     guizhou        107.8867       28.5242          126       152     2012      12        14        349              0.437000       6.145325       3.493465       0.283918   -9999.000000       0.175000       0.039100       0.277000
57634     57634     guizhou        107.8867       28.5242          126       152     2012      12        15        350              0.000000       7.806671       0.470098       0.279165   -9999.000000   -9999.000000       0.036000       0.233000
57634     57634     guizhou        107.8867       28.5242          126       152     2012      12        16        351              0.429875       8.348206       0.959789       0.276932       0.105000       0.212300   -9999.000000   -9999.000000
57634     57634     guizhou        107.8867       28.5242          126       152     2012      12        17        352              0.431000       8.773102       0.565086       0.277376       0.103000   -9999.000000   -9999.000000       0.414000
57634     57634     guizhou        107.8867       28.5242          126       152     2012      12        18        353              0.429000       6.410767       0.000000       0.278776       0.100000       0.233200       0.045600   -9999.000000
57634     57634     guizhou        107.8867       28.5242          126       152     2012      12        19        354              0.426000       5.167664       3.045794       0.275369   -9999.000000       0.308000       0.043400       0.139000
57634     57634     guizhou        107.8867       28.5242          126       152     2012      12        20        355              0.000000       3.482544       0.290798       0.273480   -9999.000000   -9999.000000       0.040000       0.181000
57634     57634     guizhou        107.8867       28.5242          126       152     2012      12        21        356              0.422750       3.234283       3.843389       0.272621   -9999.000000   -9999.000000       0.042100   -9999.000000
57634     57634     guizhou        107.8867       28.5242          126       152     2012      12        22        357              0.422000       3.675476       0.480043       0.272409   -9999.000000       0.279800   -9999.000000       0.224000
57634     57634     guizhou        107.8867       28.5242          126       152     2012      12        23        358              0.418875       3.516693       0.255739       0.270920   -9999.000000       0.194000   -9999.000000   -9999.000000
57634     57634     guizhou        107.8867       28.5242          126       152     2012      12        24        359              0.417000       3.628235       0.356668       0.267338       0.086000       0.153200       0.058600       0.080000
57634     57634     guizhou        107.8867       28.5242          126       152     2012      12        25        360              0.414500       5.346466       0.266094       0.270230   -9999.000000   -9999.000000       0.060900   -9999.000000
57634     57634     guizhou        107.8867       28.5242          126       152     2012      12        26        361              0.000000       3.680420       0.239742       0.271021   -9999.000000   -9999.000000       0.057900   -9999.000000
57634     57634     guizhou        107.8867       28.5242          126       152     2012      12        27        362              0.417000       2.611542       0.159495       0.268787   -9999.000000   -9999.000000   -9999.000000       0.185000
57634     57634     guizhou        107.8867       28.5242          126       152     2012      12        28        363              0.000000       3.562256       3.070874       0.269433       0.097000   -9999.000000   -9999.000000   -9999.000000
57634     57634     guizhou        107.8867       28.5242          126       152     2012      12        29        364              0.000000       3.280334       5.151002       0.277543   -9999.000000   -9999.000000   -9999.000000       0.177000
57634     57634     guizhou        107.8867       28.5242          126       152     2012      12        30        365              0.000000       2.720154       1.628726       0.281997   -9999.000000   -9999.000000       0.054900   -9999.000000
57634     57634     guizhou        107.8867       28.5242          126       152     2012      12        31        366              0.426867       3.694336       0.284693       0.267225   -9999.000000   -9999.000000       0.049200   -9999.000000
