# Supplementary material for: Research on Fusing Multisatellite Soil Moisture Data Based on Bayesian Model Averaging
Source: Hindawi journal article supplement (doi:10.1155/2018/9310838), 2018-06-25
Supplement: f1 [file 9310838.f1.zip › 2012_sm00-10cm_daily_ZDB_ZHY_57646_366days_allin.txt]

57646     57646     hunan          109.9497       28.4697          126       160     2012      01        01        001              0.000000   -9999.000000       0.000000   -9999.000000       0.088500   -9999.000000       0.049900   -9999.000000
57646     57646     hunan          109.9497       28.4697          126       160     2012      01        02        002              0.286958       5.831482       3.445004       0.282559       0.098000       0.122800   -9999.000000       0.011000
57646     57646     hunan          109.9497       28.4697          126       160     2012      01        03        003              0.000000       4.475189       1.596761       0.287692   -9999.000000   -9999.000000   -9999.000000   -9999.000000
57646     57646     hunan          109.9497       28.4697          126       160     2012      01        04        004              0.285375       2.302216       1.653517       0.286787   -9999.000000       0.134000       0.045200   -9999.000000
57646     57646     hunan          109.9497       28.4697          126       160     2012      01        05        005              0.286958       2.804810       1.911707       0.281241   -9999.000000       0.277400       0.044000       0.004000
57646     57646     hunan          109.9497       28.4697          126       160     2012      01        06        006              0.289417       1.672241       2.427225       0.274270       0.094000   -9999.000000       0.047000   -9999.000000
57646     57646     hunan          109.9497       28.4697          126       160     2012      01        07        007              0.290000       3.536194       0.057768       0.279554       0.096000       0.204400   -9999.000000       0.127000
57646     57646     hunan          109.9497       28.4697          126       160     2012      01        08        008              0.000000       3.466431       0.000000       0.280914   -9999.000000   -9999.000000   -9999.000000   -9999.000000
57646     57646     hunan          109.9497       28.4697          126       160     2012      01        09        009              0.290000       3.644257       6.413311       0.279930   -9999.000000       0.099200   -9999.000000   -9999.000000
57646     57646     hunan          109.9497       28.4697          126       160     2012      01        10        010              0.289750       3.874176       0.184830       0.279386       0.089000       0.270000       0.038500   -9999.000000
57646     57646     hunan          109.9497       28.4697          126       160     2012      01        11        011              0.289083       3.974091       0.156906       0.278741       0.071000   -9999.000000       0.040300   -9999.000000
57646     57646     hunan          109.9497       28.4697          126       160     2012      01        12        012              0.288083       4.182648       0.427436       0.278204       0.075000       0.184300       0.040400       0.006000
57646     57646     hunan          109.9497       28.4697          126       160     2012      01        13        013              0.287458       3.345581       5.501977       0.278431       0.075000   -9999.000000   -9999.000000   -9999.000000
57646     57646     hunan          109.9497       28.4697          126       160     2012      01        14        014              0.295417       3.273529      11.348991       0.288177   -9999.000000       0.159400   -9999.000000       0.064000
57646     57646     hunan          109.9497       28.4697          126       160     2012      01        15        015              0.321833       3.402649       1.945032       0.293297       0.071000   -9999.000000       0.039800   -9999.000000
57646     57646     hunan          109.9497       28.4697          126       160     2012      01        16        016              0.316083       2.193390       0.095910       0.302054       0.074000   -9999.000000       0.037000       0.108000
57646     57646     hunan          109.9497       28.4697          126       160     2012      01        17        017              0.000000       3.309326       7.833082       0.291878       0.075000   -9999.000000       0.036800       0.168000
57646     57646     hunan          109.9497       28.4697          126       160     2012      01        18        018              0.322333       3.583862       4.512496       0.293699       0.079000   -9999.000000       0.038000   -9999.000000
57646     57646     hunan          109.9497       28.4697          126       160     2012      01        19        019              0.320542       3.018188       0.313791       0.300376   -9999.000000   -9999.000000   -9999.000000       0.162000
57646     57646     hunan          109.9497       28.4697          126       160     2012      01        20        020              0.317792       2.980011       2.149384       0.292464       0.079000       0.197700   -9999.000000   -9999.000000
57646     57646     hunan          109.9497       28.4697          126       160     2012      01        21        021              0.323333       2.731323       1.164086       0.287441   -9999.000000   -9999.000000       0.034700       0.116000
57646     57646     hunan          109.9497       28.4697          126       160     2012      01        22        022              0.323417       1.733856       2.814793       0.279640   -9999.000000   -9999.000000       0.034700       0.003000
57646     57646     hunan          109.9497       28.4697          126       160     2012      01        23        023              0.320042       1.310699       0.909778       0.264085   -9999.000000   -9999.000000       0.034200   -9999.000000
57646     57646     hunan          109.9497       28.4697          126       160     2012      01        24        024              0.318750       1.218323       0.087772       0.250514   -9999.000000   -9999.000000   -9999.000000       0.030000
57646     57646     hunan          109.9497       28.4697          126       160     2012      01        25        025              0.315333       1.590179       0.245003       0.250040   -9999.000000   -9999.000000   -9999.000000   -9999.000000
57646     57646     hunan          109.9497       28.4697          126       160     2012      01        26        026              0.312667       2.824066       0.266680       0.263007       0.099000   -9999.000000   -9999.000000       0.042000
57646     57646     hunan          109.9497       28.4697          126       160     2012      01        27        027              0.311542       2.018829       2.867531       0.271994       0.092000       0.112800       0.033300   -9999.000000
57646     57646     hunan          109.9497       28.4697          126       160     2012      01        28        028              0.310125       2.933685       5.654359       0.279193       0.085000       0.260800       0.031600   -9999.000000
57646     57646     hunan          109.9497       28.4697          126       160     2012      01        29        029              0.308708       4.527832       0.359103       0.280295       0.083000   -9999.000000       0.032700       0.090000
57646     57646     hunan          109.9497       28.4697          126       160     2012      01        30        030              0.307333       5.622314       0.542632       0.279449   -9999.000000       0.053400   -9999.000000   -9999.000000
57646     57646     hunan          109.9497       28.4697          126       160     2012      01        31        031              0.305917       4.361328       0.000000       0.277650       0.081000   -9999.000000   -9999.000000       0.078000
57646     57646     hunan          109.9497       28.4697          126       160     2012      02        01        032              0.304708       7.146240       0.000000       0.276593       0.090000   -9999.000000       0.052200   -9999.000000
57646     57646     hunan          109.9497       28.4697          126       160     2012      02        02        033              0.303208       4.995972       0.120568       0.277465       0.093000       0.126500       0.050600   -9999.000000
57646     57646     hunan          109.9497       28.4697          126       160     2012      02        03        034              0.302500       3.513672       0.306946       0.276296       0.086000   -9999.000000       0.053600       0.159000
57646     57646     hunan          109.9497       28.4697          126       160     2012      02        04        035              0.301875       6.723480       0.070908       0.275377   -9999.000000       0.258700       0.050500   -9999.000000
57646     57646     hunan          109.9497       28.4697          126       160     2012      02        05        036              0.300625       6.414429       2.172237       0.275675       0.099000       0.093000   -9999.000000       0.086000
57646     57646     hunan          109.9497       28.4697          126       160     2012      02        06        037              0.301625       4.946320       0.809611       0.280725       0.090500   -9999.000000   -9999.000000   -9999.000000
57646     57646     hunan          109.9497       28.4697          126       160     2012      02        07        038              0.303917       4.925201       0.000000       0.281347   -9999.000000       0.310300       0.035500       0.032000
57646     57646     hunan          109.9497       28.4697          126       160     2012      02        08        039              0.303000       4.773773       0.000000       0.275892   -9999.000000   -9999.000000       0.037700   -9999.000000
57646     57646     hunan          109.9497       28.4697          126       160     2012      02        09        040              0.302417       2.642059       0.000000       0.270014   -9999.000000   -9999.000000       0.037900   -9999.000000
57646     57646     hunan          109.9497       28.4697          126       160     2012      02        10        041              0.301625       2.232483       2.495837       0.264566   -9999.000000       0.281400   -9999.000000       0.022000
57646     57646     hunan          109.9497       28.4697          126       160     2012      02        11        042              0.300542       4.001434       0.000000       0.264726       0.094000   -9999.000000   -9999.000000   -9999.000000
57646     57646     hunan          109.9497       28.4697          126       160     2012      02        12        043              0.299917       3.831665       1.590786       0.269393       0.094000       0.126800   -9999.000000       0.129000
57646     57646     hunan          109.9497       28.4697          126       160     2012      02        13        044              0.301250       3.578156       1.701345       0.274954       0.096000   -9999.000000   -9999.000000   -9999.000000
57646     57646     hunan          109.9497       28.4697          126       160     2012      02        14        045              0.307708       3.833069       0.330226       0.279833   -9999.000000   -9999.000000       0.067300       0.064000
57646     57646     hunan          109.9497       28.4697          126       160     2012      02        15        046              0.312625       3.837036       0.105701       0.276244   -9999.000000   -9999.000000       0.067600       0.165000
57646     57646     hunan          109.9497       28.4697          126       160     2012      02        16        047              0.312500       3.936157       0.372508       0.274469       0.093500   -9999.000000   -9999.000000   -9999.000000
57646     57646     hunan          109.9497       28.4697          126       160     2012      02        17        048              0.310667       4.903687       0.000000       0.272818       0.088000       0.115400   -9999.000000       0.067000
57646     57646     hunan          109.9497       28.4697          126       160     2012      02        18        049              0.308708       5.573151       0.000000       0.270815       0.091000   -9999.000000       0.062000   -9999.000000
57646     57646     hunan          109.9497       28.4697          126       160     2012      02        19        050              0.307708       3.667511       0.142180       0.267472       0.081000   -9999.000000       0.065500       0.082000
57646     57646     hunan          109.9497       28.4697          126       160     2012      02        20        051              0.306708       7.944550       0.148439       0.266792   -9999.000000       0.353200       0.034400       0.240000
57646     57646     hunan          109.9497       28.4697          126       160     2012      02        21        052              0.310708       6.679047      14.928186       0.268297   -9999.000000   -9999.000000   -9999.000000   -9999.000000
57646     57646     hunan          109.9497       28.4697          126       160     2012      02        22        053              0.324417       6.592712       3.956570       0.287478       0.064500       0.281800   -9999.000000       0.329000
57646     57646     hunan          109.9497       28.4697          126       160     2012      02        23        054              0.327792       8.561096       3.407996       0.296086       0.069000       0.056700   -9999.000000   -9999.000000
57646     57646     hunan          109.9497       28.4697          126       160     2012      02        24        055              0.320833       7.899567       0.537625       0.295385       0.073000   -9999.000000       0.036300       0.169000
57646     57646     hunan          109.9497       28.4697          126       160     2012      02        25        056              0.318708       5.748535       0.126637       0.284362   -9999.000000       0.217000       0.035100   -9999.000000
57646     57646     hunan          109.9497       28.4697          126       160     2012      02        26        057              0.316417       4.243652       1.551034       0.279428   -9999.000000   -9999.000000       0.035900   -9999.000000
57646     57646     hunan          109.9497       28.4697          126       160     2012      02        27        058              0.314667       2.990143       0.125380       0.275866   -9999.000000   -9999.000000   -9999.000000       0.056000
57646     57646     hunan          109.9497       28.4697          126       160     2012      02        28        059              0.313708       3.049713       0.816508       0.274655       0.067500   -9999.000000   -9999.000000   -9999.000000
57646     57646     hunan          109.9497       28.4697          126       160     2012      02        29        060              0.000000   -9999.000000       0.099553   -9999.000000       0.064000   -9999.000000   -9999.000000   -9999.000000
57646     57646     hunan          109.9497       28.4697          126       160     2012      03        01        061              0.313292       4.645935       0.154779       0.276265   -9999.000000       0.270300       0.033900   -9999.000000
57646     57646     hunan          109.9497       28.4697          126       160     2012      03        02        062              0.311917       6.561157       2.210650       0.275550   -9999.000000   -9999.000000       0.036000       0.051000
57646     57646     hunan          109.9497       28.4697          126       160     2012      03        03        063              0.312250       6.129517       6.453866       0.277729       0.093000       0.119100       0.037500       0.093000
57646     57646     hunan          109.9497       28.4697          126       160     2012      03        04        064              0.318417       5.304779       0.262050       0.290725       0.089500       0.126400   -9999.000000   -9999.000000
57646     57646     hunan          109.9497       28.4697          126       160     2012      03        05        065              0.317750       4.945190       0.116703       0.284206       0.084000   -9999.000000   -9999.000000       0.152000
57646     57646     hunan          109.9497       28.4697          126       160     2012      03        06        066              0.322125       6.481934       4.848428       0.278875   -9999.000000       0.144700       0.035400   -9999.000000
57646     57646     hunan          109.9497       28.4697          126       160     2012      03        07        067              0.000000       6.059906       2.191848       0.285790   -9999.000000   -9999.000000       0.035300       0.249000
57646     57646     hunan          109.9497       28.4697          126       160     2012      03        08        068              0.328542       5.637573       3.534289       0.286767   -9999.000000       0.268000       0.035500       0.354000
57646     57646     hunan          109.9497       28.4697          126       160     2012      03        09        069              0.325375       5.226654       0.575422       0.289152       0.084500       0.202200       0.034100   -9999.000000
57646     57646     hunan          109.9497       28.4697          126       160     2012      03        10        070              0.320792       5.655670       0.000000       0.283810       0.082500   -9999.000000   -9999.000000       0.067000
57646     57646     hunan          109.9497       28.4697          126       160     2012      03        11        071              0.317208       8.669891       0.000000       0.277584       0.073000       0.287000   -9999.000000   -9999.000000
57646     57646     hunan          109.9497       28.4697          126       160     2012      03        12        072              0.314292       9.025085       0.000000       0.274930   -9999.000000       0.155400       0.032800       0.155000
57646     57646     hunan          109.9497       28.4697          126       160     2012      03        13        073              0.312167       8.959839       0.338510       0.273295       0.070000       0.356600       0.034200   -9999.000000
57646     57646     hunan          109.9497       28.4697          126       160     2012      03        14        074              0.309875      12.034393       0.333640       0.270945       0.078500       0.242500   -9999.000000       0.160000
57646     57646     hunan          109.9497       28.4697          126       160     2012      03        15        075              0.308875       9.761383       0.386102       0.272221       0.075000   -9999.000000   -9999.000000       0.228000
57646     57646     hunan          109.9497       28.4697          126       160     2012      03        16        076              0.307833      10.466522       0.297891       0.272695       0.074000       0.165800   -9999.000000   -9999.000000
57646     57646     hunan          109.9497       28.4697          126       160     2012      03        17        077              0.307167      11.317871       0.000000       0.272677   -9999.000000       0.077100       0.032100       0.281000
57646     57646     hunan          109.9497       28.4697          126       160     2012      03        18        078              0.305833      14.332520       0.333906       0.270005       0.075000   -9999.000000       0.035000   -9999.000000
57646     57646     hunan          109.9497       28.4697          126       160     2012      03        19        079              0.304125      15.110291       0.071249       0.268755       0.079000       0.274200       0.042200       0.198000
57646     57646     hunan          109.9497       28.4697          126       160     2012      03        20        080              0.301417      12.742279       0.652637       0.268834       0.081500   -9999.000000       0.044700       0.184000
57646     57646     hunan          109.9497       28.4697          126       160     2012      03        21        081              0.300000       9.535645       2.921184       0.269780       0.092000       0.039800   -9999.000000   -9999.000000
57646     57646     hunan          109.9497       28.4697          126       160     2012      03        22        082              0.329458       8.927490      26.970844       0.274234   -9999.000000   -9999.000000   -9999.000000       0.576000
57646     57646     hunan          109.9497       28.4697          126       160     2012      03        23        083              0.328333       8.211731       0.000000       0.320646   -9999.000000   -9999.000000       0.039000   -9999.000000
57646     57646     hunan          109.9497       28.4697          126       160     2012      03        24        084              0.321333      12.300903       0.000000       0.294909       0.075000       0.085900       0.037700       0.255000
57646     57646     hunan          109.9497       28.4697          126       160     2012      03        25        085              0.000000      14.996704       1.092561       0.280481       0.067500   -9999.000000       0.038100   -9999.000000
57646     57646     hunan          109.9497       28.4697          126       160     2012      03        26        086              0.312667      16.572540       0.000000       0.273045       0.067000       0.061700   -9999.000000   -9999.000000
57646     57646     hunan          109.9497       28.4697          126       160     2012      03        27        087              0.308000      17.768890       0.000000       0.268242       0.066000   -9999.000000   -9999.000000       0.520000
57646     57646     hunan          109.9497       28.4697          126       160     2012      03        28        088              0.304583      17.722351      12.609027       0.267562   -9999.000000   -9999.000000   -9999.000000   -9999.000000
57646     57646     hunan          109.9497       28.4697          126       160     2012      03        29        089              0.321792      15.335846      33.772518       0.298364   -9999.000000       0.311300       0.057000       0.648000
57646     57646     hunan          109.9497       28.4697          126       160     2012      03        30        090              0.335000      15.767395       1.136477       0.311138       0.076500   -9999.000000       0.053300   -9999.000000
57646     57646     hunan          109.9497       28.4697          126       160     2012      03        31        091              0.325833      14.987610       0.000000       0.308348       0.070000       0.266100       0.052600       0.400000
57646     57646     hunan          109.9497       28.4697          126       160     2012      04        01        092              0.320143      17.148773       0.000000       0.286591       0.077000       0.149200   -9999.000000       0.575000
57646     57646     hunan          109.9497       28.4697          126       160     2012      04        02        093              0.315267      18.763367       0.000000       0.279110   -9999.000000   -9999.000000   -9999.000000   -9999.000000
57646     57646     hunan          109.9497       28.4697          126       160     2012      04        03        094              0.308762      21.475159       2.375959       0.275760       0.082000       0.381500       0.043600       0.359000
57646     57646     hunan          109.9497       28.4697          126       160     2012      04        04        095              0.300136      17.751038       2.559710       0.277700       0.089500       0.176500       0.051200   -9999.000000
57646     57646     hunan          109.9497       28.4697          126       160     2012      04        05        096              0.296333      14.327545       0.109089       0.288605       0.072000   -9999.000000       0.050200       0.389000
57646     57646     hunan          109.9497       28.4697          126       160     2012      04        06        097              0.290292      16.975128       0.000000       0.280539       0.072000       0.379900       0.048500       0.308000
57646     57646     hunan          109.9497       28.4697          126       160     2012      04        07        098              0.285417      16.472412       0.049123       0.278343   -9999.000000   -9999.000000   -9999.000000   -9999.000000
57646     57646     hunan          109.9497       28.4697          126       160     2012      04        08        099              0.283458      15.325073       1.240775       0.278246   -9999.000000       0.276400   -9999.000000       0.170000
57646     57646     hunan          109.9497       28.4697          126       160     2012      04        09        100              0.283500      15.692596       2.046084       0.279410       0.090500   -9999.000000       0.054800   -9999.000000
57646     57646     hunan          109.9497       28.4697          126       160     2012      04        10        101              0.285250      15.550720       0.048441       0.285646       0.087500   -9999.000000       0.056500       0.571000
57646     57646     hunan          109.9497       28.4697          126       160     2012      04        11        102              0.314792      16.788879      12.235519       0.280767       0.102000       0.255400       0.062000   -9999.000000
57646     57646     hunan          109.9497       28.4697          126       160     2012      04        12        103              0.332583      16.972168      19.521057       0.304882   -9999.000000   -9999.000000   -9999.000000       0.694000
57646     57646     hunan          109.9497       28.4697          126       160     2012      04        13        104              0.328000      16.297028       3.420990       0.316961   -9999.000000       0.205600   -9999.000000       0.642000
57646     57646     hunan          109.9497       28.4697          126       160     2012      04        14        105              0.332875      16.038147       8.028708       0.296758       0.101500       0.209300   -9999.000000   -9999.000000
57646     57646     hunan          109.9497       28.4697          126       160     2012      04        15        106              0.333167      16.529602       1.066889       0.296825       0.097000   -9999.000000       0.055700       0.543000
57646     57646     hunan          109.9497       28.4697          126       160     2012      04        16        107              0.324708      17.099487       1.493403       0.297139       0.084000       0.229300       0.079400   -9999.000000
57646     57646     hunan          109.9497       28.4697          126       160     2012      04        17        108              0.321792      17.301361       0.838677       0.289435       0.097000   -9999.000000       0.085100       0.388000
57646     57646     hunan          109.9497       28.4697          126       160     2012      04        18        109              0.321583      15.547394       1.069826       0.287689   -9999.000000       0.198900   -9999.000000       0.533000
57646     57646     hunan          109.9497       28.4697          126       160     2012      04        19        110              0.318333      19.359192       8.720935       0.283582       0.090000       0.275600   -9999.000000   -9999.000000
57646     57646     hunan          109.9497       28.4697          126       160     2012      04        20        111              0.318458      20.675720       0.167156       0.289138       0.093000   -9999.000000       0.079300       0.475000
57646     57646     hunan          109.9497       28.4697          126       160     2012      04        21        112              0.315917      18.991760       0.000000       0.294248       0.132000       0.175500       0.077200   -9999.000000
57646     57646     hunan          109.9497       28.4697          126       160     2012      04        22        113              0.309875      21.490540       0.245078       0.281036       0.119000   -9999.000000       0.072400       0.434000
57646     57646     hunan          109.9497       28.4697          126       160     2012      04        23        114              0.302833      23.205963       0.952588       0.275293   -9999.000000   -9999.000000       0.100800   -9999.000000
57646     57646     hunan          109.9497       28.4697          126       160     2012      04        24        115              0.295458      22.887482       2.461084       0.279369       0.149000       0.179100   -9999.000000   -9999.000000
57646     57646     hunan          109.9497       28.4697          126       160     2012      04        25        116              0.000000      24.389130       6.364649       0.281175       0.138500   -9999.000000   -9999.000000       0.437000
57646     57646     hunan          109.9497       28.4697          126       160     2012      04        26        117              0.283833      19.709869       0.000000       0.293276       0.131500       0.449700       0.100700   -9999.000000
57646     57646     hunan          109.9497       28.4697          126       160     2012      04        27        118              0.274458      21.404236       0.232682       0.276691       0.110000   -9999.000000       0.096600       0.448000
57646     57646     hunan          109.9497       28.4697          126       160     2012      04        28        119              0.299417      22.975983      25.227442       0.272675   -9999.000000   -9999.000000       0.106000   -9999.000000
57646     57646     hunan          109.9497       28.4697          126       160     2012      04        29        120              0.326417      20.183746      22.642971       0.317829   -9999.000000       0.440100   -9999.000000       0.653000
57646     57646     hunan          109.9497       28.4697          126       160     2012      04        30        121              0.339625      21.513794      12.069287       0.311987       0.157000   -9999.000000   -9999.000000       0.952000
57646     57646     hunan          109.9497       28.4697          126       160     2012      05        01        122              0.340125      21.062195       9.847850       0.315302       0.175000       0.132200   -9999.000000   -9999.000000
57646     57646     hunan          109.9497       28.4697          126       160     2012      05        02        123              0.332000      19.782166      15.035737       0.314308       0.150000       0.182300       0.080800       0.514000
57646     57646     hunan          109.9497       28.4697          126       160     2012      05        03        124              0.338417      20.237305       5.280059       0.307394   -9999.000000   -9999.000000       0.088400   -9999.000000
57646     57646     hunan          109.9497       28.4697          126       160     2012      05        04        125              0.328458      19.785278       0.122669       0.312490   -9999.000000       0.304000       0.086200       0.599000
57646     57646     hunan          109.9497       28.4697          126       160     2012      05        05        126              0.323167      21.379333       0.000000       0.299399       0.143000   -9999.000000   -9999.000000       0.626000
57646     57646     hunan          109.9497       28.4697          126       160     2012      05        06        127              0.317833      23.976654       0.000000       0.293444       0.141500       0.249600   -9999.000000   -9999.000000
57646     57646     hunan          109.9497       28.4697          126       160     2012      05        07        128              0.311333      24.789734       0.602398       0.289292   -9999.000000       0.202000       0.089800       0.568000
57646     57646     hunan          109.9497       28.4697          126       160     2012      05        08        129              0.325542      26.298065      67.984093       0.285748       0.122000   -9999.000000       0.083000   -9999.000000
57646     57646     hunan          109.9497       28.4697          126       160     2012      05        09        130              0.342458      25.576721       4.883077       0.337805   -9999.000000       0.238800       0.099300       1.000000
57646     57646     hunan          109.9497       28.4697          126       160     2012      05        10        131              0.330708      22.839050       0.000000       0.330782       0.146000   -9999.000000       0.096900   -9999.000000
57646     57646     hunan          109.9497       28.4697          126       160     2012      05        11        132              0.332208      24.253448      42.373268       0.314574       0.174000   -9999.000000   -9999.000000       0.851000
57646     57646     hunan          109.9497       28.4697          126       160     2012      05        12        133              0.349375      24.441101      21.665359       0.330692       0.197000       0.242600   -9999.000000       1.000000
57646     57646     hunan          109.9497       28.4697          126       160     2012      05        13        134              0.336375      22.336700      14.693444       0.405182       0.188000   -9999.000000       0.092500   -9999.000000
57646     57646     hunan          109.9497       28.4697          126       160     2012      05        14        135              0.343875      20.704437       4.847766       0.332781   -9999.000000       0.214000       0.122600       0.688000
57646     57646     hunan          109.9497       28.4697          126       160     2012      05        15        136              0.333417      19.263367       0.107509       0.327697       0.170000       0.260500       0.118800   -9999.000000
57646     57646     hunan          109.9497       28.4697          126       160     2012      05        16        137              0.328792      20.412201       0.000000       0.312499       0.151000   -9999.000000   -9999.000000       0.439000
57646     57646     hunan          109.9497       28.4697          126       160     2012      05        17        138              0.324125      22.062988       0.000000       0.302254       0.155500       0.281700   -9999.000000       0.657000
57646     57646     hunan          109.9497       28.4697          126       160     2012      05        18        139              0.325417      23.796234       8.147313       0.296728       0.176000   -9999.000000   -9999.000000   -9999.000000
57646     57646     hunan          109.9497       28.4697          126       160     2012      05        19        140              0.338667      22.089233       0.000000       0.306220   -9999.000000       0.248100       0.115200       0.587000
57646     57646     hunan          109.9497       28.4697          126       160     2012      05        20        141              0.328833      25.044403       0.000000       0.294382   -9999.000000       0.272500       0.114200   -9999.000000
57646     57646     hunan          109.9497       28.4697          126       160     2012      05        21        142              0.328542      25.266144      19.489664       0.284961       0.210000   -9999.000000       0.089000       0.814000
57646     57646     hunan          109.9497       28.4697          126       160     2012      05        22        143              0.353792      23.199951      23.931553       0.303170       0.236000       0.265700   -9999.000000   -9999.000000
57646     57646     hunan          109.9497       28.4697          126       160     2012      05        23        144              0.346958      20.898193      16.515574       0.326535   -9999.000000       0.249600   -9999.000000   -9999.000000
57646     57646     hunan          109.9497       28.4697          126       160     2012      05        24        145              0.357792      20.117096      30.562782       0.316255   -9999.000000       0.199300       0.095700       0.980000
57646     57646     hunan          109.9497       28.4697          126       160     2012      05        25        146              0.000000      19.397156       7.785772       0.337568   -9999.000000       0.164700       0.088700   -9999.000000
57646     57646     hunan          109.9497       28.4697          126       160     2012      05        26        147              0.339167      19.382263       0.064646       0.327170       0.206000   -9999.000000       0.086800       0.484000
57646     57646     hunan          109.9497       28.4697          126       160     2012      05        27        148              0.332875      22.817200       0.118776       0.312096       0.202000       0.224300       0.088800   -9999.000000
57646     57646     hunan          109.9497       28.4697          126       160     2012      05        28        149              0.332125      23.313568       1.526090       0.303637       0.210500       0.158200   -9999.000000       0.527000
57646     57646     hunan          109.9497       28.4697          126       160     2012      05        29        150              0.347417      23.204681      20.262905       0.301218   -9999.000000   -9999.000000   -9999.000000       0.691000
57646     57646     hunan          109.9497       28.4697          126       160     2012      05        30        151              0.341208      22.118774       0.000000       0.321799   -9999.000000       0.170200       0.084200   -9999.000000
57646     57646     hunan          109.9497       28.4697          126       160     2012      05        31        152              0.340833      24.001709       7.220806       0.299766       0.205000   -9999.000000       0.088900   -9999.000000
57646     57646     hunan          109.9497       28.4697          126       160     2012      06        01        153              0.348833      21.742126       8.702821       0.308095       0.194000       0.402600       0.090100   -9999.000000
57646     57646     hunan          109.9497       28.4697          126       160     2012      06        02        154              0.339333      20.748993       2.315348       0.310823       0.176000   -9999.000000   -9999.000000       0.490000
57646     57646     hunan          109.9497       28.4697          126       160     2012      06        03        155              0.361625      22.741058      45.424187       0.299262   -9999.000000   -9999.000000   -9999.000000       0.877000
57646     57646     hunan          109.9497       28.4697          126       160     2012      06        04        156              0.358292      20.725891      16.161741       0.340219   -9999.000000       0.235200   -9999.000000   -9999.000000
57646     57646     hunan          109.9497       28.4697          126       160     2012      06        05        157              0.343958      20.816895       1.013451       0.334103       0.203000   -9999.000000       0.091600       0.804000
57646     57646     hunan          109.9497       28.4697          126       160     2012      06        06        158              0.339500      22.807007       0.472951       0.317280       0.201500       0.161000       0.092300   -9999.000000
57646     57646     hunan          109.9497       28.4697          126       160     2012      06        07        159              0.355333      23.513031      22.263453       0.307797       0.204000       0.326300       0.095800       1.000000
57646     57646     hunan          109.9497       28.4697          126       160     2012      06        08        160              0.345417      23.276123       0.746589       0.326138       0.186000   -9999.000000   -9999.000000   -9999.000000
57646     57646     hunan          109.9497       28.4697          126       160     2012      06        09        161              0.339125      26.054382       0.072006       0.306646   -9999.000000       0.183600   -9999.000000       0.583000
57646     57646     hunan          109.9497       28.4697          126       160     2012      06        10        162              0.335958      27.245850      10.062008       0.300854   -9999.000000       0.202600       0.086600       1.000000
57646     57646     hunan          109.9497       28.4697          126       160     2012      06        11        163              0.000000      25.382996       0.000000       0.311816       0.141000       0.167900       0.069100   -9999.000000
57646     57646     hunan          109.9497       28.4697          126       160     2012      06        12        164              0.334083      26.354858       0.000000       0.297705       0.132000       0.236100       0.068800       0.689000
57646     57646     hunan          109.9497       28.4697          126       160     2012      06        13        165              0.330042      27.149811       0.445199       0.291265       0.119000   -9999.000000       0.063300   -9999.000000
57646     57646     hunan          109.9497       28.4697          126       160     2012      06        14        166              0.326042      27.494812       0.480519       0.286936       0.131000   -9999.000000   -9999.000000       0.588000
57646     57646     hunan          109.9497       28.4697          126       160     2012      06        15        167              0.323125      25.712128       0.000000       0.286074   -9999.000000       0.194300   -9999.000000       0.691000
57646     57646     hunan          109.9497       28.4697          126       160     2012      06        16        168              0.316750      26.670685       0.000000       0.280454       0.114000   -9999.000000       0.065500   -9999.000000
57646     57646     hunan          109.9497       28.4697          126       160     2012      06        17        169              0.307500      26.422760       0.000000       0.277004       0.120500   -9999.000000       0.065100       0.588000
57646     57646     hunan          109.9497       28.4697          126       160     2012      06        18        170              0.297833      26.667419       0.285442       0.274016       0.126000   -9999.000000       0.113800   -9999.000000
57646     57646     hunan          109.9497       28.4697          126       160     2012      06        19        171              0.288375      26.477539       0.000000       0.273844       0.121000       0.420900   -9999.000000       0.482000
57646     57646     hunan          109.9497       28.4697          126       160     2012      06        20        172              0.279208      27.348480       0.000000       0.270987   -9999.000000   -9999.000000   -9999.000000   -9999.000000
57646     57646     hunan          109.9497       28.4697          126       160     2012      06        21        173              0.273208      27.953796       1.796206       0.268459       0.175000   -9999.000000       0.113700       0.712000
57646     57646     hunan          109.9497       28.4697          126       160     2012      06        22        174              0.271958      26.845490       1.644246       0.273206       0.165500       0.151700       0.118200       0.547000
57646     57646     hunan          109.9497       28.4697          126       160     2012      06        23        175              0.268500      28.141113       0.928633       0.272950       0.164000   -9999.000000       0.114000   -9999.000000
57646     57646     hunan          109.9497       28.4697          126       160     2012      06        24        176              0.263250      28.641998       0.054592       0.267159       0.150000       0.069000       0.107700       0.436000
57646     57646     hunan          109.9497       28.4697          126       160     2012      06        25        177              0.290083      29.116150      60.544704       0.262019   -9999.000000   -9999.000000   -9999.000000   -9999.000000
57646     57646     hunan          109.9497       28.4697          126       160     2012      06        26        178              0.350208      27.001343      61.672779       0.325054   -9999.000000   -9999.000000   -9999.000000       1.000000
57646     57646     hunan          109.9497       28.4697          126       160     2012      06        27        179              0.349292      26.211365      45.904999       0.349878       0.212500       0.203200       0.121900       1.000000
57646     57646     hunan          109.9497       28.4697          126       160     2012      06        28        180              0.335000      26.019470       4.446225       0.479674       0.193500   -9999.000000       0.115400   -9999.000000
57646     57646     hunan          109.9497       28.4697          126       160     2012      06        29        181              0.332875      27.071228       0.056296       0.383137       0.170500       0.162700       0.110200       0.957000
57646     57646     hunan          109.9497       28.4697          126       160     2012      06        30        182              0.327333      29.236664       0.547623       0.320913   -9999.000000       0.162100   -9999.000000   -9999.000000
57646     57646     hunan          109.9497       28.4697          126       160     2012      07        01        183              0.322333      30.068085       0.266010       0.306444   -9999.000000   -9999.000000   -9999.000000       0.711000
57646     57646     hunan          109.9497       28.4697          126       160     2012      07        02        184              0.316375      28.732849       0.000000       0.299331       0.160000       0.095500   -9999.000000       0.583000
57646     57646     hunan          109.9497       28.4697          126       160     2012      07        03        185              0.305417      29.082672       3.717096       0.292123       0.150000       0.246900       0.128700   -9999.000000
57646     57646     hunan          109.9497       28.4697          126       160     2012      07        04        186              0.293042      29.293365       0.000000       0.285992       0.151500   -9999.000000       0.128400       0.493000
57646     57646     hunan          109.9497       28.4697          126       160     2012      07        05        187              0.283000      29.492981       1.022424       0.280705       0.145000       0.294000       0.125600   -9999.000000
57646     57646     hunan          109.9497       28.4697          126       160     2012      07        06        188              0.274250      29.569458       0.000000       0.279831   -9999.000000   -9999.000000   -9999.000000       0.594000
57646     57646     hunan          109.9497       28.4697          126       160     2012      07        07        189              0.265917      30.400879       0.058259       0.274792   -9999.000000   -9999.000000   -9999.000000   -9999.000000
57646     57646     hunan          109.9497       28.4697          126       160     2012      07        08        190              0.259333      30.260529       0.000000       0.272206       0.148000   -9999.000000       0.127500       0.557000
57646     57646     hunan          109.9497       28.4697          126       160     2012      07        09        191              0.258667      29.460968       0.000000       0.269844       0.146500   -9999.000000       0.102300       0.560000
57646     57646     hunan          109.9497       28.4697          126       160     2012      07        10        192              0.255125      29.394989       0.749776       0.267753       0.138000       0.250100       0.101100   -9999.000000
57646     57646     hunan          109.9497       28.4697          126       160     2012      07        11        193              0.251667      29.717010       3.196856       0.267436   -9999.000000   -9999.000000       0.097800       0.759000
57646     57646     hunan          109.9497       28.4697          126       160     2012      07        12        194              0.263792      30.087189       8.069275       0.273110       0.208000       0.173800   -9999.000000   -9999.000000
57646     57646     hunan          109.9497       28.4697          126       160     2012      07        13        195              0.295000      29.103119      13.866007       0.288317       0.241000       0.165600   -9999.000000       0.872000
57646     57646     hunan          109.9497       28.4697          126       160     2012      07        14        196              0.311167      27.561005       0.296929       0.305285       0.213000   -9999.000000       0.100400       0.820000
57646     57646     hunan          109.9497       28.4697          126       160     2012      07        15        197              0.309750      27.901276       4.561456       0.284338       0.219500       0.186600       0.103800   -9999.000000
57646     57646     hunan          109.9497       28.4697          126       160     2012      07        16        198              0.315000      28.436188       8.884691       0.282789   -9999.000000   -9999.000000       0.163400       0.856000
57646     57646     hunan          109.9497       28.4697          126       160     2012      07        17        199              0.340750      26.968201      50.565399       0.298808   -9999.000000       0.262800   -9999.000000   -9999.000000
57646     57646     hunan          109.9497       28.4697          126       160     2012      07        18        200              0.348792      26.185394      60.583199       0.339734   -9999.000000       0.251000   -9999.000000       1.000000
57646     57646     hunan          109.9497       28.4697          126       160     2012      07        19        201              0.340500      25.977936       1.985455       0.405876       0.229500   -9999.000000   -9999.000000   -9999.000000
57646     57646     hunan          109.9497       28.4697          126       160     2012      07        20        202              0.330125      27.790222       0.841939       0.353664       0.215000       0.291600       0.160000       0.782000
57646     57646     hunan          109.9497       28.4697          126       160     2012      07        21        203              0.321435      29.302917       0.000000       0.312028       0.262000       0.108700       0.158800       0.707000
57646     57646     hunan          109.9497       28.4697          126       160     2012      07        22        204              0.308083      30.224548       3.360637       0.299485   -9999.000000   -9999.000000       0.131700   -9999.000000
57646     57646     hunan          109.9497       28.4697          126       160     2012      07        23        205              0.293042      30.113251       4.181310       0.298445       0.309000       0.296700   -9999.000000       0.820000
57646     57646     hunan          109.9497       28.4697          126       160     2012      07        24        206              0.289542      29.922028       1.018420       0.296157       0.279500   -9999.000000   -9999.000000   -9999.000000
57646     57646     hunan          109.9497       28.4697          126       160     2012      07        25        207              0.283583      29.443542       0.330713       0.291071       0.290500       0.188400       0.098100       0.621000
57646     57646     hunan          109.9497       28.4697          126       160     2012      07        26        208              0.273958      29.937744       0.370758       0.283376       0.282000   -9999.000000       0.099200       0.716000
57646     57646     hunan          109.9497       28.4697          126       160     2012      07        27        209              0.266250      30.555267       0.297536       0.277980   -9999.000000   -9999.000000       0.100500   -9999.000000
57646     57646     hunan          109.9497       28.4697          126       160     2012      07        28        210              0.261667      30.390869       4.585267       0.275504   -9999.000000       0.180300       0.099200       0.673000
57646     57646     hunan          109.9497       28.4697          126       160     2012      07        29        211              0.257750      29.452362       0.779600       0.285781       0.291500   -9999.000000   -9999.000000   -9999.000000
57646     57646     hunan          109.9497       28.4697          126       160     2012      07        30        212              0.253333      29.933777       0.000000       0.277423       0.272000       0.288400   -9999.000000       0.627000
57646     57646     hunan          109.9497       28.4697          126       160     2012      07        31        213              0.250958      30.775482       2.699157       0.271457       0.243000       0.253200       0.142700       0.651000
57646     57646     hunan          109.9497       28.4697          126       160     2012      08        01        214              0.257667      30.343262       6.171730       0.276251       0.206000   -9999.000000       0.142400   -9999.000000
57646     57646     hunan          109.9497       28.4697          126       160     2012      08        02        215              0.259292      29.678314       0.000000       0.287152   -9999.000000       0.296300       0.139100       0.504000
57646     57646     hunan          109.9497       28.4697          126       160     2012      08        03        216              0.254708      29.968781       0.000000       0.273125       0.231000   -9999.000000   -9999.000000   -9999.000000
57646     57646     hunan          109.9497       28.4697          126       160     2012      08        04        217              0.250375      29.875488       2.322553       0.266227       0.233000       0.105300   -9999.000000       0.756000
57646     57646     hunan          109.9497       28.4697          126       160     2012      08        05        218              0.264750      30.075470      14.144247       0.265822       0.238500       0.248400   -9999.000000   -9999.000000
57646     57646     hunan          109.9497       28.4697          126       160     2012      08        06        219              0.269083      27.857147       1.732118       0.302482       0.226000   -9999.000000       0.153800       0.627000
57646     57646     hunan          109.9497       28.4697          126       160     2012      08        07        220              0.264375      29.425934       0.405840       0.277826   -9999.000000       0.066000       0.147500       0.579000
57646     57646     hunan          109.9497       28.4697          126       160     2012      08        08        221              0.256875      29.660370       0.000000       0.268688   -9999.000000       0.071400       0.148900   -9999.000000
57646     57646     hunan          109.9497       28.4697          126       160     2012      08        09        222              0.250208      29.841125       0.000000       0.262592       0.224000   -9999.000000   -9999.000000       0.624000
57646     57646     hunan          109.9497       28.4697          126       160     2012      08        10        223              0.245625      29.653870       0.000000       0.257788       0.217000       0.352600   -9999.000000   -9999.000000
57646     57646     hunan          109.9497       28.4697          126       160     2012      08        11        224              0.242250      30.016174       0.206913       0.253031       0.237000   -9999.000000       0.151500       0.520000
57646     57646     hunan          109.9497       28.4697          126       160     2012      08        12        225              0.243917      30.857147       5.272208       0.249799   -9999.000000       0.175300       0.153000       0.514000
57646     57646     hunan          109.9497       28.4697          126       160     2012      08        13        226              0.275625      31.168762       0.075542       0.254466   -9999.000000       0.153800       0.147500   -9999.000000
57646     57646     hunan          109.9497       28.4697          126       160     2012      08        14        227              0.264000      31.103088       0.000000       0.260569       0.260000   -9999.000000       0.144800       0.555000
57646     57646     hunan          109.9497       28.4697          126       160     2012      08        15        228              0.255292      30.509796       1.075950       0.250390       0.246500   -9999.000000   -9999.000000   -9999.000000
57646     57646     hunan          109.9497       28.4697          126       160     2012      08        16        229              0.249792      30.487183       0.000000       0.247101       0.243000   -9999.000000   -9999.000000       0.423000
57646     57646     hunan          109.9497       28.4697          126       160     2012      08        17        230              0.246000      30.178986       9.590267       0.242666       0.217000       0.026900       0.147900   -9999.000000
57646     57646     hunan          109.9497       28.4697          126       160     2012      08        18        231              0.242458      30.466888       6.028035       0.239596   -9999.000000       0.331100       0.148900   -9999.000000
57646     57646     hunan          109.9497       28.4697          126       160     2012      08        19        232              0.238292      31.365479       1.469900       0.234066       0.261000   -9999.000000       0.145500       0.628000
57646     57646     hunan          109.9497       28.4697          126       160     2012      08        20        233              0.236000      30.946869      15.760433       0.237874   -9999.000000       0.184000   -9999.000000   -9999.000000
57646     57646     hunan          109.9497       28.4697          126       160     2012      08        21        234              0.303708      31.025757      25.931602       0.260353       0.240000   -9999.000000   -9999.000000       1.000000
57646     57646     hunan          109.9497       28.4697          126       160     2012      08        22        235              0.306125      26.388031       0.000000       0.340501       0.212000       0.159400       0.105500   -9999.000000
57646     57646     hunan          109.9497       28.4697          126       160     2012      08        23        236              0.295333      25.566254       0.000000       0.283389   -9999.000000       0.275000       0.108500       0.469000
57646     57646     hunan          109.9497       28.4697          126       160     2012      08        24        237              0.283000      25.610535       0.000000       0.270939   -9999.000000   -9999.000000       0.109100       0.570000
57646     57646     hunan          109.9497       28.4697          126       160     2012      08        25        238              0.000000      26.689362       0.000000       0.264399       0.224500       0.390700       0.105700   -9999.000000
57646     57646     hunan          109.9497       28.4697          126       160     2012      08        26        239              0.262417      27.800323       0.409092       0.257572       0.213000       0.239100   -9999.000000       0.318000
57646     57646     hunan          109.9497       28.4697          126       160     2012      08        27        240              0.256500      27.282867       0.480003       0.254554       0.206000       0.082000   -9999.000000   -9999.000000
57646     57646     hunan          109.9497       28.4697          126       160     2012      08        28        241              0.251417      27.991119      14.819575       0.250323       0.182000   -9999.000000       0.119300       0.456000
57646     57646     hunan          109.9497       28.4697          126       160     2012      08        29        242              0.247833      28.685089       0.269357       0.246076   -9999.000000   -9999.000000       0.124100       0.485000
57646     57646     hunan          109.9497       28.4697          126       160     2012      08        30        243              0.246208      28.930908       0.428309       0.243591       0.219000       0.290200       0.122500   -9999.000000
57646     57646     hunan          109.9497       28.4697          126       160     2012      08        31        244              0.246708      28.599640      10.096139       0.243772       0.227000       0.274300   -9999.000000       0.335000
57646     57646     hunan          109.9497       28.4697          126       160     2012      09        01        245              0.248625      28.826660       3.448989       0.257021       0.195500   -9999.000000   -9999.000000   -9999.000000
57646     57646     hunan          109.9497       28.4697          126       160     2012      09        02        246              0.309250      28.642670      34.959751       0.278769   -9999.000000       0.368000   -9999.000000       0.979000
57646     57646     hunan          109.9497       28.4697          126       160     2012      09        03        247              0.331958      27.013275       0.777382       0.317948   -9999.000000   -9999.000000       0.130100   -9999.000000
57646     57646     hunan          109.9497       28.4697          126       160     2012      09        04        248              0.323292      25.501892       0.000000       0.296717   -9999.000000       0.180200       0.126100       0.413000
57646     57646     hunan          109.9497       28.4697          126       160     2012      09        05        249              0.313250      25.493988       0.000000       0.278457       0.198500       0.251200       0.126100       0.589000
57646     57646     hunan          109.9497       28.4697          126       160     2012      09        06        250              0.299750      26.053894       0.000000       0.269428       0.193000   -9999.000000   -9999.000000   -9999.000000
57646     57646     hunan          109.9497       28.4697          126       160     2012      09        07        251              0.285917      27.362854       0.000000       0.262297       0.188000       0.197900   -9999.000000       0.599000
57646     57646     hunan          109.9497       28.4697          126       160     2012      09        08        252              0.280917      28.227112      18.141233       0.258336       0.179000   -9999.000000       0.110400   -9999.000000
57646     57646     hunan          109.9497       28.4697          126       160     2012      09        09        253              0.279000      29.021332       4.455232       0.269301   -9999.000000       0.154200       0.141000       0.514000
57646     57646     hunan          109.9497       28.4697          126       160     2012      09        10        254              0.281625      25.190765       0.775247       0.308854       0.228000       0.262200       0.121700       0.727000
57646     57646     hunan          109.9497       28.4697          126       160     2012      09        11        255              0.285375      24.969635       1.756648       0.282147       0.176000   -9999.000000       0.115900   -9999.000000
57646     57646     hunan          109.9497       28.4697          126       160     2012      09        12        256              0.314208      26.526062      56.977364       0.278441   -9999.000000       0.330100   -9999.000000       1.000000
57646     57646     hunan          109.9497       28.4697          126       160     2012      09        13        257              0.335708      22.922882       0.364260       0.332126       0.168000       0.163000   -9999.000000   -9999.000000
57646     57646     hunan          109.9497       28.4697          126       160     2012      09        14        258              0.332333      21.819092       0.000000       0.300557   -9999.000000       0.115100       0.115500       0.343000
57646     57646     hunan          109.9497       28.4697          126       160     2012      09        15        259              0.329667      22.875610       0.000000       0.285743       0.177000       0.410900       0.112000   -9999.000000
57646     57646     hunan          109.9497       28.4697          126       160     2012      09        16        260              0.325167      22.874725       0.467934       0.278652       0.183000   -9999.000000       0.118500   -9999.000000
57646     57646     hunan          109.9497       28.4697          126       160     2012      09        17        261              0.321167      21.368805       0.000000       0.279594       0.172000       0.171200   -9999.000000       0.382000
57646     57646     hunan          109.9497       28.4697          126       160     2012      09        18        262              0.316875      22.455719       0.000000       0.275412       0.168500       0.230700   -9999.000000   -9999.000000
57646     57646     hunan          109.9497       28.4697          126       160     2012      09        19        263              0.310417      23.487549       0.000000       0.272818   -9999.000000   -9999.000000   -9999.000000       0.275000
57646     57646     hunan          109.9497       28.4697          126       160     2012      09        20        264              0.303000      24.371552      12.125999       0.270069   -9999.000000       0.129200       0.105600   -9999.000000
57646     57646     hunan          109.9497       28.4697          126       160     2012      09        21        265              0.314958      23.194244      18.798059       0.292089   -9999.000000   -9999.000000       0.101400       1.000000
57646     57646     hunan          109.9497       28.4697          126       160     2012      09        22        266              0.335333      22.180481       0.548824       0.317253       0.172500   -9999.000000       0.103400       0.785000
57646     57646     hunan          109.9497       28.4697          126       160     2012      09        23        267              0.340042      23.371063       9.608063       0.294063       0.183000       0.424800   -9999.000000   -9999.000000
57646     57646     hunan          109.9497       28.4697          126       160     2012      09        24        268              0.342625      23.111481       1.351254       0.302991       0.170000   -9999.000000   -9999.000000       0.602000
57646     57646     hunan          109.9497       28.4697          126       160     2012      09        25        269              0.344417      23.124542       1.190903       0.292170   -9999.000000       0.130700       0.117800   -9999.000000
57646     57646     hunan          109.9497       28.4697          126       160     2012      09        26        270              0.345625      22.749481       0.169772       0.290142       0.171000   -9999.000000       0.112500       0.522000
57646     57646     hunan          109.9497       28.4697          126       160     2012      09        27        271              0.345000      23.092224       0.000000       0.285157       0.162500       0.131000       0.112400       0.744000
57646     57646     hunan          109.9497       28.4697          126       160     2012      09        28        272              0.339800      23.684204       0.000000       0.281329       0.150000   -9999.000000       0.110200   -9999.000000
57646     57646     hunan          109.9497       28.4697          126       160     2012      09        29        273              0.336250      23.039154       0.000000       0.277750       0.146000   -9999.000000   -9999.000000       0.283000
57646     57646     hunan          109.9497       28.4697          126       160     2012      09        30        274              0.332917      22.011108       0.000000       0.275133   -9999.000000       0.172400   -9999.000000   -9999.000000
57646     57646     hunan          109.9497       28.4697          126       160     2012      10        01        275              0.327667      21.425659       0.000000       0.274298   -9999.000000       0.228100       0.119900       0.454000
57646     57646     hunan          109.9497       28.4697          126       160     2012      10        02        276              0.319500      21.906342       2.560366       0.271411       0.122000       0.147100       0.125500   -9999.000000
57646     57646     hunan          109.9497       28.4697          126       160     2012      10        03        277              0.315833      22.236176       3.467926       0.274121       0.128000       0.259500       0.128500       0.643000
57646     57646     hunan          109.9497       28.4697          126       160     2012      10        04        278              0.321250      19.631073      12.963331       0.286625       0.139000   -9999.000000   -9999.000000       0.605000
57646     57646     hunan          109.9497       28.4697          126       160     2012      10        05        279              0.347250      18.705963       5.619674       0.304957       0.147000       0.220800   -9999.000000   -9999.000000
57646     57646     hunan          109.9497       28.4697          126       160     2012      10        06        280              0.351792      18.571320       0.000000       0.300795   -9999.000000       0.300500   -9999.000000       0.619000
57646     57646     hunan          109.9497       28.4697          126       160     2012      10        07        281              0.350542      20.009399       2.216020       0.286614       0.140000   -9999.000000       0.139200   -9999.000000
57646     57646     hunan          109.9497       28.4697          126       160     2012      10        08        282              0.355750      18.705414       4.040195       0.286639       0.140500       0.330200       0.071800       0.763000
57646     57646     hunan          109.9497       28.4697          126       160     2012      10        09        283              0.356042      18.553558       0.000000       0.291846       0.122000   -9999.000000       0.071200       0.796000
57646     57646     hunan          109.9497       28.4697          126       160     2012      10        10        284              0.352458      20.182404       2.353933       0.284077       0.121000       0.245600   -9999.000000   -9999.000000
57646     57646     hunan          109.9497       28.4697          126       160     2012      10        11        285              0.349250      21.096832       0.046431       0.279196   -9999.000000       0.301100   -9999.000000       0.445000
57646     57646     hunan          109.9497       28.4697          126       160     2012      10        12        286              0.347583      19.336304       7.191276       0.278194       0.133000   -9999.000000       0.076800   -9999.000000
57646     57646     hunan          109.9497       28.4697          126       160     2012      10        13        287              0.358208      18.538910       2.702911       0.286018       0.132500       0.322700       0.072000       0.599000
57646     57646     hunan          109.9497       28.4697          126       160     2012      10        14        288              0.361042      17.843536       5.938712       0.295643       0.136500   -9999.000000       0.075200   -9999.000000
57646     57646     hunan          109.9497       28.4697          126       160     2012      10        15        289              0.361042      18.024872       1.410948       0.297379       0.140000       0.191000       0.148500   -9999.000000
57646     57646     hunan          109.9497       28.4697          126       160     2012      10        16        290              0.363958      18.169312       8.332507       0.288974   -9999.000000       0.228200   -9999.000000       0.754000
57646     57646     hunan          109.9497       28.4697          126       160     2012      10        17        291              0.358333      18.446747       0.000000       0.301530   -9999.000000   -9999.000000   -9999.000000   -9999.000000
57646     57646     hunan          109.9497       28.4697          126       160     2012      10        18        292              0.353083      18.459808       0.000000       0.284010       0.117000       0.340100       0.137000       0.310000
57646     57646     hunan          109.9497       28.4697          126       160     2012      10        19        293              0.350583      18.684753       2.692842       0.279141       0.122000       0.216700       0.139900   -9999.000000
57646     57646     hunan          109.9497       28.4697          126       160     2012      10        20        294              0.360667      19.010864      11.780745       0.278301       0.126500       0.299300       0.144000       0.605000
57646     57646     hunan          109.9497       28.4697          126       160     2012      10        21        295              0.361292      18.566742      14.291556       0.304645       0.193000   -9999.000000   -9999.000000       0.634000
57646     57646     hunan          109.9497       28.4697          126       160     2012      10        22        296              0.363375      21.053497       2.609634       0.302229   -9999.000000   -9999.000000   -9999.000000   -9999.000000
57646     57646     hunan          109.9497       28.4697          126       160     2012      10        23        297              0.358583      17.817383       0.307135       0.300858   -9999.000000       0.197200       0.058800       0.504000
57646     57646     hunan          109.9497       28.4697          126       160     2012      10        24        298              0.360167      17.925842      13.312294       0.287346   -9999.000000   -9999.000000       0.063000   -9999.000000
57646     57646     hunan          109.9497       28.4697          126       160     2012      10        25        299              0.000000      16.259705       4.325007       0.303228       0.212500   -9999.000000       0.062100       0.554000
57646     57646     hunan          109.9497       28.4697          126       160     2012      10        26        300              0.361375      16.091705       0.072512       0.304659       0.196000       0.162100       0.059300       0.615000
57646     57646     hunan          109.9497       28.4697          126       160     2012      10        27        301              0.359417      17.407013       0.000000       0.290473   -9999.000000   -9999.000000   -9999.000000   -9999.000000
57646     57646     hunan          109.9497       28.4697          126       160     2012      10        28        302              0.000000      19.075439       6.449365       0.286042   -9999.000000       0.229100   -9999.000000       0.535000
57646     57646     hunan          109.9497       28.4697          126       160     2012      10        29        303              0.367958      19.925507      10.256270       0.292828       0.217500       0.304100       0.097800   -9999.000000
57646     57646     hunan          109.9497       28.4697          126       160     2012      10        30        304              0.364958      18.345978       0.100434       0.308816       0.186500   -9999.000000       0.099800       0.416000
57646     57646     hunan          109.9497       28.4697          126       160     2012      10        31        305              0.361000      17.556763       0.326525       0.292100       0.177000       0.391400       0.099900   -9999.000000
57646     57646     hunan          109.9497       28.4697          126       160     2012      11        01        306              0.358417      17.221985       0.286067       0.286238       0.119000   -9999.000000   -9999.000000       0.331000
57646     57646     hunan          109.9497       28.4697          126       160     2012      11        02        307              0.000000      17.140259       4.915799       0.284852   -9999.000000       0.147100   -9999.000000       0.536000
57646     57646     hunan          109.9497       28.4697          126       160     2012      11        03        308              0.359000      18.450623       2.155510       0.287310       0.131000       0.252700   -9999.000000   -9999.000000
57646     57646     hunan          109.9497       28.4697          126       160     2012      11        04        309              0.358000      16.186279       6.564791       0.296380       0.122500   -9999.000000       0.094200       0.564000
57646     57646     hunan          109.9497       28.4697          126       160     2012      11        05        310              0.370042      15.965302       3.956965       0.292892       0.130000       0.271900       0.071600   -9999.000000
57646     57646     hunan          109.9497       28.4697          126       160     2012      11        06        311              0.366292      14.813446       6.048339       0.300874       0.133000       0.241000       0.072300       0.366000
57646     57646     hunan          109.9497       28.4697          126       160     2012      11        07        312              0.376917      15.553864      30.470436       0.294948   -9999.000000       0.040600   -9999.000000       0.527000
57646     57646     hunan          109.9497       28.4697          126       160     2012      11        08        313              0.371762      13.302460       1.548201       0.328472       0.156000       0.194600   -9999.000000   -9999.000000
57646     57646     hunan          109.9497       28.4697          126       160     2012      11        09        314              0.372542      13.528229       9.364131       0.307881       0.152000   -9999.000000       0.074400       0.466000
57646     57646     hunan          109.9497       28.4697          126       160     2012      11        10        315              0.370333      12.433868       0.660029       0.309622       0.139000       0.291300       0.072000   -9999.000000
57646     57646     hunan          109.9497       28.4697          126       160     2012      11        11        316              0.364958      13.813385       0.000000       0.302719       0.141000       0.206800       0.072500       0.300000
57646     57646     hunan          109.9497       28.4697          126       160     2012      11        12        317              0.361208      14.475830       1.650592       0.296040   -9999.000000   -9999.000000       0.098600   -9999.000000
57646     57646     hunan          109.9497       28.4697          126       160     2012      11        13        318              0.000000      12.597565       0.000000       0.293785   -9999.000000       0.071000   -9999.000000       0.370000
57646     57646     hunan          109.9497       28.4697          126       160     2012      11        14        319              0.358583      13.968628       6.752396       0.290409   -9999.000000   -9999.000000   -9999.000000       0.453000
57646     57646     hunan          109.9497       28.4697          126       160     2012      11        15        320              0.377083      13.553589      26.645134       0.295589       0.173500       0.428600       0.104900   -9999.000000
57646     57646     hunan          109.9497       28.4697          126       160     2012      11        16        321              0.374167      12.548920       1.330010       0.321243       0.150000       0.295900       0.098800       0.323000
57646     57646     hunan          109.9497       28.4697          126       160     2012      11        17        322              0.000000      11.178040       0.000000       0.310837       0.140000   -9999.000000       0.101000   -9999.000000
57646     57646     hunan          109.9497       28.4697          126       160     2012      11        18        323              0.364083      12.817780       0.000000       0.300270   -9999.000000       0.274000   -9999.000000       0.370000
57646     57646     hunan          109.9497       28.4697          126       160     2012      11        19        324              0.362417      12.228363       0.351807       0.297324       0.154000   -9999.000000   -9999.000000       0.315000
57646     57646     hunan          109.9497       28.4697          126       160     2012      11        20        325              0.360917      13.209839       2.459801       0.294481       0.166500       0.064800   -9999.000000   -9999.000000
57646     57646     hunan          109.9497       28.4697          126       160     2012      11        21        326              0.367458      11.990997       5.829594       0.295704       0.130000       0.263800       0.061200       0.222000
57646     57646     hunan          109.9497       28.4697          126       160     2012      11        22        327              0.372833      11.797668       2.263599       0.298315       0.127000   -9999.000000       0.059400   -9999.000000
57646     57646     hunan          109.9497       28.4697          126       160     2012      11        23        328              0.367958      11.407013       0.556168       0.300672   -9999.000000       0.405200       0.058400       0.360000
57646     57646     hunan          109.9497       28.4697          126       160     2012      11        24        329              0.367167      10.353577       5.620247       0.292481   -9999.000000       0.244200   -9999.000000       0.204000
57646     57646     hunan          109.9497       28.4697          126       160     2012      11        25        330              0.372292       8.738342       0.880613       0.297351       0.131000       0.128800   -9999.000000   -9999.000000
57646     57646     hunan          109.9497       28.4697          126       160     2012      11        26        331              0.369333       9.191284       0.319473       0.296085       0.119500       0.300600   -9999.000000       0.084000
57646     57646     hunan          109.9497       28.4697          126       160     2012      11        27        332              0.365583       9.583466       0.000000       0.291108       0.127500   -9999.000000       0.052300   -9999.000000
57646     57646     hunan          109.9497       28.4697          126       160     2012      11        28        333              0.363833       9.187775       0.000000       0.288557       0.128000       0.178500       0.051300       0.285000
57646     57646     hunan          109.9497       28.4697          126       160     2012      11        29        334              0.361708       9.802032       0.000000       0.287250   -9999.000000       0.212800       0.053400   -9999.000000
57646     57646     hunan          109.9497       28.4697          126       160     2012      11        30        335              0.360583       8.490082       1.560230       0.286633       0.136000   -9999.000000   -9999.000000       0.200000
57646     57646     hunan          109.9497       28.4697          126       160     2012      12        01        336              0.361958       8.211700       1.109870       0.288568       0.113000       0.030000   -9999.000000       0.584000
57646     57646     hunan          109.9497       28.4697          126       160     2012      12        02        337              0.363375       8.546570       0.000000       0.290912       0.111000   -9999.000000       0.051100   -9999.000000
57646     57646     hunan          109.9497       28.4697          126       160     2012      12        03        338              0.362000       9.001495       0.000000       0.286583       0.100000       0.295900       0.066700       0.278000
57646     57646     hunan          109.9497       28.4697          126       160     2012      12        04        339              0.360292       9.737610       0.000000       0.284431   -9999.000000       0.145300       0.068700   -9999.000000
57646     57646     hunan          109.9497       28.4697          126       160     2012      12        05        340              0.358042       8.374023       0.000000       0.283860   -9999.000000   -9999.000000   -9999.000000       0.142000
57646     57646     hunan          109.9497       28.4697          126       160     2012      12        06        341              0.356167       9.246185       0.000000       0.282253       0.103000       0.158800   -9999.000000       0.342000
57646     57646     hunan          109.9497       28.4697          126       160     2012      12        07        342              0.355042       8.584198       0.000000       0.281807       0.106000   -9999.000000       0.065100   -9999.000000
57646     57646     hunan          109.9497       28.4697          126       160     2012      12        08        343              0.354458       8.153748       0.165192       0.281961       0.103500       0.130200       0.064500       0.296000
57646     57646     hunan          109.9497       28.4697          126       160     2012      12        09        344              0.360000      10.156647       8.368123       0.280988   -9999.000000       0.235500       0.067800   -9999.000000
57646     57646     hunan          109.9497       28.4697          126       160     2012      12        10        345              0.372583       7.583466       7.276519       0.298115   -9999.000000   -9999.000000       0.045700       0.303000
57646     57646     hunan          109.9497       28.4697          126       160     2012      12        11        346              0.367375       6.076752       0.142382       0.303538       0.108000       0.315100   -9999.000000   -9999.000000
57646     57646     hunan          109.9497       28.4697          126       160     2012      12        12        347              0.366125       6.289398       4.497012       0.289218       0.127500       0.290800   -9999.000000       0.386000
57646     57646     hunan          109.9497       28.4697          126       160     2012      12        13        348              0.372125       6.188660       1.591147       0.291821       0.130000       0.186600       0.047800       0.447000
57646     57646     hunan          109.9497       28.4697          126       160     2012      12        14        349              0.372042       6.412689       0.927224       0.293563       0.128000   -9999.000000       0.045500   -9999.000000
57646     57646     hunan          109.9497       28.4697          126       160     2012      12        15        350              0.000000       6.605988       0.000000       0.289733   -9999.000000   -9999.000000       0.046600       0.332000
57646     57646     hunan          109.9497       28.4697          126       160     2012      12        16        351              0.366667       6.647430       2.103252       0.285602       0.123000       0.218200       0.044700   -9999.000000
57646     57646     hunan          109.9497       28.4697          126       160     2012      12        17        352              0.377208       6.812653      11.299734       0.286895       0.131000       0.082400   -9999.000000       0.249000
57646     57646     hunan          109.9497       28.4697          126       160     2012      12        18        353              0.369583       5.609650       0.057152       0.307273       0.117000       0.106500   -9999.000000       0.260000
57646     57646     hunan          109.9497       28.4697          126       160     2012      12        19        354              0.366333       5.256622       0.616503       0.290140   -9999.000000       0.079900       0.045100   -9999.000000
57646     57646     hunan          109.9497       28.4697          126       160     2012      12        20        355              0.000000       3.825775       0.715160       0.287684   -9999.000000   -9999.000000       0.042500       0.186000
57646     57646     hunan          109.9497       28.4697          126       160     2012      12        21        356              0.369625       3.761780       0.148662       0.287506   -9999.000000       0.297700       0.040900   -9999.000000
57646     57646     hunan          109.9497       28.4697          126       160     2012      12        22        357              0.366875       4.225616       0.149148       0.285141   -9999.000000       0.096300   -9999.000000       0.162000
57646     57646     hunan          109.9497       28.4697          126       160     2012      12        23        358              0.364042       4.744843       0.000000       0.283596       0.113000   -9999.000000   -9999.000000       0.192000
57646     57646     hunan          109.9497       28.4697          126       160     2012      12        24        359              0.361722       4.923248       0.290280       0.281283       0.106000       0.305300       0.053000   -9999.000000
57646     57646     hunan          109.9497       28.4697          126       160     2012      12        25        360              0.360542       5.635925       0.241468       0.281385       0.125000   -9999.000000       0.055200       0.049000
57646     57646     hunan          109.9497       28.4697          126       160     2012      12        26        361              0.000000       3.777802       1.251058       0.281767   -9999.000000   -9999.000000       0.054400   -9999.000000
57646     57646     hunan          109.9497       28.4697          126       160     2012      12        27        362              0.375333       2.228241       3.048751       0.282851   -9999.000000   -9999.000000       0.054300       0.066000
57646     57646     hunan          109.9497       28.4697          126       160     2012      12        28        363              0.370000       2.120667       5.179731       0.286196       0.131500   -9999.000000   -9999.000000   -9999.000000
57646     57646     hunan          109.9497       28.4697          126       160     2012      12        29        364              0.000000       2.136780       3.714921       0.287514   -9999.000000   -9999.000000   -9999.000000       0.271000
57646     57646     hunan          109.9497       28.4697          126       160     2012      12        30        365              0.000000       2.164032       0.734183       0.294990   -9999.000000   -9999.000000       0.049100       0.154000
57646     57646     hunan          109.9497       28.4697          126       160     2012      12        31        366              0.365667       3.289734       0.471149       0.283094   -9999.000000       0.142400       0.060100   -9999.000000
