# Supplementary material for: Research on Fusing Multisatellite Soil Moisture Data Based on Bayesian Model Averaging
Source: Hindawi journal article supplement (doi:10.1155/2018/9310838), 2018-06-25
Supplement: f1 [file 9310838.f1.zip › 2012_sm00-10cm_daily_ZDB_ZHY_57647_366days_allin.txt]

57647     57647     guizhou        109.1922       28.1714          127       157     2012      01        01        001              0.000000   -9999.000000       0.000000   -9999.000000       0.083500       0.013500       0.054900   -9999.000000
57647     57647     guizhou        109.1922       28.1714          127       157     2012      01        02        002              0.162000       5.096375       5.281359       0.273640       0.089000       0.229700   -9999.000000       0.085000
57647     57647     guizhou        109.1922       28.1714          127       157     2012      01        03        003              0.000000       4.127869       3.288326       0.281609   -9999.000000   -9999.000000   -9999.000000   -9999.000000
57647     57647     guizhou        109.1922       28.1714          127       157     2012      01        04        004              0.187778       1.951721       0.683150       0.283036   -9999.000000   -9999.000000       0.050800       0.009000
57647     57647     guizhou        109.1922       28.1714          127       157     2012      01        05        005              0.000000       2.424957       2.112872       0.271364   -9999.000000   -9999.000000       0.048600       0.023000
57647     57647     guizhou        109.1922       28.1714          127       157     2012      01        06        006              0.186000       1.401062       1.007576       0.260656   -9999.000000   -9999.000000       0.049200   -9999.000000
57647     57647     guizhou        109.1922       28.1714          127       157     2012      01        07        007              0.182000       2.099609       0.747504       0.267879       0.092000       0.294900   -9999.000000       0.005000
57647     57647     guizhou        109.1922       28.1714          127       157     2012      01        08        008              0.000000       2.538330       0.000000       0.271392   -9999.000000   -9999.000000   -9999.000000   -9999.000000
57647     57647     guizhou        109.1922       28.1714          127       157     2012      01        09        009              0.176286       3.477386       0.378939       0.271609   -9999.000000       0.164900   -9999.000000       0.241000
57647     57647     guizhou        109.1922       28.1714          127       157     2012      01        10        010              0.176000       3.708557       0.903382       0.271743       0.094500       0.264300       0.044400   -9999.000000
57647     57647     guizhou        109.1922       28.1714          127       157     2012      01        11        011              0.176000       3.915558       0.429082       0.270628       0.070500   -9999.000000       0.045500       0.030000
57647     57647     guizhou        109.1922       28.1714          127       157     2012      01        12        012              0.176000       3.448029       0.391073       0.270388       0.073000       0.302900       0.044200       0.008000
57647     57647     guizhou        109.1922       28.1714          127       157     2012      01        13        013              0.175500       3.074127       1.732830       0.269573       0.073000   -9999.000000   -9999.000000   -9999.000000
57647     57647     guizhou        109.1922       28.1714          127       157     2012      01        14        014              0.186000       3.094635      11.864069       0.273485   -9999.000000       0.134700   -9999.000000       0.210000
57647     57647     guizhou        109.1922       28.1714          127       157     2012      01        15        015              0.194571       3.392212       1.703147       0.281673   -9999.000000   -9999.000000       0.046000   -9999.000000
57647     57647     guizhou        109.1922       28.1714          127       157     2012      01        16        016              0.187294       2.050812       0.108080       0.294942   -9999.000000   -9999.000000       0.044000       0.239000
57647     57647     guizhou        109.1922       28.1714          127       157     2012      01        17        017              0.000000       2.844574       7.904716       0.282515   -9999.000000       0.133500       0.044600       0.248000
57647     57647     guizhou        109.1922       28.1714          127       157     2012      01        18        018              0.195000       3.226349       2.985934       0.287599       0.076000   -9999.000000       0.045500   -9999.000000
57647     57647     guizhou        109.1922       28.1714          127       157     2012      01        19        019              0.192000       2.622650       3.066256       0.290449   -9999.000000   -9999.000000   -9999.000000       0.423000
57647     57647     guizhou        109.1922       28.1714          127       157     2012      01        20        020              0.000000       2.707306       4.206268       0.284459       0.083000   -9999.000000   -9999.000000   -9999.000000
57647     57647     guizhou        109.1922       28.1714          127       157     2012      01        21        021              0.197000       2.009735       2.700973       0.282843   -9999.000000   -9999.000000       0.042300       0.468000
57647     57647     guizhou        109.1922       28.1714          127       157     2012      01        22        022              0.000000       1.269867       2.123104       0.274446   -9999.000000   -9999.000000       0.039800   -9999.000000
57647     57647     guizhou        109.1922       28.1714          127       157     2012      01        23        023              0.188000       1.190582       0.386485       0.253007   -9999.000000   -9999.000000       0.044200   -9999.000000
57647     57647     guizhou        109.1922       28.1714          127       157     2012      01        24        024              0.186000       1.065063       0.298142       0.232727   -9999.000000   -9999.000000   -9999.000000       0.274000
57647     57647     guizhou        109.1922       28.1714          127       157     2012      01        25        025              0.186947       1.274506       1.291673       0.233186   -9999.000000   -9999.000000   -9999.000000   -9999.000000
57647     57647     guizhou        109.1922       28.1714          127       157     2012      01        26        026              0.184957       2.960083       0.339979       0.257143   -9999.000000   -9999.000000       0.041000       0.119000
57647     57647     guizhou        109.1922       28.1714          127       157     2012      01        27        027              0.181455       2.116211       0.349123       0.266163       0.089000   -9999.000000       0.041800   -9999.000000
57647     57647     guizhou        109.1922       28.1714          127       157     2012      01        28        028              0.177652       2.866150       2.240076       0.272489       0.082000       0.366900       0.040100       0.169000
57647     57647     guizhou        109.1922       28.1714          127       157     2012      01        29        029              0.175833       5.403656       0.226945       0.273858   -9999.000000   -9999.000000       0.039800       0.224000
57647     57647     guizhou        109.1922       28.1714          127       157     2012      01        30        030              0.172000       5.578583       0.000000       0.273266   -9999.000000       0.054800   -9999.000000   -9999.000000
57647     57647     guizhou        109.1922       28.1714          127       157     2012      01        31        031              0.171739       4.523773       0.666189       0.271195   -9999.000000   -9999.000000   -9999.000000       0.005000
57647     57647     guizhou        109.1922       28.1714          127       157     2012      02        01        032              0.170000       7.621582       0.379392       0.270702       0.085000       0.048900       0.053800   -9999.000000
57647     57647     guizhou        109.1922       28.1714          127       157     2012      02        02        033              0.174947       5.404724       1.018548       0.272323       0.086000   -9999.000000       0.048900       0.113000
57647     57647     guizhou        109.1922       28.1714          127       157     2012      02        03        034              0.180727       3.497070       0.829665       0.273812       0.081000   -9999.000000       0.050800       0.237000
57647     57647     guizhou        109.1922       28.1714          127       157     2012      02        04        035              0.178000       5.818726       0.224011       0.273998   -9999.000000       0.196300   -9999.000000   -9999.000000
57647     57647     guizhou        109.1922       28.1714          127       157     2012      02        05        036              0.182000       6.210785       0.767429       0.272006       0.092000   -9999.000000   -9999.000000       0.015000
57647     57647     guizhou        109.1922       28.1714          127       157     2012      02        06        037              0.186000       5.102936       0.368665       0.273926       0.094000   -9999.000000   -9999.000000   -9999.000000
57647     57647     guizhou        109.1922       28.1714          127       157     2012      02        07        038              0.183391       5.079224       0.000000       0.273643   -9999.000000       0.375800       0.038700       0.116000
57647     57647     guizhou        109.1922       28.1714          127       157     2012      02        08        039              0.177545       5.325470       0.000000       0.269462   -9999.000000   -9999.000000       0.041400   -9999.000000
57647     57647     guizhou        109.1922       28.1714          127       157     2012      02        09        040              0.176000       2.440155       0.000000       0.259438   -9999.000000   -9999.000000       0.040100   -9999.000000
57647     57647     guizhou        109.1922       28.1714          127       157     2012      02        10        041              0.174609       1.782837       0.000000       0.252315   -9999.000000       0.139300   -9999.000000       0.101000
57647     57647     guizhou        109.1922       28.1714          127       157     2012      02        11        042              0.172000       3.709991       0.101630       0.258769       0.090000   -9999.000000   -9999.000000   -9999.000000
57647     57647     guizhou        109.1922       28.1714          127       157     2012      02        12        043              0.170091       3.289856       0.446540       0.263700       0.093000       0.236000   -9999.000000       0.123000
57647     57647     guizhou        109.1922       28.1714          127       157     2012      02        13        044              0.175250       3.181366       0.308686       0.266763       0.093000   -9999.000000       0.063400   -9999.000000
57647     57647     guizhou        109.1922       28.1714          127       157     2012      02        14        045              0.178235       3.655640       0.088859       0.268668   -9999.000000       0.019800       0.064100       0.308000
57647     57647     guizhou        109.1922       28.1714          127       157     2012      02        15        046              0.182000       3.836029       0.264478       0.267855   -9999.000000   -9999.000000       0.061700       0.190000
57647     57647     guizhou        109.1922       28.1714          127       157     2012      02        16        047              0.181273       4.124695       0.226403       0.267035       0.087000   -9999.000000   -9999.000000   -9999.000000
57647     57647     guizhou        109.1922       28.1714          127       157     2012      02        17        048              0.178000       5.021240       0.000000       0.265812       0.086500   -9999.000000   -9999.000000       0.153000
57647     57647     guizhou        109.1922       28.1714          127       157     2012      02        18        049              0.000000       4.776062       0.000000       0.264500       0.087000   -9999.000000       0.055800   -9999.000000
57647     57647     guizhou        109.1922       28.1714          127       157     2012      02        19        050              0.175200       3.178497       0.509760       0.257326   -9999.000000       0.070200       0.060800       0.131000
57647     57647     guizhou        109.1922       28.1714          127       157     2012      02        20        051              0.171565       7.309235       0.260715       0.261123   -9999.000000   -9999.000000       0.038100   -9999.000000
57647     57647     guizhou        109.1922       28.1714          127       157     2012      02        21        052              0.170000       6.441315       7.221381       0.263871   -9999.000000   -9999.000000   -9999.000000   -9999.000000
57647     57647     guizhou        109.1922       28.1714          127       157     2012      02        22        053              0.186000       6.250153       1.183724       0.275685       0.066500       0.141200   -9999.000000       0.354000
57647     57647     guizhou        109.1922       28.1714          127       157     2012      02        23        054              0.000000       8.900970       1.539433       0.278530       0.072000       0.100100   -9999.000000   -9999.000000
57647     57647     guizhou        109.1922       28.1714          127       157     2012      02        24        055              0.187273       7.738708       1.218264       0.276978       0.070000       0.127700       0.044600       0.376000
57647     57647     guizhou        109.1922       28.1714          127       157     2012      02        25        056              0.192667       6.230988       1.117880       0.273443   -9999.000000       0.042400       0.040100   -9999.000000
57647     57647     guizhou        109.1922       28.1714          127       157     2012      02        26        057              0.188889       4.069122       0.000000       0.273702   -9999.000000   -9999.000000       0.038900       0.084000
57647     57647     guizhou        109.1922       28.1714          127       157     2012      02        27        058              0.186750       2.695190       0.209292       0.265683   -9999.000000   -9999.000000   -9999.000000       0.105000
57647     57647     guizhou        109.1922       28.1714          127       157     2012      02        28        059              0.185182       2.726776       1.599800       0.263855       0.067000   -9999.000000   -9999.000000   -9999.000000
57647     57647     guizhou        109.1922       28.1714          127       157     2012      02        29        060              0.000000   -9999.000000       0.432491   -9999.000000       0.063000   -9999.000000   -9999.000000   -9999.000000
57647     57647     guizhou        109.1922       28.1714          127       157     2012      03        01        061              0.183739       3.710175       1.287508       0.268134   -9999.000000       0.214000       0.041300   -9999.000000
57647     57647     guizhou        109.1922       28.1714          127       157     2012      03        02        062              0.180364       6.299927       0.992290       0.268890   -9999.000000   -9999.000000       0.041300       0.112000
57647     57647     guizhou        109.1922       28.1714          127       157     2012      03        03        063              0.187167       5.623260       3.694472       0.267876       0.095000       0.189400       0.042900       0.298000
57647     57647     guizhou        109.1922       28.1714          127       157     2012      03        04        064              0.189818       4.890045       0.192409       0.277042       0.099000   -9999.000000   -9999.000000   -9999.000000
57647     57647     guizhou        109.1922       28.1714          127       157     2012      03        05        065              0.186957       4.607513       0.237646       0.272546       0.087500   -9999.000000   -9999.000000       0.160000
57647     57647     guizhou        109.1922       28.1714          127       157     2012      03        06        066              0.186800       6.943634       6.363934       0.268481   -9999.000000       0.091200       0.041900   -9999.000000
57647     57647     guizhou        109.1922       28.1714          127       157     2012      03        07        067              0.000000       5.538849       1.929271       0.278235   -9999.000000   -9999.000000       0.044800       0.414000
57647     57647     guizhou        109.1922       28.1714          127       157     2012      03        08        068              0.193312       4.957397       1.646364       0.280917       0.100000       0.099500       0.042400   -9999.000000
57647     57647     guizhou        109.1922       28.1714          127       157     2012      03        09        069              0.189727       4.905884       0.197357       0.278674       0.090000   -9999.000000   -9999.000000       0.240000
57647     57647     guizhou        109.1922       28.1714          127       157     2012      03        10        070              0.184909       5.490753       0.472501       0.273193       0.084000   -9999.000000   -9999.000000       0.364000
57647     57647     guizhou        109.1922       28.1714          127       157     2012      03        11        071              0.180500       8.638153       0.231599       0.268729       0.081000       0.442600   -9999.000000   -9999.000000
57647     57647     guizhou        109.1922       28.1714          127       157     2012      03        12        072              0.176750       8.911469       0.680247       0.266079   -9999.000000   -9999.000000       0.042000       0.218000
57647     57647     guizhou        109.1922       28.1714          127       157     2012      03        13        073              0.174333       9.944489       0.094435       0.263366       0.077000       0.161300       0.040400   -9999.000000
57647     57647     guizhou        109.1922       28.1714          127       157     2012      03        14        074              0.171391      12.018555       0.080567       0.260267       0.083500       0.109000   -9999.000000       0.208000
57647     57647     guizhou        109.1922       28.1714          127       157     2012      03        15        075              0.170000      10.284821       0.531755       0.261152       0.082000   -9999.000000   -9999.000000       0.162000
57647     57647     guizhou        109.1922       28.1714          127       157     2012      03        16        076              0.170583      10.961639       0.345892       0.262360       0.078000       0.178300   -9999.000000   -9999.000000
57647     57647     guizhou        109.1922       28.1714          127       157     2012      03        17        077              0.173167      12.302551       0.219684       0.262940   -9999.000000       0.087400       0.039700       0.289000
57647     57647     guizhou        109.1922       28.1714          127       157     2012      03        18        078              0.172000      15.501648       0.257303       0.259179       0.080000   -9999.000000       0.042500   -9999.000000
57647     57647     guizhou        109.1922       28.1714          127       157     2012      03        19        079              0.171478      15.598816       0.136716       0.258518       0.083500       0.209300       0.048600       0.267000
57647     57647     guizhou        109.1922       28.1714          127       157     2012      03        20        080              0.169429      13.636444       1.273744       0.258993       0.089000   -9999.000000       0.049400   -9999.000000
57647     57647     guizhou        109.1922       28.1714          127       157     2012      03        21        081              0.177733      10.253021       1.614038       0.260926       0.088000       0.145900   -9999.000000   -9999.000000
57647     57647     guizhou        109.1922       28.1714          127       157     2012      03        22        082              0.198000       8.788300      16.731003       0.265167   -9999.000000   -9999.000000   -9999.000000       0.609000
57647     57647     guizhou        109.1922       28.1714          127       157     2012      03        23        083              0.194095       8.251282       0.201707       0.300544   -9999.000000   -9999.000000       0.046100   -9999.000000
57647     57647     guizhou        109.1922       28.1714          127       157     2012      03        24        084              0.188417      11.787109       0.000000       0.282321       0.072500       0.117200       0.046000       0.295000
57647     57647     guizhou        109.1922       28.1714          127       157     2012      03        25        085              0.000000      15.978851       0.000000       0.268014       0.071500   -9999.000000       0.044300   -9999.000000
57647     57647     guizhou        109.1922       28.1714          127       157     2012      03        26        086              0.181833      17.532318       0.000000       0.260665       0.070000       0.103000   -9999.000000   -9999.000000
57647     57647     guizhou        109.1922       28.1714          127       157     2012      03        27        087              0.179333      17.691254       0.318095       0.256636   -9999.000000       0.347900   -9999.000000       0.449000
57647     57647     guizhou        109.1922       28.1714          127       157     2012      03        28        088              0.198786      18.881927      20.843374       0.254765   -9999.000000   -9999.000000   -9999.000000   -9999.000000
57647     57647     guizhou        109.1922       28.1714          127       157     2012      03        29        089              0.205417      14.419434      19.494738       0.304329   -9999.000000       0.238700       0.077300       0.530000
57647     57647     guizhou        109.1922       28.1714          127       157     2012      03        30        090              0.204579      15.043457       1.726205       0.301411       0.081500       0.114300       0.068500   -9999.000000
57647     57647     guizhou        109.1922       28.1714          127       157     2012      03        31        091              0.194292      14.084503       0.000000       0.297554       0.072000       0.193300       0.067800       0.327000
57647     57647     guizhou        109.1922       28.1714          127       157     2012      04        01        092              0.188087      17.481995       0.000000       0.277139       0.076000       0.305800   -9999.000000       0.523000
57647     57647     guizhou        109.1922       28.1714          127       157     2012      04        02        093              0.186333      19.526459       0.000000       0.268359   -9999.000000   -9999.000000   -9999.000000   -9999.000000
57647     57647     guizhou        109.1922       28.1714          127       157     2012      04        03        094              0.172625      22.520782       2.510136       0.263564       0.082000       0.237200       0.060000       0.132000
57647     57647     guizhou        109.1922       28.1714          127       157     2012      04        04        095              0.159750      18.087585       0.471091       0.264792       0.085500   -9999.000000       0.058500   -9999.000000
57647     57647     guizhou        109.1922       28.1714          127       157     2012      04        05        096              0.154833      14.577972       0.000000       0.271778       0.078500   -9999.000000       0.059500       0.322000
57647     57647     guizhou        109.1922       28.1714          127       157     2012      04        06        097              0.150750      16.843628       0.000000       0.267071       0.080000       0.289900       0.054900   -9999.000000
57647     57647     guizhou        109.1922       28.1714          127       157     2012      04        07        098              0.142083      17.279785       0.184806       0.264066   -9999.000000   -9999.000000   -9999.000000       0.212000
57647     57647     guizhou        109.1922       28.1714          127       157     2012      04        08        099              0.136125      15.647308       0.907231       0.264650       0.082000       0.473700   -9999.000000       0.301000
57647     57647     guizhou        109.1922       28.1714          127       157     2012      04        09        100              0.134500      16.886047       2.659788       0.264272       0.095000   -9999.000000       0.061200   -9999.000000
57647     57647     guizhou        109.1922       28.1714          127       157     2012      04        10        101              0.169333      15.407318       6.218965       0.272694       0.083000   -9999.000000       0.037800       0.403000
57647     57647     guizhou        109.1922       28.1714          127       157     2012      04        11        102              0.206917      17.014740      21.047537       0.276399       0.099500       0.146300       0.062000   -9999.000000
57647     57647     guizhou        109.1922       28.1714          127       157     2012      04        12        103              0.203000      16.807312       7.129000       0.311354   -9999.000000   -9999.000000   -9999.000000       0.858000
57647     57647     guizhou        109.1922       28.1714          127       157     2012      04        13        104              0.195417      16.423553       3.111234       0.297343   -9999.000000       0.177700   -9999.000000       0.615000
57647     57647     guizhou        109.1922       28.1714          127       157     2012      04        14        105              0.197958      15.771454       8.133041       0.286552       0.097500       0.421100   -9999.000000   -9999.000000
57647     57647     guizhou        109.1922       28.1714          127       157     2012      04        15        106              0.200000      16.356812       0.574041       0.289665       0.086000   -9999.000000       0.057100       0.471000
57647     57647     guizhou        109.1922       28.1714          127       157     2012      04        16        107              0.192917      17.912323       0.000000       0.287798       0.080500       0.369800       0.080100   -9999.000000
57647     57647     guizhou        109.1922       28.1714          127       157     2012      04        17        108              0.187833      18.736084       0.717614       0.276732   -9999.000000       0.053700       0.079700       0.339000
57647     57647     guizhou        109.1922       28.1714          127       157     2012      04        18        109              0.188417      16.505066       0.000000       0.274615   -9999.000000       0.314700   -9999.000000   -9999.000000
57647     57647     guizhou        109.1922       28.1714          127       157     2012      04        19        110              0.185167      20.239624       7.976456       0.270203       0.080000       0.265600   -9999.000000   -9999.000000
57647     57647     guizhou        109.1922       28.1714          127       157     2012      04        20        111              0.188250      21.594299       0.000000       0.275998       0.083500   -9999.000000       0.073400       0.435000
57647     57647     guizhou        109.1922       28.1714          127       157     2012      04        21        112              0.184500      20.268951       0.000000       0.282449       0.119000       0.180200       0.073300   -9999.000000
57647     57647     guizhou        109.1922       28.1714          127       157     2012      04        22        113              0.179833      22.550842       0.091748       0.268666       0.109000       0.270100   -9999.000000       0.375000
57647     57647     guizhou        109.1922       28.1714          127       157     2012      04        23        114              0.176417      24.207642       0.349661       0.262222   -9999.000000   -9999.000000       0.102900   -9999.000000
57647     57647     guizhou        109.1922       28.1714          127       157     2012      04        24        115              0.171333      24.022095       2.046045       0.264511       0.137000       0.284100   -9999.000000       0.386000
57647     57647     guizhou        109.1922       28.1714          127       157     2012      04        25        116              0.000000      25.140533       3.406982       0.263481       0.129500   -9999.000000   -9999.000000       0.758000
57647     57647     guizhou        109.1922       28.1714          127       157     2012      04        26        117              0.172417      18.712555       0.000000       0.276340       0.120000       0.199000       0.106900   -9999.000000
57647     57647     guizhou        109.1922       28.1714          127       157     2012      04        27        118              0.172333      21.757172       4.591358       0.261677       0.105000   -9999.000000       0.100100       0.296000
57647     57647     guizhou        109.1922       28.1714          127       157     2012      04        28        119              0.202083      24.041046      23.395460       0.261170   -9999.000000   -9999.000000       0.114300   -9999.000000
57647     57647     guizhou        109.1922       28.1714          127       157     2012      04        29        120              0.201000      20.685181      14.055079       0.311602   -9999.000000       0.209400   -9999.000000       0.734000
57647     57647     guizhou        109.1922       28.1714          127       157     2012      04        30        121              0.206750      21.168335       5.508886       0.299726       0.151000   -9999.000000   -9999.000000       0.828000
57647     57647     guizhou        109.1922       28.1714          127       157     2012      05        01        122              0.204636      21.063538       7.301106       0.299862       0.168000       0.261600       0.088700   -9999.000000
57647     57647     guizhou        109.1922       28.1714          127       157     2012      05        02        123              0.201917      19.490570      14.435777       0.299945       0.142000       0.292900       0.091700       0.515000
57647     57647     guizhou        109.1922       28.1714          127       157     2012      05        03        124              0.205917      19.805878       5.720001       0.297034   -9999.000000   -9999.000000       0.091300   -9999.000000
57647     57647     guizhou        109.1922       28.1714          127       157     2012      05        04        125              0.196167      19.204468       0.392198       0.302641   -9999.000000       0.267300       0.091400       0.693000
57647     57647     guizhou        109.1922       28.1714          127       157     2012      05        05        126              0.192609      20.694885       0.000000       0.285295       0.135500   -9999.000000   -9999.000000   -9999.000000
57647     57647     guizhou        109.1922       28.1714          127       157     2012      05        06        127              0.187583      24.085419       0.000000       0.277696       0.132000       0.160300   -9999.000000       0.503000
57647     57647     guizhou        109.1922       28.1714          127       157     2012      05        07        128              0.186417      24.616394       0.590189       0.275873   -9999.000000   -9999.000000       0.109800       0.614000
57647     57647     guizhou        109.1922       28.1714          127       157     2012      05        08        129              0.185348      27.031036      24.087000       0.272614       0.120000   -9999.000000       0.106400   -9999.000000
57647     57647     guizhou        109.1922       28.1714          127       157     2012      05        09        130              0.208417      26.316803      12.903950       0.304249   -9999.000000       0.384900       0.129000       0.924000
57647     57647     guizhou        109.1922       28.1714          127       157     2012      05        10        131              0.198167      22.582611       0.655582       0.310388       0.138000   -9999.000000       0.116000   -9999.000000
57647     57647     guizhou        109.1922       28.1714          127       157     2012      05        11        132              0.198292      23.820007      15.481088       0.287867       0.155000       0.091900   -9999.000000       0.538000
57647     57647     guizhou        109.1922       28.1714          127       157     2012      05        12        133              0.218217      24.023804      31.784210       0.297479       0.176500       0.402500   -9999.000000       0.888000
57647     57647     guizhou        109.1922       28.1714          127       157     2012      05        13        134              0.207125      22.178284      16.411335       0.326057       0.154000   -9999.000000       0.126500   -9999.000000
57647     57647     guizhou        109.1922       28.1714          127       157     2012      05        14        135              0.207500      20.152191       3.105997       0.311729   -9999.000000       0.502000       0.139200       0.425000
57647     57647     guizhou        109.1922       28.1714          127       157     2012      05        15        136              0.196875      19.470520       0.302999       0.311335       0.138000       0.325900       0.130600   -9999.000000
57647     57647     guizhou        109.1922       28.1714          127       157     2012      05        16        137              0.190417      20.377380       0.311787       0.299548       0.133000   -9999.000000   -9999.000000       0.372000
57647     57647     guizhou        109.1922       28.1714          127       157     2012      05        17        138              0.186750      21.264984       0.000000       0.294261       0.139500       0.410800   -9999.000000   -9999.000000
57647     57647     guizhou        109.1922       28.1714          127       157     2012      05        18        139              0.194375      23.044739       5.982090       0.289453       0.136000   -9999.000000       0.134500   -9999.000000
57647     57647     guizhou        109.1922       28.1714          127       157     2012      05        19        140              0.194417      21.306091       3.254414       0.297859   -9999.000000       0.241600       0.132400       0.464000
57647     57647     guizhou        109.1922       28.1714          127       157     2012      05        20        141              0.188750      25.162445       1.695802       0.283360   -9999.000000       0.313600       0.129100   -9999.000000
57647     57647     guizhou        109.1922       28.1714          127       157     2012      05        21        142              0.467875      25.121002       9.011546       0.276172       0.198000   -9999.000000       0.120700       0.624000
57647     57647     guizhou        109.1922       28.1714          127       157     2012      05        22        143              0.665556      22.159088      21.183420       0.289485       0.228000       0.215100   -9999.000000   -9999.000000
57647     57647     guizhou        109.1922       28.1714          127       157     2012      05        23        144              0.662045      20.203125      11.760026       0.315888   -9999.000000   -9999.000000   -9999.000000       0.869000
57647     57647     guizhou        109.1922       28.1714          127       157     2012      05        24        145              0.666826      19.503571      20.704271       0.304270   -9999.000000       0.136700       0.130200       1.000000
57647     57647     guizhou        109.1922       28.1714          127       157     2012      05        25        146              0.000000      18.937622       4.869084       0.320973   -9999.000000       0.203900       0.118900   -9999.000000
57647     57647     guizhou        109.1922       28.1714          127       157     2012      05        26        147              0.650875      19.011261       0.000000       0.306452       0.181000   -9999.000000       0.118600       0.320000
57647     57647     guizhou        109.1922       28.1714          127       157     2012      05        27        148              0.643500      23.034363       0.000000       0.295699       0.181500       0.311500   -9999.000000   -9999.000000
57647     57647     guizhou        109.1922       28.1714          127       157     2012      05        28        149              0.640167      22.960846       0.441780       0.292684       0.191000       0.219100   -9999.000000       0.639000
57647     57647     guizhou        109.1922       28.1714          127       157     2012      05        29        150              0.660292      23.388275      21.215254       0.288967   -9999.000000       0.175600   -9999.000000       0.710000
57647     57647     guizhou        109.1922       28.1714          127       157     2012      05        30        151              0.649208      21.743866       0.000000       0.315042   -9999.000000       0.556900       0.114300   -9999.000000
57647     57647     guizhou        109.1922       28.1714          127       157     2012      05        31        152              0.644042      24.402649       5.172193       0.290291       0.184000   -9999.000000       0.127400   -9999.000000
57647     57647     guizhou        109.1922       28.1714          127       157     2012      06        01        153              0.658792      20.898071       6.190675       0.296431       0.172500       0.323700       0.118500   -9999.000000
57647     57647     guizhou        109.1922       28.1714          127       157     2012      06        02        154              0.648333      20.393829       7.393859       0.300356       0.152000       0.272200   -9999.000000       0.381000
57647     57647     guizhou        109.1922       28.1714          127       157     2012      06        03        155              0.667167      23.191437      26.285536       0.292243   -9999.000000   -9999.000000   -9999.000000   -9999.000000
57647     57647     guizhou        109.1922       28.1714          127       157     2012      06        04        156              0.660958      20.209503       6.439726       0.323475   -9999.000000       0.342700       0.076700       0.736000
57647     57647     guizhou        109.1922       28.1714          127       157     2012      06        05        157              0.650042      20.576172       0.582955       0.308638       0.180000   -9999.000000       0.077600       0.680000
57647     57647     guizhou        109.1922       28.1714          127       157     2012      06        06        158              0.648000      22.115723       0.174543       0.297355       0.180000       0.410400       0.080700   -9999.000000
57647     57647     guizhou        109.1922       28.1714          127       157     2012      06        07        159              0.662625      22.865540      15.053631       0.294242       0.169000       0.482100       0.079800       0.796000
57647     57647     guizhou        109.1922       28.1714          127       157     2012      06        08        160              0.642292      23.024017       1.083805       0.312735       0.155000   -9999.000000   -9999.000000   -9999.000000
57647     57647     guizhou        109.1922       28.1714          127       157     2012      06        09        161              0.648833      25.722565       0.364106       0.293286   -9999.000000       0.227800   -9999.000000       0.496000
57647     57647     guizhou        109.1922       28.1714          127       157     2012      06        10        162              0.592375      26.535553      16.337851       0.289309   -9999.000000   -9999.000000       0.078400       1.000000
57647     57647     guizhou        109.1922       28.1714          127       157     2012      06        11        163              0.000000      24.804749       0.372820       0.311307       0.132000       0.238900       0.089400   -9999.000000
57647     57647     guizhou        109.1922       28.1714          127       157     2012      06        12        164              0.467000      25.300476       0.000000       0.290862       0.125000   -9999.000000       0.091200       0.501000
57647     57647     guizhou        109.1922       28.1714          127       157     2012      06        13        165              0.462708      25.490997       0.528963       0.286242       0.124500   -9999.000000   -9999.000000   -9999.000000
57647     57647     guizhou        109.1922       28.1714          127       157     2012      06        14        166              0.463167      26.394623       0.408253       0.281967   -9999.000000       0.287200   -9999.000000       0.392000
57647     57647     guizhou        109.1922       28.1714          127       157     2012      06        15        167              0.456292      24.072540       0.000000       0.281297   -9999.000000       0.305900   -9999.000000   -9999.000000
57647     57647     guizhou        109.1922       28.1714          127       157     2012      06        16        168              0.445750      26.318665       0.000000       0.275952       0.114000       0.179600       0.084900   -9999.000000
57647     57647     guizhou        109.1922       28.1714          127       157     2012      06        17        169              0.435208      26.374542       0.000000       0.271551       0.115000       0.251800       0.086900       0.388000
57647     57647     guizhou        109.1922       28.1714          127       157     2012      06        18        170              0.424000      26.807709       0.000000       0.268440       0.118000   -9999.000000       0.126000   -9999.000000
57647     57647     guizhou        109.1922       28.1714          127       157     2012      06        19        171              0.420000      26.716370       0.000000       0.267948       0.114000       0.243200   -9999.000000       0.367000
57647     57647     guizhou        109.1922       28.1714          127       157     2012      06        20        172              0.418000      28.065552       2.959109       0.264832   -9999.000000       0.166300   -9999.000000   -9999.000000
57647     57647     guizhou        109.1922       28.1714          127       157     2012      06        21        173              0.415542      28.082092       1.622600       0.262307       0.145000   -9999.000000       0.125400       0.792000
57647     57647     guizhou        109.1922       28.1714          127       157     2012      06        22        174              0.421125      25.768341       3.889634       0.269188       0.150000       0.407200       0.128800       0.557000
57647     57647     guizhou        109.1922       28.1714          127       157     2012      06        23        175              0.427833      26.729858       0.000000       0.274387       0.139000   -9999.000000       0.127900   -9999.000000
57647     57647     guizhou        109.1922       28.1714          127       157     2012      06        24        176              0.418750      28.308167       0.219355       0.266017       0.136000       0.254400       0.119800       0.192000
57647     57647     guizhou        109.1922       28.1714          127       157     2012      06        25        177              0.448208      28.733856      73.108734       0.259301   -9999.000000       0.430700   -9999.000000   -9999.000000
57647     57647     guizhou        109.1922       28.1714          127       157     2012      06        26        178              0.468500      26.077271      54.907970       0.321314       0.172000   -9999.000000   -9999.000000       1.000000
57647     57647     guizhou        109.1922       28.1714          127       157     2012      06        27        179              0.459522      25.370270       3.027851       0.369981       0.181500       0.493700       0.092700       1.000000
57647     57647     guizhou        109.1922       28.1714          127       157     2012      06        28        180              0.459750      25.982330       4.993983       0.344719       0.167000   -9999.000000       0.088000   -9999.000000
57647     57647     guizhou        109.1922       28.1714          127       157     2012      06        29        181              0.453125      27.102570       0.261297       0.315394       0.154000       0.224400       0.087200       0.778000
57647     57647     guizhou        109.1922       28.1714          127       157     2012      06        30        182              0.445417      28.881500       4.466751       0.300605   -9999.000000   -9999.000000   -9999.000000   -9999.000000
57647     57647     guizhou        109.1922       28.1714          127       157     2012      07        01        183              0.449125      29.816681       0.233810       0.295998   -9999.000000   -9999.000000   -9999.000000       0.469000
57647     57647     guizhou        109.1922       28.1714          127       157     2012      07        02        184              0.432125      29.014526       0.000000       0.290937       0.156500       0.158300   -9999.000000   -9999.000000
57647     57647     guizhou        109.1922       28.1714          127       157     2012      07        03        185              0.416875      28.913208       0.000000       0.282302       0.151500       0.063300       0.159300       0.446000
57647     57647     guizhou        109.1922       28.1714          127       157     2012      07        04        186              0.411583      29.086548       5.032339       0.276481       0.150000       0.066800       0.155300       0.586000
57647     57647     guizhou        109.1922       28.1714          127       157     2012      07        05        187              0.407500      29.307373       0.414418       0.271435   -9999.000000       0.302000       0.156900   -9999.000000
57647     57647     guizhou        109.1922       28.1714          127       157     2012      07        06        188              0.401125      29.110229       0.000000       0.271417   -9999.000000   -9999.000000   -9999.000000       0.464000
57647     57647     guizhou        109.1922       28.1714          127       157     2012      07        07        189              0.392958      30.156677       0.000000       0.266857   -9999.000000       0.143400   -9999.000000   -9999.000000
57647     57647     guizhou        109.1922       28.1714          127       157     2012      07        08        190              0.384292      29.770813       0.000000       0.264241       0.145500       0.334500       0.153200       0.409000
57647     57647     guizhou        109.1922       28.1714          127       157     2012      07        09        191              0.376417      29.293732       0.000000       0.261937       0.147500   -9999.000000       0.072900       0.352000
57647     57647     guizhou        109.1922       28.1714          127       157     2012      07        10        192              0.369043      29.542511       0.000000       0.260298       0.138000       0.282200       0.072800   -9999.000000
57647     57647     guizhou        109.1922       28.1714          127       157     2012      07        11        193              0.361750      30.373627       3.488609       0.257971   -9999.000000   -9999.000000       0.069500       0.793000
57647     57647     guizhou        109.1922       28.1714          127       157     2012      07        12        194              0.360958      30.129700      27.377390       0.264606   -9999.000000       0.233700   -9999.000000   -9999.000000
57647     57647     guizhou        109.1922       28.1714          127       157     2012      07        13        195              0.444348      28.406281      20.226608       0.295343       0.231000       0.401200   -9999.000000       0.743000
57647     57647     guizhou        109.1922       28.1714          127       157     2012      07        14        196              0.436125      27.112579       0.392878       0.315008       0.202000   -9999.000000       0.072800   -9999.000000
57647     57647     guizhou        109.1922       28.1714          127       157     2012      07        15        197              0.429783      28.019897       6.022151       0.285433       0.207500       0.367000       0.068000       0.592000
57647     57647     guizhou        109.1922       28.1714          127       157     2012      07        16        198              0.449292      27.594574      23.790157       0.281487   -9999.000000   -9999.000000       0.200700       1.000000
57647     57647     guizhou        109.1922       28.1714          127       157     2012      07        17        199              0.456333      25.991669      73.885323       0.315369   -9999.000000       0.276100   -9999.000000   -9999.000000
57647     57647     guizhou        109.1922       28.1714          127       157     2012      07        18        200              0.461292      25.477264      57.730412       0.356851   -9999.000000   -9999.000000   -9999.000000       0.919000
57647     57647     guizhou        109.1922       28.1714          127       157     2012      07        19        201              0.452917      25.471771      23.965717       0.503308       0.208500   -9999.000000       0.193500   -9999.000000
57647     57647     guizhou        109.1922       28.1714          127       157     2012      07        20        202              0.439083      26.464081       0.144371       0.478247       0.191000       0.433600       0.189300       0.713000
57647     57647     guizhou        109.1922       28.1714          127       157     2012      07        21        203              0.426792      29.195404       0.000000       0.323561       0.255000       0.081400       0.187900       0.720000
57647     57647     guizhou        109.1922       28.1714          127       157     2012      07        22        204              0.442292      29.804688       8.509144       0.304103   -9999.000000       0.266800       0.167600   -9999.000000
57647     57647     guizhou        109.1922       28.1714          127       157     2012      07        23        205              0.451667      29.732819      13.458321       0.303580       0.275000       0.245900   -9999.000000       0.568000
57647     57647     guizhou        109.1922       28.1714          127       157     2012      07        24        206              0.445750      29.149475       2.773977       0.307763       0.282000   -9999.000000   -9999.000000   -9999.000000
57647     57647     guizhou        109.1922       28.1714          127       157     2012      07        25        207              0.440333      28.489990       1.316358       0.300684       0.291500       0.316400       0.102200       0.601000
57647     57647     guizhou        109.1922       28.1714          127       157     2012      07        26        208              0.432708      28.501801       4.451760       0.293627       0.247000       0.229500       0.102900       0.683000
57647     57647     guizhou        109.1922       28.1714          127       157     2012      07        27        209              0.435208      29.128876       2.638890       0.292905   -9999.000000   -9999.000000       0.096400   -9999.000000
57647     57647     guizhou        109.1922       28.1714          127       157     2012      07        28        210              0.448542      28.514465      13.541497       0.288866   -9999.000000       0.381000   -9999.000000       0.754000
57647     57647     guizhou        109.1922       28.1714          127       157     2012      07        29        211              0.439333      27.817932       0.197100       0.304872       0.265500   -9999.000000   -9999.000000   -9999.000000
57647     57647     guizhou        109.1922       28.1714          127       157     2012      07        30        212              0.427500      28.987762       0.408852       0.284242       0.264000       0.130200   -9999.000000       0.554000
57647     57647     guizhou        109.1922       28.1714          127       157     2012      07        31        213              0.407583      30.139343       0.837636       0.276026       0.271000       0.599400       0.155300   -9999.000000
57647     57647     guizhou        109.1922       28.1714          127       157     2012      08        01        214              0.386708      29.972961       0.733420       0.274938       0.203000   -9999.000000       0.154500       0.494000
57647     57647     guizhou        109.1922       28.1714          127       157     2012      08        02        215              0.370583      29.767273       3.996093       0.271711   -9999.000000       0.166900       0.146700       0.510000
57647     57647     guizhou        109.1922       28.1714          127       157     2012      08        03        216              0.361417      29.941711       0.000000       0.267417       0.216000   -9999.000000   -9999.000000   -9999.000000
57647     57647     guizhou        109.1922       28.1714          127       157     2012      08        04        217              0.358458      29.351685      10.357136       0.264374       0.222500       0.288800   -9999.000000       0.514000
57647     57647     guizhou        109.1922       28.1714          127       157     2012      08        05        218              0.374083      30.257965       3.912023       0.281163       0.226000       0.384000       0.155100   -9999.000000
57647     57647     guizhou        109.1922       28.1714          127       157     2012      08        06        219              0.382500      27.515198       0.000000       0.288760       0.239000   -9999.000000       0.134800       0.537000
57647     57647     guizhou        109.1922       28.1714          127       157     2012      08        07        220              0.373292      27.542877       0.502219       0.275696   -9999.000000       0.275800       0.126600       0.560000
57647     57647     guizhou        109.1922       28.1714          127       157     2012      08        08        221              0.362833      29.266998       2.818898       0.267842       0.237000   -9999.000000       0.122600   -9999.000000
57647     57647     guizhou        109.1922       28.1714          127       157     2012      08        09        222              0.357500      29.851227       0.327681       0.262391       0.207500       0.104600   -9999.000000       0.417000
57647     57647     guizhou        109.1922       28.1714          127       157     2012      08        10        223              0.354000      30.034454       0.000000       0.258156       0.219500       0.124200   -9999.000000   -9999.000000
57647     57647     guizhou        109.1922       28.1714          127       157     2012      08        11        224              0.351875      29.087494       0.000000       0.255173       0.217500   -9999.000000       0.127900       0.474000
57647     57647     guizhou        109.1922       28.1714          127       157     2012      08        12        225              0.347500      30.404419       0.627390       0.251228   -9999.000000       0.348700       0.129100   -9999.000000
57647     57647     guizhou        109.1922       28.1714          127       157     2012      08        13        226              0.414250      30.665100       7.108507       0.251106   -9999.000000       0.025100       0.105700   -9999.000000
57647     57647     guizhou        109.1922       28.1714          127       157     2012      08        14        227              0.430375      29.325775       0.767795       0.273096       0.225000   -9999.000000   -9999.000000       0.545000
57647     57647     guizhou        109.1922       28.1714          127       157     2012      08        15        228              0.423250      29.907043       2.897663       0.260123       0.209500       0.337900   -9999.000000   -9999.000000
57647     57647     guizhou        109.1922       28.1714          127       157     2012      08        16        229              0.412458      29.501068       0.267915       0.263996       0.227000   -9999.000000   -9999.000000       0.403000
57647     57647     guizhou        109.1922       28.1714          127       157     2012      08        17        230              0.390125      29.765930       0.738844       0.253503       0.213000       0.144200       0.105400   -9999.000000
57647     57647     guizhou        109.1922       28.1714          127       157     2012      08        18        231              0.368125      29.869568       1.336399       0.248139   -9999.000000       0.322900       0.107100       0.478000
57647     57647     guizhou        109.1922       28.1714          127       157     2012      08        19        232              0.354125      30.622955       0.249396       0.240894       0.231000   -9999.000000       0.101400       0.600000
57647     57647     guizhou        109.1922       28.1714          127       157     2012      08        20        233              0.385667      30.945068      11.897751       0.235079       0.207500       0.271400   -9999.000000   -9999.000000
57647     57647     guizhou        109.1922       28.1714          127       157     2012      08        21        234              0.451750      30.341187       5.747547       0.253803       0.230500   -9999.000000   -9999.000000       0.629000
57647     57647     guizhou        109.1922       28.1714          127       157     2012      08        22        235              0.439833      27.042755       0.000000       0.279318       0.222000       0.257600       0.077000   -9999.000000
57647     57647     guizhou        109.1922       28.1714          127       157     2012      08        23        236              0.431667      25.171814       0.000000       0.262836   -9999.000000       0.449500       0.079900       0.332000
57647     57647     guizhou        109.1922       28.1714          127       157     2012      08        24        237              0.417667      25.486298       0.000000       0.251880   -9999.000000   -9999.000000       0.078900       0.427000
57647     57647     guizhou        109.1922       28.1714          127       157     2012      08        25        238              0.000000      26.625397       3.065412       0.246349       0.219000       0.216100       0.076900   -9999.000000
57647     57647     guizhou        109.1922       28.1714          127       157     2012      08        26        239              0.377208      27.442413       0.000000       0.244248       0.216500       0.132400   -9999.000000       0.213000
57647     57647     guizhou        109.1922       28.1714          127       157     2012      08        27        240              0.362625      27.970520       0.000000       0.238331       0.213500       0.023400   -9999.000000   -9999.000000
57647     57647     guizhou        109.1922       28.1714          127       157     2012      08        28        241              0.355167      28.140198       1.389741       0.234197       0.192000       0.033400       0.067700       0.586000
57647     57647     guizhou        109.1922       28.1714          127       157     2012      08        29        242              0.352000      28.967651       0.670360       0.232072   -9999.000000   -9999.000000       0.069600   -9999.000000
57647     57647     guizhou        109.1922       28.1714          127       157     2012      08        30        243              0.352000      27.976166       7.953361       0.232773       0.212000       0.194200       0.068100       0.544000
57647     57647     guizhou        109.1922       28.1714          127       157     2012      08        31        244              0.391708      27.846100      15.632926       0.255816   -9999.000000       0.295900   -9999.000000       0.500000
57647     57647     guizhou        109.1922       28.1714          127       157     2012      09        01        245              0.437750      28.102295       0.728617       0.280973       0.182000   -9999.000000   -9999.000000   -9999.000000
57647     57647     guizhou        109.1922       28.1714          127       157     2012      09        02        246              0.436000      28.888763       4.260863       0.273634       0.176000       0.072100   -9999.000000       0.404000
57647     57647     guizhou        109.1922       28.1714          127       157     2012      09        03        247              0.439417      27.243530       0.501960       0.267763   -9999.000000   -9999.000000       0.069500   -9999.000000
57647     57647     guizhou        109.1922       28.1714          127       157     2012      09        04        248              0.430958      25.433136       0.000000       0.265105   -9999.000000       0.215300       0.068300       0.269000
57647     57647     guizhou        109.1922       28.1714          127       157     2012      09        05        249              0.422083      25.905914       2.797297       0.252781       0.181500       0.411300       0.067200       0.504000
57647     57647     guizhou        109.1922       28.1714          127       157     2012      09        06        250              0.407292      26.258728       0.352056       0.247081       0.174500   -9999.000000   -9999.000000   -9999.000000
57647     57647     guizhou        109.1922       28.1714          127       157     2012      09        07        251              0.387167      27.567596       0.000000       0.242007       0.180000       0.158600   -9999.000000       0.381000
57647     57647     guizhou        109.1922       28.1714          127       157     2012      09        08        252              0.367500      28.687042       0.208001       0.237503   -9999.000000   -9999.000000       0.067300   -9999.000000
57647     57647     guizhou        109.1922       28.1714          127       157     2012      09        09        253              0.358375      29.086334       3.306196       0.233588   -9999.000000       0.214100       0.079300       0.535000
57647     57647     guizhou        109.1922       28.1714          127       157     2012      09        10        254              0.370333      25.068420       0.505149       0.249787       0.202000       0.440800       0.116400   -9999.000000
57647     57647     guizhou        109.1922       28.1714          127       157     2012      09        11        255              0.374167      24.133667       1.027901       0.249649       0.144000   -9999.000000       0.111100   -9999.000000
57647     57647     guizhou        109.1922       28.1714          127       157     2012      09        12        256              0.424417      26.206635      28.866186       0.247611       0.163000       0.147800   -9999.000000       0.869000
57647     57647     guizhou        109.1922       28.1714          127       157     2012      09        13        257              0.438250      22.929779       0.690557       0.306408       0.147000       0.089700   -9999.000000   -9999.000000
57647     57647     guizhou        109.1922       28.1714          127       157     2012      09        14        258              0.429875      21.826416       0.000000       0.284378   -9999.000000       0.096200       0.111200       0.217000
57647     57647     guizhou        109.1922       28.1714          127       157     2012      09        15        259              0.420458      23.288116       0.186928       0.267142       0.146000       0.047700       0.093700   -9999.000000
57647     57647     guizhou        109.1922       28.1714          127       157     2012      09        16        260              0.411417      23.321472       1.577128       0.258853       0.161000   -9999.000000       0.115200       0.302000
57647     57647     guizhou        109.1922       28.1714          127       157     2012      09        17        261              0.407333      20.601349       0.000000       0.264037       0.147500       0.130600   -9999.000000       0.380000
57647     57647     guizhou        109.1922       28.1714          127       157     2012      09        18        262              0.388833      22.213104       0.000000       0.254499       0.141500       0.153800   -9999.000000   -9999.000000
57647     57647     guizhou        109.1922       28.1714          127       157     2012      09        19        263              0.374250      23.134033       0.000000       0.250215   -9999.000000   -9999.000000   -9999.000000       0.193000
57647     57647     guizhou        109.1922       28.1714          127       157     2012      09        20        264              0.378750      24.417877       8.937703       0.245349   -9999.000000       0.078700       0.108000   -9999.000000
57647     57647     guizhou        109.1922       28.1714          127       157     2012      09        21        265              0.441917      22.155121      13.329838       0.268987   -9999.000000   -9999.000000       0.103500       0.882000
57647     57647     guizhou        109.1922       28.1714          127       157     2012      09        22        266              0.437833      21.408875       2.333126       0.297798       0.146000       0.199600       0.107600       0.681000
57647     57647     guizhou        109.1922       28.1714          127       157     2012      09        23        267              0.443958      22.382629      10.179990       0.281420       0.163000   -9999.000000   -9999.000000   -9999.000000
57647     57647     guizhou        109.1922       28.1714          127       157     2012      09        24        268              0.440750      21.339874       2.653075       0.294650       0.155000   -9999.000000   -9999.000000       0.778000
57647     57647     guizhou        109.1922       28.1714          127       157     2012      09        25        269              0.438739      21.934296       2.486599       0.283962   -9999.000000       0.245600       0.081400   -9999.000000
57647     57647     guizhou        109.1922       28.1714          127       157     2012      09        26        270              0.439222      21.741425       1.062260       0.280385       0.138000   -9999.000000       0.074900       0.865000
57647     57647     guizhou        109.1922       28.1714          127       157     2012      09        27        271              0.435857      21.818970       0.000000       0.277176       0.139500       0.129400       0.075700   -9999.000000
57647     57647     guizhou        109.1922       28.1714          127       157     2012      09        28        272              0.427800      22.797852       1.300214       0.268260       0.135000   -9999.000000       0.072700       0.411000
57647     57647     guizhou        109.1922       28.1714          127       157     2012      09        29        273              0.423375      23.019806       0.000000       0.265825       0.130000   -9999.000000   -9999.000000       0.478000
57647     57647     guizhou        109.1922       28.1714          127       157     2012      09        30        274              0.413292      22.272522       0.000000       0.257254   -9999.000000       0.140300   -9999.000000   -9999.000000
57647     57647     guizhou        109.1922       28.1714          127       157     2012      10        01        275              0.398292      21.756348       0.196420       0.253175   -9999.000000   -9999.000000       0.098500       0.281000
57647     57647     guizhou        109.1922       28.1714          127       157     2012      10        02        276              0.379292      22.444336       2.037388       0.248361       0.105000       0.088200       0.110000   -9999.000000
57647     57647     guizhou        109.1922       28.1714          127       157     2012      10        03        277              0.382875      22.688782       2.605579       0.249785       0.119500       0.264800       0.108000       0.522000
57647     57647     guizhou        109.1922       28.1714          127       157     2012      10        04        278              0.427417      18.930664      11.145803       0.264526       0.117000   -9999.000000   -9999.000000       0.882000
57647     57647     guizhou        109.1922       28.1714          127       157     2012      10        05        279              0.442150      17.926300       4.045641       0.289036   -9999.000000       0.399500   -9999.000000   -9999.000000
57647     57647     guizhou        109.1922       28.1714          127       157     2012      10        06        280              0.435500      17.946686       0.612132       0.284112   -9999.000000       0.341300       0.112300       0.492000
57647     57647     guizhou        109.1922       28.1714          127       157     2012      10        07        281              0.435000      18.958649       0.786261       0.272070       0.120000       0.064000       0.117500   -9999.000000
57647     57647     guizhou        109.1922       28.1714          127       157     2012      10        08        282              0.436833      17.651672       0.847887       0.268718       0.125000       0.048400       0.062600       0.768000
57647     57647     guizhou        109.1922       28.1714          127       157     2012      10        09        283              0.432958      17.549530       0.104368       0.269357       0.109500   -9999.000000       0.061000   -9999.000000
57647     57647     guizhou        109.1922       28.1714          127       157     2012      10        10        284              0.428500      19.430054       0.000000       0.264515       0.111000       0.288000   -9999.000000   -9999.000000
57647     57647     guizhou        109.1922       28.1714          127       157     2012      10        11        285              0.425500      20.423798       0.882047       0.260695   -9999.000000       0.288800   -9999.000000       0.341000
57647     57647     guizhou        109.1922       28.1714          127       157     2012      10        12        286              0.424000      18.716705       5.151032       0.261525       0.136000   -9999.000000       0.068300   -9999.000000
57647     57647     guizhou        109.1922       28.1714          127       157     2012      10        13        287              0.438652      17.686615       3.599187       0.267351       0.123000       0.348700       0.064600       0.657000
57647     57647     guizhou        109.1922       28.1714          127       157     2012      10        14        288              0.441125      17.636932       4.196118       0.278955       0.135500   -9999.000000       0.068700   -9999.000000
57647     57647     guizhou        109.1922       28.1714          127       157     2012      10        15        289              0.438786      17.108093       2.116885       0.283211       0.137000       0.193600   -9999.000000       0.713000
57647     57647     guizhou        109.1922       28.1714          127       157     2012      10        16        290              0.438250      17.451569       1.934246       0.276663   -9999.000000   -9999.000000   -9999.000000       0.936000
57647     57647     guizhou        109.1922       28.1714          127       157     2012      10        17        291              0.431417      19.087860       0.527469       0.276254   -9999.000000   -9999.000000   -9999.000000   -9999.000000
57647     57647     guizhou        109.1922       28.1714          127       157     2012      10        18        292              0.424792      18.927368       0.079492       0.264313       0.113500       0.263700       0.142400       0.218000
57647     57647     guizhou        109.1922       28.1714          127       157     2012      10        19        293              0.417375      19.381317       2.452716       0.259482       0.113500   -9999.000000       0.137200   -9999.000000
57647     57647     guizhou        109.1922       28.1714          127       157     2012      10        20        294              0.438292      18.791229       7.250333       0.263007       0.115000       0.069000       0.146300       0.400000
57647     57647     guizhou        109.1922       28.1714          127       157     2012      10        21        295              0.435696      18.336670      13.602180       0.284819       0.153000   -9999.000000   -9999.000000       0.488000
57647     57647     guizhou        109.1922       28.1714          127       157     2012      10        22        296              0.438905      20.340912       2.934674       0.289960   -9999.000000   -9999.000000   -9999.000000   -9999.000000
57647     57647     guizhou        109.1922       28.1714          127       157     2012      10        23        297              0.431333      17.059082       0.491950       0.290694   -9999.000000       0.536100       0.059100       0.160000
57647     57647     guizhou        109.1922       28.1714          127       157     2012      10        24        298              0.438348      17.531830       4.692148       0.275298   -9999.000000       0.133100       0.067000   -9999.000000
57647     57647     guizhou        109.1922       28.1714          127       157     2012      10        25        299              0.000000      15.702759       3.569154       0.281681       0.183500   -9999.000000       0.064800       0.550000
57647     57647     guizhou        109.1922       28.1714          127       157     2012      10        26        300              0.435583      15.794952       0.890805       0.284974       0.174000       0.284100       0.057200   -9999.000000
57647     57647     guizhou        109.1922       28.1714          127       157     2012      10        27        301              0.431522      17.576569       0.000000       0.275236   -9999.000000   -9999.000000   -9999.000000       0.409000
57647     57647     guizhou        109.1922       28.1714          127       157     2012      10        28        302              0.000000      18.747803       1.094762       0.269353   -9999.000000       0.199700   -9999.000000       0.439000
57647     57647     guizhou        109.1922       28.1714          127       157     2012      10        29        303              0.438739      19.941803       3.638535       0.267667       0.155000       0.255500       0.125800   -9999.000000
57647     57647     guizhou        109.1922       28.1714          127       157     2012      10        30        304              0.435583      18.179382       0.000000       0.276512       0.159500   -9999.000000       0.124800       0.308000
57647     57647     guizhou        109.1922       28.1714          127       157     2012      10        31        305              0.429875      17.170380       0.532239       0.268927       0.154500       0.274400       0.126200   -9999.000000
57647     57647     guizhou        109.1922       28.1714          127       157     2012      11        01        306              0.424870      17.709991       0.360997       0.263379   -9999.000000   -9999.000000   -9999.000000       0.263000
57647     57647     guizhou        109.1922       28.1714          127       157     2012      11        02        307              0.418870      17.420013       8.048407       0.261550   -9999.000000       0.228800   -9999.000000       0.434000
57647     57647     guizhou        109.1922       28.1714          127       157     2012      11        03        308              0.434609      18.994141       0.894106       0.265918       0.119000       0.325900   -9999.000000   -9999.000000
57647     57647     guizhou        109.1922       28.1714          127       157     2012      11        04        309              0.431667      16.841187       1.751706       0.280577       0.131000   -9999.000000       0.129000       0.396000
57647     57647     guizhou        109.1922       28.1714          127       157     2012      11        05        310              0.435250      15.395844       0.250340       0.272020       0.137000       0.183400       0.112300   -9999.000000
57647     57647     guizhou        109.1922       28.1714          127       157     2012      11        06        311              0.434542      14.787598      14.420998       0.271265       0.135000       0.221900       0.113000       0.265000
57647     57647     guizhou        109.1922       28.1714          127       157     2012      11        07        312              0.446471      14.909088      21.058710       0.283248   -9999.000000       0.131800   -9999.000000   -9999.000000
57647     57647     guizhou        109.1922       28.1714          127       157     2012      11        08        313              0.438708      12.755585       0.795076       0.316382       0.157000       0.381000   -9999.000000   -9999.000000
57647     57647     guizhou        109.1922       28.1714          127       157     2012      11        09        314              0.437000      12.776947       1.740960       0.292602       0.161000   -9999.000000       0.117900       0.529000
57647     57647     guizhou        109.1922       28.1714          127       157     2012      11        10        315              0.435667      11.699585       0.163141       0.285176       0.136000       0.415400       0.115300   -9999.000000
57647     57647     guizhou        109.1922       28.1714          127       157     2012      11        11        316              0.429917      13.793976       0.000000       0.279274       0.105000       0.483300       0.115200       0.183000
57647     57647     guizhou        109.1922       28.1714          127       157     2012      11        12        317              0.427000      13.996063       0.000000       0.274767   -9999.000000       0.062200       0.110000   -9999.000000
57647     57647     guizhou        109.1922       28.1714          127       157     2012      11        13        318              0.000000      12.364746       0.529376       0.273940   -9999.000000       0.258600   -9999.000000       0.221000
57647     57647     guizhou        109.1922       28.1714          127       157     2012      11        14        319              0.426250      14.531860       6.728951       0.273002       0.130000   -9999.000000   -9999.000000       0.286000
57647     57647     guizhou        109.1922       28.1714          127       157     2012      11        15        320              0.442273      13.685791      17.985909       0.282246       0.132000       0.293900       0.117500   -9999.000000
57647     57647     guizhou        109.1922       28.1714          127       157     2012      11        16        321              0.440688      12.381989       0.284436       0.302254       0.113500       0.253000       0.111600       0.303000
57647     57647     guizhou        109.1922       28.1714          127       157     2012      11        17        322              0.000000      11.127838       0.175110       0.296351       0.107000   -9999.000000       0.107200   -9999.000000
57647     57647     guizhou        109.1922       28.1714          127       157     2012      11        18        323              0.428565      13.347595       0.474548       0.282355   -9999.000000       0.301000   -9999.000000       0.299000
57647     57647     guizhou        109.1922       28.1714          127       157     2012      11        19        324              0.425875      11.969208       0.647760       0.279190       0.122000   -9999.000000   -9999.000000       0.381000
57647     57647     guizhou        109.1922       28.1714          127       157     2012      11        20        325              0.427643      12.389313       0.673827       0.278368       0.128500       0.341900       0.081600   -9999.000000
57647     57647     guizhou        109.1922       28.1714          127       157     2012      11        21        326              0.435316      11.265839       3.523099       0.278791       0.113500       0.349500       0.085000       0.264000
57647     57647     guizhou        109.1922       28.1714          127       157     2012      11        22        327              0.442200      11.403534       0.605177       0.281624       0.116000   -9999.000000       0.079700   -9999.000000
57647     57647     guizhou        109.1922       28.1714          127       157     2012      11        23        328              0.436500      10.950806       0.753140       0.284063   -9999.000000       0.180000       0.078000       0.290000
57647     57647     guizhou        109.1922       28.1714          127       157     2012      11        24        329              0.436684       9.659119       2.335535       0.278521   -9999.000000   -9999.000000   -9999.000000   -9999.000000
57647     57647     guizhou        109.1922       28.1714          127       157     2012      11        25        330              0.437227       8.131226       1.837904       0.280766       0.116000       0.165800   -9999.000000       0.415000
57647     57647     guizhou        109.1922       28.1714          127       157     2012      11        26        331              0.435609       8.886230       0.518272       0.282101       0.107000       0.407200   -9999.000000       0.345000
57647     57647     guizhou        109.1922       28.1714          127       157     2012      11        27        332              0.432708       9.053284       0.000000       0.279819       0.112000   -9999.000000       0.063300   -9999.000000
57647     57647     guizhou        109.1922       28.1714          127       157     2012      11        28        333              0.430000       8.468109       0.168876       0.276869   -9999.000000       0.417500       0.064700       0.317000
57647     57647     guizhou        109.1922       28.1714          127       157     2012      11        29        334              0.430000       9.097900       0.561794       0.275874   -9999.000000       0.284800   -9999.000000   -9999.000000
57647     57647     guizhou        109.1922       28.1714          127       157     2012      11        30        335              0.437000       7.699432       2.003643       0.275269       0.125000       0.220600   -9999.000000       0.355000
57647     57647     guizhou        109.1922       28.1714          127       157     2012      12        01        336              0.436538       7.265778       0.506356       0.278150       0.111000       0.363100   -9999.000000       0.542000
57647     57647     guizhou        109.1922       28.1714          127       157     2012      12        02        337              0.435000       8.167816       0.000000       0.278781       0.105000   -9999.000000       0.063400   -9999.000000
57647     57647     guizhou        109.1922       28.1714          127       157     2012      12        03        338              0.430208       8.699341       0.000000       0.274901       0.102000       0.251200       0.073000       0.273000
57647     57647     guizhou        109.1922       28.1714          127       157     2012      12        04        339              0.427000       9.780182       0.000000       0.272229   -9999.000000       0.129300       0.074100   -9999.000000
57647     57647     guizhou        109.1922       28.1714          127       157     2012      12        05        340              0.424875       7.833344       0.259991       0.272012   -9999.000000   -9999.000000   -9999.000000       0.094000
57647     57647     guizhou        109.1922       28.1714          127       157     2012      12        06        341              0.420000       9.655640       0.000000       0.270320       0.105000       0.285200   -9999.000000   -9999.000000
57647     57647     guizhou        109.1922       28.1714          127       157     2012      12        07        342              0.418125       7.902313       0.000000       0.269812       0.103500   -9999.000000       0.071800       0.162000
57647     57647     guizhou        109.1922       28.1714          127       157     2012      12        08        343              0.414917       7.650818       1.602252       0.269978       0.103000       0.279100       0.074900       0.277000
57647     57647     guizhou        109.1922       28.1714          127       157     2012      12        09        344              0.425636       9.974640      11.196322       0.270457   -9999.000000       0.362600       0.077900   -9999.000000
57647     57647     guizhou        109.1922       28.1714          127       157     2012      12        10        345              0.444312       6.764069       9.481605       0.294955   -9999.000000   -9999.000000       0.052400       0.243000
57647     57647     guizhou        109.1922       28.1714          127       157     2012      12        11        346              0.435667       4.909851       1.101336       0.301920   -9999.000000       0.314200   -9999.000000   -9999.000000
57647     57647     guizhou        109.1922       28.1714          127       157     2012      12        12        347              0.435000       5.597076       4.162273       0.285609       0.123500   -9999.000000   -9999.000000       0.260000
57647     57647     guizhou        109.1922       28.1714          127       157     2012      12        13        348              0.442000       5.570068       1.241174       0.286224       0.115000       0.363000       0.057200       0.513000
57647     57647     guizhou        109.1922       28.1714          127       157     2012      12        14        349              0.438154       5.825684       0.367553       0.284280       0.108000   -9999.000000       0.057000   -9999.000000
57647     57647     guizhou        109.1922       28.1714          127       157     2012      12        15        350              0.000000       6.547913       0.092322       0.280763   -9999.000000   -9999.000000       0.054600       0.277000
57647     57647     guizhou        109.1922       28.1714          127       157     2012      12        16        351              0.435000       6.611298       0.590784       0.277224       0.115000       0.259200   -9999.000000   -9999.000000
57647     57647     guizhou        109.1922       28.1714          127       157     2012      12        17        352              0.440333       6.583191       1.504740       0.276381       0.126000       0.166700   -9999.000000       0.421000
57647     57647     guizhou        109.1922       28.1714          127       157     2012      12        18        353              0.436500       5.298187       0.000000       0.280422       0.110000       0.045200   -9999.000000       0.283000
57647     57647     guizhou        109.1922       28.1714          127       157     2012      12        19        354              0.435000       4.724884       0.679759       0.276060       0.117000       0.320600       0.055000   -9999.000000
57647     57647     guizhou        109.1922       28.1714          127       157     2012      12        20        355              0.000000       2.957123       0.215190       0.276189   -9999.000000   -9999.000000       0.050300       0.273000
57647     57647     guizhou        109.1922       28.1714          127       157     2012      12        21        356              0.435211       3.259338       0.134358       0.275641   -9999.000000       0.286600       0.052400   -9999.000000
57647     57647     guizhou        109.1922       28.1714          127       157     2012      12        22        357              0.432500       3.803040       0.000000       0.274133   -9999.000000       0.103300   -9999.000000       0.248000
57647     57647     guizhou        109.1922       28.1714          127       157     2012      12        23        358              0.429125       3.740112       0.000000       0.272986       0.102000   -9999.000000   -9999.000000   -9999.000000
57647     57647     guizhou        109.1922       28.1714          127       157     2012      12        24        359              0.427000       4.238983       0.555734       0.269981       0.097000       0.492200       0.059000       0.123000
57647     57647     guizhou        109.1922       28.1714          127       157     2012      12        25        360              0.425600       5.632141       0.598329       0.271407   -9999.000000   -9999.000000       0.062400       0.130000
57647     57647     guizhou        109.1922       28.1714          127       157     2012      12        26        361              0.000000       3.519592       0.655364       0.272228   -9999.000000   -9999.000000       0.060600   -9999.000000
57647     57647     guizhou        109.1922       28.1714          127       157     2012      12        27        362              0.440833       2.066925       3.328476       0.270776   -9999.000000   -9999.000000       0.057400       0.307000
57647     57647     guizhou        109.1922       28.1714          127       157     2012      12        28        363              0.437000       2.472321       3.233537       0.278270   -9999.000000   -9999.000000   -9999.000000   -9999.000000
57647     57647     guizhou        109.1922       28.1714          127       157     2012      12        29        364              0.000000       2.249847       3.303136       0.276920   -9999.000000   -9999.000000   -9999.000000       0.354000
57647     57647     guizhou        109.1922       28.1714          127       157     2012      12        30        365              0.000000       2.539734       1.033871       0.282517   -9999.000000   -9999.000000       0.052600       0.287000
57647     57647     guizhou        109.1922       28.1714          127       157     2012      12        31        366              0.430667       4.030212       0.363409       0.275222   -9999.000000   -9999.000000       0.065300   -9999.000000
