# Supplementary material for: Research on Fusing Multisatellite Soil Moisture Data Based on Bayesian Model Averaging
Source: Hindawi journal article supplement (doi:10.1155/2018/9310838), 2018-06-25
Supplement: f1 [file 9310838.f1.zip › 2012_sm00-10cm_daily_ZDB_ZHY_57662_366days_allin.txt]

57662     57662     hunan          111.6800       29.0797          124       167     2012      01        01        001              0.000000   -9999.000000       0.000000   -9999.000000   -9999.000000   -9999.000000       0.112300   -9999.000000
57662     57662     hunan          111.6800       29.0797          124       167     2012      01        02        002              0.295750       4.760651       0.280207       0.348081       0.147000       0.246700   -9999.000000       0.089000
57662     57662     hunan          111.6800       29.0797          124       167     2012      01        03        003              0.000000       3.406433       0.000000       0.349574   -9999.000000   -9999.000000   -9999.000000       0.192000
57662     57662     hunan          111.6800       29.0797          124       167     2012      01        04        004              0.295917       2.505676       0.000000       0.339923   -9999.000000       0.211200       0.104600   -9999.000000
57662     57662     hunan          111.6800       29.0797          124       167     2012      01        05        005              0.295000       3.038452       0.000000       0.341223   -9999.000000       0.272400       0.104500       0.251000
57662     57662     hunan          111.6800       29.0797          124       167     2012      01        06        006              0.295609       2.182220       0.000000       0.332519   -9999.000000   -9999.000000       0.121600   -9999.000000
57662     57662     hunan          111.6800       29.0797          124       167     2012      01        07        007              0.295208       4.136414       0.000000       0.341304   -9999.000000       0.246400       0.106000       0.098000
57662     57662     hunan          111.6800       29.0797          124       167     2012      01        08        008              0.000000       2.651093       0.000000       0.340106   -9999.000000       0.395500   -9999.000000   -9999.000000
57662     57662     hunan          111.6800       29.0797          124       167     2012      01        09        009              0.295417       2.389252       0.000000       0.338776   -9999.000000       0.083000   -9999.000000   -9999.000000
57662     57662     hunan          111.6800       29.0797          124       167     2012      01        10        010              0.295417       2.918549       0.000000       0.340604   -9999.000000       0.184600       0.094900       0.294000
57662     57662     hunan          111.6800       29.0797          124       167     2012      01        11        011              0.296667       3.289154       0.000000       0.341765   -9999.000000   -9999.000000       0.103100   -9999.000000
57662     57662     hunan          111.6800       29.0797          124       167     2012      01        12        012              0.294208       3.486969       0.581400       0.340832   -9999.000000       0.105700       0.091700       0.121000
57662     57662     hunan          111.6800       29.0797          124       167     2012      01        13        013              0.295708       2.694611       4.509382       0.339923   -9999.000000       0.266800   -9999.000000   -9999.000000
57662     57662     hunan          111.6800       29.0797          124       167     2012      01        14        014              0.299625       2.554413       7.493043       0.344828   -9999.000000   -9999.000000   -9999.000000       0.395000
57662     57662     hunan          111.6800       29.0797          124       167     2012      01        15        015              0.302042       2.341278       1.096021       0.346500   -9999.000000       0.225000   -9999.000000       0.765000
57662     57662     hunan          111.6800       29.0797          124       167     2012      01        16        016              0.303526       1.499634       0.196061       0.348720   -9999.000000   -9999.000000       0.076900   -9999.000000
57662     57662     hunan          111.6800       29.0797          124       167     2012      01        17        017              0.000000       4.121979       3.103116       0.345066   -9999.000000   -9999.000000       0.086700       0.395000
57662     57662     hunan          111.6800       29.0797          124       167     2012      01        18        018              0.303292       3.635651       3.400712       0.345728   -9999.000000       0.207300       0.078200   -9999.000000
57662     57662     hunan          111.6800       29.0797          124       167     2012      01        19        019              0.302750       3.751404       1.003133       0.348710   -9999.000000   -9999.000000   -9999.000000       0.458000
57662     57662     hunan          111.6800       29.0797          124       167     2012      01        20        020              0.302833       3.080963       4.933926       0.347717   -9999.000000       0.285000   -9999.000000       0.498000
57662     57662     hunan          111.6800       29.0797          124       167     2012      01        21        021              0.301458       2.804688       1.514032       0.347211   -9999.000000   -9999.000000       0.071300   -9999.000000
57662     57662     hunan          111.6800       29.0797          124       167     2012      01        22        022              0.300917       1.074615       0.649774       0.319513   -9999.000000   -9999.000000       0.070200       0.196000
57662     57662     hunan          111.6800       29.0797          124       167     2012      01        23        023              0.301476       0.061188       3.274092       0.252195   -9999.000000       0.173300       0.107300   -9999.000000
57662     57662     hunan          111.6800       29.0797          124       167     2012      01        24        024              0.298900       0.752930       0.851543       0.281467   -9999.000000   -9999.000000   -9999.000000       0.228000
57662     57662     hunan          111.6800       29.0797          124       167     2012      01        25        025              0.295739       1.707367       0.663283       0.301030   -9999.000000       0.272500   -9999.000000   -9999.000000
57662     57662     hunan          111.6800       29.0797          124       167     2012      01        26        026              0.301571       3.196503       0.190614       0.324171   -9999.000000       0.187700   -9999.000000       0.404000
57662     57662     hunan          111.6800       29.0797          124       167     2012      01        27        027              0.302591       3.698944       0.000000       0.337958   -9999.000000       0.075500       0.098200   -9999.000000
57662     57662     hunan          111.6800       29.0797          124       167     2012      01        28        028              0.299316       3.106628       0.000000       0.340587   -9999.000000       0.483500       0.097700   -9999.000000
57662     57662     hunan          111.6800       29.0797          124       167     2012      01        29        029              0.302500       4.151367       0.000000       0.339541   -9999.000000   -9999.000000       0.106600       0.230000
57662     57662     hunan          111.6800       29.0797          124       167     2012      01        30        030              0.300045       4.490479       0.000000       0.339279   -9999.000000       0.162200   -9999.000000   -9999.000000
57662     57662     hunan          111.6800       29.0797          124       167     2012      01        31        031              0.296583       4.426483       0.000000       0.338191   -9999.000000       0.565900   -9999.000000       0.241000
57662     57662     hunan          111.6800       29.0797          124       167     2012      02        01        032              0.300882       7.266907       0.000000       0.337076   -9999.000000   -9999.000000   -9999.000000       0.230000
57662     57662     hunan          111.6800       29.0797          124       167     2012      02        02        033              0.299750       5.401672       0.000000       0.336549   -9999.000000       0.347600       0.115800   -9999.000000
57662     57662     hunan          111.6800       29.0797          124       167     2012      02        03        034              0.296783       2.558350       0.000000       0.329451   -9999.000000   -9999.000000       0.136600       0.145000
57662     57662     hunan          111.6800       29.0797          124       167     2012      02        04        035              0.303187       6.110748       0.000000       0.333116   -9999.000000       0.250200       0.110700   -9999.000000
57662     57662     hunan          111.6800       29.0797          124       167     2012      02        05        036              0.301625       5.059540       9.661825       0.335012   -9999.000000       0.259400   -9999.000000       0.845000
57662     57662     hunan          111.6800       29.0797          124       167     2012      02        06        037              0.305063       3.435760       0.732221       0.346596   -9999.000000   -9999.000000   -9999.000000   -9999.000000
57662     57662     hunan          111.6800       29.0797          124       167     2012      02        07        038              0.302929       3.815674       0.543077       0.347135   -9999.000000       0.268100       0.078300   -9999.000000
57662     57662     hunan          111.6800       29.0797          124       167     2012      02        08        039              0.302870       3.997955       0.346429       0.335072   -9999.000000   -9999.000000       0.114400       0.343000
57662     57662     hunan          111.6800       29.0797          124       167     2012      02        09        040              0.302208       2.903229       0.401514       0.329883   -9999.000000       0.162100       0.109500   -9999.000000
57662     57662     hunan          111.6800       29.0797          124       167     2012      02        10        041              0.299444       2.346130       3.060575       0.326563   -9999.000000       0.277000       0.088600       0.032000
57662     57662     hunan          111.6800       29.0797          124       167     2012      02        11        042              0.301333       3.722107       1.622243       0.330193   -9999.000000   -9999.000000   -9999.000000   -9999.000000
57662     57662     hunan          111.6800       29.0797          124       167     2012      02        12        043              0.301625       4.116119       0.864485       0.337800   -9999.000000       0.344200   -9999.000000       0.690000
57662     57662     hunan          111.6800       29.0797          124       167     2012      02        13        044              0.302875       3.355408       0.228289       0.339036   -9999.000000       0.426000   -9999.000000       0.494000
57662     57662     hunan          111.6800       29.0797          124       167     2012      02        14        045              0.303250       3.612366       0.782845       0.337676   -9999.000000       0.265100       0.163100   -9999.000000
57662     57662     hunan          111.6800       29.0797          124       167     2012      02        15        046              0.303458       3.339600       0.199429       0.337543   -9999.000000       0.354600       0.136800       0.351000
57662     57662     hunan          111.6800       29.0797          124       167     2012      02        16        047              0.303350       3.395294       0.000000       0.336834   -9999.000000   -9999.000000   -9999.000000   -9999.000000
57662     57662     hunan          111.6800       29.0797          124       167     2012      02        17        048              0.303333       4.080536       0.000000       0.335818       0.152000       0.104200   -9999.000000       0.196000
57662     57662     hunan          111.6800       29.0797          124       167     2012      02        18        049              0.301684       6.174530       0.000000       0.333647   -9999.000000   -9999.000000   -9999.000000       0.331000
57662     57662     hunan          111.6800       29.0797          124       167     2012      02        19        050              0.292909       5.128510       1.893692       0.332378   -9999.000000   -9999.000000       0.138600   -9999.000000
57662     57662     hunan          111.6800       29.0797          124       167     2012      02        20        051              0.304600       7.836121       0.964026       0.330610   -9999.000000       0.324700       0.097300       0.163000
57662     57662     hunan          111.6800       29.0797          124       167     2012      02        21        052              0.304364       6.260101      16.304190       0.332771   -9999.000000   -9999.000000   -9999.000000   -9999.000000
57662     57662     hunan          111.6800       29.0797          124       167     2012      02        22        053              0.000000       6.113251       4.064657       0.349964   -9999.000000       0.301700   -9999.000000       0.470000
57662     57662     hunan          111.6800       29.0797          124       167     2012      02        23        054              0.304286       6.886475       1.353810       0.354942       0.140000       0.109500   -9999.000000   -9999.000000
57662     57662     hunan          111.6800       29.0797          124       167     2012      02        24        055              0.305000       6.166626       0.000000       0.345725   -9999.000000   -9999.000000       0.115100       0.260000
57662     57662     hunan          111.6800       29.0797          124       167     2012      02        25        056              0.304857       4.416626       0.235420       0.340714   -9999.000000       0.230900       0.087300       0.276000
57662     57662     hunan          111.6800       29.0797          124       167     2012      02        26        057              0.305077       3.109497       0.000000       0.338080   -9999.000000   -9999.000000       0.116700   -9999.000000
57662     57662     hunan          111.6800       29.0797          124       167     2012      02        27        058              0.304059       3.593994       0.409025       0.337834   -9999.000000       0.149700   -9999.000000       0.345000
57662     57662     hunan          111.6800       29.0797          124       167     2012      02        28        059              0.303417       3.513031       2.106375       0.336987   -9999.000000   -9999.000000   -9999.000000   -9999.000000
57662     57662     hunan          111.6800       29.0797          124       167     2012      02        29        060              0.000000   -9999.000000       0.945221   -9999.000000   -9999.000000   -9999.000000   -9999.000000   -9999.000000
57662     57662     hunan          111.6800       29.0797          124       167     2012      03        01        061              0.304250       6.702393       0.393176       0.335883   -9999.000000       0.300100       0.091700       0.303000
57662     57662     hunan          111.6800       29.0797          124       167     2012      03        02        062              0.304292       7.518097       4.487997       0.335512   -9999.000000   -9999.000000       0.093500   -9999.000000
57662     57662     hunan          111.6800       29.0797          124       167     2012      03        03        063              0.304083       6.712982      19.363852       0.340321   -9999.000000       0.187600       0.098800       0.686000
57662     57662     hunan          111.6800       29.0797          124       167     2012      03        04        064              0.303542       5.333740       2.710543       0.358986   -9999.000000       0.354500   -9999.000000   -9999.000000
57662     57662     hunan          111.6800       29.0797          124       167     2012      03        05        065              0.302474       4.280914       0.140028       0.355007   -9999.000000   -9999.000000   -9999.000000       0.317000
57662     57662     hunan          111.6800       29.0797          124       167     2012      03        06        066              0.303542       7.348602       1.488278       0.345122   -9999.000000       0.153400   -9999.000000   -9999.000000
57662     57662     hunan          111.6800       29.0797          124       167     2012      03        07        067              0.000000       6.395905       6.136441       0.344966   -9999.000000   -9999.000000       0.133700   -9999.000000
57662     57662     hunan          111.6800       29.0797          124       167     2012      03        08        068              0.303000       5.843445       5.595644       0.349582   -9999.000000   -9999.000000       0.146300       0.447000
57662     57662     hunan          111.6800       29.0797          124       167     2012      03        09        069              0.303000       4.899414       0.401081       0.354690   -9999.000000       0.152200       0.123300   -9999.000000
57662     57662     hunan          111.6800       29.0797          124       167     2012      03        10        070              0.302000       4.819580       0.186711       0.349318       0.155000   -9999.000000   -9999.000000       0.222000
57662     57662     hunan          111.6800       29.0797          124       167     2012      03        11        071              0.301231       9.052124       0.000000       0.343636   -9999.000000       0.323800   -9999.000000   -9999.000000
57662     57662     hunan          111.6800       29.0797          124       167     2012      03        12        072              0.301500       9.161957       0.359063       0.342056   -9999.000000       0.307000       0.142200       0.282000
57662     57662     hunan          111.6800       29.0797          124       167     2012      03        13        073              0.303067       8.044373       0.000000       0.341964   -9999.000000   -9999.000000       0.118200       0.268000
57662     57662     hunan          111.6800       29.0797          124       167     2012      03        14        074              0.303923      11.928772       0.548519       0.338893       0.227000       0.418600   -9999.000000   -9999.000000
57662     57662     hunan          111.6800       29.0797          124       167     2012      03        15        075              0.304222      10.675842       0.000000       0.339890       0.139000   -9999.000000       0.134800       0.207000
57662     57662     hunan          111.6800       29.0797          124       167     2012      03        16        076              0.304333      10.886200       0.136147       0.340085       0.135000       0.102900   -9999.000000   -9999.000000
57662     57662     hunan          111.6800       29.0797          124       167     2012      03        17        077              0.303667      10.754486       0.709953       0.338752   -9999.000000       0.304800   -9999.000000       0.302000
57662     57662     hunan          111.6800       29.0797          124       167     2012      03        18        078              0.303857      12.855530       1.910255       0.336995   -9999.000000   -9999.000000       0.143800       0.325000
57662     57662     hunan          111.6800       29.0797          124       167     2012      03        19        079              0.301667      13.301117       0.162181       0.339843   -9999.000000       0.284300       0.146300   -9999.000000
57662     57662     hunan          111.6800       29.0797          124       167     2012      03        20        080              0.299792       8.778839       0.079732       0.337734   -9999.000000   -9999.000000       0.149400       0.447000
57662     57662     hunan          111.6800       29.0797          124       167     2012      03        21        081              0.301417       6.903137       8.698175       0.336390       0.209000       0.224400   -9999.000000   -9999.000000
57662     57662     hunan          111.6800       29.0797          124       167     2012      03        22        082              0.303208       7.870728      21.916796       0.344577       0.175000       0.156700   -9999.000000       0.744000
57662     57662     hunan          111.6800       29.0797          124       167     2012      03        23        083              0.303667       6.782562       0.275010       0.370437   -9999.000000   -9999.000000       0.132900   -9999.000000
57662     57662     hunan          111.6800       29.0797          124       167     2012      03        24        084              0.304500      12.837616       0.379251       0.349172   -9999.000000       0.170700       0.128600       0.134000
57662     57662     hunan          111.6800       29.0797          124       167     2012      03        25        085              0.000000      14.193756       0.000000       0.340762       0.111000       0.217700       0.129300       0.437000
57662     57662     hunan          111.6800       29.0797          124       167     2012      03        26        086              0.302071      15.885101       0.094269       0.337348       0.092000       0.043100       0.161100   -9999.000000
57662     57662     hunan          111.6800       29.0797          124       167     2012      03        27        087              0.302000      17.447205       0.629972       0.335090       0.104000       0.246900   -9999.000000       0.428000
57662     57662     hunan          111.6800       29.0797          124       167     2012      03        28        088              0.299778      18.927979       1.666507       0.333645   -9999.000000   -9999.000000   -9999.000000   -9999.000000
57662     57662     hunan          111.6800       29.0797          124       167     2012      03        29        089              0.303125      17.336029      21.686775       0.336669   -9999.000000       0.118000       0.192800       0.942000
57662     57662     hunan          111.6800       29.0797          124       167     2012      03        30        090              0.304059      16.719666       3.371440       0.354664       0.145000       0.386900       0.169900       0.688000
57662     57662     hunan          111.6800       29.0797          124       167     2012      03        31        091              0.302643      15.373383       0.408357       0.358014       0.107000   -9999.000000       0.173400   -9999.000000
57662     57662     hunan          111.6800       29.0797          124       167     2012      04        01        092              0.301900      17.349243       1.050408       0.341876       0.144000       0.149000       0.191300       0.235000
57662     57662     hunan          111.6800       29.0797          124       167     2012      04        02        093              0.301750      19.374390       0.000000       0.337406   -9999.000000   -9999.000000   -9999.000000   -9999.000000
57662     57662     hunan          111.6800       29.0797          124       167     2012      04        03        094              0.296500      21.109985       0.289124       0.333418   -9999.000000       0.324500   -9999.000000       0.219000
57662     57662     hunan          111.6800       29.0797          124       167     2012      04        04        095              0.301167      17.623322      18.048960       0.332104   -9999.000000       0.391900       0.162100   -9999.000000
57662     57662     hunan          111.6800       29.0797          124       167     2012      04        05        096              0.303882      12.854034       1.814177       0.360756       0.148000   -9999.000000       0.134600   -9999.000000
57662     57662     hunan          111.6800       29.0797          124       167     2012      04        06        097              0.304462      17.018646       0.199335       0.343796       0.145000       0.275100       0.162200       0.383000
57662     57662     hunan          111.6800       29.0797          124       167     2012      04        07        098              0.305167      17.916809       0.191021       0.339749   -9999.000000   -9999.000000   -9999.000000   -9999.000000
57662     57662     hunan          111.6800       29.0797          124       167     2012      04        08        099              0.305500      17.142395       1.993371       0.339069   -9999.000000       0.294200   -9999.000000       0.177000
57662     57662     hunan          111.6800       29.0797          124       167     2012      04        09        100              0.304643      18.260345       1.627962       0.338510   -9999.000000       0.274300       0.127400   -9999.000000
57662     57662     hunan          111.6800       29.0797          124       167     2012      04        10        101              0.304750      17.900604      16.114975       0.343594   -9999.000000   -9999.000000       0.148500       0.722000
57662     57662     hunan          111.6800       29.0797          124       167     2012      04        11        102              0.305294      17.148804       5.701301       0.361346       0.173000       0.272100       0.150100       0.904000
57662     57662     hunan          111.6800       29.0797          124       167     2012      04        12        103              0.305571      17.551453      39.954849       0.355048   -9999.000000   -9999.000000       0.157800   -9999.000000
57662     57662     hunan          111.6800       29.0797          124       167     2012      04        13        104              0.304353      14.460907       2.129751       0.382964   -9999.000000       0.196200   -9999.000000       0.295000
57662     57662     hunan          111.6800       29.0797          124       167     2012      04        14        105              0.303261      16.948578       2.222984       0.363271   -9999.000000       0.308300   -9999.000000   -9999.000000
57662     57662     hunan          111.6800       29.0797          124       167     2012      04        15        106              0.304000      15.041595      12.389345       0.361407   -9999.000000   -9999.000000       0.153800       0.705000
57662     57662     hunan          111.6800       29.0797          124       167     2012      04        16        107              0.304591      14.283356       1.230927       0.369324       0.169000       0.389600       0.217400       0.606000
57662     57662     hunan          111.6800       29.0797          124       167     2012      04        17        108              0.305625      15.807831       0.000000       0.360293   -9999.000000   -9999.000000       0.229400   -9999.000000
57662     57662     hunan          111.6800       29.0797          124       167     2012      04        18        109              0.298042      15.911865       1.081212       0.356468   -9999.000000   -9999.000000   -9999.000000       0.210000
57662     57662     hunan          111.6800       29.0797          124       167     2012      04        19        110              0.296417      19.381897       0.000000       0.351442       0.267000       0.520200   -9999.000000   -9999.000000
57662     57662     hunan          111.6800       29.0797          124       167     2012      04        20        111              0.298167      21.273804       3.462092       0.347619       0.231000   -9999.000000   -9999.000000       0.610000
57662     57662     hunan          111.6800       29.0797          124       167     2012      04        21        112              0.297208      17.121307       0.442766       0.352087       0.172000       0.377900       0.195900   -9999.000000
57662     57662     hunan          111.6800       29.0797          124       167     2012      04        22        113              0.294167      21.302368       5.464754       0.343080       0.171000       0.184200       0.208900       0.266000
57662     57662     hunan          111.6800       29.0797          124       167     2012      04        23        114              0.292250      22.909576       1.454818       0.338610   -9999.000000   -9999.000000       0.289100       0.450000
57662     57662     hunan          111.6800       29.0797          124       167     2012      04        24        115              0.294083      23.778900       3.885010       0.338540   -9999.000000       0.306700   -9999.000000   -9999.000000
57662     57662     hunan          111.6800       29.0797          124       167     2012      04        25        116              0.000000      21.469421       4.049170       0.345781   -9999.000000       0.247900   -9999.000000       0.579000
57662     57662     hunan          111.6800       29.0797          124       167     2012      04        26        117              0.295917      18.763031       0.710376       0.346264       0.182000       0.359400       0.253300   -9999.000000
57662     57662     hunan          111.6800       29.0797          124       167     2012      04        27        118              0.294792      21.514709       0.157604       0.336489       0.160000       0.485000       0.240900       0.333000
57662     57662     hunan          111.6800       29.0797          124       167     2012      04        28        119              0.300625      23.207642      19.304859       0.332141   -9999.000000   -9999.000000       0.269800       0.417000
57662     57662     hunan          111.6800       29.0797          124       167     2012      04        29        120              0.303083      21.437103       5.449708       0.360327   -9999.000000       0.351100       0.298000   -9999.000000
57662     57662     hunan          111.6800       29.0797          124       167     2012      04        30        121              0.303917      22.078979      19.425222       0.353490       0.415000       0.632100   -9999.000000       0.900000
57662     57662     hunan          111.6800       29.0797          124       167     2012      05        01        122              0.303333      20.227142      10.312098       0.366969       0.267000       0.277500   -9999.000000   -9999.000000
57662     57662     hunan          111.6800       29.0797          124       167     2012      05        02        123              0.303000      20.384583       2.326634       0.360812       0.214000       0.399800       0.176300       0.711000
57662     57662     hunan          111.6800       29.0797          124       167     2012      05        03        124              0.303583      21.699677       5.244669       0.352051       0.243000   -9999.000000       0.209600   -9999.000000
57662     57662     hunan          111.6800       29.0797          124       167     2012      05        04        125              0.303000      20.800110       0.000000       0.356754   -9999.000000       0.238700       0.208300   -9999.000000
57662     57662     hunan          111.6800       29.0797          124       167     2012      05        05        126              0.302500      22.991730       0.000000       0.348796       0.336000   -9999.000000   -9999.000000       0.619000
57662     57662     hunan          111.6800       29.0797          124       167     2012      05        06        127              0.300917      25.417542       0.000000       0.343230       0.273500   -9999.000000   -9999.000000   -9999.000000
57662     57662     hunan          111.6800       29.0797          124       167     2012      05        07        128              0.298625      27.295929       0.380910       0.340051   -9999.000000       0.292100   -9999.000000       0.537000
57662     57662     hunan          111.6800       29.0797          124       167     2012      05        08        129              0.300083      28.268707       5.876427       0.338386       0.199000   -9999.000000       0.216900   -9999.000000
57662     57662     hunan          111.6800       29.0797          124       167     2012      05        09        130              0.303250      25.632904      11.661906       0.346241   -9999.000000       0.551800       0.233500       1.000000
57662     57662     hunan          111.6800       29.0797          124       167     2012      05        10        131              0.302458      23.491608       0.537948       0.359395       0.337000   -9999.000000       0.196100       0.791000
57662     57662     hunan          111.6800       29.0797          124       167     2012      05        11        132              0.302750      26.280762      26.632437       0.341887       0.330000   -9999.000000   -9999.000000   -9999.000000
57662     57662     hunan          111.6800       29.0797          124       167     2012      05        12        133              0.303583      26.684235      20.053667       0.362883       0.389000       0.450900   -9999.000000       0.694000
57662     57662     hunan          111.6800       29.0797          124       167     2012      05        13        134              0.304167      20.698059      29.946690       0.373402       0.334500   -9999.000000       0.181600   -9999.000000
57662     57662     hunan          111.6800       29.0797          124       167     2012      05        14        135              0.303500      20.060638       6.299740       0.384298   -9999.000000       0.521900       0.255200       0.878000
57662     57662     hunan          111.6800       29.0797          124       167     2012      05        15        136              0.303000      18.869873       0.300652       0.411776   -9999.000000       0.293700       0.224700       0.656000
57662     57662     hunan          111.6800       29.0797          124       167     2012      05        16        137              0.302708      21.120758       0.000000       0.371004       0.225000   -9999.000000       0.223200   -9999.000000
57662     57662     hunan          111.6800       29.0797          124       167     2012      05        17        138              0.301000      23.084320       0.264684       0.358731       0.259500       0.368700   -9999.000000       0.435000
57662     57662     hunan          111.6800       29.0797          124       167     2012      05        18        139              0.301958      25.591156      22.440102       0.350411       0.279500       0.404200   -9999.000000   -9999.000000
57662     57662     hunan          111.6800       29.0797          124       167     2012      05        19        140              0.303417      24.302216       0.417296       0.363802       0.233000       0.262600       0.226000       0.635000
57662     57662     hunan          111.6800       29.0797          124       167     2012      05        20        141              0.301792      25.220245       0.561164       0.356682   -9999.000000       0.259100       0.201800   -9999.000000
57662     57662     hunan          111.6800       29.0797          124       167     2012      05        21        142              0.299792      25.497986       2.981306       0.345192       0.468000   -9999.000000       0.155400       0.289000
57662     57662     hunan          111.6800       29.0797          124       167     2012      05        22        143              0.303833      24.681763      29.195902       0.345815       0.500000       0.282900   -9999.000000       0.920000
57662     57662     hunan          111.6800       29.0797          124       167     2012      05        23        144              0.303458      21.196045      11.788048       0.374629   -9999.000000       0.500100   -9999.000000   -9999.000000
57662     57662     hunan          111.6800       29.0797          124       167     2012      05        24        145              0.304000      20.019897      26.970566       0.362646       0.384000   -9999.000000   -9999.000000       1.000000
57662     57662     hunan          111.6800       29.0797          124       167     2012      05        25        146              0.000000      19.051178       1.769732       0.380331   -9999.000000       0.262700       0.194200   -9999.000000
57662     57662     hunan          111.6800       29.0797          124       167     2012      05        26        147              0.303208      19.495911       0.000000       0.373112       0.493000   -9999.000000       0.203700       0.529000
57662     57662     hunan          111.6800       29.0797          124       167     2012      05        27        148              0.302292      23.789490       0.415365       0.361088       0.423000       0.609400       0.165000       0.635000
57662     57662     hunan          111.6800       29.0797          124       167     2012      05        28        149              0.302083      24.382111       1.095759       0.354982       0.406500       0.521600   -9999.000000   -9999.000000
57662     57662     hunan          111.6800       29.0797          124       167     2012      05        29        150              0.303792      24.012177      18.890921       0.352107   -9999.000000   -9999.000000   -9999.000000       0.886000
57662     57662     hunan          111.6800       29.0797          124       167     2012      05        30        151              0.303167      22.010773       0.000000       0.367352   -9999.000000       0.577500       0.157500   -9999.000000
57662     57662     hunan          111.6800       29.0797          124       167     2012      05        31        152              0.302875      25.135223       2.062344       0.350425   -9999.000000   -9999.000000       0.172900   -9999.000000
57662     57662     hunan          111.6800       29.0797          124       167     2012      06        01        153              0.303875      24.336151       5.077155       0.349358       0.397000       0.191000       0.186000   -9999.000000
57662     57662     hunan          111.6800       29.0797          124       167     2012      06        02        154              0.303000      21.888336       3.220277       0.354177       0.344500       0.466000       0.156200   -9999.000000
57662     57662     hunan          111.6800       29.0797          124       167     2012      06        03        155              0.304042      24.924652      20.276125       0.343668       0.458000   -9999.000000   -9999.000000       0.917000
57662     57662     hunan          111.6800       29.0797          124       167     2012      06        04        156              0.304500      22.193939      24.924852       0.365547   -9999.000000       0.416800   -9999.000000   -9999.000000
57662     57662     hunan          111.6800       29.0797          124       167     2012      06        05        157              0.303958      21.625885       0.627252       0.376496   -9999.000000   -9999.000000       0.155500       0.585000
57662     57662     hunan          111.6800       29.0797          124       167     2012      06        06        158              0.303792      24.364716       7.823189       0.360913       0.493000       0.311400       0.168400   -9999.000000
57662     57662     hunan          111.6800       29.0797          124       167     2012      06        07        159              0.304458      25.532593      21.523552       0.363557       0.455000       0.378100       0.143100       0.960000
57662     57662     hunan          111.6800       29.0797          124       167     2012      06        08        160              0.304000      24.708435       0.000000       0.376098       0.325000   -9999.000000   -9999.000000       0.817000
57662     57662     hunan          111.6800       29.0797          124       167     2012      06        09        161              0.303458      27.521667       2.410581       0.362220       0.278000       0.332200   -9999.000000   -9999.000000
57662     57662     hunan          111.6800       29.0797          124       167     2012      06        10        162              0.304417      29.382721       6.826076       0.356663   -9999.000000       0.359800   -9999.000000       0.809000
57662     57662     hunan          111.6800       29.0797          124       167     2012      06        11        163              0.000000      27.089996       0.000000       0.360934       0.426000   -9999.000000       0.222000   -9999.000000
57662     57662     hunan          111.6800       29.0797          124       167     2012      06        12        164              0.302667      28.057007       0.000000       0.350359       0.326000       0.376500       0.210900       0.468000
57662     57662     hunan          111.6800       29.0797          124       167     2012      06        13        165              0.298458      28.749969       0.000000       0.343493       0.277000   -9999.000000       0.211700       0.496000
57662     57662     hunan          111.6800       29.0797          124       167     2012      06        14        166              0.297000      29.106079       0.109082       0.339394       0.214000       0.352800   -9999.000000   -9999.000000
57662     57662     hunan          111.6800       29.0797          124       167     2012      06        15        167              0.294167      26.818634       0.000000       0.340886   -9999.000000       0.356500   -9999.000000       0.385000
57662     57662     hunan          111.6800       29.0797          124       167     2012      06        16        168              0.291542      27.041382       0.000000       0.335297       0.391000   -9999.000000       0.209300   -9999.000000
57662     57662     hunan          111.6800       29.0797          124       167     2012      06        17        169              0.289417      26.880798       0.000000       0.332128       0.295500       0.332400       0.221200       0.390000
57662     57662     hunan          111.6800       29.0797          124       167     2012      06        18        170              0.287500      27.291382       0.000000       0.328308       0.269000   -9999.000000       0.239300   -9999.000000
57662     57662     hunan          111.6800       29.0797          124       167     2012      06        19        171              0.286542      28.211334       0.000000       0.326311       0.201000       0.252300       0.211500       0.263000
57662     57662     hunan          111.6800       29.0797          124       167     2012      06        20        172              0.286208      29.121155       0.000000       0.323399   -9999.000000       0.461600   -9999.000000       0.394000
57662     57662     hunan          111.6800       29.0797          124       167     2012      06        21        173              0.286000      29.685791       0.000000       0.321549   -9999.000000   -9999.000000   -9999.000000   -9999.000000
57662     57662     hunan          111.6800       29.0797          124       167     2012      06        22        174              0.286000      28.659973       0.000000       0.321706       0.372500       0.468100       0.223700       0.496000
57662     57662     hunan          111.6800       29.0797          124       167     2012      06        23        175              0.285375      29.700684       0.000000       0.316719       0.335500       0.465500       0.215300   -9999.000000
57662     57662     hunan          111.6800       29.0797          124       167     2012      06        24        176              0.285000      29.480713       0.000000       0.312795       0.296500       0.229600       0.193800       0.278000
57662     57662     hunan          111.6800       29.0797          124       167     2012      06        25        177              0.295083      29.588226      28.599285       0.308385       0.291000       0.254800   -9999.000000       0.276000
57662     57662     hunan          111.6800       29.0797          124       167     2012      06        26        178              0.303750      28.305969      43.994686       0.353602   -9999.000000   -9999.000000   -9999.000000   -9999.000000
57662     57662     hunan          111.6800       29.0797          124       167     2012      06        27        179              0.304000      26.931610      17.544216       0.380499       0.499000       0.308700       0.196300       0.990000
57662     57662     hunan          111.6800       29.0797          124       167     2012      06        28        180              0.303250      25.718140       0.203263       0.371468       0.424500       0.485600       0.220800   -9999.000000
57662     57662     hunan          111.6800       29.0797          124       167     2012      06        29        181              0.302542      26.801971       0.000000       0.353370       0.335000   -9999.000000       0.177300       0.768000
57662     57662     hunan          111.6800       29.0797          124       167     2012      06        30        182              0.302000      30.530182       0.518836       0.344050       0.269000       0.302500       0.195700   -9999.000000
57662     57662     hunan          111.6800       29.0797          124       167     2012      07        01        183              0.300458      28.630341       2.398219       0.340606   -9999.000000   -9999.000000   -9999.000000   -9999.000000
57662     57662     hunan          111.6800       29.0797          124       167     2012      07        02        184              0.295542      29.503754       0.000000       0.337591       0.452000       0.216600   -9999.000000       0.358000
57662     57662     hunan          111.6800       29.0797          124       167     2012      07        03        185              0.290750      30.263855       0.000000       0.331642       0.358000       0.203000       0.254900   -9999.000000
57662     57662     hunan          111.6800       29.0797          124       167     2012      07        04        186              0.288458      30.848785       0.000000       0.328442       0.309000   -9999.000000       0.230000       0.304000
57662     57662     hunan          111.6800       29.0797          124       167     2012      07        05        187              0.287208      30.271790       0.000000       0.326778       0.249000       0.180500       0.236500   -9999.000000
57662     57662     hunan          111.6800       29.0797          124       167     2012      07        06        188              0.286333      31.028992       0.000000       0.324291   -9999.000000   -9999.000000       0.281400       0.421000
57662     57662     hunan          111.6800       29.0797          124       167     2012      07        07        189              0.286000      31.732422       0.964109       0.322145   -9999.000000       0.225000   -9999.000000       0.442000
57662     57662     hunan          111.6800       29.0797          124       167     2012      07        08        190              0.285375      31.519196       0.000000       0.320904       0.349500   -9999.000000   -9999.000000   -9999.000000
57662     57662     hunan          111.6800       29.0797          124       167     2012      07        09        191              0.285000      30.923645       0.000000       0.317611       0.316000   -9999.000000       0.148200       0.252000
57662     57662     hunan          111.6800       29.0797          124       167     2012      07        10        192              0.285000      30.852020       0.000000       0.313586       0.307000       0.264400       0.143700   -9999.000000
57662     57662     hunan          111.6800       29.0797          124       167     2012      07        11        193              0.284417      30.522980       0.162092       0.312037   -9999.000000       0.255100       0.141900       0.303000
57662     57662     hunan          111.6800       29.0797          124       167     2012      07        12        194              0.288500      31.631500       6.661350       0.309231   -9999.000000   -9999.000000   -9999.000000       0.277000
57662     57662     hunan          111.6800       29.0797          124       167     2012      07        13        195              0.293261      30.509460      25.994549       0.327046       0.500000       0.283600   -9999.000000   -9999.000000
57662     57662     hunan          111.6800       29.0797          124       167     2012      07        14        196              0.301458      27.550293       0.909479       0.348341       0.405000   -9999.000000       0.155100       0.405000
57662     57662     hunan          111.6800       29.0797          124       167     2012      07        15        197              0.301043      28.049805       2.175565       0.349096       0.359000       0.274100       0.164200   -9999.000000
57662     57662     hunan          111.6800       29.0797          124       167     2012      07        16        198              0.304250      29.101227      86.309387       0.335670   -9999.000000       0.321600       0.365300       0.845000
57662     57662     hunan          111.6800       29.0797          124       167     2012      07        17        199              0.303917      26.551971      16.059713       0.414468   -9999.000000   -9999.000000       0.289600   -9999.000000
57662     57662     hunan          111.6800       29.0797          124       167     2012      07        18        200              0.304792      26.757294       9.746021       0.374548       0.500000       0.363900   -9999.000000       0.854000
57662     57662     hunan          111.6800       29.0797          124       167     2012      07        19        201              0.303333      26.919769       2.057667       0.368972       0.439500   -9999.000000   -9999.000000       0.953000
57662     57662     hunan          111.6800       29.0797          124       167     2012      07        20        202              0.302458      28.313690       1.068465       0.359175       0.370500       0.356500       0.326900   -9999.000000
57662     57662     hunan          111.6800       29.0797          124       167     2012      07        21        203              0.300087      30.569244       0.000000       0.352015       0.348000       0.223000       0.249200       0.576000
57662     57662     hunan          111.6800       29.0797          124       167     2012      07        22        204              0.298833      31.866180      29.072430       0.345517   -9999.000000   -9999.000000       0.270300   -9999.000000
57662     57662     hunan          111.6800       29.0797          124       167     2012      07        23        205              0.305125      31.395966      21.450588       0.358958   -9999.000000       0.452800   -9999.000000       1.000000
57662     57662     hunan          111.6800       29.0797          124       167     2012      07        24        206              0.303250      29.480713       5.115313       0.377514       0.443500   -9999.000000   -9999.000000       0.770000
57662     57662     hunan          111.6800       29.0797          124       167     2012      07        25        207              0.300292      30.150787       0.529132       0.365415       0.399500       0.394300   -9999.000000   -9999.000000
57662     57662     hunan          111.6800       29.0797          124       167     2012      07        26        208              0.294958      31.109619       0.339711       0.356252       0.355000       0.614300       0.295600       0.530000
57662     57662     hunan          111.6800       29.0797          124       167     2012      07        27        209              0.290208      31.463409       0.000000       0.349490       0.280000   -9999.000000       0.303000   -9999.000000
57662     57662     hunan          111.6800       29.0797          124       167     2012      07        28        210              0.287583      31.816010       0.411052       0.343385   -9999.000000       0.432200       0.260100       0.505000
57662     57662     hunan          111.6800       29.0797          124       167     2012      07        29        211              0.285625      31.683197       0.000000       0.339573       0.485000       0.428400   -9999.000000   -9999.000000
57662     57662     hunan          111.6800       29.0797          124       167     2012      07        30        212              0.284333      32.257599       0.000000       0.335950       0.375500       0.333400   -9999.000000   -9999.000000
57662     57662     hunan          111.6800       29.0797          124       167     2012      07        31        213              0.284000      32.746368       5.431861       0.332309       0.357000       0.289700       0.300600       0.440000
57662     57662     hunan          111.6800       29.0797          124       167     2012      08        01        214              0.285833      31.893768       1.702741       0.329262       0.325000   -9999.000000       0.319600   -9999.000000
57662     57662     hunan          111.6800       29.0797          124       167     2012      08        02        215              0.286667      31.370911       0.000000       0.330095   -9999.000000       0.167500       0.337000       0.297000
57662     57662     hunan          111.6800       29.0797          124       167     2012      08        03        216              0.284583      30.129578       0.000000       0.326108       0.473000       0.450300       0.284400   -9999.000000
57662     57662     hunan          111.6800       29.0797          124       167     2012      08        04        217              0.287000      29.992249       8.439375       0.321445       0.445500   -9999.000000   -9999.000000       0.947000
57662     57662     hunan          111.6800       29.0797          124       167     2012      08        05        218              0.298750      27.726898      13.243591       0.337131       0.492000       0.487200   -9999.000000       0.740000
57662     57662     hunan          111.6800       29.0797          124       167     2012      08        06        219              0.301292      28.403137       3.334199       0.355657       0.368000   -9999.000000       0.271700   -9999.000000
57662     57662     hunan          111.6800       29.0797          124       167     2012      08        07        220              0.301375      29.877136       4.178098       0.343051       0.329000       0.350400       0.307100       0.403000
57662     57662     hunan          111.6800       29.0797          124       167     2012      08        08        221              0.299292      30.194092       0.756064       0.336288   -9999.000000       0.261400       0.257900   -9999.000000
57662     57662     hunan          111.6800       29.0797          124       167     2012      08        09        222              0.295458      30.076477       0.000000       0.326688       0.471000   -9999.000000   -9999.000000       0.394000
57662     57662     hunan          111.6800       29.0797          124       167     2012      08        10        223              0.291167      30.341187       0.000000       0.322328       0.378500       0.467700   -9999.000000       0.457000
57662     57662     hunan          111.6800       29.0797          124       167     2012      08        11        224              0.287667      30.788300       0.000000       0.317925       0.350500   -9999.000000   -9999.000000   -9999.000000
57662     57662     hunan          111.6800       29.0797          124       167     2012      08        12        225              0.286167      31.207977       0.000000       0.314674       0.288000       0.261000       0.258800       0.234000
57662     57662     hunan          111.6800       29.0797          124       167     2012      08        13        226              0.289375      30.854492       0.736812       0.314208   -9999.000000       0.257700       0.371400   -9999.000000
57662     57662     hunan          111.6800       29.0797          124       167     2012      08        14        227              0.291375      30.671143       0.000000       0.313674       0.494000   -9999.000000       0.313500       0.411000
57662     57662     hunan          111.6800       29.0797          124       167     2012      08        15        228              0.287708      29.791229       0.000000       0.312762       0.401000       0.287900   -9999.000000   -9999.000000
57662     57662     hunan          111.6800       29.0797          124       167     2012      08        16        229              0.285292      30.386108       0.117285       0.310972       0.375500       0.178600   -9999.000000       0.346000
57662     57662     hunan          111.6800       29.0797          124       167     2012      08        17        230              0.289208      30.551605       1.160431       0.308170       0.343500       0.218400       0.304300       0.517000
57662     57662     hunan          111.6800       29.0797          124       167     2012      08        18        231              0.290208      30.618408       0.000000       0.310482   -9999.000000       0.295800       0.328100   -9999.000000
57662     57662     hunan          111.6800       29.0797          124       167     2012      08        19        232              0.285875      32.332947       0.000000       0.305252   -9999.000000   -9999.000000       0.294900       0.387000
57662     57662     hunan          111.6800       29.0797          124       167     2012      08        20        233              0.284375      32.615021       7.680152       0.301413       0.417000       0.186800       0.209600   -9999.000000
57662     57662     hunan          111.6800       29.0797          124       167     2012      08        21        234              0.302167      31.691620      43.623497       0.309152       0.391000       0.259000   -9999.000000       1.000000
57662     57662     hunan          111.6800       29.0797          124       167     2012      08        22        235              0.301375      25.154480       0.000000       0.374259       0.333500   -9999.000000   -9999.000000   -9999.000000
57662     57662     hunan          111.6800       29.0797          124       167     2012      08        23        236              0.299542      24.793945       3.652016       0.340151       0.280000       0.269900       0.245800   -9999.000000
57662     57662     hunan          111.6800       29.0797          124       167     2012      08        24        237              0.296375      23.983917       0.000000       0.331421   -9999.000000   -9999.000000       0.228200       0.448000
57662     57662     hunan          111.6800       29.0797          124       167     2012      08        25        238              0.000000      26.386841       0.000000       0.324222       0.457000       0.268100       0.227200   -9999.000000
57662     57662     hunan          111.6800       29.0797          124       167     2012      08        26        239              0.291333      27.282928       0.309907       0.320287       0.357500       0.210200   -9999.000000       0.480000
57662     57662     hunan          111.6800       29.0797          124       167     2012      08        27        240              0.289708      26.857086       0.000000       0.318419       0.338000   -9999.000000   -9999.000000   -9999.000000
57662     57662     hunan          111.6800       29.0797          124       167     2012      08        28        241              0.288500      27.666595       0.000000       0.314096       0.249000       0.222200       0.199000   -9999.000000
57662     57662     hunan          111.6800       29.0797          124       167     2012      08        29        242              0.286708      28.933472       0.000000       0.311499   -9999.000000   -9999.000000       0.224000       0.364000
57662     57662     hunan          111.6800       29.0797          124       167     2012      08        30        243              0.285375      30.138275       0.000000       0.307888   -9999.000000       0.263500       0.202300   -9999.000000
57662     57662     hunan          111.6800       29.0797          124       167     2012      08        31        244              0.285000      30.036926       0.126592       0.305744       0.390500       0.187400       0.205200       0.200000
57662     57662     hunan          111.6800       29.0797          124       167     2012      09        01        245              0.284375      30.458710       0.000000       0.305340       0.334500   -9999.000000   -9999.000000   -9999.000000
57662     57662     hunan          111.6800       29.0797          124       167     2012      09        02        246              0.301333      31.417664      28.510735       0.302204       0.357500       0.259000   -9999.000000       0.570000
57662     57662     hunan          111.6800       29.0797          124       167     2012      09        03        247              0.303375      25.282654       0.576795       0.359631       0.255000       0.207600       0.196400       0.848000
57662     57662     hunan          111.6800       29.0797          124       167     2012      09        04        248              0.301667      25.720581       0.000000       0.339613   -9999.000000       0.246600       0.204900   -9999.000000
57662     57662     hunan          111.6800       29.0797          124       167     2012      09        05        249              0.299000      26.739655       0.074710       0.327336       0.441000       0.169900       0.182600       0.349000
57662     57662     hunan          111.6800       29.0797          124       167     2012      09        06        250              0.296042      26.768707       0.000000       0.321339       0.341000   -9999.000000       0.201100   -9999.000000
57662     57662     hunan          111.6800       29.0797          124       167     2012      09        07        251              0.293167      27.832397       0.000000       0.316433       0.332000   -9999.000000   -9999.000000       0.486000
57662     57662     hunan          111.6800       29.0797          124       167     2012      09        08        252              0.291333      30.069489       8.715454       0.312652       0.263000       0.380600   -9999.000000       0.467000
57662     57662     hunan          111.6800       29.0797          124       167     2012      09        09        253              0.297458      28.334991       1.309526       0.319959   -9999.000000       0.187900       0.227100   -9999.000000
57662     57662     hunan          111.6800       29.0797          124       167     2012      09        10        254              0.300792      25.152374       3.111985       0.331320       0.496000       0.434100       0.270200       0.385000
57662     57662     hunan          111.6800       29.0797          124       167     2012      09        11        255              0.299583      25.898224       7.292234       0.330391       0.362000   -9999.000000       0.213700   -9999.000000
57662     57662     hunan          111.6800       29.0797          124       167     2012      09        12        256              0.302708      27.059265       5.139306       0.330167       0.374500       0.309100   -9999.000000       0.810000
57662     57662     hunan          111.6800       29.0797          124       167     2012      09        13        257              0.302333      22.005280       0.219722       0.339704       0.238000       0.422900   -9999.000000   -9999.000000
57662     57662     hunan          111.6800       29.0797          124       167     2012      09        14        258              0.300458      21.179871       0.000000       0.332211   -9999.000000   -9999.000000       0.225500       0.275000
57662     57662     hunan          111.6800       29.0797          124       167     2012      09        15        259              0.296875      23.103699       0.590405       0.322095   -9999.000000       0.278700       0.205400       0.583000
57662     57662     hunan          111.6800       29.0797          124       167     2012      09        16        260              0.294542      23.093506       0.000000       0.317239       0.407000   -9999.000000       0.266700   -9999.000000
57662     57662     hunan          111.6800       29.0797          124       167     2012      09        17        261              0.292708      22.287537       0.000000       0.316048       0.317000       0.281900       0.206500       0.444000
57662     57662     hunan          111.6800       29.0797          124       167     2012      09        18        262              0.291333      23.503845       0.000000       0.312750       0.300500       0.201200   -9999.000000   -9999.000000
57662     57662     hunan          111.6800       29.0797          124       167     2012      09        19        263              0.290125      24.814880       2.197720       0.309646       0.235000   -9999.000000   -9999.000000       0.424000
57662     57662     hunan          111.6800       29.0797          124       167     2012      09        20        264              0.292083      25.757843      15.292656       0.306992   -9999.000000       0.209800       0.271800       0.430000
57662     57662     hunan          111.6800       29.0797          124       167     2012      09        21        265              0.303625      25.779510      17.956497       0.324924   -9999.000000       0.235600       0.223200   -9999.000000
57662     57662     hunan          111.6800       29.0797          124       167     2012      09        22        266              0.302417      22.286957       0.441951       0.361942       0.311500       0.209600       0.230100       0.597000
57662     57662     hunan          111.6800       29.0797          124       167     2012      09        23        267              0.303000      25.092499       2.059690       0.338863       0.300500       0.304100   -9999.000000   -9999.000000
57662     57662     hunan          111.6800       29.0797          124       167     2012      09        24        268              0.303250      24.351929       1.187322       0.335672       0.246000   -9999.000000   -9999.000000       0.645000
57662     57662     hunan          111.6800       29.0797          124       167     2012      09        25        269              0.303000      24.160828       0.000000       0.332559   -9999.000000       0.310300   -9999.000000   -9999.000000
57662     57662     hunan          111.6800       29.0797          124       167     2012      09        26        270              0.302208      24.361176       0.000000       0.327162   -9999.000000       0.328700       0.261400   -9999.000000
57662     57662     hunan          111.6800       29.0797          124       167     2012      09        27        271              0.301286      24.233398       0.226082       0.323275       0.323000       0.226100       0.237400       0.521000
57662     57662     hunan          111.6800       29.0797          124       167     2012      09        28        272              0.296200      24.675232       0.000000       0.318737       0.279000   -9999.000000       0.248700   -9999.000000
57662     57662     hunan          111.6800       29.0797          124       167     2012      09        29        273              0.293875      22.248260       0.000000       0.312323       0.244000   -9999.000000   -9999.000000       0.185000
57662     57662     hunan          111.6800       29.0797          124       167     2012      09        30        274              0.292292      21.784668       0.000000       0.310458       0.215000       0.250700   -9999.000000   -9999.000000
57662     57662     hunan          111.6800       29.0797          124       167     2012      10        01        275              0.291292      21.414154       0.000000       0.310393   -9999.000000       0.072300       0.125800       0.365000
57662     57662     hunan          111.6800       29.0797          124       167     2012      10        02        276              0.290292      22.481598       0.322537       0.308684       0.294000   -9999.000000       0.168100       0.416000
57662     57662     hunan          111.6800       29.0797          124       167     2012      10        03        277              0.290500      22.868866       0.842837       0.306925       0.266000       0.387400       0.167500   -9999.000000
57662     57662     hunan          111.6800       29.0797          124       167     2012      10        04        278              0.292958      20.568817       4.582067       0.312262       0.276000   -9999.000000       0.142800       0.543000
57662     57662     hunan          111.6800       29.0797          124       167     2012      10        05        279              0.301042      19.390533       5.256138       0.322794       0.238000       0.433700   -9999.000000   -9999.000000
57662     57662     hunan          111.6800       29.0797          124       167     2012      10        06        280              0.301333      18.622559       0.000000       0.335795   -9999.000000       0.455400   -9999.000000       0.445000
57662     57662     hunan          111.6800       29.0797          124       167     2012      10        07        281              0.300792      21.092194       1.724408       0.325611       0.353000   -9999.000000       0.179400       0.444000
57662     57662     hunan          111.6800       29.0797          124       167     2012      10        08        282              0.302958      19.462128       4.928622       0.324993       0.308500       0.311500       0.156200   -9999.000000
57662     57662     hunan          111.6800       29.0797          124       167     2012      10        09        283              0.302208      19.243103       0.252666       0.336439       0.244000   -9999.000000       0.135300       0.490000
57662     57662     hunan          111.6800       29.0797          124       167     2012      10        10        284              0.301000      21.627838       0.000000       0.326916       0.211500       0.263700   -9999.000000   -9999.000000
57662     57662     hunan          111.6800       29.0797          124       167     2012      10        11        285              0.300000      21.643494       0.000000       0.319894   -9999.000000       0.349600   -9999.000000       0.478000
57662     57662     hunan          111.6800       29.0797          124       167     2012      10        12        286              0.299375      20.538727       0.419921       0.318737   -9999.000000   -9999.000000   -9999.000000   -9999.000000
57662     57662     hunan          111.6800       29.0797          124       167     2012      10        13        287              0.302500      19.491974       3.548405       0.318757       0.236000       0.312100       0.140000       0.512000
57662     57662     hunan          111.6800       29.0797          124       167     2012      10        14        288              0.303042      18.044617       5.776553       0.328641       0.219000       0.311500       0.129800       0.474000
57662     57662     hunan          111.6800       29.0797          124       167     2012      10        15        289              0.303042      19.198059       0.211440       0.333740       0.193000       0.163700       0.196800   -9999.000000
57662     57662     hunan          111.6800       29.0797          124       167     2012      10        16        290              0.303500      19.140289       9.822969       0.330611       0.193000   -9999.000000   -9999.000000       0.887000
57662     57662     hunan          111.6800       29.0797          124       167     2012      10        17        291              0.302375      17.814545       0.000000       0.347257   -9999.000000   -9999.000000   -9999.000000   -9999.000000
57662     57662     hunan          111.6800       29.0797          124       167     2012      10        18        292              0.301375      18.397827       0.000000       0.329197       0.246000       0.148800       0.189800       0.349000
57662     57662     hunan          111.6800       29.0797          124       167     2012      10        19        293              0.300292      19.181915       0.554185       0.323291       0.200500   -9999.000000       0.189300       0.465000
57662     57662     hunan          111.6800       29.0797          124       167     2012      10        20        294              0.302958      20.576904      17.689783       0.322337       0.227000   -9999.000000       0.207200   -9999.000000
57662     57662     hunan          111.6800       29.0797          124       167     2012      10        21        295              0.303083      20.166260       8.062515       0.350887       0.188000       0.387900       0.185100       0.549000
57662     57662     hunan          111.6800       29.0797          124       167     2012      10        22        296              0.303292      21.972900       3.070564       0.342419   -9999.000000   -9999.000000   -9999.000000   -9999.000000
57662     57662     hunan          111.6800       29.0797          124       167     2012      10        23        297              0.302708      17.180756       2.042897       0.346152   -9999.000000       0.255100   -9999.000000       0.560000
57662     57662     hunan          111.6800       29.0797          124       167     2012      10        24        298              0.303625      18.478729       7.497528       0.335539   -9999.000000       0.412400       0.203300   -9999.000000
57662     57662     hunan          111.6800       29.0797          124       167     2012      10        25        299              0.000000      15.436371      16.131546       0.343262       0.245000   -9999.000000       0.185600   -9999.000000
57662     57662     hunan          111.6800       29.0797          124       167     2012      10        26        300              0.303000      15.352600       0.401298       0.361778       0.244000       0.358900       0.183600       0.697000
57662     57662     hunan          111.6800       29.0797          124       167     2012      10        27        301              0.303000      16.443237       0.000000       0.342286       0.195000   -9999.000000   -9999.000000   -9999.000000
57662     57662     hunan          111.6800       29.0797          124       167     2012      10        28        302              0.000000      19.251740      11.182675       0.334560   -9999.000000       0.233100   -9999.000000       0.406000
57662     57662     hunan          111.6800       29.0797          124       167     2012      10        29        303              0.304750      20.413330      21.953016       0.341915   -9999.000000       0.419900       0.178100   -9999.000000
57662     57662     hunan          111.6800       29.0797          124       167     2012      10        30        304              0.304000      17.420349       0.058346       0.369760       0.226000   -9999.000000       0.174600       0.694000
57662     57662     hunan          111.6800       29.0797          124       167     2012      10        31        305              0.303500      16.807953       0.186430       0.346182       0.187000       0.353700       0.168400       0.666000
57662     57662     hunan          111.6800       29.0797          124       167     2012      11        01        306              0.303000      17.114838       0.382608       0.338561       0.152000       0.518500       0.169000   -9999.000000
57662     57662     hunan          111.6800       29.0797          124       167     2012      11        02        307              0.302375      16.361359       0.248141       0.336161   -9999.000000       0.167500   -9999.000000       0.367000
57662     57662     hunan          111.6800       29.0797          124       167     2012      11        03        308              0.304042      17.428253       6.357306       0.334211   -9999.000000       0.375400   -9999.000000   -9999.000000
57662     57662     hunan          111.6800       29.0797          124       167     2012      11        04        309              0.303833      13.613953       0.000000       0.347391       0.187000   -9999.000000       0.180300       0.535000
57662     57662     hunan          111.6800       29.0797          124       167     2012      11        05        310              0.303417      14.192200       2.026340       0.337423       0.194000       0.261300       0.179700       0.425000
57662     57662     hunan          111.6800       29.0797          124       167     2012      11        06        311              0.304000      13.467590       0.239746       0.339066       0.164000       0.736600       0.165600   -9999.000000
57662     57662     hunan          111.6800       29.0797          124       167     2012      11        07        312              0.304375      14.476410       8.329767       0.336587   -9999.000000   -9999.000000       0.199800       0.620000
57662     57662     hunan          111.6800       29.0797          124       167     2012      11        08        313              0.304522      13.024414       3.656814       0.345435   -9999.000000       0.373600   -9999.000000   -9999.000000
57662     57662     hunan          111.6800       29.0797          124       167     2012      11        09        314              0.305000      13.512360      17.035904       0.347555   -9999.000000   -9999.000000   -9999.000000       1.000000
57662     57662     hunan          111.6800       29.0797          124       167     2012      11        10        315              0.304625      11.914642       0.183472       0.358600   -9999.000000       0.505000       0.170200   -9999.000000
57662     57662     hunan          111.6800       29.0797          124       167     2012      11        11        316              0.304042      12.938263       0.000000       0.352773       0.167000       0.292000       0.187500       0.603000
57662     57662     hunan          111.6800       29.0797          124       167     2012      11        12        317              0.304000      13.076843       2.143724       0.342648   -9999.000000   -9999.000000       0.175500       0.656000
57662     57662     hunan          111.6800       29.0797          124       167     2012      11        13        318              0.000000      12.251129       0.066325       0.341328   -9999.000000       0.230400   -9999.000000   -9999.000000
57662     57662     hunan          111.6800       29.0797          124       167     2012      11        14        319              0.303913      15.584991      14.753838       0.339331   -9999.000000   -9999.000000   -9999.000000       0.547000
57662     57662     hunan          111.6800       29.0797          124       167     2012      11        15        320              0.305350      13.785492      42.840157       0.349440   -9999.000000       0.410600       0.175900   -9999.000000
57662     57662     hunan          111.6800       29.0797          124       167     2012      11        16        321              0.304727       9.952271       3.892637       0.385530   -9999.000000       0.534000       0.185200       0.839000
57662     57662     hunan          111.6800       29.0797          124       167     2012      11        17        322              0.000000       9.163239       0.000000       0.371381   -9999.000000   -9999.000000       0.200400       0.834000
57662     57662     hunan          111.6800       29.0797          124       167     2012      11        18        323              0.304000      12.585114       0.000000       0.362439   -9999.000000       0.335600       0.189400   -9999.000000
57662     57662     hunan          111.6800       29.0797          124       167     2012      11        19        324              0.304000      13.448242       0.000000       0.357804   -9999.000000       0.340500   -9999.000000       0.843000
57662     57662     hunan          111.6800       29.0797          124       167     2012      11        20        325              0.304708      12.244873       9.068124       0.354975       0.251000       0.346500   -9999.000000   -9999.000000
57662     57662     hunan          111.6800       29.0797          124       167     2012      11        21        326              0.305000      11.493805       5.216000       0.360252   -9999.000000       0.356300       0.149700       0.632000
57662     57662     hunan          111.6800       29.0797          124       167     2012      11        22        327              0.305292      11.032379       7.087838       0.359952   -9999.000000   -9999.000000       0.125800   -9999.000000
57662     57662     hunan          111.6800       29.0797          124       167     2012      11        23        328              0.304375      10.097717       0.000000       0.363347   -9999.000000       0.638500       0.134700   -9999.000000
57662     57662     hunan          111.6800       29.0797          124       167     2012      11        24        329              0.304292       8.735992       5.364728       0.354779   -9999.000000       0.406500   -9999.000000       0.756000
57662     57662     hunan          111.6800       29.0797          124       167     2012      11        25        330              0.305000       8.058167       1.018203       0.356384   -9999.000000   -9999.000000   -9999.000000   -9999.000000
57662     57662     hunan          111.6800       29.0797          124       167     2012      11        26        331              0.304583       7.817902       0.000000       0.355660   -9999.000000       0.444700   -9999.000000       0.574000
57662     57662     hunan          111.6800       29.0797          124       167     2012      11        27        332              0.304083       9.762054       0.619179       0.349851   -9999.000000   -9999.000000       0.147100   -9999.000000
57662     57662     hunan          111.6800       29.0797          124       167     2012      11        28        333              0.304167       8.538757       0.294855       0.348480   -9999.000000       0.294600       0.131400       0.443000
57662     57662     hunan          111.6800       29.0797          124       167     2012      11        29        334              0.304000      10.859100       0.530848       0.347129   -9999.000000       0.388000       0.148200       0.487000
57662     57662     hunan          111.6800       29.0797          124       167     2012      11        30        335              0.304174       8.520508       5.952599       0.347034       0.343000   -9999.000000   -9999.000000   -9999.000000
57662     57662     hunan          111.6800       29.0797          124       167     2012      12        01        336              0.305000       8.159851       1.157266       0.351103   -9999.000000       0.168500   -9999.000000       0.454000
57662     57662     hunan          111.6800       29.0797          124       167     2012      12        02        337              0.304625       6.438782       0.000000       0.352578   -9999.000000   -9999.000000       0.149400   -9999.000000
57662     57662     hunan          111.6800       29.0797          124       167     2012      12        03        338              0.304250       8.682739       0.000000       0.346674   -9999.000000   -9999.000000       0.140400       0.402000
57662     57662     hunan          111.6800       29.0797          124       167     2012      12        04        339              0.304000       9.196533       0.000000       0.344589   -9999.000000       0.345800       0.138100       0.628000
57662     57662     hunan          111.6800       29.0797          124       167     2012      12        05        340              0.304000       8.648834       0.000000       0.344181   -9999.000000   -9999.000000       0.129100   -9999.000000
57662     57662     hunan          111.6800       29.0797          124       167     2012      12        06        341              0.304000       9.498505       0.000000       0.342700   -9999.000000       0.401100   -9999.000000       0.275000
57662     57662     hunan          111.6800       29.0797          124       167     2012      12        07        342              0.303708      10.322418       0.000000       0.341700   -9999.000000       0.310000   -9999.000000   -9999.000000
57662     57662     hunan          111.6800       29.0797          124       167     2012      12        08        343              0.303417       9.610138       0.000000       0.341552   -9999.000000       0.192200       0.141200       0.369000
57662     57662     hunan          111.6800       29.0797          124       167     2012      12        09        344              0.303000      10.153473       0.117679       0.340035   -9999.000000       0.353800       0.136000   -9999.000000
57662     57662     hunan          111.6800       29.0797          124       167     2012      12        10        345              0.303792       7.158936       1.975056       0.339264   -9999.000000   -9999.000000       0.110300       0.788000
57662     57662     hunan          111.6800       29.0797          124       167     2012      12        11        346              0.304000       6.023773       0.000000       0.342667   -9999.000000       0.358400   -9999.000000       0.518000
57662     57662     hunan          111.6800       29.0797          124       167     2012      12        12        347              0.304167       6.150452       2.539988       0.340022   -9999.000000       0.363000   -9999.000000   -9999.000000
57662     57662     hunan          111.6800       29.0797          124       167     2012      12        13        348              0.305000       6.560638       2.999489       0.341955   -9999.000000   -9999.000000       0.113800       0.628000
57662     57662     hunan          111.6800       29.0797          124       167     2012      12        14        349              0.305000       6.253876       8.432802       0.346664   -9999.000000       0.233300       0.119200   -9999.000000
57662     57662     hunan          111.6800       29.0797          124       167     2012      12        15        350              0.000000       5.117249       1.360809       0.351887   -9999.000000   -9999.000000       0.117100       0.952000
57662     57662     hunan          111.6800       29.0797          124       167     2012      12        16        351              0.305000       5.970978       0.430260       0.346701   -9999.000000       0.335900       0.115700       0.535000
57662     57662     hunan          111.6800       29.0797          124       167     2012      12        17        352              0.305292       6.120056      21.528603       0.343589   -9999.000000       0.324600   -9999.000000   -9999.000000
57662     57662     hunan          111.6800       29.0797          124       167     2012      12        18        353              0.305000       5.046448       0.000000       0.368591   -9999.000000   -9999.000000   -9999.000000       0.764000
57662     57662     hunan          111.6800       29.0797          124       167     2012      12        19        354              0.305000       4.239471       1.238021       0.350159   -9999.000000       0.337400       0.150200   -9999.000000
57662     57662     hunan          111.6800       29.0797          124       167     2012      12        20        355              0.000000       3.452148       4.124244       0.348643   -9999.000000   -9999.000000       0.121900       0.630000
57662     57662     hunan          111.6800       29.0797          124       167     2012      12        21        356              0.305000       2.874847       0.412321       0.351464   -9999.000000       0.422100       0.149000   -9999.000000
57662     57662     hunan          111.6800       29.0797          124       167     2012      12        22        357              0.304458       3.244049       0.213224       0.347800   -9999.000000       0.533400       0.128800   -9999.000000
57662     57662     hunan          111.6800       29.0797          124       167     2012      12        23        358              0.304000       4.520203       0.247086       0.345455   -9999.000000   -9999.000000   -9999.000000       0.570000
57662     57662     hunan          111.6800       29.0797          124       167     2012      12        24        359              0.304000       4.221710       0.000000       0.343100   -9999.000000       0.565800   -9999.000000   -9999.000000
57662     57662     hunan          111.6800       29.0797          124       167     2012      12        25        360              0.304000       6.232483       0.000000       0.343174   -9999.000000       0.239700       0.143100       0.576000
57662     57662     hunan          111.6800       29.0797          124       167     2012      12        26        361              0.000000       2.842590       0.185218       0.336405   -9999.000000   -9999.000000       0.179900   -9999.000000
57662     57662     hunan          111.6800       29.0797          124       167     2012      12        27        362              0.305000       1.130310       2.749270       0.318048   -9999.000000   -9999.000000       0.147200       0.325000
57662     57662     hunan          111.6800       29.0797          124       167     2012      12        28        363              0.305000       0.842590      16.255402       0.310265   -9999.000000   -9999.000000   -9999.000000       0.359000
57662     57662     hunan          111.6800       29.0797          124       167     2012      12        29        364              0.000000       0.962006      10.295545       0.323775   -9999.000000   -9999.000000   -9999.000000   -9999.000000
57662     57662     hunan          111.6800       29.0797          124       167     2012      12        30        365              0.000000       1.452911       2.100956       0.359128   -9999.000000       0.270500       0.119300       0.181000
57662     57662     hunan          111.6800       29.0797          124       167     2012      12        31        366              0.304000       2.012848       1.347759       0.350547   -9999.000000   -9999.000000       0.188700   -9999.000000
