# Supplementary material for: Research on Fusing Multisatellite Soil Moisture Data Based on Bayesian Model Averaging
Source: Hindawi journal article supplement (doi:10.1155/2018/9310838), 2018-06-25
Supplement: f1 [file 9310838.f1.zip › 2012_sm00-10cm_daily_ZDB_ZHY_57680_366days_allin.txt]

57680     57680     hunan          113.0697       28.7997          125       172     2012      01        01        001              0.000000   -9999.000000       0.219526   -9999.000000   -9999.000000   -9999.000000       0.128300   -9999.000000
57680     57680     hunan          113.0697       28.7997          125       172     2012      01        02        002              0.000000       5.071014       0.324956       0.407073   -9999.000000       0.320900   -9999.000000       0.393000
57680     57680     hunan          113.0697       28.7997          125       172     2012      01        03        003              0.000000       4.512665       0.340829       0.407801   -9999.000000   -9999.000000   -9999.000000       0.257000
57680     57680     hunan          113.0697       28.7997          125       172     2012      01        04        004              0.000000       2.742432       0.000000       0.399163   -9999.000000       0.407200   -9999.000000   -9999.000000
57680     57680     hunan          113.0697       28.7997          125       172     2012      01        05        005              0.000000       4.144867       0.000000       0.400039   -9999.000000       0.266400       0.117300       0.331000
57680     57680     hunan          113.0697       28.7997          125       172     2012      01        06        006              0.000000       2.875488       0.000000       0.397223   -9999.000000   -9999.000000       0.124000   -9999.000000
57680     57680     hunan          113.0697       28.7997          125       172     2012      01        07        007              0.000000       4.953888       0.000000       0.398371   -9999.000000       0.250800       0.132700       0.305000
57680     57680     hunan          113.0697       28.7997          125       172     2012      01        08        008              0.000000       3.227814       0.000000       0.397688   -9999.000000       0.192100   -9999.000000       0.430000
57680     57680     hunan          113.0697       28.7997          125       172     2012      01        09        009              0.000000       3.081299       2.892735       0.397249   -9999.000000   -9999.000000   -9999.000000   -9999.000000
57680     57680     hunan          113.0697       28.7997          125       172     2012      01        10        010              0.000000       3.801331       0.000000       0.396773   -9999.000000       0.266300       0.106700       0.358000
57680     57680     hunan          113.0697       28.7997          125       172     2012      01        11        011              0.000000       3.895142       0.000000       0.396029   -9999.000000   -9999.000000       0.104100   -9999.000000
57680     57680     hunan          113.0697       28.7997          125       172     2012      01        12        012              0.000000       4.353485       0.000000       0.395021   -9999.000000       0.332100       0.109100       0.403000
57680     57680     hunan          113.0697       28.7997          125       172     2012      01        13        013              0.000000       4.089325       2.114494       0.394397   -9999.000000       0.360100       0.100500   -9999.000000
57680     57680     hunan          113.0697       28.7997          125       172     2012      01        14        014              0.000000       3.896027      15.451361       0.395843   -9999.000000   -9999.000000   -9999.000000   -9999.000000
57680     57680     hunan          113.0697       28.7997          125       172     2012      01        15        015              0.000000       3.525848       1.426635       0.407483   -9999.000000       0.392600   -9999.000000       0.317000
57680     57680     hunan          113.0697       28.7997          125       172     2012      01        16        016              0.000000       1.653351       1.233224       0.398184   -9999.000000   -9999.000000       0.117300   -9999.000000
57680     57680     hunan          113.0697       28.7997          125       172     2012      01        17        017              0.000000       2.645111       6.005258       0.397155   -9999.000000       0.258200       0.119900       1.000000
57680     57680     hunan          113.0697       28.7997          125       172     2012      01        18        018              0.000000       4.000916       3.452333       0.402371   -9999.000000       0.335300       0.136600   -9999.000000
57680     57680     hunan          113.0697       28.7997          125       172     2012      01        19        019              0.000000       4.895599       1.540256       0.403562   -9999.000000   -9999.000000   -9999.000000       0.724000
57680     57680     hunan          113.0697       28.7997          125       172     2012      01        20        020              0.000000       4.122314       2.124374       0.402944   -9999.000000       0.364000   -9999.000000       1.000000
57680     57680     hunan          113.0697       28.7997          125       172     2012      01        21        021              0.000000       4.207458       2.817960       0.401751   -9999.000000       0.268800   -9999.000000   -9999.000000
57680     57680     hunan          113.0697       28.7997          125       172     2012      01        22        022              0.000000       2.040710       0.721631       0.393036   -9999.000000   -9999.000000       0.103500       0.431000
57680     57680     hunan          113.0697       28.7997          125       172     2012      01        23        023              0.000000       1.169037       1.427299       0.368062   -9999.000000       0.428000       0.140400   -9999.000000
57680     57680     hunan          113.0697       28.7997          125       172     2012      01        24        024              0.000000       2.447662       0.000000       0.384356   -9999.000000   -9999.000000   -9999.000000       0.101000
57680     57680     hunan          113.0697       28.7997          125       172     2012      01        25        025              0.000000       2.353516       0.821141       0.376422   -9999.000000   -9999.000000   -9999.000000       0.531000
57680     57680     hunan          113.0697       28.7997          125       172     2012      01        26        026              0.000000       3.889984       0.000000       0.386295   -9999.000000   -9999.000000   -9999.000000   -9999.000000
57680     57680     hunan          113.0697       28.7997          125       172     2012      01        27        027              0.000000       4.901733       0.000000       0.393966   -9999.000000   -9999.000000       0.135700       0.112000
57680     57680     hunan          113.0697       28.7997          125       172     2012      01        28        028              0.000000       3.494568       0.000000       0.395238   -9999.000000       0.277300       0.116200   -9999.000000
57680     57680     hunan          113.0697       28.7997          125       172     2012      01        29        029              0.000000       4.015991       0.000000       0.393889   -9999.000000   -9999.000000       0.105000       0.409000
57680     57680     hunan          113.0697       28.7997          125       172     2012      01        30        030              0.000000       4.744141       0.000000       0.393656   -9999.000000       0.222900       0.125200   -9999.000000
57680     57680     hunan          113.0697       28.7997          125       172     2012      01        31        031              0.000000       3.975861       0.000000       0.390873   -9999.000000       0.390800   -9999.000000       0.329000
57680     57680     hunan          113.0697       28.7997          125       172     2012      02        01        032              0.000000       6.747131       0.726085       0.390742   -9999.000000   -9999.000000   -9999.000000       0.307000
57680     57680     hunan          113.0697       28.7997          125       172     2012      02        02        033              0.000000       7.139984       0.000000       0.389880   -9999.000000       0.265000       0.111900   -9999.000000
57680     57680     hunan          113.0697       28.7997          125       172     2012      02        03        034              0.000000       2.776581       0.671230       0.387850   -9999.000000   -9999.000000       0.121200       0.579000
57680     57680     hunan          113.0697       28.7997          125       172     2012      02        04        035              0.000000       6.362213       0.175527       0.388029   -9999.000000       0.235700       0.108100   -9999.000000
57680     57680     hunan          113.0697       28.7997          125       172     2012      02        05        036              0.000000       4.883911      14.856059       0.388840   -9999.000000       0.210300   -9999.000000       1.000000
57680     57680     hunan          113.0697       28.7997          125       172     2012      02        06        037              0.000000       4.774017       2.588158       0.403089   -9999.000000   -9999.000000   -9999.000000       0.801000
57680     57680     hunan          113.0697       28.7997          125       172     2012      02        07        038              0.000000       5.395386       0.000000       0.401682   -9999.000000       0.333400   -9999.000000   -9999.000000
57680     57680     hunan          113.0697       28.7997          125       172     2012      02        08        039              0.000000       4.812378       0.000000       0.392373   -9999.000000   -9999.000000       0.134700       0.699000
57680     57680     hunan          113.0697       28.7997          125       172     2012      02        09        040              0.000000       4.002930       0.000000       0.390886   -9999.000000       0.175000       0.117400   -9999.000000
57680     57680     hunan          113.0697       28.7997          125       172     2012      02        10        041              0.000000       3.088348       0.000000       0.388235   -9999.000000       0.255200       0.120700       0.318000
57680     57680     hunan          113.0697       28.7997          125       172     2012      02        11        042              0.000000       4.231415       0.197567       0.387881   -9999.000000   -9999.000000   -9999.000000   -9999.000000
57680     57680     hunan          113.0697       28.7997          125       172     2012      02        12        043              0.000000       5.030426       2.466704       0.389656   -9999.000000       0.261700   -9999.000000   -9999.000000
57680     57680     hunan          113.0697       28.7997          125       172     2012      02        13        044              0.000000       4.524567       2.158994       0.392994   -9999.000000   -9999.000000   -9999.000000       1.000000
57680     57680     hunan          113.0697       28.7997          125       172     2012      02        14        045              0.000000       4.778015       3.566503       0.394146   -9999.000000   -9999.000000       0.139500   -9999.000000
57680     57680     hunan          113.0697       28.7997          125       172     2012      02        15        046              0.000000       4.200287       1.439775       0.396713   -9999.000000       0.267000       0.140500       0.852000
57680     57680     hunan          113.0697       28.7997          125       172     2012      02        16        047              0.000000       4.465302       0.667443       0.395140   -9999.000000   -9999.000000       0.144400   -9999.000000
57680     57680     hunan          113.0697       28.7997          125       172     2012      02        17        048              0.000000       4.059784       0.000000       0.392705   -9999.000000       0.284600   -9999.000000       0.513000
57680     57680     hunan          113.0697       28.7997          125       172     2012      02        18        049              0.000000       6.723358       0.000000       0.390417   -9999.000000   -9999.000000   -9999.000000       0.603000
57680     57680     hunan          113.0697       28.7997          125       172     2012      02        19        050              0.000000       6.058014       0.226728       0.389523   -9999.000000   -9999.000000       0.139500   -9999.000000
57680     57680     hunan          113.0697       28.7997          125       172     2012      02        20        051              0.000000       8.790131       0.064193       0.387627   -9999.000000       0.271400       0.109000       0.557000
57680     57680     hunan          113.0697       28.7997          125       172     2012      02        21        052              0.000000       7.059937      11.702507       0.388530   -9999.000000   -9999.000000   -9999.000000   -9999.000000
57680     57680     hunan          113.0697       28.7997          125       172     2012      02        22        053              0.000000       7.541687       6.504899       0.402486   -9999.000000   -9999.000000   -9999.000000       0.932000
57680     57680     hunan          113.0697       28.7997          125       172     2012      02        23        054              0.000000       8.018280       9.203623       0.403586   -9999.000000       0.270600   -9999.000000       0.979000
57680     57680     hunan          113.0697       28.7997          125       172     2012      02        24        055              0.000000       7.652496       0.124191       0.406507   -9999.000000   -9999.000000   -9999.000000   -9999.000000
57680     57680     hunan          113.0697       28.7997          125       172     2012      02        25        056              0.000000       5.555969       1.725296       0.398444   -9999.000000       0.471600       0.127900       0.693000
57680     57680     hunan          113.0697       28.7997          125       172     2012      02        26        057              0.000000       4.254944       0.000000       0.398797   -9999.000000       0.507000       0.129600   -9999.000000
57680     57680     hunan          113.0697       28.7997          125       172     2012      02        27        058              0.000000       4.219055       0.852599       0.396541   -9999.000000       0.201700   -9999.000000       0.427000
57680     57680     hunan          113.0697       28.7997          125       172     2012      02        28        059              0.000000       5.216705       0.656421       0.395321   -9999.000000       0.379800   -9999.000000   -9999.000000
57680     57680     hunan          113.0697       28.7997          125       172     2012      02        29        060              0.000000   -9999.000000       0.274475   -9999.000000   -9999.000000   -9999.000000   -9999.000000   -9999.000000
57680     57680     hunan          113.0697       28.7997          125       172     2012      03        01        061              0.000000       8.729370       3.287478       0.393849   -9999.000000       0.378900       0.122500       0.503000
57680     57680     hunan          113.0697       28.7997          125       172     2012      03        02        062              0.000000       7.780365      16.485376       0.396250   -9999.000000       0.284400       0.151200   -9999.000000
57680     57680     hunan          113.0697       28.7997          125       172     2012      03        03        063              0.000000       6.984375      37.442841       0.409937   -9999.000000   -9999.000000       0.143100       1.000000
57680     57680     hunan          113.0697       28.7997          125       172     2012      03        04        064              0.000000       6.726105      14.718679       0.425215   -9999.000000       0.421400       0.170000   -9999.000000
57680     57680     hunan          113.0697       28.7997          125       172     2012      03        05        065              0.000000       5.311798       0.000000       0.515744   -9999.000000   -9999.000000   -9999.000000       0.754000
57680     57680     hunan          113.0697       28.7997          125       172     2012      03        06        066              0.000000       7.272278       5.110940       0.486245   -9999.000000       0.726700   -9999.000000       0.622000
57680     57680     hunan          113.0697       28.7997          125       172     2012      03        07        067              0.000000       7.223572       6.313007       0.429590   -9999.000000       0.187700       0.149700   -9999.000000
57680     57680     hunan          113.0697       28.7997          125       172     2012      03        08        068              0.000000       7.441162       8.519979       0.418365   -9999.000000   -9999.000000       0.159300       1.000000
57680     57680     hunan          113.0697       28.7997          125       172     2012      03        09        069              0.000000       6.347870       0.102272       0.418012   -9999.000000       0.496900       0.169400   -9999.000000
57680     57680     hunan          113.0697       28.7997          125       172     2012      03        10        070              0.000000       5.985504       0.000000       0.410999   -9999.000000   -9999.000000   -9999.000000       0.619000
57680     57680     hunan          113.0697       28.7997          125       172     2012      03        11        071              0.000000       9.572876       0.000000       0.405162   -9999.000000       0.373900   -9999.000000   -9999.000000
57680     57680     hunan          113.0697       28.7997          125       172     2012      03        12        072              0.000000      10.529602       0.694541       0.400853   -9999.000000       0.337800       0.142700   -9999.000000
57680     57680     hunan          113.0697       28.7997          125       172     2012      03        13        073              0.000000       8.796661       2.122054       0.400094   -9999.000000   -9999.000000       0.138700       0.581000
57680     57680     hunan          113.0697       28.7997          125       172     2012      03        14        074              0.000000      12.766327       4.008196       0.396121       0.204000       0.276100       0.162400   -9999.000000
57680     57680     hunan          113.0697       28.7997          125       172     2012      03        15        075              0.000000      11.655334       0.455113       0.397870   -9999.000000       0.381600       0.161300       0.746000
57680     57680     hunan          113.0697       28.7997          125       172     2012      03        16        076              0.000000      11.852692       0.838093       0.398708   -9999.000000       0.164600   -9999.000000   -9999.000000
57680     57680     hunan          113.0697       28.7997          125       172     2012      03        17        077              0.000000      11.508423       2.923547       0.394827   -9999.000000       0.207600   -9999.000000       0.384000
57680     57680     hunan          113.0697       28.7997          125       172     2012      03        18        078              0.000000      12.018646       5.449227       0.397213   -9999.000000   -9999.000000       0.158400       0.902000
57680     57680     hunan          113.0697       28.7997          125       172     2012      03        19        079              0.000000      14.822052       1.102331       0.398337   -9999.000000       0.421700       0.176400   -9999.000000
57680     57680     hunan          113.0697       28.7997          125       172     2012      03        20        080              0.000000      10.547577       1.388878       0.396886   -9999.000000       0.305500       0.206900       0.679000
57680     57680     hunan          113.0697       28.7997          125       172     2012      03        21        081              0.000000       8.147034       0.042983       0.395188   -9999.000000       0.572500       0.164700   -9999.000000
57680     57680     hunan          113.0697       28.7997          125       172     2012      03        22        082              0.000000       9.368774      23.602684       0.393458   -9999.000000       0.499100   -9999.000000       0.875000
57680     57680     hunan          113.0697       28.7997          125       172     2012      03        23        083              0.000000       8.198700       0.547428       0.409643   -9999.000000   -9999.000000   -9999.000000       0.886000
57680     57680     hunan          113.0697       28.7997          125       172     2012      03        24        084              0.000000      12.503448       0.000000       0.403774   -9999.000000       0.433200   -9999.000000   -9999.000000
57680     57680     hunan          113.0697       28.7997          125       172     2012      03        25        085              0.000000      14.475189       0.132411       0.394911   -9999.000000       0.201900       0.144500       0.197000
57680     57680     hunan          113.0697       28.7997          125       172     2012      03        26        086              0.000000      16.487061       9.436742       0.392435   -9999.000000   -9999.000000       0.223000   -9999.000000
57680     57680     hunan          113.0697       28.7997          125       172     2012      03        27        087              0.000000      18.331024       0.126336       0.389927   -9999.000000       0.420100   -9999.000000       0.447000
57680     57680     hunan          113.0697       28.7997          125       172     2012      03        28        088              0.000000      19.697815       0.827492       0.387419   -9999.000000   -9999.000000   -9999.000000   -9999.000000
57680     57680     hunan          113.0697       28.7997          125       172     2012      03        29        089              0.000000      18.552429      26.144085       0.388960   -9999.000000       0.330300       0.197700       0.745000
57680     57680     hunan          113.0697       28.7997          125       172     2012      03        30        090              0.000000      18.260376      13.344076       0.404500   -9999.000000       0.806300       0.234000       0.862000
57680     57680     hunan          113.0697       28.7997          125       172     2012      03        31        091              0.000000      15.919617       0.000000       0.414420   -9999.000000   -9999.000000       0.218700   -9999.000000
57680     57680     hunan          113.0697       28.7997          125       172     2012      04        01        092              0.000000      17.546417       0.000000       0.398284   -9999.000000       0.425400       0.223400       0.468000
57680     57680     hunan          113.0697       28.7997          125       172     2012      04        02        093              0.000000      18.550690       2.101774       0.394620   -9999.000000       0.442700   -9999.000000   -9999.000000
57680     57680     hunan          113.0697       28.7997          125       172     2012      04        03        094              0.000000      20.589783       0.725592       0.392303   -9999.000000       0.234000   -9999.000000       0.194000
57680     57680     hunan          113.0697       28.7997          125       172     2012      04        04        095              0.000000      17.997314      21.061670       0.390001   -9999.000000       0.408600       0.180700       0.547000
57680     57680     hunan          113.0697       28.7997          125       172     2012      04        05        096              0.000000      14.299713       0.058321       0.413970   -9999.000000   -9999.000000       0.167500   -9999.000000
57680     57680     hunan          113.0697       28.7997          125       172     2012      04        06        097              0.000000      15.808655       0.099747       0.400127   -9999.000000       0.353600       0.197100       0.635000
57680     57680     hunan          113.0697       28.7997          125       172     2012      04        07        098              0.000000      17.937775       0.566581       0.397241   -9999.000000       0.601100   -9999.000000   -9999.000000
57680     57680     hunan          113.0697       28.7997          125       172     2012      04        08        099              0.000000      19.356201       1.389648       0.395868   -9999.000000       0.289300   -9999.000000       0.002000
57680     57680     hunan          113.0697       28.7997          125       172     2012      04        09        100              0.000000      18.708527       0.743436       0.395185   -9999.000000       0.216200   -9999.000000   -9999.000000
57680     57680     hunan          113.0697       28.7997          125       172     2012      04        10        101              0.000000      19.128265       5.471573       0.395225   -9999.000000   -9999.000000       0.181400   -9999.000000
57680     57680     hunan          113.0697       28.7997          125       172     2012      04        11        102              0.000000      19.028656       5.672840       0.401130   -9999.000000       0.460500       0.180700       0.605000
57680     57680     hunan          113.0697       28.7997          125       172     2012      04        12        103              0.000000      19.339294      30.184010       0.402728   -9999.000000   -9999.000000       0.211100   -9999.000000
57680     57680     hunan          113.0697       28.7997          125       172     2012      04        13        104              0.000000      17.049591       0.069363       0.421056   -9999.000000   -9999.000000   -9999.000000       0.297000
57680     57680     hunan          113.0697       28.7997          125       172     2012      04        14        105              0.000000      18.343445       3.136340       0.404450   -9999.000000       0.469800   -9999.000000   -9999.000000
57680     57680     hunan          113.0697       28.7997          125       172     2012      04        15        106              0.000000      15.842987      21.631783       0.407508   -9999.000000   -9999.000000       0.198200       0.054000
57680     57680     hunan          113.0697       28.7997          125       172     2012      04        16        107              0.000000      14.514374       0.891440       0.421744   -9999.000000   -9999.000000       0.350700       0.845000
57680     57680     hunan          113.0697       28.7997          125       172     2012      04        17        108              0.000000      17.418518       1.064237       0.411779   -9999.000000       0.541500       0.360400   -9999.000000
57680     57680     hunan          113.0697       28.7997          125       172     2012      04        18        109              0.000000      17.080444       1.325786       0.409055   -9999.000000   -9999.000000   -9999.000000       0.384000
57680     57680     hunan          113.0697       28.7997          125       172     2012      04        19        110              0.000000      18.715668       1.211522       0.405146   -9999.000000       0.327600   -9999.000000   -9999.000000
57680     57680     hunan          113.0697       28.7997          125       172     2012      04        20        111              0.000000      21.650909       3.273861       0.401814   -9999.000000       0.573800   -9999.000000       0.716000
57680     57680     hunan          113.0697       28.7997          125       172     2012      04        21        112              0.000000      18.469849       0.246734       0.404080   -9999.000000       0.244500       0.292600       0.731000
57680     57680     hunan          113.0697       28.7997          125       172     2012      04        22        113              0.000000      21.402283       1.241980       0.397090   -9999.000000       0.475600       0.293500   -9999.000000
57680     57680     hunan          113.0697       28.7997          125       172     2012      04        23        114              0.000000      22.776611       2.807226       0.393520   -9999.000000   -9999.000000       0.394400       0.122000
57680     57680     hunan          113.0697       28.7997          125       172     2012      04        24        115              0.000000      22.679901       0.251465       0.394756   -9999.000000       0.365300   -9999.000000   -9999.000000
57680     57680     hunan          113.0697       28.7997          125       172     2012      04        25        116              0.000000      22.701324       3.997998       0.394705   -9999.000000   -9999.000000   -9999.000000       0.622000
57680     57680     hunan          113.0697       28.7997          125       172     2012      04        26        117              0.000000      19.234314       0.000000       0.397451   -9999.000000       0.331100   -9999.000000   -9999.000000
57680     57680     hunan          113.0697       28.7997          125       172     2012      04        27        118              0.000000      22.118469       0.000000       0.388906   -9999.000000       0.286400   -9999.000000       0.406000
57680     57680     hunan          113.0697       28.7997          125       172     2012      04        28        119              0.000000      23.411835      45.670258       0.386319   -9999.000000   -9999.000000       0.401100       0.211000
57680     57680     hunan          113.0697       28.7997          125       172     2012      04        29        120              0.000000      23.554291       1.122119       0.466479   -9999.000000       0.438400       0.410200   -9999.000000
57680     57680     hunan          113.0697       28.7997          125       172     2012      04        30        121              0.000000      23.921265      43.794239       0.412216   -9999.000000       0.328200   -9999.000000       1.000000
57680     57680     hunan          113.0697       28.7997          125       172     2012      05        01        122              0.000000      22.171997       7.275138       0.451220   -9999.000000   -9999.000000   -9999.000000   -9999.000000
57680     57680     hunan          113.0697       28.7997          125       172     2012      05        02        123              0.000000      21.609344       0.613845       0.440479   -9999.000000       0.497100       0.367000       0.747000
57680     57680     hunan          113.0697       28.7997          125       172     2012      05        03        124              0.000000      22.748749      10.679644       0.419487   -9999.000000   -9999.000000       0.426400       1.000000
57680     57680     hunan          113.0697       28.7997          125       172     2012      05        04        125              0.000000      21.639038       1.766382       0.418855   -9999.000000   -9999.000000       0.367900   -9999.000000
57680     57680     hunan          113.0697       28.7997          125       172     2012      05        05        126              0.000000      24.209015       0.000000       0.409600   -9999.000000   -9999.000000       0.384200       1.000000
57680     57680     hunan          113.0697       28.7997          125       172     2012      05        06        127              0.000000      26.309937       0.000000       0.401862   -9999.000000   -9999.000000   -9999.000000   -9999.000000
57680     57680     hunan          113.0697       28.7997          125       172     2012      05        07        128              0.000000      27.561096       0.000000       0.397072   -9999.000000       0.351800   -9999.000000       0.887000
57680     57680     hunan          113.0697       28.7997          125       172     2012      05        08        129              0.000000      28.399048       6.291184       0.393029   -9999.000000       0.265100       0.259900   -9999.000000
57680     57680     hunan          113.0697       28.7997          125       172     2012      05        09        130              0.000000      26.927429      12.140772       0.398538   -9999.000000       0.327900       0.365100   -9999.000000
57680     57680     hunan          113.0697       28.7997          125       172     2012      05        10        131              0.000000      24.331940       0.102179       0.408457   -9999.000000       0.214800       0.366000       1.000000
57680     57680     hunan          113.0697       28.7997          125       172     2012      05        11        132              0.000000      24.354279      28.795490       0.397753   -9999.000000   -9999.000000   -9999.000000   -9999.000000
57680     57680     hunan          113.0697       28.7997          125       172     2012      05        12        133              0.000000      27.434387      49.718174       0.406627   -9999.000000       0.478200   -9999.000000       1.000000
57680     57680     hunan          113.0697       28.7997          125       172     2012      05        13        134              0.000000      22.352386      21.573389       0.540544   -9999.000000   -9999.000000   -9999.000000   -9999.000000
57680     57680     hunan          113.0697       28.7997          125       172     2012      05        14        135              0.000000      21.370605       8.602446       0.534780       0.500000       0.334400       0.449600       0.525000
57680     57680     hunan          113.0697       28.7997          125       172     2012      05        15        136              0.000000      19.594421       0.046381       0.570840   -9999.000000       0.369100       0.449600       0.726000
57680     57680     hunan          113.0697       28.7997          125       172     2012      05        16        137              0.000000      22.069031       0.054401       0.441919   -9999.000000   -9999.000000       0.450700   -9999.000000
57680     57680     hunan          113.0697       28.7997          125       172     2012      05        17        138              0.000000      24.618896       0.046706       0.407707   -9999.000000   -9999.000000   -9999.000000       1.000000
57680     57680     hunan          113.0697       28.7997          125       172     2012      05        18        139              0.000000      27.327362      19.069202       0.399127   -9999.000000       0.687600   -9999.000000   -9999.000000
57680     57680     hunan          113.0697       28.7997          125       172     2012      05        19        140              0.000000      26.429230      12.273021       0.403507   -9999.000000   -9999.000000       0.450700       1.000000
57680     57680     hunan          113.0697       28.7997          125       172     2012      05        20        141              0.000000      24.747833       3.661395       0.413917   -9999.000000       0.579800       0.450700       1.000000
57680     57680     hunan          113.0697       28.7997          125       172     2012      05        21        142              0.000000      25.842194       0.384981       0.397274   -9999.000000   -9999.000000       0.249600   -9999.000000
57680     57680     hunan          113.0697       28.7997          125       172     2012      05        22        143              0.000000      26.031433      37.870266       0.394286       0.500000       0.577400       0.265200       1.000000
57680     57680     hunan          113.0697       28.7997          125       172     2012      05        23        144              0.000000      22.713593      21.441299       0.421914   -9999.000000       0.554000   -9999.000000   -9999.000000
57680     57680     hunan          113.0697       28.7997          125       172     2012      05        24        145              0.000000      22.220398      37.714382       0.420276   -9999.000000   -9999.000000   -9999.000000       1.000000
57680     57680     hunan          113.0697       28.7997          125       172     2012      05        25        146              0.000000      20.739990      23.847633       0.504967   -9999.000000       0.401800       0.297100   -9999.000000
57680     57680     hunan          113.0697       28.7997          125       172     2012      05        26        147              0.000000      20.979858       0.507030       0.602045   -9999.000000   -9999.000000       0.291100       0.648000
57680     57680     hunan          113.0697       28.7997          125       172     2012      05        27        148              0.000000      23.586121       7.758478       0.483582   -9999.000000       0.360800       0.319300       1.000000
57680     57680     hunan          113.0697       28.7997          125       172     2012      05        28        149              0.000000      24.703979       0.362332       0.415512   -9999.000000       0.413100   -9999.000000   -9999.000000
57680     57680     hunan          113.0697       28.7997          125       172     2012      05        29        150              0.000000      25.441132      29.977051       0.407576   -9999.000000   -9999.000000   -9999.000000       1.000000
57680     57680     hunan          113.0697       28.7997          125       172     2012      05        30        151              0.000000      24.012177       0.106662       0.422598   -9999.000000       0.535800   -9999.000000   -9999.000000
57680     57680     hunan          113.0697       28.7997          125       172     2012      05        31        152              0.000000      24.777985       6.928391       0.409111   -9999.000000       0.570400       0.227100   -9999.000000
57680     57680     hunan          113.0697       28.7997          125       172     2012      06        01        153              0.000000      25.202728       4.392991       0.406468   -9999.000000       0.355100       0.281700       1.000000
57680     57680     hunan          113.0697       28.7997          125       172     2012      06        02        154              0.000000      22.448608       0.000000       0.408010   -9999.000000       0.291400       0.247700   -9999.000000
57680     57680     hunan          113.0697       28.7997          125       172     2012      06        03        155              0.000000      25.150848      10.855074       0.399582   -9999.000000   -9999.000000   -9999.000000       1.000000
57680     57680     hunan          113.0697       28.7997          125       172     2012      06        04        156              0.000000      23.960968      19.115026       0.407358   -9999.000000       0.518300   -9999.000000   -9999.000000
57680     57680     hunan          113.0697       28.7997          125       172     2012      06        05        157              0.000000      23.031219       0.894776       0.418003   -9999.000000       0.634100       0.282500       1.000000
57680     57680     hunan          113.0697       28.7997          125       172     2012      06        06        158              0.000000      24.909424      14.036309       0.406839   -9999.000000   -9999.000000       0.203800   -9999.000000
57680     57680     hunan          113.0697       28.7997          125       172     2012      06        07        159              0.000000      25.511780       9.583891       0.411045   -9999.000000       0.368200       0.240700   -9999.000000
57680     57680     hunan          113.0697       28.7997          125       172     2012      06        08        160              0.000000      25.874847       0.000000       0.417631   -9999.000000   -9999.000000       0.196900       0.757000
57680     57680     hunan          113.0697       28.7997          125       172     2012      06        09        161              0.000000      27.418549       4.260780       0.408220   -9999.000000       0.817100   -9999.000000   -9999.000000
57680     57680     hunan          113.0697       28.7997          125       172     2012      06        10        162              0.000000      29.620819       8.791444       0.403333   -9999.000000       0.843800   -9999.000000       1.000000
57680     57680     hunan          113.0697       28.7997          125       172     2012      06        11        163              0.000000      27.770325       1.930395       0.409863   -9999.000000   -9999.000000       0.276600   -9999.000000
57680     57680     hunan          113.0697       28.7997          125       172     2012      06        12        164              0.000000      27.259918       0.644689       0.405130   -9999.000000       0.924700       0.231600       0.558000
57680     57680     hunan          113.0697       28.7997          125       172     2012      06        13        165              0.000000      28.809540       0.820566       0.397824   -9999.000000   -9999.000000       0.206300       0.475000
57680     57680     hunan          113.0697       28.7997          125       172     2012      06        14        166              0.000000      29.693329       0.166427       0.394658   -9999.000000       0.572900   -9999.000000   -9999.000000
57680     57680     hunan          113.0697       28.7997          125       172     2012      06        15        167              0.000000      27.813263       0.514231       0.393686   -9999.000000       0.504700   -9999.000000       0.556000
57680     57680     hunan          113.0697       28.7997          125       172     2012      06        16        168              0.000000      28.677887       0.000000       0.390660   -9999.000000   -9999.000000       0.233600   -9999.000000
57680     57680     hunan          113.0697       28.7997          125       172     2012      06        17        169              0.000000      28.003632       0.000000       0.387401   -9999.000000       0.622900       0.245600       0.649000
57680     57680     hunan          113.0697       28.7997          125       172     2012      06        18        170              0.000000      28.476288       0.000000       0.383418   -9999.000000       0.295800       0.263600       0.388000
57680     57680     hunan          113.0697       28.7997          125       172     2012      06        19        171              0.000000      28.879333       1.059883       0.380365   -9999.000000       0.424700       0.271300   -9999.000000
57680     57680     hunan          113.0697       28.7997          125       172     2012      06        20        172              0.000000      29.599060       0.000000       0.377211   -9999.000000       0.406600   -9999.000000       0.466000
57680     57680     hunan          113.0697       28.7997          125       172     2012      06        21        173              0.000000      30.281952       0.332557       0.374990   -9999.000000   -9999.000000   -9999.000000   -9999.000000
57680     57680     hunan          113.0697       28.7997          125       172     2012      06        22        174              0.000000      30.340485       0.134692       0.374990   -9999.000000       0.476500       0.246400       0.810000
57680     57680     hunan          113.0697       28.7997          125       172     2012      06        23        175              0.000000      29.351227       0.000000       0.372157   -9999.000000       0.487900       0.249300   -9999.000000
57680     57680     hunan          113.0697       28.7997          125       172     2012      06        24        176              0.000000      28.573273       0.061984       0.370376   -9999.000000   -9999.000000       0.244400       0.845000
57680     57680     hunan          113.0697       28.7997          125       172     2012      06        25        177              0.000000      29.790680       3.551979       0.367140       0.365000       0.601300       0.281400       0.551000
57680     57680     hunan          113.0697       28.7997          125       172     2012      06        26        178              0.000000      29.370514      25.480091       0.373429   -9999.000000   -9999.000000   -9999.000000   -9999.000000
57680     57680     hunan          113.0697       28.7997          125       172     2012      06        27        179              0.000000      28.041626      43.862206       0.405311   -9999.000000       0.453800   -9999.000000       1.000000
57680     57680     hunan          113.0697       28.7997          125       172     2012      06        28        180              0.000000      28.612000       2.148887       0.419924   -9999.000000       0.557500       0.300400   -9999.000000
57680     57680     hunan          113.0697       28.7997          125       172     2012      06        29        181              0.000000      28.949615       1.296539       0.407805   -9999.000000   -9999.000000       0.322200   -9999.000000
57680     57680     hunan          113.0697       28.7997          125       172     2012      06        30        182              0.000000      31.705383       1.751071       0.392112   -9999.000000       0.425800       0.272300   -9999.000000
57680     57680     hunan          113.0697       28.7997          125       172     2012      07        01        183              0.000000      31.623108       0.000000       0.388253   -9999.000000   -9999.000000   -9999.000000   -9999.000000
57680     57680     hunan          113.0697       28.7997          125       172     2012      07        02        184              0.000000      30.810608       0.000000       0.382835   -9999.000000       0.636500   -9999.000000       0.540000
57680     57680     hunan          113.0697       28.7997          125       172     2012      07        03        185              0.000000      30.892914       1.829571       0.377494   -9999.000000       0.509700       0.339900   -9999.000000
57680     57680     hunan          113.0697       28.7997          125       172     2012      07        04        186              0.000000      31.172821       0.494698       0.374363   -9999.000000   -9999.000000       0.288600       0.410000
57680     57680     hunan          113.0697       28.7997          125       172     2012      07        05        187              0.000000      31.202606       0.000000       0.371279   -9999.000000       0.601800       0.339600   -9999.000000
57680     57680     hunan          113.0697       28.7997          125       172     2012      07        06        188              0.000000      31.499237       1.006723       0.368340   -9999.000000       0.432700       0.281600   -9999.000000
57680     57680     hunan          113.0697       28.7997          125       172     2012      07        07        189              0.000000      31.975128       1.143062       0.365967   -9999.000000       0.330800   -9999.000000       0.180000
57680     57680     hunan          113.0697       28.7997          125       172     2012      07        08        190              0.000000      31.342804      13.970341       0.366448   -9999.000000       0.516700   -9999.000000   -9999.000000
57680     57680     hunan          113.0697       28.7997          125       172     2012      07        09        191              0.000000      31.456848       0.000000       0.363195   -9999.000000   -9999.000000       0.271500       0.420000
57680     57680     hunan          113.0697       28.7997          125       172     2012      07        10        192              0.000000      31.359344       0.000000       0.360974   -9999.000000       0.517300       0.354800   -9999.000000
57680     57680     hunan          113.0697       28.7997          125       172     2012      07        11        193              0.000000      31.378479       2.328573       0.359362   -9999.000000       0.767100       0.331900       0.010000
57680     57680     hunan          113.0697       28.7997          125       172     2012      07        12        194              0.000000      31.927094       9.925414       0.357619   -9999.000000   -9999.000000   -9999.000000       0.066000
57680     57680     hunan          113.0697       28.7997          125       172     2012      07        13        195              0.000000      31.095917      17.405020       0.375691       0.446000       0.481000   -9999.000000   -9999.000000
57680     57680     hunan          113.0697       28.7997          125       172     2012      07        14        196              0.000000      29.272888       1.267336       0.391603   -9999.000000   -9999.000000   -9999.000000       0.611000
57680     57680     hunan          113.0697       28.7997          125       172     2012      07        15        197              0.000000      29.400513       4.768070       0.390132   -9999.000000       0.493500       0.409000   -9999.000000
57680     57680     hunan          113.0697       28.7997          125       172     2012      07        16        198              0.000000      30.394409      55.497711       0.385675   -9999.000000       0.588300       0.323300       1.000000
57680     57680     hunan          113.0697       28.7997          125       172     2012      07        17        199              0.000000      27.648102      14.852360       0.428537   -9999.000000   -9999.000000       0.331500       0.642000
57680     57680     hunan          113.0697       28.7997          125       172     2012      07        18        200              0.000000      28.717987       9.044496       0.413057   -9999.000000       0.614600   -9999.000000   -9999.000000
57680     57680     hunan          113.0697       28.7997          125       172     2012      07        19        201              0.000000      28.792908       0.639271       0.406226   -9999.000000   -9999.000000   -9999.000000       0.225000
57680     57680     hunan          113.0697       28.7997          125       172     2012      07        20        202              0.000000      29.748810       0.000000       0.400501   -9999.000000   -9999.000000       0.356100   -9999.000000
57680     57680     hunan          113.0697       28.7997          125       172     2012      07        21        203              0.000000      31.542175       0.120543       0.391107   -9999.000000       0.700000       0.352000       0.174000
57680     57680     hunan          113.0697       28.7997          125       172     2012      07        22        204              0.000000      32.247314       1.277031       0.386536   -9999.000000   -9999.000000       0.384000   -9999.000000
57680     57680     hunan          113.0697       28.7997          125       172     2012      07        23        205              0.000000      32.381409       8.830301       0.385329   -9999.000000       0.780000       0.233200       0.257000
57680     57680     hunan          113.0697       28.7997          125       172     2012      07        24        206              0.000000      30.844269       1.567035       0.395631   -9999.000000       0.936200   -9999.000000       0.144000
57680     57680     hunan          113.0697       28.7997          125       172     2012      07        25        207              0.000000      30.872345       0.278700       0.389272   -9999.000000       0.364700   -9999.000000   -9999.000000
57680     57680     hunan          113.0697       28.7997          125       172     2012      07        26        208              0.000000      31.724609       0.918849       0.382495   -9999.000000       0.471300       0.302700       0.086000
57680     57680     hunan          113.0697       28.7997          125       172     2012      07        27        209              0.000000      31.739868       1.772793       0.379381   -9999.000000   -9999.000000       0.290000   -9999.000000
57680     57680     hunan          113.0697       28.7997          125       172     2012      07        28        210              0.000000      31.393372       3.509403       0.379630   -9999.000000       0.616500       0.264200       0.184000
57680     57680     hunan          113.0697       28.7997          125       172     2012      07        29        211              0.000000      31.809753       1.422115       0.375419   -9999.000000       0.342000   -9999.000000   -9999.000000
57680     57680     hunan          113.0697       28.7997          125       172     2012      07        30        212              0.000000      32.621094       8.465305       0.373277   -9999.000000       0.304100   -9999.000000   -9999.000000
57680     57680     hunan          113.0697       28.7997          125       172     2012      07        31        213              0.000000      32.395660       6.295038       0.383906   -9999.000000       0.373500   -9999.000000       0.159000
57680     57680     hunan          113.0697       28.7997          125       172     2012      08        01        214              0.000000      32.947571       0.410836       0.377084   -9999.000000   -9999.000000       0.240700   -9999.000000
57680     57680     hunan          113.0697       28.7997          125       172     2012      08        02        215              0.000000      32.649323       0.117529       0.371758   -9999.000000       0.649400       0.229000   -9999.000000
57680     57680     hunan          113.0697       28.7997          125       172     2012      08        03        216              0.000000      31.394867       3.558090       0.367745   -9999.000000       0.328500       0.184200   -9999.000000
57680     57680     hunan          113.0697       28.7997          125       172     2012      08        04        217              0.000000      30.468719      42.282402       0.370319   -9999.000000   -9999.000000   -9999.000000   -9999.000000
57680     57680     hunan          113.0697       28.7997          125       172     2012      08        05        218              0.000000      28.391205       0.127402       0.424034   -9999.000000       0.904800   -9999.000000       0.062000
57680     57680     hunan          113.0697       28.7997          125       172     2012      08        06        219              0.000000      29.286407       1.919056       0.394089   -9999.000000   -9999.000000       0.264200   -9999.000000
57680     57680     hunan          113.0697       28.7997          125       172     2012      08        07        220              0.000000      30.971741       2.251231       0.388327   -9999.000000   -9999.000000       0.251700       0.256000
57680     57680     hunan          113.0697       28.7997          125       172     2012      08        08        221              0.000000      30.827332       0.000000       0.383271   -9999.000000       0.636000       0.213300   -9999.000000
57680     57680     hunan          113.0697       28.7997          125       172     2012      08        09        222              0.000000      30.862732       1.149100       0.377745   -9999.000000   -9999.000000       0.242600       0.360000
57680     57680     hunan          113.0697       28.7997          125       172     2012      08        10        223              0.000000      30.555328       0.427212       0.376134   -9999.000000       0.595100   -9999.000000       0.040000
57680     57680     hunan          113.0697       28.7997          125       172     2012      08        11        224              0.000000      29.880981       0.316761       0.374725   -9999.000000       0.391300   -9999.000000   -9999.000000
57680     57680     hunan          113.0697       28.7997          125       172     2012      08        12        225              0.000000      29.925354       0.852690       0.374160       0.452000       0.480000       0.247200       0.611000
57680     57680     hunan          113.0697       28.7997          125       172     2012      08        13        226              0.000000      29.560760       0.338979       0.376567   -9999.000000       0.345000       0.329500   -9999.000000
57680     57680     hunan          113.0697       28.7997          125       172     2012      08        14        227              0.000000      30.409973       0.317118       0.373474   -9999.000000   -9999.000000       0.234100       0.287000
57680     57680     hunan          113.0697       28.7997          125       172     2012      08        15        228              0.000000      29.915344       0.865720       0.372377   -9999.000000       0.474600   -9999.000000       0.234000
57680     57680     hunan          113.0697       28.7997          125       172     2012      08        16        229              0.000000      31.395477       1.131116       0.369955   -9999.000000       0.359900   -9999.000000   -9999.000000
57680     57680     hunan          113.0697       28.7997          125       172     2012      08        17        230              0.000000      31.764221       5.842834       0.369288   -9999.000000   -9999.000000       0.275200       1.000000
57680     57680     hunan          113.0697       28.7997          125       172     2012      08        18        231              0.000000      31.213501       0.000000       0.377346   -9999.000000       0.347400       0.263700   -9999.000000
57680     57680     hunan          113.0697       28.7997          125       172     2012      08        19        232              0.000000      32.268494       1.338325       0.369926   -9999.000000   -9999.000000       0.233600       0.044000
57680     57680     hunan          113.0697       28.7997          125       172     2012      08        20        233              0.000000      32.598633       0.650707       0.365785   -9999.000000       0.331200       0.178100   -9999.000000
57680     57680     hunan          113.0697       28.7997          125       172     2012      08        21        234              0.000000      32.065521       3.102626       0.363468       0.469000       0.321500   -9999.000000   -9999.000000
57680     57680     hunan          113.0697       28.7997          125       172     2012      08        22        235              0.000000      27.753937       6.676725       0.370740   -9999.000000   -9999.000000   -9999.000000   -9999.000000
57680     57680     hunan          113.0697       28.7997          125       172     2012      08        23        236              0.000000      24.813934       0.641352       0.383315   -9999.000000       0.391600       0.179300   -9999.000000
57680     57680     hunan          113.0697       28.7997          125       172     2012      08        24        237              0.000000      24.636078       0.000000       0.375614   -9999.000000   -9999.000000       0.204300       0.643000
57680     57680     hunan          113.0697       28.7997          125       172     2012      08        25        238              0.000000      26.427979       0.000000       0.371922   -9999.000000   -9999.000000       0.206000   -9999.000000
57680     57680     hunan          113.0697       28.7997          125       172     2012      08        26        239              0.000000      28.075623       0.531094       0.368500   -9999.000000       0.292900       0.135900       0.248000
57680     57680     hunan          113.0697       28.7997          125       172     2012      08        27        240              0.000000      29.008575       0.000000       0.364691   -9999.000000   -9999.000000   -9999.000000       1.000000
57680     57680     hunan          113.0697       28.7997          125       172     2012      08        28        241              0.000000      28.607300       0.000000       0.362293   -9999.000000       0.449500   -9999.000000   -9999.000000
57680     57680     hunan          113.0697       28.7997          125       172     2012      08        29        242              0.000000      29.277161       0.000000       0.358683   -9999.000000       0.236900       0.258900       1.000000
57680     57680     hunan          113.0697       28.7997          125       172     2012      08        30        243              0.000000      30.071198       0.217790       0.355021   -9999.000000   -9999.000000       0.224300   -9999.000000
57680     57680     hunan          113.0697       28.7997          125       172     2012      08        31        244              0.000000      30.530396       3.473496       0.352832   -9999.000000       0.286800       0.191900       0.913000
57680     57680     hunan          113.0697       28.7997          125       172     2012      09        01        245              0.000000      31.317932      26.696915       0.349154   -9999.000000   -9999.000000   -9999.000000   -9999.000000
57680     57680     hunan          113.0697       28.7997          125       172     2012      09        02        246              0.000000      32.097198       5.341484       0.346092       0.410000       0.554400   -9999.000000   -9999.000000
57680     57680     hunan          113.0697       28.7997          125       172     2012      09        03        247              0.000000      28.109222       3.862985       0.352059   -9999.000000       0.350100       0.194300       0.753000
57680     57680     hunan          113.0697       28.7997          125       172     2012      09        04        248              0.000000      26.303558       3.511418       0.370660   -9999.000000       0.275700       0.203900   -9999.000000
57680     57680     hunan          113.0697       28.7997          125       172     2012      09        05        249              0.000000      27.365692       0.000000       0.368192   -9999.000000       0.479500       0.180700       0.538000
57680     57680     hunan          113.0697       28.7997          125       172     2012      09        06        250              0.000000      27.359161       0.000000       0.359716   -9999.000000   -9999.000000       0.167000   -9999.000000
57680     57680     hunan          113.0697       28.7997          125       172     2012      09        07        251              0.000000      28.304901       0.000000       0.354832       0.438000       0.301500   -9999.000000       0.332000
57680     57680     hunan          113.0697       28.7997          125       172     2012      09        08        252              0.000000      29.812195       7.338793       0.351580       0.355000       0.223800   -9999.000000       0.510000
57680     57680     hunan          113.0697       28.7997          125       172     2012      09        09        253              0.000000      28.941772       0.363770       0.360868   -9999.000000   -9999.000000       0.205300   -9999.000000
57680     57680     hunan          113.0697       28.7997          125       172     2012      09        10        254              0.000000      25.423615       1.491917       0.365286   -9999.000000       0.366900       0.193300       0.309000
57680     57680     hunan          113.0697       28.7997          125       172     2012      09        11        255              0.000000      26.717163       3.091294       0.361923       0.362000   -9999.000000       0.158500   -9999.000000
57680     57680     hunan          113.0697       28.7997          125       172     2012      09        12        256              0.000000      29.025452      10.621300       0.360582   -9999.000000       0.430800   -9999.000000       0.502000
57680     57680     hunan          113.0697       28.7997          125       172     2012      09        13        257              0.000000      23.931610       0.859540       0.373624   -9999.000000       0.437200   -9999.000000       1.000000
57680     57680     hunan          113.0697       28.7997          125       172     2012      09        14        258              0.000000      21.663330       0.236167       0.379321   -9999.000000   -9999.000000   -9999.000000   -9999.000000
57680     57680     hunan          113.0697       28.7997          125       172     2012      09        15        259              0.000000      23.209320       0.105227       0.367377   -9999.000000       0.498900       0.183300       0.112000
57680     57680     hunan          113.0697       28.7997          125       172     2012      09        16        260              0.000000      23.353149       0.000000       0.360964       0.364000       0.277900       0.154500   -9999.000000
57680     57680     hunan          113.0697       28.7997          125       172     2012      09        17        261              0.000000      23.144196       0.273182       0.358899   -9999.000000       0.217900       0.144900       0.031000
57680     57680     hunan          113.0697       28.7997          125       172     2012      09        18        262              0.000000      23.546631       0.000000       0.357133   -9999.000000       0.338100   -9999.000000   -9999.000000
57680     57680     hunan          113.0697       28.7997          125       172     2012      09        19        263              0.000000      24.773102       0.114437       0.353394   -9999.000000   -9999.000000   -9999.000000       0.579000
57680     57680     hunan          113.0697       28.7997          125       172     2012      09        20        264              0.000000      25.725037       9.221123       0.350006   -9999.000000       0.495800       0.164800       0.166000
57680     57680     hunan          113.0697       28.7997          125       172     2012      09        21        265              0.000000      26.264709      20.699759       0.358461   -9999.000000       0.394700       0.177600   -9999.000000
57680     57680     hunan          113.0697       28.7997          125       172     2012      09        22        266              0.000000      23.561676       0.478497       0.399823   -9999.000000       0.456200       0.153200       0.863000
57680     57680     hunan          113.0697       28.7997          125       172     2012      09        23        267              0.000000      24.823090       1.351274       0.384193   -9999.000000       0.432300       0.159300   -9999.000000
57680     57680     hunan          113.0697       28.7997          125       172     2012      09        24        268              0.000000      24.555023       0.157264       0.380091   -9999.000000   -9999.000000   -9999.000000       0.445000
57680     57680     hunan          113.0697       28.7997          125       172     2012      09        25        269              0.000000      24.632416       0.355058       0.375358   -9999.000000       0.379700   -9999.000000       1.000000
57680     57680     hunan          113.0697       28.7997          125       172     2012      09        26        270              0.000000      26.170624       0.131458       0.370315   -9999.000000       0.269500       0.242100   -9999.000000
57680     57680     hunan          113.0697       28.7997          125       172     2012      09        27        271              0.000000      25.690247       0.000000       0.366583   -9999.000000   -9999.000000       0.230100       0.741000
57680     57680     hunan          113.0697       28.7997          125       172     2012      09        28        272              0.000000      24.740784       0.000000       0.364585   -9999.000000   -9999.000000       0.215900   -9999.000000
57680     57680     hunan          113.0697       28.7997          125       172     2012      09        29        273              0.000000      22.292511       0.000000       0.357618   -9999.000000   -9999.000000   -9999.000000       0.500000
57680     57680     hunan          113.0697       28.7997          125       172     2012      09        30        274              0.000000      21.471741       0.000000       0.354406   -9999.000000   -9999.000000   -9999.000000   -9999.000000
57680     57680     hunan          113.0697       28.7997          125       172     2012      10        01        275              0.000000      21.508759       0.000000       0.353562   -9999.000000   -9999.000000   -9999.000000   -9999.000000
57680     57680     hunan          113.0697       28.7997          125       172     2012      10        02        276              0.000000      23.024445       0.060404       0.351018   -9999.000000   -9999.000000       0.208000       0.570000
57680     57680     hunan          113.0697       28.7997          125       172     2012      10        03        277              0.000000      23.659668       0.074350       0.348912       0.287000       0.358800       0.190600   -9999.000000
57680     57680     hunan          113.0697       28.7997          125       172     2012      10        04        278              0.000000      21.793365       0.634029       0.351636       0.316000       0.262800       0.171000       0.898000
57680     57680     hunan          113.0697       28.7997          125       172     2012      10        05        279              0.000000      21.048096       0.928236       0.354702       0.301000       0.237300   -9999.000000   -9999.000000
57680     57680     hunan          113.0697       28.7997          125       172     2012      10        06        280              0.000000      19.717255       0.680123       0.357541   -9999.000000       0.349300   -9999.000000       0.752000
57680     57680     hunan          113.0697       28.7997          125       172     2012      10        07        281              0.000000      22.080994       0.816873       0.355321   -9999.000000   -9999.000000       0.184000       0.442000
57680     57680     hunan          113.0697       28.7997          125       172     2012      10        08        282              0.000000      21.589905       0.687334       0.355563       0.322000       0.284800       0.166400   -9999.000000
57680     57680     hunan          113.0697       28.7997          125       172     2012      10        09        283              0.000000      20.674347       0.109427       0.357282   -9999.000000       0.442300       0.120300       0.492000
57680     57680     hunan          113.0697       28.7997          125       172     2012      10        10        284              0.000000      21.630035       0.424581       0.356505   -9999.000000       0.298400       0.133400   -9999.000000
57680     57680     hunan          113.0697       28.7997          125       172     2012      10        11        285              0.247267      22.153687       0.087485       0.352248   -9999.000000       0.325300   -9999.000000       0.373000
57680     57680     hunan          113.0697       28.7997          125       172     2012      10        12        286              0.248667      22.664215       0.000000       0.350718   -9999.000000   -9999.000000   -9999.000000       0.412000
57680     57680     hunan          113.0697       28.7997          125       172     2012      10        13        287              0.247375      21.843628       0.148553       0.350299       0.260000       0.273800       0.141900   -9999.000000
57680     57680     hunan          113.0697       28.7997          125       172     2012      10        14        288              0.247750      19.699860       3.069763       0.351922       0.228000       0.237000       0.157100       0.415000
57680     57680     hunan          113.0697       28.7997          125       172     2012      10        15        289              0.251833      19.736206       0.213597       0.361359   -9999.000000   -9999.000000       0.147100   -9999.000000
57680     57680     hunan          113.0697       28.7997          125       172     2012      10        16        290              0.270500      21.766602       7.897683       0.358021       0.316000       0.270300   -9999.000000       0.607000
57680     57680     hunan          113.0697       28.7997          125       172     2012      10        17        291              0.276667      19.319489       0.498282       0.376092   -9999.000000   -9999.000000   -9999.000000   -9999.000000
57680     57680     hunan          113.0697       28.7997          125       172     2012      10        18        292              0.270333      18.483398       0.680165       0.363234   -9999.000000       0.435800       0.136600       0.544000
57680     57680     hunan          113.0697       28.7997          125       172     2012      10        19        293              0.266625      19.843475       0.059452       0.358928   -9999.000000       0.475400       0.142300       0.599000
57680     57680     hunan          113.0697       28.7997          125       172     2012      10        20        294              0.262333      21.039673       0.611415       0.357870       0.267500   -9999.000000       0.131700   -9999.000000
57680     57680     hunan          113.0697       28.7997          125       172     2012      10        21        295              0.275708      22.947418      10.123107       0.357042       0.262000       0.417200       0.141700       1.000000
57680     57680     hunan          113.0697       28.7997          125       172     2012      10        22        296              0.310250      23.026062       1.383701       0.369214   -9999.000000   -9999.000000   -9999.000000   -9999.000000
57680     57680     hunan          113.0697       28.7997          125       172     2012      10        23        297              0.297167      17.576294       1.333974       0.375683   -9999.000000       0.533000   -9999.000000       0.563000
57680     57680     hunan          113.0697       28.7997          125       172     2012      10        24        298              0.287417      18.751892       0.484348       0.366877   -9999.000000       0.318500       0.136100       0.910000
57680     57680     hunan          113.0697       28.7997          125       172     2012      10        25        299              0.000000      16.646698       0.582659       0.366450   -9999.000000   -9999.000000       0.145100   -9999.000000
57680     57680     hunan          113.0697       28.7997          125       172     2012      10        26        300              0.280625      16.898712       0.146073       0.367292   -9999.000000       0.424300       0.122600       0.877000
57680     57680     hunan          113.0697       28.7997          125       172     2012      10        27        301              0.277917      17.897217       0.268886       0.365553   -9999.000000       0.510800       0.113900   -9999.000000
57680     57680     hunan          113.0697       28.7997          125       172     2012      10        28        302              0.000000      18.491058       8.328762       0.364502   -9999.000000       0.504600   -9999.000000       0.827000
57680     57680     hunan          113.0697       28.7997          125       172     2012      10        29        303              0.334750      19.493835      32.797928       0.370750   -9999.000000       0.455400   -9999.000000   -9999.000000
57680     57680     hunan          113.0697       28.7997          125       172     2012      10        30        304              0.305417      18.118744       0.585630       0.416074   -9999.000000   -9999.000000       0.127500   -9999.000000
57680     57680     hunan          113.0697       28.7997          125       172     2012      10        31        305              0.295458      17.781830       0.208471       0.393522   -9999.000000       0.269400       0.115400       0.949000
57680     57680     hunan          113.0697       28.7997          125       172     2012      11        01        306              0.289292      17.551849       0.330083       0.384345   -9999.000000       0.308500       0.120500   -9999.000000
57680     57680     hunan          113.0697       28.7997          125       172     2012      11        02        307              0.283917      17.061310       0.442323       0.379736   -9999.000000   -9999.000000   -9999.000000       0.666000
57680     57680     hunan          113.0697       28.7997          125       172     2012      11        03        308              0.286250      17.672394       5.967342       0.375457   -9999.000000       0.400900   -9999.000000   -9999.000000
57680     57680     hunan          113.0697       28.7997          125       172     2012      11        04        309              0.289875      14.882904       0.904004       0.385463   -9999.000000   -9999.000000       0.129400       0.795000
57680     57680     hunan          113.0697       28.7997          125       172     2012      11        05        310              0.281917      15.599274       1.210869       0.377938   -9999.000000       0.452100       0.126300       0.842000
57680     57680     hunan          113.0697       28.7997          125       172     2012      11        06        311              0.280125      14.749908       0.269886       0.376441   -9999.000000       0.399700       0.122400   -9999.000000
57680     57680     hunan          113.0697       28.7997          125       172     2012      11        07        312              0.284708      15.634796       9.605241       0.373938   -9999.000000   -9999.000000       0.130800       0.860000
57680     57680     hunan          113.0697       28.7997          125       172     2012      11        08        313              0.329136      14.097504       3.993722       0.382628   -9999.000000       0.337500   -9999.000000   -9999.000000
57680     57680     hunan          113.0697       28.7997          125       172     2012      11        09        314              0.340750      13.646271      12.098156       0.389870   -9999.000000   -9999.000000   -9999.000000       1.000000
57680     57680     hunan          113.0697       28.7997          125       172     2012      11        10        315              0.319625      13.058807       0.769031       0.398873   -9999.000000       0.293400       0.138300       1.000000
57680     57680     hunan          113.0697       28.7997          125       172     2012      11        11        316              0.305500      13.062714       0.000000       0.391459   -9999.000000       0.328900       0.135100   -9999.000000
57680     57680     hunan          113.0697       28.7997          125       172     2012      11        12        317              0.297375      13.416809       0.227999       0.382548   -9999.000000   -9999.000000       0.165100       0.679000
57680     57680     hunan          113.0697       28.7997          125       172     2012      11        13        318              0.000000      13.296387       0.000000       0.379351   -9999.000000       0.362900   -9999.000000   -9999.000000
57680     57680     hunan          113.0697       28.7997          125       172     2012      11        14        319              0.288917      15.746063       6.881992       0.376059   -9999.000000       0.344700   -9999.000000       1.000000
57680     57680     hunan          113.0697       28.7997          125       172     2012      11        15        320              0.338292      14.808136      42.656693       0.380595   -9999.000000       0.577500   -9999.000000   -9999.000000
57680     57680     hunan          113.0697       28.7997          125       172     2012      11        16        321              0.330292      11.775574       9.478529       0.423341   -9999.000000       0.566200       0.181000       1.000000
57680     57680     hunan          113.0697       28.7997          125       172     2012      11        17        322              0.000000      10.051117       0.239198       0.409289   -9999.000000   -9999.000000       0.167700       0.972000
57680     57680     hunan          113.0697       28.7997          125       172     2012      11        18        323              0.306542      11.342651       0.000000       0.394515   -9999.000000       0.369800       0.171400   -9999.000000
57680     57680     hunan          113.0697       28.7997          125       172     2012      11        19        324              0.302125      13.034698       0.208134       0.388057   -9999.000000       0.291700   -9999.000000       1.000000
57680     57680     hunan          113.0697       28.7997          125       172     2012      11        20        325              0.319125      12.818909      25.232409       0.385664   -9999.000000   -9999.000000   -9999.000000   -9999.000000
57680     57680     hunan          113.0697       28.7997          125       172     2012      11        21        326              0.330833      12.340576       6.957530       0.403633   -9999.000000       0.310200       0.158200       1.000000
57680     57680     hunan          113.0697       28.7997          125       172     2012      11        22        327              0.338792      11.617767      19.928701       0.409094   -9999.000000   -9999.000000       0.153800       1.000000
57680     57680     hunan          113.0697       28.7997          125       172     2012      11        23        328              0.318875      11.196259       1.942198       0.415371   -9999.000000       0.553700       0.138900   -9999.000000
57680     57680     hunan          113.0697       28.7997          125       172     2012      11        24        329              0.313875       9.845001       2.219213       0.398060   -9999.000000       0.493300       0.151200       1.000000
57680     57680     hunan          113.0697       28.7997          125       172     2012      11        25        330              0.317833      10.364624       1.827786       0.396585   -9999.000000   -9999.000000   -9999.000000   -9999.000000
57680     57680     hunan          113.0697       28.7997          125       172     2012      11        26        331              0.310417       9.153015       0.158150       0.398687   -9999.000000       0.541700   -9999.000000       0.913000
57680     57680     hunan          113.0697       28.7997          125       172     2012      11        27        332              0.304792      10.141968       1.251063       0.394064   -9999.000000   -9999.000000       0.142300   -9999.000000
57680     57680     hunan          113.0697       28.7997          125       172     2012      11        28        333              0.305958       9.722076       0.120914       0.394884   -9999.000000       0.308400       0.129000   -9999.000000
57680     57680     hunan          113.0697       28.7997          125       172     2012      11        29        334              0.304583      10.823975       1.257327       0.393774   -9999.000000       0.398900       0.158900       1.000000
57680     57680     hunan          113.0697       28.7997          125       172     2012      11        30        335              0.305870      10.171539       2.213930       0.394521   -9999.000000   -9999.000000   -9999.000000   -9999.000000
57680     57680     hunan          113.0697       28.7997          125       172     2012      12        01        336              0.330667       9.722656       2.313972       0.395311   -9999.000000       0.489300   -9999.000000       1.000000
57680     57680     hunan          113.0697       28.7997          125       172     2012      12        02        337              0.317042       8.159424       1.288232       0.398366   -9999.000000       0.489600   -9999.000000   -9999.000000
57680     57680     hunan          113.0697       28.7997          125       172     2012      12        03        338              0.311833       7.713837       0.093171       0.394240   -9999.000000       0.459800       0.124900       0.763000
57680     57680     hunan          113.0697       28.7997          125       172     2012      12        04        339              0.307417       9.037628       0.000000       0.392717   -9999.000000       0.405300       0.139800       0.928000
57680     57680     hunan          113.0697       28.7997          125       172     2012      12        05        340              0.302458       9.189850       0.000000       0.392190   -9999.000000   -9999.000000       0.143900   -9999.000000
57680     57680     hunan          113.0697       28.7997          125       172     2012      12        06        341              0.297333       9.772156       0.354303       0.391154   -9999.000000       0.278100   -9999.000000       0.875000
57680     57680     hunan          113.0697       28.7997          125       172     2012      12        07        342              0.292833      10.725555       0.000000       0.390330   -9999.000000   -9999.000000   -9999.000000   -9999.000000
57680     57680     hunan          113.0697       28.7997          125       172     2012      12        08        343              0.291375      10.485443       0.344150       0.389969   -9999.000000   -9999.000000       0.132700       1.000000
57680     57680     hunan          113.0697       28.7997          125       172     2012      12        09        344              0.288500      10.819763       0.668203       0.388990   -9999.000000       0.564900       0.122400       1.000000
57680     57680     hunan          113.0697       28.7997          125       172     2012      12        10        345              0.299750       9.499542       5.748203       0.388939   -9999.000000   -9999.000000       0.125000   -9999.000000
57680     57680     hunan          113.0697       28.7997          125       172     2012      12        11        346              0.306792       7.061157       0.189446       0.397031   -9999.000000       0.383600       0.127900       0.562000
57680     57680     hunan          113.0697       28.7997          125       172     2012      12        12        347              0.307083       6.990295       0.244820       0.391848   -9999.000000       0.474000   -9999.000000   -9999.000000
57680     57680     hunan          113.0697       28.7997          125       172     2012      12        13        348              0.309125       8.080231       0.353362       0.390487   -9999.000000   -9999.000000   -9999.000000       1.000000
57680     57680     hunan          113.0697       28.7997          125       172     2012      12        14        349              0.308375       8.768402       3.914928       0.390668   -9999.000000       0.375800       0.137600   -9999.000000
57680     57680     hunan          113.0697       28.7997          125       172     2012      12        15        350              0.000000       6.728821       2.916188       0.394314   -9999.000000   -9999.000000       0.135500       1.000000
57680     57680     hunan          113.0697       28.7997          125       172     2012      12        16        351              0.321917       6.555756       0.124330       0.395576   -9999.000000   -9999.000000       0.126200       0.881000
57680     57680     hunan          113.0697       28.7997          125       172     2012      12        17        352              0.340625       6.790497       9.973583       0.392730   -9999.000000       0.548300   -9999.000000   -9999.000000
57680     57680     hunan          113.0697       28.7997          125       172     2012      12        18        353              0.321500       5.954102       0.000000       0.403857   -9999.000000   -9999.000000   -9999.000000       1.000000
57680     57680     hunan          113.0697       28.7997          125       172     2012      12        19        354              0.325125       5.103424       4.262537       0.395777   -9999.000000       0.472500       0.143400   -9999.000000
57680     57680     hunan          113.0697       28.7997          125       172     2012      12        20        355              0.000000       6.228302      16.566393       0.397870   -9999.000000       0.276700       0.168400       1.000000
57680     57680     hunan          113.0697       28.7997          125       172     2012      12        21        356              0.325375       4.399963       0.000000       0.411821   -9999.000000       0.368100       0.149500       0.638000
57680     57680     hunan          113.0697       28.7997          125       172     2012      12        22        357              0.315792       3.742462       0.000000       0.402153   -9999.000000       0.280500       0.157400   -9999.000000
57680     57680     hunan          113.0697       28.7997          125       172     2012      12        23        358              0.308625       4.333984       0.000000       0.398595   -9999.000000   -9999.000000   -9999.000000       0.704000
57680     57680     hunan          113.0697       28.7997          125       172     2012      12        24        359              0.303000       4.196289       0.000000       0.395966   -9999.000000       0.287400   -9999.000000   -9999.000000
57680     57680     hunan          113.0697       28.7997          125       172     2012      12        25        360              0.303250       5.690155       2.325424       0.396161   -9999.000000   -9999.000000       0.159300       0.688000
57680     57680     hunan          113.0697       28.7997          125       172     2012      12        26        361              0.000000       3.126282      16.666653       0.397079   -9999.000000       0.238000       0.180100   -9999.000000
57680     57680     hunan          113.0697       28.7997          125       172     2012      12        27        362              0.348500       2.024078       0.845391       0.402700   -9999.000000       0.360600       0.189400   -9999.000000
57680     57680     hunan          113.0697       28.7997          125       172     2012      12        28        363              0.325000       2.687592      19.153603       0.402399   -9999.000000   -9999.000000   -9999.000000       1.000000
57680     57680     hunan          113.0697       28.7997          125       172     2012      12        29        364              0.000000       2.858032       4.122017       0.408948   -9999.000000   -9999.000000   -9999.000000   -9999.000000
57680     57680     hunan          113.0697       28.7997          125       172     2012      12        30        365              0.000000       2.925690       1.660857       0.410831   -9999.000000       0.204600   -9999.000000       0.529000
57680     57680     hunan          113.0697       28.7997          125       172     2012      12        31        366              0.312067       2.273895       3.986362       0.406741   -9999.000000   -9999.000000       0.167600   -9999.000000
