# Supplementary material for: Research on Fusing Multisatellite Soil Moisture Data Based on Bayesian Model Averaging
Source: Hindawi journal article supplement (doi:10.1155/2018/9310838), 2018-06-25
Supplement: f1 [file 9310838.f1.zip › 2012_sm00-10cm_daily_ZDB_ZHY_57682_366days_allin.txt]

57682     57682     hunan          113.5597       28.7097          125       174     2012      01        01        001              0.000000   -9999.000000       0.000000   -9999.000000       0.125500   -9999.000000       0.089800   -9999.000000
57682     57682     hunan          113.5597       28.7097          125       174     2012      01        02        002              0.231375       4.861847       0.272749       0.344522       0.136000       0.397200       0.077300   -9999.000000
57682     57682     hunan          113.5597       28.7097          125       174     2012      01        03        003              0.000000       4.701691       1.194030       0.334315   -9999.000000   -9999.000000   -9999.000000       0.053000
57682     57682     hunan          113.5597       28.7097          125       174     2012      01        04        004              0.230333       2.567535       2.011938       0.328965   -9999.000000       0.117400   -9999.000000   -9999.000000
57682     57682     hunan          113.5597       28.7097          125       174     2012      01        05        005              0.234583       3.751099       0.000000       0.327598   -9999.000000       0.220500       0.073000       0.110000
57682     57682     hunan          113.5597       28.7097          125       174     2012      01        06        006              0.281458       2.482178       0.000000       0.324107       0.128000   -9999.000000       0.074000   -9999.000000
57682     57682     hunan          113.5597       28.7097          125       174     2012      01        07        007              0.281792       4.274353       0.000000       0.324191       0.136500       0.255600       0.079000       0.029000
57682     57682     hunan          113.5597       28.7097          125       174     2012      01        08        008              0.000000       3.371185       0.000000       0.323895       0.160000       0.091500   -9999.000000       0.051000
57682     57682     hunan          113.5597       28.7097          125       174     2012      01        09        009              0.256250       2.981842       2.814686       0.323441   -9999.000000   -9999.000000   -9999.000000   -9999.000000
57682     57682     hunan          113.5597       28.7097          125       174     2012      01        10        010              0.244083       3.736694       0.000000       0.322896   -9999.000000       0.319200       0.080400       0.183000
57682     57682     hunan          113.5597       28.7097          125       174     2012      01        11        011              0.267542       3.722900       0.000000       0.322290       0.144500   -9999.000000       0.064000   -9999.000000
57682     57682     hunan          113.5597       28.7097          125       174     2012      01        12        012              0.235167       4.330841       0.000000       0.321535       0.151000   -9999.000000       0.062600       0.102000
57682     57682     hunan          113.5597       28.7097          125       174     2012      01        13        013              0.217500       4.234039       2.263011       0.321013       0.160000       0.139500       0.061900       0.014000
57682     57682     hunan          113.5597       28.7097          125       174     2012      01        14        014              0.284792       3.783844      22.092419       0.323301   -9999.000000   -9999.000000   -9999.000000   -9999.000000
57682     57682     hunan          113.5597       28.7097          125       174     2012      01        15        015              0.298750       3.404205       7.718728       0.345231   -9999.000000       0.319500   -9999.000000       0.762000
57682     57682     hunan          113.5597       28.7097          125       174     2012      01        16        016              0.278250       2.198090       1.280278       0.337748   -9999.000000   -9999.000000       0.060600   -9999.000000
57682     57682     hunan          113.5597       28.7097          125       174     2012      01        17        017              0.000000       2.408173       6.270939       0.336691   -9999.000000       0.205000       0.066200       0.617000
57682     57682     hunan          113.5597       28.7097          125       174     2012      01        18        018              0.288208       3.468781       4.090679       0.336095   -9999.000000       0.343600       0.068500   -9999.000000
57682     57682     hunan          113.5597       28.7097          125       174     2012      01        19        019              0.283500       4.302124       1.493714       0.336169   -9999.000000   -9999.000000       0.060000   -9999.000000
57682     57682     hunan          113.5597       28.7097          125       174     2012      01        20        020              0.279750       3.834503       2.592265       0.333539   -9999.000000       0.380100   -9999.000000       0.740000
57682     57682     hunan          113.5597       28.7097          125       174     2012      01        21        021              0.282625       3.779022       3.554334       0.332270   -9999.000000       0.535400   -9999.000000   -9999.000000
57682     57682     hunan          113.5597       28.7097          125       174     2012      01        22        022              0.278042       1.863464       1.191675       0.322822   -9999.000000   -9999.000000       0.059400       0.175000
57682     57682     hunan          113.5597       28.7097          125       174     2012      01        23        023              0.269042       0.889435       1.022347       0.288461   -9999.000000       0.300100       0.100500   -9999.000000
57682     57682     hunan          113.5597       28.7097          125       174     2012      01        24        024              0.265500       1.139343       0.151881       0.286936   -9999.000000   -9999.000000   -9999.000000       0.073000
57682     57682     hunan          113.5597       28.7097          125       174     2012      01        25        025              0.260250       1.292480       0.261605       0.282228   -9999.000000       0.248900   -9999.000000       0.075000
57682     57682     hunan          113.5597       28.7097          125       174     2012      01        26        026              0.257333       2.539001       0.259978       0.301056   -9999.000000   -9999.000000   -9999.000000   -9999.000000
57682     57682     hunan          113.5597       28.7097          125       174     2012      01        27        027              0.256000       3.815186       0.234563       0.318886       0.173000   -9999.000000       0.118700       0.202000
57682     57682     hunan          113.5597       28.7097          125       174     2012      01        28        028              0.255375       2.709381       0.000000       0.321931   -9999.000000       0.314900       0.091700   -9999.000000
57682     57682     hunan          113.5597       28.7097          125       174     2012      01        29        029              0.253625       3.131958       0.661094       0.319824   -9999.000000   -9999.000000       0.095800       0.092000
57682     57682     hunan          113.5597       28.7097          125       174     2012      01        30        030              0.252000       3.705872       0.000000       0.321387   -9999.000000       0.112800       0.115300       0.090000
57682     57682     hunan          113.5597       28.7097          125       174     2012      01        31        031              0.249458       3.554352       0.000000       0.319523   -9999.000000       0.146800   -9999.000000   -9999.000000
57682     57682     hunan          113.5597       28.7097          125       174     2012      02        01        032              0.245958       6.084930       0.211013       0.318705       0.137500   -9999.000000   -9999.000000       0.098000
57682     57682     hunan          113.5597       28.7097          125       174     2012      02        02        033              0.242917       7.386230       0.000000       0.317549   -9999.000000       0.275700       0.100700   -9999.000000
57682     57682     hunan          113.5597       28.7097          125       174     2012      02        03        034              0.240375       3.027893       0.880975       0.316893       0.144000   -9999.000000       0.125800       0.143000
57682     57682     hunan          113.5597       28.7097          125       174     2012      02        04        035              0.241750       5.915070       0.493674       0.316241       0.164000       0.260500       0.102800   -9999.000000
57682     57682     hunan          113.5597       28.7097          125       174     2012      02        05        036              0.249167       4.331299       5.331701       0.317729   -9999.000000       0.223700   -9999.000000       0.554000
57682     57682     hunan          113.5597       28.7097          125       174     2012      02        06        037              0.286714       4.700317       3.323979       0.323514       0.128000   -9999.000000   -9999.000000       0.636000
57682     57682     hunan          113.5597       28.7097          125       174     2012      02        07        038              0.000000       4.848633      23.342726       0.327963   -9999.000000       0.366100   -9999.000000   -9999.000000
57682     57682     hunan          113.5597       28.7097          125       174     2012      02        08        039              0.000000       4.875275       0.000000       0.318105   -9999.000000       0.134100       0.085800       0.268000
57682     57682     hunan          113.5597       28.7097          125       174     2012      02        09        040              0.257696       3.999939       0.000000       0.315639   -9999.000000   -9999.000000       0.088000   -9999.000000
57682     57682     hunan          113.5597       28.7097          125       174     2012      02        10        041              0.255708       2.770538       0.000000       0.313476   -9999.000000       0.432700       0.087000       0.052000
57682     57682     hunan          113.5597       28.7097          125       174     2012      02        11        042              0.252583       3.399475       0.644626       0.311480       0.134000   -9999.000000   -9999.000000       0.235000
57682     57682     hunan          113.5597       28.7097          125       174     2012      02        12        043              0.263125       4.442047       2.142575       0.313708       0.136000       0.516300   -9999.000000   -9999.000000
57682     57682     hunan          113.5597       28.7097          125       174     2012      02        13        044              0.273667       3.968048       0.827762       0.318354       0.142000       0.158000   -9999.000000       0.584000
57682     57682     hunan          113.5597       28.7097          125       174     2012      02        14        045              0.272083       4.434875       2.036732       0.317030       0.197000   -9999.000000       0.168200   -9999.000000
57682     57682     hunan          113.5597       28.7097          125       174     2012      02        15        046              0.268917       3.958740       0.752145       0.319265   -9999.000000       0.224800       0.162200       0.576000
57682     57682     hunan          113.5597       28.7097          125       174     2012      02        16        047              0.266958       3.985291       0.125478       0.317767   -9999.000000   -9999.000000       0.159500   -9999.000000
57682     57682     hunan          113.5597       28.7097          125       174     2012      02        17        048              0.261958       3.565033       0.000000       0.315429       0.178000   -9999.000000   -9999.000000   -9999.000000
57682     57682     hunan          113.5597       28.7097          125       174     2012      02        18        049              0.256875       6.482178       0.000000       0.312269   -9999.000000       0.082100   -9999.000000       0.287000
57682     57682     hunan          113.5597       28.7097          125       174     2012      02        19        050              0.252375       5.073151       0.282521       0.311080       0.148500   -9999.000000       0.123000   -9999.000000
57682     57682     hunan          113.5597       28.7097          125       174     2012      02        20        051              0.251583       7.977539       0.986432       0.309450   -9999.000000       0.210300       0.081700       0.306000
57682     57682     hunan          113.5597       28.7097          125       174     2012      02        21        052              0.277125       6.283020      11.296201       0.312617   -9999.000000   -9999.000000   -9999.000000   -9999.000000
57682     57682     hunan          113.5597       28.7097          125       174     2012      02        22        053              0.287792       7.046112       4.673067       0.330756       0.117000       0.389500   -9999.000000       0.545000
57682     57682     hunan          113.5597       28.7097          125       174     2012      02        23        054              0.293083       7.288757       8.674190       0.329176       0.166500       0.106300   -9999.000000       0.620000
57682     57682     hunan          113.5597       28.7097          125       174     2012      02        24        055              0.283125       7.364502       0.549181       0.333333       0.138000   -9999.000000   -9999.000000   -9999.000000
57682     57682     hunan          113.5597       28.7097          125       174     2012      02        25        056              0.275167       5.355957       1.863534       0.323327       0.179000       0.294700       0.089700       0.461000
57682     57682     hunan          113.5597       28.7097          125       174     2012      02        26        057              0.269167       3.821533       3.929657       0.322465   -9999.000000       0.182200       0.078500   -9999.000000
57682     57682     hunan          113.5597       28.7097          125       174     2012      02        27        058              0.264000       3.691833       0.366169       0.318483   -9999.000000       0.405200   -9999.000000       0.397000
57682     57682     hunan          113.5597       28.7097          125       174     2012      02        28        059              0.259917       4.652222       0.638352       0.317446       0.143000       0.353400   -9999.000000       0.496000
57682     57682     hunan          113.5597       28.7097          125       174     2012      02        29        060              0.000000   -9999.000000       0.994371   -9999.000000   -9999.000000   -9999.000000   -9999.000000   -9999.000000
57682     57682     hunan          113.5597       28.7097          125       174     2012      03        01        061              0.272250       7.610657       9.095098       0.316037   -9999.000000       0.153900       0.108100       0.266000
57682     57682     hunan          113.5597       28.7097          125       174     2012      03        02        062              0.295667       6.876770      15.154282       0.324295   -9999.000000       0.164700       0.086000   -9999.000000
57682     57682     hunan          113.5597       28.7097          125       174     2012      03        03        063              0.302042       6.219666      35.127594       0.341783   -9999.000000   -9999.000000       0.088500       0.797000
57682     57682     hunan          113.5597       28.7097          125       174     2012      03        04        064              0.303167       6.212708      20.176228       0.364203   -9999.000000       0.654000       0.101300   -9999.000000
57682     57682     hunan          113.5597       28.7097          125       174     2012      03        05        065              0.282375       5.333221       0.000000       0.397192   -9999.000000   -9999.000000   -9999.000000       0.515000
57682     57682     hunan          113.5597       28.7097          125       174     2012      03        06        066              0.272417       6.161530       1.121154       0.370885   -9999.000000       0.754900   -9999.000000       0.588000
57682     57682     hunan          113.5597       28.7097          125       174     2012      03        07        067              0.000000       6.917297       5.301869       0.342181   -9999.000000       0.367300       0.085000   -9999.000000
57682     57682     hunan          113.5597       28.7097          125       174     2012      03        08        068              0.294333       6.896423       9.130870       0.340194   -9999.000000   -9999.000000       0.103900       0.747000
57682     57682     hunan          113.5597       28.7097          125       174     2012      03        09        069              0.282167       5.810303       0.129272       0.344326   -9999.000000       0.324500       0.094000   -9999.000000
57682     57682     hunan          113.5597       28.7097          125       174     2012      03        10        070              0.270417       5.406769       0.000000       0.335253   -9999.000000   -9999.000000   -9999.000000       0.369000
57682     57682     hunan          113.5597       28.7097          125       174     2012      03        11        071              0.263875       8.213104       0.000000       0.330319       0.198000       0.532000   -9999.000000       0.498000
57682     57682     hunan          113.5597       28.7097          125       174     2012      03        12        072              0.258958       9.730865       0.000000       0.326598   -9999.000000       0.377700   -9999.000000   -9999.000000
57682     57682     hunan          113.5597       28.7097          125       174     2012      03        13        073              0.255875       8.123505       0.000000       0.324930   -9999.000000   -9999.000000       0.071900       0.399000
57682     57682     hunan          113.5597       28.7097          125       174     2012      03        14        074              0.253875      11.679413       3.196189       0.321593       0.125000       0.142400       0.083600   -9999.000000
57682     57682     hunan          113.5597       28.7097          125       174     2012      03        15        075              0.272875      10.719116       0.731826       0.323765       0.166000       0.094900       0.085300       0.676000
57682     57682     hunan          113.5597       28.7097          125       174     2012      03        16        076              0.266292      10.836975       0.000000       0.326522       0.168500       0.163300   -9999.000000   -9999.000000
57682     57682     hunan          113.5597       28.7097          125       174     2012      03        17        077              0.262083      10.566284       1.417396       0.322052       0.179000       0.284700   -9999.000000   -9999.000000
57682     57682     hunan          113.5597       28.7097          125       174     2012      03        18        078              0.279333      11.363831       9.960370       0.323143   -9999.000000   -9999.000000       0.089300       0.763000
57682     57682     hunan          113.5597       28.7097          125       174     2012      03        19        079              0.287000      14.344391       0.323774       0.331664       0.141000       0.661600       0.122100   -9999.000000
57682     57682     hunan          113.5597       28.7097          125       174     2012      03        20        080              0.276417      11.087769       0.224623       0.328187       0.138000   -9999.000000       0.126800       0.438000
57682     57682     hunan          113.5597       28.7097          125       174     2012      03        21        081              0.270000       8.325439       0.057537       0.322596       0.151500   -9999.000000       0.105100   -9999.000000
57682     57682     hunan          113.5597       28.7097          125       174     2012      03        22        082              0.282542       9.582642      22.383516       0.320806       0.201000       0.666800   -9999.000000       0.593000
57682     57682     hunan          113.5597       28.7097          125       174     2012      03        23        083              0.287083       8.166046       0.212077       0.340005   -9999.000000   -9999.000000   -9999.000000       0.778000
57682     57682     hunan          113.5597       28.7097          125       174     2012      03        24        084              0.269125      11.363464       0.000000       0.333839   -9999.000000       0.321900   -9999.000000   -9999.000000
57682     57682     hunan          113.5597       28.7097          125       174     2012      03        25        085              0.000000      13.383636       0.000000       0.322530       0.120500   -9999.000000       0.101700       0.385000
57682     57682     hunan          113.5597       28.7097          125       174     2012      03        26        086              0.254667      15.473419       0.000000       0.318575       0.124000   -9999.000000       0.140400   -9999.000000
57682     57682     hunan          113.5597       28.7097          125       174     2012      03        27        087              0.249042      16.980469       0.000000       0.315658       0.127000       0.253300   -9999.000000       0.353000
57682     57682     hunan          113.5597       28.7097          125       174     2012      03        28        088              0.245458      18.880463       0.642560       0.313339   -9999.000000   -9999.000000   -9999.000000       0.553000
57682     57682     hunan          113.5597       28.7097          125       174     2012      03        29        089              0.260042      18.867188      18.442326       0.313562   -9999.000000       0.282500   -9999.000000   -9999.000000
57682     57682     hunan          113.5597       28.7097          125       174     2012      03        30        090              0.296625      16.892029      13.087635       0.332491       0.138500       0.378300       0.137500       0.445000
57682     57682     hunan          113.5597       28.7097          125       174     2012      03        31        091              0.273500      14.756836       0.000000       0.344571       0.152000   -9999.000000       0.152700   -9999.000000
57682     57682     hunan          113.5597       28.7097          125       174     2012      04        01        092              0.260375      16.535828       0.000000       0.323532       0.167500       0.248200       0.142100       0.408000
57682     57682     hunan          113.5597       28.7097          125       174     2012      04        02        093              0.251542      18.073273       0.000000       0.317717       0.182000   -9999.000000   -9999.000000   -9999.000000
57682     57682     hunan          113.5597       28.7097          125       174     2012      04        03        094              0.242375      20.500183       0.000000       0.314231   -9999.000000       0.267900   -9999.000000       0.382000
57682     57682     hunan          113.5597       28.7097          125       174     2012      04        04        095              0.285250      18.201538      13.700837       0.311626       0.137000       0.228100       0.126900       0.665000
57682     57682     hunan          113.5597       28.7097          125       174     2012      04        05        096              0.276000      13.907806       0.048978       0.336067       0.166000   -9999.000000       0.120400   -9999.000000
57682     57682     hunan          113.5597       28.7097          125       174     2012      04        06        097              0.264625      16.317841       0.026104       0.322110       0.173000       0.395300       0.113300       0.509000
57682     57682     hunan          113.5597       28.7097          125       174     2012      04        07        098              0.258458      17.560028       0.477003       0.318074       0.196000       0.314100       0.128100   -9999.000000
57682     57682     hunan          113.5597       28.7097          125       174     2012      04        08        099              0.253833      19.303650       0.317439       0.315979   -9999.000000   -9999.000000   -9999.000000       0.345000
57682     57682     hunan          113.5597       28.7097          125       174     2012      04        09        100              0.251167      17.198914       0.000000       0.316305       0.124000       0.340600   -9999.000000       0.387000
57682     57682     hunan          113.5597       28.7097          125       174     2012      04        10        101              0.279667      17.750122       7.812885       0.315393       0.159000   -9999.000000       0.091400   -9999.000000
57682     57682     hunan          113.5597       28.7097          125       174     2012      04        11        102              0.277958      18.184845       1.787078       0.328590       0.209500       0.523100       0.104600       0.854000
57682     57682     hunan          113.5597       28.7097          125       174     2012      04        12        103              0.288625      18.655518      22.020638       0.322679   -9999.000000   -9999.000000       0.125400   -9999.000000
57682     57682     hunan          113.5597       28.7097          125       174     2012      04        13        104              0.273792      16.985474       0.935964       0.346749   -9999.000000   -9999.000000   -9999.000000       0.476000
57682     57682     hunan          113.5597       28.7097          125       174     2012      04        14        105              0.288917      17.793701       6.267903       0.325964   -9999.000000       0.459800   -9999.000000   -9999.000000
57682     57682     hunan          113.5597       28.7097          125       174     2012      04        15        106              0.294208      15.023499      22.883564       0.333356       0.214500   -9999.000000       0.120300   -9999.000000
57682     57682     hunan          113.5597       28.7097          125       174     2012      04        16        107              0.273500      14.086334       0.420729       0.350352       0.201500   -9999.000000       0.162700       0.640000
57682     57682     hunan          113.5597       28.7097          125       174     2012      04        17        108              0.271375      17.688019       1.191755       0.330955       0.228500   -9999.000000       0.171200   -9999.000000
57682     57682     hunan          113.5597       28.7097          125       174     2012      04        18        109              0.268000      16.522217       0.967046       0.329862   -9999.000000   -9999.000000   -9999.000000       0.488000
57682     57682     hunan          113.5597       28.7097          125       174     2012      04        19        110              0.262917      17.609344       0.346485       0.325732   -9999.000000       0.287700   -9999.000000   -9999.000000
57682     57682     hunan          113.5597       28.7097          125       174     2012      04        20        111              0.286542      21.000427       4.361054       0.321493   -9999.000000       0.224400   -9999.000000       0.438000
57682     57682     hunan          113.5597       28.7097          125       174     2012      04        21        112              0.273375      17.700500       0.293848       0.328825       0.190000       0.239000       0.161000       0.702000
57682     57682     hunan          113.5597       28.7097          125       174     2012      04        22        113              0.261750      20.068298       0.461390       0.319812       0.197000       0.268800       0.198700   -9999.000000
57682     57682     hunan          113.5597       28.7097          125       174     2012      04        23        114              0.259167      21.980499       6.278614       0.314644       0.228000   -9999.000000       0.280000       0.376000
57682     57682     hunan          113.5597       28.7097          125       174     2012      04        24        115              0.296000      21.895447       1.589942       0.320200   -9999.000000   -9999.000000       0.244100   -9999.000000
57682     57682     hunan          113.5597       28.7097          125       174     2012      04        25        116              0.000000      21.734650       5.655957       0.325749   -9999.000000   -9999.000000   -9999.000000       0.526000
57682     57682     hunan          113.5597       28.7097          125       174     2012      04        26        117              0.270875      18.042755       0.000000       0.328394       0.176000   -9999.000000   -9999.000000       0.611000
57682     57682     hunan          113.5597       28.7097          125       174     2012      04        27        118              0.259958      21.057556       0.000000       0.315995       0.191500       0.437400   -9999.000000   -9999.000000
57682     57682     hunan          113.5597       28.7097          125       174     2012      04        28        119              0.284583      22.370880      42.129101       0.312366       0.234000   -9999.000000       0.351000       0.833000
57682     57682     hunan          113.5597       28.7097          125       174     2012      04        29        120              0.286583      22.536255       1.054443       0.354982   -9999.000000       0.800500       0.330000   -9999.000000
57682     57682     hunan          113.5597       28.7097          125       174     2012      04        30        121              0.301083      22.991730      44.968315       0.333162       0.185000       0.284000   -9999.000000       1.000000
57682     57682     hunan          113.5597       28.7097          125       174     2012      05        01        122              0.286792      21.117798      12.239581       0.369876       0.210000   -9999.000000   -9999.000000   -9999.000000
57682     57682     hunan          113.5597       28.7097          125       174     2012      05        02        123              0.276500      20.822205       3.656636       0.362970       0.251500       0.578100       0.197700       0.567000
57682     57682     hunan          113.5597       28.7097          125       174     2012      05        03        124              0.289625      21.843201      12.262308       0.353227       0.367000   -9999.000000       0.171400       1.000000
57682     57682     hunan          113.5597       28.7097          125       174     2012      05        04        125              0.275292      20.485413       3.256262       0.353086   -9999.000000   -9999.000000       0.155100   -9999.000000
57682     57682     hunan          113.5597       28.7097          125       174     2012      05        05        126              0.265708      22.976471       0.177832       0.338689   -9999.000000   -9999.000000       0.167500       0.539000
57682     57682     hunan          113.5597       28.7097          125       174     2012      05        06        127              0.256917      24.582550       0.000000       0.332277       0.208000   -9999.000000   -9999.000000   -9999.000000
57682     57682     hunan          113.5597       28.7097          125       174     2012      05        07        128              0.247875      26.071014       0.000000       0.326300   -9999.000000       0.382900   -9999.000000       0.539000
57682     57682     hunan          113.5597       28.7097          125       174     2012      05        08        129              0.275125      27.362885      10.248047       0.320195       0.243000   -9999.000000       0.136100       0.561000
57682     57682     hunan          113.5597       28.7097          125       174     2012      05        09        130              0.302542      26.122528      22.505760       0.331391   -9999.000000       0.559700       0.218500   -9999.000000
57682     57682     hunan          113.5597       28.7097          125       174     2012      05        10        131              0.287250      24.255676       2.203061       0.351243   -9999.000000       0.503100       0.180400       0.878000
57682     57682     hunan          113.5597       28.7097          125       174     2012      05        11        132              0.280750      23.486694      38.680233       0.335286   -9999.000000   -9999.000000   -9999.000000   -9999.000000
57682     57682     hunan          113.5597       28.7097          125       174     2012      05        12        133              0.305458      25.962616      47.258415       0.350488       0.297500       0.610100   -9999.000000       0.940000
57682     57682     hunan          113.5597       28.7097          125       174     2012      05        13        134              0.288750      22.003632      11.867523       0.529080       0.439000   -9999.000000   -9999.000000   -9999.000000
57682     57682     hunan          113.5597       28.7097          125       174     2012      05        14        135              0.300833      21.010681       8.001160       0.414996       0.377000   -9999.000000       0.153500   -9999.000000
57682     57682     hunan          113.5597       28.7097          125       174     2012      05        15        136              0.278042      19.340881       2.866813       0.405161   -9999.000000       0.399900       0.159100       0.685000
57682     57682     hunan          113.5597       28.7097          125       174     2012      05        16        137              0.268708      21.415070       0.023493       0.355267       0.198000   -9999.000000       0.167000   -9999.000000
57682     57682     hunan          113.5597       28.7097          125       174     2012      05        17        138              0.258708      23.522095       0.523639       0.337106       0.265500       0.326100   -9999.000000       0.566000
57682     57682     hunan          113.5597       28.7097          125       174     2012      05        18        139              0.248958      25.962006      11.567189       0.329699       0.272000       0.291500   -9999.000000   -9999.000000
57682     57682     hunan          113.5597       28.7097          125       174     2012      05        19        140              0.283458      25.787598      11.897264       0.333770       0.356000   -9999.000000       0.174900       0.551000
57682     57682     hunan          113.5597       28.7097          125       174     2012      05        20        141              0.267500      23.127167       0.000000       0.342993   -9999.000000       0.511600       0.141900       0.721000
57682     57682     hunan          113.5597       28.7097          125       174     2012      05        21        142              0.255042      24.039673       0.181793       0.327029       0.277000   -9999.000000       0.181100   -9999.000000
57682     57682     hunan          113.5597       28.7097          125       174     2012      05        22        143              0.284792      24.115265      40.514633       0.322272       0.423000       0.359900       0.119100       0.909000
57682     57682     hunan          113.5597       28.7097          125       174     2012      05        23        144              0.302708      22.006378      18.593555       0.356555   -9999.000000       0.213600   -9999.000000   -9999.000000
57682     57682     hunan          113.5597       28.7097          125       174     2012      05        24        145              0.303000      21.358612      35.285572       0.354122       0.500000   -9999.000000   -9999.000000       1.000000
57682     57682     hunan          113.5597       28.7097          125       174     2012      05        25        146              0.000000      20.227905      25.620056       0.384592   -9999.000000       0.208500       0.165300       1.000000
57682     57682     hunan          113.5597       28.7097          125       174     2012      05        26        147              0.290208      20.442749       1.151083       0.428510   -9999.000000   -9999.000000       0.138100   -9999.000000
57682     57682     hunan          113.5597       28.7097          125       174     2012      05        27        148              0.277875      22.128387      10.046062       0.379022       0.380500       0.189100       0.160600       1.000000
57682     57682     hunan          113.5597       28.7097          125       174     2012      05        28        149              0.281875      24.152649       1.671854       0.348401       0.380000       0.303600   -9999.000000   -9999.000000
57682     57682     hunan          113.5597       28.7097          125       174     2012      05        29        150              0.289417      24.368256      18.914949       0.340759       0.418000   -9999.000000   -9999.000000       0.966000
57682     57682     hunan          113.5597       28.7097          125       174     2012      05        30        151              0.281000      23.573425       0.931913       0.351473       0.409000       0.424400   -9999.000000   -9999.000000
57682     57682     hunan          113.5597       28.7097          125       174     2012      05        31        152              0.269583      23.638885       4.406980       0.337465   -9999.000000   -9999.000000   -9999.000000   -9999.000000
57682     57682     hunan          113.5597       28.7097          125       174     2012      06        01        153              0.272375      24.699615       4.314987       0.334938       0.282000       0.275000       0.180400       0.840000
57682     57682     hunan          113.5597       28.7097          125       174     2012      06        02        154              0.270625      21.877106       0.018186       0.337907       0.373500       0.219700       0.145300   -9999.000000
57682     57682     hunan          113.5597       28.7097          125       174     2012      06        03        155              0.268417      23.429138      10.716724       0.328278   -9999.000000   -9999.000000   -9999.000000       0.877000
57682     57682     hunan          113.5597       28.7097          125       174     2012      06        04        156              0.298042      22.898987      16.083010       0.337277   -9999.000000       0.297300   -9999.000000   -9999.000000
57682     57682     hunan          113.5597       28.7097          125       174     2012      06        05        157              0.282875      22.337372       3.307636       0.348552   -9999.000000       0.233900       0.205600       0.789000
57682     57682     hunan          113.5597       28.7097          125       174     2012      06        06        158              0.289417      23.914368       5.444940       0.335359       0.324000   -9999.000000       0.137600       0.980000
57682     57682     hunan          113.5597       28.7097          125       174     2012      06        07        159              0.294917      24.379669       7.145674       0.338015       0.389000       0.424600       0.123800   -9999.000000
57682     57682     hunan          113.5597       28.7097          125       174     2012      06        08        160              0.279875      25.410522       0.449217       0.340399       0.387500   -9999.000000       0.153700       0.696000
57682     57682     hunan          113.5597       28.7097          125       174     2012      06        09        161              0.275083      26.944885       3.388070       0.329392       0.440000   -9999.000000   -9999.000000   -9999.000000
57682     57682     hunan          113.5597       28.7097          125       174     2012      06        10        162              0.300250      28.510864      77.250137       0.330895   -9999.000000       0.343900   -9999.000000       0.959000
57682     57682     hunan          113.5597       28.7097          125       174     2012      06        11        163              0.000000      25.938965       6.440965       0.464121       0.299000   -9999.000000       0.187900   -9999.000000
57682     57682     hunan          113.5597       28.7097          125       174     2012      06        12        164              0.276375      25.714966       0.592274       0.413926       0.353000       0.501700       0.178200   -9999.000000
57682     57682     hunan          113.5597       28.7097          125       174     2012      06        13        165              0.268167      26.877258       1.157779       0.351156       0.371000   -9999.000000       0.189900       0.679000
57682     57682     hunan          113.5597       28.7097          125       174     2012      06        14        166              0.262833      28.148376       0.465144       0.336686       0.381500       0.359700   -9999.000000   -9999.000000
57682     57682     hunan          113.5597       28.7097          125       174     2012      06        15        167              0.256708      26.680481       0.690130       0.330811   -9999.000000       0.361400   -9999.000000       0.513000
57682     57682     hunan          113.5597       28.7097          125       174     2012      06        16        168              0.249292      27.633667       0.000000       0.323985   -9999.000000   -9999.000000   -9999.000000   -9999.000000
57682     57682     hunan          113.5597       28.7097          125       174     2012      06        17        169              0.242583      26.441467       0.000000       0.318520       0.334500       0.467200       0.168100       0.454000
57682     57682     hunan          113.5597       28.7097          125       174     2012      06        18        170              0.236250      27.402710       0.000000       0.314830       0.337500       0.604600       0.214200       0.527000
57682     57682     hunan          113.5597       28.7097          125       174     2012      06        19        171              0.231292      27.400970       0.000000       0.311726       0.355000       0.237400       0.210100   -9999.000000
57682     57682     hunan          113.5597       28.7097          125       174     2012      06        20        172              0.227750      28.303101       0.000000       0.308783       0.346000       0.423700   -9999.000000       0.315000
57682     57682     hunan          113.5597       28.7097          125       174     2012      06        21        173              0.225125      28.912628       0.865050       0.306278   -9999.000000   -9999.000000   -9999.000000   -9999.000000
57682     57682     hunan          113.5597       28.7097          125       174     2012      06        22        174              0.223375      29.070007       1.800259       0.305689       0.234000   -9999.000000       0.202500       0.494000
57682     57682     hunan          113.5597       28.7097          125       174     2012      06        23        175              0.221083      27.673492       0.000000       0.306506       0.327000       0.364600       0.207800       0.491000
57682     57682     hunan          113.5597       28.7097          125       174     2012      06        24        176              0.218792      27.688873       3.288952       0.301171       0.341000   -9999.000000       0.203500   -9999.000000
57682     57682     hunan          113.5597       28.7097          125       174     2012      06        25        177              0.239208      28.655975      20.735382       0.300103   -9999.000000       0.415100       0.175400       0.622000
57682     57682     hunan          113.5597       28.7097          125       174     2012      06        26        178              0.299333      27.539490      29.594339       0.346175   -9999.000000   -9999.000000   -9999.000000   -9999.000000
57682     57682     hunan          113.5597       28.7097          125       174     2012      06        27        179              0.302042      27.196136      38.046200       0.351866   -9999.000000       0.357100   -9999.000000       1.000000
57682     57682     hunan          113.5597       28.7097          125       174     2012      06        28        180              0.293958      27.694336       6.094251       0.363813       0.363500       0.318800       0.165000   -9999.000000
57682     57682     hunan          113.5597       28.7097          125       174     2012      06        29        181              0.278667      28.437378       1.277274       0.341862       0.350500   -9999.000000       0.152600   -9999.000000
57682     57682     hunan          113.5597       28.7097          125       174     2012      06        30        182              0.281375      30.412201       7.588267       0.328669       0.413000       0.282100       0.164900   -9999.000000
57682     57682     hunan          113.5597       28.7097          125       174     2012      07        01        183              0.274250      30.311951       0.000000       0.333046   -9999.000000   -9999.000000   -9999.000000   -9999.000000
57682     57682     hunan          113.5597       28.7097          125       174     2012      07        02        184              0.261333      29.558075       0.000000       0.322505   -9999.000000       0.258800   -9999.000000       0.583000
57682     57682     hunan          113.5597       28.7097          125       174     2012      07        03        185              0.249125      29.573486       1.267146       0.316299       0.346500       0.343600       0.283600   -9999.000000
57682     57682     hunan          113.5597       28.7097          125       174     2012      07        04        186              0.239542      29.962067       0.607142       0.314756       0.358500   -9999.000000       0.255800       0.383000
57682     57682     hunan          113.5597       28.7097          125       174     2012      07        05        187              0.232292      30.225220       0.000000       0.311654       0.462000       0.394200       0.263300       0.549000
57682     57682     hunan          113.5597       28.7097          125       174     2012      07        06        188              0.227542      30.239990       0.690649       0.307718   -9999.000000       0.489500       0.235900   -9999.000000
57682     57682     hunan          113.5597       28.7097          125       174     2012      07        07        189              0.222875      30.716034       0.943238       0.306084   -9999.000000   -9999.000000   -9999.000000       0.694000
57682     57682     hunan          113.5597       28.7097          125       174     2012      07        08        190              0.219208      30.206726       0.530021       0.303390       0.244000       0.346500   -9999.000000   -9999.000000
57682     57682     hunan          113.5597       28.7097          125       174     2012      07        09        191              0.216875      30.283112       0.000000       0.299937       0.367500   -9999.000000       0.212800       0.465000
57682     57682     hunan          113.5597       28.7097          125       174     2012      07        10        192              0.214458      30.202850       0.000000       0.296757       0.382000       0.219300       0.210100   -9999.000000
57682     57682     hunan          113.5597       28.7097          125       174     2012      07        11        193              0.212417      30.282806       0.743024       0.293613       0.422000       0.552300       0.235300   -9999.000000
57682     57682     hunan          113.5597       28.7097          125       174     2012      07        12        194              0.210625      30.480103       0.595427       0.293716   -9999.000000   -9999.000000       0.175200       0.252000
57682     57682     hunan          113.5597       28.7097          125       174     2012      07        13        195              0.210083      30.311584      10.859921       0.292000   -9999.000000       0.355400   -9999.000000   -9999.000000
57682     57682     hunan          113.5597       28.7097          125       174     2012      07        14        196              0.216125      28.729340       5.711448       0.313006       0.378000   -9999.000000   -9999.000000       0.328000
57682     57682     hunan          113.5597       28.7097          125       174     2012      07        15        197              0.216375      28.167267       1.581994       0.322043       0.382500       0.260400       0.217100   -9999.000000
57682     57682     hunan          113.5597       28.7097          125       174     2012      07        16        198              0.283292      29.036743      44.387016       0.309545   -9999.000000       0.179300       0.317700       0.884000
57682     57682     hunan          113.5597       28.7097          125       174     2012      07        17        199              0.300667      26.878693      13.853643       0.356287   -9999.000000   -9999.000000       0.319500       0.886000
57682     57682     hunan          113.5597       28.7097          125       174     2012      07        18        200              0.282833      27.681488       2.272612       0.347918   -9999.000000       0.313000   -9999.000000   -9999.000000
57682     57682     hunan          113.5597       28.7097          125       174     2012      07        19        201              0.272000      28.427063       2.580680       0.329151       0.376000   -9999.000000   -9999.000000       0.518000
57682     57682     hunan          113.5597       28.7097          125       174     2012      07        20        202              0.264208      28.621704       0.156356       0.324179       0.375500       0.321400       0.362200   -9999.000000
57682     57682     hunan          113.5597       28.7097          125       174     2012      07        21        203              0.253609      30.479004       0.152107       0.314308       0.370500       0.350400       0.323800       0.402000
57682     57682     hunan          113.5597       28.7097          125       174     2012      07        22        204              0.243667      31.407898       0.755302       0.309129       0.405000   -9999.000000       0.418600       0.549000
57682     57682     hunan          113.5597       28.7097          125       174     2012      07        23        205              0.235083      31.493286       8.720203       0.307569   -9999.000000       0.504900       0.240200   -9999.000000
57682     57682     hunan          113.5597       28.7097          125       174     2012      07        24        206              0.230292      30.053070       2.789397       0.321597       0.220000       0.527500   -9999.000000       0.755000
57682     57682     hunan          113.5597       28.7097          125       174     2012      07        25        207              0.228167      29.557312       1.627211       0.317748       0.331000       0.431800   -9999.000000   -9999.000000
57682     57682     hunan          113.5597       28.7097          125       174     2012      07        26        208              0.223208      30.493683       0.929890       0.312045       0.350000       0.331900       0.295100       0.440000
57682     57682     hunan          113.5597       28.7097          125       174     2012      07        27        209              0.219375      30.463562       6.091624       0.306888       0.433000   -9999.000000       0.302400   -9999.000000
57682     57682     hunan          113.5597       28.7097          125       174     2012      07        28        210              0.217000      30.118317       1.142165       0.315583   -9999.000000       0.409100       0.317200       0.357000
57682     57682     hunan          113.5597       28.7097          125       174     2012      07        29        211              0.216583      30.411072       0.360510       0.309993       0.224000       0.292000   -9999.000000       0.456000
57682     57682     hunan          113.5597       28.7097          125       174     2012      07        30        212              0.216708      31.055237       0.811110       0.303064       0.300500   -9999.000000   -9999.000000   -9999.000000
57682     57682     hunan          113.5597       28.7097          125       174     2012      07        31        213              0.215583      31.348419       0.000000       0.300485       0.330000       0.403200   -9999.000000       0.467000
57682     57682     hunan          113.5597       28.7097          125       174     2012      08        01        214              0.212458      31.723053       0.847874       0.296154       0.398500   -9999.000000       0.257200   -9999.000000
57682     57682     hunan          113.5597       28.7097          125       174     2012      08        02        215              0.209958      31.309692       0.000000       0.293164   -9999.000000       0.286300       0.328300       0.207000
57682     57682     hunan          113.5597       28.7097          125       174     2012      08        03        216              0.207833      29.962738       1.009946       0.287622   -9999.000000   -9999.000000       0.262200       0.426000
57682     57682     hunan          113.5597       28.7097          125       174     2012      08        04        217              0.241208      29.339600      13.257078       0.284875       0.272000   -9999.000000   -9999.000000   -9999.000000
57682     57682     hunan          113.5597       28.7097          125       174     2012      08        05        218              0.250625      27.563538       1.998607       0.319500       0.370000       0.215000   -9999.000000       0.592000
57682     57682     hunan          113.5597       28.7097          125       174     2012      08        06        219              0.237750      28.331085       6.629471       0.307997       0.255000   -9999.000000       0.236600   -9999.000000
57682     57682     hunan          113.5597       28.7097          125       174     2012      08        07        220              0.226042      28.919464       0.136740       0.316800       0.464000       0.301100       0.209400       0.310000
57682     57682     hunan          113.5597       28.7097          125       174     2012      08        08        221              0.218417      29.664276       0.000000       0.301666   -9999.000000       0.117900       0.221700   -9999.000000
57682     57682     hunan          113.5597       28.7097          125       174     2012      08        09        222              0.240958      29.559937       6.602550       0.294474       0.281000   -9999.000000       0.173800   -9999.000000
57682     57682     hunan          113.5597       28.7097          125       174     2012      08        10        223              0.279292      28.900391       7.397672       0.307073       0.375000       0.415200   -9999.000000       0.750000
57682     57682     hunan          113.5597       28.7097          125       174     2012      08        11        224              0.284083      27.279694       8.447823       0.320564       0.377500       0.227300   -9999.000000   -9999.000000
57682     57682     hunan          113.5597       28.7097          125       174     2012      08        12        225              0.294250      27.879578      15.157604       0.324515       0.299000       0.236300       0.203200       0.630000
57682     57682     hunan          113.5597       28.7097          125       174     2012      08        13        226              0.275958      27.616699       2.185856       0.338449   -9999.000000       0.432500       0.284500   -9999.000000
57682     57682     hunan          113.5597       28.7097          125       174     2012      08        14        227              0.272292      28.810974       1.407515       0.320912   -9999.000000   -9999.000000       0.231100       0.482000
57682     57682     hunan          113.5597       28.7097          125       174     2012      08        15        228              0.266625      29.024658       0.375120       0.313382       0.367000       0.244400   -9999.000000       0.565000
57682     57682     hunan          113.5597       28.7097          125       174     2012      08        16        229              0.256708      29.839905       0.000000       0.306231       0.366500       0.449800   -9999.000000   -9999.000000
57682     57682     hunan          113.5597       28.7097          125       174     2012      08        17        230              0.249333      30.769562      12.483119       0.300493       0.361500   -9999.000000   -9999.000000       0.618000
57682     57682     hunan          113.5597       28.7097          125       174     2012      08        18        231              0.244333      30.375946       2.552334       0.321819       0.406000       0.249500       0.203100   -9999.000000
57682     57682     hunan          113.5597       28.7097          125       174     2012      08        19        232              0.235708      31.112030       3.016838       0.307942   -9999.000000   -9999.000000       0.215100       0.441000
57682     57682     hunan          113.5597       28.7097          125       174     2012      08        20        233              0.228958      31.314575       1.586731       0.300053       0.242000       0.459900       0.157600       0.428000
57682     57682     hunan          113.5597       28.7097          125       174     2012      08        21        234              0.278000      31.015686      27.735901       0.295349       0.287000       0.117800   -9999.000000   -9999.000000
57682     57682     hunan          113.5597       28.7097          125       174     2012      08        22        235              0.280625      27.331665       5.376091       0.360865       0.411000   -9999.000000   -9999.000000   -9999.000000
57682     57682     hunan          113.5597       28.7097          125       174     2012      08        23        236              0.280708      23.942963       5.949265       0.327556       0.495000       0.217700       0.181900   -9999.000000
57682     57682     hunan          113.5597       28.7097          125       174     2012      08        24        237              0.272667      23.516052       0.000000       0.326580   -9999.000000   -9999.000000       0.176100       0.375000
57682     57682     hunan          113.5597       28.7097          125       174     2012      08        25        238              0.000000      25.305389       0.000000       0.313517   -9999.000000       0.232600       0.168500   -9999.000000
57682     57682     hunan          113.5597       28.7097          125       174     2012      08        26        239              0.255000      26.840637      12.052714       0.307719       0.372500       0.191500       0.164500       0.614000
57682     57682     hunan          113.5597       28.7097          125       174     2012      08        27        240              0.250000      27.615723       0.876188       0.330696       0.381000   -9999.000000   -9999.000000       0.586000
57682     57682     hunan          113.5597       28.7097          125       174     2012      08        28        241              0.245500      26.458405       0.000000       0.315366       0.377500       0.263100   -9999.000000   -9999.000000
57682     57682     hunan          113.5597       28.7097          125       174     2012      08        29        242              0.237000      27.534454       0.000000       0.307624       0.333000       0.237200       0.211700       0.333000
57682     57682     hunan          113.5597       28.7097          125       174     2012      08        30        243              0.230125      28.477051       1.378125       0.302818   -9999.000000       0.331800       0.208300   -9999.000000
57682     57682     hunan          113.5597       28.7097          125       174     2012      08        31        244              0.225042      28.933167       0.000000       0.301882       0.274000       0.303600       0.190800       0.257000
57682     57682     hunan          113.5597       28.7097          125       174     2012      09        01        245              0.221125      29.753510       0.319170       0.297516       0.352500   -9999.000000   -9999.000000       0.647000
57682     57682     hunan          113.5597       28.7097          125       174     2012      09        02        246              0.218542      30.391571      11.323699       0.296149       0.484000       0.292200   -9999.000000   -9999.000000
57682     57682     hunan          113.5597       28.7097          125       174     2012      09        03        247              0.228083      27.562439       7.038826       0.310189       0.433000       0.209200       0.225100       0.439000
57682     57682     hunan          113.5597       28.7097          125       174     2012      09        04        248              0.227083      24.788971       0.757516       0.326989   -9999.000000   -9999.000000       0.172200   -9999.000000
57682     57682     hunan          113.5597       28.7097          125       174     2012      09        05        249              0.220417      25.485229       0.398991       0.309805       0.267000       0.505900       0.227800       0.187000
57682     57682     hunan          113.5597       28.7097          125       174     2012      09        06        250              0.215917      26.007202       1.212090       0.302325       0.358500   -9999.000000       0.170600   -9999.000000
57682     57682     hunan          113.5597       28.7097          125       174     2012      09        07        251              0.213292      27.025665       0.535762       0.298417       0.366000       0.240400   -9999.000000   -9999.000000
57682     57682     hunan          113.5597       28.7097          125       174     2012      09        08        252              0.210833      28.667297       1.502540       0.295805       0.377000       0.235900   -9999.000000       0.632000
57682     57682     hunan          113.5597       28.7097          125       174     2012      09        09        253              0.208625      28.414886       2.764981       0.294811   -9999.000000   -9999.000000       0.184800   -9999.000000
57682     57682     hunan          113.5597       28.7097          125       174     2012      09        10        254              0.214458      24.732635       0.397582       0.304933   -9999.000000       0.225000       0.313200       0.323000
57682     57682     hunan          113.5597       28.7097          125       174     2012      09        11        255              0.215625      25.764832      20.461790       0.300391       0.198000   -9999.000000       0.254300   -9999.000000
57682     57682     hunan          113.5597       28.7097          125       174     2012      09        12        256              0.213625      28.237610       9.528872       0.311358       0.448000   -9999.000000       0.224500       0.423000
57682     57682     hunan          113.5597       28.7097          125       174     2012      09        13        257              0.219792      23.203247       2.630183       0.335858       0.306000       0.441200   -9999.000000       0.662000
57682     57682     hunan          113.5597       28.7097          125       174     2012      09        14        258              0.218333      20.511322       2.154809       0.326506       0.316000   -9999.000000   -9999.000000   -9999.000000
57682     57682     hunan          113.5597       28.7097          125       174     2012      09        15        259              0.215292      21.978149       0.493765       0.315422   -9999.000000       0.387800       0.246300       0.166000
57682     57682     hunan          113.5597       28.7097          125       174     2012      09        16        260              0.215167      21.773224       0.000000       0.306738       0.182000       0.184000       0.317700   -9999.000000
57682     57682     hunan          113.5597       28.7097          125       174     2012      09        17        261              0.210000      21.723877       1.148791       0.303690       0.290500       0.297900       0.193800       0.135000
57682     57682     hunan          113.5597       28.7097          125       174     2012      09        18        262              0.208167      21.978424       0.477520       0.303802       0.321500       0.374400   -9999.000000       0.339000
57682     57682     hunan          113.5597       28.7097          125       174     2012      09        19        263              0.206292      23.131226       0.000000       0.300876       0.359000   -9999.000000   -9999.000000   -9999.000000
57682     57682     hunan          113.5597       28.7097          125       174     2012      09        20        264              0.205750      24.379364       6.003071       0.297760   -9999.000000       0.286000       0.250000       0.355000
57682     57682     hunan          113.5597       28.7097          125       174     2012      09        21        265              0.282583      25.221283      34.258549       0.304195   -9999.000000   -9999.000000       0.209100   -9999.000000
57682     57682     hunan          113.5597       28.7097          125       174     2012      09        22        266              0.279208      22.920654       2.922516       0.351749       0.485000   -9999.000000       0.194300       0.447000
57682     57682     hunan          113.5597       28.7097          125       174     2012      09        23        267              0.271542      23.402527       6.259257       0.331441       0.391500       0.422200       0.213700   -9999.000000
57682     57682     hunan          113.5597       28.7097          125       174     2012      09        24        268              0.267750      23.431427       2.357879       0.328848       0.397000   -9999.000000   -9999.000000       0.524000
57682     57682     hunan          113.5597       28.7097          125       174     2012      09        25        269              0.260167      23.458679       0.844682       0.322427       0.413000       0.261400   -9999.000000       0.711000
57682     57682     hunan          113.5597       28.7097          125       174     2012      09        26        270              0.252083      24.780151       0.754131       0.315535   -9999.000000       0.466600       0.293500   -9999.000000
57682     57682     hunan          113.5597       28.7097          125       174     2012      09        27        271              0.245857      24.620636       0.000000       0.312680       0.262000   -9999.000000       0.282400       0.404000
57682     57682     hunan          113.5597       28.7097          125       174     2012      09        28        272              0.231067      23.795105       0.000000       0.309682       0.365000   -9999.000000       0.307800   -9999.000000
57682     57682     hunan          113.5597       28.7097          125       174     2012      09        29        273              0.225917      21.111938       0.000000       0.303846       0.375000   -9999.000000   -9999.000000       0.103000
57682     57682     hunan          113.5597       28.7097          125       174     2012      09        30        274              0.220542      20.050293       0.641192       0.301772       0.425000   -9999.000000   -9999.000000       0.360000
57682     57682     hunan          113.5597       28.7097          125       174     2012      10        01        275              0.217292      20.292297       0.000000       0.302504   -9999.000000   -9999.000000   -9999.000000   -9999.000000
57682     57682     hunan          113.5597       28.7097          125       174     2012      10        02        276              0.217167      21.473114       0.389862       0.300753       0.202000   -9999.000000       0.192700       0.259000
57682     57682     hunan          113.5597       28.7097          125       174     2012      10        03        277              0.212833      22.286774       1.732794       0.299585       0.263000       0.392400       0.182700   -9999.000000
57682     57682     hunan          113.5597       28.7097          125       174     2012      10        04        278              0.212292      21.160858       3.562912       0.302531       0.273000   -9999.000000       0.200600       0.519000
57682     57682     hunan          113.5597       28.7097          125       174     2012      10        05        279              0.212292      21.355652       4.339293       0.308854       0.293000       0.309500   -9999.000000   -9999.000000
57682     57682     hunan          113.5597       28.7097          125       174     2012      10        06        280              0.213042      19.667328       2.341223       0.313623   -9999.000000       0.391400   -9999.000000   -9999.000000
57682     57682     hunan          113.5597       28.7097          125       174     2012      10        07        281              0.211875      21.340393       0.000000       0.310301   -9999.000000   -9999.000000       0.214300       0.401000
57682     57682     hunan          113.5597       28.7097          125       174     2012      10        08        282              0.211500      20.603394       1.115033       0.305885       0.203000       0.283300       0.135000   -9999.000000
57682     57682     hunan          113.5597       28.7097          125       174     2012      10        09        283              0.211417      20.526001       2.277107       0.305402       0.279500       0.373400       0.156700       0.249000
57682     57682     hunan          113.5597       28.7097          125       174     2012      10        10        284              0.210708      20.435028       0.441888       0.307030       0.272000   -9999.000000       0.130700   -9999.000000
57682     57682     hunan          113.5597       28.7097          125       174     2012      10        11        285              0.208583      20.995483       0.000000       0.301866       0.214000       0.479500   -9999.000000       0.294000
57682     57682     hunan          113.5597       28.7097          125       174     2012      10        12        286              0.206542      21.151855       0.000000       0.299282   -9999.000000   -9999.000000   -9999.000000       0.423000
57682     57682     hunan          113.5597       28.7097          125       174     2012      10        13        287              0.206250      20.997009       0.074164       0.297728       0.164000       0.219900       0.142300   -9999.000000
57682     57682     hunan          113.5597       28.7097          125       174     2012      10        14        288              0.207792      19.364594       3.923252       0.298492       0.215000       0.312700       0.149500       0.487000
57682     57682     hunan          113.5597       28.7097          125       174     2012      10        15        289              0.209750      19.247131       2.455046       0.308121       0.217000   -9999.000000       0.241900   -9999.000000
57682     57682     hunan          113.5597       28.7097          125       174     2012      10        16        290              0.223542      21.189484       8.202690       0.307585       0.271000       0.225100   -9999.000000       0.545000
57682     57682     hunan          113.5597       28.7097          125       174     2012      10        17        291              0.226292      18.815613       0.000000       0.321075   -9999.000000   -9999.000000   -9999.000000       0.498000
57682     57682     hunan          113.5597       28.7097          125       174     2012      10        18        292              0.219417      17.518127       0.573557       0.306825   -9999.000000       0.380500   -9999.000000   -9999.000000
57682     57682     hunan          113.5597       28.7097          125       174     2012      10        19        293              0.214167      18.752533       0.285943       0.302936       0.194000       0.256300       0.219500       0.215000
57682     57682     hunan          113.5597       28.7097          125       174     2012      10        20        294              0.211500      20.131439       1.878510       0.301250       0.265000   -9999.000000       0.234600   -9999.000000
57682     57682     hunan          113.5597       28.7097          125       174     2012      10        21        295              0.216292      22.299896      16.927435       0.302126       0.220500       0.556500       0.223600       0.578000
57682     57682     hunan          113.5597       28.7097          125       174     2012      10        22        296              0.259458      23.221130       4.315165       0.320613   -9999.000000   -9999.000000   -9999.000000   -9999.000000
57682     57682     hunan          113.5597       28.7097          125       174     2012      10        23        297              0.246333      16.740784       1.323711       0.327893   -9999.000000       0.466500   -9999.000000       0.414000
57682     57682     hunan          113.5597       28.7097          125       174     2012      10        24        298              0.237083      17.843567       0.893173       0.315004   -9999.000000       0.264900       0.218100       0.676000
57682     57682     hunan          113.5597       28.7097          125       174     2012      10        25        299              0.000000      16.743774       1.637188       0.310428       0.249500   -9999.000000       0.208700   -9999.000000
57682     57682     hunan          113.5597       28.7097          125       174     2012      10        26        300              0.225750      17.206726       0.572906       0.310443       0.256000       0.300400       0.216700       0.486000
57682     57682     hunan          113.5597       28.7097          125       174     2012      10        27        301              0.226458      18.153381       1.056857       0.309842       0.283000       0.345100       0.230200   -9999.000000
57682     57682     hunan          113.5597       28.7097          125       174     2012      10        28        302              0.000000      17.578278       8.445820       0.309699   -9999.000000       0.194500   -9999.000000       0.420000
57682     57682     hunan          113.5597       28.7097          125       174     2012      10        29        303              0.293478      19.020111      44.012859       0.315390       0.240000       0.292200   -9999.000000       1.000000
57682     57682     hunan          113.5597       28.7097          125       174     2012      10        30        304              0.279750      17.908783       7.570232       0.365406       0.244500   -9999.000000       0.197600   -9999.000000
57682     57682     hunan          113.5597       28.7097          125       174     2012      10        31        305              0.267500      16.599213       0.569713       0.346811       0.244500       0.475100       0.247600       0.396000
57682     57682     hunan          113.5597       28.7097          125       174     2012      11        01        306              0.260458      16.447937       0.879760       0.328075       0.223000       0.417500       0.211500   -9999.000000
57682     57682     hunan          113.5597       28.7097          125       174     2012      11        02        307              0.253375      15.756561       0.791325       0.322599   -9999.000000   -9999.000000   -9999.000000       0.331000
57682     57682     hunan          113.5597       28.7097          125       174     2012      11        03        308              0.250333      16.641998       6.404929       0.320115   -9999.000000       0.319700   -9999.000000   -9999.000000
57682     57682     hunan          113.5597       28.7097          125       174     2012      11        04        309              0.249292      14.257690       3.008003       0.328145       0.175000   -9999.000000       0.248100   -9999.000000
57682     57682     hunan          113.5597       28.7097          125       174     2012      11        05        310              0.245083      14.614441       1.645189       0.324092       0.299000       0.274400       0.202100       0.379000
57682     57682     hunan          113.5597       28.7097          125       174     2012      11        06        311              0.241125      14.231140       1.185979       0.321184       0.233000       0.167900       0.187500   -9999.000000
57682     57682     hunan          113.5597       28.7097          125       174     2012      11        07        312              0.242625      15.050232       9.574663       0.318604       0.263000   -9999.000000       0.209100       0.578000
57682     57682     hunan          113.5597       28.7097          125       174     2012      11        08        313              0.288667      13.774506       6.117089       0.327113   -9999.000000       0.347700   -9999.000000   -9999.000000
57682     57682     hunan          113.5597       28.7097          125       174     2012      11        09        314              0.297458      12.965363      17.586266       0.334086   -9999.000000       0.320600   -9999.000000       0.953000
57682     57682     hunan          113.5597       28.7097          125       174     2012      11        10        315              0.287833      12.848450       3.031075       0.346136       0.266500       0.337100       0.212500       0.863000
57682     57682     hunan          113.5597       28.7097          125       174     2012      11        11        316              0.272208      12.284912       0.689990       0.336400       0.267000       0.277500       0.221200   -9999.000000
57682     57682     hunan          113.5597       28.7097          125       174     2012      11        12        317              0.264083      12.402008       0.131827       0.326746       0.244000   -9999.000000       0.222500       0.381000
57682     57682     hunan          113.5597       28.7097          125       174     2012      11        13        318              0.000000      12.495758       0.000000       0.323375   -9999.000000       0.398600       0.202500   -9999.000000
57682     57682     hunan          113.5597       28.7097          125       174     2012      11        14        319              0.256042      14.495697       1.122808       0.320367   -9999.000000       0.238500   -9999.000000       0.471000
57682     57682     hunan          113.5597       28.7097          125       174     2012      11        15        320              0.290375      14.250641      45.261730       0.321246       0.207000       0.136000   -9999.000000       0.536000
57682     57682     hunan          113.5597       28.7097          125       174     2012      11        16        321              0.298958      12.235138      10.021997       0.364932   -9999.000000       0.371600       0.244800   -9999.000000
57682     57682     hunan          113.5597       28.7097          125       174     2012      11        17        322              0.000000       9.888855       1.455395       0.365722   -9999.000000   -9999.000000       0.223100       0.412000
57682     57682     hunan          113.5597       28.7097          125       174     2012      11        18        323              0.268208      11.476044       0.000000       0.339885       0.238000       0.358400       0.254700   -9999.000000
57682     57682     hunan          113.5597       28.7097          125       174     2012      11        19        324              0.262792      12.356110       1.695454       0.332052   -9999.000000       0.182400   -9999.000000       0.483000
57682     57682     hunan          113.5597       28.7097          125       174     2012      11        20        325              0.266792      12.314484      26.205147       0.330242   -9999.000000   -9999.000000   -9999.000000   -9999.000000
57682     57682     hunan          113.5597       28.7097          125       174     2012      11        21        326              0.299750      12.232483       7.907132       0.344384       0.257500       0.273400       0.251200       0.874000
57682     57682     hunan          113.5597       28.7097          125       174     2012      11        22        327              0.304500      11.539795      33.174725       0.352502       0.201000   -9999.000000       0.210400       0.954000
57682     57682     hunan          113.5597       28.7097          125       174     2012      11        23        328              0.286375      11.313019       3.732185       0.409867   -9999.000000       0.274700       0.207400   -9999.000000
57682     57682     hunan          113.5597       28.7097          125       174     2012      11        24        329              0.274667      10.003967       1.694998       0.357020   -9999.000000       0.548800       0.216300       0.725000
57682     57682     hunan          113.5597       28.7097          125       174     2012      11        25        330              0.284625      10.835663       3.576059       0.341314   -9999.000000   -9999.000000   -9999.000000   -9999.000000
57682     57682     hunan          113.5597       28.7097          125       174     2012      11        26        331              0.274750       9.611603       0.349662       0.340094   -9999.000000       0.230100   -9999.000000       0.542000
57682     57682     hunan          113.5597       28.7097          125       174     2012      11        27        332              0.267125       9.652740       2.589775       0.332940       0.184000   -9999.000000       0.157900       0.454000
57682     57682     hunan          113.5597       28.7097          125       174     2012      11        28        333              0.264625       9.521118       2.496362       0.332773   -9999.000000   -9999.000000       0.154400   -9999.000000
57682     57682     hunan          113.5597       28.7097          125       174     2012      11        29        334              0.262833      10.180939       1.886852       0.331049   -9999.000000       0.301000       0.174100       0.672000
57682     57682     hunan          113.5597       28.7097          125       174     2012      11        30        335              0.263500      10.138458       1.634462       0.329238   -9999.000000   -9999.000000   -9999.000000   -9999.000000
57682     57682     hunan          113.5597       28.7097          125       174     2012      12        01        336              0.266917       9.998596       5.463936       0.327680   -9999.000000       0.464300   -9999.000000       0.534000
57682     57682     hunan          113.5597       28.7097          125       174     2012      12        02        337              0.265000       8.900391       6.153904       0.333962   -9999.000000       0.174500   -9999.000000   -9999.000000
57682     57682     hunan          113.5597       28.7097          125       174     2012      12        03        338              0.261375       7.344452      10.478306       0.332424   -9999.000000       0.190500       0.142000   -9999.000000
57682     57682     hunan          113.5597       28.7097          125       174     2012      12        04        339              0.257708       8.968628       0.179314       0.336968       0.244000       0.327000       0.134300       0.526000
57682     57682     hunan          113.5597       28.7097          125       174     2012      12        05        340              0.253667       9.084778       0.000000       0.330566   -9999.000000   -9999.000000       0.142500   -9999.000000
57682     57682     hunan          113.5597       28.7097          125       174     2012      12        06        341              0.250542       9.279327       1.150816       0.326550   -9999.000000       0.412800   -9999.000000       0.407000
57682     57682     hunan          113.5597       28.7097          125       174     2012      12        07        342              0.248458      10.195190       0.000000       0.324006       0.253000       0.379100   -9999.000000   -9999.000000
57682     57682     hunan          113.5597       28.7097          125       174     2012      12        08        343              0.248125      10.046997       0.391522       0.322597       0.207500   -9999.000000       0.143000       0.353000
57682     57682     hunan          113.5597       28.7097          125       174     2012      12        09        344              0.245833      10.642120       2.272051       0.321211       0.256000       0.250700       0.144200       0.480000
57682     57682     hunan          113.5597       28.7097          125       174     2012      12        10        345              0.250083       9.556427       8.280416       0.323193   -9999.000000   -9999.000000       0.099100   -9999.000000
57682     57682     hunan          113.5597       28.7097          125       174     2012      12        11        346              0.253542       7.113312       1.881957       0.335300   -9999.000000       0.366500       0.105100       0.285000
57682     57682     hunan          113.5597       28.7097          125       174     2012      12        12        347              0.251708       6.766113       0.699536       0.327159       0.154000       0.168700   -9999.000000   -9999.000000
57682     57682     hunan          113.5597       28.7097          125       174     2012      12        13        348              0.250625       7.798492       0.137865       0.323488       0.209500   -9999.000000   -9999.000000       0.399000
57682     57682     hunan          113.5597       28.7097          125       174     2012      12        14        349              0.248625       8.757690       2.245361       0.322426       0.226000       0.256300       0.109400       0.352000
57682     57682     hunan          113.5597       28.7097          125       174     2012      12        15        350              0.000000       7.282074       5.475638       0.324660   -9999.000000   -9999.000000       0.104900   -9999.000000
57682     57682     hunan          113.5597       28.7097          125       174     2012      12        16        351              0.255208       6.597473       0.148933       0.330375   -9999.000000   -9999.000000       0.117400       0.213000
57682     57682     hunan          113.5597       28.7097          125       174     2012      12        17        352              0.265417       6.672852       8.854092       0.324741   -9999.000000       0.504000   -9999.000000   -9999.000000
57682     57682     hunan          113.5597       28.7097          125       174     2012      12        18        353              0.271250       6.072083       0.000000       0.336153   -9999.000000   -9999.000000   -9999.000000       0.531000
57682     57682     hunan          113.5597       28.7097          125       174     2012      12        19        354              0.264917       5.164978       4.013436       0.325496       0.191000       0.221600       0.188300   -9999.000000
57682     57682     hunan          113.5597       28.7097          125       174     2012      12        20        355              0.000000       6.312469      12.368904       0.327067   -9999.000000       0.281000       0.159800       0.661000
57682     57682     hunan          113.5597       28.7097          125       174     2012      12        21        356              0.284542       4.674347       0.124583       0.341791   -9999.000000   -9999.000000       0.155900       0.444000
57682     57682     hunan          113.5597       28.7097          125       174     2012      12        22        357              0.273625       3.649811       0.000000       0.329604   -9999.000000       0.226900       0.150200   -9999.000000
57682     57682     hunan          113.5597       28.7097          125       174     2012      12        23        358              0.267083       3.855591       0.288058       0.324274   -9999.000000   -9999.000000   -9999.000000       0.076000
57682     57682     hunan          113.5597       28.7097          125       174     2012      12        24        359              0.262222       3.908539       0.000000       0.321914   -9999.000000       0.231400   -9999.000000   -9999.000000
57682     57682     hunan          113.5597       28.7097          125       174     2012      12        25        360              0.260542       5.301544       2.290037       0.321119   -9999.000000       0.268600       0.166100       0.515000
57682     57682     hunan          113.5597       28.7097          125       174     2012      12        26        361              0.000000       3.118774      20.032143       0.324437   -9999.000000   -9999.000000       0.220900       0.494000
57682     57682     hunan          113.5597       28.7097          125       174     2012      12        27        362              0.304333       2.677490       2.474871       0.331716   -9999.000000   -9999.000000       0.195900   -9999.000000
57682     57682     hunan          113.5597       28.7097          125       174     2012      12        28        363              0.289000       3.495331      13.769270       0.328090   -9999.000000   -9999.000000       0.186500       0.781000
57682     57682     hunan          113.5597       28.7097          125       174     2012      12        29        364              0.000000       3.391937       8.533366       0.340181   -9999.000000   -9999.000000   -9999.000000   -9999.000000
57682     57682     hunan          113.5597       28.7097          125       174     2012      12        30        365              0.000000       3.624542       1.562482       0.336748   -9999.000000       0.139400   -9999.000000       0.029000
57682     57682     hunan          113.5597       28.7097          125       174     2012      12        31        366              0.272600       2.881317       0.776202       0.343598   -9999.000000   -9999.000000       0.175300   -9999.000000
