# Supplementary material for: Research on Fusing Multisatellite Soil Moisture Data Based on Bayesian Model Averaging
Source: Hindawi journal article supplement (doi:10.1155/2018/9310838), 2018-06-25
Supplement: f1 [file 9310838.f1.zip › 2012_sm00-10cm_daily_ZDB_ZHY_57714_366days_allin.txt]

57714     57714     guizhou        106.2367       27.4739          130       145     2012      01        01        001              0.000000   -9999.000000       1.144169   -9999.000000       0.085000       0.267500   -9999.000000   -9999.000000
57714     57714     guizhou        106.2367       27.4739          130       145     2012      01        02        002              0.460167       4.914276       8.318548       0.269680   -9999.000000       0.178400   -9999.000000       0.245000
57714     57714     guizhou        106.2367       27.4739          130       145     2012      01        03        003              0.000000       4.583344      15.403862       0.285599   -9999.000000   -9999.000000       0.042700   -9999.000000
57714     57714     guizhou        106.2367       27.4739          130       145     2012      01        04        004              0.484636       2.597443       1.086231       0.304257   -9999.000000   -9999.000000       0.037600       0.373000
57714     57714     guizhou        106.2367       27.4739          130       145     2012      01        05        005              0.479143       1.921600       0.286365       0.283560   -9999.000000   -9999.000000       0.034000   -9999.000000
57714     57714     guizhou        106.2367       27.4739          130       145     2012      01        06        006              0.000000       1.481934       1.567211       0.262648   -9999.000000       0.027100       0.034200       0.272000
57714     57714     guizhou        106.2367       27.4739          130       145     2012      01        07        007              0.000000       2.391571       0.128472       0.271314   -9999.000000       0.064500   -9999.000000   -9999.000000
57714     57714     guizhou        106.2367       27.4739          130       145     2012      01        08        008              0.000000       2.263428       1.790013       0.268622   -9999.000000   -9999.000000   -9999.000000       0.245000
57714     57714     guizhou        106.2367       27.4739          130       145     2012      01        09        009              0.000000       3.417572       0.522217       0.276027       0.091000       0.151900   -9999.000000       0.260000
57714     57714     guizhou        106.2367       27.4739          130       145     2012      01        10        010              0.480143       3.638306       5.303453       0.275274       0.094000   -9999.000000       0.038300   -9999.000000
57714     57714     guizhou        106.2367       27.4739          130       145     2012      01        11        011              0.488217       3.007446       1.539034       0.280514   -9999.000000   -9999.000000       0.033600       0.363000
57714     57714     guizhou        106.2367       27.4739          130       145     2012      01        12        012              0.484600       2.719696       0.777709       0.281753   -9999.000000       0.332300   -9999.000000   -9999.000000
57714     57714     guizhou        106.2367       27.4739          130       145     2012      01        13        013              0.000000       2.473419       1.740648       0.273011   -9999.000000   -9999.000000   -9999.000000       0.663000
57714     57714     guizhou        106.2367       27.4739          130       145     2012      01        14        014              0.000000       3.292664       0.169643       0.277927       0.079000   -9999.000000   -9999.000000       0.546000
57714     57714     guizhou        106.2367       27.4739          130       145     2012      01        15        015              0.000000       3.881897       0.544798       0.277131       0.073000   -9999.000000       0.038000   -9999.000000
57714     57714     guizhou        106.2367       27.4739          130       145     2012      01        16        016              0.000000       4.538116       1.184233       0.276831       0.065000   -9999.000000       0.038200       0.408000
57714     57714     guizhou        106.2367       27.4739          130       145     2012      01        17        017              0.000000       4.977783       1.049397       0.276590   -9999.000000       0.081700       0.031600   -9999.000000
57714     57714     guizhou        106.2367       27.4739          130       145     2012      01        18        018              0.481000       3.402710       0.732717       0.276505   -9999.000000   -9999.000000   -9999.000000       0.669000
57714     57714     guizhou        106.2367       27.4739          130       145     2012      01        19        019              0.482136       3.643372       0.925885       0.274643   -9999.000000       0.182400   -9999.000000       0.325000
57714     57714     guizhou        106.2367       27.4739          130       145     2012      01        20        020              0.485625       3.461182       0.470872       0.273805   -9999.000000       0.222900       0.037400       0.355000
57714     57714     guizhou        106.2367       27.4739          130       145     2012      01        21        021              0.484000       3.155518       0.495898       0.271565   -9999.000000   -9999.000000       0.040300       0.477000
57714     57714     guizhou        106.2367       27.4739          130       145     2012      01        22        022              0.000000       2.837830       1.512879       0.268395   -9999.000000   -9999.000000       0.032800   -9999.000000
57714     57714     guizhou        106.2367       27.4739          130       145     2012      01        23        023              0.000000       2.312836       0.000000       0.260267   -9999.000000   -9999.000000   -9999.000000       0.220000
57714     57714     guizhou        106.2367       27.4739          130       145     2012      01        24        024              0.477000       1.780762       0.793228       0.248993   -9999.000000   -9999.000000   -9999.000000   -9999.000000
57714     57714     guizhou        106.2367       27.4739          130       145     2012      01        25        025              0.476250       2.144836       0.080560       0.255139   -9999.000000   -9999.000000   -9999.000000       0.280000
57714     57714     guizhou        106.2367       27.4739          130       145     2012      01        26        026              0.474000       2.332977       0.000000       0.257549   -9999.000000   -9999.000000       0.033300       0.186000
57714     57714     guizhou        106.2367       27.4739          130       145     2012      01        27        027              0.471739       3.297516       0.529383       0.263254   -9999.000000       0.207200       0.033700   -9999.000000
57714     57714     guizhou        106.2367       27.4739          130       145     2012      01        28        028              0.474870       3.226593       0.341569       0.267050   -9999.000000   -9999.000000       0.026400       0.377000
57714     57714     guizhou        106.2367       27.4739          130       145     2012      01        29        029              0.474000       3.779083       0.108791       0.270518   -9999.000000   -9999.000000   -9999.000000   -9999.000000
57714     57714     guizhou        106.2367       27.4739          130       145     2012      01        30        030              0.474000       3.776459       0.000000       0.268856   -9999.000000       0.024600   -9999.000000       0.241000
57714     57714     guizhou        106.2367       27.4739          130       145     2012      01        31        031              0.471818       5.087250       0.000000       0.268191       0.075000   -9999.000000   -9999.000000       0.351000
57714     57714     guizhou        106.2367       27.4739          130       145     2012      02        01        032              0.470000       7.962341       2.296405       0.266986       0.069000       0.017800       0.050600   -9999.000000
57714     57714     guizhou        106.2367       27.4739          130       145     2012      02        02        033              0.467783       7.803589       0.867009       0.270196       0.068000       0.219200       0.046700       0.408000
57714     57714     guizhou        106.2367       27.4739          130       145     2012      02        03        034              0.470000       5.069519       1.189350       0.274658   -9999.000000   -9999.000000       0.041400   -9999.000000
57714     57714     guizhou        106.2367       27.4739          130       145     2012      02        04        035              0.470000       5.031830       0.323435       0.269960   -9999.000000       0.128600   -9999.000000       0.176000
57714     57714     guizhou        106.2367       27.4739          130       145     2012      02        05        036              0.472000       7.667542       1.061162       0.268352       0.065000   -9999.000000   -9999.000000   -9999.000000
57714     57714     guizhou        106.2367       27.4739          130       145     2012      02        06        037              0.475263       6.290161       0.198165       0.270943       0.066500       0.087100       0.031000       0.327000
57714     57714     guizhou        106.2367       27.4739          130       145     2012      02        07        038              0.472909       7.975128       0.000000       0.268491       0.068000       0.146100       0.032600       0.233000
57714     57714     guizhou        106.2367       27.4739          130       145     2012      02        08        039              0.468500       7.838806       0.000000       0.265510   -9999.000000   -9999.000000       0.027200   -9999.000000
57714     57714     guizhou        106.2367       27.4739          130       145     2012      02        09        040              0.467000       3.508484       0.000000       0.258881   -9999.000000       0.034600   -9999.000000   -9999.000000
57714     57714     guizhou        106.2367       27.4739          130       145     2012      02        10        041              0.469783       2.099274       0.732567       0.251456   -9999.000000   -9999.000000   -9999.000000   -9999.000000
57714     57714     guizhou        106.2367       27.4739          130       145     2012      02        11        042              0.477000       2.673920       0.211009       0.257482   -9999.000000       0.055300   -9999.000000       0.020000
57714     57714     guizhou        106.2367       27.4739          130       145     2012      02        12        043              0.477625       2.884521       1.193061       0.258622   -9999.000000   -9999.000000   -9999.000000       0.249000
57714     57714     guizhou        106.2367       27.4739          130       145     2012      02        13        044              0.480667       3.248871       0.085174       0.264170   -9999.000000   -9999.000000       0.023500   -9999.000000
57714     57714     guizhou        106.2367       27.4739          130       145     2012      02        14        045              0.480000       3.851349       0.138508       0.266562   -9999.000000       0.258200   -9999.000000       0.304000
57714     57714     guizhou        106.2367       27.4739          130       145     2012      02        15        046              0.478696       4.546082       0.271972       0.266149       0.087000   -9999.000000   -9999.000000   -9999.000000
57714     57714     guizhou        106.2367       27.4739          130       145     2012      02        16        047              0.477000       5.199127       0.163710       0.265256       0.085000   -9999.000000   -9999.000000       0.286000
57714     57714     guizhou        106.2367       27.4739          130       145     2012      02        17        048              0.477000       4.720886       0.000000       0.264579   -9999.000000       0.052400       0.031600       0.116000
57714     57714     guizhou        106.2367       27.4739          130       145     2012      02        18        049              0.000000       3.742188       0.000000       0.262237   -9999.000000   -9999.000000       0.028200       0.092000
57714     57714     guizhou        106.2367       27.4739          130       145     2012      02        19        050              0.475500       3.077789       0.464929       0.256069   -9999.000000       0.203000       0.029800       0.286000
57714     57714     guizhou        106.2367       27.4739          130       145     2012      02        20        051              0.479750       2.989624       1.725027       0.256326       0.089000       0.147300       0.026400   -9999.000000
57714     57714     guizhou        106.2367       27.4739          130       145     2012      02        21        052              0.484095       3.996155       1.760773       0.266129       0.073500   -9999.000000   -9999.000000       0.561000
57714     57714     guizhou        106.2367       27.4739          130       145     2012      02        22        053              0.000000       5.288818       0.757374       0.271630       0.072000       0.078600   -9999.000000   -9999.000000
57714     57714     guizhou        106.2367       27.4739          130       145     2012      02        23        054              0.000000       6.118256       2.772883       0.270167       0.065000   -9999.000000       0.032900       0.508000
57714     57714     guizhou        106.2367       27.4739          130       145     2012      02        24        055              0.000000       7.940674       7.504078       0.272213   -9999.000000       0.211900       0.032600       0.527000
57714     57714     guizhou        106.2367       27.4739          130       145     2012      02        25        056              0.000000       7.415558       0.735758       0.284235   -9999.000000       0.150800       0.029600   -9999.000000
57714     57714     guizhou        106.2367       27.4739          130       145     2012      02        26        057              0.000000       5.097290       1.191761       0.281316   -9999.000000   -9999.000000   -9999.000000       0.332000
57714     57714     guizhou        106.2367       27.4739          130       145     2012      02        27        058              0.000000       3.881561       0.532295       0.274213       0.073000       0.140500   -9999.000000   -9999.000000
57714     57714     guizhou        106.2367       27.4739          130       145     2012      02        28        059              0.480000       4.100067       0.088180       0.271641   -9999.000000   -9999.000000   -9999.000000       0.340000
57714     57714     guizhou        106.2367       27.4739          130       145     2012      02        29        060              0.000000   -9999.000000       0.296771   -9999.000000   -9999.000000       0.092500   -9999.000000   -9999.000000
57714     57714     guizhou        106.2367       27.4739          130       145     2012      03        01        061              0.477000       2.915009       0.787291       0.265576   -9999.000000   -9999.000000       0.036900   -9999.000000
57714     57714     guizhou        106.2367       27.4739          130       145     2012      03        02        062              0.477667       5.166840       1.801111       0.268668       0.106000   -9999.000000       0.032900       0.369000
57714     57714     guizhou        106.2367       27.4739          130       145     2012      03        03        063              0.484750       5.893738       0.588665       0.272077       0.094000       0.183200   -9999.000000   -9999.000000
57714     57714     guizhou        106.2367       27.4739          130       145     2012      03        04        064              0.485125       5.248199       0.070008       0.271218       0.095000   -9999.000000   -9999.000000       0.344000
57714     57714     guizhou        106.2367       27.4739          130       145     2012      03        05        065              0.483667       5.476410       2.117538       0.268284       0.077000       0.038800       0.036400   -9999.000000
57714     57714     guizhou        106.2367       27.4739          130       145     2012      03        06        066              0.485000      10.530457       4.760974       0.268669   -9999.000000       0.154100       0.040200       0.730000
57714     57714     guizhou        106.2367       27.4739          130       145     2012      03        07        067              0.000000       7.554077       0.382492       0.280013       0.105000   -9999.000000       0.035900       0.432000
57714     57714     guizhou        106.2367       27.4739          130       145     2012      03        08        068              0.484000       6.071564       0.149068       0.275874       0.100500   -9999.000000       0.031000   -9999.000000
57714     57714     guizhou        106.2367       27.4739          130       145     2012      03        09        069              0.480870       6.176147       3.946875       0.270932       0.103000       0.135600   -9999.000000       0.514000
57714     57714     guizhou        106.2367       27.4739          130       145     2012      03        10        070              0.484409       5.499664       0.274350       0.276055       0.092000   -9999.000000   -9999.000000   -9999.000000
57714     57714     guizhou        106.2367       27.4739          130       145     2012      03        11        071              0.482333       6.687592       0.241734       0.275268   -9999.000000       0.175500       0.038200       0.489000
57714     57714     guizhou        106.2367       27.4739          130       145     2012      03        12        072              0.480000       7.800262       0.279083       0.270540       0.112000   -9999.000000       0.038100       0.285000
57714     57714     guizhou        106.2367       27.4739          130       145     2012      03        13        073              0.478500       7.353485       1.522687       0.269416       0.104500   -9999.000000       0.035200   -9999.000000
57714     57714     guizhou        106.2367       27.4739          130       145     2012      03        14        074              0.476000      12.635406       2.518269       0.264664       0.107500       0.211800   -9999.000000       0.095000
57714     57714     guizhou        106.2367       27.4739          130       145     2012      03        15        075              0.477000      12.156219       0.545237       0.267582       0.099000   -9999.000000   -9999.000000   -9999.000000
57714     57714     guizhou        106.2367       27.4739          130       145     2012      03        16        076              0.477000      11.219269       0.307629       0.271811   -9999.000000       0.086400   -9999.000000       0.391000
57714     57714     guizhou        106.2367       27.4739          130       145     2012      03        17        077              0.477625      13.172180       0.056255       0.267029   -9999.000000   -9999.000000       0.036300       0.372000
57714     57714     guizhou        106.2367       27.4739          130       145     2012      03        18        078              0.477625      14.251862       0.000000       0.265454       0.090500       0.104500       0.034800       0.291000
57714     57714     guizhou        106.2367       27.4739          130       145     2012      03        19        079              0.476217      17.824341       0.000000       0.261207       0.093500       0.114000       0.037000       0.604000
57714     57714     guizhou        106.2367       27.4739          130       145     2012      03        20        080              0.470913      21.614655       0.171630       0.255761       0.090500   -9999.000000   -9999.000000   -9999.000000
57714     57714     guizhou        106.2367       27.4739          130       145     2012      03        21        081              0.467000      16.101227       0.000000       0.257320   -9999.000000       0.126400   -9999.000000       0.300000
57714     57714     guizhou        106.2367       27.4739          130       145     2012      03        22        082              0.465750      16.387451       5.560032       0.255707   -9999.000000   -9999.000000       0.045700   -9999.000000
57714     57714     guizhou        106.2367       27.4739          130       145     2012      03        23        083              0.469478      13.417908       1.563808       0.269184       0.102000       0.110800       0.043100       0.355000
57714     57714     guizhou        106.2367       27.4739          130       145     2012      03        24        084              0.469125       9.127686       0.000000       0.273291       0.088500       0.257900       0.036300       0.461000
57714     57714     guizhou        106.2367       27.4739          130       145     2012      03        25        085              0.000000      15.138275       0.352655       0.261124       0.088500   -9999.000000       0.036500   -9999.000000
57714     57714     guizhou        106.2367       27.4739          130       145     2012      03        26        086              0.459250      17.287354       0.000000       0.255988       0.090000       0.072000   -9999.000000       0.208000
57714     57714     guizhou        106.2367       27.4739          130       145     2012      03        27        087              0.456750      15.660828       1.019618       0.256716   -9999.000000       0.164000   -9999.000000   -9999.000000
57714     57714     guizhou        106.2367       27.4739          130       145     2012      03        28        088              0.459292      17.032410       3.733211       0.257222       0.112000   -9999.000000       0.052600       0.465000
57714     57714     guizhou        106.2367       27.4739          130       145     2012      03        29        089              0.484708      16.804291       1.400485       0.269801       0.108000       0.099100       0.053300       0.523000
57714     57714     guizhou        106.2367       27.4739          130       145     2012      03        30        090              0.490625      15.048309       6.976605       0.267851       0.106500   -9999.000000       0.048500   -9999.000000
57714     57714     guizhou        106.2367       27.4739          130       145     2012      03        31        091              0.491708      13.687347       0.000000       0.275428       0.098000       0.070200   -9999.000000       0.352000
57714     57714     guizhou        106.2367       27.4739          130       145     2012      04        01        092              0.479917      14.671417       0.176631       0.272655   -9999.000000       0.089300   -9999.000000   -9999.000000
57714     57714     guizhou        106.2367       27.4739          130       145     2012      04        02        093              0.469375      19.501190       0.000000       0.260369   -9999.000000   -9999.000000   -9999.000000       0.400000
57714     57714     guizhou        106.2367       27.4739          130       145     2012      04        03        094              0.459625      22.927216       0.000000       0.251188       0.084000       0.239500       0.046200   -9999.000000
57714     57714     guizhou        106.2367       27.4739          130       145     2012      04        04        095              0.448125      19.395416       0.000000       0.250708       0.085500   -9999.000000       0.049000       0.328000
57714     57714     guizhou        106.2367       27.4739          130       145     2012      04        05        096              0.437565      19.559113       0.252840       0.247236       0.086500       0.128900       0.040800       0.289000
57714     57714     guizhou        106.2367       27.4739          130       145     2012      04        06        097              0.429500      18.397705       0.283553       0.246867   -9999.000000       0.209500   -9999.000000   -9999.000000
57714     57714     guizhou        106.2367       27.4739          130       145     2012      04        07        098              0.425833      16.402283       0.154649       0.248617   -9999.000000   -9999.000000   -9999.000000       0.078000
57714     57714     guizhou        106.2367       27.4739          130       145     2012      04        08        099              0.421375      15.211334       3.974719       0.250439       0.101000       0.149600       0.050000   -9999.000000
57714     57714     guizhou        106.2367       27.4739          130       145     2012      04        09        100              0.431708      16.633453       0.278557       0.259699       0.099500   -9999.000000       0.072300       0.420000
57714     57714     guizhou        106.2367       27.4739          130       145     2012      04        10        101              0.434000      18.691803       0.000000       0.259116       0.090500       0.067000       0.076200       0.379000
57714     57714     guizhou        106.2367       27.4739          130       145     2012      04        11        102              0.431333      18.527008       1.040616       0.255193       0.097000       0.075900       0.063200   -9999.000000
57714     57714     guizhou        106.2367       27.4739          130       145     2012      04        12        103              0.428875      18.938843       0.414005       0.255749   -9999.000000   -9999.000000   -9999.000000       0.097000
57714     57714     guizhou        106.2367       27.4739          130       145     2012      04        13        104              0.421250      16.218048       0.000000       0.257393       0.124000       0.231200   -9999.000000   -9999.000000
57714     57714     guizhou        106.2367       27.4739          130       145     2012      04        14        105              0.406500      15.020111       0.000000       0.252175       0.105000       0.028800       0.064800       0.241000
57714     57714     guizhou        106.2367       27.4739          130       145     2012      04        15        106              0.386583      19.673828       0.000000       0.247245       0.093500   -9999.000000       0.064600       0.264000
57714     57714     guizhou        106.2367       27.4739          130       145     2012      04        16        107              0.376125      19.862640       0.000000       0.243575       0.093000       0.062100       0.076000       0.199000
57714     57714     guizhou        106.2367       27.4739          130       145     2012      04        17        108              0.370792      18.637146       0.000000       0.244549   -9999.000000   -9999.000000   -9999.000000       0.308000
57714     57714     guizhou        106.2367       27.4739          130       145     2012      04        18        109              0.366000      17.224335       0.000000       0.245354       0.108000       0.056500   -9999.000000   -9999.000000
57714     57714     guizhou        106.2367       27.4739          130       145     2012      04        19        110              0.398500      17.956512       5.862577       0.245231       0.124000       0.055100   -9999.000000       0.261000
57714     57714     guizhou        106.2367       27.4739          130       145     2012      04        20        111              0.475125      19.306702       0.098058       0.258964       0.107500   -9999.000000       0.082900   -9999.000000
57714     57714     guizhou        106.2367       27.4739          130       145     2012      04        21        112              0.457000      18.798859       4.962953       0.259340       0.101000       0.244900       0.086600       0.269000
57714     57714     guizhou        106.2367       27.4739          130       145     2012      04        22        113              0.431708      22.064240       0.847461       0.246681   -9999.000000   -9999.000000   -9999.000000       0.533000
57714     57714     guizhou        106.2367       27.4739          130       145     2012      04        23        114              0.393917      24.830811       0.000000       0.239186   -9999.000000       0.149900   -9999.000000   -9999.000000
57714     57714     guizhou        106.2367       27.4739          130       145     2012      04        24        115              0.381458      26.797272       0.599805       0.231680       0.130500       0.126300   -9999.000000       0.360000
57714     57714     guizhou        106.2367       27.4739          130       145     2012      04        25        116              0.000000      23.946533       0.000000       0.233055       0.134500   -9999.000000       0.090500   -9999.000000
57714     57714     guizhou        106.2367       27.4739          130       145     2012      04        26        117              0.416167      19.403229       2.601660       0.234713       0.112000       0.101700       0.098000       0.263000
57714     57714     guizhou        106.2367       27.4739          130       145     2012      04        27        118              0.387833      22.389130       1.229883       0.236822   -9999.000000   -9999.000000       0.083300       0.441000
57714     57714     guizhou        106.2367       27.4739          130       145     2012      04        28        119              0.368042      24.206299       0.572461       0.239410   -9999.000000       0.083500   -9999.000000   -9999.000000
57714     57714     guizhou        106.2367       27.4739          130       145     2012      04        29        120              0.406435      23.589996       6.163281       0.237615       0.146000       0.217300   -9999.000000       0.560000
57714     57714     guizhou        106.2367       27.4739          130       145     2012      04        30        121              0.480750      23.716370       0.000000       0.254876       0.126000   -9999.000000   -9999.000000   -9999.000000
57714     57714     guizhou        106.2367       27.4739          130       145     2012      05        01        122              0.469917      26.150360       0.419136       0.244347       0.167500       0.204200       0.101200       0.349000
57714     57714     guizhou        106.2367       27.4739          130       145     2012      05        02        123              0.464625      21.112396       1.126341       0.244475       0.150000       0.116200       0.110600   -9999.000000
57714     57714     guizhou        106.2367       27.4739          130       145     2012      05        03        124              0.466870      20.844635       0.306684       0.246440   -9999.000000   -9999.000000       0.091400       0.464000
57714     57714     guizhou        106.2367       27.4739          130       145     2012      05        04        125              0.464875      21.044281       0.000000       0.247618       0.177000       0.092000   -9999.000000       0.569000
57714     57714     guizhou        106.2367       27.4739          130       145     2012      05        05        126              0.454696      21.847717       1.024262       0.244265       0.166000   -9999.000000   -9999.000000   -9999.000000
57714     57714     guizhou        106.2367       27.4739          130       145     2012      05        06        127              0.437750      23.340942       1.362765       0.240926       0.146000       0.158500   -9999.000000       0.455000
57714     57714     guizhou        106.2367       27.4739          130       145     2012      05        07        128              0.400292      26.439819       0.000000       0.236081   -9999.000000       0.077800       0.080200   -9999.000000
57714     57714     guizhou        106.2367       27.4739          130       145     2012      05        08        129              0.449087      28.214539       4.398054       0.226239   -9999.000000   -9999.000000       0.094900       0.911000
57714     57714     guizhou        106.2367       27.4739          130       145     2012      05        09        130              0.484958      26.372528       0.695423       0.243316   -9999.000000       0.058700       0.077800       0.673000
57714     57714     guizhou        106.2367       27.4739          130       145     2012      05        10        131              0.474417      25.814331       0.950893       0.241902       0.154500   -9999.000000   -9999.000000   -9999.000000
57714     57714     guizhou        106.2367       27.4739          130       145     2012      05        11        132              0.488208      24.894653      58.734055       0.236727   -9999.000000       0.257600   -9999.000000       0.957000
57714     57714     guizhou        106.2367       27.4739          130       145     2012      05        12        133              0.493167      26.695374       0.169224       0.299759       0.183500   -9999.000000       0.098400   -9999.000000
57714     57714     guizhou        106.2367       27.4739          130       145     2012      05        13        134              0.491083      21.618896       8.552035       0.299524   -9999.000000   -9999.000000       0.102300       0.956000
57714     57714     guizhou        106.2367       27.4739          130       145     2012      05        14        135              0.492087      21.564545       1.828685       0.292938   -9999.000000       0.393900       0.094500       0.697000
57714     57714     guizhou        106.2367       27.4739          130       145     2012      05        15        136              0.480000      19.039185       0.000000       0.282399       0.157000   -9999.000000   -9999.000000       0.407000
57714     57714     guizhou        106.2367       27.4739          130       145     2012      05        16        137              0.474333      20.763916       0.000000       0.270435       0.168500       0.212500   -9999.000000       0.686000
57714     57714     guizhou        106.2367       27.4739          130       145     2012      05        17        138              0.467625      21.515106       1.289846       0.264365       0.148000       0.096600   -9999.000000   -9999.000000
57714     57714     guizhou        106.2367       27.4739          130       145     2012      05        18        139              0.462083      22.568207       0.554010       0.262071   -9999.000000   -9999.000000       0.088600       0.525000
57714     57714     guizhou        106.2367       27.4739          130       145     2012      05        19        140              0.444625      24.393158       0.000000       0.260537   -9999.000000       0.072600       0.086300   -9999.000000
57714     57714     guizhou        106.2367       27.4739          130       145     2012      05        20        141              0.428792      27.373657       3.183387       0.249296   -9999.000000       0.190200       0.083800       0.443000
57714     57714     guizhou        106.2367       27.4739          130       145     2012      05        21        142              0.484583      25.632904      11.886957       0.253928       0.137000   -9999.000000   -9999.000000       0.729000
57714     57714     guizhou        106.2367       27.4739          130       145     2012      05        22        143              0.554261      21.804504       0.179131       0.275281       0.168500       0.155300   -9999.000000   -9999.000000
57714     57714     guizhou        106.2367       27.4739          130       145     2012      05        23        144              0.545792      20.174255       3.156994       0.277976   -9999.000000   -9999.000000       0.087000       0.900000
57714     57714     guizhou        106.2367       27.4739          130       145     2012      05        24        145              0.550478      20.019928       1.958322       0.272161   -9999.000000       0.436700       0.088800   -9999.000000
57714     57714     guizhou        106.2367       27.4739          130       145     2012      05        25        146              0.000000      19.822418       0.499359       0.274574       0.167000       0.217800       0.077600       0.768000
57714     57714     guizhou        106.2367       27.4739          130       145     2012      05        26        147              0.536250      19.198364       0.000000       0.269661       0.150500   -9999.000000       0.069100       0.775000
57714     57714     guizhou        106.2367       27.4739          130       145     2012      05        27        148              0.528083      22.783905       2.000650       0.259822       0.149500       0.160500   -9999.000000   -9999.000000
57714     57714     guizhou        106.2367       27.4739          130       145     2012      05        28        149              0.544609      21.772217      14.411088       0.262141       0.143000   -9999.000000   -9999.000000       0.763000
57714     57714     guizhou        106.2367       27.4739          130       145     2012      05        29        150              0.567792      22.879822      12.782321       0.276903   -9999.000000       0.177300       0.080600   -9999.000000
57714     57714     guizhou        106.2367       27.4739          130       145     2012      05        30        151              0.544792      20.864624       0.169203       0.304461   -9999.000000       0.142600       0.078000   -9999.000000
57714     57714     guizhou        106.2367       27.4739          130       145     2012      05        31        152              0.539750      24.301910      12.835579       0.275142       0.113000   -9999.000000       0.069700   -9999.000000
57714     57714     guizhou        106.2367       27.4739          130       145     2012      06        01        153              0.565167      21.538910       8.254384       0.281334       0.174500       0.195400   -9999.000000       0.738000
57714     57714     guizhou        106.2367       27.4739          130       145     2012      06        02        154              0.553208      19.773651       4.898914       0.301030       0.143000   -9999.000000   -9999.000000       0.791000
57714     57714     guizhou        106.2367       27.4739          130       145     2012      06        03        155              0.563958      21.430237       7.220709       0.286611   -9999.000000       0.142500   -9999.000000   -9999.000000
57714     57714     guizhou        106.2367       27.4739          130       145     2012      06        04        156              0.559542      19.455780       0.403242       0.291988   -9999.000000       0.183100       0.058500       0.798000
57714     57714     guizhou        106.2367       27.4739          130       145     2012      06        05        157              0.554042      20.827881       2.577261       0.283899       0.186000   -9999.000000       0.059900   -9999.000000
57714     57714     guizhou        106.2367       27.4739          130       145     2012      06        06        158              0.556458      21.578247       3.956506       0.278948       0.186500       0.155300       0.052800       0.710000
57714     57714     guizhou        106.2367       27.4739          130       145     2012      06        07        159              0.563167      21.364960       1.235658       0.279489       0.167500   -9999.000000   -9999.000000       0.949000
57714     57714     guizhou        106.2367       27.4739          130       145     2012      06        08        160              0.553583      22.241547       5.090218       0.282057   -9999.000000   -9999.000000   -9999.000000   -9999.000000
57714     57714     guizhou        106.2367       27.4739          130       145     2012      06        09        161              0.562417      23.282745       0.567265       0.278514   -9999.000000       0.219800       0.059200       0.791000
57714     57714     guizhou        106.2367       27.4739          130       145     2012      06        10        162              0.554583      23.037689       7.425864       0.280725   -9999.000000   -9999.000000       0.059000   -9999.000000
57714     57714     guizhou        106.2367       27.4739          130       145     2012      06        11        163              0.000000      23.209167       2.897910       0.282631       0.166000       0.209700       0.052900       0.863000
57714     57714     guizhou        106.2367       27.4739          130       145     2012      06        12        164              0.423500      23.399994       1.129707       0.284969       0.169500   -9999.000000       0.049200       0.891000
57714     57714     guizhou        106.2367       27.4739          130       145     2012      06        13        165              0.401375      21.691803       0.355781       0.282069       0.151000   -9999.000000   -9999.000000       0.729000
57714     57714     guizhou        106.2367       27.4739          130       145     2012      06        14        166              0.395667      22.272339       0.000000       0.274393   -9999.000000       0.242400   -9999.000000       0.806000
57714     57714     guizhou        106.2367       27.4739          130       145     2012      06        15        167              0.387000      23.401123       0.260505       0.270008       0.152000   -9999.000000       0.044600   -9999.000000
57714     57714     guizhou        106.2367       27.4739          130       145     2012      06        16        168              0.374958      25.046448       0.159341       0.264536       0.142000       0.207200       0.045800       0.530000
57714     57714     guizhou        106.2367       27.4739          130       145     2012      06        17        169              0.354875      25.365448       0.617940       0.260522       0.145500       0.168100       0.044400   -9999.000000
57714     57714     guizhou        106.2367       27.4739          130       145     2012      06        18        170              0.354913      24.782898      10.382431       0.260143   -9999.000000   -9999.000000   -9999.000000       0.939000
57714     57714     guizhou        106.2367       27.4739          130       145     2012      06        19        171              0.374524      21.898834       1.201021       0.287024   -9999.000000       0.066400   -9999.000000       0.913000
57714     57714     guizhou        106.2367       27.4739          130       145     2012      06        20        172              0.365417      22.633057       0.000000       0.277699   -9999.000000   -9999.000000   -9999.000000   -9999.000000
57714     57714     guizhou        106.2367       27.4739          130       145     2012      06        21        173              0.388917      25.545074      18.949280       0.266046       0.174000       0.141500       0.068800       1.000000
57714     57714     guizhou        106.2367       27.4739          130       145     2012      06        22        174              0.417333      23.280334       9.305688       0.296277       0.156000       0.141800       0.064900   -9999.000000
57714     57714     guizhou        106.2367       27.4739          130       145     2012      06        23        175              0.400875      21.684113       0.000000       0.303253       0.141000   -9999.000000       0.056800       0.627000
57714     57714     guizhou        106.2367       27.4739          130       145     2012      06        24        176              0.392783      23.782715       1.327416       0.280964   -9999.000000       0.250500   -9999.000000       0.753000
57714     57714     guizhou        106.2367       27.4739          130       145     2012      06        25        177              0.404304      25.157593      21.725401       0.275730   -9999.000000   -9999.000000   -9999.000000   -9999.000000
57714     57714     guizhou        106.2367       27.4739          130       145     2012      06        26        178              0.411833      24.559265       0.561717       0.295910       0.151500   -9999.000000       0.090400       0.806000
57714     57714     guizhou        106.2367       27.4739          130       145     2012      06        27        179              0.405583      24.372101      11.820107       0.295744       0.141000       0.230100       0.093400   -9999.000000
57714     57714     guizhou        106.2367       27.4739          130       145     2012      06        28        180              0.425250      26.223907      10.684531       0.287800       0.142000   -9999.000000       0.095700       0.983000
57714     57714     guizhou        106.2367       27.4739          130       145     2012      06        29        181              0.404917      26.029175       0.184827       0.308160       0.131000       0.186900       0.078900   -9999.000000
57714     57714     guizhou        106.2367       27.4739          130       145     2012      06        30        182              0.415208      28.159271       1.903331       0.281858   -9999.000000       0.193800   -9999.000000   -9999.000000
57714     57714     guizhou        106.2367       27.4739          130       145     2012      07        01        183              0.404750      27.406097       0.000000       0.280667       0.184000   -9999.000000   -9999.000000       0.790000
57714     57714     guizhou        106.2367       27.4739          130       145     2012      07        02        184              0.388333      27.734680       0.000000       0.272699       0.175500       0.188700       0.107300   -9999.000000
57714     57714     guizhou        106.2367       27.4739          130       145     2012      07        03        185              0.367833      27.771637       0.000000       0.267168       0.167500   -9999.000000       0.101900       0.470000
57714     57714     guizhou        106.2367       27.4739          130       145     2012      07        04        186              0.379042      27.161926      14.202782       0.265655       0.168000       0.091100       0.102500   -9999.000000
57714     57714     guizhou        106.2367       27.4739          130       145     2012      07        05        187              0.407583      26.365021       3.404247       0.287473   -9999.000000   -9999.000000   -9999.000000       0.826000
57714     57714     guizhou        106.2367       27.4739          130       145     2012      07        06        188              0.392583      26.779510       0.000000       0.289140   -9999.000000   -9999.000000   -9999.000000       0.721000
57714     57714     guizhou        106.2367       27.4739          130       145     2012      07        07        189              0.370083      28.701172       0.000000       0.272739   -9999.000000       0.146500   -9999.000000   -9999.000000
57714     57714     guizhou        106.2367       27.4739          130       145     2012      07        08        190              0.333000      28.528900       0.000000       0.266421       0.163000   -9999.000000       0.101100       0.363000
57714     57714     guizhou        106.2367       27.4739          130       145     2012      07        09        191              0.288250      29.105927       0.000000       0.259748       0.159000       0.074400       0.131100   -9999.000000
57714     57714     guizhou        106.2367       27.4739          130       145     2012      07        10        192              0.261625      29.531342      50.008465       0.255367   -9999.000000       0.132800       0.098400       0.827000
57714     57714     guizhou        106.2367       27.4739          130       145     2012      07        11        193              0.333667      28.899506      84.565712       0.341073   -9999.000000   -9999.000000   -9999.000000       0.708000
57714     57714     guizhou        106.2367       27.4739          130       145     2012      07        12        194              0.425174      28.072845      31.038713       0.365997   -9999.000000       0.145000   -9999.000000       0.955000
57714     57714     guizhou        106.2367       27.4739          130       145     2012      07        13        195              0.410083      25.274933       0.356439       0.451462       0.303000   -9999.000000       0.135500       0.933000
57714     57714     guizhou        106.2367       27.4739          130       145     2012      07        14        196              0.393750      26.434387       0.000000       0.386461       0.276000       0.121900       0.138100   -9999.000000
57714     57714     guizhou        106.2367       27.4739          130       145     2012      07        15        197              0.390292      27.954224       5.821764       0.312565       0.266000       0.029500       0.128100       1.000000
57714     57714     guizhou        106.2367       27.4739          130       145     2012      07        16        198              0.423625      26.950623      30.579287       0.305711   -9999.000000   -9999.000000   -9999.000000   -9999.000000
57714     57714     guizhou        106.2367       27.4739          130       145     2012      07        17        199              0.420958      24.589630       9.701258       0.326163       0.351000       0.128500   -9999.000000       1.000000
57714     57714     guizhou        106.2367       27.4739          130       145     2012      07        18        200              0.427417      24.211853      26.324533       0.319218       0.340000   -9999.000000   -9999.000000       1.000000
57714     57714     guizhou        106.2367       27.4739          130       145     2012      07        19        201              0.419667      25.263031       7.078254       0.330580       0.287500   -9999.000000       0.090600   -9999.000000
57714     57714     guizhou        106.2367       27.4739          130       145     2012      07        20        202              0.409625      26.097565       0.000000       0.320002       0.242000       0.185500       0.088700       0.758000
57714     57714     guizhou        106.2367       27.4739          130       145     2012      07        21        203              0.398208      28.356262       6.431632       0.303427   -9999.000000   -9999.000000       0.083300   -9999.000000
57714     57714     guizhou        106.2367       27.4739          130       145     2012      07        22        204              0.419958      28.835785      33.696163       0.298974   -9999.000000       0.270600   -9999.000000       0.993000
57714     57714     guizhou        106.2367       27.4739          130       145     2012      07        23        205              0.421739      24.480408       3.503424       0.326191       0.359500       0.260500   -9999.000000       0.892000
57714     57714     guizhou        106.2367       27.4739          130       145     2012      07        24        206              0.429875      23.714478      11.784384       0.311992       0.425000   -9999.000000   -9999.000000   -9999.000000
57714     57714     guizhou        106.2367       27.4739          130       145     2012      07        25        207              0.434833      23.681793      29.820210       0.313965       0.413000       0.208400       0.184900       1.000000
57714     57714     guizhou        106.2367       27.4739          130       145     2012      07        26        208              0.421667      25.525909       1.445142       0.328897   -9999.000000   -9999.000000       0.168200   -9999.000000
57714     57714     guizhou        106.2367       27.4739          130       145     2012      07        27        209              0.411542      26.675507       1.766279       0.316164   -9999.000000       0.023400       0.150700       0.722000
57714     57714     guizhou        106.2367       27.4739          130       145     2012      07        28        210              0.399833      27.658081       6.197683       0.301717       0.383000       0.121300   -9999.000000   -9999.000000
57714     57714     guizhou        106.2367       27.4739          130       145     2012      07        29        211              0.384667      27.385162       0.831194       0.302418       0.335000   -9999.000000   -9999.000000       0.667000
57714     57714     guizhou        106.2367       27.4739          130       145     2012      07        30        212              0.357833      27.645935       0.000000       0.293087       0.325500       0.172000       0.133700       0.638000
57714     57714     guizhou        106.2367       27.4739          130       145     2012      07        31        213              0.334958      28.489197      17.011223       0.285149   -9999.000000   -9999.000000       0.132900   -9999.000000
57714     57714     guizhou        106.2367       27.4739          130       145     2012      08        01        214              0.359583      27.908447       4.078975       0.302158   -9999.000000       0.166100       0.123700       0.596000
57714     57714     guizhou        106.2367       27.4739          130       145     2012      08        02        215              0.344458      27.379028       2.719017       0.293002       0.384000       0.029100   -9999.000000   -9999.000000
57714     57714     guizhou        106.2367       27.4739          130       145     2012      08        03        216              0.314333      27.874268       0.000000       0.284923       0.356000   -9999.000000   -9999.000000       0.602000
57714     57714     guizhou        106.2367       27.4739          130       145     2012      08        04        217              0.284542      28.598145       0.000000       0.276242       0.359000       0.168000   -9999.000000       0.653000
57714     57714     guizhou        106.2367       27.4739          130       145     2012      08        05        218              0.267542      29.216949       6.783818       0.271051       0.362500       0.065400       0.144300   -9999.000000
57714     57714     guizhou        106.2367       27.4739          130       145     2012      08        06        219              0.268708      28.668060      10.376101       0.284129   -9999.000000   -9999.000000       0.161300       0.744000
57714     57714     guizhou        106.2367       27.4739          130       145     2012      08        07        220              0.331917      26.208466      14.267061       0.298912   -9999.000000       0.064800       0.138900   -9999.000000
57714     57714     guizhou        106.2367       27.4739          130       145     2012      08        08        221              0.337292      26.159454       2.270144       0.306775       0.375500   -9999.000000   -9999.000000       0.718000
57714     57714     guizhou        106.2367       27.4739          130       145     2012      08        09        222              0.313000      27.113708       0.889202       0.285937       0.354000       0.204100   -9999.000000       0.654000
57714     57714     guizhou        106.2367       27.4739          130       145     2012      08        10        223              0.279542      27.919678       0.704784       0.278249       0.350000       0.319600       0.146500       0.559000
57714     57714     guizhou        106.2367       27.4739          130       145     2012      08        11        224              0.253000      28.795776       0.753402       0.271715       0.181000   -9999.000000       0.152600       0.675000
57714     57714     guizhou        106.2367       27.4739          130       145     2012      08        12        225              0.236958      29.280884       0.754733       0.269536   -9999.000000       0.050800       0.154000   -9999.000000
57714     57714     guizhou        106.2367       27.4739          130       145     2012      08        13        226              0.227708      29.732697       0.540176       0.267355       0.231000   -9999.000000       0.132300       0.621000
57714     57714     guizhou        106.2367       27.4739          130       145     2012      08        14        227              0.221167      29.665131       1.315508       0.263539       0.214500       0.091200   -9999.000000   -9999.000000
57714     57714     guizhou        106.2367       27.4739          130       145     2012      08        15        228              0.216792      29.389313       2.886022       0.261701       0.231500       0.092300   -9999.000000       0.623000
57714     57714     guizhou        106.2367       27.4739          130       145     2012      08        16        229              0.215833      28.811676       0.000000       0.269000       0.181000   -9999.000000       0.141700       0.465000
57714     57714     guizhou        106.2367       27.4739          130       145     2012      08        17        230              0.211500      29.732483       0.203340       0.261301   -9999.000000       0.160100       0.143700   -9999.000000
57714     57714     guizhou        106.2367       27.4739          130       145     2012      08        18        231              0.217417      29.203094       3.483158       0.255905   -9999.000000   -9999.000000       0.141900       0.738000
57714     57714     guizhou        106.2367       27.4739          130       145     2012      08        19        232              0.221708      27.959564       0.000000       0.265242       0.195500       0.058600   -9999.000000   -9999.000000
57714     57714     guizhou        106.2367       27.4739          130       145     2012      08        20        233              0.308583      28.375092      10.334815       0.256519       0.229000       0.058400   -9999.000000       0.821000
57714     57714     guizhou        106.2367       27.4739          130       145     2012      08        21        234              0.359167      27.950226       0.960000       0.279589       0.314500   -9999.000000   -9999.000000       0.542000
57714     57714     guizhou        106.2367       27.4739          130       145     2012      08        22        235              0.350000      25.662720       0.301782       0.268199   -9999.000000       0.099000       0.110300   -9999.000000
57714     57714     guizhou        106.2367       27.4739          130       145     2012      08        23        236              0.340125      23.618469       0.000000       0.265805   -9999.000000       0.047900       0.105900       0.473000
57714     57714     guizhou        106.2367       27.4739          130       145     2012      08        24        237              0.310500      24.757538       0.000000       0.258661   -9999.000000   -9999.000000       0.096600   -9999.000000
57714     57714     guizhou        106.2367       27.4739          130       145     2012      08        25        238              0.000000      25.891693       0.000000       0.251426       0.323000       0.015000   -9999.000000       0.442000
57714     57714     guizhou        106.2367       27.4739          130       145     2012      08        26        239              0.259667      26.153320       0.000000       0.248416       0.307000   -9999.000000   -9999.000000   -9999.000000
57714     57714     guizhou        106.2367       27.4739          130       145     2012      08        27        240              0.241000      26.350372       3.685030       0.245631       0.244000       0.146900       0.110900       0.465000
57714     57714     guizhou        106.2367       27.4739          130       145     2012      08        28        241              0.231500      27.351898       2.768852       0.240697   -9999.000000       0.120100       0.119300       0.497000
57714     57714     guizhou        106.2367       27.4739          130       145     2012      08        29        242              0.270833      26.316071       9.370451       0.247323   -9999.000000   -9999.000000       0.116500   -9999.000000
57714     57714     guizhou        106.2367       27.4739          130       145     2012      08        30        243              0.383792      26.518219       4.322883       0.267196       0.283000       0.017100       0.103200       0.585000
57714     57714     guizhou        106.2367       27.4739          130       145     2012      08        31        244              0.369208      26.945099       0.000000       0.268698       0.312500   -9999.000000   -9999.000000   -9999.000000
57714     57714     guizhou        106.2367       27.4739          130       145     2012      09        01        245              0.376333      27.618164      44.406544       0.255814       0.231000   -9999.000000   -9999.000000       0.639000
57714     57714     guizhou        106.2367       27.4739          130       145     2012      09        02        246              0.387792      26.344971       0.000000       0.295148   -9999.000000       0.192400       0.120000       0.784000
57714     57714     guizhou        106.2367       27.4739          130       145     2012      09        03        247              0.375458      24.413239       0.245200       0.294998   -9999.000000   -9999.000000       0.125200   -9999.000000
57714     57714     guizhou        106.2367       27.4739          130       145     2012      09        04        248              0.362125      23.849274       0.000000       0.277800       0.241500       0.113400       0.115600       0.347000
57714     57714     guizhou        106.2367       27.4739          130       145     2012      09        05        249              0.341958      24.514984       0.000000       0.266248       0.218000   -9999.000000   -9999.000000   -9999.000000
57714     57714     guizhou        106.2367       27.4739          130       145     2012      09        06        250              0.310250      24.988098       0.000000       0.259328       0.222500       0.018200   -9999.000000       0.530000
57714     57714     guizhou        106.2367       27.4739          130       145     2012      09        07        251              0.275250      27.141388       0.000000       0.252120       0.198000       0.112700   -9999.000000       0.472000
57714     57714     guizhou        106.2367       27.4739          130       145     2012      09        08        252              0.254500      27.407684       1.210093       0.246527   -9999.000000   -9999.000000       0.128800       0.452000
57714     57714     guizhou        106.2367       27.4739          130       145     2012      09        09        253              0.244125      28.148712       0.757334       0.245496       0.237000   -9999.000000       0.123900       0.544000
57714     57714     guizhou        106.2367       27.4739          130       145     2012      09        10        254              0.233833      27.667419       0.537899       0.246517       0.235000       0.127000       0.153500   -9999.000000
57714     57714     guizhou        106.2367       27.4739          130       145     2012      09        11        255              0.326875      28.173492      21.271679       0.239671       0.155000   -9999.000000   -9999.000000       0.958000
57714     57714     guizhou        106.2367       27.4739          130       145     2012      09        12        256              0.376792      24.212524       8.429721       0.296082       0.154000       0.135800   -9999.000000   -9999.000000
57714     57714     guizhou        106.2367       27.4739          130       145     2012      09        13        257              0.378917      20.980743       0.144900       0.289959   -9999.000000   -9999.000000       0.174200       0.442000
57714     57714     guizhou        106.2367       27.4739          130       145     2012      09        14        258              0.361417      21.494659       0.000000       0.280420   -9999.000000       0.098000       0.176200       0.588000
57714     57714     guizhou        106.2367       27.4739          130       145     2012      09        15        259              0.343417      22.432709       6.537872       0.265100       0.098000       0.216000       0.157700   -9999.000000
57714     57714     guizhou        106.2367       27.4739          130       145     2012      09        16        260              0.387917      22.423035      14.596822       0.265347       0.170500   -9999.000000       0.171300       0.743000
57714     57714     guizhou        106.2367       27.4739          130       145     2012      09        17        261              0.376917      17.625336       1.247048       0.302898       0.154500       0.078000   -9999.000000   -9999.000000
57714     57714     guizhou        106.2367       27.4739          130       145     2012      09        18        262              0.381875      18.550140       2.539705       0.280886   -9999.000000   -9999.000000   -9999.000000       0.687000
57714     57714     guizhou        106.2367       27.4739          130       145     2012      09        19        263              0.374333      19.183777       3.593793       0.282318   -9999.000000       0.258300       0.086000       0.616000
57714     57714     guizhou        106.2367       27.4739          130       145     2012      09        20        264              0.390833      21.640228       7.617426       0.274053       0.177000   -9999.000000       0.088900   -9999.000000
57714     57714     guizhou        106.2367       27.4739          130       145     2012      09        21        265              0.386792      20.320953       0.239302       0.289325   -9999.000000   -9999.000000       0.080600       0.734000
57714     57714     guizhou        106.2367       27.4739          130       145     2012      09        22        266              0.382375      20.112671       5.057810       0.282499       0.168000       0.039400   -9999.000000   -9999.000000
57714     57714     guizhou        106.2367       27.4739          130       145     2012      09        23        267              0.390125      20.696869       2.691038       0.280908       0.164000   -9999.000000   -9999.000000       0.772000
57714     57714     guizhou        106.2367       27.4739          130       145     2012      09        24        268              0.389000      19.926361       3.118108       0.286349   -9999.000000       0.089700   -9999.000000   -9999.000000
57714     57714     guizhou        106.2367       27.4739          130       145     2012      09        25        269              0.390042      19.808380       4.175648       0.284748   -9999.000000       0.187400       0.086100       0.873000
57714     57714     guizhou        106.2367       27.4739          130       145     2012      09        26        270              0.391125      20.498810       1.554767       0.282506       0.154000   -9999.000000       0.075400       0.947000
57714     57714     guizhou        106.2367       27.4739          130       145     2012      09        27        271              0.389214      20.929688       2.710025       0.283523       0.165000       0.320400       0.071300   -9999.000000
57714     57714     guizhou        106.2367       27.4739          130       145     2012      09        28        272              0.389400      20.965668       0.000000       0.278793       0.157000   -9999.000000   -9999.000000       0.608000
57714     57714     guizhou        106.2367       27.4739          130       145     2012      09        29        273              0.381000      21.166168       0.000000       0.277614   -9999.000000   -9999.000000   -9999.000000   -9999.000000
57714     57714     guizhou        106.2367       27.4739          130       145     2012      09        30        274              0.373583      22.598175       1.088322       0.268953   -9999.000000       0.201400       0.069900       0.628000
57714     57714     guizhou        106.2367       27.4739          130       145     2012      10        01        275              0.365583      20.728790       0.000000       0.267348       0.091000   -9999.000000       0.059500       0.613000
57714     57714     guizhou        106.2367       27.4739          130       145     2012      10        02        276              0.356500      22.283112       6.400282       0.264514       0.103500       0.207400       0.058000   -9999.000000
57714     57714     guizhou        106.2367       27.4739          130       145     2012      10        03        277              0.390292      21.483032       4.500650       0.273612       0.099500       0.146600   -9999.000000       0.624000
57714     57714     guizhou        106.2367       27.4739          130       145     2012      10        04        278              0.404250      19.481323      17.593815       0.288490       0.113000   -9999.000000   -9999.000000   -9999.000000
57714     57714     guizhou        106.2367       27.4739          130       145     2012      10        05        279              0.397917      18.557037       3.597072       0.307258   -9999.000000       0.165100   -9999.000000       0.912000
57714     57714     guizhou        106.2367       27.4739          130       145     2012      10        06        280              0.397750      18.751495       2.045999       0.295106       0.116000   -9999.000000       0.066400       0.885000
57714     57714     guizhou        106.2367       27.4739          130       145     2012      10        07        281              0.398875      17.978943       2.950303       0.287678       0.120000       0.183200       0.069900       0.879000
57714     57714     guizhou        106.2367       27.4739          130       145     2012      10        08        282              0.399125      17.383728       3.067532       0.284789       0.112500       0.311000       0.049400       0.918000
57714     57714     guizhou        106.2367       27.4739          130       145     2012      10        09        283              0.398708      17.560791       1.962993       0.287421       0.108500   -9999.000000   -9999.000000   -9999.000000
57714     57714     guizhou        106.2367       27.4739          130       145     2012      10        10        284              0.399167      17.268280       2.488287       0.285563   -9999.000000       0.144200   -9999.000000       0.716000
57714     57714     guizhou        106.2367       27.4739          130       145     2012      10        11        285              0.399792      17.750092       2.486560       0.285098   -9999.000000   -9999.000000       0.055000   -9999.000000
57714     57714     guizhou        106.2367       27.4739          130       145     2012      10        12        286              0.400750      16.474640       5.943059       0.285379       0.142000       0.096700       0.053600   -9999.000000
57714     57714     guizhou        106.2367       27.4739          130       145     2012      10        13        287              0.397667      16.457001       0.394696       0.288957       0.134500       0.100800       0.053500       0.875000
57714     57714     guizhou        106.2367       27.4739          130       145     2012      10        14        288              0.398417      17.735657       1.502867       0.285530       0.138500   -9999.000000       0.049200   -9999.000000
57714     57714     guizhou        106.2367       27.4739          130       145     2012      10        15        289              0.397875      17.612579       0.575501       0.282092       0.120000       0.154700   -9999.000000       0.949000
57714     57714     guizhou        106.2367       27.4739          130       145     2012      10        16        290              0.393542      17.968201       1.580397       0.280428   -9999.000000       0.174000   -9999.000000   -9999.000000
57714     57714     guizhou        106.2367       27.4739          130       145     2012      10        17        291              0.396208      18.085907       0.215667       0.279547       0.136000   -9999.000000       0.062500       0.544000
57714     57714     guizhou        106.2367       27.4739          130       145     2012      10        18        292              0.387500      18.220947       0.000000       0.277115       0.131500       0.064700       0.065400       0.709000
57714     57714     guizhou        106.2367       27.4739          130       145     2012      10        19        293              0.383125      20.166260       0.094492       0.271599       0.125500   -9999.000000       0.060500   -9999.000000
57714     57714     guizhou        106.2367       27.4739          130       145     2012      10        20        294              0.379500      18.938171       0.000000       0.272097       0.107000       0.448500   -9999.000000       0.709000
57714     57714     guizhou        106.2367       27.4739          130       145     2012      10        21        295              0.374625      19.333344       0.292740       0.272346   -9999.000000       0.207000   -9999.000000   -9999.000000
57714     57714     guizhou        106.2367       27.4739          130       145     2012      10        22        296              0.368458      21.192352       0.760818       0.270034   -9999.000000   -9999.000000   -9999.000000       0.459000
57714     57714     guizhou        106.2367       27.4739          130       145     2012      10        23        297              0.366083      17.973053       1.027830       0.272113   -9999.000000       0.097000       0.050300   -9999.000000
57714     57714     guizhou        106.2367       27.4739          130       145     2012      10        24        298              0.362708      17.146881       0.000000       0.272733   -9999.000000   -9999.000000       0.054200       0.584000
57714     57714     guizhou        106.2367       27.4739          130       145     2012      10        25        299              0.000000      16.679504       0.132826       0.270565       0.119500       0.234100       0.049800       0.457000
57714     57714     guizhou        106.2367       27.4739          130       145     2012      10        26        300              0.358375      16.159119       0.000000       0.269965   -9999.000000       0.267600   -9999.000000   -9999.000000
57714     57714     guizhou        106.2367       27.4739          130       145     2012      10        27        301              0.356250      17.078186       0.201383       0.268028   -9999.000000   -9999.000000   -9999.000000       0.389000
57714     57714     guizhou        106.2367       27.4739          130       145     2012      10        28        302              0.000000      18.277985       0.000000       0.267022       0.116000       0.195900       0.054200   -9999.000000
57714     57714     guizhou        106.2367       27.4739          130       145     2012      10        29        303              0.348042      19.691772       0.126918       0.265751       0.120500   -9999.000000       0.084600       0.468000
57714     57714     guizhou        106.2367       27.4739          130       145     2012      10        30        304              0.343083      17.652008       1.066166       0.265648       0.113000       0.054000       0.084500       0.486000
57714     57714     guizhou        106.2367       27.4739          130       145     2012      10        31        305              0.332125      15.576324       0.000000       0.268209       0.098000       0.036300       0.078100   -9999.000000
57714     57714     guizhou        106.2367       27.4739          130       145     2012      11        01        306              0.318750      17.129120       0.000000       0.263083   -9999.000000   -9999.000000   -9999.000000       0.372000
57714     57714     guizhou        106.2367       27.4739          130       145     2012      11        02        307              0.304208      17.415955       0.000000       0.261025       0.149000       0.050900   -9999.000000   -9999.000000
57714     57714     guizhou        106.2367       27.4739          130       145     2012      11        03        308              0.298000      19.221741       0.267294       0.257961       0.155500       0.118200       0.089000       0.419000
57714     57714     guizhou        106.2367       27.4739          130       145     2012      11        04        309              0.300000      16.620056       1.256803       0.260345       0.147500   -9999.000000       0.089900       0.456000
57714     57714     guizhou        106.2367       27.4739          130       145     2012      11        05        310              0.300000      14.398621       0.331847       0.262827       0.164500       0.035900       0.041100       0.576000
57714     57714     guizhou        106.2367       27.4739          130       145     2012      11        06        311              0.300500      12.926544       1.118063       0.263442   -9999.000000   -9999.000000   -9999.000000       0.568000
57714     57714     guizhou        106.2367       27.4739          130       145     2012      11        07        312              0.308042      12.582275       1.421577       0.264588   -9999.000000       0.130800   -9999.000000   -9999.000000
57714     57714     guizhou        106.2367       27.4739          130       145     2012      11        08        313              0.319875      12.445740       2.351465       0.267365       0.164500       0.175700   -9999.000000       0.771000
57714     57714     guizhou        106.2367       27.4739          130       145     2012      11        09        314              0.359625      12.764465       0.383618       0.270088       0.159500   -9999.000000       0.044300   -9999.000000
57714     57714     guizhou        106.2367       27.4739          130       145     2012      11        10        315              0.374625      11.953979       0.093695       0.268800       0.153000       0.052200       0.045900       0.603000
57714     57714     guizhou        106.2367       27.4739          130       145     2012      11        11        316              0.374875      13.227966       0.415849       0.265410       0.094000   -9999.000000       0.039100       0.585000
57714     57714     guizhou        106.2367       27.4739          130       145     2012      11        12        317              0.371375      12.902161       0.000000       0.264176   -9999.000000       0.090600   -9999.000000   -9999.000000
57714     57714     guizhou        106.2367       27.4739          130       145     2012      11        13        318              0.000000      12.151611       0.000000       0.261901       0.104000       0.294400   -9999.000000       0.571000
57714     57714     guizhou        106.2367       27.4739          130       145     2012      11        14        319              0.367000      12.406586       1.182363       0.260995       0.106000   -9999.000000       0.102800   -9999.000000
57714     57714     guizhou        106.2367       27.4739          130       145     2012      11        15        320              0.367000      12.092987       0.770522       0.263997       0.100000       0.096500       0.098700       0.725000
57714     57714     guizhou        106.2367       27.4739          130       145     2012      11        16        321              0.366000      12.316498       0.052023       0.265385       0.099000   -9999.000000       0.085400       0.493000
57714     57714     guizhou        106.2367       27.4739          130       145     2012      11        17        322              0.000000      11.064209       0.000000       0.263100   -9999.000000       0.078000   -9999.000000   -9999.000000
57714     57714     guizhou        106.2367       27.4739          130       145     2012      11        18        323              0.359000      12.210968       0.369533       0.260371   -9999.000000       0.082900   -9999.000000       0.526000
57714     57714     guizhou        106.2367       27.4739          130       145     2012      11        19        324              0.359375      14.148407       2.166041       0.259051       0.095500   -9999.000000   -9999.000000   -9999.000000
57714     57714     guizhou        106.2367       27.4739          130       145     2012      11        20        325              0.376500      13.293640       1.802513       0.264116       0.108000       0.201000       0.041800       0.664000
57714     57714     guizhou        106.2367       27.4739          130       145     2012      11        21        326              0.383250      12.533478       0.416560       0.268250       0.092000       0.074700       0.045300   -9999.000000
57714     57714     guizhou        106.2367       27.4739          130       145     2012      11        22        327              0.383625      12.880615       5.914025       0.266721   -9999.000000   -9999.000000       0.041500       0.643000
57714     57714     guizhou        106.2367       27.4739          130       145     2012      11        23        328              0.389917      11.959595       4.643679       0.274853   -9999.000000       0.062300   -9999.000000       0.829000
57714     57714     guizhou        106.2367       27.4739          130       145     2012      11        24        329              0.385000       9.736633       0.304390       0.286844       0.102000   -9999.000000   -9999.000000   -9999.000000
57714     57714     guizhou        106.2367       27.4739          130       145     2012      11        25        330              0.383625       8.825134       0.205400       0.274253       0.099000       0.297300       0.044500       0.433000
57714     57714     guizhou        106.2367       27.4739          130       145     2012      11        26        331              0.379917       8.310242       0.000000       0.269761       0.095500       0.114400   -9999.000000   -9999.000000
57714     57714     guizhou        106.2367       27.4739          130       145     2012      11        27        332              0.379917       8.225677       1.147515       0.266249       0.098000   -9999.000000       0.091800       0.553000
57714     57714     guizhou        106.2367       27.4739          130       145     2012      11        28        333              0.382000       7.448120       0.000000       0.268164   -9999.000000       0.067300       0.083000       0.353000
57714     57714     guizhou        106.2367       27.4739          130       145     2012      11        29        334              0.385750       9.164093       1.357126       0.265123       0.101000   -9999.000000   -9999.000000   -9999.000000
57714     57714     guizhou        106.2367       27.4739          130       145     2012      11        30        335              0.392000       8.357971       3.219265       0.267806       0.107500       0.126500   -9999.000000       0.481000
57714     57714     guizhou        106.2367       27.4739          130       145     2012      12        01        336              0.388917       7.362854       0.065436       0.274264       0.122500       0.207400       0.088500   -9999.000000
57714     57714     guizhou        106.2367       27.4739          130       145     2012      12        02        337              0.383875       7.727325       0.378537       0.270600       0.111000   -9999.000000       0.090100       0.317000
57714     57714     guizhou        106.2367       27.4739          130       145     2012      12        03        338              0.382000      10.755707       0.000000       0.265836   -9999.000000       0.106700       0.054300       0.483000
57714     57714     guizhou        106.2367       27.4739          130       145     2012      12        04        339              0.377417      10.363770       1.487386       0.263797   -9999.000000   -9999.000000   -9999.000000       0.352000
57714     57714     guizhou        106.2367       27.4739          130       145     2012      12        05        340              0.374917       8.391022       0.000000       0.262721       0.112500       0.149000   -9999.000000       0.438000
57714     57714     guizhou        106.2367       27.4739          130       145     2012      12        06        341              0.371167      10.552795       0.000000       0.260536       0.116000       0.184800   -9999.000000   -9999.000000
57714     57714     guizhou        106.2367       27.4739          130       145     2012      12        07        342              0.367000      10.748169       0.000000       0.259035       0.119000   -9999.000000       0.061700       0.270000
57714     57714     guizhou        106.2367       27.4739          130       145     2012      12        08        343              0.367000       8.901520       0.193720       0.259901       0.120000       0.215600       0.061800   -9999.000000
57714     57714     guizhou        106.2367       27.4739          130       145     2012      12        09        344              0.371542       8.610748       1.286351       0.260344   -9999.000000   -9999.000000       0.054200       0.400000
57714     57714     guizhou        106.2367       27.4739          130       145     2012      12        10        345              0.386333       8.016479       0.124978       0.264027       0.126000       0.085500   -9999.000000       0.393000
57714     57714     guizhou        106.2367       27.4739          130       145     2012      12        11        346              0.384000       7.723145       0.000000       0.263928       0.107000       0.027200   -9999.000000   -9999.000000
57714     57714     guizhou        106.2367       27.4739          130       145     2012      12        12        347              0.382000       7.990112       0.174043       0.261809       0.100000   -9999.000000       0.053700       0.454000
57714     57714     guizhou        106.2367       27.4739          130       145     2012      12        13        348              0.382000       6.921021       3.311835       0.261647       0.089000       0.303100       0.054500   -9999.000000
57714     57714     guizhou        106.2367       27.4739          130       145     2012      12        14        349              0.379708       9.967224       0.000000       0.260828   -9999.000000   -9999.000000       0.052400       0.380000
57714     57714     guizhou        106.2367       27.4739          130       145     2012      12        15        350              0.000000       9.494598       0.341203       0.260208   -9999.000000   -9999.000000       0.045800       0.286000
57714     57714     guizhou        106.2367       27.4739          130       145     2012      12        16        351              0.376083       9.895508       1.801324       0.259841       0.096500       0.022400   -9999.000000   -9999.000000
57714     57714     guizhou        106.2367       27.4739          130       145     2012      12        17        352              0.379625       9.821960       2.289101       0.263076       0.106500   -9999.000000   -9999.000000       0.676000
57714     57714     guizhou        106.2367       27.4739          130       145     2012      12        18        353              0.389792       8.369446       0.648766       0.269666       0.104000       0.190800       0.045700   -9999.000000
57714     57714     guizhou        106.2367       27.4739          130       145     2012      12        19        354              0.388417       6.148102       2.310047       0.269478   -9999.000000       0.135900       0.048200       0.571000
57714     57714     guizhou        106.2367       27.4739          130       145     2012      12        20        355              0.000000       4.264069       1.025831       0.270818   -9999.000000   -9999.000000       0.043200   -9999.000000
57714     57714     guizhou        106.2367       27.4739          130       145     2012      12        21        356              0.391292       4.249268       4.128502       0.270800   -9999.000000   -9999.000000   -9999.000000       0.486000
57714     57714     guizhou        106.2367       27.4739          130       145     2012      12        22        357              0.392083       5.169891       3.970608       0.276677       0.101000   -9999.000000   -9999.000000       0.629000
57714     57714     guizhou        106.2367       27.4739          130       145     2012      12        23        358              0.391333       4.141479       0.407373       0.278662   -9999.000000       0.122600   -9999.000000   -9999.000000
57714     57714     guizhou        106.2367       27.4739          130       145     2012      12        24        359              0.385000       3.537628       0.376624       0.277311   -9999.000000       0.111000       0.052700       0.133000
57714     57714     guizhou        106.2367       27.4739          130       145     2012      12        25        360              0.387125       5.102936       4.924046       0.270468   -9999.000000   -9999.000000       0.052900   -9999.000000
57714     57714     guizhou        106.2367       27.4739          130       145     2012      12        26        361              0.000000       4.240662       0.235328       0.279584   -9999.000000       0.166700       0.047400       0.442000
57714     57714     guizhou        106.2367       27.4739          130       145     2012      12        27        362              0.389000       3.377319       0.206351       0.274794       0.104000   -9999.000000   -9999.000000       0.416000
57714     57714     guizhou        106.2367       27.4739          130       145     2012      12        28        363              0.000000       4.610931       2.191809       0.269935       0.099000       0.301000   -9999.000000   -9999.000000
57714     57714     guizhou        106.2367       27.4739          130       145     2012      12        29        364              0.000000       4.942963       2.536005       0.272436   -9999.000000       0.026500       0.045800       0.068000
57714     57714     guizhou        106.2367       27.4739          130       145     2012      12        30        365              0.000000       2.316101       2.418440       0.263932   -9999.000000   -9999.000000       0.046900   -9999.000000
57714     57714     guizhou        106.2367       27.4739          130       145     2012      12        31        366              0.382800       2.776001       0.713144       0.264107   -9999.000000   -9999.000000       0.043600       0.100000
