# Supplementary material for: Research on Fusing Multisatellite Soil Moisture Data Based on Bayesian Model Averaging
Source: Hindawi journal article supplement (doi:10.1155/2018/9310838), 2018-06-25
Supplement: f1 [file 9310838.f1.zip › 2012_sm00-10cm_daily_ZDB_ZHY_57729_366days_allin.txt]

57729     57729     guizhou        107.8836       27.2231          131       152     2012      01        01        001              0.000000   -9999.000000       0.509401   -9999.000000       0.092000   -9999.000000   -9999.000000   -9999.000000
57729     57729     guizhou        107.8836       27.2231          131       152     2012      01        02        002              0.272292       4.733063       3.624615       0.272962       0.095000       0.271600   -9999.000000       0.168000
57729     57729     guizhou        107.8836       27.2231          131       152     2012      01        03        003              0.000000       4.513580       4.070057       0.278771   -9999.000000   -9999.000000   -9999.000000   -9999.000000
57729     57729     guizhou        107.8836       27.2231          131       152     2012      01        04        004              0.352261       2.300049       2.028341       0.279740   -9999.000000   -9999.000000       0.044600       0.032000
57729     57729     guizhou        107.8836       27.2231          131       152     2012      01        05        005              0.352958       2.050079       0.561807       0.263444       0.095000   -9999.000000       0.045500   -9999.000000
57729     57729     guizhou        107.8836       27.2231          131       152     2012      01        06        006              0.350667       1.359711       0.224004       0.250086   -9999.000000   -9999.000000       0.040300       0.064000
57729     57729     guizhou        107.8836       27.2231          131       152     2012      01        07        007              0.352667       2.212646       0.024328       0.260110       0.102000       0.124200   -9999.000000       0.043000
57729     57729     guizhou        107.8836       27.2231          131       152     2012      01        08        008              0.000000       2.178406       0.081806       0.262404   -9999.000000   -9999.000000   -9999.000000   -9999.000000
57729     57729     guizhou        107.8836       27.2231          131       152     2012      01        09        009              0.351739       3.120636       0.000000       0.265881   -9999.000000       0.109500   -9999.000000       0.122000
57729     57729     guizhou        107.8836       27.2231          131       152     2012      01        10        010              0.354333       3.465424       1.707953       0.266783       0.103500   -9999.000000       0.042200   -9999.000000
57729     57729     guizhou        107.8836       27.2231          131       152     2012      01        11        011              0.357826       3.191895       0.048106       0.267777       0.073000   -9999.000000       0.042500       0.065000
57729     57729     guizhou        107.8836       27.2231          131       152     2012      01        12        012              0.363000       2.380951       2.282542       0.266345   -9999.000000       0.150800       0.041000       0.155000
57729     57729     guizhou        107.8836       27.2231          131       152     2012      01        13        013              0.360917       2.100861       0.916537       0.267143   -9999.000000   -9999.000000   -9999.000000   -9999.000000
57729     57729     guizhou        107.8836       27.2231          131       152     2012      01        14        014              0.363583       2.667175       5.793865       0.271015   -9999.000000       0.216500   -9999.000000       0.202000
57729     57729     guizhou        107.8836       27.2231          131       152     2012      01        15        015              0.361087       3.400208       0.351378       0.280857       0.076000   -9999.000000       0.043300   -9999.000000
57729     57729     guizhou        107.8836       27.2231          131       152     2012      01        16        016              0.352391       3.287994       0.229472       0.278472   -9999.000000   -9999.000000       0.041200       0.127000
57729     57729     guizhou        107.8836       27.2231          131       152     2012      01        17        017              0.000000       3.295258       3.896790       0.272104   -9999.000000       0.042800       0.039300   -9999.000000
57729     57729     guizhou        107.8836       27.2231          131       152     2012      01        18        018              0.362042       2.518463       1.994085       0.276963       0.077000   -9999.000000   -9999.000000       0.324000
57729     57729     guizhou        107.8836       27.2231          131       152     2012      01        19        019              0.364000       2.790222       1.047806       0.275996   -9999.000000   -9999.000000   -9999.000000       0.330000
57729     57729     guizhou        107.8836       27.2231          131       152     2012      01        20        020              0.000000       2.743744       2.878674       0.274353       0.086000   -9999.000000   -9999.000000   -9999.000000
57729     57729     guizhou        107.8836       27.2231          131       152     2012      01        21        021              0.000000       2.297882       0.575728       0.274393   -9999.000000   -9999.000000       0.043600       0.424000
57729     57729     guizhou        107.8836       27.2231          131       152     2012      01        22        022              0.000000       1.906555       0.347818       0.265035   -9999.000000   -9999.000000       0.041200   -9999.000000
57729     57729     guizhou        107.8836       27.2231          131       152     2012      01        23        023              0.000000       1.507416       0.000000       0.245509   -9999.000000   -9999.000000       0.037300       0.173000
57729     57729     guizhou        107.8836       27.2231          131       152     2012      01        24        024              0.000000       1.217438       0.112070       0.232896   -9999.000000   -9999.000000   -9999.000000       0.272000
57729     57729     guizhou        107.8836       27.2231          131       152     2012      01        25        025              0.355773       1.231842       0.195113       0.231003   -9999.000000       0.026300   -9999.000000   -9999.000000
57729     57729     guizhou        107.8836       27.2231          131       152     2012      01        26        026              0.350583       3.298248       0.000000       0.253550   -9999.000000   -9999.000000       0.039100       0.008000
57729     57729     guizhou        107.8836       27.2231          131       152     2012      01        27        027              0.349000       2.697540       0.000000       0.261181       0.092000       0.029100       0.038100   -9999.000000
57729     57729     guizhou        107.8836       27.2231          131       152     2012      01        28        028              0.000000       3.722260       0.445587       0.265426       0.089000   -9999.000000       0.035600       0.037000
57729     57729     guizhou        107.8836       27.2231          131       152     2012      01        29        029              0.334909       5.449707       0.000000       0.266038   -9999.000000   -9999.000000   -9999.000000       0.044000
57729     57729     guizhou        107.8836       27.2231          131       152     2012      01        30        030              0.331913       4.195862       0.000000       0.265768   -9999.000000       0.037100   -9999.000000   -9999.000000
57729     57729     guizhou        107.8836       27.2231          131       152     2012      01        31        031              0.329217       5.228394       0.000000       0.263376       0.088000   -9999.000000   -9999.000000       0.014000
57729     57729     guizhou        107.8836       27.2231          131       152     2012      02        01        032              0.320167       7.767975       0.256220       0.262825       0.082500       0.045300       0.057300   -9999.000000
57729     57729     guizhou        107.8836       27.2231          131       152     2012      02        02        033              0.329955       6.589111       0.288072       0.264562       0.081000   -9999.000000       0.053100       0.037000
57729     57729     guizhou        107.8836       27.2231          131       152     2012      02        03        034              0.353435       3.895508       0.941061       0.264402   -9999.000000   -9999.000000       0.049400   -9999.000000
57729     57729     guizhou        107.8836       27.2231          131       152     2012      02        04        035              0.362500       4.085632       0.394931       0.266356   -9999.000000       0.054200   -9999.000000       0.069000
57729     57729     guizhou        107.8836       27.2231          131       152     2012      02        05        036              0.363500       5.330658       0.733366       0.266324       0.092000   -9999.000000   -9999.000000       0.186000
57729     57729     guizhou        107.8836       27.2231          131       152     2012      02        06        037              0.366176       5.401581       0.000000       0.267701       0.084500   -9999.000000   -9999.000000   -9999.000000
57729     57729     guizhou        107.8836       27.2231          131       152     2012      02        07        038              0.358522       5.801178       0.217504       0.266134       0.084000   -9999.000000       0.049400       0.079000
57729     57729     guizhou        107.8836       27.2231          131       152     2012      02        08        039              0.341792       6.979156       0.000000       0.262124   -9999.000000   -9999.000000       0.049500   -9999.000000
57729     57729     guizhou        107.8836       27.2231          131       152     2012      02        09        040              0.331750       2.943787       0.000000       0.254539   -9999.000000   -9999.000000       0.040900   -9999.000000
57729     57729     guizhou        107.8836       27.2231          131       152     2012      02        10        041              0.332750       1.369202       0.462343       0.236742   -9999.000000   -9999.000000   -9999.000000   -9999.000000
57729     57729     guizhou        107.8836       27.2231          131       152     2012      02        11        042              0.333522       1.829926       0.108627       0.243811       0.096000   -9999.000000   -9999.000000   -9999.000000
57729     57729     guizhou        107.8836       27.2231          131       152     2012      02        12        043              0.343042       3.510162       0.586001       0.256408       0.099000   -9999.000000   -9999.000000       0.039000
57729     57729     guizhou        107.8836       27.2231          131       152     2012      02        13        044              0.367042       2.768219       0.522497       0.259564   -9999.000000   -9999.000000       0.038600   -9999.000000
57729     57729     guizhou        107.8836       27.2231          131       152     2012      02        14        045              0.369391       3.548859       0.203230       0.262851   -9999.000000   -9999.000000   -9999.000000       0.255000
57729     57729     guizhou        107.8836       27.2231          131       152     2012      02        15        046              0.365042       4.155487       0.070948       0.263629       0.088000   -9999.000000   -9999.000000   -9999.000000
57729     57729     guizhou        107.8836       27.2231          131       152     2012      02        16        047              0.359348       4.068359       0.000000       0.262596       0.097500   -9999.000000   -9999.000000       0.078000
57729     57729     guizhou        107.8836       27.2231          131       152     2012      02        17        048              0.356143       4.678406       0.000000       0.261371       0.097000       0.158700   -9999.000000       0.040000
57729     57729     guizhou        107.8836       27.2231          131       152     2012      02        18        049              0.000000       4.156860       0.000000       0.260117   -9999.000000   -9999.000000       0.035400   -9999.000000
57729     57729     guizhou        107.8836       27.2231          131       152     2012      02        19        050              0.351000       2.535217       0.286998       0.254546   -9999.000000   -9999.000000       0.041400       0.083000
57729     57729     guizhou        107.8836       27.2231          131       152     2012      02        20        051              0.354292       4.929291       2.232863       0.259335   -9999.000000   -9999.000000       0.033800   -9999.000000
57729     57729     guizhou        107.8836       27.2231          131       152     2012      02        21        052              0.372652       5.069183       1.767638       0.264859       0.074000   -9999.000000   -9999.000000       0.340000
57729     57729     guizhou        107.8836       27.2231          131       152     2012      02        22        053              0.372556       5.891144       0.915350       0.270628       0.068500       0.140500   -9999.000000       0.315000
57729     57729     guizhou        107.8836       27.2231          131       152     2012      02        23        054              0.000000       7.040344       1.153370       0.268808       0.070000   -9999.000000   -9999.000000   -9999.000000
57729     57729     guizhou        107.8836       27.2231          131       152     2012      02        24        055              0.375353       7.150452       1.740746       0.268507   -9999.000000       0.030700       0.041200       0.261000
57729     57729     guizhou        107.8836       27.2231          131       152     2012      02        25        056              0.371565       6.602448       0.359180       0.270494   -9999.000000       0.126500       0.038200   -9999.000000
57729     57729     guizhou        107.8836       27.2231          131       152     2012      02        26        057              0.365318       4.021942       1.279488       0.267768   -9999.000000   -9999.000000       0.034300       0.021000
57729     57729     guizhou        107.8836       27.2231          131       152     2012      02        27        058              0.360875       2.656403       0.623034       0.259293   -9999.000000       0.050100   -9999.000000   -9999.000000
57729     57729     guizhou        107.8836       27.2231          131       152     2012      02        28        059              0.359083       2.599060       0.580963       0.254893       0.073500   -9999.000000   -9999.000000       0.111000
57729     57729     guizhou        107.8836       27.2231          131       152     2012      02        29        060              0.000000   -9999.000000       0.379936   -9999.000000       0.066000   -9999.000000   -9999.000000   -9999.000000
57729     57729     guizhou        107.8836       27.2231          131       152     2012      03        01        061              0.362783       2.322815       0.174101       0.255441   -9999.000000       0.051100       0.035700   -9999.000000
57729     57729     guizhou        107.8836       27.2231          131       152     2012      03        02        062              0.360125       4.354492       0.966716       0.262227       0.109000   -9999.000000       0.035600       0.127000
57729     57729     guizhou        107.8836       27.2231          131       152     2012      03        03        063              0.378750       4.718872       7.320572       0.264646       0.106000       0.151500   -9999.000000   -9999.000000
57729     57729     guizhou        107.8836       27.2231          131       152     2012      03        04        064              0.372333       3.880127       0.570296       0.277758       0.110000       0.134300   -9999.000000       0.330000
57729     57729     guizhou        107.8836       27.2231          131       152     2012      03        05        065              0.374087       3.707581       0.426307       0.278966       0.098000   -9999.000000   -9999.000000       0.306000
57729     57729     guizhou        107.8836       27.2231          131       152     2012      03        06        066              0.378870       7.608276       2.321968       0.270732   -9999.000000       0.130800       0.041000   -9999.000000
57729     57729     guizhou        107.8836       27.2231          131       152     2012      03        07        067              0.000000       5.427582       2.295556       0.273149   -9999.000000   -9999.000000       0.045000       0.153000
57729     57729     guizhou        107.8836       27.2231          131       152     2012      03        08        068              0.375958       4.291321       1.764350       0.273334       0.113000       0.040700       0.042100   -9999.000000
57729     57729     guizhou        107.8836       27.2231          131       152     2012      03        09        069              0.370292       4.272491       0.261120       0.275462       0.105000       0.262500   -9999.000000       0.287000
57729     57729     guizhou        107.8836       27.2231          131       152     2012      03        10        070              0.367696       4.015411       0.119164       0.271518       0.100500   -9999.000000   -9999.000000       0.359000
57729     57729     guizhou        107.8836       27.2231          131       152     2012      03        11        071              0.360348       6.500122       0.000000       0.267232   -9999.000000       0.168200       0.039800   -9999.000000
57729     57729     guizhou        107.8836       27.2231          131       152     2012      03        12        072              0.354478       7.759674       0.000000       0.264530   -9999.000000   -9999.000000       0.041500       0.152000
57729     57729     guizhou        107.8836       27.2231          131       152     2012      03        13        073              0.352167       8.523315       0.000000       0.262598       0.080000       0.039700       0.039300   -9999.000000
57729     57729     guizhou        107.8836       27.2231          131       152     2012      03        14        074              0.333208      13.330078       1.188955       0.258211       0.097000       0.121100   -9999.000000       0.151000
57729     57729     guizhou        107.8836       27.2231          131       152     2012      03        15        075              0.339913      10.618866       2.160092       0.261286       0.094500   -9999.000000   -9999.000000   -9999.000000
57729     57729     guizhou        107.8836       27.2231          131       152     2012      03        16        076              0.365167      10.348999       0.873509       0.267960       0.088000       0.295300   -9999.000000       0.362000
57729     57729     guizhou        107.8836       27.2231          131       152     2012      03        17        077              0.378333      12.130157       0.721382       0.268194   -9999.000000   -9999.000000       0.042700       0.464000
57729     57729     guizhou        107.8836       27.2231          131       152     2012      03        18        078              0.381875      13.175262       0.196751       0.266513       0.087000   -9999.000000       0.041800   -9999.000000
57729     57729     guizhou        107.8836       27.2231          131       152     2012      03        19        079              0.378870      15.389160       0.686148       0.263376       0.088000       0.137800       0.042100       0.201000
57729     57729     guizhou        107.8836       27.2231          131       152     2012      03        20        080              0.336375      18.661499       0.098489       0.259169       0.093000   -9999.000000   -9999.000000   -9999.000000
57729     57729     guizhou        107.8836       27.2231          131       152     2012      03        21        081              0.322632      12.325745       0.698354       0.257890       0.091000       0.015300   -9999.000000       0.177000
57729     57729     guizhou        107.8836       27.2231          131       152     2012      03        22        082              0.341083      10.576447       8.760490       0.258995   -9999.000000       0.052100   -9999.000000       0.239000
57729     57729     guizhou        107.8836       27.2231          131       152     2012      03        23        083              0.353208       9.522552       0.155640       0.278883       0.092000   -9999.000000       0.048200   -9999.000000
57729     57729     guizhou        107.8836       27.2231          131       152     2012      03        24        084              0.348565      10.131195       0.735758       0.274227       0.087000       0.019100       0.041100       0.239000
57729     57729     guizhou        107.8836       27.2231          131       152     2012      03        25        085              0.000000      15.265778       0.084584       0.263654       0.082000   -9999.000000       0.041900   -9999.000000
57729     57729     guizhou        107.8836       27.2231          131       152     2012      03        26        086              0.334667      16.801941       0.086355       0.258960       0.086000       0.035500   -9999.000000       0.192000
57729     57729     guizhou        107.8836       27.2231          131       152     2012      03        27        087              0.326125      14.855927       3.178739       0.258107   -9999.000000   -9999.000000   -9999.000000       0.227000
57729     57729     guizhou        107.8836       27.2231          131       152     2012      03        28        088              0.371917      15.978699       9.222493       0.261763   -9999.000000   -9999.000000       0.069100       0.650000
57729     57729     guizhou        107.8836       27.2231          131       152     2012      03        29        089              0.392333      14.123260       7.805573       0.289796       0.099000       0.131100       0.069700       0.679000
57729     57729     guizhou        107.8836       27.2231          131       152     2012      03        30        090              0.392958      14.252747       2.916186       0.287890       0.092500   -9999.000000       0.063400   -9999.000000
57729     57729     guizhou        107.8836       27.2231          131       152     2012      03        31        091              0.376583      13.773773       0.000000       0.286820       0.087500       0.043300       0.058500       0.400000
57729     57729     guizhou        107.8836       27.2231          131       152     2012      04        01        092              0.334636      15.800262       0.000000       0.272111   -9999.000000       0.114900   -9999.000000   -9999.000000
57729     57729     guizhou        107.8836       27.2231          131       152     2012      04        02        093              0.283304      19.749237       0.291711       0.262814   -9999.000000   -9999.000000   -9999.000000       0.364000
57729     57729     guizhou        107.8836       27.2231          131       152     2012      04        03        094              0.229250      23.298401       0.000000       0.256529       0.099000       0.154500       0.053700       0.334000
57729     57729     guizhou        107.8836       27.2231          131       152     2012      04        04        095              0.203542      18.793091       1.563384       0.254827       0.094500   -9999.000000       0.055400   -9999.000000
57729     57729     guizhou        107.8836       27.2231          131       152     2012      04        05        096              0.189833      17.016907       0.858706       0.254608       0.086000   -9999.000000       0.053400       0.261000
57729     57729     guizhou        107.8836       27.2231          131       152     2012      04        06        097              0.178125      17.040955       1.910048       0.254552       0.084000       0.012100   -9999.000000   -9999.000000
57729     57729     guizhou        107.8836       27.2231          131       152     2012      04        07        098              0.172875      16.998596       0.122569       0.256742   -9999.000000   -9999.000000   -9999.000000       0.189000
57729     57729     guizhou        107.8836       27.2231          131       152     2012      04        08        099              0.179917      15.037872       7.460215       0.261335   -9999.000000       0.191300   -9999.000000       0.271000
57729     57729     guizhou        107.8836       27.2231          131       152     2012      04        09        100              0.202000      17.179474       0.077699       0.268211       0.103500       0.193000       0.045500   -9999.000000
57729     57729     guizhou        107.8836       27.2231          131       152     2012      04        10        101              0.201583      16.170044       0.302487       0.273978       0.095500   -9999.000000       0.048800       0.384000
57729     57729     guizhou        107.8836       27.2231          131       152     2012      04        11        102              0.197708      19.937286       0.000000       0.264076       0.100000       0.178300       0.044300   -9999.000000
57729     57729     guizhou        107.8836       27.2231          131       152     2012      04        12        103              0.195667      19.380066       3.227137       0.260354   -9999.000000   -9999.000000   -9999.000000       0.283000
57729     57729     guizhou        107.8836       27.2231          131       152     2012      04        13        104              0.226458      18.854919       0.073891       0.264252       0.124000       0.082300   -9999.000000   -9999.000000
57729     57729     guizhou        107.8836       27.2231          131       152     2012      04        14        105              0.236000      15.367889       0.218418       0.265478       0.116500   -9999.000000       0.046300       0.272000
57729     57729     guizhou        107.8836       27.2231          131       152     2012      04        15        106              0.226375      16.197754       0.332455       0.260649       0.106000   -9999.000000       0.042000       0.349000
57729     57729     guizhou        107.8836       27.2231          131       152     2012      04        16        107              0.206000      17.738098       0.000000       0.257632       0.096500       0.059400       0.085000   -9999.000000
57729     57729     guizhou        107.8836       27.2231          131       152     2012      04        17        108              0.187375      19.904968       0.000000       0.252203   -9999.000000   -9999.000000       0.080300       0.154000
57729     57729     guizhou        107.8836       27.2231          131       152     2012      04        18        109              0.175000      17.257416       0.000000       0.251843   -9999.000000       0.207600   -9999.000000   -9999.000000
57729     57729     guizhou        107.8836       27.2231          131       152     2012      04        19        110              0.205750      20.289520       9.055943       0.248381       0.100000   -9999.000000   -9999.000000       0.454000
57729     57729     guizhou        107.8836       27.2231          131       152     2012      04        20        111              0.309708      21.037109       0.616316       0.266719       0.107500   -9999.000000       0.078500       0.598000
57729     57729     guizhou        107.8836       27.2231          131       152     2012      04        21        112              0.272625      19.364227       2.027930       0.269888       0.121500       0.305300       0.078800   -9999.000000
57729     57729     guizhou        107.8836       27.2231          131       152     2012      04        22        113              0.233333      21.792358       0.258581       0.255752   -9999.000000   -9999.000000   -9999.000000       0.251000
57729     57729     guizhou        107.8836       27.2231          131       152     2012      04        23        114              0.198750      23.944733       0.000000       0.246898   -9999.000000   -9999.000000   -9999.000000   -9999.000000
57729     57729     guizhou        107.8836       27.2231          131       152     2012      04        24        115              0.189696      25.265900       1.253271       0.242347   -9999.000000       0.335900   -9999.000000       0.346000
57729     57729     guizhou        107.8836       27.2231          131       152     2012      04        25        116              0.000000      24.968445       1.273828       0.241999       0.147000   -9999.000000   -9999.000000       0.786000
57729     57729     guizhou        107.8836       27.2231          131       152     2012      04        26        117              0.297250      17.738220       2.281421       0.253329       0.124000       0.314900       0.077200       0.365000
57729     57729     guizhou        107.8836       27.2231          131       152     2012      04        27        118              0.326750      21.367615       9.994142       0.246929       0.113000       0.203700       0.066600       0.651000
57729     57729     guizhou        107.8836       27.2231          131       152     2012      04        28        119              0.361708      22.858978       0.321167       0.264503   -9999.000000   -9999.000000       0.077800   -9999.000000
57729     57729     guizhou        107.8836       27.2231          131       152     2012      04        29        120              0.354750      21.592224      21.515919       0.274433   -9999.000000       0.388400   -9999.000000       0.557000
57729     57729     guizhou        107.8836       27.2231          131       152     2012      04        30        121              0.361417      22.116791       0.096533       0.287175       0.141000   -9999.000000   -9999.000000   -9999.000000
57729     57729     guizhou        107.8836       27.2231          131       152     2012      05        01        122              0.368458      22.564148       0.081443       0.288939       0.207500       0.234300       0.072000       0.570000
57729     57729     guizhou        107.8836       27.2231          131       152     2012      05        02        123              0.366478      20.355957       6.153036       0.275634       0.196000   -9999.000000       0.071500       0.732000
57729     57729     guizhou        107.8836       27.2231          131       152     2012      05        03        124              0.372458      20.001312       6.506166       0.277850   -9999.000000   -9999.000000       0.067800   -9999.000000
57729     57729     guizhou        107.8836       27.2231          131       152     2012      05        04        125              0.370583      19.325287       0.322454       0.285371   -9999.000000       0.181600       0.065100       0.671000
57729     57729     guizhou        107.8836       27.2231          131       152     2012      05        05        126              0.352913      19.768524       0.519404       0.282162       0.187500   -9999.000000   -9999.000000   -9999.000000
57729     57729     guizhou        107.8836       27.2231          131       152     2012      05        06        127              0.325125      22.059235       0.045193       0.270428       0.180000       0.075000   -9999.000000       0.489000
57729     57729     guizhou        107.8836       27.2231          131       152     2012      05        07        128              0.281292      25.073334       0.000000       0.262816   -9999.000000   -9999.000000       0.070500       0.556000
57729     57729     guizhou        107.8836       27.2231          131       152     2012      05        08        129              0.277682      26.870361      14.136532       0.253938   -9999.000000   -9999.000000       0.079700   -9999.000000
57729     57729     guizhou        107.8836       27.2231          131       152     2012      05        09        130              0.385583      25.996765       4.758845       0.277256   -9999.000000       0.448900       0.077200       0.701000
57729     57729     guizhou        107.8836       27.2231          131       152     2012      05        10        131              0.360542      24.912476       0.530262       0.286840       0.181500   -9999.000000   -9999.000000   -9999.000000
57729     57729     guizhou        107.8836       27.2231          131       152     2012      05        11        132              0.347792      23.677185      24.085934       0.271880       0.181000       0.213200   -9999.000000       0.515000
57729     57729     guizhou        107.8836       27.2231          131       152     2012      05        12        133              0.409625      24.505096      16.145952       0.284544       0.223500       0.229700   -9999.000000   -9999.000000
57729     57729     guizhou        107.8836       27.2231          131       152     2012      05        13        134              0.395250      22.869690      22.456385       0.325160       0.214000   -9999.000000       0.085100       0.681000
57729     57729     guizhou        107.8836       27.2231          131       152     2012      05        14        135              0.385417      20.257263       5.685348       0.307175   -9999.000000       0.298900       0.096800       0.898000
57729     57729     guizhou        107.8836       27.2231          131       152     2012      05        15        136              0.373792      19.284332       0.294126       0.304423       0.199000       0.189600       0.084900   -9999.000000
57729     57729     guizhou        107.8836       27.2231          131       152     2012      05        16        137              0.343542      20.196564       0.225518       0.288948       0.186500   -9999.000000   -9999.000000       0.393000
57729     57729     guizhou        107.8836       27.2231          131       152     2012      05        17        138              0.302792      21.516815       0.306894       0.280723       0.185500       0.287000   -9999.000000   -9999.000000
57729     57729     guizhou        107.8836       27.2231          131       152     2012      05        18        139              0.256708      23.015869       0.421898       0.276202       0.180000   -9999.000000       0.081500       0.453000
57729     57729     guizhou        107.8836       27.2231          131       152     2012      05        19        140              0.224000      24.611084       0.000000       0.272857   -9999.000000       0.142800       0.085900       0.419000
57729     57729     guizhou        107.8836       27.2231          131       152     2012      05        20        141              0.199333      24.864288       1.938726       0.271322   -9999.000000       0.328300       0.080100   -9999.000000
57729     57729     guizhou        107.8836       27.2231          131       152     2012      05        21        142              0.377375      25.454956      12.137695       0.266678       0.256500   -9999.000000   -9999.000000       0.612000
57729     57729     guizhou        107.8836       27.2231          131       152     2012      05        22        143              0.397542      20.817230      12.842313       0.286154       0.240500       0.278300   -9999.000000   -9999.000000
57729     57729     guizhou        107.8836       27.2231          131       152     2012      05        23        144              0.394292      20.316284       5.763834       0.306717   -9999.000000   -9999.000000   -9999.000000       0.874000
57729     57729     guizhou        107.8836       27.2231          131       152     2012      05        24        145              0.407913      20.051239      19.190166       0.292802   -9999.000000       0.145500       0.076000       0.843000
57729     57729     guizhou        107.8836       27.2231          131       152     2012      05        25        146              0.000000      18.929108       5.545067       0.314487   -9999.000000   -9999.000000       0.076200       0.776000
57729     57729     guizhou        107.8836       27.2231          131       152     2012      05        26        147              0.392833      18.827637       0.079608       0.301084       0.221000   -9999.000000       0.070200       0.628000
57729     57729     guizhou        107.8836       27.2231          131       152     2012      05        27        148              0.375667      21.659698       0.566401       0.287868       0.206500       0.208100   -9999.000000   -9999.000000
57729     57729     guizhou        107.8836       27.2231          131       152     2012      05        28        149              0.369522      22.974976       0.707944       0.282752       0.203000   -9999.000000   -9999.000000       0.550000
57729     57729     guizhou        107.8836       27.2231          131       152     2012      05        29        150              0.408583      22.992615      10.554039       0.281799   -9999.000000       0.124100   -9999.000000   -9999.000000
57729     57729     guizhou        107.8836       27.2231          131       152     2012      05        30        151              0.381833      22.040558       1.397093       0.299689   -9999.000000       0.088700       0.070000   -9999.000000
57729     57729     guizhou        107.8836       27.2231          131       152     2012      05        31        152              0.363208      23.558563       3.064997       0.284198       0.218000   -9999.000000       0.072700   -9999.000000
57729     57729     guizhou        107.8836       27.2231          131       152     2012      06        01        153              0.415458      20.271454      12.320190       0.285937       0.209000   -9999.000000       0.072000   -9999.000000
57729     57729     guizhou        107.8836       27.2231          131       152     2012      06        02        154              0.404417      19.071289       2.652877       0.304632       0.213000   -9999.000000   -9999.000000       0.507000
57729     57729     guizhou        107.8836       27.2231          131       152     2012      06        03        155              0.428125      20.491821      12.079599       0.289021       0.272000   -9999.000000   -9999.000000   -9999.000000
57729     57729     guizhou        107.8836       27.2231          131       152     2012      06        04        156              0.420083      19.361755       3.054080       0.305269   -9999.000000       0.220900       0.053500       0.741000
57729     57729     guizhou        107.8836       27.2231          131       152     2012      06        05        157              0.406667      19.816742       0.138435       0.296925       0.235000   -9999.000000       0.059600       0.688000
57729     57729     guizhou        107.8836       27.2231          131       152     2012      06        06        158              0.408625      20.997894      10.058997       0.287540       0.238000       0.114300       0.056200   -9999.000000
57729     57729     guizhou        107.8836       27.2231          131       152     2012      06        07        159              0.425083      21.839417      17.600700       0.291583       0.222000       0.436200   -9999.000000       0.641000
57729     57729     guizhou        107.8836       27.2231          131       152     2012      06        08        160              0.411875      21.986511       3.592977       0.313861       0.225000   -9999.000000   -9999.000000   -9999.000000
57729     57729     guizhou        107.8836       27.2231          131       152     2012      06        09        161              0.489417      23.930756       7.181289       0.298985   -9999.000000       0.218700   -9999.000000       0.582000
57729     57729     guizhou        107.8836       27.2231          131       152     2012      06        10        162              0.515167      24.718140       2.691171       0.299219       0.226000   -9999.000000       0.054100   -9999.000000
57729     57729     guizhou        107.8836       27.2231          131       152     2012      06        11        163              0.000000      24.142059       2.321882       0.297855       0.175500       0.033800       0.079900       0.662000
57729     57729     guizhou        107.8836       27.2231          131       152     2012      06        12        164              0.500875      22.742218       0.000000       0.294132       0.164000   -9999.000000       0.076300       0.660000
57729     57729     guizhou        107.8836       27.2231          131       152     2012      06        13        165              0.500625      23.112579       0.552373       0.287285       0.157000   -9999.000000   -9999.000000   -9999.000000
57729     57729     guizhou        107.8836       27.2231          131       152     2012      06        14        166              0.494417      25.249146       0.148409       0.282621   -9999.000000       0.198000   -9999.000000       0.460000
57729     57729     guizhou        107.8836       27.2231          131       152     2012      06        15        167              0.467625      23.665344       0.000000       0.279971   -9999.000000   -9999.000000       0.072000   -9999.000000
57729     57729     guizhou        107.8836       27.2231          131       152     2012      06        16        168              0.420875      25.255615       0.000000       0.275470       0.149000       0.143000       0.070200       0.396000
57729     57729     guizhou        107.8836       27.2231          131       152     2012      06        17        169              0.362250      24.883240       0.116219       0.271708       0.143000       0.145300       0.071400       0.403000
57729     57729     guizhou        107.8836       27.2231          131       152     2012      06        18        170              0.330583      25.560944       0.778599       0.269980       0.152500   -9999.000000       0.057500   -9999.000000
57729     57729     guizhou        107.8836       27.2231          131       152     2012      06        19        171              0.297000      24.476257       0.498187       0.270224   -9999.000000       0.517400   -9999.000000       0.340000
57729     57729     guizhou        107.8836       27.2231          131       152     2012      06        20        172              0.261542      23.860016       0.000000       0.271173   -9999.000000   -9999.000000   -9999.000000   -9999.000000
57729     57729     guizhou        107.8836       27.2231          131       152     2012      06        21        173              0.228833      26.339813       3.842401       0.266886       0.197000   -9999.000000       0.062800       0.588000
57729     57729     guizhou        107.8836       27.2231          131       152     2012      06        22        174              0.337083      24.880432      25.114826       0.273033       0.206000       0.297100       0.068900       0.530000
57729     57729     guizhou        107.8836       27.2231          131       152     2012      06        23        175              0.424458      22.597565       0.364592       0.313104       0.188500   -9999.000000       0.058900       0.562000
57729     57729     guizhou        107.8836       27.2231          131       152     2012      06        24        176              0.426542      24.188049       6.660701       0.290139       0.184000       0.167400   -9999.000000       0.528000
57729     57729     guizhou        107.8836       27.2231          131       152     2012      06        25        177              0.478125      26.229065      17.866800       0.284042   -9999.000000   -9999.000000   -9999.000000   -9999.000000
57729     57729     guizhou        107.8836       27.2231          131       152     2012      06        26        178              0.478773      25.442139       2.081512       0.308341       0.199000   -9999.000000   -9999.000000       0.839000
57729     57729     guizhou        107.8836       27.2231          131       152     2012      06        27        179              0.478292      24.859894       1.642375       0.297912       0.190500       0.309200       0.059000   -9999.000000
57729     57729     guizhou        107.8836       27.2231          131       152     2012      06        28        180              0.469708      26.744080       0.171118       0.286285       0.190500   -9999.000000       0.060000       0.569000
57729     57729     guizhou        107.8836       27.2231          131       152     2012      06        29        181              0.450083      26.416779       1.428276       0.279364       0.178000       0.029800       0.055400       0.624000
57729     57729     guizhou        107.8836       27.2231          131       152     2012      06        30        182              0.411792      28.110413       0.243795       0.273405   -9999.000000   -9999.000000   -9999.000000   -9999.000000
57729     57729     guizhou        107.8836       27.2231          131       152     2012      07        01        183              0.404000      29.416840       0.192359       0.268564       0.239000   -9999.000000   -9999.000000       0.552000
57729     57729     guizhou        107.8836       27.2231          131       152     2012      07        02        184              0.358750      27.820557       0.000000       0.267874       0.243500       0.180900       0.069100   -9999.000000
57729     57729     guizhou        107.8836       27.2231          131       152     2012      07        03        185              0.291250      27.400696       0.000000       0.264610       0.245000   -9999.000000       0.069000       0.449000
57729     57729     guizhou        107.8836       27.2231          131       152     2012      07        04        186              0.230583      28.038940       0.000000       0.261052       0.240000   -9999.000000       0.071800       0.485000
57729     57729     guizhou        107.8836       27.2231          131       152     2012      07        05        187              0.187167      28.008514       0.458705       0.257354   -9999.000000       0.141400       0.066700   -9999.000000
57729     57729     guizhou        107.8836       27.2231          131       152     2012      07        06        188              0.150917      28.248138       0.000000       0.257686   -9999.000000   -9999.000000   -9999.000000       0.376000
57729     57729     guizhou        107.8836       27.2231          131       152     2012      07        07        189              0.117625      29.104919       0.000000       0.252632   -9999.000000       0.316400   -9999.000000   -9999.000000
57729     57729     guizhou        107.8836       27.2231          131       152     2012      07        08        190              0.150875      28.808899       0.000000       0.249819       0.227500   -9999.000000       0.065600       0.363000
57729     57729     guizhou        107.8836       27.2231          131       152     2012      07        09        191              0.132833      28.776855       0.000000       0.245061       0.223000   -9999.000000       0.088400   -9999.000000
57729     57729     guizhou        107.8836       27.2231          131       152     2012      07        10        192              0.107375      28.726074       0.000000       0.241663       0.209000       0.206400       0.084200       0.389000
57729     57729     guizhou        107.8836       27.2231          131       152     2012      07        11        193              0.117625      29.743195       2.205416       0.238725   -9999.000000   -9999.000000   -9999.000000       0.458000
57729     57729     guizhou        107.8836       27.2231          131       152     2012      07        12        194              0.383333      30.374237      48.959595       0.237636       0.326000       0.311900   -9999.000000   -9999.000000
57729     57729     guizhou        107.8836       27.2231          131       152     2012      07        13        195              0.392250      27.883545      16.791483       0.314765       0.301500   -9999.000000   -9999.000000       0.583000
57729     57729     guizhou        107.8836       27.2231          131       152     2012      07        14        196              0.381750      26.027924       4.738604       0.312582       0.269000   -9999.000000       0.094600   -9999.000000
57729     57729     guizhou        107.8836       27.2231          131       152     2012      07        15        197              0.405958      28.539673      10.823668       0.288761       0.294000       0.105900       0.095800       0.773000
57729     57729     guizhou        107.8836       27.2231          131       152     2012      07        16        198              0.421000      25.727509      12.728775       0.301201   -9999.000000   -9999.000000       0.108000       0.840000
57729     57729     guizhou        107.8836       27.2231          131       152     2012      07        17        199              0.423833      25.868164      26.453810       0.303775   -9999.000000       0.152400   -9999.000000   -9999.000000
57729     57729     guizhou        107.8836       27.2231          131       152     2012      07        18        200              0.426250      24.992493      11.050876       0.320134       0.315000   -9999.000000   -9999.000000       0.773000
57729     57729     guizhou        107.8836       27.2231          131       152     2012      07        19        201              0.417333      26.007324       5.285308       0.303313       0.280500   -9999.000000       0.107000   -9999.000000
57729     57729     guizhou        107.8836       27.2231          131       152     2012      07        20        202              0.407083      27.342041       0.000000       0.301633       0.261500       0.141900       0.110400       0.541000
57729     57729     guizhou        107.8836       27.2231          131       152     2012      07        21        203              0.377958      28.828094       0.000000       0.285501   -9999.000000   -9999.000000       0.103100       0.575000
57729     57729     guizhou        107.8836       27.2231          131       152     2012      07        22        204              0.337875      28.990234       3.786976       0.279705   -9999.000000       0.225000   -9999.000000       0.445000
57729     57729     guizhou        107.8836       27.2231          131       152     2012      07        23        205              0.394435      28.837158      32.237778       0.280573   -9999.000000       0.225400   -9999.000000       0.692000
57729     57729     guizhou        107.8836       27.2231          131       152     2012      07        24        206              0.428625      26.747162       5.168672       0.316850       0.367500   -9999.000000   -9999.000000   -9999.000000
57729     57729     guizhou        107.8836       27.2231          131       152     2012      07        25        207              0.428792      26.308807       6.528511       0.305881       0.410000       0.332000       0.094900       0.740000
57729     57729     guizhou        107.8836       27.2231          131       152     2012      07        26        208              0.427583      26.800690       1.796697       0.301449       0.321000       0.129400       0.097000   -9999.000000
57729     57729     guizhou        107.8836       27.2231          131       152     2012      07        27        209              0.433750      27.829773       9.062794       0.293074   -9999.000000   -9999.000000       0.080700       0.566000
57729     57729     guizhou        107.8836       27.2231          131       152     2012      07        28        210              0.431750      27.100006       6.575294       0.300745       0.371000       0.328000   -9999.000000       0.623000
57729     57729     guizhou        107.8836       27.2231          131       152     2012      07        29        211              0.428000      26.988708       0.400573       0.299264       0.347000   -9999.000000   -9999.000000   -9999.000000
57729     57729     guizhou        107.8836       27.2231          131       152     2012      07        30        212              0.415167      27.715515       0.000000       0.287585       0.353000       0.330000   -9999.000000       0.563000
57729     57729     guizhou        107.8836       27.2231          131       152     2012      07        31        213              0.396333      28.730408       1.480716       0.279386       0.331000       0.163900       0.114400   -9999.000000
57729     57729     guizhou        107.8836       27.2231          131       152     2012      08        01        214              0.435667      29.280762      10.475325       0.276756   -9999.000000   -9999.000000       0.123700       0.514000
57729     57729     guizhou        107.8836       27.2231          131       152     2012      08        02        215              0.431083      27.707062       0.129747       0.300078   -9999.000000       0.305500       0.109500       0.523000
57729     57729     guizhou        107.8836       27.2231          131       152     2012      08        03        216              0.391750      28.414795       0.000000       0.278818       0.278000   -9999.000000   -9999.000000   -9999.000000
57729     57729     guizhou        107.8836       27.2231          131       152     2012      08        04        217              0.314667      28.226929       0.160667       0.271519       0.296000       0.141300   -9999.000000       0.428000
57729     57729     guizhou        107.8836       27.2231          131       152     2012      08        05        218              0.329083      28.232422      20.556250       0.267433       0.340500   -9999.000000       0.127000   -9999.000000
57729     57729     guizhou        107.8836       27.2231          131       152     2012      08        06        219              0.360500      26.686554       4.935913       0.304614       0.392000   -9999.000000       0.155200       0.615000
57729     57729     guizhou        107.8836       27.2231          131       152     2012      08        07        220              0.366417      24.796783       1.526669       0.297498   -9999.000000       0.320200       0.145300   -9999.000000
57729     57729     guizhou        107.8836       27.2231          131       152     2012      08        08        221              0.329875      26.495575       0.000000       0.287956       0.326000   -9999.000000   -9999.000000       0.498000
57729     57729     guizhou        107.8836       27.2231          131       152     2012      08        09        222              0.269292      28.158295       1.914355       0.275475       0.303000       0.194600   -9999.000000       0.530000
57729     57729     guizhou        107.8836       27.2231          131       152     2012      08        10        223              0.208208      28.942963       0.000000       0.269656       0.310500   -9999.000000   -9999.000000   -9999.000000
57729     57729     guizhou        107.8836       27.2231          131       152     2012      08        11        224              0.159292      29.016815       0.000000       0.266244       0.228000   -9999.000000       0.140600       0.408000
57729     57729     guizhou        107.8836       27.2231          131       152     2012      08        12        225              0.126167      29.290497       0.886541       0.262732   -9999.000000       0.293400       0.142600   -9999.000000
57729     57729     guizhou        107.8836       27.2231          131       152     2012      08        13        226              0.106583      29.661407       4.628561       0.263218   -9999.000000   -9999.000000       0.114400       0.507000
57729     57729     guizhou        107.8836       27.2231          131       152     2012      08        14        227              0.100708      28.000519       2.686378       0.274008       0.258000   -9999.000000   -9999.000000       0.511000
57729     57729     guizhou        107.8836       27.2231          131       152     2012      08        15        228              0.092500      28.429840       3.884756       0.274229       0.275000       0.029500   -9999.000000   -9999.000000
57729     57729     guizhou        107.8836       27.2231          131       152     2012      08        16        229              0.084917      28.208832       0.268528       0.276858       0.252500   -9999.000000       0.116600       0.387000
57729     57729     guizhou        107.8836       27.2231          131       152     2012      08        17        230              0.076750      29.178375       0.000000       0.266619   -9999.000000       0.180900       0.115600   -9999.000000
57729     57729     guizhou        107.8836       27.2231          131       152     2012      08        18        231              0.082042      28.582550       0.673833       0.260055   -9999.000000       0.068900       0.118500       0.540000
57729     57729     guizhou        107.8836       27.2231          131       152     2012      08        19        232              0.076292      28.413635       0.398557       0.257916       0.272000   -9999.000000       0.111900       0.449000
57729     57729     guizhou        107.8836       27.2231          131       152     2012      08        20        233              0.158500      28.940887      18.027710       0.253939       0.214000       0.219800   -9999.000000       0.537000
57729     57729     guizhou        107.8836       27.2231          131       152     2012      08        21        234              0.341083      29.307831       8.150516       0.273178       0.331000   -9999.000000   -9999.000000       0.644000
57729     57729     guizhou        107.8836       27.2231          131       152     2012      08        22        235              0.342417      26.023407       0.427720       0.291487       0.348000       0.146600       0.106900   -9999.000000
57729     57729     guizhou        107.8836       27.2231          131       152     2012      08        23        236              0.332625      23.691864       0.000000       0.280471   -9999.000000   -9999.000000       0.114600       0.358000
57729     57729     guizhou        107.8836       27.2231          131       152     2012      08        24        237              0.306042      24.458801       0.000000       0.266723   -9999.000000   -9999.000000       0.109200   -9999.000000
57729     57729     guizhou        107.8836       27.2231          131       152     2012      08        25        238              0.000000      25.178680       0.000000       0.260608       0.311500       0.154800   -9999.000000       0.326000
57729     57729     guizhou        107.8836       27.2231          131       152     2012      08        26        239              0.247167      25.382355       0.000000       0.257807       0.312500   -9999.000000   -9999.000000       0.457000
57729     57729     guizhou        107.8836       27.2231          131       152     2012      08        27        240              0.221917      26.177795       0.000000       0.254138       0.306500       0.075000   -9999.000000   -9999.000000
57729     57729     guizhou        107.8836       27.2231          131       152     2012      08        28        241              0.203292      26.814301       0.982773       0.250149   -9999.000000       0.115700       0.114700       0.431000
57729     57729     guizhou        107.8836       27.2231          131       152     2012      08        29        242              0.325833      27.213318       5.687178       0.249778   -9999.000000   -9999.000000       0.121200   -9999.000000
57729     57729     guizhou        107.8836       27.2231          131       152     2012      08        30        243              0.379875      25.418823       1.148133       0.271499       0.304500       0.170900       0.116100       0.496000
57729     57729     guizhou        107.8836       27.2231          131       152     2012      08        31        244              0.373292      27.311218       0.000000       0.262879       0.296000   -9999.000000   -9999.000000       0.489000
57729     57729     guizhou        107.8836       27.2231          131       152     2012      09        01        245              0.354708      27.965271       4.064238       0.253489       0.235000       0.213300   -9999.000000   -9999.000000
57729     57729     guizhou        107.8836       27.2231          131       152     2012      09        02        246              0.315625      28.095123       3.591903       0.253351       0.219000       0.176900       0.121200       0.425000
57729     57729     guizhou        107.8836       27.2231          131       152     2012      09        03        247              0.280917      25.359589       0.490838       0.271598   -9999.000000   -9999.000000       0.156500   -9999.000000
57729     57729     guizhou        107.8836       27.2231          131       152     2012      09        04        248              0.262917      22.858856       0.000000       0.261052       0.246000       0.136800       0.148100       0.309000
57729     57729     guizhou        107.8836       27.2231          131       152     2012      09        05        249              0.223458      24.913696       0.000000       0.251342       0.229500       0.095200       0.146200   -9999.000000
57729     57729     guizhou        107.8836       27.2231          131       152     2012      09        06        250              0.194500      24.638336       0.000000       0.248258       0.233500   -9999.000000   -9999.000000       0.394000
57729     57729     guizhou        107.8836       27.2231          131       152     2012      09        07        251              0.151667      26.178040       0.000000       0.244765       0.207000       0.262200   -9999.000000       0.461000
57729     57729     guizhou        107.8836       27.2231          131       152     2012      09        08        252              0.145542      27.619049       0.000000       0.239765   -9999.000000   -9999.000000       0.152200   -9999.000000
57729     57729     guizhou        107.8836       27.2231          131       152     2012      09        09        253              0.139792      28.049103       1.082533       0.235851   -9999.000000       0.122400       0.158900       0.303000
57729     57729     guizhou        107.8836       27.2231          131       152     2012      09        10        254              0.122333      28.397583       0.000000       0.234281       0.243000       0.168300       0.187400   -9999.000000
57729     57729     guizhou        107.8836       27.2231          131       152     2012      09        11        255              0.111250      27.181305       1.827052       0.234862       0.150500   -9999.000000   -9999.000000       0.359000
57729     57729     guizhou        107.8836       27.2231          131       152     2012      09        12        256              0.103625      27.286926      10.434645       0.234240       0.176000       0.157100   -9999.000000       0.607000
57729     57729     guizhou        107.8836       27.2231          131       152     2012      09        13        257              0.119125      22.682709       3.336913       0.276925   -9999.000000   -9999.000000   -9999.000000   -9999.000000
57729     57729     guizhou        107.8836       27.2231          131       152     2012      09        14        258              0.132458      19.789734       0.000000       0.273119   -9999.000000       0.338300       0.187100       0.214000
57729     57729     guizhou        107.8836       27.2231          131       152     2012      09        15        259              0.137708      22.072357       0.801053       0.256318       0.148000       0.078300       0.164400   -9999.000000
57729     57729     guizhou        107.8836       27.2231          131       152     2012      09        16        260              0.149375      22.602783       8.567251       0.250304       0.167000   -9999.000000       0.206300       0.491000
57729     57729     guizhou        107.8836       27.2231          131       152     2012      09        17        261              0.177500      18.523682       0.000000       0.279530       0.168500       0.139800   -9999.000000       0.394000
57729     57729     guizhou        107.8836       27.2231          131       152     2012      09        18        262              0.182875      19.903625       0.561152       0.264249   -9999.000000   -9999.000000   -9999.000000       0.338000
57729     57729     guizhou        107.8836       27.2231          131       152     2012      09        19        263              0.190125      20.610779       0.156372       0.259447   -9999.000000       0.120200       0.150100       0.418000
57729     57729     guizhou        107.8836       27.2231          131       152     2012      09        20        264              0.193750      23.263489      12.233789       0.252929   -9999.000000       0.337300       0.162200   -9999.000000
57729     57729     guizhou        107.8836       27.2231          131       152     2012      09        21        265              0.290167      20.986633       3.794320       0.282621   -9999.000000   -9999.000000       0.157800       0.674000
57729     57729     guizhou        107.8836       27.2231          131       152     2012      09        22        266              0.325042      20.915955      16.686359       0.283784       0.211500       0.469200       0.148000   -9999.000000
57729     57729     guizhou        107.8836       27.2231          131       152     2012      09        23        267              0.359625      20.934723       8.956311       0.302812       0.227000       0.173600   -9999.000000       0.711000
57729     57729     guizhou        107.8836       27.2231          131       152     2012      09        24        268              0.363875      19.969818       3.445912       0.302264   -9999.000000   -9999.000000   -9999.000000       0.663000
57729     57729     guizhou        107.8836       27.2231          131       152     2012      09        25        269              0.358417      20.054871       0.614649       0.288500   -9999.000000       0.302300       0.110400   -9999.000000
57729     57729     guizhou        107.8836       27.2231          131       152     2012      09        26        270              0.365792      20.999878       2.903480       0.278557       0.220000   -9999.000000       0.103300       0.664000
57729     57729     guizhou        107.8836       27.2231          131       152     2012      09        27        271              0.361429      21.352356       0.584357       0.278562       0.204500       0.233800       0.100100   -9999.000000
57729     57729     guizhou        107.8836       27.2231          131       152     2012      09        28        272              0.357267      21.421692       0.000000       0.273223       0.189000   -9999.000000   -9999.000000       0.436000
57729     57729     guizhou        107.8836       27.2231          131       152     2012      09        29        273              0.354208      21.920654       0.075412       0.265619       0.177000   -9999.000000   -9999.000000       0.517000
57729     57729     guizhou        107.8836       27.2231          131       152     2012      09        30        274              0.339917      22.342957       0.455231       0.259014   -9999.000000       0.228500   -9999.000000   -9999.000000
57729     57729     guizhou        107.8836       27.2231          131       152     2012      10        01        275              0.320542      21.834961       0.000000       0.254550       0.089000   -9999.000000       0.120900       0.351000
57729     57729     guizhou        107.8836       27.2231          131       152     2012      10        02        276              0.288458      22.480835       3.870068       0.250989       0.092000       0.191500       0.130400   -9999.000000
57729     57729     guizhou        107.8836       27.2231          131       152     2012      10        03        277              0.265000      22.466431       5.115846       0.256070       0.105500       0.244000       0.123300       0.568000
57729     57729     guizhou        107.8836       27.2231          131       152     2012      10        04        278              0.371125      19.145203      11.942080       0.275564       0.108000   -9999.000000   -9999.000000   -9999.000000
57729     57729     guizhou        107.8836       27.2231          131       152     2012      10        05        279              0.378750      18.030151       4.259386       0.296888   -9999.000000       0.167400   -9999.000000       0.666000
57729     57729     guizhou        107.8836       27.2231          131       152     2012      10        06        280              0.370125      17.896362       0.478528       0.288678   -9999.000000   -9999.000000       0.130200       0.802000
57729     57729     guizhou        107.8836       27.2231          131       152     2012      10        07        281              0.365375      17.952271       0.104624       0.276586       0.112500       0.135500       0.133100   -9999.000000
57729     57729     guizhou        107.8836       27.2231          131       152     2012      10        08        282              0.376125      17.803406       2.957816       0.271099       0.111500       0.252100       0.071800       0.587000
57729     57729     guizhou        107.8836       27.2231          131       152     2012      10        09        283              0.375917      17.423187       0.376421       0.272432       0.099500   -9999.000000   -9999.000000   -9999.000000
57729     57729     guizhou        107.8836       27.2231          131       152     2012      10        10        284              0.369750      18.149506       0.099702       0.274426   -9999.000000       0.306600   -9999.000000       0.489000
57729     57729     guizhou        107.8836       27.2231          131       152     2012      10        11        285              0.362167      19.052795       0.000000       0.267560   -9999.000000       0.205000   -9999.000000       0.493000
57729     57729     guizhou        107.8836       27.2231          131       152     2012      10        12        286              0.365625      17.692108       5.040947       0.264736       0.183000   -9999.000000       0.073100   -9999.000000
57729     57729     guizhou        107.8836       27.2231          131       152     2012      10        13        287              0.377667      17.011444       1.793712       0.270728       0.171500       0.198200       0.081000       0.503000
57729     57729     guizhou        107.8836       27.2231          131       152     2012      10        14        288              0.380417      17.414703       0.565030       0.277936       0.178500   -9999.000000       0.074000   -9999.000000
57729     57729     guizhou        107.8836       27.2231          131       152     2012      10        15        289              0.379292      17.291779       1.685687       0.273917       0.158000       0.229600   -9999.000000       0.639000
57729     57729     guizhou        107.8836       27.2231          131       152     2012      10        16        290              0.382458      17.603851       0.850687       0.270267   -9999.000000       0.261000   -9999.000000       0.666000
57729     57729     guizhou        107.8836       27.2231          131       152     2012      10        17        291              0.373667      19.061493       0.000000       0.272077   -9999.000000   -9999.000000       0.146200       0.293000
57729     57729     guizhou        107.8836       27.2231          131       152     2012      10        18        292              0.362792      18.462402       0.000000       0.262685       0.144000       0.207500       0.138900       0.445000
57729     57729     guizhou        107.8836       27.2231          131       152     2012      10        19        293              0.349000      19.494965       0.330447       0.258456       0.153500   -9999.000000       0.151200   -9999.000000
57729     57729     guizhou        107.8836       27.2231          131       152     2012      10        20        294              0.346083      18.966339       0.000000       0.259618       0.148000       0.105000       0.139400       0.454000
57729     57729     guizhou        107.8836       27.2231          131       152     2012      10        21        295              0.360208      20.997162       3.967698       0.258125   -9999.000000       0.150100   -9999.000000   -9999.000000
57729     57729     guizhou        107.8836       27.2231          131       152     2012      10        22        296              0.373250      23.149170       6.251145       0.262487   -9999.000000   -9999.000000   -9999.000000       0.498000
57729     57729     guizhou        107.8836       27.2231          131       152     2012      10        23        297              0.367542      18.630127       0.875945       0.282231   -9999.000000       0.136500       0.087100       0.368000
57729     57729     guizhou        107.8836       27.2231          131       152     2012      10        24        298              0.363333      17.652130       1.869254       0.269350   -9999.000000   -9999.000000       0.089600   -9999.000000
57729     57729     guizhou        107.8836       27.2231          131       152     2012      10        25        299              0.000000      16.216400       0.062645       0.273309       0.178000       0.108100       0.085200       0.437000
57729     57729     guizhou        107.8836       27.2231          131       152     2012      10        26        300              0.372000      16.945038       0.050842       0.267279       0.179000       0.163100   -9999.000000   -9999.000000
57729     57729     guizhou        107.8836       27.2231          131       152     2012      10        27        301              0.369708      17.055450       0.000000       0.264949   -9999.000000   -9999.000000   -9999.000000       0.412000
57729     57729     guizhou        107.8836       27.2231          131       152     2012      10        28        302              0.000000      18.157806       0.634467       0.262773       0.181000       0.229700   -9999.000000       0.511000
57729     57729     guizhou        107.8836       27.2231          131       152     2012      10        29        303              0.370167      19.685394       8.072587       0.262070       0.194000       0.200900       0.127400   -9999.000000
57729     57729     guizhou        107.8836       27.2231          131       152     2012      10        30        304              0.377458      18.924286       0.071528       0.281463       0.176000   -9999.000000       0.133000       0.384000
57729     57729     guizhou        107.8836       27.2231          131       152     2012      10        31        305              0.369042      16.419281       0.000000       0.272453       0.169000       0.315100       0.125000   -9999.000000
57729     57729     guizhou        107.8836       27.2231          131       152     2012      11        01        306              0.358333      17.069336       0.000000       0.264522   -9999.000000   -9999.000000   -9999.000000       0.274000
57729     57729     guizhou        107.8836       27.2231          131       152     2012      11        02        307              0.340292      16.974915       1.187230       0.261014   -9999.000000       0.093800   -9999.000000   -9999.000000
57729     57729     guizhou        107.8836       27.2231          131       152     2012      11        03        308              0.338417      18.189026       2.541385       0.260608       0.146000       0.077100       0.124900       0.374000
57729     57729     guizhou        107.8836       27.2231          131       152     2012      11        04        309              0.334125      17.523499       1.814536       0.270633       0.145500   -9999.000000       0.136700       0.412000
57729     57729     guizhou        107.8836       27.2231          131       152     2012      11        05        310              0.364042      16.788849       6.192205       0.264491       0.159000       0.269000       0.072200   -9999.000000
57729     57729     guizhou        107.8836       27.2231          131       152     2012      11        06        311              0.378208      13.744659      11.510603       0.283635       0.158000   -9999.000000       0.072400       0.655000
57729     57729     guizhou        107.8836       27.2231          131       152     2012      11        07        312              0.388375      13.503143       3.303048       0.291770   -9999.000000       0.101600   -9999.000000   -9999.000000
57729     57729     guizhou        107.8836       27.2231          131       152     2012      11        08        313              0.387261      13.021088       0.174918       0.288587       0.176000       0.142400   -9999.000000       0.437000
57729     57729     guizhou        107.8836       27.2231          131       152     2012      11        09        314              0.386208      12.880127       0.592078       0.278365       0.176500   -9999.000000       0.074100       0.492000
57729     57729     guizhou        107.8836       27.2231          131       152     2012      11        10        315              0.382083      11.755035       0.447311       0.273993       0.157000       0.216300       0.075700   -9999.000000
57729     57729     guizhou        107.8836       27.2231          131       152     2012      11        11        316              0.374125      13.613953       0.000000       0.270244       0.118000   -9999.000000       0.068400       0.246000
57729     57729     guizhou        107.8836       27.2231          131       152     2012      11        12        317              0.364500      14.277039       0.108130       0.266110   -9999.000000       0.122400   -9999.000000   -9999.000000
57729     57729     guizhou        107.8836       27.2231          131       152     2012      11        13        318              0.000000      12.805634       0.000000       0.265412   -9999.000000       0.242400   -9999.000000       0.358000
57729     57729     guizhou        107.8836       27.2231          131       152     2012      11        14        319              0.355708      14.563049       0.746609       0.263882       0.138000   -9999.000000   -9999.000000       0.322000
57729     57729     guizhou        107.8836       27.2231          131       152     2012      11        15        320              0.372458      15.179779       3.421819       0.265095       0.139000       0.361200       0.134300       0.512000
57729     57729     guizhou        107.8836       27.2231          131       152     2012      11        16        321              0.389042      13.593201       5.347805       0.272768       0.129000       0.102900       0.136400       0.577000
57729     57729     guizhou        107.8836       27.2231          131       152     2012      11        17        322              0.000000      11.521179       0.000000       0.285659   -9999.000000   -9999.000000       0.130000   -9999.000000
57729     57729     guizhou        107.8836       27.2231          131       152     2012      11        18        323              0.377125      13.448914       0.224682       0.271640   -9999.000000       0.309500   -9999.000000       0.381000
57729     57729     guizhou        107.8836       27.2231          131       152     2012      11        19        324              0.368167      14.444794       0.096000       0.267245       0.137000   -9999.000000   -9999.000000   -9999.000000
57729     57729     guizhou        107.8836       27.2231          131       152     2012      11        20        325              0.362333      12.890808       0.497429       0.266119       0.143500       0.216900       0.065000       0.421000
57729     57729     guizhou        107.8836       27.2231          131       152     2012      11        21        326              0.363000      11.831268       0.340112       0.266735       0.108500       0.289800       0.063800       0.377000
57729     57729     guizhou        107.8836       27.2231          131       152     2012      11        22        327              0.364000      12.034821       0.364570       0.266336       0.109000   -9999.000000       0.062300   -9999.000000
57729     57729     guizhou        107.8836       27.2231          131       152     2012      11        23        328              0.361333      11.155182       0.590422       0.266281   -9999.000000       0.252100   -9999.000000       0.290000
57729     57729     guizhou        107.8836       27.2231          131       152     2012      11        24        329              0.356042       9.637512       0.093863       0.264116       0.123000   -9999.000000   -9999.000000   -9999.000000
57729     57729     guizhou        107.8836       27.2231          131       152     2012      11        25        330              0.358542       8.646240       1.911070       0.263600       0.110000       0.090100   -9999.000000       0.254000
57729     57729     guizhou        107.8836       27.2231          131       152     2012      11        26        331              0.356042       9.120728       0.154936       0.266201       0.105500       0.164900   -9999.000000       0.272000
57729     57729     guizhou        107.8836       27.2231          131       152     2012      11        27        332              0.357708       8.621124       0.359321       0.268730       0.108000   -9999.000000       0.053000   -9999.000000
57729     57729     guizhou        107.8836       27.2231          131       152     2012      11        28        333              0.363083       8.122620       0.090792       0.266091   -9999.000000       0.148400       0.050800       0.284000
57729     57729     guizhou        107.8836       27.2231          131       152     2012      11        29        334              0.363625       9.408234       0.240621       0.264917   -9999.000000   -9999.000000   -9999.000000   -9999.000000
57729     57729     guizhou        107.8836       27.2231          131       152     2012      11        30        335              0.374083       8.122986       2.673945       0.264749       0.118000       0.128900   -9999.000000       0.423000
57729     57729     guizhou        107.8836       27.2231          131       152     2012      12        01        336              0.378708       7.142303       0.104270       0.269697       0.125500       0.166700   -9999.000000   -9999.000000
57729     57729     guizhou        107.8836       27.2231          131       152     2012      12        02        337              0.374208       7.417511       0.114555       0.269779       0.114000   -9999.000000       0.050600       0.223000
57729     57729     guizhou        107.8836       27.2231          131       152     2012      12        03        338              0.367375       9.009247       0.173918       0.265795       0.126000       0.363900       0.073000       0.272000
57729     57729     guizhou        107.8836       27.2231          131       152     2012      12        04        339              0.362000      10.151215       0.295593       0.262883   -9999.000000       0.213800       0.068500   -9999.000000
57729     57729     guizhou        107.8836       27.2231          131       152     2012      12        05        340              0.357750       7.760986       0.000000       0.263470   -9999.000000   -9999.000000   -9999.000000       0.068000
57729     57729     guizhou        107.8836       27.2231          131       152     2012      12        06        341              0.342583      10.389893       0.000000       0.260541       0.122500       0.111000   -9999.000000   -9999.000000
57729     57729     guizhou        107.8836       27.2231          131       152     2012      12        07        342              0.328833      10.201080       0.000000       0.259251       0.122000   -9999.000000       0.065600       0.168000
57729     57729     guizhou        107.8836       27.2231          131       152     2012      12        08        343              0.324000       8.753143       0.919356       0.259890       0.119000       0.202800       0.071100       0.219000
57729     57729     guizhou        107.8836       27.2231          131       152     2012      12        09        344              0.374583      10.112885      12.486991       0.261353   -9999.000000       0.143500       0.069200   -9999.000000
57729     57729     guizhou        107.8836       27.2231          131       152     2012      12        10        345              0.379125       7.693207       0.195193       0.283019   -9999.000000   -9999.000000   -9999.000000       0.156000
57729     57729     guizhou        107.8836       27.2231          131       152     2012      12        11        346              0.373250       6.328094       0.597903       0.283588       0.135000       0.243700   -9999.000000   -9999.000000
57729     57729     guizhou        107.8836       27.2231          131       152     2012      12        12        347              0.378125       6.746796       0.362148       0.274300       0.140000   -9999.000000   -9999.000000       0.328000
57729     57729     guizhou        107.8836       27.2231          131       152     2012      12        13        348              0.380167       6.358185       0.000000       0.271803       0.119000       0.193100       0.041200       0.402000
57729     57729     guizhou        107.8836       27.2231          131       152     2012      12        14        349              0.378375      10.557068       0.293848       0.268618   -9999.000000       0.153400       0.047300       0.262000
57729     57729     guizhou        107.8836       27.2231          131       152     2012      12        15        350              0.000000      10.779724       0.062263       0.266214   -9999.000000   -9999.000000       0.040900       0.260000
57729     57729     guizhou        107.8836       27.2231          131       152     2012      12        16        351              0.374500       9.094330       0.307354       0.265243       0.131000       0.139100   -9999.000000   -9999.000000
57729     57729     guizhou        107.8836       27.2231          131       152     2012      12        17        352              0.372625       8.540924       0.126619       0.264365       0.133500   -9999.000000   -9999.000000       0.168000
57729     57729     guizhou        107.8836       27.2231          131       152     2012      12        18        353              0.367833       6.413940       0.000000       0.263966       0.124000       0.095500       0.058700   -9999.000000
57729     57729     guizhou        107.8836       27.2231          131       152     2012      12        19        354              0.370667       5.324554       1.858842       0.262851       0.140000       0.142500       0.061000       0.222000
57729     57729     guizhou        107.8836       27.2231          131       152     2012      12        20        355              0.000000       4.045074       1.475052       0.264780   -9999.000000   -9999.000000       0.058500       0.351000
57729     57729     guizhou        107.8836       27.2231          131       152     2012      12        21        356              0.377750       3.316437       0.219343       0.269940   -9999.000000       0.224700       0.055400   -9999.000000
57729     57729     guizhou        107.8836       27.2231          131       152     2012      12        22        357              0.374708       4.012604       0.000000       0.266147   -9999.000000   -9999.000000   -9999.000000       0.202000
57729     57729     guizhou        107.8836       27.2231          131       152     2012      12        23        358              0.369833       3.763702       0.000000       0.263535       0.108000   -9999.000000   -9999.000000   -9999.000000
57729     57729     guizhou        107.8836       27.2231          131       152     2012      12        24        359              0.365421       4.991089       3.789521       0.260605       0.102500       0.169800       0.072100       0.102000
57729     57729     guizhou        107.8836       27.2231          131       152     2012      12        25        360              0.368333       6.797333       2.310347       0.271914   -9999.000000   -9999.000000       0.077000       0.079000
57729     57729     guizhou        107.8836       27.2231          131       152     2012      12        26        361              0.000000       3.932434       0.429803       0.270742   -9999.000000   -9999.000000       0.071600   -9999.000000
57729     57729     guizhou        107.8836       27.2231          131       152     2012      12        27        362              0.377429       2.580292       0.884237       0.268710       0.118000   -9999.000000   -9999.000000       0.277000
57729     57729     guizhou        107.8836       27.2231          131       152     2012      12        28        363              0.377000       2.856812       5.545488       0.268026       0.122000   -9999.000000   -9999.000000   -9999.000000
57729     57729     guizhou        107.8836       27.2231          131       152     2012      12        29        364              0.000000       3.149109       3.601548       0.276030   -9999.000000   -9999.000000   -9999.000000       0.124000
57729     57729     guizhou        107.8836       27.2231          131       152     2012      12        30        365              0.000000       2.134491       2.690046       0.279219   -9999.000000   -9999.000000       0.065100   -9999.000000
57729     57729     guizhou        107.8836       27.2231          131       152     2012      12        31        366              0.367933       3.345215       1.416023       0.276638   -9999.000000       0.291700       0.058000   -9999.000000
