# Supplementary material for: Research on Fusing Multisatellite Soil Moisture Data Based on Bayesian Model Averaging
Source: Hindawi journal article supplement (doi:10.1155/2018/9310838), 2018-06-25
Supplement: f1 [file 9310838.f1.zip › 2012_sm00-10cm_daily_ZDB_ZHY_57731_366days_allin.txt]

57731     57731     guizhou        108.2506       27.9433          128       153     2012      01        01        001              0.000000   -9999.000000       0.000000   -9999.000000       0.080000   -9999.000000   -9999.000000   -9999.000000
57731     57731     guizhou        108.2506       27.9433          128       153     2012      01        02        002              0.177000       4.737762       2.790758       0.268500       0.086000       0.169600   -9999.000000       0.199000
57731     57731     guizhou        108.2506       27.9433          128       153     2012      01        03        003              0.000000       4.488434       2.375137       0.274754   -9999.000000   -9999.000000   -9999.000000   -9999.000000
57731     57731     guizhou        108.2506       27.9433          128       153     2012      01        04        004              0.201923       2.598297       0.000000       0.276120   -9999.000000   -9999.000000       0.040000       0.016000
57731     57731     guizhou        108.2506       27.9433          128       153     2012      01        05        005              0.205385       2.462433       2.710456       0.261528   -9999.000000       0.138400       0.040300   -9999.000000
57731     57731     guizhou        108.2506       27.9433          128       153     2012      01        06        006              0.198000       1.404510       0.763627       0.250266   -9999.000000   -9999.000000       0.040700       0.145000
57731     57731     guizhou        108.2506       27.9433          128       153     2012      01        07        007              0.195000       2.224640       0.000000       0.260537       0.088000       0.017600   -9999.000000       0.110000
57731     57731     guizhou        108.2506       27.9433          128       153     2012      01        08        008              0.000000       2.374451       3.047372       0.263288   -9999.000000   -9999.000000   -9999.000000   -9999.000000
57731     57731     guizhou        108.2506       27.9433          128       153     2012      01        09        009              0.195000       3.381073       1.269482       0.266246   -9999.000000       0.047200   -9999.000000       0.162000
57731     57731     guizhou        108.2506       27.9433          128       153     2012      01        10        010              0.194800       3.822357       1.056373       0.268491       0.086500       0.024700       0.039400   -9999.000000
57731     57731     guizhou        108.2506       27.9433          128       153     2012      01        11        011              0.000000       3.630127       0.597172       0.268084       0.068000   -9999.000000       0.038400       0.140000
57731     57731     guizhou        108.2506       27.9433          128       153     2012      01        12        012              0.201000       2.717377       1.800721       0.266936       0.071000       0.110400       0.036700       0.203000
57731     57731     guizhou        108.2506       27.9433          128       153     2012      01        13        013              0.206400       2.370850       1.880502       0.266895   -9999.000000   -9999.000000   -9999.000000   -9999.000000
57731     57731     guizhou        108.2506       27.9433          128       153     2012      01        14        014              0.207000       2.828430       5.326986       0.273105   -9999.000000   -9999.000000   -9999.000000       0.323000
57731     57731     guizhou        108.2506       27.9433          128       153     2012      01        15        015              0.209400       3.958832       2.746305       0.281073       0.066000   -9999.000000       0.037300   -9999.000000
57731     57731     guizhou        108.2506       27.9433          128       153     2012      01        16        016              0.202000       3.163818       0.000000       0.285187       0.067000   -9999.000000       0.036600       0.298000
57731     57731     guizhou        108.2506       27.9433          128       153     2012      01        17        017              0.000000       3.469025       6.679646       0.274474   -9999.000000   -9999.000000       0.035000   -9999.000000
57731     57731     guizhou        108.2506       27.9433          128       153     2012      01        18        018              0.206364       3.167084       2.740845       0.282661   -9999.000000   -9999.000000   -9999.000000       0.306000
57731     57731     guizhou        108.2506       27.9433          128       153     2012      01        19        019              0.208000       3.057617       1.843348       0.285521   -9999.000000   -9999.000000   -9999.000000       0.316000
57731     57731     guizhou        108.2506       27.9433          128       153     2012      01        20        020              0.211000       3.128845       3.751432       0.278164       0.082000   -9999.000000   -9999.000000   -9999.000000
57731     57731     guizhou        108.2506       27.9433          128       153     2012      01        21        021              0.220333       2.329865       0.777725       0.275602   -9999.000000   -9999.000000       0.036300       0.349000
57731     57731     guizhou        108.2506       27.9433          128       153     2012      01        22        022              0.211333       1.870117       0.131956       0.268864   -9999.000000   -9999.000000       0.034100   -9999.000000
57731     57731     guizhou        108.2506       27.9433          128       153     2012      01        23        023              0.206000       1.868561       0.860519       0.251427   -9999.000000   -9999.000000       0.037500       0.297000
57731     57731     guizhou        108.2506       27.9433          128       153     2012      01        24        024              0.205429       1.485657       0.456388       0.242544   -9999.000000   -9999.000000   -9999.000000       0.302000
57731     57731     guizhou        108.2506       27.9433          128       153     2012      01        25        025              0.200824       1.710876       0.253172       0.241324   -9999.000000       0.081100   -9999.000000   -9999.000000
57731     57731     guizhou        108.2506       27.9433          128       153     2012      01        26        026              0.198000       3.826508       0.877234       0.259375       0.084000   -9999.000000       0.037300       0.011000
57731     57731     guizhou        108.2506       27.9433          128       153     2012      01        27        027              0.196167       2.940765       0.309945       0.265505       0.081500       0.052200       0.036400   -9999.000000
57731     57731     guizhou        108.2506       27.9433          128       153     2012      01        28        028              0.195000       3.756195       0.097972       0.267887       0.080500       0.029000       0.032700       0.196000
57731     57731     guizhou        108.2506       27.9433          128       153     2012      01        29        029              0.192000       5.972504       0.068793       0.268601   -9999.000000   -9999.000000       0.033600       0.210000
57731     57731     guizhou        108.2506       27.9433          128       153     2012      01        30        030              0.190250       5.826416       0.000000       0.268310   -9999.000000       0.039800   -9999.000000   -9999.000000
57731     57731     guizhou        108.2506       27.9433          128       153     2012      01        31        031              0.186400       6.359741       0.000000       0.266618       0.077000   -9999.000000   -9999.000000       0.019000
57731     57731     guizhou        108.2506       27.9433          128       153     2012      02        01        032              0.185000       8.289032       1.563127       0.264989       0.075500   -9999.000000       0.039900   -9999.000000
57731     57731     guizhou        108.2506       27.9433          128       153     2012      02        02        033              0.199600       6.050079       0.948158       0.266189       0.076000       0.198500       0.040400       0.139000
57731     57731     guizhou        108.2506       27.9433          128       153     2012      02        03        034              0.206000       4.184235       0.386530       0.268347   -9999.000000   -9999.000000       0.040500   -9999.000000
57731     57731     guizhou        108.2506       27.9433          128       153     2012      02        04        035              0.202000       4.880096       0.396775       0.268385   -9999.000000       0.079200   -9999.000000       0.169000
57731     57731     guizhou        108.2506       27.9433          128       153     2012      02        05        036              0.206571       6.062683       0.272945       0.267870       0.079000   -9999.000000   -9999.000000       0.230000
57731     57731     guizhou        108.2506       27.9433          128       153     2012      02        06        037              0.213300       5.781158       0.180688       0.268578       0.074000   -9999.000000   -9999.000000   -9999.000000
57731     57731     guizhou        108.2506       27.9433          128       153     2012      02        07        038              0.207684       5.869415       0.000000       0.267964       0.074000       0.039900       0.036300       0.159000
57731     57731     guizhou        108.2506       27.9433          128       153     2012      02        08        039              0.200750       6.124603       0.000000       0.264284   -9999.000000   -9999.000000       0.038300   -9999.000000
57731     57731     guizhou        108.2506       27.9433          128       153     2012      02        09        040              0.200333       2.771729       0.093615       0.254724   -9999.000000   -9999.000000       0.033900   -9999.000000
57731     57731     guizhou        108.2506       27.9433          128       153     2012      02        10        041              0.202000       1.669006       0.080981       0.242341   -9999.000000       0.044500   -9999.000000       0.020000
57731     57731     guizhou        108.2506       27.9433          128       153     2012      02        11        042              0.199250       3.115906       0.145965       0.252884       0.079000   -9999.000000   -9999.000000   -9999.000000
57731     57731     guizhou        108.2506       27.9433          128       153     2012      02        12        043              0.199867       3.332397       1.148166       0.258034       0.086000   -9999.000000   -9999.000000       0.237000
57731     57731     guizhou        108.2506       27.9433          128       153     2012      02        13        044              0.209154       3.106995       1.602264       0.262589   -9999.000000   -9999.000000       0.034700   -9999.000000
57731     57731     guizhou        108.2506       27.9433          128       153     2012      02        14        045              0.210000       3.652649       0.062454       0.269354   -9999.000000       0.132100   -9999.000000       0.284000
57731     57731     guizhou        108.2506       27.9433          128       153     2012      02        15        046              0.210000       4.276031       0.000000       0.267553   -9999.000000   -9999.000000       0.032900   -9999.000000
57731     57731     guizhou        108.2506       27.9433          128       153     2012      02        16        047              0.206000       4.266510       0.000000       0.265196       0.079500   -9999.000000   -9999.000000       0.058000
57731     57731     guizhou        108.2506       27.9433          128       153     2012      02        17        048              0.202000       5.037720       0.000000       0.263927       0.079000       0.078600   -9999.000000       0.205000
57731     57731     guizhou        108.2506       27.9433          128       153     2012      02        18        049              0.000000       4.692657       0.000000       0.261879       0.085000   -9999.000000       0.031300   -9999.000000
57731     57731     guizhou        108.2506       27.9433          128       153     2012      02        19        050              0.198000       3.110687       0.000000       0.256179   -9999.000000   -9999.000000       0.034900       0.058000
57731     57731     guizhou        108.2506       27.9433          128       153     2012      02        20        051              0.195000       5.806274       1.452805       0.259384   -9999.000000       0.003300       0.032300   -9999.000000
57731     57731     guizhou        108.2506       27.9433          128       153     2012      02        21        052              0.206000       5.780975       2.798894       0.263580       0.069000   -9999.000000   -9999.000000       0.334000
57731     57731     guizhou        108.2506       27.9433          128       153     2012      02        22        053              0.211600       6.294891       0.987506       0.272009       0.064500   -9999.000000   -9999.000000       0.437000
57731     57731     guizhou        108.2506       27.9433          128       153     2012      02        23        054              0.000000       8.303589       0.526652       0.270107       0.067500   -9999.000000   -9999.000000   -9999.000000
57731     57731     guizhou        108.2506       27.9433          128       153     2012      02        24        055              0.210000       8.027405       0.666507       0.268976       0.065000   -9999.000000       0.037200       0.249000
57731     57731     guizhou        108.2506       27.9433          128       153     2012      02        25        056              0.213800       7.657135       0.095889       0.267214   -9999.000000       0.060600       0.035200   -9999.000000
57731     57731     guizhou        108.2506       27.9433          128       153     2012      02        26        057              0.000000       4.956543       0.000000       0.264973       0.065000   -9999.000000       0.033400       0.095000
57731     57731     guizhou        108.2506       27.9433          128       153     2012      02        27        058              0.206000       3.455688       0.160503       0.259846       0.062000       0.335800   -9999.000000       0.090000
57731     57731     guizhou        108.2506       27.9433          128       153     2012      02        28        059              0.202000       3.245331       0.747019       0.258127       0.068000   -9999.000000   -9999.000000   -9999.000000
57731     57731     guizhou        108.2506       27.9433          128       153     2012      02        29        060              0.000000   -9999.000000       0.256325   -9999.000000       0.064000   -9999.000000   -9999.000000   -9999.000000
57731     57731     guizhou        108.2506       27.9433          128       153     2012      03        01        061              0.206000       3.283142       0.061061       0.259586   -9999.000000       0.166600       0.033600   -9999.000000
57731     57731     guizhou        108.2506       27.9433          128       153     2012      03        02        062              0.202000       5.344208       1.107470       0.263045       0.088000   -9999.000000       0.034900       0.138000
57731     57731     guizhou        108.2506       27.9433          128       153     2012      03        03        063              0.217444       5.382263       6.436047       0.264102       0.091000       0.127300   -9999.000000   -9999.000000
57731     57731     guizhou        108.2506       27.9433          128       153     2012      03        04        064              0.214214       4.676331       0.134380       0.277599       0.091000   -9999.000000   -9999.000000       0.391000
57731     57731     guizhou        108.2506       27.9433          128       153     2012      03        05        065              0.209368       4.453918       0.273312       0.275717       0.077000   -9999.000000   -9999.000000       0.307000
57731     57731     guizhou        108.2506       27.9433          128       153     2012      03        06        066              0.206000       8.335999       2.000262       0.268427   -9999.000000       0.052400       0.036900   -9999.000000
57731     57731     guizhou        108.2506       27.9433          128       153     2012      03        07        067              0.000000       5.826233       1.004638       0.270659   -9999.000000   -9999.000000       0.040500       0.283000
57731     57731     guizhou        108.2506       27.9433          128       153     2012      03        08        068              0.212000       5.231598       1.155519       0.270451       0.087500   -9999.000000       0.037000   -9999.000000
57731     57731     guizhou        108.2506       27.9433          128       153     2012      03        09        069              0.214600       5.299896       0.000000       0.271136       0.085000   -9999.000000   -9999.000000       0.255000
57731     57731     guizhou        108.2506       27.9433          128       153     2012      03        10        070              0.205765       5.949982       0.478065       0.266731       0.081500   -9999.000000   -9999.000000       0.334000
57731     57731     guizhou        108.2506       27.9433          128       153     2012      03        11        071              0.198421       8.416779       0.000000       0.263535   -9999.000000       0.194200       0.035600   -9999.000000
57731     57731     guizhou        108.2506       27.9433          128       153     2012      03        12        072              0.196421       8.499695       0.000000       0.261739   -9999.000000   -9999.000000       0.035600       0.272000
57731     57731     guizhou        108.2506       27.9433          128       153     2012      03        13        073              0.195000      10.034210       0.565331       0.259307       0.076000   -9999.000000       0.036300   -9999.000000
57731     57731     guizhou        108.2506       27.9433          128       153     2012      03        14        074              0.195000      13.005280       1.751527       0.256284       0.081500       0.298200   -9999.000000       0.176000
57731     57731     guizhou        108.2506       27.9433          128       153     2012      03        15        075              0.195500      10.921051       0.612266       0.262155       0.080500   -9999.000000   -9999.000000   -9999.000000
57731     57731     guizhou        108.2506       27.9433          128       153     2012      03        16        076              0.200800      11.928101       0.231716       0.262559       0.076000       0.031300   -9999.000000       0.178000
57731     57731     guizhou        108.2506       27.9433          128       153     2012      03        17        077              0.205684      14.093018       0.066729       0.260712   -9999.000000       0.044300       0.034100       0.345000
57731     57731     guizhou        108.2506       27.9433          128       153     2012      03        18        078              0.212368      15.286255       0.032604       0.258113       0.075000   -9999.000000       0.037000   -9999.000000
57731     57731     guizhou        108.2506       27.9433          128       153     2012      03        19        079              0.207091      15.470001       0.000000       0.257339       0.078000       0.042600       0.044100       0.142000
57731     57731     guizhou        108.2506       27.9433          128       153     2012      03        20        080              0.202000      17.377289       0.000000       0.255249       0.083000   -9999.000000   -9999.000000   -9999.000000
57731     57731     guizhou        108.2506       27.9433          128       153     2012      03        21        081              0.198000      12.631378       2.475680       0.254551       0.092000       0.203000   -9999.000000       0.173000
57731     57731     guizhou        108.2506       27.9433          128       153     2012      03        22        082              0.198000      10.251587       8.855303       0.257849   -9999.000000   -9999.000000   -9999.000000       0.549000
57731     57731     guizhou        108.2506       27.9433          128       153     2012      03        23        083              0.219526       9.732819       0.066972       0.282094       0.086000   -9999.000000       0.046800   -9999.000000
57731     57731     guizhou        108.2506       27.9433          128       153     2012      03        24        084              0.209091      11.695374       0.832797       0.275381       0.078500       0.186200       0.041400       0.234000
57731     57731     guizhou        108.2506       27.9433          128       153     2012      03        25        085              0.000000      16.166870       0.000000       0.262355       0.073000   -9999.000000       0.042600   -9999.000000
57731     57731     guizhou        108.2506       27.9433          128       153     2012      03        26        086              0.198000      17.658142       0.000000       0.255659       0.077000       0.011000   -9999.000000   -9999.000000
57731     57731     guizhou        108.2506       27.9433          128       153     2012      03        27        087              0.195000      15.089447       1.131671       0.255529   -9999.000000       0.107900   -9999.000000       0.375000
57731     57731     guizhou        108.2506       27.9433          128       153     2012      03        28        088              0.233000      17.863403      14.075632       0.255882   -9999.000000   -9999.000000       0.067800   -9999.000000
57731     57731     guizhou        108.2506       27.9433          128       153     2012      03        29        089              0.230812      14.258453      13.207251       0.295059       0.092000       0.136100       0.067500       0.534000
57731     57731     guizhou        108.2506       27.9433          128       153     2012      03        30        090              0.257818      15.034424       4.431289       0.292833       0.087000   -9999.000000       0.064700   -9999.000000
57731     57731     guizhou        108.2506       27.9433          128       153     2012      03        31        091              0.248250      13.905792       0.000000       0.295585       0.079500   -9999.000000       0.062900       0.527000
57731     57731     guizhou        108.2506       27.9433          128       153     2012      04        01        092              0.236261      16.506561       0.000000       0.276084   -9999.000000       0.061600   -9999.000000   -9999.000000
57731     57731     guizhou        108.2506       27.9433          128       153     2012      04        02        093              0.225591      19.630280       0.292645       0.265067   -9999.000000   -9999.000000   -9999.000000       0.360000
57731     57731     guizhou        108.2506       27.9433          128       153     2012      04        03        094              0.223409      23.429749       1.429321       0.257942   -9999.000000       0.131900       0.053700       0.435000
57731     57731     guizhou        108.2506       27.9433          128       153     2012      04        04        095              0.222636      18.127197       0.600092       0.259461       0.088000       0.073600       0.052000   -9999.000000
57731     57731     guizhou        108.2506       27.9433          128       153     2012      04        05        096              0.221000      16.887238       0.751209       0.260136       0.086000   -9999.000000       0.052100       0.358000
57731     57731     guizhou        108.2506       27.9433          128       153     2012      04        06        097              0.217190      17.695404       0.093278       0.258019       0.080000       0.059700   -9999.000000   -9999.000000
57731     57731     guizhou        108.2506       27.9433          128       153     2012      04        07        098              0.213000      17.998260       0.541670       0.255178   -9999.000000   -9999.000000   -9999.000000       0.146000
57731     57731     guizhou        108.2506       27.9433          128       153     2012      04        08        099              0.209286      15.541229       1.997871       0.257941       0.093000       0.161700   -9999.000000       0.212000
57731     57731     guizhou        108.2506       27.9433          128       153     2012      04        09        100              0.244333      17.256653       1.581074       0.259434       0.096000   -9999.000000       0.051500   -9999.000000
57731     57731     guizhou        108.2506       27.9433          128       153     2012      04        10        101              0.237286      15.784454       0.551657       0.264774       0.092000   -9999.000000       0.048900       0.408000
57731     57731     guizhou        108.2506       27.9433          128       153     2012      04        11        102              0.232000      17.700897       0.357528       0.263963       0.098000       0.180100       0.049300   -9999.000000
57731     57731     guizhou        108.2506       27.9433          128       153     2012      04        12        103              0.230150      17.723694       6.665151       0.262883   -9999.000000   -9999.000000   -9999.000000       0.591000
57731     57731     guizhou        108.2506       27.9433          128       153     2012      04        13        104              0.247500      17.482117       2.049658       0.273719   -9999.000000       0.059700   -9999.000000   -9999.000000
57731     57731     guizhou        108.2506       27.9433          128       153     2012      04        14        105              0.241476      15.004761       0.112157       0.279152       0.098000       0.021900       0.052400       0.432000
57731     57731     guizhou        108.2506       27.9433          128       153     2012      04        15        106              0.234143      16.224335       0.228648       0.268116       0.091500   -9999.000000       0.047500       0.384000
57731     57731     guizhou        108.2506       27.9433          128       153     2012      04        16        107              0.224136      18.603729       1.417448       0.262734       0.084000       0.035500       0.067900   -9999.000000
57731     57731     guizhou        108.2506       27.9433          128       153     2012      04        17        108              0.212455      19.800293       0.000000       0.256852   -9999.000000   -9999.000000       0.063900       0.151000
57731     57731     guizhou        108.2506       27.9433          128       153     2012      04        18        109              0.191722      17.134430       0.000000       0.258951   -9999.000000       0.073100   -9999.000000   -9999.000000
57731     57731     guizhou        108.2506       27.9433          128       153     2012      04        19        110              0.175579      20.239685       3.512858       0.252109       0.084000   -9999.000000   -9999.000000       0.322000
57731     57731     guizhou        108.2506       27.9433          128       153     2012      04        20        111              0.237364      21.102661       0.332259       0.256972       0.092500   -9999.000000       0.064800       0.829000
57731     57731     guizhou        108.2506       27.9433          128       153     2012      04        21        112              0.216409      20.105347       0.000000       0.261187       0.107000       0.014700       0.063700   -9999.000000
57731     57731     guizhou        108.2506       27.9433          128       153     2012      04        22        113              0.180190      22.373444       0.000000       0.248425       0.092000       0.073400   -9999.000000       0.312000
57731     57731     guizhou        108.2506       27.9433          128       153     2012      04        23        114              0.150143      24.830780       0.000000       0.240185   -9999.000000   -9999.000000   -9999.000000   -9999.000000
57731     57731     guizhou        108.2506       27.9433          128       153     2012      04        24        115              0.129714      25.163910       2.864844       0.239770   -9999.000000       0.054700   -9999.000000       0.321000
57731     57731     guizhou        108.2506       27.9433          128       153     2012      04        25        116              0.000000      25.081085       1.723096       0.243918       0.126000   -9999.000000   -9999.000000       0.908000
57731     57731     guizhou        108.2506       27.9433          128       153     2012      04        26        117              0.242000      18.334137       5.194921       0.257465       0.111000       0.215000       0.084100       0.271000
57731     57731     guizhou        108.2506       27.9433          128       153     2012      04        27        118              0.220450      22.171326       4.110938       0.243225       0.099000       0.162200       0.076600       0.283000
57731     57731     guizhou        108.2506       27.9433          128       153     2012      04        28        119              0.260056      24.761444      11.937744       0.245359   -9999.000000   -9999.000000       0.089900   -9999.000000
57731     57731     guizhou        108.2506       27.9433          128       153     2012      04        29        120              0.246550      22.257690      18.188816       0.286815   -9999.000000       0.205700   -9999.000000       0.733000
57731     57731     guizhou        108.2506       27.9433          128       153     2012      04        30        121              0.251750      21.920593       4.155860       0.288226       0.126000   -9999.000000   -9999.000000   -9999.000000
57731     57731     guizhou        108.2506       27.9433          128       153     2012      05        01        122              0.257889      22.247559       2.537264       0.295610       0.163000       0.056700       0.065000       0.656000
57731     57731     guizhou        108.2506       27.9433          128       153     2012      05        02        123              0.253176      20.401184      13.357919       0.284376       0.145000       0.104100       0.068400       0.690000
57731     57731     guizhou        108.2506       27.9433          128       153     2012      05        03        124              0.284842      20.318481       1.048822       0.287702   -9999.000000   -9999.000000       0.062600   -9999.000000
57731     57731     guizhou        108.2506       27.9433          128       153     2012      05        04        125              0.272250      19.730560       0.000000       0.290128   -9999.000000       0.291600       0.062500       0.659000
57731     57731     guizhou        108.2506       27.9433          128       153     2012      05        05        126              0.260773      20.959320       1.008661       0.275475       0.139000   -9999.000000   -9999.000000   -9999.000000
57731     57731     guizhou        108.2506       27.9433          128       153     2012      05        06        127              0.253200      23.670105       0.000000       0.267205       0.137500       0.097500   -9999.000000       0.628000
57731     57731     guizhou        108.2506       27.9433          128       153     2012      05        07        128              0.000000      25.166718       0.359508       0.262643   -9999.000000   -9999.000000       0.063900       0.550000
57731     57731     guizhou        108.2506       27.9433          128       153     2012      05        08        129              0.000000      27.355225      15.967760       0.255402   -9999.000000   -9999.000000       0.056600   -9999.000000
57731     57731     guizhou        108.2506       27.9433          128       153     2012      05        09        130              0.000000      27.774780      10.106679       0.277298   -9999.000000       0.282200       0.074700       0.731000
57731     57731     guizhou        108.2506       27.9433          128       153     2012      05        10        131              0.455000      23.987640       0.000000       0.300243       0.138000   -9999.000000   -9999.000000   -9999.000000
57731     57731     guizhou        108.2506       27.9433          128       153     2012      05        11        132              0.000000      24.508270      49.253376       0.276735       0.139000       0.161800   -9999.000000       0.567000
57731     57731     guizhou        108.2506       27.9433          128       153     2012      05        12        133              0.000000      23.993958       7.967549       0.299636       0.152500       0.259700   -9999.000000   -9999.000000
57731     57731     guizhou        108.2506       27.9433          128       153     2012      05        13        134              0.000000      23.093933      13.665212       0.316270       0.160000   -9999.000000       0.075700       0.805000
57731     57731     guizhou        108.2506       27.9433          128       153     2012      05        14        135              0.000000      20.622437       5.997218       0.303796   -9999.000000       0.191900       0.091200       0.857000
57731     57731     guizhou        108.2506       27.9433          128       153     2012      05        15        136              0.000000      19.939850       0.201425       0.305384       0.138000   -9999.000000       0.085300   -9999.000000
57731     57731     guizhou        108.2506       27.9433          128       153     2012      05        16        137              0.000000      20.788818       0.000000       0.289215       0.128500   -9999.000000   -9999.000000       0.464000
57731     57731     guizhou        108.2506       27.9433          128       153     2012      05        17        138              0.000000      22.315857       3.264497       0.282088       0.131500       0.110700   -9999.000000   -9999.000000
57731     57731     guizhou        108.2506       27.9433          128       153     2012      05        18        139              0.000000      23.627563       5.407738       0.281125       0.127000   -9999.000000       0.082700       0.433000
57731     57731     guizhou        108.2506       27.9433          128       153     2012      05        19        140              0.000000      22.457001       0.000000       0.293928   -9999.000000       0.193200       0.079600       0.700000
57731     57731     guizhou        108.2506       27.9433          128       153     2012      05        20        141              0.191786      25.741058       0.000000       0.278842   -9999.000000       0.243900       0.078100   -9999.000000
57731     57731     guizhou        108.2506       27.9433          128       153     2012      05        21        142              0.321706      25.744690      20.765568       0.272118       0.193000   -9999.000000       0.064500       0.946000
57731     57731     guizhou        108.2506       27.9433          128       153     2012      05        22        143              0.443471      21.252167      14.792441       0.306956       0.191000       0.200100   -9999.000000   -9999.000000
57731     57731     guizhou        108.2506       27.9433          128       153     2012      05        23        144              0.438278      20.413177       1.990734       0.311468   -9999.000000   -9999.000000   -9999.000000       0.958000
57731     57731     guizhou        108.2506       27.9433          128       153     2012      05        24        145              0.450750      19.945343       8.801083       0.293018   -9999.000000       0.311100       0.063900       0.810000
57731     57731     guizhou        108.2506       27.9433          128       153     2012      05        25        146              0.000000      19.721344       2.045277       0.302328   -9999.000000       0.337400       0.059400   -9999.000000
57731     57731     guizhou        108.2506       27.9433          128       153     2012      05        26        147              0.436857      19.677887       0.000000       0.294185       0.163500   -9999.000000       0.059500       0.469000
57731     57731     guizhou        108.2506       27.9433          128       153     2012      05        27        148              0.424857      22.450439       0.000000       0.285957       0.163000       0.341000   -9999.000000   -9999.000000
57731     57731     guizhou        108.2506       27.9433          128       153     2012      05        28        149              0.414105      24.007568       0.171491       0.281474       0.170000   -9999.000000   -9999.000000       0.495000
57731     57731     guizhou        108.2506       27.9433          128       153     2012      05        29        150              0.439842      23.602783      18.254097       0.279626   -9999.000000       0.206700   -9999.000000   -9999.000000
57731     57731     guizhou        108.2506       27.9433          128       153     2012      05        30        151              0.429091      22.394745       0.000000       0.310033   -9999.000000   -9999.000000       0.056400   -9999.000000
57731     57731     guizhou        108.2506       27.9433          128       153     2012      05        31        152              0.418389      24.942871      11.728995       0.281858       0.173000   -9999.000000       0.064500   -9999.000000
57731     57731     guizhou        108.2506       27.9433          128       153     2012      06        01        153              0.447455      20.802216       9.253068       0.295664       0.173500       0.152600       0.062100   -9999.000000
57731     57731     guizhou        108.2506       27.9433          128       153     2012      06        02        154              0.439550      19.845978      12.160470       0.305429       0.161000   -9999.000000   -9999.000000       0.534000
57731     57731     guizhou        108.2506       27.9433          128       153     2012      06        03        155              0.454118      22.959045      25.627193       0.297502       0.216000   -9999.000000   -9999.000000   -9999.000000
57731     57731     guizhou        108.2506       27.9433          128       153     2012      06        04        156              0.454700      20.209900       4.028877       0.324625   -9999.000000       0.202700       0.052100       0.709000
57731     57731     guizhou        108.2506       27.9433          128       153     2012      06        05        157              0.447250      21.067139       0.151886       0.307381       0.183000   -9999.000000       0.057200       0.610000
57731     57731     guizhou        108.2506       27.9433          128       153     2012      06        06        158              0.439750      21.920898       0.233683       0.298186       0.180000       0.169300       0.056500   -9999.000000
57731     57731     guizhou        108.2506       27.9433          128       153     2012      06        07        159              0.451000      22.480255      23.450754       0.296186       0.175000       0.199600   -9999.000000       0.663000
57731     57731     guizhou        108.2506       27.9433          128       153     2012      06        08        160              0.443400      22.854828       0.409133       0.319756       0.163000   -9999.000000   -9999.000000   -9999.000000
57731     57731     guizhou        108.2506       27.9433          128       153     2012      06        09        161              0.441000      25.149353      13.133750       0.298036   -9999.000000       0.068800   -9999.000000       0.669000
57731     57731     guizhou        108.2506       27.9433          128       153     2012      06        10        162              0.454842      24.661194      12.235935       0.309944       0.173000   -9999.000000       0.050600   -9999.000000
57731     57731     guizhou        108.2506       27.9433          128       153     2012      06        11        163              0.000000      24.457855       0.054582       0.313598       0.128500       0.136200       0.095900       0.599000
57731     57731     guizhou        108.2506       27.9433          128       153     2012      06        12        164              0.441143      24.037384       0.000000       0.297668       0.127500   -9999.000000       0.095200       0.518000
57731     57731     guizhou        108.2506       27.9433          128       153     2012      06        13        165              0.433350      23.852417       0.303453       0.294566       0.112000   -9999.000000   -9999.000000   -9999.000000
57731     57731     guizhou        108.2506       27.9433          128       153     2012      06        14        166              0.425333      25.403381       1.003951       0.290162   -9999.000000       0.194400   -9999.000000       0.483000
57731     57731     guizhou        108.2506       27.9433          128       153     2012      06        15        167              0.419000      24.193848       0.505508       0.286763   -9999.000000   -9999.000000       0.089500   -9999.000000
57731     57731     guizhou        108.2506       27.9433          128       153     2012      06        16        168              0.412727      25.896332       0.000000       0.279218       0.110000       0.171200       0.086300       0.395000
57731     57731     guizhou        108.2506       27.9433          128       153     2012      06        17        169              0.406350      25.820526       1.340178       0.273142       0.109500       0.190600       0.090900       0.529000
57731     57731     guizhou        108.2506       27.9433          128       153     2012      06        18        170              0.450000      26.172028       0.280165       0.274376       0.117000   -9999.000000       0.110100   -9999.000000
57731     57731     guizhou        108.2506       27.9433          128       153     2012      06        19        171              0.449632      25.210358       0.000000       0.273140   -9999.000000       0.216800   -9999.000000       0.312000
57731     57731     guizhou        108.2506       27.9433          128       153     2012      06        20        172              0.410500      26.907684       0.000000       0.269084   -9999.000000       0.081300   -9999.000000   -9999.000000
57731     57731     guizhou        108.2506       27.9433          128       153     2012      06        21        173              0.419105      27.877136       1.460277       0.265961       0.152000   -9999.000000       0.117100       0.651000
57731     57731     guizhou        108.2506       27.9433          128       153     2012      06        22        174              0.431476      24.999115       5.719660       0.271160       0.167000       0.166800       0.117500       0.478000
57731     57731     guizhou        108.2506       27.9433          128       153     2012      06        23        175              0.451043      24.093536       0.463899       0.283456       0.154000   -9999.000000       0.116800       0.383000
57731     57731     guizhou        108.2506       27.9433          128       153     2012      06        24        176              0.440474      26.828491       1.494375       0.272700       0.143000       0.184200   -9999.000000       0.307000
57731     57731     guizhou        108.2506       27.9433          128       153     2012      06        25        177              0.440100      27.508545      23.070150       0.269608   -9999.000000       0.253300   -9999.000000   -9999.000000
57731     57731     guizhou        108.2506       27.9433          128       153     2012      06        26        178              0.489476      26.068207       6.038105       0.300243       0.186000   -9999.000000   -9999.000000       1.000000
57731     57731     guizhou        108.2506       27.9433          128       153     2012      06        27        179              0.476400      25.666931      10.442966       0.299499       0.167500       0.106700       0.102600   -9999.000000
57731     57731     guizhou        108.2506       27.9433          128       153     2012      06        28        180              0.469400      26.992310       2.559519       0.299510       0.157500   -9999.000000       0.108900       0.710000
57731     57731     guizhou        108.2506       27.9433          128       153     2012      06        29        181              0.458348      27.350861       0.000000       0.291221       0.140000       0.322800       0.103300       0.693000
57731     57731     guizhou        108.2506       27.9433          128       153     2012      06        30        182              0.428300      29.020020       7.382419       0.276507   -9999.000000       0.343100   -9999.000000   -9999.000000
57731     57731     guizhou        108.2506       27.9433          128       153     2012      07        01        183              0.288043      30.165558       0.983267       0.278217   -9999.000000   -9999.000000   -9999.000000       0.635000
57731     57731     guizhou        108.2506       27.9433          128       153     2012      07        02        184              0.282455      28.677979       0.000000       0.281180       0.177000       0.220300       0.075400   -9999.000000
57731     57731     guizhou        108.2506       27.9433          128       153     2012      07        03        185              0.342227      27.620392       0.000000       0.271318       0.171000   -9999.000000       0.073400       0.410000
57731     57731     guizhou        108.2506       27.9433          128       153     2012      07        04        186              0.304476      28.376648       0.000000       0.266240       0.170500       0.024900       0.070400       0.459000
57731     57731     guizhou        108.2506       27.9433          128       153     2012      07        05        187              0.275714      28.609650       0.623226       0.262552   -9999.000000       0.284400       0.069500   -9999.000000
57731     57731     guizhou        108.2506       27.9433          128       153     2012      07        06        188              0.125714      28.416138       0.000000       0.264092   -9999.000000   -9999.000000   -9999.000000       0.425000
57731     57731     guizhou        108.2506       27.9433          128       153     2012      07        07        189              0.059400      29.521027       0.000000       0.257460   -9999.000000       0.073300   -9999.000000   -9999.000000
57731     57731     guizhou        108.2506       27.9433          128       153     2012      07        08        190              0.000000      29.362274       0.000000       0.254087       0.166500       0.094500       0.069600       0.456000
57731     57731     guizhou        108.2506       27.9433          128       153     2012      07        09        191              0.000000      29.265991       0.000000       0.250132       0.167500   -9999.000000       0.091700   -9999.000000
57731     57731     guizhou        108.2506       27.9433          128       153     2012      07        10        192              0.000000      29.039490       0.000000       0.248432       0.155000       0.029300       0.089400       0.388000
57731     57731     guizhou        108.2506       27.9433          128       153     2012      07        11        193              0.000000      30.242218      12.155987       0.244826   -9999.000000   -9999.000000   -9999.000000       0.534000
57731     57731     guizhou        108.2506       27.9433          128       153     2012      07        12        194              0.000000      30.051422      27.272846       0.263238   -9999.000000       0.272600   -9999.000000   -9999.000000
57731     57731     guizhou        108.2506       27.9433          128       153     2012      07        13        195              0.000000      27.506989       1.660553       0.316915       0.206500       0.211200   -9999.000000       0.771000
57731     57731     guizhou        108.2506       27.9433          128       153     2012      07        14        196              0.000000      27.206024       1.027218       0.291117       0.194500   -9999.000000       0.088500   -9999.000000
57731     57731     guizhou        108.2506       27.9433          128       153     2012      07        15        197              0.558056      28.924347      23.823275       0.272378       0.216000       0.162700       0.091100       0.783000
57731     57731     guizhou        108.2506       27.9433          128       153     2012      07        16        198              0.570000      26.339233      54.479572       0.297326   -9999.000000   -9999.000000       0.104500       1.000000
57731     57731     guizhou        108.2506       27.9433          128       153     2012      07        17        199              0.586762      25.807892      21.327604       0.338336   -9999.000000       0.253600   -9999.000000   -9999.000000
57731     57731     guizhou        108.2506       27.9433          128       153     2012      07        18        200              0.585636      25.503632      14.053889       0.323191       0.226000       0.269000   -9999.000000       0.720000
57731     57731     guizhou        108.2506       27.9433          128       153     2012      07        19        201              0.579136      26.075745       0.732235       0.320732       0.204500   -9999.000000       0.098300   -9999.000000
57731     57731     guizhou        108.2506       27.9433          128       153     2012      07        20        202              0.567818      27.637726       0.000000       0.302985       0.192000       0.387300       0.095900       0.657000
57731     57731     guizhou        108.2506       27.9433          128       153     2012      07        21        203              0.553524      29.298889       0.000000       0.292715   -9999.000000   -9999.000000       0.094200       0.656000
57731     57731     guizhou        108.2506       27.9433          128       153     2012      07        22        204              0.518200      29.565674       6.584180       0.287650   -9999.000000       0.230900       0.091000       0.433000
57731     57731     guizhou        108.2506       27.9433          128       153     2012      07        23        205              0.000000      30.184204      52.100349       0.288304   -9999.000000       0.313000   -9999.000000       0.919000
57731     57731     guizhou        108.2506       27.9433          128       153     2012      07        24        206              0.000000      28.475067       5.340178       0.328701       0.267000   -9999.000000   -9999.000000   -9999.000000
57731     57731     guizhou        108.2506       27.9433          128       153     2012      07        25        207              0.000000      28.147614       4.155219       0.315095       0.280500       0.280800       0.131900       0.685000
57731     57731     guizhou        108.2506       27.9433          128       153     2012      07        26        208              0.425158      28.198822       4.028172       0.306982   -9999.000000       0.133300       0.131600   -9999.000000
57731     57731     guizhou        108.2506       27.9433          128       153     2012      07        27        209              0.430526      28.166443       3.076960       0.301650   -9999.000000       0.148500       0.106500       0.718000
57731     57731     guizhou        108.2506       27.9433          128       153     2012      07        28        210              0.439409      28.193359       6.030268       0.296909       0.265000       0.285300   -9999.000000       0.496000
57731     57731     guizhou        108.2506       27.9433          128       153     2012      07        29        211              0.434818      28.344269       0.249734       0.298750       0.249500   -9999.000000   -9999.000000   -9999.000000
57731     57731     guizhou        108.2506       27.9433          128       153     2012      07        30        212              0.415591      28.646057       2.744541       0.288970       0.252000       0.239700   -9999.000000       0.522000
57731     57731     guizhou        108.2506       27.9433          128       153     2012      07        31        213              0.373773      29.623932       5.499834       0.280406       0.251500       0.215500       0.123600   -9999.000000
57731     57731     guizhou        108.2506       27.9433          128       153     2012      08        01        214              0.332762      30.112732       5.252209       0.278833   -9999.000000   -9999.000000       0.131900       0.591000
57731     57731     guizhou        108.2506       27.9433          128       153     2012      08        02        215              0.296600      28.649628       0.469033       0.292662   -9999.000000       0.095000       0.123800       0.629000
57731     57731     guizhou        108.2506       27.9433          128       153     2012      08        03        216              0.262136      29.203552       0.000000       0.276453       0.220000   -9999.000000   -9999.000000   -9999.000000
57731     57731     guizhou        108.2506       27.9433          128       153     2012      08        04        217              0.246955      29.062469      10.546041       0.269732       0.231000       0.037600   -9999.000000       0.473000
57731     57731     guizhou        108.2506       27.9433          128       153     2012      08        05        218              0.385450      29.607941       8.166055       0.279592       0.266000       0.278400       0.129400   -9999.000000
57731     57731     guizhou        108.2506       27.9433          128       153     2012      08        06        219              0.395143      27.800476       3.452703       0.297664       0.261000   -9999.000000       0.122700       0.509000
57731     57731     guizhou        108.2506       27.9433          128       153     2012      08        07        220              0.407476      26.182251       0.403002       0.285021   -9999.000000       0.225700       0.117900   -9999.000000
57731     57731     guizhou        108.2506       27.9433          128       153     2012      08        08        221              0.381950      28.780243       6.719859       0.279173       0.232000   -9999.000000   -9999.000000       0.475000
57731     57731     guizhou        108.2506       27.9433          128       153     2012      08        09        222              0.330273      29.562927       0.161788       0.269785       0.226500       0.091400   -9999.000000       0.545000
57731     57731     guizhou        108.2506       27.9433          128       153     2012      08        10        223              0.283955      30.363556       0.000000       0.264972       0.230000       0.049100   -9999.000000   -9999.000000
57731     57731     guizhou        108.2506       27.9433          128       153     2012      08        11        224              0.252905      29.960541       0.000000       0.262574       0.184000   -9999.000000       0.120800       0.332000
57731     57731     guizhou        108.2506       27.9433          128       153     2012      08        12        225              0.236400      30.598694       0.000000       0.258289   -9999.000000       0.205000       0.121400   -9999.000000
57731     57731     guizhou        108.2506       27.9433          128       153     2012      08        13        226              0.232684      31.006165       6.865021       0.255181   -9999.000000       0.036600       0.112900       0.582000
57731     57731     guizhou        108.2506       27.9433          128       153     2012      08        14        227              0.234700      28.890411       0.212298       0.277187       0.227500   -9999.000000   -9999.000000       0.568000
57731     57731     guizhou        108.2506       27.9433          128       153     2012      08        15        228              0.229579      29.863586       0.466957       0.265500       0.210000       0.353500   -9999.000000   -9999.000000
57731     57731     guizhou        108.2506       27.9433          128       153     2012      08        16        229              0.000000      30.080688       0.000000       0.260565       0.214000   -9999.000000       0.111700       0.331000
57731     57731     guizhou        108.2506       27.9433          128       153     2012      08        17        230              0.216267      30.616730       1.313509       0.254534       0.198000       0.170300       0.108400   -9999.000000
57731     57731     guizhou        108.2506       27.9433          128       153     2012      08        18        231              0.211636      29.952881       0.000000       0.250642   -9999.000000       0.147200       0.111200       0.362000
57731     57731     guizhou        108.2506       27.9433          128       153     2012      08        19        232              0.207350      30.371277       0.041189       0.244443       0.220000   -9999.000000       0.103000       0.424000
57731     57731     guizhou        108.2506       27.9433          128       153     2012      08        20        233              0.215600      29.940094      21.972960       0.240983       0.200000       0.140800   -9999.000000       0.825000
57731     57731     guizhou        108.2506       27.9433          128       153     2012      08        21        234              0.289318      29.912872      17.296827       0.278846       0.231500   -9999.000000   -9999.000000       0.661000
57731     57731     guizhou        108.2506       27.9433          128       153     2012      08        22        235              0.371571      27.231140       0.000000       0.302169       0.213000       0.159300       0.089300   -9999.000000
57731     57731     guizhou        108.2506       27.9433          128       153     2012      08        23        236              0.338545      24.881134       0.000000       0.282453   -9999.000000       0.176900       0.092500       0.378000
57731     57731     guizhou        108.2506       27.9433          128       153     2012      08        24        237              0.298636      25.222809       0.000000       0.266888   -9999.000000   -9999.000000       0.092100   -9999.000000
57731     57731     guizhou        108.2506       27.9433          128       153     2012      08        25        238              0.000000      26.271240       0.000000       0.259633       0.213500       0.267600   -9999.000000       0.305000
57731     57731     guizhou        108.2506       27.9433          128       153     2012      08        26        239              0.000000      26.355011       0.501612       0.256503       0.219000   -9999.000000   -9999.000000       0.374000
57731     57731     guizhou        108.2506       27.9433          128       153     2012      08        27        240              0.000000      26.952209       0.000000       0.253155       0.208000       0.185100   -9999.000000   -9999.000000
57731     57731     guizhou        108.2506       27.9433          128       153     2012      08        28        241              0.000000      27.933014       2.254424       0.247849   -9999.000000       0.245600       0.107900       0.443000
57731     57731     guizhou        108.2506       27.9433          128       153     2012      08        29        242              0.000000      28.261475       3.012844       0.245446   -9999.000000   -9999.000000       0.109400   -9999.000000
57731     57731     guizhou        108.2506       27.9433          128       153     2012      08        30        243              0.000000      26.335938       6.546650       0.257569       0.214000       0.201100       0.111400       0.617000
57731     57731     guizhou        108.2506       27.9433          128       153     2012      08        31        244              0.229200      26.775024       0.655623       0.277327       0.205500       0.131400   -9999.000000       0.512000
57731     57731     guizhou        108.2506       27.9433          128       153     2012      09        01        245              0.227750      28.235718       2.914766       0.261099       0.173000       0.149200   -9999.000000   -9999.000000
57731     57731     guizhou        108.2506       27.9433          128       153     2012      09        02        246              0.365048      28.941681       0.355895       0.256724       0.163000       0.075100       0.118600       0.333000
57731     57731     guizhou        108.2506       27.9433          128       153     2012      09        03        247              0.367368      26.654480       0.074093       0.256211   -9999.000000   -9999.000000       0.078300   -9999.000000
57731     57731     guizhou        108.2506       27.9433          128       153     2012      09        04        248              0.360190      24.971802       0.000000       0.250550       0.180000       0.089400       0.079900       0.220000
57731     57731     guizhou        108.2506       27.9433          128       153     2012      09        05        249              0.346364      25.897980       0.000000       0.243329       0.180500       0.316600       0.079200   -9999.000000
57731     57731     guizhou        108.2506       27.9433          128       153     2012      09        06        250              0.330524      25.007599       0.000000       0.241629       0.180500   -9999.000000   -9999.000000       0.272000
57731     57731     guizhou        108.2506       27.9433          128       153     2012      09        07        251              0.282955      27.386169       0.000000       0.237015       0.176000       0.114500   -9999.000000       0.339000
57731     57731     guizhou        108.2506       27.9433          128       153     2012      09        08        252              0.247190      28.166534       0.000000       0.233351   -9999.000000   -9999.000000       0.077000   -9999.000000
57731     57731     guizhou        108.2506       27.9433          128       153     2012      09        09        253              0.231333      28.548676       0.478002       0.230685   -9999.000000       0.188600       0.085300       0.202000
57731     57731     guizhou        108.2506       27.9433          128       153     2012      09        10        254              0.215333      28.342133       0.000000       0.230409       0.198500       0.232800       0.100800   -9999.000000
57731     57731     guizhou        108.2506       27.9433          128       153     2012      09        11        255              0.203900      26.747101      16.007042       0.231008       0.140000   -9999.000000   -9999.000000       0.728000
57731     57731     guizhou        108.2506       27.9433          128       153     2012      09        12        256              0.202647      27.448578       8.067322       0.263790       0.157500       0.212600   -9999.000000       0.962000
57731     57731     guizhou        108.2506       27.9433          128       153     2012      09        13        257              0.226238      22.896088       0.465953       0.287171       0.139000   -9999.000000   -9999.000000   -9999.000000
57731     57731     guizhou        108.2506       27.9433          128       153     2012      09        14        258              0.219333      22.004547       0.000000       0.272153   -9999.000000       0.261200       0.099100       0.231000
57731     57731     guizhou        108.2506       27.9433          128       153     2012      09        15        259              0.204905      23.189423       2.113014       0.257682       0.140000       0.390600       0.089500   -9999.000000
57731     57731     guizhou        108.2506       27.9433          128       153     2012      09        16        260              0.216211      23.349884       2.092828       0.251954       0.157000   -9999.000000       0.107000       0.387000
57731     57731     guizhou        108.2506       27.9433          128       153     2012      09        17        261              0.216091      19.656769       0.000000       0.265512       0.145500       0.240800   -9999.000000       0.402000
57731     57731     guizhou        108.2506       27.9433          128       153     2012      09        18        262              0.209600      21.788513       0.227351       0.253183       0.138000       0.094800   -9999.000000       0.223000
57731     57731     guizhou        108.2506       27.9433          128       153     2012      09        19        263              0.200350      21.873627       0.000000       0.250664   -9999.000000       0.145900       0.109000       0.044000
57731     57731     guizhou        108.2506       27.9433          128       153     2012      09        20        264              0.210235      24.221771       9.018453       0.244698   -9999.000000       0.306800       0.119200   -9999.000000
57731     57731     guizhou        108.2506       27.9433          128       153     2012      09        21        265              0.259619      21.629456       6.976283       0.271504   -9999.000000   -9999.000000       0.109900       0.904000
57731     57731     guizhou        108.2506       27.9433          128       153     2012      09        22        266              0.283059      20.923218       3.617082       0.286333       0.170000       0.153800       0.111800   -9999.000000
57731     57731     guizhou        108.2506       27.9433          128       153     2012      09        23        267              0.319375      22.023865       6.708593       0.274877       0.171500   -9999.000000   -9999.000000       0.770000
57731     57731     guizhou        108.2506       27.9433          128       153     2012      09        24        268              0.318937      20.628876       5.005476       0.288646   -9999.000000   -9999.000000   -9999.000000       0.686000
57731     57731     guizhou        108.2506       27.9433          128       153     2012      09        25        269              0.315353      21.473907       1.424752       0.283552   -9999.000000       0.108400       0.092700   -9999.000000
57731     57731     guizhou        108.2506       27.9433          128       153     2012      09        26        270              0.316875      21.891144       1.991022       0.276322       0.173000   -9999.000000       0.088800       0.756000
57731     57731     guizhou        108.2506       27.9433          128       153     2012      09        27        271              0.319786      21.916473       0.000000       0.277445       0.156000       0.249100       0.087400   -9999.000000
57731     57731     guizhou        108.2506       27.9433          128       153     2012      09        28        272              0.313000      22.768402       0.000000       0.266870       0.153000   -9999.000000   -9999.000000       0.455000
57731     57731     guizhou        108.2506       27.9433          128       153     2012      09        29        273              0.306000      23.303711       0.000000       0.260009       0.136000   -9999.000000   -9999.000000       0.505000
57731     57731     guizhou        108.2506       27.9433          128       153     2012      09        30        274              0.294600      23.256531       0.098261       0.253797   -9999.000000       0.144300   -9999.000000   -9999.000000
57731     57731     guizhou        108.2506       27.9433          128       153     2012      10        01        275              0.279455      22.112152       0.000000       0.249856       0.090000   -9999.000000       0.089300       0.466000
57731     57731     guizhou        108.2506       27.9433          128       153     2012      10        02        276              0.268000      23.308533       2.050891       0.245279       0.090500       0.147900       0.097200   -9999.000000
57731     57731     guizhou        108.2506       27.9433          128       153     2012      10        03        277              0.262000      22.242340       2.196340       0.250537       0.095000       0.322500       0.094800       0.522000
57731     57731     guizhou        108.2506       27.9433          128       153     2012      10        04        278              0.326545      19.091675      12.212375       0.261917       0.109500   -9999.000000   -9999.000000   -9999.000000
57731     57731     guizhou        108.2506       27.9433          128       153     2012      10        05        279              0.331882      18.203033       4.372672       0.291074   -9999.000000       0.235200   -9999.000000       0.669000
57731     57731     guizhou        108.2506       27.9433          128       153     2012      10        06        280              0.324000      18.141510       0.434108       0.284632   -9999.000000       0.344200       0.102700       0.428000
57731     57731     guizhou        108.2506       27.9433          128       153     2012      10        07        281              0.320000      18.815948       0.348452       0.271625       0.108500       0.153000       0.106200   -9999.000000
57731     57731     guizhou        108.2506       27.9433          128       153     2012      10        08        282              0.320000      17.526825       3.272097       0.269248       0.105000   -9999.000000       0.066500       0.669000
57731     57731     guizhou        108.2506       27.9433          128       153     2012      10        09        283              0.327542      17.696198       0.478984       0.274994       0.097000   -9999.000000       0.061000   -9999.000000
57731     57731     guizhou        108.2506       27.9433          128       153     2012      10        10        284              0.326250      19.209534       0.000000       0.268669       0.099000       0.238600   -9999.000000       0.587000
57731     57731     guizhou        108.2506       27.9433          128       153     2012      10        11        285              0.325125      19.757172       0.129292       0.264160   -9999.000000   -9999.000000   -9999.000000       0.605000
57731     57731     guizhou        108.2506       27.9433          128       153     2012      10        12        286              0.331083      17.860199       7.130754       0.262076       0.148000   -9999.000000       0.064600   -9999.000000
57731     57731     guizhou        108.2506       27.9433          128       153     2012      10        13        287              0.341167      17.157776       3.981635       0.271503       0.135500       0.286500       0.065500       0.585000
57731     57731     guizhou        108.2506       27.9433          128       153     2012      10        14        288              0.340958      17.597046       2.057911       0.282086       0.146000   -9999.000000       0.065600   -9999.000000
57731     57731     guizhou        108.2506       27.9433          128       153     2012      10        15        289              0.337000      17.593964       3.142162       0.281188       0.142000       0.342900   -9999.000000       0.834000
57731     57731     guizhou        108.2506       27.9433          128       153     2012      10        16        290              0.347583      17.438385       1.014722       0.275916   -9999.000000       0.327200   -9999.000000       0.863000
57731     57731     guizhou        108.2506       27.9433          128       153     2012      10        17        291              0.339625      19.968384       0.000000       0.276161   -9999.000000   -9999.000000       0.107800   -9999.000000
57731     57731     guizhou        108.2506       27.9433          128       153     2012      10        18        292              0.331167      19.146454       0.000000       0.264755       0.123000       0.175100       0.106800       0.256000
57731     57731     guizhou        108.2506       27.9433          128       153     2012      10        19        293              0.333417      19.620789       6.138584       0.259454       0.127000   -9999.000000       0.116500   -9999.000000
57731     57731     guizhou        108.2506       27.9433          128       153     2012      10        20        294              0.346792      19.278870       0.134282       0.266880       0.122500       0.286200       0.111100       0.548000
57731     57731     guizhou        108.2506       27.9433          128       153     2012      10        21        295              0.347958      19.201813      16.280787       0.274534   -9999.000000       0.205300   -9999.000000   -9999.000000
57731     57731     guizhou        108.2506       27.9433          128       153     2012      10        22        296              0.366750      22.842987       2.883449       0.287141   -9999.000000   -9999.000000   -9999.000000       0.573000
57731     57731     guizhou        108.2506       27.9433          128       153     2012      10        23        297              0.356375      18.673065       1.139703       0.290451   -9999.000000       0.473600       0.058700       0.543000
57731     57731     guizhou        108.2506       27.9433          128       153     2012      10        24        298              0.359583      17.841125       2.397562       0.275278   -9999.000000       0.330800       0.060000   -9999.000000
57731     57731     guizhou        108.2506       27.9433          128       153     2012      10        25        299              0.000000      16.652863       0.078094       0.275540       0.164500       0.276600       0.056900       0.586000
57731     57731     guizhou        108.2506       27.9433          128       153     2012      10        26        300              0.351375      16.540466       0.181099       0.274840       0.163000       0.289700   -9999.000000   -9999.000000
57731     57731     guizhou        108.2506       27.9433          128       153     2012      10        27        301              0.346333      17.099518       0.000000       0.270366   -9999.000000   -9999.000000   -9999.000000       0.533000
57731     57731     guizhou        108.2506       27.9433          128       153     2012      10        28        302              0.000000      18.760742       0.190980       0.267541       0.163000       0.179700   -9999.000000       0.595000
57731     57731     guizhou        108.2506       27.9433          128       153     2012      10        29        303              0.352625      20.922150       0.850274       0.264558       0.163500       0.200000       0.089800   -9999.000000
57731     57731     guizhou        108.2506       27.9433          128       153     2012      10        30        304              0.350875      19.501221       0.000000       0.266895       0.154500   -9999.000000       0.091200       0.344000
57731     57731     guizhou        108.2506       27.9433          128       153     2012      10        31        305              0.345583      16.572906       0.762549       0.263987       0.150500       0.223200       0.089500   -9999.000000
57731     57731     guizhou        108.2506       27.9433          128       153     2012      11        01        306              0.339917      17.051117       1.491659       0.260499   -9999.000000   -9999.000000   -9999.000000       0.325000
57731     57731     guizhou        108.2506       27.9433          128       153     2012      11        02        307              0.337625      17.305145       5.966041       0.261698   -9999.000000       0.267800   -9999.000000   -9999.000000
57731     57731     guizhou        108.2506       27.9433          128       153     2012      11        03        308              0.355333      19.117676       1.652317       0.267750       0.118500       0.293600       0.091300       0.540000
57731     57731     guizhou        108.2506       27.9433          128       153     2012      11        04        309              0.346250      18.062256       0.889373       0.278509       0.120000   -9999.000000       0.097200       0.565000
57731     57731     guizhou        108.2506       27.9433          128       153     2012      11        05        310              0.356833      15.129730       1.089585       0.271519       0.128500       0.233400       0.073800   -9999.000000
57731     57731     guizhou        108.2506       27.9433          128       153     2012      11        06        311              0.370625      14.738739      17.632032       0.272056       0.132000   -9999.000000       0.076500       0.524000
57731     57731     guizhou        108.2506       27.9433          128       153     2012      11        07        312              0.389375      14.601715       2.989850       0.287690   -9999.000000       0.159800   -9999.000000   -9999.000000
57731     57731     guizhou        108.2506       27.9433          128       153     2012      11        08        313              0.373000      13.258636       1.314270       0.295483       0.145000       0.250700   -9999.000000       0.628000
57731     57731     guizhou        108.2506       27.9433          128       153     2012      11        09        314              0.383292      13.491577       0.432537       0.282592       0.145500   -9999.000000       0.070400       0.568000
57731     57731     guizhou        108.2506       27.9433          128       153     2012      11        10        315              0.402250      11.936920       0.000000       0.277325       0.125500       0.252800       0.072200   -9999.000000
57731     57731     guizhou        108.2506       27.9433          128       153     2012      11        11        316              0.378042      14.035156       0.658588       0.272770       0.105000       0.227300       0.072500       0.163000
57731     57731     guizhou        108.2506       27.9433          128       153     2012      11        12        317              0.368125      14.475037       0.000000       0.269079   -9999.000000       0.209800   -9999.000000   -9999.000000
57731     57731     guizhou        108.2506       27.9433          128       153     2012      11        13        318              0.000000      12.953278       0.000000       0.268054   -9999.000000       0.242900   -9999.000000       0.410000
57731     57731     guizhou        108.2506       27.9433          128       153     2012      11        14        319              0.362000      14.058472       3.796052       0.267031       0.113000   -9999.000000   -9999.000000       0.329000
57731     57731     guizhou        108.2506       27.9433          128       153     2012      11        15        320              0.365625      14.510345      11.920177       0.273738       0.118500       0.162000       0.106700       0.478000
57731     57731     guizhou        108.2506       27.9433          128       153     2012      11        16        321              0.366250      13.284729       1.465581       0.289197       0.108000       0.243800       0.098100       0.422000
57731     57731     guizhou        108.2506       27.9433          128       153     2012      11        17        322              0.000000      12.087830       0.000000       0.290067   -9999.000000   -9999.000000       0.098300   -9999.000000
57731     57731     guizhou        108.2506       27.9433          128       153     2012      11        18        323              0.359000      13.463593       0.000000       0.276131   -9999.000000       0.129600   -9999.000000       0.396000
57731     57731     guizhou        108.2506       27.9433          128       153     2012      11        19        324              0.359000      13.610535       0.000000       0.271797       0.117000   -9999.000000   -9999.000000   -9999.000000
57731     57731     guizhou        108.2506       27.9433          128       153     2012      11        20        325              0.355333      12.695618       0.322940       0.270606       0.120000       0.432400       0.059400       0.369000
57731     57731     guizhou        108.2506       27.9433          128       153     2012      11        21        326              0.361542      11.208679       0.917585       0.270873       0.097000       0.231000       0.062200       0.410000
57731     57731     guizhou        108.2506       27.9433          128       153     2012      11        22        327              0.366333      12.157227       0.782998       0.271724       0.094000   -9999.000000       0.062200   -9999.000000
57731     57731     guizhou        108.2506       27.9433          128       153     2012      11        23        328              0.362500      11.293701       0.000000       0.271254   -9999.000000       0.352700       0.060200       0.282000
57731     57731     guizhou        108.2506       27.9433          128       153     2012      11        24        329              0.359000      10.082458       3.233559       0.269462       0.107000   -9999.000000   -9999.000000   -9999.000000
57731     57731     guizhou        108.2506       27.9433          128       153     2012      11        25        330              0.357333       8.074738       1.788645       0.274897       0.098500       0.235300   -9999.000000       0.385000
57731     57731     guizhou        108.2506       27.9433          128       153     2012      11        26        331              0.360750       8.849915       1.680389       0.276350       0.092000       0.182500   -9999.000000       0.627000
57731     57731     guizhou        108.2506       27.9433          128       153     2012      11        27        332              0.359000       8.270752       0.188748       0.279388       0.095000   -9999.000000       0.053200   -9999.000000
57731     57731     guizhou        108.2506       27.9433          128       153     2012      11        28        333              0.357500       8.125580       0.000000       0.272973   -9999.000000       0.341200       0.051600       0.412000
57731     57731     guizhou        108.2506       27.9433          128       153     2012      11        29        334              0.357000       9.533661       0.507980       0.270599   -9999.000000   -9999.000000   -9999.000000   -9999.000000
57731     57731     guizhou        108.2506       27.9433          128       153     2012      11        30        335              0.358167       7.971893       1.511730       0.270642       0.101500       0.333300   -9999.000000       0.457000
57731     57731     guizhou        108.2506       27.9433          128       153     2012      12        01        336              0.359000       7.533661       0.000000       0.272396       0.098500       0.300300   -9999.000000   -9999.000000
57731     57731     guizhou        108.2506       27.9433          128       153     2012      12        02        337              0.357833       8.738190       0.000000       0.271173       0.098000   -9999.000000       0.052000       0.269000
57731     57731     guizhou        108.2506       27.9433          128       153     2012      12        03        338              0.355000       8.906342       0.000000       0.268734       0.098000       0.181000       0.065700       0.292000
57731     57731     guizhou        108.2506       27.9433          128       153     2012      12        04        339              0.353875      10.079681       1.226723       0.265955   -9999.000000       0.168100       0.064300   -9999.000000
57731     57731     guizhou        108.2506       27.9433          128       153     2012      12        05        340              0.350750       7.542480       0.000000       0.267743       0.096000   -9999.000000   -9999.000000       0.135000
57731     57731     guizhou        108.2506       27.9433          128       153     2012      12        06        341              0.347833       9.628143       0.000000       0.264551       0.096000       0.421200   -9999.000000   -9999.000000
57731     57731     guizhou        108.2506       27.9433          128       153     2012      12        07        342              0.347000       7.991943       0.000000       0.264276       0.100000   -9999.000000       0.061400       0.232000
57731     57731     guizhou        108.2506       27.9433          128       153     2012      12        08        343              0.351625       7.815002       3.091950       0.264639       0.101000       0.454300       0.069800       0.305000
57731     57731     guizhou        108.2506       27.9433          128       153     2012      12        09        344              0.377333       9.228638      15.997654       0.268906   -9999.000000       0.191600       0.066200   -9999.000000
57731     57731     guizhou        108.2506       27.9433          128       153     2012      12        10        345              0.367875       7.085846       3.634665       0.299137   -9999.000000   -9999.000000   -9999.000000       0.216000
57731     57731     guizhou        108.2506       27.9433          128       153     2012      12        11        346              0.362375       6.033264       0.182619       0.294887       0.103500       0.227700   -9999.000000   -9999.000000
57731     57731     guizhou        108.2506       27.9433          128       153     2012      12        12        347              0.363625       6.780975       4.849276       0.279871       0.113000   -9999.000000   -9999.000000       0.456000
57731     57731     guizhou        108.2506       27.9433          128       153     2012      12        13        348              0.361500       6.126129       0.000000       0.284205       0.096500       0.225600       0.043700       0.502000
57731     57731     guizhou        108.2506       27.9433          128       153     2012      12        14        349              0.359000       6.503601       0.000000       0.280630   -9999.000000       0.330200       0.044200       0.247000
57731     57731     guizhou        108.2506       27.9433          128       153     2012      12        15        350              0.000000       8.374786       0.103058       0.275622   -9999.000000   -9999.000000       0.043400       0.295000
57731     57731     guizhou        108.2506       27.9433          128       153     2012      12        16        351              0.359000       8.745605       0.506018       0.273713       0.103000       0.313800   -9999.000000   -9999.000000
57731     57731     guizhou        108.2506       27.9433          128       153     2012      12        17        352              0.359000       8.601959       0.305926       0.272488       0.104500   -9999.000000   -9999.000000       0.267000
57731     57731     guizhou        108.2506       27.9433          128       153     2012      12        18        353              0.359000       6.441681       0.109995       0.272294       0.106000       0.170600       0.049000   -9999.000000
57731     57731     guizhou        108.2506       27.9433          128       153     2012      12        19        354              0.355833       5.689453       0.729373       0.270832       0.114000       0.205800       0.047200       0.293000
57731     57731     guizhou        108.2506       27.9433          128       153     2012      12        20        355              0.000000       4.087921       1.604892       0.271909   -9999.000000   -9999.000000       0.045700       0.271000
57731     57731     guizhou        108.2506       27.9433          128       153     2012      12        21        356              0.358667       3.597198       0.128961       0.274673   -9999.000000       0.256100       0.042300   -9999.000000
57731     57731     guizhou        108.2506       27.9433          128       153     2012      12        22        357              0.355000       4.184448       0.000000       0.273121       0.092000       0.128700   -9999.000000       0.271000
57731     57731     guizhou        108.2506       27.9433          128       153     2012      12        23        358              0.355000       4.351807       0.000000       0.270317       0.093000   -9999.000000   -9999.000000   -9999.000000
57731     57731     guizhou        108.2506       27.9433          128       153     2012      12        24        359              0.355000       4.857880       0.254749       0.265795       0.086000       0.260200       0.052400       0.175000
57731     57731     guizhou        108.2506       27.9433          128       153     2012      12        25        360              0.357833       6.457611       1.653359       0.265982   -9999.000000   -9999.000000       0.055900       0.140000
57731     57731     guizhou        108.2506       27.9433          128       153     2012      12        26        361              0.000000       4.003662       0.202327       0.270739   -9999.000000   -9999.000000       0.055400   -9999.000000
57731     57731     guizhou        108.2506       27.9433          128       153     2012      12        27        362              0.370286       2.725342       0.317485       0.269132       0.097000   -9999.000000   -9999.000000       0.270000
57731     57731     guizhou        108.2506       27.9433          128       153     2012      12        28        363              0.000000       3.987183       4.168854       0.269076       0.099000   -9999.000000   -9999.000000   -9999.000000
57731     57731     guizhou        108.2506       27.9433          128       153     2012      12        29        364              0.000000       3.135162       3.616120       0.277147   -9999.000000   -9999.000000   -9999.000000       0.331000
57731     57731     guizhou        108.2506       27.9433          128       153     2012      12        30        365              0.000000       3.209717       0.461058       0.281765       0.090000   -9999.000000       0.048400   -9999.000000
57731     57731     guizhou        108.2506       27.9433          128       153     2012      12        31        366              0.362600       4.391754       0.218900       0.268001   -9999.000000       0.234800       0.046500   -9999.000000
