# Supplementary material for: Research on Fusing Multisatellite Soil Moisture Data Based on Bayesian Model Averaging
Source: Hindawi journal article supplement (doi:10.1155/2018/9310838), 2018-06-25
Supplement: f1 [file 9310838.f1.zip › 2012_sm00-10cm_daily_ZDB_ZHY_57749_366days_allin.txt]

57749     57749     hunan          109.9700       27.4597          130       160     2012      01        01        001              0.000000   -9999.000000       0.718574   -9999.000000       0.107000   -9999.000000       0.060600   -9999.000000
57749     57749     hunan          109.9700       27.4597          130       160     2012      01        02        002              0.306958       5.519257      11.510441       0.288026       0.125000       0.158700   -9999.000000       0.374000
57749     57749     hunan          109.9700       27.4597          130       160     2012      01        03        003              0.000000       4.760803       6.839421       0.301416   -9999.000000   -9999.000000   -9999.000000   -9999.000000
57749     57749     hunan          109.9700       27.4597          130       160     2012      01        04        004              0.331625       2.613190       1.968670       0.305277   -9999.000000   -9999.000000       0.050200       0.238000
57749     57749     hunan          109.9700       27.4597          130       160     2012      01        05        005              0.329750       3.178070       0.347562       0.293946   -9999.000000   -9999.000000       0.045900       0.361000
57749     57749     hunan          109.9700       27.4597          130       160     2012      01        06        006              0.327458       2.437195       0.743785       0.288787       0.113500   -9999.000000       0.049800   -9999.000000
57749     57749     hunan          109.9700       27.4597          130       160     2012      01        07        007              0.325292       3.377991       0.122286       0.287979       0.119000       0.096800   -9999.000000       0.062000
57749     57749     hunan          109.9700       27.4597          130       160     2012      01        08        008              0.000000       3.428070       0.233931       0.286074   -9999.000000   -9999.000000   -9999.000000   -9999.000000
57749     57749     hunan          109.9700       27.4597          130       160     2012      01        09        009              0.322125       4.369080       2.837589       0.284626   -9999.000000       0.057400   -9999.000000       0.214000
57749     57749     hunan          109.9700       27.4597          130       160     2012      01        10        010              0.320708       4.191956       0.261230       0.283810       0.122000       0.327800       0.041500       0.230000
57749     57749     hunan          109.9700       27.4597          130       160     2012      01        11        011              0.320167       4.714233       0.045693       0.283256       0.089000   -9999.000000       0.045200       0.051000
57749     57749     hunan          109.9700       27.4597          130       160     2012      01        12        012              0.319708       4.213043       4.362234       0.283071       0.097000       0.116900       0.045100       0.222000
57749     57749     hunan          109.9700       27.4597          130       160     2012      01        13        013              0.322000       3.604248       3.000848       0.288842       0.093000       0.100600   -9999.000000   -9999.000000
57749     57749     hunan          109.9700       27.4597          130       160     2012      01        14        014              0.353458       3.624817      20.549656       0.292059   -9999.000000       0.189800   -9999.000000       0.543000
57749     57749     hunan          109.9700       27.4597          130       160     2012      01        15        015              0.345625       3.302673       1.305844       0.310048   -9999.000000   -9999.000000       0.042500   -9999.000000
57749     57749     hunan          109.9700       27.4597          130       160     2012      01        16        016              0.332458       2.219788       0.099500       0.305120   -9999.000000   -9999.000000       0.046000       0.353000
57749     57749     hunan          109.9700       27.4597          130       160     2012      01        17        017              0.000000       3.282440      13.520637       0.290551       0.110000       0.102300       0.047500       0.282000
57749     57749     hunan          109.9700       27.4597          130       160     2012      01        18        018              0.346375       3.444550       2.828033       0.304770   -9999.000000   -9999.000000       0.046000   -9999.000000
57749     57749     hunan          109.9700       27.4597          130       160     2012      01        19        019              0.340458       3.158569       2.110421       0.300642   -9999.000000   -9999.000000   -9999.000000       0.447000
57749     57749     hunan          109.9700       27.4597          130       160     2012      01        20        020              0.340833       3.341705       5.230064       0.295741       0.110000       0.143200   -9999.000000   -9999.000000
57749     57749     hunan          109.9700       27.4597          130       160     2012      01        21        021              0.343542       2.919617       2.512180       0.297490   -9999.000000   -9999.000000       0.044300       0.407000
57749     57749     hunan          109.9700       27.4597          130       160     2012      01        22        022              0.338708       1.824768       1.514255       0.293090   -9999.000000   -9999.000000       0.038400       0.173000
57749     57749     hunan          109.9700       27.4597          130       160     2012      01        23        023              0.331208       1.531464       0.223710       0.275899   -9999.000000   -9999.000000       0.059200   -9999.000000
57749     57749     hunan          109.9700       27.4597          130       160     2012      01        24        024              0.335583       1.197174       0.921535       0.262916   -9999.000000   -9999.000000   -9999.000000       0.223000
57749     57749     hunan          109.9700       27.4597          130       160     2012      01        25        025              0.330292       1.490295       0.595827       0.262529   -9999.000000       0.119400   -9999.000000   -9999.000000
57749     57749     hunan          109.9700       27.4597          130       160     2012      01        26        026              0.327833       3.259827       0.000000       0.276688       0.109000   -9999.000000   -9999.000000       0.304000
57749     57749     hunan          109.9700       27.4597          130       160     2012      01        27        027              0.326125       2.458893       0.000000       0.282742       0.107500       0.122100       0.059000   -9999.000000
57749     57749     hunan          109.9700       27.4597          130       160     2012      01        28        028              0.325792       3.810333       0.088746       0.283591       0.095000       0.161000       0.050300       0.077000
57749     57749     hunan          109.9700       27.4597          130       160     2012      01        29        029              0.324917       4.386902       6.332359       0.282920   -9999.000000   -9999.000000       0.053100       0.249000
57749     57749     hunan          109.9700       27.4597          130       160     2012      01        30        030              0.324458       5.082306       0.000000       0.282346   -9999.000000       0.022200   -9999.000000   -9999.000000
57749     57749     hunan          109.9700       27.4597          130       160     2012      01        31        031              0.322833       4.298401       0.158724       0.281331       0.101000       0.071500   -9999.000000       0.150000
57749     57749     hunan          109.9700       27.4597          130       160     2012      02        01        032              0.322417       7.185852       0.443444       0.280062       0.104000   -9999.000000       0.061400   -9999.000000
57749     57749     hunan          109.9700       27.4597          130       160     2012      02        02        033              0.322042       5.499268       0.173084       0.281208       0.091000       0.089400       0.059000       0.038000
57749     57749     hunan          109.9700       27.4597          130       160     2012      02        03        034              0.321750       2.881653       4.594283       0.279692   -9999.000000   -9999.000000       0.061400       0.258000
57749     57749     hunan          109.9700       27.4597          130       160     2012      02        04        035              0.324625       4.997498       0.600904       0.288040   -9999.000000       0.259700       0.062800   -9999.000000
57749     57749     hunan          109.9700       27.4597          130       160     2012      02        05        036              0.340083       4.851013       2.688363       0.285174       0.124000       0.055000   -9999.000000       0.223000
57749     57749     hunan          109.9700       27.4597          130       160     2012      02        06        037              0.343625       4.339172       0.325620       0.287464       0.105000   -9999.000000   -9999.000000   -9999.000000
57749     57749     hunan          109.9700       27.4597          130       160     2012      02        07        038              0.334250       4.452728       0.000000       0.284407   -9999.000000       0.265600       0.050100       0.309000
57749     57749     hunan          109.9700       27.4597          130       160     2012      02        08        039              0.329083       6.193024       0.000000       0.279225   -9999.000000   -9999.000000       0.048900       0.184000
57749     57749     hunan          109.9700       27.4597          130       160     2012      02        09        040              0.326875       2.803619       1.033401       0.276153   -9999.000000       0.162100       0.051600       0.132000
57749     57749     hunan          109.9700       27.4597          130       160     2012      02        10        041              0.326417       2.249878       0.202145       0.272092   -9999.000000   -9999.000000   -9999.000000       0.090000
57749     57749     hunan          109.9700       27.4597          130       160     2012      02        11        042              0.326083       3.662109       1.148876       0.276663       0.125000   -9999.000000   -9999.000000   -9999.000000
57749     57749     hunan          109.9700       27.4597          130       160     2012      02        12        043              0.343458       3.888824       5.544150       0.278179       0.131000       0.106500   -9999.000000       0.597000
57749     57749     hunan          109.9700       27.4597          130       160     2012      02        13        044              0.353292       3.725464       3.844960       0.289624       0.131000   -9999.000000       0.076200   -9999.000000
57749     57749     hunan          109.9700       27.4597          130       160     2012      02        14        045              0.346375       4.124939       1.003801       0.291587   -9999.000000       0.086100       0.073100       0.384000
57749     57749     hunan          109.9700       27.4597          130       160     2012      02        15        046              0.341417       3.713654       0.150831       0.286257   -9999.000000   -9999.000000       0.071900       0.472000
57749     57749     hunan          109.9700       27.4597          130       160     2012      02        16        047              0.334708       3.724091       0.186144       0.281576       0.114000   -9999.000000   -9999.000000   -9999.000000
57749     57749     hunan          109.9700       27.4597          130       160     2012      02        17        048              0.331250       5.101105       0.000000       0.278379       0.111000       0.100800   -9999.000000       0.404000
57749     57749     hunan          109.9700       27.4597          130       160     2012      02        18        049              0.328708       5.526886       0.000000       0.276669       0.113000   -9999.000000       0.064200   -9999.000000
57749     57749     hunan          109.9700       27.4597          130       160     2012      02        19        050              0.325708       3.872589       1.116661       0.275328       0.099000       0.080600       0.074000       0.264000
57749     57749     hunan          109.9700       27.4597          130       160     2012      02        20        051              0.329958       7.973022       5.058788       0.273161   -9999.000000       0.148400       0.049700       0.271000
57749     57749     hunan          109.9700       27.4597          130       160     2012      02        21        052              0.357000       6.289215      11.087460       0.283686       0.103000   -9999.000000   -9999.000000   -9999.000000
57749     57749     hunan          109.9700       27.4597          130       160     2012      02        22        053              0.353833       6.601593      10.032831       0.300798       0.092500       0.252800   -9999.000000       0.595000
57749     57749     hunan          109.9700       27.4597          130       160     2012      02        23        054              0.351042       7.929413       2.175279       0.299606       0.092500       0.180800   -9999.000000   -9999.000000
57749     57749     hunan          109.9700       27.4597          130       160     2012      02        24        055              0.340500       7.473663       1.353528       0.297765       0.094000   -9999.000000       0.055300       0.576000
57749     57749     hunan          109.9700       27.4597          130       160     2012      02        25        056              0.339250       5.509247       0.079650       0.287990   -9999.000000       0.233500       0.051200   -9999.000000
57749     57749     hunan          109.9700       27.4597          130       160     2012      02        26        057              0.333708       4.417297       0.122563       0.283022   -9999.000000   -9999.000000       0.049100       0.158000
57749     57749     hunan          109.9700       27.4597          130       160     2012      02        27        058              0.330792       3.280060       0.000000       0.279942   -9999.000000   -9999.000000   -9999.000000       0.263000
57749     57749     hunan          109.9700       27.4597          130       160     2012      02        28        059              0.329458       3.735413       1.650658       0.278621       0.093000   -9999.000000   -9999.000000   -9999.000000
57749     57749     hunan          109.9700       27.4597          130       160     2012      02        29        060              0.000000   -9999.000000       0.203873   -9999.000000       0.086000   -9999.000000   -9999.000000   -9999.000000
57749     57749     hunan          109.9700       27.4597          130       160     2012      03        01        061              0.333417       5.123871       2.203846       0.280044   -9999.000000       0.097800       0.045800   -9999.000000
57749     57749     hunan          109.9700       27.4597          130       160     2012      03        02        062              0.336417       6.990387       1.892103       0.282245   -9999.000000   -9999.000000       0.045100       0.189000
57749     57749     hunan          109.9700       27.4597          130       160     2012      03        03        063              0.362667       6.117645      29.670414       0.285633       0.137500       0.129400       0.050600       0.353000
57749     57749     hunan          109.9700       27.4597          130       160     2012      03        04        064              0.361542       5.641541       4.196795       0.315070   -9999.000000       0.192600   -9999.000000   -9999.000000
57749     57749     hunan          109.9700       27.4597          130       160     2012      03        05        065              0.346792       4.956787       0.548665       0.305737       0.119500   -9999.000000   -9999.000000       0.322000
57749     57749     hunan          109.9700       27.4597          130       160     2012      03        06        066              0.352208       6.589386       5.868089       0.289926   -9999.000000       0.291300       0.049400   -9999.000000
57749     57749     hunan          109.9700       27.4597          130       160     2012      03        07        067              0.000000       5.792084       2.027149       0.295668   -9999.000000   -9999.000000       0.051100       0.419000
57749     57749     hunan          109.9700       27.4597          130       160     2012      03        08        068              0.349958       5.928528       4.959961       0.290817       0.143000       0.347400       0.048300       0.578000
57749     57749     hunan          109.9700       27.4597          130       160     2012      03        09        069              0.350333       5.420288       0.069298       0.294988       0.126000       0.317700   -9999.000000       0.320000
57749     57749     hunan          109.9700       27.4597          130       160     2012      03        10        070              0.341000       5.213928       0.000000       0.289955       0.114000   -9999.000000   -9999.000000       0.274000
57749     57749     hunan          109.9700       27.4597          130       160     2012      03        11        071              0.337167       7.883240       0.000000       0.284501       0.081000       0.392700   -9999.000000   -9999.000000
57749     57749     hunan          109.9700       27.4597          130       160     2012      03        12        072              0.335583      10.117035       0.579163       0.281464   -9999.000000       0.143000       0.041500       0.456000
57749     57749     hunan          109.9700       27.4597          130       160     2012      03        13        073              0.334125      10.365601       0.068602       0.281091       0.089000   -9999.000000       0.038300   -9999.000000
57749     57749     hunan          109.9700       27.4597          130       160     2012      03        14        074              0.337792      11.884003       7.763614       0.279448       0.097500       0.326900   -9999.000000       0.479000
57749     57749     hunan          109.9700       27.4597          130       160     2012      03        15        075              0.354250      10.206268       1.628431       0.291196       0.093000   -9999.000000   -9999.000000       0.564000
57749     57749     hunan          109.9700       27.4597          130       160     2012      03        16        076              0.354750      10.817078       0.591609       0.291928       0.089000   -9999.000000   -9999.000000   -9999.000000
57749     57749     hunan          109.9700       27.4597          130       160     2012      03        17        077              0.345708      10.529480       0.753315       0.287216   -9999.000000       0.104000   -9999.000000       0.486000
57749     57749     hunan          109.9700       27.4597          130       160     2012      03        18        078              0.359292      11.868347       9.475361       0.282328       0.092000   -9999.000000       0.045900   -9999.000000
57749     57749     hunan          109.9700       27.4597          130       160     2012      03        19        079              0.358750      12.363800      11.720416       0.300880       0.093500       0.078200       0.052400       0.696000
57749     57749     hunan          109.9700       27.4597          130       160     2012      03        20        080              0.353083      11.930664       0.290475       0.301957       0.096500   -9999.000000       0.054900       0.602000
57749     57749     hunan          109.9700       27.4597          130       160     2012      03        21        081              0.344167       8.779663       0.315007       0.291809       0.107000       0.163700   -9999.000000   -9999.000000
57749     57749     hunan          109.9700       27.4597          130       160     2012      03        22        082              0.374000       8.387360      32.824768       0.285465   -9999.000000   -9999.000000   -9999.000000       0.846000
57749     57749     hunan          109.9700       27.4597          130       160     2012      03        23        083              0.356208       8.025146       0.196592       0.317983   -9999.000000   -9999.000000       0.049500   -9999.000000
57749     57749     hunan          109.9700       27.4597          130       160     2012      03        24        084              0.343333      11.494598       0.000000       0.301667       0.087000       0.211000       0.047400       0.516000
57749     57749     hunan          109.9700       27.4597          130       160     2012      03        25        085              0.000000      14.892334       0.000000       0.290140       0.081500   -9999.000000       0.048100   -9999.000000
57749     57749     hunan          109.9700       27.4597          130       160     2012      03        26        086              0.335750      16.566193       0.000000       0.285173       0.079500       0.184900   -9999.000000   -9999.000000
57749     57749     hunan          109.9700       27.4597          130       160     2012      03        27        087              0.332125      16.971924       0.000000       0.281755   -9999.000000       0.290500   -9999.000000       0.536000
57749     57749     hunan          109.9700       27.4597          130       160     2012      03        28        088              0.375625      18.492645      32.801407       0.279127   -9999.000000   -9999.000000   -9999.000000   -9999.000000
57749     57749     hunan          109.9700       27.4597          130       160     2012      03        29        089              0.385917      15.113892      26.510996       0.322705   -9999.000000       0.330800       0.076500       0.873000
57749     57749     hunan          109.9700       27.4597          130       160     2012      03        30        090              0.372167      15.208252       5.401581       0.318076       0.094500       0.287700       0.074000   -9999.000000
57749     57749     hunan          109.9700       27.4597          130       160     2012      03        31        091              0.348625      14.559174       0.000000       0.315851       0.075500   -9999.000000       0.069400       0.381000
57749     57749     hunan          109.9700       27.4597          130       160     2012      04        01        092              0.339833      17.302338       0.000000       0.300346       0.091000       0.380300   -9999.000000       0.679000
57749     57749     hunan          109.9700       27.4597          130       160     2012      04        02        093              0.328750      19.299072       0.085084       0.294669   -9999.000000   -9999.000000   -9999.000000   -9999.000000
57749     57749     hunan          109.9700       27.4597          130       160     2012      04        03        094              0.326667      21.370941       0.000000       0.289709       0.109000       0.114400       0.056600       0.273000
57749     57749     hunan          109.9700       27.4597          130       160     2012      04        04        095              0.334542      18.848175       0.067341       0.283737       0.108000       0.126300       0.060700   -9999.000000
57749     57749     hunan          109.9700       27.4597          130       160     2012      04        05        096              0.330167      15.156281       0.682131       0.282600       0.095000   -9999.000000       0.052100       0.319000
57749     57749     hunan          109.9700       27.4597          130       160     2012      04        06        097              0.329458      17.208740       0.524706       0.281347       0.096000       0.115300       0.057000       0.520000
57749     57749     hunan          109.9700       27.4597          130       160     2012      04        07        098              0.327667      15.636841       0.118423       0.283082   -9999.000000   -9999.000000   -9999.000000       0.326000
57749     57749     hunan          109.9700       27.4597          130       160     2012      04        08        099              0.326333      15.786743       2.191002       0.281131   -9999.000000       0.188900   -9999.000000       0.223000
57749     57749     hunan          109.9700       27.4597          130       160     2012      04        09        100              0.329375      16.916656       5.492525       0.282493       0.112500       0.249000       0.052100   -9999.000000
57749     57749     hunan          109.9700       27.4597          130       160     2012      04        10        101              0.328000      15.993896       7.294643       0.293446       0.106000   -9999.000000       0.010000       0.478000
57749     57749     hunan          109.9700       27.4597          130       160     2012      04        11        102              0.370792      19.129761      44.927303       0.294713       0.134000       0.390200       0.053900   -9999.000000
57749     57749     hunan          109.9700       27.4597          130       160     2012      04        12        103              0.352750      17.502563       3.223961       0.339205   -9999.000000   -9999.000000   -9999.000000       0.656000
57749     57749     hunan          109.9700       27.4597          130       160     2012      04        13        104              0.350167      16.654846       4.330296       0.303650   -9999.000000       0.127500   -9999.000000       0.781000
57749     57749     hunan          109.9700       27.4597          130       160     2012      04        14        105              0.347792      16.989746       2.063606       0.298528       0.136500       0.361400   -9999.000000   -9999.000000
57749     57749     hunan          109.9700       27.4597          130       160     2012      04        15        106              0.351833      15.852844       2.903251       0.297727       0.121000   -9999.000000       0.052700       0.510000
57749     57749     hunan          109.9700       27.4597          130       160     2012      04        16        107              0.345333      15.824249       4.725118       0.295930       0.101000       0.303000       0.081100   -9999.000000
57749     57749     hunan          109.9700       27.4597          130       160     2012      04        17        108              0.352292      18.636566       0.360354       0.293731       0.118000       0.263100       0.088900       0.396000
57749     57749     hunan          109.9700       27.4597          130       160     2012      04        18        109              0.355458      16.901886       0.000000       0.293608   -9999.000000       0.127400   -9999.000000       0.562000
57749     57749     hunan          109.9700       27.4597          130       160     2012      04        19        110              0.349333      19.060181      12.587632       0.286147       0.117000       0.205300   -9999.000000   -9999.000000
57749     57749     hunan          109.9700       27.4597          130       160     2012      04        20        111              0.360542      21.214142       1.475387       0.289759       0.118500   -9999.000000       0.082500       0.621000
57749     57749     hunan          109.9700       27.4597          130       160     2012      04        21        112              0.343250      18.884674       0.000000       0.300198       0.137500       0.220800       0.082100   -9999.000000
57749     57749     hunan          109.9700       27.4597          130       160     2012      04        22        113              0.335583      21.392151       0.336865       0.283329       0.131000       0.079300       0.086200       0.597000
57749     57749     hunan          109.9700       27.4597          130       160     2012      04        23        114              0.329292      23.184448       1.111172       0.276856   -9999.000000   -9999.000000       0.107900   -9999.000000
57749     57749     hunan          109.9700       27.4597          130       160     2012      04        24        115              0.321292      23.958191       6.810987       0.276839       0.188000       0.246700   -9999.000000       0.645000
57749     57749     hunan          109.9700       27.4597          130       160     2012      04        25        116              0.000000      24.889374       4.061865       0.284674       0.171500   -9999.000000   -9999.000000       0.566000
57749     57749     hunan          109.9700       27.4597          130       160     2012      04        26        117              0.347667      18.032013       0.673437       0.292610       0.151000       0.228600       0.107600   -9999.000000
57749     57749     hunan          109.9700       27.4597          130       160     2012      04        27        118              0.338167      21.364990       7.296924       0.278690       0.133000       0.368800       0.104900       0.558000
57749     57749     hunan          109.9700       27.4597          130       160     2012      04        28        119              0.342792      24.097443       3.641943       0.280411   -9999.000000   -9999.000000       0.120900   -9999.000000
57749     57749     hunan          109.9700       27.4597          130       160     2012      04        29        120              0.343792      21.144409      26.745703       0.295747   -9999.000000       0.324500   -9999.000000       0.754000
57749     57749     hunan          109.9700       27.4597          130       160     2012      04        30        121              0.371250      21.576508       4.456836       0.296590       0.196000   -9999.000000   -9999.000000       1.000000
57749     57749     hunan          109.9700       27.4597          130       160     2012      05        01        122              0.370125      20.712158       6.468877       0.311050       0.274000   -9999.000000   -9999.000000   -9999.000000
57749     57749     hunan          109.9700       27.4597          130       160     2012      05        02        123              0.369958      19.652527      11.394228       0.304789       0.252500       0.268700       0.095500       0.853000
57749     57749     hunan          109.9700       27.4597          130       160     2012      05        03        124              0.368167      20.381500       1.712294       0.303857   -9999.000000   -9999.000000       0.094800   -9999.000000
57749     57749     hunan          109.9700       27.4597          130       160     2012      05        04        125              0.358500      20.093903       0.645051       0.299978   -9999.000000       0.246100       0.092400       0.773000
57749     57749     hunan          109.9700       27.4597          130       160     2012      05        05        126              0.347042      20.588440       1.153171       0.291526       0.233000   -9999.000000   -9999.000000       0.795000
57749     57749     hunan          109.9700       27.4597          130       160     2012      05        06        127              0.340292      24.161682       0.000000       0.285065       0.220000       0.278300   -9999.000000       0.535000
57749     57749     hunan          109.9700       27.4597          130       160     2012      05        07        128              0.332083      26.260681       0.000000       0.280580   -9999.000000       0.270900       0.074700       0.528000
57749     57749     hunan          109.9700       27.4597          130       160     2012      05        08        129              0.320417      27.241638       8.158377       0.275576       0.175000   -9999.000000       0.061300   -9999.000000
57749     57749     hunan          109.9700       27.4597          130       160     2012      05        09        130              0.374708      27.530426      70.389732       0.283240   -9999.000000       0.237400       0.092100       1.000000
57749     57749     hunan          109.9700       27.4597          130       160     2012      05        10        131              0.357208      23.244080       0.000000       0.383626       0.246000   -9999.000000       0.083400   -9999.000000
57749     57749     hunan          109.9700       27.4597          130       160     2012      05        11        132              0.350625      24.701385       1.447644       0.321440       0.230000   -9999.000000   -9999.000000       0.660000
57749     57749     hunan          109.9700       27.4597          130       160     2012      05        12        133              0.368917      24.908478      23.958313       0.304706       0.243500       0.242800   -9999.000000       1.000000
57749     57749     hunan          109.9700       27.4597          130       160     2012      05        13        134              0.357833      22.512909      19.078373       0.324937       0.224000   -9999.000000       0.074200   -9999.000000
57749     57749     hunan          109.9700       27.4597          130       160     2012      05        14        135              0.365583      21.090363       2.836785       0.314111   -9999.000000       0.458900       0.127100       0.824000
57749     57749     hunan          109.9700       27.4597          130       160     2012      05        15        136              0.351792      18.754333       0.038164       0.314919       0.221000   -9999.000000       0.123700   -9999.000000
57749     57749     hunan          109.9700       27.4597          130       160     2012      05        16        137              0.351375      20.897125       0.674841       0.301861       0.201000   -9999.000000   -9999.000000       0.400000
57749     57749     hunan          109.9700       27.4597          130       160     2012      05        17        138              0.341167      22.448303       0.000000       0.295675       0.199500       0.272000   -9999.000000       0.641000
57749     57749     hunan          109.9700       27.4597          130       160     2012      05        18        139              0.335125      23.339203       0.450371       0.291166       0.206500   -9999.000000   -9999.000000   -9999.000000
57749     57749     hunan          109.9700       27.4597          130       160     2012      05        19        140              0.325500      25.441833       0.000000       0.285194   -9999.000000       0.222600       0.122600       0.475000
57749     57749     hunan          109.9700       27.4597          130       160     2012      05        20        141              0.312125      25.572937       0.000000       0.280718   -9999.000000       0.276600       0.118100   -9999.000000
57749     57749     hunan          109.9700       27.4597          130       160     2012      05        21        142              0.299167      25.850250       9.129339       0.274563       0.358000   -9999.000000       0.072700       0.452000
57749     57749     hunan          109.9700       27.4597          130       160     2012      05        22        143              0.353333      24.419403      29.013821       0.284170       0.444000       0.347400   -9999.000000   -9999.000000
57749     57749     hunan          109.9700       27.4597          130       160     2012      05        23        144              0.374167      21.196899      14.598027       0.324836   -9999.000000       0.268800   -9999.000000       0.947000
57749     57749     hunan          109.9700       27.4597          130       160     2012      05        24        145              0.382792      20.103760      31.619211       0.315935   -9999.000000       0.508400       0.084500       0.938000
57749     57749     hunan          109.9700       27.4597          130       160     2012      05        25        146              0.000000      19.279755      16.762001       0.326096   -9999.000000       0.230100       0.088900   -9999.000000
57749     57749     hunan          109.9700       27.4597          130       160     2012      05        26        147              0.362833      18.898102       2.790741       0.328837       0.380000   -9999.000000       0.083800       0.608000
57749     57749     hunan          109.9700       27.4597          130       160     2012      05        27        148              0.351583      20.790924       0.000000       0.315666       0.326500       0.192100       0.074900   -9999.000000
57749     57749     hunan          109.9700       27.4597          130       160     2012      05        28        149              0.346833      22.876617       2.481528       0.303557       0.303000       0.266900   -9999.000000       0.459000
57749     57749     hunan          109.9700       27.4597          130       160     2012      05        29        150              0.357750      24.330505      18.166658       0.297246   -9999.000000   -9999.000000   -9999.000000       0.555000
57749     57749     hunan          109.9700       27.4597          130       160     2012      05        30        151              0.358500      23.266022       0.000000       0.314130   -9999.000000       0.174600       0.075100   -9999.000000
57749     57749     hunan          109.9700       27.4597          130       160     2012      05        31        152              0.348042      24.042755       2.016423       0.297541       0.374000   -9999.000000       0.078500   -9999.000000
57749     57749     hunan          109.9700       27.4597          130       160     2012      06        01        153              0.370583      21.884003      12.564823       0.297164       0.298000   -9999.000000       0.079900   -9999.000000
57749     57749     hunan          109.9700       27.4597          130       160     2012      06        02        154              0.361917      20.518005       1.063401       0.309913       0.288000   -9999.000000   -9999.000000       0.481000
57749     57749     hunan          109.9700       27.4597          130       160     2012      06        03        155              0.385500      22.854706      19.678389       0.294212   -9999.000000   -9999.000000   -9999.000000       0.930000
57749     57749     hunan          109.9700       27.4597          130       160     2012      06        04        156              0.374208      21.210907       6.399805       0.317305   -9999.000000       0.196300   -9999.000000       0.824000
57749     57749     hunan          109.9700       27.4597          130       160     2012      06        05        157              0.360750      21.196503       3.213347       0.308889   -9999.000000   -9999.000000       0.068200       0.925000
57749     57749     hunan          109.9700       27.4597          130       160     2012      06        06        158              0.366708      22.421783       1.174712       0.301581       0.321500       0.276500       0.065000   -9999.000000
57749     57749     hunan          109.9700       27.4597          130       160     2012      06        07        159              0.368750      23.547089       8.032456       0.297738       0.314000       0.283800       0.064000       0.902000
57749     57749     hunan          109.9700       27.4597          130       160     2012      06        08        160              0.370958      23.764862       5.265937       0.305034       0.284000   -9999.000000   -9999.000000   -9999.000000
57749     57749     hunan          109.9700       27.4597          130       160     2012      06        09        161              0.369750      25.352112      15.677839       0.301820   -9999.000000       0.314800   -9999.000000       0.740000
57749     57749     hunan          109.9700       27.4597          130       160     2012      06        10        162              0.392292      27.936432      15.486971       0.304331   -9999.000000       0.434000       0.063400       1.000000
57749     57749     hunan          109.9700       27.4597          130       160     2012      06        11        163              0.000000      25.880890       0.148845       0.318458       0.245500       0.340600       0.065800   -9999.000000
57749     57749     hunan          109.9700       27.4597          130       160     2012      06        12        164              0.360458      25.858856       0.000000       0.299016       0.206500       0.288600       0.068800       0.830000
57749     57749     hunan          109.9700       27.4597          130       160     2012      06        13        165              0.358000      26.785950       0.000000       0.293487       0.198000   -9999.000000   -9999.000000   -9999.000000
57749     57749     hunan          109.9700       27.4597          130       160     2012      06        14        166              0.351958      27.827240       0.000000       0.288071   -9999.000000       0.464600   -9999.000000       0.632000
57749     57749     hunan          109.9700       27.4597          130       160     2012      06        15        167              0.346583      26.180328       0.000000       0.284554   -9999.000000       0.174500   -9999.000000       0.742000
57749     57749     hunan          109.9700       27.4597          130       160     2012      06        16        168              0.336917      27.120605       0.000000       0.278622       0.208000   -9999.000000       0.059100   -9999.000000
57749     57749     hunan          109.9700       27.4597          130       160     2012      06        17        169              0.322417      26.839020       0.358523       0.274935       0.195500       0.322100       0.057500       0.642000
57749     57749     hunan          109.9700       27.4597          130       160     2012      06        18        170              0.304542      27.245483       0.000000       0.273031       0.168000   -9999.000000       0.104800   -9999.000000
57749     57749     hunan          109.9700       27.4597          130       160     2012      06        19        171              0.286000      27.530609       0.000000       0.271738       0.181000       0.312800   -9999.000000       0.552000
57749     57749     hunan          109.9700       27.4597          130       160     2012      06        20        172              0.266667      27.906860       5.646842       0.269029   -9999.000000       0.428000   -9999.000000   -9999.000000
57749     57749     hunan          109.9700       27.4597          130       160     2012      06        21        173              0.258125      28.293427       0.211134       0.266567   -9999.000000   -9999.000000   -9999.000000       0.629000
57749     57749     hunan          109.9700       27.4597          130       160     2012      06        22        174              0.255292      27.124023       0.730336       0.268242       0.222000       0.211600       0.106200       0.668000
57749     57749     hunan          109.9700       27.4597          130       160     2012      06        23        175              0.251083      27.385620       0.000000       0.267046       0.231000   -9999.000000       0.097400   -9999.000000
57749     57749     hunan          109.9700       27.4597          130       160     2012      06        24        176              0.244333      28.224335       0.000000       0.263316       0.213000       0.165700       0.098600       0.468000
57749     57749     hunan          109.9700       27.4597          130       160     2012      06        25        177              0.312708      29.728668      57.892769       0.258488   -9999.000000       0.199300   -9999.000000   -9999.000000
57749     57749     hunan          109.9700       27.4597          130       160     2012      06        26        178              0.370250      27.840088      40.689720       0.341599   -9999.000000   -9999.000000   -9999.000000       1.000000
57749     57749     hunan          109.9700       27.4597          130       160     2012      06        27        179              0.382333      26.801910      23.010328       0.331641       0.267000       0.096700       0.151000       1.000000
57749     57749     hunan          109.9700       27.4597          130       160     2012      06        28        180              0.366625      27.010651       1.946700       0.327807       0.252500       0.194600       0.141400   -9999.000000
57749     57749     hunan          109.9700       27.4597          130       160     2012      06        29        181              0.355208      28.371033       1.599572       0.308314       0.230000       0.134100       0.140700       0.892000
57749     57749     hunan          109.9700       27.4597          130       160     2012      06        30        182              0.345625      29.889374       3.291927       0.297837   -9999.000000       0.157300   -9999.000000   -9999.000000
57749     57749     hunan          109.9700       27.4597          130       160     2012      07        01        183              0.335500      30.303284       0.000000       0.292021   -9999.000000   -9999.000000   -9999.000000       0.589000
57749     57749     hunan          109.9700       27.4597          130       160     2012      07        02        184              0.318917      29.504425       0.000000       0.285263       0.244500       0.251900   -9999.000000       0.699000
57749     57749     hunan          109.9700       27.4597          130       160     2012      07        03        185              0.292958      29.353333       0.000000       0.278274       0.233500       0.191300       0.168700       0.654000
57749     57749     hunan          109.9700       27.4597          130       160     2012      07        04        186              0.267583      29.266724       0.000000       0.273266       0.218500   -9999.000000       0.166400       0.452000
57749     57749     hunan          109.9700       27.4597          130       160     2012      07        05        187              0.250542      29.406647       0.000000       0.269638       0.218000       0.140100       0.169500   -9999.000000
57749     57749     hunan          109.9700       27.4597          130       160     2012      07        06        188              0.242542      29.896301       0.000000       0.267175   -9999.000000   -9999.000000   -9999.000000       0.543000
57749     57749     hunan          109.9700       27.4597          130       160     2012      07        07        189              0.237542      30.639496       0.000000       0.264117   -9999.000000       0.281200   -9999.000000   -9999.000000
57749     57749     hunan          109.9700       27.4597          130       160     2012      07        08        190              0.232625      30.188782       0.000000       0.261469       0.226500   -9999.000000       0.174900       0.453000
57749     57749     hunan          109.9700       27.4597          130       160     2012      07        09        191              0.233208      29.266998       0.000000       0.259147       0.215000   -9999.000000       0.120500       0.717000
57749     57749     hunan          109.9700       27.4597          130       160     2012      07        10        192              0.233042      29.562317       0.000000       0.255937       0.205000       0.160900       0.120900   -9999.000000
57749     57749     hunan          109.9700       27.4597          130       160     2012      07        11        193              0.232292      29.902252       0.000000       0.252887   -9999.000000   -9999.000000       0.116000       0.581000
57749     57749     hunan          109.9700       27.4597          130       160     2012      07        12        194              0.228833      30.326019       2.806872       0.250567   -9999.000000       0.138200   -9999.000000   -9999.000000
57749     57749     hunan          109.9700       27.4597          130       160     2012      07        13        195              0.230458      29.608459       2.239039       0.257146       0.307500       0.346300   -9999.000000       0.654000
57749     57749     hunan          109.9700       27.4597          130       160     2012      07        14        196              0.229667      28.319824       4.091369       0.261384       0.276000   -9999.000000       0.118800       1.000000
57749     57749     hunan          109.9700       27.4597          130       160     2012      07        15        197              0.297625      28.138367      57.747738       0.270595   -9999.000000       0.041500       0.061700   -9999.000000
57749     57749     hunan          109.9700       27.4597          130       160     2012      07        16        198              0.379875      27.022156     145.203156       0.326129   -9999.000000       0.184600       0.235600       1.000000
57749     57749     hunan          109.9700       27.4597          130       160     2012      07        17        199              0.367833      26.568756      79.128319       0.412709   -9999.000000       0.329700   -9999.000000   -9999.000000
57749     57749     hunan          109.9700       27.4597          130       160     2012      07        18        200              0.365583      26.262299      16.741295       0.584716       0.334000       0.295100   -9999.000000       1.000000
57749     57749     hunan          109.9700       27.4597          130       160     2012      07        19        201              0.360125      26.889618       0.234591       0.481691       0.285000   -9999.000000   -9999.000000   -9999.000000
57749     57749     hunan          109.9700       27.4597          130       160     2012      07        20        202              0.352917      28.464996       0.116129       0.332182       0.239500       0.168500       0.232900       0.696000
57749     57749     hunan          109.9700       27.4597          130       160     2012      07        21        203              0.340217      30.235474       0.000000       0.307374       0.473000       0.318800       0.232400       0.671000
57749     57749     hunan          109.9700       27.4597          130       160     2012      07        22        204              0.322167      30.572327       0.721383       0.295690   -9999.000000   -9999.000000       0.230800   -9999.000000
57749     57749     hunan          109.9700       27.4597          130       160     2012      07        23        205              0.315458      30.375946      18.640581       0.291093       0.500000       0.385300   -9999.000000       0.812000
57749     57749     hunan          109.9700       27.4597          130       160     2012      07        24        206              0.307208      28.856476       0.219691       0.310144       0.499000   -9999.000000   -9999.000000   -9999.000000
57749     57749     hunan          109.9700       27.4597          130       160     2012      07        25        207              0.301208      28.564056       5.402996       0.290790       0.500000   -9999.000000       0.233900       0.828000
57749     57749     hunan          109.9700       27.4597          130       160     2012      07        26        208              0.297208      29.305298       5.413489       0.293006       0.494000   -9999.000000       0.250900       0.708000
57749     57749     hunan          109.9700       27.4597          130       160     2012      07        27        209              0.292583      29.787323       6.391966       0.292874   -9999.000000   -9999.000000       0.236000   -9999.000000
57749     57749     hunan          109.9700       27.4597          130       160     2012      07        28        210              0.283542      29.142303      11.436677       0.294331   -9999.000000       0.167600       0.203800       0.764000
57749     57749     hunan          109.9700       27.4597          130       160     2012      07        29        211              0.274417      29.147064       0.566687       0.301097       0.493000   -9999.000000   -9999.000000   -9999.000000
57749     57749     hunan          109.9700       27.4597          130       160     2012      07        30        212              0.260667      29.813049       0.000000       0.285404       0.473500       0.078400   -9999.000000       0.584000
57749     57749     hunan          109.9700       27.4597          130       160     2012      07        31        213              0.248750      30.776337       0.479839       0.276687       0.500000       0.156100       0.246300       0.609000
57749     57749     hunan          109.9700       27.4597          130       160     2012      08        01        214              0.243458      30.231293       0.119678       0.274000       0.274000   -9999.000000       0.246000       0.498000
57749     57749     hunan          109.9700       27.4597          130       160     2012      08        02        215              0.242125      30.375458       0.000000       0.270302   -9999.000000       0.248100       0.244300       0.489000
57749     57749     hunan          109.9700       27.4597          130       160     2012      08        03        216              0.239167      29.743317       0.661512       0.266874       0.327000       0.184500   -9999.000000   -9999.000000
57749     57749     hunan          109.9700       27.4597          130       160     2012      08        04        217              0.238875      29.210632       7.788047       0.265162       0.327500       0.154700   -9999.000000       0.635000
57749     57749     hunan          109.9700       27.4597          130       160     2012      08        05        218              0.254542      29.150177      12.079941       0.275540       0.351000       0.384300   -9999.000000   -9999.000000
57749     57749     hunan          109.9700       27.4597          130       160     2012      08        06        219              0.297417      27.556641       7.897878       0.301908       0.329000   -9999.000000       0.212400       0.762000
57749     57749     hunan          109.9700       27.4597          130       160     2012      08        07        220              0.345625      28.245819       1.100046       0.295159   -9999.000000       0.292500       0.197800       0.720000
57749     57749     hunan          109.9700       27.4597          130       160     2012      08        08        221              0.338375      28.735535       0.547772       0.282526   -9999.000000       0.147600       0.198500   -9999.000000
57749     57749     hunan          109.9700       27.4597          130       160     2012      08        09        222              0.324125      29.576355       0.000000       0.271749       0.282500   -9999.000000   -9999.000000       0.541000
57749     57749     hunan          109.9700       27.4597          130       160     2012      08        10        223              0.306792      29.352020       0.000000       0.265406       0.304500       0.170400   -9999.000000   -9999.000000
57749     57749     hunan          109.9700       27.4597          130       160     2012      08        11        224              0.287667      29.496307       8.361352       0.261968       0.275000   -9999.000000       0.194200       0.428000
57749     57749     hunan          109.9700       27.4597          130       160     2012      08        12        225              0.272708      30.578644       0.315818       0.258747   -9999.000000       0.201500       0.209300       0.537000
57749     57749     hunan          109.9700       27.4597          130       160     2012      08        13        226              0.262708      31.077667       0.783949       0.256849   -9999.000000       0.263700       0.206800   -9999.000000
57749     57749     hunan          109.9700       27.4597          130       160     2012      08        14        227              0.257083      30.906586       1.410048       0.254437   -9999.000000   -9999.000000   -9999.000000       0.588000
57749     57749     hunan          109.9700       27.4597          130       160     2012      08        15        228              0.254750      30.361481       0.425648       0.257833       0.305500       0.184300   -9999.000000   -9999.000000
57749     57749     hunan          109.9700       27.4597          130       160     2012      08        16        229              0.251958      30.694580       1.164010       0.254056       0.265000   -9999.000000   -9999.000000       0.476000
57749     57749     hunan          109.9700       27.4597          130       160     2012      08        17        230              0.313250      30.687714      14.504306       0.247941       0.295000       0.152200       0.204200   -9999.000000
57749     57749     hunan          109.9700       27.4597          130       160     2012      08        18        231              0.336333      29.339203       1.061659       0.297667   -9999.000000   -9999.000000       0.200800       0.496000
57749     57749     hunan          109.9700       27.4597          130       160     2012      08        19        232              0.326250      30.544525       7.849819       0.267954       0.334000   -9999.000000       0.201400       0.547000
57749     57749     hunan          109.9700       27.4597          130       160     2012      08        20        233              0.302042      31.486420       3.752386       0.256065       0.292000       0.122900   -9999.000000   -9999.000000
57749     57749     hunan          109.9700       27.4597          130       160     2012      08        21        234              0.298917      31.494568       6.266592       0.248401       0.358000   -9999.000000   -9999.000000       1.000000
57749     57749     hunan          109.9700       27.4597          130       160     2012      08        22        235              0.299375      26.649109       1.879497       0.271493       0.344500       0.158400   -9999.000000   -9999.000000
57749     57749     hunan          109.9700       27.4597          130       160     2012      08        23        236              0.291167      25.632446       0.000000       0.255471   -9999.000000       0.256700       0.153500       0.374000
57749     57749     hunan          109.9700       27.4597          130       160     2012      08        24        237              0.287833      25.225098       4.055685       0.247785   -9999.000000   -9999.000000       0.143500       0.504000
57749     57749     hunan          109.9700       27.4597          130       160     2012      08        25        238              0.000000      25.699829       0.000000       0.246911       0.328000       0.132200       0.146800   -9999.000000
57749     57749     hunan          109.9700       27.4597          130       160     2012      08        26        239              0.265208      27.676941       0.000000       0.242637       0.321500       0.163300   -9999.000000       0.322000
57749     57749     hunan          109.9700       27.4597          130       160     2012      08        27        240              0.255375      28.419495      13.103411       0.238232       0.313500   -9999.000000   -9999.000000   -9999.000000
57749     57749     hunan          109.9700       27.4597          130       160     2012      08        28        241              0.246667      28.447052       0.000000       0.234017       0.294000       0.349300       0.170100       0.404000
57749     57749     hunan          109.9700       27.4597          130       160     2012      08        29        242              0.245375      29.049469       3.967930       0.229970   -9999.000000   -9999.000000       0.183000       0.558000
57749     57749     hunan          109.9700       27.4597          130       160     2012      08        30        243              0.243167      28.906952       1.126199       0.230143       0.374000       0.181800       0.179400       0.411000
57749     57749     hunan          109.9700       27.4597          130       160     2012      08        31        244              0.240417      29.596344       1.221964       0.229069       0.342500       0.217100   -9999.000000       0.490000
57749     57749     hunan          109.9700       27.4597          130       160     2012      09        01        245              0.240042      29.653442       4.160802       0.233376       0.224000   -9999.000000   -9999.000000   -9999.000000
57749     57749     hunan          109.9700       27.4597          130       160     2012      09        02        246              0.249958      30.426941      21.450247       0.240552   -9999.000000       0.312100   -9999.000000       0.861000
57749     57749     hunan          109.9700       27.4597          130       160     2012      09        03        247              0.268417      27.822174       0.185776       0.287696   -9999.000000   -9999.000000       0.148700   -9999.000000
57749     57749     hunan          109.9700       27.4597          130       160     2012      09        04        248              0.266208      23.910706       0.378042       0.280280   -9999.000000       0.130800       0.146100       0.397000
57749     57749     hunan          109.9700       27.4597          130       160     2012      09        05        249              0.258833      25.898132       0.114838       0.263685       0.227500       0.326400       0.150300       0.630000
57749     57749     hunan          109.9700       27.4597          130       160     2012      09        06        250              0.249333      27.048920       0.982652       0.254450       0.228500   -9999.000000   -9999.000000   -9999.000000
57749     57749     hunan          109.9700       27.4597          130       160     2012      09        07        251              0.247083      27.600189       0.000000       0.249335       0.234500       0.168300   -9999.000000       0.533000
57749     57749     hunan          109.9700       27.4597          130       160     2012      09        08        252              0.244083      29.272644       0.078063       0.244525   -9999.000000   -9999.000000       0.145900   -9999.000000
57749     57749     hunan          109.9700       27.4597          130       160     2012      09        09        253              0.238875      29.478424       0.610357       0.239705   -9999.000000       0.194200       0.164600       0.331000
57749     57749     hunan          109.9700       27.4597          130       160     2012      09        10        254              0.237125      26.973785       0.437609       0.238686       0.271000       0.249200       0.197900       0.566000
57749     57749     hunan          109.9700       27.4597          130       160     2012      09        11        255              0.236667      26.254822       0.000000       0.241908       0.221500   -9999.000000       0.196900   -9999.000000
57749     57749     hunan          109.9700       27.4597          130       160     2012      09        12        256              0.291625      27.948578      41.390217       0.236990       0.280000       0.405600   -9999.000000       1.000000
57749     57749     hunan          109.9700       27.4597          130       160     2012      09        13        257              0.340333      24.917847       2.325349       0.306167   -9999.000000       0.305100   -9999.000000   -9999.000000
57749     57749     hunan          109.9700       27.4597          130       160     2012      09        14        258              0.326958      21.032562       0.533311       0.295914   -9999.000000       0.281300       0.196400       0.406000
57749     57749     hunan          109.9700       27.4597          130       160     2012      09        15        259              0.320833      22.652130       0.000000       0.275807       0.236000       0.195700       0.201400   -9999.000000
57749     57749     hunan          109.9700       27.4597          130       160     2012      09        16        260              0.320125      22.968475       2.908720       0.265401       0.246500   -9999.000000       0.214100       0.540000
57749     57749     hunan          109.9700       27.4597          130       160     2012      09        17        261              0.309000      21.287384       0.000000       0.272952       0.227000       0.247000   -9999.000000       0.442000
57749     57749     hunan          109.9700       27.4597          130       160     2012      09        18        262              0.305542      22.623627       1.338542       0.261847       0.218500       0.238200   -9999.000000   -9999.000000
57749     57749     hunan          109.9700       27.4597          130       160     2012      09        19        263              0.300375      23.671143       0.000000       0.256547   -9999.000000   -9999.000000   -9999.000000       0.432000
57749     57749     hunan          109.9700       27.4597          130       160     2012      09        20        264              0.347667      25.073242      53.765125       0.251256   -9999.000000       0.349300       0.145600   -9999.000000
57749     57749     hunan          109.9700       27.4597          130       160     2012      09        21        265              0.376167      22.779877       9.750593       0.315111   -9999.000000   -9999.000000       0.149100       0.962000
57749     57749     hunan          109.9700       27.4597          130       160     2012      09        22        266              0.369667      22.413361      14.052849       0.314469       0.236000   -9999.000000       0.150800       0.986000
57749     57749     hunan          109.9700       27.4597          130       160     2012      09        23        267              0.390208      22.224670      55.203793       0.312100       0.273000       0.416900   -9999.000000   -9999.000000
57749     57749     hunan          109.9700       27.4597          130       160     2012      09        24        268              0.357083      21.576202       0.770331       0.338664       0.236000   -9999.000000   -9999.000000       0.952000
57749     57749     hunan          109.9700       27.4597          130       160     2012      09        25        269              0.354458      22.288910       0.202038       0.300678   -9999.000000       0.329300       0.138700   -9999.000000
57749     57749     hunan          109.9700       27.4597          130       160     2012      09        26        270              0.352958      23.057312       0.594490       0.294495       0.249000   -9999.000000       0.146600       0.645000
57749     57749     hunan          109.9700       27.4597          130       160     2012      09        27        271              0.351071      23.568237       0.000000       0.290489       0.219000       0.181100       0.133900       0.654000
57749     57749     hunan          109.9700       27.4597          130       160     2012      09        28        272              0.337333      23.698181       0.000000       0.286356       0.195500   -9999.000000       0.133900       0.462000
57749     57749     hunan          109.9700       27.4597          130       160     2012      09        29        273              0.334917      22.938904       0.168849       0.281218       0.177000   -9999.000000   -9999.000000       0.342000
57749     57749     hunan          109.9700       27.4597          130       160     2012      09        30        274              0.321875      22.191376       0.000000       0.277401   -9999.000000       0.105800   -9999.000000   -9999.000000
57749     57749     hunan          109.9700       27.4597          130       160     2012      10        01        275              0.309333      22.062042       0.000000       0.275263   -9999.000000   -9999.000000       0.138100       0.409000
57749     57749     hunan          109.9700       27.4597          130       160     2012      10        02        276              0.294500      22.168152       2.388509       0.273479       0.125000       0.190800       0.137400   -9999.000000
57749     57749     hunan          109.9700       27.4597          130       160     2012      10        03        277              0.287792      23.125000       3.121902       0.275468       0.165000       0.461700       0.147400       0.628000
57749     57749     hunan          109.9700       27.4597          130       160     2012      10        04        278              0.333042      20.078003      19.411940       0.285192       0.180000   -9999.000000   -9999.000000       0.902000
57749     57749     hunan          109.9700       27.4597          130       160     2012      10        05        279              0.347208      18.945984       2.837109       0.311879   -9999.000000       0.231600   -9999.000000   -9999.000000
57749     57749     hunan          109.9700       27.4597          130       160     2012      10        06        280              0.335792      18.624329       0.564663       0.297206   -9999.000000       0.118700   -9999.000000       0.734000
57749     57749     hunan          109.9700       27.4597          130       160     2012      10        07        281              0.330917      19.280701       0.000000       0.286119       0.159000   -9999.000000       0.157000   -9999.000000
57749     57749     hunan          109.9700       27.4597          130       160     2012      10        08        282              0.327625      19.751404       1.946111       0.282269       0.166000       0.208500       0.084600       0.539000
57749     57749     hunan          109.9700       27.4597          130       160     2012      10        09        283              0.327208      19.666748       0.642144       0.283464       0.135500   -9999.000000       0.083200       0.856000
57749     57749     hunan          109.9700       27.4597          130       160     2012      10        10        284              0.330625      19.972229       0.000000       0.284196       0.137000       0.152600   -9999.000000   -9999.000000
57749     57749     hunan          109.9700       27.4597          130       160     2012      10        11        285              0.330083      21.602325       0.000000       0.278112   -9999.000000       0.308600   -9999.000000       0.488000
57749     57749     hunan          109.9700       27.4597          130       160     2012      10        12        286              0.327542      20.540558       4.031268       0.275897   -9999.000000   -9999.000000       0.080300   -9999.000000
57749     57749     hunan          109.9700       27.4597          130       160     2012      10        13        287              0.322917      19.829468       3.981266       0.275902       0.197000       0.173600       0.092900       0.764000
57749     57749     hunan          109.9700       27.4597          130       160     2012      10        14        288              0.326542      18.302246       0.684832       0.284893       0.194000   -9999.000000       0.091800   -9999.000000
57749     57749     hunan          109.9700       27.4597          130       160     2012      10        15        289              0.326125      17.930237       0.461046       0.282975       0.177500       0.146600       0.145400       0.549000
57749     57749     hunan          109.9700       27.4597          130       160     2012      10        16        290              0.340875      18.626587       4.171106       0.278637   -9999.000000       0.188000   -9999.000000       0.801000
57749     57749     hunan          109.9700       27.4597          130       160     2012      10        17        291              0.344750      18.228088       0.000000       0.287046   -9999.000000   -9999.000000   -9999.000000   -9999.000000
57749     57749     hunan          109.9700       27.4597          130       160     2012      10        18        292              0.343750      18.582397       2.396714       0.275898       0.166000       0.244400       0.143900       0.346000
57749     57749     hunan          109.9700       27.4597          130       160     2012      10        19        293              0.344125      19.126495       0.840079       0.272174       0.162000       0.295100       0.142400   -9999.000000
57749     57749     hunan          109.9700       27.4597          130       160     2012      10        20        294              0.340625      19.320953       0.162085       0.272633       0.150500       0.178500       0.145200       0.531000
57749     57749     hunan          109.9700       27.4597          130       160     2012      10        21        295              0.337708      21.072083       0.661223       0.273522       0.187000       0.327800   -9999.000000       0.519000
57749     57749     hunan          109.9700       27.4597          130       160     2012      10        22        296              0.367583      21.849182      20.888260       0.274642   -9999.000000   -9999.000000   -9999.000000   -9999.000000
57749     57749     hunan          109.9700       27.4597          130       160     2012      10        23        297              0.348250      17.251495       0.000000       0.308390   -9999.000000       0.238700   -9999.000000       0.408000
57749     57749     hunan          109.9700       27.4597          130       160     2012      10        24        298              0.341083      18.245636       4.888419       0.283185   -9999.000000       0.268900       0.074000   -9999.000000
57749     57749     hunan          109.9700       27.4597          130       160     2012      10        25        299              0.000000      16.339569       0.527677       0.278410       0.210500   -9999.000000       0.069200       0.417000
57749     57749     hunan          109.9700       27.4597          130       160     2012      10        26        300              0.339250      17.111145       0.431553       0.276570       0.197000       0.281200       0.071000       0.603000
57749     57749     hunan          109.9700       27.4597          130       160     2012      10        27        301              0.335083      17.893555       0.000000       0.276411   -9999.000000   -9999.000000   -9999.000000       0.415000
57749     57749     hunan          109.9700       27.4597          130       160     2012      10        28        302              0.000000      18.044617       6.730835       0.275027   -9999.000000       0.231100   -9999.000000       0.756000
57749     57749     hunan          109.9700       27.4597          130       160     2012      10        29        303              0.382917      20.126007      21.278664       0.282743       0.243500       0.288300       0.147400   -9999.000000
57749     57749     hunan          109.9700       27.4597          130       160     2012      10        30        304              0.360875      18.644287       0.451142       0.313515       0.202000   -9999.000000       0.138400       0.560000
57749     57749     hunan          109.9700       27.4597          130       160     2012      10        31        305              0.346708      17.129425       0.188006       0.290636       0.186000       0.178000       0.139700   -9999.000000
57749     57749     hunan          109.9700       27.4597          130       160     2012      11        01        306              0.345333      17.624298       0.106326       0.280724       0.164000   -9999.000000   -9999.000000       0.352000
57749     57749     hunan          109.9700       27.4597          130       160     2012      11        02        307              0.343500      17.042603       1.054218       0.277550   -9999.000000       0.171800   -9999.000000       0.582000
57749     57749     hunan          109.9700       27.4597          130       160     2012      11        03        308              0.358583      18.673615       8.133045       0.276781       0.194000       0.187900   -9999.000000   -9999.000000
57749     57749     hunan          109.9700       27.4597          130       160     2012      11        04        309              0.352583      16.107910       0.297450       0.295249       0.179500   -9999.000000       0.141700       0.409000
57749     57749     hunan          109.9700       27.4597          130       160     2012      11        05        310              0.364750      16.248413       5.259780       0.279864       0.190500       0.248700       0.112600   -9999.000000
57749     57749     hunan          109.9700       27.4597          130       160     2012      11        06        311              0.364375      14.658081      18.495436       0.289731       0.187000       0.180000       0.111900       0.727000
57749     57749     hunan          109.9700       27.4597          130       160     2012      11        07        312              0.404391      14.697388      47.999260       0.300143   -9999.000000       0.311900   -9999.000000       0.850000
57749     57749     hunan          109.9700       27.4597          130       160     2012      11        08        313              0.373333      13.030212       4.019323       0.338710   -9999.000000       0.313700   -9999.000000   -9999.000000
57749     57749     hunan          109.9700       27.4597          130       160     2012      11        09        314              0.365958      12.847931      10.051915       0.312329       0.237500   -9999.000000       0.115200       0.767000
57749     57749     hunan          109.9700       27.4597          130       160     2012      11        10        315              0.367667      12.286285       1.447044       0.311713       0.204000       0.262000       0.115500   -9999.000000
57749     57749     hunan          109.9700       27.4597          130       160     2012      11        11        316              0.354958      13.282898       7.244429       0.303575       0.147500       0.403400       0.110400       0.377000
57749     57749     hunan          109.9700       27.4597          130       160     2012      11        12        317              0.351667      14.299469       0.000000       0.297985   -9999.000000   -9999.000000       0.119300   -9999.000000
57749     57749     hunan          109.9700       27.4597          130       160     2012      11        13        318              0.000000      13.129944       0.196444       0.295458   -9999.000000       0.296000   -9999.000000       0.437000
57749     57749     hunan          109.9700       27.4597          130       160     2012      11        14        319              0.348000      15.011414       1.975653       0.291936       0.184000   -9999.000000   -9999.000000       0.505000
57749     57749     hunan          109.9700       27.4597          130       160     2012      11        15        320              0.391833      14.634583      26.729383       0.291137       0.198000       0.222900       0.141600   -9999.000000
57749     57749     hunan          109.9700       27.4597          130       160     2012      11        16        321              0.379042      12.270874       4.748251       0.319320   -9999.000000       0.333000       0.127600       0.422000
57749     57749     hunan          109.9700       27.4597          130       160     2012      11        17        322              0.000000      10.407806       0.000000       0.310359       0.152000   -9999.000000       0.120900   -9999.000000
57749     57749     hunan          109.9700       27.4597          130       160     2012      11        18        323              0.354917      10.924561       0.000000       0.298219   -9999.000000       0.144100   -9999.000000       0.423000
57749     57749     hunan          109.9700       27.4597          130       160     2012      11        19        324              0.351958      10.102722       0.000000       0.295454       0.184000   -9999.000000   -9999.000000       0.454000
57749     57749     hunan          109.9700       27.4597          130       160     2012      11        20        325              0.350583      11.194275       1.219561       0.292627       0.192000       0.105500   -9999.000000   -9999.000000
57749     57749     hunan          109.9700       27.4597          130       160     2012      11        21        326              0.356167      11.345367       2.270856       0.291439       0.167500       0.278900       0.088100       0.453000
57749     57749     hunan          109.9700       27.4597          130       160     2012      11        22        327              0.371250      11.021271       0.875663       0.291596       0.157000   -9999.000000       0.075400   -9999.000000
57749     57749     hunan          109.9700       27.4597          130       160     2012      11        23        328              0.360958      10.525543       0.000000       0.290934   -9999.000000       0.256700       0.077700       0.606000
57749     57749     hunan          109.9700       27.4597          130       160     2012      11        24        329              0.359417       9.654572       5.330860       0.285948   -9999.000000       0.194000   -9999.000000       0.430000
57749     57749     hunan          109.9700       27.4597          130       160     2012      11        25        330              0.373375       8.970856       0.828263       0.291320       0.165500       0.310200   -9999.000000       0.345000
57749     57749     hunan          109.9700       27.4597          130       160     2012      11        26        331              0.358208       8.841064       0.215705       0.292076       0.145500       0.260700   -9999.000000       0.377000
57749     57749     hunan          109.9700       27.4597          130       160     2012      11        27        332              0.354542      10.417175       0.478217       0.284941       0.160500   -9999.000000       0.064100   -9999.000000
57749     57749     hunan          109.9700       27.4597          130       160     2012      11        28        333              0.351875       9.139771       0.000000       0.284381       0.146000       0.205000       0.065300       0.385000
57749     57749     hunan          109.9700       27.4597          130       160     2012      11        29        334              0.350042      10.029755       0.172845       0.283440   -9999.000000       0.226500       0.070200   -9999.000000
57749     57749     hunan          109.9700       27.4597          130       160     2012      11        30        335              0.348417       8.453735       1.657057       0.283003       0.178000   -9999.000000   -9999.000000       0.334000
57749     57749     hunan          109.9700       27.4597          130       160     2012      12        01        336              0.348000       7.947052       0.513836       0.284775       0.155000       0.200400   -9999.000000       0.461000
57749     57749     hunan          109.9700       27.4597          130       160     2012      12        02        337              0.348292       8.426605       2.599679       0.285653       0.144000   -9999.000000       0.063700   -9999.000000
57749     57749     hunan          109.9700       27.4597          130       160     2012      12        03        338              0.347000       8.779144       0.238564       0.282341       0.136000       0.272000       0.068200       0.340000
57749     57749     hunan          109.9700       27.4597          130       160     2012      12        04        339              0.346917       9.958801       0.000000       0.280215   -9999.000000       0.145400       0.074100   -9999.000000
57749     57749     hunan          109.9700       27.4597          130       160     2012      12        05        340              0.344625       8.190338       0.000000       0.279868   -9999.000000   -9999.000000   -9999.000000       0.424000
57749     57749     hunan          109.9700       27.4597          130       160     2012      12        06        341              0.343917       9.955750       0.316060       0.278171       0.148000       0.201000   -9999.000000       0.330000
57749     57749     hunan          109.9700       27.4597          130       160     2012      12        07        342              0.343250       9.300537       0.000000       0.277711       0.147500   -9999.000000   -9999.000000   -9999.000000
57749     57749     hunan          109.9700       27.4597          130       160     2012      12        08        343              0.341625       8.774200       1.758471       0.277739       0.143000       0.136100       0.076600       0.409000
57749     57749     hunan          109.9700       27.4597          130       160     2012      12        09        344              0.358667      11.202087      28.975224       0.278103   -9999.000000       0.347800       0.074200   -9999.000000
57749     57749     hunan          109.9700       27.4597          130       160     2012      12        10        345              0.377375       7.329742       7.613127       0.312624   -9999.000000   -9999.000000       0.056900       0.444000
57749     57749     hunan          109.9700       27.4597          130       160     2012      12        11        346              0.358625       5.867126       2.694647       0.310454       0.162000       0.221600   -9999.000000   -9999.000000
57749     57749     hunan          109.9700       27.4597          130       160     2012      12        12        347              0.365167       6.692841       4.267067       0.292823       0.179500       0.284600   -9999.000000       0.459000
57749     57749     hunan          109.9700       27.4597          130       160     2012      12        13        348              0.368792       6.456085       1.497797       0.294904       0.151000       0.262400       0.059000       0.614000
57749     57749     hunan          109.9700       27.4597          130       160     2012      12        14        349              0.357542       6.612335       0.188362       0.293683       0.149000       0.372200       0.059800   -9999.000000
57749     57749     hunan          109.9700       27.4597          130       160     2012      12        15        350              0.000000       6.549713       1.522445       0.286933   -9999.000000   -9999.000000       0.058100       0.368000
57749     57749     hunan          109.9700       27.4597          130       160     2012      12        16        351              0.358250       6.074982       2.788978       0.287558       0.177000       0.284100   -9999.000000   -9999.000000
57749     57749     hunan          109.9700       27.4597          130       160     2012      12        17        352              0.360875       6.384735       8.530677       0.288318       0.170000       0.159900   -9999.000000       0.381000
57749     57749     hunan          109.9700       27.4597          130       160     2012      12        18        353              0.356375       5.513214       0.774635       0.301482       0.153000   -9999.000000   -9999.000000       0.552000
57749     57749     hunan          109.9700       27.4597          130       160     2012      12        19        354              0.354458       5.349548       4.341357       0.288453       0.172000       0.341200       0.061800   -9999.000000
57749     57749     hunan          109.9700       27.4597          130       160     2012      12        20        355              0.000000       3.842285       6.256050       0.292288   -9999.000000   -9999.000000       0.054300       0.424000
57749     57749     hunan          109.9700       27.4597          130       160     2012      12        21        356              0.363500       3.487061       0.083558       0.300054   -9999.000000       0.275300       0.055800   -9999.000000
57749     57749     hunan          109.9700       27.4597          130       160     2012      12        22        357              0.353958       3.910065       0.186623       0.291152   -9999.000000       0.224700   -9999.000000       0.307000
57749     57749     hunan          109.9700       27.4597          130       160     2012      12        23        358              0.350125       4.790405       1.046240       0.286008       0.126000   -9999.000000   -9999.000000       0.489000
57749     57749     hunan          109.9700       27.4597          130       160     2012      12        24        359              0.347444       5.336853       0.400767       0.283206       0.117000   -9999.000000       0.057000       0.159000
57749     57749     hunan          109.9700       27.4597          130       160     2012      12        25        360              0.346125       6.310059       5.564439       0.282830       0.143000   -9999.000000       0.066900       0.203000
57749     57749     hunan          109.9700       27.4597          130       160     2012      12        26        361              0.000000       4.261993       5.536196       0.284065   -9999.000000   -9999.000000       0.063600   -9999.000000
57749     57749     hunan          109.9700       27.4597          130       160     2012      12        27        362              0.372667       2.589050       2.613540       0.294402   -9999.000000   -9999.000000       0.062000       0.768000
57749     57749     hunan          109.9700       27.4597          130       160     2012      12        28        363              0.358000       2.284760      11.013219       0.298985       0.171000   -9999.000000   -9999.000000   -9999.000000
57749     57749     hunan          109.9700       27.4597          130       160     2012      12        29        364              0.000000       2.336975       3.727659       0.292699   -9999.000000   -9999.000000   -9999.000000       0.558000
57749     57749     hunan          109.9700       27.4597          130       160     2012      12        30        365              0.000000       2.217468       0.726666       0.300829   -9999.000000   -9999.000000       0.057600       0.595000
57749     57749     hunan          109.9700       27.4597          130       160     2012      12        31        366              0.350800       2.970520       0.233435       0.299495   -9999.000000       0.165400       0.062100   -9999.000000
