# Supplementary material for: Research on Fusing Multisatellite Soil Moisture Data Based on Bayesian Model Averaging
Source: Hindawi journal article supplement (doi:10.1155/2018/9310838), 2018-06-25
Supplement: f1 [file 9310838.f1.zip › 2012_sm00-10cm_daily_ZDB_ZHY_57774_366days_allin.txt]

57774     57774     hunan          112.1667       27.4500          130       169     2012      01        01        001              0.000000   -9999.000000       0.380787   -9999.000000       0.099000   -9999.000000       0.067700   -9999.000000
57774     57774     hunan          112.1667       27.4500          130       169     2012      01        02        002              0.055875       5.134277       7.966838       0.354932       0.121000       0.125200   -9999.000000       0.539000
57774     57774     hunan          112.1667       27.4500          130       169     2012      01        03        003              0.000000       4.891693       6.280752       0.361632   -9999.000000       0.173100   -9999.000000       0.454000
57774     57774     hunan          112.1667       27.4500          130       169     2012      01        04        004              0.058917       2.184052       0.500153       0.359664   -9999.000000       0.210700   -9999.000000   -9999.000000
57774     57774     hunan          112.1667       27.4500          130       169     2012      01        05        005              0.058833       3.666046       0.490127       0.355241   -9999.000000       0.160000       0.073300       0.355000
57774     57774     hunan          112.1667       27.4500          130       169     2012      01        06        006              0.058000       2.862762       0.000000       0.353914       0.115000   -9999.000000       0.074600   -9999.000000
57774     57774     hunan          112.1667       27.4500          130       169     2012      01        07        007              0.058000       3.586029       0.000000       0.351266       0.118000       0.197800       0.074700       0.266000
57774     57774     hunan          112.1667       27.4500          130       169     2012      01        08        008              0.000000       3.663177       0.000000       0.349348       0.104000       0.140000   -9999.000000       0.220000
57774     57774     hunan          112.1667       27.4500          130       169     2012      01        09        009              0.057000       4.066467       0.000000       0.347919   -9999.000000   -9999.000000   -9999.000000   -9999.000000
57774     57774     hunan          112.1667       27.4500          130       169     2012      01        10        010              0.057000       4.039185       0.000000       0.347167       0.120000       0.086700       0.060900       0.160000
57774     57774     hunan          112.1667       27.4500          130       169     2012      01        11        011              0.057000       4.590637       0.000000       0.346360       0.102000   -9999.000000       0.060100   -9999.000000
57774     57774     hunan          112.1667       27.4500          130       169     2012      01        12        012              0.057000       4.562469       1.509823       0.345610       0.109000       0.140500       0.061500       0.185000
57774     57774     hunan          112.1667       27.4500          130       169     2012      01        13        013              0.058208       4.939178       3.272255       0.346687       0.123500   -9999.000000   -9999.000000   -9999.000000
57774     57774     hunan          112.1667       27.4500          130       169     2012      01        14        014              0.062708       4.279938      21.372963       0.349405   -9999.000000   -9999.000000   -9999.000000       0.702000
57774     57774     hunan          112.1667       27.4500          130       169     2012      01        15        015              0.062458       3.887878      14.395891       0.366546   -9999.000000   -9999.000000   -9999.000000       0.805000
57774     57774     hunan          112.1667       27.4500          130       169     2012      01        16        016              0.060000       2.705292       0.497770       0.370499   -9999.000000   -9999.000000       0.066300   -9999.000000
57774     57774     hunan          112.1667       27.4500          130       169     2012      01        17        017              0.000000       3.946381      16.318230       0.357740   -9999.000000       0.263200       0.078500       0.591000
57774     57774     hunan          112.1667       27.4500          130       169     2012      01        18        018              0.063125       4.429901       5.820784       0.366703   -9999.000000       0.323600       0.070200   -9999.000000
57774     57774     hunan          112.1667       27.4500          130       169     2012      01        19        019              0.061875       3.920441       4.464076       0.368671   -9999.000000   -9999.000000   -9999.000000       0.545000
57774     57774     hunan          112.1667       27.4500          130       169     2012      01        20        020              0.061875       3.698578       6.415618       0.366117   -9999.000000       0.192800   -9999.000000       0.703000
57774     57774     hunan          112.1667       27.4500          130       169     2012      01        21        021              0.062542       3.669586       2.468323       0.365685   -9999.000000   -9999.000000   -9999.000000   -9999.000000
57774     57774     hunan          112.1667       27.4500          130       169     2012      01        22        022              0.061167       2.050507       0.534029       0.356364   -9999.000000   -9999.000000       0.063800       0.209000
57774     57774     hunan          112.1667       27.4500          130       169     2012      01        23        023              0.061333       1.182800       2.288656       0.331900   -9999.000000       0.324800       0.067300   -9999.000000
57774     57774     hunan          112.1667       27.4500          130       169     2012      01        24        024              0.061125       1.149139       0.371027       0.329468   -9999.000000   -9999.000000   -9999.000000       0.235000
57774     57774     hunan          112.1667       27.4500          130       169     2012      01        25        025              0.060333       1.473083       1.907316       0.321085   -9999.000000       0.161400   -9999.000000   -9999.000000
57774     57774     hunan          112.1667       27.4500          130       169     2012      01        26        026              0.060000       3.042969       0.000000       0.338522   -9999.000000       0.380900   -9999.000000       0.336000
57774     57774     hunan          112.1667       27.4500          130       169     2012      01        27        027              0.060000       2.152771       0.618820       0.345374   -9999.000000       0.167100       0.069800   -9999.000000
57774     57774     hunan          112.1667       27.4500          130       169     2012      01        28        028              0.060000       2.962830       0.000000       0.347483       0.109000       0.243400       0.064400   -9999.000000
57774     57774     hunan          112.1667       27.4500          130       169     2012      01        29        029              0.060000       3.961212       0.000000       0.347064       0.105000   -9999.000000       0.061300       0.402000
57774     57774     hunan          112.1667       27.4500          130       169     2012      01        30        030              0.059917       5.667267       0.000000       0.345727   -9999.000000       0.050000   -9999.000000   -9999.000000
57774     57774     hunan          112.1667       27.4500          130       169     2012      01        31        031              0.059792       4.914856       0.000000       0.344949   -9999.000000       0.370700   -9999.000000       0.180000
57774     57774     hunan          112.1667       27.4500          130       169     2012      02        01        032              0.059042       7.126770       0.653496       0.343304       0.127500   -9999.000000   -9999.000000       0.297000
57774     57774     hunan          112.1667       27.4500          130       169     2012      02        02        033              0.060125       5.923096       0.503431       0.343928   -9999.000000       0.077700       0.073800   -9999.000000
57774     57774     hunan          112.1667       27.4500          130       169     2012      02        03        034              0.061542       2.597778       3.033696       0.343045       0.136000   -9999.000000       0.085800       0.350000
57774     57774     hunan          112.1667       27.4500          130       169     2012      02        04        035              0.061000       3.915619       0.275251       0.346943   -9999.000000       0.190100       0.081800   -9999.000000
57774     57774     hunan          112.1667       27.4500          130       169     2012      02        05        036              0.062417       4.193909       8.171774       0.344624   -9999.000000       0.209800   -9999.000000       0.563000
57774     57774     hunan          112.1667       27.4500          130       169     2012      02        06        037              0.062583       4.470245       1.009142       0.351361       0.150000   -9999.000000   -9999.000000       0.437000
57774     57774     hunan          112.1667       27.4500          130       169     2012      02        07        038              0.061500       4.856018       0.000000       0.349757   -9999.000000       0.154100       0.059700   -9999.000000
57774     57774     hunan          112.1667       27.4500          130       169     2012      02        08        039              0.060292       5.035553       0.000000       0.343477   -9999.000000   -9999.000000       0.070100       0.266000
57774     57774     hunan          112.1667       27.4500          130       169     2012      02        09        040              0.060042       2.915802       2.336465       0.340210   -9999.000000       0.060500       0.067100   -9999.000000
57774     57774     hunan          112.1667       27.4500          130       169     2012      02        10        041              0.061083       2.361725       1.283906       0.340455   -9999.000000       0.090300       0.061000       0.270000
57774     57774     hunan          112.1667       27.4500          130       169     2012      02        11        042              0.060958       3.190155       1.355526       0.340228       0.148000   -9999.000000   -9999.000000   -9999.000000
57774     57774     hunan          112.1667       27.4500          130       169     2012      02        12        043              0.060458       4.375092       3.964768       0.340829       0.152000       0.154700   -9999.000000       0.391000
57774     57774     hunan          112.1667       27.4500          130       169     2012      02        13        044              0.061583       4.345215       0.755265       0.345243       0.151000       0.149400   -9999.000000       0.552000
57774     57774     hunan          112.1667       27.4500          130       169     2012      02        14        045              0.061833       4.618774       0.236015       0.345143       0.131000   -9999.000000       0.071700   -9999.000000
57774     57774     hunan          112.1667       27.4500          130       169     2012      02        15        046              0.061000       4.593872       0.076907       0.342322   -9999.000000       0.266800       0.075700       0.457000
57774     57774     hunan          112.1667       27.4500          130       169     2012      02        16        047              0.061000       4.357361       0.000000       0.341066   -9999.000000   -9999.000000   -9999.000000   -9999.000000
57774     57774     hunan          112.1667       27.4500          130       169     2012      02        17        048              0.060958       4.428284       0.000000       0.339904       0.115000       0.083700   -9999.000000       0.349000
57774     57774     hunan          112.1667       27.4500          130       169     2012      02        18        049              0.060333       5.994293       0.000000       0.338519       0.103000   -9999.000000   -9999.000000       0.333000
57774     57774     hunan          112.1667       27.4500          130       169     2012      02        19        050              0.060708       4.412445       1.027421       0.337781       0.104000   -9999.000000       0.067400   -9999.000000
57774     57774     hunan          112.1667       27.4500          130       169     2012      02        20        051              0.060917       8.209259       0.352877       0.336426   -9999.000000       0.137800       0.059500       0.281000
57774     57774     hunan          112.1667       27.4500          130       169     2012      02        21        052              0.060583       7.952881       0.231780       0.337504   -9999.000000   -9999.000000   -9999.000000   -9999.000000
57774     57774     hunan          112.1667       27.4500          130       169     2012      02        22        053              0.064083       7.687439      28.511311       0.336411       0.113000   -9999.000000   -9999.000000       0.493000
57774     57774     hunan          112.1667       27.4500          130       169     2012      02        23        054              0.067458       7.584137       9.086649       0.358686       0.122500       0.294200   -9999.000000       0.829000
57774     57774     hunan          112.1667       27.4500          130       169     2012      02        24        055              0.065292       7.744293       4.804826       0.364197   -9999.000000   -9999.000000       0.063700       0.632000
57774     57774     hunan          112.1667       27.4500          130       169     2012      02        25        056              0.063917       5.676208       0.663908       0.354944   -9999.000000       0.248000       0.067900       0.455000
57774     57774     hunan          112.1667       27.4500          130       169     2012      02        26        057              0.062958       4.647400       0.000000       0.350055   -9999.000000   -9999.000000       0.066200   -9999.000000
57774     57774     hunan          112.1667       27.4500          130       169     2012      02        27        058              0.062000       3.716766       0.000000       0.347402   -9999.000000   -9999.000000   -9999.000000       0.423000
57774     57774     hunan          112.1667       27.4500          130       169     2012      02        28        059              0.062125       4.868896       3.690170       0.345997       0.112500       0.297300   -9999.000000   -9999.000000
57774     57774     hunan          112.1667       27.4500          130       169     2012      02        29        060              0.000000   -9999.000000       0.188888   -9999.000000   -9999.000000   -9999.000000   -9999.000000   -9999.000000
57774     57774     hunan          112.1667       27.4500          130       169     2012      03        01        061              0.062833       7.830383       0.156705       0.348235       0.152000       0.198900       0.063800       0.337000
57774     57774     hunan          112.1667       27.4500          130       169     2012      03        02        062              0.063167       6.887299       8.141766       0.348008   -9999.000000   -9999.000000       0.073000   -9999.000000
57774     57774     hunan          112.1667       27.4500          130       169     2012      03        03        063              0.065250       6.505371      31.467018       0.355902   -9999.000000       0.227900       0.070100       0.735000
57774     57774     hunan          112.1667       27.4500          130       169     2012      03        04        064              0.070208       6.260529      36.179382       0.374918   -9999.000000       0.300700   -9999.000000   -9999.000000
57774     57774     hunan          112.1667       27.4500          130       169     2012      03        05        065              0.065750       5.378662       0.000000       0.450972   -9999.000000   -9999.000000   -9999.000000       0.567000
57774     57774     hunan          112.1667       27.4500          130       169     2012      03        06        066              0.064125       6.578430       2.413656       0.432782   -9999.000000       0.153600   -9999.000000       0.404000
57774     57774     hunan          112.1667       27.4500          130       169     2012      03        07        067              0.000000       6.544464       0.932147       0.377722   -9999.000000       0.311000       0.071500   -9999.000000
57774     57774     hunan          112.1667       27.4500          130       169     2012      03        08        068              0.064625       6.635010       7.128761       0.363627       0.183000   -9999.000000       0.067900       0.654000
57774     57774     hunan          112.1667       27.4500          130       169     2012      03        09        069              0.065083       5.794342       0.789182       0.363072   -9999.000000       0.120600       0.067800   -9999.000000
57774     57774     hunan          112.1667       27.4500          130       169     2012      03        10        070              0.063958       5.362671       0.616143       0.359439       0.115000   -9999.000000   -9999.000000       0.382000
57774     57774     hunan          112.1667       27.4500          130       169     2012      03        11        071              0.063167       7.957886       0.350431       0.353487       0.108000       0.170800   -9999.000000   -9999.000000
57774     57774     hunan          112.1667       27.4500          130       169     2012      03        12        072              0.063000       9.552490       0.394898       0.350023   -9999.000000       0.376900       0.057700       0.345000
57774     57774     hunan          112.1667       27.4500          130       169     2012      03        13        073              0.062208       9.666260       0.226853       0.347214   -9999.000000   -9999.000000       0.059200       0.446000
57774     57774     hunan          112.1667       27.4500          130       169     2012      03        14        074              0.062083      10.262695       3.938089       0.345331       0.128500       0.305900       0.069600   -9999.000000
57774     57774     hunan          112.1667       27.4500          130       169     2012      03        15        075              0.064375      10.151093       0.979079       0.347838       0.111000   -9999.000000       0.060900       0.502000
57774     57774     hunan          112.1667       27.4500          130       169     2012      03        16        076              0.064042      11.825500       0.000000       0.349051       0.118500       0.205300   -9999.000000   -9999.000000
57774     57774     hunan          112.1667       27.4500          130       169     2012      03        17        077              0.064333      11.282440       0.307155       0.345132   -9999.000000       0.158400   -9999.000000       0.475000
57774     57774     hunan          112.1667       27.4500          130       169     2012      03        18        078              0.064000      11.884125       0.099008       0.343711   -9999.000000   -9999.000000       0.058700       0.508000
57774     57774     hunan          112.1667       27.4500          130       169     2012      03        19        079              0.064042      13.233246       1.291105       0.342737       0.125000       0.253300       0.073000   -9999.000000
57774     57774     hunan          112.1667       27.4500          130       169     2012      03        20        080              0.063875      12.039093       0.521325       0.342883       0.126500       0.251900       0.073600       0.358000
57774     57774     hunan          112.1667       27.4500          130       169     2012      03        21        081              0.063958       8.766327       0.187015       0.341627       0.108000       0.090000   -9999.000000   -9999.000000
57774     57774     hunan          112.1667       27.4500          130       169     2012      03        22        082              0.064750       9.741882      10.887912       0.340409       0.126000       0.207200   -9999.000000       0.589000
57774     57774     hunan          112.1667       27.4500          130       169     2012      03        23        083              0.066333       8.677002       0.206765       0.350165   -9999.000000   -9999.000000   -9999.000000   -9999.000000
57774     57774     hunan          112.1667       27.4500          130       169     2012      03        24        084              0.064958      11.546295       0.182699       0.347646   -9999.000000       0.176600   -9999.000000       0.241000
57774     57774     hunan          112.1667       27.4500          130       169     2012      03        25        085              0.000000      13.859467       0.234857       0.338180       0.089500       0.431300       0.064700       0.423000
57774     57774     hunan          112.1667       27.4500          130       169     2012      03        26        086              0.062375      15.411896       0.000000       0.334303       0.087500   -9999.000000       0.080600   -9999.000000
57774     57774     hunan          112.1667       27.4500          130       169     2012      03        27        087              0.060792      17.315674       0.000000       0.331749       0.080000       0.130500   -9999.000000       0.440000
57774     57774     hunan          112.1667       27.4500          130       169     2012      03        28        088              0.059375      18.790588      10.893514       0.330202   -9999.000000   -9999.000000   -9999.000000   -9999.000000
57774     57774     hunan          112.1667       27.4500          130       169     2012      03        29        089              0.065167      18.593842       8.701554       0.342589   -9999.000000       0.294800       0.087700       0.782000
57774     57774     hunan          112.1667       27.4500          130       169     2012      03        30        090              0.069000      16.680847      20.575851       0.355328       0.118500       0.279400       0.100400       0.902000
57774     57774     hunan          112.1667       27.4500          130       169     2012      03        31        091              0.065750      14.959442       0.000000       0.367474       0.068000   -9999.000000       0.099000   -9999.000000
57774     57774     hunan          112.1667       27.4500          130       169     2012      04        01        092              0.065000      16.719299       1.616227       0.344065       0.105500       0.175500       0.090100       0.452000
57774     57774     hunan          112.1667       27.4500          130       169     2012      04        02        093              0.064417      18.490692       0.000000       0.339232   -9999.000000   -9999.000000   -9999.000000   -9999.000000
57774     57774     hunan          112.1667       27.4500          130       169     2012      04        03        094              0.060500      21.488159       0.000000       0.336068   -9999.000000       0.081700   -9999.000000       0.292000
57774     57774     hunan          112.1667       27.4500          130       169     2012      04        04        095              0.057500      18.582092       0.256808       0.332451       0.123500       0.143100       0.075300       0.256000
57774     57774     hunan          112.1667       27.4500          130       169     2012      04        05        096              0.056667      15.256439       0.000000       0.335434       0.105500   -9999.000000       0.065700   -9999.000000
57774     57774     hunan          112.1667       27.4500          130       169     2012      04        06        097              0.055292      18.397583       0.328321       0.333842       0.109500       0.174400       0.074600       0.327000
57774     57774     hunan          112.1667       27.4500          130       169     2012      04        07        098              0.053958      16.953064       1.054915       0.335265   -9999.000000       0.154300   -9999.000000   -9999.000000
57774     57774     hunan          112.1667       27.4500          130       169     2012      04        08        099              0.053875      18.845947       0.723752       0.334168   -9999.000000       0.068300   -9999.000000       0.344000
57774     57774     hunan          112.1667       27.4500          130       169     2012      04        09        100              0.054917      18.197388       0.000000       0.335390       0.128000       0.261400   -9999.000000   -9999.000000
57774     57774     hunan          112.1667       27.4500          130       169     2012      04        10        101              0.055375      19.195160       3.003949       0.333515       0.110500   -9999.000000       0.061800       0.426000
57774     57774     hunan          112.1667       27.4500          130       169     2012      04        11        102              0.069958      21.220306      21.031992       0.336992       0.150000       0.156100       0.078300       0.516000
57774     57774     hunan          112.1667       27.4500          130       169     2012      04        12        103              0.075750      18.500397       6.513558       0.363981       0.121000   -9999.000000       0.065400   -9999.000000
57774     57774     hunan          112.1667       27.4500          130       169     2012      04        13        104              0.074042      17.777710       0.264941       0.352653   -9999.000000   -9999.000000   -9999.000000       0.406000
57774     57774     hunan          112.1667       27.4500          130       169     2012      04        14        105              0.072458      17.152100       1.207863       0.342552       0.164000       0.117100   -9999.000000   -9999.000000
57774     57774     hunan          112.1667       27.4500          130       169     2012      04        15        106              0.071958      16.084503       0.755288       0.340348       0.153000   -9999.000000       0.063800       0.469000
57774     57774     hunan          112.1667       27.4500          130       169     2012      04        16        107              0.072375      15.392487       0.703163       0.341483       0.124500       0.168200       0.115500       0.618000
57774     57774     hunan          112.1667       27.4500          130       169     2012      04        17        108              0.075500      17.701508       3.816223       0.338968       0.151000       0.221700       0.118200   -9999.000000
57774     57774     hunan          112.1667       27.4500          130       169     2012      04        18        109              0.074875      16.922302       0.533392       0.345510   -9999.000000   -9999.000000   -9999.000000       0.424000
57774     57774     hunan          112.1667       27.4500          130       169     2012      04        19        110              0.074167      18.984436       2.417129       0.338767   -9999.000000       0.293300   -9999.000000   -9999.000000
57774     57774     hunan          112.1667       27.4500          130       169     2012      04        20        111              0.078125      20.867859       1.599853       0.338306       0.175000   -9999.000000   -9999.000000       0.807000
57774     57774     hunan          112.1667       27.4500          130       169     2012      04        21        112              0.075458      18.340271       0.000000       0.342615       0.136500       0.162200       0.109800   -9999.000000
57774     57774     hunan          112.1667       27.4500          130       169     2012      04        22        113              0.072833      20.911194       0.000000       0.333491       0.138000       0.383500       0.116200       0.322000
57774     57774     hunan          112.1667       27.4500          130       169     2012      04        23        114              0.072292      22.671661       0.342432       0.328439   -9999.000000   -9999.000000       0.129800       0.484000
57774     57774     hunan          112.1667       27.4500          130       169     2012      04        24        115              0.080208      23.126953      19.926125       0.329825   -9999.000000       0.316700   -9999.000000   -9999.000000
57774     57774     hunan          112.1667       27.4500          130       169     2012      04        25        116              0.000000      24.690826       2.310938       0.358962       0.167000       0.565800   -9999.000000       0.602000
57774     57774     hunan          112.1667       27.4500          130       169     2012      04        26        117              0.079167      18.020844       0.000000       0.347423       0.148000       0.308100   -9999.000000   -9999.000000
57774     57774     hunan          112.1667       27.4500          130       169     2012      04        27        118              0.293208      21.592499       0.000000       0.335655       0.142000       0.292200       0.120900       0.299000
57774     57774     hunan          112.1667       27.4500          130       169     2012      04        28        119              0.418750      23.977936       1.177246       0.331368       0.144000   -9999.000000       0.153500       0.446000
57774     57774     hunan          112.1667       27.4500          130       169     2012      04        29        120              0.431292      24.009979       3.251221       0.331047   -9999.000000       0.274600       0.131300   -9999.000000
57774     57774     hunan          112.1667       27.4500          130       169     2012      04        30        121              0.455583      23.879089       1.858789       0.334803       0.204000       0.455500   -9999.000000       0.736000
57774     57774     hunan          112.1667       27.4500          130       169     2012      05        01        122              0.450958      22.876465      14.291933       0.337770       0.235000   -9999.000000   -9999.000000   -9999.000000
57774     57774     hunan          112.1667       27.4500          130       169     2012      05        02        123              0.445875      20.798126       0.762666       0.357276       0.217000       0.240800       0.114300       0.498000
57774     57774     hunan          112.1667       27.4500          130       169     2012      05        03        124              0.455542      21.732819       6.730952       0.340376       0.212000   -9999.000000       0.113700       0.720000
57774     57774     hunan          112.1667       27.4500          130       169     2012      05        04        125              0.454167      20.728943       0.000000       0.350070   -9999.000000       0.287700       0.105100   -9999.000000
57774     57774     hunan          112.1667       27.4500          130       169     2012      05        05        126              0.455167      21.709412       0.000000       0.339516       0.220000   -9999.000000   -9999.000000       0.500000
57774     57774     hunan          112.1667       27.4500          130       169     2012      05        06        127              0.447875      24.606445       0.000000       0.334617       0.194000   -9999.000000   -9999.000000   -9999.000000
57774     57774     hunan          112.1667       27.4500          130       169     2012      05        07        128              0.440500      26.292999       0.000000       0.331333   -9999.000000       0.236100   -9999.000000       0.474000
57774     57774     hunan          112.1667       27.4500          130       169     2012      05        08        129              0.424667      27.864594      13.296999       0.327117       0.176000   -9999.000000       0.162700   -9999.000000
57774     57774     hunan          112.1667       27.4500          130       169     2012      05        09        130              0.464625      27.835754      44.382530       0.348741   -9999.000000       0.303000       0.185600       0.772000
57774     57774     hunan          112.1667       27.4500          130       169     2012      05        10        131              0.455708      23.964478       0.000000       0.381177   -9999.000000       0.267100       0.168500       0.782000
57774     57774     hunan          112.1667       27.4500          130       169     2012      05        11        132              0.450042      24.351379       0.708692       0.351671       0.219000   -9999.000000   -9999.000000   -9999.000000
57774     57774     hunan          112.1667       27.4500          130       169     2012      05        12        133              0.475208      26.361969      27.676226       0.347029       0.224000       0.207000   -9999.000000       0.633000
57774     57774     hunan          112.1667       27.4500          130       169     2012      05        13        134              0.468583      23.000732       4.083913       0.392185       0.242500       0.422900       0.172900   -9999.000000
57774     57774     hunan          112.1667       27.4500          130       169     2012      05        14        135              0.483458      21.306824       7.203552       0.361534   -9999.000000       0.273200       0.195700       0.543000
57774     57774     hunan          112.1667       27.4500          130       169     2012      05        15        136              0.466542      19.024261       0.000000       0.366938   -9999.000000       0.230800       0.177200       0.605000
57774     57774     hunan          112.1667       27.4500          130       169     2012      05        16        137              0.465125      21.247742       0.000000       0.356559       0.214000   -9999.000000       0.171800   -9999.000000
57774     57774     hunan          112.1667       27.4500          130       169     2012      05        17        138              0.455292      23.995911       0.000000       0.350204       0.195000       0.310300   -9999.000000       0.353000
57774     57774     hunan          112.1667       27.4500          130       169     2012      05        18        139              0.446500      25.650085       8.181948       0.344449       0.186000       0.315000   -9999.000000   -9999.000000
57774     57774     hunan          112.1667       27.4500          130       169     2012      05        19        140              0.468708      27.310333       0.335550       0.348998       0.222000   -9999.000000       0.176000       0.541000
57774     57774     hunan          112.1667       27.4500          130       169     2012      05        20        141              0.460750      23.796692       0.000000       0.348431   -9999.000000       0.207600       0.177300   -9999.000000
57774     57774     hunan          112.1667       27.4500          130       169     2012      05        21        142              0.453042      25.254211       0.000000       0.339903       0.315000   -9999.000000       0.130700       0.282000
57774     57774     hunan          112.1667       27.4500          130       169     2012      05        22        143              0.461375      25.425507      22.274672       0.337678       0.407000       0.295900   -9999.000000       0.373000
57774     57774     hunan          112.1667       27.4500          130       169     2012      05        23        144              0.481625      21.992065       7.497767       0.359014   -9999.000000       0.328600   -9999.000000   -9999.000000
57774     57774     hunan          112.1667       27.4500          130       169     2012      05        24        145              0.482292      21.014404      10.910583       0.362111       0.406000   -9999.000000   -9999.000000       0.921000
57774     57774     hunan          112.1667       27.4500          130       169     2012      05        25        146              0.000000      20.196259      31.949083       0.359604   -9999.000000       0.221600       0.150100   -9999.000000
57774     57774     hunan          112.1667       27.4500          130       169     2012      05        26        147              0.487417      19.649628      10.151257       0.382660       0.354000   -9999.000000       0.149700       0.717000
57774     57774     hunan          112.1667       27.4500          130       169     2012      05        27        148              0.487750      20.647034       1.446229       0.411552       0.370500       0.386500       0.152200       0.666000
57774     57774     hunan          112.1667       27.4500          130       169     2012      05        28        149              0.490375      22.086182       0.365358       0.374750       0.320500       0.261700   -9999.000000   -9999.000000
57774     57774     hunan          112.1667       27.4500          130       169     2012      05        29        150              0.497375      23.412170      11.455317       0.360330       0.350000   -9999.000000   -9999.000000       0.906000
57774     57774     hunan          112.1667       27.4500          130       169     2012      05        30        151              0.494625      24.236755       0.000000       0.364152   -9999.000000       0.270800       0.132600   -9999.000000
57774     57774     hunan          112.1667       27.4500          130       169     2012      05        31        152              0.484375      24.182861       1.164788       0.354456   -9999.000000       0.251500       0.145700   -9999.000000
57774     57774     hunan          112.1667       27.4500          130       169     2012      06        01        153              0.497250      23.839081       9.087125       0.350316       0.363000       0.324100       0.150300       0.617000
57774     57774     hunan          112.1667       27.4500          130       169     2012      06        02        154              0.495125      21.400604       0.000000       0.358848       0.337500       0.297100       0.140300   -9999.000000
57774     57774     hunan          112.1667       27.4500          130       169     2012      06        03        155              0.504833      22.937439      23.653330       0.348933       0.437000   -9999.000000   -9999.000000       1.000000
57774     57774     hunan          112.1667       27.4500          130       169     2012      06        04        156              0.514500      22.219269       3.500715       0.369262   -9999.000000       0.319200   -9999.000000   -9999.000000
57774     57774     hunan          112.1667       27.4500          130       169     2012      06        05        157              0.499333      21.985535       0.283514       0.361236   -9999.000000       0.323600       0.088900       0.535000
57774     57774     hunan          112.1667       27.4500          130       169     2012      06        06        158              0.499833      23.454407       4.991333       0.354373       0.359000       0.515300       0.088900   -9999.000000
57774     57774     hunan          112.1667       27.4500          130       169     2012      06        07        159              0.508667      25.336975      10.667927       0.357504       0.332500       0.301600       0.065300       0.873000
57774     57774     hunan          112.1667       27.4500          130       169     2012      06        08        160              0.504583      25.524628       0.221437       0.361387       0.313500   -9999.000000   -9999.000000       0.717000
57774     57774     hunan          112.1667       27.4500          130       169     2012      06        09        161              0.507500      27.234222       1.824742       0.352545       0.279000       0.315600   -9999.000000   -9999.000000
57774     57774     hunan          112.1667       27.4500          130       169     2012      06        10        162              0.512667      29.199890      16.000277       0.349552   -9999.000000       0.628800   -9999.000000       0.788000
57774     57774     hunan          112.1667       27.4500          130       169     2012      06        11        163              0.000000      28.422546       4.148012       0.356903       0.256000   -9999.000000       0.100900   -9999.000000
57774     57774     hunan          112.1667       27.4500          130       169     2012      06        12        164              0.506208      25.721344       0.000000       0.360376       0.212000       0.219000       0.101000       0.512000
57774     57774     hunan          112.1667       27.4500          130       169     2012      06        13        165              0.499250      27.558411       0.442210       0.348054       0.205000   -9999.000000       0.093100       0.552000
57774     57774     hunan          112.1667       27.4500          130       169     2012      06        14        166              0.511083      28.646179       1.894045       0.343991       0.202000       0.291200   -9999.000000   -9999.000000
57774     57774     hunan          112.1667       27.4500          130       169     2012      06        15        167              0.504458      27.995178       0.000000       0.344123   -9999.000000       0.585200   -9999.000000       0.399000
57774     57774     hunan          112.1667       27.4500          130       169     2012      06        16        168              0.496958      28.145172       0.000000       0.339650   -9999.000000   -9999.000000       0.089100   -9999.000000
57774     57774     hunan          112.1667       27.4500          130       169     2012      06        17        169              0.490125      28.128265       0.000000       0.336714       0.215000       0.373700       0.096600       0.440000
57774     57774     hunan          112.1667       27.4500          130       169     2012      06        18        170              0.489750      27.793640       0.000000       0.334666       0.179500   -9999.000000       0.145900   -9999.000000
57774     57774     hunan          112.1667       27.4500          130       169     2012      06        19        171              0.482167      27.728699       0.000000       0.331707       0.192000       0.155500       0.127500       0.296000
57774     57774     hunan          112.1667       27.4500          130       169     2012      06        20        172              0.448208      28.019684       2.422364       0.328055   -9999.000000       0.241500   -9999.000000       0.442000
57774     57774     hunan          112.1667       27.4500          130       169     2012      06        21        173              0.433083      28.864410       3.430083       0.325549   -9999.000000   -9999.000000   -9999.000000   -9999.000000
57774     57774     hunan          112.1667       27.4500          130       169     2012      06        22        174              0.476500      29.177429       3.210056       0.328300       0.260500       0.238000       0.129200       0.448000
57774     57774     hunan          112.1667       27.4500          130       169     2012      06        23        175              0.493458      27.983307       1.561950       0.333640       0.257000       0.237400       0.137800   -9999.000000
57774     57774     hunan          112.1667       27.4500          130       169     2012      06        24        176              0.499167      26.501068       1.089103       0.333784       0.251000       0.182100       0.129500       0.389000
57774     57774     hunan          112.1667       27.4500          130       169     2012      06        25        177              0.501750      29.043854      11.675668       0.327038       0.264000       0.359500   -9999.000000       0.433000
57774     57774     hunan          112.1667       27.4500          130       169     2012      06        26        178              0.510042      28.577362       5.363787       0.341133   -9999.000000   -9999.000000   -9999.000000   -9999.000000
57774     57774     hunan          112.1667       27.4500          130       169     2012      06        27        179              0.512542      27.963867      19.312519       0.344345   -9999.000000       0.638900   -9999.000000       1.000000
57774     57774     hunan          112.1667       27.4500          130       169     2012      06        28        180              0.519583      28.017731       2.597700       0.359461       0.265000       0.670400       0.142000   -9999.000000
57774     57774     hunan          112.1667       27.4500          130       169     2012      06        29        181              0.508958      28.742859       2.029208       0.348455       0.234500   -9999.000000       0.138900       0.582000
57774     57774     hunan          112.1667       27.4500          130       169     2012      06        30        182              0.501917      30.564484       0.000000       0.335064       0.208000       0.317000       0.122200   -9999.000000
57774     57774     hunan          112.1667       27.4500          130       169     2012      07        01        183              0.494000      30.489197       0.000000       0.328616   -9999.000000   -9999.000000   -9999.000000   -9999.000000
57774     57774     hunan          112.1667       27.4500          130       169     2012      07        02        184              0.478917      30.071411       0.000000       0.322546       0.272000   -9999.000000   -9999.000000       0.194000
57774     57774     hunan          112.1667       27.4500          130       169     2012      07        03        185              0.456875      30.277313       0.000000       0.317885       0.233500       0.528800       0.154900   -9999.000000
57774     57774     hunan          112.1667       27.4500          130       169     2012      07        04        186              0.427000      30.474518       0.000000       0.314354       0.211000   -9999.000000       0.159400       0.326000
57774     57774     hunan          112.1667       27.4500          130       169     2012      07        05        187              0.399250      30.504852       6.347683       0.310996       0.205000       0.312200       0.161700   -9999.000000
57774     57774     hunan          112.1667       27.4500          130       169     2012      07        06        188              0.377375      31.003571       1.844051       0.308591   -9999.000000   -9999.000000       0.154700       0.310000
57774     57774     hunan          112.1667       27.4500          130       169     2012      07        07        189              0.358125      31.426239       1.936159       0.305992   -9999.000000       0.352900   -9999.000000       0.381000
57774     57774     hunan          112.1667       27.4500          130       169     2012      07        08        190              0.342917      30.862946       1.277004       0.303456       0.231000       0.129900   -9999.000000   -9999.000000
57774     57774     hunan          112.1667       27.4500          130       169     2012      07        09        191              0.331250      30.924133       2.481884       0.300893       0.215000   -9999.000000       0.150600       0.297000
57774     57774     hunan          112.1667       27.4500          130       169     2012      07        10        192              0.322833      31.160675       0.000000       0.299192       0.210000       0.248800       0.154500   -9999.000000
57774     57774     hunan          112.1667       27.4500          130       169     2012      07        11        193              0.317333      30.932648       0.364932       0.297230   -9999.000000       0.131400       0.148200       0.331000
57774     57774     hunan          112.1667       27.4500          130       169     2012      07        12        194              0.311750      31.576630       1.472793       0.294820   -9999.000000       0.295300   -9999.000000       0.336000
57774     57774     hunan          112.1667       27.4500          130       169     2012      07        13        195              0.306667      31.161072       1.745431       0.293348       0.244000       0.272900   -9999.000000   -9999.000000
57774     57774     hunan          112.1667       27.4500          130       169     2012      07        14        196              0.388750      30.356750      34.196320       0.293452       0.292000   -9999.000000   -9999.000000       0.653000
57774     57774     hunan          112.1667       27.4500          130       169     2012      07        15        197              0.434958      27.395142      14.127033       0.368232       0.264000       0.220600       0.126900   -9999.000000
57774     57774     hunan          112.1667       27.4500          130       169     2012      07        16        198              0.379625      27.917175      44.144245       0.350330   -9999.000000       0.337000       0.164600       1.000000
57774     57774     hunan          112.1667       27.4500          130       169     2012      07        17        199              0.379333      26.895477      23.842226       0.383074   -9999.000000   -9999.000000       0.193300   -9999.000000
57774     57774     hunan          112.1667       27.4500          130       169     2012      07        18        200              0.373458      26.739044      12.009157       0.379892   -9999.000000       0.209600   -9999.000000       0.814000
57774     57774     hunan          112.1667       27.4500          130       169     2012      07        19        201              0.370875      27.895660       0.219055       0.363308       0.261500   -9999.000000   -9999.000000       0.602000
57774     57774     hunan          112.1667       27.4500          130       169     2012      07        20        202              0.370167      28.950714       2.544185       0.352323       0.271000       0.270800       0.192100   -9999.000000
57774     57774     hunan          112.1667       27.4500          130       169     2012      07        21        203              0.369000      29.934021       0.000000       0.347208       0.198500       0.272400       0.182900       0.391000
57774     57774     hunan          112.1667       27.4500          130       169     2012      07        22        204              0.368375      31.228638       4.420705       0.340290   -9999.000000   -9999.000000       0.170800   -9999.000000
57774     57774     hunan          112.1667       27.4500          130       169     2012      07        23        205              0.371667      31.046021      13.128019       0.342638   -9999.000000       0.321500   -9999.000000       0.747000
57774     57774     hunan          112.1667       27.4500          130       169     2012      07        24        206              0.372417      29.196136       0.000000       0.356935       0.225000   -9999.000000   -9999.000000       0.470000
57774     57774     hunan          112.1667       27.4500          130       169     2012      07        25        207              0.370958      29.135498       2.201359       0.344663       0.206500       0.164300   -9999.000000   -9999.000000
57774     57774     hunan          112.1667       27.4500          130       169     2012      07        26        208              0.372333      30.201141       0.000000       0.337891       0.195000       0.234100       0.152200       0.407000
57774     57774     hunan          112.1667       27.4500          130       169     2012      07        27        209              0.371958      30.287720       1.855290       0.334315       0.180000   -9999.000000       0.163300   -9999.000000
57774     57774     hunan          112.1667       27.4500          130       169     2012      07        28        210              0.372667      30.413452       0.446572       0.335740   -9999.000000       0.320200       0.142600       0.311000
57774     57774     hunan          112.1667       27.4500          130       169     2012      07        29        211              0.371625      30.516205       0.000000       0.332567       0.215000       0.156300   -9999.000000       0.404000
57774     57774     hunan          112.1667       27.4500          130       169     2012      07        30        212              0.368292      31.275787       1.331190       0.327908       0.195500       0.205900   -9999.000000   -9999.000000
57774     57774     hunan          112.1667       27.4500          130       169     2012      07        31        213              0.363083      31.921387       3.386490       0.324510       0.179000       0.228100       0.179300       0.281000
57774     57774     hunan          112.1667       27.4500          130       169     2012      08        01        214              0.358583      31.367249       0.475470       0.321345       0.221000   -9999.000000       0.187900   -9999.000000
57774     57774     hunan          112.1667       27.4500          130       169     2012      08        02        215              0.355375      31.560242       1.884716       0.319135   -9999.000000       0.203300       0.184200       0.247000
57774     57774     hunan          112.1667       27.4500          130       169     2012      08        03        216              0.352833      30.200653       0.000000       0.316326   -9999.000000       0.402600       0.167900   -9999.000000
57774     57774     hunan          112.1667       27.4500          130       169     2012      08        04        217              0.371750      29.455383      32.622372       0.312437       0.267500   -9999.000000   -9999.000000       0.785000
57774     57774     hunan          112.1667       27.4500          130       169     2012      08        05        218              0.388542      26.928497       1.792548       0.365090       0.252000       0.234900   -9999.000000       0.603000
57774     57774     hunan          112.1667       27.4500          130       169     2012      08        06        219              0.387625      26.778473      18.012159       0.347362       0.216500   -9999.000000       0.145100   -9999.000000
57774     57774     hunan          112.1667       27.4500          130       169     2012      08        07        220              0.387042      28.814117       0.000000       0.374284       0.214000       0.209400       0.143000       0.338000
57774     57774     hunan          112.1667       27.4500          130       169     2012      08        08        221              0.394542      29.647278       0.000000       0.340792   -9999.000000       0.233500       0.134900   -9999.000000
57774     57774     hunan          112.1667       27.4500          130       169     2012      08        09        222              0.395083      29.359680       0.000000       0.331217       0.209000   -9999.000000   -9999.000000       0.363000
57774     57774     hunan          112.1667       27.4500          130       169     2012      08        10        223              0.404208      29.069641       0.089150       0.328250       0.217000       0.400700   -9999.000000       0.323000
57774     57774     hunan          112.1667       27.4500          130       169     2012      08        11        224              0.404292      30.099396       1.291593       0.324664       0.209500   -9999.000000   -9999.000000   -9999.000000
57774     57774     hunan          112.1667       27.4500          130       169     2012      08        12        225              0.398625      30.336121       3.116798       0.323468       0.201000       0.240200       0.134000       0.291000
57774     57774     hunan          112.1667       27.4500          130       169     2012      08        13        226              0.393958      29.536743       0.573086       0.330911   -9999.000000       0.329000       0.172500   -9999.000000
57774     57774     hunan          112.1667       27.4500          130       169     2012      08        14        227              0.389583      29.964386       1.986634       0.326765   -9999.000000   -9999.000000       0.168700       0.386000
57774     57774     hunan          112.1667       27.4500          130       169     2012      08        15        228              0.386167      29.533264       3.806766       0.328049       0.220500       0.292500   -9999.000000   -9999.000000
57774     57774     hunan          112.1667       27.4500          130       169     2012      08        16        229              0.381250      30.131775       0.000000       0.321715       0.195500       0.286400   -9999.000000       0.336000
57774     57774     hunan          112.1667       27.4500          130       169     2012      08        17        230              0.384000      30.850952       6.575757       0.317193       0.211000       0.224200       0.176000       0.275000
57774     57774     hunan          112.1667       27.4500          130       169     2012      08        18        231              0.384917      29.649506       0.280725       0.332362   -9999.000000       0.246200       0.171300   -9999.000000
57774     57774     hunan          112.1667       27.4500          130       169     2012      08        19        232              0.378583      31.026337       0.000000       0.321698   -9999.000000   -9999.000000       0.169900       0.374000
57774     57774     hunan          112.1667       27.4500          130       169     2012      08        20        233              0.371333      31.682098       0.000000       0.316080       0.225000       0.181500       0.158400   -9999.000000
57774     57774     hunan          112.1667       27.4500          130       169     2012      08        21        234              0.407167      31.667328      18.010752       0.312142       0.295000       0.402900   -9999.000000   -9999.000000
57774     57774     hunan          112.1667       27.4500          130       169     2012      08        22        235              0.422458      27.508026       0.699938       0.346255       0.310000   -9999.000000   -9999.000000   -9999.000000
57774     57774     hunan          112.1667       27.4500          130       169     2012      08        23        236              0.424833      24.394989       1.154332       0.338017       0.308000       0.168900       0.183000   -9999.000000
57774     57774     hunan          112.1667       27.4500          130       169     2012      08        24        237              0.421958      23.544342       0.000000       0.332468   -9999.000000   -9999.000000       0.172300       0.454000
57774     57774     hunan          112.1667       27.4500          130       169     2012      08        25        238              0.000000      25.499695       0.000000       0.327359       0.262000       0.241300       0.164400   -9999.000000
57774     57774     hunan          112.1667       27.4500          130       169     2012      08        26        239              0.414250      26.639496       0.000000       0.322678       0.255000       0.189200   -9999.000000       0.309000
57774     57774     hunan          112.1667       27.4500          130       169     2012      08        27        240              0.409917      28.041779       0.000000       0.318453       0.223500   -9999.000000   -9999.000000       0.347000
57774     57774     hunan          112.1667       27.4500          130       169     2012      08        28        241              0.405167      27.333008       0.000000       0.314812       0.245000       0.171900   -9999.000000   -9999.000000
57774     57774     hunan          112.1667       27.4500          130       169     2012      08        29        242              0.396208      28.234894       0.000000       0.312623   -9999.000000   -9999.000000       0.143900       0.260000
57774     57774     hunan          112.1667       27.4500          130       169     2012      08        30        243              0.385500      29.549377       0.426410       0.309917   -9999.000000       0.246900       0.148000   -9999.000000
57774     57774     hunan          112.1667       27.4500          130       169     2012      08        31        244              0.377208      29.773285       0.000000       0.308056       0.248500       0.200800       0.139300       0.295000
57774     57774     hunan          112.1667       27.4500          130       169     2012      09        01        245              0.370833      30.283569       0.000000       0.305599       0.219500   -9999.000000   -9999.000000   -9999.000000
57774     57774     hunan          112.1667       27.4500          130       169     2012      09        02        246              0.366458      30.834564      12.184338       0.302865       0.270000       0.282700   -9999.000000       0.328000
57774     57774     hunan          112.1667       27.4500          130       169     2012      09        03        247              0.366625      27.862823       0.567167       0.341164       0.265000       0.201200       0.144700       0.505000
57774     57774     hunan          112.1667       27.4500          130       169     2012      09        04        248              0.367458      24.804413       0.000000       0.324789   -9999.000000       0.196300       0.143100   -9999.000000
57774     57774     hunan          112.1667       27.4500          130       169     2012      09        05        249              0.364542      26.456024       0.000000       0.314669       0.239000       0.190600       0.151300       0.189000
57774     57774     hunan          112.1667       27.4500          130       169     2012      09        06        250              0.362000      26.584717       0.000000       0.309947       0.237000   -9999.000000       0.138400   -9999.000000
57774     57774     hunan          112.1667       27.4500          130       169     2012      09        07        251              0.359708      28.026642       0.000000       0.306971       0.236000       0.234900   -9999.000000       0.366000
57774     57774     hunan          112.1667       27.4500          130       169     2012      09        08        252              0.357750      29.227509       0.000000       0.304835       0.223000       0.497200   -9999.000000       0.353000
57774     57774     hunan          112.1667       27.4500          130       169     2012      09        09        253              0.355667      29.273010       9.711564       0.301518   -9999.000000   -9999.000000       0.151300   -9999.000000
57774     57774     hunan          112.1667       27.4500          130       169     2012      09        10        254              0.355333      25.902649       0.558693       0.311991   -9999.000000       0.218500       0.145200       0.271000
57774     57774     hunan          112.1667       27.4500          130       169     2012      09        11        255              0.355292      26.175201       1.696168       0.327870       0.198500   -9999.000000       0.134800   -9999.000000
57774     57774     hunan          112.1667       27.4500          130       169     2012      09        12        256              0.354792      28.511139       8.344185       0.317102       0.160000       0.186700   -9999.000000       0.464000
57774     57774     hunan          112.1667       27.4500          130       169     2012      09        13        257              0.359625      24.549377       0.307544       0.323694       0.205500       0.266900   -9999.000000   -9999.000000
57774     57774     hunan          112.1667       27.4500          130       169     2012      09        14        258              0.365000      21.196777       0.000000       0.328705   -9999.000000   -9999.000000   -9999.000000       0.229000
57774     57774     hunan          112.1667       27.4500          130       169     2012      09        15        259              0.362875      22.062958       0.000000       0.317712   -9999.000000       0.211200       0.135600       0.298000
57774     57774     hunan          112.1667       27.4500          130       169     2012      09        16        260              0.359042      22.485626       0.000000       0.311650       0.222000   -9999.000000       0.140100   -9999.000000
57774     57774     hunan          112.1667       27.4500          130       169     2012      09        17        261              0.356458      22.096954       0.000000       0.309970       0.196500       0.220900       0.124500       0.309000
57774     57774     hunan          112.1667       27.4500          130       169     2012      09        18        262              0.356250      22.049866       0.000000       0.308816       0.194500       0.244200   -9999.000000   -9999.000000
57774     57774     hunan          112.1667       27.4500          130       169     2012      09        19        263              0.353583      23.353882       0.000000       0.305573       0.194000   -9999.000000   -9999.000000       0.307000
57774     57774     hunan          112.1667       27.4500          130       169     2012      09        20        264              0.361375      24.414459      24.329731       0.302545   -9999.000000       0.226400       0.148700       0.296000
57774     57774     hunan          112.1667       27.4500          130       169     2012      09        21        265              0.401167      23.613007      33.071148       0.334422   -9999.000000       0.389600       0.158800   -9999.000000
57774     57774     hunan          112.1667       27.4500          130       169     2012      09        22        266              0.405125      22.895294      10.636075       0.375809       0.251500   -9999.000000       0.147300       1.000000
57774     57774     hunan          112.1667       27.4500          130       169     2012      09        23        267              0.406458      22.533569      12.758263       0.362153       0.301000       0.419100   -9999.000000   -9999.000000
57774     57774     hunan          112.1667       27.4500          130       169     2012      09        24        268              0.407250      22.629333       2.817513       0.362530       0.257000   -9999.000000   -9999.000000       0.654000
57774     57774     hunan          112.1667       27.4500          130       169     2012      09        25        269              0.404250      22.746735       0.000000       0.350971   -9999.000000       0.378100   -9999.000000       0.669000
57774     57774     hunan          112.1667       27.4500          130       169     2012      09        26        270              0.403333      24.006439       0.000000       0.338654   -9999.000000   -9999.000000       0.143200   -9999.000000
57774     57774     hunan          112.1667       27.4500          130       169     2012      09        27        271              0.401000      24.595642       0.000000       0.332139       0.215500   -9999.000000       0.135600       0.514000
57774     57774     hunan          112.1667       27.4500          130       169     2012      09        28        272              0.398800      23.398468       0.000000       0.329016       0.198000   -9999.000000       0.135200   -9999.000000
57774     57774     hunan          112.1667       27.4500          130       169     2012      09        29        273              0.398208      22.160919       0.000000       0.322514       0.199000   -9999.000000   -9999.000000       0.269000
57774     57774     hunan          112.1667       27.4500          130       169     2012      09        30        274              0.394167      20.950104       0.000000       0.319603       0.201000       0.197900   -9999.000000   -9999.000000
57774     57774     hunan          112.1667       27.4500          130       169     2012      10        01        275              0.387708      21.115662       0.000000       0.318278   -9999.000000       0.394400   -9999.000000       0.347000
57774     57774     hunan          112.1667       27.4500          130       169     2012      10        02        276              0.383417      21.909393       0.000000       0.316795       0.154000   -9999.000000       0.117300       0.456000
57774     57774     hunan          112.1667       27.4500          130       169     2012      10        03        277              0.381375      22.737335       0.357513       0.315593       0.159500       0.167600       0.123200   -9999.000000
57774     57774     hunan          112.1667       27.4500          130       169     2012      10        04        278              0.380000      21.168640       0.406525       0.317900       0.176000   -9999.000000       0.119100       0.437000
57774     57774     hunan          112.1667       27.4500          130       169     2012      10        05        279              0.378000      19.912384       0.198336       0.320363       0.183000       0.126500   -9999.000000   -9999.000000
57774     57774     hunan          112.1667       27.4500          130       169     2012      10        06        280              0.376583      19.229431       0.000000       0.320897   -9999.000000       0.182100   -9999.000000       0.411000
57774     57774     hunan          112.1667       27.4500          130       169     2012      10        07        281              0.375750      19.560394       0.000000       0.321555   -9999.000000   -9999.000000       0.119800       0.362000
57774     57774     hunan          112.1667       27.4500          130       169     2012      10        08        282              0.374750      21.269379       0.000000       0.320264       0.166500       0.291600       0.099300   -9999.000000
57774     57774     hunan          112.1667       27.4500          130       169     2012      10        09        283              0.375167      21.295441       0.000000       0.318402       0.147500   -9999.000000       0.094400       0.264000
57774     57774     hunan          112.1667       27.4500          130       169     2012      10        10        284              0.372667      19.942505       0.000000       0.319108       0.152000       0.100900   -9999.000000   -9999.000000
57774     57774     hunan          112.1667       27.4500          130       169     2012      10        11        285              0.369667      21.294952       0.000000       0.316008   -9999.000000       0.361900   -9999.000000       0.351000
57774     57774     hunan          112.1667       27.4500          130       169     2012      10        12        286              0.367708      21.628845       0.000000       0.314196   -9999.000000   -9999.000000   -9999.000000   -9999.000000
57774     57774     hunan          112.1667       27.4500          130       169     2012      10        13        287              0.367458      21.793427       0.000000       0.312973       0.151000       0.234000       0.095500       0.263000
57774     57774     hunan          112.1667       27.4500          130       169     2012      10        14        288              0.367292      20.648712       0.000000       0.312161       0.143500   -9999.000000       0.096400       0.262000
57774     57774     hunan          112.1667       27.4500          130       169     2012      10        15        289              0.364625      19.908997       0.000000       0.313374       0.133000   -9999.000000       0.135300   -9999.000000
57774     57774     hunan          112.1667       27.4500          130       169     2012      10        16        290              0.364958      21.697357       4.921146       0.313278   -9999.000000       0.085800   -9999.000000       0.726000
57774     57774     hunan          112.1667       27.4500          130       169     2012      10        17        291              0.364708      19.364899       0.000000       0.326276   -9999.000000   -9999.000000   -9999.000000   -9999.000000
57774     57774     hunan          112.1667       27.4500          130       169     2012      10        18        292              0.365000      17.965210       0.000000       0.317642       0.139000       0.174000       0.136200       0.323000
57774     57774     hunan          112.1667       27.4500          130       169     2012      10        19        293              0.363583      18.962311       0.000000       0.314951       0.134500   -9999.000000       0.140200       0.269000
57774     57774     hunan          112.1667       27.4500          130       169     2012      10        20        294              0.363917      20.228210       0.760759       0.315160       0.119000   -9999.000000       0.140800   -9999.000000
57774     57774     hunan          112.1667       27.4500          130       169     2012      10        21        295              0.363667      23.257996       4.101429       0.313545       0.176000       0.269800       0.136500       0.512000
57774     57774     hunan          112.1667       27.4500          130       169     2012      10        22        296              0.363625      23.803192       2.038709       0.317869   -9999.000000   -9999.000000   -9999.000000   -9999.000000
57774     57774     hunan          112.1667       27.4500          130       169     2012      10        23        297              0.363583      17.863129       0.204487       0.327704   -9999.000000       0.182000   -9999.000000       0.350000
57774     57774     hunan          112.1667       27.4500          130       169     2012      10        24        298              0.364500      17.587494       0.000000       0.320152   -9999.000000       0.386300       0.104400       0.363000
57774     57774     hunan          112.1667       27.4500          130       169     2012      10        25        299              0.000000      18.091125       0.402558       0.317225       0.182500   -9999.000000       0.106300   -9999.000000
57774     57774     hunan          112.1667       27.4500          130       169     2012      10        26        300              0.363250      19.613983       0.276685       0.315252       0.176000       0.248100       0.106500       0.299000
57774     57774     hunan          112.1667       27.4500          130       169     2012      10        27        301              0.362583      20.559875       0.207711       0.313605       0.178000       0.162700   -9999.000000   -9999.000000
57774     57774     hunan          112.1667       27.4500          130       169     2012      10        28        302              0.000000      20.528503       1.858018       0.311800   -9999.000000       0.135400   -9999.000000       0.276000
57774     57774     hunan          112.1667       27.4500          130       169     2012      10        29        303              0.380625      19.269867      22.638340       0.316567       0.217000       0.167800   -9999.000000   -9999.000000
57774     57774     hunan          112.1667       27.4500          130       169     2012      10        30        304              0.399250      18.702789       0.000000       0.357258       0.192500   -9999.000000       0.137200       0.434000
57774     57774     hunan          112.1667       27.4500          130       169     2012      10        31        305              0.397292      17.312805       0.000000       0.337763       0.174500       0.306800       0.141400       0.540000
57774     57774     hunan          112.1667       27.4500          130       169     2012      11        01        306              0.394792      17.231537       0.000000       0.329074       0.145000       0.258900       0.140800   -9999.000000
57774     57774     hunan          112.1667       27.4500          130       169     2012      11        02        307              0.393625      16.480072       0.250015       0.325240   -9999.000000   -9999.000000   -9999.000000       0.280000
57774     57774     hunan          112.1667       27.4500          130       169     2012      11        03        308              0.394708      17.564209       3.981750       0.321799   -9999.000000       0.290400   -9999.000000   -9999.000000
57774     57774     hunan          112.1667       27.4500          130       169     2012      11        04        309              0.395625      15.184296       0.085807       0.331805       0.157500   -9999.000000       0.133500       0.426000
57774     57774     hunan          112.1667       27.4500          130       169     2012      11        05        310              0.394583      16.029358       1.125731       0.323857       0.159000       0.309500       0.100900       0.416000
57774     57774     hunan          112.1667       27.4500          130       169     2012      11        06        311              0.393750      15.468811       3.671707       0.323483       0.159000       0.421300       0.097900   -9999.000000
57774     57774     hunan          112.1667       27.4500          130       169     2012      11        07        312              0.411000      15.233215      35.571117       0.326310   -9999.000000   -9999.000000       0.106200       0.736000
57774     57774     hunan          112.1667       27.4500          130       169     2012      11        08        313              0.410636      13.747925      15.172004       0.366001   -9999.000000       0.257900   -9999.000000   -9999.000000
57774     57774     hunan          112.1667       27.4500          130       169     2012      11        09        314              0.407750      12.926086      12.023285       0.369985   -9999.000000   -9999.000000   -9999.000000       0.933000
57774     57774     hunan          112.1667       27.4500          130       169     2012      11        10        315              0.408250      13.023804       0.121557       0.362011       0.202000       0.191700       0.104800   -9999.000000
57774     57774     hunan          112.1667       27.4500          130       169     2012      11        11        316              0.405583      12.877563       0.000000       0.349739       0.145000       0.280800       0.108700       0.336000
57774     57774     hunan          112.1667       27.4500          130       169     2012      11        12        317              0.403750      13.628815       0.000000       0.339020       0.148000   -9999.000000       0.138900       0.549000
57774     57774     hunan          112.1667       27.4500          130       169     2012      11        13        318              0.000000      13.648804       0.000000       0.335434   -9999.000000       0.260500   -9999.000000   -9999.000000
57774     57774     hunan          112.1667       27.4500          130       169     2012      11        14        319              0.402292      15.225372       5.341203       0.332892       0.190000   -9999.000000   -9999.000000       0.556000
57774     57774     hunan          112.1667       27.4500          130       169     2012      11        15        320              0.412083      14.709625      19.647205       0.337370       0.204000       0.150200   -9999.000000   -9999.000000
57774     57774     hunan          112.1667       27.4500          130       169     2012      11        16        321              0.413250      12.631683      20.570131       0.361971   -9999.000000       0.276200       0.146400       0.775000
57774     57774     hunan          112.1667       27.4500          130       169     2012      11        17        322              0.000000      10.393188       0.000000       0.370288       0.144000   -9999.000000       0.143100       0.524000
57774     57774     hunan          112.1667       27.4500          130       169     2012      11        18        323              0.406250      11.107086       0.000000       0.348426   -9999.000000       0.334100       0.136500   -9999.000000
57774     57774     hunan          112.1667       27.4500          130       169     2012      11        19        324              0.405167      11.950745       0.000000       0.344466   -9999.000000       0.167400   -9999.000000       0.500000
57774     57774     hunan          112.1667       27.4500          130       169     2012      11        20        325              0.405000      13.128265       0.567379       0.342892       0.181000       0.550600   -9999.000000   -9999.000000
57774     57774     hunan          112.1667       27.4500          130       169     2012      11        21        326              0.405000      12.726593       0.821975       0.342841       0.164000       0.362000       0.105500       0.494000
57774     57774     hunan          112.1667       27.4500          130       169     2012      11        22        327              0.406083      12.007629       4.960444       0.344052       0.171500   -9999.000000       0.103300       0.560000
57774     57774     hunan          112.1667       27.4500          130       169     2012      11        23        328              0.407375      11.480042       0.000000       0.349923       0.162000       0.267600       0.098200   -9999.000000
57774     57774     hunan          112.1667       27.4500          130       169     2012      11        24        329              0.406625      10.209381       0.156919       0.344557   -9999.000000       0.418100   -9999.000000       0.383000
57774     57774     hunan          112.1667       27.4500          130       169     2012      11        25        330              0.407500      10.677979       0.430835       0.342689   -9999.000000   -9999.000000   -9999.000000   -9999.000000
57774     57774     hunan          112.1667       27.4500          130       169     2012      11        26        331              0.406708       9.711029       0.350185       0.342849       0.139000       0.239900   -9999.000000       0.290000
57774     57774     hunan          112.1667       27.4500          130       169     2012      11        27        332              0.406667      10.015137       4.422819       0.340127       0.164000   -9999.000000       0.098700   -9999.000000
57774     57774     hunan          112.1667       27.4500          130       169     2012      11        28        333              0.409875       9.490417       0.000000       0.344438       0.153000       0.221100       0.098000       0.490000
57774     57774     hunan          112.1667       27.4500          130       169     2012      11        29        334              0.409125      10.645905       3.002235       0.344586   -9999.000000       0.272400       0.095900       0.496000
57774     57774     hunan          112.1667       27.4500          130       169     2012      11        30        335              0.413167       9.582550      13.493688       0.344933   -9999.000000   -9999.000000   -9999.000000   -9999.000000
57774     57774     hunan          112.1667       27.4500          130       169     2012      12        01        336              0.412833       8.936218       1.509608       0.355830       0.173000       0.445900   -9999.000000       0.490000
57774     57774     hunan          112.1667       27.4500          130       169     2012      12        02        337              0.409792       8.876404       0.000000       0.353687   -9999.000000   -9999.000000       0.096100   -9999.000000
57774     57774     hunan          112.1667       27.4500          130       169     2012      12        03        338              0.408458       8.457733       0.000000       0.345568       0.130000       0.165800       0.086500       0.395000
57774     57774     hunan          112.1667       27.4500          130       169     2012      12        04        339              0.407000       9.344666       0.406633       0.343276   -9999.000000       0.144700       0.087200       0.437000
57774     57774     hunan          112.1667       27.4500          130       169     2012      12        05        340              0.406625       9.074951       0.760433       0.343394   -9999.000000   -9999.000000       0.085000   -9999.000000
57774     57774     hunan          112.1667       27.4500          130       169     2012      12        06        341              0.405783       9.447937       0.897171       0.341662   -9999.000000       0.245100   -9999.000000       0.249000
57774     57774     hunan          112.1667       27.4500          130       169     2012      12        07        342              0.404958      10.500214       0.000000       0.340671       0.142500       0.173500   -9999.000000   -9999.000000
57774     57774     hunan          112.1667       27.4500          130       169     2012      12        08        343              0.403625      11.121429       0.000000       0.340279       0.135500       0.260100       0.080500       0.397000
57774     57774     hunan          112.1667       27.4500          130       169     2012      12        09        344              0.404375      11.055511      10.378494       0.339326       0.149000       0.226000       0.092100   -9999.000000
57774     57774     hunan          112.1667       27.4500          130       169     2012      12        10        345              0.413625       8.649292      10.361163       0.350012   -9999.000000   -9999.000000       0.080300       0.682000
57774     57774     hunan          112.1667       27.4500          130       169     2012      12        11        346              0.409583       6.778168       0.000000       0.361463   -9999.000000       0.248100   -9999.000000       0.470000
57774     57774     hunan          112.1667       27.4500          130       169     2012      12        12        347              0.409500       6.989136       2.022813       0.347316       0.187000       0.231500   -9999.000000   -9999.000000
57774     57774     hunan          112.1667       27.4500          130       169     2012      12        13        348              0.409208       7.051605       0.000000       0.348176       0.153500   -9999.000000   -9999.000000       0.565000
57774     57774     hunan          112.1667       27.4500          130       169     2012      12        14        349              0.408583       8.739532       0.000000       0.344920       0.170500       0.289300       0.081200   -9999.000000
57774     57774     hunan          112.1667       27.4500          130       169     2012      12        15        350              0.000000       7.812286       0.000000       0.343717   -9999.000000   -9999.000000       0.080800       0.464000
57774     57774     hunan          112.1667       27.4500          130       169     2012      12        16        351              0.407000       6.776001       0.697186       0.343157   -9999.000000       0.380900       0.076200       0.420000
57774     57774     hunan          112.1667       27.4500          130       169     2012      12        17        352              0.413458       7.179596       9.264915       0.343193   -9999.000000       0.417300   -9999.000000   -9999.000000
57774     57774     hunan          112.1667       27.4500          130       169     2012      12        18        353              0.410750       6.243652       0.000000       0.356011   -9999.000000   -9999.000000   -9999.000000       0.519000
57774     57774     hunan          112.1667       27.4500          130       169     2012      12        19        354              0.411500       5.057037       5.103087       0.346866       0.203000       0.304200       0.086400   -9999.000000
57774     57774     hunan          112.1667       27.4500          130       169     2012      12        20        355              0.000000       5.241791       7.277025       0.350278       0.197000   -9999.000000       0.086900       0.671000
57774     57774     hunan          112.1667       27.4500          130       169     2012      12        21        356              0.412167       4.610168       0.324219       0.355595   -9999.000000       0.285500       0.082700       0.426000
57774     57774     hunan          112.1667       27.4500          130       169     2012      12        22        357              0.409583       4.257294       0.000000       0.350454   -9999.000000       0.245700       0.077400   -9999.000000
57774     57774     hunan          112.1667       27.4500          130       169     2012      12        23        358              0.408042       4.667358       0.000000       0.345853   -9999.000000   -9999.000000   -9999.000000       0.266000
57774     57774     hunan          112.1667       27.4500          130       169     2012      12        24        359              0.407158       4.439331       0.848005       0.341658       0.121000       0.292700   -9999.000000   -9999.000000
57774     57774     hunan          112.1667       27.4500          130       169     2012      12        25        360              0.407000       5.689392       0.330733       0.342752       0.137000       0.198600       0.099400       0.271000
57774     57774     hunan          112.1667       27.4500          130       169     2012      12        26        361              0.000000       4.258698      22.004116       0.343515   -9999.000000       0.339700       0.114500   -9999.000000
57774     57774     hunan          112.1667       27.4500          130       169     2012      12        27        362              0.414417       2.334961       3.033845       0.350498   -9999.000000   -9999.000000       0.101600       0.597000
57774     57774     hunan          112.1667       27.4500          130       169     2012      12        28        363              0.411000       3.314667      11.774030       0.351415   -9999.000000   -9999.000000   -9999.000000       0.675000
57774     57774     hunan          112.1667       27.4500          130       169     2012      12        29        364              0.000000       3.358459       5.917795       0.358721   -9999.000000   -9999.000000   -9999.000000   -9999.000000
57774     57774     hunan          112.1667       27.4500          130       169     2012      12        30        365              0.000000       3.334503       0.788478       0.361209   -9999.000000       0.232900   -9999.000000       0.282000
57774     57774     hunan          112.1667       27.4500          130       169     2012      12        31        366              0.410200       2.341827       0.634947       0.358545   -9999.000000   -9999.000000       0.087400   -9999.000000
