# Supplementary material for: Research on Fusing Multisatellite Soil Moisture Data Based on Bayesian Model Averaging
Source: Hindawi journal article supplement (doi:10.1155/2018/9310838), 2018-06-25
Supplement: f1 [file 9310838.f1.zip › 2012_sm00-10cm_daily_ZDB_ZHY_57777_366days_allin.txt]

57777     57777     hunan          112.8667       27.2331          131       171     2012      01        01        001              0.000000   -9999.000000       0.000000   -9999.000000       0.123500   -9999.000000       0.069700   -9999.000000
57777     57777     hunan          112.8667       27.2331          131       171     2012      01        02        002              0.000000       3.865234       6.909089       0.327548       0.139000       0.204000   -9999.000000       0.402000
57777     57777     hunan          112.8667       27.2331          131       171     2012      01        03        003              0.000000       3.580078       5.277336       0.329030   -9999.000000       0.195000   -9999.000000       0.447000
57777     57777     hunan          112.8667       27.2331          131       171     2012      01        04        004              0.000000       1.670990       1.427695       0.320694   -9999.000000       0.445000   -9999.000000   -9999.000000
57777     57777     hunan          112.8667       27.2331          131       171     2012      01        05        005              0.000000       2.710602       4.028631       0.316002   -9999.000000   -9999.000000       0.063900       0.491000
57777     57777     hunan          112.8667       27.2331          131       171     2012      01        06        006              0.000000       1.803131       0.789145       0.315559   -9999.000000   -9999.000000       0.070800   -9999.000000
57777     57777     hunan          112.8667       27.2331          131       171     2012      01        07        007              0.000000       2.281555       0.000000       0.314559   -9999.000000       0.613100       0.067200       0.141000
57777     57777     hunan          112.8667       27.2331          131       171     2012      01        08        008              0.000000       2.553406       0.000000       0.311816       0.127000   -9999.000000   -9999.000000       0.349000
57777     57777     hunan          112.8667       27.2331          131       171     2012      01        09        009              0.000000       2.982910       0.000000       0.310740   -9999.000000   -9999.000000   -9999.000000   -9999.000000
57777     57777     hunan          112.8667       27.2331          131       171     2012      01        10        010              0.000000       3.455933       0.000000       0.311463   -9999.000000       0.121300       0.064400       0.261000
57777     57777     hunan          112.8667       27.2331          131       171     2012      01        11        011              0.000000       4.135651       0.118018       0.310955       0.125000   -9999.000000       0.062000   -9999.000000
57777     57777     hunan          112.8667       27.2331          131       171     2012      01        12        012              0.000000       3.752228       1.283720       0.310292       0.120500       0.245800       0.064600       0.152000
57777     57777     hunan          112.8667       27.2331          131       171     2012      01        13        013              0.000000       4.207001       4.524712       0.311431       0.130500       0.101900       0.061000   -9999.000000
57777     57777     hunan          112.8667       27.2331          131       171     2012      01        14        014              0.000000       3.737000      20.165579       0.314645   -9999.000000   -9999.000000   -9999.000000       0.556000
57777     57777     hunan          112.8667       27.2331          131       171     2012      01        15        015              0.000000       2.958771      20.628284       0.332002   -9999.000000   -9999.000000   -9999.000000       0.747000
57777     57777     hunan          112.8667       27.2331          131       171     2012      01        16        016              0.000000       2.535797       0.127850       0.332141   -9999.000000   -9999.000000       0.067400   -9999.000000
57777     57777     hunan          112.8667       27.2331          131       171     2012      01        17        017              0.000000       2.515594      10.386351       0.328404   -9999.000000   -9999.000000       0.079500       0.463000
57777     57777     hunan          112.8667       27.2331          131       171     2012      01        18        018              0.000000       3.243073       7.539235       0.331928   -9999.000000   -9999.000000       0.070500   -9999.000000
57777     57777     hunan          112.8667       27.2331          131       171     2012      01        19        019              0.000000       2.905548       1.508883       0.333833   -9999.000000   -9999.000000   -9999.000000       0.453000
57777     57777     hunan          112.8667       27.2331          131       171     2012      01        20        020              0.000000       2.796844       7.196029       0.328473   -9999.000000       0.332700   -9999.000000       0.619000
57777     57777     hunan          112.8667       27.2331          131       171     2012      01        21        021              0.000000       2.741882       2.016776       0.329975   -9999.000000   -9999.000000   -9999.000000   -9999.000000
57777     57777     hunan          112.8667       27.2331          131       171     2012      01        22        022              0.000000       1.668030       0.000000       0.312730   -9999.000000   -9999.000000       0.063800       0.044000
57777     57777     hunan          112.8667       27.2331          131       171     2012      01        23        023              0.000000       0.835327       0.929699       0.273339   -9999.000000       0.093900       0.072800   -9999.000000
57777     57777     hunan          112.8667       27.2331          131       171     2012      01        24        024              0.000000       0.775024       0.108257       0.263730   -9999.000000   -9999.000000   -9999.000000       0.067000
57777     57777     hunan          112.8667       27.2331          131       171     2012      01        25        025              0.000000       0.610992       6.704855       0.247117   -9999.000000       0.400500   -9999.000000       0.254000
57777     57777     hunan          112.8667       27.2331          131       171     2012      01        26        026              0.000000       1.900238       2.079691       0.290981   -9999.000000       0.208100   -9999.000000   -9999.000000
57777     57777     hunan          112.8667       27.2331          131       171     2012      01        27        027              0.000000       1.458038       2.218670       0.294624   -9999.000000   -9999.000000       0.073000       0.359000
57777     57777     hunan          112.8667       27.2331          131       171     2012      01        28        028              0.000000       1.876648       0.403934       0.303066   -9999.000000       0.289300       0.066800   -9999.000000
57777     57777     hunan          112.8667       27.2331          131       171     2012      01        29        029              0.000000       2.412384       0.306927       0.307484   -9999.000000   -9999.000000       0.072800       0.257000
57777     57777     hunan          112.8667       27.2331          131       171     2012      01        30        030              0.000000       4.025940       0.000000       0.312056   -9999.000000       0.291300       0.072800   -9999.000000
57777     57777     hunan          112.8667       27.2331          131       171     2012      01        31        031              0.000000       2.911285       0.000000       0.309138   -9999.000000       0.182400   -9999.000000       0.105000
57777     57777     hunan          112.8667       27.2331          131       171     2012      02        01        032              0.000000       5.686676       1.230923       0.310340       0.149000   -9999.000000   -9999.000000       0.179000
57777     57777     hunan          112.8667       27.2331          131       171     2012      02        02        033              0.000000       4.404053       1.066401       0.311329   -9999.000000       0.230500       0.075600   -9999.000000
57777     57777     hunan          112.8667       27.2331          131       171     2012      02        03        034              0.000000       1.591309       2.025512       0.303172   -9999.000000   -9999.000000       0.084300       0.279000
57777     57777     hunan          112.8667       27.2331          131       171     2012      02        04        035              0.000000       3.006989       0.255649       0.310439   -9999.000000       0.220500       0.079000   -9999.000000
57777     57777     hunan          112.8667       27.2331          131       171     2012      02        05        036              0.000000       3.729584      18.036688       0.311118   -9999.000000   -9999.000000   -9999.000000       0.576000
57777     57777     hunan          112.8667       27.2331          131       171     2012      02        06        037              0.000000       4.726013      31.949766       0.327182       0.176000   -9999.000000   -9999.000000       0.494000
57777     57777     hunan          112.8667       27.2331          131       171     2012      02        07        038              0.000000       3.671844       0.854714       0.351516   -9999.000000       0.326800   -9999.000000   -9999.000000
57777     57777     hunan          112.8667       27.2331          131       171     2012      02        08        039              0.000000       3.023224       0.484522       0.341948   -9999.000000   -9999.000000       0.070200       0.213000
57777     57777     hunan          112.8667       27.2331          131       171     2012      02        09        040              0.000000       2.353455       0.523446       0.319530   -9999.000000       0.172300       0.071300   -9999.000000
57777     57777     hunan          112.8667       27.2331          131       171     2012      02        10        041              0.000000       1.864410       0.344990       0.304588   -9999.000000       0.224700       0.062000       0.180000
57777     57777     hunan          112.8667       27.2331          131       171     2012      02        11        042              0.000000       2.121338       0.000000       0.298695       0.162000   -9999.000000   -9999.000000   -9999.000000
57777     57777     hunan          112.8667       27.2331          131       171     2012      02        12        043              0.000000       3.650787       1.970842       0.309721       0.163000       0.405900   -9999.000000       0.394000
57777     57777     hunan          112.8667       27.2331          131       171     2012      02        13        044              0.000000       4.083588       0.986295       0.315961       0.159000   -9999.000000   -9999.000000       0.288000
57777     57777     hunan          112.8667       27.2331          131       171     2012      02        14        045              0.000000       4.722290       0.000000       0.314440       0.142000   -9999.000000       0.079000   -9999.000000
57777     57777     hunan          112.8667       27.2331          131       171     2012      02        15        046              0.000000       4.666687       0.448447       0.312299   -9999.000000       0.190600       0.079200       0.345000
57777     57777     hunan          112.8667       27.2331          131       171     2012      02        16        047              0.000000       3.367645       0.713895       0.309613   -9999.000000   -9999.000000   -9999.000000   -9999.000000
57777     57777     hunan          112.8667       27.2331          131       171     2012      02        17        048              0.000000       3.122955       0.000000       0.307615   -9999.000000       0.294300   -9999.000000       0.291000
57777     57777     hunan          112.8667       27.2331          131       171     2012      02        18        049              0.000000       4.350922       0.000000       0.307992   -9999.000000       0.351400   -9999.000000       0.285000
57777     57777     hunan          112.8667       27.2331          131       171     2012      02        19        050              0.000000       3.712250       0.000000       0.306640       0.124000   -9999.000000       0.071100   -9999.000000
57777     57777     hunan          112.8667       27.2331          131       171     2012      02        20        051              0.000000       7.674805       0.000000       0.305611   -9999.000000       0.344100       0.059400       0.205000
57777     57777     hunan          112.8667       27.2331          131       171     2012      02        21        052              0.000000       7.937653       0.000000       0.305721   -9999.000000   -9999.000000   -9999.000000   -9999.000000
57777     57777     hunan          112.8667       27.2331          131       171     2012      02        22        053              0.000000       8.582886      23.580494       0.305589       0.131000       0.286100   -9999.000000       0.210000
57777     57777     hunan          112.8667       27.2331          131       171     2012      02        23        054              0.000000       8.113312      12.294375       0.322842       0.140000       0.384400   -9999.000000       0.882000
57777     57777     hunan          112.8667       27.2331          131       171     2012      02        24        055              0.000000       6.944061       1.816544       0.334421   -9999.000000   -9999.000000   -9999.000000   -9999.000000
57777     57777     hunan          112.8667       27.2331          131       171     2012      02        25        056              0.000000       4.912262       1.260085       0.320047   -9999.000000       0.233600       0.071100       0.376000
57777     57777     hunan          112.8667       27.2331          131       171     2012      02        26        057              0.000000       3.386566       0.000000       0.315442   -9999.000000       0.576500       0.069800   -9999.000000
57777     57777     hunan          112.8667       27.2331          131       171     2012      02        27        058              0.000000       2.537628       0.437375       0.308852   -9999.000000       0.248700   -9999.000000       0.331000
57777     57777     hunan          112.8667       27.2331          131       171     2012      02        28        059              0.000000       3.503448       2.336738       0.309713       0.139000       0.257600   -9999.000000   -9999.000000
57777     57777     hunan          112.8667       27.2331          131       171     2012      02        29        060              0.000000   -9999.000000       0.513087   -9999.000000   -9999.000000   -9999.000000   -9999.000000   -9999.000000
57777     57777     hunan          112.8667       27.2331          131       171     2012      03        01        061              0.000000       6.704926       0.780124       0.311592       0.181000       0.226200       0.067000       0.274000
57777     57777     hunan          112.8667       27.2331          131       171     2012      03        02        062              0.000000       5.880310       5.925671       0.313090   -9999.000000       0.162400       0.075600   -9999.000000
57777     57777     hunan          112.8667       27.2331          131       171     2012      03        03        063              0.000000       5.033997       5.157239       0.316768       0.224000   -9999.000000       0.070400       0.734000
57777     57777     hunan          112.8667       27.2331          131       171     2012      03        04        064              0.000000       4.991425      26.602932       0.322242   -9999.000000       0.164200   -9999.000000   -9999.000000
57777     57777     hunan          112.8667       27.2331          131       171     2012      03        05        065              0.000000       4.923676       0.425038       0.342301   -9999.000000   -9999.000000   -9999.000000       0.513000
57777     57777     hunan          112.8667       27.2331          131       171     2012      03        06        066              0.000000       6.584351       7.584172       0.325572       0.207000   -9999.000000   -9999.000000       0.429000
57777     57777     hunan          112.8667       27.2331          131       171     2012      03        07        067              0.000000       5.293762       0.816222       0.328231   -9999.000000       0.320600       0.070000   -9999.000000
57777     57777     hunan          112.8667       27.2331          131       171     2012      03        08        068              0.000000       5.370880       3.940430       0.322543   -9999.000000   -9999.000000       0.068200       0.593000
57777     57777     hunan          112.8667       27.2331          131       171     2012      03        09        069              0.000000       4.524323       1.789197       0.323002   -9999.000000       0.246500       0.070300   -9999.000000
57777     57777     hunan          112.8667       27.2331          131       171     2012      03        10        070              0.000000       4.103180       0.000000       0.321703   -9999.000000   -9999.000000   -9999.000000       0.303000
57777     57777     hunan          112.8667       27.2331          131       171     2012      03        11        071              0.000000       6.501068       0.000000       0.315935       0.118000       0.354300   -9999.000000   -9999.000000
57777     57777     hunan          112.8667       27.2331          131       171     2012      03        12        072              0.000000       7.749573       0.000000       0.313162   -9999.000000       0.183500   -9999.000000       0.441000
57777     57777     hunan          112.8667       27.2331          131       171     2012      03        13        073              0.000000       8.538605       0.331437       0.310861   -9999.000000   -9999.000000       0.065500       0.293000
57777     57777     hunan          112.8667       27.2331          131       171     2012      03        14        074              0.000000       8.274384       4.004865       0.309963       0.148000       0.355600       0.075200   -9999.000000
57777     57777     hunan          112.8667       27.2331          131       171     2012      03        15        075              0.000000       9.065430       0.645047       0.313809       0.132500   -9999.000000       0.064100       0.457000
57777     57777     hunan          112.8667       27.2331          131       171     2012      03        16        076              0.000000      11.168396       0.058915       0.314951       0.133000       0.320300   -9999.000000   -9999.000000
57777     57777     hunan          112.8667       27.2331          131       171     2012      03        17        077              0.000000      11.447815       0.000000       0.310646       0.122000       0.476100   -9999.000000       0.470000
57777     57777     hunan          112.8667       27.2331          131       171     2012      03        18        078              0.000000      11.957458       4.909442       0.309434   -9999.000000   -9999.000000       0.065000       0.453000
57777     57777     hunan          112.8667       27.2331          131       171     2012      03        19        079              0.000000      13.453522       0.927572       0.315369   -9999.000000       0.210800       0.090100   -9999.000000
57777     57777     hunan          112.8667       27.2331          131       171     2012      03        20        080              0.000000      12.128540       0.617257       0.313726       0.142500       0.201000       0.082900       0.349000
57777     57777     hunan          112.8667       27.2331          131       171     2012      03        21        081              0.000000       8.928436       0.000000       0.309910       0.118000       0.244100   -9999.000000   -9999.000000
57777     57777     hunan          112.8667       27.2331          131       171     2012      03        22        082              0.000000      10.121368       7.194586       0.308310       0.129000       0.197700   -9999.000000       0.523000
57777     57777     hunan          112.8667       27.2331          131       171     2012      03        23        083              0.000000       8.426239       0.265312       0.314984   -9999.000000   -9999.000000   -9999.000000       0.564000
57777     57777     hunan          112.8667       27.2331          131       171     2012      03        24        084              0.000000       9.775574       0.000000       0.313384   -9999.000000   -9999.000000   -9999.000000   -9999.000000
57777     57777     hunan          112.8667       27.2331          131       171     2012      03        25        085              0.000000      13.069122       0.000000       0.304734       0.091000   -9999.000000       0.073600       0.335000
57777     57777     hunan          112.8667       27.2331          131       171     2012      03        26        086              0.000000      14.756073       0.000000       0.301400       0.097500   -9999.000000       0.081000   -9999.000000
57777     57777     hunan          112.8667       27.2331          131       171     2012      03        27        087              0.000000      16.099274       0.000000       0.298300       0.087000       0.357100   -9999.000000       0.305000
57777     57777     hunan          112.8667       27.2331          131       171     2012      03        28        088              0.000000      17.673492       9.437821       0.295894   -9999.000000   -9999.000000   -9999.000000   -9999.000000
57777     57777     hunan          112.8667       27.2331          131       171     2012      03        29        089              0.000000      16.948364      12.606948       0.309382   -9999.000000       0.337100       0.094600       0.684000
57777     57777     hunan          112.8667       27.2331          131       171     2012      03        30        090              0.000000      15.889465      11.374976       0.324376       0.133000       0.248200       0.091500       1.000000
57777     57777     hunan          112.8667       27.2331          131       171     2012      03        31        091              0.000000      14.163177       0.000000       0.328529       0.083000   -9999.000000       0.097700   -9999.000000
57777     57777     hunan          112.8667       27.2331          131       171     2012      04        01        092              0.000000      15.587708       0.000000       0.307831       0.118000       0.267300       0.081900       0.406000
57777     57777     hunan          112.8667       27.2331          131       171     2012      04        02        093              0.000000      18.623962       0.000000       0.301229   -9999.000000   -9999.000000   -9999.000000   -9999.000000
57777     57777     hunan          112.8667       27.2331          131       171     2012      04        03        094              0.000000      21.207642       0.000000       0.297298   -9999.000000       0.217600   -9999.000000       0.205000
57777     57777     hunan          112.8667       27.2331          131       171     2012      04        04        095              0.000000      18.940826       0.607947       0.295094       0.144000       0.163400       0.099300       0.230000
57777     57777     hunan          112.8667       27.2331          131       171     2012      04        05        096              0.000000      14.821320       0.000000       0.299293       0.125000   -9999.000000       0.106100   -9999.000000
57777     57777     hunan          112.8667       27.2331          131       171     2012      04        06        097              0.000000      15.128571       0.731259       0.297334       0.122500       0.180000       0.092800       0.312000
57777     57777     hunan          112.8667       27.2331          131       171     2012      04        07        098              0.000000      14.584137       2.941363       0.298087       0.113000       0.055300   -9999.000000   -9999.000000
57777     57777     hunan          112.8667       27.2331          131       171     2012      04        08        099              0.000000      16.937836       0.336478       0.299294   -9999.000000       0.282500   -9999.000000       0.345000
57777     57777     hunan          112.8667       27.2331          131       171     2012      04        09        100              0.000000      16.372284       0.000000       0.301745       0.138000       0.155000   -9999.000000   -9999.000000
57777     57777     hunan          112.8667       27.2331          131       171     2012      04        10        101              0.000000      18.150482       1.842779       0.297445       0.128500   -9999.000000       0.083500       0.396000
57777     57777     hunan          112.8667       27.2331          131       171     2012      04        11        102              0.000000      21.013641       8.125357       0.297309       0.155500   -9999.000000       0.093800       0.523000
57777     57777     hunan          112.8667       27.2331          131       171     2012      04        12        103              0.000000      18.384186       5.930079       0.311525       0.145000   -9999.000000       0.078500   -9999.000000
57777     57777     hunan          112.8667       27.2331          131       171     2012      04        13        104              0.000000      17.876221       0.439228       0.308952   -9999.000000   -9999.000000   -9999.000000       0.244000
57777     57777     hunan          112.8667       27.2331          131       171     2012      04        14        105              0.000000      15.550415       3.729346       0.301458       0.187000       0.388200   -9999.000000   -9999.000000
57777     57777     hunan          112.8667       27.2331          131       171     2012      04        15        106              0.000000      15.342896       0.597858       0.306701       0.192000   -9999.000000       0.093500       0.448000
57777     57777     hunan          112.8667       27.2331          131       171     2012      04        16        107              0.000000      14.564056       0.579460       0.301096       0.162500       0.342500       0.145900       0.533000
57777     57777     hunan          112.8667       27.2331          131       171     2012      04        17        108              0.000000      15.979004       6.953888       0.298870       0.175500       0.325400       0.149500   -9999.000000
57777     57777     hunan          112.8667       27.2331          131       171     2012      04        18        109              0.000000      15.833527       0.000000       0.313279   -9999.000000   -9999.000000   -9999.000000       0.413000
57777     57777     hunan          112.8667       27.2331          131       171     2012      04        19        110              0.000000      18.129791       2.844731       0.303484   -9999.000000       0.310000   -9999.000000   -9999.000000
57777     57777     hunan          112.8667       27.2331          131       171     2012      04        20        111              0.000000      19.229706       8.874186       0.307395       0.217000   -9999.000000   -9999.000000       0.638000
57777     57777     hunan          112.8667       27.2331          131       171     2012      04        21        112              0.000000      17.280243       0.000000       0.317750       0.146000       0.249800       0.136200       0.561000
57777     57777     hunan          112.8667       27.2331          131       171     2012      04        22        113              0.000000      19.777100       0.000000       0.299458       0.164000       0.184900       0.138300       0.395000
57777     57777     hunan          112.8667       27.2331          131       171     2012      04        23        114              0.000000      22.257904       1.208618       0.291317   -9999.000000   -9999.000000       0.123000       0.351000
57777     57777     hunan          112.8667       27.2331          131       171     2012      04        24        115              0.000000      22.173309      19.479296       0.294145   -9999.000000       0.304800   -9999.000000   -9999.000000
57777     57777     hunan          112.8667       27.2331          131       171     2012      04        25        116              0.000000      24.324371       2.081665       0.324363   -9999.000000       0.359500   -9999.000000       0.537000
57777     57777     hunan          112.8667       27.2331          131       171     2012      04        26        117              0.000000      16.387604       0.000000       0.312612       0.186000       0.372000   -9999.000000   -9999.000000
57777     57777     hunan          112.8667       27.2331          131       171     2012      04        27        118              0.000000      19.933563       0.000000       0.299006       0.177000       0.235700       0.115800       0.325000
57777     57777     hunan          112.8667       27.2331          131       171     2012      04        28        119              0.000000      22.588684       0.363398       0.294909       0.175000   -9999.000000       0.138700       0.563000
57777     57777     hunan          112.8667       27.2331          131       171     2012      04        29        120              0.000000      22.641663       0.853516       0.293237   -9999.000000       0.483200       0.123600   -9999.000000
57777     57777     hunan          112.8667       27.2331          131       171     2012      04        30        121              0.000000      22.569031      12.927832       0.294086       0.232000       0.614900   -9999.000000       0.828000
57777     57777     hunan          112.8667       27.2331          131       171     2012      05        01        122              0.000000      22.897736      13.877691       0.319294       0.277000   -9999.000000   -9999.000000   -9999.000000
57777     57777     hunan          112.8667       27.2331          131       171     2012      05        02        123              0.000000      19.826843       0.286355       0.326748       0.250000       0.646400       0.127400       0.553000
57777     57777     hunan          112.8667       27.2331          131       171     2012      05        03        124              0.000000      20.539032       7.817481       0.308088       0.260000   -9999.000000       0.130400       0.773000
57777     57777     hunan          112.8667       27.2331          131       171     2012      05        04        125              0.000000      19.499084       0.304272       0.318643   -9999.000000       0.481100       0.123400   -9999.000000
57777     57777     hunan          112.8667       27.2331          131       171     2012      05        05        126              0.000000      19.956146      12.135648       0.307614   -9999.000000   -9999.000000       0.104200       0.620000
57777     57777     hunan          112.8667       27.2331          131       171     2012      05        06        127              0.000000      23.456818       4.613874       0.302517       0.220000   -9999.000000   -9999.000000   -9999.000000
57777     57777     hunan          112.8667       27.2331          131       171     2012      05        07        128              0.000000      24.981079       0.000000       0.298647   -9999.000000       0.417000   -9999.000000       0.411000
57777     57777     hunan          112.8667       27.2331          131       171     2012      05        08        129              0.000000      26.806610       1.468011       0.291920       0.208500   -9999.000000       0.145800   -9999.000000
57777     57777     hunan          112.8667       27.2331          131       171     2012      05        09        130              0.000000      26.443909      28.046289       0.292727   -9999.000000       0.489400       0.180100       0.912000
57777     57777     hunan          112.8667       27.2331          131       171     2012      05        10        131              0.000000      23.036407       0.303378       0.334567   -9999.000000       0.469800       0.153400       0.470000
57777     57777     hunan          112.8667       27.2331          131       171     2012      05        11        132              0.000000      23.080872       0.281985       0.312429       0.272000   -9999.000000   -9999.000000   -9999.000000
57777     57777     hunan          112.8667       27.2331          131       171     2012      05        12        133              0.000000      24.753723      24.380215       0.303429       0.302000       0.469900   -9999.000000       0.654000
57777     57777     hunan          112.8667       27.2331          131       171     2012      05        13        134              0.000000      21.805145       2.779690       0.337562       0.297000       0.262600   -9999.000000   -9999.000000
57777     57777     hunan          112.8667       27.2331          131       171     2012      05        14        135              0.000000      20.635101      22.778164       0.316902   -9999.000000       0.526400       0.186200       0.540000
57777     57777     hunan          112.8667       27.2331          131       171     2012      05        15        136              0.000000      17.589813       6.824671       0.339483   -9999.000000       0.308700       0.186000       0.615000
57777     57777     hunan          112.8667       27.2331          131       171     2012      05        16        137              0.000000      20.679688       5.049747       0.317538       0.264000   -9999.000000       0.171200   -9999.000000
57777     57777     hunan          112.8667       27.2331          131       171     2012      05        17        138              0.000000      23.171387       1.908781       0.312166       0.246500       0.507300   -9999.000000       0.315000
57777     57777     hunan          112.8667       27.2331          131       171     2012      05        18        139              0.000000      24.438721       5.139633       0.306937       0.215000   -9999.000000   -9999.000000   -9999.000000
57777     57777     hunan          112.8667       27.2331          131       171     2012      05        19        140              0.000000      26.511536       0.628317       0.309735       0.259000   -9999.000000       0.168000       0.363000
57777     57777     hunan          112.8667       27.2331          131       171     2012      05        20        141              0.000000      22.405548       0.000000       0.311014   -9999.000000       0.430300       0.159500       0.496000
57777     57777     hunan          112.8667       27.2331          131       171     2012      05        21        142              0.000000      24.310486       0.719287       0.304204       0.359000   -9999.000000       0.149600   -9999.000000
57777     57777     hunan          112.8667       27.2331          131       171     2012      05        22        143              0.000000      24.261047      14.549796       0.301109       0.441500       0.519000       0.177000       0.658000
57777     57777     hunan          112.8667       27.2331          131       171     2012      05        23        144              0.000000      21.206268       7.665171       0.318900   -9999.000000       0.256700   -9999.000000   -9999.000000
57777     57777     hunan          112.8667       27.2331          131       171     2012      05        24        145              0.000000      20.330017      11.616191       0.325540       0.443000   -9999.000000   -9999.000000       0.761000
57777     57777     hunan          112.8667       27.2331          131       171     2012      05        25        146              0.000000      19.233459      16.043613       0.326871   -9999.000000       0.304300       0.165700   -9999.000000
57777     57777     hunan          112.8667       27.2331          131       171     2012      05        26        147              0.000000      18.495422      11.554005       0.335470   -9999.000000   -9999.000000       0.177100       0.705000
57777     57777     hunan          112.8667       27.2331          131       171     2012      05        27        148              0.000000      19.395996       1.028780       0.333862       0.408500       0.338700       0.169700       0.900000
57777     57777     hunan          112.8667       27.2331          131       171     2012      05        28        149              0.000000      21.736359       0.368624       0.322173       0.381500       0.473100   -9999.000000   -9999.000000
57777     57777     hunan          112.8667       27.2331          131       171     2012      05        29        150              0.000000      22.804260      14.580011       0.317838       0.405500   -9999.000000   -9999.000000       0.836000
57777     57777     hunan          112.8667       27.2331          131       171     2012      05        30        151              0.000000      23.704346       0.178430       0.328644   -9999.000000       0.340900   -9999.000000   -9999.000000
57777     57777     hunan          112.8667       27.2331          131       171     2012      05        31        152              0.000000      21.826569       6.492128       0.319449   -9999.000000       0.379400       0.168400   -9999.000000
57777     57777     hunan          112.8667       27.2331          131       171     2012      06        01        153              0.000000      22.972076      12.314791       0.319691       0.460500   -9999.000000       0.172400       0.919000
57777     57777     hunan          112.8667       27.2331          131       171     2012      06        02        154              0.000000      20.239868      29.979836       0.332249       0.455000       0.286300       0.169400   -9999.000000
57777     57777     hunan          112.8667       27.2331          131       171     2012      06        03        155              0.000000      21.457825      24.159801       0.319547       0.476500   -9999.000000   -9999.000000       0.851000
57777     57777     hunan          112.8667       27.2331          131       171     2012      06        04        156              0.000000      21.379028       5.810225       0.338333       0.497000       0.526400   -9999.000000   -9999.000000
57777     57777     hunan          112.8667       27.2331          131       171     2012      06        05        157              0.000000      20.825439       1.192213       0.333164   -9999.000000       0.463800       0.122400       0.510000
57777     57777     hunan          112.8667       27.2331          131       171     2012      06        06        158              0.000000      22.494141       1.621662       0.324899       0.449000   -9999.000000       0.119300   -9999.000000
57777     57777     hunan          112.8667       27.2331          131       171     2012      06        07        159              0.000000      23.895020       3.022437       0.322101       0.439000       0.418900       0.128800       0.638000
57777     57777     hunan          112.8667       27.2331          131       171     2012      06        08        160              0.000000      24.683990       3.570911       0.319395       0.408500   -9999.000000   -9999.000000       0.607000
57777     57777     hunan          112.8667       27.2331          131       171     2012      06        09        161              0.000000      25.779358      10.346845       0.315157       0.373000       0.297800   -9999.000000   -9999.000000
57777     57777     hunan          112.8667       27.2331          131       171     2012      06        10        162              0.000000      27.409546      23.518965       0.322624   -9999.000000       0.475000   -9999.000000       0.602000
57777     57777     hunan          112.8667       27.2331          131       171     2012      06        11        163              0.000000      27.082428       7.989857       0.334291       0.343000   -9999.000000       0.102000   -9999.000000
57777     57777     hunan          112.8667       27.2331          131       171     2012      06        12        164              0.000000      23.960541       0.000000       0.333573       0.314000       0.377100       0.105300       0.418000
57777     57777     hunan          112.8667       27.2331          131       171     2012      06        13        165              0.000000      25.922485       0.559080       0.320528       0.300000   -9999.000000       0.099300       0.560000
57777     57777     hunan          112.8667       27.2331          131       171     2012      06        14        166              0.000000      27.562469       4.566246       0.315401       0.291500       0.317500   -9999.000000   -9999.000000
57777     57777     hunan          112.8667       27.2331          131       171     2012      06        15        167              0.000000      26.509247       0.000000       0.317662   -9999.000000       0.299700   -9999.000000       0.297000
57777     57777     hunan          112.8667       27.2331          131       171     2012      06        16        168              0.000000      26.958099       1.195707       0.308973   -9999.000000   -9999.000000   -9999.000000   -9999.000000
57777     57777     hunan          112.8667       27.2331          131       171     2012      06        17        169              0.000000      27.227722       5.758016       0.306394       0.303500       0.431100       0.098900       0.542000
57777     57777     hunan          112.8667       27.2331          131       171     2012      06        18        170              0.000000      25.818726       3.454041       0.312576       0.264500       0.257200       0.097100       0.450000
57777     57777     hunan          112.8667       27.2331          131       171     2012      06        19        171              0.000000      26.732025       9.596634       0.305903       0.268000       0.344900       0.095000       0.359000
57777     57777     hunan          112.8667       27.2331          131       171     2012      06        20        172              0.000000      27.331848      40.641415       0.302086   -9999.000000       0.265100   -9999.000000       0.283000
57777     57777     hunan          112.8667       27.2331          131       171     2012      06        21        173              0.000000      27.856567       4.585627       0.300666   -9999.000000   -9999.000000   -9999.000000   -9999.000000
57777     57777     hunan          112.8667       27.2331          131       171     2012      06        22        174              0.000000      28.312225       3.311035       0.301595   -9999.000000       0.369700       0.093200       0.346000
57777     57777     hunan          112.8667       27.2331          131       171     2012      06        23        175              0.000000      26.261139       1.640976       0.306514       0.349000       0.427400       0.093900   -9999.000000
57777     57777     hunan          112.8667       27.2331          131       171     2012      06        24        176              0.000000      24.039795       6.218593       0.306723       0.334000   -9999.000000       0.092100       0.698000
57777     57777     hunan          112.8667       27.2331          131       171     2012      06        25        177              0.000000      26.834381       2.881814       0.307453       0.318000       0.268200   -9999.000000       0.620000
57777     57777     hunan          112.8667       27.2331          131       171     2012      06        26        178              0.000000      26.615021       4.326808       0.304038   -9999.000000   -9999.000000   -9999.000000   -9999.000000
57777     57777     hunan          112.8667       27.2331          131       171     2012      06        27        179              0.000000      25.713409       7.006808       0.306397       0.381000       0.348500   -9999.000000       0.786000
57777     57777     hunan          112.8667       27.2331          131       171     2012      06        28        180              0.000000      26.682739       1.630783       0.310735       0.325000       0.399600       0.124500   -9999.000000
57777     57777     hunan          112.8667       27.2331          131       171     2012      06        29        181              0.000000      28.096405       0.801002       0.300799       0.306000   -9999.000000       0.116700   -9999.000000
57777     57777     hunan          112.8667       27.2331          131       171     2012      06        30        182              0.000000      29.065399       1.016758       0.294678       0.268000       0.309900       0.117900   -9999.000000
57777     57777     hunan          112.8667       27.2331          131       171     2012      07        01        183              0.000000      28.904755       1.610164       0.287331   -9999.000000   -9999.000000   -9999.000000   -9999.000000
57777     57777     hunan          112.8667       27.2331          131       171     2012      07        02        184              0.000000      28.456390       0.698412       0.281612       0.395000       0.389700   -9999.000000       0.325000
57777     57777     hunan          112.8667       27.2331          131       171     2012      07        03        185              0.000000      28.616577       0.000000       0.278829       0.353500   -9999.000000       0.144700   -9999.000000
57777     57777     hunan          112.8667       27.2331          131       171     2012      07        04        186              0.000000      29.103271       2.782066       0.274119       0.314000   -9999.000000       0.141500       0.232000
57777     57777     hunan          112.8667       27.2331          131       171     2012      07        05        187              0.000000      29.631104       0.000000       0.270657       0.298000       0.386300       0.144000   -9999.000000
57777     57777     hunan          112.8667       27.2331          131       171     2012      07        06        188              0.000000      29.839081       0.000000       0.266575   -9999.000000   -9999.000000       0.133300       0.249000
57777     57777     hunan          112.8667       27.2331          131       171     2012      07        07        189              0.000000      30.240509       0.000000       0.262791   -9999.000000       0.510400   -9999.000000       0.232000
57777     57777     hunan          112.8667       27.2331          131       171     2012      07        08        190              0.000000      29.720306       0.976166       0.258865       0.336000       0.407000   -9999.000000   -9999.000000
57777     57777     hunan          112.8667       27.2331          131       171     2012      07        09        191              0.000000      29.878723       0.000000       0.255755       0.315500   -9999.000000       0.148700       0.197000
57777     57777     hunan          112.8667       27.2331          131       171     2012      07        10        192              0.000000      29.887878       0.000000       0.251347       0.324500       0.281600       0.146800   -9999.000000
57777     57777     hunan          112.8667       27.2331          131       171     2012      07        11        193              0.000000      29.914093       0.000000       0.247067       0.268000       0.296500       0.141400       0.281000
57777     57777     hunan          112.8667       27.2331          131       171     2012      07        12        194              0.000000      30.486115       2.437159       0.242587   -9999.000000   -9999.000000   -9999.000000       0.286000
57777     57777     hunan          112.8667       27.2331          131       171     2012      07        13        195              0.000000      30.032471       0.501206       0.240038       0.337000       0.155000   -9999.000000   -9999.000000
57777     57777     hunan          112.8667       27.2331          131       171     2012      07        14        196              0.000000      30.069031      19.360001       0.236050       0.347000   -9999.000000   -9999.000000       0.606000
57777     57777     hunan          112.8667       27.2331          131       171     2012      07        15        197              0.000000      26.255249       5.447814       0.296649       0.349000       0.350000       0.181600   -9999.000000
57777     57777     hunan          112.8667       27.2331          131       171     2012      07        16        198              0.000000      26.465302      42.967716       0.303836       0.321000       0.314500       0.161600       0.997000
57777     57777     hunan          112.8667       27.2331          131       171     2012      07        17        199              0.000000      25.738831      22.078175       0.338919   -9999.000000   -9999.000000       0.196900       0.960000
57777     57777     hunan          112.8667       27.2331          131       171     2012      07        18        200              0.000000      25.518341      18.043076       0.342962   -9999.000000       0.279100   -9999.000000       0.821000
57777     57777     hunan          112.8667       27.2331          131       171     2012      07        19        201              0.000000      26.777557       0.000000       0.333808       0.369500   -9999.000000   -9999.000000       0.453000
57777     57777     hunan          112.8667       27.2331          131       171     2012      07        20        202              0.000000      27.402954       8.008491       0.312074       0.313500       0.295100       0.216500   -9999.000000
57777     57777     hunan          112.8667       27.2331          131       171     2012      07        21        203              0.000000      28.271973       0.000000       0.312787       0.285500       0.352300       0.207600       0.364000
57777     57777     hunan          112.8667       27.2331          131       171     2012      07        22        204              0.000000      29.848572       3.776714       0.299502   -9999.000000   -9999.000000       0.218500   -9999.000000
57777     57777     hunan          112.8667       27.2331          131       171     2012      07        23        205              0.000000      29.789917      25.670429       0.300835   -9999.000000       0.335500       0.166200       0.664000
57777     57777     hunan          112.8667       27.2331          131       171     2012      07        24        206              0.000000      27.897644       1.411632       0.328876       0.341000   -9999.000000   -9999.000000       0.550000
57777     57777     hunan          112.8667       27.2331          131       171     2012      07        25        207              0.000000      27.065643       0.000000       0.309777       0.306500       0.350600   -9999.000000   -9999.000000
57777     57777     hunan          112.8667       27.2331          131       171     2012      07        26        208              0.000000      28.637634       1.616666       0.298317       0.290000       0.274000       0.163400       0.301000
57777     57777     hunan          112.8667       27.2331          131       171     2012      07        27        209              0.000000      28.442291       8.694214       0.295907       0.245000   -9999.000000       0.183800   -9999.000000
57777     57777     hunan          112.8667       27.2331          131       171     2012      07        28        210              0.000000      28.622925       6.489713       0.308362   -9999.000000       0.385100       0.154500       0.290000
57777     57777     hunan          112.8667       27.2331          131       171     2012      07        29        211              0.000000      29.045288       1.555235       0.298650       0.306000       0.174300   -9999.000000       0.394000
57777     57777     hunan          112.8667       27.2331          131       171     2012      07        30        212              0.000000      29.291840       1.746884       0.295692       0.281500   -9999.000000   -9999.000000   -9999.000000
57777     57777     hunan          112.8667       27.2331          131       171     2012      07        31        213              0.000000      30.415100       0.000000       0.292039       0.263000       0.268600   -9999.000000       0.272000
57777     57777     hunan          112.8667       27.2331          131       171     2012      08        01        214              0.000000      30.718140       5.833043       0.286925       0.275000   -9999.000000       0.188100   -9999.000000
57777     57777     hunan          112.8667       27.2331          131       171     2012      08        02        215              0.000000      30.462402       1.801078       0.296408   -9999.000000   -9999.000000       0.199100       0.168000
57777     57777     hunan          112.8667       27.2331          131       171     2012      08        03        216              0.000000      29.656433       0.481197       0.290181   -9999.000000       0.213500       0.179800   -9999.000000
57777     57777     hunan          112.8667       27.2331          131       171     2012      08        04        217              0.000000      29.188934      60.937340       0.285204       0.384000   -9999.000000   -9999.000000       0.941000
57777     57777     hunan          112.8667       27.2331          131       171     2012      08        05        218              0.000000      25.776520       0.794686       0.354329       0.315500       0.539400   -9999.000000       0.482000
57777     57777     hunan          112.8667       27.2331          131       171     2012      08        06        219              0.000000      24.950562       4.250721       0.320450       0.268500   -9999.000000       0.145400   -9999.000000
57777     57777     hunan          112.8667       27.2331          131       171     2012      08        07        220              0.000000      27.308228       0.501350       0.316260       0.262000   -9999.000000       0.139400       0.268000
57777     57777     hunan          112.8667       27.2331          131       171     2012      08        08        221              0.000000      28.642944       0.000000       0.307744   -9999.000000       0.303700       0.139900   -9999.000000
57777     57777     hunan          112.8667       27.2331          131       171     2012      08        09        222              0.000000      28.953156       0.967239       0.302238   -9999.000000   -9999.000000   -9999.000000       0.275000
57777     57777     hunan          112.8667       27.2331          131       171     2012      08        10        223              0.000000      28.165222       0.289313       0.300825       0.292500       0.243400   -9999.000000       0.277000
57777     57777     hunan          112.8667       27.2331          131       171     2012      08        11        224              0.000000      28.592834       3.241801       0.297344       0.284500       0.458400   -9999.000000   -9999.000000
57777     57777     hunan          112.8667       27.2331          131       171     2012      08        12        225              0.000000      29.045715       6.521651       0.295178       0.271000       0.261800       0.133500       0.220000
57777     57777     hunan          112.8667       27.2331          131       171     2012      08        13        226              0.000000      28.827576       4.980195       0.303562   -9999.000000       0.248700       0.197400   -9999.000000
57777     57777     hunan          112.8667       27.2331          131       171     2012      08        14        227              0.000000      28.378021       3.712641       0.306226   -9999.000000   -9999.000000       0.205200       0.297000
57777     57777     hunan          112.8667       27.2331          131       171     2012      08        15        228              0.000000      28.226837       0.137989       0.307348       0.294000       0.229700   -9999.000000       0.213000
57777     57777     hunan          112.8667       27.2331          131       171     2012      08        16        229              0.000000      29.206543       0.751005       0.297189       0.275000       0.164300   -9999.000000       0.203000
57777     57777     hunan          112.8667       27.2331          131       171     2012      08        17        230              0.000000      29.597717       1.136157       0.293568       0.297000   -9999.000000   -9999.000000       0.268000
57777     57777     hunan          112.8667       27.2331          131       171     2012      08        18        231              0.000000      28.873352       0.536658       0.292242   -9999.000000       0.066000       0.203100   -9999.000000
57777     57777     hunan          112.8667       27.2331          131       171     2012      08        19        232              0.000000      29.795563       2.036441       0.286658   -9999.000000   -9999.000000       0.199900       0.249000
57777     57777     hunan          112.8667       27.2331          131       171     2012      08        20        233              0.000000      30.215057       1.968848       0.283984       0.290000   -9999.000000       0.134400   -9999.000000
57777     57777     hunan          112.8667       27.2331          131       171     2012      08        21        234              0.000000      29.932251       7.847402       0.283309       0.335000       0.472600   -9999.000000   -9999.000000
57777     57777     hunan          112.8667       27.2331          131       171     2012      08        22        235              0.000000      27.510651      32.835949       0.298136       0.400000   -9999.000000   -9999.000000   -9999.000000
57777     57777     hunan          112.8667       27.2331          131       171     2012      08        23        236              0.000000      23.691345       2.812628       0.337408       0.379000       0.243900       0.149700   -9999.000000
57777     57777     hunan          112.8667       27.2331          131       171     2012      08        24        237              0.000000      22.671356       1.229146       0.317259   -9999.000000   -9999.000000       0.152700       0.429000
57777     57777     hunan          112.8667       27.2331          131       171     2012      08        25        238              0.000000      23.852325       0.496096       0.307886       0.352000       0.263100       0.156600   -9999.000000
57777     57777     hunan          112.8667       27.2331          131       171     2012      08        26        239              0.000000      25.081451       0.623586       0.301507       0.344000       0.402900   -9999.000000       0.329000
57777     57777     hunan          112.8667       27.2331          131       171     2012      08        27        240              0.000000      26.829620       1.071598       0.298308       0.309500   -9999.000000   -9999.000000       0.339000
57777     57777     hunan          112.8667       27.2331          131       171     2012      08        28        241              0.000000      25.577393       2.124008       0.296387       0.318500       0.396300   -9999.000000   -9999.000000
57777     57777     hunan          112.8667       27.2331          131       171     2012      08        29        242              0.000000      26.998901       0.429943       0.293523   -9999.000000   -9999.000000       0.171900       0.272000
57777     57777     hunan          112.8667       27.2331          131       171     2012      08        30        243              0.000000      28.236420       0.000000       0.290021   -9999.000000       0.271600       0.173200   -9999.000000
57777     57777     hunan          112.8667       27.2331          131       171     2012      08        31        244              0.000000      28.311584       0.957794       0.287165       0.328500       0.152600       0.172300       0.192000
57777     57777     hunan          112.8667       27.2331          131       171     2012      09        01        245              0.000000      28.587036       0.000000       0.283775       0.295000   -9999.000000   -9999.000000   -9999.000000
57777     57777     hunan          112.8667       27.2331          131       171     2012      09        02        246              0.000000      28.871521       5.743820       0.279836       0.301500       0.196200   -9999.000000       0.346000
57777     57777     hunan          112.8667       27.2331          131       171     2012      09        03        247              0.000000      27.819855       1.018729       0.291749       0.324000       0.145500       0.183700       0.256000
57777     57777     hunan          112.8667       27.2331          131       171     2012      09        04        248              0.000000      24.071655       0.533268       0.294503   -9999.000000       0.220200       0.175000   -9999.000000
57777     57777     hunan          112.8667       27.2331          131       171     2012      09        05        249              0.000000      24.737366       0.585640       0.284871       0.317000       0.332200       0.186300       0.089000
57777     57777     hunan          112.8667       27.2331          131       171     2012      09        06        250              0.000000      25.068359       2.412076       0.280519       0.300000   -9999.000000       0.167700   -9999.000000
57777     57777     hunan          112.8667       27.2331          131       171     2012      09        07        251              0.000000      26.945282       7.701335       0.279569       0.312000       0.166400   -9999.000000       0.275000
57777     57777     hunan          112.8667       27.2331          131       171     2012      09        08        252              0.000000      27.659149       1.683014       0.278311       0.269000       0.164000   -9999.000000       0.413000
57777     57777     hunan          112.8667       27.2331          131       171     2012      09        09        253              0.000000      27.603271       0.649342       0.272755   -9999.000000   -9999.000000       0.176000   -9999.000000
57777     57777     hunan          112.8667       27.2331          131       171     2012      09        10        254              0.000000      25.396484       5.814425       0.275727   -9999.000000       0.132500       0.197200       0.181000
57777     57777     hunan          112.8667       27.2331          131       171     2012      09        11        255              0.000000      25.541443       1.247069       0.280254       0.244000   -9999.000000       0.191600   -9999.000000
57777     57777     hunan          112.8667       27.2331          131       171     2012      09        12        256              0.000000      27.211487       5.183121       0.278983       0.234500       0.209400   -9999.000000       0.321000
57777     57777     hunan          112.8667       27.2331          131       171     2012      09        13        257              0.000000      24.287354       0.800831       0.285950       0.258000       0.244400   -9999.000000       0.490000
57777     57777     hunan          112.8667       27.2331          131       171     2012      09        14        258              0.000000      20.277191       3.041650       0.291619   -9999.000000   -9999.000000   -9999.000000   -9999.000000
57777     57777     hunan          112.8667       27.2331          131       171     2012      09        15        259              0.000000      20.880768       2.331674       0.285089   -9999.000000       0.371700       0.191600       0.103000
57777     57777     hunan          112.8667       27.2331          131       171     2012      09        16        260              0.000000      21.442902       0.000000       0.280423       0.243000   -9999.000000       0.196700   -9999.000000
57777     57777     hunan          112.8667       27.2331          131       171     2012      09        17        261              0.000000      21.845001       0.000000       0.278652       0.243500       0.308800       0.188700       0.155000
57777     57777     hunan          112.8667       27.2331          131       171     2012      09        18        262              0.000000      21.374969       0.000000       0.277184       0.236000       0.183600   -9999.000000   -9999.000000
57777     57777     hunan          112.8667       27.2331          131       171     2012      09        19        263              0.000000      22.632599       0.000000       0.274599       0.228000   -9999.000000   -9999.000000       0.225000
57777     57777     hunan          112.8667       27.2331          131       171     2012      09        20        264              0.000000      23.403961      25.271227       0.271635   -9999.000000       0.190700       0.222500       0.283000
57777     57777     hunan          112.8667       27.2331          131       171     2012      09        21        265              0.000000      22.324951      21.730055       0.300323   -9999.000000       0.317200       0.228600   -9999.000000
57777     57777     hunan          112.8667       27.2331          131       171     2012      09        22        266              0.000000      21.539337       7.377825       0.335348       0.311500   -9999.000000       0.220200       0.903000
57777     57777     hunan          112.8667       27.2331          131       171     2012      09        23        267              0.000000      21.091400      18.336945       0.324576       0.317000       0.377800       0.202700   -9999.000000
57777     57777     hunan          112.8667       27.2331          131       171     2012      09        24        268              0.000000      20.981293       5.306550       0.333926       0.324000   -9999.000000   -9999.000000       0.830000
57777     57777     hunan          112.8667       27.2331          131       171     2012      09        25        269              0.000000      21.056396       0.158951       0.321698   -9999.000000       0.294200   -9999.000000       0.838000
57777     57777     hunan          112.8667       27.2331          131       171     2012      09        26        270              0.000000      22.542206       0.135220       0.306422   -9999.000000       0.178300       0.246600   -9999.000000
57777     57777     hunan          112.8667       27.2331          131       171     2012      09        27        271              0.000000      22.958099       0.000000       0.300411       0.282500   -9999.000000       0.239000       0.473000
57777     57777     hunan          112.8667       27.2331          131       171     2012      09        28        272              0.000000      22.438904       0.000000       0.297553       0.263000   -9999.000000       0.239800   -9999.000000
57777     57777     hunan          112.8667       27.2331          131       171     2012      09        29        273              0.000000      22.120026       0.000000       0.292627       0.259000   -9999.000000   -9999.000000       0.251000
57777     57777     hunan          112.8667       27.2331          131       171     2012      09        30        274              0.000000      20.606293       0.000000       0.289456       0.242000   -9999.000000   -9999.000000   -9999.000000
57777     57777     hunan          112.8667       27.2331          131       171     2012      10        01        275              0.000000      20.759338       0.000000       0.288008   -9999.000000       0.226900   -9999.000000       0.261000
57777     57777     hunan          112.8667       27.2331          131       171     2012      10        02        276              0.000000      20.862244       0.279659       0.285990       0.183000   -9999.000000       0.178800       0.324000
57777     57777     hunan          112.8667       27.2331          131       171     2012      10        03        277              0.000000      21.626862       0.000000       0.285005       0.190000   -9999.000000       0.200800   -9999.000000
57777     57777     hunan          112.8667       27.2331          131       171     2012      10        04        278              0.000000      19.924316       0.264843       0.285728       0.195500   -9999.000000       0.189200       0.196000
57777     57777     hunan          112.8667       27.2331          131       171     2012      10        05        279              0.000000      19.413757       0.085673       0.286815       0.208500   -9999.000000   -9999.000000   -9999.000000
57777     57777     hunan          112.8667       27.2331          131       171     2012      10        06        280              0.000000      18.702087       0.000000       0.286659   -9999.000000       0.355600   -9999.000000       0.256000
57777     57777     hunan          112.8667       27.2331          131       171     2012      10        07        281              0.000000      18.033875       0.000000       0.286855   -9999.000000   -9999.000000       0.177900       0.253000
57777     57777     hunan          112.8667       27.2331          131       171     2012      10        08        282              0.000000      20.057037       0.000000       0.285595       0.201000       0.193100       0.136600   -9999.000000
57777     57777     hunan          112.8667       27.2331          131       171     2012      10        09        283              0.000000      20.394226       0.101548       0.284320       0.177500       0.556000       0.127500       0.157000
57777     57777     hunan          112.8667       27.2331          131       171     2012      10        10        284              0.000000      18.636047       0.646793       0.284937       0.178500       0.156200   -9999.000000   -9999.000000
57777     57777     hunan          112.8667       27.2331          131       171     2012      10        11        285              0.311400      20.179016       0.000000       0.282444   -9999.000000       0.235400   -9999.000000       0.219000
57777     57777     hunan          112.8667       27.2331          131       171     2012      10        12        286              0.310708      20.028503       0.537877       0.279563   -9999.000000   -9999.000000   -9999.000000       0.324000
57777     57777     hunan          112.8667       27.2331          131       171     2012      10        13        287              0.309708      20.948212       0.000000       0.278731       0.166000       0.146800       0.126900       0.142000
57777     57777     hunan          112.8667       27.2331          131       171     2012      10        14        288              0.309000      20.874847       0.000000       0.277725       0.170500       0.136300       0.131100       0.153000
57777     57777     hunan          112.8667       27.2331          131       171     2012      10        15        289              0.309167      19.777679       0.946126       0.278707       0.161000   -9999.000000       0.165900   -9999.000000
57777     57777     hunan          112.8667       27.2331          131       171     2012      10        16        290              0.309083      21.016357       5.710729       0.279563       0.170000       0.219000   -9999.000000       0.774000
57777     57777     hunan          112.8667       27.2331          131       171     2012      10        17        291              0.309750      19.194885       0.000000       0.294220   -9999.000000   -9999.000000   -9999.000000   -9999.000000
57777     57777     hunan          112.8667       27.2331          131       171     2012      10        18        292              0.309792      18.160767       0.000000       0.286581   -9999.000000       0.312100   -9999.000000       0.174000
57777     57777     hunan          112.8667       27.2331          131       171     2012      10        19        293              0.309667      18.141510       0.000000       0.281513       0.163000       0.300700       0.165700       0.335000
57777     57777     hunan          112.8667       27.2331          131       171     2012      10        20        294              0.309500      19.381439       0.339851       0.279825       0.144000   -9999.000000       0.162000   -9999.000000
57777     57777     hunan          112.8667       27.2331          131       171     2012      10        21        295              0.309250      22.179138       1.030474       0.277796       0.193500       0.309200       0.164300       0.388000
57777     57777     hunan          112.8667       27.2331          131       171     2012      10        22        296              0.308292      22.326080       3.919827       0.279281   -9999.000000   -9999.000000   -9999.000000   -9999.000000
57777     57777     hunan          112.8667       27.2331          131       171     2012      10        23        297              0.309042      16.806000       0.444059       0.292273   -9999.000000       0.244300   -9999.000000       0.221000
57777     57777     hunan          112.8667       27.2331          131       171     2012      10        24        298              0.309500      16.198792       0.000000       0.285060   -9999.000000       0.319800       0.094000       0.490000
57777     57777     hunan          112.8667       27.2331          131       171     2012      10        25        299              0.000000      18.228241       0.000000       0.282388       0.207000   -9999.000000       0.099000   -9999.000000
57777     57777     hunan          112.8667       27.2331          131       171     2012      10        26        300              0.309000      19.258667       0.000000       0.279669       0.205500       0.343100       0.097900       0.183000
57777     57777     hunan          112.8667       27.2331          131       171     2012      10        27        301              0.308333      20.305542       2.778501       0.277773       0.192000       0.323800   -9999.000000   -9999.000000
57777     57777     hunan          112.8667       27.2331          131       171     2012      10        28        302              0.000000      19.841919       5.039550       0.280450   -9999.000000       0.189100   -9999.000000       0.287000
57777     57777     hunan          112.8667       27.2331          131       171     2012      10        29        303              0.324375      18.399506      19.637808       0.293834       0.266000       0.269400   -9999.000000   -9999.000000
57777     57777     hunan          112.8667       27.2331          131       171     2012      10        30        304              0.326958      18.067230       0.000000       0.324254       0.231000   -9999.000000       0.127800       0.474000
57777     57777     hunan          112.8667       27.2331          131       171     2012      10        31        305              0.325125      16.017029       0.000000       0.307308       0.213000       0.287400       0.124500       0.314000
57777     57777     hunan          112.8667       27.2331          131       171     2012      11        01        306              0.323750      16.019592       1.407925       0.296889       0.191500       0.383000       0.133400   -9999.000000
57777     57777     hunan          112.8667       27.2331          131       171     2012      11        02        307              0.323208      15.387634       1.448178       0.294480   -9999.000000   -9999.000000   -9999.000000       0.192000
57777     57777     hunan          112.8667       27.2331          131       171     2012      11        03        308              0.323500      16.352661       2.669901       0.290942   -9999.000000       0.194000   -9999.000000   -9999.000000
57777     57777     hunan          112.8667       27.2331          131       171     2012      11        04        309              0.323417      14.231354       3.323122       0.294931       0.213000   -9999.000000       0.122600       0.271000
57777     57777     hunan          112.8667       27.2331          131       171     2012      11        05        310              0.323000      14.414215       2.923243       0.292375       0.204500       0.455600       0.126200       0.464000
57777     57777     hunan          112.8667       27.2331          131       171     2012      11        06        311              0.323250      15.009064       6.478866       0.293591       0.209500       0.249400       0.121700   -9999.000000
57777     57777     hunan          112.8667       27.2331          131       171     2012      11        07        312              0.335042      14.435028      35.552643       0.298177       0.246000   -9999.000000       0.127200       0.741000
57777     57777     hunan          112.8667       27.2331          131       171     2012      11        08        313              0.335571      12.849182      23.358397       0.340439   -9999.000000       0.278200   -9999.000000   -9999.000000
57777     57777     hunan          112.8667       27.2331          131       171     2012      11        09        314              0.336042      12.032745      20.146935       0.356841       0.273000   -9999.000000   -9999.000000       1.000000
57777     57777     hunan          112.8667       27.2331          131       171     2012      11        10        315              0.332083      12.168823       1.413051       0.353215       0.267000       0.363000       0.142300       0.831000
57777     57777     hunan          112.8667       27.2331          131       171     2012      11        11        316              0.328125      11.596100       0.821295       0.331487       0.184000       0.210700       0.146700       0.322000
57777     57777     hunan          112.8667       27.2331          131       171     2012      11        12        317              0.326750      12.979828       0.876778       0.313500       0.191000   -9999.000000       0.133200       0.345000
57777     57777     hunan          112.8667       27.2331          131       171     2012      11        13        318              0.000000      12.607574       3.991086       0.308699   -9999.000000       0.245600   -9999.000000   -9999.000000
57777     57777     hunan          112.8667       27.2331          131       171     2012      11        14        319              0.327417      14.063263      12.432528       0.306487   -9999.000000       0.429200   -9999.000000       0.628000
57777     57777     hunan          112.8667       27.2331          131       171     2012      11        15        320              0.331208      14.445465      13.694836       0.319539       0.236000       0.250300   -9999.000000   -9999.000000
57777     57777     hunan          112.8667       27.2331          131       171     2012      11        16        321              0.334583      12.471436      22.153461       0.330722   -9999.000000       0.340500       0.141000       0.776000
57777     57777     hunan          112.8667       27.2331          131       171     2012      11        17        322              0.000000       8.693665       0.603686       0.342281       0.190000   -9999.000000       0.148300       0.749000
57777     57777     hunan          112.8667       27.2331          131       171     2012      11        18        323              0.327500       8.017975       1.487597       0.321272   -9999.000000       0.242700       0.134700   -9999.000000
57777     57777     hunan          112.8667       27.2331          131       171     2012      11        19        324              0.327000       8.660828       0.555723       0.316526   -9999.000000       0.223200   -9999.000000       0.491000
57777     57777     hunan          112.8667       27.2331          131       171     2012      11        20        325              0.327583      10.995636       1.025710       0.313725       0.241000   -9999.000000   -9999.000000   -9999.000000
57777     57777     hunan          112.8667       27.2331          131       171     2012      11        21        326              0.329087      12.794098       2.245700       0.313074       0.209500       0.377400       0.143000       0.498000
57777     57777     hunan          112.8667       27.2331          131       171     2012      11        22        327              0.331417      11.572327      22.903492       0.314085       0.216000   -9999.000000       0.129400       0.810000
57777     57777     hunan          112.8667       27.2331          131       171     2012      11        23        328              0.327917      10.525665       1.056356       0.337797       0.217000       0.322800       0.138900   -9999.000000
57777     57777     hunan          112.8667       27.2331          131       171     2012      11        24        329              0.327000       9.412445       2.724925       0.321386   -9999.000000       0.318600       0.135100       0.458000
57777     57777     hunan          112.8667       27.2331          131       171     2012      11        25        330              0.329292      10.721771       2.544908       0.319378   -9999.000000   -9999.000000   -9999.000000   -9999.000000
57777     57777     hunan          112.8667       27.2331          131       171     2012      11        26        331              0.327417       9.414124       0.901261       0.320657       0.180000       0.227500   -9999.000000       0.316000
57777     57777     hunan          112.8667       27.2331          131       171     2012      11        27        332              0.326542       9.626434       5.880446       0.314204       0.210000   -9999.000000       0.108700   -9999.000000
57777     57777     hunan          112.8667       27.2331          131       171     2012      11        28        333              0.327417       9.072968       0.155847       0.316790       0.201000       0.447100       0.106000       0.502000
57777     57777     hunan          112.8667       27.2331          131       171     2012      11        29        334              0.327000       9.085083       4.158889       0.316091   -9999.000000       0.312800       0.106000       0.595000
57777     57777     hunan          112.8667       27.2331          131       171     2012      11        30        335              0.329292       8.848480      24.085217       0.316168   -9999.000000   -9999.000000   -9999.000000   -9999.000000
57777     57777     hunan          112.8667       27.2331          131       171     2012      12        01        336              0.330708       8.011597       4.483146       0.332945       0.229000       0.385600   -9999.000000       0.562000
57777     57777     hunan          112.8667       27.2331          131       171     2012      12        02        337              0.327542       7.603638       1.244330       0.331166   -9999.000000   -9999.000000   -9999.000000   -9999.000000
57777     57777     hunan          112.8667       27.2331          131       171     2012      12        03        338              0.326667       6.905518       3.987362       0.322529   -9999.000000       0.522200       0.104500       0.376000
57777     57777     hunan          112.8667       27.2331          131       171     2012      12        04        339              0.326125       7.254150       9.120136       0.319893       0.183000       0.244800       0.106300       0.558000
57777     57777     hunan          112.8667       27.2331          131       171     2012      12        05        340              0.325792       7.750854       5.904488       0.317731   -9999.000000   -9999.000000       0.096000   -9999.000000
57777     57777     hunan          112.8667       27.2331          131       171     2012      12        06        341              0.325542       8.460785       7.401263       0.314662   -9999.000000       0.432500   -9999.000000       0.264000
57777     57777     hunan          112.8667       27.2331          131       171     2012      12        07        342              0.325250       8.938568       8.439749       0.312094       0.178500       0.303600   -9999.000000   -9999.000000
57777     57777     hunan          112.8667       27.2331          131       171     2012      12        08        343              0.325250      10.533112       8.211581       0.311422       0.178500   -9999.000000       0.095700       0.340000
57777     57777     hunan          112.8667       27.2331          131       171     2012      12        09        344              0.328042      10.156219      18.690805       0.310626       0.185000       0.314000       0.111900       0.308000
57777     57777     hunan          112.8667       27.2331          131       171     2012      12        10        345              0.333875       7.635040      11.988024       0.325487   -9999.000000   -9999.000000       0.091300       0.587000
57777     57777     hunan          112.8667       27.2331          131       171     2012      12        11        346              0.328458       5.972717       0.581132       0.336006   -9999.000000   -9999.000000   -9999.000000       0.309000
57777     57777     hunan          112.8667       27.2331          131       171     2012      12        12        347              0.328417       5.997925       2.432117       0.321488       0.218000       0.323200   -9999.000000   -9999.000000
57777     57777     hunan          112.8667       27.2331          131       171     2012      12        13        348              0.328250       6.950195       3.198074       0.321449       0.192500   -9999.000000   -9999.000000       0.515000
57777     57777     hunan          112.8667       27.2331          131       171     2012      12        14        349              0.326750      10.529510       9.878067       0.317381       0.203500       0.198300       0.090200   -9999.000000
57777     57777     hunan          112.8667       27.2331          131       171     2012      12        15        350              0.000000       9.167328       1.365268       0.315743   -9999.000000   -9999.000000       0.087900       0.468000
57777     57777     hunan          112.8667       27.2331          131       171     2012      12        16        351              0.327708       7.531830       3.154495       0.315282   -9999.000000   -9999.000000       0.084700       0.421000
57777     57777     hunan          112.8667       27.2331          131       171     2012      12        17        352              0.332250       7.642365      14.300571       0.316279       0.242000       0.300000   -9999.000000   -9999.000000
57777     57777     hunan          112.8667       27.2331          131       171     2012      12        18        353              0.329333       5.660065       1.256343       0.331387   -9999.000000   -9999.000000   -9999.000000       0.496000
57777     57777     hunan          112.8667       27.2331          131       171     2012      12        19        354              0.329500       4.049255       6.144533       0.321407       0.246000       0.306700       0.088000   -9999.000000
57777     57777     hunan          112.8667       27.2331          131       171     2012      12        20        355              0.000000       5.040741      15.610469       0.322508       0.247000   -9999.000000       0.091500       0.739000
57777     57777     hunan          112.8667       27.2331          131       171     2012      12        21        356              0.329833       4.333405       0.909428       0.334561   -9999.000000       0.498200       0.091700       0.440000
57777     57777     hunan          112.8667       27.2331          131       171     2012      12        22        357              0.327375       3.298309       0.831447       0.326835   -9999.000000       0.551600       0.076800   -9999.000000
57777     57777     hunan          112.8667       27.2331          131       171     2012      12        23        358              0.326000       3.448700       2.289889       0.320923   -9999.000000   -9999.000000   -9999.000000       0.165000
57777     57777     hunan          112.8667       27.2331          131       171     2012      12        24        359              0.325579       3.949524       1.990075       0.315407       0.161000       0.591900   -9999.000000   -9999.000000
57777     57777     hunan          112.8667       27.2331          131       171     2012      12        25        360              0.325292       4.540192       0.433433       0.314162       0.175000       0.608000       0.101700       0.255000
57777     57777     hunan          112.8667       27.2331          131       171     2012      12        26        361              0.000000       3.302277      16.066452       0.312875   -9999.000000   -9999.000000       0.107500   -9999.000000
57777     57777     hunan          112.8667       27.2331          131       171     2012      12        27        362              0.334917       1.691711       2.925038       0.312597   -9999.000000   -9999.000000       0.106200       0.719000
57777     57777     hunan          112.8667       27.2331          131       171     2012      12        28        363              0.329000       2.700836      11.631273       0.316175       0.236000   -9999.000000   -9999.000000       0.687000
57777     57777     hunan          112.8667       27.2331          131       171     2012      12        29        364              0.000000       2.545654       8.495770       0.330896   -9999.000000   -9999.000000   -9999.000000   -9999.000000
57777     57777     hunan          112.8667       27.2331          131       171     2012      12        30        365              0.000000       3.009796       1.513606       0.322737   -9999.000000       0.212000   -9999.000000       0.103000
57777     57777     hunan          112.8667       27.2331          131       171     2012      12        31        366              0.327400       2.484650       0.647328       0.331191   -9999.000000   -9999.000000       0.106200   -9999.000000
