# Supplementary material for: Research on Fusing Multisatellite Soil Moisture Data Based on Bayesian Model Averaging
Source: Hindawi journal article supplement (doi:10.1155/2018/9310838), 2018-06-25
Supplement: f1 [file 9310838.f1.zip › 2012_sm00-10cm_daily_ZDB_ZHY_57778_366days_allin.txt]

57778     57778     hunan          112.9497       27.1000          132       172     2012      01        01        001              0.000000   -9999.000000       0.000000   -9999.000000       0.118000   -9999.000000       0.087400   -9999.000000
57778     57778     hunan          112.9497       27.1000          132       172     2012      01        02        002              0.000000       6.123535       4.632948       0.401971       0.136000       0.288600   -9999.000000       0.556000
57778     57778     hunan          112.9497       27.1000          132       172     2012      01        03        003              0.000000       5.905090       3.227858       0.402918   -9999.000000       0.086900   -9999.000000       0.560000
57778     57778     hunan          112.9497       27.1000          132       172     2012      01        04        004              0.000000       3.319733       7.907780       0.404213   -9999.000000       0.378400   -9999.000000   -9999.000000
57778     57778     hunan          112.9497       27.1000          132       172     2012      01        05        005              0.000000       4.871948       5.295066       0.401964   -9999.000000       0.134000       0.078100       0.731000
57778     57778     hunan          112.9497       27.1000          132       172     2012      01        06        006              0.000000       2.746765       0.593606       0.411159   -9999.000000   -9999.000000       0.083700   -9999.000000
57778     57778     hunan          112.9497       27.1000          132       172     2012      01        07        007              0.000000       3.872131       0.000000       0.403597   -9999.000000   -9999.000000       0.087300       0.326000
57778     57778     hunan          112.9497       27.1000          132       172     2012      01        08        008              0.000000       4.389160       0.000000       0.399473   -9999.000000   -9999.000000   -9999.000000       0.288000
57778     57778     hunan          112.9497       27.1000          132       172     2012      01        09        009              0.000000       4.410156       5.236925       0.397417   -9999.000000   -9999.000000   -9999.000000   -9999.000000
57778     57778     hunan          112.9497       27.1000          132       172     2012      01        10        010              0.000000       4.873871       0.000000       0.396232   -9999.000000       0.389000       0.074300       0.218000
57778     57778     hunan          112.9497       27.1000          132       172     2012      01        11        011              0.000000       5.289276       0.000000       0.395272   -9999.000000   -9999.000000       0.069900   -9999.000000
57778     57778     hunan          112.9497       27.1000          132       172     2012      01        12        012              0.000000       5.162170       2.955323       0.394715       0.111000       0.431800       0.070900       0.360000
57778     57778     hunan          112.9497       27.1000          132       172     2012      01        13        013              0.000000       5.772552       3.902780       0.396903       0.122000       0.379700       0.077200       0.365000
57778     57778     hunan          112.9497       27.1000          132       172     2012      01        14        014              0.000000       5.201477      17.491457       0.400099   -9999.000000   -9999.000000   -9999.000000       0.689000
57778     57778     hunan          112.9497       27.1000          132       172     2012      01        15        015              0.000000       4.735931      14.560725       0.415602   -9999.000000       0.516900   -9999.000000       0.969000
57778     57778     hunan          112.9497       27.1000          132       172     2012      01        16        016              0.000000       3.436371       0.130462       0.419290   -9999.000000   -9999.000000       0.077500   -9999.000000
57778     57778     hunan          112.9497       27.1000          132       172     2012      01        17        017              0.000000       4.089142       4.739818       0.407712       0.137000       0.199200       0.086000       0.527000
57778     57778     hunan          112.9497       27.1000          132       172     2012      01        18        018              0.000000       5.111237       9.817969       0.408445   -9999.000000   -9999.000000       0.088600   -9999.000000
57778     57778     hunan          112.9497       27.1000          132       172     2012      01        19        019              0.000000       4.575958       0.769832       0.415940   -9999.000000   -9999.000000   -9999.000000       0.666000
57778     57778     hunan          112.9497       27.1000          132       172     2012      01        20        020              0.000000       4.549957       3.198063       0.409302   -9999.000000       0.504200   -9999.000000       0.615000
57778     57778     hunan          112.9497       27.1000          132       172     2012      01        21        021              0.000000       4.597565       2.197145       0.409263   -9999.000000       0.206200   -9999.000000   -9999.000000
57778     57778     hunan          112.9497       27.1000          132       172     2012      01        22        022              0.000000       2.962006       0.518531       0.406916   -9999.000000   -9999.000000       0.073400       0.346000
57778     57778     hunan          112.9497       27.1000          132       172     2012      01        23        023              0.000000       1.678772       0.455695       0.396867   -9999.000000       0.294500       0.071100   -9999.000000
57778     57778     hunan          112.9497       27.1000          132       172     2012      01        24        024              0.000000       1.775116       0.104741       0.395659   -9999.000000   -9999.000000   -9999.000000       0.311000
57778     57778     hunan          112.9497       27.1000          132       172     2012      01        25        025              0.000000       1.587463       1.369381       0.390678   -9999.000000   -9999.000000   -9999.000000       0.374000
57778     57778     hunan          112.9497       27.1000          132       172     2012      01        26        026              0.000000       3.531219       0.105871       0.400328   -9999.000000       0.175300   -9999.000000   -9999.000000
57778     57778     hunan          112.9497       27.1000          132       172     2012      01        27        027              0.000000       3.016968       1.443464       0.402127       0.154000   -9999.000000       0.075100       0.557000
57778     57778     hunan          112.9497       27.1000          132       172     2012      01        28        028              0.000000       3.119904       0.158330       0.403481   -9999.000000       0.312100       0.064400   -9999.000000
57778     57778     hunan          112.9497       27.1000          132       172     2012      01        29        029              0.000000       3.867859       0.000000       0.402317   -9999.000000   -9999.000000       0.065000       0.487000
57778     57778     hunan          112.9497       27.1000          132       172     2012      01        30        030              0.000000       5.265625       0.000000       0.400984   -9999.000000       0.188300       0.083300   -9999.000000
57778     57778     hunan          112.9497       27.1000          132       172     2012      01        31        031              0.000000       4.484650       0.915649       0.400297   -9999.000000       0.363700   -9999.000000       0.181000
57778     57778     hunan          112.9497       27.1000          132       172     2012      02        01        032              0.000000       7.342957       0.964307       0.398909       0.134500   -9999.000000   -9999.000000       0.225000
57778     57778     hunan          112.9497       27.1000          132       172     2012      02        02        033              0.000000       6.346954       1.880796       0.399249   -9999.000000       0.284300       0.076900   -9999.000000
57778     57778     hunan          112.9497       27.1000          132       172     2012      02        03        034              0.000000       2.888824       0.596262       0.400878   -9999.000000   -9999.000000       0.082500       0.336000
57778     57778     hunan          112.9497       27.1000          132       172     2012      02        04        035              0.000000       4.154053       1.059930       0.399709   -9999.000000       0.342500       0.094900   -9999.000000
57778     57778     hunan          112.9497       27.1000          132       172     2012      02        05        036              0.000000       4.779724       3.850748       0.399679   -9999.000000   -9999.000000   -9999.000000       0.460000
57778     57778     hunan          112.9497       27.1000          132       172     2012      02        06        037              0.000000       5.700409       4.038799       0.401659   -9999.000000   -9999.000000   -9999.000000       0.671000
57778     57778     hunan          112.9497       27.1000          132       172     2012      02        07        038              0.000000       5.288513       0.108311       0.405568   -9999.000000       0.389900   -9999.000000   -9999.000000
57778     57778     hunan          112.9497       27.1000          132       172     2012      02        08        039              0.000000       4.335876       0.000000       0.400215   -9999.000000       0.172000       0.073000       0.427000
57778     57778     hunan          112.9497       27.1000          132       172     2012      02        09        040              0.000000       3.602264       0.196728       0.398611   -9999.000000       0.100500       0.069400   -9999.000000
57778     57778     hunan          112.9497       27.1000          132       172     2012      02        10        041              0.000000       2.898682       1.721584       0.397779   -9999.000000       0.271000       0.071300       0.180000
57778     57778     hunan          112.9497       27.1000          132       172     2012      02        11        042              0.000000       3.404297       0.000000       0.397299       0.143000   -9999.000000   -9999.000000       0.354000
57778     57778     hunan          112.9497       27.1000          132       172     2012      02        12        043              0.000000       4.684357       0.484476       0.396778   -9999.000000   -9999.000000   -9999.000000   -9999.000000
57778     57778     hunan          112.9497       27.1000          132       172     2012      02        13        044              0.000000       5.009888       0.145095       0.396861   -9999.000000   -9999.000000   -9999.000000       0.417000
57778     57778     hunan          112.9497       27.1000          132       172     2012      02        14        045              0.000000       5.828278       1.402468       0.396391   -9999.000000   -9999.000000       0.089200   -9999.000000
57778     57778     hunan          112.9497       27.1000          132       172     2012      02        15        046              0.000000       5.916260       0.625271       0.395686   -9999.000000       0.175600       0.090400       0.440000
57778     57778     hunan          112.9497       27.1000          132       172     2012      02        16        047              0.000000       4.995880       7.045471       0.396154   -9999.000000   -9999.000000       0.080700   -9999.000000
57778     57778     hunan          112.9497       27.1000          132       172     2012      02        17        048              0.000000       4.724457       0.000000       0.395010   -9999.000000   -9999.000000   -9999.000000       0.428000
57778     57778     hunan          112.9497       27.1000          132       172     2012      02        18        049              0.000000       5.800751       0.000000       0.394248   -9999.000000   -9999.000000   -9999.000000       0.307000
57778     57778     hunan          112.9497       27.1000          132       172     2012      02        19        050              0.000000       5.171936       7.134027       0.393494       0.120500   -9999.000000       0.075900   -9999.000000
57778     57778     hunan          112.9497       27.1000          132       172     2012      02        20        051              0.000000       8.954926       0.866304       0.391639   -9999.000000       0.126900       0.065100       0.305000
57778     57778     hunan          112.9497       27.1000          132       172     2012      02        21        052              0.000000       9.233734       5.350157       0.391945   -9999.000000   -9999.000000   -9999.000000   -9999.000000
57778     57778     hunan          112.9497       27.1000          132       172     2012      02        22        053              0.000000       9.661621      12.901172       0.391706       0.120000       0.473800   -9999.000000       0.248000
57778     57778     hunan          112.9497       27.1000          132       172     2012      02        23        054              0.000000       9.005859      22.043386       0.400404       0.127000       0.352400   -9999.000000       0.899000
57778     57778     hunan          112.9497       27.1000          132       172     2012      02        24        055              0.000000       8.582642       2.772595       0.422156   -9999.000000   -9999.000000   -9999.000000   -9999.000000
57778     57778     hunan          112.9497       27.1000          132       172     2012      02        25        056              0.000000       6.613190       0.427670       0.409075   -9999.000000       0.388000       0.067300       0.355000
57778     57778     hunan          112.9497       27.1000          132       172     2012      02        26        057              0.000000       5.334625      21.135765       0.405223   -9999.000000       0.059400       0.068000   -9999.000000
57778     57778     hunan          112.9497       27.1000          132       172     2012      02        27        058              0.000000       4.423157       1.222956       0.403113   -9999.000000       0.328400   -9999.000000       0.437000
57778     57778     hunan          112.9497       27.1000          132       172     2012      02        28        059              0.000000       4.840698       3.396009       0.403847   -9999.000000       0.278400   -9999.000000   -9999.000000
57778     57778     hunan          112.9497       27.1000          132       172     2012      02        29        060              0.000000   -9999.000000       1.590229   -9999.000000   -9999.000000   -9999.000000   -9999.000000   -9999.000000
57778     57778     hunan          112.9497       27.1000          132       172     2012      03        01        061              0.000000       8.083710       1.236370       0.403939   -9999.000000       0.156000       0.071100       0.523000
57778     57778     hunan          112.9497       27.1000          132       172     2012      03        02        062              0.000000       7.299835       4.854051       0.405297   -9999.000000       0.138200       0.070000   -9999.000000
57778     57778     hunan          112.9497       27.1000          132       172     2012      03        03        063              0.000000       6.816284       4.111276       0.407221       0.191000   -9999.000000       0.067700       0.647000
57778     57778     hunan          112.9497       27.1000          132       172     2012      03        04        064              0.000000       7.051941      50.781803       0.409309   -9999.000000       0.274100   -9999.000000   -9999.000000
57778     57778     hunan          112.9497       27.1000          132       172     2012      03        05        065              0.000000       6.262146       0.798047       0.450258   -9999.000000   -9999.000000   -9999.000000       0.630000
57778     57778     hunan          112.9497       27.1000          132       172     2012      03        06        066              0.000000       7.380585       7.975978       0.495568       0.202000       0.481100   -9999.000000       0.555000
57778     57778     hunan          112.9497       27.1000          132       172     2012      03        07        067              0.000000       6.758759       0.960041       0.492669   -9999.000000       0.425600       0.074800   -9999.000000
57778     57778     hunan          112.9497       27.1000          132       172     2012      03        08        068              0.000000       7.197144       3.792206       0.444052   -9999.000000   -9999.000000       0.082000       0.690000
57778     57778     hunan          112.9497       27.1000          132       172     2012      03        09        069              0.000000       6.394958       0.677416       0.420573   -9999.000000       0.308900       0.081400   -9999.000000
57778     57778     hunan          112.9497       27.1000          132       172     2012      03        10        070              0.000000       6.012665       0.669305       0.415383   -9999.000000   -9999.000000   -9999.000000       0.459000
57778     57778     hunan          112.9497       27.1000          132       172     2012      03        11        071              0.000000       7.969116       0.000000       0.410221   -9999.000000       0.215300   -9999.000000       0.424000
57778     57778     hunan          112.9497       27.1000          132       172     2012      03        12        072              0.000000       9.161255       0.305385       0.407042   -9999.000000       0.355900   -9999.000000   -9999.000000
57778     57778     hunan          112.9497       27.1000          132       172     2012      03        13        073              0.000000       9.826447       0.000000       0.405320   -9999.000000   -9999.000000       0.066500       0.310000
57778     57778     hunan          112.9497       27.1000          132       172     2012      03        14        074              0.000000       9.774445       2.265870       0.403750       0.129000   -9999.000000       0.078200   -9999.000000
57778     57778     hunan          112.9497       27.1000          132       172     2012      03        15        075              0.000000      10.222992       0.609967       0.403922       0.119500   -9999.000000       0.076200       0.547000
57778     57778     hunan          112.9497       27.1000          132       172     2012      03        16        076              0.000000      11.927704       0.907560       0.404026       0.119500   -9999.000000   -9999.000000   -9999.000000
57778     57778     hunan          112.9497       27.1000          132       172     2012      03        17        077              0.000000      11.832153       0.197207       0.401079       0.109000       0.162900   -9999.000000       0.533000
57778     57778     hunan          112.9497       27.1000          132       172     2012      03        18        078              0.000000      11.709595       4.119020       0.400167   -9999.000000   -9999.000000       0.065100       0.565000
57778     57778     hunan          112.9497       27.1000          132       172     2012      03        19        079              0.000000      13.562836       0.258929       0.403548       0.123000   -9999.000000       0.094200   -9999.000000
57778     57778     hunan          112.9497       27.1000          132       172     2012      03        20        080              0.000000      13.158203       0.167441       0.400309   -9999.000000   -9999.000000       0.100800       0.482000
57778     57778     hunan          112.9497       27.1000          132       172     2012      03        21        081              0.000000       9.661774       6.240942       0.397894       0.113500   -9999.000000   -9999.000000   -9999.000000
57778     57778     hunan          112.9497       27.1000          132       172     2012      03        22        082              0.000000      11.094879       6.653947       0.396821       0.116000       0.118900   -9999.000000       0.654000
57778     57778     hunan          112.9497       27.1000          132       172     2012      03        23        083              0.000000       9.828094       0.425253       0.402400   -9999.000000   -9999.000000   -9999.000000       0.634000
57778     57778     hunan          112.9497       27.1000          132       172     2012      03        24        084              0.000000      11.424561       0.000000       0.399960   -9999.000000       0.261700   -9999.000000   -9999.000000
57778     57778     hunan          112.9497       27.1000          132       172     2012      03        25        085              0.000000      14.518036       0.000000       0.394189       0.092000       0.331300       0.085300       0.233000
57778     57778     hunan          112.9497       27.1000          132       172     2012      03        26        086              0.000000      16.316559       0.000000       0.391292       0.085000   -9999.000000       0.104100   -9999.000000
57778     57778     hunan          112.9497       27.1000          132       172     2012      03        27        087              0.000000      17.810364       0.000000       0.389022       0.084500       0.356800   -9999.000000       0.418000
57778     57778     hunan          112.9497       27.1000          132       172     2012      03        28        088              0.000000      19.279694       8.245473       0.387247   -9999.000000   -9999.000000   -9999.000000   -9999.000000
57778     57778     hunan          112.9497       27.1000          132       172     2012      03        29        089              0.000000      18.944885       5.863050       0.395111   -9999.000000       0.401200   -9999.000000       0.673000
57778     57778     hunan          112.9497       27.1000          132       172     2012      03        30        090              0.000000      17.504547       5.583055       0.404685       0.133000   -9999.000000       0.109200       0.932000
57778     57778     hunan          112.9497       27.1000          132       172     2012      03        31        091              0.000000      16.043915       0.421150       0.404311       0.081000   -9999.000000       0.105300   -9999.000000
57778     57778     hunan          112.9497       27.1000          132       172     2012      04        01        092              0.000000      16.910736       1.784988       0.394110       0.108000       0.211000       0.108800       0.402000
57778     57778     hunan          112.9497       27.1000          132       172     2012      04        02        093              0.000000      19.192810       0.527326       0.389707   -9999.000000   -9999.000000   -9999.000000   -9999.000000
57778     57778     hunan          112.9497       27.1000          132       172     2012      04        03        094              0.000000      21.338013       0.000000       0.386991   -9999.000000       0.210100   -9999.000000       0.389000
57778     57778     hunan          112.9497       27.1000          132       172     2012      04        04        095              0.000000      19.282043       0.913729       0.383994       0.138000       0.474000       0.109300       0.280000
57778     57778     hunan          112.9497       27.1000          132       172     2012      04        05        096              0.000000      15.899017       0.262988       0.387577       0.117000   -9999.000000       0.108200   -9999.000000
57778     57778     hunan          112.9497       27.1000          132       172     2012      04        06        097              0.000000      16.031433       1.046373       0.389026       0.113000       0.611700       0.118300       0.521000
57778     57778     hunan          112.9497       27.1000          132       172     2012      04        07        098              0.000000      15.929810       5.398595       0.391389       0.112000       0.133000   -9999.000000   -9999.000000
57778     57778     hunan          112.9497       27.1000          132       172     2012      04        08        099              0.000000      17.732239       0.669703       0.394333   -9999.000000   -9999.000000   -9999.000000       0.528000
57778     57778     hunan          112.9497       27.1000          132       172     2012      04        09        100              0.000000      17.534790       1.297335       0.396161       0.125000       0.533500   -9999.000000       0.530000
57778     57778     hunan          112.9497       27.1000          132       172     2012      04        10        101              0.000000      19.784424       0.313094       0.391713       0.123000   -9999.000000       0.089200       0.363000
57778     57778     hunan          112.9497       27.1000          132       172     2012      04        11        102              0.000000      22.701141       1.455907       0.388822       0.148000   -9999.000000       0.103900       0.486000
57778     57778     hunan          112.9497       27.1000          132       172     2012      04        12        103              0.000000      20.401855       5.705591       0.390607       0.136000   -9999.000000       0.098600   -9999.000000
57778     57778     hunan          112.9497       27.1000          132       172     2012      04        13        104              0.000000      19.807068       0.183847       0.395984   -9999.000000   -9999.000000   -9999.000000       0.353000
57778     57778     hunan          112.9497       27.1000          132       172     2012      04        14        105              0.000000      17.992828       0.988238       0.391031   -9999.000000       0.307300   -9999.000000   -9999.000000
57778     57778     hunan          112.9497       27.1000          132       172     2012      04        15        106              0.000000      17.022797       0.846034       0.391122       0.167000   -9999.000000       0.100300       0.497000
57778     57778     hunan          112.9497       27.1000          132       172     2012      04        16        107              0.000000      15.990356       0.383456       0.391154       0.152500       0.242500       0.149200       0.586000
57778     57778     hunan          112.9497       27.1000          132       172     2012      04        17        108              0.000000      16.904694      15.349392       0.390228       0.161000       0.275400       0.144300   -9999.000000
57778     57778     hunan          112.9497       27.1000          132       172     2012      04        18        109              0.000000      17.179382       1.952187       0.409486   -9999.000000   -9999.000000   -9999.000000       0.520000
57778     57778     hunan          112.9497       27.1000          132       172     2012      04        19        110              0.000000      18.970032       6.328314       0.401994   -9999.000000       0.301800   -9999.000000   -9999.000000
57778     57778     hunan          112.9497       27.1000          132       172     2012      04        20        111              0.000000      20.132935      10.568979       0.406109       0.181000   -9999.000000   -9999.000000       0.684000
57778     57778     hunan          112.9497       27.1000          132       172     2012      04        21        112              0.000000      18.899292       0.000000       0.408957       0.144000       0.334300       0.132500       0.699000
57778     57778     hunan          112.9497       27.1000          132       172     2012      04        22        113              0.000000      21.094421       0.000000       0.395002       0.146500       0.289700       0.143900   -9999.000000
57778     57778     hunan          112.9497       27.1000          132       172     2012      04        23        114              0.000000      22.849579       5.937769       0.389687   -9999.000000   -9999.000000       0.165400       0.630000
57778     57778     hunan          112.9497       27.1000          132       172     2012      04        24        115              0.000000      22.553192       7.097119       0.398221   -9999.000000       0.529600   -9999.000000   -9999.000000
57778     57778     hunan          112.9497       27.1000          132       172     2012      04        25        116              0.000000      25.105896       1.736719       0.399176   -9999.000000       0.705700   -9999.000000       0.776000
57778     57778     hunan          112.9497       27.1000          132       172     2012      04        26        117              0.000000      17.915863       0.000000       0.398649       0.172000   -9999.000000   -9999.000000   -9999.000000
57778     57778     hunan          112.9497       27.1000          132       172     2012      04        27        118              0.000000      21.388580       0.000000       0.392426       0.159500       0.317400   -9999.000000       0.432000
57778     57778     hunan          112.9497       27.1000          132       172     2012      04        28        119              0.000000      22.985809       0.168262       0.390401       0.157000   -9999.000000       0.160900       0.523000
57778     57778     hunan          112.9497       27.1000          132       172     2012      04        29        120              0.000000      23.691315       3.926245       0.389749   -9999.000000       0.659500       0.161700   -9999.000000
57778     57778     hunan          112.9497       27.1000          132       172     2012      04        30        121              0.000000      23.899719      39.858646       0.391919       0.202000       0.186900   -9999.000000       1.000000
57778     57778     hunan          112.9497       27.1000          132       172     2012      05        01        122              0.000000      25.460358      10.615682       0.441108       0.236000   -9999.000000   -9999.000000   -9999.000000
57778     57778     hunan          112.9497       27.1000          132       172     2012      05        02        123              0.000000      22.020691       0.163775       0.417693       0.220500       0.347500       0.162000       0.592000
57778     57778     hunan          112.9497       27.1000          132       172     2012      05        03        124              0.000000      22.026459       2.645547       0.404597       0.249000   -9999.000000       0.160800       0.903000
57778     57778     hunan          112.9497       27.1000          132       172     2012      05        04        125              0.000000      21.415802       1.028527       0.406354   -9999.000000       0.513400       0.156100   -9999.000000
57778     57778     hunan          112.9497       27.1000          132       172     2012      05        05        126              0.000000      21.946411      13.472927       0.403497   -9999.000000   -9999.000000       0.149100       0.645000
57778     57778     hunan          112.9497       27.1000          132       172     2012      05        06        127              0.000000      25.250336       0.000000       0.400510       0.192000   -9999.000000   -9999.000000   -9999.000000
57778     57778     hunan          112.9497       27.1000          132       172     2012      05        07        128              0.000000      26.992523       2.420353       0.397987   -9999.000000       0.352800   -9999.000000       0.527000
57778     57778     hunan          112.9497       27.1000          132       172     2012      05        08        129              0.000000      27.853943       0.455071       0.394622       0.184500   -9999.000000       0.148200       0.571000
57778     57778     hunan          112.9497       27.1000          132       172     2012      05        09        130              0.000000      27.854584      21.179005       0.392908   -9999.000000       0.391100       0.171500       1.000000
57778     57778     hunan          112.9497       27.1000          132       172     2012      05        10        131              0.000000      25.965607       0.523333       0.415703   -9999.000000       0.598200       0.174200       0.588000
57778     57778     hunan          112.9497       27.1000          132       172     2012      05        11        132              0.000000      24.962219       0.198252       0.403117       0.220500   -9999.000000   -9999.000000   -9999.000000
57778     57778     hunan          112.9497       27.1000          132       172     2012      05        12        133              0.000000      26.844086      22.233759       0.398974       0.245000       0.501200   -9999.000000       0.869000
57778     57778     hunan          112.9497       27.1000          132       172     2012      05        13        134              0.000000      24.194092       4.953004       0.444140       0.263000   -9999.000000   -9999.000000   -9999.000000
57778     57778     hunan          112.9497       27.1000          132       172     2012      05        14        135              0.000000      22.062469      17.467897       0.414413   -9999.000000       0.379400       0.181800       0.761000
57778     57778     hunan          112.9497       27.1000          132       172     2012      05        15        136              0.000000      19.964661       0.965559       0.422145   -9999.000000       0.735600       0.183200       0.634000
57778     57778     hunan          112.9497       27.1000          132       172     2012      05        16        137              0.000000      21.778900       0.000000       0.411972       0.211000   -9999.000000       0.179400   -9999.000000
57778     57778     hunan          112.9497       27.1000          132       172     2012      05        17        138              0.000000      24.351349       0.000000       0.407900       0.199500   -9999.000000   -9999.000000       0.398000
57778     57778     hunan          112.9497       27.1000          132       172     2012      05        18        139              0.000000      26.227325       0.263495       0.404192       0.201000   -9999.000000   -9999.000000   -9999.000000
57778     57778     hunan          112.9497       27.1000          132       172     2012      05        19        140              0.000000      28.184204       0.886779       0.402111       0.219000   -9999.000000       0.162200       0.416000
57778     57778     hunan          112.9497       27.1000          132       172     2012      05        20        141              0.000000      24.590149       0.000000       0.401877   -9999.000000       0.275600       0.153100       0.492000
57778     57778     hunan          112.9497       27.1000          132       172     2012      05        21        142              0.000000      25.576782       0.398711       0.398739       0.259000   -9999.000000       0.121200   -9999.000000
57778     57778     hunan          112.9497       27.1000          132       172     2012      05        22        143              0.000000      26.077728       6.100026       0.396164       0.364500       0.512200       0.138300       0.619000
57778     57778     hunan          112.9497       27.1000          132       172     2012      05        23        144              0.000000      23.289673       4.578328       0.401598   -9999.000000       0.320400   -9999.000000   -9999.000000
57778     57778     hunan          112.9497       27.1000          132       172     2012      05        24        145              0.000000      22.383667       4.162532       0.405991       0.363000   -9999.000000   -9999.000000       0.840000
57778     57778     hunan          112.9497       27.1000          132       172     2012      05        25        146              0.000000      21.303070       4.189416       0.403310   -9999.000000       0.330000       0.133400   -9999.000000
57778     57778     hunan          112.9497       27.1000          132       172     2012      05        26        147              0.000000      20.547272       3.700012       0.405512   -9999.000000   -9999.000000       0.135800       0.718000
57778     57778     hunan          112.9497       27.1000          132       172     2012      05        27        148              0.000000      21.321045       0.803697       0.404859       0.321500       0.600600       0.142800       0.785000
57778     57778     hunan          112.9497       27.1000          132       172     2012      05        28        149              0.000000      23.516968       0.000000       0.401237       0.289500       0.825000   -9999.000000   -9999.000000
57778     57778     hunan          112.9497       27.1000          132       172     2012      05        29        150              0.000000      24.828217      17.395639       0.398451       0.319500   -9999.000000   -9999.000000       0.918000
57778     57778     hunan          112.9497       27.1000          132       172     2012      05        30        151              0.000000      25.922485       0.283088       0.410521   -9999.000000       0.379900   -9999.000000   -9999.000000
57778     57778     hunan          112.9497       27.1000          132       172     2012      05        31        152              0.000000      23.626648       6.027485       0.404812   -9999.000000       0.244900       0.147700   -9999.000000
57778     57778     hunan          112.9497       27.1000          132       172     2012      06        01        153              0.000000      24.584808       8.293788       0.403928       0.450500   -9999.000000       0.146200       0.974000
57778     57778     hunan          112.9497       27.1000          132       172     2012      06        02        154              0.000000      22.277252       0.000000       0.411996       0.388500       0.465100       0.141300   -9999.000000
57778     57778     hunan          112.9497       27.1000          132       172     2012      06        03        155              0.000000      23.102783       6.132476       0.403920       0.424500   -9999.000000   -9999.000000       1.000000
57778     57778     hunan          112.9497       27.1000          132       172     2012      06        04        156              0.000000      23.754303       0.923866       0.406201       0.446000   -9999.000000   -9999.000000   -9999.000000
57778     57778     hunan          112.9497       27.1000          132       172     2012      06        05        157              0.000000      22.830811       2.797931       0.406024   -9999.000000       0.257900       0.100100       0.639000
57778     57778     hunan          112.9497       27.1000          132       172     2012      06        06        158              0.000000      24.340027       1.568914       0.404223       0.371000   -9999.000000       0.106100       0.944000
57778     57778     hunan          112.9497       27.1000          132       172     2012      06        07        159              0.000000      26.223358       1.049715       0.405523       0.377000       0.273300       0.113100       0.562000
57778     57778     hunan          112.9497       27.1000          132       172     2012      06        08        160              0.000000      27.674835       0.504387       0.402179       0.354500   -9999.000000   -9999.000000       0.587000
57778     57778     hunan          112.9497       27.1000          132       172     2012      06        09        161              0.000000      28.422607       6.285099       0.399936       0.317000       0.275800   -9999.000000   -9999.000000
57778     57778     hunan          112.9497       27.1000          132       172     2012      06        10        162              0.000000      29.820831      21.785231       0.403222   -9999.000000       0.494800   -9999.000000       0.782000
57778     57778     hunan          112.9497       27.1000          132       172     2012      06        11        163              0.000000      29.173279       6.564711       0.413091       0.305000   -9999.000000       0.106600   -9999.000000
57778     57778     hunan          112.9497       27.1000          132       172     2012      06        12        164              0.000000      26.236023       0.000000       0.413998       0.270000       0.337000       0.108500       0.601000
57778     57778     hunan          112.9497       27.1000          132       172     2012      06        13        165              0.000000      28.233154       1.026132       0.404935       0.273500   -9999.000000       0.105400       0.658000
57778     57778     hunan          112.9497       27.1000          132       172     2012      06        14        166              0.000000      29.584564       0.916345       0.402861       0.274500       0.354300   -9999.000000   -9999.000000
57778     57778     hunan          112.9497       27.1000          132       172     2012      06        15        167              0.000000      28.719330       0.711115       0.400838   -9999.000000       0.387600   -9999.000000       0.379000
57778     57778     hunan          112.9497       27.1000          132       172     2012      06        16        168              0.000000      28.669525       0.507178       0.398126   -9999.000000   -9999.000000   -9999.000000   -9999.000000
57778     57778     hunan          112.9497       27.1000          132       172     2012      06        17        169              0.000000      28.831696      23.029314       0.396345       0.280500       0.475700       0.097400       0.859000
57778     57778     hunan          112.9497       27.1000          132       172     2012      06        18        170              0.000000      27.532257       3.430646       0.416746       0.232000       0.397700       0.092100       0.764000
57778     57778     hunan          112.9497       27.1000          132       172     2012      06        19        171              0.000000      28.561859       1.643658       0.405500       0.243000       0.356000       0.089600   -9999.000000
57778     57778     hunan          112.9497       27.1000          132       172     2012      06        20        172              0.000000      29.197113       0.000000       0.399642   -9999.000000       0.375000   -9999.000000       0.317000
57778     57778     hunan          112.9497       27.1000          132       172     2012      06        21        173              0.000000      29.774750       0.780380       0.396477   -9999.000000   -9999.000000   -9999.000000   -9999.000000
57778     57778     hunan          112.9497       27.1000          132       172     2012      06        22        174              0.000000      30.022034       0.478721       0.394862       0.268000       0.585600       0.082300       0.434000
57778     57778     hunan          112.9497       27.1000          132       172     2012      06        23        175              0.000000      28.211182       3.033938       0.394850       0.294000       0.551200       0.087900   -9999.000000
57778     57778     hunan          112.9497       27.1000          132       172     2012      06        24        176              0.000000      26.125610      13.733064       0.398025       0.271500   -9999.000000       0.091100       0.859000
57778     57778     hunan          112.9497       27.1000          132       172     2012      06        25        177              0.000000      28.796234       3.698207       0.405188       0.248000       0.378600   -9999.000000       0.662000
57778     57778     hunan          112.9497       27.1000          132       172     2012      06        26        178              0.000000      28.401367      10.720311       0.402680   -9999.000000   -9999.000000   -9999.000000   -9999.000000
57778     57778     hunan          112.9497       27.1000          132       172     2012      06        27        179              0.000000      28.206573      11.886947       0.406247       0.284000       0.399500   -9999.000000       0.713000
57778     57778     hunan          112.9497       27.1000          132       172     2012      06        28        180              0.000000      29.139862       1.717960       0.413536       0.265500       0.411800       0.102000   -9999.000000
57778     57778     hunan          112.9497       27.1000          132       172     2012      06        29        181              0.000000      30.280579       5.017914       0.405588       0.240000   -9999.000000       0.103000   -9999.000000
57778     57778     hunan          112.9497       27.1000          132       172     2012      06        30        182              0.000000      31.282776       0.332741       0.402371       0.211000       0.349300       0.104700   -9999.000000
57778     57778     hunan          112.9497       27.1000          132       172     2012      07        01        183              0.000000      30.191040       0.000000       0.396973   -9999.000000   -9999.000000   -9999.000000   -9999.000000
57778     57778     hunan          112.9497       27.1000          132       172     2012      07        02        184              0.000000      29.702728       0.000000       0.391981   -9999.000000       0.259200   -9999.000000       0.329000
57778     57778     hunan          112.9497       27.1000          132       172     2012      07        03        185              0.000000      29.627472       0.000000       0.389281       0.284000       0.425800       0.129600   -9999.000000
57778     57778     hunan          112.9497       27.1000          132       172     2012      07        04        186              0.000000      29.995178       0.000000       0.386887       0.251000   -9999.000000       0.125400       0.328000
57778     57778     hunan          112.9497       27.1000          132       172     2012      07        05        187              0.000000      30.346344      24.184673       0.384131       0.243000       0.269800       0.132000       0.413000
57778     57778     hunan          112.9497       27.1000          132       172     2012      07        06        188              0.000000      30.810394      12.180282       0.382115   -9999.000000       0.304500       0.129300       0.124000
57778     57778     hunan          112.9497       27.1000          132       172     2012      07        07        189              0.000000      30.745209       0.000000       0.379610   -9999.000000       0.246300   -9999.000000       0.222000
57778     57778     hunan          112.9497       27.1000          132       172     2012      07        08        190              0.000000      30.199219       0.000000       0.377233       0.274000       0.317300   -9999.000000   -9999.000000
57778     57778     hunan          112.9497       27.1000          132       172     2012      07        09        191              0.000000      30.402588       2.528017       0.375311       0.276000   -9999.000000       0.135200       0.215000
57778     57778     hunan          112.9497       27.1000          132       172     2012      07        10        192              0.000000      30.534760       0.000000       0.373716       0.266000       0.352900       0.150300   -9999.000000
57778     57778     hunan          112.9497       27.1000          132       172     2012      07        11        193              0.000000      30.589417       0.000000       0.372537       0.204000       0.329000       0.147700       0.287000
57778     57778     hunan          112.9497       27.1000          132       172     2012      07        12        194              0.000000      30.873596       5.641821       0.371061   -9999.000000   -9999.000000   -9999.000000       0.303000
57778     57778     hunan          112.9497       27.1000          132       172     2012      07        13        195              0.000000      30.747803       0.158190       0.369469       0.267000       0.230600   -9999.000000   -9999.000000
57778     57778     hunan          112.9497       27.1000          132       172     2012      07        14        196              0.000000      30.327667      39.555378       0.367454       0.296000   -9999.000000   -9999.000000       0.702000
57778     57778     hunan          112.9497       27.1000          132       172     2012      07        15        197              0.000000      28.391724       3.403607       0.426109       0.304500       0.367000       0.154900   -9999.000000
57778     57778     hunan          112.9497       27.1000          132       172     2012      07        16        198              0.000000      28.125397      13.153929       0.410788       0.273000       0.510200       0.199300       1.000000
57778     57778     hunan          112.9497       27.1000          132       172     2012      07        17        199              0.000000      28.140869       2.586309       0.407883   -9999.000000   -9999.000000       0.212700       0.915000
57778     57778     hunan          112.9497       27.1000          132       172     2012      07        18        200              0.000000      28.328644      12.237328       0.402156   -9999.000000       0.370300   -9999.000000   -9999.000000
57778     57778     hunan          112.9497       27.1000          132       172     2012      07        19        201              0.000000      29.083527       0.206982       0.406920       0.302000   -9999.000000   -9999.000000       0.405000
57778     57778     hunan          112.9497       27.1000          132       172     2012      07        20        202              0.000000      29.533051       2.957876       0.396476       0.257500       0.454200       0.203000   -9999.000000
57778     57778     hunan          112.9497       27.1000          132       172     2012      07        21        203              0.000000      30.546143       9.081460       0.393914       0.256500       0.647100       0.188100       0.446000
57778     57778     hunan          112.9497       27.1000          132       172     2012      07        22        204              0.000000      31.617188       0.491199       0.388515   -9999.000000   -9999.000000       0.200200   -9999.000000
57778     57778     hunan          112.9497       27.1000          132       172     2012      07        23        205              0.000000      31.510040       2.330947       0.385964   -9999.000000       0.376400       0.161100       0.327000
57778     57778     hunan          112.9497       27.1000          132       172     2012      07        24        206              0.000000      30.605133       1.036005       0.385883       0.279000   -9999.000000   -9999.000000       0.505000
57778     57778     hunan          112.9497       27.1000          132       172     2012      07        25        207              0.000000      28.845032      10.696809       0.386061       0.268500       0.242800   -9999.000000   -9999.000000
57778     57778     hunan          112.9497       27.1000          132       172     2012      07        26        208              0.000000      30.397400       0.558018       0.381368       0.256500       0.407000       0.157500       0.362000
57778     57778     hunan          112.9497       27.1000          132       172     2012      07        27        209              0.000000      30.364319       7.578898       0.379622       0.218000   -9999.000000       0.177800   -9999.000000
57778     57778     hunan          112.9497       27.1000          132       172     2012      07        28        210              0.000000      30.291138       0.728636       0.387312   -9999.000000       0.552100       0.165000       0.362000
57778     57778     hunan          112.9497       27.1000          132       172     2012      07        29        211              0.000000      30.817078       4.890869       0.384978   -9999.000000       0.633900   -9999.000000       0.524000
57778     57778     hunan          112.9497       27.1000          132       172     2012      07        30        212              0.000000      31.411957       0.371271       0.379829       0.249000   -9999.000000   -9999.000000   -9999.000000
57778     57778     hunan          112.9497       27.1000          132       172     2012      07        31        213              0.000000      31.323151       1.435522       0.377542       0.227000       0.327300   -9999.000000       0.275000
57778     57778     hunan          112.9497       27.1000          132       172     2012      08        01        214              0.000000      31.739929       1.559775       0.375009       0.238500   -9999.000000       0.168100   -9999.000000
57778     57778     hunan          112.9497       27.1000          132       172     2012      08        02        215              0.000000      31.097015       1.029258       0.374256   -9999.000000       0.239700       0.167300       0.241000
57778     57778     hunan          112.9497       27.1000          132       172     2012      08        03        216              0.000000      30.892029       2.265304       0.372889   -9999.000000       0.299000       0.174900       0.300000
57778     57778     hunan          112.9497       27.1000          132       172     2012      08        04        217              0.000000      29.987213      24.081110       0.372012       0.325000   -9999.000000   -9999.000000       0.982000
57778     57778     hunan          112.9497       27.1000          132       172     2012      08        05        218              0.000000      27.410095       1.296370       0.401935       0.286500       0.237700   -9999.000000       0.390000
57778     57778     hunan          112.9497       27.1000          132       172     2012      08        06        219              0.000000      27.211884       3.686744       0.392384       0.260000   -9999.000000       0.139100   -9999.000000
57778     57778     hunan          112.9497       27.1000          132       172     2012      08        07        220              0.000000      29.169250       0.331435       0.389999       0.241000       0.264000       0.125200       0.405000
57778     57778     hunan          112.9497       27.1000          132       172     2012      08        08        221              0.000000      30.276825       0.000000       0.382815   -9999.000000       0.373900       0.127300   -9999.000000
57778     57778     hunan          112.9497       27.1000          132       172     2012      08        09        222              0.000000      30.096680       0.556228       0.377976   -9999.000000   -9999.000000   -9999.000000       0.446000
57778     57778     hunan          112.9497       27.1000          132       172     2012      08        10        223              0.000000      29.805420       0.636760       0.377183       0.257000       0.231600   -9999.000000       0.399000
57778     57778     hunan          112.9497       27.1000          132       172     2012      08        11        224              0.000000      30.140137       0.375335       0.375448       0.250500   -9999.000000   -9999.000000   -9999.000000
57778     57778     hunan          112.9497       27.1000          132       172     2012      08        12        225              0.000000      30.590851       1.501108       0.373526       0.250000       0.214700       0.115200       0.337000
57778     57778     hunan          112.9497       27.1000          132       172     2012      08        13        226              0.000000      30.586884       4.028652       0.373159   -9999.000000       0.245500       0.181900   -9999.000000
57778     57778     hunan          112.9497       27.1000          132       172     2012      08        14        227              0.000000      30.541779       0.831415       0.377869   -9999.000000   -9999.000000       0.188500       0.335000
57778     57778     hunan          112.9497       27.1000          132       172     2012      08        15        228              0.000000      30.840424       0.162020       0.374462       0.250500       0.342500   -9999.000000       0.311000
57778     57778     hunan          112.9497       27.1000          132       172     2012      08        16        229              0.000000      31.149445       0.569793       0.369880       0.236000       0.486000   -9999.000000   -9999.000000
57778     57778     hunan          112.9497       27.1000          132       172     2012      08        17        230              0.000000      31.459381       0.879706       0.368417       0.246500   -9999.000000   -9999.000000       0.135000
57778     57778     hunan          112.9497       27.1000          132       172     2012      08        18        231              0.000000      31.430328       0.415840       0.365288   -9999.000000       0.164600       0.168600   -9999.000000
57778     57778     hunan          112.9497       27.1000          132       172     2012      08        19        232              0.000000      31.656525       3.081435       0.362087   -9999.000000   -9999.000000       0.166400       0.369000
57778     57778     hunan          112.9497       27.1000          132       172     2012      08        20        233              0.000000      31.819061       0.917100       0.360255       0.244000       0.357300       0.106000   -9999.000000
57778     57778     hunan          112.9497       27.1000          132       172     2012      08        21        234              0.000000      31.650330       1.342888       0.360051       0.285500       0.224400   -9999.000000   -9999.000000
57778     57778     hunan          112.9497       27.1000          132       172     2012      08        22        235              0.000000      29.358704       5.989002       0.358513       0.332500   -9999.000000   -9999.000000   -9999.000000
57778     57778     hunan          112.9497       27.1000          132       172     2012      08        23        236              0.000000      25.560669       0.632221       0.370925       0.336000       0.457800       0.126400   -9999.000000
57778     57778     hunan          112.9497       27.1000          132       172     2012      08        24        237              0.000000      24.368439      13.228283       0.372075   -9999.000000   -9999.000000       0.111600       0.496000
57778     57778     hunan          112.9497       27.1000          132       172     2012      08        25        238              0.000000      25.676208      15.481246       0.369870   -9999.000000   -9999.000000       0.112500   -9999.000000
57778     57778     hunan          112.9497       27.1000          132       172     2012      08        26        239              0.000000      26.902588       0.720255       0.367025       0.284500       0.351200   -9999.000000       0.328000
57778     57778     hunan          112.9497       27.1000          132       172     2012      08        27        240              0.000000      28.481659       0.428048       0.364543       0.257000   -9999.000000   -9999.000000       0.386000
57778     57778     hunan          112.9497       27.1000          132       172     2012      08        28        241              0.000000      27.384247       1.652452       0.363364       0.266000       0.232700   -9999.000000   -9999.000000
57778     57778     hunan          112.9497       27.1000          132       172     2012      08        29        242              0.000000      28.567474       5.625563       0.361760   -9999.000000   -9999.000000       0.147900       0.249000
57778     57778     hunan          112.9497       27.1000          132       172     2012      08        30        243              0.000000      29.539795       0.535593       0.357787   -9999.000000       0.271600       0.159000   -9999.000000
57778     57778     hunan          112.9497       27.1000          132       172     2012      08        31        244              0.000000      29.704712       2.238179       0.354906       0.267000       0.223200       0.158800       0.266000
57778     57778     hunan          112.9497       27.1000          132       172     2012      09        01        245              0.000000      30.488647       0.357667       0.355710       0.233500   -9999.000000   -9999.000000       0.440000
57778     57778     hunan          112.9497       27.1000          132       172     2012      09        02        246              0.000000      30.866852       6.096016       0.351455       0.232000       0.286800   -9999.000000       0.409000
57778     57778     hunan          112.9497       27.1000          132       172     2012      09        03        247              0.000000      29.575165       0.833054       0.358715       0.303000       0.362500       0.136600       0.357000
57778     57778     hunan          112.9497       27.1000          132       172     2012      09        04        248              0.000000      25.542053       1.900037       0.366104   -9999.000000   -9999.000000       0.130100   -9999.000000
57778     57778     hunan          112.9497       27.1000          132       172     2012      09        05        249              0.000000      26.788788       1.787906       0.361049       0.256000       0.379300       0.139600       0.160000
57778     57778     hunan          112.9497       27.1000          132       172     2012      09        06        250              0.000000      27.003876       4.038821       0.356906       0.248500   -9999.000000       0.135600   -9999.000000
57778     57778     hunan          112.9497       27.1000          132       172     2012      09        07        251              0.000000      28.564240       1.789281       0.355142       0.255500       0.252200   -9999.000000       0.304000
57778     57778     hunan          112.9497       27.1000          132       172     2012      09        08        252              0.000000      29.072144       4.192257       0.354843       0.244500       0.527600   -9999.000000       0.319000
57778     57778     hunan          112.9497       27.1000          132       172     2012      09        09        253              0.000000      29.117432       1.068927       0.354212   -9999.000000   -9999.000000       0.130100   -9999.000000
57778     57778     hunan          112.9497       27.1000          132       172     2012      09        10        254              0.000000      27.726288       5.599679       0.350985   -9999.000000       0.167400       0.157900       0.257000
57778     57778     hunan          112.9497       27.1000          132       172     2012      09        11        255              0.000000      27.397156       2.116847       0.352135       0.215500   -9999.000000       0.148500   -9999.000000
57778     57778     hunan          112.9497       27.1000          132       172     2012      09        12        256              0.000000      29.183838       4.660653       0.354301       0.204500       0.292700   -9999.000000       0.338000
57778     57778     hunan          112.9497       27.1000          132       172     2012      09        13        257              0.000000      26.719788       0.257703       0.360835       0.228500       0.239100   -9999.000000       0.343000
57778     57778     hunan          112.9497       27.1000          132       172     2012      09        14        258              0.000000      22.358246       2.752730       0.360872   -9999.000000   -9999.000000   -9999.000000   -9999.000000
57778     57778     hunan          112.9497       27.1000          132       172     2012      09        15        259              0.000000      22.792358       3.104119       0.357207   -9999.000000       0.222500       0.144000       0.060000
57778     57778     hunan          112.9497       27.1000          132       172     2012      09        16        260              0.000000      23.153351       0.641447       0.352456       0.205000   -9999.000000       0.158700   -9999.000000
57778     57778     hunan          112.9497       27.1000          132       172     2012      09        17        261              0.000000      23.564545       0.871603       0.350323       0.210000       0.181800       0.136100       0.208000
57778     57778     hunan          112.9497       27.1000          132       172     2012      09        18        262              0.000000      23.106171       0.485423       0.349547       0.193000       0.231100   -9999.000000   -9999.000000
57778     57778     hunan          112.9497       27.1000          132       172     2012      09        19        263              0.000000      24.244263       0.000000       0.347032       0.190000   -9999.000000   -9999.000000       0.318000
57778     57778     hunan          112.9497       27.1000          132       172     2012      09        20        264              0.000000      25.231873      17.050898       0.344510   -9999.000000       0.251500       0.148400       0.294000
57778     57778     hunan          112.9497       27.1000          132       172     2012      09        21        265              0.000000      24.298065       6.150649       0.365631   -9999.000000   -9999.000000       0.160000   -9999.000000
57778     57778     hunan          112.9497       27.1000          132       172     2012      09        22        266              0.000000      24.021820       2.518668       0.387192       0.276000   -9999.000000       0.158400       0.888000
57778     57778     hunan          112.9497       27.1000          132       172     2012      09        23        267              0.000000      23.064423      18.978277       0.382925       0.279000       0.341200       0.150400   -9999.000000
57778     57778     hunan          112.9497       27.1000          132       172     2012      09        24        268              0.000000      22.852814       4.151518       0.405903       0.284500   -9999.000000   -9999.000000       0.788000
57778     57778     hunan          112.9497       27.1000          132       172     2012      09        25        269              0.000000      23.002594       1.803611       0.397339   -9999.000000       0.627000   -9999.000000       0.698000
57778     57778     hunan          112.9497       27.1000          132       172     2012      09        26        270              0.000000      24.814178       0.231469       0.386283   -9999.000000       0.370200       0.149400   -9999.000000
57778     57778     hunan          112.9497       27.1000          132       172     2012      09        27        271              0.000000      24.746033       0.416690       0.381492       0.219000   -9999.000000       0.157200       0.566000
57778     57778     hunan          112.9497       27.1000          132       172     2012      09        28        272              0.000000      24.359894       1.227373       0.378159       0.211000   -9999.000000       0.149600   -9999.000000
57778     57778     hunan          112.9497       27.1000          132       172     2012      09        29        273              0.000000      23.462708       0.401438       0.375663       0.209500   -9999.000000   -9999.000000       0.186000
57778     57778     hunan          112.9497       27.1000          132       172     2012      09        30        274              0.000000      22.215393       0.816577       0.371425       0.197000   -9999.000000   -9999.000000       0.443000
57778     57778     hunan          112.9497       27.1000          132       172     2012      10        01        275              0.000000      22.317108       1.108863       0.368919   -9999.000000   -9999.000000   -9999.000000       0.218000
57778     57778     hunan          112.9497       27.1000          132       172     2012      10        02        276              0.000000      22.495605       0.338178       0.366345       0.157000   -9999.000000       0.126800       0.326000
57778     57778     hunan          112.9497       27.1000          132       172     2012      10        03        277              0.000000      23.162018       0.000000       0.364551       0.170500       0.241900       0.143400   -9999.000000
57778     57778     hunan          112.9497       27.1000          132       172     2012      10        04        278              0.000000      21.809326       0.300539       0.364393       0.181000   -9999.000000       0.145400       0.271000
57778     57778     hunan          112.9497       27.1000          132       172     2012      10        05        279              0.000000      21.168121       0.431165       0.365170       0.191000       0.165800   -9999.000000   -9999.000000
57778     57778     hunan          112.9497       27.1000          132       172     2012      10        06        280              0.000000      20.557281       0.320177       0.364590   -9999.000000       0.428500   -9999.000000       0.336000
57778     57778     hunan          112.9497       27.1000          132       172     2012      10        07        281              0.000000      19.821838       1.542180       0.365213   -9999.000000   -9999.000000       0.139600       0.417000
57778     57778     hunan          112.9497       27.1000          132       172     2012      10        08        282              0.000000      22.082184       0.805823       0.365365       0.174500       0.397600       0.107600   -9999.000000
57778     57778     hunan          112.9497       27.1000          132       172     2012      10        09        283              0.000000      22.078644       0.591725       0.363966       0.167000   -9999.000000       0.100800       0.180000
57778     57778     hunan          112.9497       27.1000          132       172     2012      10        10        284              0.000000      20.337250       0.630965       0.365091       0.167500       0.155400       0.097700   -9999.000000
57778     57778     hunan          112.9497       27.1000          132       172     2012      10        11        285              0.000000      21.931946       0.424709       0.362307       0.137000       0.176600   -9999.000000       0.262000
57778     57778     hunan          112.9497       27.1000          132       172     2012      10        12        286              0.314000      22.017273       1.072748       0.360143   -9999.000000   -9999.000000   -9999.000000       0.435000
57778     57778     hunan          112.9497       27.1000          132       172     2012      10        13        287              0.314000      22.468292       0.815403       0.359129       0.154000       0.128400       0.101500   -9999.000000
57778     57778     hunan          112.9497       27.1000          132       172     2012      10        14        288              0.314000      22.360779       1.097485       0.357489       0.157500       0.103400       0.112000       0.157000
57778     57778     hunan          112.9497       27.1000          132       172     2012      10        15        289              0.314000      21.203369       0.862067       0.357554       0.147000   -9999.000000       0.145700   -9999.000000
57778     57778     hunan          112.9497       27.1000          132       172     2012      10        16        290              0.314292      22.477295       2.708485       0.358765       0.152000       0.311700   -9999.000000       0.857000
57778     57778     hunan          112.9497       27.1000          132       172     2012      10        17        291              0.315000      21.795715       2.904008       0.363444   -9999.000000   -9999.000000   -9999.000000   -9999.000000
57778     57778     hunan          112.9497       27.1000          132       172     2012      10        18        292              0.314958      19.880280      95.800674       0.359605   -9999.000000       0.430500   -9999.000000       0.155000
57778     57778     hunan          112.9497       27.1000          132       172     2012      10        19        293              0.314375      20.406616       0.412847       0.357004       0.146000       0.521100       0.129600       0.439000
57778     57778     hunan          112.9497       27.1000          132       172     2012      10        20        294              0.314000      22.086182       0.285383       0.355660       0.136500   -9999.000000       0.129500   -9999.000000
57778     57778     hunan          112.9497       27.1000          132       172     2012      10        21        295              0.314000      24.402863       1.014599       0.354044       0.161000       0.296600       0.141700       0.401000
57778     57778     hunan          112.9497       27.1000          132       172     2012      10        22        296              0.314000      24.671936       0.306355       0.353120   -9999.000000   -9999.000000   -9999.000000   -9999.000000
57778     57778     hunan          112.9497       27.1000          132       172     2012      10        23        297              0.314000      19.474396       0.343186       0.353745   -9999.000000       0.301200   -9999.000000       0.201000
57778     57778     hunan          112.9497       27.1000          132       172     2012      10        24        298              0.314000      18.606720       0.000000       0.354718   -9999.000000       0.520200       0.099700       0.491000
57778     57778     hunan          112.9497       27.1000          132       172     2012      10        25        299              0.000000      20.009735       0.000000       0.353212       0.169000   -9999.000000       0.100800   -9999.000000
57778     57778     hunan          112.9497       27.1000          132       172     2012      10        26        300              0.314000      21.082794       0.000000       0.351833       0.169500       0.285300       0.114800       0.406000
57778     57778     hunan          112.9497       27.1000          132       172     2012      10        27        301              0.314000      21.968658       1.654367       0.350178       0.166000       0.237600   -9999.000000   -9999.000000
57778     57778     hunan          112.9497       27.1000          132       172     2012      10        28        302              0.000000      20.953705       3.954758       0.352284   -9999.000000       0.099300   -9999.000000       0.424000
57778     57778     hunan          112.9497       27.1000          132       172     2012      10        29        303              0.315458      20.098846       8.695431       0.364581       0.215000       0.306200   -9999.000000       0.827000
57778     57778     hunan          112.9497       27.1000          132       172     2012      10        30        304              0.315333      19.827759       0.562115       0.379231       0.192000   -9999.000000       0.139800       0.387000
57778     57778     hunan          112.9497       27.1000          132       172     2012      10        31        305              0.315000      17.705597       1.123431       0.374078       0.178000       0.324800       0.150400       0.377000
57778     57778     hunan          112.9497       27.1000          132       172     2012      11        01        306              0.315000      17.974854       1.636363       0.367874       0.162000       0.343600       0.158100   -9999.000000
57778     57778     hunan          112.9497       27.1000          132       172     2012      11        02        307              0.315000      17.247314       1.252675       0.367962   -9999.000000   -9999.000000   -9999.000000       0.352000
57778     57778     hunan          112.9497       27.1000          132       172     2012      11        03        308              0.315000      18.343445       0.851763       0.366123   -9999.000000       0.254700   -9999.000000   -9999.000000
57778     57778     hunan          112.9497       27.1000          132       172     2012      11        04        309              0.315000      16.698730       3.259128       0.366308       0.173500   -9999.000000   -9999.000000       0.339000
57778     57778     hunan          112.9497       27.1000          132       172     2012      11        05        310              0.315000      16.977020       2.118034       0.366908       0.175000       0.380800       0.125000       0.403000
57778     57778     hunan          112.9497       27.1000          132       172     2012      11        06        311              0.315000      16.883148       4.765636       0.366199       0.184000       0.268700       0.112200   -9999.000000
57778     57778     hunan          112.9497       27.1000          132       172     2012      11        07        312              0.315958      16.567413      26.123329       0.371525       0.245000   -9999.000000       0.131300       0.857000
57778     57778     hunan          112.9497       27.1000          132       172     2012      11        08        313              0.316095      14.768829      23.239485       0.406223   -9999.000000       0.370400   -9999.000000   -9999.000000
57778     57778     hunan          112.9497       27.1000          132       172     2012      11        09        314              0.316375      13.786072      24.911238       0.428286   -9999.000000   -9999.000000   -9999.000000       1.000000
57778     57778     hunan          112.9497       27.1000          132       172     2012      11        10        315              0.316208      13.985443       1.743025       0.440195   -9999.000000       0.387500       0.131600       1.000000
57778     57778     hunan          112.9497       27.1000          132       172     2012      11        11        316              0.316000      13.427490       1.489429       0.434652       0.159000       0.349900       0.136900   -9999.000000
57778     57778     hunan          112.9497       27.1000          132       172     2012      11        12        317              0.316000      14.548889       0.535861       0.410315       0.163000   -9999.000000       0.140400       0.455000
57778     57778     hunan          112.9497       27.1000          132       172     2012      11        13        318              0.000000      14.461945       3.131341       0.394906   -9999.000000       0.427300   -9999.000000   -9999.000000
57778     57778     hunan          112.9497       27.1000          132       172     2012      11        14        319              0.316000      15.859406      12.407117       0.391332   -9999.000000       0.341400   -9999.000000       0.876000
57778     57778     hunan          112.9497       27.1000          132       172     2012      11        15        320              0.316083      15.689423       4.800873       0.397087       0.202500       0.428100   -9999.000000   -9999.000000
57778     57778     hunan          112.9497       27.1000          132       172     2012      11        16        321              0.316167      14.025055      15.143618       0.404289   -9999.000000       0.453800       0.135300       0.929000
57778     57778     hunan          112.9497       27.1000          132       172     2012      11        17        322              0.000000      11.113739       3.465598       0.413402   -9999.000000   -9999.000000       0.136100       0.713000
57778     57778     hunan          112.9497       27.1000          132       172     2012      11        18        323              0.316000      11.173401       0.986266       0.400869   -9999.000000       0.420400       0.138700   -9999.000000
57778     57778     hunan          112.9497       27.1000          132       172     2012      11        19        324              0.316000      11.741333       1.275105       0.394671   -9999.000000       0.326600   -9999.000000       0.641000
57778     57778     hunan          112.9497       27.1000          132       172     2012      11        20        325              0.316000      12.952637       3.713731       0.393463       0.185000   -9999.000000   -9999.000000   -9999.000000
57778     57778     hunan          112.9497       27.1000          132       172     2012      11        21        326              0.316125      13.935516       3.552729       0.393065       0.190500       0.489900       0.123900       0.874000
57778     57778     hunan          112.9497       27.1000          132       172     2012      11        22        327              0.316000      12.696167       6.211380       0.399499       0.198000   -9999.000000       0.115700       0.923000
57778     57778     hunan          112.9497       27.1000          132       172     2012      11        23        328              0.316000      11.920502      24.077848       0.400845   -9999.000000       0.359500       0.118000   -9999.000000
57778     57778     hunan          112.9497       27.1000          132       172     2012      11        24        329              0.316000      11.049530       0.542549       0.393402   -9999.000000       0.202600       0.115400       0.752000
57778     57778     hunan          112.9497       27.1000          132       172     2012      11        25        330              0.316000      11.870941       3.081712       0.390674       0.196000   -9999.000000   -9999.000000   -9999.000000
57778     57778     hunan          112.9497       27.1000          132       172     2012      11        26        331              0.316000      10.861633       0.315589       0.394104       0.164000       0.487800   -9999.000000       0.468000
57778     57778     hunan          112.9497       27.1000          132       172     2012      11        27        332              0.316000      11.382690       0.976985       0.389577       0.179500   -9999.000000       0.110200       0.403000
57778     57778     hunan          112.9497       27.1000          132       172     2012      11        28        333              0.316000      11.204529       0.081730       0.388415   -9999.000000       0.364800       0.102800       0.539000
57778     57778     hunan          112.9497       27.1000          132       172     2012      11        29        334              0.316000      10.853394       1.006324       0.388147   -9999.000000       0.466800       0.109400       0.530000
57778     57778     hunan          112.9497       27.1000          132       172     2012      11        30        335              0.316000      11.080902       9.379058       0.387661   -9999.000000   -9999.000000   -9999.000000   -9999.000000
57778     57778     hunan          112.9497       27.1000          132       172     2012      12        01        336              0.316000       9.862091       2.313123       0.395349       0.225000       0.461800   -9999.000000       0.509000
57778     57778     hunan          112.9497       27.1000          132       172     2012      12        02        337              0.316000       9.377014       3.769000       0.398105   -9999.000000       0.337000   -9999.000000   -9999.000000
57778     57778     hunan          112.9497       27.1000          132       172     2012      12        03        338              0.316000       8.461975       3.013665       0.392136   -9999.000000       0.305700       0.116000       0.414000
57778     57778     hunan          112.9497       27.1000          132       172     2012      12        04        339              0.316000       9.176117       3.315164       0.390013   -9999.000000       0.394600       0.109900       0.493000
57778     57778     hunan          112.9497       27.1000          132       172     2012      12        05        340              0.316000       9.364227       1.192561       0.388392   -9999.000000   -9999.000000       0.115400   -9999.000000
57778     57778     hunan          112.9497       27.1000          132       172     2012      12        06        341              0.316000      10.632202       2.599093       0.387256   -9999.000000       0.387500   -9999.000000       0.542000
57778     57778     hunan          112.9497       27.1000          132       172     2012      12        07        342              0.316000      11.346649       0.941995       0.386152       0.167000       0.287800   -9999.000000   -9999.000000
57778     57778     hunan          112.9497       27.1000          132       172     2012      12        08        343              0.316000      12.500549       3.540940       0.385452       0.162000   -9999.000000       0.106700       0.462000
57778     57778     hunan          112.9497       27.1000          132       172     2012      12        09        344              0.316000      12.333038       8.680824       0.384614       0.178000       0.233900       0.113600       0.441000
57778     57778     hunan          112.9497       27.1000          132       172     2012      12        10        345              0.316000       9.487732       7.236786       0.392082   -9999.000000   -9999.000000       0.101900   -9999.000000
57778     57778     hunan          112.9497       27.1000          132       172     2012      12        11        346              0.316000       7.609680       7.198378       0.402711   -9999.000000       0.678400   -9999.000000       0.372000
57778     57778     hunan          112.9497       27.1000          132       172     2012      12        12        347              0.316000       7.426605       0.952007       0.393480       0.188000       0.478800   -9999.000000   -9999.000000
57778     57778     hunan          112.9497       27.1000          132       172     2012      12        13        348              0.316000       7.765442       0.713638       0.392497       0.177500   -9999.000000   -9999.000000       0.771000
57778     57778     hunan          112.9497       27.1000          132       172     2012      12        14        349              0.316000      11.573395      31.897921       0.390742       0.185000       0.462600       0.085800   -9999.000000
57778     57778     hunan          112.9497       27.1000          132       172     2012      12        15        350              0.000000      10.554962       1.035694       0.389361   -9999.000000   -9999.000000       0.086700       0.518000
57778     57778     hunan          112.9497       27.1000          132       172     2012      12        16        351              0.316000       8.293884       2.419150       0.389353   -9999.000000       0.356000       0.093400       0.489000
57778     57778     hunan          112.9497       27.1000          132       172     2012      12        17        352              0.316000       8.169281       7.953485       0.388565   -9999.000000       0.436200   -9999.000000   -9999.000000
57778     57778     hunan          112.9497       27.1000          132       172     2012      12        18        353              0.316000       7.244263      10.119725       0.398725   -9999.000000   -9999.000000   -9999.000000       0.595000
57778     57778     hunan          112.9497       27.1000          132       172     2012      12        19        354              0.316000       5.988342       2.049593       0.393757       0.214000       0.415100   -9999.000000   -9999.000000
57778     57778     hunan          112.9497       27.1000          132       172     2012      12        20        355              0.000000       6.610626       8.377576       0.392892       0.239000   -9999.000000       0.093500       0.859000
57778     57778     hunan          112.9497       27.1000          132       172     2012      12        21        356              0.316000       5.817627       2.633930       0.402087   -9999.000000       0.402100       0.089800       0.480000
57778     57778     hunan          112.9497       27.1000          132       172     2012      12        22        357              0.316000       4.687286       3.078167       0.396707   -9999.000000       0.297400       0.093500   -9999.000000
57778     57778     hunan          112.9497       27.1000          132       172     2012      12        23        358              0.316000       4.523560       2.303313       0.394638   -9999.000000   -9999.000000   -9999.000000       0.306000
57778     57778     hunan          112.9497       27.1000          132       172     2012      12        24        359              0.316000       5.268951       1.050683       0.393359   -9999.000000       0.214500   -9999.000000   -9999.000000
57778     57778     hunan          112.9497       27.1000          132       172     2012      12        25        360              0.316000       6.422119       0.526646       0.392201   -9999.000000       0.234300       0.091400       0.414000
57778     57778     hunan          112.9497       27.1000          132       172     2012      12        26        361              0.000000       4.933350      15.832670       0.391030   -9999.000000   -9999.000000       0.102300       0.194000
57778     57778     hunan          112.9497       27.1000          132       172     2012      12        27        362              0.316167       3.453918       3.350813       0.394890   -9999.000000       0.216000       0.110000       0.490000
57778     57778     hunan          112.9497       27.1000          132       172     2012      12        28        363              0.000000       3.446533       8.900096       0.402320   -9999.000000   -9999.000000   -9999.000000       0.706000
57778     57778     hunan          112.9497       27.1000          132       172     2012      12        29        364              0.000000       3.841400       7.790494       0.407549   -9999.000000   -9999.000000   -9999.000000   -9999.000000
57778     57778     hunan          112.9497       27.1000          132       172     2012      12        30        365              0.000000       2.886444       1.656706       0.410189   -9999.000000   -9999.000000   -9999.000000       0.209000
57778     57778     hunan          112.9497       27.1000          132       172     2012      12        31        366              0.316000       3.150085       0.401740       0.406171   -9999.000000   -9999.000000       0.095500   -9999.000000
