# Supplementary material for: Research on Fusing Multisatellite Soil Moisture Data Based on Bayesian Model Averaging
Source: Hindawi journal article supplement (doi:10.1155/2018/9310838), 2018-06-25
Supplement: f1 [file 9310838.f1.zip › 2012_sm00-10cm_daily_ZDB_ZHY_57781_366days_allin.txt]

57781     57781     hunan          113.5100       27.6297          129       174     2012      01        01        001              0.000000   -9999.000000       0.000000   -9999.000000       0.102000   -9999.000000       0.097800   -9999.000000
57781     57781     hunan          113.5100       27.6297          129       174     2012      01        02        002              0.298792       4.629486       2.850760       0.361757       0.129000       0.227100   -9999.000000       0.753000
57781     57781     hunan          113.5100       27.6297          129       174     2012      01        03        003              0.000000       5.228424       3.695206       0.361245   -9999.000000       0.228600   -9999.000000       0.491000
57781     57781     hunan          113.5100       27.6297          129       174     2012      01        04        004              0.336958       2.791473       0.371261       0.360890   -9999.000000   -9999.000000   -9999.000000   -9999.000000
57781     57781     hunan          113.5100       27.6297          129       174     2012      01        05        005              0.336292       4.176697       0.950510       0.355050   -9999.000000       0.233700       0.071100       0.271000
57781     57781     hunan          113.5100       27.6297          129       174     2012      01        06        006              0.337333       3.385162       0.000000       0.351832   -9999.000000   -9999.000000       0.075000   -9999.000000
57781     57781     hunan          113.5100       27.6297          129       174     2012      01        07        007              0.333958       3.718475       0.000000       0.349694       0.116000       0.314300       0.088200       0.256000
57781     57781     hunan          113.5100       27.6297          129       174     2012      01        08        008              0.000000       4.116272       0.000000       0.348294   -9999.000000       0.104100   -9999.000000       0.198000
57781     57781     hunan          113.5100       27.6297          129       174     2012      01        09        009              0.332833       3.725983       0.000000       0.347348   -9999.000000   -9999.000000   -9999.000000   -9999.000000
57781     57781     hunan          113.5100       27.6297          129       174     2012      01        10        010              0.332875       4.548553       0.000000       0.346503   -9999.000000       0.156000       0.064200       0.196000
57781     57781     hunan          113.5100       27.6297          129       174     2012      01        11        011              0.328500       4.899841       0.000000       0.345640       0.094000   -9999.000000       0.063200   -9999.000000
57781     57781     hunan          113.5100       27.6297          129       174     2012      01        12        012              0.326417       5.027802       0.110709       0.344899       0.106000       0.205900       0.060500       0.218000
57781     57781     hunan          113.5100       27.6297          129       174     2012      01        13        013              0.330500       5.500366       1.514220       0.344223       0.126000       0.101900       0.074400       0.202000
57781     57781     hunan          113.5100       27.6297          129       174     2012      01        14        014              0.373542       4.851654      17.453970       0.345830   -9999.000000   -9999.000000   -9999.000000   -9999.000000
57781     57781     hunan          113.5100       27.6297          129       174     2012      01        15        015              0.373083       4.214691      19.209597       0.361145   -9999.000000       0.334500   -9999.000000       0.785000
57781     57781     hunan          113.5100       27.6297          129       174     2012      01        16        016              0.358542       3.552795       2.407508       0.366747   -9999.000000   -9999.000000       0.062500   -9999.000000
57781     57781     hunan          113.5100       27.6297          129       174     2012      01        17        017              0.000000       3.000092       8.401498       0.361235   -9999.000000   -9999.000000       0.077800       1.000000
57781     57781     hunan          113.5100       27.6297          129       174     2012      01        18        018              0.371000       4.055695       2.210732       0.362323   -9999.000000       0.210400       0.076100   -9999.000000
57781     57781     hunan          113.5100       27.6297          129       174     2012      01        19        019              0.366083       4.123627       2.487419       0.361366   -9999.000000   -9999.000000   -9999.000000       0.511000
57781     57781     hunan          113.5100       27.6297          129       174     2012      01        20        020              0.373458       4.229980       5.723583       0.359262   -9999.000000       0.224900   -9999.000000       1.000000
57781     57781     hunan          113.5100       27.6297          129       174     2012      01        21        021              0.376708       4.573181       3.799843       0.360822   -9999.000000       0.172300   -9999.000000   -9999.000000
57781     57781     hunan          113.5100       27.6297          129       174     2012      01        22        022              0.371000       2.723480       0.242850       0.358647   -9999.000000   -9999.000000       0.063200       0.435000
57781     57781     hunan          113.5100       27.6297          129       174     2012      01        23        023              0.363083       1.553558       1.529650       0.345461   -9999.000000   -9999.000000       0.062700   -9999.000000
57781     57781     hunan          113.5100       27.6297          129       174     2012      01        24        024              0.368625       1.207947       0.541501       0.336435   -9999.000000   -9999.000000   -9999.000000       0.242000
57781     57781     hunan          113.5100       27.6297          129       174     2012      01        25        025              0.360750       1.264709       2.136295       0.328252   -9999.000000       0.099000   -9999.000000       0.296000
57781     57781     hunan          113.5100       27.6297          129       174     2012      01        26        026              0.356333       2.618042       0.290366       0.338202   -9999.000000       0.215700   -9999.000000   -9999.000000
57781     57781     hunan          113.5100       27.6297          129       174     2012      01        27        027              0.364375       2.309326       0.914395       0.344564       0.122000   -9999.000000       0.082700       0.359000
57781     57781     hunan          113.5100       27.6297          129       174     2012      01        28        028              0.366792       2.443298       0.000000       0.347760   -9999.000000       0.204400       0.062400   -9999.000000
57781     57781     hunan          113.5100       27.6297          129       174     2012      01        29        029              0.361667       3.036682       0.000000       0.347553   -9999.000000   -9999.000000       0.059400       0.420000
57781     57781     hunan          113.5100       27.6297          129       174     2012      01        30        030              0.357333       4.452637       0.000000       0.346786   -9999.000000       0.165700       0.081200       0.251000
57781     57781     hunan          113.5100       27.6297          129       174     2012      01        31        031              0.352333       3.764069       3.639279       0.345645   -9999.000000   -9999.000000   -9999.000000   -9999.000000
57781     57781     hunan          113.5100       27.6297          129       174     2012      02        01        032              0.348750       5.828552       0.111171       0.344418       0.120500   -9999.000000   -9999.000000       0.332000
57781     57781     hunan          113.5100       27.6297          129       174     2012      02        02        033              0.361083       7.230713       0.541845       0.343685   -9999.000000       0.388000       0.071900   -9999.000000
57781     57781     hunan          113.5100       27.6297          129       174     2012      02        03        034              0.366292       3.050140       0.100935       0.344134   -9999.000000   -9999.000000       0.089000       0.200000
57781     57781     hunan          113.5100       27.6297          129       174     2012      02        04        035              0.367750       3.763824       0.879684       0.343214       0.163000   -9999.000000       0.095300   -9999.000000
57781     57781     hunan          113.5100       27.6297          129       174     2012      02        05        036              0.375208       3.994934       9.265237       0.344271   -9999.000000       0.433200   -9999.000000       0.890000
57781     57781     hunan          113.5100       27.6297          129       174     2012      02        06        037              0.379583       5.256195       3.053832       0.352697       0.138000   -9999.000000   -9999.000000       0.502000
57781     57781     hunan          113.5100       27.6297          129       174     2012      02        07        038              0.374083       5.002533       1.583597       0.353669   -9999.000000       0.224400   -9999.000000   -9999.000000
57781     57781     hunan          113.5100       27.6297          129       174     2012      02        08        039              0.367583       4.027649       0.000000       0.345637   -9999.000000   -9999.000000       0.059300       0.307000
57781     57781     hunan          113.5100       27.6297          129       174     2012      02        09        040              0.362625       3.511169       0.107735       0.343219   -9999.000000   -9999.000000       0.070800   -9999.000000
57781     57781     hunan          113.5100       27.6297          129       174     2012      02        10        041              0.367583       2.495544       0.000000       0.340868   -9999.000000       0.230000       0.073100       0.353000
57781     57781     hunan          113.5100       27.6297          129       174     2012      02        11        042              0.363292       3.142761       0.000000       0.341145       0.136000   -9999.000000   -9999.000000       0.340000
57781     57781     hunan          113.5100       27.6297          129       174     2012      02        12        043              0.364500       4.565094       2.003435       0.341092       0.139000       0.112500   -9999.000000   -9999.000000
57781     57781     hunan          113.5100       27.6297          129       174     2012      02        13        044              0.372250       4.191956       0.226366       0.343697       0.133000       0.142800   -9999.000000       0.408000
57781     57781     hunan          113.5100       27.6297          129       174     2012      02        14        045              0.369333       4.888794       0.378211       0.342560   -9999.000000   -9999.000000       0.101600   -9999.000000
57781     57781     hunan          113.5100       27.6297          129       174     2012      02        15        046              0.371208       4.745819       0.180279       0.341560   -9999.000000       0.155800       0.117000       0.620000
57781     57781     hunan          113.5100       27.6297          129       174     2012      02        16        047              0.371500       4.599396       0.000000       0.340452   -9999.000000   -9999.000000       0.105700   -9999.000000
57781     57781     hunan          113.5100       27.6297          129       174     2012      02        17        048              0.367208       4.177307       0.000000       0.339553   -9999.000000   -9999.000000   -9999.000000       0.427000
57781     57781     hunan          113.5100       27.6297          129       174     2012      02        18        049              0.362167       6.127319       0.000000       0.338145   -9999.000000   -9999.000000   -9999.000000       0.147000
57781     57781     hunan          113.5100       27.6297          129       174     2012      02        19        050              0.354625       5.144958       0.536230       0.337336       0.122000   -9999.000000       0.087800   -9999.000000
57781     57781     hunan          113.5100       27.6297          129       174     2012      02        20        051              0.358333       8.520355       0.592056       0.335045   -9999.000000   -9999.000000       0.060200       0.383000
57781     57781     hunan          113.5100       27.6297          129       174     2012      02        21        052              0.362458       7.155609       0.137857       0.337174   -9999.000000   -9999.000000   -9999.000000   -9999.000000
57781     57781     hunan          113.5100       27.6297          129       174     2012      02        22        053              0.373667       7.703247      18.126011       0.336489       0.133000   -9999.000000   -9999.000000       0.471000
57781     57781     hunan          113.5100       27.6297          129       174     2012      02        23        054              0.391667       7.752808       9.379736       0.350985       0.132000       0.524100   -9999.000000       0.783000
57781     57781     hunan          113.5100       27.6297          129       174     2012      02        24        055              0.384250       7.861908       1.183904       0.361244       0.124000   -9999.000000   -9999.000000   -9999.000000
57781     57781     hunan          113.5100       27.6297          129       174     2012      02        25        056              0.383083       6.093658       0.450772       0.350853   -9999.000000       0.307800       0.059100       0.547000
57781     57781     hunan          113.5100       27.6297          129       174     2012      02        26        057              0.381708       4.822388       0.874864       0.346209   -9999.000000       0.202800       0.061100   -9999.000000
57781     57781     hunan          113.5100       27.6297          129       174     2012      02        27        058              0.375583       4.189880       0.295946       0.343612   -9999.000000       0.294400   -9999.000000       0.313000
57781     57781     hunan          113.5100       27.6297          129       174     2012      02        28        059              0.370708       5.597198       1.969551       0.342168       0.111000       0.552700   -9999.000000       0.502000
57781     57781     hunan          113.5100       27.6297          129       174     2012      02        29        060              0.000000   -9999.000000       3.066690   -9999.000000   -9999.000000   -9999.000000   -9999.000000   -9999.000000
57781     57781     hunan          113.5100       27.6297          129       174     2012      03        01        061              0.380000       7.746704       1.107846       0.342983   -9999.000000       0.152200       0.072300       0.563000
57781     57781     hunan          113.5100       27.6297          129       174     2012      03        02        062              0.387875       6.923767      11.527630       0.344779   -9999.000000       0.207500       0.063900   -9999.000000
57781     57781     hunan          113.5100       27.6297          129       174     2012      03        03        063              0.386833       6.369263       9.752748       0.355907       0.171000   -9999.000000       0.056800       0.875000
57781     57781     hunan          113.5100       27.6297          129       174     2012      03        04        064              0.397250       6.286469      30.697554       0.362655   -9999.000000       0.321900       0.078500   -9999.000000
57781     57781     hunan          113.5100       27.6297          129       174     2012      03        05        065              0.382792       5.787079       0.250463       0.382143   -9999.000000   -9999.000000   -9999.000000       0.762000
57781     57781     hunan          113.5100       27.6297          129       174     2012      03        06        066              0.388292       6.291138      10.150953       0.369967       0.187000       0.390800   -9999.000000       0.430000
57781     57781     hunan          113.5100       27.6297          129       174     2012      03        07        067              0.000000       6.633942       2.922665       0.368333   -9999.000000       0.246400       0.061300   -9999.000000
57781     57781     hunan          113.5100       27.6297          129       174     2012      03        08        068              0.387458       7.060303       4.330988       0.364230   -9999.000000   -9999.000000       0.059200       0.729000
57781     57781     hunan          113.5100       27.6297          129       174     2012      03        09        069              0.386583       6.352356       1.634873       0.361439   -9999.000000       0.412500       0.071900   -9999.000000
57781     57781     hunan          113.5100       27.6297          129       174     2012      03        10        070              0.377167       5.908356       3.766679       0.359639   -9999.000000   -9999.000000   -9999.000000       0.538000
57781     57781     hunan          113.5100       27.6297          129       174     2012      03        11        071              0.369958       7.458862       2.182157       0.355695   -9999.000000       0.361800   -9999.000000       0.547000
57781     57781     hunan          113.5100       27.6297          129       174     2012      03        12        072              0.361333       9.652985       2.376428       0.352797   -9999.000000       0.273200   -9999.000000   -9999.000000
57781     57781     hunan          113.5100       27.6297          129       174     2012      03        13        073              0.353792      10.404724       0.000000       0.349238   -9999.000000   -9999.000000       0.051200       0.375000
57781     57781     hunan          113.5100       27.6297          129       174     2012      03        14        074              0.351708      11.026855       1.719356       0.346719       0.120000       0.264000       0.060300   -9999.000000
57781     57781     hunan          113.5100       27.6297          129       174     2012      03        15        075              0.373292      10.192780       1.959816       0.347733       0.128500       0.403900       0.070700       0.663000
57781     57781     hunan          113.5100       27.6297          129       174     2012      03        16        076              0.369958      11.826416       0.000000       0.350776       0.134500       0.270100   -9999.000000   -9999.000000
57781     57781     hunan          113.5100       27.6297          129       174     2012      03        17        077              0.366792      10.678986       0.863696       0.346378       0.135000       0.418500   -9999.000000       0.536000
57781     57781     hunan          113.5100       27.6297          129       174     2012      03        18        078              0.374125      11.642456       8.590612       0.345260   -9999.000000   -9999.000000       0.066100       0.707000
57781     57781     hunan          113.5100       27.6297          129       174     2012      03        19        079              0.384917      13.830933       0.925658       0.351937       0.118000       0.396400       0.086300   -9999.000000
57781     57781     hunan          113.5100       27.6297          129       174     2012      03        20        080              0.379750      12.295959       0.161773       0.352148       0.125000       0.152800       0.082900       0.577000
57781     57781     hunan          113.5100       27.6297          129       174     2012      03        21        081              0.376250       9.135345       0.000000       0.345780       0.099000   -9999.000000       0.085700   -9999.000000
57781     57781     hunan          113.5100       27.6297          129       174     2012      03        22        082              0.379417      10.601440       8.610586       0.344267       0.141000       0.473200   -9999.000000       0.613000
57781     57781     hunan          113.5100       27.6297          129       174     2012      03        23        083              0.380917       9.055237       0.093060       0.351327   -9999.000000   -9999.000000   -9999.000000       0.567000
57781     57781     hunan          113.5100       27.6297          129       174     2012      03        24        084              0.356542      11.375885       0.000000       0.349985   -9999.000000       0.180200   -9999.000000   -9999.000000
57781     57781     hunan          113.5100       27.6297          129       174     2012      03        25        085              0.000000      14.068115       0.000000       0.341982       0.091500   -9999.000000       0.081500       0.387000
57781     57781     hunan          113.5100       27.6297          129       174     2012      03        26        086              0.284042      15.603607       1.043683       0.338854       0.090000   -9999.000000       0.101300   -9999.000000
57781     57781     hunan          113.5100       27.6297          129       174     2012      03        27        087              0.263375      17.075867       0.434613       0.336239       0.096500       0.425900   -9999.000000       0.528000
57781     57781     hunan          113.5100       27.6297          129       174     2012      03        28        088              0.256333      18.523254       1.136932       0.334534   -9999.000000   -9999.000000   -9999.000000       0.595000
57781     57781     hunan          113.5100       27.6297          129       174     2012      03        29        089              0.311417      18.162994      11.467823       0.336231   -9999.000000       0.469400   -9999.000000       1.000000
57781     57781     hunan          113.5100       27.6297          129       174     2012      03        30        090              0.371042      16.361786      10.962022       0.352208       0.115000       0.170900       0.097300       0.546000
57781     57781     hunan          113.5100       27.6297          129       174     2012      03        31        091              0.343792      14.990295       0.077471       0.360285       0.091000   -9999.000000       0.094500   -9999.000000
57781     57781     hunan          113.5100       27.6297          129       174     2012      04        01        092              0.302042      16.779938       0.000000       0.341551       0.124500       0.327500       0.107100       0.530000
57781     57781     hunan          113.5100       27.6297          129       174     2012      04        02        093              0.272500      18.372131       0.000000       0.336793       0.131000   -9999.000000   -9999.000000   -9999.000000
57781     57781     hunan          113.5100       27.6297          129       174     2012      04        03        094              0.247417      20.966553       0.000000       0.334714   -9999.000000       0.258300   -9999.000000       0.484000
57781     57781     hunan          113.5100       27.6297          129       174     2012      04        04        095              0.255917      19.119934       5.366217       0.331371       0.130000   -9999.000000       0.092800       0.401000
57781     57781     hunan          113.5100       27.6297          129       174     2012      04        05        096              0.284583      14.953339       0.000000       0.343514       0.125000   -9999.000000       0.094500   -9999.000000
57781     57781     hunan          113.5100       27.6297          129       174     2012      04        06        097              0.276625      17.451721       0.393247       0.338655       0.125500       0.319000       0.102300       0.435000
57781     57781     hunan          113.5100       27.6297          129       174     2012      04        07        098              0.264333      17.774689       1.980954       0.336091       0.132000   -9999.000000       0.085400   -9999.000000
57781     57781     hunan          113.5100       27.6297          129       174     2012      04        08        099              0.268333      19.675568       0.601080       0.335873   -9999.000000   -9999.000000   -9999.000000       0.641000
57781     57781     hunan          113.5100       27.6297          129       174     2012      04        09        100              0.268875      17.213470       5.751627       0.338547       0.109000       0.310800   -9999.000000       0.573000
57781     57781     hunan          113.5100       27.6297          129       174     2012      04        10        101              0.283417      18.555328       5.094081       0.335411       0.129000   -9999.000000       0.070700   -9999.000000
57781     57781     hunan          113.5100       27.6297          129       174     2012      04        11        102              0.340500      20.566589      14.601890       0.341023       0.134000   -9999.000000       0.078900       0.834000
57781     57781     hunan          113.5100       27.6297          129       174     2012      04        12        103              0.369458      18.816589       7.358586       0.359355       0.167000   -9999.000000       0.092300   -9999.000000
57781     57781     hunan          113.5100       27.6297          129       174     2012      04        13        104              0.364375      18.788391       0.000000       0.352877   -9999.000000   -9999.000000   -9999.000000       0.665000
57781     57781     hunan          113.5100       27.6297          129       174     2012      04        14        105              0.372583      17.507721       3.048576       0.342928   -9999.000000       0.521900   -9999.000000   -9999.000000
57781     57781     hunan          113.5100       27.6297          129       174     2012      04        15        106              0.378375      15.472809      12.824133       0.345802       0.156000   -9999.000000   -9999.000000       0.649000
57781     57781     hunan          113.5100       27.6297          129       174     2012      04        16        107              0.367375      14.908478       1.675295       0.358643       0.137500       0.425800       0.136100       0.593000
57781     57781     hunan          113.5100       27.6297          129       174     2012      04        17        108              0.378792      17.574310       5.234628       0.347300       0.165000       0.147300       0.156900   -9999.000000
57781     57781     hunan          113.5100       27.6297          129       174     2012      04        18        109              0.369542      17.206604       0.000000       0.352015   -9999.000000   -9999.000000   -9999.000000       0.638000
57781     57781     hunan          113.5100       27.6297          129       174     2012      04        19        110              0.360833      18.943054       0.549857       0.344336   -9999.000000       0.293300   -9999.000000   -9999.000000
57781     57781     hunan          113.5100       27.6297          129       174     2012      04        20        111              0.379792      21.171417       9.552114       0.341577       0.159500   -9999.000000   -9999.000000       0.770000
57781     57781     hunan          113.5100       27.6297          129       174     2012      04        21        112              0.363750      18.218750       0.276711       0.355597       0.140000       0.257800       0.135400       0.666000
57781     57781     hunan          113.5100       27.6297          129       174     2012      04        22        113              0.336583      20.411041       0.000000       0.341793       0.146000       0.351500       0.144400   -9999.000000
57781     57781     hunan          113.5100       27.6297          129       174     2012      04        23        114              0.325667      22.420013       5.791456       0.336874       0.144000   -9999.000000       0.168100       0.698000
57781     57781     hunan          113.5100       27.6297          129       174     2012      04        24        115              0.352875      22.262634      14.923779       0.346727   -9999.000000       0.484100   -9999.000000   -9999.000000
57781     57781     hunan          113.5100       27.6297          129       174     2012      04        25        116              0.000000      23.796906       3.622095       0.358368       0.137000   -9999.000000   -9999.000000       0.738000
57781     57781     hunan          113.5100       27.6297          129       174     2012      04        26        117              0.371667      18.212250       0.000000       0.351875       0.151000   -9999.000000   -9999.000000       0.804000
57781     57781     hunan          113.5100       27.6297          129       174     2012      04        27        118              0.347458      21.168182       0.000000       0.342007       0.154500       0.365300   -9999.000000       0.588000
57781     57781     hunan          113.5100       27.6297          129       174     2012      04        28        119              0.342042      22.982819       0.740185       0.338832       0.178000   -9999.000000       0.153200       0.753000
57781     57781     hunan          113.5100       27.6297          129       174     2012      04        29        120              0.354292      23.425293      10.436157       0.339047   -9999.000000       0.377100       0.167600   -9999.000000
57781     57781     hunan          113.5100       27.6297          129       174     2012      04        30        121              0.356750      24.059601       6.538208       0.347417       0.161000       0.277800   -9999.000000       1.000000
57781     57781     hunan          113.5100       27.6297          129       174     2012      05        01        122              0.351750      23.710541       1.613421       0.354703       0.205500   -9999.000000   -9999.000000   -9999.000000
57781     57781     hunan          113.5100       27.6297          129       174     2012      05        02        123              0.345167      21.637787       0.923980       0.348614       0.194500       0.440700       0.119700       0.785000
57781     57781     hunan          113.5100       27.6297          129       174     2012      05        03        124              0.349792      22.090027       6.333448       0.342350       0.231000   -9999.000000       0.117500       0.776000
57781     57781     hunan          113.5100       27.6297          129       174     2012      05        04        125              0.345333      21.366974       1.020329       0.352188   -9999.000000       0.425000       0.102900   -9999.000000
57781     57781     hunan          113.5100       27.6297          129       174     2012      05        05        126              0.339000      22.877380       0.000000       0.343370   -9999.000000   -9999.000000       0.126600       0.672000
57781     57781     hunan          113.5100       27.6297          129       174     2012      05        06        127              0.327458      24.945282       0.000000       0.339370       0.164500   -9999.000000   -9999.000000   -9999.000000
57781     57781     hunan          113.5100       27.6297          129       174     2012      05        07        128              0.310917      26.414124       0.000000       0.335804   -9999.000000       0.295200   -9999.000000       0.636000
57781     57781     hunan          113.5100       27.6297          129       174     2012      05        08        129              0.300583      27.534485       2.204044       0.332955       0.169500   -9999.000000       0.111400       0.642000
57781     57781     hunan          113.5100       27.6297          129       174     2012      05        09        130              0.333333      27.188934      20.059801       0.336250   -9999.000000       0.461200       0.153300   -9999.000000
57781     57781     hunan          113.5100       27.6297          129       174     2012      05        10        131              0.343000      24.554352       0.087749       0.365916   -9999.000000       0.488300       0.139600       0.742000
57781     57781     hunan          113.5100       27.6297          129       174     2012      05        11        132              0.335625      23.750916       0.212826       0.346286       0.184000   -9999.000000   -9999.000000   -9999.000000
57781     57781     hunan          113.5100       27.6297          129       174     2012      05        12        133              0.349875      26.293396      37.471657       0.339533       0.224000       0.197500   -9999.000000       1.000000
57781     57781     hunan          113.5100       27.6297          129       174     2012      05        13        134              0.344708      23.107849       7.256660       0.376786       0.247500   -9999.000000   -9999.000000   -9999.000000
57781     57781     hunan          113.5100       27.6297          129       174     2012      05        14        135              0.354000      21.269196      17.551359       0.359784   -9999.000000   -9999.000000       0.178600       0.802000
57781     57781     hunan          113.5100       27.6297          129       174     2012      05        15        136              0.345583      19.854614       0.000000       0.374264   -9999.000000       0.447400       0.167500       0.615000
57781     57781     hunan          113.5100       27.6297          129       174     2012      05        16        137              0.338000      20.967377       0.000000       0.359964       0.165000   -9999.000000       0.187300   -9999.000000
57781     57781     hunan          113.5100       27.6297          129       174     2012      05        17        138              0.323792      23.905579       0.000000       0.353691       0.173500       0.402900   -9999.000000       0.572000
57781     57781     hunan          113.5100       27.6297          129       174     2012      05        18        139              0.306083      25.266479       7.229330       0.348300       0.187500       0.588800   -9999.000000   -9999.000000
57781     57781     hunan          113.5100       27.6297          129       174     2012      05        19        140              0.336917      27.102509       9.785326       0.349836       0.239000   -9999.000000       0.170900       0.646000
57781     57781     hunan          113.5100       27.6297          129       174     2012      05        20        141              0.325708      23.605682       0.000000       0.364582   -9999.000000       0.401100       0.159000       0.712000
57781     57781     hunan          113.5100       27.6297          129       174     2012      05        21        142              0.309167      25.017365       0.000000       0.346772       0.229000   -9999.000000       0.098500   -9999.000000
57781     57781     hunan          113.5100       27.6297          129       174     2012      05        22        143              0.319167      25.174591      20.087845       0.342786       0.309000       0.477200       0.125700       0.975000
57781     57781     hunan          113.5100       27.6297          129       174     2012      05        23        144              0.349750      22.902924       6.640746       0.362231   -9999.000000       0.284100   -9999.000000   -9999.000000
57781     57781     hunan          113.5100       27.6297          129       174     2012      05        24        145              0.352000      22.137817       6.390051       0.362607       0.432000   -9999.000000   -9999.000000       1.000000
57781     57781     hunan          113.5100       27.6297          129       174     2012      05        25        146              0.000000      21.638123      20.231310       0.359165   -9999.000000       0.243100       0.109000       1.000000
57781     57781     hunan          113.5100       27.6297          129       174     2012      05        26        147              0.352000      20.688324       9.031554       0.373834   -9999.000000   -9999.000000       0.120100       1.000000
57781     57781     hunan          113.5100       27.6297          129       174     2012      05        27        148              0.343875      21.288483       5.680594       0.371184       0.312000   -9999.000000       0.128400       0.739000
57781     57781     hunan          113.5100       27.6297          129       174     2012      05        28        149              0.338833      23.094971       0.157617       0.365588       0.282500       0.136200   -9999.000000   -9999.000000
57781     57781     hunan          113.5100       27.6297          129       174     2012      05        29        150              0.349000      23.837952      10.344042       0.357704       0.311000   -9999.000000   -9999.000000       0.938000
57781     57781     hunan          113.5100       27.6297          129       174     2012      05        30        151              0.347750      24.830048       0.000000       0.362428   -9999.000000       0.295200   -9999.000000   -9999.000000
57781     57781     hunan          113.5100       27.6297          129       174     2012      05        31        152              0.343208      24.368683       5.299041       0.354433   -9999.000000       0.333800   -9999.000000   -9999.000000
57781     57781     hunan          113.5100       27.6297          129       174     2012      06        01        153              0.356083      25.334961       6.307566       0.353579       0.353000   -9999.000000       0.122700       0.943000
57781     57781     hunan          113.5100       27.6297          129       174     2012      06        02        154              0.347542      22.247772       0.000000       0.359458       0.348000       0.246300       0.123700   -9999.000000
57781     57781     hunan          113.5100       27.6297          129       174     2012      06        03        155              0.354625      23.417389      10.926444       0.350389       0.404000   -9999.000000   -9999.000000       1.000000
57781     57781     hunan          113.5100       27.6297          129       174     2012      06        04        156              0.358042      23.665009       3.857624       0.358124       0.469000       0.351800   -9999.000000   -9999.000000
57781     57781     hunan          113.5100       27.6297          129       174     2012      06        05        157              0.352917      22.883057       0.000000       0.358061   -9999.000000       0.247300       0.126600       0.712000
57781     57781     hunan          113.5100       27.6297          129       174     2012      06        06        158              0.348708      24.095612       5.190381       0.350769       0.332000   -9999.000000       0.114100       0.759000
57781     57781     hunan          113.5100       27.6297          129       174     2012      06        07        159              0.343792      25.502838       3.145602       0.355319       0.384000       0.312700       0.127300   -9999.000000
57781     57781     hunan          113.5100       27.6297          129       174     2012      06        08        160              0.342875      26.385681       7.983038       0.351182       0.343000   -9999.000000       0.120000       0.600000
57781     57781     hunan          113.5100       27.6297          129       174     2012      06        09        161              0.355292      27.419708       5.185446       0.357799       0.293000       0.600900   -9999.000000   -9999.000000
57781     57781     hunan          113.5100       27.6297          129       174     2012      06        10        162              0.358292      28.636597      25.449329       0.353952   -9999.000000   -9999.000000   -9999.000000       1.000000
57781     57781     hunan          113.5100       27.6297          129       174     2012      06        11        163              0.000000      27.431396       8.457397       0.374050   -9999.000000   -9999.000000       0.142300   -9999.000000
57781     57781     hunan          113.5100       27.6297          129       174     2012      06        12        164              0.351458      25.762146       0.000000       0.366264       0.267500       0.632400       0.145400       0.731000
57781     57781     hunan          113.5100       27.6297          129       174     2012      06        13        165              0.345125      28.009521       0.000000       0.355991       0.276000   -9999.000000       0.167400       0.615000
57781     57781     hunan          113.5100       27.6297          129       174     2012      06        14        166              0.352375      29.150818      14.210457       0.350827       0.293000   -9999.000000   -9999.000000   -9999.000000
57781     57781     hunan          113.5100       27.6297          129       174     2012      06        15        167              0.348792      27.770905       0.735912       0.361887   -9999.000000       0.475800   -9999.000000       0.569000
57781     57781     hunan          113.5100       27.6297          129       174     2012      06        16        168              0.338125      28.002106       0.453486       0.350700   -9999.000000   -9999.000000   -9999.000000   -9999.000000
57781     57781     hunan          113.5100       27.6297          129       174     2012      06        17        169              0.327792      27.956848       0.859590       0.345818       0.289500       0.326000       0.143400       0.547000
57781     57781     hunan          113.5100       27.6297          129       174     2012      06        18        170              0.311667      26.414673       0.000000       0.345372       0.251500       0.476200       0.172300       0.470000
57781     57781     hunan          113.5100       27.6297          129       174     2012      06        19        171              0.293875      27.801605       0.000000       0.340855       0.264500       0.212300       0.166600   -9999.000000
57781     57781     hunan          113.5100       27.6297          129       174     2012      06        20        172              0.278750      28.747162       0.000000       0.338125       0.277000       0.177400   -9999.000000       0.441000
57781     57781     hunan          113.5100       27.6297          129       174     2012      06        21        173              0.265625      29.310394       1.769835       0.335566   -9999.000000   -9999.000000   -9999.000000   -9999.000000
57781     57781     hunan          113.5100       27.6297          129       174     2012      06        22        174              0.305750      28.853363       2.938503       0.335147       0.260000       0.429000       0.146600       0.489000
57781     57781     hunan          113.5100       27.6297          129       174     2012      06        23        175              0.306417      26.338318       1.583899       0.339290       0.274000       0.593900       0.163000       0.763000
57781     57781     hunan          113.5100       27.6297          129       174     2012      06        24        176              0.311333      25.816833       0.927039       0.339448       0.269500   -9999.000000       0.170200       0.717000
57781     57781     hunan          113.5100       27.6297          129       174     2012      06        25        177              0.332833      27.854889       1.180685       0.333108       0.283000       0.342800       0.188500       0.560000
57781     57781     hunan          113.5100       27.6297          129       174     2012      06        26        178              0.343125      28.317322      34.794369       0.332978   -9999.000000   -9999.000000   -9999.000000   -9999.000000
57781     57781     hunan          113.5100       27.6297          129       174     2012      06        27        179              0.338625      27.527466       7.694296       0.368969       0.298000   -9999.000000   -9999.000000       0.918000
57781     57781     hunan          113.5100       27.6297          129       174     2012      06        28        180              0.324208      28.343567      20.443209       0.359051       0.265000       0.563400       0.167900   -9999.000000
57781     57781     hunan          113.5100       27.6297          129       174     2012      06        29        181              0.300917      29.765961       0.000000       0.343532       0.252500   -9999.000000       0.186600   -9999.000000
57781     57781     hunan          113.5100       27.6297          129       174     2012      06        30        182              0.278500      30.899628       0.220703       0.337608       0.247000       0.470000       0.184700   -9999.000000
57781     57781     hunan          113.5100       27.6297          129       174     2012      07        01        183              0.259125      30.661804       0.000000       0.333937   -9999.000000   -9999.000000   -9999.000000   -9999.000000
57781     57781     hunan          113.5100       27.6297          129       174     2012      07        02        184              0.245708      29.694031       0.000000       0.329947   -9999.000000       0.447500   -9999.000000       0.647000
57781     57781     hunan          113.5100       27.6297          129       174     2012      07        03        185              0.234250      29.698151       0.000000       0.327045       0.266000       0.352900   -9999.000000   -9999.000000
57781     57781     hunan          113.5100       27.6297          129       174     2012      07        04        186              0.223375      30.059845       0.000000       0.324569       0.244500   -9999.000000       0.189900       0.536000
57781     57781     hunan          113.5100       27.6297          129       174     2012      07        05        187              0.214542      30.276154       0.000000       0.321905       0.262000       0.378900       0.193000       0.538000
57781     57781     hunan          113.5100       27.6297          129       174     2012      07        06        188              0.208167      30.608917       0.000000       0.319735   -9999.000000       0.333400       0.203200   -9999.000000
57781     57781     hunan          113.5100       27.6297          129       174     2012      07        07        189              0.203000      30.914612       0.000000       0.317360   -9999.000000   -9999.000000   -9999.000000       0.503000
57781     57781     hunan          113.5100       27.6297          129       174     2012      07        08        190              0.199083      30.226685       0.000000       0.314304       0.241000       0.300100   -9999.000000   -9999.000000
57781     57781     hunan          113.5100       27.6297          129       174     2012      07        09        191              0.195833      30.266174       0.000000       0.311494       0.255000   -9999.000000       0.139200       0.474000
57781     57781     hunan          113.5100       27.6297          129       174     2012      07        10        192              0.193542      30.495667       0.000000       0.308513       0.256500       0.184700       0.146300   -9999.000000
57781     57781     hunan          113.5100       27.6297          129       174     2012      07        11        193              0.191583      30.548004       0.000000       0.306099       0.271000       0.288100       0.153100       0.403000
57781     57781     hunan          113.5100       27.6297          129       174     2012      07        12        194              0.189750      30.768494       0.000000       0.303751   -9999.000000   -9999.000000   -9999.000000       0.540000
57781     57781     hunan          113.5100       27.6297          129       174     2012      07        13        195              0.188125      30.348450       1.745774       0.301818       0.243000       0.382600   -9999.000000   -9999.000000
57781     57781     hunan          113.5100       27.6297          129       174     2012      07        14        196              0.229208      29.809357      41.048012       0.302286   -9999.000000   -9999.000000   -9999.000000       0.811000
57781     57781     hunan          113.5100       27.6297          129       174     2012      07        15        197              0.277500      27.334808      25.451555       0.369414       0.376000       0.324700       0.143700   -9999.000000
57781     57781     hunan          113.5100       27.6297          129       174     2012      07        16        198              0.330500      27.620758     121.846687       0.372394   -9999.000000   -9999.000000       0.165600       1.000000
57781     57781     hunan          113.5100       27.6297          129       174     2012      07        17        199              0.336625      26.178986      30.573727       0.507885   -9999.000000   -9999.000000       0.262800       1.000000
57781     57781     hunan          113.5100       27.6297          129       174     2012      07        18        200              0.333833      27.468353       5.605381       0.529141   -9999.000000       0.397400   -9999.000000   -9999.000000
57781     57781     hunan          113.5100       27.6297          129       174     2012      07        19        201              0.326417      27.754486       0.000000       0.466434       0.287000   -9999.000000   -9999.000000       0.478000
57781     57781     hunan          113.5100       27.6297          129       174     2012      07        20        202              0.312083      28.976074       0.531887       0.388165       0.267000       0.332500       0.225500   -9999.000000
57781     57781     hunan          113.5100       27.6297          129       174     2012      07        21        203              0.289652      30.254150       0.000000       0.362786       0.256000       0.355200       0.216400       0.547000
57781     57781     hunan          113.5100       27.6297          129       174     2012      07        22        204              0.259208      31.226013       1.653792       0.353668       0.266000   -9999.000000       0.240400       0.585000
57781     57781     hunan          113.5100       27.6297          129       174     2012      07        23        205              0.244875      31.351349       0.536865       0.346919   -9999.000000       0.045400       0.146600       0.409000
57781     57781     hunan          113.5100       27.6297          129       174     2012      07        24        206              0.242583      30.751984       0.391770       0.342592       0.222000       0.263200   -9999.000000       0.431000
57781     57781     hunan          113.5100       27.6297          129       174     2012      07        25        207              0.240250      29.453491       0.451929       0.340326       0.244500   -9999.000000   -9999.000000   -9999.000000
57781     57781     hunan          113.5100       27.6297          129       174     2012      07        26        208              0.234625      30.081207       1.133963       0.335689       0.248000       0.121100       0.128300       0.553000
57781     57781     hunan          113.5100       27.6297          129       174     2012      07        27        209              0.260042      30.256531      11.474439       0.332912       0.242000   -9999.000000       0.148200   -9999.000000
57781     57781     hunan          113.5100       27.6297          129       174     2012      07        28        210              0.261833      29.402252       0.326561       0.352191   -9999.000000       0.088600       0.149100       0.379000
57781     57781     hunan          113.5100       27.6297          129       174     2012      07        29        211              0.242083      29.831482       0.000000       0.337843   -9999.000000   -9999.000000   -9999.000000       0.524000
57781     57781     hunan          113.5100       27.6297          129       174     2012      07        30        212              0.228542      31.132294       3.785587       0.331127       0.216000   -9999.000000   -9999.000000   -9999.000000
57781     57781     hunan          113.5100       27.6297          129       174     2012      07        31        213              0.218500      31.005341       0.000000       0.334130       0.201000       0.036200   -9999.000000       0.379000
57781     57781     hunan          113.5100       27.6297          129       174     2012      08        01        214              0.210250      31.083282       3.724182       0.327860       0.246500   -9999.000000       0.214700   -9999.000000
57781     57781     hunan          113.5100       27.6297          129       174     2012      08        02        215              0.204625      30.794769       0.000000       0.330986   -9999.000000       0.146500       0.205300       0.396000
57781     57781     hunan          113.5100       27.6297          129       174     2012      08        03        216              0.199917      30.461090       1.523498       0.323710   -9999.000000       0.191000       0.212900       0.485000
57781     57781     hunan          113.5100       27.6297          129       174     2012      08        04        217              0.273625      29.345551      25.028004       0.318923       0.255000   -9999.000000   -9999.000000   -9999.000000
57781     57781     hunan          113.5100       27.6297          129       174     2012      08        05        218              0.295792      27.214935       0.000000       0.360885       0.264500   -9999.000000   -9999.000000       0.435000
57781     57781     hunan          113.5100       27.6297          129       174     2012      08        06        219              0.309083      27.746307       4.375096       0.340367       0.228500   -9999.000000       0.140800   -9999.000000
57781     57781     hunan          113.5100       27.6297          129       174     2012      08        07        220              0.310917      28.801056       0.744858       0.340614       0.242000       0.276800       0.121900       0.523000
57781     57781     hunan          113.5100       27.6297          129       174     2012      08        08        221              0.300542      29.667572       0.000000       0.331082   -9999.000000       0.031800       0.120400   -9999.000000
57781     57781     hunan          113.5100       27.6297          129       174     2012      08        09        222              0.298458      29.474060       4.651041       0.324159   -9999.000000   -9999.000000       0.125300       0.381000
57781     57781     hunan          113.5100       27.6297          129       174     2012      08        10        223              0.321167      28.738495       6.144970       0.329229       0.244000   -9999.000000   -9999.000000       0.730000
57781     57781     hunan          113.5100       27.6297          129       174     2012      08        11        224              0.328042      28.298157       7.072979       0.339260       0.253500   -9999.000000   -9999.000000   -9999.000000
57781     57781     hunan          113.5100       27.6297          129       174     2012      08        12        225              0.328292      28.665771       8.241836       0.343983       0.258000   -9999.000000       0.118300       0.680000
57781     57781     hunan          113.5100       27.6297          129       174     2012      08        13        226              0.319375      28.472809      10.696633       0.347027   -9999.000000       0.125200       0.208300   -9999.000000
57781     57781     hunan          113.5100       27.6297          129       174     2012      08        14        227              0.319667      30.203766       0.242842       0.334633   -9999.000000   -9999.000000       0.231000       0.517000
57781     57781     hunan          113.5100       27.6297          129       174     2012      08        15        228              0.306542      30.387665       0.000000       0.328755       0.244500   -9999.000000   -9999.000000       0.434000
57781     57781     hunan          113.5100       27.6297          129       174     2012      08        16        229              0.286125      30.809418       2.993515       0.323813       0.219000   -9999.000000   -9999.000000   -9999.000000
57781     57781     hunan          113.5100       27.6297          129       174     2012      08        17        230              0.260087      31.593414       2.254362       0.321449       0.233000   -9999.000000   -9999.000000       0.516000
57781     57781     hunan          113.5100       27.6297          129       174     2012      08        18        231              0.245333      31.057739       0.403568       0.324176       0.216000       0.158200       0.203900   -9999.000000
57781     57781     hunan          113.5100       27.6297          129       174     2012      08        19        232              0.251792      31.314941       1.199984       0.319210   -9999.000000   -9999.000000       0.229600       0.371000
57781     57781     hunan          113.5100       27.6297          129       174     2012      08        20        233              0.238750      31.464172       0.199104       0.316056       0.216000       0.052100       0.149200       0.464000
57781     57781     hunan          113.5100       27.6297          129       174     2012      08        21        234              0.234125      31.107239       3.731538       0.312983       0.273000   -9999.000000   -9999.000000   -9999.000000
57781     57781     hunan          113.5100       27.6297          129       174     2012      08        22        235              0.314208      29.190735      13.655009       0.315509       0.315000   -9999.000000   -9999.000000   -9999.000000
57781     57781     hunan          113.5100       27.6297          129       174     2012      08        23        236              0.308417      25.277863       0.985191       0.346264       0.344000       0.197300       0.169800   -9999.000000
57781     57781     hunan          113.5100       27.6297          129       174     2012      08        24        237              0.302083      24.443878       3.363676       0.336434   -9999.000000   -9999.000000       0.157300       0.493000
57781     57781     hunan          113.5100       27.6297          129       174     2012      08        25        238              0.000000      26.436401       0.000000       0.328457   -9999.000000       0.043200       0.157300   -9999.000000
57781     57781     hunan          113.5100       27.6297          129       174     2012      08        26        239              0.284875      27.134949       5.922528       0.324156       0.249000       0.049600       0.154300       0.638000
57781     57781     hunan          113.5100       27.6297          129       174     2012      08        27        240              0.271917      27.887695       0.532787       0.333873       0.244500   -9999.000000   -9999.000000       0.636000
57781     57781     hunan          113.5100       27.6297          129       174     2012      08        28        241              0.258708      27.301483       1.168416       0.326349       0.248000       0.110000   -9999.000000   -9999.000000
57781     57781     hunan          113.5100       27.6297          129       174     2012      08        29        242              0.247458      28.024445       0.000000       0.320695   -9999.000000   -9999.000000       0.123800       0.323000
57781     57781     hunan          113.5100       27.6297          129       174     2012      08        30        243              0.237292      28.823242       0.000000       0.316626   -9999.000000   -9999.000000       0.141600   -9999.000000
57781     57781     hunan          113.5100       27.6297          129       174     2012      08        31        244              0.229917      29.456360       2.417982       0.314041       0.234000       0.121700       0.130300       0.436000
57781     57781     hunan          113.5100       27.6297          129       174     2012      09        01        245              0.222875      30.218842       4.447970       0.311114       0.247000   -9999.000000   -9999.000000       0.603000
57781     57781     hunan          113.5100       27.6297          129       174     2012      09        02        246              0.274000      30.831055      13.704799       0.309644       0.294000       0.217300   -9999.000000   -9999.000000
57781     57781     hunan          113.5100       27.6297          129       174     2012      09        03        247              0.301500      28.743225       3.665221       0.344288       0.295000       0.211600   -9999.000000       0.573000
57781     57781     hunan          113.5100       27.6297          129       174     2012      09        04        248              0.292458      24.923370       0.267086       0.336225   -9999.000000   -9999.000000       0.158600   -9999.000000
57781     57781     hunan          113.5100       27.6297          129       174     2012      09        05        249              0.277458      26.634613       0.000000       0.324489       0.239000       0.135400       0.176000       0.442000
57781     57781     hunan          113.5100       27.6297          129       174     2012      09        06        250              0.262458      26.322449       0.109553       0.318187       0.240000   -9999.000000       0.163600   -9999.000000
57781     57781     hunan          113.5100       27.6297          129       174     2012      09        07        251              0.250292      27.648621       0.000000       0.314583       0.245000   -9999.000000   -9999.000000       0.439000
57781     57781     hunan          113.5100       27.6297          129       174     2012      09        08        252              0.240333      28.713531       0.000000       0.312518       0.242000   -9999.000000   -9999.000000       0.397000
57781     57781     hunan          113.5100       27.6297          129       174     2012      09        09        253              0.235375      28.715057       0.000000       0.308527   -9999.000000   -9999.000000       0.160100   -9999.000000
57781     57781     hunan          113.5100       27.6297          129       174     2012      09        10        254              0.231792      26.384583       0.000000       0.309464   -9999.000000       0.086500       0.214900       0.288000
57781     57781     hunan          113.5100       27.6297          129       174     2012      09        11        255              0.228875      27.187347       3.693947       0.310069       0.184000   -9999.000000       0.193600   -9999.000000
57781     57781     hunan          113.5100       27.6297          129       174     2012      09        12        256              0.228333      28.831299       0.637697       0.317168       0.192000       0.001300   -9999.000000       0.363000
57781     57781     hunan          113.5100       27.6297          129       174     2012      09        13        257              0.254708      25.448914       1.244733       0.314925       0.207500   -9999.000000   -9999.000000       0.491000
57781     57781     hunan          113.5100       27.6297          129       174     2012      09        14        258              0.245750      21.716278       0.000000       0.318071       0.197000   -9999.000000   -9999.000000   -9999.000000
57781     57781     hunan          113.5100       27.6297          129       174     2012      09        15        259              0.227250      22.813019       0.000000       0.312840   -9999.000000       0.082600       0.193900       0.241000
57781     57781     hunan          113.5100       27.6297          129       174     2012      09        16        260              0.216750      23.070648       0.000000       0.308472       0.167000   -9999.000000       0.200800   -9999.000000
57781     57781     hunan          113.5100       27.6297          129       174     2012      09        17        261              0.212500      23.046478       0.000000       0.306566       0.188500   -9999.000000       0.176800       0.307000
57781     57781     hunan          113.5100       27.6297          129       174     2012      09        18        262              0.207583      22.338287       0.000000       0.306936       0.186500       0.018900   -9999.000000       0.407000
57781     57781     hunan          113.5100       27.6297          129       174     2012      09        19        263              0.202958      23.547760       0.000000       0.304570       0.189000   -9999.000000   -9999.000000       0.409000
57781     57781     hunan          113.5100       27.6297          129       174     2012      09        20        264              0.220250      24.539246      21.100002       0.302281   -9999.000000       0.103500       0.193600       0.394000
57781     57781     hunan          113.5100       27.6297          129       174     2012      09        21        265              0.318250      24.740112      48.765663       0.323410   -9999.000000       0.057200       0.207000   -9999.000000
57781     57781     hunan          113.5100       27.6297          129       174     2012      09        22        266              0.315583      23.282227       3.748287       0.384293       0.264000   -9999.000000       0.188800       0.928000
57781     57781     hunan          113.5100       27.6297          129       174     2012      09        23        267              0.321500      22.848602       9.100299       0.357930       0.281500       0.021000       0.195400   -9999.000000
57781     57781     hunan          113.5100       27.6297          129       174     2012      09        24        268              0.320417      22.998383       3.977633       0.356790       0.284000   -9999.000000   -9999.000000       0.845000
57781     57781     hunan          113.5100       27.6297          129       174     2012      09        25        269              0.312583      23.396545       1.364992       0.349119   -9999.000000       0.046900   -9999.000000       0.705000
57781     57781     hunan          113.5100       27.6297          129       174     2012      09        26        270              0.306583      24.333160       0.000000       0.338240   -9999.000000       0.054200       0.184600   -9999.000000
57781     57781     hunan          113.5100       27.6297          129       174     2012      09        27        271              0.302000      24.804504       0.000000       0.333209       0.217000   -9999.000000       0.212000       0.504000
57781     57781     hunan          113.5100       27.6297          129       174     2012      09        28        272              0.287333      24.527802       0.000000       0.329666       0.230000   -9999.000000       0.199700   -9999.000000
57781     57781     hunan          113.5100       27.6297          129       174     2012      09        29        273              0.276792      23.204102       0.000000       0.325109       0.217000   -9999.000000   -9999.000000       0.360000
57781     57781     hunan          113.5100       27.6297          129       174     2012      09        30        274              0.264792      21.783783       0.177972       0.322702       0.224000   -9999.000000   -9999.000000       0.574000
57781     57781     hunan          113.5100       27.6297          129       174     2012      10        01        275              0.254583      22.051483       0.282469       0.321579   -9999.000000       0.237400   -9999.000000   -9999.000000
57781     57781     hunan          113.5100       27.6297          129       174     2012      10        02        276              0.246125      22.190430       0.363803       0.320180       0.151000   -9999.000000       0.165300       0.509000
57781     57781     hunan          113.5100       27.6297          129       174     2012      10        03        277              0.243958      22.358978       0.728069       0.318669       0.169500       0.079900       0.178500   -9999.000000
57781     57781     hunan          113.5100       27.6297          129       174     2012      10        04        278              0.244958      21.420197       0.000000       0.319857       0.178500   -9999.000000       0.166400       0.425000
57781     57781     hunan          113.5100       27.6297          129       174     2012      10        05        279              0.244458      21.683533       0.000000       0.320317       0.195000   -9999.000000   -9999.000000   -9999.000000
57781     57781     hunan          113.5100       27.6297          129       174     2012      10        06        280              0.243958      20.557007       0.000000       0.321029   -9999.000000       0.294600   -9999.000000       0.443000
57781     57781     hunan          113.5100       27.6297          129       174     2012      10        07        281              0.242250      20.956940       0.000000       0.320832   -9999.000000   -9999.000000       0.195800       0.361000
57781     57781     hunan          113.5100       27.6297          129       174     2012      10        08        282              0.239583      21.967987       0.000000       0.319856       0.170500       0.050700       0.134300   -9999.000000
57781     57781     hunan          113.5100       27.6297          129       174     2012      10        09        283              0.237583      22.079010       0.000000       0.318820       0.163000   -9999.000000       0.126700       0.345000
57781     57781     hunan          113.5100       27.6297          129       174     2012      10        10        284              0.234625      20.488861       0.000000       0.319766       0.166500   -9999.000000       0.135600   -9999.000000
57781     57781     hunan          113.5100       27.6297          129       174     2012      10        11        285              0.228583      21.521759       0.000000       0.317976       0.137000       0.087200   -9999.000000       0.333000
57781     57781     hunan          113.5100       27.6297          129       174     2012      10        12        286              0.223042      21.424805       0.000000       0.315556   -9999.000000   -9999.000000   -9999.000000       0.334000
57781     57781     hunan          113.5100       27.6297          129       174     2012      10        13        287              0.219375      21.993561       0.000000       0.314575       0.134000   -9999.000000       0.123500   -9999.000000
57781     57781     hunan          113.5100       27.6297          129       174     2012      10        14        288              0.218042      21.662018       0.171679       0.313382       0.150500   -9999.000000       0.126500       0.392000
57781     57781     hunan          113.5100       27.6297          129       174     2012      10        15        289              0.216792      20.659210       0.000000       0.315064       0.143500   -9999.000000       0.188100   -9999.000000
57781     57781     hunan          113.5100       27.6297          129       174     2012      10        16        290              0.221792      22.645111       2.181435       0.314136       0.158000       0.063000   -9999.000000       0.716000
57781     57781     hunan          113.5100       27.6297          129       174     2012      10        17        291              0.218625      20.884766       0.000000       0.319398   -9999.000000   -9999.000000   -9999.000000       0.479000
57781     57781     hunan          113.5100       27.6297          129       174     2012      10        18        292              0.210667      19.417358       0.000000       0.315282   -9999.000000   -9999.000000   -9999.000000       0.505000
57781     57781     hunan          113.5100       27.6297          129       174     2012      10        19        293              0.208125      19.581421       0.000000       0.313100       0.139000   -9999.000000       0.172000       0.431000
57781     57781     hunan          113.5100       27.6297          129       174     2012      10        20        294              0.206667      20.539276       0.161391       0.312981       0.127500   -9999.000000       0.200300   -9999.000000
57781     57781     hunan          113.5100       27.6297          129       174     2012      10        21        295              0.205667      23.051270       0.598863       0.311839       0.162000       0.176700       0.183800       0.545000
57781     57781     hunan          113.5100       27.6297          129       174     2012      10        22        296              0.243417      24.256287       4.595290       0.311255   -9999.000000   -9999.000000   -9999.000000   -9999.000000
57781     57781     hunan          113.5100       27.6297          129       174     2012      10        23        297              0.242667      18.719269       0.000000       0.327045   -9999.000000   -9999.000000   -9999.000000       0.458000
57781     57781     hunan          113.5100       27.6297          129       174     2012      10        24        298              0.235417      19.516113       0.000000       0.317595   -9999.000000   -9999.000000       0.122900       0.542000
57781     57781     hunan          113.5100       27.6297          129       174     2012      10        25        299              0.000000      19.062164       0.000000       0.315704       0.169500   -9999.000000       0.110400   -9999.000000
57781     57781     hunan          113.5100       27.6297          129       174     2012      10        26        300              0.220333      20.364532       0.000000       0.313895       0.170500       0.090200       0.107100       0.413000
57781     57781     hunan          113.5100       27.6297          129       174     2012      10        27        301              0.216542      21.078796       2.089095       0.312362       0.177000   -9999.000000       0.120200   -9999.000000
57781     57781     hunan          113.5100       27.6297          129       174     2012      10        28        302              0.000000      19.983307       8.204582       0.315010   -9999.000000   -9999.000000   -9999.000000       0.520000
57781     57781     hunan          113.5100       27.6297          129       174     2012      10        29        303              0.312792      19.654999      24.313633       0.334681       0.194000       0.101000   -9999.000000       0.888000
57781     57781     hunan          113.5100       27.6297          129       174     2012      10        30        304              0.306167      19.478516       0.320299       0.363581       0.183000   -9999.000000       0.147000   -9999.000000
57781     57781     hunan          113.5100       27.6297          129       174     2012      10        31        305              0.299250      17.704224       0.000000       0.344201       0.191000   -9999.000000       0.148900       0.454000
57781     57781     hunan          113.5100       27.6297          129       174     2012      11        01        306              0.292958      17.117615       0.000000       0.334175       0.169000   -9999.000000       0.164200   -9999.000000
57781     57781     hunan          113.5100       27.6297          129       174     2012      11        02        307              0.287958      16.506561       0.000000       0.329320   -9999.000000   -9999.000000   -9999.000000       0.394000
57781     57781     hunan          113.5100       27.6297          129       174     2012      11        03        308              0.287125      17.484283       0.669379       0.325354   -9999.000000       0.168900   -9999.000000   -9999.000000
57781     57781     hunan          113.5100       27.6297          129       174     2012      11        04        309              0.284292      16.092712       0.000000       0.325823       0.152000   -9999.000000   -9999.000000       0.395000
57781     57781     hunan          113.5100       27.6297          129       174     2012      11        05        310              0.279208      16.303925       0.184097       0.322864       0.167500       0.062600       0.141900       0.437000
57781     57781     hunan          113.5100       27.6297          129       174     2012      11        06        311              0.278333      16.609009       0.279739       0.321430       0.162000   -9999.000000       0.130600   -9999.000000
57781     57781     hunan          113.5100       27.6297          129       174     2012      11        07        312              0.313458      16.322235      36.312302       0.320737       0.209000   -9999.000000       0.176300       0.733000
57781     57781     hunan          113.5100       27.6297          129       174     2012      11        08        313              0.325190      14.243134      26.369963       0.352711   -9999.000000       0.163000   -9999.000000   -9999.000000
57781     57781     hunan          113.5100       27.6297          129       174     2012      11        09        314              0.326208      13.575897      23.334190       0.377152       0.198000   -9999.000000   -9999.000000       1.000000
57781     57781     hunan          113.5100       27.6297          129       174     2012      11        10        315              0.315542      13.842621       0.229469       0.373602       0.213000   -9999.000000       0.147200       0.975000
57781     57781     hunan          113.5100       27.6297          129       174     2012      11        11        316              0.305583      13.270386       0.676346       0.355529       0.181000   -9999.000000       0.150500   -9999.000000
57781     57781     hunan          113.5100       27.6297          129       174     2012      11        12        317              0.299833      14.033447       0.000000       0.344195       0.170000   -9999.000000       0.182300       0.370000
57781     57781     hunan          113.5100       27.6297          129       174     2012      11        13        318              0.000000      14.443939       0.000000       0.340686   -9999.000000       0.045900   -9999.000000   -9999.000000
57781     57781     hunan          113.5100       27.6297          129       174     2012      11        14        319              0.299542      15.475464       2.138233       0.338632   -9999.000000   -9999.000000   -9999.000000       0.542000
57781     57781     hunan          113.5100       27.6297          129       174     2012      11        15        320              0.324947      14.461914      25.001162       0.341818       0.235000   -9999.000000   -9999.000000       1.000000
57781     57781     hunan          113.5100       27.6297          129       174     2012      11        16        321              0.000000      13.360077      22.103460       0.366906   -9999.000000       0.087800       0.177300       0.875000
57781     57781     hunan          113.5100       27.6297          129       174     2012      11        17        322              0.000000      10.863922       1.328323       0.375158   -9999.000000   -9999.000000       0.178500       0.337000
57781     57781     hunan          113.5100       27.6297          129       174     2012      11        18        323              0.306875      11.740997       2.580008       0.357686       0.206000       0.071100       0.187800   -9999.000000
57781     57781     hunan          113.5100       27.6297          129       174     2012      11        19        324              0.303292      12.173065       0.000000       0.353977   -9999.000000       0.079800   -9999.000000       0.597000
57781     57781     hunan          113.5100       27.6297          129       174     2012      11        20        325              0.307042      12.850861       2.230942       0.351800       0.181000   -9999.000000   -9999.000000   -9999.000000
57781     57781     hunan          113.5100       27.6297          129       174     2012      11        21        326              0.321583      13.072754       1.920041       0.352567       0.185000       0.186900       0.153000       0.805000
57781     57781     hunan          113.5100       27.6297          129       174     2012      11        22        327              0.324708      12.301880       6.674419       0.353022       0.181000   -9999.000000       0.128100       0.743000
57781     57781     hunan          113.5100       27.6297          129       174     2012      11        23        328              0.318042      11.887329       0.574779       0.357931       0.194000       0.090800       0.140400   -9999.000000
57781     57781     hunan          113.5100       27.6297          129       174     2012      11        24        329              0.315333      11.104828       2.855078       0.351538   -9999.000000       0.136500       0.137900       0.470000
57781     57781     hunan          113.5100       27.6297          129       174     2012      11        25        330              0.322667      11.289642       1.149005       0.351786       0.142000   -9999.000000   -9999.000000   -9999.000000
57781     57781     hunan          113.5100       27.6297          129       174     2012      11        26        331              0.314167      10.530884       2.218203       0.350817       0.158000       0.122200   -9999.000000       0.584000
57781     57781     hunan          113.5100       27.6297          129       174     2012      11        27        332              0.317125      10.876343       7.813615       0.347302       0.165000   -9999.000000       0.109400       0.521000
57781     57781     hunan          113.5100       27.6297          129       174     2012      11        28        333              0.319792      10.342957       0.101938       0.352902   -9999.000000   -9999.000000       0.101200   -9999.000000
57781     57781     hunan          113.5100       27.6297          129       174     2012      11        29        334              0.317750      10.200562       3.083363       0.352971   -9999.000000       0.180400       0.119000       0.562000
57781     57781     hunan          113.5100       27.6297          129       174     2012      11        30        335              0.328375      10.664703      12.425138       0.351523   -9999.000000   -9999.000000   -9999.000000   -9999.000000
57781     57781     hunan          113.5100       27.6297          129       174     2012      12        01        336              0.327750      10.278900       6.120577       0.359028   -9999.000000   -9999.000000   -9999.000000       0.705000
57781     57781     hunan          113.5100       27.6297          129       174     2012      12        02        337              0.316667       9.902527       0.000000       0.362780   -9999.000000   -9999.000000   -9999.000000   -9999.000000
57781     57781     hunan          113.5100       27.6297          129       174     2012      12        03        338              0.312542       8.369293       5.056839       0.353986   -9999.000000   -9999.000000       0.101700       0.484000
57781     57781     hunan          113.5100       27.6297          129       174     2012      12        04        339              0.310417       9.436432       0.381157       0.351107   -9999.000000       0.194800       0.094300       0.539000
57781     57781     hunan          113.5100       27.6297          129       174     2012      12        05        340              0.308667       9.707733       0.000000       0.349340   -9999.000000   -9999.000000       0.109800   -9999.000000
57781     57781     hunan          113.5100       27.6297          129       174     2012      12        06        341              0.305583      10.345795       0.000000       0.347459   -9999.000000   -9999.000000   -9999.000000       0.383000
57781     57781     hunan          113.5100       27.6297          129       174     2012      12        07        342              0.303417      11.092316       0.000000       0.346329       0.166000   -9999.000000   -9999.000000   -9999.000000
57781     57781     hunan          113.5100       27.6297          129       174     2012      12        08        343              0.301292      11.812927       0.000000       0.345292       0.172000   -9999.000000       0.109400       0.497000
57781     57781     hunan          113.5100       27.6297          129       174     2012      12        09        344              0.307250      11.410461       3.543353       0.344680   -9999.000000       0.108400       0.106100       0.468000
57781     57781     hunan          113.5100       27.6297          129       174     2012      12        10        345              0.329292       9.922424       6.534700       0.347302   -9999.000000   -9999.000000       0.074400   -9999.000000
57781     57781     hunan          113.5100       27.6297          129       174     2012      12        11        346              0.322292       7.931366       0.000000       0.355859   -9999.000000       0.214200       0.083400       0.394000
57781     57781     hunan          113.5100       27.6297          129       174     2012      12        12        347              0.321375       7.560699       0.139166       0.347407       0.165000       0.164600   -9999.000000   -9999.000000
57781     57781     hunan          113.5100       27.6297          129       174     2012      12        13        348              0.322458       7.859497       0.000000       0.345448       0.164500   -9999.000000   -9999.000000       0.539000
57781     57781     hunan          113.5100       27.6297          129       174     2012      12        14        349              0.318083       9.569092       0.000000       0.344738       0.172000       0.044600       0.078200       0.476000
57781     57781     hunan          113.5100       27.6297          129       174     2012      12        15        350              0.000000       8.923492       1.725193       0.343718       0.222000   -9999.000000       0.084600       0.595000
57781     57781     hunan          113.5100       27.6297          129       174     2012      12        16        351              0.000000       7.255341       1.547973       0.345464   -9999.000000       0.086100       0.093400       0.290000
57781     57781     hunan          113.5100       27.6297          129       174     2012      12        17        352              0.335522       7.537964      16.252712       0.345848       0.187000       0.113400   -9999.000000   -9999.000000
57781     57781     hunan          113.5100       27.6297          129       174     2012      12        18        353              0.330292       7.072968       0.484660       0.364692   -9999.000000   -9999.000000   -9999.000000       0.564000
57781     57781     hunan          113.5100       27.6297          129       174     2012      12        19        354              0.329417       5.776825      11.710186       0.351422       0.198000       0.087600   -9999.000000   -9999.000000
57781     57781     hunan          113.5100       27.6297          129       174     2012      12        20        355              0.000000       6.340057      16.592220       0.357816       0.234000   -9999.000000       0.096700       0.999000
57781     57781     hunan          113.5100       27.6297          129       174     2012      12        21        356              0.327042       5.097046       0.388953       0.368246   -9999.000000   -9999.000000       0.089300       0.416000
57781     57781     hunan          113.5100       27.6297          129       174     2012      12        22        357              0.321375       3.826752       0.143535       0.359675   -9999.000000       0.152000       0.095500   -9999.000000
57781     57781     hunan          113.5100       27.6297          129       174     2012      12        23        358              0.317708       4.146210       0.602251       0.354718   -9999.000000   -9999.000000   -9999.000000       0.276000
57781     57781     hunan          113.5100       27.6297          129       174     2012      12        24        359              0.314778       4.653809       2.211048       0.352174   -9999.000000       0.140700   -9999.000000   -9999.000000
57781     57781     hunan          113.5100       27.6297          129       174     2012      12        25        360              0.315042       5.794067       0.545901       0.349931   -9999.000000   -9999.000000       0.113200       0.488000
57781     57781     hunan          113.5100       27.6297          129       174     2012      12        26        361              0.000000       4.456970      15.925631       0.349212   -9999.000000   -9999.000000       0.126400       0.442000
57781     57781     hunan          113.5100       27.6297          129       174     2012      12        27        362              0.337333       2.554077       3.934076       0.353465   -9999.000000   -9999.000000       0.136700   -9999.000000
57781     57781     hunan          113.5100       27.6297          129       174     2012      12        28        363              0.325000       3.360779       7.203746       0.353758   -9999.000000   -9999.000000   -9999.000000       0.702000
57781     57781     hunan          113.5100       27.6297          129       174     2012      12        29        364              0.000000       3.402496      11.824614       0.360278   -9999.000000   -9999.000000   -9999.000000   -9999.000000
57781     57781     hunan          113.5100       27.6297          129       174     2012      12        30        365              0.000000       3.671936       1.120052       0.360180   -9999.000000   -9999.000000   -9999.000000       0.254000
57781     57781     hunan          113.5100       27.6297          129       174     2012      12        31        366              0.320800       2.840759       0.000000       0.364932   -9999.000000   -9999.000000       0.119300   -9999.000000
