# Supplementary material for: Research on Fusing Multisatellite Soil Moisture Data Based on Bayesian Model Averaging
Source: Hindawi journal article supplement (doi:10.1155/2018/9310838), 2018-06-25
Supplement: f1 [file 9310838.f1.zip › 2012_sm00-10cm_daily_ZDB_ZHY_57806_366days_allin.txt]

57806     57806     guizhou        105.9097       26.2622          135       144     2012      01        01        001              0.000000   -9999.000000       0.647651   -9999.000000       0.117500       0.023600   -9999.000000   -9999.000000
57806     57806     guizhou        105.9097       26.2622          135       144     2012      01        02        002              0.252000       2.028564       1.300913       0.279706   -9999.000000       0.113500   -9999.000000       0.283000
57806     57806     guizhou        105.9097       26.2622          135       144     2012      01        03        003              0.000000       3.150940       1.301359       0.301684   -9999.000000   -9999.000000       0.036800       0.340000
57806     57806     guizhou        105.9097       26.2622          135       144     2012      01        04        004              0.255000       1.796204       2.070915       0.288637   -9999.000000   -9999.000000       0.035700       0.227000
57806     57806     guizhou        105.9097       26.2622          135       144     2012      01        05        005              0.255000       0.919861       0.371414       0.258848   -9999.000000   -9999.000000       0.030600   -9999.000000
57806     57806     guizhou        105.9097       26.2622          135       144     2012      01        06        006              0.270792       0.537781       1.445345       0.229005   -9999.000000       0.012600   -9999.000000       0.292000
57806     57806     guizhou        105.9097       26.2622          135       144     2012      01        07        007              0.275478       1.065125       0.406508       0.255905   -9999.000000       0.220500   -9999.000000   -9999.000000
57806     57806     guizhou        105.9097       26.2622          135       144     2012      01        08        008              0.000000       1.163452       0.217814       0.265095   -9999.000000   -9999.000000   -9999.000000       0.425000
57806     57806     guizhou        105.9097       26.2622          135       144     2012      01        09        009              0.265000       1.972351       0.324455       0.285744   -9999.000000       0.183000   -9999.000000       0.395000
57806     57806     guizhou        105.9097       26.2622          135       144     2012      01        10        010              0.266167       2.427399       1.126074       0.293723   -9999.000000   -9999.000000       0.035500   -9999.000000
57806     57806     guizhou        105.9097       26.2622          135       144     2012      01        11        011              0.265783       2.345490       0.190193       0.294252   -9999.000000   -9999.000000       0.024500       0.304000
57806     57806     guizhou        105.9097       26.2622          135       144     2012      01        12        012              0.265000       2.401672       1.491684       0.296013   -9999.000000       0.103600   -9999.000000   -9999.000000
57806     57806     guizhou        105.9097       26.2622          135       144     2012      01        13        013              0.265500       3.931305       1.142174       0.301777   -9999.000000   -9999.000000   -9999.000000       0.713000
57806     57806     guizhou        105.9097       26.2622          135       144     2012      01        14        014              0.266565       3.569794       0.217477       0.304707   -9999.000000       0.188800   -9999.000000       0.515000
57806     57806     guizhou        105.9097       26.2622          135       144     2012      01        15        015              0.265000       2.645935       0.304570       0.300266   -9999.000000   -9999.000000       0.031100   -9999.000000
57806     57806     guizhou        105.9097       26.2622          135       144     2012      01        16        016              0.263696       3.086334       0.698504       0.299774       0.071000   -9999.000000       0.051300       0.278000
57806     57806     guizhou        105.9097       26.2622          135       144     2012      01        17        017              0.000000       7.097137       1.526439       0.299209   -9999.000000       0.294200       0.036300   -9999.000000
57806     57806     guizhou        105.9097       26.2622          135       144     2012      01        18        018              0.267000       2.668732       0.506986       0.301043   -9999.000000   -9999.000000   -9999.000000       0.560000
57806     57806     guizhou        105.9097       26.2622          135       144     2012      01        19        019              0.267000       2.888519       0.344911       0.298206   -9999.000000       0.371100   -9999.000000       0.301000
57806     57806     guizhou        105.9097       26.2622          135       144     2012      01        20        020              0.268522       3.226654       0.854072       0.298356   -9999.000000       0.300100       0.045600       0.484000
57806     57806     guizhou        105.9097       26.2622          135       144     2012      01        21        021              0.267000       2.871277       0.087709       0.294390   -9999.000000   -9999.000000       0.044800       0.436000
57806     57806     guizhou        105.9097       26.2622          135       144     2012      01        22        022              0.265250       1.698151       0.698730       0.278231   -9999.000000       0.294000       0.034000   -9999.000000
57806     57806     guizhou        105.9097       26.2622          135       144     2012      01        23        023              0.264217       0.984375       0.000000       0.254671   -9999.000000   -9999.000000   -9999.000000       0.367000
57806     57806     guizhou        105.9097       26.2622          135       144     2012      01        24        024              0.264542       1.080353       0.339820       0.255284   -9999.000000       0.322500   -9999.000000   -9999.000000
57806     57806     guizhou        105.9097       26.2622          135       144     2012      01        25        025              0.262522       0.993835       0.117002       0.246850   -9999.000000       0.264800   -9999.000000       0.281000
57806     57806     guizhou        105.9097       26.2622          135       144     2012      01        26        026              0.262000       1.834381       0.223793       0.267332   -9999.000000   -9999.000000       0.029300       0.282000
57806     57806     guizhou        105.9097       26.2622          135       144     2012      01        27        027              0.262913       1.732361       0.153986       0.276722   -9999.000000       0.224400       0.028600   -9999.000000
57806     57806     guizhou        105.9097       26.2622          135       144     2012      01        28        028              0.263625       2.008820       0.113520       0.282876   -9999.000000   -9999.000000       0.017600       0.331000
57806     57806     guizhou        105.9097       26.2622          135       144     2012      01        29        029              0.262000       2.564453       0.283765       0.287917   -9999.000000       0.148200   -9999.000000   -9999.000000
57806     57806     guizhou        105.9097       26.2622          135       144     2012      01        30        030              0.262000       1.965240       0.000000       0.282839   -9999.000000       0.059600   -9999.000000       0.250000
57806     57806     guizhou        105.9097       26.2622          135       144     2012      01        31        031              0.262000       2.353302       0.000000       0.283236   -9999.000000   -9999.000000   -9999.000000       0.283000
57806     57806     guizhou        105.9097       26.2622          135       144     2012      02        01        032              0.262000       3.075684       0.719678       0.291090       0.089000       0.112600       0.032200       0.306000
57806     57806     guizhou        105.9097       26.2622          135       144     2012      02        02        033              0.262000       5.187744       0.321865       0.295518   -9999.000000       0.039600       0.029600       0.341000
57806     57806     guizhou        105.9097       26.2622          135       144     2012      02        03        034              0.262000       2.780426       0.327189       0.292331   -9999.000000   -9999.000000       0.019400   -9999.000000
57806     57806     guizhou        105.9097       26.2622          135       144     2012      02        04        035              0.262000       5.201172       0.370807       0.294646   -9999.000000       0.291400   -9999.000000       0.138000
57806     57806     guizhou        105.9097       26.2622          135       144     2012      02        05        036              0.262000       7.557648       0.997864       0.296067       0.091000   -9999.000000   -9999.000000   -9999.000000
57806     57806     guizhou        105.9097       26.2622          135       144     2012      02        06        037              0.262000       7.571167       0.000000       0.295818       0.090000       0.033900       0.027100       0.288000
57806     57806     guizhou        105.9097       26.2622          135       144     2012      02        07        038              0.260125       7.144867       0.000000       0.293836       0.099000       0.289600       0.029600       0.238000
57806     57806     guizhou        105.9097       26.2622          135       144     2012      02        08        039              0.257000       5.828918       1.658211       0.292815   -9999.000000   -9999.000000       0.021300   -9999.000000
57806     57806     guizhou        105.9097       26.2622          135       144     2012      02        09        040              0.257000       2.437439       0.951102       0.287754   -9999.000000       0.058500   -9999.000000       0.101000
57806     57806     guizhou        105.9097       26.2622          135       144     2012      02        10        041              0.257000       2.653564       0.000000       0.284588   -9999.000000   -9999.000000   -9999.000000   -9999.000000
57806     57806     guizhou        105.9097       26.2622          135       144     2012      02        11        042              0.257000       1.663330       0.413362       0.273629   -9999.000000       0.124300   -9999.000000       0.385000
57806     57806     guizhou        105.9097       26.2622          135       144     2012      02        12        043              0.261583       2.007812       0.143295       0.285994   -9999.000000   -9999.000000   -9999.000000       0.383000
57806     57806     guizhou        105.9097       26.2622          135       144     2012      02        13        044              0.262000       5.573700       0.297707       0.296091   -9999.000000   -9999.000000       0.020400   -9999.000000
57806     57806     guizhou        105.9097       26.2622          135       144     2012      02        14        045              0.260261       7.903503       0.512779       0.296586   -9999.000000       0.209000   -9999.000000       0.158000
57806     57806     guizhou        105.9097       26.2622          135       144     2012      02        15        046              0.257000       4.644104       0.000000       0.295568   -9999.000000   -9999.000000   -9999.000000   -9999.000000
57806     57806     guizhou        105.9097       26.2622          135       144     2012      02        16        047              0.257000       3.730042       0.000000       0.295141   -9999.000000   -9999.000000   -9999.000000       0.320000
57806     57806     guizhou        105.9097       26.2622          135       144     2012      02        17        048              0.257000       3.857910       0.337040       0.293995   -9999.000000       0.001300       0.035400       0.210000
57806     57806     guizhou        105.9097       26.2622          135       144     2012      02        18        049              0.000000       2.163361       0.000000       0.282790   -9999.000000   -9999.000000       0.029500       0.253000
57806     57806     guizhou        105.9097       26.2622          135       144     2012      02        19        050              0.257000       1.723511       2.101419       0.271446   -9999.000000       0.151300       0.035700       0.209000
57806     57806     guizhou        105.9097       26.2622          135       144     2012      02        20        051              0.262391       2.532684       2.159012       0.286427   -9999.000000   -9999.000000       0.020100   -9999.000000
57806     57806     guizhou        105.9097       26.2622          135       144     2012      02        21        052              0.268136       4.028473       1.480237       0.303323       0.076000   -9999.000000   -9999.000000       0.645000
57806     57806     guizhou        105.9097       26.2622          135       144     2012      02        22        053              0.268944       5.343964       0.158216       0.305719       0.059000       0.244100   -9999.000000   -9999.000000
57806     57806     guizhou        105.9097       26.2622          135       144     2012      02        23        054              0.000000       6.155792       1.238252       0.301436       0.062000   -9999.000000       0.028700       0.802000
57806     57806     guizhou        105.9097       26.2622          135       144     2012      02        24        055              0.265000       6.767487       0.645625       0.301620   -9999.000000       0.119900       0.030700       0.505000
57806     57806     guizhou        105.9097       26.2622          135       144     2012      02        25        056              0.265000       7.033447       0.509698       0.301096   -9999.000000       0.166400       0.023800   -9999.000000
57806     57806     guizhou        105.9097       26.2622          135       144     2012      02        26        057              0.265087       4.371674       0.195424       0.299031   -9999.000000   -9999.000000   -9999.000000       0.336000
57806     57806     guizhou        105.9097       26.2622          135       144     2012      02        27        058              0.265000       2.933228       0.309299       0.290524   -9999.000000       0.200700   -9999.000000   -9999.000000
57806     57806     guizhou        105.9097       26.2622          135       144     2012      02        28        059              0.265000       3.115540       0.738535       0.291366   -9999.000000   -9999.000000   -9999.000000       0.472000
57806     57806     guizhou        105.9097       26.2622          135       144     2012      02        29        060              0.000000   -9999.000000       0.151359   -9999.000000   -9999.000000       0.108300   -9999.000000   -9999.000000
57806     57806     guizhou        105.9097       26.2622          135       144     2012      03        01        061              0.264375       3.006744       1.045115       0.293138   -9999.000000   -9999.000000       0.039400       0.190000
57806     57806     guizhou        105.9097       26.2622          135       144     2012      03        02        062              0.266304       8.801544       3.818877       0.295652       0.095500   -9999.000000       0.028000       0.394000
57806     57806     guizhou        105.9097       26.2622          135       144     2012      03        03        063              0.279917       7.224670      10.610696       0.305000       0.096500       0.190200   -9999.000000   -9999.000000
57806     57806     guizhou        105.9097       26.2622          135       144     2012      03        04        064              0.272217      10.161072       0.176279       0.324338       0.087500   -9999.000000   -9999.000000       0.390000
57806     57806     guizhou        105.9097       26.2622          135       144     2012      03        05        065              0.265750      11.224548       0.000000       0.310262   -9999.000000       0.042200       0.050900   -9999.000000
57806     57806     guizhou        105.9097       26.2622          135       144     2012      03        06        066              0.263174      13.624817       0.408989       0.300281   -9999.000000       0.209500       0.043700       0.269000
57806     57806     guizhou        105.9097       26.2622          135       144     2012      03        07        067              0.000000       8.094208       0.135860       0.298725       0.108000   -9999.000000       0.051100       0.313000
57806     57806     guizhou        105.9097       26.2622          135       144     2012      03        08        068              0.262000       7.097351       1.333289       0.297112       0.099000       0.140700       0.039000   -9999.000000
57806     57806     guizhou        105.9097       26.2622          135       144     2012      03        09        069              0.262000       5.567749       0.151332       0.296071       0.098000       0.034200   -9999.000000       0.194000
57806     57806     guizhou        105.9097       26.2622          135       144     2012      03        10        070              0.260043       5.219513       0.166361       0.295334       0.087000   -9999.000000   -9999.000000   -9999.000000
57806     57806     guizhou        105.9097       26.2622          135       144     2012      03        11        071              0.257000       6.198120       0.127242       0.294714   -9999.000000       0.152200       0.049200       0.288000
57806     57806     guizhou        105.9097       26.2622          135       144     2012      03        12        072              0.258957       6.114441       0.679919       0.294672   -9999.000000   -9999.000000       0.052700       0.342000
57806     57806     guizhou        105.9097       26.2622          135       144     2012      03        13        073              0.262000       5.082184       0.395637       0.296892       0.125500       0.182500       0.043800   -9999.000000
57806     57806     guizhou        105.9097       26.2622          135       144     2012      03        14        074              0.262000       9.094482       0.242365       0.294255       0.107000       0.104900   -9999.000000       0.264000
57806     57806     guizhou        105.9097       26.2622          135       144     2012      03        15        075              0.257652       9.683899       0.000000       0.293956       0.105000   -9999.000000   -9999.000000   -9999.000000
57806     57806     guizhou        105.9097       26.2622          135       144     2012      03        16        076              0.255667      15.639954       0.000000       0.288436   -9999.000000       0.313500   -9999.000000       0.297000
57806     57806     guizhou        105.9097       26.2622          135       144     2012      03        17        077              0.253375      14.926270       0.000000       0.287568   -9999.000000   -9999.000000       0.042800       0.357000
57806     57806     guizhou        105.9097       26.2622          135       144     2012      03        18        078              0.248875      17.820526       0.000000       0.283011       0.102500       0.227800       0.045700       0.289000
57806     57806     guizhou        105.9097       26.2622          135       144     2012      03        19        079              0.244609      19.455292       0.000000       0.279791       0.097000       0.177700       0.042800       0.450000
57806     57806     guizhou        105.9097       26.2622          135       144     2012      03        20        080              0.239000      20.297394       0.000000       0.275499       0.098500   -9999.000000   -9999.000000   -9999.000000
57806     57806     guizhou        105.9097       26.2622          135       144     2012      03        21        081              0.233474      21.711609       0.000000       0.273018   -9999.000000       0.150300   -9999.000000       0.389000
57806     57806     guizhou        105.9097       26.2622          135       144     2012      03        22        082              0.230750      20.739075       2.280199       0.272869   -9999.000000   -9999.000000       0.061500   -9999.000000
57806     57806     guizhou        105.9097       26.2622          135       144     2012      03        23        083              0.231652      16.970917       0.000000       0.278881       0.110500       0.058000       0.048400       0.084000
57806     57806     guizhou        105.9097       26.2622          135       144     2012      03        24        084              0.226667       8.355194       0.000000       0.281530       0.094000       0.147900       0.045000       0.215000
57806     57806     guizhou        105.9097       26.2622          135       144     2012      03        25        085              0.000000      14.078430       0.000000       0.276420       0.090500   -9999.000000   -9999.000000   -9999.000000
57806     57806     guizhou        105.9097       26.2622          135       144     2012      03        26        086              0.219000      16.123657       0.000000       0.274054       0.094000       0.029000   -9999.000000       0.245000
57806     57806     guizhou        105.9097       26.2622          135       144     2012      03        27        087              0.228000      14.735535      18.303236       0.275108   -9999.000000   -9999.000000   -9999.000000   -9999.000000
57806     57806     guizhou        105.9097       26.2622          135       144     2012      03        28        088              0.264208      14.395660       3.517911       0.301211       0.139000   -9999.000000       0.065000       0.672000
57806     57806     guizhou        105.9097       26.2622          135       144     2012      03        29        089              0.273750      13.841309       4.051459       0.318479       0.129000       0.131300       0.062100       0.957000
57806     57806     guizhou        105.9097       26.2622          135       144     2012      03        30        090              0.273458      13.046448       6.175089       0.318273       0.117000   -9999.000000       0.049100       0.474000
57806     57806     guizhou        105.9097       26.2622          135       144     2012      03        31        091              0.273435      12.021179       0.000000       0.313564       0.104000       0.129000   -9999.000000       0.871000
57806     57806     guizhou        105.9097       26.2622          135       144     2012      04        01        092              0.265833      12.244202       0.000000       0.308843   -9999.000000       0.374900   -9999.000000   -9999.000000
57806     57806     guizhou        105.9097       26.2622          135       144     2012      04        02        093              0.261792      16.792633       0.224152       0.297625   -9999.000000   -9999.000000   -9999.000000       0.221000
57806     57806     guizhou        105.9097       26.2622          135       144     2012      04        03        094              0.256500      20.449463       0.000000       0.289928       0.111500       0.169600       0.056100   -9999.000000
57806     57806     guizhou        105.9097       26.2622          135       144     2012      04        04        095              0.250348      18.736084       0.122945       0.288502       0.101000   -9999.000000       0.060100       0.364000
57806     57806     guizhou        105.9097       26.2622          135       144     2012      04        05        096              0.244667      19.269287       0.185726       0.284630       0.101500       0.167300       0.047800       0.432000
57806     57806     guizhou        105.9097       26.2622          135       144     2012      04        06        097              0.239667      17.562500       0.161681       0.282088   -9999.000000       0.115300   -9999.000000   -9999.000000
57806     57806     guizhou        105.9097       26.2622          135       144     2012      04        07        098              0.236417      15.062988       0.000000       0.281687   -9999.000000   -9999.000000   -9999.000000       0.015000
57806     57806     guizhou        105.9097       26.2622          135       144     2012      04        08        099              0.255609      12.780975      13.378215       0.282805       0.123000       0.263200       0.069300   -9999.000000
57806     57806     guizhou        105.9097       26.2622          135       144     2012      04        09        100              0.267130      14.996216       0.172527       0.308868       0.109500   -9999.000000       0.068300       0.556000
57806     57806     guizhou        105.9097       26.2622          135       144     2012      04        10        101              0.257583      16.600281       0.338837       0.306296       0.099500       0.312800       0.074200       0.700000
57806     57806     guizhou        105.9097       26.2622          135       144     2012      04        11        102              0.250783      20.905792       0.000000       0.293514   -9999.000000       0.096800   -9999.000000   -9999.000000
57806     57806     guizhou        105.9097       26.2622          135       144     2012      04        12        103              0.247083      22.031677      12.041926       0.286332   -9999.000000   -9999.000000   -9999.000000       0.495000
57806     57806     guizhou        105.9097       26.2622          135       144     2012      04        13        104              0.243083      18.912415       0.655735       0.313784       0.131000       0.143800   -9999.000000   -9999.000000
57806     57806     guizhou        105.9097       26.2622          135       144     2012      04        14        105              0.238000      14.433197       0.092099       0.301078       0.108000   -9999.000000       0.065700       0.480000
57806     57806     guizhou        105.9097       26.2622          135       144     2012      04        15        106              0.235667      18.572693       0.000000       0.294129       0.093500   -9999.000000       0.066900       0.355000
57806     57806     guizhou        105.9097       26.2622          135       144     2012      04        16        107              0.230167      19.171906       0.000000       0.286944       0.093000       0.143900       0.077000       0.310000
57806     57806     guizhou        105.9097       26.2622          135       144     2012      04        17        108              0.225917      17.181824       0.000000       0.286391   -9999.000000   -9999.000000   -9999.000000       0.380000
57806     57806     guizhou        105.9097       26.2622          135       144     2012      04        18        109              0.220696      18.563354       0.000000       0.283257       0.121000       0.187300   -9999.000000   -9999.000000
57806     57806     guizhou        105.9097       26.2622          135       144     2012      04        19        110              0.223792      17.432281       5.883887       0.282560       0.114000       0.146200   -9999.000000       0.481000
57806     57806     guizhou        105.9097       26.2622          135       144     2012      04        20        111              0.232696      18.807281       0.339280       0.295949       0.093000   -9999.000000       0.080500   -9999.000000
57806     57806     guizhou        105.9097       26.2622          135       144     2012      04        21        112              0.226250      18.562653       1.749756       0.291147       0.080000       0.179500       0.084500       0.402000
57806     57806     guizhou        105.9097       26.2622          135       144     2012      04        22        113              0.224000      21.126892      15.927197       0.285005   -9999.000000   -9999.000000   -9999.000000       0.350000
57806     57806     guizhou        105.9097       26.2622          135       144     2012      04        23        114              0.224583      21.830841       0.000000       0.309208   -9999.000000   -9999.000000   -9999.000000   -9999.000000
57806     57806     guizhou        105.9097       26.2622          135       144     2012      04        24        115              0.216333      22.689148       0.000000       0.301487       0.105000       0.189700   -9999.000000       0.485000
57806     57806     guizhou        105.9097       26.2622          135       144     2012      04        25        116              0.000000      23.655304       0.000000       0.286481       0.106000   -9999.000000       0.091500   -9999.000000
57806     57806     guizhou        105.9097       26.2622          135       144     2012      04        26        117              0.204917      17.355743       4.733007       0.285045       0.102000       0.138900       0.097200       0.556000
57806     57806     guizhou        105.9097       26.2622          135       144     2012      04        27        118              0.199708      20.472687       0.115015       0.292345   -9999.000000   -9999.000000       0.084800       0.383000
57806     57806     guizhou        105.9097       26.2622          135       144     2012      04        28        119              0.200208      22.924469      17.516115       0.285212   -9999.000000       0.020500   -9999.000000       0.658000
57806     57806     guizhou        105.9097       26.2622          135       144     2012      04        29        120              0.202783      22.830139       0.000000       0.313271       0.111000       0.242700   -9999.000000       0.737000
57806     57806     guizhou        105.9097       26.2622          135       144     2012      04        30        121              0.195917      23.630981       0.000000       0.303647       0.099000   -9999.000000   -9999.000000   -9999.000000
57806     57806     guizhou        105.9097       26.2622          135       144     2012      05        01        122              0.189000      25.126587       0.000000       0.286714       0.131000       0.159900       0.109100       0.252000
57806     57806     guizhou        105.9097       26.2622          135       144     2012      05        02        123              0.182375      22.496429       0.594908       0.282968   -9999.000000       0.083700       0.117400   -9999.000000
57806     57806     guizhou        105.9097       26.2622          135       144     2012      05        03        124              0.179609      20.940399       0.256911       0.283843   -9999.000000   -9999.000000       0.097600       0.152000
57806     57806     guizhou        105.9097       26.2622          135       144     2012      05        04        125              0.175000      22.009827       0.000000       0.279997       0.158000       0.142700   -9999.000000       0.476000
57806     57806     guizhou        105.9097       26.2622          135       144     2012      05        05        126              0.172000      20.257294       0.573173       0.279542       0.138000   -9999.000000   -9999.000000   -9999.000000
57806     57806     guizhou        105.9097       26.2622          135       144     2012      05        06        127              0.170542      22.568390       1.536082       0.277192       0.127000       0.105600   -9999.000000       0.255000
57806     57806     guizhou        105.9097       26.2622          135       144     2012      05        07        128              0.167500      23.358734       0.000000       0.274829   -9999.000000   -9999.000000       0.079700   -9999.000000
57806     57806     guizhou        105.9097       26.2622          135       144     2012      05        08        129              0.167043      24.459747       3.849149       0.269790   -9999.000000   -9999.000000       0.095800       0.900000
57806     57806     guizhou        105.9097       26.2622          135       144     2012      05        09        130              0.170333      24.502686       2.956816       0.279832   -9999.000000       0.221900       0.072500       0.656000
57806     57806     guizhou        105.9097       26.2622          135       144     2012      05        10        131              0.171000      24.627777       3.013753       0.284052       0.163000   -9999.000000   -9999.000000   -9999.000000
57806     57806     guizhou        105.9097       26.2622          135       144     2012      05        11        132              0.168217      24.020844       7.526327       0.291530       0.130000       0.104500   -9999.000000       0.297000
57806     57806     guizhou        105.9097       26.2622          135       144     2012      05        12        133              0.194125      24.760773       6.566976       0.291036       0.158000       0.183600       0.096700   -9999.000000
57806     57806     guizhou        105.9097       26.2622          135       144     2012      05        13        134              0.201792      21.136658      29.214218       0.311657   -9999.000000   -9999.000000       0.106400       0.521000
57806     57806     guizhou        105.9097       26.2622          135       144     2012      05        14        135              0.218250      20.083984       0.117456       0.335040   -9999.000000       0.448900       0.077600       0.644000
57806     57806     guizhou        105.9097       26.2622          135       144     2012      05        15        136              0.214000      17.668365       0.000000       0.322183       0.171500   -9999.000000   -9999.000000       0.349000
57806     57806     guizhou        105.9097       26.2622          135       144     2012      05        16        137              0.211333      18.250793       0.947793       0.306106       0.159500       0.390500   -9999.000000       0.548000
57806     57806     guizhou        105.9097       26.2622          135       144     2012      05        17        138              0.208750      20.560089       0.604880       0.299074       0.164500       0.498700   -9999.000000   -9999.000000
57806     57806     guizhou        105.9097       26.2622          135       144     2012      05        18        139              0.216875      19.024902      37.786339       0.298159   -9999.000000   -9999.000000       0.096500       0.519000
57806     57806     guizhou        105.9097       26.2622          135       144     2012      05        19        140              0.232917      22.062256      12.147229       0.360954   -9999.000000       0.151700       0.077200   -9999.000000
57806     57806     guizhou        105.9097       26.2622          135       144     2012      05        20        141              0.227500      23.805206       4.779203       0.343275       0.172000   -9999.000000       0.086600       0.674000
57806     57806     guizhou        105.9097       26.2622          135       144     2012      05        21        142              0.352435      22.381042      53.476318       0.319104       0.134000   -9999.000000   -9999.000000       0.958000
57806     57806     guizhou        105.9097       26.2622          135       144     2012      05        22        143              0.422913      21.490173       2.483026       0.349991       0.155000       0.322700   -9999.000000   -9999.000000
57806     57806     guizhou        105.9097       26.2622          135       144     2012      05        23        144              0.414750      18.920746       0.982333       0.338451   -9999.000000   -9999.000000       0.075500       0.918000
57806     57806     guizhou        105.9097       26.2622          135       144     2012      05        24        145              0.419833      17.570740       0.517173       0.320449   -9999.000000       0.283300       0.074700   -9999.000000
57806     57806     guizhou        105.9097       26.2622          135       144     2012      05        25        146              0.000000      17.538605       3.698212       0.315169       0.172000       0.539900       0.072400       0.920000
57806     57806     guizhou        105.9097       26.2622          135       144     2012      05        26        147              0.415250      16.805420       0.000000       0.318959       0.142500   -9999.000000       0.063700       0.829000
57806     57806     guizhou        105.9097       26.2622          135       144     2012      05        27        148              0.411333      19.856964       3.250629       0.310134       0.135000       0.396000   -9999.000000       0.559000
57806     57806     guizhou        105.9097       26.2622          135       144     2012      05        28        149              0.414333      21.267517      12.894152       0.311042       0.125000   -9999.000000   -9999.000000       0.836000
57806     57806     guizhou        105.9097       26.2622          135       144     2012      05        29        150              0.437250      21.521545      25.500446       0.322146   -9999.000000       0.257600       0.079800   -9999.000000
57806     57806     guizhou        105.9097       26.2622          135       144     2012      05        30        151              0.421333      18.937378       0.800374       0.349886   -9999.000000       0.291500       0.076500   -9999.000000
57806     57806     guizhou        105.9097       26.2622          135       144     2012      05        31        152              0.417500      18.964874       1.988048       0.323299       0.157500   -9999.000000       0.065700   -9999.000000
57806     57806     guizhou        105.9097       26.2622          135       144     2012      06        01        153              0.425917      19.152222       8.559606       0.320046       0.198500       0.227500   -9999.000000       0.816000
57806     57806     guizhou        105.9097       26.2622          135       144     2012      06        02        154              0.438125      17.079529       4.352774       0.327897       0.187500   -9999.000000   -9999.000000       1.000000
57806     57806     guizhou        105.9097       26.2622          135       144     2012      06        03        155              0.439167      17.950867       8.892072       0.331361   -9999.000000       0.251300   -9999.000000   -9999.000000
57806     57806     guizhou        105.9097       26.2622          135       144     2012      06        04        156              0.437870      17.628662       2.918298       0.333202   -9999.000000       0.263500       0.045000       0.850000
57806     57806     guizhou        105.9097       26.2622          135       144     2012      06        05        157              0.427875      17.889557       1.761480       0.331485       0.189000   -9999.000000       0.050900   -9999.000000
57806     57806     guizhou        105.9097       26.2622          135       144     2012      06        06        158              0.443583      19.976105      34.073215       0.325112       0.157000       0.366600       0.044500       0.796000
57806     57806     guizhou        105.9097       26.2622          135       144     2012      06        07        159              0.446458      19.712769      14.384766       0.344544       0.169500   -9999.000000   -9999.000000       1.000000
57806     57806     guizhou        105.9097       26.2622          135       144     2012      06        08        160              0.436042      19.859253      22.385014       0.355623   -9999.000000       0.398500   -9999.000000   -9999.000000
57806     57806     guizhou        105.9097       26.2622          135       144     2012      06        09        161              0.444417      21.366364      16.353107       0.349905   -9999.000000       0.237600       0.047500       0.846000
57806     57806     guizhou        105.9097       26.2622          135       144     2012      06        10        162              0.440125      22.266479       5.024160       0.368115       0.205000   -9999.000000       0.046400   -9999.000000
57806     57806     guizhou        105.9097       26.2622          135       144     2012      06        11        163              0.000000      21.270660       3.055651       0.353430       0.155000       0.339200       0.072400       0.731000
57806     57806     guizhou        105.9097       26.2622          135       144     2012      06        12        164              0.334667      21.732361       1.041102       0.339604       0.145500       0.351400   -9999.000000       0.773000
57806     57806     guizhou        105.9097       26.2622          135       144     2012      06        13        165              0.318750      19.134186       3.202448       0.335692       0.126000   -9999.000000   -9999.000000       0.652000
57806     57806     guizhou        105.9097       26.2622          135       144     2012      06        14        166              0.318583      21.493378       1.532376       0.331601   -9999.000000       0.483900   -9999.000000       0.865000
57806     57806     guizhou        105.9097       26.2622          135       144     2012      06        15        167              0.311125      21.239349       0.213759       0.325873       0.145000   -9999.000000       0.059100   -9999.000000
57806     57806     guizhou        105.9097       26.2622          135       144     2012      06        16        168              0.307625      21.061584       0.000000       0.320571       0.132500       0.400000       0.057500       0.620000
57806     57806     guizhou        105.9097       26.2622          135       144     2012      06        17        169              0.301000      21.789276       0.410513       0.315557       0.132500       0.314300       0.053800   -9999.000000
57806     57806     guizhou        105.9097       26.2622          135       144     2012      06        18        170              0.309478      23.444366       8.711072       0.311548       0.122000   -9999.000000   -9999.000000       1.000000
57806     57806     guizhou        105.9097       26.2622          135       144     2012      06        19        171              0.333000      20.830322      14.504996       0.323682   -9999.000000       0.323900   -9999.000000       1.000000
57806     57806     guizhou        105.9097       26.2622          135       144     2012      06        20        172              0.318917      18.475586       0.000000       0.340782   -9999.000000   -9999.000000   -9999.000000   -9999.000000
57806     57806     guizhou        105.9097       26.2622          135       144     2012      06        21        173              0.326375      22.831696      23.998751       0.318728       0.179500       0.351900       0.065200       0.880000
57806     57806     guizhou        105.9097       26.2622          135       144     2012      06        22        174              0.337292      21.283447       8.701139       0.336188       0.165500       0.438000       0.060300   -9999.000000
57806     57806     guizhou        105.9097       26.2622          135       144     2012      06        23        175              0.320870      19.190216       0.000000       0.342771       0.141000   -9999.000000       0.052100       0.643000
57806     57806     guizhou        105.9097       26.2622          135       144     2012      06        24        176              0.327667      21.443939       0.534831       0.326852   -9999.000000       0.191300   -9999.000000       0.703000
57806     57806     guizhou        105.9097       26.2622          135       144     2012      06        25        177              0.338250      22.108704      45.603916       0.323935   -9999.000000   -9999.000000   -9999.000000       0.751000
57806     57806     guizhou        105.9097       26.2622          135       144     2012      06        26        178              0.335417      23.194977       1.035743       0.360754       0.157000       0.217600       0.095400       1.000000
57806     57806     guizhou        105.9097       26.2622          135       144     2012      06        27        179              0.338792      22.338776       9.968961       0.377652       0.157500       0.363100       0.096100   -9999.000000
57806     57806     guizhou        105.9097       26.2622          135       144     2012      06        28        180              0.338250      23.163544      17.440771       0.345438       0.157000   -9999.000000       0.095500       1.000000
57806     57806     guizhou        105.9097       26.2622          135       144     2012      06        29        181              0.327875      22.846039       2.864625       0.358479   -9999.000000       0.320800   -9999.000000   -9999.000000
57806     57806     guizhou        105.9097       26.2622          135       144     2012      06        30        182              0.321167      24.221588       1.375582       0.340078   -9999.000000       0.237800   -9999.000000   -9999.000000
57806     57806     guizhou        105.9097       26.2622          135       144     2012      07        01        183              0.317125      25.392944       1.094326       0.330278       0.189000   -9999.000000   -9999.000000       0.945000
57806     57806     guizhou        105.9097       26.2622          135       144     2012      07        02        184              0.311583      23.594147       0.311103       0.326427       0.177000       0.422600       0.070500   -9999.000000
57806     57806     guizhou        105.9097       26.2622          135       144     2012      07        03        185              0.308000      23.527161       0.000000       0.319188       0.165000   -9999.000000       0.068500       0.371000
57806     57806     guizhou        105.9097       26.2622          135       144     2012      07        04        186              0.302083      23.096405       2.923101       0.315440       0.155000       0.277800       0.063900   -9999.000000
57806     57806     guizhou        105.9097       26.2622          135       144     2012      07        05        187              0.294500      23.301300       0.178678       0.316986   -9999.000000   -9999.000000   -9999.000000       0.688000
57806     57806     guizhou        105.9097       26.2622          135       144     2012      07        06        188              0.285750      24.296967       0.000000       0.314143   -9999.000000   -9999.000000   -9999.000000       0.694000
57806     57806     guizhou        105.9097       26.2622          135       144     2012      07        07        189              0.278417      24.827454       0.000000       0.309110   -9999.000000       0.270700   -9999.000000   -9999.000000
57806     57806     guizhou        105.9097       26.2622          135       144     2012      07        08        190              0.277917      24.499908       0.000000       0.307296       0.155000   -9999.000000       0.063900       0.408000
57806     57806     guizhou        105.9097       26.2622          135       144     2012      07        09        191              0.269792      24.414642       0.000000       0.304858       0.152000       0.310400       0.076400   -9999.000000
57806     57806     guizhou        105.9097       26.2622          135       144     2012      07        10        192              0.259458      25.135956       4.811320       0.302326   -9999.000000       0.321000       0.064700       0.732000
57806     57806     guizhou        105.9097       26.2622          135       144     2012      07        11        193              0.248625      25.612396       3.222803       0.307099   -9999.000000   -9999.000000   -9999.000000       0.685000
57806     57806     guizhou        105.9097       26.2622          135       144     2012      07        12        194              0.288292      25.964874      71.353630       0.309665       0.258000       0.219500   -9999.000000       1.000000
57806     57806     guizhou        105.9097       26.2622          135       144     2012      07        13        195              0.325958      24.093231       4.268472       0.361970       0.243000   -9999.000000       0.071500       1.000000
57806     57806     guizhou        105.9097       26.2622          135       144     2012      07        14        196              0.314792      22.581573       1.514235       0.340883       0.234000       0.242800       0.083200   -9999.000000
57806     57806     guizhou        105.9097       26.2622          135       144     2012      07        15        197              0.321750      25.346771      40.617130       0.326341   -9999.000000       0.418600       0.069500       0.824000
57806     57806     guizhou        105.9097       26.2622          135       144     2012      07        16        198              0.357083      24.632355      49.643429       0.346971   -9999.000000   -9999.000000   -9999.000000   -9999.000000
57806     57806     guizhou        105.9097       26.2622          135       144     2012      07        17        199              0.351375      22.933228      34.200634       0.448346       0.324000       0.269200   -9999.000000       1.000000
57806     57806     guizhou        105.9097       26.2622          135       144     2012      07        18        200              0.347917      22.035187      24.748184       0.487542       0.277000       0.173100   -9999.000000       1.000000
57806     57806     guizhou        105.9097       26.2622          135       144     2012      07        19        201              0.339250      22.194000       5.152626       0.424085       0.239500   -9999.000000       0.068200   -9999.000000
57806     57806     guizhou        105.9097       26.2622          135       144     2012      07        20        202              0.325750      23.478638       0.408181       0.359114       0.203000       0.352600       0.067100       0.774000
57806     57806     guizhou        105.9097       26.2622          135       144     2012      07        21        203              0.318250      24.743713       1.242581       0.340967   -9999.000000   -9999.000000       0.060100   -9999.000000
57806     57806     guizhou        105.9097       26.2622          135       144     2012      07        22        204              0.333208      25.266785      20.902208       0.331237   -9999.000000       0.217100   -9999.000000       1.000000
57806     57806     guizhou        105.9097       26.2622          135       144     2012      07        23        205              0.325696      22.611786       0.170620       0.350077       0.307500   -9999.000000   -9999.000000       0.713000
57806     57806     guizhou        105.9097       26.2622          135       144     2012      07        24        206              0.329087      22.075043       6.304329       0.331325       0.325500   -9999.000000   -9999.000000       0.845000
57806     57806     guizhou        105.9097       26.2622          135       144     2012      07        25        207              0.344083      21.307648      13.954885       0.332728       0.291500       0.289600       0.071600       1.000000
57806     57806     guizhou        105.9097       26.2622          135       144     2012      07        26        208              0.331500      22.482300       8.787983       0.344513   -9999.000000   -9999.000000       0.071500   -9999.000000
57806     57806     guizhou        105.9097       26.2622          135       144     2012      07        27        209              0.333583      23.577209       6.465362       0.340922   -9999.000000       0.267500       0.053700       0.896000
57806     57806     guizhou        105.9097       26.2622          135       144     2012      07        28        210              0.329542      24.071533       6.250572       0.335728       0.304000       0.440400   -9999.000000   -9999.000000
57806     57806     guizhou        105.9097       26.2622          135       144     2012      07        29        211              0.332708      23.064087       1.080336       0.336089       0.274000   -9999.000000   -9999.000000       0.698000
57806     57806     guizhou        105.9097       26.2622          135       144     2012      07        30        212              0.323708      24.137665       0.000000       0.328622       0.260000       0.175000       0.102900       0.784000
57806     57806     guizhou        105.9097       26.2622          135       144     2012      07        31        213              0.317917      24.573853      21.082708       0.321785       0.227000   -9999.000000       0.100900   -9999.000000
57806     57806     guizhou        105.9097       26.2622          135       144     2012      08        01        214              0.312000      25.310242       9.330759       0.333057   -9999.000000       0.164800       0.089500       0.582000
57806     57806     guizhou        105.9097       26.2622          135       144     2012      08        02        215              0.307958      24.731384       0.833840       0.341796       0.393000       0.257400   -9999.000000   -9999.000000
57806     57806     guizhou        105.9097       26.2622          135       144     2012      08        03        216              0.299417      24.499237       0.000000       0.326813       0.364000   -9999.000000   -9999.000000       0.594000
57806     57806     guizhou        105.9097       26.2622          135       144     2012      08        04        217              0.288833      25.305450       1.978525       0.318483       0.342500       0.162900   -9999.000000       0.720000
57806     57806     guizhou        105.9097       26.2622          135       144     2012      08        05        218              0.276083      26.066650       3.614958       0.313005       0.337000       0.079600       0.103800   -9999.000000
57806     57806     guizhou        105.9097       26.2622          135       144     2012      08        06        219              0.274917      25.960022       4.150257       0.312088   -9999.000000   -9999.000000       0.136900       0.632000
57806     57806     guizhou        105.9097       26.2622          135       144     2012      08        07        220              0.296625      22.731750       5.281278       0.319963   -9999.000000       0.429000       0.113100   -9999.000000
57806     57806     guizhou        105.9097       26.2622          135       144     2012      08        08        221              0.299667      22.785614       0.536212       0.323074       0.359500   -9999.000000   -9999.000000       0.699000
57806     57806     guizhou        105.9097       26.2622          135       144     2012      08        09        222              0.290417      25.098602       0.000000       0.313732       0.340000       0.116800   -9999.000000       0.627000
57806     57806     guizhou        105.9097       26.2622          135       144     2012      08        10        223              0.282583      25.545105       0.000000       0.307067       0.324000   -9999.000000       0.130300       0.439000
57806     57806     guizhou        105.9097       26.2622          135       144     2012      08        11        224              0.269208      26.073242       0.000000       0.303022   -9999.000000   -9999.000000       0.126800       0.553000
57806     57806     guizhou        105.9097       26.2622          135       144     2012      08        12        225              0.257833      26.293457       0.000000       0.298817   -9999.000000       0.193200       0.128000   -9999.000000
57806     57806     guizhou        105.9097       26.2622          135       144     2012      08        13        226              0.247917      26.852264       7.518892       0.296362       0.254000   -9999.000000       0.112400       0.565000
57806     57806     guizhou        105.9097       26.2622          135       144     2012      08        14        227              0.269167      26.518829       4.612606       0.295518   -9999.000000       0.121700   -9999.000000   -9999.000000
57806     57806     guizhou        105.9097       26.2622          135       144     2012      08        15        228              0.291333      26.174408       0.402164       0.302080       0.231500       0.162500   -9999.000000       0.511000
57806     57806     guizhou        105.9097       26.2622          135       144     2012      08        16        229              0.286000      25.700897       0.000000       0.301653       0.194000   -9999.000000       0.126000       0.557000
57806     57806     guizhou        105.9097       26.2622          135       144     2012      08        17        230              0.277333      26.848633       0.722821       0.293771   -9999.000000       0.084400       0.131300   -9999.000000
57806     57806     guizhou        105.9097       26.2622          135       144     2012      08        18        231              0.277750      26.437378       6.774822       0.290704   -9999.000000   -9999.000000       0.122700       0.736000
57806     57806     guizhou        105.9097       26.2622          135       144     2012      08        19        232              0.280000      23.185486       0.000000       0.308483       0.261000       0.080700   -9999.000000   -9999.000000
57806     57806     guizhou        105.9097       26.2622          135       144     2012      08        20        233              0.292792      24.391663      52.518204       0.299174       0.206000       0.143600   -9999.000000       0.424000
57806     57806     guizhou        105.9097       26.2622          135       144     2012      08        21        234              0.317542      25.765350       0.000000       0.334369       0.237000   -9999.000000   -9999.000000       0.672000
57806     57806     guizhou        105.9097       26.2622          135       144     2012      08        22        235              0.307917      22.717285       0.000000       0.341720   -9999.000000       0.386200       0.122100   -9999.000000
57806     57806     guizhou        105.9097       26.2622          135       144     2012      08        23        236              0.300625      21.006622       0.000000       0.315919   -9999.000000       0.169900       0.131000       0.599000
57806     57806     guizhou        105.9097       26.2622          135       144     2012      08        24        237              0.293083      21.674286       0.000000       0.307437   -9999.000000   -9999.000000       0.110500   -9999.000000
57806     57806     guizhou        105.9097       26.2622          135       144     2012      08        25        238              0.000000      23.277069       0.000000       0.302612       0.253000       0.368300   -9999.000000       0.390000
57806     57806     guizhou        105.9097       26.2622          135       144     2012      08        26        239              0.279750      23.367371       0.000000       0.301682       0.251000   -9999.000000   -9999.000000   -9999.000000
57806     57806     guizhou        105.9097       26.2622          135       144     2012      08        27        240              0.273417      23.317810       0.000000       0.300305       0.216000       0.210100       0.093800       0.429000
57806     57806     guizhou        105.9097       26.2622          135       144     2012      08        28        241              0.273087      23.016449       2.333683       0.299313   -9999.000000       0.087400       0.084600       0.537000
57806     57806     guizhou        105.9097       26.2622          135       144     2012      08        29        242              0.303708      24.143188      14.096988       0.299731   -9999.000000   -9999.000000       0.098500   -9999.000000
57806     57806     guizhou        105.9097       26.2622          135       144     2012      08        30        243              0.313875      23.634796       8.553089       0.325728       0.265500       0.235900   -9999.000000       0.536000
57806     57806     guizhou        105.9097       26.2622          135       144     2012      08        31        244              0.306708      24.752686       1.908902       0.314582       0.263000   -9999.000000   -9999.000000   -9999.000000
57806     57806     guizhou        105.9097       26.2622          135       144     2012      09        01        245              0.304667      24.487274      19.758493       0.305747       0.208000       0.159300   -9999.000000       0.492000
57806     57806     guizhou        105.9097       26.2622          135       144     2012      09        02        246              0.317125      23.824402       0.933199       0.316368   -9999.000000       0.225600       0.091200       0.684000
57806     57806     guizhou        105.9097       26.2622          135       144     2012      09        03        247              0.309792      20.894806       0.000000       0.326163   -9999.000000   -9999.000000       0.144200   -9999.000000
57806     57806     guizhou        105.9097       26.2622          135       144     2012      09        04        248              0.303042      20.317566       0.000000       0.311982       0.231500       0.210300       0.127100       0.309000
57806     57806     guizhou        105.9097       26.2622          135       144     2012      09        05        249              0.298000      21.342407       0.000000       0.303550       0.217000   -9999.000000   -9999.000000   -9999.000000
57806     57806     guizhou        105.9097       26.2622          135       144     2012      09        06        250              0.292667      22.242065       2.387258       0.300431       0.219000       0.236100   -9999.000000       0.521000
57806     57806     guizhou        105.9097       26.2622          135       144     2012      09        07        251              0.360250      23.766693       1.274238       0.297599       0.191000       0.155600   -9999.000000       0.429000
57806     57806     guizhou        105.9097       26.2622          135       144     2012      09        08        252              0.390292      23.743988       0.000000       0.296110   -9999.000000   -9999.000000       0.138800       0.365000
57806     57806     guizhou        105.9097       26.2622          135       144     2012      09        09        253              0.383042      24.194763       0.248807       0.294087       0.233000       0.127700       0.145400       0.540000
57806     57806     guizhou        105.9097       26.2622          135       144     2012      09        10        254              0.378583      24.484711       0.823786       0.292829       0.229500       0.107000       0.058000   -9999.000000
57806     57806     guizhou        105.9097       26.2622          135       144     2012      09        11        255              0.410292      24.019653      79.948387       0.290774       0.138000   -9999.000000   -9999.000000       1.000000
57806     57806     guizhou        105.9097       26.2622          135       144     2012      09        12        256              0.439000      22.291138       2.431017       0.348398   -9999.000000       0.194000   -9999.000000   -9999.000000
57806     57806     guizhou        105.9097       26.2622          135       144     2012      09        13        257              0.443542      18.856628       4.360100       0.340190   -9999.000000   -9999.000000       0.072500       0.522000
57806     57806     guizhou        105.9097       26.2622          135       144     2012      09        14        258              0.433583      17.438263       0.000000       0.333359   -9999.000000       0.159200       0.065500       0.722000
57806     57806     guizhou        105.9097       26.2622          135       144     2012      09        15        259              0.427292      19.054565       0.000000       0.321980       0.147000       0.207200       0.061400   -9999.000000
57806     57806     guizhou        105.9097       26.2622          135       144     2012      09        16        260              0.428083      19.533142       2.826133       0.318283       0.166000   -9999.000000   -9999.000000       0.744000
57806     57806     guizhou        105.9097       26.2622          135       144     2012      09        17        261              0.430125      17.417938       1.160905       0.321876       0.161500       0.402500   -9999.000000   -9999.000000
57806     57806     guizhou        105.9097       26.2622          135       144     2012      09        18        262              0.433500      16.698242       1.722816       0.319958   -9999.000000   -9999.000000   -9999.000000       0.535000
57806     57806     guizhou        105.9097       26.2622          135       144     2012      09        19        263              0.431500      15.737762       0.950806       0.321977   -9999.000000       0.218600       0.048100       0.521000
57806     57806     guizhou        105.9097       26.2622          135       144     2012      09        20        264              0.445292      17.185486       5.981728       0.318613       0.201000       0.293200       0.059200       0.835000
57806     57806     guizhou        105.9097       26.2622          135       144     2012      09        21        265              0.449958      17.155365       2.865447       0.326234   -9999.000000   -9999.000000       0.042700       1.000000
57806     57806     guizhou        105.9097       26.2622          135       144     2012      09        22        266              0.442500      17.317078       1.458194       0.326942       0.150000       0.268200   -9999.000000   -9999.000000
57806     57806     guizhou        105.9097       26.2622          135       144     2012      09        23        267              0.442667      18.240601       1.535162       0.320655       0.147000   -9999.000000   -9999.000000       0.686000
57806     57806     guizhou        105.9097       26.2622          135       144     2012      09        24        268              0.446292      17.949036       2.543527       0.321385   -9999.000000       0.178100   -9999.000000   -9999.000000
57806     57806     guizhou        105.9097       26.2622          135       144     2012      09        25        269              0.444250      17.739258       1.685533       0.322759   -9999.000000       0.241200       0.056100       0.854000
57806     57806     guizhou        105.9097       26.2622          135       144     2012      09        26        270              0.446833      18.729492       1.621188       0.319977       0.152000   -9999.000000       0.055800       0.938000
57806     57806     guizhou        105.9097       26.2622          135       144     2012      09        27        271              0.439143      19.008698       1.349015       0.320971       0.149500       0.288500       0.046200   -9999.000000
57806     57806     guizhou        105.9097       26.2622          135       144     2012      09        28        272              0.439333      18.691406       0.895577       0.317495       0.139000   -9999.000000   -9999.000000       0.535000
57806     57806     guizhou        105.9097       26.2622          135       144     2012      09        29        273              0.432500      18.431274       0.000000       0.317405   -9999.000000   -9999.000000   -9999.000000   -9999.000000
57806     57806     guizhou        105.9097       26.2622          135       144     2012      09        30        274              0.427833      19.602692       0.271633       0.311103   -9999.000000   -9999.000000       0.048700       0.525000
57806     57806     guizhou        105.9097       26.2622          135       144     2012      10        01        275              0.424000      18.238678       0.249164       0.311679       0.097000   -9999.000000       0.034400       0.562000
57806     57806     guizhou        105.9097       26.2622          135       144     2012      10        02        276              0.421250      19.638275       2.168615       0.309971       0.094000       0.181700       0.030100   -9999.000000
57806     57806     guizhou        105.9097       26.2622          135       144     2012      10        03        277              0.448083      19.166840       2.883625       0.311671       0.101000       0.257900   -9999.000000       0.480000
57806     57806     guizhou        105.9097       26.2622          135       144     2012      10        04        278              0.460917      17.273041       7.637474       0.319162       0.100000   -9999.000000   -9999.000000   -9999.000000
57806     57806     guizhou        105.9097       26.2622          135       144     2012      10        05        279              0.457875      16.426605       5.928033       0.324099   -9999.000000       0.278100   -9999.000000       0.927000
57806     57806     guizhou        105.9097       26.2622          135       144     2012      10        06        280              0.450458      16.044556       0.608491       0.329212       0.110000   -9999.000000       0.038200       0.854000
57806     57806     guizhou        105.9097       26.2622          135       144     2012      10        07        281              0.443542      16.281067       0.219619       0.319457       0.105000       0.188900       0.042500       0.771000
57806     57806     guizhou        105.9097       26.2622          135       144     2012      10        08        282              0.440542      17.197601       2.350363       0.314844       0.105000       0.287700       0.029700       0.834000
57806     57806     guizhou        105.9097       26.2622          135       144     2012      10        09        283              0.454750      17.124481       2.829181       0.316013       0.101000   -9999.000000   -9999.000000   -9999.000000
57806     57806     guizhou        105.9097       26.2622          135       144     2012      10        10        284              0.445625      15.563629       0.942683       0.320434   -9999.000000       0.211400   -9999.000000       0.661000
57806     57806     guizhou        105.9097       26.2622          135       144     2012      10        11        285              0.446750      15.605499       4.978495       0.314727   -9999.000000   -9999.000000       0.040800   -9999.000000
57806     57806     guizhou        105.9097       26.2622          135       144     2012      10        12        286              0.468125      16.175873      17.972618       0.319573       0.178000       0.186800       0.037900   -9999.000000
57806     57806     guizhou        105.9097       26.2622          135       144     2012      10        13        287              0.457750      15.285675       1.431184       0.337445       0.156500       0.243900       0.039200       0.915000
57806     57806     guizhou        105.9097       26.2622          135       144     2012      10        14        288              0.448750      15.651215       0.129330       0.330010       0.145000   -9999.000000       0.030100   -9999.000000
57806     57806     guizhou        105.9097       26.2622          135       144     2012      10        15        289              0.443125      17.065247       0.544004       0.320080   -9999.000000       0.243400   -9999.000000       0.687000
57806     57806     guizhou        105.9097       26.2622          135       144     2012      10        16        290              0.436667      20.353760       0.300887       0.315785   -9999.000000   -9999.000000   -9999.000000   -9999.000000
57806     57806     guizhou        105.9097       26.2622          135       144     2012      10        17        291              0.433125      17.723328       0.000000       0.314334       0.148000       0.175800       0.053500       0.417000
57806     57806     guizhou        105.9097       26.2622          135       144     2012      10        18        292              0.429750      16.657013       0.000000       0.311166       0.143000       0.232500       0.057700       0.510000
57806     57806     guizhou        105.9097       26.2622          135       144     2012      10        19        293              0.426167      18.233154       0.479235       0.310118       0.135500   -9999.000000       0.052100       0.472000
57806     57806     guizhou        105.9097       26.2622          135       144     2012      10        20        294              0.422875      18.237885       0.000000       0.311228       0.121000       0.216900   -9999.000000       0.660000
57806     57806     guizhou        105.9097       26.2622          135       144     2012      10        21        295              0.418792      20.065735       3.617254       0.308854   -9999.000000       0.162300   -9999.000000   -9999.000000
57806     57806     guizhou        105.9097       26.2622          135       144     2012      10        22        296              0.429000      20.518890       0.862172       0.310400   -9999.000000   -9999.000000   -9999.000000       0.414000
57806     57806     guizhou        105.9097       26.2622          135       144     2012      10        23        297              0.426000      17.787628       0.824219       0.311622   -9999.000000       0.393900       0.060300   -9999.000000
57806     57806     guizhou        105.9097       26.2622          135       144     2012      10        24        298              0.427833      17.928650       0.277492       0.309242   -9999.000000   -9999.000000       0.062600       0.414000
57806     57806     guizhou        105.9097       26.2622          135       144     2012      10        25        299              0.000000      14.920013       5.375278       0.308593       0.105000       0.178500       0.050500       0.666000
57806     57806     guizhou        105.9097       26.2622          135       144     2012      10        26        300              0.424125      18.039398       0.289306       0.306691   -9999.000000       0.409800   -9999.000000   -9999.000000
57806     57806     guizhou        105.9097       26.2622          135       144     2012      10        27        301              0.422000      17.879608       0.229064       0.304603   -9999.000000   -9999.000000   -9999.000000       0.365000
57806     57806     guizhou        105.9097       26.2622          135       144     2012      10        28        302              0.000000      16.949127       0.363382       0.304747       0.125000       0.177900       0.060800   -9999.000000
57806     57806     guizhou        105.9097       26.2622          135       144     2012      10        29        303              0.422000      17.663239       2.277107       0.305111       0.115500   -9999.000000       0.091900       0.837000
57806     57806     guizhou        105.9097       26.2622          135       144     2012      10        30        304              0.422000      17.114929       0.424165       0.308485       0.116000       0.198100       0.093500       0.481000
57806     57806     guizhou        105.9097       26.2622          135       144     2012      10        31        305              0.422000      12.835938       1.417604       0.306424       0.102000       0.223700   -9999.000000   -9999.000000
57806     57806     guizhou        105.9097       26.2622          135       144     2012      11        01        306              0.417708      15.109253       0.000000       0.301340   -9999.000000   -9999.000000   -9999.000000       0.253000
57806     57806     guizhou        105.9097       26.2622          135       144     2012      11        02        307              0.411875      15.368225       2.564935       0.299550       0.128000       0.151900   -9999.000000   -9999.000000
57806     57806     guizhou        105.9097       26.2622          135       144     2012      11        03        308              0.408333      16.496918       1.304148       0.297701       0.127000   -9999.000000       0.085200       0.406000
57806     57806     guizhou        105.9097       26.2622          135       144     2012      11        04        309              0.403250      14.777588       0.740095       0.298430       0.127000       0.114600       0.099100       0.409000
57806     57806     guizhou        105.9097       26.2622          135       144     2012      11        05        310              0.421292      15.285919       3.758776       0.298582       0.137500       0.205600       0.079500       0.620000
57806     57806     guizhou        105.9097       26.2622          135       144     2012      11        06        311              0.442958      12.484528       2.251908       0.307463   -9999.000000   -9999.000000   -9999.000000       0.713000
57806     57806     guizhou        105.9097       26.2622          135       144     2012      11        07        312              0.453125      11.544586       1.140378       0.308778   -9999.000000       0.178700   -9999.000000   -9999.000000
57806     57806     guizhou        105.9097       26.2622          135       144     2012      11        08        313              0.448750      10.943512       0.458553       0.309014       0.152000       0.165100   -9999.000000       0.918000
57806     57806     guizhou        105.9097       26.2622          135       144     2012      11        09        314              0.446500      11.492645       0.000000       0.305058       0.128500   -9999.000000       0.081200   -9999.000000
57806     57806     guizhou        105.9097       26.2622          135       144     2012      11        10        315              0.440833      14.688507       0.000000       0.301462       0.122500       0.324000       0.085200       0.496000
57806     57806     guizhou        105.9097       26.2622          135       144     2012      11        11        316              0.435833      12.670898       0.227597       0.299410   -9999.000000   -9999.000000       0.072700       0.424000
57806     57806     guizhou        105.9097       26.2622          135       144     2012      11        12        317              0.433625      10.976166       0.457255       0.299636   -9999.000000       0.131900   -9999.000000   -9999.000000
57806     57806     guizhou        105.9097       26.2622          135       144     2012      11        13        318              0.000000      11.306519       0.000000       0.299874       0.097000       0.154900   -9999.000000       0.428000
57806     57806     guizhou        105.9097       26.2622          135       144     2012      11        14        319              0.430500      13.274323       0.000000       0.299059       0.100000   -9999.000000       0.106500   -9999.000000
57806     57806     guizhou        105.9097       26.2622          135       144     2012      11        15        320              0.428667      17.044098       1.425852       0.296623       0.091000       0.247400       0.109100       0.406000
57806     57806     guizhou        105.9097       26.2622          135       144     2012      11        16        321              0.440708      16.470581       4.247218       0.298109       0.089000   -9999.000000       0.095700       0.583000
57806     57806     guizhou        105.9097       26.2622          135       144     2012      11        17        322              0.000000      10.484344       0.471652       0.310275   -9999.000000       0.184500   -9999.000000       0.259000
57806     57806     guizhou        105.9097       26.2622          135       144     2012      11        18        323              0.434625      12.723328       1.056776       0.299756   -9999.000000       0.246300   -9999.000000       0.471000
57806     57806     guizhou        105.9097       26.2622          135       144     2012      11        19        324              0.437708      14.619629       0.839258       0.299264       0.110500   -9999.000000   -9999.000000   -9999.000000
57806     57806     guizhou        105.9097       26.2622          135       144     2012      11        20        325              0.440000      12.135284       0.000000       0.301875       0.095000       0.170200       0.070600       0.353000
57806     57806     guizhou        105.9097       26.2622          135       144     2012      11        21        326              0.436042      15.030029       0.000000       0.299442       0.082500   -9999.000000       0.071700   -9999.000000
57806     57806     guizhou        105.9097       26.2622          135       144     2012      11        22        327              0.433000      13.932526       0.000000       0.297788   -9999.000000       0.022800       0.060100       0.240000
57806     57806     guizhou        105.9097       26.2622          135       144     2012      11        23        328              0.432000      11.832062       0.260071       0.297024   -9999.000000       0.240400   -9999.000000       0.363000
57806     57806     guizhou        105.9097       26.2622          135       144     2012      11        24        329              0.434125       8.653534       0.407991       0.297699       0.098000   -9999.000000   -9999.000000   -9999.000000
57806     57806     guizhou        105.9097       26.2622          135       144     2012      11        25        330              0.434625       9.804688       0.000000       0.299778       0.094000       0.143500   -9999.000000       0.143000
57806     57806     guizhou        105.9097       26.2622          135       144     2012      11        26        331              0.432000       9.195038       0.000000       0.297920       0.087500       0.148600   -9999.000000   -9999.000000
57806     57806     guizhou        105.9097       26.2622          135       144     2012      11        27        332              0.432625       7.334137       1.214070       0.296258       0.090000   -9999.000000       0.071700       0.537000
57806     57806     guizhou        105.9097       26.2622          135       144     2012      11        28        333              0.435000       7.348785       0.409525       0.300023   -9999.000000       0.348400       0.058300       0.329000
57806     57806     guizhou        105.9097       26.2622          135       144     2012      11        29        334              0.438958       6.992981       0.743012       0.300064       0.101000   -9999.000000   -9999.000000       0.449000
57806     57806     guizhou        105.9097       26.2622          135       144     2012      11        30        335              0.441333       7.863281       1.206383       0.302273       0.100000       0.236600   -9999.000000       0.611000
57806     57806     guizhou        105.9097       26.2622          135       144     2012      12        01        336              0.444000       7.591644       0.141351       0.302628       0.129000       0.104000       0.067300   -9999.000000
57806     57806     guizhou        105.9097       26.2622          135       144     2012      12        02        337              0.441000       6.380524       0.000000       0.301137       0.108000   -9999.000000       0.071400       0.285000
57806     57806     guizhou        105.9097       26.2622          135       144     2012      12        03        338              0.437500       9.619415       0.000000       0.297928   -9999.000000       0.234800       0.059300       0.259000
57806     57806     guizhou        105.9097       26.2622          135       144     2012      12        04        339              0.435000       8.222687       0.000000       0.297325   -9999.000000   -9999.000000   -9999.000000       0.297000
57806     57806     guizhou        105.9097       26.2622          135       144     2012      12        05        340              0.433000       7.031891       0.000000       0.297787       0.137000       0.229300   -9999.000000       0.314000
57806     57806     guizhou        105.9097       26.2622          135       144     2012      12        06        341              0.432000       8.293945       0.000000       0.296003       0.120000       0.364500   -9999.000000   -9999.000000
57806     57806     guizhou        105.9097       26.2622          135       144     2012      12        07        342              0.430435      10.211365       0.000000       0.294809       0.127500   -9999.000000       0.071200       0.282000
57806     57806     guizhou        105.9097       26.2622          135       144     2012      12        08        343              0.429000       8.728424       0.871031       0.295596   -9999.000000       0.222100       0.079800   -9999.000000
57806     57806     guizhou        105.9097       26.2622          135       144     2012      12        09        344              0.433875       7.664734       1.569939       0.297619   -9999.000000   -9999.000000       0.067300       0.503000
57806     57806     guizhou        105.9097       26.2622          135       144     2012      12        10        345              0.440000       6.753235       0.414339       0.302983       0.137000       0.173600   -9999.000000       0.468000
57806     57806     guizhou        105.9097       26.2622          135       144     2012      12        11        346              0.439375       6.284454       0.273631       0.300573       0.124000       0.342100   -9999.000000   -9999.000000
57806     57806     guizhou        105.9097       26.2622          135       144     2012      12        12        347              0.441667       7.295868       0.921657       0.299419       0.120500   -9999.000000       0.089900       0.765000
57806     57806     guizhou        105.9097       26.2622          135       144     2012      12        13        348              0.441667       7.729431       0.000000       0.301379       0.096000       0.183500       0.080500   -9999.000000
57806     57806     guizhou        105.9097       26.2622          135       144     2012      12        14        349              0.436875      12.846527       0.000000       0.298437   -9999.000000       0.093600       0.082300       0.279000
57806     57806     guizhou        105.9097       26.2622          135       144     2012      12        15        350              0.000000      13.558258       0.120226       0.294404   -9999.000000   -9999.000000   -9999.000000       0.388000
57806     57806     guizhou        105.9097       26.2622          135       144     2012      12        16        351              0.429625      13.861084       0.000000       0.292889       0.113000       0.232200   -9999.000000       0.181000
57806     57806     guizhou        105.9097       26.2622          135       144     2012      12        17        352              0.426167      12.349762       0.000000       0.293478       0.113000   -9999.000000   -9999.000000       0.256000
57806     57806     guizhou        105.9097       26.2622          135       144     2012      12        18        353              0.423750       8.167725       0.000000       0.294113       0.110500       0.157400       0.051900   -9999.000000
57806     57806     guizhou        105.9097       26.2622          135       144     2012      12        19        354              0.421875       6.694733       0.242379       0.294091   -9999.000000       0.159000       0.065000       0.127000
57806     57806     guizhou        105.9097       26.2622          135       144     2012      12        20        355              0.000000       6.493195       0.452968       0.295052   -9999.000000   -9999.000000       0.050800   -9999.000000
57806     57806     guizhou        105.9097       26.2622          135       144     2012      12        21        356              0.422000       4.274170       0.281192       0.297690       0.140000       0.176200   -9999.000000       0.309000
57806     57806     guizhou        105.9097       26.2622          135       144     2012      12        22        357              0.425542       4.494965       0.666801       0.296949       0.126000   -9999.000000   -9999.000000       0.372000
57806     57806     guizhou        105.9097       26.2622          135       144     2012      12        23        358              0.432750       3.162659       0.853222       0.296387   -9999.000000       0.141800   -9999.000000   -9999.000000
57806     57806     guizhou        105.9097       26.2622          135       144     2012      12        24        359              0.431250       2.867706       0.616123       0.293929       0.107000       0.117800       0.082300       0.032000
57806     57806     guizhou        105.9097       26.2622          135       144     2012      12        25        360              0.430750       7.327301       1.140114       0.295031   -9999.000000   -9999.000000       0.092300   -9999.000000
57806     57806     guizhou        105.9097       26.2622          135       144     2012      12        26        361              0.000000       4.403778       0.927207       0.299136   -9999.000000       0.154800       0.079100       0.443000
57806     57806     guizhou        105.9097       26.2622          135       144     2012      12        27        362              0.444000       2.908966       0.239850       0.299199       0.122000   -9999.000000   -9999.000000       0.297000
57806     57806     guizhou        105.9097       26.2622          135       144     2012      12        28        363              0.440000       4.666351       0.268393       0.298805       0.121500       0.167000   -9999.000000   -9999.000000
57806     57806     guizhou        105.9097       26.2622          135       144     2012      12        29        364              0.000000       5.852936       0.000000       0.299095   -9999.000000       0.398000       0.072800       0.057000
57806     57806     guizhou        105.9097       26.2622          135       144     2012      12        30        365              0.000000       1.947174       0.794958       0.261636   -9999.000000   -9999.000000       0.077300   -9999.000000
57806     57806     guizhou        105.9097       26.2622          135       144     2012      12        31        366              0.437000       0.571869       0.277597       0.225911   -9999.000000   -9999.000000       0.049300       0.040000
