# Supplementary material for: Research on Fusing Multisatellite Soil Moisture Data Based on Bayesian Model Averaging
Source: Hindawi journal article supplement (doi:10.1155/2018/9310838), 2018-06-25
Supplement: f1 [file 9310838.f1.zip › 2012_sm00-10cm_daily_ZDB_ZHY_57822_366days_allin.txt]

57822     57822     guizhou        107.9014       26.9031          132       152     2012      01        01        001              0.000000   -9999.000000       1.375843   -9999.000000       0.090000       0.068300   -9999.000000   -9999.000000
57822     57822     guizhou        107.9014       26.9031          132       152     2012      01        02        002              0.208783       4.816803       6.066257       0.277730       0.095000   -9999.000000   -9999.000000       0.142000
57822     57822     guizhou        107.9014       26.9031          132       152     2012      01        03        003              0.000000       4.288940       4.054018       0.288139   -9999.000000   -9999.000000   -9999.000000   -9999.000000
57822     57822     guizhou        107.9014       26.9031          132       152     2012      01        04        004              0.257348       1.994720       2.233428       0.283620       0.098000   -9999.000000       0.043500       0.028000
57822     57822     guizhou        107.9014       26.9031          132       152     2012      01        05        005              0.260250       1.698914       0.517936       0.264258   -9999.000000   -9999.000000       0.043000   -9999.000000
57822     57822     guizhou        107.9014       26.9031          132       152     2012      01        06        006              0.259957       1.068054       0.776726       0.247043       0.098000   -9999.000000       0.038400       0.074000
57822     57822     guizhou        107.9014       26.9031          132       152     2012      01        07        007              0.261167       1.646698       0.261167       0.260738   -9999.000000       0.115200   -9999.000000       0.120000
57822     57822     guizhou        107.9014       26.9031          132       152     2012      01        08        008              0.000000       1.668152       0.339239       0.263532   -9999.000000   -9999.000000   -9999.000000   -9999.000000
57822     57822     guizhou        107.9014       26.9031          132       152     2012      01        09        009              0.252917       2.401154       0.211046       0.269710   -9999.000000       0.045700   -9999.000000       0.093000
57822     57822     guizhou        107.9014       26.9031          132       152     2012      01        10        010              0.248913       3.086639       1.991067       0.271631       0.102000       0.091600       0.041200   -9999.000000
57822     57822     guizhou        107.9014       26.9031          132       152     2012      01        11        011              0.247818       2.760681       0.279040       0.270285   -9999.000000   -9999.000000       0.044300       0.149000
57822     57822     guizhou        107.9014       26.9031          132       152     2012      01        12        012              0.263125       1.803223       2.915526       0.267798       0.080000       0.250000       0.040500       0.253000
57822     57822     guizhou        107.9014       26.9031          132       152     2012      01        13        013              0.266708       1.771240       1.617041       0.268550   -9999.000000   -9999.000000   -9999.000000   -9999.000000
57822     57822     guizhou        107.9014       26.9031          132       152     2012      01        14        014              0.272417       2.181671      10.885511       0.274950   -9999.000000       0.092000   -9999.000000       0.256000
57822     57822     guizhou        107.9014       26.9031          132       152     2012      01        15        015              0.265167       2.954498       0.335292       0.290095       0.077000   -9999.000000       0.041400   -9999.000000
57822     57822     guizhou        107.9014       26.9031          132       152     2012      01        16        016              0.256130       2.581909       0.183479       0.289685   -9999.000000   -9999.000000       0.043400       0.175000
57822     57822     guizhou        107.9014       26.9031          132       152     2012      01        17        017              0.000000       2.756989       4.624434       0.277800       0.082500       0.151900       0.039400   -9999.000000
57822     57822     guizhou        107.9014       26.9031          132       152     2012      01        18        018              0.267500       1.979034       1.986144       0.280846   -9999.000000   -9999.000000   -9999.000000       0.346000
57822     57822     guizhou        107.9014       26.9031          132       152     2012      01        19        019              0.269857       2.326538       1.778549       0.281250   -9999.000000   -9999.000000   -9999.000000       0.376000
57822     57822     guizhou        107.9014       26.9031          132       152     2012      01        20        020              0.273417       2.242676       3.088699       0.278079   -9999.000000   -9999.000000   -9999.000000   -9999.000000
57822     57822     guizhou        107.9014       26.9031          132       152     2012      01        21        021              0.271458       1.779572       0.654961       0.276846   -9999.000000   -9999.000000       0.041700       0.389000
57822     57822     guizhou        107.9014       26.9031          132       152     2012      01        22        022              0.260304       1.561676       1.923747       0.264923   -9999.000000   -9999.000000       0.035200   -9999.000000
57822     57822     guizhou        107.9014       26.9031          132       152     2012      01        23        023              0.249609       1.146576       0.000000       0.241561   -9999.000000   -9999.000000       0.042600       0.167000
57822     57822     guizhou        107.9014       26.9031          132       152     2012      01        24        024              0.249167       0.814911       0.187270       0.219714   -9999.000000   -9999.000000   -9999.000000       0.143000
57822     57822     guizhou        107.9014       26.9031          132       152     2012      01        25        025              0.250826       0.790680       0.755188       0.216199   -9999.000000       0.134900   -9999.000000   -9999.000000
57822     57822     guizhou        107.9014       26.9031          132       152     2012      01        26        026              0.249500       2.927063       0.000000       0.256778       0.097000   -9999.000000       0.048100       0.053000
57822     57822     guizhou        107.9014       26.9031          132       152     2012      01        27        027              0.246917       2.350952       0.000000       0.266409       0.092000       0.051600       0.047800   -9999.000000
57822     57822     guizhou        107.9014       26.9031          132       152     2012      01        28        028              0.245435       3.007477       0.061072       0.269852       0.086000       0.111500       0.043600       0.176000
57822     57822     guizhou        107.9014       26.9031          132       152     2012      01        29        029              0.241292       4.258698       0.000000       0.271623   -9999.000000   -9999.000000   -9999.000000       0.073000
57822     57822     guizhou        107.9014       26.9031          132       152     2012      01        30        030              0.236435       3.581665       0.000000       0.271250   -9999.000000       0.018900   -9999.000000   -9999.000000
57822     57822     guizhou        107.9014       26.9031          132       152     2012      01        31        031              0.233364       4.825348       0.000000       0.269308       0.085500   -9999.000000   -9999.000000       0.085000
57822     57822     guizhou        107.9014       26.9031          132       152     2012      02        01        032              0.229875       7.508331       0.627882       0.268646       0.081500       0.089000       0.060800   -9999.000000
57822     57822     guizhou        107.9014       26.9031          132       152     2012      02        02        033              0.231478       6.460815       0.217192       0.270725       0.079000       0.353500       0.057100       0.105000
57822     57822     guizhou        107.9014       26.9031          132       152     2012      02        03        034              0.238000       3.242706       0.296592       0.270136   -9999.000000   -9999.000000       0.049600   -9999.000000
57822     57822     guizhou        107.9014       26.9031          132       152     2012      02        04        035              0.242400       3.445099       0.665828       0.269732   -9999.000000       0.136600   -9999.000000       0.041000
57822     57822     guizhou        107.9014       26.9031          132       152     2012      02        05        036              0.268938       5.274017       1.048227       0.270939       0.090000   -9999.000000   -9999.000000       0.165000
57822     57822     guizhou        107.9014       26.9031          132       152     2012      02        06        037              0.267222       4.966797       2.011357       0.273465       0.083000       0.036500   -9999.000000   -9999.000000
57822     57822     guizhou        107.9014       26.9031          132       152     2012      02        07        038              0.255435       5.686462       0.561771       0.271046       0.082000       0.153500       0.045500       0.234000
57822     57822     guizhou        107.9014       26.9031          132       152     2012      02        08        039              0.238261       6.343933       0.000000       0.268194   -9999.000000   -9999.000000       0.045500   -9999.000000
57822     57822     guizhou        107.9014       26.9031          132       152     2012      02        09        040              0.230083       2.308289       0.000000       0.254087   -9999.000000   -9999.000000       0.041000   -9999.000000
57822     57822     guizhou        107.9014       26.9031          132       152     2012      02        10        041              0.234750       0.918701       0.173003       0.227301   -9999.000000   -9999.000000   -9999.000000   -9999.000000
57822     57822     guizhou        107.9014       26.9031          132       152     2012      02        11        042              0.236870       1.326508       0.262280       0.238336       0.095000   -9999.000000   -9999.000000   -9999.000000
57822     57822     guizhou        107.9014       26.9031          132       152     2012      02        12        043              0.243333       2.959686       0.895556       0.259073       0.098000       0.284500   -9999.000000       0.145000
57822     57822     guizhou        107.9014       26.9031          132       152     2012      02        13        044              0.266292       2.525848       0.910719       0.263464   -9999.000000   -9999.000000       0.038400   -9999.000000
57822     57822     guizhou        107.9014       26.9031          132       152     2012      02        14        045              0.270727       3.294586       0.549906       0.269481   -9999.000000       0.086800   -9999.000000       0.292000
57822     57822     guizhou        107.9014       26.9031          132       152     2012      02        15        046              0.266167       3.948822       0.075110       0.269997   -9999.000000   -9999.000000   -9999.000000   -9999.000000
57822     57822     guizhou        107.9014       26.9031          132       152     2012      02        16        047              0.259917       3.462769       0.778244       0.268070       0.098000   -9999.000000   -9999.000000       0.173000
57822     57822     guizhou        107.9014       26.9031          132       152     2012      02        17        048              0.253000       4.132965       0.000000       0.266764       0.096500       0.213300   -9999.000000       0.105000
57822     57822     guizhou        107.9014       26.9031          132       152     2012      02        18        049              0.000000       3.299347       0.000000       0.264442   -9999.000000   -9999.000000       0.035000   -9999.000000
57822     57822     guizhou        107.9014       26.9031          132       152     2012      02        19        050              0.259400       2.118805       1.386099       0.254757   -9999.000000       0.144000       0.042900       0.059000
57822     57822     guizhou        107.9014       26.9031          132       152     2012      02        20        051              0.263583       4.340088       2.896684       0.265041   -9999.000000       0.207500       0.031000   -9999.000000
57822     57822     guizhou        107.9014       26.9031          132       152     2012      02        21        052              0.277522       4.724854       2.273856       0.272687       0.071000   -9999.000000   -9999.000000       0.349000
57822     57822     guizhou        107.9014       26.9031          132       152     2012      02        22        053              0.275389       5.859589       1.598105       0.276707       0.068000       0.195600   -9999.000000       0.306000
57822     57822     guizhou        107.9014       26.9031          132       152     2012      02        23        054              0.000000       6.928009       1.368209       0.274932       0.065500   -9999.000000   -9999.000000   -9999.000000
57822     57822     guizhou        107.9014       26.9031          132       152     2012      02        24        055              0.276000       7.221893       2.815495       0.274076   -9999.000000       0.093300       0.041100       0.319000
57822     57822     guizhou        107.9014       26.9031          132       152     2012      02        25        056              0.270591       6.344269       0.149948       0.276526   -9999.000000       0.188000       0.040500   -9999.000000
57822     57822     guizhou        107.9014       26.9031          132       152     2012      02        26        057              0.264043       3.709442       0.071125       0.273565   -9999.000000   -9999.000000       0.031700       0.017000
57822     57822     guizhou        107.9014       26.9031          132       152     2012      02        27        058              0.257667       2.403931       3.181469       0.263684   -9999.000000       0.134500   -9999.000000   -9999.000000
57822     57822     guizhou        107.9014       26.9031          132       152     2012      02        28        059              0.253667       2.513611       0.759614       0.260228       0.069000   -9999.000000   -9999.000000       0.104000
57822     57822     guizhou        107.9014       26.9031          132       152     2012      02        29        060              0.000000   -9999.000000       0.051865   -9999.000000       0.064000       0.086800   -9999.000000   -9999.000000
57822     57822     guizhou        107.9014       26.9031          132       152     2012      03        01        061              0.261417       2.416809       0.601499       0.263357   -9999.000000       0.030600       0.036000   -9999.000000
57822     57822     guizhou        107.9014       26.9031          132       152     2012      03        02        062              0.271875       4.850586       3.211867       0.268043       0.107000   -9999.000000       0.035400       0.262000
57822     57822     guizhou        107.9014       26.9031          132       152     2012      03        03        063              0.280000       4.977173      13.482100       0.274390       0.106500       0.094700   -9999.000000   -9999.000000
57822     57822     guizhou        107.9014       26.9031          132       152     2012      03        04        064              0.276304       4.183472       0.415016       0.291511       0.105000       0.177800   -9999.000000       0.368000
57822     57822     guizhou        107.9014       26.9031          132       152     2012      03        05        065              0.275250       3.388489       0.646473       0.291427       0.098000   -9999.000000   -9999.000000       0.415000
57822     57822     guizhou        107.9014       26.9031          132       152     2012      03        06        066              0.279000       7.296326       1.173423       0.279126   -9999.000000       0.074200       0.042700   -9999.000000
57822     57822     guizhou        107.9014       26.9031          132       152     2012      03        07        067              0.000000       5.303375       2.613648       0.277831   -9999.000000   -9999.000000       0.048500       0.436000
57822     57822     guizhou        107.9014       26.9031          132       152     2012      03        08        068              0.278957       4.216614       1.095937       0.277700       0.113000       0.275400       0.040400   -9999.000000
57822     57822     guizhou        107.9014       26.9031          132       152     2012      03        09        069              0.273391       4.147095       0.341530       0.279803       0.106000       0.254200   -9999.000000       0.379000
57822     57822     guizhou        107.9014       26.9031          132       152     2012      03        10        070              0.267913       3.886108       0.203858       0.274964       0.097000   -9999.000000   -9999.000000       0.422000
57822     57822     guizhou        107.9014       26.9031          132       152     2012      03        11        071              0.259522       6.357330       0.000000       0.271672   -9999.000000       0.144900       0.045200   -9999.000000
57822     57822     guizhou        107.9014       26.9031          132       152     2012      03        12        072              0.249609       8.106445       0.000000       0.269430   -9999.000000   -9999.000000       0.038400       0.330000
57822     57822     guizhou        107.9014       26.9031          132       152     2012      03        13        073              0.246208       8.171112       0.000000       0.268325       0.080000       0.137900       0.041900   -9999.000000
57822     57822     guizhou        107.9014       26.9031          132       152     2012      03        14        074              0.236435      13.177734       1.484531       0.264718       0.095000       0.236700   -9999.000000       0.213000
57822     57822     guizhou        107.9014       26.9031          132       152     2012      03        15        075              0.246913      10.449707       1.757511       0.268456       0.090500   -9999.000000   -9999.000000   -9999.000000
57822     57822     guizhou        107.9014       26.9031          132       152     2012      03        16        076              0.258583      10.236908       0.910448       0.273396       0.085000       0.102300   -9999.000000       0.419000
57822     57822     guizhou        107.9014       26.9031          132       152     2012      03        17        077              0.265250      12.050812       0.470272       0.272952   -9999.000000   -9999.000000       0.041600       0.436000
57822     57822     guizhou        107.9014       26.9031          132       152     2012      03        18        078              0.264833      13.049164       0.362299       0.269858       0.085000       0.043600       0.037500   -9999.000000
57822     57822     guizhou        107.9014       26.9031          132       152     2012      03        19        079              0.258083      15.804993       0.000000       0.266747       0.083500       0.149600       0.056100       0.260000
57822     57822     guizhou        107.9014       26.9031          132       152     2012      03        20        080              0.241625      17.818298       0.000000       0.262864       0.088500   -9999.000000   -9999.000000   -9999.000000
57822     57822     guizhou        107.9014       26.9031          132       152     2012      03        21        081              0.236222      11.790131       0.795664       0.262206       0.084000       0.349100   -9999.000000       0.181000
57822     57822     guizhou        107.9014       26.9031          132       152     2012      03        22        082              0.256042      10.288910      12.278734       0.263775   -9999.000000   -9999.000000   -9999.000000       0.308000
57822     57822     guizhou        107.9014       26.9031          132       152     2012      03        23        083              0.273913       9.327362       0.641905       0.289122       0.088000   -9999.000000       0.062300   -9999.000000
57822     57822     guizhou        107.9014       26.9031          132       152     2012      03        24        084              0.264750       9.947510       0.092433       0.281329       0.081000       0.237700       0.054700       0.249000
57822     57822     guizhou        107.9014       26.9031          132       152     2012      03        25        085              0.000000      15.238159       0.400232       0.269016       0.078000   -9999.000000       0.056100   -9999.000000
57822     57822     guizhou        107.9014       26.9031          132       152     2012      03        26        086              0.241792      16.802246       0.257670       0.263748       0.079000       0.110100   -9999.000000   -9999.000000
57822     57822     guizhou        107.9014       26.9031          132       152     2012      03        27        087              0.240826      15.414978       3.635403       0.264292   -9999.000000       0.121200   -9999.000000       0.300000
57822     57822     guizhou        107.9014       26.9031          132       152     2012      03        28        088              0.284417      16.365265      10.136549       0.267690   -9999.000000   -9999.000000       0.071300       0.661000
57822     57822     guizhou        107.9014       26.9031          132       152     2012      03        29        089              0.294750      14.404449       8.297286       0.294596       0.099500       0.164700       0.066200       0.678000
57822     57822     guizhou        107.9014       26.9031          132       152     2012      03        30        090              0.290391      14.592346       1.998252       0.294233       0.090000   -9999.000000       0.064200   -9999.000000
57822     57822     guizhou        107.9014       26.9031          132       152     2012      03        31        091              0.275478      14.008423       6.333015       0.287476       0.082000       0.137300       0.058900       0.409000
57822     57822     guizhou        107.9014       26.9031          132       152     2012      04        01        092              0.255250      15.890167       0.000000       0.273808   -9999.000000       0.188100   -9999.000000   -9999.000000
57822     57822     guizhou        107.9014       26.9031          132       152     2012      04        02        093              0.234667      19.137421       0.225659       0.265873   -9999.000000   -9999.000000   -9999.000000       0.315000
57822     57822     guizhou        107.9014       26.9031          132       152     2012      04        03        094              0.209292      22.679871       0.000000       0.260858       0.095000       0.126600       0.055800       0.402000
57822     57822     guizhou        107.9014       26.9031          132       152     2012      04        04        095              0.193217      18.354523       0.277013       0.260014       0.088000   -9999.000000       0.061600   -9999.000000
57822     57822     guizhou        107.9014       26.9031          132       152     2012      04        05        096              0.182625      17.829712       0.568949       0.259409       0.084000       0.123900       0.052100       0.393000
57822     57822     guizhou        107.9014       26.9031          132       152     2012      04        06        097              0.174583      17.607849       2.134713       0.258732       0.081000       0.064400   -9999.000000   -9999.000000
57822     57822     guizhou        107.9014       26.9031          132       152     2012      04        07        098              0.194167      17.067993       0.645509       0.260714   -9999.000000   -9999.000000   -9999.000000       0.282000
57822     57822     guizhou        107.9014       26.9031          132       152     2012      04        08        099              0.204391      14.948853       6.409348       0.267292   -9999.000000       0.090300   -9999.000000       0.299000
57822     57822     guizhou        107.9014       26.9031          132       152     2012      04        09        100              0.233000      17.332977       0.532730       0.272145       0.098500       0.023500       0.043200   -9999.000000
57822     57822     guizhou        107.9014       26.9031          132       152     2012      04        10        101              0.267714      16.586731       2.156319       0.275355       0.090500   -9999.000000       0.043400       0.567000
57822     57822     guizhou        107.9014       26.9031          132       152     2012      04        11        102              0.291818      20.405945       1.709242       0.271970       0.089000       0.096100       0.037600   -9999.000000
57822     57822     guizhou        107.9014       26.9031          132       152     2012      04        12        103              0.294652      20.310120       3.915146       0.267781   -9999.000000   -9999.000000   -9999.000000       0.418000
57822     57822     guizhou        107.9014       26.9031          132       152     2012      04        13        104              0.289458      19.411377       0.883282       0.272218   -9999.000000       0.147300   -9999.000000   -9999.000000
57822     57822     guizhou        107.9014       26.9031          132       152     2012      04        14        105              0.279208      16.084198       0.046159       0.268566       0.112500       0.421500       0.045100       0.302000
57822     57822     guizhou        107.9014       26.9031          132       152     2012      04        15        106              0.272917      16.266388       0.000000       0.264016       0.101500   -9999.000000       0.044500       0.360000
57822     57822     guizhou        107.9014       26.9031          132       152     2012      04        16        107              0.266542      17.502289       0.000000       0.261215       0.085500       0.090700       0.087300   -9999.000000
57822     57822     guizhou        107.9014       26.9031          132       152     2012      04        17        108              0.244667      20.064819       6.665968       0.256033   -9999.000000   -9999.000000       0.079600       0.186000
57822     57822     guizhou        107.9014       26.9031          132       152     2012      04        18        109              0.234833      17.555939       0.000000       0.255425   -9999.000000       0.160000   -9999.000000   -9999.000000
57822     57822     guizhou        107.9014       26.9031          132       152     2012      04        19        110              0.240292      20.342987       7.003903       0.252127       0.094000       0.165200   -9999.000000       0.435000
57822     57822     guizhou        107.9014       26.9031          132       152     2012      04        20        111              0.273792      21.436920       0.161068       0.265367       0.098500   -9999.000000       0.082200       0.653000
57822     57822     guizhou        107.9014       26.9031          132       152     2012      04        21        112              0.257792      19.639496       1.004590       0.265638       0.102500       0.158100       0.077900   -9999.000000
57822     57822     guizhou        107.9014       26.9031          132       152     2012      04        22        113              0.235375      21.760101       0.348160       0.253780   -9999.000000   -9999.000000   -9999.000000       0.257000
57822     57822     guizhou        107.9014       26.9031          132       152     2012      04        23        114              0.218708      23.752594       0.000000       0.246842   -9999.000000   -9999.000000   -9999.000000   -9999.000000
57822     57822     guizhou        107.9014       26.9031          132       152     2012      04        24        115              0.205087      24.666443       0.549756       0.244626   -9999.000000       0.034400   -9999.000000       0.373000
57822     57822     guizhou        107.9014       26.9031          132       152     2012      04        25        116              0.000000      25.351227       1.040796       0.241675       0.136000   -9999.000000   -9999.000000       0.766000
57822     57822     guizhou        107.9014       26.9031          132       152     2012      04        26        117              0.235125      17.895233       3.784961       0.250124       0.116000       0.294800       0.122300       0.380000
57822     57822     guizhou        107.9014       26.9031          132       152     2012      04        27        118              0.280000      21.684265       4.312549       0.250103       0.106000       0.275300       0.114100       0.636000
57822     57822     guizhou        107.9014       26.9031          132       152     2012      04        28        119              0.291250      23.160461       1.341309       0.260975   -9999.000000   -9999.000000       0.116000   -9999.000000
57822     57822     guizhou        107.9014       26.9031          132       152     2012      04        29        120              0.286083      22.475250      43.243217       0.266330   -9999.000000       0.092700   -9999.000000       0.594000
57822     57822     guizhou        107.9014       26.9031          132       152     2012      04        30        121              0.297333      22.259064       1.366406       0.296731       0.128500   -9999.000000   -9999.000000   -9999.000000
57822     57822     guizhou        107.9014       26.9031          132       152     2012      05        01        122              0.282208      23.397552       0.302514       0.300282       0.196500       0.186700       0.085900       0.564000
57822     57822     guizhou        107.9014       26.9031          132       152     2012      05        02        123              0.274917      20.697693       4.272214       0.282360       0.175000       0.178900       0.089500       0.606000
57822     57822     guizhou        107.9014       26.9031          132       152     2012      05        03        124              0.289391      20.072296       7.505108       0.280673   -9999.000000   -9999.000000       0.085500   -9999.000000
57822     57822     guizhou        107.9014       26.9031          132       152     2012      05        04        125              0.300458      19.761993       0.852885       0.287352   -9999.000000       0.231300   -9999.000000       0.641000
57822     57822     guizhou        107.9014       26.9031          132       152     2012      05        05        126              0.290217      19.933136       0.000000       0.286819       0.190000   -9999.000000   -9999.000000   -9999.000000
57822     57822     guizhou        107.9014       26.9031          132       152     2012      05        06        127              0.281958      22.094971       0.085367       0.275079       0.167500       0.253800   -9999.000000       0.521000
57822     57822     guizhou        107.9014       26.9031          132       152     2012      05        07        128              0.262875      24.749603       0.000000       0.269211   -9999.000000       0.295300       0.153900       0.571000
57822     57822     guizhou        107.9014       26.9031          132       152     2012      05        08        129              0.241905      26.513306       4.056517       0.262917   -9999.000000   -9999.000000       0.158500   -9999.000000
57822     57822     guizhou        107.9014       26.9031          132       152     2012      05        09        130              0.285870      26.606415       7.345551       0.266717   -9999.000000       0.299100       0.145900       0.767000
57822     57822     guizhou        107.9014       26.9031          132       152     2012      05        10        131              0.282542      24.720764       0.074202       0.286053       0.176500   -9999.000000   -9999.000000   -9999.000000
57822     57822     guizhou        107.9014       26.9031          132       152     2012      05        11        132              0.271292      23.502777       6.502426       0.274319       0.165000       0.138000   -9999.000000       0.472000
57822     57822     guizhou        107.9014       26.9031          132       152     2012      05        12        133              0.298875      24.839600      28.858774       0.277911       0.196500       0.429900   -9999.000000   -9999.000000
57822     57822     guizhou        107.9014       26.9031          132       152     2012      05        13        134              0.303542      23.267914      47.481934       0.317884   -9999.000000   -9999.000000       0.177000       0.702000
57822     57822     guizhou        107.9014       26.9031          132       152     2012      05        14        135              0.302391      20.362640       4.031780       0.315108   -9999.000000       0.160200       0.103600       0.769000
57822     57822     guizhou        107.9014       26.9031          132       152     2012      05        15        136              0.297174      19.312653       0.166612       0.308768       0.178000       0.245600       0.092600   -9999.000000
57822     57822     guizhou        107.9014       26.9031          132       152     2012      05        16        137              0.283261      20.183472       0.235631       0.294245       0.167000   -9999.000000   -9999.000000       0.444000
57822     57822     guizhou        107.9014       26.9031          132       152     2012      05        17        138              0.267792      21.678101       0.891797       0.288798       0.165000       0.198600   -9999.000000   -9999.000000
57822     57822     guizhou        107.9014       26.9031          132       152     2012      05        18        139              0.243833      23.393951       3.514904       0.285566       0.161000   -9999.000000       0.092900       0.572000
57822     57822     guizhou        107.9014       26.9031          132       152     2012      05        19        140              0.243833      25.167358       0.000000       0.284418   -9999.000000       0.323400       0.090600       0.449000
57822     57822     guizhou        107.9014       26.9031          132       152     2012      05        20        141              0.225917      25.448303       0.077121       0.282784   -9999.000000       0.218300       0.090400   -9999.000000
57822     57822     guizhou        107.9014       26.9031          132       152     2012      05        21        142              0.222125      25.236237       7.453377       0.275598       0.217500   -9999.000000   -9999.000000       0.600000
57822     57822     guizhou        107.9014       26.9031          132       152     2012      05        22        143              0.295261      21.453735      17.341181       0.287400       0.212000       0.283300   -9999.000000   -9999.000000
57822     57822     guizhou        107.9014       26.9031          132       152     2012      05        23        144              0.299083      20.706940       6.596022       0.313134   -9999.000000   -9999.000000   -9999.000000       0.884000
57822     57822     guizhou        107.9014       26.9031          132       152     2012      05        24        145              0.310417      20.190613      36.974667       0.298750   -9999.000000       0.163700       0.084300       0.861000
57822     57822     guizhou        107.9014       26.9031          132       152     2012      05        25        146              0.000000      19.140350      10.093681       0.330114   -9999.000000       0.296000       0.076700       0.870000
57822     57822     guizhou        107.9014       26.9031          132       152     2012      05        26        147              0.295833      19.176941       0.471258       0.314791       0.197500   -9999.000000       0.074600       0.705000
57822     57822     guizhou        107.9014       26.9031          132       152     2012      05        27        148              0.289833      21.672394       2.296833       0.301609       0.183000       0.283000   -9999.000000   -9999.000000
57822     57822     guizhou        107.9014       26.9031          132       152     2012      05        28        149              0.297500      23.051270       0.863907       0.297658       0.176500   -9999.000000   -9999.000000       0.566000
57822     57822     guizhou        107.9014       26.9031          132       152     2012      05        29        150              0.301958      23.051910      14.386651       0.296419   -9999.000000       0.127700   -9999.000000   -9999.000000
57822     57822     guizhou        107.9014       26.9031          132       152     2012      05        30        151              0.292917      22.336273       0.217227       0.310682   -9999.000000   -9999.000000       0.071300   -9999.000000
57822     57822     guizhou        107.9014       26.9031          132       152     2012      05        31        152              0.274625      23.476532       1.818438       0.293342       0.188000   -9999.000000       0.078400   -9999.000000
57822     57822     guizhou        107.9014       26.9031          132       152     2012      06        01        153              0.305625      20.492279      10.795259       0.292454       0.206000       0.457600       0.073000   -9999.000000
57822     57822     guizhou        107.9014       26.9031          132       152     2012      06        02        154              0.291500      19.300018       2.276129       0.306071   -9999.000000   -9999.000000   -9999.000000       0.555000
57822     57822     guizhou        107.9014       26.9031          132       152     2012      06        03        155              0.302870      20.458862      10.695527       0.293095       0.242000   -9999.000000   -9999.000000   -9999.000000
57822     57822     guizhou        107.9014       26.9031          132       152     2012      06        04        156              0.308333      19.596649       2.120778       0.305115   -9999.000000       0.486300       0.070000       0.740000
57822     57822     guizhou        107.9014       26.9031          132       152     2012      06        05        157              0.301083      20.291718       0.462295       0.297897       0.225000   -9999.000000       0.078200       0.705000
57822     57822     guizhou        107.9014       26.9031          132       152     2012      06        06        158              0.305417      21.304688      14.984512       0.290375       0.225000       0.223100       0.071300   -9999.000000
57822     57822     guizhou        107.9014       26.9031          132       152     2012      06        07        159              0.316095      22.159851      25.229584       0.296078       0.207000       0.348700   -9999.000000       0.726000
57822     57822     guizhou        107.9014       26.9031          132       152     2012      06        08        160              0.309083      22.065399       4.239195       0.322325       0.212000   -9999.000000   -9999.000000   -9999.000000
57822     57822     guizhou        107.9014       26.9031          132       152     2012      06        09        161              0.319458      24.208801       3.680926       0.305109   -9999.000000       0.346700   -9999.000000       0.566000
57822     57822     guizhou        107.9014       26.9031          132       152     2012      06        10        162              0.315208      25.661835       2.157066       0.301724       0.211000   -9999.000000       0.070600   -9999.000000
57822     57822     guizhou        107.9014       26.9031          132       152     2012      06        11        163              0.000000      24.558899       2.989503       0.298675       0.162000       0.186700       0.069800       0.668000
57822     57822     guizhou        107.9014       26.9031          132       152     2012      06        12        164              0.302739      23.033752       0.379877       0.298520       0.154500       0.337700       0.063300       0.650000
57822     57822     guizhou        107.9014       26.9031          132       152     2012      06        13        165              0.300417      23.310059       1.594570       0.291504       0.150000   -9999.000000   -9999.000000   -9999.000000
57822     57822     guizhou        107.9014       26.9031          132       152     2012      06        14        166              0.300478      25.093170       1.143665       0.287385   -9999.000000       0.302700   -9999.000000       0.483000
57822     57822     guizhou        107.9014       26.9031          132       152     2012      06        15        167              0.281625      23.856018       0.244179       0.283654   -9999.000000   -9999.000000       0.066300   -9999.000000
57822     57822     guizhou        107.9014       26.9031          132       152     2012      06        16        168              0.248708      24.762878       0.000000       0.278585       0.141000   -9999.000000       0.060800       0.472000
57822     57822     guizhou        107.9014       26.9031          132       152     2012      06        17        169              0.219542      24.726959       0.153802       0.274018       0.138000       0.108200       0.065100       0.490000
57822     57822     guizhou        107.9014       26.9031          132       152     2012      06        18        170              0.197458      25.470917       0.690075       0.272676       0.144500   -9999.000000       0.060700   -9999.000000
57822     57822     guizhou        107.9014       26.9031          132       152     2012      06        19        171              0.193000      24.993103       0.989914       0.272613   -9999.000000       0.334900   -9999.000000       0.419000
57822     57822     guizhou        107.9014       26.9031          132       152     2012      06        20        172              0.184625      23.374939       0.000000       0.275718   -9999.000000       0.043800   -9999.000000   -9999.000000
57822     57822     guizhou        107.9014       26.9031          132       152     2012      06        21        173              0.188917      25.992554       4.332459       0.269936   -9999.000000   -9999.000000       0.070800       0.610000
57822     57822     guizhou        107.9014       26.9031          132       152     2012      06        22        174              0.253870      25.175903      32.395920       0.276501   -9999.000000       0.207200       0.071200       0.606000
57822     57822     guizhou        107.9014       26.9031          132       152     2012      06        23        175              0.290458      22.594025       1.827342       0.319871       0.175500   -9999.000000       0.063100       0.619000
57822     57822     guizhou        107.9014       26.9031          132       152     2012      06        24        176              0.279583      24.262848      12.888378       0.298032       0.172000       0.182500   -9999.000000       0.697000
57822     57822     guizhou        107.9014       26.9031          132       152     2012      06        25        177              0.304875      26.676331      21.869982       0.291149   -9999.000000       0.164400   -9999.000000   -9999.000000
57822     57822     guizhou        107.9014       26.9031          132       152     2012      06        26        178              0.310042      25.712982       4.125723       0.313121       0.179000   -9999.000000   -9999.000000       0.817000
57822     57822     guizhou        107.9014       26.9031          132       152     2012      06        27        179              0.310435      25.016449       1.451107       0.305483       0.182500       0.205400       0.121300   -9999.000000
57822     57822     guizhou        107.9014       26.9031          132       152     2012      06        28        180              0.302708      26.937836       1.381360       0.292407       0.174000   -9999.000000       0.131200       0.520000
57822     57822     guizhou        107.9014       26.9031          132       152     2012      06        29        181              0.303167      26.305145       0.823744       0.288291       0.163000       0.139400       0.112200       0.652000
57822     57822     guizhou        107.9014       26.9031          132       152     2012      06        30        182              0.281292      27.939545       0.818579       0.283284   -9999.000000       0.290500   -9999.000000   -9999.000000
57822     57822     guizhou        107.9014       26.9031          132       152     2012      07        01        183              0.251250      29.448334       0.652202       0.276185   -9999.000000   -9999.000000   -9999.000000       0.631000
57822     57822     guizhou        107.9014       26.9031          132       152     2012      07        02        184              0.219917      27.532074       0.000000       0.276271       0.218500       0.139500       0.067000   -9999.000000
57822     57822     guizhou        107.9014       26.9031          132       152     2012      07        03        185              0.189708      27.186371       0.000000       0.272381       0.212000   -9999.000000       0.065700       0.486000
57822     57822     guizhou        107.9014       26.9031          132       152     2012      07        04        186              0.168417      27.718506       0.512575       0.269791       0.209500       0.209600       0.061400       0.412000
57822     57822     guizhou        107.9014       26.9031          132       152     2012      07        05        187              0.172708      27.793488       0.000000       0.267755   -9999.000000       0.262800       0.059900   -9999.000000
57822     57822     guizhou        107.9014       26.9031          132       152     2012      07        06        188              0.165875      28.032654       0.000000       0.266346   -9999.000000   -9999.000000   -9999.000000       0.457000
57822     57822     guizhou        107.9014       26.9031          132       152     2012      07        07        189              0.155542      28.977966       0.000000       0.262494   -9999.000000       0.088400   -9999.000000   -9999.000000
57822     57822     guizhou        107.9014       26.9031          132       152     2012      07        08        190              0.146042      28.750275       0.000000       0.260342       0.208000   -9999.000000       0.058600       0.365000
57822     57822     guizhou        107.9014       26.9031          132       152     2012      07        09        191              0.141667      28.515991       0.000000       0.257615       0.197000   -9999.000000       0.101600   -9999.000000
57822     57822     guizhou        107.9014       26.9031          132       152     2012      07        10        192              0.138833      28.372772       3.211596       0.256116       0.194000       0.140200       0.091300       0.390000
57822     57822     guizhou        107.9014       26.9031          132       152     2012      07        11        193              0.142522      29.423462       0.173545       0.253534   -9999.000000   -9999.000000   -9999.000000       0.451000
57822     57822     guizhou        107.9014       26.9031          132       152     2012      07        12        194              0.153522      29.990784      36.800453       0.250682   -9999.000000       0.223600   -9999.000000   -9999.000000
57822     57822     guizhou        107.9014       26.9031          132       152     2012      07        13        195              0.298083      28.481995      28.723122       0.293890       0.241000       0.310400   -9999.000000       0.737000
57822     57822     guizhou        107.9014       26.9031          132       152     2012      07        14        196              0.295458      25.829071      31.035007       0.321322       0.221000   -9999.000000       0.102100   -9999.000000
57822     57822     guizhou        107.9014       26.9031          132       152     2012      07        15        197              0.296542      28.454803      14.108904       0.320071       0.244000       0.245400       0.103100       0.842000
57822     57822     guizhou        107.9014       26.9031          132       152     2012      07        16        198              0.303833      26.221771      18.725967       0.310388   -9999.000000   -9999.000000       0.144500       0.807000
57822     57822     guizhou        107.9014       26.9031          132       152     2012      07        17        199              0.305000      26.028900      26.475330       0.319494   -9999.000000       0.260300   -9999.000000   -9999.000000
57822     57822     guizhou        107.9014       26.9031          132       152     2012      07        18        200              0.305208      25.368530      14.231749       0.327824       0.274000       0.087600   -9999.000000       0.789000
57822     57822     guizhou        107.9014       26.9031          132       152     2012      07        19        201              0.297917      26.450897       1.933275       0.317050       0.240000   -9999.000000       0.143500   -9999.000000
57822     57822     guizhou        107.9014       26.9031          132       152     2012      07        20        202              0.282833      27.314240       0.000000       0.309854       0.221500       0.299000       0.139300       0.526000
57822     57822     guizhou        107.9014       26.9031          132       152     2012      07        21        203              0.254783      28.552368       0.000000       0.296306   -9999.000000   -9999.000000       0.139300       0.534000
57822     57822     guizhou        107.9014       26.9031          132       152     2012      07        22        204              0.218875      28.893585       1.648823       0.290771   -9999.000000       0.248900   -9999.000000       0.583000
57822     57822     guizhou        107.9014       26.9031          132       152     2012      07        23        205              0.278609      29.015106      52.608631       0.286999   -9999.000000       0.322600   -9999.000000       0.559000
57822     57822     guizhou        107.9014       26.9031          132       152     2012      07        24        206              0.301000      26.497589       9.916245       0.333686       0.353500   -9999.000000   -9999.000000   -9999.000000
57822     57822     guizhou        107.9014       26.9031          132       152     2012      07        25        207              0.302875      26.777435       6.407597       0.318703       0.338000       0.307500       0.113200       0.757000
57822     57822     guizhou        107.9014       26.9031          132       152     2012      07        26        208              0.291333      26.770294       4.463275       0.311409       0.303000       0.335100       0.111900   -9999.000000
57822     57822     guizhou        107.9014       26.9031          132       152     2012      07        27        209              0.277875      27.750702       3.726187       0.304981   -9999.000000       0.249100       0.102100       0.581000
57822     57822     guizhou        107.9014       26.9031          132       152     2012      07        28        210              0.276583      27.012482       6.843390       0.301644       0.336000       0.367800   -9999.000000       0.625000
57822     57822     guizhou        107.9014       26.9031          132       152     2012      07        29        211              0.267750      26.788177       0.110930       0.303633       0.318000   -9999.000000   -9999.000000   -9999.000000
57822     57822     guizhou        107.9014       26.9031          132       152     2012      07        30        212              0.250792      27.835602       0.000000       0.291495       0.308500       0.396100   -9999.000000       0.541000
57822     57822     guizhou        107.9014       26.9031          132       152     2012      07        31        213              0.227000      28.589508       1.871015       0.284295       0.296000       0.185700       0.148900   -9999.000000
57822     57822     guizhou        107.9014       26.9031          132       152     2012      08        01        214              0.196375      29.172455       9.322471       0.281012   -9999.000000   -9999.000000       0.146800       0.463000
57822     57822     guizhou        107.9014       26.9031          132       152     2012      08        02        215              0.176750      27.764496       1.644916       0.296108   -9999.000000       0.369200       0.130200       0.552000
57822     57822     guizhou        107.9014       26.9031          132       152     2012      08        03        216              0.161250      27.905212       0.000000       0.283656       0.260500   -9999.000000   -9999.000000   -9999.000000
57822     57822     guizhou        107.9014       26.9031          132       152     2012      08        04        217              0.147667      28.026245       0.439195       0.273839       0.288500       0.172100   -9999.000000       0.436000
57822     57822     guizhou        107.9014       26.9031          132       152     2012      08        05        218              0.145375      28.083740      14.594855       0.269848       0.328500       0.247300       0.157600   -9999.000000
57822     57822     guizhou        107.9014       26.9031          132       152     2012      08        06        219              0.159833      26.890106       3.650700       0.297164       0.339000   -9999.000000       0.170700       0.592000
57822     57822     guizhou        107.9014       26.9031          132       152     2012      08        07        220              0.174375      24.992493       3.902117       0.294545   -9999.000000       0.324100       0.154700   -9999.000000
57822     57822     guizhou        107.9014       26.9031          132       152     2012      08        08        221              0.187000      26.091644       0.000000       0.290856       0.296000   -9999.000000   -9999.000000       0.490000
57822     57822     guizhou        107.9014       26.9031          132       152     2012      08        09        222              0.176542      27.820679       0.000000       0.277660       0.294000       0.153000   -9999.000000       0.542000
57822     57822     guizhou        107.9014       26.9031          132       152     2012      08        10        223              0.158792      28.657440       0.000000       0.270656       0.290000   -9999.000000   -9999.000000   -9999.000000
57822     57822     guizhou        107.9014       26.9031          132       152     2012      08        11        224              0.143875      28.948608       1.814991       0.266643       0.222000   -9999.000000       0.157000       0.397000
57822     57822     guizhou        107.9014       26.9031          132       152     2012      08        12        225              0.187792      29.300232       2.076496       0.263394   -9999.000000       0.393500       0.159500   -9999.000000
57822     57822     guizhou        107.9014       26.9031          132       152     2012      08        13        226              0.178958      29.805817       0.410836       0.261257   -9999.000000   -9999.000000       0.140400       0.517000
57822     57822     guizhou        107.9014       26.9031          132       152     2012      08        14        227              0.168125      28.668579       1.139790       0.261587       0.261500   -9999.000000   -9999.000000       0.520000
57822     57822     guizhou        107.9014       26.9031          132       152     2012      08        15        228              0.165125      28.847809       1.763886       0.263868       0.258500       0.174800   -9999.000000   -9999.000000
57822     57822     guizhou        107.9014       26.9031          132       152     2012      08        16        229              0.205375      28.737213       1.419599       0.264553       0.230500   -9999.000000       0.149600       0.335000
57822     57822     guizhou        107.9014       26.9031          132       152     2012      08        17        230              0.190000      29.404541       2.163928       0.263651   -9999.000000       0.210300       0.147100   -9999.000000
57822     57822     guizhou        107.9014       26.9031          132       152     2012      08        18        231              0.181042      28.670715       1.958978       0.257003   -9999.000000       0.176500       0.149900       0.650000
57822     57822     guizhou        107.9014       26.9031          132       152     2012      08        19        232              0.189375      28.195923       0.722458       0.259018       0.256000   -9999.000000       0.134200       0.536000
57822     57822     guizhou        107.9014       26.9031          132       152     2012      08        20        233              0.171333      28.672516       3.503880       0.256410       0.246000       0.285100   -9999.000000       0.487000
57822     57822     guizhou        107.9014       26.9031          132       152     2012      08        21        234              0.163000      29.432922       4.006098       0.255823       0.336000   -9999.000000   -9999.000000       0.564000
57822     57822     guizhou        107.9014       26.9031          132       152     2012      08        22        235              0.169417      26.827820       0.309358       0.262972       0.344000       0.234200       0.115700   -9999.000000
57822     57822     guizhou        107.9014       26.9031          132       152     2012      08        23        236              0.156375      23.779999       0.000000       0.263701   -9999.000000       0.200000       0.125200       0.351000
57822     57822     guizhou        107.9014       26.9031          132       152     2012      08        24        237              0.142500      24.551941       0.000000       0.252849   -9999.000000   -9999.000000       0.110900   -9999.000000
57822     57822     guizhou        107.9014       26.9031          132       152     2012      08        25        238              0.000000      25.060730       0.000000       0.248430       0.314500       0.176200   -9999.000000       0.368000
57822     57822     guizhou        107.9014       26.9031          132       152     2012      08        26        239              0.133500      25.276337       0.000000       0.246343       0.292500   -9999.000000   -9999.000000       0.440000
57822     57822     guizhou        107.9014       26.9031          132       152     2012      08        27        240              0.139375      26.335205       0.000000       0.242639       0.299000       0.139000   -9999.000000   -9999.000000
57822     57822     guizhou        107.9014       26.9031          132       152     2012      08        28        241              0.145125      26.869171       0.586349       0.239223   -9999.000000       0.105300       0.092200       0.459000
57822     57822     guizhou        107.9014       26.9031          132       152     2012      08        29        242              0.143833      27.811646       1.806388       0.237379   -9999.000000   -9999.000000       0.092700   -9999.000000
57822     57822     guizhou        107.9014       26.9031          132       152     2012      08        30        243              0.143000      26.624054       0.045769       0.247807       0.281500       0.159900       0.083600       0.481000
57822     57822     guizhou        107.9014       26.9031          132       152     2012      08        31        244              0.137375      28.162781       0.398926       0.240776       0.288500       0.207900   -9999.000000       0.554000
57822     57822     guizhou        107.9014       26.9031          132       152     2012      09        01        245              0.132167      28.295807       2.566191       0.235716       0.218000       0.127800   -9999.000000   -9999.000000
57822     57822     guizhou        107.9014       26.9031          132       152     2012      09        02        246              0.129500      27.828949       4.409966       0.238652       0.218000       0.247200       0.095200       0.489000
57822     57822     guizhou        107.9014       26.9031          132       152     2012      09        03        247              0.126458      25.285004       0.394603       0.262032   -9999.000000   -9999.000000       0.136300   -9999.000000
57822     57822     guizhou        107.9014       26.9031          132       152     2012      09        04        248              0.131375      22.673828       0.000000       0.252192       0.216000       0.408200       0.128700       0.313000
57822     57822     guizhou        107.9014       26.9031          132       152     2012      09        05        249              0.125958      24.756836       0.171386       0.243199       0.212500       0.140000       0.119800   -9999.000000
57822     57822     guizhou        107.9014       26.9031          132       152     2012      09        06        250              0.126167      24.735168       0.000000       0.240999       0.219500   -9999.000000   -9999.000000       0.382000
57822     57822     guizhou        107.9014       26.9031          132       152     2012      09        07        251              0.126417      26.331848       0.000000       0.237495       0.192000       0.156100   -9999.000000       0.491000
57822     57822     guizhou        107.9014       26.9031          132       152     2012      09        08        252              0.124130      27.588959       0.000000       0.233070   -9999.000000   -9999.000000       0.130400   -9999.000000
57822     57822     guizhou        107.9014       26.9031          132       152     2012      09        09        253              0.123500      27.854095       0.815397       0.229623   -9999.000000       0.201600       0.131900       0.319000
57822     57822     guizhou        107.9014       26.9031          132       152     2012      09        10        254              0.122583      28.400879       0.306234       0.228577       0.231000       0.217000       0.173700   -9999.000000
57822     57822     guizhou        107.9014       26.9031          132       152     2012      09        11        255              0.119458      27.386688       1.808170       0.227614       0.132500   -9999.000000   -9999.000000       0.426000
57822     57822     guizhou        107.9014       26.9031          132       152     2012      09        12        256              0.246917      27.451202      18.072393       0.229110       0.169000       0.336600   -9999.000000       0.759000
57822     57822     guizhou        107.9014       26.9031          132       152     2012      09        13        257              0.287042      23.151733       4.353112       0.290654   -9999.000000   -9999.000000   -9999.000000   -9999.000000
57822     57822     guizhou        107.9014       26.9031          132       152     2012      09        14        258              0.261667      19.773682       0.000000       0.281489   -9999.000000       0.218900       0.189800       0.277000
57822     57822     guizhou        107.9014       26.9031          132       152     2012      09        15        259              0.233875      21.632141       0.066488       0.261812       0.136000       0.267900       0.165400   -9999.000000
57822     57822     guizhou        107.9014       26.9031          132       152     2012      09        16        260              0.228667      22.236664       9.380528       0.253229       0.156000   -9999.000000       0.191600       0.600000
57822     57822     guizhou        107.9014       26.9031          132       152     2012      09        17        261              0.241958      18.481232       0.000000       0.281579       0.157500       0.153400   -9999.000000       0.425000
57822     57822     guizhou        107.9014       26.9031          132       152     2012      09        18        262              0.240958      19.685760       0.323338       0.266404   -9999.000000   -9999.000000   -9999.000000       0.431000
57822     57822     guizhou        107.9014       26.9031          132       152     2012      09        19        263              0.236625      20.489807       0.000000       0.261740   -9999.000000       0.155600       0.100300       0.427000
57822     57822     guizhou        107.9014       26.9031          132       152     2012      09        20        264              0.249125      22.875092      13.055459       0.254344   -9999.000000       0.062800       0.109500   -9999.000000
57822     57822     guizhou        107.9014       26.9031          132       152     2012      09        21        265              0.287208      20.927582       3.463284       0.283927   -9999.000000   -9999.000000       0.105600       0.685000
57822     57822     guizhou        107.9014       26.9031          132       152     2012      09        22        266              0.293458      21.079498      29.381674       0.285626       0.210500       0.405800   -9999.000000   -9999.000000
57822     57822     guizhou        107.9014       26.9031          132       152     2012      09        23        267              0.300792      21.132294      22.027653       0.307525       0.206500       0.229400   -9999.000000       0.742000
57822     57822     guizhou        107.9014       26.9031          132       152     2012      09        24        268              0.298125      20.301758       4.505417       0.316742   -9999.000000   -9999.000000   -9999.000000       0.696000
57822     57822     guizhou        107.9014       26.9031          132       152     2012      09        25        269              0.290833      20.291565       0.982202       0.295430   -9999.000000       0.476400       0.091500   -9999.000000
57822     57822     guizhou        107.9014       26.9031          132       152     2012      09        26        270              0.290739      21.265228       1.364247       0.283541       0.188500   -9999.000000       0.089600       0.707000
57822     57822     guizhou        107.9014       26.9031          132       152     2012      09        27        271              0.286143      21.815338       0.385490       0.279642       0.185500       0.393400       0.085300   -9999.000000
57822     57822     guizhou        107.9014       26.9031          132       152     2012      09        28        272              0.271800      21.489258       0.000000       0.272900       0.175000   -9999.000000   -9999.000000       0.430000
57822     57822     guizhou        107.9014       26.9031          132       152     2012      09        29        273              0.261833      21.512390       0.614141       0.266864       0.161000   -9999.000000   -9999.000000       0.539000
57822     57822     guizhou        107.9014       26.9031          132       152     2012      09        30        274              0.235500      22.140961       0.000000       0.260379   -9999.000000   -9999.000000   -9999.000000   -9999.000000
57822     57822     guizhou        107.9014       26.9031          132       152     2012      10        01        275              0.204958      21.538361       0.000000       0.256495       0.087000   -9999.000000       0.093600       0.389000
57822     57822     guizhou        107.9014       26.9031          132       152     2012      10        02        276              0.181208      22.212555       3.355514       0.253306       0.091000       0.149600       0.103500   -9999.000000
57822     57822     guizhou        107.9014       26.9031          132       152     2012      10        03        277              0.202875      22.673584       9.189953       0.257892       0.108000       0.222600       0.095300       0.576000
57822     57822     guizhou        107.9014       26.9031          132       152     2012      10        04        278              0.290333      19.324463      14.931975       0.283247       0.109000   -9999.000000   -9999.000000   -9999.000000
57822     57822     guizhou        107.9014       26.9031          132       152     2012      10        05        279              0.294250      18.221344       5.311321       0.305896   -9999.000000       0.221500   -9999.000000       0.687000
57822     57822     guizhou        107.9014       26.9031          132       152     2012      10        06        280              0.282083      18.111481       0.531447       0.294231   -9999.000000   -9999.000000       0.101700       0.691000
57822     57822     guizhou        107.9014       26.9031          132       152     2012      10        07        281              0.278750      18.045776       0.133820       0.280165       0.111500       0.171700       0.109500   -9999.000000
57822     57822     guizhou        107.9014       26.9031          132       152     2012      10        08        282              0.279458      18.118927       3.310166       0.275174       0.113500       0.203000       0.065800       0.581000
57822     57822     guizhou        107.9014       26.9031          132       152     2012      10        09        283              0.289333      17.959137       0.931102       0.276053       0.094500   -9999.000000   -9999.000000   -9999.000000
57822     57822     guizhou        107.9014       26.9031          132       152     2012      10        10        284              0.279167      18.409058       0.000000       0.280072   -9999.000000       0.425800   -9999.000000       0.471000
57822     57822     guizhou        107.9014       26.9031          132       152     2012      10        11        285              0.271625      19.112762       0.000000       0.272247   -9999.000000       0.146900   -9999.000000       0.528000
57822     57822     guizhou        107.9014       26.9031          132       152     2012      10        12        286              0.267500      18.180878       7.103497       0.269569       0.169000   -9999.000000       0.070900   -9999.000000
57822     57822     guizhou        107.9014       26.9031          132       152     2012      10        13        287              0.286792      17.444214       1.524533       0.276468       0.160000       0.196900       0.070000       0.597000
57822     57822     guizhou        107.9014       26.9031          132       152     2012      10        14        288              0.290250      17.680389       1.425167       0.284698       0.164500   -9999.000000       0.064000   -9999.000000
57822     57822     guizhou        107.9014       26.9031          132       152     2012      10        15        289              0.286333      17.345703       1.900476       0.280371       0.144000       0.228200   -9999.000000       0.683000
57822     57822     guizhou        107.9014       26.9031          132       152     2012      10        16        290              0.282792      17.809784       0.237212       0.276056   -9999.000000       0.077600   -9999.000000       0.696000
57822     57822     guizhou        107.9014       26.9031          132       152     2012      10        17        291              0.265667      19.372345       0.000000       0.275982   -9999.000000   -9999.000000   -9999.000000       0.270000
57822     57822     guizhou        107.9014       26.9031          132       152     2012      10        18        292              0.247458      18.222809       0.000000       0.266946       0.143500       0.261200       0.127400       0.430000
57822     57822     guizhou        107.9014       26.9031          132       152     2012      10        19        293              0.232875      19.567413       0.000000       0.263865       0.147000   -9999.000000       0.125900   -9999.000000
57822     57822     guizhou        107.9014       26.9031          132       152     2012      10        20        294              0.222167      19.347717       0.000000       0.264847       0.136500       0.288700       0.115800       0.511000
57822     57822     guizhou        107.9014       26.9031          132       152     2012      10        21        295              0.209125      22.177277       5.331740       0.262724   -9999.000000       0.308100   -9999.000000   -9999.000000
57822     57822     guizhou        107.9014       26.9031          132       152     2012      10        22        296              0.289458      23.408234       7.738168       0.266153   -9999.000000   -9999.000000   -9999.000000       0.604000
57822     57822     guizhou        107.9014       26.9031          132       152     2012      10        23        297              0.272917      18.794891       1.069083       0.291200   -9999.000000       0.194400       0.062200       0.457000
57822     57822     guizhou        107.9014       26.9031          132       152     2012      10        24        298              0.281333      17.364746       3.702086       0.275649   -9999.000000   -9999.000000       0.066600   -9999.000000
57822     57822     guizhou        107.9014       26.9031          132       152     2012      10        25        299              0.000000      16.264893       0.095760       0.283662       0.168500       0.130100       0.057000       0.616000
57822     57822     guizhou        107.9014       26.9031          132       152     2012      10        26        300              0.268458      17.878387       0.051029       0.273335       0.161000       0.329000   -9999.000000   -9999.000000
57822     57822     guizhou        107.9014       26.9031          132       152     2012      10        27        301              0.264500      17.767273       0.000000       0.270349   -9999.000000   -9999.000000   -9999.000000       0.410000
57822     57822     guizhou        107.9014       26.9031          132       152     2012      10        28        302              0.000000      18.849609       6.485227       0.267945       0.175000       0.374500   -9999.000000       0.410000
57822     57822     guizhou        107.9014       26.9031          132       152     2012      10        29        303              0.302042      19.941650      15.845026       0.279625       0.185000   -9999.000000       0.146500   -9999.000000
57822     57822     guizhou        107.9014       26.9031          132       152     2012      10        30        304              0.280750      19.054413       1.615169       0.303329       0.171500   -9999.000000       0.145700       0.380000
57822     57822     guizhou        107.9014       26.9031          132       152     2012      10        31        305              0.268083      16.923889       0.000000       0.284530       0.156000       0.405300       0.137900   -9999.000000
57822     57822     guizhou        107.9014       26.9031          132       152     2012      11        01        306              0.254333      16.922272       0.000000       0.274682   -9999.000000   -9999.000000   -9999.000000       0.287000
57822     57822     guizhou        107.9014       26.9031          132       152     2012      11        02        307              0.237708      17.051788       0.267496       0.270640   -9999.000000       0.230000   -9999.000000   -9999.000000
57822     57822     guizhou        107.9014       26.9031          132       152     2012      11        03        308              0.236583      18.387848       1.839075       0.267885       0.148000       0.202500       0.145600       0.403000
57822     57822     guizhou        107.9014       26.9031          132       152     2012      11        04        309              0.229125      17.853943       1.942149       0.273977       0.138000   -9999.000000       0.147300       0.387000
57822     57822     guizhou        107.9014       26.9031          132       152     2012      11        05        310              0.278958      17.752350      19.401804       0.272061       0.154500       0.216200       0.059500   -9999.000000
57822     57822     guizhou        107.9014       26.9031          132       152     2012      11        06        311              0.295500      13.906433      18.320641       0.307177   -9999.000000   -9999.000000       0.058500       0.655000
57822     57822     guizhou        107.9014       26.9031          132       152     2012      11        07        312              0.301417      13.206390       7.950614       0.310200   -9999.000000       0.142300   -9999.000000   -9999.000000
57822     57822     guizhou        107.9014       26.9031          132       152     2012      11        08        313              0.289083      12.982086       0.483568       0.304863       0.174000       0.392900   -9999.000000       0.506000
57822     57822     guizhou        107.9014       26.9031          132       152     2012      11        09        314              0.289250      12.631683       0.630900       0.290184       0.170000   -9999.000000       0.061300       0.560000
57822     57822     guizhou        107.9014       26.9031          132       152     2012      11        10        315              0.281083      11.661957       0.000000       0.284231       0.148000       0.291900       0.059300   -9999.000000
57822     57822     guizhou        107.9014       26.9031          132       152     2012      11        11        316              0.268500      13.748627       0.000000       0.280641       0.114000   -9999.000000       0.057500       0.200000
57822     57822     guizhou        107.9014       26.9031          132       152     2012      11        12        317              0.259583      14.085632       1.432446       0.277507   -9999.000000       0.203000   -9999.000000   -9999.000000
57822     57822     guizhou        107.9014       26.9031          132       152     2012      11        13        318              0.000000      12.879608       0.000000       0.277313   -9999.000000       0.074200   -9999.000000       0.420000
57822     57822     guizhou        107.9014       26.9031          132       152     2012      11        14        319              0.253500      14.416229       1.549750       0.276635       0.130500   -9999.000000   -9999.000000       0.422000
57822     57822     guizhou        107.9014       26.9031          132       152     2012      11        15        320              0.266833      15.676514       7.661744       0.278679       0.134500       0.109800       0.128100       0.538000
57822     57822     guizhou        107.9014       26.9031          132       152     2012      11        16        321              0.292000      13.643768      10.087659       0.291479       0.120000       0.251100       0.125600       0.645000
57822     57822     guizhou        107.9014       26.9031          132       152     2012      11        17        322              0.000000      11.350311       0.000000       0.304201   -9999.000000   -9999.000000       0.116900   -9999.000000
57822     57822     guizhou        107.9014       26.9031          132       152     2012      11        18        323              0.266750      13.315735       0.000000       0.284480   -9999.000000       0.436600   -9999.000000       0.409000
57822     57822     guizhou        107.9014       26.9031          132       152     2012      11        19        324              0.260000      13.933075       0.214771       0.279414       0.130000   -9999.000000   -9999.000000   -9999.000000
57822     57822     guizhou        107.9014       26.9031          132       152     2012      11        20        325              0.258250      12.536407       1.369439       0.278816       0.138500       0.528300       0.059000       0.407000
57822     57822     guizhou        107.9014       26.9031          132       152     2012      11        21        326              0.265792      11.722961       0.384471       0.281124       0.103000       0.208200       0.061900       0.437000
57822     57822     guizhou        107.9014       26.9031          132       152     2012      11        22        327              0.263333      11.834259       0.000000       0.280362       0.098000   -9999.000000       0.054600   -9999.000000
57822     57822     guizhou        107.9014       26.9031          132       152     2012      11        23        328              0.258917      11.149353       0.000000       0.278805   -9999.000000       0.398000   -9999.000000       0.268000
57822     57822     guizhou        107.9014       26.9031          132       152     2012      11        24        329              0.254333       9.699890       0.260202       0.276789       0.115000   -9999.000000   -9999.000000   -9999.000000
57822     57822     guizhou        107.9014       26.9031          132       152     2012      11        25        330              0.263125       8.544861       2.738766       0.276796       0.107500       0.145600   -9999.000000       0.282000
57822     57822     guizhou        107.9014       26.9031          132       152     2012      11        26        331              0.277375       9.257782       0.132804       0.279428       0.099500   -9999.000000   -9999.000000       0.365000
57822     57822     guizhou        107.9014       26.9031          132       152     2012      11        27        332              0.268125       8.980957       0.280571       0.281026       0.102000   -9999.000000       0.049000   -9999.000000
57822     57822     guizhou        107.9014       26.9031          132       152     2012      11        28        333              0.267083       8.523712       0.333477       0.277428   -9999.000000       0.139400       0.047700       0.286000
57822     57822     guizhou        107.9014       26.9031          132       152     2012      11        29        334              0.264167       9.736145       0.783306       0.275866   -9999.000000   -9999.000000   -9999.000000   -9999.000000
57822     57822     guizhou        107.9014       26.9031          132       152     2012      11        30        335              0.277625       8.527954       4.397102       0.276600       0.111500       0.237500   -9999.000000       0.439000
57822     57822     guizhou        107.9014       26.9031          132       152     2012      12        01        336              0.287667       7.335754       0.158981       0.283411       0.131000       0.239800   -9999.000000   -9999.000000
57822     57822     guizhou        107.9014       26.9031          132       152     2012      12        02        337              0.278708       7.710144       0.685446       0.281539       0.112000   -9999.000000       0.050300       0.255000
57822     57822     guizhou        107.9014       26.9031          132       152     2012      12        03        338              0.269708       9.005280       1.446478       0.276400   -9999.000000       0.129300       0.064100       0.265000
57822     57822     guizhou        107.9014       26.9031          132       152     2012      12        04        339              0.261083      10.079559       1.036655       0.273312   -9999.000000   -9999.000000       0.062500   -9999.000000
57822     57822     guizhou        107.9014       26.9031          132       152     2012      12        05        340              0.252333       7.844360       0.000000       0.272729       0.119000   -9999.000000   -9999.000000       0.083000
57822     57822     guizhou        107.9014       26.9031          132       152     2012      12        06        341              0.246208      10.114777       0.000000       0.270391       0.119000       0.167600   -9999.000000   -9999.000000
57822     57822     guizhou        107.9014       26.9031          132       152     2012      12        07        342              0.242750      10.673248       0.000000       0.268980       0.119500   -9999.000000       0.064000       0.273000
57822     57822     guizhou        107.9014       26.9031          132       152     2012      12        08        343              0.239500       9.045807       0.764448       0.269465       0.115000       0.366100       0.070000       0.266000
57822     57822     guizhou        107.9014       26.9031          132       152     2012      12        09        344              0.245043       9.715790       9.053643       0.270752   -9999.000000       0.214500       0.062200   -9999.000000
57822     57822     guizhou        107.9014       26.9031          132       152     2012      12        10        345              0.272250       7.727844       0.442393       0.287142   -9999.000000   -9999.000000   -9999.000000       0.281000
57822     57822     guizhou        107.9014       26.9031          132       152     2012      12        11        346              0.267375       6.513428       0.922617       0.284653       0.135500       0.221800   -9999.000000   -9999.000000
57822     57822     guizhou        107.9014       26.9031          132       152     2012      12        12        347              0.277125       6.651367       0.953119       0.277783       0.134000   -9999.000000   -9999.000000       0.475000
57822     57822     guizhou        107.9014       26.9031          132       152     2012      12        13        348              0.285500       6.419220       0.000000       0.277424       0.116000       0.118800       0.063600       0.500000
57822     57822     guizhou        107.9014       26.9031          132       152     2012      12        14        349              0.280167      12.779266       0.163127       0.273920   -9999.000000       0.323800       0.069800       0.321000
57822     57822     guizhou        107.9014       26.9031          132       152     2012      12        15        350              0.000000      13.292877       0.085272       0.270307   -9999.000000   -9999.000000       0.058400       0.277000
57822     57822     guizhou        107.9014       26.9031          132       152     2012      12        16        351              0.265375       9.446838       0.000000       0.269797       0.129000       0.251300   -9999.000000   -9999.000000
57822     57822     guizhou        107.9014       26.9031          132       152     2012      12        17        352              0.261417       8.486389       0.195011       0.269307       0.128000   -9999.000000   -9999.000000       0.307000
57822     57822     guizhou        107.9014       26.9031          132       152     2012      12        18        353              0.258167       6.454437       0.000000       0.269184       0.127000       0.243500       0.069100   -9999.000000
57822     57822     guizhou        107.9014       26.9031          132       152     2012      12        19        354              0.262542       5.323761       3.809512       0.268017       0.128000       0.177400       0.068600       0.267000
57822     57822     guizhou        107.9014       26.9031          132       152     2012      12        20        355              0.000000       3.946198       2.414425       0.273679   -9999.000000   -9999.000000       0.065200       0.406000
57822     57822     guizhou        107.9014       26.9031          132       152     2012      12        21        356              0.278917       3.213348       0.677378       0.282009   -9999.000000       0.332800       0.059400   -9999.000000
57822     57822     guizhou        107.9014       26.9031          132       152     2012      12        22        357              0.268750       3.885956       0.000000       0.274900       0.120000       0.166200   -9999.000000       0.278000
57822     57822     guizhou        107.9014       26.9031          132       152     2012      12        23        358              0.257667       3.645020       0.000000       0.270572       0.105000       0.202100   -9999.000000   -9999.000000
57822     57822     guizhou        107.9014       26.9031          132       152     2012      12        24        359              0.250263       4.916534       0.571891       0.267430       0.101000       0.286700       0.074100       0.123000
57822     57822     guizhou        107.9014       26.9031          132       152     2012      12        25        360              0.256417       6.906342       2.180253       0.268051   -9999.000000   -9999.000000       0.077700       0.047000
57822     57822     guizhou        107.9014       26.9031          132       152     2012      12        26        361              0.000000       3.983185       0.292384       0.271492   -9999.000000       0.162300       0.072100   -9999.000000
57822     57822     guizhou        107.9014       26.9031          132       152     2012      12        27        362              0.283625       2.476868       0.498249       0.271048       0.115000   -9999.000000   -9999.000000       0.225000
57822     57822     guizhou        107.9014       26.9031          132       152     2012      12        28        363              0.277000       2.768982       5.566829       0.270158       0.117500   -9999.000000   -9999.000000   -9999.000000
57822     57822     guizhou        107.9014       26.9031          132       152     2012      12        29        364              0.000000       3.002655       2.930956       0.278408   -9999.000000       0.240500   -9999.000000       0.069000
57822     57822     guizhou        107.9014       26.9031          132       152     2012      12        30        365              0.000000       1.937378       4.461978       0.280443   -9999.000000   -9999.000000       0.072900   -9999.000000
57822     57822     guizhou        107.9014       26.9031          132       152     2012      12        31        366              0.272933       3.537842       1.809309       0.283435   -9999.000000       0.327700       0.055300   -9999.000000
