# Supplementary material for: Research on Fusing Multisatellite Soil Moisture Data Based on Bayesian Model Averaging
Source: Hindawi journal article supplement (doi:10.1155/2018/9310838), 2018-06-25
Supplement: f1 [file 9310838.f1.zip › 2012_sm00-10cm_daily_ZDB_ZHY_57824_366days_allin.txt]

57824     57824     guizhou        107.2342       26.5861          134       149     2012      01        01        001              0.000000   -9999.000000       1.640200   -9999.000000       0.106000       0.308700   -9999.000000   -9999.000000
57824     57824     guizhou        107.2342       26.5861          134       149     2012      01        02        002              0.278000       3.663361       1.939906       0.280034   -9999.000000       0.077100   -9999.000000       0.221000
57824     57824     guizhou        107.2342       26.5861          134       149     2012      01        03        003              0.000000       3.723389       1.564940       0.287236   -9999.000000   -9999.000000   -9999.000000   -9999.000000
57824     57824     guizhou        107.2342       26.5861          134       149     2012      01        04        004              0.278000       1.705688       0.160273       0.266851   -9999.000000   -9999.000000       0.032300       0.057000
57824     57824     guizhou        107.2342       26.5861          134       149     2012      01        05        005              0.279875       0.780640       2.105516       0.224823   -9999.000000   -9999.000000       0.036700   -9999.000000
57824     57824     guizhou        107.2342       26.5861          134       149     2012      01        06        006              0.281000       0.350220       1.184269       0.197025   -9999.000000   -9999.000000       0.032700       0.190000
57824     57824     guizhou        107.2342       26.5861          134       149     2012      01        07        007              0.282500       0.920197       0.285540       0.226015   -9999.000000       0.222200   -9999.000000       0.216000
57824     57824     guizhou        107.2342       26.5861          134       149     2012      01        08        008              0.000000       0.869873       0.807289       0.225917   -9999.000000   -9999.000000   -9999.000000   -9999.000000
57824     57824     guizhou        107.2342       26.5861          134       149     2012      01        09        009              0.286826       1.551666       0.261634       0.249445       0.113000       0.257500   -9999.000000       0.191000
57824     57824     guizhou        107.2342       26.5861          134       149     2012      01        10        010              0.287000       2.543610       1.751198       0.266754       0.121500       0.161700       0.035100   -9999.000000
57824     57824     guizhou        107.2342       26.5861          134       149     2012      01        11        011              0.288826       2.210083       1.016522       0.267229   -9999.000000   -9999.000000       0.029700       0.130000
57824     57824     guizhou        107.2342       26.5861          134       149     2012      01        12        012              0.290000       1.547821       1.289237       0.259769       0.080000       0.077500   -9999.000000   -9999.000000
57824     57824     guizhou        107.2342       26.5861          134       149     2012      01        13        013              0.290000       2.203308       0.972020       0.269462   -9999.000000   -9999.000000   -9999.000000       0.391000
57824     57824     guizhou        107.2342       26.5861          134       149     2012      01        14        014              0.291500       2.378845       2.577650       0.276042   -9999.000000       0.191900   -9999.000000       0.344000
57824     57824     guizhou        107.2342       26.5861          134       149     2012      01        15        015              0.296348       2.833038       0.000000       0.282906       0.088000   -9999.000000       0.031300   -9999.000000
57824     57824     guizhou        107.2342       26.5861          134       149     2012      01        16        016              0.301091       2.928650       0.614515       0.280959       0.084000   -9999.000000       0.040000       0.260000
57824     57824     guizhou        107.2342       26.5861          134       149     2012      01        17        017              0.000000       5.073822       1.877516       0.279714   -9999.000000       0.041300       0.033000   -9999.000000
57824     57824     guizhou        107.2342       26.5861          134       149     2012      01        18        018              0.306917       1.944397       1.145512       0.276212   -9999.000000   -9999.000000   -9999.000000       0.415000
57824     57824     guizhou        107.2342       26.5861          134       149     2012      01        19        019              0.311476       1.967255       0.780946       0.271531   -9999.000000   -9999.000000   -9999.000000       0.337000
57824     57824     guizhou        107.2342       26.5861          134       149     2012      01        20        020              0.316583       1.965424       0.739198       0.270405   -9999.000000       0.076400       0.040700   -9999.000000
57824     57824     guizhou        107.2342       26.5861          134       149     2012      01        21        021              0.322667       1.635651       0.461204       0.264335   -9999.000000   -9999.000000       0.035500       0.358000
57824     57824     guizhou        107.2342       26.5861          134       149     2012      01        22        022              0.324000       1.256561       0.000000       0.249380   -9999.000000   -9999.000000       0.033800   -9999.000000
57824     57824     guizhou        107.2342       26.5861          134       149     2012      01        23        023              0.324000       0.444336       0.476852       0.204941   -9999.000000   -9999.000000       0.027600       0.363000
57824     57824     guizhou        107.2342       26.5861          134       149     2012      01        24        024              0.324000       0.273560       0.181305       0.185430   -9999.000000   -9999.000000   -9999.000000       0.366000
57824     57824     guizhou        107.2342       26.5861          134       149     2012      01        25        025              0.321391       0.201355       0.698721       0.181288   -9999.000000       0.205700   -9999.000000       0.332000
57824     57824     guizhou        107.2342       26.5861          134       149     2012      01        26        026              0.320000       0.929199       0.000000       0.210773   -9999.000000   -9999.000000       0.032100       0.277000
57824     57824     guizhou        107.2342       26.5861          134       149     2012      01        27        027              0.319375       1.332153       1.020366       0.229728       0.104000       0.224000       0.036100   -9999.000000
57824     57824     guizhou        107.2342       26.5861          134       149     2012      01        28        028              0.317000       1.964691       0.000000       0.253303       0.096000   -9999.000000       0.025700       0.299000
57824     57824     guizhou        107.2342       26.5861          134       149     2012      01        29        029              0.317000       2.893463       0.717330       0.264212   -9999.000000   -9999.000000   -9999.000000   -9999.000000
57824     57824     guizhou        107.2342       26.5861          134       149     2012      01        30        030              0.315609       2.052277       0.119916       0.259528   -9999.000000   -9999.000000   -9999.000000       0.090000
57824     57824     guizhou        107.2342       26.5861          134       149     2012      01        31        031              0.315000       2.548431       0.000000       0.262623       0.097000   -9999.000000   -9999.000000       0.239000
57824     57824     guizhou        107.2342       26.5861          134       149     2012      02        01        032              0.312913       5.832794       0.170639       0.270916       0.082500       0.042300       0.035300   -9999.000000
57824     57824     guizhou        107.2342       26.5861          134       149     2012      02        02        033              0.312000       5.874725       0.503098       0.273341       0.081000       0.151900       0.033800       0.140000
57824     57824     guizhou        107.2342       26.5861          134       149     2012      02        03        034              0.310783       2.628906       0.679468       0.268240   -9999.000000   -9999.000000       0.029900   -9999.000000
57824     57824     guizhou        107.2342       26.5861          134       149     2012      02        04        035              0.308000       5.185852       0.305970       0.272974   -9999.000000       0.241500   -9999.000000       0.137000
57824     57824     guizhou        107.2342       26.5861          134       149     2012      02        05        036              0.308000       6.392365       1.168409       0.274786       0.094500   -9999.000000   -9999.000000       0.280000
57824     57824     guizhou        107.2342       26.5861          134       149     2012      02        06        037              0.308000       6.592834       0.676074       0.276638       0.081000   -9999.000000       0.032100   -9999.000000
57824     57824     guizhou        107.2342       26.5861          134       149     2012      02        07        038              0.307217       5.531891       0.000000       0.274776       0.089000       0.244900       0.032800       0.159000
57824     57824     guizhou        107.2342       26.5861          134       149     2012      02        08        039              0.307000       5.197021       0.000000       0.271077   -9999.000000   -9999.000000       0.030500   -9999.000000
57824     57824     guizhou        107.2342       26.5861          134       149     2012      02        09        040              0.304667       2.018707       0.128346       0.247809   -9999.000000       0.051200       0.024800       0.022000
57824     57824     guizhou        107.2342       26.5861          134       149     2012      02        10        041              0.303000       1.441254       0.186372       0.232764   -9999.000000   -9999.000000   -9999.000000   -9999.000000
57824     57824     guizhou        107.2342       26.5861          134       149     2012      02        11        042              0.303000       1.444336       0.434737       0.234692       0.119000       0.044300   -9999.000000       0.013000
57824     57824     guizhou        107.2342       26.5861          134       149     2012      02        12        043              0.301583       2.629578       0.286081       0.260521       0.114000       0.139000   -9999.000000       0.193000
57824     57824     guizhou        107.2342       26.5861          134       149     2012      02        13        044              0.301000       5.951935       0.507606       0.270803   -9999.000000   -9999.000000       0.020900   -9999.000000
57824     57824     guizhou        107.2342       26.5861          134       149     2012      02        14        045              0.301000       6.368652       0.456216       0.271954   -9999.000000       0.201300   -9999.000000       0.387000
57824     57824     guizhou        107.2342       26.5861          134       149     2012      02        15        046              0.301000       4.551239       0.531555       0.272838   -9999.000000   -9999.000000   -9999.000000   -9999.000000
57824     57824     guizhou        107.2342       26.5861          134       149     2012      02        16        047              0.299957       3.717102       0.000000       0.271476       0.122500   -9999.000000   -9999.000000       0.173000
57824     57824     guizhou        107.2342       26.5861          134       149     2012      02        17        048              0.297000       3.424866       0.000000       0.268891       0.121500       0.043100   -9999.000000       0.042000
57824     57824     guizhou        107.2342       26.5861          134       149     2012      02        18        049              0.000000       2.277466       0.000000       0.261020   -9999.000000   -9999.000000       0.024300   -9999.000000
57824     57824     guizhou        107.2342       26.5861          134       149     2012      02        19        050              0.297000       1.403503       1.199050       0.238992   -9999.000000       0.106000       0.032800       0.158000
57824     57824     guizhou        107.2342       26.5861          134       149     2012      02        20        051              0.297000       3.132874       1.769876       0.263540   -9999.000000   -9999.000000       0.024800   -9999.000000
57824     57824     guizhou        107.2342       26.5861          134       149     2012      02        21        052              0.297000       4.950775       3.814255       0.276025       0.080000   -9999.000000   -9999.000000       0.563000
57824     57824     guizhou        107.2342       26.5861          134       149     2012      02        22        053              0.297000       5.795746       1.031084       0.284977       0.075000       0.224900   -9999.000000       0.445000
57824     57824     guizhou        107.2342       26.5861          134       149     2012      02        23        054              0.000000       6.243500       0.939040       0.282458       0.071500   -9999.000000       0.031100       0.320000
57824     57824     guizhou        107.2342       26.5861          134       149     2012      02        24        055              0.297000       6.824829       1.841623       0.279730   -9999.000000       0.122900       0.029400       0.454000
57824     57824     guizhou        107.2342       26.5861          134       149     2012      02        25        056              0.299957       6.249023       0.273340       0.281122   -9999.000000       0.119200       0.030100   -9999.000000
57824     57824     guizhou        107.2342       26.5861          134       149     2012      02        26        057              0.301000       3.411194       0.371223       0.274846   -9999.000000   -9999.000000       0.025000       0.141000
57824     57824     guizhou        107.2342       26.5861          134       149     2012      02        27        058              0.301000       1.922546       0.446400       0.257512   -9999.000000       0.206000   -9999.000000   -9999.000000
57824     57824     guizhou        107.2342       26.5861          134       149     2012      02        28        059              0.301000       2.219452       0.121269       0.257983       0.076000   -9999.000000   -9999.000000       0.116000
57824     57824     guizhou        107.2342       26.5861          134       149     2012      02        29        060              0.000000   -9999.000000       0.483202   -9999.000000   -9999.000000       0.125900   -9999.000000   -9999.000000
57824     57824     guizhou        107.2342       26.5861          134       149     2012      03        01        061              0.301000       2.404388       1.692574       0.260556   -9999.000000       0.226900       0.040900   -9999.000000
57824     57824     guizhou        107.2342       26.5861          134       149     2012      03        02        062              0.301000       7.370148       2.766477       0.273255   -9999.000000   -9999.000000       0.033100       0.412000
57824     57824     guizhou        107.2342       26.5861          134       149     2012      03        03        063              0.302348       6.573029       6.391335       0.281330       0.106500       0.414800   -9999.000000   -9999.000000
57824     57824     guizhou        107.2342       26.5861          134       149     2012      03        04        064              0.314833       7.229279       0.346335       0.291148       0.105500       0.214300   -9999.000000       0.433000
57824     57824     guizhou        107.2342       26.5861          134       149     2012      03        05        065              0.317000       6.058044       0.668369       0.286008       0.097000   -9999.000000   -9999.000000       0.463000
57824     57824     guizhou        107.2342       26.5861          134       149     2012      03        06        066              0.317000      10.393951       0.817501       0.278787   -9999.000000       0.043300       0.045700   -9999.000000
57824     57824     guizhou        107.2342       26.5861          134       149     2012      03        07        067              0.000000       5.888855       0.601623       0.279403       0.114000   -9999.000000       0.054300       0.246000
57824     57824     guizhou        107.2342       26.5861          134       149     2012      03        08        068              0.317000       4.334747       0.765718       0.276846       0.112000       0.210800       0.046800   -9999.000000
57824     57824     guizhou        107.2342       26.5861          134       149     2012      03        09        069              0.317000       3.671356       0.143001       0.277063       0.103000       0.178100   -9999.000000       0.284000
57824     57824     guizhou        107.2342       26.5861          134       149     2012      03        10        070              0.317000       3.605896       0.000000       0.275199       0.098500   -9999.000000   -9999.000000   -9999.000000
57824     57824     guizhou        107.2342       26.5861          134       149     2012      03        11        071              0.316304       6.247681       0.042195       0.273363   -9999.000000       0.156100       0.051400       0.378000
57824     57824     guizhou        107.2342       26.5861          134       149     2012      03        12        072              0.315000       6.476868       0.079740       0.272305   -9999.000000   -9999.000000       0.046000       0.227000
57824     57824     guizhou        107.2342       26.5861          134       149     2012      03        13        073              0.313125       5.619965       0.000000       0.272247       0.126500       0.074000       0.049500   -9999.000000
57824     57824     guizhou        107.2342       26.5861          134       149     2012      03        14        074              0.309913      12.000519       0.566691       0.268415       0.127000       0.137600   -9999.000000       0.341000
57824     57824     guizhou        107.2342       26.5861          134       149     2012      03        15        075              0.307000      10.767761       0.867243       0.269211       0.118000   -9999.000000   -9999.000000   -9999.000000
57824     57824     guizhou        107.2342       26.5861          134       149     2012      03        16        076              0.302217      14.918762       0.000000       0.265799   -9999.000000       0.193300   -9999.000000       0.364000
57824     57824     guizhou        107.2342       26.5861          134       149     2012      03        17        077              0.296917      12.805389       0.000000       0.266649   -9999.000000   -9999.000000       0.043400       0.384000
57824     57824     guizhou        107.2342       26.5861          134       149     2012      03        18        078              0.289583      18.138184       0.000000       0.262239       0.112500       0.246600       0.045100   -9999.000000
57824     57824     guizhou        107.2342       26.5861          134       149     2012      03        19        079              0.277125      19.535400       0.000000       0.260855       0.110000       0.073300       0.056400       0.265000
57824     57824     guizhou        107.2342       26.5861          134       149     2012      03        20        080              0.265792      21.816895       0.000000       0.253518       0.114500   -9999.000000   -9999.000000   -9999.000000
57824     57824     guizhou        107.2342       26.5861          134       149     2012      03        21        081              0.258421      18.624481       1.497200       0.252326       0.106000       0.130800   -9999.000000       0.384000
57824     57824     guizhou        107.2342       26.5861          134       149     2012      03        22        082              0.252833      20.500488       9.564915       0.251754   -9999.000000   -9999.000000   -9999.000000       0.386000
57824     57824     guizhou        107.2342       26.5861          134       149     2012      03        23        083              0.252348      14.661011       0.295137       0.276973       0.118000   -9999.000000       0.059800       0.302000
57824     57824     guizhou        107.2342       26.5861          134       149     2012      03        24        084              0.254333       9.142761       0.000000       0.277982       0.107000       0.043900       0.055100       0.427000
57824     57824     guizhou        107.2342       26.5861          134       149     2012      03        25        085              0.000000      14.493866       0.389972       0.266251       0.101500   -9999.000000       0.056500   -9999.000000
57824     57824     guizhou        107.2342       26.5861          134       149     2012      03        26        086              0.251292      15.520935       0.966354       0.262760       0.098000       0.049700   -9999.000000       0.364000
57824     57824     guizhou        107.2342       26.5861          134       149     2012      03        27        087              0.251000      16.214325      10.708042       0.262375   -9999.000000       0.053900   -9999.000000   -9999.000000
57824     57824     guizhou        107.2342       26.5861          134       149     2012      03        28        088              0.257750      15.927979       5.254631       0.283505   -9999.000000   -9999.000000       0.066900       0.662000
57824     57824     guizhou        107.2342       26.5861          134       149     2012      03        29        089              0.308833      14.614075       8.306536       0.297170       0.136000       0.086400       0.064400       0.734000
57824     57824     guizhou        107.2342       26.5861          134       149     2012      03        30        090              0.340083      14.296692       5.629647       0.301011       0.119000   -9999.000000       0.064800   -9999.000000
57824     57824     guizhou        107.2342       26.5861          134       149     2012      03        31        091              0.334130      12.933380       0.239574       0.298062       0.109500       0.328700   -9999.000000       0.410000
57824     57824     guizhou        107.2342       26.5861          134       149     2012      04        01        092              0.322125      14.206390       0.000000       0.285267   -9999.000000       0.257000   -9999.000000   -9999.000000
57824     57824     guizhou        107.2342       26.5861          134       149     2012      04        02        093              0.309542      18.027618       0.000000       0.273700   -9999.000000   -9999.000000   -9999.000000       0.319000
57824     57824     guizhou        107.2342       26.5861          134       149     2012      04        03        094              0.299500      21.540985       0.000000       0.265929       0.115000       0.295000       0.055300       0.284000
57824     57824     guizhou        107.2342       26.5861          134       149     2012      04        04        095              0.286875      18.229828       0.567280       0.267210       0.103500   -9999.000000       0.059500   -9999.000000
57824     57824     guizhou        107.2342       26.5861          134       149     2012      04        05        096              0.273542      19.127777       0.366112       0.264489       0.100000   -9999.000000       0.052600       0.379000
57824     57824     guizhou        107.2342       26.5861          134       149     2012      04        06        097              0.260708      17.764496       0.953194       0.261476   -9999.000000       0.155500   -9999.000000   -9999.000000
57824     57824     guizhou        107.2342       26.5861          134       149     2012      04        07        098              0.256167      16.331635       0.278198       0.260388   -9999.000000   -9999.000000   -9999.000000       0.211000
57824     57824     guizhou        107.2342       26.5861          134       149     2012      04        08        099              0.252000      13.438873       5.998002       0.264023       0.130000       0.155600   -9999.000000   -9999.000000
57824     57824     guizhou        107.2342       26.5861          134       149     2012      04        09        100              0.251125      16.089447       0.343668       0.274103       0.112500   -9999.000000       0.047800       0.388000
57824     57824     guizhou        107.2342       26.5861          134       149     2012      04        10        101              0.251208      17.466370       0.000000       0.276395       0.104500   -9999.000000       0.050800       0.512000
57824     57824     guizhou        107.2342       26.5861          134       149     2012      04        11        102              0.248217      21.511169       1.800652       0.266277       0.100000       0.313500       0.043100   -9999.000000
57824     57824     guizhou        107.2342       26.5861          134       149     2012      04        12        103              0.243583      21.694214       1.609379       0.268396   -9999.000000   -9999.000000   -9999.000000       0.330000
57824     57824     guizhou        107.2342       26.5861          134       149     2012      04        13        104              0.239000      19.683990       0.281364       0.267855       0.142000       0.150700   -9999.000000   -9999.000000
57824     57824     guizhou        107.2342       26.5861          134       149     2012      04        14        105              0.238000      15.184814       1.044419       0.264129       0.122500       0.018900       0.049200       0.353000
57824     57824     guizhou        107.2342       26.5861          134       149     2012      04        15        106              0.237375      15.390686       0.000000       0.264448       0.115000   -9999.000000       0.049400       0.381000
57824     57824     guizhou        107.2342       26.5861          134       149     2012      04        16        107              0.233542      16.334320       0.000000       0.263054       0.101000       0.094300       0.069100   -9999.000000
57824     57824     guizhou        107.2342       26.5861          134       149     2012      04        17        108              0.230609      18.351807       0.312677       0.259708   -9999.000000   -9999.000000   -9999.000000       0.165000
57824     57824     guizhou        107.2342       26.5861          134       149     2012      04        18        109              0.226708      17.937225       0.000000       0.258026   -9999.000000       0.015700   -9999.000000   -9999.000000
57824     57824     guizhou        107.2342       26.5861          134       149     2012      04        19        110              0.222208      19.291504       5.932249       0.255999       0.111000       0.174600   -9999.000000       0.465000
57824     57824     guizhou        107.2342       26.5861          134       149     2012      04        20        111              0.222000      20.595764       0.156575       0.264075       0.112000   -9999.000000       0.069500       0.482000
57824     57824     guizhou        107.2342       26.5861          134       149     2012      04        21        112              0.219958      17.404938       0.000000       0.270094       0.104500       0.162700       0.073900       0.316000
57824     57824     guizhou        107.2342       26.5861          134       149     2012      04        22        113              0.216500      20.745361       1.540405       0.257061   -9999.000000   -9999.000000   -9999.000000       0.407000
57824     57824     guizhou        107.2342       26.5861          134       149     2012      04        23        114              0.213000      22.733124       0.000000       0.254350   -9999.000000   -9999.000000   -9999.000000   -9999.000000
57824     57824     guizhou        107.2342       26.5861          134       149     2012      04        24        115              0.209250      23.885742       0.730591       0.253243       0.106500       0.073500   -9999.000000       0.428000
57824     57824     guizhou        107.2342       26.5861          134       149     2012      04        25        116              0.000000      23.919647       0.000000       0.249095       0.136000   -9999.000000   -9999.000000   -9999.000000
57824     57824     guizhou        107.2342       26.5861          134       149     2012      04        26        117              0.207375      16.088409       0.856885       0.253157       0.104000       0.131100       0.099400       0.363000
57824     57824     guizhou        107.2342       26.5861          134       149     2012      04        27        118              0.207000      20.804871       0.531543       0.248825   -9999.000000   -9999.000000       0.089200       0.463000
57824     57824     guizhou        107.2342       26.5861          134       149     2012      04        28        119              0.263500      22.557343       9.233448       0.248385   -9999.000000   -9999.000000       0.089000   -9999.000000
57824     57824     guizhou        107.2342       26.5861          134       149     2012      04        29        120              0.310083      22.386444       1.259766       0.272535       0.144000       0.086000   -9999.000000       0.611000
57824     57824     guizhou        107.2342       26.5861          134       149     2012      04        30        121              0.288042      23.585724       0.000000       0.270947       0.120500   -9999.000000   -9999.000000   -9999.000000
57824     57824     guizhou        107.2342       26.5861          134       149     2012      05        01        122              0.272958      25.401520       0.765551       0.257316       0.172500       0.233500       0.086900       0.452000
57824     57824     guizhou        107.2342       26.5861          134       149     2012      05        02        123              0.263750      22.237366       2.368508       0.255655       0.157000       0.153600       0.096400       0.489000
57824     57824     guizhou        107.2342       26.5861          134       149     2012      05        03        124              0.254250      20.286041       3.525063       0.260534   -9999.000000   -9999.000000       0.083500   -9999.000000
57824     57824     guizhou        107.2342       26.5861          134       149     2012      05        04        125              0.251696      20.118622       0.296390       0.268826       0.195000       0.130700   -9999.000000       0.515000
57824     57824     guizhou        107.2342       26.5861          134       149     2012      05        05        126              0.247217      19.188477       0.280466       0.270144       0.175500   -9999.000000   -9999.000000   -9999.000000
57824     57824     guizhou        107.2342       26.5861          134       149     2012      05        06        127              0.239500      22.938599       0.000000       0.261348       0.158500   -9999.000000   -9999.000000       0.425000
57824     57824     guizhou        107.2342       26.5861          134       149     2012      05        07        128              0.231792      24.745789       0.906738       0.255183   -9999.000000       0.294000       0.073600   -9999.000000
57824     57824     guizhou        107.2342       26.5861          134       149     2012      05        08        129              0.235696      25.320557      25.987608       0.249173   -9999.000000   -9999.000000       0.084100       0.503000
57824     57824     guizhou        107.2342       26.5861          134       149     2012      05        09        130              0.341000      25.516968       8.178942       0.280116   -9999.000000       0.215100       0.079700       0.958000
57824     57824     guizhou        107.2342       26.5861          134       149     2012      05        10        131              0.327417      24.770660       2.989261       0.307423       0.193500   -9999.000000   -9999.000000   -9999.000000
57824     57824     guizhou        107.2342       26.5861          134       149     2012      05        11        132              0.315750      23.980774       9.563560       0.286968       0.169000       0.126400   -9999.000000       0.515000
57824     57824     guizhou        107.2342       26.5861          134       149     2012      05        12        133              0.343875      25.625763      15.989701       0.286483       0.195000       0.105700       0.094200   -9999.000000
57824     57824     guizhou        107.2342       26.5861          134       149     2012      05        13        134              0.340833      22.000580      25.165281       0.317533   -9999.000000   -9999.000000       0.100200       0.602000
57824     57824     guizhou        107.2342       26.5861          134       149     2012      05        14        135              0.346375      20.527618       3.980145       0.314264   -9999.000000       0.162500       0.074800       0.732000
57824     57824     guizhou        107.2342       26.5861          134       149     2012      05        15        136              0.346500      17.949493       0.637379       0.309257       0.191500   -9999.000000       0.066300   -9999.000000
57824     57824     guizhou        107.2342       26.5861          134       149     2012      05        16        137              0.337625      18.323273       0.624312       0.296193       0.194000   -9999.000000   -9999.000000       0.462000
57824     57824     guizhou        107.2342       26.5861          134       149     2012      05        17        138              0.317375      20.037323       0.000000       0.283779       0.193000       0.154000   -9999.000000   -9999.000000
57824     57824     guizhou        107.2342       26.5861          134       149     2012      05        18        139              0.319583      22.030365      26.222563       0.276857       0.172000   -9999.000000       0.068400       0.476000
57824     57824     guizhou        107.2342       26.5861          134       149     2012      05        19        140              0.333333      23.106354       0.000000       0.301390   -9999.000000       0.161000       0.066800       0.726000
57824     57824     guizhou        107.2342       26.5861          134       149     2012      05        20        141              0.323917      23.731110       1.475317       0.301549   -9999.000000       0.291600       0.062400       0.500000
57824     57824     guizhou        107.2342       26.5861          134       149     2012      05        21        142              0.336208      24.813293      24.676058       0.286480       0.191000   -9999.000000   -9999.000000       0.801000
57824     57824     guizhou        107.2342       26.5861          134       149     2012      05        22        143              0.347000      21.944550      26.558609       0.315928       0.199000       0.183100   -9999.000000   -9999.000000
57824     57824     guizhou        107.2342       26.5861          134       149     2012      05        23        144              0.341870      19.486267       6.119094       0.324588   -9999.000000   -9999.000000   -9999.000000       0.811000
57824     57824     guizhou        107.2342       26.5861          134       149     2012      05        24        145              0.354792      19.257019      17.597523       0.305464   -9999.000000       0.153100       0.060700   -9999.000000
57824     57824     guizhou        107.2342       26.5861          134       149     2012      05        25        146              0.000000      18.596649      11.147824       0.323142   -9999.000000       0.379500       0.061600       0.770000
57824     57824     guizhou        107.2342       26.5861          134       149     2012      05        26        147              0.346208      18.155884       0.000000       0.317719       0.179000   -9999.000000       0.054400       0.706000
57824     57824     guizhou        107.2342       26.5861          134       149     2012      05        27        148              0.340042      20.044952      18.952396       0.304582       0.159000       0.098900   -9999.000000   -9999.000000
57824     57824     guizhou        107.2342       26.5861          134       149     2012      05        28        149              0.343261      22.194641       0.300948       0.312084       0.177500   -9999.000000   -9999.000000       0.621000
57824     57824     guizhou        107.2342       26.5861          134       149     2012      05        29        150              0.349833      23.037689      14.623740       0.310604   -9999.000000   -9999.000000       0.067000   -9999.000000
57824     57824     guizhou        107.2342       26.5861          134       149     2012      05        30        151              0.343625      20.543427       0.641057       0.321911   -9999.000000       0.356000       0.055700   -9999.000000
57824     57824     guizhou        107.2342       26.5861          134       149     2012      05        31        152              0.337625      20.435760       3.379872       0.306188       0.180500   -9999.000000       0.056200   -9999.000000
57824     57824     guizhou        107.2342       26.5861          134       149     2012      06        01        153              0.343333      19.876465       3.998936       0.303277       0.240500       0.498600       0.058300   -9999.000000
57824     57824     guizhou        107.2342       26.5861          134       149     2012      06        02        154              0.341833      18.318634       1.688901       0.308953       0.231000   -9999.000000   -9999.000000       0.515000
57824     57824     guizhou        107.2342       26.5861          134       149     2012      06        03        155              0.346542      19.115570      10.235895       0.300341   -9999.000000   -9999.000000   -9999.000000   -9999.000000
57824     57824     guizhou        107.2342       26.5861          134       149     2012      06        04        156              0.352667      19.179626       6.400898       0.310649   -9999.000000       0.315100       0.042800       0.736000
57824     57824     guizhou        107.2342       26.5861          134       149     2012      06        05        157              0.348833      19.170624       4.345135       0.312055       0.219000   -9999.000000       0.046800   -9999.000000
57824     57824     guizhou        107.2342       26.5861          134       149     2012      06        06        158              0.349542      21.075592      18.520193       0.307600       0.243000       0.253400       0.043700       0.709000
57824     57824     guizhou        107.2342       26.5861          134       149     2012      06        07        159              0.360167      21.214752      26.215012       0.311990       0.218500       0.176500   -9999.000000       0.986000
57824     57824     guizhou        107.2342       26.5861          134       149     2012      06        08        160              0.345542      20.793060       0.381692       0.333500       0.221000   -9999.000000   -9999.000000   -9999.000000
57824     57824     guizhou        107.2342       26.5861          134       149     2012      06        09        161              0.347250      22.767212      24.013798       0.313198   -9999.000000       0.058000   -9999.000000       0.711000
57824     57824     guizhou        107.2342       26.5861          134       149     2012      06        10        162              0.353500      23.974701       1.856116       0.325198       0.219000   -9999.000000       0.042500   -9999.000000
57824     57824     guizhou        107.2342       26.5861          134       149     2012      06        11        163              0.000000      22.427460       0.624580       0.319433       0.173000       0.218600       0.045600       0.651000
57824     57824     guizhou        107.2342       26.5861          134       149     2012      06        12        164              0.340500      21.989563       0.847015       0.309625       0.173000       0.252300       0.045800       0.672000
57824     57824     guizhou        107.2342       26.5861          134       149     2012      06        13        165              0.336522      20.871185       0.399992       0.306421       0.147000   -9999.000000   -9999.000000   -9999.000000
57824     57824     guizhou        107.2342       26.5861          134       149     2012      06        14        166              0.346125      22.528015       5.584095       0.302237   -9999.000000       0.205000   -9999.000000       0.523000
57824     57824     guizhou        107.2342       26.5861          134       149     2012      06        15        167              0.341000      21.801819       0.365658       0.307109   -9999.000000   -9999.000000       0.043100   -9999.000000
57824     57824     guizhou        107.2342       26.5861          134       149     2012      06        16        168              0.331750      22.229034       0.000000       0.295500       0.147000       0.161600       0.041000       0.533000
57824     57824     guizhou        107.2342       26.5861          134       149     2012      06        17        169              0.322458      22.474121       0.179249       0.288327       0.138500       0.148100       0.042700       0.502000
57824     57824     guizhou        107.2342       26.5861          134       149     2012      06        18        170              0.312583      23.930023       1.076809       0.284970       0.148500   -9999.000000   -9999.000000       0.595000
57824     57824     guizhou        107.2342       26.5861          134       149     2012      06        19        171              0.307190      22.093750       4.106651       0.286764   -9999.000000       0.301400   -9999.000000       0.659000
57824     57824     guizhou        107.2342       26.5861          134       149     2012      06        20        172              0.300833      19.302948       0.000000       0.296538   -9999.000000   -9999.000000   -9999.000000   -9999.000000
57824     57824     guizhou        107.2342       26.5861          134       149     2012      06        21        173              0.303792      23.159790      10.637752       0.285097       0.184000   -9999.000000       0.064000       0.734000
57824     57824     guizhou        107.2342       26.5861          134       149     2012      06        22        174              0.346917      22.859711      22.580177       0.299933       0.230000       0.376000       0.077000   -9999.000000
57824     57824     guizhou        107.2342       26.5861          134       149     2012      06        23        175              0.353292      20.745483       4.757747       0.321649       0.187000   -9999.000000       0.063800       0.710000
57824     57824     guizhou        107.2342       26.5861          134       149     2012      06        24        176              0.344125      21.441162      14.457220       0.311163   -9999.000000       0.256300   -9999.000000       0.617000
57824     57824     guizhou        107.2342       26.5861          134       149     2012      06        25        177              0.361333      23.836029      39.215832       0.309149   -9999.000000       0.320200   -9999.000000   -9999.000000
57824     57824     guizhou        107.2342       26.5861          134       149     2012      06        26        178              0.357250      24.167969       2.356789       0.332779       0.173000   -9999.000000   -9999.000000       0.776000
57824     57824     guizhou        107.2342       26.5861          134       149     2012      06        27        179              0.354542      23.308929      15.364415       0.324782       0.190500       0.178400       0.106600   -9999.000000
57824     57824     guizhou        107.2342       26.5861          134       149     2012      06        28        180              0.352250      24.667694       1.181469       0.325078       0.186000   -9999.000000       0.112000       0.659000
57824     57824     guizhou        107.2342       26.5861          134       149     2012      06        29        181              0.343208      24.239532       0.000000       0.315321       0.161000       0.193500       0.099800       0.701000
57824     57824     guizhou        107.2342       26.5861          134       149     2012      06        30        182              0.329625      25.932343       4.099940       0.305479   -9999.000000       0.346800   -9999.000000   -9999.000000
57824     57824     guizhou        107.2342       26.5861          134       149     2012      07        01        183              0.309750      26.933167       1.172374       0.304071       0.213000   -9999.000000   -9999.000000       0.507000
57824     57824     guizhou        107.2342       26.5861          134       149     2012      07        02        184              0.284167      25.357361       0.000000       0.298065       0.226000       0.220200       0.079900   -9999.000000
57824     57824     guizhou        107.2342       26.5861          134       149     2012      07        03        185              0.261875      24.361908       1.128441       0.292511       0.205000   -9999.000000       0.085300       0.470000
57824     57824     guizhou        107.2342       26.5861          134       149     2012      07        04        186              0.245292      24.958221       2.855250       0.287229       0.193000       0.079600       0.081800   -9999.000000
57824     57824     guizhou        107.2342       26.5861          134       149     2012      07        05        187              0.234375      25.559723       0.000000       0.283620   -9999.000000       0.243600   -9999.000000       0.518000
57824     57824     guizhou        107.2342       26.5861          134       149     2012      07        06        188              0.223792      26.114929       0.000000       0.281004   -9999.000000   -9999.000000   -9999.000000       0.511000
57824     57824     guizhou        107.2342       26.5861          134       149     2012      07        07        189              0.216875      26.490448       0.000000       0.277754   -9999.000000       0.151000   -9999.000000   -9999.000000
57824     57824     guizhou        107.2342       26.5861          134       149     2012      07        08        190              0.212000      26.267792       0.000000       0.276522       0.191000   -9999.000000       0.078700       0.478000
57824     57824     guizhou        107.2342       26.5861          134       149     2012      07        09        191              0.207833      25.909851       0.000000       0.274731       0.183500       0.061200       0.128000   -9999.000000
57824     57824     guizhou        107.2342       26.5861          134       149     2012      07        10        192              0.202667      26.242432       0.000000       0.272833   -9999.000000       0.376100       0.118800       0.512000
57824     57824     guizhou        107.2342       26.5861          134       149     2012      07        11        193              0.198625      27.325867       0.327394       0.270477   -9999.000000   -9999.000000   -9999.000000       0.474000
57824     57824     guizhou        107.2342       26.5861          134       149     2012      07        12        194              0.225125      27.858673      37.239704       0.267415   -9999.000000       0.247700   -9999.000000   -9999.000000
57824     57824     guizhou        107.2342       26.5861          134       149     2012      07        13        195              0.348125      26.290192      13.553594       0.305104       0.266000       0.324800   -9999.000000       0.548000
57824     57824     guizhou        107.2342       26.5861          134       149     2012      07        14        196              0.326042      24.171234       2.560817       0.318527       0.245500   -9999.000000       0.131300   -9999.000000
57824     57824     guizhou        107.2342       26.5861          134       149     2012      07        15        197              0.311083      26.695648       8.625360       0.295561       0.229000       0.119600       0.121800       0.619000
57824     57824     guizhou        107.2342       26.5861          134       149     2012      07        16        198              0.304667      26.116333       9.620728       0.294423   -9999.000000   -9999.000000       0.088500       0.622000
57824     57824     guizhou        107.2342       26.5861          134       149     2012      07        17        199              0.358500      25.080292      28.563486       0.308532   -9999.000000       0.212000   -9999.000000       0.924000
57824     57824     guizhou        107.2342       26.5861          134       149     2012      07        18        200              0.359208      24.223999      21.737822       0.330734       0.288000   -9999.000000   -9999.000000       0.855000
57824     57824     guizhou        107.2342       26.5861          134       149     2012      07        19        201              0.365500      25.007690       9.478892       0.318948       0.257500   -9999.000000       0.088800   -9999.000000
57824     57824     guizhou        107.2342       26.5861          134       149     2012      07        20        202              0.342458      24.773193       0.000000       0.320589       0.237000       0.066900       0.090300       0.588000
57824     57824     guizhou        107.2342       26.5861          134       149     2012      07        21        203              0.322625      26.330536       0.000000       0.304525   -9999.000000   -9999.000000       0.081200   -9999.000000
57824     57824     guizhou        107.2342       26.5861          134       149     2012      07        22        204              0.295667      27.120361      13.158267       0.298615   -9999.000000       0.091900   -9999.000000       0.555000
57824     57824     guizhou        107.2342       26.5861          134       149     2012      07        23        205              0.301261      26.425568       9.785625       0.308499   -9999.000000       0.236000   -9999.000000       0.684000
57824     57824     guizhou        107.2342       26.5861          134       149     2012      07        24        206              0.355833      23.685211      26.522600       0.315708       0.356000   -9999.000000   -9999.000000   -9999.000000
57824     57824     guizhou        107.2342       26.5861          134       149     2012      07        25        207              0.373042      23.274475      33.466831       0.330924       0.324000       0.292200       0.070100       0.963000
57824     57824     guizhou        107.2342       26.5861          134       149     2012      07        26        208              0.358417      24.190338       9.082135       0.341789       0.281000   -9999.000000       0.073200   -9999.000000
57824     57824     guizhou        107.2342       26.5861          134       149     2012      07        27        209              0.352500      24.589417       7.424715       0.333955   -9999.000000   -9999.000000       0.059400       0.650000
57824     57824     guizhou        107.2342       26.5861          134       149     2012      07        28        210              0.347167      25.242493       1.833909       0.322708       0.303000       0.281600   -9999.000000       0.657000
57824     57824     guizhou        107.2342       26.5861          134       149     2012      07        29        211              0.341333      25.261841       0.765323       0.311978       0.298500   -9999.000000   -9999.000000   -9999.000000
57824     57824     guizhou        107.2342       26.5861          134       149     2012      07        30        212              0.328167      25.430267       2.869344       0.305035       0.286500       0.299400       0.101300       0.496000
57824     57824     guizhou        107.2342       26.5861          134       149     2012      07        31        213              0.304917      25.707886       1.706356       0.301109       0.252000       0.264200       0.096200   -9999.000000
57824     57824     guizhou        107.2342       26.5861          134       149     2012      08        01        214              0.277625      26.632172       0.983709       0.296096   -9999.000000   -9999.000000       0.101000       0.657000
57824     57824     guizhou        107.2342       26.5861          134       149     2012      08        02        215              0.267833      26.377045       2.661631       0.291034   -9999.000000       0.182700       0.088200   -9999.000000
57824     57824     guizhou        107.2342       26.5861          134       149     2012      08        03        216              0.262750      25.194885       0.000000       0.292330       0.334500   -9999.000000   -9999.000000       0.516000
57824     57824     guizhou        107.2342       26.5861          134       149     2012      08        04        217              0.250042      25.737701       0.428852       0.283590       0.306500       0.106500   -9999.000000       0.572000
57824     57824     guizhou        107.2342       26.5861          134       149     2012      08        05        218              0.239208      25.833954       3.282610       0.279644       0.379500       0.112700       0.102900   -9999.000000
57824     57824     guizhou        107.2342       26.5861          134       149     2012      08        06        219              0.238000      25.553802       4.870662       0.286294   -9999.000000   -9999.000000       0.144800       0.677000
57824     57824     guizhou        107.2342       26.5861          134       149     2012      08        07        220              0.246708      23.453796       6.754428       0.297117   -9999.000000       0.349300       0.126000   -9999.000000
57824     57824     guizhou        107.2342       26.5861          134       149     2012      08        08        221              0.251375      23.917419       4.237228       0.300685       0.352000   -9999.000000   -9999.000000       0.597000
57824     57824     guizhou        107.2342       26.5861          134       149     2012      08        09        222              0.245792      25.654327       0.000000       0.294636       0.335500       0.130400   -9999.000000       0.604000
57824     57824     guizhou        107.2342       26.5861          134       149     2012      08        10        223              0.235500      26.105408       0.000000       0.283093       0.330500   -9999.000000   -9999.000000   -9999.000000
57824     57824     guizhou        107.2342       26.5861          134       149     2012      08        11        224              0.224917      26.296570       0.000000       0.276256       0.207000   -9999.000000       0.127300       0.385000
57824     57824     guizhou        107.2342       26.5861          134       149     2012      08        12        225              0.217083      26.952850       1.722308       0.271933   -9999.000000       0.110900       0.133600   -9999.000000
57824     57824     guizhou        107.2342       26.5861          134       149     2012      08        13        226              0.212750      27.517029       5.695205       0.269889   -9999.000000   -9999.000000       0.124700       0.558000
57824     57824     guizhou        107.2342       26.5861          134       149     2012      08        14        227              0.214125      26.521240       3.673333       0.280771       0.247500   -9999.000000   -9999.000000       0.777000
57824     57824     guizhou        107.2342       26.5861          134       149     2012      08        15        228              0.212167      26.405823       1.755707       0.289703       0.232500       0.258100   -9999.000000       0.455000
57824     57824     guizhou        107.2342       26.5861          134       149     2012      08        16        229              0.208750      26.860352       2.041286       0.276191       0.207000   -9999.000000       0.135700       0.583000
57824     57824     guizhou        107.2342       26.5861          134       149     2012      08        17        230              0.204304      27.812103       0.313210       0.268842   -9999.000000       0.137600       0.133000   -9999.000000
57824     57824     guizhou        107.2342       26.5861          134       149     2012      08        18        231              0.202000      26.894592       5.368023       0.265531   -9999.000000       0.325500       0.143000       0.702000
57824     57824     guizhou        107.2342       26.5861          134       149     2012      08        19        232              0.202000      25.513062       1.744870       0.280929       0.231000   -9999.000000   -9999.000000   -9999.000000
57824     57824     guizhou        107.2342       26.5861          134       149     2012      08        20        233              0.204208      25.978729      11.168056       0.270924       0.234000       0.175400   -9999.000000       0.369000
57824     57824     guizhou        107.2342       26.5861          134       149     2012      08        21        234              0.217000      27.106720       1.118606       0.279375       0.324000   -9999.000000   -9999.000000       0.594000
57824     57824     guizhou        107.2342       26.5861          134       149     2012      08        22        235              0.217000      24.840302       0.822534       0.283987       0.353000       0.200400       0.087200   -9999.000000
57824     57824     guizhou        107.2342       26.5861          134       149     2012      08        23        236              0.214417      21.150024       0.000000       0.279560   -9999.000000   -9999.000000       0.093700       0.449000
57824     57824     guizhou        107.2342       26.5861          134       149     2012      08        24        237              0.209542      22.315277       0.000000       0.268878   -9999.000000   -9999.000000       0.083700   -9999.000000
57824     57824     guizhou        107.2342       26.5861          134       149     2012      08        25        238              0.000000      23.185455       0.000000       0.263959       0.312000       0.103200   -9999.000000       0.436000
57824     57824     guizhou        107.2342       26.5861          134       149     2012      08        26        239              0.202917      23.247833       0.000000       0.261764       0.313500   -9999.000000   -9999.000000       0.494000
57824     57824     guizhou        107.2342       26.5861          134       149     2012      08        27        240              0.200750      24.019623       3.163764       0.258048       0.316000       0.170000   -9999.000000   -9999.000000
57824     57824     guizhou        107.2342       26.5861          134       149     2012      08        28        241              0.197565      23.737854       2.443920       0.256875   -9999.000000       0.334700       0.098400       0.426000
57824     57824     guizhou        107.2342       26.5861          134       149     2012      08        29        242              0.197000      26.235565       0.487112       0.251835   -9999.000000   -9999.000000       0.105500   -9999.000000
57824     57824     guizhou        107.2342       26.5861          134       149     2012      08        30        243              0.195000      25.810699       0.000000       0.253912       0.318000       0.146700       0.091500       0.447000
57824     57824     guizhou        107.2342       26.5861          134       149     2012      08        31        244              0.191583      26.743042       0.000000       0.249390       0.301500   -9999.000000   -9999.000000   -9999.000000
57824     57824     guizhou        107.2342       26.5861          134       149     2012      09        01        245              0.190417      26.450500       4.778808       0.245124       0.244500       0.146300   -9999.000000       0.437000
57824     57824     guizhou        107.2342       26.5861          134       149     2012      09        02        246              0.190333      25.896149       9.449847       0.248884   -9999.000000       0.107300       0.097900       0.729000
57824     57824     guizhou        107.2342       26.5861          134       149     2012      09        03        247              0.191000      22.341827       0.116724       0.289824   -9999.000000   -9999.000000       0.137400   -9999.000000
57824     57824     guizhou        107.2342       26.5861          134       149     2012      09        04        248              0.191792      21.471985       0.000000       0.269547       0.245000       0.087300       0.124400       0.346000
57824     57824     guizhou        107.2342       26.5861          134       149     2012      09        05        249              0.192000      22.167877       0.000000       0.259973       0.246500       0.064400   -9999.000000   -9999.000000
57824     57824     guizhou        107.2342       26.5861          134       149     2012      09        06        250              0.192750      23.061066       0.000000       0.257629       0.247000   -9999.000000   -9999.000000       0.402000
57824     57824     guizhou        107.2342       26.5861          134       149     2012      09        07        251              0.192875      24.337311       0.000000       0.254131       0.225000       0.067400   -9999.000000       0.506000
57824     57824     guizhou        107.2342       26.5861          134       149     2012      09        08        252              0.192875      25.353485       0.000000       0.249968   -9999.000000   -9999.000000       0.130600   -9999.000000
57824     57824     guizhou        107.2342       26.5861          134       149     2012      09        09        253              0.192500      25.658966       0.451028       0.246372   -9999.000000       0.345800       0.138600       0.304000
57824     57824     guizhou        107.2342       26.5861          134       149     2012      09        10        254              0.191667      26.033936       0.381135       0.244590       0.248500       0.132600       0.160400   -9999.000000
57824     57824     guizhou        107.2342       26.5861          134       149     2012      09        11        255              0.191083      25.761536      31.119057       0.243147       0.136000   -9999.000000   -9999.000000       0.404000
57824     57824     guizhou        107.2342       26.5861          134       149     2012      09        12        256              0.191000      25.049347      26.628798       0.265251       0.152000       0.232300   -9999.000000       0.763000
57824     57824     guizhou        107.2342       26.5861          134       149     2012      09        13        257              0.191000      20.644135       5.223483       0.325397   -9999.000000   -9999.000000   -9999.000000       0.357000
57824     57824     guizhou        107.2342       26.5861          134       149     2012      09        14        258              0.192958      17.693909       0.000000       0.304128   -9999.000000       0.144000       0.170700       0.502000
57824     57824     guizhou        107.2342       26.5861          134       149     2012      09        15        259              0.196167      19.413147       0.000000       0.283855       0.125500       0.265900       0.177300   -9999.000000
57824     57824     guizhou        107.2342       26.5861          134       149     2012      09        16        260              0.197000      20.164246       3.388757       0.273747       0.163000   -9999.000000       0.165700       0.432000
57824     57824     guizhou        107.2342       26.5861          134       149     2012      09        17        261              0.197833      17.047516       0.282560       0.283115       0.157500       0.074800   -9999.000000   -9999.000000
57824     57824     guizhou        107.2342       26.5861          134       149     2012      09        18        262              0.200500      17.282227       6.466628       0.276135   -9999.000000   -9999.000000   -9999.000000       0.656000
57824     57824     guizhou        107.2342       26.5861          134       149     2012      09        19        263              0.201792      17.172485       0.000000       0.290336   -9999.000000       0.142100       0.057000       0.498000
57824     57824     guizhou        107.2342       26.5861          134       149     2012      09        20        264              0.204250      18.413116       7.469236       0.280095       0.176000       0.183500       0.069400   -9999.000000
57824     57824     guizhou        107.2342       26.5861          134       149     2012      09        21        265              0.207625      18.785553       5.035056       0.292219   -9999.000000   -9999.000000       0.058000       0.726000
57824     57824     guizhou        107.2342       26.5861          134       149     2012      09        22        266              0.215292      18.980164      13.141893       0.297231       0.215500       0.098300   -9999.000000   -9999.000000
57824     57824     guizhou        107.2342       26.5861          134       149     2012      09        23        267              0.297208      19.295410      11.933559       0.300518       0.197500   -9999.000000   -9999.000000       0.682000
57824     57824     guizhou        107.2342       26.5861          134       149     2012      09        24        268              0.316875      19.024200       7.435094       0.314970   -9999.000000   -9999.000000   -9999.000000       0.540000
57824     57824     guizhou        107.2342       26.5861          134       149     2012      09        25        269              0.315750      18.698853       0.168183       0.306572   -9999.000000       0.348900       0.075000   -9999.000000
57824     57824     guizhou        107.2342       26.5861          134       149     2012      09        26        270              0.313125      20.223602       0.627558       0.291516       0.214000   -9999.000000       0.082800       0.556000
57824     57824     guizhou        107.2342       26.5861          134       149     2012      09        27        271              0.312000      20.476990       0.428550       0.287454       0.191500       0.177500       0.071000   -9999.000000
57824     57824     guizhou        107.2342       26.5861          134       149     2012      09        28        272              0.307200      19.968933       0.000000       0.286037       0.180000   -9999.000000   -9999.000000       0.421000
57824     57824     guizhou        107.2342       26.5861          134       149     2012      09        29        273              0.301250      19.254608       1.921529       0.281255   -9999.000000   -9999.000000   -9999.000000   -9999.000000
57824     57824     guizhou        107.2342       26.5861          134       149     2012      09        30        274              0.291583      20.097717       0.000000       0.276601   -9999.000000       0.221600       0.075900       0.388000
57824     57824     guizhou        107.2342       26.5861          134       149     2012      10        01        275              0.276167      19.473206       0.000000       0.274374       0.086000   -9999.000000       0.047600       0.463000
57824     57824     guizhou        107.2342       26.5861          134       149     2012      10        02        276              0.257875      20.762512       0.577196       0.272387       0.093000       0.136600       0.054000   -9999.000000
57824     57824     guizhou        107.2342       26.5861          134       149     2012      10        03        277              0.249167      20.627991       9.063669       0.272786       0.107000       0.182300       0.046800       0.632000
57824     57824     guizhou        107.2342       26.5861          134       149     2012      10        04        278              0.254375      18.142029       8.815450       0.294481       0.112000   -9999.000000   -9999.000000   -9999.000000
57824     57824     guizhou        107.2342       26.5861          134       149     2012      10        05        279              0.313833      16.966248       7.283486       0.304909   -9999.000000       0.176300   -9999.000000       0.717000
57824     57824     guizhou        107.2342       26.5861          134       149     2012      10        06        280              0.315750      16.839447       0.177190       0.305538   -9999.000000   -9999.000000       0.053600       0.626000
57824     57824     guizhou        107.2342       26.5861          134       149     2012      10        07        281              0.311833      16.395721       0.000000       0.290590       0.100500       0.120400       0.055700   -9999.000000
57824     57824     guizhou        107.2342       26.5861          134       149     2012      10        08        282              0.307708      17.985779       3.638452       0.284922       0.107500       0.207200       0.042900       0.432000
57824     57824     guizhou        107.2342       26.5861          134       149     2012      10        09        283              0.307625      17.633728       3.558251       0.287980       0.095000   -9999.000000   -9999.000000   -9999.000000
57824     57824     guizhou        107.2342       26.5861          134       149     2012      10        10        284              0.307667      16.644196       0.544439       0.296714   -9999.000000       0.307300   -9999.000000       0.548000
57824     57824     guizhou        107.2342       26.5861          134       149     2012      10        11        285              0.306167      17.164062       0.000000       0.286137   -9999.000000   -9999.000000   -9999.000000       0.545000
57824     57824     guizhou        107.2342       26.5861          134       149     2012      10        12        286              0.302333      17.488983       8.221684       0.283059       0.224000   -9999.000000       0.046700   -9999.000000
57824     57824     guizhou        107.2342       26.5861          134       149     2012      10        13        287              0.315208      16.371918       1.115934       0.292159       0.201000       0.206700       0.049100       0.677000
57824     57824     guizhou        107.2342       26.5861          134       149     2012      10        14        288              0.315000      16.242157       0.423143       0.296364       0.204000   -9999.000000       0.039900   -9999.000000
57824     57824     guizhou        107.2342       26.5861          134       149     2012      10        15        289              0.312875      17.033600       2.185051       0.288537       0.176000       0.305200   -9999.000000       0.614000
57824     57824     guizhou        107.2342       26.5861          134       149     2012      10        16        290              0.311333      21.150787       1.552862       0.286468   -9999.000000       0.323400   -9999.000000   -9999.000000
57824     57824     guizhou        107.2342       26.5861          134       149     2012      10        17        291              0.306042      18.032837       0.000000       0.289778       0.176000   -9999.000000       0.076000       0.319000
57824     57824     guizhou        107.2342       26.5861          134       149     2012      10        18        292              0.297292      16.710449       0.000000       0.280046       0.179000       0.246700       0.069800       0.481000
57824     57824     guizhou        107.2342       26.5861          134       149     2012      10        19        293              0.289000      18.541168       2.293061       0.276812       0.182000   -9999.000000       0.072200   -9999.000000
57824     57824     guizhou        107.2342       26.5861          134       149     2012      10        20        294              0.274833      18.288574       1.270885       0.278202       0.167500       0.286800   -9999.000000       0.456000
57824     57824     guizhou        107.2342       26.5861          134       149     2012      10        21        295              0.259208      20.981934       8.048414       0.275809   -9999.000000       0.415500   -9999.000000   -9999.000000
57824     57824     guizhou        107.2342       26.5861          134       149     2012      10        22        296              0.251542      21.583160       7.056786       0.281053   -9999.000000   -9999.000000   -9999.000000       0.542000
57824     57824     guizhou        107.2342       26.5861          134       149     2012      10        23        297              0.251000      17.659241       5.948963       0.303172   -9999.000000       0.170100       0.057600       0.482000
57824     57824     guizhou        107.2342       26.5861          134       149     2012      10        24        298              0.251042      17.005280       1.804566       0.292945   -9999.000000   -9999.000000       0.057800   -9999.000000
57824     57824     guizhou        107.2342       26.5861          134       149     2012      10        25        299              0.000000      15.364258       0.271899       0.296454       0.172000       0.144100       0.049400       0.495000
57824     57824     guizhou        107.2342       26.5861          134       149     2012      10        26        300              0.252000      18.870148       0.000000       0.285650   -9999.000000       0.245600   -9999.000000   -9999.000000
57824     57824     guizhou        107.2342       26.5861          134       149     2012      10        27        301              0.251292      18.555206       0.000000       0.281617   -9999.000000   -9999.000000   -9999.000000       0.387000
57824     57824     guizhou        107.2342       26.5861          134       149     2012      10        28        302              0.000000      19.236877       2.913799       0.279120       0.191000       0.217700   -9999.000000   -9999.000000
57824     57824     guizhou        107.2342       26.5861          134       149     2012      10        29        303              0.246083      19.239594       8.970483       0.285284       0.179500   -9999.000000       0.103000       0.545000
57824     57824     guizhou        107.2342       26.5861          134       149     2012      10        30        304              0.255417      17.948700       0.219595       0.298836       0.165500   -9999.000000       0.100400       0.457000
57824     57824     guizhou        107.2342       26.5861          134       149     2012      10        31        305              0.260667      14.883911       0.000000       0.291171       0.159000       0.215400       0.091600   -9999.000000
57824     57824     guizhou        107.2342       26.5861          134       149     2012      11        01        306              0.261667      15.655914       0.000000       0.281882   -9999.000000   -9999.000000   -9999.000000       0.352000
57824     57824     guizhou        107.2342       26.5861          134       149     2012      11        02        307              0.259625      15.680725       0.000000       0.278946   -9999.000000       0.141000   -9999.000000   -9999.000000
57824     57824     guizhou        107.2342       26.5861          134       149     2012      11        03        308              0.256208      17.175323       0.672255       0.275802       0.168000       0.287800       0.090500       0.395000
57824     57824     guizhou        107.2342       26.5861          134       149     2012      11        04        309              0.251667      16.152924       0.746415       0.278522       0.159500   -9999.000000       0.101900       0.363000
57824     57824     guizhou        107.2342       26.5861          134       149     2012      11        05        310              0.247000      17.105072       9.662136       0.275484       0.190000       0.103300       0.047100   -9999.000000
57824     57824     guizhou        107.2342       26.5861          134       149     2012      11        06        311              0.251125      13.320251       7.534538       0.290371   -9999.000000   -9999.000000   -9999.000000       0.438000
57824     57824     guizhou        107.2342       26.5861          134       149     2012      11        07        312              0.265458      11.956787       4.790660       0.303873   -9999.000000       0.138900   -9999.000000   -9999.000000
57824     57824     guizhou        107.2342       26.5861          134       149     2012      11        08        313              0.292417      11.711823       0.399325       0.302146       0.193000       0.315700   -9999.000000       0.586000
57824     57824     guizhou        107.2342       26.5861          134       149     2012      11        09        314              0.297000      12.024414       0.140294       0.292124       0.192000   -9999.000000       0.048900       0.516000
57824     57824     guizhou        107.2342       26.5861          134       149     2012      11        10        315              0.300333      12.123718       0.000000       0.286740       0.170500       0.079200       0.052100       0.359000
57824     57824     guizhou        107.2342       26.5861          134       149     2012      11        11        316              0.296167      13.035370       0.000000       0.283064       0.116000   -9999.000000       0.044600       0.441000
57824     57824     guizhou        107.2342       26.5861          134       149     2012      11        12        317              0.295000      12.916168       0.000000       0.280641   -9999.000000       0.163100   -9999.000000   -9999.000000
57824     57824     guizhou        107.2342       26.5861          134       149     2012      11        13        318              0.000000      12.203156       0.130412       0.280453       0.118000       0.251500   -9999.000000       0.315000
57824     57824     guizhou        107.2342       26.5861          134       149     2012      11        14        319              0.292000      12.972870       0.000000       0.280133       0.127500   -9999.000000   -9999.000000   -9999.000000
57824     57824     guizhou        107.2342       26.5861          134       149     2012      11        15        320              0.290250      14.897186      14.389338       0.279790       0.128000       0.368600       0.128800       0.521000
57824     57824     guizhou        107.2342       26.5861          134       149     2012      11        16        321              0.307958      16.077179       8.559034       0.297935       0.125000   -9999.000000       0.126600       0.491000
57824     57824     guizhou        107.2342       26.5861          134       149     2012      11        17        322              0.000000      11.877625       0.000000       0.310406   -9999.000000   -9999.000000       0.110300   -9999.000000
57824     57824     guizhou        107.2342       26.5861          134       149     2012      11        18        323              0.307583      12.414581       0.000000       0.290757   -9999.000000       0.209800   -9999.000000       0.342000
57824     57824     guizhou        107.2342       26.5861          134       149     2012      11        19        324              0.306500      14.454712       0.320391       0.284476       0.135000   -9999.000000   -9999.000000   -9999.000000
57824     57824     guizhou        107.2342       26.5861          134       149     2012      11        20        325              0.303000      12.963043       1.450071       0.284362       0.139000       0.095700       0.048700       0.456000
57824     57824     guizhou        107.2342       26.5861          134       149     2012      11        21        326              0.300500      14.145966       0.910174       0.283417       0.103000       0.270900       0.056400       0.392000
57824     57824     guizhou        107.2342       26.5861          134       149     2012      11        22        327              0.296083      13.173981       0.000000       0.281889   -9999.000000   -9999.000000       0.045400   -9999.000000
57824     57824     guizhou        107.2342       26.5861          134       149     2012      11        23        328              0.292417      11.353882       0.160535       0.281435   -9999.000000       0.095200   -9999.000000       0.283000
57824     57824     guizhou        107.2342       26.5861          134       149     2012      11        24        329              0.290000       8.893372       0.357373       0.280557       0.105000   -9999.000000   -9999.000000   -9999.000000
57824     57824     guizhou        107.2342       26.5861          134       149     2012      11        25        330              0.287625       9.738586       0.909270       0.281123       0.109500       0.217800   -9999.000000       0.400000
57824     57824     guizhou        107.2342       26.5861          134       149     2012      11        26        331              0.284167       8.755005       0.134470       0.282359       0.109000       0.329900   -9999.000000   -9999.000000
57824     57824     guizhou        107.2342       26.5861          134       149     2012      11        27        332              0.281417       6.966644       0.862399       0.281556       0.107000   -9999.000000       0.075200       0.475000
57824     57824     guizhou        107.2342       26.5861          134       149     2012      11        28        333              0.278750       7.835144       0.179521       0.282032   -9999.000000       0.096900       0.063200       0.327000
57824     57824     guizhou        107.2342       26.5861          134       149     2012      11        29        334              0.276417       8.118622       1.268729       0.281200   -9999.000000   -9999.000000   -9999.000000   -9999.000000
57824     57824     guizhou        107.2342       26.5861          134       149     2012      11        30        335              0.276000       8.352783       1.739687       0.283159       0.122000       0.170900   -9999.000000       0.412000
57824     57824     guizhou        107.2342       26.5861          134       149     2012      12        01        336              0.276000       6.872681       0.735919       0.284758       0.160000       0.229700       0.079900   -9999.000000
57824     57824     guizhou        107.2342       26.5861          134       149     2012      12        02        337              0.273458       6.560852       0.324591       0.282450       0.146000   -9999.000000       0.070400       0.368000
57824     57824     guizhou        107.2342       26.5861          134       149     2012      12        03        338              0.269667       9.876160       0.000000       0.278904   -9999.000000       0.233900       0.080700       0.294000
57824     57824     guizhou        107.2342       26.5861          134       149     2012      12        04        339              0.266333       8.323273       0.000000       0.277820   -9999.000000   -9999.000000   -9999.000000   -9999.000000
57824     57824     guizhou        107.2342       26.5861          134       149     2012      12        05        340              0.259368       7.776581       0.000000       0.276970   -9999.000000       0.286300   -9999.000000       0.140000
57824     57824     guizhou        107.2342       26.5861          134       149     2012      12        06        341              0.253667       8.804565       0.000000       0.274092       0.150000       0.285700   -9999.000000   -9999.000000
57824     57824     guizhou        107.2342       26.5861          134       149     2012      12        07        342              0.251167      10.260254       0.000000       0.272878       0.152000   -9999.000000       0.074100       0.308000
57824     57824     guizhou        107.2342       26.5861          134       149     2012      12        08        343              0.247833       8.217560       0.173897       0.273743       0.156000       0.173300       0.084900       0.269000
57824     57824     guizhou        107.2342       26.5861          134       149     2012      12        09        344              0.247000       8.408813       2.589254       0.273850   -9999.000000       0.291000       0.074600       0.272000
57824     57824     guizhou        107.2342       26.5861          134       149     2012      12        10        345              0.247000       6.824310       0.637087       0.280529       0.166000   -9999.000000   -9999.000000       0.334000
57824     57824     guizhou        107.2342       26.5861          134       149     2012      12        11        346              0.247000       5.828796       0.338876       0.280830       0.135500       0.095300   -9999.000000   -9999.000000
57824     57824     guizhou        107.2342       26.5861          134       149     2012      12        12        347              0.247182       6.460815       0.216728       0.277070       0.128000   -9999.000000   -9999.000000       0.387000
57824     57824     guizhou        107.2342       26.5861          134       149     2012      12        13        348              0.247333       7.385712       0.000000       0.276691       0.118500       0.149800       0.072500   -9999.000000
57824     57824     guizhou        107.2342       26.5861          134       149     2012      12        14        349              0.243208      14.040771       0.000000       0.273767   -9999.000000       0.146100       0.080700       0.280000
57824     57824     guizhou        107.2342       26.5861          134       149     2012      12        15        350              0.000000      14.371368       0.344226       0.269932   -9999.000000   -9999.000000       0.068100       0.353000
57824     57824     guizhou        107.2342       26.5861          134       149     2012      12        16        351              0.233833      12.573303       1.819073       0.269481       0.131500       0.128300   -9999.000000   -9999.000000
57824     57824     guizhou        107.2342       26.5861          134       149     2012      12        17        352              0.233000      10.508453       0.313201       0.269807       0.127000   -9999.000000   -9999.000000       0.218000
57824     57824     guizhou        107.2342       26.5861          134       149     2012      12        18        353              0.233000       6.936249       0.000000       0.271386       0.127000       0.172800       0.068800   -9999.000000
57824     57824     guizhou        107.2342       26.5861          134       149     2012      12        19        354              0.233000       4.706329       5.001787       0.270212   -9999.000000       0.295000       0.077300       0.263000
57824     57824     guizhou        107.2342       26.5861          134       149     2012      12        20        355              0.000000       4.470703       2.080482       0.277977   -9999.000000   -9999.000000       0.077000       0.324000
57824     57824     guizhou        107.2342       26.5861          134       149     2012      12        21        356              0.234333       2.908417       0.293291       0.287083   -9999.000000       0.204400   -9999.000000   -9999.000000
57824     57824     guizhou        107.2342       26.5861          134       149     2012      12        22        357              0.237000       3.712891       0.000000       0.279052       0.128000   -9999.000000   -9999.000000       0.093000
57824     57824     guizhou        107.2342       26.5861          134       149     2012      12        23        358              0.237000       2.699310       0.219257       0.271191       0.122000   -9999.000000   -9999.000000   -9999.000000
57824     57824     guizhou        107.2342       26.5861          134       149     2012      12        24        359              0.237000       4.044373       0.512024       0.265073       0.117000       0.179900       0.080900       0.190000
57824     57824     guizhou        107.2342       26.5861          134       149     2012      12        25        360              0.237000       7.148956       2.159885       0.270815   -9999.000000   -9999.000000       0.092400   -9999.000000
57824     57824     guizhou        107.2342       26.5861          134       149     2012      12        26        361              0.000000       3.954926       0.392532       0.276037   -9999.000000       0.110800       0.082600       0.248000
57824     57824     guizhou        107.2342       26.5861          134       149     2012      12        27        362              0.237000       2.100189       0.956547       0.271510       0.129000   -9999.000000   -9999.000000       0.262000
57824     57824     guizhou        107.2342       26.5861          134       149     2012      12        28        363              0.000000       2.969391       5.491588       0.275269       0.135500   -9999.000000   -9999.000000   -9999.000000
57824     57824     guizhou        107.2342       26.5861          134       149     2012      12        29        364              0.000000       5.817261       4.619592       0.285510   -9999.000000       0.243700   -9999.000000       0.003000
57824     57824     guizhou        107.2342       26.5861          134       149     2012      12        30        365              0.000000       2.069336       4.264843       0.273003   -9999.000000   -9999.000000       0.081600   -9999.000000
57824     57824     guizhou        107.2342       26.5861          134       149     2012      12        31        366              0.251267       2.307465       0.104218       0.268798   -9999.000000       0.187500       0.066800   -9999.000000
