# Supplementary material for: Research on Fusing Multisatellite Soil Moisture Data Based on Bayesian Model Averaging
Source: Hindawi journal article supplement (doi:10.1155/2018/9310838), 2018-06-25
Supplement: f1 [file 9310838.f1.zip › 2012_sm00-10cm_daily_ZDB_ZHY_57827_366days_allin.txt]

57827     57827     guizhou        107.5139       26.3228          135       150     2012      01        01        001              0.000000   -9999.000000       1.470486   -9999.000000       0.099500   -9999.000000   -9999.000000   -9999.000000
57827     57827     guizhou        107.5139       26.3228          135       150     2012      01        02        002              0.357083       3.566040       3.284496       0.280662   -9999.000000       0.099300   -9999.000000       0.282000
57827     57827     guizhou        107.5139       26.3228          135       150     2012      01        03        003              0.000000       3.477692       5.691706       0.291024   -9999.000000   -9999.000000   -9999.000000   -9999.000000
57827     57827     guizhou        107.5139       26.3228          135       150     2012      01        04        004              0.369043       1.300323       0.479411       0.280383   -9999.000000   -9999.000000       0.045400       0.147000
57827     57827     guizhou        107.5139       26.3228          135       150     2012      01        05        005              0.374417       0.663361       1.712726       0.235962   -9999.000000   -9999.000000       0.047400   -9999.000000
57827     57827     guizhou        107.5139       26.3228          135       150     2012      01        06        006              0.382739       0.323608       3.623042       0.200323   -9999.000000   -9999.000000       0.044900       0.162000
57827     57827     guizhou        107.5139       26.3228          135       150     2012      01        07        007              0.380958       0.561981       1.141759       0.210278   -9999.000000       0.202700   -9999.000000       0.343000
57827     57827     guizhou        107.5139       26.3228          135       150     2012      01        08        008              0.000000       0.594696       1.452701       0.212926   -9999.000000   -9999.000000   -9999.000000   -9999.000000
57827     57827     guizhou        107.5139       26.3228          135       150     2012      01        09        009              0.369000       1.142395       0.398938       0.244192   -9999.000000       0.153500   -9999.000000       0.313000
57827     57827     guizhou        107.5139       26.3228          135       150     2012      01        10        010              0.369042       1.835846       0.811158       0.267402       0.108000       0.067000       0.038100   -9999.000000
57827     57827     guizhou        107.5139       26.3228          135       150     2012      01        11        011              0.370565       1.875336       0.178718       0.268885       0.081000   -9999.000000       0.036200       0.168000
57827     57827     guizhou        107.5139       26.3228          135       150     2012      01        12        012              0.376455       1.230957       1.809398       0.261106       0.081500       0.161000   -9999.000000       0.370000
57827     57827     guizhou        107.5139       26.3228          135       150     2012      01        13        013              0.380750       1.789734       1.579683       0.275287   -9999.000000   -9999.000000   -9999.000000       0.423000
57827     57827     guizhou        107.5139       26.3228          135       150     2012      01        14        014              0.389708       2.481201      20.077654       0.285715   -9999.000000       0.140300   -9999.000000       0.411000
57827     57827     guizhou        107.5139       26.3228          135       150     2012      01        15        015              0.376333       2.170502       0.224573       0.305595       0.092000   -9999.000000       0.036400   -9999.000000
57827     57827     guizhou        107.5139       26.3228          135       150     2012      01        16        016              0.372091       1.948761       1.320962       0.307919       0.081500   -9999.000000       0.043000       0.212000
57827     57827     guizhou        107.5139       26.3228          135       150     2012      01        17        017              0.000000       2.836395       3.027580       0.297749       0.088000   -9999.000000       0.038300   -9999.000000
57827     57827     guizhou        107.5139       26.3228          135       150     2012      01        18        018              0.381125       1.398560       1.626830       0.284489   -9999.000000   -9999.000000   -9999.000000       0.361000
57827     57827     guizhou        107.5139       26.3228          135       150     2012      01        19        019              0.382667       1.475922       1.587306       0.277433   -9999.000000   -9999.000000   -9999.000000       0.473000
57827     57827     guizhou        107.5139       26.3228          135       150     2012      01        20        020              0.385542       1.583130       1.479183       0.278515   -9999.000000   -9999.000000   -9999.000000   -9999.000000
57827     57827     guizhou        107.5139       26.3228          135       150     2012      01        21        021              0.380652       1.291016       0.414278       0.272667   -9999.000000   -9999.000000       0.037200       0.333000
57827     57827     guizhou        107.5139       26.3228          135       150     2012      01        22        022              0.375500       0.872803       0.000000       0.249388   -9999.000000   -9999.000000       0.031700   -9999.000000
57827     57827     guizhou        107.5139       26.3228          135       150     2012      01        23        023              0.368250       0.040314       0.933973       0.184156   -9999.000000   -9999.000000       0.030200       0.269000
57827     57827     guizhou        107.5139       26.3228          135       150     2012      01        24        024              0.370739       0.011719       0.081927       0.174087   -9999.000000   -9999.000000   -9999.000000       0.490000
57827     57827     guizhou        107.5139       26.3228          135       150     2012      01        25        025              0.365250      -0.163818       0.233226       0.165783   -9999.000000   -9999.000000   -9999.000000       0.261000
57827     57827     guizhou        107.5139       26.3228          135       150     2012      01        26        026              0.359667       0.477509       0.081536       0.189149   -9999.000000   -9999.000000       0.031300       0.284000
57827     57827     guizhou        107.5139       26.3228          135       150     2012      01        27        027              0.366833       0.794220       0.070982       0.209013       0.099000       0.132100       0.031200   -9999.000000
57827     57827     guizhou        107.5139       26.3228          135       150     2012      01        28        028              0.366250       1.124298       0.116308       0.232970       0.094000   -9999.000000       0.029000       0.346000
57827     57827     guizhou        107.5139       26.3228          135       150     2012      01        29        029              0.361625       2.113464       0.057466       0.261317   -9999.000000   -9999.000000   -9999.000000   -9999.000000
57827     57827     guizhou        107.5139       26.3228          135       150     2012      01        30        030              0.362667       1.868469       0.072665       0.265208   -9999.000000   -9999.000000   -9999.000000       0.074000
57827     57827     guizhou        107.5139       26.3228          135       150     2012      01        31        031              0.356318       2.351776       0.000000       0.267508       0.099000   -9999.000000   -9999.000000       0.269000
57827     57827     guizhou        107.5139       26.3228          135       150     2012      02        01        032              0.359208       5.460815       0.754047       0.278869       0.081000   -9999.000000       0.035100   -9999.000000
57827     57827     guizhou        107.5139       26.3228          135       150     2012      02        02        033              0.372087       5.322388       0.380069       0.283812       0.067000       0.041300       0.032700       0.244000
57827     57827     guizhou        107.5139       26.3228          135       150     2012      02        03        034              0.369696       2.273468       0.556631       0.274936   -9999.000000   -9999.000000       0.029700   -9999.000000
57827     57827     guizhou        107.5139       26.3228          135       150     2012      02        04        035              0.377667       4.313751       1.058073       0.281233   -9999.000000       0.238500   -9999.000000       0.284000
57827     57827     guizhou        107.5139       26.3228          135       150     2012      02        05        036              0.392187       5.472565       2.982814       0.284936       0.089000   -9999.000000   -9999.000000       0.421000
57827     57827     guizhou        107.5139       26.3228          135       150     2012      02        06        037              0.378000       5.664917       0.123923       0.291100       0.078000   -9999.000000   -9999.000000   -9999.000000
57827     57827     guizhou        107.5139       26.3228          135       150     2012      02        07        038              0.368708       5.560364       0.000000       0.286236       0.080000       0.205300       0.037400       0.387000
57827     57827     guizhou        107.5139       26.3228          135       150     2012      02        08        039              0.361167       4.830841       0.000000       0.281560   -9999.000000   -9999.000000       0.036400   -9999.000000
57827     57827     guizhou        107.5139       26.3228          135       150     2012      02        09        040              0.372913       1.903809       0.423625       0.259363   -9999.000000       0.056000       0.034900       0.112000
57827     57827     guizhou        107.5139       26.3228          135       150     2012      02        10        041              0.371958       1.119507       0.165342       0.239224   -9999.000000   -9999.000000   -9999.000000       0.180000
57827     57827     guizhou        107.5139       26.3228          135       150     2012      02        11        042              0.366500       1.026855       0.249424       0.233234       0.116000   -9999.000000   -9999.000000       0.322000
57827     57827     guizhou        107.5139       26.3228          135       150     2012      02        12        043              0.374417       2.396820       0.956113       0.267206       0.112000       0.216500   -9999.000000       0.346000
57827     57827     guizhou        107.5139       26.3228          135       150     2012      02        13        044              0.384870       6.342529       1.257109       0.281328   -9999.000000   -9999.000000       0.025200   -9999.000000
57827     57827     guizhou        107.5139       26.3228          135       150     2012      02        14        045              0.387522       6.542389       1.317818       0.283678   -9999.000000       0.127600   -9999.000000       0.346000
57827     57827     guizhou        107.5139       26.3228          135       150     2012      02        15        046              0.380864       4.638550       0.446340       0.285166       0.111000   -9999.000000   -9999.000000   -9999.000000
57827     57827     guizhou        107.5139       26.3228          135       150     2012      02        16        047              0.374042       3.438080       0.000000       0.282452       0.116000   -9999.000000   -9999.000000       0.196000
57827     57827     guizhou        107.5139       26.3228          135       150     2012      02        17        048              0.370286       3.149567       0.000000       0.278636       0.115500       0.075500   -9999.000000       0.169000
57827     57827     guizhou        107.5139       26.3228          135       150     2012      02        18        049              0.000000       2.051392       0.000000       0.269944   -9999.000000   -9999.000000       0.027400   -9999.000000
57827     57827     guizhou        107.5139       26.3228          135       150     2012      02        19        050              0.371000       1.344177       0.842789       0.248096   -9999.000000       0.117300       0.034200       0.148000
57827     57827     guizhou        107.5139       26.3228          135       150     2012      02        20        051              0.378783       2.909302       2.932337       0.271806   -9999.000000       0.156400       0.027700   -9999.000000
57827     57827     guizhou        107.5139       26.3228          135       150     2012      02        21        052              0.395043       4.825531       6.298062       0.285165       0.079000   -9999.000000   -9999.000000       0.526000
57827     57827     guizhou        107.5139       26.3228          135       150     2012      02        22        053              0.393056       6.463440       1.447815       0.296114       0.073000       0.154800   -9999.000000       0.637000
57827     57827     guizhou        107.5139       26.3228          135       150     2012      02        23        054              0.000000       7.027771       1.534343       0.293506       0.067000   -9999.000000       0.034000       0.364000
57827     57827     guizhou        107.5139       26.3228          135       150     2012      02        24        055              0.385588       7.285278       1.301516       0.289167   -9999.000000       0.048600       0.029900       0.319000
57827     57827     guizhou        107.5139       26.3228          135       150     2012      02        25        056              0.383435       6.140106       0.289210       0.288173   -9999.000000       0.259000       0.030500   -9999.000000
57827     57827     guizhou        107.5139       26.3228          135       150     2012      02        26        057              0.377227       3.112701       0.083700       0.277678   -9999.000000   -9999.000000       0.026600       0.176000
57827     57827     guizhou        107.5139       26.3228          135       150     2012      02        27        058              0.377875       1.604950       0.594661       0.255380   -9999.000000   -9999.000000   -9999.000000   -9999.000000
57827     57827     guizhou        107.5139       26.3228          135       150     2012      02        28        059              0.377208       1.735199       0.500988       0.259676       0.072000   -9999.000000   -9999.000000       0.183000
57827     57827     guizhou        107.5139       26.3228          135       150     2012      02        29        060              0.000000   -9999.000000       0.439303   -9999.000000       0.069000       0.018200   -9999.000000   -9999.000000
57827     57827     guizhou        107.5139       26.3228          135       150     2012      03        01        061              0.366167       1.945404       0.624661       0.266424   -9999.000000       0.128800       0.036300   -9999.000000
57827     57827     guizhou        107.5139       26.3228          135       150     2012      03        02        062              0.364250       7.219727       0.492728       0.279302   -9999.000000   -9999.000000       0.031300       0.397000
57827     57827     guizhou        107.5139       26.3228          135       150     2012      03        03        063              0.376500       6.416046       4.502426       0.281854       0.101000       0.111300   -9999.000000   -9999.000000
57827     57827     guizhou        107.5139       26.3228          135       150     2012      03        04        064              0.387250       6.478485       3.807372       0.288950       0.098000       0.062400   -9999.000000       0.378000
57827     57827     guizhou        107.5139       26.3228          135       150     2012      03        05        065              0.381130       5.666595       0.441527       0.296379       0.096000   -9999.000000   -9999.000000       0.521000
57827     57827     guizhou        107.5139       26.3228          135       150     2012      03        06        066              0.382500       9.329773       0.597986       0.285804   -9999.000000       0.067400       0.034000   -9999.000000
57827     57827     guizhou        107.5139       26.3228          135       150     2012      03        07        067              0.000000       5.534821       0.425195       0.284840   -9999.000000   -9999.000000       0.038900       0.390000
57827     57827     guizhou        107.5139       26.3228          135       150     2012      03        08        068              0.379174       4.050171       0.347591       0.282855       0.108500   -9999.000000       0.033300   -9999.000000
57827     57827     guizhou        107.5139       26.3228          135       150     2012      03        09        069              0.376348       3.304016       0.114111       0.282161       0.099500   -9999.000000   -9999.000000       0.272000
57827     57827     guizhou        107.5139       26.3228          135       150     2012      03        10        070              0.368261       3.605042       0.000000       0.280826       0.096500   -9999.000000   -9999.000000       0.464000
57827     57827     guizhou        107.5139       26.3228          135       150     2012      03        11        071              0.358130       7.236450       0.000000       0.278284   -9999.000000       0.196800       0.033900       0.322000
57827     57827     guizhou        107.5139       26.3228          135       150     2012      03        12        072              0.355261       7.285431       0.000000       0.277161   -9999.000000   -9999.000000       0.035000       0.277000
57827     57827     guizhou        107.5139       26.3228          135       150     2012      03        13        073              0.348750       5.880524       0.190554       0.277560       0.119000       0.133400       0.037200   -9999.000000
57827     57827     guizhou        107.5139       26.3228          135       150     2012      03        14        074              0.342609      12.208344       0.448550       0.274165       0.116500       0.160600   -9999.000000       0.309000
57827     57827     guizhou        107.5139       26.3228          135       150     2012      03        15        075              0.336208      10.435547       0.329460       0.276628       0.105000   -9999.000000   -9999.000000   -9999.000000
57827     57827     guizhou        107.5139       26.3228          135       150     2012      03        16        076              0.330833      14.068298       0.072142       0.275075   -9999.000000       0.224700   -9999.000000       0.378000
57827     57827     guizhou        107.5139       26.3228          135       150     2012      03        17        077              0.323000      12.886169       0.000000       0.274587   -9999.000000   -9999.000000       0.032700       0.472000
57827     57827     guizhou        107.5139       26.3228          135       150     2012      03        18        078              0.310167      17.390106       0.000000       0.270967       0.107000       0.067800       0.035800   -9999.000000
57827     57827     guizhou        107.5139       26.3228          135       150     2012      03        19        079              0.286478      19.801208       0.000000       0.268931       0.103000       0.429000       0.047700       0.284000
57827     57827     guizhou        107.5139       26.3228          135       150     2012      03        20        080              0.270583      21.676178       0.937811       0.261562       0.102000   -9999.000000   -9999.000000   -9999.000000
57827     57827     guizhou        107.5139       26.3228          135       150     2012      03        21        081              0.265211      17.694092       0.187155       0.261289       0.093000       0.071500   -9999.000000       0.370000
57827     57827     guizhou        107.5139       26.3228          135       150     2012      03        22        082              0.301458      18.328491      15.268178       0.262497   -9999.000000       0.015100   -9999.000000       0.493000
57827     57827     guizhou        107.5139       26.3228          135       150     2012      03        23        083              0.354565      14.474731       0.411983       0.290526       0.105000   -9999.000000       0.049100       0.362000
57827     57827     guizhou        107.5139       26.3228          135       150     2012      03        24        084              0.337625       8.692230       0.000000       0.290332       0.097500       0.117700       0.044000       0.400000
57827     57827     guizhou        107.5139       26.3228          135       150     2012      03        25        085              0.000000      13.570282       0.236449       0.276884       0.089500   -9999.000000       0.047600   -9999.000000
57827     57827     guizhou        107.5139       26.3228          135       150     2012      03        26        086              0.295208      14.722260       1.252310       0.271861       0.091000       0.093500   -9999.000000       0.418000
57827     57827     guizhou        107.5139       26.3228          135       150     2012      03        27        087              0.336435      15.854370      13.756348       0.269629   -9999.000000       0.143400   -9999.000000   -9999.000000
57827     57827     guizhou        107.5139       26.3228          135       150     2012      03        28        088              0.382826      15.421600       6.859815       0.293463   -9999.000000   -9999.000000       0.064700       0.716000
57827     57827     guizhou        107.5139       26.3228          135       150     2012      03        29        089              0.394917      14.151703      11.254082       0.307435       0.123500       0.262800       0.057200       0.738000
57827     57827     guizhou        107.5139       26.3228          135       150     2012      03        30        090              0.384583      14.111023       4.856081       0.311300       0.099500   -9999.000000       0.057800   -9999.000000
57827     57827     guizhou        107.5139       26.3228          135       150     2012      03        31        091              0.365083      12.605072       1.221957       0.303728       0.090500       0.187200   -9999.000000       0.537000
57827     57827     guizhou        107.5139       26.3228          135       150     2012      04        01        092              0.341333      14.124115       0.000000       0.290117   -9999.000000       0.297700   -9999.000000   -9999.000000
57827     57827     guizhou        107.5139       26.3228          135       150     2012      04        02        093              0.312625      17.591583       0.000000       0.279598   -9999.000000   -9999.000000   -9999.000000       0.320000
57827     57827     guizhou        107.5139       26.3228          135       150     2012      04        03        094              0.298917      20.177521       0.212543       0.274224       0.110000       0.220000       0.057700       0.238000
57827     57827     guizhou        107.5139       26.3228          135       150     2012      04        04        095              0.289792      17.942963       0.872461       0.276467       0.105000   -9999.000000       0.064900   -9999.000000
57827     57827     guizhou        107.5139       26.3228          135       150     2012      04        05        096              0.280292      19.153320       2.348051       0.274414       0.102000       0.009800       0.058400       0.510000
57827     57827     guizhou        107.5139       26.3228          135       150     2012      04        06        097              0.291708      17.204803       0.482393       0.275992   -9999.000000       0.140300   -9999.000000   -9999.000000
57827     57827     guizhou        107.5139       26.3228          135       150     2012      04        07        098              0.285500      15.684967       0.068842       0.276250   -9999.000000   -9999.000000   -9999.000000       0.218000
57827     57827     guizhou        107.5139       26.3228          135       150     2012      04        08        099              0.279917      12.927155       6.199167       0.274568       0.116000       0.210800   -9999.000000       0.315000
57827     57827     guizhou        107.5139       26.3228          135       150     2012      04        09        100              0.300833      15.376282       0.100253       0.282775       0.108500       0.111600       0.048700       0.508000
57827     57827     guizhou        107.5139       26.3228          135       150     2012      04        10        101              0.291042      16.757050       0.000000       0.286786       0.100500   -9999.000000       0.048100       0.530000
57827     57827     guizhou        107.5139       26.3228          135       150     2012      04        11        102              0.276565      20.573547       0.257734       0.275980       0.095000       0.194300       0.046000   -9999.000000
57827     57827     guizhou        107.5139       26.3228          135       150     2012      04        12        103              0.326000      21.469299      19.138876       0.270849   -9999.000000   -9999.000000   -9999.000000       0.535000
57827     57827     guizhou        107.5139       26.3228          135       150     2012      04        13        104              0.351375      19.673065       0.286899       0.307883       0.139000       0.096400   -9999.000000   -9999.000000
57827     57827     guizhou        107.5139       26.3228          135       150     2012      04        14        105              0.350083      14.870392       0.185507       0.290444       0.125000       0.040900       0.057600       0.507000
57827     57827     guizhou        107.5139       26.3228          135       150     2012      04        15        106              0.350417      15.113129       0.000000       0.284465       0.116500   -9999.000000       0.048900       0.517000
57827     57827     guizhou        107.5139       26.3228          135       150     2012      04        16        107              0.338875      15.851074       0.000000       0.280262       0.103000       0.094700       0.079100   -9999.000000
57827     57827     guizhou        107.5139       26.3228          135       150     2012      04        17        108              0.342208      18.399780       1.028110       0.275046   -9999.000000   -9999.000000   -9999.000000       0.318000
57827     57827     guizhou        107.5139       26.3228          135       150     2012      04        18        109              0.358333      17.153381       0.000000       0.275170   -9999.000000       0.122700   -9999.000000   -9999.000000
57827     57827     guizhou        107.5139       26.3228          135       150     2012      04        19        110              0.346565      18.297852       2.433301       0.273257       0.104000       0.129000   -9999.000000       0.435000
57827     57827     guizhou        107.5139       26.3228          135       150     2012      04        20        111              0.349417      19.993958       0.584618       0.273360       0.109500   -9999.000000       0.071900       0.604000
57827     57827     guizhou        107.5139       26.3228          135       150     2012      04        21        112              0.328625      17.482086       0.000000       0.274967       0.093000       0.037700       0.075100       0.476000
57827     57827     guizhou        107.5139       26.3228          135       150     2012      04        22        113              0.301083      20.088043       1.529248       0.266103   -9999.000000   -9999.000000   -9999.000000       0.502000
57827     57827     guizhou        107.5139       26.3228          135       150     2012      04        23        114              0.277826      21.958740       0.000000       0.262980   -9999.000000   -9999.000000   -9999.000000   -9999.000000
57827     57827     guizhou        107.5139       26.3228          135       150     2012      04        24        115              0.276348      22.465454       6.725635       0.263403       0.083000       0.093500   -9999.000000       0.480000
57827     57827     guizhou        107.5139       26.3228          135       150     2012      04        25        116              0.000000      23.705933       0.000000       0.271412       0.131500   -9999.000000   -9999.000000   -9999.000000
57827     57827     guizhou        107.5139       26.3228          135       150     2012      04        26        117              0.305391      15.528107       0.143125       0.275062       0.107500       0.134500       0.109400       0.453000
57827     57827     guizhou        107.5139       26.3228          135       150     2012      04        27        118              0.291000      19.652283       0.000000       0.264905       0.101000       0.127700       0.099000       0.462000
57827     57827     guizhou        107.5139       26.3228          135       150     2012      04        28        119              0.319375      20.970856      29.407471       0.262365   -9999.000000   -9999.000000       0.088700   -9999.000000
57827     57827     guizhou        107.5139       26.3228          135       150     2012      04        29        120              0.349167      21.396790       1.169583       0.309075       0.135000       0.165800   -9999.000000       0.587000
57827     57827     guizhou        107.5139       26.3228          135       150     2012      04        30        121              0.340522      22.242096       0.304362       0.298420       0.114500   -9999.000000   -9999.000000   -9999.000000
57827     57827     guizhou        107.5139       26.3228          135       150     2012      05        01        122              0.331250      24.156311       0.112946       0.282673       0.153500       0.259100       0.077900       0.395000
57827     57827     guizhou        107.5139       26.3228          135       150     2012      05        02        123              0.324792      21.084412       0.611335       0.278453       0.140000       0.204400       0.083300       0.496000
57827     57827     guizhou        107.5139       26.3228          135       150     2012      05        03        124              0.334542      19.612885       1.858810       0.276982   -9999.000000   -9999.000000       0.081000   -9999.000000
57827     57827     guizhou        107.5139       26.3228          135       150     2012      05        04        125              0.359875      19.375549       0.484736       0.278860   -9999.000000       0.192600   -9999.000000       0.735000
57827     57827     guizhou        107.5139       26.3228          135       150     2012      05        05        126              0.351304      18.789825       0.079231       0.278844       0.169000   -9999.000000   -9999.000000   -9999.000000
57827     57827     guizhou        107.5139       26.3228          135       150     2012      05        06        127              0.342042      21.906219       7.889555       0.273382       0.147000       0.150000   -9999.000000       0.470000
57827     57827     guizhou        107.5139       26.3228          135       150     2012      05        07        128              0.325917      23.347443       1.200880       0.269659   -9999.000000       0.235200       0.070200       0.601000
57827     57827     guizhou        107.5139       26.3228          135       150     2012      05        08        129              0.309333      24.096191       6.285623       0.263472   -9999.000000   -9999.000000       0.072800       0.452000
57827     57827     guizhou        107.5139       26.3228          135       150     2012      05        09        130              0.365625      24.592773      10.790292       0.267226   -9999.000000       0.240100       0.074700       0.848000
57827     57827     guizhou        107.5139       26.3228          135       150     2012      05        10        131              0.370333      23.705688       4.502999       0.303160       0.175000   -9999.000000   -9999.000000   -9999.000000
57827     57827     guizhou        107.5139       26.3228          135       150     2012      05        11        132              0.370174      22.020844       0.146134       0.291045       0.163000       0.125600   -9999.000000       0.483000
57827     57827     guizhou        107.5139       26.3228          135       150     2012      05        12        133              0.378583      23.632690      11.620181       0.286586       0.173000       0.157300   -9999.000000   -9999.000000
57827     57827     guizhou        107.5139       26.3228          135       150     2012      05        13        134              0.375458      21.255096      24.321190       0.304873   -9999.000000   -9999.000000       0.089900       0.798000
57827     57827     guizhou        107.5139       26.3228          135       150     2012      05        14        135              0.378458      19.894104       1.425215       0.308051   -9999.000000       0.169000       0.070000       0.803000
57827     57827     guizhou        107.5139       26.3228          135       150     2012      05        15        136              0.370375      17.412750       0.137177       0.308892       0.193000       0.237300       0.057900   -9999.000000
57827     57827     guizhou        107.5139       26.3228          135       150     2012      05        16        137              0.361208      17.683960       0.000000       0.293302       0.185500   -9999.000000   -9999.000000       0.435000
57827     57827     guizhou        107.5139       26.3228          135       150     2012      05        17        138              0.353542      19.325439       0.000000       0.285571       0.185000       0.401700   -9999.000000   -9999.000000
57827     57827     guizhou        107.5139       26.3228          135       150     2012      05        18        139              0.358417      20.823792      23.364706       0.281529       0.168000   -9999.000000       0.062900       0.526000
57827     57827     guizhou        107.5139       26.3228          135       150     2012      05        19        140              0.379042      21.892761       0.000000       0.300087   -9999.000000       0.160600       0.060300       0.765000
57827     57827     guizhou        107.5139       26.3228          135       150     2012      05        20        141              0.366583      22.983490       0.263729       0.306163   -9999.000000       0.221700       0.060800       0.464000
57827     57827     guizhou        107.5139       26.3228          135       150     2012      05        21        142              0.398750      23.618622      11.911020       0.290293       0.193000   -9999.000000   -9999.000000       0.858000
57827     57827     guizhou        107.5139       26.3228          135       150     2012      05        22        143              0.398250      20.814270      10.911323       0.308954       0.192000       0.283100   -9999.000000   -9999.000000
57827     57827     guizhou        107.5139       26.3228          135       150     2012      05        23        144              0.400583      19.122437       6.354007       0.314708   -9999.000000   -9999.000000   -9999.000000       0.810000
57827     57827     guizhou        107.5139       26.3228          135       150     2012      05        24        145              0.410458      18.620026      31.559793       0.306300   -9999.000000       0.106000       0.058200   -9999.000000
57827     57827     guizhou        107.5139       26.3228          135       150     2012      05        25        146              0.000000      17.446991      11.867973       0.333504   -9999.000000   -9999.000000       0.056500       0.861000
57827     57827     guizhou        107.5139       26.3228          135       150     2012      05        26        147              0.389458      16.827606       1.110782       0.320696       0.169000   -9999.000000       0.052600       0.672000
57827     57827     guizhou        107.5139       26.3228          135       150     2012      05        27        148              0.391750      18.678253       4.999161       0.306140       0.172000       0.173500   -9999.000000   -9999.000000
57827     57827     guizhou        107.5139       26.3228          135       150     2012      05        28        149              0.392043      20.874451       0.210099       0.306680       0.156500   -9999.000000   -9999.000000       0.605000
57827     57827     guizhou        107.5139       26.3228          135       150     2012      05        29        150              0.395833      21.645996       9.791198       0.303786   -9999.000000       0.044900       0.061700   -9999.000000
57827     57827     guizhou        107.5139       26.3228          135       150     2012      05        30        151              0.382583      19.817078       0.073507       0.313370   -9999.000000       0.113400       0.052700   -9999.000000
57827     57827     guizhou        107.5139       26.3228          135       150     2012      05        31        152              0.373542      19.678802       1.001812       0.300344       0.177500   -9999.000000       0.057700   -9999.000000
57827     57827     guizhou        107.5139       26.3228          135       150     2012      06        01        153              0.376417      18.926422       1.294793       0.297453       0.242500       0.147000       0.058000   -9999.000000
57827     57827     guizhou        107.5139       26.3228          135       150     2012      06        02        154              0.382750      17.550781       0.530646       0.299119       0.230000       0.148500   -9999.000000       0.541000
57827     57827     guizhou        107.5139       26.3228          135       150     2012      06        03        155              0.391625      17.999664       8.443461       0.296076   -9999.000000   -9999.000000   -9999.000000   -9999.000000
57827     57827     guizhou        107.5139       26.3228          135       150     2012      06        04        156              0.401250      18.460114       5.720933       0.304830   -9999.000000       0.252400       0.049600       0.742000
57827     57827     guizhou        107.5139       26.3228          135       150     2012      06        05        157              0.395958      18.266998       1.865289       0.310423       0.230000   -9999.000000       0.054600       0.656000
57827     57827     guizhou        107.5139       26.3228          135       150     2012      06        06        158              0.397792      19.941101       6.110385       0.301233       0.248000       0.162700       0.050100       0.870000
57827     57827     guizhou        107.5139       26.3228          135       150     2012      06        07        159              0.399208      20.916290      27.611040       0.304917       0.223000       0.279800   -9999.000000       0.808000
57827     57827     guizhou        107.5139       26.3228          135       150     2012      06        08        160              0.391375      20.043732       0.991101       0.331237       0.211000   -9999.000000   -9999.000000   -9999.000000
57827     57827     guizhou        107.5139       26.3228          135       150     2012      06        09        161              0.393500      22.123901      16.580004       0.307906   -9999.000000       0.152000   -9999.000000       0.597000
57827     57827     guizhou        107.5139       26.3228          135       150     2012      06        10        162              0.400917      23.912079      15.211272       0.318846       0.225000   -9999.000000       0.048700   -9999.000000
57827     57827     guizhou        107.5139       26.3228          135       150     2012      06        11        163              0.000000      22.573975       0.095885       0.326388       0.154000       0.144400       0.057100       0.569000
57827     57827     guizhou        107.5139       26.3228          135       150     2012      06        12        164              0.382750      21.309296       1.480554       0.311543       0.145000       0.403200       0.056400       0.688000
57827     57827     guizhou        107.5139       26.3228          135       150     2012      06        13        165              0.377000      20.493591       0.098812       0.306643       0.141000   -9999.000000   -9999.000000   -9999.000000
57827     57827     guizhou        107.5139       26.3228          135       150     2012      06        14        166              0.371875      22.156769       0.486464       0.302592   -9999.000000       0.183300   -9999.000000       0.464000
57827     57827     guizhou        107.5139       26.3228          135       150     2012      06        15        167              0.365833      21.087463       0.000000       0.298500   -9999.000000   -9999.000000       0.054100   -9999.000000
57827     57827     guizhou        107.5139       26.3228          135       150     2012      06        16        168              0.355708      21.905457       0.000000       0.292955       0.128500       0.112800       0.049000       0.477000
57827     57827     guizhou        107.5139       26.3228          135       150     2012      06        17        169              0.345000      22.391754       0.000000       0.287511       0.124500       0.239700       0.050200       0.485000
57827     57827     guizhou        107.5139       26.3228          135       150     2012      06        18        170              0.279000      22.855408       0.586603       0.286360       0.120000   -9999.000000   -9999.000000       0.482000
57827     57827     guizhou        107.5139       26.3228          135       150     2012      06        19        171              0.281143      22.129730       5.260969       0.286649   -9999.000000       0.356000   -9999.000000       0.583000
57827     57827     guizhou        107.5139       26.3228          135       150     2012      06        20        172              0.280042      19.045746       0.000000       0.299127   -9999.000000   -9999.000000   -9999.000000   -9999.000000
57827     57827     guizhou        107.5139       26.3228          135       150     2012      06        21        173              0.266250      22.780396       2.382098       0.287298       0.190000   -9999.000000       0.107300       0.628000
57827     57827     guizhou        107.5139       26.3228          135       150     2012      06        22        174              0.295208      23.049500      12.438332       0.289201       0.207000       0.286600       0.128000   -9999.000000
57827     57827     guizhou        107.5139       26.3228          135       150     2012      06        23        175              0.320083      20.519440       2.882732       0.308985       0.197000   -9999.000000       0.111000       0.557000
57827     57827     guizhou        107.5139       26.3228          135       150     2012      06        24        176              0.323208      21.016479      21.670305       0.303288   -9999.000000       0.159400   -9999.000000       0.628000
57827     57827     guizhou        107.5139       26.3228          135       150     2012      06        25        177              0.332522      23.220123      17.877100       0.311550   -9999.000000       0.194500   -9999.000000   -9999.000000
57827     57827     guizhou        107.5139       26.3228          135       150     2012      06        26        178              0.337875      23.008698      17.614925       0.324505       0.186000   -9999.000000   -9999.000000       0.715000
57827     57827     guizhou        107.5139       26.3228          135       150     2012      06        27        179              0.330958      22.653412      24.069506       0.325788       0.197000       0.186900       0.100700   -9999.000000
57827     57827     guizhou        107.5139       26.3228          135       150     2012      06        28        180              0.331125      23.057861       2.085533       0.328876       0.193000   -9999.000000       0.103000       0.703000
57827     57827     guizhou        107.5139       26.3228          135       150     2012      06        29        181              0.317583      22.931793       3.585504       0.316592       0.162000       0.121400       0.088300       0.799000
57827     57827     guizhou        107.5139       26.3228          135       150     2012      06        30        182              0.317958      24.715881       7.113095       0.308436   -9999.000000       0.269500   -9999.000000   -9999.000000
57827     57827     guizhou        107.5139       26.3228          135       150     2012      07        01        183              0.321542      26.025879       0.045348       0.310414       0.197000   -9999.000000   -9999.000000       0.668000
57827     57827     guizhou        107.5139       26.3228          135       150     2012      07        02        184              0.305478      24.109100       0.443478       0.303952       0.211000       0.193300       0.071600   -9999.000000
57827     57827     guizhou        107.5139       26.3228          135       150     2012      07        03        185              0.292083      23.429535       0.554869       0.297387       0.189500   -9999.000000       0.066600       0.553000
57827     57827     guizhou        107.5139       26.3228          135       150     2012      07        04        186              0.276667      24.066681       1.052111       0.292494       0.188000       0.281300       0.066400       0.586000
57827     57827     guizhou        107.5139       26.3228          135       150     2012      07        05        187              0.254826      23.740540       0.000000       0.289059   -9999.000000       0.217600   -9999.000000       0.473000
57827     57827     guizhou        107.5139       26.3228          135       150     2012      07        06        188              0.233792      24.636108       0.000000       0.285483   -9999.000000   -9999.000000   -9999.000000       0.594000
57827     57827     guizhou        107.5139       26.3228          135       150     2012      07        07        189              0.213375      25.158691       0.593373       0.282799   -9999.000000       0.401300   -9999.000000   -9999.000000
57827     57827     guizhou        107.5139       26.3228          135       150     2012      07        08        190              0.200833      25.236145       0.000000       0.280437       0.186000   -9999.000000       0.062500       0.404000
57827     57827     guizhou        107.5139       26.3228          135       150     2012      07        09        191              0.188708      24.292542       0.511005       0.280019       0.168500       0.283000       0.120400   -9999.000000
57827     57827     guizhou        107.5139       26.3228          135       150     2012      07        10        192              0.177208      24.413422       0.634658       0.278763   -9999.000000       0.212600       0.111600       0.475000
57827     57827     guizhou        107.5139       26.3228          135       150     2012      07        11        193              0.168333      25.684753       0.479991       0.275986   -9999.000000   -9999.000000   -9999.000000       0.546000
57827     57827     guizhou        107.5139       26.3228          135       150     2012      07        12        194              0.161042      26.215576      15.584087       0.274045   -9999.000000       0.075300   -9999.000000   -9999.000000
57827     57827     guizhou        107.5139       26.3228          135       150     2012      07        13        195              0.265250      24.909088      34.221355       0.294308       0.222000       0.255300   -9999.000000       0.573000
57827     57827     guizhou        107.5139       26.3228          135       150     2012      07        14        196              0.275250      23.415344       1.588047       0.333069       0.210500   -9999.000000       0.116100   -9999.000000
57827     57827     guizhou        107.5139       26.3228          135       150     2012      07        15        197              0.295167      25.513550      23.316011       0.300892       0.194000       0.154600       0.103600       0.631000
57827     57827     guizhou        107.5139       26.3228          135       150     2012      07        16        198              0.332542      25.146179      55.253426       0.319140   -9999.000000   -9999.000000       0.160000       0.947000
57827     57827     guizhou        107.5139       26.3228          135       150     2012      07        17        199              0.327083      23.619324      34.733788       0.351789   -9999.000000       0.167000   -9999.000000       0.838000
57827     57827     guizhou        107.5139       26.3228          135       150     2012      07        18        200              0.321458      23.482666      25.423521       0.410096       0.227000       0.254000   -9999.000000       0.838000
57827     57827     guizhou        107.5139       26.3228          135       150     2012      07        19        201              0.315292      24.020844       6.165027       0.362546       0.220000   -9999.000000       0.150300   -9999.000000
57827     57827     guizhou        107.5139       26.3228          135       150     2012      07        20        202              0.295125      24.126038       1.866069       0.340947       0.177000       0.174400       0.148600       0.593000
57827     57827     guizhou        107.5139       26.3228          135       150     2012      07        21        203              0.268458      25.077332       2.868157       0.320600   -9999.000000   -9999.000000       0.141700   -9999.000000
57827     57827     guizhou        107.5139       26.3228          135       150     2012      07        22        204              0.253750      25.947784       4.790451       0.309476   -9999.000000       0.262800   -9999.000000       0.442000
57827     57827     guizhou        107.5139       26.3228          135       150     2012      07        23        205              0.286696      26.055267       5.290835       0.308180       0.315000       0.202000   -9999.000000       0.623000
57827     57827     guizhou        107.5139       26.3228          135       150     2012      07        24        206              0.322333      23.967194      18.297764       0.311149       0.343500   -9999.000000   -9999.000000   -9999.000000
57827     57827     guizhou        107.5139       26.3228          135       150     2012      07        25        207              0.335792      23.187408      26.006342       0.323068       0.354000       0.257900       0.094400       0.996000
57827     57827     guizhou        107.5139       26.3228          135       150     2012      07        26        208              0.325583      23.702148      15.611780       0.333929       0.295000   -9999.000000       0.098400   -9999.000000
57827     57827     guizhou        107.5139       26.3228          135       150     2012      07        27        209              0.321500      24.020416       6.728116       0.331669   -9999.000000       0.063800       0.082300       0.657000
57827     57827     guizhou        107.5139       26.3228          135       150     2012      07        28        210              0.323292      24.376831       4.498571       0.322231       0.304000       0.244300   -9999.000000       0.680000
57827     57827     guizhou        107.5139       26.3228          135       150     2012      07        29        211              0.306208      24.029663       0.809882       0.317442       0.317000   -9999.000000   -9999.000000   -9999.000000
57827     57827     guizhou        107.5139       26.3228          135       150     2012      07        30        212              0.285625      24.806641       1.450591       0.308020       0.308000       0.121700   -9999.000000       0.519000
57827     57827     guizhou        107.5139       26.3228          135       150     2012      07        31        213              0.269042      25.083984       3.590703       0.302856       0.269000       0.183200       0.168600   -9999.000000
57827     57827     guizhou        107.5139       26.3228          135       150     2012      08        01        214              0.278167      25.901733       1.693906       0.302839   -9999.000000   -9999.000000       0.173300       0.497000
57827     57827     guizhou        107.5139       26.3228          135       150     2012      08        02        215              0.253083      25.845795       0.646147       0.297056   -9999.000000       0.294800       0.162200       0.600000
57827     57827     guizhou        107.5139       26.3228          135       150     2012      08        03        216              0.222250      24.747345       0.000000       0.291076       0.338500   -9999.000000   -9999.000000       0.508000
57827     57827     guizhou        107.5139       26.3228          135       150     2012      08        04        217              0.197333      25.165070       0.000000       0.285690       0.320500       0.072300   -9999.000000       0.640000
57827     57827     guizhou        107.5139       26.3228          135       150     2012      08        05        218              0.198167      25.181763      12.142776       0.282706       0.439000       0.268600       0.179400   -9999.000000
57827     57827     guizhou        107.5139       26.3228          135       150     2012      08        06        219              0.270500      24.722839       9.146358       0.304888   -9999.000000   -9999.000000       0.206200       0.609000
57827     57827     guizhou        107.5139       26.3228          135       150     2012      08        07        220              0.290667      22.650848       3.727717       0.312786   -9999.000000       0.136800       0.186100   -9999.000000
57827     57827     guizhou        107.5139       26.3228          135       150     2012      08        08        221              0.281875      23.229584       0.000000       0.303188       0.368000   -9999.000000   -9999.000000       0.470000
57827     57827     guizhou        107.5139       26.3228          135       150     2012      08        09        222              0.263500      24.819977       0.000000       0.289954       0.352500       0.213500   -9999.000000       0.558000
57827     57827     guizhou        107.5139       26.3228          135       150     2012      08        10        223              0.235792      25.636780       0.000000       0.283615       0.317500       0.321500   -9999.000000   -9999.000000
57827     57827     guizhou        107.5139       26.3228          135       150     2012      08        11        224              0.203417      25.710571       0.000000       0.280129       0.192000   -9999.000000       0.179100       0.383000
57827     57827     guizhou        107.5139       26.3228          135       150     2012      08        12        225              0.180708      26.506866       0.324781       0.277548   -9999.000000       0.255200       0.181700   -9999.000000
57827     57827     guizhou        107.5139       26.3228          135       150     2012      08        13        226              0.171542      26.865479      11.207196       0.276722   -9999.000000   -9999.000000       0.122200       0.551000
57827     57827     guizhou        107.5139       26.3228          135       150     2012      08        14        227              0.238625      26.316925       2.729435       0.285916       0.234000       0.217200   -9999.000000       0.810000
57827     57827     guizhou        107.5139       26.3228          135       150     2012      08        15        228              0.234667      26.009735       0.000000       0.300851       0.226500       0.201900   -9999.000000       0.474000
57827     57827     guizhou        107.5139       26.3228          135       150     2012      08        16        229              0.212917      26.333282       0.306903       0.284334       0.180000   -9999.000000       0.144200       0.563000
57827     57827     guizhou        107.5139       26.3228          135       150     2012      08        17        230              0.196913      27.170593       1.315586       0.277333   -9999.000000       0.151200       0.133200   -9999.000000
57827     57827     guizhou        107.5139       26.3228          135       150     2012      08        18        231              0.225875      25.691223       6.614275       0.278578   -9999.000000       0.171200       0.138700       0.673000
57827     57827     guizhou        107.5139       26.3228          135       150     2012      08        19        232              0.246042      24.822571       0.869324       0.292369       0.213000   -9999.000000   -9999.000000   -9999.000000
57827     57827     guizhou        107.5139       26.3228          135       150     2012      08        20        233              0.236750      25.293762       7.177116       0.284537       0.208000       0.323700   -9999.000000       0.494000
57827     57827     guizhou        107.5139       26.3228          135       150     2012      08        21        234              0.252333      26.394562       1.273835       0.283742       0.308000   -9999.000000   -9999.000000       0.636000
57827     57827     guizhou        107.5139       26.3228          135       150     2012      08        22        235              0.248125      24.138000       0.862055       0.287592       0.324000       0.130800       0.147200   -9999.000000
57827     57827     guizhou        107.5139       26.3228          135       150     2012      08        23        236              0.237583      20.495422       0.000000       0.285063   -9999.000000   -9999.000000       0.160300       0.429000
57827     57827     guizhou        107.5139       26.3228          135       150     2012      08        24        237              0.215708      21.972961       0.000000       0.275089   -9999.000000   -9999.000000       0.149300   -9999.000000
57827     57827     guizhou        107.5139       26.3228          135       150     2012      08        25        238              0.000000      22.418091       0.000000       0.271292       0.284500       0.190700   -9999.000000       0.399000
57827     57827     guizhou        107.5139       26.3228          135       150     2012      08        26        239              0.180458      22.415466       0.000000       0.270011       0.299500   -9999.000000   -9999.000000       0.480000
57827     57827     guizhou        107.5139       26.3228          135       150     2012      08        27        240              0.170542      23.393768       0.864729       0.266807       0.278500       0.162200   -9999.000000   -9999.000000
57827     57827     guizhou        107.5139       26.3228          135       150     2012      08        28        241              0.160250      23.092438       0.000000       0.265960   -9999.000000       0.182800       0.088100       0.543000
57827     57827     guizhou        107.5139       26.3228          135       150     2012      08        29        242              0.154417      25.181244       0.000000       0.261579   -9999.000000   -9999.000000       0.096600   -9999.000000
57827     57827     guizhou        107.5139       26.3228          135       150     2012      08        30        243              0.148167      25.207092       1.195093       0.260536       0.290500       0.382300       0.088300       0.440000
57827     57827     guizhou        107.5139       26.3228          135       150     2012      08        31        244              0.141083      25.884674       0.717511       0.256599       0.273500   -9999.000000   -9999.000000       0.508000
57827     57827     guizhou        107.5139       26.3228          135       150     2012      09        01        245              0.136917      26.007507       0.165601       0.253201       0.212500       0.052200   -9999.000000       0.489000
57827     57827     guizhou        107.5139       26.3228          135       150     2012      09        02        246              0.136000      25.122314       1.785680       0.252570   -9999.000000       0.410100       0.099400       0.602000
57827     57827     guizhou        107.5139       26.3228          135       150     2012      09        03        247              0.134000      22.587128       0.634354       0.261043   -9999.000000   -9999.000000       0.136600   -9999.000000
57827     57827     guizhou        107.5139       26.3228          135       150     2012      09        04        248              0.131417      20.890991       0.000000       0.257139       0.234000       0.185300       0.138800       0.280000
57827     57827     guizhou        107.5139       26.3228          135       150     2012      09        05        249              0.128917      21.866638       0.234027       0.251989       0.221000       0.123100   -9999.000000   -9999.000000
57827     57827     guizhou        107.5139       26.3228          135       150     2012      09        06        250              0.126917      22.319794       0.000000       0.252806       0.219000   -9999.000000   -9999.000000       0.362000
57827     57827     guizhou        107.5139       26.3228          135       150     2012      09        07        251              0.146208      23.402588       0.085806       0.252273       0.197000       0.186500   -9999.000000       0.561000
57827     57827     guizhou        107.5139       26.3228          135       150     2012      09        08        252              0.154125      24.478760       0.557231       0.249089   -9999.000000   -9999.000000       0.140400   -9999.000000
57827     57827     guizhou        107.5139       26.3228          135       150     2012      09        09        253              0.151167      24.569427       0.181418       0.249699   -9999.000000       0.131100       0.147100       0.315000
57827     57827     guizhou        107.5139       26.3228          135       150     2012      09        10        254              0.151000      25.124207       0.209588       0.246310       0.226500       0.189900       0.175000   -9999.000000
57827     57827     guizhou        107.5139       26.3228          135       150     2012      09        11        255              0.147208      24.903473       0.318875       0.244167       0.123000   -9999.000000   -9999.000000       0.402000
57827     57827     guizhou        107.5139       26.3228          135       150     2012      09        12        256              0.186458      24.355255      21.554142       0.242338       0.139000       0.221700   -9999.000000       0.803000
57827     57827     guizhou        107.5139       26.3228          135       150     2012      09        13        257              0.255917      20.686859       5.324752       0.304964   -9999.000000   -9999.000000   -9999.000000       0.391000
57827     57827     guizhou        107.5139       26.3228          135       150     2012      09        14        258              0.248083      16.905701       0.000000       0.297253   -9999.000000       0.183900       0.173500       0.491000
57827     57827     guizhou        107.5139       26.3228          135       150     2012      09        15        259              0.219667      19.006195       0.000000       0.278106       0.134000       0.214000       0.189400   -9999.000000
57827     57827     guizhou        107.5139       26.3228          135       150     2012      09        16        260              0.205250      19.455109       1.436917       0.269665       0.161000   -9999.000000       0.175000       0.396000
57827     57827     guizhou        107.5139       26.3228          135       150     2012      09        17        261              0.201833      17.346100       0.436732       0.272949       0.141500       0.069700   -9999.000000   -9999.000000
57827     57827     guizhou        107.5139       26.3228          135       150     2012      09        18        262              0.220750      16.985809       6.510341       0.270616       0.161000   -9999.000000   -9999.000000       0.669000
57827     57827     guizhou        107.5139       26.3228          135       150     2012      09        19        263              0.237375      16.952698       0.000000       0.287147   -9999.000000       0.028200       0.079900       0.424000
57827     57827     guizhou        107.5139       26.3228          135       150     2012      09        20        264              0.243250      18.003967       7.445090       0.278565       0.149000       0.205100       0.087900   -9999.000000
57827     57827     guizhou        107.5139       26.3228          135       150     2012      09        21        265              0.278375      18.249115       6.207445       0.288753   -9999.000000   -9999.000000       0.076100       0.643000
57827     57827     guizhou        107.5139       26.3228          135       150     2012      09        22        266              0.296917      18.647461       7.362405       0.300934       0.215000       0.148700   -9999.000000   -9999.000000
57827     57827     guizhou        107.5139       26.3228          135       150     2012      09        23        267              0.313250      18.812164       9.903415       0.298821       0.195500       0.148600   -9999.000000       0.602000
57827     57827     guizhou        107.5139       26.3228          135       150     2012      09        24        268              0.316917      18.482330       4.254974       0.310368   -9999.000000   -9999.000000   -9999.000000       0.638000
57827     57827     guizhou        107.5139       26.3228          135       150     2012      09        25        269              0.315083      18.209381       0.447088       0.299832   -9999.000000       0.158100       0.084700   -9999.000000
57827     57827     guizhou        107.5139       26.3228          135       150     2012      09        26        270              0.320500      19.610962       1.364524       0.289331       0.215500   -9999.000000       0.093600       0.802000
57827     57827     guizhou        107.5139       26.3228          135       150     2012      09        27        271              0.317929      20.349030       0.000000       0.286703       0.192500       0.191200       0.085900   -9999.000000
57827     57827     guizhou        107.5139       26.3228          135       150     2012      09        28        272              0.307200      19.454773       0.000000       0.281236       0.187000   -9999.000000   -9999.000000       0.421000
57827     57827     guizhou        107.5139       26.3228          135       150     2012      09        29        273              0.293958      18.331421       0.000000       0.275667   -9999.000000   -9999.000000   -9999.000000       0.588000
57827     57827     guizhou        107.5139       26.3228          135       150     2012      09        30        274              0.274542      19.438873       0.000000       0.269095   -9999.000000       0.177400   -9999.000000       0.417000
57827     57827     guizhou        107.5139       26.3228          135       150     2012      10        01        275              0.251500      18.670410       0.000000       0.265271       0.096000   -9999.000000       0.091000       0.565000
57827     57827     guizhou        107.5139       26.3228          135       150     2012      10        02        276              0.231792      19.734467       0.174875       0.261983       0.096500       0.162100       0.098200   -9999.000000
57827     57827     guizhou        107.5139       26.3228          135       150     2012      10        03        277              0.249208      20.065094       7.533192       0.260159       0.122000       0.358200       0.099200       0.517000
57827     57827     guizhou        107.5139       26.3228          135       150     2012      10        04        278              0.301417      17.641449       5.826434       0.281846       0.120000   -9999.000000   -9999.000000   -9999.000000
57827     57827     guizhou        107.5139       26.3228          135       150     2012      10        05        279              0.327875      16.598236       5.891025       0.293727   -9999.000000       0.199500   -9999.000000       0.617000
57827     57827     guizhou        107.5139       26.3228          135       150     2012      10        06        280              0.319583      16.127716       0.314487       0.298294   -9999.000000   -9999.000000       0.101500       0.772000
57827     57827     guizhou        107.5139       26.3228          135       150     2012      10        07        281              0.314333      15.896759       0.194492       0.285303       0.112000       0.065200       0.106000   -9999.000000
57827     57827     guizhou        107.5139       26.3228          135       150     2012      10        08        282              0.311542      17.753967       1.231448       0.280114       0.109500       0.017700       0.063200       0.412000
57827     57827     guizhou        107.5139       26.3228          135       150     2012      10        09        283              0.326833      18.195099       3.686564       0.279075       0.097500   -9999.000000   -9999.000000   -9999.000000
57827     57827     guizhou        107.5139       26.3228          135       150     2012      10        10        284              0.316833      16.540588       0.000000       0.289213   -9999.000000       0.264000   -9999.000000       0.449000
57827     57827     guizhou        107.5139       26.3228          135       150     2012      10        11        285              0.308333      17.172028       0.000000       0.278397   -9999.000000       0.088600   -9999.000000       0.575000
57827     57827     guizhou        107.5139       26.3228          135       150     2012      10        12        286              0.311042      17.417023       5.204826       0.275083       0.220000   -9999.000000       0.067900   -9999.000000
57827     57827     guizhou        107.5139       26.3228          135       150     2012      10        13        287              0.332000      17.050476       1.266417       0.280942       0.222000       0.213500       0.067600       0.573000
57827     57827     guizhou        107.5139       26.3228          135       150     2012      10        14        288              0.336458      15.890076       2.737523       0.287165       0.200500   -9999.000000       0.060900   -9999.000000
57827     57827     guizhou        107.5139       26.3228          135       150     2012      10        15        289              0.334292      16.592834       0.807972       0.285801       0.171000       0.084800   -9999.000000       0.616000
57827     57827     guizhou        107.5139       26.3228          135       150     2012      10        16        290              0.334583      19.681274       9.650565       0.284681   -9999.000000       0.177300   -9999.000000   -9999.000000
57827     57827     guizhou        107.5139       26.3228          135       150     2012      10        17        291              0.312458      17.455719       0.000000       0.302112   -9999.000000   -9999.000000       0.122400       0.311000
57827     57827     guizhou        107.5139       26.3228          135       150     2012      10        18        292              0.293750      16.389526       0.000000       0.280608       0.178500       0.234100       0.113500       0.447000
57827     57827     guizhou        107.5139       26.3228          135       150     2012      10        19        293              0.282917      17.770721       0.000000       0.274483       0.183000   -9999.000000       0.123400   -9999.000000
57827     57827     guizhou        107.5139       26.3228          135       150     2012      10        20        294              0.270792      17.387634       0.215326       0.274364       0.161500       0.182400       0.108300       0.637000
57827     57827     guizhou        107.5139       26.3228          135       150     2012      10        21        295              0.254167      20.294617       1.010726       0.271107   -9999.000000       0.450600   -9999.000000   -9999.000000
57827     57827     guizhou        107.5139       26.3228          135       150     2012      10        22        296              0.262250      20.515167       5.074234       0.270394   -9999.000000   -9999.000000   -9999.000000       0.392000
57827     57827     guizhou        107.5139       26.3228          135       150     2012      10        23        297              0.268583      17.436005       4.157197       0.286609   -9999.000000       0.394000       0.062900       0.479000
57827     57827     guizhou        107.5139       26.3228          135       150     2012      10        24        298              0.329208      15.503021       5.596254       0.283794   -9999.000000   -9999.000000       0.060600   -9999.000000
57827     57827     guizhou        107.5139       26.3228          135       150     2012      10        25        299              0.000000      14.820709       0.467179       0.297326       0.176000       0.096900       0.055500       0.563000
57827     57827     guizhou        107.5139       26.3228          135       150     2012      10        26        300              0.317667      18.011261       0.000000       0.283771       0.168000       0.334000   -9999.000000   -9999.000000
57827     57827     guizhou        107.5139       26.3228          135       150     2012      10        27        301              0.310167      18.878967       0.108249       0.277521   -9999.000000   -9999.000000   -9999.000000       0.366000
57827     57827     guizhou        107.5139       26.3228          135       150     2012      10        28        302              0.000000      18.683685      10.817381       0.274517   -9999.000000       0.477800   -9999.000000       0.460000
57827     57827     guizhou        107.5139       26.3228          135       150     2012      10        29        303              0.339292      17.917114      10.079667       0.297366       0.207500   -9999.000000       0.117600       0.742000
57827     57827     guizhou        107.5139       26.3228          135       150     2012      10        30        304              0.345458      17.202911       0.162847       0.305289       0.180000   -9999.000000       0.116500       0.491000
57827     57827     guizhou        107.5139       26.3228          135       150     2012      10        31        305              0.342583      13.894470       0.071683       0.292215       0.161000       0.300800       0.114800   -9999.000000
57827     57827     guizhou        107.5139       26.3228          135       150     2012      11        01        306              0.334000      15.073273       0.119019       0.282608   -9999.000000   -9999.000000   -9999.000000       0.278000
57827     57827     guizhou        107.5139       26.3228          135       150     2012      11        02        307              0.327417      14.974701       0.505778       0.278725   -9999.000000       0.111500   -9999.000000   -9999.000000
57827     57827     guizhou        107.5139       26.3228          135       150     2012      11        03        308              0.316125      16.015564       0.206169       0.275219       0.159000       0.179200       0.120600       0.345000
57827     57827     guizhou        107.5139       26.3228          135       150     2012      11        04        309              0.308000      15.798950       0.081384       0.275040       0.144500   -9999.000000       0.113500       0.495000
57827     57827     guizhou        107.5139       26.3228          135       150     2012      11        05        310              0.310292      16.355865       7.644892       0.272294       0.151000       0.275600       0.093700   -9999.000000
57827     57827     guizhou        107.5139       26.3228          135       150     2012      11        06        311              0.359500      13.146576       6.345417       0.283867   -9999.000000   -9999.000000   -9999.000000       0.535000
57827     57827     guizhou        107.5139       26.3228          135       150     2012      11        07        312              0.368708      11.887726       7.019177       0.299663   -9999.000000       0.111900   -9999.000000   -9999.000000
57827     57827     guizhou        107.5139       26.3228          135       150     2012      11        08        313              0.358625      11.406403       0.889984       0.304265       0.185000       0.234700   -9999.000000       0.608000
57827     57827     guizhou        107.5139       26.3228          135       150     2012      11        09        314              0.365708      11.754120       1.445798       0.293622       0.178000   -9999.000000       0.085600       0.624000
57827     57827     guizhou        107.5139       26.3228          135       150     2012      11        10        315              0.353167      11.923370       0.000000       0.290649       0.158500       0.297300       0.092500       0.277000
57827     57827     guizhou        107.5139       26.3228          135       150     2012      11        11        316              0.343917      12.835632       0.000000       0.284585       0.120000   -9999.000000       0.084600       0.390000
57827     57827     guizhou        107.5139       26.3228          135       150     2012      11        12        317              0.338792      12.417267       0.000000       0.280659   -9999.000000       0.150700   -9999.000000   -9999.000000
57827     57827     guizhou        107.5139       26.3228          135       150     2012      11        13        318              0.000000      11.703827       0.076943       0.280142   -9999.000000       0.224600   -9999.000000       0.492000
57827     57827     guizhou        107.5139       26.3228          135       150     2012      11        14        319              0.336292      12.602478       0.655197       0.279573       0.139000   -9999.000000   -9999.000000   -9999.000000
57827     57827     guizhou        107.5139       26.3228          135       150     2012      11        15        320              0.349500      13.839355      12.650223       0.279909       0.128500       0.279100       0.115500       0.463000
57827     57827     guizhou        107.5139       26.3228          135       150     2012      11        16        321              0.369500      14.712189       7.431504       0.295959       0.121000       0.305500       0.116500       0.749000
57827     57827     guizhou        107.5139       26.3228          135       150     2012      11        17        322              0.000000      10.632599       0.000000       0.308497   -9999.000000   -9999.000000       0.107100   -9999.000000
57827     57827     guizhou        107.5139       26.3228          135       150     2012      11        18        323              0.344667      12.165131       0.000000       0.290097   -9999.000000       0.253100   -9999.000000       0.437000
57827     57827     guizhou        107.5139       26.3228          135       150     2012      11        19        324              0.345042      13.613190       0.723335       0.284089       0.146000   -9999.000000   -9999.000000   -9999.000000
57827     57827     guizhou        107.5139       26.3228          135       150     2012      11        20        325              0.363083      11.967224       0.533048       0.284893       0.136000       0.321000       0.063300       0.548000
57827     57827     guizhou        107.5139       26.3228          135       150     2012      11        21        326              0.360042      12.469208       1.940709       0.285548       0.103500       0.111500       0.068000       0.557000
57827     57827     guizhou        107.5139       26.3228          135       150     2012      11        22        327              0.355250      12.074585       0.000000       0.283360       0.103000   -9999.000000       0.062500   -9999.000000
57827     57827     guizhou        107.5139       26.3228          135       150     2012      11        23        328              0.348750      10.300598       0.207372       0.282009   -9999.000000       0.167900   -9999.000000       0.268000
57827     57827     guizhou        107.5139       26.3228          135       150     2012      11        24        329              0.349625       8.253235       0.133935       0.280935       0.116000   -9999.000000   -9999.000000   -9999.000000
57827     57827     guizhou        107.5139       26.3228          135       150     2012      11        25        330              0.348250      10.423157       0.160306       0.282248       0.110000       0.178200   -9999.000000       0.287000
57827     57827     guizhou        107.5139       26.3228          135       150     2012      11        26        331              0.345833       9.907532       0.162675       0.280834       0.109500       0.280100   -9999.000000       0.447000
57827     57827     guizhou        107.5139       26.3228          135       150     2012      11        27        332              0.343375       7.594269       0.269429       0.279562       0.110000   -9999.000000       0.066900       0.334000
57827     57827     guizhou        107.5139       26.3228          135       150     2012      11        28        333              0.342000       8.019012       0.264094       0.279669   -9999.000000       0.317300       0.057000       0.467000
57827     57827     guizhou        107.5139       26.3228          135       150     2012      11        29        334              0.350333       8.539795       1.251740       0.279616   -9999.000000   -9999.000000   -9999.000000   -9999.000000
57827     57827     guizhou        107.5139       26.3228          135       150     2012      11        30        335              0.365500       8.260956       2.073467       0.282711       0.127000       0.226100   -9999.000000       0.419000
57827     57827     guizhou        107.5139       26.3228          135       150     2012      12        01        336              0.364333       6.983917       0.165388       0.285182       0.146000       0.255200       0.068600   -9999.000000
57827     57827     guizhou        107.5139       26.3228          135       150     2012      12        02        337              0.356625       6.668610       0.000000       0.282826       0.113000   -9999.000000       0.060300       0.362000
57827     57827     guizhou        107.5139       26.3228          135       150     2012      12        03        338              0.349042       9.854797       0.000000       0.279106   -9999.000000       0.252200       0.080500       0.393000
57827     57827     guizhou        107.5139       26.3228          135       150     2012      12        04        339              0.345125       8.243866       0.000000       0.277846   -9999.000000   -9999.000000       0.074100   -9999.000000
57827     57827     guizhou        107.5139       26.3228          135       150     2012      12        05        340              0.338250       7.896454       0.000000       0.277011   -9999.000000       0.295500   -9999.000000       0.187000
57827     57827     guizhou        107.5139       26.3228          135       150     2012      12        06        341              0.332208       8.941498       0.084215       0.274051       0.133000       0.329200   -9999.000000   -9999.000000
57827     57827     guizhou        107.5139       26.3228          135       150     2012      12        07        342              0.328875       9.743958       0.000000       0.273071       0.136000   -9999.000000       0.075600       0.341000
57827     57827     guizhou        107.5139       26.3228          135       150     2012      12        08        343              0.325000       8.200958       1.120761       0.274050       0.136000       0.151100       0.086200       0.266000
57827     57827     guizhou        107.5139       26.3228          135       150     2012      12        09        344              0.341750       8.494629       3.208815       0.275528   -9999.000000       0.206900       0.081000       0.321000
57827     57827     guizhou        107.5139       26.3228          135       150     2012      12        10        345              0.369000       6.887512       2.393389       0.283936   -9999.000000   -9999.000000   -9999.000000       0.509000
57827     57827     guizhou        107.5139       26.3228          135       150     2012      12        11        346              0.361833       5.423859       0.159716       0.286879       0.134000       0.288300   -9999.000000   -9999.000000
57827     57827     guizhou        107.5139       26.3228          135       150     2012      12        12        347              0.359875       5.762268       0.488877       0.280927       0.133500   -9999.000000   -9999.000000       0.643000
57827     57827     guizhou        107.5139       26.3228          135       150     2012      12        13        348              0.355375       7.548523       0.000000       0.280551       0.115500       0.175600       0.090300   -9999.000000
57827     57827     guizhou        107.5139       26.3228          135       150     2012      12        14        349              0.359042      14.034393       0.000000       0.277464   -9999.000000       0.167000       0.100800       0.276000
57827     57827     guizhou        107.5139       26.3228          135       150     2012      12        15        350              0.000000      15.043701       1.938479       0.272482   -9999.000000   -9999.000000       0.091600       0.378000
57827     57827     guizhou        107.5139       26.3228          135       150     2012      12        16        351              0.345042      12.226898       2.079159       0.275408       0.131500       0.299600   -9999.000000   -9999.000000
57827     57827     guizhou        107.5139       26.3228          135       150     2012      12        17        352              0.338792       9.663666       0.196188       0.280991       0.131500   -9999.000000   -9999.000000       0.308000
57827     57827     guizhou        107.5139       26.3228          135       150     2012      12        18        353              0.333250       6.199432       0.000000       0.278514       0.127500       0.355900       0.078400   -9999.000000
57827     57827     guizhou        107.5139       26.3228          135       150     2012      12        19        354              0.332083       4.451385       3.846229       0.276042       0.118000       0.210700       0.083000       0.211000
57827     57827     guizhou        107.5139       26.3228          135       150     2012      12        20        355              0.000000       4.235992       2.333312       0.281436   -9999.000000   -9999.000000       0.080900       0.423000
57827     57827     guizhou        107.5139       26.3228          135       150     2012      12        21        356              0.365875       3.374207       0.202202       0.290226   -9999.000000       0.259600   -9999.000000   -9999.000000
57827     57827     guizhou        107.5139       26.3228          135       150     2012      12        22        357              0.359833       3.557007       0.000000       0.282377       0.128500   -9999.000000   -9999.000000       0.225000
57827     57827     guizhou        107.5139       26.3228          135       150     2012      12        23        358              0.353500       2.628387       0.000000       0.274969       0.127000       0.307300   -9999.000000   -9999.000000
57827     57827     guizhou        107.5139       26.3228          135       150     2012      12        24        359              0.345667       3.853424       0.551367       0.271707       0.116000       0.221100       0.088300       0.202000
57827     57827     guizhou        107.5139       26.3228          135       150     2012      12        25        360              0.346833       6.877258       1.951978       0.273490   -9999.000000   -9999.000000       0.100200       0.202000
57827     57827     guizhou        107.5139       26.3228          135       150     2012      12        26        361              0.000000       4.076508       0.790339       0.278257   -9999.000000   -9999.000000       0.097400       0.256000
57827     57827     guizhou        107.5139       26.3228          135       150     2012      12        27        362              0.369143       2.085876       0.476512       0.276727       0.133000   -9999.000000   -9999.000000       0.290000
57827     57827     guizhou        107.5139       26.3228          135       150     2012      12        28        363              0.370000       2.793732       4.085588       0.278015       0.132000   -9999.000000   -9999.000000   -9999.000000
57827     57827     guizhou        107.5139       26.3228          135       150     2012      12        29        364              0.000000       5.692566       3.243625       0.285252   -9999.000000       0.275400   -9999.000000       0.040000
57827     57827     guizhou        107.5139       26.3228          135       150     2012      12        30        365              0.000000       1.738678       1.824501       0.273461   -9999.000000   -9999.000000       0.088100   -9999.000000
57827     57827     guizhou        107.5139       26.3228          135       150     2012      12        31        366              0.361067       2.074554       0.000000       0.268436   -9999.000000   -9999.000000       0.066100   -9999.000000
