# Supplementary material for: Research on Fusing Multisatellite Soil Moisture Data Based on Bayesian Model Averaging
Source: Hindawi journal article supplement (doi:10.1155/2018/9310838), 2018-06-25
Supplement: f1 [file 9310838.f1.zip › 2012_sm00-10cm_daily_ZDB_ZHY_57832_366days_allin.txt]

57832     57832     guizhou        108.6744       26.9583          132       155     2012      01        01        001              0.000000   -9999.000000       0.671886   -9999.000000       0.094000   -9999.000000   -9999.000000   -9999.000000
57832     57832     guizhou        108.6744       26.9583          132       155     2012      01        02        002              0.353522       3.959320       8.002799       0.279704       0.102000       0.010300   -9999.000000       0.187000
57832     57832     guizhou        108.6744       26.9583          132       155     2012      01        03        003              0.000000       3.564972       5.635968       0.294564   -9999.000000   -9999.000000   -9999.000000   -9999.000000
57832     57832     guizhou        108.6744       26.9583          132       155     2012      01        04        004              0.419609       1.748718       0.116865       0.295108       0.106000   -9999.000000       0.050000       0.026000
57832     57832     guizhou        108.6744       26.9583          132       155     2012      01        05        005              0.424522       1.711517       2.144525       0.273985   -9999.000000   -9999.000000       0.046600       0.076000
57832     57832     guizhou        108.6744       26.9583          132       155     2012      01        06        006              0.417583       0.831268       0.718218       0.244348       0.102000   -9999.000000       0.044900       0.042000
57832     57832     guizhou        108.6744       26.9583          132       155     2012      01        07        007              0.414792       1.304871       1.814452       0.254906       0.103000       0.053800   -9999.000000       0.196000
57832     57832     guizhou        108.6744       26.9583          132       155     2012      01        08        008              0.000000       1.657227       0.969396       0.265279   -9999.000000   -9999.000000   -9999.000000   -9999.000000
57832     57832     guizhou        108.6744       26.9583          132       155     2012      01        09        009              0.408000       3.659943       0.146471       0.278358   -9999.000000       0.075100   -9999.000000       0.148000
57832     57832     guizhou        108.6744       26.9583          132       155     2012      01        10        010              0.404783       3.162354       0.619595       0.279199       0.104000       0.103400       0.043900   -9999.000000
57832     57832     guizhou        108.6744       26.9583          132       155     2012      01        11        011              0.400455       3.139435       0.086472       0.277388       0.075000   -9999.000000       0.044400       0.047000
57832     57832     guizhou        108.6744       26.9583          132       155     2012      01        12        012              0.401000       2.162079       2.075730       0.275835       0.078500       0.196100       0.041300       0.120000
57832     57832     guizhou        108.6744       26.9583          132       155     2012      01        13        013              0.411000       1.848938       2.394505       0.274473   -9999.000000   -9999.000000   -9999.000000   -9999.000000
57832     57832     guizhou        108.6744       26.9583          132       155     2012      01        14        014              0.434375       2.018646      16.580229       0.279538   -9999.000000       0.141400   -9999.000000       0.383000
57832     57832     guizhou        108.6744       26.9583          132       155     2012      01        15        015              0.235083       2.392700       0.192217       0.293064   -9999.000000   -9999.000000       0.044100   -9999.000000
57832     57832     guizhou        108.6744       26.9583          132       155     2012      01        16        016              0.192273       1.854675       0.150250       0.299603       0.077000   -9999.000000       0.042500       0.341000
57832     57832     guizhou        108.6744       26.9583          132       155     2012      01        17        017              0.000000       2.034454      11.338859       0.293442       0.084000       0.049100       0.038100       0.302000
57832     57832     guizhou        108.6744       26.9583          132       155     2012      01        18        018              0.301870       1.892120       2.893345       0.299297       0.083000   -9999.000000   -9999.000000   -9999.000000
57832     57832     guizhou        108.6744       26.9583          132       155     2012      01        19        019              0.373318       1.906952       3.013864       0.300016   -9999.000000   -9999.000000   -9999.000000       0.453000
57832     57832     guizhou        108.6744       26.9583          132       155     2012      01        20        020              0.377783       1.895508       4.316187       0.294551       0.089000   -9999.000000   -9999.000000   -9999.000000
57832     57832     guizhou        108.6744       26.9583          132       155     2012      01        21        021              0.374958       1.473511       0.370746       0.289730   -9999.000000   -9999.000000       0.042000       0.452000
57832     57832     guizhou        108.6744       26.9583          132       155     2012      01        22        022              0.365958       1.127869       0.255489       0.270019   -9999.000000   -9999.000000       0.038900   -9999.000000
57832     57832     guizhou        108.6744       26.9583          132       155     2012      01        23        023              0.362000       0.709595       0.000000       0.228385   -9999.000000   -9999.000000       0.042300       0.203000
57832     57832     guizhou        108.6744       26.9583          132       155     2012      01        24        024              0.361917       0.416901       0.528973       0.198977   -9999.000000   -9999.000000   -9999.000000       0.319000
57832     57832     guizhou        108.6744       26.9583          132       155     2012      01        25        025              0.359609       0.451874       0.508343       0.197289   -9999.000000       0.094200   -9999.000000   -9999.000000
57832     57832     guizhou        108.6744       26.9583          132       155     2012      01        26        026              0.357000       2.013916       0.000000       0.249955       0.100500   -9999.000000       0.042400       0.181000
57832     57832     guizhou        108.6744       26.9583          132       155     2012      01        27        027              0.354391       1.731415       0.172271       0.262412       0.100500       0.129400       0.044900   -9999.000000
57832     57832     guizhou        108.6744       26.9583          132       155     2012      01        28        028              0.351667       2.256042       0.101919       0.273204       0.092000       0.053300       0.044900       0.250000
57832     57832     guizhou        108.6744       26.9583          132       155     2012      01        29        029              0.347750       4.182098       0.120008       0.280063   -9999.000000   -9999.000000       0.039300       0.280000
57832     57832     guizhou        108.6744       26.9583          132       155     2012      01        30        030              0.344167       3.808777       0.000000       0.281107   -9999.000000       0.006800   -9999.000000   -9999.000000
57832     57832     guizhou        108.6744       26.9583          132       155     2012      01        31        031              0.341478       4.193726       0.368122       0.278080       0.090500   -9999.000000   -9999.000000       0.247000
57832     57832     guizhou        108.6744       26.9583          132       155     2012      02        01        032              0.336083       7.325104       1.922231       0.278078       0.083000   -9999.000000       0.060500   -9999.000000
57832     57832     guizhou        108.6744       26.9583          132       155     2012      02        02        033              0.351391       5.737762       0.310431       0.282519       0.069000       0.172000       0.057200       0.190000
57832     57832     guizhou        108.6744       26.9583          132       155     2012      02        03        034              0.365000       2.610413       1.591372       0.278444   -9999.000000   -9999.000000       0.054600       0.163000
57832     57832     guizhou        108.6744       26.9583          132       155     2012      02        04        035              0.365000       2.797577       0.794931       0.280295   -9999.000000       0.313000   -9999.000000       0.193000
57832     57832     guizhou        108.6744       26.9583          132       155     2012      02        05        036              0.373313       4.117188       0.777833       0.282392       0.090000   -9999.000000   -9999.000000       0.322000
57832     57832     guizhou        108.6744       26.9583          132       155     2012      02        06        037              0.372000       4.088531       0.053165       0.283153       0.081500   -9999.000000   -9999.000000   -9999.000000
57832     57832     guizhou        108.6744       26.9583          132       155     2012      02        07        038              0.364917       4.375946       0.000000       0.281046       0.082000       0.417200       0.042700       0.253000
57832     57832     guizhou        108.6744       26.9583          132       155     2012      02        08        039              0.359250       5.829132       0.000000       0.276754   -9999.000000   -9999.000000       0.042700   -9999.000000
57832     57832     guizhou        108.6744       26.9583          132       155     2012      02        09        040              0.354652       1.973969       0.307548       0.262209   -9999.000000   -9999.000000       0.040600   -9999.000000
57832     57832     guizhou        108.6744       26.9583          132       155     2012      02        10        041              0.354409       0.936279       0.744104       0.237336       0.085000       0.064000   -9999.000000       0.132000
57832     57832     guizhou        108.6744       26.9583          132       155     2012      02        11        042              0.354000       1.820160       0.203927       0.255443       0.091000   -9999.000000   -9999.000000   -9999.000000
57832     57832     guizhou        108.6744       26.9583          132       155     2012      02        12        043              0.356000       3.066284       1.618507       0.269950       0.099000       0.103100   -9999.000000       0.366000
57832     57832     guizhou        108.6744       26.9583          132       155     2012      02        13        044              0.373625       2.331635       1.610119       0.272562   -9999.000000   -9999.000000       0.035500   -9999.000000
57832     57832     guizhou        108.6744       26.9583          132       155     2012      02        14        045              0.377364       2.797607       0.517631       0.279555   -9999.000000       0.087000       0.039100       0.328000
57832     57832     guizhou        108.6744       26.9583          132       155     2012      02        15        046              0.371125       3.095795       0.049723       0.279119   -9999.000000   -9999.000000       0.032400       0.326000
57832     57832     guizhou        108.6744       26.9583          132       155     2012      02        16        047              0.366333       2.777771       0.000000       0.275833       0.094000   -9999.000000   -9999.000000   -9999.000000
57832     57832     guizhou        108.6744       26.9583          132       155     2012      02        17        048              0.362429       4.337585       0.000000       0.274603       0.092000       0.282500   -9999.000000       0.139000
57832     57832     guizhou        108.6744       26.9583          132       155     2012      02        18        049              0.000000       3.652435       0.000000       0.273328   -9999.000000   -9999.000000       0.033200   -9999.000000
57832     57832     guizhou        108.6744       26.9583          132       155     2012      02        19        050              0.359400       2.307526       0.303752       0.266671   -9999.000000       0.071500       0.033100       0.162000
57832     57832     guizhou        108.6744       26.9583          132       155     2012      02        20        051              0.358043       5.345947       3.660097       0.270854   -9999.000000       0.137400       0.031600   -9999.000000
57832     57832     guizhou        108.6744       26.9583          132       155     2012      02        21        052              0.375870       4.834137       2.518516       0.279420       0.073000   -9999.000000   -9999.000000       0.412000
57832     57832     guizhou        108.6744       26.9583          132       155     2012      02        22        053              0.374111       5.544922       3.262652       0.285242       0.071000       0.232100   -9999.000000       0.455000
57832     57832     guizhou        108.6744       26.9583          132       155     2012      02        23        054              0.000000       6.960541       0.673156       0.284872       0.067500   -9999.000000   -9999.000000   -9999.000000
57832     57832     guizhou        108.6744       26.9583          132       155     2012      02        24        055              0.373647       6.817261       2.353480       0.283053       0.068000       0.288400       0.037700       0.309000
57832     57832     guizhou        108.6744       26.9583          132       155     2012      02        25        056              0.373913       5.543518       0.177859       0.281862   -9999.000000       0.060100       0.037000   -9999.000000
57832     57832     guizhou        108.6744       26.9583          132       155     2012      02        26        057              0.367957       3.328430       0.000000       0.279299   -9999.000000   -9999.000000       0.034700       0.031000
57832     57832     guizhou        108.6744       26.9583          132       155     2012      02        27        058              0.365000       2.090118       0.820313       0.266611   -9999.000000       0.023900   -9999.000000       0.085000
57832     57832     guizhou        108.6744       26.9583          132       155     2012      02        28        059              0.362375       2.262970       0.852356       0.264590       0.073500   -9999.000000   -9999.000000   -9999.000000
57832     57832     guizhou        108.6744       26.9583          132       155     2012      02        29        060              0.000000   -9999.000000       0.271253   -9999.000000       0.067000   -9999.000000   -9999.000000   -9999.000000
57832     57832     guizhou        108.6744       26.9583          132       155     2012      03        01        061              0.365000       2.817078       1.242194       0.271225   -9999.000000       0.163300       0.035900   -9999.000000
57832     57832     guizhou        108.6744       26.9583          132       155     2012      03        02        062              0.365958       4.807434       1.867914       0.276077       0.111000   -9999.000000       0.039100       0.339000
57832     57832     guizhou        108.6744       26.9583          132       155     2012      03        03        063              0.375542       4.696747      20.202820       0.279500       0.108000       0.084100       0.037000       0.323000
57832     57832     guizhou        108.6744       26.9583          132       155     2012      03        04        064              0.377583       4.422974       1.475029       0.299536       0.104000   -9999.000000   -9999.000000       0.505000
57832     57832     guizhou        108.6744       26.9583          132       155     2012      03        05        065              0.370500       3.250183       1.010701       0.303426       0.097500   -9999.000000   -9999.000000       0.437000
57832     57832     guizhou        108.6744       26.9583          132       155     2012      03        06        066              0.371348       5.880188       1.056935       0.291195   -9999.000000       0.046100       0.040000   -9999.000000
57832     57832     guizhou        108.6744       26.9583          132       155     2012      03        07        067              0.000000       4.707336       3.242766       0.287153   -9999.000000   -9999.000000       0.038400       0.600000
57832     57832     guizhou        108.6744       26.9583          132       155     2012      03        08        068              0.380833       4.152924       2.295350       0.287070       0.114500       0.134600       0.035700   -9999.000000
57832     57832     guizhou        108.6744       26.9583          132       155     2012      03        09        069              0.375435       3.832245       0.098120       0.290104       0.105500   -9999.000000   -9999.000000       0.351000
57832     57832     guizhou        108.6744       26.9583          132       155     2012      03        10        070              0.367136       3.787964       0.000000       0.285054       0.096500   -9999.000000   -9999.000000       0.365000
57832     57832     guizhou        108.6744       26.9583          132       155     2012      03        11        071              0.361750       7.185486       0.000000       0.280228   -9999.000000       0.207900   -9999.000000   -9999.000000
57832     57832     guizhou        108.6744       26.9583          132       155     2012      03        12        072              0.356625       8.457275       0.000000       0.277890   -9999.000000   -9999.000000       0.037400       0.369000
57832     57832     guizhou        108.6744       26.9583          132       155     2012      03        13        073              0.345957       8.676117       0.159815       0.276700       0.081000       0.334800       0.038200   -9999.000000
57832     57832     guizhou        108.6744       26.9583          132       155     2012      03        14        074              0.336750      12.702606       2.687810       0.273961       0.088000       0.224000   -9999.000000       0.376000
57832     57832     guizhou        108.6744       26.9583          132       155     2012      03        15        075              0.342208      10.530792       0.397877       0.278658       0.082000   -9999.000000   -9999.000000       0.466000
57832     57832     guizhou        108.6744       26.9583          132       155     2012      03        16        076              0.345000      10.182526       0.043425       0.281316       0.081000       0.236000   -9999.000000   -9999.000000
57832     57832     guizhou        108.6744       26.9583          132       155     2012      03        17        077              0.347000      11.012177       0.000000       0.278106   -9999.000000   -9999.000000       0.035600       0.427000
57832     57832     guizhou        108.6744       26.9583          132       155     2012      03        18        078              0.347000      12.364380       0.000000       0.275690       0.081000   -9999.000000       0.039500   -9999.000000
57832     57832     guizhou        108.6744       26.9583          132       155     2012      03        19        079              0.347000      13.535889       0.138663       0.274541       0.076500       0.042600       0.048700       0.361000
57832     57832     guizhou        108.6744       26.9583          132       155     2012      03        20        080              0.345667      13.693085       1.076830       0.273860       0.085000   -9999.000000   -9999.000000   -9999.000000
57832     57832     guizhou        108.6744       26.9583          132       155     2012      03        21        081              0.345000       9.714539       0.587142       0.274652       0.076000       0.101000   -9999.000000       0.367000
57832     57832     guizhou        108.6744       26.9583          132       155     2012      03        22        082              0.359652       8.278595      18.649900       0.274275   -9999.000000   -9999.000000   -9999.000000       0.395000
57832     57832     guizhou        108.6744       26.9583          132       155     2012      03        23        083              0.370043       7.904480       0.000000       0.300361   -9999.000000   -9999.000000       0.044900   -9999.000000
57832     57832     guizhou        108.6744       26.9583          132       155     2012      03        24        084              0.362542       9.584137       0.000000       0.293817       0.070000       0.141600       0.041200       0.446000
57832     57832     guizhou        108.6744       26.9583          132       155     2012      03        25        085              0.000000      14.585815       0.000000       0.279957       0.065500   -9999.000000       0.038200   -9999.000000
57832     57832     guizhou        108.6744       26.9583          132       155     2012      03        26        086              0.328125      16.420868       0.000000       0.273509       0.067000       0.087000   -9999.000000   -9999.000000
57832     57832     guizhou        108.6744       26.9583          132       155     2012      03        27        087              0.313870      15.555450       2.134429       0.271749   -9999.000000       0.303700   -9999.000000       0.437000
57832     57832     guizhou        108.6744       26.9583          132       155     2012      03        28        088              0.381917      16.289246      30.661406       0.274146   -9999.000000   -9999.000000   -9999.000000   -9999.000000
57832     57832     guizhou        108.6744       26.9583          132       155     2012      03        29        089              0.385292      13.991913       8.301857       0.325240       0.087500       0.205300       0.065600       0.623000
57832     57832     guizhou        108.6744       26.9583          132       155     2012      03        30        090              0.378833      14.337860       1.040974       0.306549       0.076000   -9999.000000       0.058800   -9999.000000
57832     57832     guizhou        108.6744       26.9583          132       155     2012      03        31        091              0.365708      13.929230       0.000000       0.296504       0.062500       0.143000       0.055300       0.462000
57832     57832     guizhou        108.6744       26.9583          132       155     2012      04        01        092              0.346875      16.435974       0.000000       0.283142   -9999.000000       0.195700   -9999.000000       0.606000
57832     57832     guizhou        108.6744       26.9583          132       155     2012      04        02        093              0.314833      19.173004       0.072382       0.277331   -9999.000000   -9999.000000   -9999.000000       0.526000
57832     57832     guizhou        108.6744       26.9583          132       155     2012      04        03        094              0.304565      22.225708       0.000000       0.274253       0.088000       0.221800       0.056200       0.408000
57832     57832     guizhou        108.6744       26.9583          132       155     2012      04        04        095              0.291708      17.983917       0.245607       0.273636       0.087500       0.038300       0.057000   -9999.000000
57832     57832     guizhou        108.6744       26.9583          132       155     2012      04        05        096              0.281333      16.773895       0.370189       0.273578       0.083500   -9999.000000       0.054700       0.398000
57832     57832     guizhou        108.6744       26.9583          132       155     2012      04        06        097              0.281250      16.432678       1.153116       0.274313       0.078000       0.079100   -9999.000000   -9999.000000
57832     57832     guizhou        108.6744       26.9583          132       155     2012      04        07        098              0.284208      16.327850       1.378192       0.275249   -9999.000000   -9999.000000   -9999.000000       0.332000
57832     57832     guizhou        108.6744       26.9583          132       155     2012      04        08        099              0.283917      14.740784       7.224016       0.281048       0.092000       0.062700   -9999.000000       0.322000
57832     57832     guizhou        108.6744       26.9583          132       155     2012      04        09        100              0.301500      16.462006       1.107353       0.284821       0.096000       0.102000       0.056100   -9999.000000
57832     57832     guizhou        108.6744       26.9583          132       155     2012      04        10        101              0.298333      15.583679       0.326669       0.290978       0.086000   -9999.000000       0.054500       0.520000
57832     57832     guizhou        108.6744       26.9583          132       155     2012      04        11        102              0.292043      20.171234       1.044737       0.279737       0.084000       0.029800       0.048700   -9999.000000
57832     57832     guizhou        108.6744       26.9583          132       155     2012      04        12        103              0.328750      18.363678      11.125929       0.276887   -9999.000000   -9999.000000   -9999.000000       0.593000
57832     57832     guizhou        108.6744       26.9583          132       155     2012      04        13        104              0.357478      17.862244       0.206445       0.297767   -9999.000000       0.129600   -9999.000000       0.435000
57832     57832     guizhou        108.6744       26.9583          132       155     2012      04        14        105              0.348958      15.783600       0.116206       0.285286       0.108000       0.016800   -9999.000000   -9999.000000
57832     57832     guizhou        108.6744       26.9583          132       155     2012      04        15        106              0.342833      15.631927       0.434879       0.279716       0.099000   -9999.000000       0.053600       0.436000
57832     57832     guizhou        108.6744       26.9583          132       155     2012      04        16        107              0.320375      16.459930       0.000000       0.276893       0.088500       0.149300       0.080900   -9999.000000
57832     57832     guizhou        108.6744       26.9583          132       155     2012      04        17        108              0.306250      19.356873       0.461318       0.271043   -9999.000000   -9999.000000       0.076800       0.310000
57832     57832     guizhou        108.6744       26.9583          132       155     2012      04        18        109              0.301833      16.639191       0.000000       0.271950   -9999.000000       0.044500   -9999.000000   -9999.000000
57832     57832     guizhou        108.6744       26.9583          132       155     2012      04        19        110              0.306167      19.419952      16.161598       0.269100       0.077000       0.224500   -9999.000000       0.392000
57832     57832     guizhou        108.6744       26.9583          132       155     2012      04        20        111              0.370875      21.036835       0.000000       0.283758       0.094500   -9999.000000       0.082500       0.722000
57832     57832     guizhou        108.6744       26.9583          132       155     2012      04        21        112              0.352292      19.057465       0.000000       0.294215       0.106500       0.174500       0.081500   -9999.000000
57832     57832     guizhou        108.6744       26.9583          132       155     2012      04        22        113              0.317250      21.292084       0.834180       0.276183       0.103000   -9999.000000   -9999.000000       0.495000
57832     57832     guizhou        108.6744       26.9583          132       155     2012      04        23        114              0.287696      23.078796       0.000000       0.267824   -9999.000000   -9999.000000   -9999.000000   -9999.000000
57832     57832     guizhou        108.6744       26.9583          132       155     2012      04        24        115              0.294833      23.364716       1.960327       0.265535       0.128000       0.200100   -9999.000000       0.480000
57832     57832     guizhou        108.6744       26.9583          132       155     2012      04        25        116              0.000000      24.502991       1.493115       0.265477       0.132000   -9999.000000   -9999.000000       0.754000
57832     57832     guizhou        108.6744       26.9583          132       155     2012      04        26        117              0.350083      17.429657       4.010254       0.273471       0.122000       0.143200       0.120200   -9999.000000
57832     57832     guizhou        108.6744       26.9583          132       155     2012      04        27        118              0.342167      20.982910      15.443436       0.270192       0.117000       0.231000       0.111900       0.457000
57832     57832     guizhou        108.6744       26.9583          132       155     2012      04        28        119              0.360522      23.067108       3.246704       0.291338   -9999.000000   -9999.000000       0.112700   -9999.000000
57832     57832     guizhou        108.6744       26.9583          132       155     2012      04        29        120              0.376667      21.908081      35.045776       0.297193   -9999.000000       0.102800   -9999.000000       0.685000
57832     57832     guizhou        108.6744       26.9583          132       155     2012      04        30        121              0.382417      21.057892       1.530396       0.309392       0.158000   -9999.000000   -9999.000000       0.730000
57832     57832     guizhou        108.6744       26.9583          132       155     2012      05        01        122              0.379625      20.829254       1.323627       0.309746       0.213500       0.163200       0.099500       0.579000
57832     57832     guizhou        108.6744       26.9583          132       155     2012      05        02        123              0.385167      19.516418       4.407626       0.291830       0.212000       0.125400       0.108100       0.587000
57832     57832     guizhou        108.6744       26.9583          132       155     2012      05        03        124              0.382417      19.132965       4.527252       0.292119   -9999.000000   -9999.000000       0.101800   -9999.000000
57832     57832     guizhou        108.6744       26.9583          132       155     2012      05        04        125              0.389542      18.782684       5.276112       0.295240   -9999.000000       0.238800       0.099400       0.836000
57832     57832     guizhou        108.6744       26.9583          132       155     2012      05        05        126              0.377130      19.033051       0.000000       0.301724       0.205500   -9999.000000   -9999.000000   -9999.000000
57832     57832     guizhou        108.6744       26.9583          132       155     2012      05        06        127              0.366875      21.415833       0.000000       0.287018       0.182500       0.144500   -9999.000000       0.516000
57832     57832     guizhou        108.6744       26.9583          132       155     2012      05        07        128              0.340917      24.004669       0.000000       0.281979   -9999.000000       0.189700       0.085900       0.589000
57832     57832     guizhou        108.6744       26.9583          132       155     2012      05        08        129              0.308565      25.390137       0.535961       0.277360   -9999.000000   -9999.000000       0.086500   -9999.000000
57832     57832     guizhou        108.6744       26.9583          132       155     2012      05        09        130              0.377708      26.523926      36.382847       0.275231   -9999.000000       0.268200       0.091700       0.901000
57832     57832     guizhou        108.6744       26.9583          132       155     2012      05        10        131              0.377696      23.327789       0.000000       0.326660       0.199000   -9999.000000   -9999.000000   -9999.000000
57832     57832     guizhou        108.6744       26.9583          132       155     2012      05        11        132              0.387750      22.837952       3.212754       0.295461       0.163500   -9999.000000   -9999.000000       0.641000
57832     57832     guizhou        108.6744       26.9583          132       155     2012      05        12        133              0.398542      23.151947      32.060871       0.297746       0.184500       0.090900   -9999.000000       0.944000
57832     57832     guizhou        108.6744       26.9583          132       155     2012      05        13        134              0.395042      22.014954      41.788280       0.330527       0.185000   -9999.000000       0.103200   -9999.000000
57832     57832     guizhou        108.6744       26.9583          132       155     2012      05        14        135              0.398583      19.556519       1.051901       0.320348   -9999.000000       0.151700       0.137000       0.629000
57832     57832     guizhou        108.6744       26.9583          132       155     2012      05        15        136              0.384208      18.629303       0.093014       0.325658       0.175000       0.229900       0.122900   -9999.000000
57832     57832     guizhou        108.6744       26.9583          132       155     2012      05        16        137              0.359750      19.946777       0.000000       0.312156       0.159000   -9999.000000   -9999.000000       0.447000
57832     57832     guizhou        108.6744       26.9583          132       155     2012      05        17        138              0.326667      21.527771       2.573250       0.302553       0.162000       0.056600   -9999.000000   -9999.000000
57832     57832     guizhou        108.6744       26.9583          132       155     2012      05        18        139              0.301042      22.375305       0.544645       0.297605       0.142000   -9999.000000       0.131200       0.515000
57832     57832     guizhou        108.6744       26.9583          132       155     2012      05        19        140              0.285833      25.000916       0.000000       0.292330   -9999.000000       0.087600       0.129900       0.504000
57832     57832     guizhou        108.6744       26.9583          132       155     2012      05        20        141              0.273458      25.561066       0.000000       0.287009   -9999.000000       0.138400       0.132500   -9999.000000
57832     57832     guizhou        108.6744       26.9583          132       155     2012      05        21        142              0.274375      24.877594       5.758650       0.281288       0.230500   -9999.000000       0.075200       0.715000
57832     57832     guizhou        108.6744       26.9583          132       155     2012      05        22        143              0.371208      21.410858      16.803255       0.290973       0.241500       0.190400   -9999.000000   -9999.000000
57832     57832     guizhou        108.6744       26.9583          132       155     2012      05        23        144              0.394167      20.368011       8.659741       0.315205   -9999.000000   -9999.000000   -9999.000000       0.789000
57832     57832     guizhou        108.6744       26.9583          132       155     2012      05        24        145              0.407391      19.467987      30.629892       0.307642   -9999.000000       0.187000       0.086500       0.806000
57832     57832     guizhou        108.6744       26.9583          132       155     2012      05        25        146              0.000000      18.375336      13.689555       0.328082   -9999.000000       0.427500       0.079700   -9999.000000
57832     57832     guizhou        108.6744       26.9583          132       155     2012      05        26        147              0.393708      18.345520       0.242886       0.322461       0.207000   -9999.000000       0.077000       0.562000
57832     57832     guizhou        108.6744       26.9583          132       155     2012      05        27        148              0.382458      21.094330       0.172899       0.306917       0.191500       0.084100   -9999.000000   -9999.000000
57832     57832     guizhou        108.6744       26.9583          132       155     2012      05        28        149              0.323458      22.130890       0.216044       0.301241       0.161000   -9999.000000   -9999.000000       0.551000
57832     57832     guizhou        108.6744       26.9583          132       155     2012      05        29        150              0.197292      22.993439      10.469746       0.297757   -9999.000000   -9999.000000   -9999.000000       0.540000
57832     57832     guizhou        108.6744       26.9583          132       155     2012      05        30        151              0.286833      22.413666       0.000000       0.310210   -9999.000000   -9999.000000       0.080500   -9999.000000
57832     57832     guizhou        108.6744       26.9583          132       155     2012      05        31        152              0.377500      22.432251       4.716155       0.295038       0.224000   -9999.000000       0.083400   -9999.000000
57832     57832     guizhou        108.6744       26.9583          132       155     2012      06        01        153              0.390667      20.326355       8.767424       0.300093       0.216000       0.225700       0.081000   -9999.000000
57832     57832     guizhou        108.6744       26.9583          132       155     2012      06        02        154              0.382250      19.322754       1.548268       0.307650       0.225000       0.106100   -9999.000000       0.783000
57832     57832     guizhou        108.6744       26.9583          132       155     2012      06        03        155              0.392958      20.751007      16.608377       0.296165       0.259000   -9999.000000   -9999.000000   -9999.000000
57832     57832     guizhou        108.6744       26.9583          132       155     2012      06        04        156              0.393917      19.638397       2.917222       0.316314   -9999.000000       0.227800       0.052300       0.679000
57832     57832     guizhou        108.6744       26.9583          132       155     2012      06        05        157              0.385083      20.031830       0.302129       0.305361       0.234000   -9999.000000       0.057900       0.592000
57832     57832     guizhou        108.6744       26.9583          132       155     2012      06        06        158              0.383250      21.027740       0.180630       0.296844       0.230500       0.334500       0.056700   -9999.000000
57832     57832     guizhou        108.6744       26.9583          132       155     2012      06        07        159              0.390167      22.230560      10.746535       0.294733       0.218000       0.105300       0.054200       0.726000
57832     57832     guizhou        108.6744       26.9583          132       155     2012      06        08        160              0.382417      22.499847       0.440268       0.308355       0.212000   -9999.000000   -9999.000000   -9999.000000
57832     57832     guizhou        108.6744       26.9583          132       155     2012      06        09        161              0.392125      24.831635      28.123623       0.292899   -9999.000000       0.118900   -9999.000000       0.780000
57832     57832     guizhou        108.6744       26.9583          132       155     2012      06        10        162              0.392609      26.740967       4.586786       0.317593   -9999.000000   -9999.000000       0.056300       0.744000
57832     57832     guizhou        108.6744       26.9583          132       155     2012      06        11        163              0.000000      25.354095       4.581420       0.310635       0.179000       0.182500       0.060100   -9999.000000
57832     57832     guizhou        108.6744       26.9583          132       155     2012      06        12        164              0.384833      23.348602       0.000000       0.306872       0.157000       0.222000       0.060300       0.559000
57832     57832     guizhou        108.6744       26.9583          132       155     2012      06        13        165              0.379292      24.513702       2.172783       0.297670       0.148000   -9999.000000   -9999.000000   -9999.000000
57832     57832     guizhou        108.6744       26.9583          132       155     2012      06        14        166              0.373375      25.774078       0.361306       0.292079   -9999.000000       0.125300   -9999.000000       0.553000
57832     57832     guizhou        108.6744       26.9583          132       155     2012      06        15        167              0.357333      23.188690       0.000000       0.290887   -9999.000000   -9999.000000   -9999.000000   -9999.000000
57832     57832     guizhou        108.6744       26.9583          132       155     2012      06        16        168              0.322250      25.127167       0.000000       0.284629       0.143500   -9999.000000       0.059700       0.473000
57832     57832     guizhou        108.6744       26.9583          132       155     2012      06        17        169              0.293708      24.952820       0.000000       0.279956       0.134000   -9999.000000       0.058400       0.549000
57832     57832     guizhou        108.6744       26.9583          132       155     2012      06        18        170              0.269875      25.762329       0.000000       0.277801       0.125500   -9999.000000       0.079900   -9999.000000
57832     57832     guizhou        108.6744       26.9583          132       155     2012      06        19        171              0.262143      25.706085       0.140457       0.275696       0.129000       0.142500   -9999.000000       0.480000
57832     57832     guizhou        108.6744       26.9583          132       155     2012      06        20        172              0.253250      24.532166       0.000000       0.276632   -9999.000000       0.114500   -9999.000000   -9999.000000
57832     57832     guizhou        108.6744       26.9583          132       155     2012      06        21        173              0.249792      26.251892       2.006850       0.272964       0.185000   -9999.000000       0.079900       0.542000
57832     57832     guizhou        108.6744       26.9583          132       155     2012      06        22        174              0.284435      25.561584       8.818275       0.275740       0.193000       0.155400       0.086700       0.714000
57832     57832     guizhou        108.6744       26.9583          132       155     2012      06        23        175              0.287478      23.505463       0.734061       0.297865       0.177500   -9999.000000       0.077500   -9999.000000
57832     57832     guizhou        108.6744       26.9583          132       155     2012      06        24        176              0.265458      26.094086       0.099756       0.282447       0.166000       0.161300   -9999.000000       0.481000
57832     57832     guizhou        108.6744       26.9583          132       155     2012      06        25        177              0.272250      27.455048      36.486542       0.274466   -9999.000000       0.253800   -9999.000000   -9999.000000
57832     57832     guizhou        108.6744       26.9583          132       155     2012      06        26        178              0.362750      25.770508      25.709877       0.319627       0.203000   -9999.000000   -9999.000000       0.999000
57832     57832     guizhou        108.6744       26.9583          132       155     2012      06        27        179              0.356458      25.103424       1.497634       0.327475       0.182000   -9999.000000       0.109800       0.786000
57832     57832     guizhou        108.6744       26.9583          132       155     2012      06        28        180              0.349750      26.251190       4.342501       0.298599       0.187000   -9999.000000       0.106900       0.634000
57832     57832     guizhou        108.6744       26.9583          132       155     2012      06        29        181              0.329609      26.596222       0.677799       0.297399       0.165000       0.149500       0.103400       0.708000
57832     57832     guizhou        108.6744       26.9583          132       155     2012      06        30        182              0.290292      27.887177       1.363193       0.291556   -9999.000000       0.130900   -9999.000000   -9999.000000
57832     57832     guizhou        108.6744       26.9583          132       155     2012      07        01        183              0.267000      29.185150       1.856485       0.285269   -9999.000000   -9999.000000   -9999.000000       0.714000
57832     57832     guizhou        108.6744       26.9583          132       155     2012      07        02        184              0.255000      27.967285       0.000000       0.281208       0.196000       0.260300   -9999.000000   -9999.000000
57832     57832     guizhou        108.6744       26.9583          132       155     2012      07        03        185              0.246208      27.578217       0.000000       0.276910       0.193500   -9999.000000       0.146100       0.519000
57832     57832     guizhou        108.6744       26.9583          132       155     2012      07        04        186              0.240391      27.445404       0.000000       0.275427       0.191000   -9999.000000       0.144900       0.566000
57832     57832     guizhou        108.6744       26.9583          132       155     2012      07        05        187              0.234708      27.368744       0.000000       0.273235   -9999.000000       0.118100       0.137100   -9999.000000
57832     57832     guizhou        108.6744       26.9583          132       155     2012      07        06        188              0.229292      28.083313       0.000000       0.270477   -9999.000000   -9999.000000   -9999.000000       0.689000
57832     57832     guizhou        108.6744       26.9583          132       155     2012      07        07        189              0.227125      28.677917       0.000000       0.267480   -9999.000000       0.093100   -9999.000000   -9999.000000
57832     57832     guizhou        108.6744       26.9583          132       155     2012      07        08        190              0.225500      28.616302       0.000000       0.265221       0.184000       0.055100       0.136600       0.478000
57832     57832     guizhou        108.6744       26.9583          132       155     2012      07        09        191              0.223208      27.702179       0.000000       0.263436       0.180000   -9999.000000       0.095100       0.417000
57832     57832     guizhou        108.6744       26.9583          132       155     2012      07        10        192              0.221583      27.773041       0.000000       0.261058       0.168000       0.224300       0.091700       0.498000
57832     57832     guizhou        108.6744       26.9583          132       155     2012      07        11        193              0.219542      28.533752       0.245228       0.258766   -9999.000000   -9999.000000   -9999.000000       0.537000
57832     57832     guizhou        108.6744       26.9583          132       155     2012      07        12        194              0.224875      29.308380      20.407394       0.256269   -9999.000000       0.172100   -9999.000000   -9999.000000
57832     57832     guizhou        108.6744       26.9583          132       155     2012      07        13        195              0.319875      28.550323      13.269730       0.272640       0.230000       0.158300   -9999.000000       0.705000
57832     57832     guizhou        108.6744       26.9583          132       155     2012      07        14        196              0.309333      26.219177       5.395346       0.313895       0.201000   -9999.000000       0.095200   -9999.000000
57832     57832     guizhou        108.6744       26.9583          132       155     2012      07        15        197              0.333667      28.549255      17.954582       0.289878       0.257000       0.158900       0.100500       0.789000
57832     57832     guizhou        108.6744       26.9583          132       155     2012      07        16        198              0.337292      26.009125      19.978296       0.314645   -9999.000000   -9999.000000       0.080400       0.926000
57832     57832     guizhou        108.6744       26.9583          132       155     2012      07        17        199              0.342500      26.163788      19.387541       0.317639   -9999.000000       0.197000   -9999.000000   -9999.000000
57832     57832     guizhou        108.6744       26.9583          132       155     2012      07        18        200              0.336792      25.297180      23.266371       0.319579       0.243000   -9999.000000   -9999.000000       0.974000
57832     57832     guizhou        108.6744       26.9583          132       155     2012      07        19        201              0.325708      26.486816       0.328351       0.319804       0.227500   -9999.000000       0.080300   -9999.000000
57832     57832     guizhou        108.6744       26.9583          132       155     2012      07        20        202              0.291667      27.918091       0.000000       0.299208       0.181000       0.248500       0.079600       0.590000
57832     57832     guizhou        108.6744       26.9583          132       155     2012      07        21        203              0.257609      29.056976       0.000000       0.289247       0.293000   -9999.000000       0.081100       0.636000
57832     57832     guizhou        108.6744       26.9583          132       155     2012      07        22        204              0.239667      29.310699       0.949981       0.284013   -9999.000000       0.150800       0.069300   -9999.000000
57832     57832     guizhou        108.6744       26.9583          132       155     2012      07        23        205              0.297261      29.550018      42.272476       0.280966       0.367000       0.146800   -9999.000000       0.733000
57832     57832     guizhou        108.6744       26.9583          132       155     2012      07        24        206              0.334750      27.230377       8.679503       0.328825       0.357000   -9999.000000   -9999.000000   -9999.000000
57832     57832     guizhou        108.6744       26.9583          132       155     2012      07        25        207              0.332333      26.843292      19.879198       0.315842       0.352500       0.265700       0.179500       0.885000
57832     57832     guizhou        108.6744       26.9583          132       155     2012      07        26        208              0.327958      26.910614       2.401139       0.323077       0.314000       0.088900       0.181100   -9999.000000
57832     57832     guizhou        108.6744       26.9583          132       155     2012      07        27        209              0.340917      27.805908       5.808607       0.307932   -9999.000000   -9999.000000       0.169400       0.705000
57832     57832     guizhou        108.6744       26.9583          132       155     2012      07        28        210              0.338542      27.024231       3.744943       0.308474   -9999.000000       0.091500   -9999.000000       0.571000
57832     57832     guizhou        108.6744       26.9583          132       155     2012      07        29        211              0.332333      27.593933       0.190635       0.302869       0.348500   -9999.000000   -9999.000000   -9999.000000
57832     57832     guizhou        108.6744       26.9583          132       155     2012      07        30        212              0.305458      28.356903       0.437638       0.294600       0.334500       0.235900   -9999.000000       0.617000
57832     57832     guizhou        108.6744       26.9583          132       155     2012      07        31        213              0.305583      28.831421       6.277609       0.287833       0.320000       0.317700       0.154000   -9999.000000
57832     57832     guizhou        108.6744       26.9583          132       155     2012      08        01        214              0.329208      28.787201       6.085683       0.292541   -9999.000000   -9999.000000       0.153300       0.673000
57832     57832     guizhou        108.6744       26.9583          132       155     2012      08        02        215              0.315458      27.645111       0.000000       0.298119   -9999.000000       0.218400       0.145700       0.594000
57832     57832     guizhou        108.6744       26.9583          132       155     2012      08        03        216              0.282458      28.065857       0.000000       0.283407       0.320000   -9999.000000   -9999.000000   -9999.000000
57832     57832     guizhou        108.6744       26.9583          132       155     2012      08        04        217              0.277208      27.696899       5.213350       0.277394       0.314000       0.218900   -9999.000000       0.581000
57832     57832     guizhou        108.6744       26.9583          132       155     2012      08        05        218              0.341583      28.562897      13.064097       0.282862       0.396000       0.218700       0.159800   -9999.000000
57832     57832     guizhou        108.6744       26.9583          132       155     2012      08        06        219              0.341958      26.349426       5.919046       0.307339       0.356000   -9999.000000       0.177300       0.629000
57832     57832     guizhou        108.6744       26.9583          132       155     2012      08        07        220              0.339875      25.002533       4.871273       0.301080   -9999.000000       0.171400       0.158200       0.684000
57832     57832     guizhou        108.6744       26.9583          132       155     2012      08        08        221              0.325458      26.578461       0.000000       0.297521       0.341000   -9999.000000       0.162200   -9999.000000
57832     57832     guizhou        108.6744       26.9583          132       155     2012      08        09        222              0.293375      27.891144       0.000000       0.283163       0.310500       0.155600   -9999.000000       0.515000
57832     57832     guizhou        108.6744       26.9583          132       155     2012      08        10        223              0.261833      28.460541       0.000000       0.276913       0.299000       0.178700   -9999.000000   -9999.000000
57832     57832     guizhou        108.6744       26.9583          132       155     2012      08        11        224              0.243500      28.421051       0.000000       0.272989       0.239000   -9999.000000       0.166600       0.414000
57832     57832     guizhou        108.6744       26.9583          132       155     2012      08        12        225              0.234667      29.099609       0.503692       0.270124   -9999.000000       0.246400       0.166900   -9999.000000
57832     57832     guizhou        108.6744       26.9583          132       155     2012      08        13        226              0.232500      29.745514       2.525320       0.269329   -9999.000000   -9999.000000       0.138400       0.520000
57832     57832     guizhou        108.6744       26.9583          132       155     2012      08        14        227              0.242958      28.961700       1.976825       0.275242       0.273000   -9999.000000   -9999.000000       0.530000
57832     57832     guizhou        108.6744       26.9583          132       155     2012      08        15        228              0.239500      28.845947       7.454741       0.275578       0.268000       0.280700   -9999.000000   -9999.000000
57832     57832     guizhou        108.6744       26.9583          132       155     2012      08        16        229              0.232292      28.361389       0.568505       0.290539       0.221000   -9999.000000   -9999.000000       0.507000
57832     57832     guizhou        108.6744       26.9583          132       155     2012      08        17        230              0.240500      29.067688       6.094683       0.276148       0.234000       0.102000       0.149600   -9999.000000
57832     57832     guizhou        108.6744       26.9583          132       155     2012      08        18        231              0.244591      27.690918       0.947966       0.283535   -9999.000000       0.184200       0.148000       0.623000
57832     57832     guizhou        108.6744       26.9583          132       155     2012      08        19        232              0.233875      28.205872       0.892232       0.277188       0.272000   -9999.000000       0.137400       0.561000
57832     57832     guizhou        108.6744       26.9583          132       155     2012      08        20        233              0.227696      28.822662       3.329047       0.268155       0.249000       0.114600   -9999.000000   -9999.000000
57832     57832     guizhou        108.6744       26.9583          132       155     2012      08        21        234              0.277875      29.344940      20.556282       0.265088       0.385500   -9999.000000   -9999.000000       0.693000
57832     57832     guizhou        108.6744       26.9583          132       155     2012      08        22        235              0.317000      26.970490       0.514307       0.301546       0.350000       0.291600       0.153400   -9999.000000
57832     57832     guizhou        108.6744       26.9583          132       155     2012      08        23        236              0.302375      23.896942       0.000000       0.289360   -9999.000000       0.427700       0.164700       0.395000
57832     57832     guizhou        108.6744       26.9583          132       155     2012      08        24        237              0.285792      24.306519       0.000000       0.274840   -9999.000000   -9999.000000       0.167900       0.429000
57832     57832     guizhou        108.6744       26.9583          132       155     2012      08        25        238              0.000000      24.377472       0.000000       0.270763       0.357000       0.189500   -9999.000000       0.389000
57832     57832     guizhou        108.6744       26.9583          132       155     2012      08        26        239              0.247458      25.220490       0.000000       0.267023       0.356000   -9999.000000   -9999.000000       0.444000
57832     57832     guizhou        108.6744       26.9583          132       155     2012      08        27        240              0.237167      26.404449       0.000000       0.262936       0.331500       0.135000   -9999.000000   -9999.000000
57832     57832     guizhou        108.6744       26.9583          132       155     2012      08        28        241              0.230583      26.877838       5.225724       0.259094   -9999.000000       0.186300       0.124200       0.587000
57832     57832     guizhou        108.6744       26.9583          132       155     2012      08        29        242              0.230000      27.636200       0.344757       0.255537   -9999.000000   -9999.000000       0.129900   -9999.000000
57832     57832     guizhou        108.6744       26.9583          132       155     2012      08        30        243              0.227750      26.331024       0.058953       0.257941       0.376000       0.244500       0.121200       0.461000
57832     57832     guizhou        108.6744       26.9583          132       155     2012      08        31        244              0.232952      27.996948      14.535526       0.254293       0.346000       0.048700   -9999.000000       0.459000
57832     57832     guizhou        108.6744       26.9583          132       155     2012      09        01        245              0.231542      27.217529       0.169487       0.289036       0.188500   -9999.000000   -9999.000000   -9999.000000
57832     57832     guizhou        108.6744       26.9583          132       155     2012      09        02        246              0.228500      27.788208       3.059905       0.272932       0.193000       0.269200   -9999.000000       0.458000
57832     57832     guizhou        108.6744       26.9583          132       155     2012      09        03        247              0.246091      26.049713       2.132566       0.268501   -9999.000000   -9999.000000       0.148800   -9999.000000
57832     57832     guizhou        108.6744       26.9583          132       155     2012      09        04        248              0.235625      22.430176       0.000000       0.277538       0.219000       0.346200       0.149100       0.425000
57832     57832     guizhou        108.6744       26.9583          132       155     2012      09        05        249              0.227043      24.736115       0.000000       0.264248       0.200500       0.276600       0.140400       0.452000
57832     57832     guizhou        108.6744       26.9583          132       155     2012      09        06        250              0.222783      25.299774       0.306579       0.258985       0.202500   -9999.000000   -9999.000000   -9999.000000
57832     57832     guizhou        108.6744       26.9583          132       155     2012      09        07        251              0.220067      26.451019       0.000000       0.254951       0.191500       0.169200   -9999.000000       0.546000
57832     57832     guizhou        108.6744       26.9583          132       155     2012      09        08        252              0.216652      27.438538       3.145711       0.250869   -9999.000000   -9999.000000       0.143000   -9999.000000
57832     57832     guizhou        108.6744       26.9583          132       155     2012      09        09        253              0.217167      27.844849       4.054411       0.246978   -9999.000000       0.126500       0.156000       0.449000
57832     57832     guizhou        108.6744       26.9583          132       155     2012      09        10        254              0.235500      26.818024       0.377082       0.256700       0.212500       0.219000       0.186800   -9999.000000
57832     57832     guizhou        108.6744       26.9583          132       155     2012      09        11        255              0.225583      24.528137       0.000000       0.259203       0.150000   -9999.000000   -9999.000000       0.504000
57832     57832     guizhou        108.6744       26.9583          132       155     2012      09        12        256              0.244250      26.724854      24.335070       0.252228       0.159500       0.223400   -9999.000000       0.490000
57832     57832     guizhou        108.6744       26.9583          132       155     2012      09        13        257              0.287292      23.260406       5.640392       0.301533       0.163000   -9999.000000   -9999.000000   -9999.000000
57832     57832     guizhou        108.6744       26.9583          132       155     2012      09        14        258              0.279125      19.710907       0.000000       0.298149   -9999.000000       0.123400       0.184800       0.351000
57832     57832     guizhou        108.6744       26.9583          132       155     2012      09        15        259              0.251417      21.665710       0.142994       0.276707       0.160000       0.275600       0.175600   -9999.000000
57832     57832     guizhou        108.6744       26.9583          132       155     2012      09        16        260              0.263750      21.982330       8.603634       0.267593       0.183000   -9999.000000       0.197000       0.634000
57832     57832     guizhou        108.6744       26.9583          132       155     2012      09        17        261              0.277458      18.871582       0.000000       0.289007       0.171000       0.138700   -9999.000000       0.564000
57832     57832     guizhou        108.6744       26.9583          132       155     2012      09        18        262              0.268208      20.319244       0.229626       0.274835       0.146000       0.070900   -9999.000000   -9999.000000
57832     57832     guizhou        108.6744       26.9583          132       155     2012      09        19        263              0.249542      21.615784       0.000000       0.268209   -9999.000000   -9999.000000       0.141700       0.463000
57832     57832     guizhou        108.6744       26.9583          132       155     2012      09        20        264              0.268750      23.593994      19.476692       0.262211   -9999.000000       0.215400       0.153100   -9999.000000
57832     57832     guizhou        108.6744       26.9583          132       155     2012      09        21        265              0.314042      21.288177       5.801075       0.294431   -9999.000000   -9999.000000       0.150400       0.704000
57832     57832     guizhou        108.6744       26.9583          132       155     2012      09        22        266              0.315042      21.475311      19.293631       0.302561       0.199500       0.490100       0.136800       0.831000
57832     57832     guizhou        108.6744       26.9583          132       155     2012      09        23        267              0.333792      21.145599      44.225060       0.308953       0.221000       0.268600   -9999.000000       0.930000
57832     57832     guizhou        108.6744       26.9583          132       155     2012      09        24        268              0.316000      20.082733       4.309396       0.333825   -9999.000000   -9999.000000   -9999.000000       0.715000
57832     57832     guizhou        108.6744       26.9583          132       155     2012      09        25        269              0.324083      20.269958       0.269604       0.305710   -9999.000000       0.123400       0.107800   -9999.000000
57832     57832     guizhou        108.6744       26.9583          132       155     2012      09        26        270              0.322000      21.252350       1.029799       0.295762       0.205000   -9999.000000       0.106800       0.740000
57832     57832     guizhou        108.6744       26.9583          132       155     2012      09        27        271              0.321714      21.415894       0.765539       0.292511       0.180000       0.146600       0.102400   -9999.000000
57832     57832     guizhou        108.6744       26.9583          132       155     2012      09        28        272              0.317600      21.855713       0.000000       0.289773       0.170000   -9999.000000   -9999.000000       0.694000
57832     57832     guizhou        108.6744       26.9583          132       155     2012      09        29        273              0.308292      21.587646       0.000000       0.285161       0.151000   -9999.000000   -9999.000000       0.629000
57832     57832     guizhou        108.6744       26.9583          132       155     2012      09        30        274              0.281333      21.510345       1.129427       0.280603   -9999.000000       0.167400   -9999.000000   -9999.000000
57832     57832     guizhou        108.6744       26.9583          132       155     2012      10        01        275              0.262542      21.111847       0.000000       0.278113   -9999.000000   -9999.000000       0.134600       0.474000
57832     57832     guizhou        108.6744       26.9583          132       155     2012      10        02        276              0.250000      21.545166       2.780777       0.276724       0.095000       0.137600       0.145700   -9999.000000
57832     57832     guizhou        108.6744       26.9583          132       155     2012      10        03        277              0.258625      22.242889      10.694102       0.278054       0.127000       0.291900       0.143300       0.759000
57832     57832     guizhou        108.6744       26.9583          132       155     2012      10        04        278              0.303458      18.999969      10.519573       0.300479       0.131000   -9999.000000   -9999.000000       0.697000
57832     57832     guizhou        108.6744       26.9583          132       155     2012      10        05        279              0.324125      17.764923       2.912563       0.310002   -9999.000000       0.285900   -9999.000000   -9999.000000
57832     57832     guizhou        108.6744       26.9583          132       155     2012      10        06        280              0.321292      17.692657       0.078410       0.297695   -9999.000000       0.250800       0.150400       0.764000
57832     57832     guizhou        108.6744       26.9583          132       155     2012      10        07        281              0.319000      17.658295       0.088130       0.288194       0.117000   -9999.000000       0.150900   -9999.000000
57832     57832     guizhou        108.6744       26.9583          132       155     2012      10        08        282              0.317625      18.009003       2.460498       0.285196       0.124000       0.274300       0.078900       0.630000
57832     57832     guizhou        108.6744       26.9583          132       155     2012      10        09        283              0.328083      18.110321       1.770081       0.286407       0.104500   -9999.000000       0.069400   -9999.000000
57832     57832     guizhou        108.6744       26.9583          132       155     2012      10        10        284              0.320833      18.457947       0.000000       0.291668       0.106000       0.220300   -9999.000000       0.540000
57832     57832     guizhou        108.6744       26.9583          132       155     2012      10        11        285              0.315583      19.616852       0.000000       0.283599   -9999.000000       0.297400   -9999.000000       0.575000
57832     57832     guizhou        108.6744       26.9583          132       155     2012      10        12        286              0.311417      18.902313       1.061575       0.280701       0.159000   -9999.000000       0.071300   -9999.000000
57832     57832     guizhou        108.6744       26.9583          132       155     2012      10        13        287              0.315208      18.306366       4.077759       0.281864       0.163000       0.155300       0.073800       0.642000
57832     57832     guizhou        108.6744       26.9583          132       155     2012      10        14        288              0.315000      17.660065       0.151532       0.291353       0.166500   -9999.000000       0.071500   -9999.000000
57832     57832     guizhou        108.6744       26.9583          132       155     2012      10        15        289              0.315000      17.055450       0.554095       0.285355       0.150000       0.125800   -9999.000000       0.586000
57832     57832     guizhou        108.6744       26.9583          132       155     2012      10        16        290              0.329250      17.258942       2.806411       0.282215   -9999.000000       0.192600   -9999.000000       0.642000
57832     57832     guizhou        108.6744       26.9583          132       155     2012      10        17        291              0.322083      18.358246       0.000000       0.287321   -9999.000000   -9999.000000   -9999.000000   -9999.000000
57832     57832     guizhou        108.6744       26.9583          132       155     2012      10        18        292              0.312217      17.952881       0.000000       0.278100       0.143500   -9999.000000       0.152100       0.331000
57832     57832     guizhou        108.6744       26.9583          132       155     2012      10        19        293              0.305500      18.629669       0.224635       0.275167       0.152000   -9999.000000       0.156600   -9999.000000
57832     57832     guizhou        108.6744       26.9583          132       155     2012      10        20        294              0.300000      19.352264       0.000000       0.275178       0.136000       0.034000       0.149700       0.599000
57832     57832     guizhou        108.6744       26.9583          132       155     2012      10        21        295              0.281882      21.653748       8.740370       0.273592   -9999.000000       0.244700   -9999.000000       0.465000
57832     57832     guizhou        108.6744       26.9583          132       155     2012      10        22        296              0.318667      22.318604       2.366816       0.280223   -9999.000000   -9999.000000   -9999.000000       0.537000
57832     57832     guizhou        108.6744       26.9583          132       155     2012      10        23        297              0.311318      17.763458       0.000000       0.293798   -9999.000000       0.305800       0.058900       0.529000
57832     57832     guizhou        108.6744       26.9583          132       155     2012      10        24        298              0.307875      17.078278       0.522832       0.280484   -9999.000000       0.085100       0.059100   -9999.000000
57832     57832     guizhou        108.6744       26.9583          132       155     2012      10        25        299              0.000000      15.901703       0.000000       0.279323       0.174500   -9999.000000       0.057400       0.500000
57832     57832     guizhou        108.6744       26.9583          132       155     2012      10        26        300              0.294000      17.194794       1.115703       0.276155       0.169000       0.274100   -9999.000000   -9999.000000
57832     57832     guizhou        108.6744       26.9583          132       155     2012      10        27        301              0.287500      18.743286       0.000000       0.275806   -9999.000000   -9999.000000   -9999.000000       0.446000
57832     57832     guizhou        108.6744       26.9583          132       155     2012      10        28        302              0.000000      18.415131       6.630258       0.275694   -9999.000000       0.177400   -9999.000000       0.540000
57832     57832     guizhou        108.6744       26.9583          132       155     2012      10        29        303              0.330357      19.586029      21.112894       0.286341       0.192000       0.279200       0.135900   -9999.000000
57832     57832     guizhou        108.6744       26.9583          132       155     2012      10        30        304              0.000000      18.906830       1.151369       0.313219       0.172000   -9999.000000       0.136900       0.426000
57832     57832     guizhou        108.6744       26.9583          132       155     2012      10        31        305              0.316765      16.463226       0.000000       0.293622       0.160500       0.185600       0.129600   -9999.000000
57832     57832     guizhou        108.6744       26.9583          132       155     2012      11        01        306              0.307250      16.816833       0.000000       0.282781   -9999.000000   -9999.000000   -9999.000000       0.392000
57832     57832     guizhou        108.6744       26.9583          132       155     2012      11        02        307              0.295667      16.405518       0.118819       0.278733   -9999.000000       0.148700   -9999.000000       0.435000
57832     57832     guizhou        108.6744       26.9583          132       155     2012      11        03        308              0.293750      17.883789       3.230906       0.275742       0.130500       0.321800   -9999.000000       0.464000
57832     57832     guizhou        108.6744       26.9583          132       155     2012      11        04        309              0.288042      16.847870       0.616780       0.285265       0.128000   -9999.000000       0.135400       0.345000
57832     57832     guizhou        108.6744       26.9583          132       155     2012      11        05        310              0.315625      16.824615      15.402002       0.277423       0.140000       0.235300       0.131200   -9999.000000
57832     57832     guizhou        108.6744       26.9583          132       155     2012      11        06        311              0.334458      13.725067      28.912897       0.309415       0.148000   -9999.000000       0.137100       0.743000
57832     57832     guizhou        108.6744       26.9583          132       155     2012      11        07        312              0.344958      13.175781      14.723011       0.318167   -9999.000000       0.116200   -9999.000000   -9999.000000
57832     57832     guizhou        108.6744       26.9583          132       155     2012      11        08        313              0.336500      12.554901       0.499888       0.321338       0.166000       0.257800   -9999.000000       0.651000
57832     57832     guizhou        108.6744       26.9583          132       155     2012      11        09        314              0.337750      12.187103       0.072272       0.300805       0.169000   -9999.000000       0.139700       0.561000
57832     57832     guizhou        108.6744       26.9583          132       155     2012      11        10        315              0.331667      11.538116       0.000000       0.293245       0.137000       0.349500       0.134800   -9999.000000
57832     57832     guizhou        108.6744       26.9583          132       155     2012      11        11        316              0.325208      12.511017       0.000000       0.290437       0.111000       0.201500       0.127400       0.392000
57832     57832     guizhou        108.6744       26.9583          132       155     2012      11        12        317              0.320333      13.797638       0.000000       0.287087   -9999.000000       0.180400   -9999.000000   -9999.000000
57832     57832     guizhou        108.6744       26.9583          132       155     2012      11        13        318              0.000000      12.466156       0.000000       0.286241   -9999.000000       0.248400   -9999.000000       0.490000
57832     57832     guizhou        108.6744       26.9583          132       155     2012      11        14        319              0.310292      15.205902       0.333510       0.284636       0.130500   -9999.000000   -9999.000000       0.445000
57832     57832     guizhou        108.6744       26.9583          132       155     2012      11        15        320              0.339958      15.388245       6.999914       0.284723       0.137000       0.275400       0.140700   -9999.000000
57832     57832     guizhou        108.6744       26.9583          132       155     2012      11        16        321              0.348792      12.945587       4.298380       0.294241       0.120000       0.293300       0.136200       0.396000
57832     57832     guizhou        108.6744       26.9583          132       155     2012      11        17        322              0.000000      10.542755       0.000000       0.300900   -9999.000000   -9999.000000       0.125900   -9999.000000
57832     57832     guizhou        108.6744       26.9583          132       155     2012      11        18        323              0.335500      12.222900       0.000000       0.288829   -9999.000000       0.150300   -9999.000000       0.439000
57832     57832     guizhou        108.6744       26.9583          132       155     2012      11        19        324              0.331292      11.867371       1.473838       0.285762       0.126000   -9999.000000   -9999.000000   -9999.000000
57832     57832     guizhou        108.6744       26.9583          132       155     2012      11        20        325              0.329625      11.610443       0.522442       0.286974       0.136500       0.228000       0.085000       0.372000
57832     57832     guizhou        108.6744       26.9583          132       155     2012      11        21        326              0.329125      11.009491       0.536078       0.287549       0.116500       0.296200       0.089900       0.424000
57832     57832     guizhou        108.6744       26.9583          132       155     2012      11        22        327              0.329708      10.853943      29.216461       0.286425       0.112000   -9999.000000       0.088800   -9999.000000
57832     57832     guizhou        108.6744       26.9583          132       155     2012      11        23        328              0.328708      10.295074       0.428846       0.319103   -9999.000000       0.155100       0.084800       0.311000
57832     57832     guizhou        108.6744       26.9583          132       155     2012      11        24        329              0.328333       9.029785       0.347401       0.301240   -9999.000000   -9999.000000   -9999.000000   -9999.000000
57832     57832     guizhou        108.6744       26.9583          132       155     2012      11        25        330              0.329000       8.047150       0.628873       0.293166       0.118000       0.302000   -9999.000000       0.296000
57832     57832     guizhou        108.6744       26.9583          132       155     2012      11        26        331              0.327500       8.550079       0.000000       0.291779       0.109000       0.205200   -9999.000000       0.320000
57832     57832     guizhou        108.6744       26.9583          132       155     2012      11        27        332              0.323083       9.077087       0.000000       0.288705       0.115000   -9999.000000       0.069200   -9999.000000
57832     57832     guizhou        108.6744       26.9583          132       155     2012      11        28        333              0.317958       8.487305       0.000000       0.287286   -9999.000000       0.484900       0.062900       0.342000
57832     57832     guizhou        108.6744       26.9583          132       155     2012      11        29        334              0.315750       9.953796       0.913624       0.285959   -9999.000000   -9999.000000   -9999.000000   -9999.000000
57832     57832     guizhou        108.6744       26.9583          132       155     2012      11        30        335              0.332208       8.082825       4.200014       0.286734       0.119000       0.142900   -9999.000000       0.440000
57832     57832     guizhou        108.6744       26.9583          132       155     2012      12        01        336              0.352583       7.094116       0.302303       0.292325       0.116500       0.236400   -9999.000000       0.449000
57832     57832     guizhou        108.6744       26.9583          132       155     2012      12        02        337              0.346583       7.527527       1.079549       0.290010       0.105000   -9999.000000       0.066100       0.326000
57832     57832     guizhou        108.6744       26.9583          132       155     2012      12        03        338              0.349391       8.528656       0.000000       0.285333       0.102000       0.370000       0.083600       0.235000
57832     57832     guizhou        108.6744       26.9583          132       155     2012      12        04        339              0.350000       8.551270       0.000000       0.283134   -9999.000000       0.277300       0.079700   -9999.000000
57832     57832     guizhou        108.6744       26.9583          132       155     2012      12        05        340              0.345875       7.064331       0.000000       0.282448   -9999.000000   -9999.000000   -9999.000000       0.190000
57832     57832     guizhou        108.6744       26.9583          132       155     2012      12        06        341              0.338417       9.395752       0.000000       0.280414       0.103500       0.084700   -9999.000000   -9999.000000
57832     57832     guizhou        108.6744       26.9583          132       155     2012      12        07        342              0.331292       9.187927       0.000000       0.279584       0.106500   -9999.000000       0.078500       0.236000
57832     57832     guizhou        108.6744       26.9583          132       155     2012      12        08        343              0.324667       8.543427       1.722490       0.279695       0.105000       0.223600       0.087100       0.375000
57832     57832     guizhou        108.6744       26.9583          132       155     2012      12        09        344              0.352375      10.460968      15.522603       0.280672   -9999.000000       0.229200       0.095500   -9999.000000
57832     57832     guizhou        108.6744       26.9583          132       155     2012      12        10        345              0.369083       6.829773       2.168890       0.305138   -9999.000000   -9999.000000   -9999.000000       0.259000
57832     57832     guizhou        108.6744       26.9583          132       155     2012      12        11        346              0.362292       5.209839       3.523812       0.300532       0.137500       0.248200   -9999.000000   -9999.000000
57832     57832     guizhou        108.6744       26.9583          132       155     2012      12        12        347              0.367500       5.840271       1.014820       0.292167       0.135000   -9999.000000   -9999.000000       0.498000
57832     57832     guizhou        108.6744       26.9583          132       155     2012      12        13        348              0.363875       5.630554       0.000000       0.292074       0.103000       0.319200       0.052900       0.557000
57832     57832     guizhou        108.6744       26.9583          132       155     2012      12        14        349              0.358625       7.415100       0.051469       0.286244   -9999.000000       0.234700       0.055000   -9999.000000
57832     57832     guizhou        108.6744       26.9583          132       155     2012      12        15        350              0.000000       8.175140       0.080645       0.283964   -9999.000000   -9999.000000       0.052300       0.227000
57832     57832     guizhou        108.6744       26.9583          132       155     2012      12        16        351              0.354000       6.858093       0.078080       0.282925       0.139000       0.361500   -9999.000000   -9999.000000
57832     57832     guizhou        108.6744       26.9583          132       155     2012      12        17        352              0.352167       6.503448       0.064798       0.282282       0.137000   -9999.000000   -9999.000000       0.392000
57832     57832     guizhou        108.6744       26.9583          132       155     2012      12        18        353              0.350000       5.255676       0.000000       0.281624       0.132500       0.357100   -9999.000000       0.271000
57832     57832     guizhou        108.6744       26.9583          132       155     2012      12        19        354              0.351542       4.750244       0.977908       0.280697       0.138000       0.376000       0.064700       0.221000
57832     57832     guizhou        108.6744       26.9583          132       155     2012      12        20        355              0.000000       3.528931       1.776244       0.281951   -9999.000000   -9999.000000       0.063900       0.415000
57832     57832     guizhou        108.6744       26.9583          132       155     2012      12        21        356              0.368667       3.093170       0.340646       0.285939   -9999.000000       0.187700       0.059400   -9999.000000
57832     57832     guizhou        108.6744       26.9583          132       155     2012      12        22        357              0.361708       3.451569       0.000000       0.282321       0.122000       0.187900   -9999.000000       0.410000
57832     57832     guizhou        108.6744       26.9583          132       155     2012      12        23        358              0.356625       3.588715       0.000000       0.279809       0.114000   -9999.000000   -9999.000000   -9999.000000
57832     57832     guizhou        108.6744       26.9583          132       155     2012      12        24        359              0.354000       4.761627       0.100691       0.277091       0.105000       0.180900       0.061500       0.251000
57832     57832     guizhou        108.6744       26.9583          132       155     2012      12        25        360              0.354542       6.395538       3.107902       0.276776   -9999.000000   -9999.000000       0.066500       0.256000
57832     57832     guizhou        108.6744       26.9583          132       155     2012      12        26        361              0.000000       3.541779       1.208382       0.280985   -9999.000000       0.193700       0.068000   -9999.000000
57832     57832     guizhou        108.6744       26.9583          132       155     2012      12        27        362              0.374250       1.848389       1.491877       0.279257   -9999.000000   -9999.000000   -9999.000000       0.430000
57832     57832     guizhou        108.6744       26.9583          132       155     2012      12        28        363              0.369000       1.852875       3.173396       0.279228       0.134000   -9999.000000   -9999.000000   -9999.000000
57832     57832     guizhou        108.6744       26.9583          132       155     2012      12        29        364              0.000000       2.107056       0.273403       0.280515   -9999.000000   -9999.000000   -9999.000000       0.315000
57832     57832     guizhou        108.6744       26.9583          132       155     2012      12        30        365              0.000000       1.485077       0.971813       0.278806   -9999.000000   -9999.000000       0.059800       0.308000
57832     57832     guizhou        108.6744       26.9583          132       155     2012      12        31        366              0.364800       2.089172       0.983049       0.275150   -9999.000000       0.277700       0.054300   -9999.000000
