# Supplementary material for: Research on Fusing Multisatellite Soil Moisture Data Based on Bayesian Model Averaging
Source: Hindawi journal article supplement (doi:10.1155/2018/9310838), 2018-06-25
Supplement: f1 [file 9310838.f1.zip › 2012_sm00-10cm_daily_ZDB_ZHY_57841_366days_allin.txt]

57841     57841     hunan          109.6697       26.5697          134       159     2012      01        01        001              0.000000   -9999.000000       0.470168   -9999.000000       0.112500   -9999.000000       0.054000   -9999.000000
57841     57841     hunan          109.6697       26.5697          134       159     2012      01        02        002              0.260565       5.389496      10.066339       0.301315       0.130000       0.050600   -9999.000000       0.294000
57841     57841     hunan          109.6697       26.5697          134       159     2012      01        03        003              0.000000       5.143951       8.718368       0.315104   -9999.000000   -9999.000000   -9999.000000   -9999.000000
57841     57841     hunan          109.6697       26.5697          134       159     2012      01        04        004              0.315458       3.432343       0.930814       0.321898   -9999.000000   -9999.000000       0.044500   -9999.000000
57841     57841     hunan          109.6697       26.5697          134       159     2012      01        05        005              0.321542       3.030914       5.522110       0.305449       0.137500   -9999.000000       0.046200       0.080000
57841     57841     hunan          109.6697       26.5697          134       159     2012      01        06        006              0.315083       1.607666       1.142065       0.308348       0.124000   -9999.000000       0.045200   -9999.000000
57841     57841     hunan          109.6697       26.5697          134       159     2012      01        07        007              0.309625       2.468567       0.000000       0.307883       0.127000       0.037500   -9999.000000       0.017000
57841     57841     hunan          109.6697       26.5697          134       159     2012      01        08        008              0.000000       3.288361       0.000000       0.302476   -9999.000000   -9999.000000   -9999.000000   -9999.000000
57841     57841     hunan          109.6697       26.5697          134       159     2012      01        09        009              0.301292       4.375488       0.000000       0.300345   -9999.000000       0.061000   -9999.000000       0.171000
57841     57841     hunan          109.6697       26.5697          134       159     2012      01        10        010              0.297417       5.102264       0.000000       0.299122       0.123500       0.147200       0.038400       0.126000
57841     57841     hunan          109.6697       26.5697          134       159     2012      01        11        011              0.293958       5.334534       0.000000       0.298248       0.086500   -9999.000000       0.038800   -9999.000000
57841     57841     hunan          109.6697       26.5697          134       159     2012      01        12        012              0.292542       4.147675       1.402095       0.298115       0.080000       0.082600       0.039900       0.042000
57841     57841     hunan          109.6697       26.5697          134       159     2012      01        13        013              0.295125       4.357635       6.663397       0.299803       0.083000   -9999.000000   -9999.000000   -9999.000000
57841     57841     hunan          109.6697       26.5697          134       159     2012      01        14        014              0.340043       4.179749      34.925392       0.306883   -9999.000000   -9999.000000   -9999.000000       0.413000
57841     57841     hunan          109.6697       26.5697          134       159     2012      01        15        015              0.330773       3.839691       2.780916       0.340471   -9999.000000   -9999.000000       0.040000   -9999.000000
57841     57841     hunan          109.6697       26.5697          134       159     2012      01        16        016              0.317375       3.117401       0.662190       0.326387       0.087000   -9999.000000       0.035700       0.126000
57841     57841     hunan          109.6697       26.5697          134       159     2012      01        17        017              0.000000       3.328827       9.935688       0.313960       0.088500       0.020800       0.038500       0.239000
57841     57841     hunan          109.6697       26.5697          134       159     2012      01        18        018              0.330450       3.554138       4.757218       0.321207       0.091000       0.029100       0.037300   -9999.000000
57841     57841     hunan          109.6697       26.5697          134       159     2012      01        19        019              0.325636       3.546539       1.219637       0.322047   -9999.000000   -9999.000000   -9999.000000       0.277000
57841     57841     hunan          109.6697       26.5697          134       159     2012      01        20        020              0.328792       3.755646       2.355144       0.314899   -9999.000000   -9999.000000   -9999.000000   -9999.000000
57841     57841     hunan          109.6697       26.5697          134       159     2012      01        21        021              0.333417       3.468811       1.780592       0.314448       0.119500   -9999.000000       0.037900       0.280000
57841     57841     hunan          109.6697       26.5697          134       159     2012      01        22        022              0.328250       2.634644       0.300110       0.312848   -9999.000000   -9999.000000       0.036900       0.047000
57841     57841     hunan          109.6697       26.5697          134       159     2012      01        23        023              0.318167       1.395050       2.441155       0.300578       0.115000       0.127400       0.038100   -9999.000000
57841     57841     hunan          109.6697       26.5697          134       159     2012      01        24        024              0.315708       1.059875       0.081455       0.287819   -9999.000000   -9999.000000   -9999.000000       0.001000
57841     57841     hunan          109.6697       26.5697          134       159     2012      01        25        025              0.312042       1.078766       0.725143       0.285073   -9999.000000       0.075600   -9999.000000   -9999.000000
57841     57841     hunan          109.6697       26.5697          134       159     2012      01        26        026              0.307583       2.629639       0.000000       0.299139       0.110000   -9999.000000   -9999.000000       0.013000
57841     57841     hunan          109.6697       26.5697          134       159     2012      01        27        027              0.304125       2.720551       0.343244       0.302639       0.109000       0.126900       0.036000   -9999.000000
57841     57841     hunan          109.6697       26.5697          134       159     2012      01        28        028              0.301792       3.211029       0.000000       0.302267       0.096500   -9999.000000       0.036300       0.050000
57841     57841     hunan          109.6697       26.5697          134       159     2012      01        29        029              0.299958       3.578094       0.000000       0.301661   -9999.000000   -9999.000000       0.034600       0.101000
57841     57841     hunan          109.6697       26.5697          134       159     2012      01        30        030              0.297000       4.554382       0.000000       0.300836   -9999.000000       0.078300   -9999.000000   -9999.000000
57841     57841     hunan          109.6697       26.5697          134       159     2012      01        31        031              0.293708       4.546722       0.000000       0.299983       0.104000   -9999.000000   -9999.000000       0.079000
57841     57841     hunan          109.6697       26.5697          134       159     2012      02        01        032              0.291417       6.941193       2.124610       0.298524       0.107500   -9999.000000       0.057000   -9999.000000
57841     57841     hunan          109.6697       26.5697          134       159     2012      02        02        033              0.306500       6.079559       4.618839       0.301682       0.105500       0.161700       0.055600       0.145000
57841     57841     hunan          109.6697       26.5697          134       159     2012      02        03        034              0.319208       2.902588       1.382024       0.307368       0.108000   -9999.000000       0.061000       0.088000
57841     57841     hunan          109.6697       26.5697          134       159     2012      02        04        035              0.318917       2.694122       0.281477       0.306670   -9999.000000       0.099900   -9999.000000   -9999.000000
57841     57841     hunan          109.6697       26.5697          134       159     2012      02        05        036              0.320125       3.830994       1.866215       0.303371       0.117000       0.135600   -9999.000000       0.267000
57841     57841     hunan          109.6697       26.5697          134       159     2012      02        06        037              0.320750       4.506104       0.000000       0.303592       0.107500   -9999.000000   -9999.000000   -9999.000000
57841     57841     hunan          109.6697       26.5697          134       159     2012      02        07        038              0.314917       4.507111       0.000000       0.300967       0.104000       0.111400       0.033100       0.168000
57841     57841     hunan          109.6697       26.5697          134       159     2012      02        08        039              0.307917       6.862366       0.000000       0.297369   -9999.000000   -9999.000000       0.036000       0.030000
57841     57841     hunan          109.6697       26.5697          134       159     2012      02        09        040              0.304083       3.042969       2.869550       0.296263   -9999.000000       0.006100       0.036500       0.156000
57841     57841     hunan          109.6697       26.5697          134       159     2012      02        10        041              0.313739       1.934204       0.083746       0.296669   -9999.000000   -9999.000000   -9999.000000       0.345000
57841     57841     hunan          109.6697       26.5697          134       159     2012      02        11        042              0.312000       1.826263       1.170782       0.299653       0.116000   -9999.000000   -9999.000000   -9999.000000
57841     57841     hunan          109.6697       26.5697          134       159     2012      02        12        043              0.314917       3.092560       5.314071       0.298411       0.115000       0.046100   -9999.000000       0.317000
57841     57841     hunan          109.6697       26.5697          134       159     2012      02        13        044              0.330625       3.110535       3.544946       0.306968       0.109000   -9999.000000       0.038200   -9999.000000
57841     57841     hunan          109.6697       26.5697          134       159     2012      02        14        045              0.329167       4.013092       1.762515       0.309320   -9999.000000       0.058000       0.037500       0.375000
57841     57841     hunan          109.6697       26.5697          134       159     2012      02        15        046              0.323833       3.932068       0.300448       0.305672   -9999.000000   -9999.000000       0.036100       0.367000
57841     57841     hunan          109.6697       26.5697          134       159     2012      02        16        047              0.320292       3.501678       0.000000       0.301163       0.106500   -9999.000000   -9999.000000   -9999.000000
57841     57841     hunan          109.6697       26.5697          134       159     2012      02        17        048              0.314833       4.238892       0.000000       0.298344       0.104000       0.049000   -9999.000000       0.162000
57841     57841     hunan          109.6697       26.5697          134       159     2012      02        18        049              0.310750       4.419067       0.000000       0.296753       0.100500   -9999.000000       0.034100   -9999.000000
57841     57841     hunan          109.6697       26.5697          134       159     2012      02        19        050              0.308417       3.405487       2.270935       0.295689   -9999.000000       0.021800       0.036600       0.172000
57841     57841     hunan          109.6697       26.5697          134       159     2012      02        20        051              0.304500       6.717468       1.013626       0.293860   -9999.000000       0.068400       0.031500       0.171000
57841     57841     hunan          109.6697       26.5697          134       159     2012      02        21        052              0.302958       7.304535       1.781489       0.295343       0.081000   -9999.000000   -9999.000000   -9999.000000
57841     57841     hunan          109.6697       26.5697          134       159     2012      02        22        053              0.314208       6.749268       6.246869       0.298997       0.084000       0.100800   -9999.000000       0.538000
57841     57841     hunan          109.6697       26.5697          134       159     2012      02        23        054              0.327083       7.013550       5.810553       0.306722       0.074000       0.050200   -9999.000000   -9999.000000
57841     57841     hunan          109.6697       26.5697          134       159     2012      02        24        055              0.329208       7.744110       1.384914       0.307870       0.081000   -9999.000000       0.035200       0.357000
57841     57841     hunan          109.6697       26.5697          134       159     2012      02        25        056              0.325792       6.362610       0.525945       0.308340   -9999.000000       0.235600       0.035300   -9999.000000
57841     57841     hunan          109.6697       26.5697          134       159     2012      02        26        057              0.322583       4.435547       0.193550       0.302023       0.086000   -9999.000000       0.032600       0.132000
57841     57841     hunan          109.6697       26.5697          134       159     2012      02        27        058              0.318375       3.160919       0.138728       0.297709   -9999.000000       0.022600   -9999.000000       0.149000
57841     57841     hunan          109.6697       26.5697          134       159     2012      02        28        059              0.315208       3.567444       5.854156       0.295971       0.085500   -9999.000000   -9999.000000   -9999.000000
57841     57841     hunan          109.6697       26.5697          134       159     2012      02        29        060              0.000000   -9999.000000       2.470519   -9999.000000       0.077000   -9999.000000   -9999.000000   -9999.000000
57841     57841     hunan          109.6697       26.5697          134       159     2012      03        01        061              0.317042       4.527191       5.950635       0.303959   -9999.000000       0.113600       0.031100   -9999.000000
57841     57841     hunan          109.6697       26.5697          134       159     2012      03        02        062              0.322583       5.934784      16.275114       0.310369   -9999.000000   -9999.000000       0.034000       0.372000
57841     57841     hunan          109.6697       26.5697          134       159     2012      03        03        063              0.335375       6.201447      35.313988       0.316603       0.144000       0.178000       0.034100       0.415000
57841     57841     hunan          109.6697       26.5697          134       159     2012      03        04        064              0.343083       5.743408      31.980425       0.336305       0.146000       0.204300   -9999.000000   -9999.000000
57841     57841     hunan          109.6697       26.5697          134       159     2012      03        05        065              0.329217       5.084564       0.755266       0.394601       0.127500   -9999.000000   -9999.000000       0.335000
57841     57841     hunan          109.6697       26.5697          134       159     2012      03        06        066              0.322625       6.530426       6.464513       0.374822   -9999.000000       0.114900       0.040300   -9999.000000
57841     57841     hunan          109.6697       26.5697          134       159     2012      03        07        067              0.000000       6.018524       6.187043       0.331680   -9999.000000   -9999.000000       0.042900       0.428000
57841     57841     hunan          109.6697       26.5697          134       159     2012      03        08        068              0.334208       5.497101       6.479788       0.325750       0.146000       0.066300       0.040800       0.501000
57841     57841     hunan          109.6697       26.5697          134       159     2012      03        09        069              0.330458       5.324860       1.043979       0.325966       0.134000       0.186000   -9999.000000       0.223000
57841     57841     hunan          109.6697       26.5697          134       159     2012      03        10        070              0.322958       4.816589       0.000000       0.318985       0.110500   -9999.000000   -9999.000000       0.324000
57841     57841     hunan          109.6697       26.5697          134       159     2012      03        11        071              0.315500       7.634521       0.000000       0.312558       0.085000       0.270300   -9999.000000   -9999.000000
57841     57841     hunan          109.6697       26.5697          134       159     2012      03        12        072              0.308917       9.776520       0.000000       0.308756   -9999.000000       0.218100       0.032100       0.298000
57841     57841     hunan          109.6697       26.5697          134       159     2012      03        13        073              0.303583       9.724365       3.850321       0.306488       0.096000   -9999.000000       0.033900   -9999.000000
57841     57841     hunan          109.6697       26.5697          134       159     2012      03        14        074              0.299167      11.810608      22.316406       0.303954       0.102000       0.042900   -9999.000000       0.351000
57841     57841     hunan          109.6697       26.5697          134       159     2012      03        15        075              0.324750      10.917358       4.889815       0.322776       0.092500   -9999.000000   -9999.000000       0.490000
57841     57841     hunan          109.6697       26.5697          134       159     2012      03        16        076              0.323500      10.169373       2.415078       0.323772       0.091000       0.025000   -9999.000000   -9999.000000
57841     57841     hunan          109.6697       26.5697          134       159     2012      03        17        077              0.321208      11.042938       0.112235       0.314828   -9999.000000       0.168500   -9999.000000       0.524000
57841     57841     hunan          109.6697       26.5697          134       159     2012      03        18        078              0.318458      11.544037       0.598145       0.311079   -9999.000000   -9999.000000       0.033400   -9999.000000
57841     57841     hunan          109.6697       26.5697          134       159     2012      03        19        079              0.315542      12.766357       0.000000       0.308629       0.087500       0.243500       0.043700       0.406000
57841     57841     hunan          109.6697       26.5697          134       159     2012      03        20        080              0.309750      14.240814       0.533360       0.305634       0.090000   -9999.000000       0.043000       0.224000
57841     57841     hunan          109.6697       26.5697          134       159     2012      03        21        081              0.306792      10.262390       0.710994       0.303798       0.071000       0.125900   -9999.000000   -9999.000000
57841     57841     hunan          109.6697       26.5697          134       159     2012      03        22        082              0.321583       9.192749      14.946284       0.304193   -9999.000000       0.281600   -9999.000000       0.544000
57841     57841     hunan          109.6697       26.5697          134       159     2012      03        23        083              0.332833       8.376434       0.201651       0.319834   -9999.000000   -9999.000000       0.039200   -9999.000000
57841     57841     hunan          109.6697       26.5697          134       159     2012      03        24        084              0.320333       9.749451       0.000000       0.313059       0.071500       0.011100       0.037400       0.284000
57841     57841     hunan          109.6697       26.5697          134       159     2012      03        25        085              0.000000      13.738007       0.000000       0.303287       0.066000   -9999.000000       0.037900   -9999.000000
57841     57841     hunan          109.6697       26.5697          134       159     2012      03        26        086              0.301375      15.470703       0.000000       0.298799       0.065000       0.089800   -9999.000000   -9999.000000
57841     57841     hunan          109.6697       26.5697          134       159     2012      03        27        087              0.293708      16.063202       2.622556       0.296732   -9999.000000       0.249600   -9999.000000       0.539000
57841     57841     hunan          109.6697       26.5697          134       159     2012      03        28        088              0.302167      16.630157      19.175581       0.296757   -9999.000000   -9999.000000   -9999.000000   -9999.000000
57841     57841     hunan          109.6697       26.5697          134       159     2012      03        29        089              0.326917      14.791656      11.242211       0.328647       0.078000       0.128000       0.062300       0.715000
57841     57841     hunan          109.6697       26.5697          134       159     2012      03        30        090              0.344875      15.148376       7.800194       0.321393       0.077000   -9999.000000       0.059200   -9999.000000
57841     57841     hunan          109.6697       26.5697          134       159     2012      03        31        091              0.324167      14.487579       0.000000       0.324622       0.058000   -9999.000000       0.057800       0.406000
57841     57841     hunan          109.6697       26.5697          134       159     2012      04        01        092              0.311458      16.183899       0.000000       0.306536       0.083000       0.149800   -9999.000000       0.579000
57841     57841     hunan          109.6697       26.5697          134       159     2012      04        02        093              0.300333      18.223633       0.371087       0.300594   -9999.000000   -9999.000000   -9999.000000   -9999.000000
57841     57841     hunan          109.6697       26.5697          134       159     2012      04        03        094              0.288583      19.175079       0.000000       0.299292       0.104000       0.245500       0.049700       0.340000
57841     57841     hunan          109.6697       26.5697          134       159     2012      04        04        095              0.276000      19.085266       1.304274       0.296541       0.096500   -9999.000000       0.047200   -9999.000000
57841     57841     hunan          109.6697       26.5697          134       159     2012      04        05        096              0.267333      17.491608       3.399692       0.297886       0.094000   -9999.000000       0.040600       0.310000
57841     57841     hunan          109.6697       26.5697          134       159     2012      04        06        097              0.264917      16.557861       0.960671       0.300468       0.095000       0.243900       0.046800       0.581000
57841     57841     hunan          109.6697       26.5697          134       159     2012      04        07        098              0.266542      15.806549       2.325182       0.303936   -9999.000000   -9999.000000   -9999.000000       0.468000
57841     57841     hunan          109.6697       26.5697          134       159     2012      04        08        099              0.271333      14.429871       0.000000       0.305016   -9999.000000       0.123600   -9999.000000       0.577000
57841     57841     hunan          109.6697       26.5697          134       159     2012      04        09        100              0.270583      17.188812       0.472376       0.298336       0.095500       0.118000       0.049700   -9999.000000
57841     57841     hunan          109.6697       26.5697          134       159     2012      04        10        101              0.264625      18.365936       1.289398       0.296078       0.088000   -9999.000000       0.051000       0.501000
57841     57841     hunan          109.6697       26.5697          134       159     2012      04        11        102              0.255333      21.178040       0.819286       0.292461       0.107000       0.365700       0.048000   -9999.000000
57841     57841     hunan          109.6697       26.5697          134       159     2012      04        12        103              0.278583      20.605713      31.944962       0.291835   -9999.000000   -9999.000000   -9999.000000       0.811000
57841     57841     hunan          109.6697       26.5697          134       159     2012      04        13        104              0.304875      20.023193       0.397323       0.357103   -9999.000000   -9999.000000   -9999.000000       0.430000
57841     57841     hunan          109.6697       26.5697          134       159     2012      04        14        105              0.302208      16.714600       1.221707       0.314251       0.131000       0.263200   -9999.000000   -9999.000000
57841     57841     hunan          109.6697       26.5697          134       159     2012      04        15        106              0.303417      16.051483       2.402514       0.304330       0.118500   -9999.000000       0.051600       0.380000
57841     57841     hunan          109.6697       26.5697          134       159     2012      04        16        107              0.304500      15.604309       1.141914       0.304111       0.102000       0.095000       0.076900   -9999.000000
57841     57841     hunan          109.6697       26.5697          134       159     2012      04        17        108              0.306417      18.773712      22.828266       0.303015   -9999.000000   -9999.000000       0.075600       0.422000
57841     57841     hunan          109.6697       26.5697          134       159     2012      04        18        109              0.327458      17.046143       4.041541       0.317082   -9999.000000   -9999.000000   -9999.000000       0.520000
57841     57841     hunan          109.6697       26.5697          134       159     2012      04        19        110              0.332167      18.086945      15.179051       0.321118   -9999.000000       0.081900   -9999.000000   -9999.000000
57841     57841     hunan          109.6697       26.5697          134       159     2012      04        20        111              0.331750      19.240265       0.693939       0.319859       0.115500   -9999.000000       0.075600       0.575000
57841     57841     hunan          109.6697       26.5697          134       159     2012      04        21        112              0.317708      18.248047       0.000000       0.319967       0.130000       0.078300       0.072200   -9999.000000
57841     57841     hunan          109.6697       26.5697          134       159     2012      04        22        113              0.303292      20.129791       0.746142       0.306171       0.127000   -9999.000000       0.071900       0.445000
57841     57841     hunan          109.6697       26.5697          134       159     2012      04        23        114              0.287875      22.214447       0.000000       0.300141   -9999.000000   -9999.000000       0.090000   -9999.000000
57841     57841     hunan          109.6697       26.5697          134       159     2012      04        24        115              0.291583      23.372528      30.633547       0.298363   -9999.000000       0.172200   -9999.000000       0.645000
57841     57841     hunan          109.6697       26.5697          134       159     2012      04        25        116              0.000000      25.204834       0.505566       0.332028       0.170000   -9999.000000   -9999.000000       0.683000
57841     57841     hunan          109.6697       26.5697          134       159     2012      04        26        117              0.309792      18.141052      13.038427       0.316298       0.151000       0.129200       0.085600   -9999.000000
57841     57841     hunan          109.6697       26.5697          134       159     2012      04        27        118              0.305208      20.747498       7.270802       0.315614       0.151500       0.383100       0.092900       0.445000
57841     57841     hunan          109.6697       26.5697          134       159     2012      04        28        119              0.302792      22.075439       4.875196       0.324436   -9999.000000   -9999.000000       0.093700   -9999.000000
57841     57841     hunan          109.6697       26.5697          134       159     2012      04        29        120              0.323208      22.229187      18.718895       0.315141   -9999.000000       0.179500   -9999.000000       0.630000
57841     57841     hunan          109.6697       26.5697          134       159     2012      04        30        121              0.331333      21.829071      10.000149       0.323980       0.159000   -9999.000000   -9999.000000       0.772000
57841     57841     hunan          109.6697       26.5697          134       159     2012      05        01        122              0.328750      23.716705      10.909520       0.332574       0.257000   -9999.000000   -9999.000000   -9999.000000
57841     57841     hunan          109.6697       26.5697          134       159     2012      05        02        123              0.338333      20.520569       5.312402       0.324769       0.249000       0.404400       0.108600       0.797000
57841     57841     hunan          109.6697       26.5697          134       159     2012      05        03        124              0.325250      19.991821       7.664072       0.328520   -9999.000000   -9999.000000       0.090600   -9999.000000
57841     57841     hunan          109.6697       26.5697          134       159     2012      05        04        125              0.346375      19.835724      15.581761       0.322248   -9999.000000       0.302900       0.108400       0.790000
57841     57841     hunan          109.6697       26.5697          134       159     2012      05        05        126              0.327375      19.683136       0.000000       0.336780       0.240000   -9999.000000   -9999.000000       0.693000
57841     57841     hunan          109.6697       26.5697          134       159     2012      05        06        127              0.317625      21.772858       0.165318       0.319740       0.223500       0.117000   -9999.000000       0.630000
57841     57841     hunan          109.6697       26.5697          134       159     2012      05        07        128              0.305333      23.943665       0.000000       0.314530   -9999.000000       0.073100       0.095300       0.758000
57841     57841     hunan          109.6697       26.5697          134       159     2012      05        08        129              0.288542      25.301605       0.000000       0.307808       0.200000   -9999.000000       0.093000   -9999.000000
57841     57841     hunan          109.6697       26.5697          134       159     2012      05        09        130              0.309625      25.786438      33.930439       0.302298   -9999.000000       0.154500       0.105200       1.000000
57841     57841     hunan          109.6697       26.5697          134       159     2012      05        10        131              0.321875      23.999176       0.114660       0.343241       0.244000       0.157000   -9999.000000   -9999.000000
57841     57841     hunan          109.6697       26.5697          134       159     2012      05        11        132              0.327333      23.328979       4.122891       0.316193       0.228000   -9999.000000   -9999.000000       0.578000
57841     57841     hunan          109.6697       26.5697          134       159     2012      05        12        133              0.331167      24.498413      14.686235       0.317326       0.255000       0.145400   -9999.000000       0.849000
57841     57841     hunan          109.6697       26.5697          134       159     2012      05        13        134              0.327833      22.785675       9.193789       0.329337       0.254000   -9999.000000       0.068000   -9999.000000
57841     57841     hunan          109.6697       26.5697          134       159     2012      05        14        135              0.346375      20.490204      14.278287       0.320865   -9999.000000       0.133500       0.116700       0.721000
57841     57841     hunan          109.6697       26.5697          134       159     2012      05        15        136              0.328958      19.018646       0.619159       0.332939   -9999.000000       0.284700       0.109700   -9999.000000
57841     57841     hunan          109.6697       26.5697          134       159     2012      05        16        137              0.318333      19.405975       0.227197       0.318849       0.212500   -9999.000000   -9999.000000       0.449000
57841     57841     hunan          109.6697       26.5697          134       159     2012      05        17        138              0.304500      21.146423       0.000000       0.312576       0.211000       0.091300   -9999.000000       0.613000
57841     57841     hunan          109.6697       26.5697          134       159     2012      05        18        139              0.290250      22.550140       2.807997       0.307526       0.198500   -9999.000000   -9999.000000   -9999.000000
57841     57841     hunan          109.6697       26.5697          134       159     2012      05        19        140              0.277083      25.131256       0.767801       0.302699   -9999.000000       0.191700       0.107500       0.571000
57841     57841     hunan          109.6697       26.5697          134       159     2012      05        20        141              0.262000      25.185852       0.000000       0.300415   -9999.000000       0.250100       0.110800   -9999.000000
57841     57841     hunan          109.6697       26.5697          134       159     2012      05        21        142              0.249042      25.240082       0.902470       0.295697       0.305500   -9999.000000       0.075100       0.476000
57841     57841     hunan          109.6697       26.5697          134       159     2012      05        22        143              0.281708      23.996368      34.585072       0.295879       0.363000       0.369000   -9999.000000   -9999.000000
57841     57841     hunan          109.6697       26.5697          134       159     2012      05        23        144              0.343958      21.947021       6.665982       0.332402   -9999.000000   -9999.000000   -9999.000000       0.913000
57841     57841     hunan          109.6697       26.5697          134       159     2012      05        24        145              0.343542      20.423889      14.489120       0.328228   -9999.000000   -9999.000000       0.086800       0.847000
57841     57841     hunan          109.6697       26.5697          134       159     2012      05        25        146              0.000000      19.474762      16.203106       0.329153   -9999.000000       0.071600       0.084700   -9999.000000
57841     57841     hunan          109.6697       26.5697          134       159     2012      05        26        147              0.334458      18.865234       0.391947       0.334200       0.361000   -9999.000000       0.081700       0.539000
57841     57841     hunan          109.6697       26.5697          134       159     2012      05        27        148              0.323958      19.891174       0.483954       0.321106       0.319500       0.142800   -9999.000000   -9999.000000
57841     57841     hunan          109.6697       26.5697          134       159     2012      05        28        149              0.315875      21.622192       0.146039       0.315590       0.265000       0.184300   -9999.000000       0.552000
57841     57841     hunan          109.6697       26.5697          134       159     2012      05        29        150              0.330417      23.051178      23.795521       0.311532   -9999.000000   -9999.000000   -9999.000000       0.687000
57841     57841     hunan          109.6697       26.5697          134       159     2012      05        30        151              0.338250      23.552338       0.338257       0.333202   -9999.000000       0.236100       0.081800   -9999.000000
57841     57841     hunan          109.6697       26.5697          134       159     2012      05        31        152              0.334125      22.104065       2.174711       0.319140       0.363000   -9999.000000       0.081700   -9999.000000
57841     57841     hunan          109.6697       26.5697          134       159     2012      06        01        153              0.335583      21.006134       3.373222       0.316941       0.370500   -9999.000000       0.083600   -9999.000000
57841     57841     hunan          109.6697       26.5697          134       159     2012      06        02        154              0.330333      19.954041       0.879493       0.316793       0.323000       0.152900   -9999.000000       0.678000
57841     57841     hunan          109.6697       26.5697          134       159     2012      06        03        155              0.325833      20.805664       3.420994       0.311010       0.332000   -9999.000000   -9999.000000       0.559000
57841     57841     hunan          109.6697       26.5697          134       159     2012      06        04        156              0.341792      20.671143       3.994555       0.311098   -9999.000000       0.146900   -9999.000000       0.779000
57841     57841     hunan          109.6697       26.5697          134       159     2012      06        05        157              0.334333      20.597382       4.996716       0.314901   -9999.000000   -9999.000000       0.053600       0.607000
57841     57841     hunan          109.6697       26.5697          134       159     2012      06        06        158              0.341625      21.737823       1.925881       0.310526       0.348500       0.235400       0.057000   -9999.000000
57841     57841     hunan          109.6697       26.5697          134       159     2012      06        07        159              0.334667      23.877869       6.643700       0.312370       0.339000       0.349600       0.048800       0.793000
57841     57841     hunan          109.6697       26.5697          134       159     2012      06        08        160              0.338000      23.944733       6.918796       0.316465       0.321000   -9999.000000   -9999.000000   -9999.000000
57841     57841     hunan          109.6697       26.5697          134       159     2012      06        09        161              0.327917      25.145935       3.467651       0.316721   -9999.000000       0.347700   -9999.000000       0.658000
57841     57841     hunan          109.6697       26.5697          134       159     2012      06        10        162              0.335625      27.492065      23.396778       0.308147   -9999.000000   -9999.000000       0.056900       0.719000
57841     57841     hunan          109.6697       26.5697          134       159     2012      06        11        163              0.000000      26.514435       1.088629       0.346581       0.225000       0.160300       0.099000   -9999.000000
57841     57841     hunan          109.6697       26.5697          134       159     2012      06        12        164              0.328042      24.379272       0.000000       0.317428       0.194500       0.069300       0.094200       0.755000
57841     57841     hunan          109.6697       26.5697          134       159     2012      06        13        165              0.318625      25.155121       0.000000       0.310331       0.186000   -9999.000000   -9999.000000   -9999.000000
57841     57841     hunan          109.6697       26.5697          134       159     2012      06        14        166              0.306042      27.028625       0.159325       0.304511   -9999.000000       0.152700   -9999.000000       0.528000
57841     57841     hunan          109.6697       26.5697          134       159     2012      06        15        167              0.296250      25.258057       0.000000       0.301656   -9999.000000       0.169600   -9999.000000       0.742000
57841     57841     hunan          109.6697       26.5697          134       159     2012      06        16        168              0.282875      26.241913       0.000000       0.297614       0.212000   -9999.000000       0.091100   -9999.000000
57841     57841     hunan          109.6697       26.5697          134       159     2012      06        17        169              0.269708      26.134766       0.391216       0.295036       0.197500       0.338800       0.093100       0.575000
57841     57841     hunan          109.6697       26.5697          134       159     2012      06        18        170              0.256208      26.664551       0.000000       0.293207       0.163000   -9999.000000       0.049800   -9999.000000
57841     57841     hunan          109.6697       26.5697          134       159     2012      06        19        171              0.242042      26.882690       0.000000       0.291162       0.174000       0.183400   -9999.000000       0.431000
57841     57841     hunan          109.6697       26.5697          134       159     2012      06        20        172              0.230833      26.382141       0.000000       0.289573   -9999.000000       0.239500   -9999.000000   -9999.000000
57841     57841     hunan          109.6697       26.5697          134       159     2012      06        21        173              0.220417      27.235718       0.127557       0.287340       0.231000   -9999.000000   -9999.000000       0.573000
57841     57841     hunan          109.6697       26.5697          134       159     2012      06        22        174              0.215458      26.397766       0.326519       0.287695       0.234000       0.251700       0.052600       0.553000
57841     57841     hunan          109.6697       26.5697          134       159     2012      06        23        175              0.211875      25.625824       0.837071       0.287290       0.221500   -9999.000000       0.052800   -9999.000000
57841     57841     hunan          109.6697       26.5697          134       159     2012      06        24        176              0.205833      26.080261       0.605434       0.284702       0.219000       0.298000       0.050700       0.547000
57841     57841     hunan          109.6697       26.5697          134       159     2012      06        25        177              0.208750      26.794342       7.107460       0.283394   -9999.000000   -9999.000000   -9999.000000   -9999.000000
57841     57841     hunan          109.6697       26.5697          134       159     2012      06        26        178              0.255625      26.369476      13.318102       0.296020   -9999.000000   -9999.000000   -9999.000000       0.909000
57841     57841     hunan          109.6697       26.5697          134       159     2012      06        27        179              0.282958      25.567566       9.688248       0.317538       0.227500       0.284000       0.111100       0.787000
57841     57841     hunan          109.6697       26.5697          134       159     2012      06        28        180              0.309000      25.886169       3.207156       0.306988       0.222500   -9999.000000       0.129600   -9999.000000
57841     57841     hunan          109.6697       26.5697          134       159     2012      06        29        181              0.295167      26.928497       0.000000       0.310276       0.208000       0.104500       0.122000       0.740000
57841     57841     hunan          109.6697       26.5697          134       159     2012      06        30        182              0.279917      28.654053       4.687633       0.293036   -9999.000000       0.342500   -9999.000000   -9999.000000
57841     57841     hunan          109.6697       26.5697          134       159     2012      07        01        183              0.273083      29.008942       0.000000       0.295987   -9999.000000   -9999.000000   -9999.000000       0.597000
57841     57841     hunan          109.6697       26.5697          134       159     2012      07        02        184              0.257875      28.113922       0.000000       0.288233       0.306500       0.065200   -9999.000000       0.601000
57841     57841     hunan          109.6697       26.5697          134       159     2012      07        03        185              0.235500      27.695709       0.443228       0.281709       0.293000       0.117800       0.050500       0.454000
57841     57841     hunan          109.6697       26.5697          134       159     2012      07        04        186              0.216792      28.090637       0.000000       0.275952       0.273500   -9999.000000       0.050500       0.566000
57841     57841     hunan          109.6697       26.5697          134       159     2012      07        05        187              0.201167      27.935364       0.000000       0.273653   -9999.000000       0.073300       0.048100   -9999.000000
57841     57841     hunan          109.6697       26.5697          134       159     2012      07        06        188              0.186542      28.232971       1.030578       0.269344   -9999.000000   -9999.000000   -9999.000000       0.568000
57841     57841     hunan          109.6697       26.5697          134       159     2012      07        07        189              0.174167      28.968475       0.194867       0.265102   -9999.000000       0.163500   -9999.000000   -9999.000000
57841     57841     hunan          109.6697       26.5697          134       159     2012      07        08        190              0.165792      28.136627       0.000000       0.262007       0.291500       0.157400       0.048600       0.473000
57841     57841     hunan          109.6697       26.5697          134       159     2012      07        09        191              0.159750      27.840576       0.000000       0.258840       0.261000   -9999.000000       0.102600       0.508000
57841     57841     hunan          109.6697       26.5697          134       159     2012      07        10        192              0.154583      28.290405       0.000000       0.255453       0.263000       0.133600       0.105200   -9999.000000
57841     57841     hunan          109.6697       26.5697          134       159     2012      07        11        193              0.150750      28.455841       0.171565       0.252391   -9999.000000   -9999.000000       0.099700       0.578000
57841     57841     hunan          109.6697       26.5697          134       159     2012      07        12        194              0.146083      29.073364       0.000000       0.248118   -9999.000000       0.075700   -9999.000000   -9999.000000
57841     57841     hunan          109.6697       26.5697          134       159     2012      07        13        195              0.142708      28.556335       0.887936       0.245063       0.359000       0.178300   -9999.000000       0.643000
57841     57841     hunan          109.6697       26.5697          134       159     2012      07        14        196              0.233875      27.593506      47.211449       0.250587   -9999.000000   -9999.000000       0.080000       0.723000
57841     57841     hunan          109.6697       26.5697          134       159     2012      07        15        197              0.274917      27.433685       8.283768       0.337530       0.363000       0.199700       0.110500       0.889000
57841     57841     hunan          109.6697       26.5697          134       159     2012      07        16        198              0.282750      26.601196      10.572482       0.327313   -9999.000000   -9999.000000       0.120200       1.000000
57841     57841     hunan          109.6697       26.5697          134       159     2012      07        17        199              0.311792      27.009216      19.180494       0.314286   -9999.000000       0.062600   -9999.000000   -9999.000000
57841     57841     hunan          109.6697       26.5697          134       159     2012      07        18        200              0.307375      26.112030       0.726882       0.329676       0.385000       0.098700   -9999.000000       0.684000
57841     57841     hunan          109.6697       26.5697          134       159     2012      07        19        201              0.293500      26.757263       0.737766       0.311886       0.346500   -9999.000000   -9999.000000   -9999.000000
57841     57841     hunan          109.6697       26.5697          134       159     2012      07        20        202              0.278125      28.112061       0.000000       0.295523       0.292000       0.136900       0.128100       0.664000
57841     57841     hunan          109.6697       26.5697          134       159     2012      07        21        203              0.257500      29.183014       0.000000       0.287111       0.486000       0.133500       0.130800       0.638000
57841     57841     hunan          109.6697       26.5697          134       159     2012      07        22        204              0.240375      29.382233       4.221446       0.281273   -9999.000000   -9999.000000       0.125500   -9999.000000
57841     57841     hunan          109.6697       26.5697          134       159     2012      07        23        205              0.228458      29.556152       4.788441       0.284488       0.500000       0.225600   -9999.000000       0.610000
57841     57841     hunan          109.6697       26.5697          134       159     2012      07        24        206              0.226458      27.168732       1.351773       0.297283       0.500000   -9999.000000   -9999.000000   -9999.000000
57841     57841     hunan          109.6697       26.5697          134       159     2012      07        25        207              0.227125      26.759155       0.905982       0.292157       0.500000   -9999.000000       0.171300       0.654000
57841     57841     hunan          109.6697       26.5697          134       159     2012      07        26        208              0.226000      27.387665       6.111040       0.286703       0.500000       0.137000       0.165600       0.615000
57841     57841     hunan          109.6697       26.5697          134       159     2012      07        27        209              0.222833      27.804565       3.630795       0.297332   -9999.000000   -9999.000000       0.174100   -9999.000000
57841     57841     hunan          109.6697       26.5697          134       159     2012      07        28        210              0.218625      27.651703       3.547560       0.294878   -9999.000000       0.225400   -9999.000000       0.737000
57841     57841     hunan          109.6697       26.5697          134       159     2012      07        29        211              0.211875      27.556122       1.635931       0.295375       0.500000   -9999.000000   -9999.000000   -9999.000000
57841     57841     hunan          109.6697       26.5697          134       159     2012      07        30        212              0.197875      28.405975       0.135490       0.289355       0.500000       0.083400   -9999.000000       0.537000
57841     57841     hunan          109.6697       26.5697          134       159     2012      07        31        213              0.184292      29.244476       0.939564       0.280610       0.476000       0.266500       0.161300       0.582000
57841     57841     hunan          109.6697       26.5697          134       159     2012      08        01        214              0.173750      28.955933       0.339070       0.278440       0.359000   -9999.000000       0.165900       0.554000
57841     57841     hunan          109.6697       26.5697          134       159     2012      08        02        215              0.171708      29.152863       4.932652       0.273462   -9999.000000       0.136700       0.158000       0.586000
57841     57841     hunan          109.6697       26.5697          134       159     2012      08        03        216              0.173083      28.355164       0.066202       0.286567       0.421000   -9999.000000   -9999.000000   -9999.000000
57841     57841     hunan          109.6697       26.5697          134       159     2012      08        04        217              0.168375      27.970032       5.834680       0.277136       0.370500       0.028600   -9999.000000       0.466000
57841     57841     hunan          109.6697       26.5697          134       159     2012      08        05        218              0.172708      28.038513      10.180079       0.281835       0.432000       0.070300   -9999.000000   -9999.000000
57841     57841     hunan          109.6697       26.5697          134       159     2012      08        06        219              0.179458      27.138580       4.275005       0.307792       0.401000   -9999.000000       0.155300       0.757000
57841     57841     hunan          109.6697       26.5697          134       159     2012      08        07        220              0.188250      26.619232       8.080948       0.300026   -9999.000000       0.063700       0.157200       0.680000
57841     57841     hunan          109.6697       26.5697          134       159     2012      08        08        221              0.197500      27.205475       0.000000       0.307879   -9999.000000   -9999.000000       0.157000   -9999.000000
57841     57841     hunan          109.6697       26.5697          134       159     2012      08        09        222              0.198583      27.912079       0.000000       0.290275       0.381500   -9999.000000   -9999.000000       0.590000
57841     57841     hunan          109.6697       26.5697          134       159     2012      08        10        223              0.193292      28.123596       0.455682       0.281464       0.380000       0.078400   -9999.000000   -9999.000000
57841     57841     hunan          109.6697       26.5697          134       159     2012      08        11        224              0.185917      28.262848       1.276973       0.276404       0.254500   -9999.000000       0.159100       0.548000
57841     57841     hunan          109.6697       26.5697          134       159     2012      08        12        225              0.177000      29.185272       1.774560       0.272140   -9999.000000       0.077200       0.164200       0.682000
57841     57841     hunan          109.6697       26.5697          134       159     2012      08        13        226              0.173792      29.317902       2.317242       0.272952   -9999.000000       0.252300       0.168200       0.621000
57841     57841     hunan          109.6697       26.5697          134       159     2012      08        14        227              0.172750      29.095764       5.181344       0.271435       0.303000   -9999.000000   -9999.000000       0.704000
57841     57841     hunan          109.6697       26.5697          134       159     2012      08        15        228              0.175250      28.604004       0.707788       0.285625       0.276000       0.081400   -9999.000000   -9999.000000
57841     57841     hunan          109.6697       26.5697          134       159     2012      08        16        229              0.170458      29.538300       0.000000       0.274682       0.249000   -9999.000000   -9999.000000       0.401000
57841     57841     hunan          109.6697       26.5697          134       159     2012      08        17        230              0.164522      29.726898       0.765684       0.268176       0.263000       0.026400       0.166900   -9999.000000
57841     57841     hunan          109.6697       26.5697          134       159     2012      08        18        231              0.161792      28.939117       0.445585       0.268029   -9999.000000       0.234700       0.173400       0.593000
57841     57841     hunan          109.6697       26.5697          134       159     2012      08        19        232              0.159125      29.062592       1.818649       0.265605   -9999.000000   -9999.000000       0.159000       0.626000
57841     57841     hunan          109.6697       26.5697          134       159     2012      08        20        233              0.156125      29.472595      10.826563       0.266872       0.270000       0.112500   -9999.000000   -9999.000000
57841     57841     hunan          109.6697       26.5697          134       159     2012      08        21        234              0.151208      29.479462       2.166796       0.260423       0.372000   -9999.000000   -9999.000000       0.691000
57841     57841     hunan          109.6697       26.5697          134       159     2012      08        22        235              0.148583      27.748260       0.264934       0.267947       0.412500       0.096900   -9999.000000   -9999.000000
57841     57841     hunan          109.6697       26.5697          134       159     2012      08        23        236              0.147750      24.808838       0.000000       0.266724   -9999.000000       0.102300       0.130700       0.344000
57841     57841     hunan          109.6697       26.5697          134       159     2012      08        24        237              0.148208      23.696106       0.000000       0.265198   -9999.000000   -9999.000000       0.132400       0.423000
57841     57841     hunan          109.6697       26.5697          134       159     2012      08        25        238              0.000000      24.528442       0.000000       0.263322       0.386500       0.188600       0.128400   -9999.000000
57841     57841     hunan          109.6697       26.5697          134       159     2012      08        26        239              0.147542      25.716553       2.359612       0.261431       0.349500       0.206900   -9999.000000       0.378000
57841     57841     hunan          109.6697       26.5697          134       159     2012      08        27        240              0.145958      26.980042       0.000000       0.257915       0.324000   -9999.000000   -9999.000000   -9999.000000
57841     57841     hunan          109.6697       26.5697          134       159     2012      08        28        241              0.144083      27.124786       0.000000       0.254589       0.305000       0.140800       0.138600       0.387000
57841     57841     hunan          109.6697       26.5697          134       159     2012      08        29        242              0.141333      27.649017       0.421860       0.251141   -9999.000000   -9999.000000       0.142800       0.542000
57841     57841     hunan          109.6697       26.5697          134       159     2012      08        30        243              0.140833      27.739990       0.472372       0.251267       0.404000       0.258900       0.137400       0.430000
57841     57841     hunan          109.6697       26.5697          134       159     2012      08        31        244              0.139042      28.384247       6.202477       0.248956       0.390500       0.297500   -9999.000000       0.625000
57841     57841     hunan          109.6697       26.5697          134       159     2012      09        01        245              0.138125      28.247192       0.275354       0.267240       0.330000   -9999.000000   -9999.000000   -9999.000000
57841     57841     hunan          109.6697       26.5697          134       159     2012      09        02        246              0.135875      28.603699       6.188715       0.261667       0.299000       0.278500   -9999.000000       0.433000
57841     57841     hunan          109.6697       26.5697          134       159     2012      09        03        247              0.225042      27.985260      21.261322       0.267296   -9999.000000   -9999.000000       0.132800   -9999.000000
57841     57841     hunan          109.6697       26.5697          134       159     2012      09        04        248              0.250167      23.474457       0.000000       0.320926   -9999.000000       0.068500       0.135900       0.429000
57841     57841     hunan          109.6697       26.5697          134       159     2012      09        05        249              0.243000      24.993042       1.612892       0.291473       0.324000       0.178500       0.127000       0.603000
57841     57841     hunan          109.6697       26.5697          134       159     2012      09        06        250              0.231333      26.209137       0.000000       0.280482       0.321000   -9999.000000   -9999.000000   -9999.000000
57841     57841     hunan          109.6697       26.5697          134       159     2012      09        07        251              0.219542      26.653809       1.106919       0.274189       0.323000       0.062900   -9999.000000       0.516000
57841     57841     hunan          109.6697       26.5697          134       159     2012      09        08        252              0.207375      27.485046       1.631604       0.269088   -9999.000000   -9999.000000       0.133700   -9999.000000
57841     57841     hunan          109.6697       26.5697          134       159     2012      09        09        253              0.198167      26.957550       0.722744       0.272599   -9999.000000       0.080300       0.135100       0.460000
57841     57841     hunan          109.6697       26.5697          134       159     2012      09        10        254              0.188583      27.493317       0.801374       0.265372       0.360000       0.143500       0.142600       0.562000
57841     57841     hunan          109.6697       26.5697          134       159     2012      09        11        255              0.179333      27.529907       0.000000       0.261602       0.196500   -9999.000000       0.133000   -9999.000000
57841     57841     hunan          109.6697       26.5697          134       159     2012      09        12        256              0.185500      26.885925      24.430094       0.257746       0.139000       0.095100   -9999.000000       0.767000
57841     57841     hunan          109.6697       26.5697          134       159     2012      09        13        257              0.256167      25.906219       5.198802       0.294204   -9999.000000   -9999.000000   -9999.000000   -9999.000000
57841     57841     hunan          109.6697       26.5697          134       159     2012      09        14        258              0.266292      21.270020       0.000000       0.310691   -9999.000000   -9999.000000       0.138600       0.293000
57841     57841     hunan          109.6697       26.5697          134       159     2012      09        15        259              0.255333      22.343323       0.000000       0.289380   -9999.000000       0.240700       0.141000   -9999.000000
57841     57841     hunan          109.6697       26.5697          134       159     2012      09        16        260              0.246833      22.192719       4.632964       0.280251       0.227000   -9999.000000       0.129500       0.654000
57841     57841     hunan          109.6697       26.5697          134       159     2012      09        17        261              0.247417      20.295441       0.709467       0.289864       0.208000       0.145000   -9999.000000       0.542000
57841     57841     hunan          109.6697       26.5697          134       159     2012      09        18        262              0.244583      21.182861       1.431924       0.282780       0.191500   -9999.000000   -9999.000000   -9999.000000
57841     57841     hunan          109.6697       26.5697          134       159     2012      09        19        263              0.237750      22.134644       0.390581       0.276782   -9999.000000   -9999.000000   -9999.000000       0.324000
57841     57841     hunan          109.6697       26.5697          134       159     2012      09        20        264              0.237208      23.080811       7.266142       0.271723   -9999.000000       0.084800       0.097100   -9999.000000
57841     57841     hunan          109.6697       26.5697          134       159     2012      09        21        265              0.279833      21.745514      14.964117       0.291176   -9999.000000   -9999.000000       0.103000       0.951000
57841     57841     hunan          109.6697       26.5697          134       159     2012      09        22        266              0.290375      21.587830       1.960479       0.315725       0.233000       0.186700       0.097400       0.838000
57841     57841     hunan          109.6697       26.5697          134       159     2012      09        23        267              0.301333      21.637909      23.508146       0.302294       0.238000       0.140000   -9999.000000   -9999.000000
57841     57841     hunan          109.6697       26.5697          134       159     2012      09        24        268              0.294917      20.833893       1.576988       0.328856       0.236000   -9999.000000   -9999.000000       0.748000
57841     57841     hunan          109.6697       26.5697          134       159     2012      09        25        269              0.289167      21.228149       0.255506       0.308219   -9999.000000       0.302300       0.129100   -9999.000000
57841     57841     hunan          109.6697       26.5697          134       159     2012      09        26        270              0.283125      22.252869       0.000000       0.297031       0.226000   -9999.000000       0.132600       0.545000
57841     57841     hunan          109.6697       26.5697          134       159     2012      09        27        271              0.279286      22.661133       0.481197       0.290633       0.210000       0.070300       0.122400       0.719000
57841     57841     hunan          109.6697       26.5697          134       159     2012      09        28        272              0.274333      22.192841       0.000000       0.288066       0.199500   -9999.000000   -9999.000000       0.418000
57841     57841     hunan          109.6697       26.5697          134       159     2012      09        29        273              0.267125      22.076813       0.000000       0.282096       0.190500   -9999.000000   -9999.000000       0.630000
57841     57841     hunan          109.6697       26.5697          134       159     2012      09        30        274              0.256542      21.275208       0.000000       0.276646   -9999.000000       0.155100   -9999.000000   -9999.000000
57841     57841     hunan          109.6697       26.5697          134       159     2012      10        01        275              0.245375      21.099792       0.000000       0.273206   -9999.000000   -9999.000000       0.118700       0.376000
57841     57841     hunan          109.6697       26.5697          134       159     2012      10        02        276              0.235708      21.448364       0.104154       0.270620       0.136000   -9999.000000       0.125200   -9999.000000
57841     57841     hunan          109.6697       26.5697          134       159     2012      10        03        277              0.229542      22.141418       2.528834       0.268456       0.148500       0.286300       0.126100       0.488000
57841     57841     hunan          109.6697       26.5697          134       159     2012      10        04        278              0.229875      20.092926       4.651081       0.275290       0.161500   -9999.000000   -9999.000000       0.556000
57841     57841     hunan          109.6697       26.5697          134       159     2012      10        05        279              0.239917      18.973511       3.071864       0.289101   -9999.000000       0.089300   -9999.000000   -9999.000000
57841     57841     hunan          109.6697       26.5697          134       159     2012      10        06        280              0.260542      18.396545       0.071700       0.290944   -9999.000000       0.190700   -9999.000000       0.610000
57841     57841     hunan          109.6697       26.5697          134       159     2012      10        07        281              0.267083      18.172424       0.062765       0.286869       0.159000   -9999.000000       0.126200   -9999.000000
57841     57841     hunan          109.6697       26.5697          134       159     2012      10        08        282              0.266667      19.071716       1.094769       0.282389       0.154500       0.117000       0.100700       0.508000
57841     57841     hunan          109.6697       26.5697          134       159     2012      10        09        283              0.268958      19.717377       0.854298       0.280969       0.139500   -9999.000000       0.092300       0.743000
57841     57841     hunan          109.6697       26.5697          134       159     2012      10        10        284              0.271167      18.777222       0.000000       0.284470       0.138000       0.022300   -9999.000000   -9999.000000
57841     57841     hunan          109.6697       26.5697          134       159     2012      10        11        285              0.266875      20.226593       0.000000       0.278155   -9999.000000       0.148000   -9999.000000       0.451000
57841     57841     hunan          109.6697       26.5697          134       159     2012      10        12        286              0.260833      20.882690       0.000000       0.273932   -9999.000000   -9999.000000       0.094500   -9999.000000
57841     57841     hunan          109.6697       26.5697          134       159     2012      10        13        287              0.253125      20.826965       0.000000       0.271538       0.209500       0.106400       0.093500       0.201000
57841     57841     hunan          109.6697       26.5697          134       159     2012      10        14        288              0.247708      19.005554       0.992621       0.271348       0.213000   -9999.000000       0.095700   -9999.000000
57841     57841     hunan          109.6697       26.5697          134       159     2012      10        15        289              0.246167      18.149078       0.000000       0.272263       0.188000       0.182900   -9999.000000       0.454000
57841     57841     hunan          109.6697       26.5697          134       159     2012      10        16        290              0.255875      19.200592       7.981985       0.272350   -9999.000000       0.368300   -9999.000000       0.439000
57841     57841     hunan          109.6697       26.5697          134       159     2012      10        17        291              0.274917      18.645630       0.000000       0.294268   -9999.000000   -9999.000000   -9999.000000   -9999.000000
57841     57841     hunan          109.6697       26.5697          134       159     2012      10        18        292              0.270792      18.565857       0.000000       0.282709       0.191500       0.427300       0.119800       0.352000
57841     57841     hunan          109.6697       26.5697          134       159     2012      10        19        293              0.266000      18.736969       0.786339       0.277179       0.192000   -9999.000000       0.120600   -9999.000000
57841     57841     hunan          109.6697       26.5697          134       159     2012      10        20        294              0.262583      19.406860       0.000000       0.275504       0.168500       0.058600       0.116900       0.508000
57841     57841     hunan          109.6697       26.5697          134       159     2012      10        21        295              0.258625      21.107147       0.431877       0.273432       0.198000       0.338400   -9999.000000       0.475000
57841     57841     hunan          109.6697       26.5697          134       159     2012      10        22        296              0.283208      21.915741       8.740448       0.272107   -9999.000000   -9999.000000   -9999.000000   -9999.000000
57841     57841     hunan          109.6697       26.5697          134       159     2012      10        23        297              0.285750      18.450958       0.470895       0.300376   -9999.000000       0.305100   -9999.000000       0.318000
57841     57841     hunan          109.6697       26.5697          134       159     2012      10        24        298              0.280792      17.811035       0.000000       0.284238   -9999.000000       0.068400       0.080600   -9999.000000
57841     57841     hunan          109.6697       26.5697          134       159     2012      10        25        299              0.000000      16.660980       0.000000       0.280672       0.199000   -9999.000000       0.081200       0.438000
57841     57841     hunan          109.6697       26.5697          134       159     2012      10        26        300              0.274792      18.208496       0.714019       0.277808       0.189000   -9999.000000       0.077300       0.474000
57841     57841     hunan          109.6697       26.5697          134       159     2012      10        27        301              0.269792      20.045105       2.437074       0.274755   -9999.000000   -9999.000000   -9999.000000       0.303000
57841     57841     hunan          109.6697       26.5697          134       159     2012      10        28        302              0.000000      18.745026      11.461331       0.277184   -9999.000000       0.206000   -9999.000000       0.588000
57841     57841     hunan          109.6697       26.5697          134       159     2012      10        29        303              0.316750      18.929993      19.077635       0.302770       0.253000       0.269900       0.133500   -9999.000000
57841     57841     hunan          109.6697       26.5697          134       159     2012      10        30        304              0.306042      19.109467       0.348364       0.323595       0.213500   -9999.000000       0.128300       0.411000
57841     57841     hunan          109.6697       26.5697          134       159     2012      10        31        305              0.295500      17.115692       0.000000       0.307045       0.191000       0.209700       0.127600   -9999.000000
57841     57841     hunan          109.6697       26.5697          134       159     2012      11        01        306              0.288458      17.097321       0.000000       0.294441   -9999.000000   -9999.000000   -9999.000000       0.245000
57841     57841     hunan          109.6697       26.5697          134       159     2012      11        02        307              0.282833      16.630676       0.000000       0.288897   -9999.000000       0.226200   -9999.000000       0.450000
57841     57841     hunan          109.6697       26.5697          134       159     2012      11        03        308              0.280292      17.638672       2.503519       0.283956       0.210000       0.214200   -9999.000000   -9999.000000
57841     57841     hunan          109.6697       26.5697          134       159     2012      11        04        309              0.281333      16.222595       1.158603       0.289861       0.190500   -9999.000000       0.126500       0.296000
57841     57841     hunan          109.6697       26.5697          134       159     2012      11        05        310              0.278500      16.306610       1.933765       0.282275       0.195500       0.359100       0.113100   -9999.000000
57841     57841     hunan          109.6697       26.5697          134       159     2012      11        06        311              0.293458      14.584442      21.840067       0.285432       0.214000   -9999.000000       0.112200       0.562000
57841     57841     hunan          109.6697       26.5697          134       159     2012      11        07        312              0.326167      14.452362      19.375349       0.313782   -9999.000000       0.247500   -9999.000000       0.737000
57841     57841     hunan          109.6697       26.5697          134       159     2012      11        08        313              0.318636      13.627777       4.488998       0.334396   -9999.000000       0.209200   -9999.000000       0.619000
57841     57841     hunan          109.6697       26.5697          134       159     2012      11        09        314              0.316083      13.050903       3.088643       0.318480       0.245000   -9999.000000       0.122700       0.565000
57841     57841     hunan          109.6697       26.5697          134       159     2012      11        10        315              0.312250      12.862732       0.000000       0.309159       0.217500       0.163800       0.111900   -9999.000000
57841     57841     hunan          109.6697       26.5697          134       159     2012      11        11        316              0.302417      13.046814       0.000000       0.301084       0.146500       0.028100       0.114700       0.197000
57841     57841     hunan          109.6697       26.5697          134       159     2012      11        12        317              0.296167      14.177094       0.000000       0.294120   -9999.000000   -9999.000000       0.110800   -9999.000000
57841     57841     hunan          109.6697       26.5697          134       159     2012      11        13        318              0.000000      12.980774       0.000000       0.291801   -9999.000000       0.394300   -9999.000000       0.442000
57841     57841     hunan          109.6697       26.5697          134       159     2012      11        14        319              0.289292      14.475861       0.904102       0.289508       0.167000   -9999.000000   -9999.000000       0.438000
57841     57841     hunan          109.6697       26.5697          134       159     2012      11        15        320              0.293208      15.891113      14.192745       0.289667       0.187500       0.242500       0.115900   -9999.000000
57841     57841     hunan          109.6697       26.5697          134       159     2012      11        16        321              0.328667      13.783478      19.112848       0.308143       0.167000       0.372200       0.116100       0.384000
57841     57841     hunan          109.6697       26.5697          134       159     2012      11        17        322              0.000000      11.334137       0.000000       0.334084       0.137000   -9999.000000       0.114100   -9999.000000
57841     57841     hunan          109.6697       26.5697          134       159     2012      11        18        323              0.303000      10.834106       0.000000       0.307277   -9999.000000       0.221400   -9999.000000       0.267000
57841     57841     hunan          109.6697       26.5697          134       159     2012      11        19        324              0.298667      11.350647       0.000000       0.300470       0.168000   -9999.000000   -9999.000000       0.291000
57841     57841     hunan          109.6697       26.5697          134       159     2012      11        20        325              0.295000      11.666992       1.573151       0.297726       0.181500       0.184500   -9999.000000   -9999.000000
57841     57841     hunan          109.6697       26.5697          134       159     2012      11        21        326              0.295458      11.813080       0.943765       0.298571       0.154500       0.206200       0.081400       0.364000
57841     57841     hunan          109.6697       26.5697          134       159     2012      11        22        327              0.299174      11.653046       1.781397       0.299979       0.151500   -9999.000000       0.078800   -9999.000000
57841     57841     hunan          109.6697       26.5697          134       159     2012      11        23        328              0.300565      11.024353       0.155005       0.301144   -9999.000000       0.267600       0.075400       0.300000
57841     57841     hunan          109.6697       26.5697          134       159     2012      11        24        329              0.296625      10.532654       0.000000       0.297347   -9999.000000   -9999.000000   -9999.000000       0.174000
57841     57841     hunan          109.6697       26.5697          134       159     2012      11        25        330              0.293292      10.004242       0.150643       0.295254       0.159500       0.244000   -9999.000000       0.182000
57841     57841     hunan          109.6697       26.5697          134       159     2012      11        26        331              0.291375       9.412140       0.000000       0.294820       0.141500       0.171900   -9999.000000       0.444000
57841     57841     hunan          109.6697       26.5697          134       159     2012      11        27        332              0.288042      10.391846       0.218216       0.292922       0.147000   -9999.000000       0.076100   -9999.000000
57841     57841     hunan          109.6697       26.5697          134       159     2012      11        28        333              0.285417       9.683746       0.000000       0.292831   -9999.000000       0.253300       0.078200       0.281000
57841     57841     hunan          109.6697       26.5697          134       159     2012      11        29        334              0.282708      10.620850       3.173754       0.292073   -9999.000000       0.041700   -9999.000000   -9999.000000
57841     57841     hunan          109.6697       26.5697          134       159     2012      11        30        335              0.293500       9.626007       7.134559       0.297620       0.171000   -9999.000000   -9999.000000       0.298000
57841     57841     hunan          109.6697       26.5697          134       159     2012      12        01        336              0.317375       8.397583       1.532057       0.307362       0.159000       0.171900   -9999.000000       0.460000
57841     57841     hunan          109.6697       26.5697          134       159     2012      12        02        337              0.308833       8.421295       0.000000       0.306352       0.127000   -9999.000000       0.073700   -9999.000000
57841     57841     hunan          109.6697       26.5697          134       159     2012      12        03        338              0.303333       8.856110       0.463343       0.298090       0.143000       0.128700       0.076200       0.268000
57841     57841     hunan          109.6697       26.5697          134       159     2012      12        04        339              0.298750       9.495789       0.000000       0.294936   -9999.000000       0.280600       0.076300   -9999.000000
57841     57841     hunan          109.6697       26.5697          134       159     2012      12        05        340              0.294750       8.419128       0.000000       0.293603   -9999.000000   -9999.000000   -9999.000000       0.112000
57841     57841     hunan          109.6697       26.5697          134       159     2012      12        06        341              0.290958       9.758026       0.000000       0.291588       0.144000       0.236900   -9999.000000       0.351000
57841     57841     hunan          109.6697       26.5697          134       159     2012      12        07        342              0.287292      10.165741       0.000000       0.290383       0.135000   -9999.000000   -9999.000000       0.297000
57841     57841     hunan          109.6697       26.5697          134       159     2012      12        08        343              0.284667       9.572113       0.063658       0.290236       0.137500       0.144400       0.075600       0.300000
57841     57841     hunan          109.6697       26.5697          134       159     2012      12        09        344              0.286500      11.242126      13.437469       0.289249   -9999.000000       0.331500       0.084200   -9999.000000
57841     57841     hunan          109.6697       26.5697          134       159     2012      12        10        345              0.318458       8.530457       5.328739       0.311145   -9999.000000   -9999.000000       0.061100       0.248000
57841     57841     hunan          109.6697       26.5697          134       159     2012      12        11        346              0.311708       6.737610       1.717436       0.315064       0.188000       0.233700   -9999.000000   -9999.000000
57841     57841     hunan          109.6697       26.5697          134       159     2012      12        12        347              0.310417       6.908478       1.640413       0.303242       0.183000   -9999.000000   -9999.000000       0.492000
57841     57841     hunan          109.6697       26.5697          134       159     2012      12        13        348              0.308417       7.082855       0.000000       0.303287       0.149000       0.215300       0.055100       0.461000
57841     57841     hunan          109.6697       26.5697          134       159     2012      12        14        349              0.303417      11.874207       0.000000       0.299057       0.150000       0.281900       0.061600   -9999.000000
57841     57841     hunan          109.6697       26.5697          134       159     2012      12        15        350              0.000000      13.559906       0.064925       0.294773   -9999.000000   -9999.000000       0.060400       0.188000
57841     57841     hunan          109.6697       26.5697          134       159     2012      12        16        351              0.295000       8.718750       0.138378       0.293696       0.193000       0.118700   -9999.000000   -9999.000000
57841     57841     hunan          109.6697       26.5697          134       159     2012      12        17        352              0.299208       8.050659       3.146320       0.293347       0.193500   -9999.000000   -9999.000000       0.244000
57841     57841     hunan          109.6697       26.5697          134       159     2012      12        18        353              0.305952       7.074829       0.000000       0.299488       0.176000   -9999.000000   -9999.000000       0.192000
57841     57841     hunan          109.6697       26.5697          134       159     2012      12        19        354              0.302957       6.428680       3.244363       0.295881       0.189500       0.227000       0.058600   -9999.000000
57841     57841     hunan          109.6697       26.5697          134       159     2012      12        20        355              0.000000       5.970428       4.127045       0.299019   -9999.000000   -9999.000000       0.057800       0.315000
57841     57841     hunan          109.6697       26.5697          134       159     2012      12        21        356              0.315458       5.257172       0.362347       0.306489   -9999.000000       0.275100       0.055400   -9999.000000
57841     57841     hunan          109.6697       26.5697          134       159     2012      12        22        357              0.308875       4.850494       0.791432       0.299249       0.145500       0.133600   -9999.000000       0.197000
57841     57841     hunan          109.6697       26.5697          134       159     2012      12        23        358              0.303833       5.105560       0.000000       0.295896       0.131000   -9999.000000   -9999.000000       0.197000
57841     57841     hunan          109.6697       26.5697          134       159     2012      12        24        359              0.299000       5.586334       0.000000       0.293876       0.125000       0.282200       0.068700       0.127000
57841     57841     hunan          109.6697       26.5697          134       159     2012      12        25        360              0.296500       6.541382       3.512705       0.292122   -9999.000000   -9999.000000       0.068700       0.166000
57841     57841     hunan          109.6697       26.5697          134       159     2012      12        26        361              0.000000       5.005554       9.533493       0.297468   -9999.000000   -9999.000000       0.075800   -9999.000000
57841     57841     hunan          109.6697       26.5697          134       159     2012      12        27        362              0.321583       3.165375       0.210163       0.302106   -9999.000000   -9999.000000       0.067400       0.398000
57841     57841     hunan          109.6697       26.5697          134       159     2012      12        28        363              0.000000       3.146759       9.665046       0.310466       0.155500   -9999.000000   -9999.000000   -9999.000000
57841     57841     hunan          109.6697       26.5697          134       159     2012      12        29        364              0.000000       3.427063       2.508743       0.307380   -9999.000000   -9999.000000   -9999.000000       0.208000
57841     57841     hunan          109.6697       26.5697          134       159     2012      12        30        365              0.000000       2.975037       0.157512       0.314016   -9999.000000   -9999.000000       0.063800       0.324000
57841     57841     hunan          109.6697       26.5697          134       159     2012      12        31        366              0.307200       3.465363       0.000000       0.309778   -9999.000000       0.167400       0.066700   -9999.000000
