# Supplementary material for: Research on Fusing Multisatellite Soil Moisture Data Based on Bayesian Model Averaging
Source: Hindawi journal article supplement (doi:10.1155/2018/9310838), 2018-06-25
Supplement: f1 [file 9310838.f1.zip › 2012_sm00-10cm_daily_ZDB_ZHY_57865_366days_allin.txt]

57865     57865     hunan          111.5800       26.4500          134       166     2012      01        01        001              0.000000   -9999.000000       2.765969   -9999.000000       0.139500   -9999.000000       0.081600   -9999.000000
57865     57865     hunan          111.5800       26.4500          134       166     2012      01        02        002              0.321368       4.944336       5.308864       0.312234       0.149000       0.117000   -9999.000000       0.376000
57865     57865     hunan          111.5800       26.4500          134       166     2012      01        03        003              0.000000       4.944000       4.436638       0.312446   -9999.000000   -9999.000000   -9999.000000       0.405000
57865     57865     hunan          111.5800       26.4500          134       166     2012      01        04        004              0.365000       2.979919       0.981124       0.306850   -9999.000000       0.184200       0.067300   -9999.000000
57865     57865     hunan          111.5800       26.4500          134       166     2012      01        05        005              0.369458       2.995453       3.896437       0.299503   -9999.000000   -9999.000000       0.072100       0.288000
57865     57865     hunan          111.5800       26.4500          134       166     2012      01        06        006              0.364333       1.919189       0.439259       0.295401   -9999.000000   -9999.000000       0.074000   -9999.000000
57865     57865     hunan          111.5800       26.4500          134       166     2012      01        07        007              0.360042       2.680298       0.167846       0.297141       0.156000   -9999.000000       0.073700       0.232000
57865     57865     hunan          111.5800       26.4500          134       166     2012      01        08        008              0.000000       3.420746       0.000000       0.297114       0.143000   -9999.000000   -9999.000000   -9999.000000
57865     57865     hunan          111.5800       26.4500          134       166     2012      01        09        009              0.355333       3.469788       0.105552       0.295035   -9999.000000       0.189800   -9999.000000       0.284000
57865     57865     hunan          111.5800       26.4500          134       166     2012      01        10        010              0.353250       4.591400       0.000000       0.293512       0.166000       0.118800       0.061500       0.235000
57865     57865     hunan          111.5800       26.4500          134       166     2012      01        11        011              0.351125       4.879883       0.000000       0.291874       0.116500   -9999.000000       0.058000   -9999.000000
57865     57865     hunan          111.5800       26.4500          134       166     2012      01        12        012              0.349542       4.473572       0.208424       0.291270       0.109500       0.258200       0.064200       0.192000
57865     57865     hunan          111.5800       26.4500          134       166     2012      01        13        013              0.353708       4.420013       9.575115       0.290842       0.110000       0.244200   -9999.000000   -9999.000000
57865     57865     hunan          111.5800       26.4500          134       166     2012      01        14        014              0.379542       4.701813      30.350325       0.297436   -9999.000000   -9999.000000   -9999.000000       0.628000
57865     57865     hunan          111.5800       26.4500          134       166     2012      01        15        015              0.372792       4.178223      11.509419       0.327372   -9999.000000   -9999.000000   -9999.000000       0.751000
57865     57865     hunan          111.5800       26.4500          134       166     2012      01        16        016              0.363375       3.568207       0.000000       0.319268   -9999.000000   -9999.000000       0.059400   -9999.000000
57865     57865     hunan          111.5800       26.4500          134       166     2012      01        17        017              0.000000       3.821442       5.032714       0.310220       0.127500       0.219500       0.059500       0.413000
57865     57865     hunan          111.5800       26.4500          134       166     2012      01        18        018              0.374083       4.309875       2.388870       0.311098   -9999.000000       0.169400       0.070600   -9999.000000
57865     57865     hunan          111.5800       26.4500          134       166     2012      01        19        019              0.369542       3.875671       0.236511       0.310518   -9999.000000   -9999.000000   -9999.000000       0.496000
57865     57865     hunan          111.5800       26.4500          134       166     2012      01        20        020              0.370250       3.994537       0.606324       0.304759   -9999.000000       0.095500   -9999.000000       0.597000
57865     57865     hunan          111.5800       26.4500          134       166     2012      01        21        021              0.372333       3.727448       1.740382       0.302662   -9999.000000   -9999.000000       0.060400       0.516000
57865     57865     hunan          111.5800       26.4500          134       166     2012      01        22        022              0.371208       2.723846       0.492946       0.297569   -9999.000000   -9999.000000       0.062200       0.427000
57865     57865     hunan          111.5800       26.4500          134       166     2012      01        23        023              0.365208       1.425629       0.757142       0.274658   -9999.000000       0.127400       0.068400   -9999.000000
57865     57865     hunan          111.5800       26.4500          134       166     2012      01        24        024              0.367167       1.175140       0.269778       0.257055   -9999.000000   -9999.000000   -9999.000000       0.411000
57865     57865     hunan          111.5800       26.4500          134       166     2012      01        25        025              0.362500       1.131836       1.047835       0.244060   -9999.000000       0.316600   -9999.000000   -9999.000000
57865     57865     hunan          111.5800       26.4500          134       166     2012      01        26        026              0.360042       2.709961       0.318132       0.270496   -9999.000000   -9999.000000   -9999.000000       0.256000
57865     57865     hunan          111.5800       26.4500          134       166     2012      01        27        027              0.363333       1.899506       0.457911       0.268867       0.130000   -9999.000000       0.063400       0.349000
57865     57865     hunan          111.5800       26.4500          134       166     2012      01        28        028              0.367208       2.233459       0.169454       0.270430   -9999.000000       0.442500       0.053600   -9999.000000
57865     57865     hunan          111.5800       26.4500          134       166     2012      01        29        029              0.363042       3.342468       0.226410       0.278783       0.117000   -9999.000000       0.063200       0.419000
57865     57865     hunan          111.5800       26.4500          134       166     2012      01        30        030              0.360167       4.608215       0.000000       0.287151   -9999.000000       0.053500   -9999.000000   -9999.000000
57865     57865     hunan          111.5800       26.4500          134       166     2012      01        31        031              0.359750       3.967346       0.000000       0.287525       0.136000   -9999.000000   -9999.000000       0.150000
57865     57865     hunan          111.5800       26.4500          134       166     2012      02        01        032              0.357542       7.337708       1.297401       0.287927       0.133500   -9999.000000   -9999.000000       0.274000
57865     57865     hunan          111.5800       26.4500          134       166     2012      02        02        033              0.371250       5.790161       8.542747       0.290157   -9999.000000       0.169100       0.081500   -9999.000000
57865     57865     hunan          111.5800       26.4500          134       166     2012      02        03        034              0.369833       2.753296       0.408761       0.299015       0.141000   -9999.000000       0.083700       0.380000
57865     57865     hunan          111.5800       26.4500          134       166     2012      02        04        035              0.366167       3.111694       0.361588       0.297332   -9999.000000       0.195600       0.085100   -9999.000000
57865     57865     hunan          111.5800       26.4500          134       166     2012      02        05        036              0.370875       4.104950       6.291137       0.291694   -9999.000000       0.514900   -9999.000000       0.553000
57865     57865     hunan          111.5800       26.4500          134       166     2012      02        06        037              0.373250       4.740784       0.214588       0.299780       0.136000   -9999.000000   -9999.000000   -9999.000000
57865     57865     hunan          111.5800       26.4500          134       166     2012      02        07        038              0.366375       4.992004       0.000000       0.295584   -9999.000000       0.129400       0.052900       0.297000
57865     57865     hunan          111.5800       26.4500          134       166     2012      02        08        039              0.362542       4.663025       0.000000       0.289638   -9999.000000   -9999.000000       0.057600       0.349000
57865     57865     hunan          111.5800       26.4500          134       166     2012      02        09        040              0.364292       2.600281       1.102132       0.280094   -9999.000000       0.065700       0.059700   -9999.000000
57865     57865     hunan          111.5800       26.4500          134       166     2012      02        10        041              0.369417       1.885437       0.246690       0.268990   -9999.000000       0.310000       0.063800       0.215000
57865     57865     hunan          111.5800       26.4500          134       166     2012      02        11        042              0.364583       1.937683       0.089261       0.264322       0.166000   -9999.000000   -9999.000000   -9999.000000
57865     57865     hunan          111.5800       26.4500          134       166     2012      02        12        043              0.364083       3.175140       1.453323       0.275061       0.165000       0.339800   -9999.000000       0.425000
57865     57865     hunan          111.5800       26.4500          134       166     2012      02        13        044              0.371792       3.443848       1.304583       0.286539       0.162000   -9999.000000   -9999.000000       0.466000
57865     57865     hunan          111.5800       26.4500          134       166     2012      02        14        045              0.370125       4.673248       0.065175       0.290835       0.135000       0.131200       0.075800   -9999.000000
57865     57865     hunan          111.5800       26.4500          134       166     2012      02        15        046              0.368208       4.825623       0.584038       0.288584   -9999.000000       0.153500       0.083100       0.320000
57865     57865     hunan          111.5800       26.4500          134       166     2012      02        16        047              0.366417       4.137177       0.126330       0.287551   -9999.000000   -9999.000000   -9999.000000   -9999.000000
57865     57865     hunan          111.5800       26.4500          134       166     2012      02        17        048              0.363250       4.181122       0.353067       0.285956       0.134000       0.088000   -9999.000000       0.330000
57865     57865     hunan          111.5800       26.4500          134       166     2012      02        18        049              0.361000       4.321411       0.000000       0.285814       0.111000   -9999.000000   -9999.000000       0.344000
57865     57865     hunan          111.5800       26.4500          134       166     2012      02        19        050              0.358958       4.082214       0.000000       0.282628       0.121000   -9999.000000       0.073000       0.274000
57865     57865     hunan          111.5800       26.4500          134       166     2012      02        20        051              0.356417       7.536072       0.369497       0.282031   -9999.000000       0.120400       0.053400       0.338000
57865     57865     hunan          111.5800       26.4500          134       166     2012      02        21        052              0.355250       9.244751       0.242534       0.282040   -9999.000000   -9999.000000   -9999.000000   -9999.000000
57865     57865     hunan          111.5800       26.4500          134       166     2012      02        22        053              0.355750       9.079193       2.846540       0.281606       0.114500       0.186200   -9999.000000       0.399000
57865     57865     hunan          111.5800       26.4500          134       166     2012      02        23        054              0.378375       9.598480       2.856270       0.284981       0.107500       0.600800   -9999.000000   -9999.000000
57865     57865     hunan          111.5800       26.4500          134       166     2012      02        24        055              0.374000       8.890991       1.295548       0.291948       0.115000   -9999.000000       0.051600       0.403000
57865     57865     hunan          111.5800       26.4500          134       166     2012      02        25        056              0.370250       7.015167       0.609190       0.287673   -9999.000000       0.101800       0.055600       0.339000
57865     57865     hunan          111.5800       26.4500          134       166     2012      02        26        057              0.367875       4.792023       1.018685       0.283443   -9999.000000   -9999.000000       0.049900   -9999.000000
57865     57865     hunan          111.5800       26.4500          134       166     2012      02        27        058              0.372875       3.455963       1.299713       0.279986   -9999.000000       0.145900   -9999.000000       0.432000
57865     57865     hunan          111.5800       26.4500          134       166     2012      02        28        059              0.375042       3.683563       0.353441       0.279748       0.116500   -9999.000000   -9999.000000   -9999.000000
57865     57865     hunan          111.5800       26.4500          134       166     2012      02        29        060              0.000000   -9999.000000       0.076448   -9999.000000       0.111500   -9999.000000   -9999.000000   -9999.000000
57865     57865     hunan          111.5800       26.4500          134       166     2012      03        01        061              0.372250       5.108307       0.420379       0.281478   -9999.000000       0.442800       0.057900       0.404000
57865     57865     hunan          111.5800       26.4500          134       166     2012      03        02        062              0.376500       6.064087       0.654099       0.282501   -9999.000000   -9999.000000       0.054900   -9999.000000
57865     57865     hunan          111.5800       26.4500          134       166     2012      03        03        063              0.378875       5.812836       1.252140       0.282102       0.211000       0.544500       0.058100       0.533000
57865     57865     hunan          111.5800       26.4500          134       166     2012      03        04        064              0.390875       6.129700      28.835552       0.284436   -9999.000000       0.413000   -9999.000000   -9999.000000
57865     57865     hunan          111.5800       26.4500          134       166     2012      03        05        065              0.374208       5.375977       0.000000       0.321805       0.196000   -9999.000000   -9999.000000       0.433000
57865     57865     hunan          111.5800       26.4500          134       166     2012      03        06        066              0.379708       7.212982       4.494982       0.300226       0.209000       0.182500   -9999.000000   -9999.000000
57865     57865     hunan          111.5800       26.4500          134       166     2012      03        07        067              0.000000       6.287872       0.060781       0.298847   -9999.000000   -9999.000000       0.066700       0.366000
57865     57865     hunan          111.5800       26.4500          134       166     2012      03        08        068              0.375125       6.473816       2.433666       0.292333       0.234000   -9999.000000       0.056300       0.604000
57865     57865     hunan          111.5800       26.4500          134       166     2012      03        09        069              0.372833       6.078400       0.215523       0.291958       0.212500       0.129200       0.061400   -9999.000000
57865     57865     hunan          111.5800       26.4500          134       166     2012      03        10        070              0.367958       5.246887       0.000000       0.291789       0.137000   -9999.000000   -9999.000000       0.271000
57865     57865     hunan          111.5800       26.4500          134       166     2012      03        11        071              0.364708       7.436768       0.000000       0.287754       0.104000       0.171100   -9999.000000   -9999.000000
57865     57865     hunan          111.5800       26.4500          134       166     2012      03        12        072              0.361250       9.205719       0.000000       0.285938   -9999.000000       0.516700       0.056100       0.416000
57865     57865     hunan          111.5800       26.4500          134       166     2012      03        13        073              0.359500       9.174591       0.000000       0.285289   -9999.000000   -9999.000000       0.061200       0.421000
57865     57865     hunan          111.5800       26.4500          134       166     2012      03        14        074              0.357417      10.810028       2.206391       0.284092       0.128500       0.134500   -9999.000000   -9999.000000
57865     57865     hunan          111.5800       26.4500          134       166     2012      03        15        075              0.364250      10.334930       1.174160       0.287623       0.114500   -9999.000000   -9999.000000       0.459000
57865     57865     hunan          111.5800       26.4500          134       166     2012      03        16        076              0.370292      11.121124       0.485028       0.289294       0.113500       0.223400   -9999.000000   -9999.000000
57865     57865     hunan          111.5800       26.4500          134       166     2012      03        17        077              0.377375      12.196289       0.984752       0.287136   -9999.000000   -9999.000000   -9999.000000       0.530000
57865     57865     hunan          111.5800       26.4500          134       166     2012      03        18        078              0.378667      12.441040       1.671644       0.287438   -9999.000000   -9999.000000       0.055700       0.615000
57865     57865     hunan          111.5800       26.4500          134       166     2012      03        19        079              0.376375      13.165863       0.438777       0.288436       0.119500       0.227100       0.072700       0.563000
57865     57865     hunan          111.5800       26.4500          134       166     2012      03        20        080              0.374750      13.726593       0.219938       0.285899       0.118000   -9999.000000       0.075900       0.572000
57865     57865     hunan          111.5800       26.4500          134       166     2012      03        21        081              0.371792      10.763641       0.225247       0.283884       0.120500       0.133900   -9999.000000   -9999.000000
57865     57865     hunan          111.5800       26.4500          134       166     2012      03        22        082              0.380292      10.684357      10.359884       0.282759   -9999.000000       0.104600   -9999.000000       0.678000
57865     57865     hunan          111.5800       26.4500          134       166     2012      03        23        083              0.378208      10.459076       0.735078       0.294939   -9999.000000   -9999.000000   -9999.000000   -9999.000000
57865     57865     hunan          111.5800       26.4500          134       166     2012      03        24        084              0.370333      11.080322       0.000000       0.295777   -9999.000000       0.428400       0.065900       0.290000
57865     57865     hunan          111.5800       26.4500          134       166     2012      03        25        085              0.000000      14.631897       0.000000       0.282833       0.095000   -9999.000000       0.059000       0.530000
57865     57865     hunan          111.5800       26.4500          134       166     2012      03        26        086              0.366958      16.481812       0.000000       0.277720       0.104500   -9999.000000       0.090200   -9999.000000
57865     57865     hunan          111.5800       26.4500          134       166     2012      03        27        087              0.365083      17.804108       0.000000       0.274646       0.093000       0.294200   -9999.000000       0.505000
57865     57865     hunan          111.5800       26.4500          134       166     2012      03        28        088              0.388625      19.889282      38.079605       0.272089   -9999.000000   -9999.000000   -9999.000000   -9999.000000
57865     57865     hunan          111.5800       26.4500          134       166     2012      03        29        089              0.399792      17.220001       0.143096       0.316411       0.150000       0.169500       0.110100       0.513000
57865     57865     hunan          111.5800       26.4500          134       166     2012      03        30        090              0.404792      17.615845       7.953310       0.303049       0.138500       0.448500       0.104500       0.791000
57865     57865     hunan          111.5800       26.4500          134       166     2012      03        31        091              0.390583      15.539490       0.000000       0.306673       0.088000   -9999.000000       0.100100   -9999.000000
57865     57865     hunan          111.5800       26.4500          134       166     2012      04        01        092              0.375458      17.330933       0.802791       0.290219       0.114000       0.124400   -9999.000000       0.529000
57865     57865     hunan          111.5800       26.4500          134       166     2012      04        02        093              0.365167      19.514252       0.000000       0.284697   -9999.000000   -9999.000000   -9999.000000   -9999.000000
57865     57865     hunan          111.5800       26.4500          134       166     2012      04        03        094              0.357458      21.511963       0.000000       0.280910   -9999.000000       0.135900   -9999.000000       0.324000
57865     57865     hunan          111.5800       26.4500          134       166     2012      04        04        095              0.343958      20.018951       0.150004       0.277470       0.131000       0.296900       0.076500   -9999.000000
57865     57865     hunan          111.5800       26.4500          134       166     2012      04        05        096              0.339625      18.498505       1.059512       0.278414       0.128000   -9999.000000       0.077100       0.307000
57865     57865     hunan          111.5800       26.4500          134       166     2012      04        06        097              0.354917      16.419464       3.395514       0.283840       0.130000       0.119700       0.081600       0.715000
57865     57865     hunan          111.5800       26.4500          134       166     2012      04        07        098              0.389500      15.419250       5.237275       0.290252   -9999.000000   -9999.000000   -9999.000000   -9999.000000
57865     57865     hunan          111.5800       26.4500          134       166     2012      04        08        099              0.390708      15.902924       0.103625       0.292827   -9999.000000       0.110600   -9999.000000       0.422000
57865     57865     hunan          111.5800       26.4500          134       166     2012      04        09        100              0.382917      16.883118       0.000000       0.289290       0.131500       0.188600   -9999.000000   -9999.000000
57865     57865     hunan          111.5800       26.4500          134       166     2012      04        10        101              0.375708      19.976257       0.127414       0.283550       0.119500   -9999.000000       0.103200       0.530000
57865     57865     hunan          111.5800       26.4500          134       166     2012      04        11        102              0.368958      22.529785       0.604087       0.279056       0.151000       0.258000       0.105000       0.592000
57865     57865     hunan          111.5800       26.4500          134       166     2012      04        12        103              0.381917      21.682861      22.100212       0.279530       0.127000   -9999.000000       0.080900   -9999.000000
57865     57865     hunan          111.5800       26.4500          134       166     2012      04        13        104              0.385875      20.790070       0.133118       0.316155   -9999.000000   -9999.000000   -9999.000000       0.427000
57865     57865     hunan          111.5800       26.4500          134       166     2012      04        14        105              0.381167      17.876007       1.074892       0.296034       0.193000       0.256300   -9999.000000   -9999.000000
57865     57865     hunan          111.5800       26.4500          134       166     2012      04        15        106              0.377792      19.499634       0.000000       0.285717       0.166500   -9999.000000       0.100500       0.439000
57865     57865     hunan          111.5800       26.4500          134       166     2012      04        16        107              0.392583      17.425507       2.688783       0.283526       0.148500       0.192300       0.141100       0.638000
57865     57865     hunan          111.5800       26.4500          134       166     2012      04        17        108              0.390958      17.148804       5.586225       0.289237       0.158000       0.212400       0.147400       0.806000
57865     57865     hunan          111.5800       26.4500          134       166     2012      04        18        109              0.398875      16.923615       4.513116       0.289082   -9999.000000   -9999.000000   -9999.000000       0.611000
57865     57865     hunan          111.5800       26.4500          134       166     2012      04        19        110              0.396125      18.037140      12.252880       0.297146   -9999.000000       0.200100   -9999.000000   -9999.000000
57865     57865     hunan          111.5800       26.4500          134       166     2012      04        20        111              0.392875      19.025604       2.834283       0.308227       0.175000   -9999.000000   -9999.000000       0.700000
57865     57865     hunan          111.5800       26.4500          134       166     2012      04        21        112              0.379917      18.727142       0.000000       0.302790       0.136000       0.223400       0.133100   -9999.000000
57865     57865     hunan          111.5800       26.4500          134       166     2012      04        22        113              0.368458      20.955658       0.000000       0.286902       0.162000       0.468600       0.120500       0.481000
57865     57865     hunan          111.5800       26.4500          134       166     2012      04        23        114              0.384083      23.329468       2.416357       0.280937   -9999.000000   -9999.000000       0.172600       0.404000
57865     57865     hunan          111.5800       26.4500          134       166     2012      04        24        115              0.386542      22.628296      14.654150       0.288423   -9999.000000       0.200000   -9999.000000   -9999.000000
57865     57865     hunan          111.5800       26.4500          134       166     2012      04        25        116              0.000000      25.037933       0.063867       0.298785       0.215000   -9999.000000   -9999.000000       0.550000
57865     57865     hunan          111.5800       26.4500          134       166     2012      04        26        117              0.383292      17.271179       0.276420       0.295022       0.180000       0.263300       0.157400   -9999.000000
57865     57865     hunan          111.5800       26.4500          134       166     2012      04        27        118              0.375458      21.471222       0.200195       0.284272       0.174000       0.140600       0.149400       0.355000
57865     57865     hunan          111.5800       26.4500          134       166     2012      04        28        119              0.369083      23.391388       0.683838       0.281945   -9999.000000   -9999.000000       0.163200       0.428000
57865     57865     hunan          111.5800       26.4500          134       166     2012      04        29        120              0.375667      23.520905       1.806396       0.282021   -9999.000000       0.262700       0.162300   -9999.000000
57865     57865     hunan          111.5800       26.4500          134       166     2012      04        30        121              0.396750      24.414856       7.815478       0.284954       0.236000       0.296300   -9999.000000       0.561000
57865     57865     hunan          111.5800       26.4500          134       166     2012      05        01        122              0.395750      26.156189       1.403324       0.293741       0.298000   -9999.000000   -9999.000000   -9999.000000
57865     57865     hunan          111.5800       26.4500          134       166     2012      05        02        123              0.395417      22.163757       6.596589       0.290261       0.281500       0.287600       0.116200       0.645000
57865     57865     hunan          111.5800       26.4500          134       166     2012      05        03        124              0.398583      21.476288       6.483310       0.299814       0.276000   -9999.000000       0.127600   -9999.000000
57865     57865     hunan          111.5800       26.4500          134       166     2012      05        04        125              0.392042      20.905884       8.568889       0.300081   -9999.000000       0.294800       0.138800       0.796000
57865     57865     hunan          111.5800       26.4500          134       166     2012      05        05        126              0.386750      20.608917       0.000000       0.304979       0.295000   -9999.000000   -9999.000000       0.692000
57865     57865     hunan          111.5800       26.4500          134       166     2012      05        06        127              0.381417      22.505035       0.000000       0.289900       0.253500   -9999.000000   -9999.000000   -9999.000000
57865     57865     hunan          111.5800       26.4500          134       166     2012      05        07        128              0.372708      25.737213       0.000000       0.283947   -9999.000000       0.238900   -9999.000000       0.390000
57865     57865     hunan          111.5800       26.4500          134       166     2012      05        08        129              0.355833      26.935089       0.000000       0.278456       0.200000   -9999.000000       0.177000   -9999.000000
57865     57865     hunan          111.5800       26.4500          134       166     2012      05        09        130              0.371208      27.582031      21.139709       0.274062   -9999.000000       0.336400       0.211500       1.000000
57865     57865     hunan          111.5800       26.4500          134       166     2012      05        10        131              0.401750      25.688965       0.520194       0.312276   -9999.000000   -9999.000000       0.194800       0.802000
57865     57865     hunan          111.5800       26.4500          134       166     2012      05        11        132              0.392042      24.904236       7.477634       0.295446       0.256500   -9999.000000   -9999.000000   -9999.000000
57865     57865     hunan          111.5800       26.4500          134       166     2012      05        12        133              0.410292      25.556519      18.799625       0.293561       0.256500       0.197800   -9999.000000       0.690000
57865     57865     hunan          111.5800       26.4500          134       166     2012      05        13        134              0.402125      24.032288       5.642869       0.318602       0.284500   -9999.000000       0.194700   -9999.000000
57865     57865     hunan          111.5800       26.4500          134       166     2012      05        14        135              0.404208      21.461182      15.884221       0.301945   -9999.000000       0.166800       0.246700       0.709000
57865     57865     hunan          111.5800       26.4500          134       166     2012      05        15        136              0.388542      19.605347       0.000000       0.319459   -9999.000000       0.087800       0.224700       0.635000
57865     57865     hunan          111.5800       26.4500          134       166     2012      05        16        137              0.380750      20.964905       0.000000       0.299311       0.244500   -9999.000000       0.238700       0.362000
57865     57865     hunan          111.5800       26.4500          134       166     2012      05        17        138              0.371625      23.644440       1.554995       0.292432       0.227000       0.378000   -9999.000000       0.522000
57865     57865     hunan          111.5800       26.4500          134       166     2012      05        18        139              0.360833      25.236023       0.000000       0.287735       0.200500   -9999.000000   -9999.000000   -9999.000000
57865     57865     hunan          111.5800       26.4500          134       166     2012      05        19        140              0.351708      27.415131       1.277467       0.283929   -9999.000000   -9999.000000       0.195500       0.519000
57865     57865     hunan          111.5800       26.4500          134       166     2012      05        20        141              0.339417      26.220093       0.000000       0.286352   -9999.000000       0.292900       0.202400   -9999.000000
57865     57865     hunan          111.5800       26.4500          134       166     2012      05        21        142              0.324958      25.673218       0.000000       0.280401       0.311000   -9999.000000       0.130100       0.339000
57865     57865     hunan          111.5800       26.4500          134       166     2012      05        22        143              0.318667      25.789825       3.514382       0.277693       0.333500       0.261000   -9999.000000       0.373000
57865     57865     hunan          111.5800       26.4500          134       166     2012      05        23        144              0.332708      22.769318       1.241663       0.285357   -9999.000000       0.315800   -9999.000000   -9999.000000
57865     57865     hunan          111.5800       26.4500          134       166     2012      05        24        145              0.351125      21.855652       3.146955       0.288002       0.291000   -9999.000000   -9999.000000       0.836000
57865     57865     hunan          111.5800       26.4500          134       166     2012      05        25        146              0.000000      20.914429       5.518544       0.288599   -9999.000000       0.299900       0.140500   -9999.000000
57865     57865     hunan          111.5800       26.4500          134       166     2012      05        26        147              0.370917      19.833527       0.747083       0.298105       0.336000   -9999.000000       0.137600       0.718000
57865     57865     hunan          111.5800       26.4500          134       166     2012      05        27        148              0.375292      21.190338       9.051029       0.288725       0.331500       0.310300       0.132300       0.909000
57865     57865     hunan          111.5800       26.4500          134       166     2012      05        28        149              0.376083      21.634827       0.141423       0.302530       0.267000       0.333400   -9999.000000   -9999.000000
57865     57865     hunan          111.5800       26.4500          134       166     2012      05        29        150              0.390583      23.108826      17.110729       0.289494       0.247000   -9999.000000   -9999.000000       0.909000
57865     57865     hunan          111.5800       26.4500          134       166     2012      05        30        151              0.386500      24.289368       0.776182       0.307039   -9999.000000       0.223100       0.138800   -9999.000000
57865     57865     hunan          111.5800       26.4500          134       166     2012      05        31        152              0.385500      23.062958       9.453557       0.298799   -9999.000000   -9999.000000       0.143800   -9999.000000
57865     57865     hunan          111.5800       26.4500          134       166     2012      06        01        153              0.391958      22.959381       4.855518       0.302862       0.430000       0.171600       0.135900   -9999.000000
57865     57865     hunan          111.5800       26.4500          134       166     2012      06        02        154              0.383542      21.161530       0.134332       0.302948       0.348500       0.426500   -9999.000000       0.778000
57865     57865     hunan          111.5800       26.4500          134       166     2012      06        03        155              0.380208      21.923126       0.641685       0.292769       0.369000   -9999.000000   -9999.000000       0.599000
57865     57865     hunan          111.5800       26.4500          134       166     2012      06        04        156              0.388000      22.150879       1.561328       0.290296   -9999.000000       0.419200   -9999.000000   -9999.000000
57865     57865     hunan          111.5800       26.4500          134       166     2012      06        05        157              0.392708      21.838654       5.306339       0.292072   -9999.000000   -9999.000000       0.167000       0.648000
57865     57865     hunan          111.5800       26.4500          134       166     2012      06        06        158              0.388875      22.899414       2.088132       0.295276       0.387000   -9999.000000       0.159200   -9999.000000
57865     57865     hunan          111.5800       26.4500          134       166     2012      06        07        159              0.390000      24.715057      20.171114       0.296831       0.327000       0.270900       0.151900       0.728000
57865     57865     hunan          111.5800       26.4500          134       166     2012      06        08        160              0.385542      26.177094       0.723395       0.307674       0.305000   -9999.000000   -9999.000000       0.859000
57865     57865     hunan          111.5800       26.4500          134       166     2012      06        09        161              0.382833      26.886322       7.225221       0.305262   -9999.000000       0.409300   -9999.000000   -9999.000000
57865     57865     hunan          111.5800       26.4500          134       166     2012      06        10        162              0.383875      27.779327       7.308627       0.305267   -9999.000000       0.340200   -9999.000000       0.861000
57865     57865     hunan          111.5800       26.4500          134       166     2012      06        11        163              0.000000      27.099121       8.076753       0.303545       0.265000   -9999.000000       0.088700   -9999.000000
57865     57865     hunan          111.5800       26.4500          134       166     2012      06        12        164              0.393792      24.485992       2.101570       0.310531       0.211500       0.313500       0.089100       0.616000
57865     57865     hunan          111.5800       26.4500          134       166     2012      06        13        165              0.388625      26.974304       2.772626       0.295226       0.187000   -9999.000000       0.082200       0.679000
57865     57865     hunan          111.5800       26.4500          134       166     2012      06        14        166              0.384625      27.318604       0.090495       0.290019       0.176000       0.552300   -9999.000000       0.529000
57865     57865     hunan          111.5800       26.4500          134       166     2012      06        15        167              0.377625      27.766113       2.542887       0.286322   -9999.000000       0.554500   -9999.000000       0.656000
57865     57865     hunan          111.5800       26.4500          134       166     2012      06        16        168              0.379000      27.521515       4.523468       0.282779       0.240000   -9999.000000       0.073800   -9999.000000
57865     57865     hunan          111.5800       26.4500          134       166     2012      06        17        169              0.392958      28.241638       1.424411       0.285501       0.218500       0.334400       0.083300       0.643000
57865     57865     hunan          111.5800       26.4500          134       166     2012      06        18        170              0.389077      26.463104       0.000000       0.288134       0.175000   -9999.000000       0.103500   -9999.000000
57865     57865     hunan          111.5800       26.4500          134       166     2012      06        19        171              0.000000      27.229004       0.000000       0.283422       0.178500       0.186900   -9999.000000       0.406000
57865     57865     hunan          111.5800       26.4500          134       166     2012      06        20        172              0.000000      27.635834       0.000000       0.278092   -9999.000000       0.302000   -9999.000000       0.532000
57865     57865     hunan          111.5800       26.4500          134       166     2012      06        21        173              0.000000      28.345673       5.043857       0.274529   -9999.000000   -9999.000000   -9999.000000   -9999.000000
57865     57865     hunan          111.5800       26.4500          134       166     2012      06        22        174              0.338000      28.117523       1.408284       0.279416       0.211000       0.245300       0.099000       0.531000
57865     57865     hunan          111.5800       26.4500          134       166     2012      06        23        175              0.382947      26.932251       3.353219       0.286527       0.242000   -9999.000000       0.099700   -9999.000000
57865     57865     hunan          111.5800       26.4500          134       166     2012      06        24        176              0.381636      25.219269       6.130885       0.288952       0.241000       0.248800       0.106000       0.544000
57865     57865     hunan          111.5800       26.4500          134       166     2012      06        25        177              0.379056      26.755768      11.135489       0.285223   -9999.000000       0.167200   -9999.000000       0.733000
57865     57865     hunan          111.5800       26.4500          134       166     2012      06        26        178              0.381042      27.712952       8.528589       0.305165   -9999.000000   -9999.000000   -9999.000000       1.000000
57865     57865     hunan          111.5800       26.4500          134       166     2012      06        27        179              0.375565      26.883240       7.297085       0.302887       0.263000       0.231500   -9999.000000       0.845000
57865     57865     hunan          111.5800       26.4500          134       166     2012      06        28        180              0.367773      27.261993       5.497919       0.303498       0.216500       0.187500       0.144000   -9999.000000
57865     57865     hunan          111.5800       26.4500          134       166     2012      06        29        181              0.357333      28.399963       0.000000       0.300495       0.194500   -9999.000000       0.139200       0.534000
57865     57865     hunan          111.5800       26.4500          134       166     2012      06        30        182              0.346739      30.267029       2.460083       0.283315       0.181000       0.213100       0.142100   -9999.000000
57865     57865     hunan          111.5800       26.4500          134       166     2012      07        01        183              0.335182      29.485138       0.000000       0.283789   -9999.000000   -9999.000000   -9999.000000       0.551000
57865     57865     hunan          111.5800       26.4500          134       166     2012      07        02        184              0.325000      29.007660       0.000000       0.275585       0.320000       0.360800   -9999.000000       0.509000
57865     57865     hunan          111.5800       26.4500          134       166     2012      07        03        185              0.317318      29.409424       0.000000       0.270320       0.277000       0.425900       0.207800   -9999.000000
57865     57865     hunan          111.5800       26.4500          134       166     2012      07        04        186              0.309318      29.467926       0.000000       0.266725       0.245500   -9999.000000       0.207100       0.284000
57865     57865     hunan          111.5800       26.4500          134       166     2012      07        05        187              0.302696      29.450775       0.000000       0.262849       0.236000       0.268300       0.207200   -9999.000000
57865     57865     hunan          111.5800       26.4500          134       166     2012      07        06        188              0.297455      29.901337       3.178930       0.259605   -9999.000000   -9999.000000   -9999.000000       0.445000
57865     57865     hunan          111.5800       26.4500          134       166     2012      07        07        189              0.292348      30.296936       0.000000       0.255621   -9999.000000       0.214200   -9999.000000       0.429000
57865     57865     hunan          111.5800       26.4500          134       166     2012      07        08        190              0.287636      29.829590       0.000000       0.251760       0.286500       0.276800   -9999.000000   -9999.000000
57865     57865     hunan          111.5800       26.4500          134       166     2012      07        09        191              0.283905      29.807343       0.000000       0.247513       0.242500   -9999.000000       0.191900       0.258000
57865     57865     hunan          111.5800       26.4500          134       166     2012      07        10        192              0.280875      30.075836       0.000000       0.243462       0.262000       0.330600       0.185600   -9999.000000
57865     57865     hunan          111.5800       26.4500          134       166     2012      07        11        193              0.278958      29.389557       0.000000       0.239872   -9999.000000   -9999.000000       0.198200       0.405000
57865     57865     hunan          111.5800       26.4500          134       166     2012      07        12        194              0.276833      29.846893       0.000000       0.236048   -9999.000000       0.234100   -9999.000000       0.380000
57865     57865     hunan          111.5800       26.4500          134       166     2012      07        13        195              0.274870      29.566620       0.000000       0.232244       0.251000       0.107000   -9999.000000       0.245000
57865     57865     hunan          111.5800       26.4500          134       166     2012      07        14        196              0.279522      29.646515       9.461498       0.229595       0.285000   -9999.000000       0.147500       0.273000
57865     57865     hunan          111.5800       26.4500          134       166     2012      07        15        197              0.346696      28.417694       4.326565       0.249848       0.323000       0.341700       0.223100   -9999.000000
57865     57865     hunan          111.5800       26.4500          134       166     2012      07        16        198              0.343857      27.448273      21.972969       0.282239       0.276000       0.200200       0.173600       0.604000
57865     57865     hunan          111.5800       26.4500          134       166     2012      07        17        199              0.351292      28.063080       4.202840       0.292403   -9999.000000   -9999.000000       0.174100   -9999.000000
57865     57865     hunan          111.5800       26.4500          134       166     2012      07        18        200              0.356217      27.162231      25.213696       0.301391   -9999.000000       0.179700   -9999.000000       0.949000
57865     57865     hunan          111.5800       26.4500          134       166     2012      07        19        201              0.353391      27.757660       0.000000       0.314691       0.286500   -9999.000000   -9999.000000       0.564000
57865     57865     hunan          111.5800       26.4500          134       166     2012      07        20        202              0.342958      29.040405       4.560633       0.295552       0.321000       0.351300       0.205400   -9999.000000
57865     57865     hunan          111.5800       26.4500          134       166     2012      07        21        203              0.332727      28.733917       0.000000       0.290509       0.252500   -9999.000000       0.193800       0.399000
57865     57865     hunan          111.5800       26.4500          134       166     2012      07        22        204              0.321957      30.681244       6.809760       0.275986   -9999.000000   -9999.000000       0.194600   -9999.000000
57865     57865     hunan          111.5800       26.4500          134       166     2012      07        23        205              0.316625      30.705414      13.419170       0.281322   -9999.000000       0.410000   -9999.000000       0.867000
57865     57865     hunan          111.5800       26.4500          134       166     2012      07        24        206              0.317391      29.262054       3.854171       0.303055       0.268000   -9999.000000   -9999.000000       0.519000
57865     57865     hunan          111.5800       26.4500          134       166     2012      07        25        207              0.315583      27.641235       5.181724       0.292354       0.298000       0.329600   -9999.000000       0.637000
57865     57865     hunan          111.5800       26.4500          134       166     2012      07        26        208              0.309667      28.393188       2.182925       0.292603       0.278000   -9999.000000       0.150900       0.482000
57865     57865     hunan          111.5800       26.4500          134       166     2012      07        27        209              0.306667      28.682251       7.892855       0.284575   -9999.000000   -9999.000000       0.146100   -9999.000000
57865     57865     hunan          111.5800       26.4500          134       166     2012      07        28        210              0.309174      29.302856       0.294620       0.287635   -9999.000000       0.381100       0.154900       0.330000
57865     57865     hunan          111.5800       26.4500          134       166     2012      07        29        211              0.303208      29.112976       0.400949       0.280490       0.311000   -9999.000000   -9999.000000   -9999.000000
57865     57865     hunan          111.5800       26.4500          134       166     2012      07        30        212              0.292522      29.738098       3.876148       0.272456       0.255500       0.186900   -9999.000000       0.550000
57865     57865     hunan          111.5800       26.4500          134       166     2012      07        31        213              0.283333      30.618347       4.205964       0.266867       0.288000       0.118600       0.195200       0.521000
57865     57865     hunan          111.5800       26.4500          134       166     2012      08        01        214              0.277095      30.026154       2.915496       0.273807       0.225000   -9999.000000       0.196200   -9999.000000
57865     57865     hunan          111.5800       26.4500          134       166     2012      08        02        215              0.278182      30.072052       0.895209       0.271988   -9999.000000       0.208300       0.177200       0.312000
57865     57865     hunan          111.5800       26.4500          134       166     2012      08        03        216              0.277708      29.264648       0.000000       0.271047   -9999.000000       0.091100   -9999.000000   -9999.000000
57865     57865     hunan          111.5800       26.4500          134       166     2012      08        04        217              0.292833      29.191498      21.308674       0.261713   -9999.000000   -9999.000000   -9999.000000       0.683000
57865     57865     hunan          111.5800       26.4500          134       166     2012      08        05        218              0.357458      27.589722       8.645522       0.286887       0.334500       0.191400   -9999.000000       1.000000
57865     57865     hunan          111.5800       26.4500          134       166     2012      08        06        219              0.358217      25.804230       3.219944       0.308256       0.290000   -9999.000000       0.149000   -9999.000000
57865     57865     hunan          111.5800       26.4500          134       166     2012      08        07        220              0.362958      28.379425       1.097379       0.292068   -9999.000000       0.432700       0.145200       0.510000
57865     57865     hunan          111.5800       26.4500          134       166     2012      08        08        221              0.353522      29.042206       0.000000       0.282714   -9999.000000       0.258700       0.152900   -9999.000000
57865     57865     hunan          111.5800       26.4500          134       166     2012      08        09        222              0.343955      29.273193       0.225871       0.273158       0.307000   -9999.000000   -9999.000000       0.461000
57865     57865     hunan          111.5800       26.4500          134       166     2012      08        10        223              0.336208      29.059845       0.000000       0.268654       0.255500       0.175100   -9999.000000       0.575000
57865     57865     hunan          111.5800       26.4500          134       166     2012      08        11        224              0.327826      29.688141       0.140732       0.264532       0.219000   -9999.000000   -9999.000000       0.359000
57865     57865     hunan          111.5800       26.4500          134       166     2012      08        12        225              0.320609      30.035950       1.528690       0.261871       0.211000       0.188100       0.139900       0.436000
57865     57865     hunan          111.5800       26.4500          134       166     2012      08        13        226              0.313773      29.669128       5.083912       0.264018   -9999.000000       0.280200       0.204800   -9999.000000
57865     57865     hunan          111.5800       26.4500          134       166     2012      08        14        227              0.307545      28.694550       4.678087       0.275901       0.289000   -9999.000000       0.198100       0.597000
57865     57865     hunan          111.5800       26.4500          134       166     2012      08        15        228              0.300909      29.158966       0.000000       0.282508       0.237500       0.212300   -9999.000000   -9999.000000
57865     57865     hunan          111.5800       26.4500          134       166     2012      08        16        229              0.308478      30.248749       1.003146       0.269686       0.151000   -9999.000000   -9999.000000       0.354000
57865     57865     hunan          111.5800       26.4500          134       166     2012      08        17        230              0.360591      30.718292       2.675619       0.264415       0.262000   -9999.000000       0.185700       0.502000
57865     57865     hunan          111.5800       26.4500          134       166     2012      08        18        231              0.348750      29.818817       2.394887       0.270030   -9999.000000   -9999.000000       0.191100   -9999.000000
57865     57865     hunan          111.5800       26.4500          134       166     2012      08        19        232              0.338478      30.336029       0.000000       0.260140   -9999.000000   -9999.000000       0.188100       0.472000
57865     57865     hunan          111.5800       26.4500          134       166     2012      08        20        233              0.326609      30.791534       1.977186       0.254310       0.257000       0.156900   -9999.000000   -9999.000000
57865     57865     hunan          111.5800       26.4500          134       166     2012      08        21        234              0.329609      30.593658      66.518570       0.250683       0.203000       0.032300   -9999.000000   -9999.000000
57865     57865     hunan          111.5800       26.4500          134       166     2012      08        22        235              0.373174      28.049744       7.529579       0.321481       0.330000   -9999.000000   -9999.000000   -9999.000000
57865     57865     hunan          111.5800       26.4500          134       166     2012      08        23        236              0.365524      24.460815       0.155509       0.316015   -9999.000000       0.213800       0.149300   -9999.000000
57865     57865     hunan          111.5800       26.4500          134       166     2012      08        24        237              0.359652      23.696167       0.000000       0.295265   -9999.000000   -9999.000000       0.145300       0.587000
57865     57865     hunan          111.5800       26.4500          134       166     2012      08        25        238              0.000000      24.620667       0.000000       0.288303       0.304000       0.252300       0.147000   -9999.000000
57865     57865     hunan          111.5800       26.4500          134       166     2012      08        26        239              0.352348      26.357330       0.984949       0.284073       0.264000       0.476500   -9999.000000       0.455000
57865     57865     hunan          111.5800       26.4500          134       166     2012      08        27        240              0.347524      27.540070       0.000000       0.282865       0.231500   -9999.000000   -9999.000000   -9999.000000
57865     57865     hunan          111.5800       26.4500          134       166     2012      08        28        241              0.341091      27.518188       0.000000       0.278404       0.207000       0.234800   -9999.000000       0.528000
57865     57865     hunan          111.5800       26.4500          134       166     2012      08        29        242              0.333455      28.174713       1.256455       0.274652   -9999.000000   -9999.000000       0.118000       0.609000
57865     57865     hunan          111.5800       26.4500          134       166     2012      08        30        243              0.324318      29.036835       0.000000       0.273498   -9999.000000       0.200900       0.117000   -9999.000000
57865     57865     hunan          111.5800       26.4500          134       166     2012      08        31        244              0.315190      28.947266       0.000000       0.271414       0.255000       0.211700       0.121000       0.292000
57865     57865     hunan          111.5800       26.4500          134       166     2012      09        01        245              0.305778      29.779175       0.000000       0.268038       0.253500   -9999.000000   -9999.000000   -9999.000000
57865     57865     hunan          111.5800       26.4500          134       166     2012      09        02        246              0.298150      30.073730      33.950439       0.264719       0.220000       0.254400   -9999.000000       0.548000
57865     57865     hunan          111.5800       26.4500          134       166     2012      09        03        247              0.332524      28.887238       3.088361       0.296636   -9999.000000   -9999.000000       0.153900       0.870000
57865     57865     hunan          111.5800       26.4500          134       166     2012      09        04        248              0.333700      24.167969       0.000000       0.307028   -9999.000000       0.176400       0.156900   -9999.000000
57865     57865     hunan          111.5800       26.4500          134       166     2012      09        05        249              0.329444      24.960266       0.000000       0.287965       0.308000       0.050800       0.154100       0.347000
57865     57865     hunan          111.5800       26.4500          134       166     2012      09        06        250              0.321211      26.248871       0.000000       0.279136       0.266500   -9999.000000   -9999.000000   -9999.000000
57865     57865     hunan          111.5800       26.4500          134       166     2012      09        07        251              0.313727      27.873108       4.565310       0.274978       0.254000       0.169700   -9999.000000       0.581000
57865     57865     hunan          111.5800       26.4500          134       166     2012      09        08        252              0.304810      28.235168       0.331509       0.283739       0.238000       0.111200   -9999.000000       0.533000
57865     57865     hunan          111.5800       26.4500          134       166     2012      09        09        253              0.297158      28.208466       1.251588       0.276583   -9999.000000   -9999.000000       0.157700       0.371000
57865     57865     hunan          111.5800       26.4500          134       166     2012      09        10        254              0.298150      28.312408       0.547389       0.273942       0.310000       0.157800       0.174800       0.547000
57865     57865     hunan          111.5800       26.4500          134       166     2012      09        11        255              0.298050      27.295380       0.797728       0.274639       0.225000   -9999.000000       0.181200   -9999.000000
57865     57865     hunan          111.5800       26.4500          134       166     2012      09        12        256              0.296444      28.180084       7.108249       0.271714       0.206000       0.202100   -9999.000000       0.517000
57865     57865     hunan          111.5800       26.4500          134       166     2012      09        13        257              0.297389      27.088745       1.037776       0.277649       0.234500       0.442700   -9999.000000   -9999.000000
57865     57865     hunan          111.5800       26.4500          134       166     2012      09        14        258              0.298111      21.409485       0.000000       0.282685   -9999.000000   -9999.000000       0.177700       0.229000
57865     57865     hunan          111.5800       26.4500          134       166     2012      09        15        259              0.295684      22.311096       1.194890       0.272876   -9999.000000       0.218600       0.173800       0.431000
57865     57865     hunan          111.5800       26.4500          134       166     2012      09        16        260              0.292611      22.848511       0.289092       0.267252       0.267000   -9999.000000       0.183100   -9999.000000
57865     57865     hunan          111.5800       26.4500          134       166     2012      09        17        261              0.289579      22.038574       0.000000       0.266786       0.221500       0.212600       0.149300       0.379000
57865     57865     hunan          111.5800       26.4500          134       166     2012      09        18        262              0.286458      22.281464       0.000000       0.265617       0.203500       0.474400   -9999.000000   -9999.000000
57865     57865     hunan          111.5800       26.4500          134       166     2012      09        19        263              0.283500      23.627075       0.138177       0.263132       0.200000   -9999.000000   -9999.000000       0.266000
57865     57865     hunan          111.5800       26.4500          134       166     2012      09        20        264              0.318833      24.068024      19.861401       0.261223   -9999.000000       0.187400       0.173300       0.747000
57865     57865     hunan          111.5800       26.4500          134       166     2012      09        21        265              0.352875      22.312408       2.316027       0.303121   -9999.000000   -9999.000000       0.180000   -9999.000000
57865     57865     hunan          111.5800       26.4500          134       166     2012      09        22        266              0.368083      23.322601       5.652755       0.293021       0.246000   -9999.000000       0.184400       0.794000
57865     57865     hunan          111.5800       26.4500          134       166     2012      09        23        267              0.370500      22.644196      18.544476       0.294237       0.264000       0.417800   -9999.000000   -9999.000000
57865     57865     hunan          111.5800       26.4500          134       166     2012      09        24        268              0.367708      22.003174       1.627797       0.317032       0.231000   -9999.000000   -9999.000000       0.596000
57865     57865     hunan          111.5800       26.4500          134       166     2012      09        25        269              0.364250      22.065552       0.086358       0.297446   -9999.000000       0.364300   -9999.000000   -9999.000000
57865     57865     hunan          111.5800       26.4500          134       166     2012      09        26        270              0.360917      23.636993       0.000000       0.287247   -9999.000000   -9999.000000       0.223300       0.543000
57865     57865     hunan          111.5800       26.4500          134       166     2012      09        27        271              0.360643      24.207977       0.000000       0.282543       0.232500   -9999.000000       0.234600       0.657000
57865     57865     hunan          111.5800       26.4500          134       166     2012      09        28        272              0.354533      23.281952       0.000000       0.280272       0.200500   -9999.000000       0.215200   -9999.000000
57865     57865     hunan          111.5800       26.4500          134       166     2012      09        29        273              0.349708      22.644257       0.000000       0.274096       0.178500   -9999.000000   -9999.000000       0.315000
57865     57865     hunan          111.5800       26.4500          134       166     2012      09        30        274              0.344125      21.525146       2.044232       0.270571   -9999.000000       0.200700   -9999.000000   -9999.000000
57865     57865     hunan          111.5800       26.4500          134       166     2012      10        01        275              0.338292      21.778564       0.000000       0.269475   -9999.000000   -9999.000000       0.173500       0.303000
57865     57865     hunan          111.5800       26.4500          134       166     2012      10        02        276              0.332125      22.318268       0.000000       0.267626       0.180000   -9999.000000       0.167100       0.577000
57865     57865     hunan          111.5800       26.4500          134       166     2012      10        03        277              0.326583      22.656219       0.192625       0.265666       0.165500       0.311600       0.176700   -9999.000000
57865     57865     hunan          111.5800       26.4500          134       166     2012      10        04        278              0.321042      22.493774       0.477052       0.265187       0.164000   -9999.000000       0.184000       0.319000
57865     57865     hunan          111.5800       26.4500          134       166     2012      10        05        279              0.316792      20.833740       0.000000       0.267287       0.164000       0.256200   -9999.000000   -9999.000000
57865     57865     hunan          111.5800       26.4500          134       166     2012      10        06        280              0.313417      20.527618       0.123101       0.268457   -9999.000000       0.391800   -9999.000000       0.426000
57865     57865     hunan          111.5800       26.4500          134       166     2012      10        07        281              0.311625      19.571411       0.000000       0.268983   -9999.000000   -9999.000000       0.167500       0.455000
57865     57865     hunan          111.5800       26.4500          134       166     2012      10        08        282              0.308958      21.198395       0.000000       0.267757       0.166000       0.367100       0.118300       0.292000
57865     57865     hunan          111.5800       26.4500          134       166     2012      10        09        283              0.305750      21.803345       0.470823       0.266768       0.158500   -9999.000000       0.115100       0.407000
57865     57865     hunan          111.5800       26.4500          134       166     2012      10        10        284              0.304292      20.235016       0.000000       0.267273       0.153500       0.216800   -9999.000000   -9999.000000
57865     57865     hunan          111.5800       26.4500          134       166     2012      10        11        285              0.301083      21.103271       0.000000       0.264690   -9999.000000       0.364000   -9999.000000       0.373000
57865     57865     hunan          111.5800       26.4500          134       166     2012      10        12        286              0.298000      21.607697       0.000000       0.261868   -9999.000000   -9999.000000   -9999.000000   -9999.000000
57865     57865     hunan          111.5800       26.4500          134       166     2012      10        13        287              0.295125      22.007599       0.000000       0.260443       0.180500       0.182500       0.117900       0.314000
57865     57865     hunan          111.5800       26.4500          134       166     2012      10        14        288              0.292583      21.985870       0.214654       0.258913       0.171000   -9999.000000       0.114900       0.362000
57865     57865     hunan          111.5800       26.4500          134       166     2012      10        15        289              0.290917      21.316681       0.000000       0.259410       0.164000   -9999.000000       0.182300   -9999.000000
57865     57865     hunan          111.5800       26.4500          134       166     2012      10        16        290              0.290125      22.088104       5.805915       0.260127       0.157000       0.129500   -9999.000000       0.847000
57865     57865     hunan          111.5800       26.4500          134       166     2012      10        17        291              0.290917      21.705780       0.000000       0.274265   -9999.000000   -9999.000000   -9999.000000   -9999.000000
57865     57865     hunan          111.5800       26.4500          134       166     2012      10        18        292              0.291667      19.451294       0.000000       0.266668       0.199000       0.251900       0.188300       0.232000
57865     57865     hunan          111.5800       26.4500          134       166     2012      10        19        293              0.290917      20.006653       0.000000       0.262488       0.170000       0.274400       0.194900       0.364000
57865     57865     hunan          111.5800       26.4500          134       166     2012      10        20        294              0.290917      21.153290       0.000000       0.261962       0.148500   -9999.000000       0.180800   -9999.000000
57865     57865     hunan          111.5800       26.4500          134       166     2012      10        21        295              0.288417      23.554016       1.310648       0.260193       0.214000       0.163400   -9999.000000       0.485000
57865     57865     hunan          111.5800       26.4500          134       166     2012      10        22        296              0.284542      23.058319       1.859443       0.263661   -9999.000000   -9999.000000   -9999.000000   -9999.000000
57865     57865     hunan          111.5800       26.4500          134       166     2012      10        23        297              0.282792      19.070618       0.000000       0.269567   -9999.000000       0.274000   -9999.000000       0.247000
57865     57865     hunan          111.5800       26.4500          134       166     2012      10        24        298              0.282833      17.835999       0.352757       0.264933   -9999.000000       0.212000       0.112900   -9999.000000
57865     57865     hunan          111.5800       26.4500          134       166     2012      10        25        299              0.000000      20.143433       0.000000       0.262440       0.220000   -9999.000000       0.119500       0.394000
57865     57865     hunan          111.5800       26.4500          134       166     2012      10        26        300              0.280917      21.719269       0.347904       0.260566       0.215000       0.164300       0.111700       0.443000
57865     57865     hunan          111.5800       26.4500          134       166     2012      10        27        301              0.278333      23.222107       0.241463       0.259157   -9999.000000   -9999.000000   -9999.000000   -9999.000000
57865     57865     hunan          111.5800       26.4500          134       166     2012      10        28        302              0.000000      21.429962       2.399833       0.259973   -9999.000000       0.067400   -9999.000000       0.362000
57865     57865     hunan          111.5800       26.4500          134       166     2012      10        29        303              0.333786      19.915344      10.468027       0.265779       0.314000       0.170800   -9999.000000   -9999.000000
57865     57865     hunan          111.5800       26.4500          134       166     2012      10        30        304              0.356292      19.577179       0.277150       0.290075       0.242000   -9999.000000       0.212700       0.503000
57865     57865     hunan          111.5800       26.4500          134       166     2012      10        31        305              0.351292      17.850647       0.000000       0.278930       0.217500       0.181700       0.205000       0.532000
57865     57865     hunan          111.5800       26.4500          134       166     2012      11        01        306              0.346458      18.186981       0.000000       0.270737       0.176000   -9999.000000       0.201800   -9999.000000
57865     57865     hunan          111.5800       26.4500          134       166     2012      11        02        307              0.343208      17.152863       0.000000       0.267697   -9999.000000   -9999.000000   -9999.000000       0.221000
57865     57865     hunan          111.5800       26.4500          134       166     2012      11        03        308              0.346375      18.362091       1.622986       0.264697   -9999.000000       0.276100   -9999.000000   -9999.000000
57865     57865     hunan          111.5800       26.4500          134       166     2012      11        04        309              0.349125      16.461029       0.000000       0.269934       0.222500   -9999.000000       0.197800       0.321000
57865     57865     hunan          111.5800       26.4500          134       166     2012      11        05        310              0.346458      16.716003       0.251780       0.265178       0.217500       0.405000       0.177400       0.423000
57865     57865     hunan          111.5800       26.4500          134       166     2012      11        06        311              0.348792      16.528748      13.838601       0.264230       0.217000       0.260100       0.181700       0.191000
57865     57865     hunan          111.5800       26.4500          134       166     2012      11        07        312              0.375167      16.011383      18.918322       0.280274   -9999.000000   -9999.000000   -9999.000000       0.755000
57865     57865     hunan          111.5800       26.4500          134       166     2012      11        08        313              0.376524      14.174957      10.330962       0.319466   -9999.000000       0.391800   -9999.000000   -9999.000000
57865     57865     hunan          111.5800       26.4500          134       166     2012      11        09        314              0.372292      13.346008      11.467370       0.310650       0.313500   -9999.000000   -9999.000000       0.860000
57865     57865     hunan          111.5800       26.4500          134       166     2012      11        10        315              0.367083      13.415283       0.162921       0.305432       0.280000       0.251500       0.193100   -9999.000000
57865     57865     hunan          111.5800       26.4500          134       166     2012      11        11        316              0.360500      13.340668       0.000000       0.294894       0.185000   -9999.000000       0.192300       0.231000
57865     57865     hunan          111.5800       26.4500          134       166     2012      11        12        317              0.357333      13.750153       0.000000       0.284048       0.185000   -9999.000000       0.213400       0.382000
57865     57865     hunan          111.5800       26.4500          134       166     2012      11        13        318              0.000000      13.882416       0.000000       0.280201   -9999.000000       0.257400   -9999.000000   -9999.000000
57865     57865     hunan          111.5800       26.4500          134       166     2012      11        14        319              0.354375      15.989471       2.942445       0.276881       0.266000   -9999.000000   -9999.000000       0.467000
57865     57865     hunan          111.5800       26.4500          134       166     2012      11        15        320              0.369750      15.427582       0.489125       0.280485       0.257000       0.140700       0.241500   -9999.000000
57865     57865     hunan          111.5800       26.4500          134       166     2012      11        16        321              0.377292      14.405121      16.687607       0.282892   -9999.000000   -9999.000000       0.225500       0.626000
57865     57865     hunan          111.5800       26.4500          134       166     2012      11        17        322              0.000000      11.525726       1.567857       0.308936       0.204000   -9999.000000       0.230600       0.467000
57865     57865     hunan          111.5800       26.4500          134       166     2012      11        18        323              0.360375      12.572357       0.000000       0.289795   -9999.000000       0.291900       0.226200       0.387000
57865     57865     hunan          111.5800       26.4500          134       166     2012      11        19        324              0.358542      12.377380       0.316715       0.283496   -9999.000000   -9999.000000   -9999.000000       0.387000
57865     57865     hunan          111.5800       26.4500          134       166     2012      11        20        325              0.360625      14.150513       4.714282       0.280579       0.224000   -9999.000000   -9999.000000   -9999.000000
57865     57865     hunan          111.5800       26.4500          134       166     2012      11        21        326              0.380208      14.403442       2.577103       0.286160       0.202000       0.478000       0.160200       0.530000
57865     57865     hunan          111.5800       26.4500          134       166     2012      11        22        327              0.377583      13.228729       3.422428       0.289725       0.189500   -9999.000000       0.145300   -9999.000000
57865     57865     hunan          111.5800       26.4500          134       166     2012      11        23        328              0.367750      12.569458       0.000000       0.291976   -9999.000000       0.363900       0.162300       0.391000
57865     57865     hunan          111.5800       26.4500          134       166     2012      11        24        329              0.363875      11.378204       0.982774       0.284596   -9999.000000       0.363700   -9999.000000       0.387000
57865     57865     hunan          111.5800       26.4500          134       166     2012      11        25        330              0.376292      11.266296       4.616918       0.283401       0.224000   -9999.000000   -9999.000000   -9999.000000
57865     57865     hunan          111.5800       26.4500          134       166     2012      11        26        331              0.367167      11.006775       0.000000       0.291382       0.161000       0.208600   -9999.000000       0.259000
57865     57865     hunan          111.5800       26.4500          134       166     2012      11        27        332              0.362292      10.942993       0.000000       0.284574       0.184500   -9999.000000       0.142200   -9999.000000
57865     57865     hunan          111.5800       26.4500          134       166     2012      11        28        333              0.360167      11.045105       1.225464       0.281545       0.168000       0.244700       0.130500       0.319000
57865     57865     hunan          111.5800       26.4500          134       166     2012      11        29        334              0.361750      11.138062       0.330442       0.280617   -9999.000000       0.210700       0.141100       0.337000
57865     57865     hunan          111.5800       26.4500          134       166     2012      11        30        335              0.376375      11.394440       3.589212       0.280091   -9999.000000   -9999.000000   -9999.000000   -9999.000000
57865     57865     hunan          111.5800       26.4500          134       166     2012      12        01        336              0.372167      10.149719       0.825155       0.286624       0.218000       0.288400   -9999.000000       0.313000
57865     57865     hunan          111.5800       26.4500          134       166     2012      12        02        337              0.366750       9.757965       0.000000       0.287108       0.160000   -9999.000000       0.142100   -9999.000000
57865     57865     hunan          111.5800       26.4500          134       166     2012      12        03        338              0.363625      10.139679       0.136346       0.281945       0.180500       0.176300       0.119400       0.308000
57865     57865     hunan          111.5800       26.4500          134       166     2012      12        04        339              0.361083      10.717499       0.099867       0.279593   -9999.000000       0.347100       0.117800       0.301000
57865     57865     hunan          111.5800       26.4500          134       166     2012      12        05        340              0.358125       9.656830       0.000000       0.279320   -9999.000000   -9999.000000   -9999.000000       0.222000
57865     57865     hunan          111.5800       26.4500          134       166     2012      12        06        341              0.355583      10.882965       0.000000       0.277164       0.179000       0.224300   -9999.000000       0.347000
57865     57865     hunan          111.5800       26.4500          134       166     2012      12        07        342              0.353333      11.266571       0.310370       0.276031       0.179000   -9999.000000   -9999.000000   -9999.000000
57865     57865     hunan          111.5800       26.4500          134       166     2012      12        08        343              0.351167      12.527832       0.000000       0.275192       0.173000       0.093600       0.116700       0.276000
57865     57865     hunan          111.5800       26.4500          134       166     2012      12        09        344              0.348417      12.866364       5.439690       0.274185       0.190000       0.163700       0.135600   -9999.000000
57865     57865     hunan          111.5800       26.4500          134       166     2012      12        10        345              0.376667       9.436493       8.206781       0.288206   -9999.000000   -9999.000000       0.099200       0.411000
57865     57865     hunan          111.5800       26.4500          134       166     2012      12        11        346              0.370125       7.564667       0.170783       0.300962       0.243000       0.241100   -9999.000000       0.356000
57865     57865     hunan          111.5800       26.4500          134       166     2012      12        12        347              0.367167       7.323029       0.808082       0.287860       0.250500       0.113800   -9999.000000   -9999.000000
57865     57865     hunan          111.5800       26.4500          134       166     2012      12        13        348              0.366458       7.427032       0.427079       0.284809       0.208500   -9999.000000   -9999.000000       0.422000
57865     57865     hunan          111.5800       26.4500          134       166     2012      12        14        349              0.364417      10.635406       0.192902       0.282445       0.194000       0.297200       0.094300   -9999.000000
57865     57865     hunan          111.5800       26.4500          134       166     2012      12        15        350              0.000000      13.193970       0.457004       0.280547   -9999.000000   -9999.000000       0.094600       0.256000
57865     57865     hunan          111.5800       26.4500          134       166     2012      12        16        351              0.366417       9.364929       0.160866       0.280606   -9999.000000       0.314600       0.096300       0.358000
57865     57865     hunan          111.5800       26.4500          134       166     2012      12        17        352              0.378167       8.408630       7.427949       0.279605       0.249500       0.434200   -9999.000000   -9999.000000
57865     57865     hunan          111.5800       26.4500          134       166     2012      12        18        353              0.373833       7.121277       0.312346       0.294325   -9999.000000   -9999.000000   -9999.000000       0.367000
57865     57865     hunan          111.5800       26.4500          134       166     2012      12        19        354              0.370375       5.863617       1.244486       0.287687       0.232000       0.179400       0.098200   -9999.000000
57865     57865     hunan          111.5800       26.4500          134       166     2012      12        20        355              0.000000       5.645508       9.154013       0.284704   -9999.000000   -9999.000000       0.103000       0.442000
57865     57865     hunan          111.5800       26.4500          134       166     2012      12        21        356              0.373375       5.157928       0.183186       0.299457   -9999.000000       0.257800       0.104200   -9999.000000
57865     57865     hunan          111.5800       26.4500          134       166     2012      12        22        357              0.367417       4.496826       0.000000       0.291760   -9999.000000       0.330400   -9999.000000       0.263000
57865     57865     hunan          111.5800       26.4500          134       166     2012      12        23        358              0.362875       4.629211       0.000000       0.284013       0.167000   -9999.000000   -9999.000000       0.344000
57865     57865     hunan          111.5800       26.4500          134       166     2012      12        24        359              0.361722       5.252594       0.564224       0.280129       0.138000       0.223100   -9999.000000   -9999.000000
57865     57865     hunan          111.5800       26.4500          134       166     2012      12        25        360              0.359792       6.434021       0.376435       0.280709       0.161000   -9999.000000       0.114600       0.214000
57865     57865     hunan          111.5800       26.4500          134       166     2012      12        26        361              0.000000       5.454010      24.084967       0.280445   -9999.000000       0.158400       0.117300   -9999.000000
57865     57865     hunan          111.5800       26.4500          134       166     2012      12        27        362              0.381917       3.606110       1.615847       0.288108   -9999.000000   -9999.000000       0.122700       0.752000
57865     57865     hunan          111.5800       26.4500          134       166     2012      12        28        363              0.373000       4.067841      20.283270       0.295330       0.215500   -9999.000000   -9999.000000       0.624000
57865     57865     hunan          111.5800       26.4500          134       166     2012      12        29        364              0.000000       3.939728      13.307131       0.311347   -9999.000000   -9999.000000   -9999.000000   -9999.000000
57865     57865     hunan          111.5800       26.4500          134       166     2012      12        30        365              0.000000       4.086304       2.139725       0.310199   -9999.000000   -9999.000000       0.108800       0.038000
57865     57865     hunan          111.5800       26.4500          134       166     2012      12        31        366              0.375733       3.856567       0.374040       0.312343   -9999.000000   -9999.000000       0.106700   -9999.000000
