# Supplementary material for: Research on Fusing Multisatellite Soil Moisture Data Based on Bayesian Model Averaging
Source: Hindawi journal article supplement (doi:10.1155/2018/9310838), 2018-06-25
Supplement: f1 [file 9310838.f1.zip › 2012_sm00-10cm_daily_ZDB_ZHY_57871_366days_allin.txt]

57871     57871     hunan          112.3667       26.9831          132       169     2012      01        01        001              0.000000   -9999.000000      14.190557   -9999.000000       0.112500   -9999.000000       0.083700   -9999.000000
57871     57871     hunan          112.3667       26.9831          132       169     2012      01        02        002              0.000000       4.554718       5.998745       0.337148       0.129000       0.210500   -9999.000000       0.471000
57871     57871     hunan          112.3667       26.9831          132       169     2012      01        03        003              0.000000       4.627472       3.733402       0.334691   -9999.000000   -9999.000000   -9999.000000       0.490000
57871     57871     hunan          112.3667       26.9831          132       169     2012      01        04        004              0.000000       2.271240       0.341761       0.331618   -9999.000000       0.231900   -9999.000000   -9999.000000
57871     57871     hunan          112.3667       26.9831          132       169     2012      01        05        005              0.000000       3.448425       4.359628       0.326367   -9999.000000   -9999.000000       0.079100       0.548000
57871     57871     hunan          112.3667       26.9831          132       169     2012      01        06        006              0.000000       1.930328       0.692492       0.326891   -9999.000000   -9999.000000       0.078300   -9999.000000
57871     57871     hunan          112.3667       26.9831          132       169     2012      01        07        007              0.000000       2.944977       0.687486       0.323594       0.128000       0.291500       0.080000       0.294000
57871     57871     hunan          112.3667       26.9831          132       169     2012      01        08        008              0.000000       3.447723       5.780041       0.322022       0.124000       0.185000   -9999.000000       0.439000
57871     57871     hunan          112.3667       26.9831          132       169     2012      01        09        009              0.000000       3.855530       7.872598       0.319887   -9999.000000   -9999.000000   -9999.000000   -9999.000000
57871     57871     hunan          112.3667       26.9831          132       169     2012      01        10        010              0.000000       4.147156      53.166805       0.318556       0.127000       0.243600       0.064600       0.184000
57871     57871     hunan          112.3667       26.9831          132       169     2012      01        11        011              0.000000       4.718689       5.400110       0.317621       0.107000   -9999.000000       0.066100   -9999.000000
57871     57871     hunan          112.3667       26.9831          132       169     2012      01        12        012              0.000000       4.404816       1.477907       0.317026       0.105000       0.186100       0.064100       0.169000
57871     57871     hunan          112.3667       26.9831          132       169     2012      01        13        013              0.000000       4.617462       6.004000       0.318186       0.120500   -9999.000000   -9999.000000   -9999.000000
57871     57871     hunan          112.3667       26.9831          132       169     2012      01        14        014              0.000000       4.266174      24.570171       0.322004   -9999.000000   -9999.000000   -9999.000000       0.685000
57871     57871     hunan          112.3667       26.9831          132       169     2012      01        15        015              0.000000       3.701080      15.763784       0.344812   -9999.000000   -9999.000000   -9999.000000       0.851000
57871     57871     hunan          112.3667       26.9831          132       169     2012      01        16        016              0.000000       3.006165       0.000000       0.344837   -9999.000000   -9999.000000       0.066900   -9999.000000
57871     57871     hunan          112.3667       26.9831          132       169     2012      01        17        017              0.000000       3.576935       8.148287       0.334889       0.113000       0.173400       0.074600       0.447000
57871     57871     hunan          112.3667       26.9831          132       169     2012      01        18        018              0.000000       4.153259      11.475517       0.337824       0.144000       0.253700       0.072000   -9999.000000
57871     57871     hunan          112.3667       26.9831          132       169     2012      01        19        019              0.000000       3.495667       0.447495       0.344581   -9999.000000   -9999.000000   -9999.000000       0.494000
57871     57871     hunan          112.3667       26.9831          132       169     2012      01        20        020              0.000000       3.436279       3.010571       0.335171   -9999.000000       0.286500   -9999.000000       0.564000
57871     57871     hunan          112.3667       26.9831          132       169     2012      01        21        021              0.000000       3.438873       0.798001       0.333153   -9999.000000   -9999.000000   -9999.000000   -9999.000000
57871     57871     hunan          112.3667       26.9831          132       169     2012      01        22        022              0.000000       2.137115       0.490165       0.322814   -9999.000000   -9999.000000       0.065300       0.186000
57871     57871     hunan          112.3667       26.9831          132       169     2012      01        23        023              0.000000       1.077667       1.096271       0.296622   -9999.000000       0.252000       0.062500   -9999.000000
57871     57871     hunan          112.3667       26.9831          132       169     2012      01        24        024              0.000000       1.036804       0.127006       0.286896   -9999.000000   -9999.000000   -9999.000000       0.223000
57871     57871     hunan          112.3667       26.9831          132       169     2012      01        25        025              0.000000       0.963165       3.269961       0.275624   -9999.000000       0.289600   -9999.000000       0.297000
57871     57871     hunan          112.3667       26.9831          132       169     2012      01        26        026              0.000000       2.497650       0.694888       0.306094       0.134000       0.156900   -9999.000000       0.297000
57871     57871     hunan          112.3667       26.9831          132       169     2012      01        27        027              0.000000       1.966034       1.526787       0.311562       0.132500   -9999.000000       0.066800       0.399000
57871     57871     hunan          112.3667       26.9831          132       169     2012      01        28        028              0.000000       2.333649       0.440496       0.316575   -9999.000000       0.463000       0.061400   -9999.000000
57871     57871     hunan          112.3667       26.9831          132       169     2012      01        29        029              0.000000       3.468170       0.250367       0.318234       0.118000   -9999.000000       0.061200       0.403000
57871     57871     hunan          112.3667       26.9831          132       169     2012      01        30        030              0.000000       4.848541       4.241199       0.317020   -9999.000000       0.097700   -9999.000000   -9999.000000
57871     57871     hunan          112.3667       26.9831          132       169     2012      01        31        031              0.000000       4.022888       0.539560       0.315482   -9999.000000       0.372100   -9999.000000       0.190000
57871     57871     hunan          112.3667       26.9831          132       169     2012      02        01        032              0.000000       6.781036       0.954971       0.314429       0.129500   -9999.000000   -9999.000000       0.244000
57871     57871     hunan          112.3667       26.9831          132       169     2012      02        02        033              0.000000       5.496399       1.699596       0.315446   -9999.000000       0.177800       0.085000   -9999.000000
57871     57871     hunan          112.3667       26.9831          132       169     2012      02        03        034              0.000000       2.229492       3.151700       0.315376       0.144000   -9999.000000       0.090200       0.457000
57871     57871     hunan          112.3667       26.9831          132       169     2012      02        04        035              0.000000       3.125580       0.099065       0.318795   -9999.000000       0.198600       0.088700   -9999.000000
57871     57871     hunan          112.3667       26.9831          132       169     2012      02        05        036              0.000000       3.720886       7.720328       0.315481   -9999.000000       0.204100   -9999.000000       0.728000
57871     57871     hunan          112.3667       26.9831          132       169     2012      02        06        037              0.000000       4.310028       1.211318       0.323698       0.147000   -9999.000000   -9999.000000       0.543000
57871     57871     hunan          112.3667       26.9831          132       169     2012      02        07        038              0.000000       4.468018       0.000000       0.322001   -9999.000000       0.328500   -9999.000000   -9999.000000
57871     57871     hunan          112.3667       26.9831          132       169     2012      02        08        039              0.000000       4.041412       3.212284       0.315180   -9999.000000   -9999.000000       0.061100       0.329000
57871     57871     hunan          112.3667       26.9831          132       169     2012      02        09        040              0.000000       2.631195       0.788272       0.310762   -9999.000000       0.117500       0.063300   -9999.000000
57871     57871     hunan          112.3667       26.9831          132       169     2012      02        10        041              0.000000       1.868866       0.878753       0.305163   -9999.000000       0.146500       0.058700       0.329000
57871     57871     hunan          112.3667       26.9831          132       169     2012      02        11        042              0.000000       2.439240       2.474590       0.308193       0.140000   -9999.000000   -9999.000000   -9999.000000
57871     57871     hunan          112.3667       26.9831          132       169     2012      02        12        043              0.000000       3.794373       0.363410       0.311546       0.145000       0.202500   -9999.000000       0.442000
57871     57871     hunan          112.3667       26.9831          132       169     2012      02        13        044              0.000000       3.847656       0.507047       0.312348       0.140000       0.556500   -9999.000000       0.479000
57871     57871     hunan          112.3667       26.9831          132       169     2012      02        14        045              0.000000       4.366302       0.425493       0.312632       0.139000   -9999.000000       0.083700   -9999.000000
57871     57871     hunan          112.3667       26.9831          132       169     2012      02        15        046              0.000000       4.725555       0.117432       0.311618   -9999.000000       0.111400       0.082600       0.391000
57871     57871     hunan          112.3667       26.9831          132       169     2012      02        16        047              0.000000       3.980530       1.197914       0.310819   -9999.000000   -9999.000000   -9999.000000   -9999.000000
57871     57871     hunan          112.3667       26.9831          132       169     2012      02        17        048              0.000000       4.056732       0.400352       0.309892       0.123000       0.099600   -9999.000000       0.341000
57871     57871     hunan          112.3667       26.9831          132       169     2012      02        18        049              0.000000       4.824524       0.000000       0.308986       0.117000       0.213800   -9999.000000       0.301000
57871     57871     hunan          112.3667       26.9831          132       169     2012      02        19        050              0.000000       4.332642       1.191310       0.307828       0.110000   -9999.000000       0.073500   -9999.000000
57871     57871     hunan          112.3667       26.9831          132       169     2012      02        20        051              0.000000       8.378723       1.734699       0.305665   -9999.000000       0.152500       0.056000       0.338000
57871     57871     hunan          112.3667       26.9831          132       169     2012      02        21        052              0.000000       8.986481       2.104902       0.305558   -9999.000000   -9999.000000   -9999.000000   -9999.000000
57871     57871     hunan          112.3667       26.9831          132       169     2012      02        22        053              0.000000       8.395386      12.916266       0.306215       0.110000       0.145000   -9999.000000       0.340000
57871     57871     hunan          112.3667       26.9831          132       169     2012      02        23        054              0.000000       8.287903       8.762731       0.317759       0.119000       0.264000   -9999.000000       0.914000
57871     57871     hunan          112.3667       26.9831          132       169     2012      02        24        055              0.000000       7.788300       1.322144       0.331261       0.126500   -9999.000000       0.062100       0.598000
57871     57871     hunan          112.3667       26.9831          132       169     2012      02        25        056              0.000000       5.641052       0.392765       0.318774   -9999.000000       0.336500       0.062800       0.518000
57871     57871     hunan          112.3667       26.9831          132       169     2012      02        26        057              0.000000       4.289246      31.730675       0.314369   -9999.000000   -9999.000000       0.059700   -9999.000000
57871     57871     hunan          112.3667       26.9831          132       169     2012      02        27        058              0.000000       3.379913       0.568797       0.311697   -9999.000000       0.174900   -9999.000000       0.497000
57871     57871     hunan          112.3667       26.9831          132       169     2012      02        28        059              0.000000       4.221649       2.321433       0.311645       0.111500       0.101100   -9999.000000   -9999.000000
57871     57871     hunan          112.3667       26.9831          132       169     2012      02        29        060              0.000000   -9999.000000       0.908230   -9999.000000       0.115000   -9999.000000   -9999.000000   -9999.000000
57871     57871     hunan          112.3667       26.9831          132       169     2012      03        01        061              0.000000       6.813721       1.785004       0.312377       0.171000       0.436300       0.058900       0.407000
57871     57871     hunan          112.3667       26.9831          132       169     2012      03        02        062              0.000000       6.387970       3.263808       0.315586   -9999.000000   -9999.000000       0.060300   -9999.000000
57871     57871     hunan          112.3667       26.9831          132       169     2012      03        03        063              0.000000       5.814514       2.987144       0.316688       0.189000   -9999.000000       0.060100       0.639000
57871     57871     hunan          112.3667       26.9831          132       169     2012      03        04        064              0.000000       5.822296      31.322311       0.318761   -9999.000000       0.252300   -9999.000000   -9999.000000
57871     57871     hunan          112.3667       26.9831          132       169     2012      03        05        065              0.000000       5.183044       1.316233       0.348326       0.184000   -9999.000000   -9999.000000       0.512000
57871     57871     hunan          112.3667       26.9831          132       169     2012      03        06        066              0.000000       6.756714       8.172112       0.330141       0.191000       0.317000   -9999.000000       0.530000
57871     57871     hunan          112.3667       26.9831          132       169     2012      03        07        067              0.000000       6.017090       1.384857       0.331960   -9999.000000       0.184200       0.067600   -9999.000000
57871     57871     hunan          112.3667       26.9831          132       169     2012      03        08        068              0.000000       6.369995       3.083011       0.326237       0.179000   -9999.000000       0.064900       0.578000
57871     57871     hunan          112.3667       26.9831          132       169     2012      03        09        069              0.000000       5.569275       0.693858       0.325118   -9999.000000       0.249500       0.061700   -9999.000000
57871     57871     hunan          112.3667       26.9831          132       169     2012      03        10        070              0.000000       4.862976       1.111446       0.323214       0.150000   -9999.000000   -9999.000000       0.394000
57871     57871     hunan          112.3667       26.9831          132       169     2012      03        11        071              0.000000       7.512695       0.870228       0.318805       0.111000       0.249100   -9999.000000   -9999.000000
57871     57871     hunan          112.3667       26.9831          132       169     2012      03        12        072              0.000000       8.828430       1.234434       0.317037   -9999.000000       0.161800       0.057200       0.407000
57871     57871     hunan          112.3667       26.9831          132       169     2012      03        13        073              0.000000       9.259979       0.000000       0.316423   -9999.000000   -9999.000000       0.060100       0.385000
57871     57871     hunan          112.3667       26.9831          132       169     2012      03        14        074              0.000000       9.423798       4.650045       0.315425       0.122500       0.307000       0.064500   -9999.000000
57871     57871     hunan          112.3667       26.9831          132       169     2012      03        15        075              0.000000       9.311066       1.302615       0.320975       0.113000   -9999.000000       0.059400       0.499000
57871     57871     hunan          112.3667       26.9831          132       169     2012      03        16        076              0.000000      10.835938       0.179598       0.320981       0.119000       0.275700   -9999.000000   -9999.000000
57871     57871     hunan          112.3667       26.9831          132       169     2012      03        17        077              0.000000      10.983429       3.957910       0.317349   -9999.000000       0.237500   -9999.000000       0.484000
57871     57871     hunan          112.3667       26.9831          132       169     2012      03        18        078              0.000000      11.258789       2.058973       0.315574   -9999.000000   -9999.000000       0.062200       0.534000
57871     57871     hunan          112.3667       26.9831          132       169     2012      03        19        079              0.000000      12.655029       2.119529       0.317912       0.114000       0.253300       0.082800   -9999.000000
57871     57871     hunan          112.3667       26.9831          132       169     2012      03        20        080              0.000000      12.204742       0.178039       0.317901       0.116500   -9999.000000       0.080900       0.396000
57871     57871     hunan          112.3667       26.9831          132       169     2012      03        21        081              0.000000       8.868164       9.479755       0.314803       0.116000       0.123000   -9999.000000   -9999.000000
57871     57871     hunan          112.3667       26.9831          132       169     2012      03        22        082              0.000000       9.734467       4.261380       0.313036       0.130000       0.279100   -9999.000000       0.622000
57871     57871     hunan          112.3667       26.9831          132       169     2012      03        23        083              0.000000       8.660919       0.093551       0.317136   -9999.000000   -9999.000000   -9999.000000       0.631000
57871     57871     hunan          112.3667       26.9831          132       169     2012      03        24        084              0.000000      10.202240       8.430372       0.315801       0.106000       0.287200       0.067900       0.333000
57871     57871     hunan          112.3667       26.9831          132       169     2012      03        25        085              0.000000      13.851685       0.000000       0.308998       0.096500       0.490300       0.069000       0.490000
57871     57871     hunan          112.3667       26.9831          132       169     2012      03        26        086              0.000000      15.787292       2.366783       0.305634       0.095000   -9999.000000       0.090600   -9999.000000
57871     57871     hunan          112.3667       26.9831          132       169     2012      03        27        087              0.000000      17.157288       4.196955       0.303338       0.090000       0.175400   -9999.000000       0.416000
57871     57871     hunan          112.3667       26.9831          132       169     2012      03        28        088              0.000000      19.054138      16.056488       0.301178   -9999.000000   -9999.000000   -9999.000000   -9999.000000
57871     57871     hunan          112.3667       26.9831          132       169     2012      03        29        089              0.000000      18.147583       3.666371       0.320407   -9999.000000       0.325100       0.103600       0.562000
57871     57871     hunan          112.3667       26.9831          132       169     2012      03        30        090              0.000000      16.813812       9.785025       0.324943       0.121500       0.495000       0.104700       0.972000
57871     57871     hunan          112.3667       26.9831          132       169     2012      03        31        091              0.000000      14.765198       0.678220       0.330146       0.091500   -9999.000000       0.099400   -9999.000000
57871     57871     hunan          112.3667       26.9831          132       169     2012      04        01        092              0.000000      16.532806       0.000000       0.312895       0.111500       0.358700       0.091100       0.404000
57871     57871     hunan          112.3667       26.9831          132       169     2012      04        02        093              0.000000      19.006287       1.340453       0.307323   -9999.000000   -9999.000000   -9999.000000   -9999.000000
57871     57871     hunan          112.3667       26.9831          132       169     2012      04        03        094              0.000000      21.532532       0.000000       0.303941   -9999.000000   -9999.000000   -9999.000000       0.289000
57871     57871     hunan          112.3667       26.9831          132       169     2012      04        04        095              0.000000      19.119110       0.253220       0.300294       0.116500       0.172900       0.082300       0.349000
57871     57871     hunan          112.3667       26.9831          132       169     2012      04        05        096              0.000000      15.917084       1.222502       0.302381       0.106500   -9999.000000       0.075400   -9999.000000
57871     57871     hunan          112.3667       26.9831          132       169     2012      04        06        097              0.000000      15.767365       1.314414       0.303060       0.115000       0.337100       0.082900       0.458000
57871     57871     hunan          112.3667       26.9831          132       169     2012      04        07        098              0.000000      15.229279       2.120674       0.306809   -9999.000000       0.348600   -9999.000000   -9999.000000
57871     57871     hunan          112.3667       26.9831          132       169     2012      04        08        099              0.000000      16.891510       0.239931       0.306409   -9999.000000       0.321700   -9999.000000       0.425000
57871     57871     hunan          112.3667       26.9831          132       169     2012      04        09        100              0.000000      16.887573       0.391717       0.306242       0.119000       0.178300   -9999.000000   -9999.000000
57871     57871     hunan          112.3667       26.9831          132       169     2012      04        10        101              0.000000      18.666412       0.174968       0.303210       0.111000   -9999.000000       0.063500       0.531000
57871     57871     hunan          112.3667       26.9831          132       169     2012      04        11        102              0.000000      22.002136       1.339793       0.299372       0.138500       0.147900       0.069000       0.378000
57871     57871     hunan          112.3667       26.9831          132       169     2012      04        12        103              0.000000      19.092407       1.890114       0.301715       0.137000   -9999.000000       0.062100   -9999.000000
57871     57871     hunan          112.3667       26.9831          132       169     2012      04        13        104              0.000000      18.739838       0.498428       0.302152   -9999.000000   -9999.000000   -9999.000000       0.374000
57871     57871     hunan          112.3667       26.9831          132       169     2012      04        14        105              0.000000      16.992554       3.021386       0.299827       0.162000       0.147200   -9999.000000   -9999.000000
57871     57871     hunan          112.3667       26.9831          132       169     2012      04        15        106              0.000000      17.044556       0.264347       0.305315       0.149500   -9999.000000       0.063500       0.351000
57871     57871     hunan          112.3667       26.9831          132       169     2012      04        16        107              0.000000      15.609161       0.664239       0.300311       0.139500       0.263600       0.125700       0.498000
57871     57871     hunan          112.3667       26.9831          132       169     2012      04        17        108              0.000000      17.086823       5.160409       0.300337       0.154000       0.220400       0.153500   -9999.000000
57871     57871     hunan          112.3667       26.9831          132       169     2012      04        18        109              0.000000      16.736633       0.000000       0.307365   -9999.000000   -9999.000000   -9999.000000       0.535000
57871     57871     hunan          112.3667       26.9831          132       169     2012      04        19        110              0.000000      18.585541       9.701963       0.305702   -9999.000000       0.191300   -9999.000000   -9999.000000
57871     57871     hunan          112.3667       26.9831          132       169     2012      04        20        111              0.000000      19.441956       0.000000       0.314599       0.161500   -9999.000000   -9999.000000       0.845000
57871     57871     hunan          112.3667       26.9831          132       169     2012      04        21        112              0.000000      18.001495       0.000000       0.314690       0.135500       0.219300       0.126300       0.778000
57871     57871     hunan          112.3667       26.9831          132       169     2012      04        22        113              0.000000      20.534424       0.000000       0.301342       0.137000       0.246700       0.125900       0.518000
57871     57871     hunan          112.3667       26.9831          132       169     2012      04        23        114              0.000000      22.675995       1.007837       0.294951   -9999.000000   -9999.000000       0.172000       0.588000
57871     57871     hunan          112.3667       26.9831          132       169     2012      04        24        115              0.000000      21.995544       0.847436       0.298569   -9999.000000       0.254900   -9999.000000   -9999.000000
57871     57871     hunan          112.3667       26.9831          132       169     2012      04        25        116              0.000000      24.833801       1.238794       0.293318       0.170000       0.257700   -9999.000000       0.683000
57871     57871     hunan          112.3667       26.9831          132       169     2012      04        26        117              0.000000      17.162689       0.109375       0.297361       0.148000       0.278300   -9999.000000   -9999.000000
57871     57871     hunan          112.3667       26.9831          132       169     2012      04        27        118              0.000000      21.311615       0.000000       0.291640       0.143500       0.221600       0.157400       0.520000
57871     57871     hunan          112.3667       26.9831          132       169     2012      04        28        119              0.000000      22.933746       0.082056       0.289847       0.148000   -9999.000000       0.181600       0.615000
57871     57871     hunan          112.3667       26.9831          132       169     2012      04        29        120              0.000000      23.066406       0.387036       0.290079   -9999.000000       0.268000       0.162900   -9999.000000
57871     57871     hunan          112.3667       26.9831          132       169     2012      04        30        121              0.000000      23.069244      22.853956       0.291945       0.184000       0.505600   -9999.000000       0.803000
57871     57871     hunan          112.3667       26.9831          132       169     2012      05        01        122              0.000000      23.759491      17.050261       0.344171       0.252000   -9999.000000   -9999.000000   -9999.000000
57871     57871     hunan          112.3667       26.9831          132       169     2012      05        02        123              0.000000      20.802643       0.251628       0.335553       0.234000       0.276700       0.125900       0.666000
57871     57871     hunan          112.3667       26.9831          132       169     2012      05        03        124              0.000000      21.009277       3.657442       0.313994       0.252000   -9999.000000       0.134300       0.888000
57871     57871     hunan          112.3667       26.9831          132       169     2012      05        04        125              0.000000      20.254883       2.722576       0.316230   -9999.000000       0.335100       0.122300   -9999.000000
57871     57871     hunan          112.3667       26.9831          132       169     2012      05        05        126              0.000000      20.484192       1.967226       0.309350       0.222000   -9999.000000   -9999.000000       0.576000
57871     57871     hunan          112.3667       26.9831          132       169     2012      05        06        127              0.000000      23.644226       1.357134       0.304393       0.198000   -9999.000000   -9999.000000   -9999.000000
57871     57871     hunan          112.3667       26.9831          132       169     2012      05        07        128              0.000000      25.444275       0.000000       0.300635   -9999.000000       0.283700   -9999.000000       0.487000
57871     57871     hunan          112.3667       26.9831          132       169     2012      05        08        129              0.000000      27.096100       0.000000       0.295441       0.192500   -9999.000000       0.125100   -9999.000000
57871     57871     hunan          112.3667       26.9831          132       169     2012      05        09        130              0.000000      27.993317      24.255297       0.291570   -9999.000000       0.233000       0.148200       0.937000
57871     57871     hunan          112.3667       26.9831          132       169     2012      05        10        131              0.000000      24.707001       0.129287       0.331298   -9999.000000       0.522800       0.133600       0.769000
57871     57871     hunan          112.3667       26.9831          132       169     2012      05        11        132              0.000000      24.471771       1.356972       0.314123       0.217500   -9999.000000   -9999.000000   -9999.000000
57871     57871     hunan          112.3667       26.9831          132       169     2012      05        12        133              0.000000      25.921692      13.582229       0.306261       0.231500       0.547500   -9999.000000       0.705000
57871     57871     hunan          112.3667       26.9831          132       169     2012      05        13        134              0.000000      23.193176       1.335003       0.328519       0.250000   -9999.000000   -9999.000000   -9999.000000
57871     57871     hunan          112.3667       26.9831          132       169     2012      05        14        135              0.000000      21.042633      10.668108       0.314097   -9999.000000       0.502100       0.217400       0.627000
57871     57871     hunan          112.3667       26.9831          132       169     2012      05        15        136              0.000000      19.155823       0.285640       0.328771   -9999.000000       0.346300       0.202500       0.658000
57871     57871     hunan          112.3667       26.9831          132       169     2012      05        16        137              0.000000      21.795105       0.435010       0.312721       0.223000   -9999.000000       0.192700   -9999.000000
57871     57871     hunan          112.3667       26.9831          132       169     2012      05        17        138              0.000000      24.239349       0.784377       0.307085       0.200500       0.389300   -9999.000000       0.354000
57871     57871     hunan          112.3667       26.9831          132       169     2012      05        18        139              0.000000      25.531433       6.294010       0.303502       0.166000       0.534000   -9999.000000   -9999.000000
57871     57871     hunan          112.3667       26.9831          132       169     2012      05        19        140              0.000000      27.423981       0.460684       0.306942       0.205000   -9999.000000       0.190700       0.480000
57871     57871     hunan          112.3667       26.9831          132       169     2012      05        20        141              0.000000      23.980988       0.000000       0.306383   -9999.000000       0.408300       0.191100       0.446000
57871     57871     hunan          112.3667       26.9831          132       169     2012      05        21        142              0.000000      25.037567       0.000000       0.299193       0.300000   -9999.000000       0.104200       0.326000
57871     57871     hunan          112.3667       26.9831          132       169     2012      05        22        143              0.000000      25.204865       9.848130       0.296294       0.365000       0.392200   -9999.000000       0.306000
57871     57871     hunan          112.3667       26.9831          132       169     2012      05        23        144              0.000000      21.997559       4.025630       0.310363   -9999.000000       0.458600   -9999.000000   -9999.000000
57871     57871     hunan          112.3667       26.9831          132       169     2012      05        24        145              0.000000      21.076935       5.392411       0.319142       0.366000   -9999.000000   -9999.000000       0.849000
57871     57871     hunan          112.3667       26.9831          132       169     2012      05        25        146              0.000000      20.128326      10.052134       0.316140   -9999.000000       0.342000       0.129400   -9999.000000
57871     57871     hunan          112.3667       26.9831          132       169     2012      05        26        147              0.000000      19.437378       6.560846       0.327899   -9999.000000   -9999.000000       0.129900       0.788000
57871     57871     hunan          112.3667       26.9831          132       169     2012      05        27        148              0.000000      20.302795       1.959403       0.325235       0.335500       0.362900       0.126000       0.630000
57871     57871     hunan          112.3667       26.9831          132       169     2012      05        28        149              0.000000      22.188324       1.411584       0.317680       0.303000       0.216900   -9999.000000   -9999.000000
57871     57871     hunan          112.3667       26.9831          132       169     2012      05        29        150              0.000000      23.391510      21.371048       0.313271       0.333000   -9999.000000   -9999.000000       0.958000
57871     57871     hunan          112.3667       26.9831          132       169     2012      05        30        151              0.000000      24.586029       0.684352       0.334354   -9999.000000       0.290500       0.117900   -9999.000000
57871     57871     hunan          112.3667       26.9831          132       169     2012      05        31        152              0.000000      23.153320       4.459491       0.321687   -9999.000000   -9999.000000       0.124900   -9999.000000
57871     57871     hunan          112.3667       26.9831          132       169     2012      06        01        153              0.000000      23.412567       8.803353       0.320190       0.390500       0.358500       0.126500       0.793000
57871     57871     hunan          112.3667       26.9831          132       169     2012      06        02        154              0.000000      21.249603       1.470109       0.329175       0.357000       0.326900       0.118500   -9999.000000
57871     57871     hunan          112.3667       26.9831          132       169     2012      06        03        155              0.000000      21.991516      14.079435       0.318240       0.414500   -9999.000000   -9999.000000       0.962000
57871     57871     hunan          112.3667       26.9831          132       169     2012      06        04        156              0.000000      21.882629       3.065732       0.330655   -9999.000000       0.457400   -9999.000000   -9999.000000
57871     57871     hunan          112.3667       26.9831          132       169     2012      06        05        157              0.000000      21.659302       1.938817       0.327797   -9999.000000   -9999.000000       0.087200       0.634000
57871     57871     hunan          112.3667       26.9831          132       169     2012      06        06        158              0.000000      23.049286       1.260293       0.321928       0.387000   -9999.000000       0.081400   -9999.000000
57871     57871     hunan          112.3667       26.9831          132       169     2012      06        07        159              0.000000      24.795807       6.443020       0.320205       0.330000       0.597900       0.061500       0.779000
57871     57871     hunan          112.3667       26.9831          132       169     2012      06        08        160              0.000000      26.493347       1.208734       0.322075       0.323500   -9999.000000   -9999.000000       0.814000
57871     57871     hunan          112.3667       26.9831          132       169     2012      06        09        161              0.000000      27.269196       0.730405       0.317048       0.297000       0.394100   -9999.000000   -9999.000000
57871     57871     hunan          112.3667       26.9831          132       169     2012      06        10        162              0.000000      28.916595      86.944702       0.312004   -9999.000000       0.442800   -9999.000000       0.932000
57871     57871     hunan          112.3667       26.9831          132       169     2012      06        11        163              0.000000      28.102081       1.354346       0.392114       0.291000   -9999.000000       0.102600   -9999.000000
57871     57871     hunan          112.3667       26.9831          132       169     2012      06        12        164              0.000000      25.322296       0.000000       0.428541       0.238500       0.379700       0.096000       0.581000
57871     57871     hunan          112.3667       26.9831          132       169     2012      06        13        165              0.000000      27.463867       0.724631       0.351461       0.237500   -9999.000000       0.089300       0.766000
57871     57871     hunan          112.3667       26.9831          132       169     2012      06        14        166              0.000000      28.385193       1.132613       0.332035       0.224000       0.395800   -9999.000000   -9999.000000
57871     57871     hunan          112.3667       26.9831          132       169     2012      06        15        167              0.000000      27.809998       1.482688       0.324854   -9999.000000       0.328200   -9999.000000       0.447000
57871     57871     hunan          112.3667       26.9831          132       169     2012      06        16        168              0.000000      27.815582       0.221652       0.318204   -9999.000000   -9999.000000       0.089700   -9999.000000
57871     57871     hunan          112.3667       26.9831          132       169     2012      06        17        169              0.000000      28.084534      10.492650       0.313211       0.229500       0.256500       0.089100       0.703000
57871     57871     hunan          112.3667       26.9831          132       169     2012      06        18        170              0.000000      26.968842       1.700529       0.325656       0.197500   -9999.000000       0.069500       0.634000
57871     57871     hunan          112.3667       26.9831          132       169     2012      06        19        171              0.000000      27.489197       0.630150       0.315835       0.208500       0.218400       0.064600       0.389000
57871     57871     hunan          112.3667       26.9831          132       169     2012      06        20        172              0.000000      27.736176       2.016093       0.309094   -9999.000000       0.229700   -9999.000000       0.588000
57871     57871     hunan          112.3667       26.9831          132       169     2012      06        21        173              0.000000      28.606995       8.178083       0.305902   -9999.000000   -9999.000000   -9999.000000   -9999.000000
57871     57871     hunan          112.3667       26.9831          132       169     2012      06        22        174              0.000000      28.670258       3.225786       0.310381       0.226000       0.342700       0.067800       0.566000
57871     57871     hunan          112.3667       26.9831          132       169     2012      06        23        175              0.000000      27.850891       0.955414       0.316536       0.252500       0.610600       0.069700   -9999.000000
57871     57871     hunan          112.3667       26.9831          132       169     2012      06        24        176              0.000000      25.735046       1.494529       0.313113       0.239500   -9999.000000       0.067500       0.650000
57871     57871     hunan          112.3667       26.9831          132       169     2012      06        25        177              0.000000      27.844513      11.562074       0.307700   -9999.000000       0.362100   -9999.000000       0.558000
57871     57871     hunan          112.3667       26.9831          132       169     2012      06        26        178              0.000000      27.969238       1.367414       0.320082   -9999.000000   -9999.000000   -9999.000000   -9999.000000
57871     57871     hunan          112.3667       26.9831          132       169     2012      06        27        179              0.000000      27.155212       5.308679       0.314973       0.271000       0.393900   -9999.000000       0.902000
57871     57871     hunan          112.3667       26.9831          132       169     2012      06        28        180              0.000000      27.988190       1.005737       0.315722       0.240500       0.475100       0.103000   -9999.000000
57871     57871     hunan          112.3667       26.9831          132       169     2012      06        29        181              0.000000      28.930786       3.825256       0.309713       0.217000   -9999.000000       0.101800       0.511000
57871     57871     hunan          112.3667       26.9831          132       169     2012      06        30        182              0.000000      30.225830       0.990216       0.303164       0.204000       0.238400       0.089900   -9999.000000
57871     57871     hunan          112.3667       26.9831          132       169     2012      07        01        183              0.000000      30.046234       2.666853       0.296567   -9999.000000   -9999.000000   -9999.000000   -9999.000000
57871     57871     hunan          112.3667       26.9831          132       169     2012      07        02        184              0.000000      29.304810      11.831046       0.291497       0.286000       0.418200   -9999.000000       0.336000
57871     57871     hunan          112.3667       26.9831          132       169     2012      07        03        185              0.000000      29.429871       0.000000       0.288114       0.255500       0.465600       0.127200   -9999.000000
57871     57871     hunan          112.3667       26.9831          132       169     2012      07        04        186              0.000000      29.984924       2.802840       0.284964       0.242500   -9999.000000       0.127800       0.260000
57871     57871     hunan          112.3667       26.9831          132       169     2012      07        05        187              0.000000      30.160248      12.189665       0.281673       0.221000       0.201200       0.129500   -9999.000000
57871     57871     hunan          112.3667       26.9831          132       169     2012      07        06        188              0.000000      30.506012       1.027931       0.278838   -9999.000000   -9999.000000   -9999.000000       0.446000
57871     57871     hunan          112.3667       26.9831          132       169     2012      07        07        189              0.000000      30.689667       0.000000       0.278339   -9999.000000       0.181300   -9999.000000       0.316000
57871     57871     hunan          112.3667       26.9831          132       169     2012      07        08        190              0.000000      30.191559       3.033778       0.275349       0.249000       0.180200   -9999.000000   -9999.000000
57871     57871     hunan          112.3667       26.9831          132       169     2012      07        09        191              0.000000      30.362854       9.585348       0.271630       0.238000   -9999.000000       0.119700       0.172000
57871     57871     hunan          112.3667       26.9831          132       169     2012      07        10        192              0.000000      30.840759       0.000000       0.268655       0.229000       0.271500       0.119500   -9999.000000
57871     57871     hunan          112.3667       26.9831          132       169     2012      07        11        193              0.000000      30.458099       0.000000       0.266274   -9999.000000       0.415600       0.115400       0.262000
57871     57871     hunan          112.3667       26.9831          132       169     2012      07        12        194              0.000000      30.900146       5.864580       0.263505   -9999.000000   -9999.000000   -9999.000000       0.269000
57871     57871     hunan          112.3667       26.9831          132       169     2012      07        13        195              0.000000      30.644012       0.906820       0.272601       0.244000       0.248900   -9999.000000   -9999.000000
57871     57871     hunan          112.3667       26.9831          132       169     2012      07        14        196              0.000000      30.483124      74.504105       0.269165   -9999.000000   -9999.000000   -9999.000000       0.581000
57871     57871     hunan          112.3667       26.9831          132       169     2012      07        15        197              0.000000      27.603333      14.506263       0.357741       0.264000       0.219800       0.129600   -9999.000000
57871     57871     hunan          112.3667       26.9831          132       169     2012      07        16        198              0.000000      27.487366     105.410049       0.352418       0.254000       0.498600       0.153700       1.000000
57871     57871     hunan          112.3667       26.9831          132       169     2012      07        17        199              0.000000      27.488617      20.669266       0.416925   -9999.000000   -9999.000000       0.156000   -9999.000000
57871     57871     hunan          112.3667       26.9831          132       169     2012      07        18        200              0.000000      27.076965      21.428923       0.509168   -9999.000000       0.277200   -9999.000000       0.961000
57871     57871     hunan          112.3667       26.9831          132       169     2012      07        19        201              0.000000      27.898773       0.351328       0.496080       0.259000   -9999.000000   -9999.000000       0.645000
57871     57871     hunan          112.3667       26.9831          132       169     2012      07        20        202              0.000000      28.329773       2.281003       0.390794       0.280000       0.390000       0.166900   -9999.000000
57871     57871     hunan          112.3667       26.9831          132       169     2012      07        21        203              0.000000      28.963196       4.021196       0.342244       0.211500       0.308100       0.166300       0.432000
57871     57871     hunan          112.3667       26.9831          132       169     2012      07        22        204              0.000000      30.525757       3.319747       0.331760   -9999.000000   -9999.000000       0.150800   -9999.000000
57871     57871     hunan          112.3667       26.9831          132       169     2012      07        23        205              0.000000      30.324127      21.339518       0.328999   -9999.000000       0.314600   -9999.000000       0.648000
57871     57871     hunan          112.3667       26.9831          132       169     2012      07        24        206              0.000000      28.427856       0.317925       0.342245       0.225000   -9999.000000   -9999.000000       0.480000
57871     57871     hunan          112.3667       26.9831          132       169     2012      07        25        207              0.000000      28.573700       3.418502       0.326254       0.222500       0.261400   -9999.000000   -9999.000000
57871     57871     hunan          112.3667       26.9831          132       169     2012      07        26        208              0.000000      29.186890       1.828330       0.323689       0.215500       0.166900       0.151000       0.363000
57871     57871     hunan          112.3667       26.9831          132       169     2012      07        27        209              0.000000      29.370880       0.955624       0.318628       0.205000   -9999.000000       0.164900   -9999.000000
57871     57871     hunan          112.3667       26.9831          132       169     2012      07        28        210              0.000000      29.864563       1.706584       0.313714   -9999.000000       0.251800       0.149000       0.339000
57871     57871     hunan          112.3667       26.9831          132       169     2012      07        29        211              0.000000      29.630554       1.802902       0.313057       0.225000       0.465600   -9999.000000       0.470000
57871     57871     hunan          112.3667       26.9831          132       169     2012      07        30        212              0.000000      30.237732       0.510744       0.308836       0.199500       0.284500   -9999.000000       0.344000
57871     57871     hunan          112.3667       26.9831          132       169     2012      07        31        213              0.000000      30.756226      17.292225       0.305243       0.198000       0.269200   -9999.000000       0.324000
57871     57871     hunan          112.3667       26.9831          132       169     2012      08        01        214              0.000000      30.739075       2.202383       0.302467       0.217000   -9999.000000       0.195300   -9999.000000
57871     57871     hunan          112.3667       26.9831          132       169     2012      08        02        215              0.000000      30.881226       0.139950       0.303387   -9999.000000       0.370800       0.189900       0.253000
57871     57871     hunan          112.3667       26.9831          132       169     2012      08        03        216              0.000000      29.950317       0.000000       0.299693   -9999.000000       0.530400       0.177300   -9999.000000
57871     57871     hunan          112.3667       26.9831          132       169     2012      08        04        217              0.000000      29.517975      38.926361       0.294408       0.274000   -9999.000000   -9999.000000       0.811000
57871     57871     hunan          112.3667       26.9831          132       169     2012      08        05        218              0.000000      26.684448       5.142748       0.340739       0.255500       0.502200   -9999.000000       0.956000
57871     57871     hunan          112.3667       26.9831          132       169     2012      08        06        219              0.000000      26.079987       7.137411       0.332245       0.226500   -9999.000000       0.143500   -9999.000000
57871     57871     hunan          112.3667       26.9831          132       169     2012      08        07        220              0.000000      28.261505       0.471470       0.325841   -9999.000000       0.289200       0.144400       0.456000
57871     57871     hunan          112.3667       26.9831          132       169     2012      08        08        221              0.000000      29.201630       0.000000       0.313223   -9999.000000       0.254600       0.134500   -9999.000000
57871     57871     hunan          112.3667       26.9831          132       169     2012      08        09        222              0.000000      29.152679       0.602954       0.306340       0.220000   -9999.000000   -9999.000000       0.377000
57871     57871     hunan          112.3667       26.9831          132       169     2012      08        10        223              0.000000      29.154816       0.000000       0.304211       0.217000       0.274400   -9999.000000       0.367000
57871     57871     hunan          112.3667       26.9831          132       169     2012      08        11        224              0.000000      29.650757       3.917831       0.301047       0.203000   -9999.000000   -9999.000000   -9999.000000
57871     57871     hunan          112.3667       26.9831          132       169     2012      08        12        225              0.000000      29.990417      12.681919       0.303785       0.211000       0.241600       0.131500       0.419000
57871     57871     hunan          112.3667       26.9831          132       169     2012      08        13        226              0.000000      29.388184      21.840084       0.320543   -9999.000000       0.166000       0.174000   -9999.000000
57871     57871     hunan          112.3667       26.9831          132       169     2012      08        14        227              0.000000      29.299316       5.246758       0.336259   -9999.000000   -9999.000000       0.176900       0.593000
57871     57871     hunan          112.3667       26.9831          132       169     2012      08        15        228              0.000000      29.198486       0.000000       0.337087       0.236500       0.307200   -9999.000000       0.469000
57871     57871     hunan          112.3667       26.9831          132       169     2012      08        16        229              0.000000      30.114471       0.225980       0.313533       0.212500       0.240400   -9999.000000       0.316000
57871     57871     hunan          112.3667       26.9831          132       169     2012      08        17        230              0.000000      30.255951       1.343407       0.307021       0.231500       0.223200       0.180200       0.411000
57871     57871     hunan          112.3667       26.9831          132       169     2012      08        18        231              0.000000      29.928284       0.000000       0.307062   -9999.000000       0.221700       0.168800   -9999.000000
57871     57871     hunan          112.3667       26.9831          132       169     2012      08        19        232              0.000000      30.529388       0.000000       0.302226   -9999.000000   -9999.000000       0.176400       0.341000
57871     57871     hunan          112.3667       26.9831          132       169     2012      08        20        233              0.000000      30.949921       0.000000       0.298647       0.235000       0.258200       0.157700   -9999.000000
57871     57871     hunan          112.3667       26.9831          132       169     2012      08        21        234              0.000000      30.900482       8.011333       0.295696       0.274000       0.446200   -9999.000000   -9999.000000
57871     57871     hunan          112.3667       26.9831          132       169     2012      08        22        235              0.000000      27.848877       1.779653       0.307312       0.300500   -9999.000000   -9999.000000   -9999.000000
57871     57871     hunan          112.3667       26.9831          132       169     2012      08        23        236              0.000000      24.128357       1.348910       0.311106       0.296000       0.209300       0.185600   -9999.000000
57871     57871     hunan          112.3667       26.9831          132       169     2012      08        24        237              0.000000      23.226440       0.000000       0.308362   -9999.000000   -9999.000000       0.177000       0.369000
57871     57871     hunan          112.3667       26.9831          132       169     2012      08        25        238              0.000000      24.524689       0.000000       0.303363       0.272000       0.254700       0.166500   -9999.000000
57871     57871     hunan          112.3667       26.9831          132       169     2012      08        26        239              0.000000      25.949677       0.000000       0.299232       0.255000       0.169700   -9999.000000       0.251000
57871     57871     hunan          112.3667       26.9831          132       169     2012      08        27        240              0.000000      27.547333       0.000000       0.295842       0.230500   -9999.000000   -9999.000000       0.406000
57871     57871     hunan          112.3667       26.9831          132       169     2012      08        28        241              0.000000      26.573181       0.000000       0.293034       0.246000       0.271700   -9999.000000   -9999.000000
57871     57871     hunan          112.3667       26.9831          132       169     2012      08        29        242              0.000000      27.928192       0.000000       0.289448   -9999.000000   -9999.000000       0.164500       0.365000
57871     57871     hunan          112.3667       26.9831          132       169     2012      08        30        243              0.000000      29.019989       2.174922       0.286568   -9999.000000       0.235000       0.166400   -9999.000000
57871     57871     hunan          112.3667       26.9831          132       169     2012      08        31        244              0.000000      29.220306       0.000000       0.284280       0.233500       0.295800       0.154800       0.231000
57871     57871     hunan          112.3667       26.9831          132       169     2012      09        01        245              0.000000      29.678680       0.000000       0.281464       0.223000   -9999.000000   -9999.000000   -9999.000000
57871     57871     hunan          112.3667       26.9831          132       169     2012      09        02        246              0.000000      30.077209       0.663672       0.279074       0.240500       0.232400   -9999.000000       0.206000
57871     57871     hunan          112.3667       26.9831          132       169     2012      09        03        247              0.000000      28.424011       0.985782       0.278294       0.303000       0.268800       0.178100       0.254000
57871     57871     hunan          112.3667       26.9831          132       169     2012      09        04        248              0.000000      24.816223       0.000000       0.281282   -9999.000000       0.176400       0.171500   -9999.000000
57871     57871     hunan          112.3667       26.9831          132       169     2012      09        05        249              0.000000      26.248077       0.000000       0.279102       0.258000       0.279500       0.179400       0.213000
57871     57871     hunan          112.3667       26.9831          132       169     2012      09        06        250              0.000000      26.280273       0.000000       0.276101       0.233500   -9999.000000       0.169500   -9999.000000
57871     57871     hunan          112.3667       26.9831          132       169     2012      09        07        251              0.000000      28.009125       0.736366       0.274985       0.236500       0.276900   -9999.000000       0.390000
57871     57871     hunan          112.3667       26.9831          132       169     2012      09        08        252              0.000000      28.617706       0.000000       0.274707       0.210000       0.281200   -9999.000000       0.463000
57871     57871     hunan          112.3667       26.9831          132       169     2012      09        09        253              0.000000      28.891846       1.514471       0.272179   -9999.000000   -9999.000000       0.179100   -9999.000000
57871     57871     hunan          112.3667       26.9831          132       169     2012      09        10        254              0.000000      26.399658       0.543319       0.276747   -9999.000000       0.273600       0.197000       0.184000
57871     57871     hunan          112.3667       26.9831          132       169     2012      09        11        255              0.000000      26.573303      16.571556       0.281530       0.209000   -9999.000000       0.189600   -9999.000000
57871     57871     hunan          112.3667       26.9831          132       169     2012      09        12        256              0.000000      28.235321       5.302033       0.277344       0.200500       0.296200   -9999.000000       0.567000
57871     57871     hunan          112.3667       26.9831          132       169     2012      09        13        257              0.000000      25.600586       0.805477       0.283588       0.223500       0.301900   -9999.000000       0.489000
57871     57871     hunan          112.3667       26.9831          132       169     2012      09        14        258              0.000000      21.331909       0.114836       0.292871   -9999.000000   -9999.000000   -9999.000000       0.136000
57871     57871     hunan          112.3667       26.9831          132       169     2012      09        15        259              0.000000      21.883423       0.000000       0.283931   -9999.000000       0.218800       0.192500       0.367000
57871     57871     hunan          112.3667       26.9831          132       169     2012      09        16        260              0.000000      22.551483       0.000000       0.278622       0.227000   -9999.000000       0.197000   -9999.000000
57871     57871     hunan          112.3667       26.9831          132       169     2012      09        17        261              0.000000      22.754791       0.000000       0.276992       0.210000       0.311000       0.156600       0.250000
57871     57871     hunan          112.3667       26.9831          132       169     2012      09        18        262              0.000000      22.652191       0.686580       0.275810       0.200500       0.228600   -9999.000000   -9999.000000
57871     57871     hunan          112.3667       26.9831          132       169     2012      09        19        263              0.000000      23.542450       0.000000       0.273603       0.194000   -9999.000000   -9999.000000       0.151000
57871     57871     hunan          112.3667       26.9831          132       169     2012      09        20        264              0.000000      24.514008      25.081156       0.271356   -9999.000000       0.199600       0.192300       0.307000
57871     57871     hunan          112.3667       26.9831          132       169     2012      09        21        265              0.000000      23.149445       6.955134       0.308583   -9999.000000       0.222300       0.208300   -9999.000000
57871     57871     hunan          112.3667       26.9831          132       169     2012      09        22        266              0.000000      23.071228       4.069820       0.323178       0.268000       0.224000       0.184300       0.751000
57871     57871     hunan          112.3667       26.9831          132       169     2012      09        23        267              0.000000      22.411346      21.536423       0.318043       0.259500       0.188200   -9999.000000   -9999.000000
57871     57871     hunan          112.3667       26.9831          132       169     2012      09        24        268              0.000000      22.117950       2.739206       0.338252       0.262000   -9999.000000   -9999.000000       0.726000
57871     57871     hunan          112.3667       26.9831          132       169     2012      09        25        269              0.000000      22.269806       0.155878       0.323304   -9999.000000       0.295400   -9999.000000       0.805000
57871     57871     hunan          112.3667       26.9831          132       169     2012      09        26        270              0.000000      23.885956       0.157111       0.309475   -9999.000000       0.303800       0.241500   -9999.000000
57871     57871     hunan          112.3667       26.9831          132       169     2012      09        27        271              0.000000      24.260010       0.410900       0.302580       0.235500   -9999.000000       0.230000       0.532000
57871     57871     hunan          112.3667       26.9831          132       169     2012      09        28        272              0.000000      22.999115       0.111518       0.298693       0.208500   -9999.000000       0.216900   -9999.000000
57871     57871     hunan          112.3667       26.9831          132       169     2012      09        29        273              0.000000      22.500946       0.000000       0.291821       0.197500   -9999.000000   -9999.000000       0.228000
57871     57871     hunan          112.3667       26.9831          132       169     2012      09        30        274              0.000000      21.238708       4.896103       0.287585       0.197000   -9999.000000   -9999.000000   -9999.000000
57871     57871     hunan          112.3667       26.9831          132       169     2012      10        01        275              0.000000      21.531708       1.276293       0.285611   -9999.000000   -9999.000000   -9999.000000       0.437000
57871     57871     hunan          112.3667       26.9831          132       169     2012      10        02        276              0.000000      22.011810       0.682223       0.286404       0.173000   -9999.000000       0.146000       0.408000
57871     57871     hunan          112.3667       26.9831          132       169     2012      10        03        277              0.000000      22.753021       1.749279       0.284888       0.172000       0.286800       0.151800   -9999.000000
57871     57871     hunan          112.3667       26.9831          132       169     2012      10        04        278              0.000000      21.144165       0.773334       0.284808       0.176000   -9999.000000       0.145000       0.287000
57871     57871     hunan          112.3667       26.9831          132       169     2012      10        05        279              0.000000      20.460449       0.689150       0.285198       0.187000       0.314900   -9999.000000   -9999.000000
57871     57871     hunan          112.3667       26.9831          132       169     2012      10        06        280              0.000000      19.452362       0.000000       0.285759   -9999.000000       0.179400   -9999.000000       0.324000
57871     57871     hunan          112.3667       26.9831          132       169     2012      10        07        281              0.000000      18.882782       0.528064       0.286946   -9999.000000   -9999.000000       0.146200       0.398000
57871     57871     hunan          112.3667       26.9831          132       169     2012      10        08        282              0.000000      21.001160       7.414778       0.286795       0.175000       0.319500       0.121000   -9999.000000
57871     57871     hunan          112.3667       26.9831          132       169     2012      10        09        283              0.000000      21.427063       7.490206       0.294226       0.163500   -9999.000000       0.116400       0.284000
57871     57871     hunan          112.3667       26.9831          132       169     2012      10        10        284              0.000000      19.392487       6.368888       0.300850       0.159000       0.172500   -9999.000000   -9999.000000
57871     57871     hunan          112.3667       26.9831          132       169     2012      10        11        285              0.000000      21.001923       0.946228       0.298621   -9999.000000       0.081700   -9999.000000       0.322000
57871     57871     hunan          112.3667       26.9831          132       169     2012      10        12        286              0.293136      21.263245       0.000000       0.292666   -9999.000000   -9999.000000   -9999.000000       0.315000
57871     57871     hunan          112.3667       26.9831          132       169     2012      10        13        287              0.291333      21.764221       0.210719       0.287429       0.158000       0.219700       0.117300       0.194000
57871     57871     hunan          112.3667       26.9831          132       169     2012      10        14        288              0.288750      21.489594       0.000000       0.283966       0.150000   -9999.000000       0.117300       0.461000
57871     57871     hunan          112.3667       26.9831          132       169     2012      10        15        289              0.288958      20.610626       0.000000       0.283655       0.141500   -9999.000000       0.167400   -9999.000000
57871     57871     hunan          112.3667       26.9831          132       169     2012      10        16        290              0.310292      21.592377       7.664574       0.283297       0.148000       0.163400   -9999.000000       0.798000
57871     57871     hunan          112.3667       26.9831          132       169     2012      10        17        291              0.314417      20.155701       0.000000       0.301974   -9999.000000   -9999.000000   -9999.000000   -9999.000000
57871     57871     hunan          112.3667       26.9831          132       169     2012      10        18        292              0.310042      18.553589       0.000000       0.292652       0.146000       0.412200       0.173100       0.146000
57871     57871     hunan          112.3667       26.9831          132       169     2012      10        19        293              0.306333      19.497009       0.000000       0.287625       0.143000       0.312900       0.173800       0.328000
57871     57871     hunan          112.3667       26.9831          132       169     2012      10        20        294              0.304917      20.443146       0.000000       0.286540       0.128000   -9999.000000       0.172600   -9999.000000
57871     57871     hunan          112.3667       26.9831          132       169     2012      10        21        295              0.301625      23.224823       0.710114       0.284116       0.181000       0.418600       0.172600       0.396000
57871     57871     hunan          112.3667       26.9831          132       169     2012      10        22        296              0.296667      22.995239       4.416875       0.284215   -9999.000000   -9999.000000   -9999.000000   -9999.000000
57871     57871     hunan          112.3667       26.9831          132       169     2012      10        23        297              0.295375      17.788239       0.000000       0.297255   -9999.000000       0.386200   -9999.000000       0.255000
57871     57871     hunan          112.3667       26.9831          132       169     2012      10        24        298              0.295625      17.026917       0.000000       0.290500   -9999.000000       0.113000       0.105200       0.442000
57871     57871     hunan          112.3667       26.9831          132       169     2012      10        25        299              0.000000      19.231903       0.000000       0.286515       0.180000   -9999.000000       0.105400   -9999.000000
57871     57871     hunan          112.3667       26.9831          132       169     2012      10        26        300              0.293583      20.355194       0.803620       0.283992       0.172000       0.160300       0.102400       0.331000
57871     57871     hunan          112.3667       26.9831          132       169     2012      10        27        301              0.291875      21.543335       1.369596       0.282217       0.181000   -9999.000000   -9999.000000   -9999.000000
57871     57871     hunan          112.3667       26.9831          132       169     2012      10        28        302              0.000000      21.119080       3.589602       0.282143   -9999.000000       0.171800   -9999.000000       0.298000
57871     57871     hunan          112.3667       26.9831          132       169     2012      10        29        303              0.309083      19.471130      12.840432       0.290751       0.230000       0.103400   -9999.000000   -9999.000000
57871     57871     hunan          112.3667       26.9831          132       169     2012      10        30        304              0.316917      19.135223       1.073977       0.317005       0.190500   -9999.000000       0.161000       0.446000
57871     57871     hunan          112.3667       26.9831          132       169     2012      10        31        305              0.315000      17.839142       0.000000       0.304228       0.182500       0.201600       0.161500       0.507000
57871     57871     hunan          112.3667       26.9831          132       169     2012      11        01        306              0.312591      17.580841       0.000000       0.295688       0.155000       0.630700       0.155300   -9999.000000
57871     57871     hunan          112.3667       26.9831          132       169     2012      11        02        307              0.310158      16.864777       0.322364       0.292246   -9999.000000   -9999.000000   -9999.000000       0.269000
57871     57871     hunan          112.3667       26.9831          132       169     2012      11        03        308              0.306167      17.795441       1.385923       0.289058   -9999.000000       0.276900   -9999.000000   -9999.000000
57871     57871     hunan          112.3667       26.9831          132       169     2012      11        04        309              0.306917      15.809814       0.000000       0.292845       0.166500   -9999.000000       0.160900       0.330000
57871     57871     hunan          112.3667       26.9831          132       169     2012      11        05        310              0.304083      16.482910       1.602218       0.288415       0.169500       0.407100       0.153800       0.273000
57871     57871     hunan          112.3667       26.9831          132       169     2012      11        06        311              0.309458      16.128845      10.017744       0.289891       0.176000       0.370700       0.140100   -9999.000000
57871     57871     hunan          112.3667       26.9831          132       169     2012      11        07        312              0.363667      15.533417      37.919147       0.299717   -9999.000000   -9999.000000   -9999.000000       0.704000
57871     57871     hunan          112.3667       26.9831          132       169     2012      11        08        313              0.333700      14.020416      15.738588       0.352796   -9999.000000       0.312000   -9999.000000   -9999.000000
57871     57871     hunan          112.3667       26.9831          132       169     2012      11        09        314              0.326417      13.043182      10.728616       0.343745       0.237000   -9999.000000   -9999.000000       0.934000
57871     57871     hunan          112.3667       26.9831          132       169     2012      11        10        315              0.324292      13.234955       0.513490       0.332561       0.218500       0.293000       0.159800       0.948000
57871     57871     hunan          112.3667       26.9831          132       169     2012      11        11        316              0.322917      12.997803       0.000000       0.320391       0.161500   -9999.000000       0.157600       0.367000
57871     57871     hunan          112.3667       26.9831          132       169     2012      11        12        317              0.320250      13.942352       0.000000       0.310122       0.164000   -9999.000000       0.179400       0.572000
57871     57871     hunan          112.3667       26.9831          132       169     2012      11        13        318              0.000000      13.636230       0.000000       0.306860   -9999.000000       0.239900   -9999.000000   -9999.000000
57871     57871     hunan          112.3667       26.9831          132       169     2012      11        14        319              0.321292      15.494843      11.186893       0.304106       0.177000   -9999.000000   -9999.000000       0.638000
57871     57871     hunan          112.3667       26.9831          132       169     2012      11        15        320              0.323250      15.348175       4.246678       0.313313       0.197000       0.259000   -9999.000000   -9999.000000
57871     57871     hunan          112.3667       26.9831          132       169     2012      11        16        321              0.323917      13.402649      17.727646       0.323566   -9999.000000       0.210600       0.187300       0.850000
57871     57871     hunan          112.3667       26.9831          132       169     2012      11        17        322              0.000000      10.752380       0.000000       0.339143       0.163000   -9999.000000       0.183400       0.648000
57871     57871     hunan          112.3667       26.9831          132       169     2012      11        18        323              0.321125      11.656799       0.000000       0.318328   -9999.000000       0.206400       0.183900   -9999.000000
57871     57871     hunan          112.3667       26.9831          132       169     2012      11        19        324              0.321167      11.966675       0.000000       0.312918   -9999.000000       0.364500   -9999.000000       0.534000
57871     57871     hunan          112.3667       26.9831          132       169     2012      11        20        325              0.319957      13.294342       1.815348       0.310364       0.178000   -9999.000000   -9999.000000   -9999.000000
57871     57871     hunan          112.3667       26.9831          132       169     2012      11        21        326              0.322417      13.440369       0.356889       0.311435       0.181500       0.235900       0.126400       0.469000
57871     57871     hunan          112.3667       26.9831          132       169     2012      11        22        327              0.323208      12.401978       6.995045       0.313137       0.177000   -9999.000000       0.127900       0.655000
57871     57871     hunan          112.3667       26.9831          132       169     2012      11        23        328              0.321750      11.775421       0.000000       0.322013       0.188000       0.320100       0.129900       0.437000
57871     57871     hunan          112.3667       26.9831          132       169     2012      11        24        329              0.321000      10.629028       1.667592       0.312724   -9999.000000       0.400200   -9999.000000       0.481000
57871     57871     hunan          112.3667       26.9831          132       169     2012      11        25        330              0.322875      10.914154       0.722687       0.312277       0.177000   -9999.000000   -9999.000000   -9999.000000
57871     57871     hunan          112.3667       26.9831          132       169     2012      11        26        331              0.322625      10.139893       0.000000       0.313181       0.148000       0.395900   -9999.000000       0.395000
57871     57871     hunan          112.3667       26.9831          132       169     2012      11        27        332              0.320208      10.514008       1.138671       0.308822       0.172000   -9999.000000       0.111300   -9999.000000
57871     57871     hunan          112.3667       26.9831          132       169     2012      11        28        333              0.320667      10.213074       0.000000       0.309253       0.166000       0.427300       0.106700       0.449000
57871     57871     hunan          112.3667       26.9831          132       169     2012      11        29        334              0.319917      10.363953       1.560360       0.309620   -9999.000000       0.271900       0.109500       0.501000
57871     57871     hunan          112.3667       26.9831          132       169     2012      11        30        335              0.320833      10.242615      11.147452       0.309924   -9999.000000   -9999.000000   -9999.000000   -9999.000000
57871     57871     hunan          112.3667       26.9831          132       169     2012      12        01        336              0.323083       9.321686       1.976425       0.322594       0.181000       0.367200   -9999.000000       0.461000
57871     57871     hunan          112.3667       26.9831          132       169     2012      12        02        337              0.321417       9.019135       0.000000       0.322406       0.135000   -9999.000000       0.108700   -9999.000000
57871     57871     hunan          112.3667       26.9831          132       169     2012      12        03        338              0.320458       8.628784       1.279643       0.313690       0.153500       0.373000       0.112800       0.463000
57871     57871     hunan          112.3667       26.9831          132       169     2012      12        04        339              0.320000       8.853363       3.662896       0.311579   -9999.000000       0.339100       0.109300       0.459000
57871     57871     hunan          112.3667       26.9831          132       169     2012      12        05        340              0.321000       8.825958       2.168647       0.313778   -9999.000000   -9999.000000       0.101900   -9999.000000
57871     57871     hunan          112.3667       26.9831          132       169     2012      12        06        341              0.319792       9.796173       3.033849       0.310845       0.149000       0.232600   -9999.000000       0.380000
57871     57871     hunan          112.3667       26.9831          132       169     2012      12        07        342              0.319542      10.751129       5.041597       0.309652       0.144500   -9999.000000   -9999.000000   -9999.000000
57871     57871     hunan          112.3667       26.9831          132       169     2012      12        08        343              0.318000      11.956085       2.898538       0.309412       0.143000       0.427300       0.107200       0.372000
57871     57871     hunan          112.3667       26.9831          132       169     2012      12        09        344              0.321625      12.078003      20.073700       0.308665       0.167000       0.377400       0.120100       0.389000
57871     57871     hunan          112.3667       26.9831          132       169     2012      12        10        345              0.324250       9.041656       9.663832       0.329008   -9999.000000   -9999.000000       0.089900       0.685000
57871     57871     hunan          112.3667       26.9831          132       169     2012      12        11        346              0.321708       7.104980       0.000000       0.338256       0.172000       0.335000   -9999.000000       0.487000
57871     57871     hunan          112.3667       26.9831          132       169     2012      12        12        347              0.322208       7.008331       3.498426       0.320973       0.191000       0.302200   -9999.000000   -9999.000000
57871     57871     hunan          112.3667       26.9831          132       169     2012      12        13        348              0.323042       7.109314       0.541869       0.323497       0.161000   -9999.000000   -9999.000000       0.644000
57871     57871     hunan          112.3667       26.9831          132       169     2012      12        14        349              0.321500      10.067047       3.970109       0.317744       0.178500       0.422600       0.086500   -9999.000000
57871     57871     hunan          112.3667       26.9831          132       169     2012      12        15        350              0.000000      10.311249       1.455142       0.316503   -9999.000000   -9999.000000       0.086100       0.404000
57871     57871     hunan          112.3667       26.9831          132       169     2012      12        16        351              0.319000       7.746704       3.321868       0.314948   -9999.000000       0.431600       0.084500       0.423000
57871     57871     hunan          112.3667       26.9831          132       169     2012      12        17        352              0.321708       7.877319      11.485288       0.317347       0.201000       0.246500   -9999.000000   -9999.000000
57871     57871     hunan          112.3667       26.9831          132       169     2012      12        18        353              0.321708       6.568970       1.721971       0.331079   -9999.000000   -9999.000000   -9999.000000       0.519000
57871     57871     hunan          112.3667       26.9831          132       169     2012      12        19        354              0.321083       5.232849       3.487875       0.322296       0.202000       0.343200       0.099800   -9999.000000
57871     57871     hunan          112.3667       26.9831          132       169     2012      12        20        355              0.000000       5.376190      17.783699       0.321299       0.216000   -9999.000000       0.105200       0.682000
57871     57871     hunan          112.3667       26.9831          132       169     2012      12        21        356              0.322208       5.056580       0.811198       0.339385   -9999.000000       0.200600       0.100300       0.495000
57871     57871     hunan          112.3667       26.9831          132       169     2012      12        22        357              0.320917       4.268463       0.000000       0.328065   -9999.000000       0.356000       0.095400   -9999.000000
57871     57871     hunan          112.3667       26.9831          132       169     2012      12        23        358              0.320375       4.535339       0.000000       0.320874   -9999.000000   -9999.000000   -9999.000000       0.368000
57871     57871     hunan          112.3667       26.9831          132       169     2012      12        24        359              0.318389       4.603455       2.121241       0.316981       0.128000       0.292500   -9999.000000   -9999.000000
57871     57871     hunan          112.3667       26.9831          132       169     2012      12        25        360              0.317208       5.911407       0.420214       0.316036       0.150000       0.549000       0.098200       0.280000
57871     57871     hunan          112.3667       26.9831          132       169     2012      12        26        361              0.000000       4.712067      20.285797       0.315222   -9999.000000       0.565500       0.103900   -9999.000000
57871     57871     hunan          112.3667       26.9831          132       169     2012      12        27        362              0.322000       2.856659       3.982839       0.319361   -9999.000000       0.511400       0.099700       0.676000
57871     57871     hunan          112.3667       26.9831          132       169     2012      12        28        363              0.321000       3.543152      14.261156       0.324733   -9999.000000   -9999.000000   -9999.000000       0.680000
57871     57871     hunan          112.3667       26.9831          132       169     2012      12        29        364              0.000000       3.595856       6.495579       0.330649   -9999.000000   -9999.000000   -9999.000000   -9999.000000
57871     57871     hunan          112.3667       26.9831          132       169     2012      12        30        365              0.000000       3.807343       3.235581       0.329193   -9999.000000   -9999.000000   -9999.000000       0.259000
57871     57871     hunan          112.3667       26.9831          132       169     2012      12        31        366              0.319133       3.082764       0.168891       0.340416   -9999.000000   -9999.000000       0.105200   -9999.000000
