# Supplementary material for: Research on Fusing Multisatellite Soil Moisture Data Based on Bayesian Model Averaging
Source: Hindawi journal article supplement (doi:10.1155/2018/9310838), 2018-06-25
Supplement: f1 [file 9310838.f1.zip › 2012_sm00-10cm_daily_ZDB_ZHY_57872_366days_allin.txt]

57872     57872     hunan          112.3300       26.7700          133       169     2012      01        01        001              0.000000   -9999.000000       3.273495   -9999.000000       0.119000   -9999.000000       0.091300   -9999.000000
57872     57872     hunan          112.3300       26.7700          133       169     2012      01        02        002              0.248750       5.749451       4.533208       0.311173       0.136000       0.143600   -9999.000000       0.570000
57872     57872     hunan          112.3300       26.7700          133       169     2012      01        03        003              0.000000       5.375885       2.442997       0.317861       0.150000       0.059500   -9999.000000       0.660000
57872     57872     hunan          112.3300       26.7700          133       169     2012      01        04        004              0.290625       2.717377       0.358948       0.316239   -9999.000000       0.155700   -9999.000000   -9999.000000
57872     57872     hunan          112.3300       26.7700          133       169     2012      01        05        005              0.297333       3.651947       3.569301       0.310964   -9999.000000   -9999.000000       0.084100       0.710000
57872     57872     hunan          112.3300       26.7700          133       169     2012      01        06        006              0.298042       2.091278       0.241263       0.310971   -9999.000000   -9999.000000       0.084700   -9999.000000
57872     57872     hunan          112.3300       26.7700          133       169     2012      01        07        007              0.296333       3.044342       0.376475       0.309595       0.144000       0.097300       0.088400       0.378000
57872     57872     hunan          112.3300       26.7700          133       169     2012      01        08        008              0.000000       3.776703       0.531466       0.309095   -9999.000000       0.249500   -9999.000000       0.456000
57872     57872     hunan          112.3300       26.7700          133       169     2012      01        09        009              0.294000       4.132050       0.315130       0.307744   -9999.000000   -9999.000000   -9999.000000       0.313000
57872     57872     hunan          112.3300       26.7700          133       169     2012      01        10        010              0.292750       4.873688       5.567928       0.306773       0.130000       0.161300       0.064000       0.243000
57872     57872     hunan          112.3300       26.7700          133       169     2012      01        11        011              0.290750       5.340607       0.925242       0.306642       0.110000   -9999.000000       0.069900   -9999.000000
57872     57872     hunan          112.3300       26.7700          133       169     2012      01        12        012              0.291375       4.789856       1.948240       0.306147       0.115000       0.245400       0.071800       0.188000
57872     57872     hunan          112.3300       26.7700          133       169     2012      01        13        013              0.297083       5.117889       6.105978       0.307624       0.125000       0.385800   -9999.000000   -9999.000000
57872     57872     hunan          112.3300       26.7700          133       169     2012      01        14        014              0.309917       4.903748      23.357553       0.312723   -9999.000000   -9999.000000   -9999.000000       0.666000
57872     57872     hunan          112.3300       26.7700          133       169     2012      01        15        015              0.308875       4.317108      18.045565       0.337741   -9999.000000       0.150800   -9999.000000       0.953000
57872     57872     hunan          112.3300       26.7700          133       169     2012      01        16        016              0.300792       3.289398       0.000000       0.340176   -9999.000000   -9999.000000       0.073500   -9999.000000
57872     57872     hunan          112.3300       26.7700          133       169     2012      01        17        017              0.000000       4.012817       4.901672       0.324265       0.151000       0.175100       0.069800       0.520000
57872     57872     hunan          112.3300       26.7700          133       169     2012      01        18        018              0.307000       4.606079       6.390562       0.324761   -9999.000000       0.165800       0.072300   -9999.000000
57872     57872     hunan          112.3300       26.7700          133       169     2012      01        19        019              0.302091       4.000763       0.530831       0.328826   -9999.000000   -9999.000000   -9999.000000       0.618000
57872     57872     hunan          112.3300       26.7700          133       169     2012      01        20        020              0.302375       4.068817       0.850534       0.321186   -9999.000000       0.405500   -9999.000000       0.655000
57872     57872     hunan          112.3300       26.7700          133       169     2012      01        21        021              0.304208       4.060883       1.820872       0.318618   -9999.000000   -9999.000000   -9999.000000   -9999.000000
57872     57872     hunan          112.3300       26.7700          133       169     2012      01        22        022              0.302750       2.615021       0.343276       0.312157   -9999.000000   -9999.000000       0.075700       0.292000
57872     57872     hunan          112.3300       26.7700          133       169     2012      01        23        023              0.298708       1.360779       0.643861       0.290957   -9999.000000       0.341700       0.072500   -9999.000000
57872     57872     hunan          112.3300       26.7700          133       169     2012      01        24        024              0.299208       1.434601       0.155834       0.287974   -9999.000000   -9999.000000   -9999.000000       0.183000
57872     57872     hunan          112.3300       26.7700          133       169     2012      01        25        025              0.297542       1.329834       1.651248       0.278710   -9999.000000       0.391400   -9999.000000       0.371000
57872     57872     hunan          112.3300       26.7700          133       169     2012      01        26        026              0.297750       3.382782       0.139102       0.301197   -9999.000000       0.263500   -9999.000000       0.470000
57872     57872     hunan          112.3300       26.7700          133       169     2012      01        27        027              0.301500       2.217377       1.801644       0.304896       0.141500   -9999.000000       0.079200       0.500000
57872     57872     hunan          112.3300       26.7700          133       169     2012      01        28        028              0.302750       2.548340       0.746803       0.309368   -9999.000000       0.324400       0.072600   -9999.000000
57872     57872     hunan          112.3300       26.7700          133       169     2012      01        29        029              0.300042       4.110992       1.001297       0.310251   -9999.000000   -9999.000000       0.075400       0.426000
57872     57872     hunan          112.3300       26.7700          133       169     2012      01        30        030              0.297542       5.354553       0.992578       0.309711   -9999.000000       0.066100   -9999.000000   -9999.000000
57872     57872     hunan          112.3300       26.7700          133       169     2012      01        31        031              0.296333       4.492706       0.313743       0.307577   -9999.000000       0.440700   -9999.000000       0.378000
57872     57872     hunan          112.3300       26.7700          133       169     2012      02        01        032              0.295917       7.539307       1.868629       0.305637       0.134000   -9999.000000   -9999.000000       0.333000
57872     57872     hunan          112.3300       26.7700          133       169     2012      02        02        033              0.305708       6.214661       3.086643       0.307780   -9999.000000       0.229300       0.087400   -9999.000000
57872     57872     hunan          112.3300       26.7700          133       169     2012      02        03        034              0.303042       2.638275       1.836514       0.310222       0.155000   -9999.000000       0.094000       0.555000
57872     57872     hunan          112.3300       26.7700          133       169     2012      02        04        035              0.302708       3.465210       0.472271       0.310949   -9999.000000       0.218700       0.095000   -9999.000000
57872     57872     hunan          112.3300       26.7700          133       169     2012      02        05        036              0.303833       4.130707       4.773906       0.307930   -9999.000000       0.282800   -9999.000000       0.603000
57872     57872     hunan          112.3300       26.7700          133       169     2012      02        06        037              0.305667       5.037445       2.535422       0.314240       0.152000   -9999.000000   -9999.000000       0.686000
57872     57872     hunan          112.3300       26.7700          133       169     2012      02        07        038              0.300583       5.119263       1.484815       0.313995   -9999.000000       0.282600   -9999.000000   -9999.000000
57872     57872     hunan          112.3300       26.7700          133       169     2012      02        08        039              0.297333       4.214691       0.483471       0.307693   -9999.000000   -9999.000000       0.073700       0.475000
57872     57872     hunan          112.3300       26.7700          133       169     2012      02        09        040              0.297125       2.889923       0.328512       0.302722   -9999.000000       0.141900       0.068100   -9999.000000
57872     57872     hunan          112.3300       26.7700          133       169     2012      02        10        041              0.299208       2.107208       0.143023       0.298641   -9999.000000       0.173600       0.072800       0.381000
57872     57872     hunan          112.3300       26.7700          133       169     2012      02        11        042              0.297750       2.886475       0.697810       0.301265       0.147000   -9999.000000   -9999.000000   -9999.000000
57872     57872     hunan          112.3300       26.7700          133       169     2012      02        12        043              0.297375       4.114136       1.065204       0.303811       0.150000       0.230600   -9999.000000       0.547000
57872     57872     hunan          112.3300       26.7700          133       169     2012      02        13        044              0.298708       4.262390       1.081215       0.305133       0.151000       0.163300   -9999.000000       0.626000
57872     57872     hunan          112.3300       26.7700          133       169     2012      02        14        045              0.299167       5.070618       0.994888       0.305783   -9999.000000   -9999.000000       0.104600   -9999.000000
57872     57872     hunan          112.3300       26.7700          133       169     2012      02        15        046              0.297708       5.408478       0.348429       0.305068   -9999.000000       0.200500       0.108500       0.481000
57872     57872     hunan          112.3300       26.7700          133       169     2012      02        16        047              0.296583       4.568726       1.039770       0.304068   -9999.000000   -9999.000000   -9999.000000   -9999.000000
57872     57872     hunan          112.3300       26.7700          133       169     2012      02        17        048              0.295833       4.456299       0.478737       0.303014   -9999.000000       0.116800   -9999.000000       0.387000
57872     57872     hunan          112.3300       26.7700          133       169     2012      02        18        049              0.294292       5.288391       0.000000       0.301955       0.123000       0.282900   -9999.000000       0.411000
57872     57872     hunan          112.3300       26.7700          133       169     2012      02        19        050              0.294125       4.758179       1.829216       0.300401       0.123000   -9999.000000       0.098900   -9999.000000
57872     57872     hunan          112.3300       26.7700          133       169     2012      02        20        051              0.292125       9.187836       0.744930       0.297566   -9999.000000       0.148900       0.058400       0.399000
57872     57872     hunan          112.3300       26.7700          133       169     2012      02        21        052              0.290333      10.658356       1.076654       0.297855   -9999.000000   -9999.000000   -9999.000000   -9999.000000
57872     57872     hunan          112.3300       26.7700          133       169     2012      02        22        053              0.292417       9.761963       6.677913       0.301183       0.113000       0.157500   -9999.000000       0.365000
57872     57872     hunan          112.3300       26.7700          133       169     2012      02        23        054              0.316042       9.231384      10.600082       0.304544       0.123000       0.420400   -9999.000000       0.958000
57872     57872     hunan          112.3300       26.7700          133       169     2012      02        24        055              0.308625       8.786285       0.736786       0.324748       0.133500   -9999.000000       0.064700       0.676000
57872     57872     hunan          112.3300       26.7700          133       169     2012      02        25        056              0.304667       6.383392       0.271785       0.310416   -9999.000000       0.266300       0.068100       0.487000
57872     57872     hunan          112.3300       26.7700          133       169     2012      02        26        057              0.302042       4.815399       0.617475       0.305199   -9999.000000   -9999.000000       0.067400   -9999.000000
57872     57872     hunan          112.3300       26.7700          133       169     2012      02        27        058              0.301417       3.713654       0.968605       0.302801   -9999.000000       0.123000   -9999.000000       0.548000
57872     57872     hunan          112.3300       26.7700          133       169     2012      02        28        059              0.303125       4.366760       2.516371       0.303441       0.120000       0.277400   -9999.000000   -9999.000000
57872     57872     hunan          112.3300       26.7700          133       169     2012      02        29        060              0.000000   -9999.000000       1.225031   -9999.000000   -9999.000000   -9999.000000   -9999.000000   -9999.000000
57872     57872     hunan          112.3300       26.7700          133       169     2012      03        01        061              0.303458       7.077942       2.157375       0.305155       0.183000       0.337300       0.073500       0.558000
57872     57872     hunan          112.3300       26.7700          133       169     2012      03        02        062              0.305583       6.836334       2.970842       0.307462   -9999.000000       0.253400       0.064300   -9999.000000
57872     57872     hunan          112.3300       26.7700          133       169     2012      03        03        063              0.308833       6.267975       4.871818       0.308383       0.187000       0.517000       0.072400       0.716000
57872     57872     hunan          112.3300       26.7700          133       169     2012      03        04        064              0.317833       6.508392      43.680145       0.314228   -9999.000000       0.323800   -9999.000000   -9999.000000
57872     57872     hunan          112.3300       26.7700          133       169     2012      03        05        065              0.308542       5.555115       0.995173       0.351340   -9999.000000   -9999.000000   -9999.000000       0.718000
57872     57872     hunan          112.3300       26.7700          133       169     2012      03        06        066              0.310167       7.056396      13.240591       0.330418       0.205000       0.404000   -9999.000000       0.647000
57872     57872     hunan          112.3300       26.7700          133       169     2012      03        07        067              0.000000       6.260132       5.282398       0.340477   -9999.000000       0.369900       0.086500   -9999.000000
57872     57872     hunan          112.3300       26.7700          133       169     2012      03        08        068              0.304708       6.881256       6.888541       0.334955       0.184000   -9999.000000       0.080600       0.713000
57872     57872     hunan          112.3300       26.7700          133       169     2012      03        09        069              0.308083       6.181763       0.543930       0.330537   -9999.000000       0.190300       0.079900   -9999.000000
57872     57872     hunan          112.3300       26.7700          133       169     2012      03        10        070              0.302792       5.467773       0.911801       0.324692       0.162500   -9999.000000   -9999.000000       0.459000
57872     57872     hunan          112.3300       26.7700          133       169     2012      03        11        071              0.300292       8.032776       0.426072       0.320117       0.114000       0.244100   -9999.000000   -9999.000000
57872     57872     hunan          112.3300       26.7700          133       169     2012      03        12        072              0.298250       9.786682       1.548320       0.316307   -9999.000000       0.173500       0.060500       0.458000
57872     57872     hunan          112.3300       26.7700          133       169     2012      03        13        073              0.296625       9.640289       0.767676       0.315892   -9999.000000   -9999.000000       0.069600       0.461000
57872     57872     hunan          112.3300       26.7700          133       169     2012      03        14        074              0.295875      10.473694       9.092698       0.311841       0.125000       0.351500       0.068600   -9999.000000
57872     57872     hunan          112.3300       26.7700          133       169     2012      03        15        075              0.300083       9.910950       3.320491       0.321600       0.118500   -9999.000000       0.068100       0.531000
57872     57872     hunan          112.3300       26.7700          133       169     2012      03        16        076              0.299292      11.177277       0.661939       0.320462       0.120500       0.144500   -9999.000000   -9999.000000
57872     57872     hunan          112.3300       26.7700          133       169     2012      03        17        077              0.299375      11.549377       0.733495       0.315737   -9999.000000       0.501200   -9999.000000       0.557000
57872     57872     hunan          112.3300       26.7700          133       169     2012      03        18        078              0.306458      11.667999       3.426095       0.313707   -9999.000000   -9999.000000       0.067500       0.632000
57872     57872     hunan          112.3300       26.7700          133       169     2012      03        19        079              0.307125      13.030548       3.399705       0.316322       0.113000       0.537300       0.105800   -9999.000000
57872     57872     hunan          112.3300       26.7700          133       169     2012      03        20        080              0.305542      13.026367       0.312069       0.316923       0.119500   -9999.000000       0.105800       0.445000
57872     57872     hunan          112.3300       26.7700          133       169     2012      03        21        081              0.305208       9.721680       4.581915       0.311013       0.128000       0.021800   -9999.000000   -9999.000000
57872     57872     hunan          112.3300       26.7700          133       169     2012      03        22        082              0.308583      10.497925       6.118048       0.309001       0.138000       0.246500   -9999.000000       0.685000
57872     57872     hunan          112.3300       26.7700          133       169     2012      03        23        083              0.308708       9.769775       0.572457       0.316135   -9999.000000   -9999.000000   -9999.000000       0.686000
57872     57872     hunan          112.3300       26.7700          133       169     2012      03        24        084              0.303375      11.039856       3.768177       0.312455       0.115000       0.222300       0.090700       0.446000
57872     57872     hunan          112.3300       26.7700          133       169     2012      03        25        085              0.000000      14.737579       0.000000       0.304425       0.106000       0.206900       0.088500       0.597000
57872     57872     hunan          112.3300       26.7700          133       169     2012      03        26        086              0.295417      16.555176       0.890383       0.300985       0.102000   -9999.000000       0.112600   -9999.000000
57872     57872     hunan          112.3300       26.7700          133       169     2012      03        27        087              0.291708      17.809052       0.565264       0.298916       0.096000       0.097800   -9999.000000       0.409000
57872     57872     hunan          112.3300       26.7700          133       169     2012      03        28        088              0.296375      20.155640      19.858562       0.296542   -9999.000000   -9999.000000   -9999.000000   -9999.000000
57872     57872     hunan          112.3300       26.7700          133       169     2012      03        29        089              0.314250      18.742462       1.258515       0.319917   -9999.000000   -9999.000000       0.118400       0.714000
57872     57872     hunan          112.3300       26.7700          133       169     2012      03        30        090              0.312542      17.874451       6.117375       0.318123       0.130500       0.258400       0.132600       0.911000
57872     57872     hunan          112.3300       26.7700          133       169     2012      03        31        091              0.306167      15.548370       0.000000       0.319306       0.106000   -9999.000000       0.118800   -9999.000000
57872     57872     hunan          112.3300       26.7700          133       169     2012      04        01        092              0.300917      17.481293       0.000000       0.304922       0.120000       0.108100       0.123700       0.467000
57872     57872     hunan          112.3300       26.7700          133       169     2012      04        02        093              0.296000      20.089325       0.000000       0.300175   -9999.000000   -9999.000000   -9999.000000   -9999.000000
57872     57872     hunan          112.3300       26.7700          133       169     2012      04        03        094              0.287500      22.529602       0.000000       0.297540   -9999.000000       0.083700   -9999.000000       0.279000
57872     57872     hunan          112.3300       26.7700          133       169     2012      04        04        095              0.279833      20.386444       0.348892       0.293802       0.121000       0.433100       0.101900       0.372000
57872     57872     hunan          112.3300       26.7700          133       169     2012      04        05        096              0.277208      16.703217       1.473404       0.296355       0.116000   -9999.000000       0.094900       0.338000
57872     57872     hunan          112.3300       26.7700          133       169     2012      04        06        097              0.279250      16.227844       3.608383       0.299052       0.127500       0.400100       0.104800       0.527000
57872     57872     hunan          112.3300       26.7700          133       169     2012      04        07        098              0.290375      15.553802       4.774857       0.305836   -9999.000000       0.438800   -9999.000000   -9999.000000
57872     57872     hunan          112.3300       26.7700          133       169     2012      04        08        099              0.307375      16.732269       0.397635       0.307527   -9999.000000       0.194800   -9999.000000       0.552000
57872     57872     hunan          112.3300       26.7700          133       169     2012      04        09        100              0.305250      17.181641       0.418704       0.305062       0.119000       0.081900   -9999.000000   -9999.000000
57872     57872     hunan          112.3300       26.7700          133       169     2012      04        10        101              0.302542      19.419556       0.826798       0.300922       0.115500   -9999.000000       0.095600       0.444000
57872     57872     hunan          112.3300       26.7700          133       169     2012      04        11        102              0.298875      23.308044       0.432087       0.296666       0.150000       0.199700       0.097000       0.617000
57872     57872     hunan          112.3300       26.7700          133       169     2012      04        12        103              0.303042      20.917877       5.376874       0.296003       0.140000   -9999.000000       0.096000   -9999.000000
57872     57872     hunan          112.3300       26.7700          133       169     2012      04        13        104              0.307708      20.408386       0.324057       0.301892   -9999.000000   -9999.000000   -9999.000000       0.358000
57872     57872     hunan          112.3300       26.7700          133       169     2012      04        14        105              0.302708      18.767792       0.671938       0.296390       0.162000       0.286500   -9999.000000   -9999.000000
57872     57872     hunan          112.3300       26.7700          133       169     2012      04        15        106              0.299292      17.564453       0.067709       0.295084       0.155500   -9999.000000       0.085500       0.382000
57872     57872     hunan          112.3300       26.7700          133       169     2012      04        16        107              0.306417      16.533356       1.884237       0.293726       0.150500   -9999.000000       0.142900       0.488000
57872     57872     hunan          112.3300       26.7700          133       169     2012      04        17        108              0.317208      16.975891       6.778693       0.296229       0.166000       0.232600       0.165600   -9999.000000
57872     57872     hunan          112.3300       26.7700          133       169     2012      04        18        109              0.316542      17.295319       4.833758       0.304683   -9999.000000   -9999.000000   -9999.000000       0.646000
57872     57872     hunan          112.3300       26.7700          133       169     2012      04        19        110              0.316625      18.753754       4.912927       0.303125   -9999.000000       0.169900   -9999.000000   -9999.000000
57872     57872     hunan          112.3300       26.7700          133       169     2012      04        20        111              0.314583      19.779144       0.000000       0.305888       0.173000   -9999.000000   -9999.000000       0.814000
57872     57872     hunan          112.3300       26.7700          133       169     2012      04        21        112              0.307417      18.713409       0.000000       0.302903       0.150500       0.097200       0.143900       0.824000
57872     57872     hunan          112.3300       26.7700          133       169     2012      04        22        113              0.301125      21.426910       0.000000       0.292271       0.150000       0.145400       0.133700       0.460000
57872     57872     hunan          112.3300       26.7700          133       169     2012      04        23        114              0.311667      24.053101       4.724609       0.286315   -9999.000000   -9999.000000       0.178000       0.610000
57872     57872     hunan          112.3300       26.7700          133       169     2012      04        24        115              0.315542      22.942902       9.130248       0.300197   -9999.000000       0.565800   -9999.000000   -9999.000000
57872     57872     hunan          112.3300       26.7700          133       169     2012      04        25        116              0.000000      25.794647       1.342700       0.304480       0.197000       0.226300   -9999.000000       0.693000
57872     57872     hunan          112.3300       26.7700          133       169     2012      04        26        117              0.309208      17.495026       0.000000       0.302592       0.165500       0.106100   -9999.000000   -9999.000000
57872     57872     hunan          112.3300       26.7700          133       169     2012      04        27        118              0.304625      22.161591       0.000000       0.291721       0.157500       0.238300       0.162300       0.469000
57872     57872     hunan          112.3300       26.7700          133       169     2012      04        28        119              0.300917      23.688751       1.359570       0.288614       0.163000   -9999.000000       0.169800       0.629000
57872     57872     hunan          112.3300       26.7700          133       169     2012      04        29        120              0.302125      24.119904       0.792822       0.287526   -9999.000000       0.345900       0.154100   -9999.000000
57872     57872     hunan          112.3300       26.7700          133       169     2012      04        30        121              0.320917      24.066803       8.749219       0.287927       0.195000   -9999.000000   -9999.000000       0.839000
57872     57872     hunan          112.3300       26.7700          133       169     2012      05        01        122              0.317208      25.840729       2.697878       0.300739       0.278000   -9999.000000   -9999.000000   -9999.000000
57872     57872     hunan          112.3300       26.7700          133       169     2012      05        02        123              0.312792      21.952576       0.413649       0.305273       0.266000       0.430400       0.129800       0.653000
57872     57872     hunan          112.3300       26.7700          133       169     2012      05        03        124              0.314000      21.870911       1.510191       0.296624       0.270000   -9999.000000       0.148300       0.930000
57872     57872     hunan          112.3300       26.7700          133       169     2012      05        04        125              0.312958      21.097412       0.472904       0.297811   -9999.000000       0.419800       0.147900   -9999.000000
57872     57872     hunan          112.3300       26.7700          133       169     2012      05        05        126              0.310375      21.529694       5.241036       0.294192       0.242000   -9999.000000   -9999.000000       0.607000
57872     57872     hunan          112.3300       26.7700          133       169     2012      05        06        127              0.306417      24.570740       0.000000       0.289468       0.217000   -9999.000000   -9999.000000   -9999.000000
57872     57872     hunan          112.3300       26.7700          133       169     2012      05        07        128              0.300000      26.332825       0.000000       0.286152   -9999.000000       0.164500   -9999.000000       0.407000
57872     57872     hunan          112.3300       26.7700          133       169     2012      05        08        129              0.288667      28.553802       0.000000       0.280420       0.209500   -9999.000000       0.189300   -9999.000000
57872     57872     hunan          112.3300       26.7700          133       169     2012      05        09        130              0.290667      29.182190       9.051832       0.275385   -9999.000000       0.306100       0.216100       1.000000
57872     57872     hunan          112.3300       26.7700          133       169     2012      05        10        131              0.303542      26.324829       0.171297       0.298528   -9999.000000       0.235600       0.207300       0.787000
57872     57872     hunan          112.3300       26.7700          133       169     2012      05        11        132              0.300292      25.508179       0.428487       0.292339       0.233500   -9999.000000   -9999.000000   -9999.000000
57872     57872     hunan          112.3300       26.7700          133       169     2012      05        12        133              0.312667      26.966766      13.880177       0.287567       0.246000       0.205800   -9999.000000       0.804000
57872     57872     hunan          112.3300       26.7700          133       169     2012      05        13        134              0.318542      24.456085      10.518205       0.313481       0.266500   -9999.000000   -9999.000000   -9999.000000
57872     57872     hunan          112.3300       26.7700          133       169     2012      05        14        135              0.326833      21.598236       8.062373       0.307939   -9999.000000       0.149800       0.275600       0.684000
57872     57872     hunan          112.3300       26.7700          133       169     2012      05        15        136              0.314500      19.985840       0.000000       0.322130   -9999.000000       0.391000       0.244600       0.735000
57872     57872     hunan          112.3300       26.7700          133       169     2012      05        16        137              0.310542      21.864929       0.000000       0.302515       0.227000   -9999.000000       0.247000   -9999.000000
57872     57872     hunan          112.3300       26.7700          133       169     2012      05        17        138              0.305167      24.726929       1.500226       0.293640       0.210000       0.329000   -9999.000000       0.318000
57872     57872     hunan          112.3300       26.7700          133       169     2012      05        18        139              0.299750      26.324890       0.252095       0.292562       0.199000       0.177200   -9999.000000   -9999.000000
57872     57872     hunan          112.3300       26.7700          133       169     2012      05        19        140              0.291542      28.598663       0.717044       0.286198       0.196000   -9999.000000       0.232100       0.431000
57872     57872     hunan          112.3300       26.7700          133       169     2012      05        20        141              0.285917      25.262695       0.000000       0.288092   -9999.000000       0.237600       0.240300       0.440000
57872     57872     hunan          112.3300       26.7700          133       169     2012      05        21        142              0.277625      25.985199       0.238991       0.281658       0.305000   -9999.000000       0.149100       0.198000
57872     57872     hunan          112.3300       26.7700          133       169     2012      05        22        143              0.268375      26.445770       1.654583       0.278426       0.364500       0.432400   -9999.000000       0.197000
57872     57872     hunan          112.3300       26.7700          133       169     2012      05        23        144              0.284750      23.032410       1.761759       0.284610   -9999.000000   -9999.000000   -9999.000000   -9999.000000
57872     57872     hunan          112.3300       26.7700          133       169     2012      05        24        145              0.297375      22.241638       1.791343       0.291736       0.341000   -9999.000000   -9999.000000       0.832000
57872     57872     hunan          112.3300       26.7700          133       169     2012      05        25        146              0.000000      21.277283       2.390913       0.290260   -9999.000000       0.259300       0.177000   -9999.000000
57872     57872     hunan          112.3300       26.7700          133       169     2012      05        26        147              0.306750      20.298767       2.616664       0.297536   -9999.000000   -9999.000000       0.181900       0.895000
57872     57872     hunan          112.3300       26.7700          133       169     2012      05        27        148              0.310083      21.374115       2.378078       0.298059       0.372000       0.368000       0.176200       0.663000
57872     57872     hunan          112.3300       26.7700          133       169     2012      05        28        149              0.309542      23.075073       0.116039       0.298041       0.304000       0.166200   -9999.000000   -9999.000000
57872     57872     hunan          112.3300       26.7700          133       169     2012      05        29        150              0.318583      24.339294      19.436884       0.291994       0.331500   -9999.000000   -9999.000000       1.000000
57872     57872     hunan          112.3300       26.7700          133       169     2012      05        30        151              0.316375      25.702881       2.032232       0.317945   -9999.000000       0.337000       0.158000   -9999.000000
57872     57872     hunan          112.3300       26.7700          133       169     2012      05        31        152              0.313375      23.773346       2.583696       0.309057   -9999.000000   -9999.000000       0.186200   -9999.000000
57872     57872     hunan          112.3300       26.7700          133       169     2012      06        01        153              0.321917      24.239197       4.881592       0.301831       0.425000       0.384200       0.164300       0.964000
57872     57872     hunan          112.3300       26.7700          133       169     2012      06        02        154              0.314125      22.033417       0.000000       0.308559       0.383500       0.304000       0.168400       0.619000
57872     57872     hunan          112.3300       26.7700          133       169     2012      06        03        155              0.313958      22.932892       2.723431       0.298807       0.404500   -9999.000000   -9999.000000       0.942000
57872     57872     hunan          112.3300       26.7700          133       169     2012      06        04        156              0.318458      23.064819       0.979667       0.299863   -9999.000000       0.473500   -9999.000000   -9999.000000
57872     57872     hunan          112.3300       26.7700          133       169     2012      06        05        157              0.316417      22.675049       6.713423       0.300229   -9999.000000       0.606600       0.107100       0.774000
57872     57872     hunan          112.3300       26.7700          133       169     2012      06        06        158              0.322167      23.735931       1.264053       0.305017       0.407000   -9999.000000       0.098100   -9999.000000
57872     57872     hunan          112.3300       26.7700          133       169     2012      06        07        159              0.314750      25.681000       2.940882       0.305373       0.352000       0.427800       0.094500       0.898000
57872     57872     hunan          112.3300       26.7700          133       169     2012      06        08        160              0.311458      27.463623       1.041320       0.299864       0.353000   -9999.000000   -9999.000000       0.975000
57872     57872     hunan          112.3300       26.7700          133       169     2012      06        09        161              0.307125      28.297302       1.575133       0.298671       0.304000       0.410100   -9999.000000   -9999.000000
57872     57872     hunan          112.3300       26.7700          133       169     2012      06        10        162              0.316958      30.004822      55.251442       0.291009   -9999.000000       0.384300   -9999.000000       0.747000
57872     57872     hunan          112.3300       26.7700          133       169     2012      06        11        163              0.000000      28.920654       0.842930       0.330837       0.315000   -9999.000000       0.153600   -9999.000000
57872     57872     hunan          112.3300       26.7700          133       169     2012      06        12        164              0.315500      26.040466       0.000000       0.329758       0.269500       0.332800       0.134400       0.653000
57872     57872     hunan          112.3300       26.7700          133       169     2012      06        13        165              0.311542      28.453827       2.333632       0.310369       0.254000   -9999.000000       0.136100       0.850000
57872     57872     hunan          112.3300       26.7700          133       169     2012      06        14        166              0.306167      29.336517       1.784592       0.303021       0.234000       0.197200   -9999.000000   -9999.000000
57872     57872     hunan          112.3300       26.7700          133       169     2012      06        15        167              0.299000      28.632019       0.000000       0.303286   -9999.000000       0.209500   -9999.000000       0.423000
57872     57872     hunan          112.3300       26.7700          133       169     2012      06        16        168              0.290750      28.697052       2.434459       0.296274   -9999.000000   -9999.000000       0.125300   -9999.000000
57872     57872     hunan          112.3300       26.7700          133       169     2012      06        17        169              0.281958      29.136566       2.706659       0.292296       0.250500       0.245700       0.137200       0.941000
57872     57872     hunan          112.3300       26.7700          133       169     2012      06        18        170              0.276750      27.537720       0.000000       0.297824       0.214500   -9999.000000       0.084100       0.607000
57872     57872     hunan          112.3300       26.7700          133       169     2012      06        19        171              0.267875      28.381866       0.000000       0.292891       0.222500       0.161200       0.078800       0.554000
57872     57872     hunan          112.3300       26.7700          133       169     2012      06        20        172              0.260583      28.571381       0.000000       0.287948   -9999.000000       0.168800   -9999.000000       0.593000
57872     57872     hunan          112.3300       26.7700          133       169     2012      06        21        173              0.253917      29.575195       0.558062       0.283717   -9999.000000   -9999.000000   -9999.000000   -9999.000000
57872     57872     hunan          112.3300       26.7700          133       169     2012      06        22        174              0.248917      29.488770       0.488111       0.283369       0.238000       0.229900       0.081200       0.496000
57872     57872     hunan          112.3300       26.7700          133       169     2012      06        23        175              0.252542      28.393616       4.732090       0.284194       0.277500       0.504800       0.077300   -9999.000000
57872     57872     hunan          112.3300       26.7700          133       169     2012      06        24        176              0.261833      25.919952       1.186536       0.297163       0.255000   -9999.000000       0.081500       0.726000
57872     57872     hunan          112.3300       26.7700          133       169     2012      06        25        177              0.258375      28.153717       4.977298       0.290990   -9999.000000       0.329200   -9999.000000       0.651000
57872     57872     hunan          112.3300       26.7700          133       169     2012      06        26        178              0.254917      28.959808       0.900214       0.296061   -9999.000000   -9999.000000   -9999.000000   -9999.000000
57872     57872     hunan          112.3300       26.7700          133       169     2012      06        27        179              0.260583      28.216888       1.551985       0.294706       0.279000       0.202100   -9999.000000       0.800000
57872     57872     hunan          112.3300       26.7700          133       169     2012      06        28        180              0.264833      29.443146       0.675629       0.291381       0.247500       0.445600       0.145300   -9999.000000
57872     57872     hunan          112.3300       26.7700          133       169     2012      06        29        181              0.257500      29.864380       0.000000       0.287012       0.229500   -9999.000000       0.129400   -9999.000000
57872     57872     hunan          112.3300       26.7700          133       169     2012      06        30        182              0.249833      31.241974       0.967725       0.279231       0.205000       0.277900       0.132800   -9999.000000
57872     57872     hunan          112.3300       26.7700          133       169     2012      07        01        183              0.244167      30.828979       0.000000       0.273282   -9999.000000   -9999.000000   -9999.000000       0.442000
57872     57872     hunan          112.3300       26.7700          133       169     2012      07        02        184              0.239583      30.203674       0.000000       0.268546       0.306000       0.245400   -9999.000000       0.373000
57872     57872     hunan          112.3300       26.7700          133       169     2012      07        03        185              0.235875      30.348328       0.000000       0.265261       0.272000       0.126700       0.144400   -9999.000000
57872     57872     hunan          112.3300       26.7700          133       169     2012      07        04        186              0.232833      30.905579       0.000000       0.261590       0.256000   -9999.000000       0.152000       0.292000
57872     57872     hunan          112.3300       26.7700          133       169     2012      07        05        187              0.230000      31.295776       4.947701       0.258424       0.242000       0.240300       0.158400   -9999.000000
57872     57872     hunan          112.3300       26.7700          133       169     2012      07        06        188              0.228292      31.422363       4.843462       0.255670   -9999.000000   -9999.000000   -9999.000000       0.354000
57872     57872     hunan          112.3300       26.7700          133       169     2012      07        07        189              0.226542      31.554779       0.103061       0.253754   -9999.000000       0.071900   -9999.000000       0.420000
57872     57872     hunan          112.3300       26.7700          133       169     2012      07        08        190              0.224917      31.257050       0.000000       0.250597       0.271000       0.246200   -9999.000000   -9999.000000
57872     57872     hunan          112.3300       26.7700          133       169     2012      07        09        191              0.223458      31.505219       2.264151       0.246850       0.261500   -9999.000000       0.140000       0.169000
57872     57872     hunan          112.3300       26.7700          133       169     2012      07        10        192              0.221750      31.927063       0.000000       0.243421       0.262500       0.273700       0.134500   -9999.000000
57872     57872     hunan          112.3300       26.7700          133       169     2012      07        11        193              0.220667      31.649536       0.000000       0.241363   -9999.000000       0.428400       0.139600       0.272000
57872     57872     hunan          112.3300       26.7700          133       169     2012      07        12        194              0.219792      32.135406       0.000000       0.237826   -9999.000000   -9999.000000   -9999.000000       0.314000
57872     57872     hunan          112.3300       26.7700          133       169     2012      07        13        195              0.218708      31.828522       0.000000       0.234452       0.250000       0.186400   -9999.000000   -9999.000000
57872     57872     hunan          112.3300       26.7700          133       169     2012      07        14        196              0.246500      31.693481      77.002228       0.231698   -9999.000000   -9999.000000   -9999.000000       0.386000
57872     57872     hunan          112.3300       26.7700          133       169     2012      07        15        197              0.321542      28.811371      14.591527       0.317535       0.307000       0.312400       0.163700   -9999.000000
57872     57872     hunan          112.3300       26.7700          133       169     2012      07        16        198              0.318500      27.782715      35.886486       0.340655       0.265000       0.591100       0.181800       1.000000
57872     57872     hunan          112.3300       26.7700          133       169     2012      07        17        199              0.318083      28.149902      10.401493       0.348118   -9999.000000   -9999.000000       0.178700       1.000000
57872     57872     hunan          112.3300       26.7700          133       169     2012      07        18        200              0.318167      27.807648      21.381659       0.355635   -9999.000000       0.431000   -9999.000000       1.000000
57872     57872     hunan          112.3300       26.7700          133       169     2012      07        19        201              0.315167      28.384644       0.143487       0.363842       0.285000   -9999.000000   -9999.000000       0.723000
57872     57872     hunan          112.3300       26.7700          133       169     2012      07        20        202              0.308250      29.194366       8.829415       0.322436       0.296000       0.396200       0.183400   -9999.000000
57872     57872     hunan          112.3300       26.7700          133       169     2012      07        21        203              0.300826      30.169617       8.276636       0.321129       0.249000       0.193800       0.189000       0.489000
57872     57872     hunan          112.3300       26.7700          133       169     2012      07        22        204              0.291125      31.390076       1.283071       0.306208   -9999.000000   -9999.000000       0.179200   -9999.000000
57872     57872     hunan          112.3300       26.7700          133       169     2012      07        23        205              0.278875      31.347565       4.556027       0.302108   -9999.000000       0.265400   -9999.000000       0.527000
57872     57872     hunan          112.3300       26.7700          133       169     2012      07        24        206              0.267500      29.793457       0.135659       0.306228       0.253000   -9999.000000   -9999.000000       0.564000
57872     57872     hunan          112.3300       26.7700          133       169     2012      07        25        207              0.260417      29.267181       0.875755       0.299658       0.261000       0.238600   -9999.000000   -9999.000000
57872     57872     hunan          112.3300       26.7700          133       169     2012      07        26        208              0.254125      29.751556       0.757975       0.295939       0.253000       0.168600       0.167500       0.439000
57872     57872     hunan          112.3300       26.7700          133       169     2012      07        27        209              0.248833      29.843750       1.470359       0.292424       0.238000   -9999.000000       0.165000   -9999.000000
57872     57872     hunan          112.3300       26.7700          133       169     2012      07        28        210              0.249125      30.313873       0.642284       0.291379   -9999.000000       0.258300       0.174100       0.337000
57872     57872     hunan          112.3300       26.7700          133       169     2012      07        29        211              0.251708      30.268982       0.000000       0.289622       0.261000       0.356100   -9999.000000       0.431000
57872     57872     hunan          112.3300       26.7700          133       169     2012      07        30        212              0.245958      31.170776       0.718444       0.284132       0.237500       0.138000   -9999.000000       0.437000
57872     57872     hunan          112.3300       26.7700          133       169     2012      07        31        213              0.241625      31.416748       2.170918       0.281310       0.226000       0.241500   -9999.000000       0.340000
57872     57872     hunan          112.3300       26.7700          133       169     2012      08        01        214              0.237083      31.520660       1.291177       0.277865       0.250000   -9999.000000       0.209900   -9999.000000
57872     57872     hunan          112.3300       26.7700          133       169     2012      08        02        215              0.232875      31.781189       0.312526       0.277312   -9999.000000       0.193200       0.194400       0.243000
57872     57872     hunan          112.3300       26.7700          133       169     2012      08        03        216              0.229625      30.964325       0.000000       0.274423   -9999.000000       0.609000       0.198600   -9999.000000
57872     57872     hunan          112.3300       26.7700          133       169     2012      08        04        217              0.267292      30.182678      26.968849       0.269122       0.330000   -9999.000000   -9999.000000       0.966000
57872     57872     hunan          112.3300       26.7700          133       169     2012      08        05        218              0.303333      27.050293       3.503704       0.316249       0.285500       0.436600   -9999.000000       1.000000
57872     57872     hunan          112.3300       26.7700          133       169     2012      08        06        219              0.299542      26.442291       2.888106       0.315938       0.267000   -9999.000000       0.205600   -9999.000000
57872     57872     hunan          112.3300       26.7700          133       169     2012      08        07        220              0.294917      29.352142       0.431730       0.303565   -9999.000000       0.246600       0.190500       0.348000
57872     57872     hunan          112.3300       26.7700          133       169     2012      08        08        221              0.285458      30.068909       0.000000       0.292895   -9999.000000       0.094200       0.195400   -9999.000000
57872     57872     hunan          112.3300       26.7700          133       169     2012      08        09        222              0.274042      29.656219       1.666196       0.284366       0.249000   -9999.000000   -9999.000000       0.407000
57872     57872     hunan          112.3300       26.7700          133       169     2012      08        10        223              0.262583      29.346710       9.837806       0.286683       0.236000       0.205600   -9999.000000       0.529000
57872     57872     hunan          112.3300       26.7700          133       169     2012      08        11        224              0.253542      30.358551       1.090017       0.280161       0.241000   -9999.000000   -9999.000000   -9999.000000
57872     57872     hunan          112.3300       26.7700          133       169     2012      08        12        225              0.251250      30.821289       4.891065       0.278378       0.235000       0.078500       0.186400       0.344000
57872     57872     hunan          112.3300       26.7700          133       169     2012      08        13        226              0.318458      30.653687      27.528589       0.281993   -9999.000000       0.185000       0.230800   -9999.000000
57872     57872     hunan          112.3300       26.7700          133       169     2012      08        14        227              0.305458      29.516754       3.911273       0.323521   -9999.000000   -9999.000000       0.244800       0.598000
57872     57872     hunan          112.3300       26.7700          133       169     2012      08        15        228              0.297333      29.956085       0.000000       0.319187       0.253000       0.202800   -9999.000000       0.574000
57872     57872     hunan          112.3300       26.7700          133       169     2012      08        16        229              0.287375      30.747925       0.273041       0.298429       0.229000       0.500100   -9999.000000       0.461000
57872     57872     hunan          112.3300       26.7700          133       169     2012      08        17        230              0.274958      31.126373       0.966916       0.289201       0.241500       0.180800       0.236000       0.415000
57872     57872     hunan          112.3300       26.7700          133       169     2012      08        18        231              0.262500      30.753204       0.654349       0.286494   -9999.000000       0.188100       0.232300   -9999.000000
57872     57872     hunan          112.3300       26.7700          133       169     2012      08        19        232              0.253583      31.255127       0.000000       0.280215   -9999.000000   -9999.000000       0.235100       0.392000
57872     57872     hunan          112.3300       26.7700          133       169     2012      08        20        233              0.247083      31.673553       0.000000       0.274852       0.247000       0.229100       0.141500   -9999.000000
57872     57872     hunan          112.3300       26.7700          133       169     2012      08        21        234              0.241333      31.704742       8.749296       0.270717   -9999.000000       0.176900   -9999.000000   -9999.000000
57872     57872     hunan          112.3300       26.7700          133       169     2012      08        22        235              0.237125      28.620087       1.276988       0.296645       0.328500   -9999.000000   -9999.000000   -9999.000000
57872     57872     hunan          112.3300       26.7700          133       169     2012      08        23        236              0.237000      24.794800       0.816579       0.291556       0.317000       0.118200       0.160300   -9999.000000
57872     57872     hunan          112.3300       26.7700          133       169     2012      08        24        237              0.238250      23.943939       0.000000       0.290231   -9999.000000   -9999.000000       0.150700       0.493000
57872     57872     hunan          112.3300       26.7700          133       169     2012      08        25        238              0.000000      25.072113       0.000000       0.286567       0.289000       0.326500       0.146200   -9999.000000
57872     57872     hunan          112.3300       26.7700          133       169     2012      08        26        239              0.237125      26.649719       0.000000       0.283185       0.277000       0.118800   -9999.000000       0.395000
57872     57872     hunan          112.3300       26.7700          133       169     2012      08        27        240              0.234208      28.041809       0.000000       0.280235       0.251500   -9999.000000   -9999.000000       0.404000
57872     57872     hunan          112.3300       26.7700          133       169     2012      08        28        241              0.232417      27.143158       0.000000       0.277359       0.261500       0.241900   -9999.000000       0.268000
57872     57872     hunan          112.3300       26.7700          133       169     2012      08        29        242              0.229875      28.507263       0.000000       0.273126   -9999.000000   -9999.000000       0.140100       0.428000
57872     57872     hunan          112.3300       26.7700          133       169     2012      08        30        243              0.227292      29.529266       0.000000       0.269644   -9999.000000       0.167400       0.143200   -9999.000000
57872     57872     hunan          112.3300       26.7700          133       169     2012      08        31        244              0.225167      29.749207       0.000000       0.266987       0.256500       0.170600       0.139300       0.297000
57872     57872     hunan          112.3300       26.7700          133       169     2012      09        01        245              0.223250      30.575317       0.000000       0.263370       0.246500   -9999.000000   -9999.000000   -9999.000000
57872     57872     hunan          112.3300       26.7700          133       169     2012      09        02        246              0.221250      30.843201       4.635958       0.260224       0.259000       0.149000   -9999.000000       0.300000
57872     57872     hunan          112.3300       26.7700          133       169     2012      09        03        247              0.219833      29.838715       1.551116       0.263944       0.314000       0.153900       0.148000       0.437000
57872     57872     hunan          112.3300       26.7700          133       169     2012      09        04        248              0.221458      25.213226       0.000000       0.276901   -9999.000000       0.241200       0.155100   -9999.000000
57872     57872     hunan          112.3300       26.7700          133       169     2012      09        05        249              0.221917      26.703003       0.000000       0.269750       0.273000       0.229800       0.157500       0.192000
57872     57872     hunan          112.3300       26.7700          133       169     2012      09        06        250              0.221292      27.287994       0.176918       0.263793       0.249000   -9999.000000       0.153700   -9999.000000
57872     57872     hunan          112.3300       26.7700          133       169     2012      09        07        251              0.219958      28.918854       0.229374       0.260478       0.254500       0.223600   -9999.000000       0.419000
57872     57872     hunan          112.3300       26.7700          133       169     2012      09        08        252              0.218750      29.360901       0.000000       0.259424       0.223000       0.367400   -9999.000000       0.419000
57872     57872     hunan          112.3300       26.7700          133       169     2012      09        09        253              0.217292      29.770569       8.470170       0.256339   -9999.000000   -9999.000000       0.162200   -9999.000000
57872     57872     hunan          112.3300       26.7700          133       169     2012      09        10        254              0.215917      27.949219       0.491536       0.270957   -9999.000000       0.280600       0.198700       0.279000
57872     57872     hunan          112.3300       26.7700          133       169     2012      09        11        255              0.215958      27.453278       0.184284       0.283041       0.222000   -9999.000000       0.209100   -9999.000000
57872     57872     hunan          112.3300       26.7700          133       169     2012      09        12        256              0.223333      28.787994       5.898510       0.272543       0.228000       0.233800   -9999.000000       0.764000
57872     57872     hunan          112.3300       26.7700          133       169     2012      09        13        257              0.234000      27.086700       0.903760       0.277770       0.246000       0.283900   -9999.000000       0.536000
57872     57872     hunan          112.3300       26.7700          133       169     2012      09        14        258              0.231083      21.957581       0.866619       0.280242   -9999.000000   -9999.000000   -9999.000000       0.480000
57872     57872     hunan          112.3300       26.7700          133       169     2012      09        15        259              0.227792      22.856995       0.000000       0.272999   -9999.000000       0.169500       0.202000       0.416000
57872     57872     hunan          112.3300       26.7700          133       169     2012      09        16        260              0.224792      23.593353       0.159781       0.266311       0.245000   -9999.000000       0.215200   -9999.000000
57872     57872     hunan          112.3300       26.7700          133       169     2012      09        17        261              0.222208      23.625183       0.000000       0.263742       0.232000       0.175600       0.174400       0.246000
57872     57872     hunan          112.3300       26.7700          133       169     2012      09        18        262              0.221458      23.486542       0.457500       0.262162       0.215500       0.277000   -9999.000000   -9999.000000
57872     57872     hunan          112.3300       26.7700          133       169     2012      09        19        263              0.219958      24.648743       0.858906       0.259134       0.213000   -9999.000000   -9999.000000       0.206000
57872     57872     hunan          112.3300       26.7700          133       169     2012      09        20        264              0.229167      25.533386      18.864048       0.255873   -9999.000000       0.172000       0.186900       0.291000
57872     57872     hunan          112.3300       26.7700          133       169     2012      09        21        265              0.262708      23.793549       3.422724       0.297209   -9999.000000       0.179700       0.221400   -9999.000000
57872     57872     hunan          112.3300       26.7700          133       169     2012      09        22        266              0.271875      24.299866       3.538692       0.300591       0.268500       0.184600       0.203200       0.851000
57872     57872     hunan          112.3300       26.7700          133       169     2012      09        23        267              0.295625      23.068237      24.132072       0.300011       0.305000       0.202400   -9999.000000   -9999.000000
57872     57872     hunan          112.3300       26.7700          133       169     2012      09        24        268              0.299917      22.654846       2.700052       0.331609       0.273500   -9999.000000   -9999.000000       0.943000
57872     57872     hunan          112.3300       26.7700          133       169     2012      09        25        269              0.294208      22.839874       0.964892       0.312543   -9999.000000       0.317800   -9999.000000       0.781000
57872     57872     hunan          112.3300       26.7700          133       169     2012      09        26        270              0.290292      24.574615       0.976882       0.300505   -9999.000000       0.391800       0.195100       0.746000
57872     57872     hunan          112.3300       26.7700          133       169     2012      09        27        271              0.287286      24.965668       0.000000       0.293092       0.245500   -9999.000000       0.175100       0.559000
57872     57872     hunan          112.3300       26.7700          133       169     2012      09        28        272              0.279267      23.353210       0.709448       0.289193       0.227500   -9999.000000       0.178000   -9999.000000
57872     57872     hunan          112.3300       26.7700          133       169     2012      09        29        273              0.274375      23.155823       0.000000       0.280712       0.206500   -9999.000000   -9999.000000       0.289000
57872     57872     hunan          112.3300       26.7700          133       169     2012      09        30        274              0.267125      21.942963       1.921360       0.275763       0.198000       0.227800   -9999.000000   -9999.000000
57872     57872     hunan          112.3300       26.7700          133       169     2012      10        01        275              0.259500      22.153595       0.299745       0.273797   -9999.000000       0.341900   -9999.000000       0.471000
57872     57872     hunan          112.3300       26.7700          133       169     2012      10        02        276              0.253542      22.834778       0.000000       0.271143       0.184000   -9999.000000       0.149700       0.448000
57872     57872     hunan          112.3300       26.7700          133       169     2012      10        03        277              0.248500      23.434174       0.000000       0.268496       0.182500       0.241100       0.153800   -9999.000000
57872     57872     hunan          112.3300       26.7700          133       169     2012      10        04        278              0.244958      22.410004       0.000000       0.268889       0.188500   -9999.000000       0.153900       0.234000
57872     57872     hunan          112.3300       26.7700          133       169     2012      10        05        279              0.242333      21.319611       0.000000       0.270064       0.196000       0.181200   -9999.000000   -9999.000000
57872     57872     hunan          112.3300       26.7700          133       169     2012      10        06        280              0.240917      20.599823       1.257841       0.270593   -9999.000000       0.206200   -9999.000000       0.364000
57872     57872     hunan          112.3300       26.7700          133       169     2012      10        07        281              0.240833      19.685699       1.433240       0.272873   -9999.000000   -9999.000000       0.149600       0.399000
57872     57872     hunan          112.3300       26.7700          133       169     2012      10        08        282              0.238708      22.220032      18.354790       0.276552       0.182500       0.289300       0.109600   -9999.000000
57872     57872     hunan          112.3300       26.7700          133       169     2012      10        09        283              0.236042      22.384155      18.697542       0.304799       0.177000   -9999.000000       0.107200       0.217000
57872     57872     hunan          112.3300       26.7700          133       169     2012      10        10        284              0.235792      20.121277      15.508701       0.320147       0.175000       0.330000   -9999.000000   -9999.000000
57872     57872     hunan          112.3300       26.7700          133       169     2012      10        11        285              0.233917      21.707184       1.228776       0.316739   -9999.000000       0.236800   -9999.000000       0.354000
57872     57872     hunan          112.3300       26.7700          133       169     2012      10        12        286              0.232500      21.953918       0.126258       0.302504   -9999.000000   -9999.000000   -9999.000000       0.414000
57872     57872     hunan          112.3300       26.7700          133       169     2012      10        13        287              0.230333      22.587555       0.000000       0.290929       0.176000       0.158900       0.106800       0.306000
57872     57872     hunan          112.3300       26.7700          133       169     2012      10        14        288              0.228042      22.604919       0.365354       0.285469       0.165500       0.119400       0.106900       0.323000
57872     57872     hunan          112.3300       26.7700          133       169     2012      10        15        289              0.227583      21.309937       0.000000       0.284366       0.156000   -9999.000000       0.168000   -9999.000000
57872     57872     hunan          112.3300       26.7700          133       169     2012      10        16        290              0.227833      22.352234       4.860035       0.282968       0.158000       0.122700   -9999.000000       0.839000
57872     57872     hunan          112.3300       26.7700          133       169     2012      10        17        291              0.229750      21.215088       0.000000       0.292511   -9999.000000   -9999.000000   -9999.000000   -9999.000000
57872     57872     hunan          112.3300       26.7700          133       169     2012      10        18        292              0.229042      19.445251       4.959672       0.285303       0.162000       0.269100       0.156600       0.251000
57872     57872     hunan          112.3300       26.7700          133       169     2012      10        19        293              0.228292      20.343567       0.000000       0.281109       0.158500       0.365300       0.164800       0.476000
57872     57872     hunan          112.3300       26.7700          133       169     2012      10        20        294              0.227750      21.585327       0.303940       0.280591       0.142500   -9999.000000       0.155100   -9999.000000
57872     57872     hunan          112.3300       26.7700          133       169     2012      10        21        295              0.226348      24.266571       1.001355       0.278574       0.178500       0.258200       0.167700       0.453000
57872     57872     hunan          112.3300       26.7700          133       169     2012      10        22        296              0.223458      24.126770       1.861829       0.278356   -9999.000000   -9999.000000   -9999.000000   -9999.000000
57872     57872     hunan          112.3300       26.7700          133       169     2012      10        23        297              0.223292      18.801300       0.000000       0.283708   -9999.000000       0.374300   -9999.000000       0.243000
57872     57872     hunan          112.3300       26.7700          133       169     2012      10        24        298              0.224250      17.835052       0.904979       0.281124   -9999.000000       0.320800       0.113500       0.488000
57872     57872     hunan          112.3300       26.7700          133       169     2012      10        25        299              0.000000      19.932495       0.000000       0.278166       0.186500   -9999.000000       0.116200       0.303000
57872     57872     hunan          112.3300       26.7700          133       169     2012      10        26        300              0.223083      21.365051       0.237364       0.276165       0.181000       0.166400       0.112900       0.372000
57872     57872     hunan          112.3300       26.7700          133       169     2012      10        27        301              0.221583      22.671295       1.542485       0.274374       0.186000   -9999.000000   -9999.000000   -9999.000000
57872     57872     hunan          112.3300       26.7700          133       169     2012      10        28        302              0.000000      22.009216       3.316950       0.275307   -9999.000000       0.113200   -9999.000000       0.396000
57872     57872     hunan          112.3300       26.7700          133       169     2012      10        29        303              0.247458      20.188629      10.969952       0.283867       0.240000       0.159200   -9999.000000   -9999.000000
57872     57872     hunan          112.3300       26.7700          133       169     2012      10        30        304              0.269833      19.888702       0.000000       0.307777       0.205500   -9999.000000       0.175300       0.606000
57872     57872     hunan          112.3300       26.7700          133       169     2012      10        31        305              0.266792      18.141113       0.000000       0.295460       0.194500       0.268400       0.156700       0.615000
57872     57872     hunan          112.3300       26.7700          133       169     2012      11        01        306              0.263958      18.112305       0.498389       0.287097       0.166000       0.443600       0.168900   -9999.000000
57872     57872     hunan          112.3300       26.7700          133       169     2012      11        02        307              0.261500      16.964020       0.000000       0.283993   -9999.000000   -9999.000000   -9999.000000       0.200000
57872     57872     hunan          112.3300       26.7700          133       169     2012      11        03        308              0.258542      18.332733       0.713991       0.280900   -9999.000000       0.183300   -9999.000000   -9999.000000
57872     57872     hunan          112.3300       26.7700          133       169     2012      11        04        309              0.258042      16.509674       0.000000       0.283465       0.178500   -9999.000000       0.157200       0.325000
57872     57872     hunan          112.3300       26.7700          133       169     2012      11        05        310              0.256250      17.171478       1.157403       0.279924       0.183000       0.164200       0.148700       0.390000
57872     57872     hunan          112.3300       26.7700          133       169     2012      11        06        311              0.254167      16.905731      14.629158       0.280522       0.186000       0.316900       0.122000   -9999.000000
57872     57872     hunan          112.3300       26.7700          133       169     2012      11        07        312              0.292417      16.264801      36.750370       0.294511   -9999.000000   -9999.000000   -9999.000000       0.945000
57872     57872     hunan          112.3300       26.7700          133       169     2012      11        08        313              0.295682      14.358063      17.713621       0.347954   -9999.000000       0.367800   -9999.000000   -9999.000000
57872     57872     hunan          112.3300       26.7700          133       169     2012      11        09        314              0.297500      13.390594      25.926910       0.337415       0.260000   -9999.000000   -9999.000000       0.987000
57872     57872     hunan          112.3300       26.7700          133       169     2012      11        10        315              0.293833      13.554382       1.562993       0.339098       0.237000       0.280800       0.163800       1.000000
57872     57872     hunan          112.3300       26.7700          133       169     2012      11        11        316              0.287833      13.439331       1.138301       0.343456       0.174500       0.360800       0.163100       0.534000
57872     57872     hunan          112.3300       26.7700          133       169     2012      11        12        317              0.285417      14.355652       0.207685       0.319991       0.171000   -9999.000000       0.196100       0.566000
57872     57872     hunan          112.3300       26.7700          133       169     2012      11        13        318              0.000000      14.469543       0.000000       0.311996   -9999.000000       0.479100   -9999.000000   -9999.000000
57872     57872     hunan          112.3300       26.7700          133       169     2012      11        14        319              0.284458      16.251251       8.848460       0.307055   -9999.000000   -9999.000000   -9999.000000       0.691000
57872     57872     hunan          112.3300       26.7700          133       169     2012      11        15        320              0.291375      15.554138       0.465766       0.312580       0.200000       0.585800   -9999.000000   -9999.000000
57872     57872     hunan          112.3300       26.7700          133       169     2012      11        16        321              0.295250      13.920502      14.221834       0.314912   -9999.000000       0.338800       0.199800       0.965000
57872     57872     hunan          112.3300       26.7700          133       169     2012      11        17        322              0.000000      11.280365       0.000000       0.328274       0.169000   -9999.000000       0.194500       0.699000
57872     57872     hunan          112.3300       26.7700          133       169     2012      11        18        323              0.285792      12.016113       0.000000       0.313247   -9999.000000       0.201100       0.190100   -9999.000000
57872     57872     hunan          112.3300       26.7700          133       169     2012      11        19        324              0.285292      12.576111       0.402151       0.308608   -9999.000000       0.471800   -9999.000000       0.557000
57872     57872     hunan          112.3300       26.7700          133       169     2012      11        20        325              0.285000      14.084961       2.971595       0.305756       0.180000   -9999.000000   -9999.000000   -9999.000000
57872     57872     hunan          112.3300       26.7700          133       169     2012      11        21        326              0.296167      14.344818       5.040735       0.307899       0.198500       0.191500       0.153800       0.604000
57872     57872     hunan          112.3300       26.7700          133       169     2012      11        22        327              0.293292      12.940582       5.221817       0.314450       0.194500   -9999.000000       0.144200       0.741000
57872     57872     hunan          112.3300       26.7700          133       169     2012      11        23        328              0.288917      12.225128       0.473696       0.316648       0.190000       0.420000       0.151700       0.529000
57872     57872     hunan          112.3300       26.7700          133       169     2012      11        24        329              0.286583      11.104156       0.382582       0.308294   -9999.000000       0.397500   -9999.000000       0.682000
57872     57872     hunan          112.3300       26.7700          133       169     2012      11        25        330              0.290167      11.403290       2.591419       0.305901       0.189000   -9999.000000   -9999.000000   -9999.000000
57872     57872     hunan          112.3300       26.7700          133       169     2012      11        26        331              0.289000      10.581421       0.000000       0.308951       0.161000       0.204100   -9999.000000       0.497000
57872     57872     hunan          112.3300       26.7700          133       169     2012      11        27        332              0.286083      11.326385       0.163804       0.303691       0.185000   -9999.000000       0.125300   -9999.000000
57872     57872     hunan          112.3300       26.7700          133       169     2012      11        28        333              0.285042      11.238800       0.000000       0.302466       0.176000       0.281400       0.109200       0.534000
57872     57872     hunan          112.3300       26.7700          133       169     2012      11        29        334              0.284958      10.879517       1.358842       0.302153   -9999.000000       0.454600       0.126500       0.549000
57872     57872     hunan          112.3300       26.7700          133       169     2012      11        30        335              0.288417      11.309784       4.436254       0.302901   -9999.000000   -9999.000000   -9999.000000   -9999.000000
57872     57872     hunan          112.3300       26.7700          133       169     2012      12        01        336              0.290958      10.025726       0.896124       0.308316       0.187000       0.355000   -9999.000000       0.474000
57872     57872     hunan          112.3300       26.7700          133       169     2012      12        02        337              0.287125       9.537354       0.430220       0.308157       0.155000   -9999.000000       0.120400   -9999.000000
57872     57872     hunan          112.3300       26.7700          133       169     2012      12        03        338              0.285333       9.199127       0.000000       0.303170       0.166000       0.258300       0.116300       0.485000
57872     57872     hunan          112.3300       26.7700          133       169     2012      12        04        339              0.284208       9.532166       0.050566       0.301436   -9999.000000       0.442200       0.102000       0.577000
57872     57872     hunan          112.3300       26.7700          133       169     2012      12        05        340              0.284250       9.270691       0.791832       0.300826   -9999.000000   -9999.000000       0.110500   -9999.000000
57872     57872     hunan          112.3300       26.7700          133       169     2012      12        06        341              0.282875      10.669281       0.000000       0.298690   -9999.000000       0.261400   -9999.000000       0.388000
57872     57872     hunan          112.3300       26.7700          133       169     2012      12        07        342              0.282417      11.580109       0.000000       0.297412       0.161000       0.683100   -9999.000000   -9999.000000
57872     57872     hunan          112.3300       26.7700          133       169     2012      12        08        343              0.281000      12.937714       0.000000       0.296433       0.157500   -9999.000000       0.109000       0.373000
57872     57872     hunan          112.3300       26.7700          133       169     2012      12        09        344              0.281375      13.078949       6.662451       0.295276       0.179000       0.214000       0.122700       0.410000
57872     57872     hunan          112.3300       26.7700          133       169     2012      12        10        345              0.294167       9.489166       7.006639       0.306653   -9999.000000   -9999.000000       0.098800       0.804000
57872     57872     hunan          112.3300       26.7700          133       169     2012      12        11        346              0.289542       7.539154       0.000000       0.317413       0.190000       0.292500   -9999.000000       0.542000
57872     57872     hunan          112.3300       26.7700          133       169     2012      12        12        347              0.288417       7.403595       0.905649       0.304778       0.201000       0.154100   -9999.000000   -9999.000000
57872     57872     hunan          112.3300       26.7700          133       169     2012      12        13        348              0.288750       7.432495       0.381455       0.303965       0.177000   -9999.000000   -9999.000000       0.766000
57872     57872     hunan          112.3300       26.7700          133       169     2012      12        14        349              0.286583      11.378845       0.000000       0.300933       0.191500       0.468400       0.093500   -9999.000000
57872     57872     hunan          112.3300       26.7700          133       169     2012      12        15        350              0.000000      11.721924       0.000000       0.298942   -9999.000000   -9999.000000       0.083800       0.464000
57872     57872     hunan          112.3300       26.7700          133       169     2012      12        16        351              0.284125       8.163177       0.141228       0.298391   -9999.000000       0.528700       0.094200       0.459000
57872     57872     hunan          112.3300       26.7700          133       169     2012      12        17        352              0.294833       8.187408       7.407916       0.297952       0.208000       0.244400   -9999.000000   -9999.000000
57872     57872     hunan          112.3300       26.7700          133       169     2012      12        18        353              0.291083       6.956299       0.692398       0.311854   -9999.000000   -9999.000000   -9999.000000       0.684000
57872     57872     hunan          112.3300       26.7700          133       169     2012      12        19        354              0.288333       5.795074       0.262873       0.304182       0.223000       0.413400       0.099600   -9999.000000
57872     57872     hunan          112.3300       26.7700          133       169     2012      12        20        355              0.000000       5.986115      10.423846       0.300683       0.228000   -9999.000000       0.108800       0.807000
57872     57872     hunan          112.3300       26.7700          133       169     2012      12        21        356              0.291333       5.439056       0.088857       0.318333   -9999.000000       0.243200       0.108400       0.500000
57872     57872     hunan          112.3300       26.7700          133       169     2012      12        22        357              0.287292       4.868439       0.000000       0.308178   -9999.000000       0.429000       0.108200       0.446000
57872     57872     hunan          112.3300       26.7700          133       169     2012      12        23        358              0.285042       4.915924       0.000000       0.302942       0.149000   -9999.000000   -9999.000000       0.297000
57872     57872     hunan          112.3300       26.7700          133       169     2012      12        24        359              0.283056       5.275208       2.908792       0.299176       0.143000       0.228200   -9999.000000   -9999.000000
57872     57872     hunan          112.3300       26.7700          133       169     2012      12        25        360              0.282333       6.686829       5.963997       0.305435       0.156000       0.413500       0.126000       0.323000
57872     57872     hunan          112.3300       26.7700          133       169     2012      12        26        361              0.000000       5.372162      21.026634       0.301108   -9999.000000       0.423800       0.125900   -9999.000000
57872     57872     hunan          112.3300       26.7700          133       169     2012      12        27        362              0.297583       3.518646       2.454523       0.306423   -9999.000000       0.216600       0.133600       0.607000
57872     57872     hunan          112.3300       26.7700          133       169     2012      12        28        363              0.291000       3.604187      11.203888       0.316970       0.199000   -9999.000000   -9999.000000       0.752000
57872     57872     hunan          112.3300       26.7700          133       169     2012      12        29        364              0.000000       3.526886       6.580639       0.325274   -9999.000000   -9999.000000   -9999.000000   -9999.000000
57872     57872     hunan          112.3300       26.7700          133       169     2012      12        30        365              0.000000       2.933228       2.542870       0.327312   -9999.000000   -9999.000000   -9999.000000       0.230000
57872     57872     hunan          112.3300       26.7700          133       169     2012      12        31        366              0.287071       2.973358       4.010769       0.318406   -9999.000000   -9999.000000       0.151100   -9999.000000
