# Supplementary material for: Research on Fusing Multisatellite Soil Moisture Data Based on Bayesian Model Averaging
Source: Hindawi journal article supplement (doi:10.1155/2018/9310838), 2018-06-25
Supplement: f1 [file 9310838.f1.zip › 2012_sm00-10cm_daily_ZDB_ZHY_57882_366days_allin.txt]

57882     57882     hunan          113.7500       27.0797          132       175     2012      01        01        001              0.000000   -9999.000000       0.000000   -9999.000000       0.122500   -9999.000000       0.084000   -9999.000000
57882     57882     hunan          113.7500       27.0797          132       175     2012      01        02        002              0.242292       5.209412       2.602219       0.299483       0.138500       0.109900   -9999.000000   -9999.000000
57882     57882     hunan          113.7500       27.0797          132       175     2012      01        03        003              0.000000       5.634735       4.969818       0.297655       0.161000       0.126600   -9999.000000       0.395000
57882     57882     hunan          113.7500       27.0797          132       175     2012      01        04        004              0.317417       3.313660       2.855999       0.301885   -9999.000000   -9999.000000   -9999.000000   -9999.000000
57882     57882     hunan          113.7500       27.0797          132       175     2012      01        05        005              0.343250       3.610107       4.859107       0.294826       0.128000   -9999.000000       0.072400       0.460000
57882     57882     hunan          113.7500       27.0797          132       175     2012      01        06        006              0.340583       2.431641       0.492176       0.297367       0.130000   -9999.000000       0.069500   -9999.000000
57882     57882     hunan          113.7500       27.0797          132       175     2012      01        07        007              0.333417       2.905029       0.000000       0.295743       0.133000   -9999.000000       0.070000       0.170000
57882     57882     hunan          113.7500       27.0797          132       175     2012      01        08        008              0.000000       4.028107       0.000000       0.292860   -9999.000000   -9999.000000   -9999.000000       0.145000
57882     57882     hunan          113.7500       27.0797          132       175     2012      01        09        009              0.322708       3.809692       0.000000       0.289779   -9999.000000   -9999.000000   -9999.000000   -9999.000000
57882     57882     hunan          113.7500       27.0797          132       175     2012      01        10        010              0.318083       4.689789       0.000000       0.288616   -9999.000000       0.100600   -9999.000000       0.225000
57882     57882     hunan          113.7500       27.0797          132       175     2012      01        11        011              0.312958       5.124176       0.000000       0.287863       0.102000   -9999.000000       0.056000   -9999.000000
57882     57882     hunan          113.7500       27.0797          132       175     2012      01        12        012              0.313208       5.177399       1.947857       0.287291       0.104000   -9999.000000       0.061500       0.201000
57882     57882     hunan          113.7500       27.0797          132       175     2012      01        13        013              0.329875       5.638855       1.468232       0.289094       0.115000       0.098100       0.062600       0.569000
57882     57882     hunan          113.7500       27.0797          132       175     2012      01        14        014              0.371500       5.348663      22.374557       0.291635   -9999.000000   -9999.000000   -9999.000000   -9999.000000
57882     57882     hunan          113.7500       27.0797          132       175     2012      01        15        015              0.386458       4.655365       6.811041       0.314958   -9999.000000       0.098900   -9999.000000       0.727000
57882     57882     hunan          113.7500       27.0797          132       175     2012      01        16        016              0.351125       3.591034       0.963494       0.308829       0.106000   -9999.000000       0.061300   -9999.000000
57882     57882     hunan          113.7500       27.0797          132       175     2012      01        17        017              0.000000       3.638031       2.042971       0.298396       0.113000       0.174400       0.065900       0.328000
57882     57882     hunan          113.7500       27.0797          132       175     2012      01        18        018              0.370583       4.868927       3.628412       0.297201       0.138000       0.166000       0.065900       0.678000
57882     57882     hunan          113.7500       27.0797          132       175     2012      01        19        019              0.358542       4.228424       1.694384       0.300496   -9999.000000   -9999.000000   -9999.000000       0.472000
57882     57882     hunan          113.7500       27.0797          132       175     2012      01        20        020              0.354042       4.510773       2.082634       0.296282   -9999.000000       0.053000   -9999.000000       0.607000
57882     57882     hunan          113.7500       27.0797          132       175     2012      01        21        021              0.363667       4.620972       1.517192       0.295713   -9999.000000       0.103400   -9999.000000   -9999.000000
57882     57882     hunan          113.7500       27.0797          132       175     2012      01        22        022              0.355958       3.352631       0.498975       0.290920   -9999.000000   -9999.000000       0.058000       0.310000
57882     57882     hunan          113.7500       27.0797          132       175     2012      01        23        023              0.343042       1.920349       0.000000       0.270969   -9999.000000   -9999.000000       0.054800   -9999.000000
57882     57882     hunan          113.7500       27.0797          132       175     2012      01        24        024              0.344000       1.585022       0.245253       0.253839   -9999.000000   -9999.000000   -9999.000000       0.156000
57882     57882     hunan          113.7500       27.0797          132       175     2012      01        25        025              0.336917       1.328644       1.126789       0.243300   -9999.000000       0.193900   -9999.000000       0.427000
57882     57882     hunan          113.7500       27.0797          132       175     2012      01        26        026              0.335542       2.211792       0.190001       0.259000   -9999.000000   -9999.000000   -9999.000000   -9999.000000
57882     57882     hunan          113.7500       27.0797          132       175     2012      01        27        027              0.346333       1.889099       1.831120       0.255696       0.133000   -9999.000000   -9999.000000       0.499000
57882     57882     hunan          113.7500       27.0797          132       175     2012      01        28        028              0.348500       2.147522       0.203983       0.263355   -9999.000000       0.254800       0.051300   -9999.000000
57882     57882     hunan          113.7500       27.0797          132       175     2012      01        29        029              0.340667       2.455048       0.000000       0.266904       0.128000   -9999.000000       0.049500       0.295000
57882     57882     hunan          113.7500       27.0797          132       175     2012      01        30        030              0.334667       3.272095       0.000000       0.277716   -9999.000000       0.090600       0.051300       0.233000
57882     57882     hunan          113.7500       27.0797          132       175     2012      01        31        031              0.331000       3.159088       0.000000       0.279991   -9999.000000       0.080100   -9999.000000   -9999.000000
57882     57882     hunan          113.7500       27.0797          132       175     2012      02        01        032              0.329708       4.977600       0.605744       0.283183       0.129500   -9999.000000   -9999.000000       0.292000
57882     57882     hunan          113.7500       27.0797          132       175     2012      02        02        033              0.358417       5.798553       1.814964       0.284680   -9999.000000       0.109500       0.051500   -9999.000000
57882     57882     hunan          113.7500       27.0797          132       175     2012      02        03        034              0.347917       3.034271       0.259651       0.285152       0.138000   -9999.000000       0.055000       0.287000
57882     57882     hunan          113.7500       27.0797          132       175     2012      02        04        035              0.348542       3.612885       0.748307       0.283617       0.159000       0.149800       0.056800   -9999.000000
57882     57882     hunan          113.7500       27.0797          132       175     2012      02        05        036              0.349792       4.298737       0.759021       0.285991   -9999.000000       0.175200   -9999.000000       0.468000
57882     57882     hunan          113.7500       27.0797          132       175     2012      02        06        037              0.364167       6.509399       4.116379       0.284856       0.140000   -9999.000000   -9999.000000       0.625000
57882     57882     hunan          113.7500       27.0797          132       175     2012      02        07        038              0.350333       4.654083       0.589428       0.292855   -9999.000000       0.093900   -9999.000000   -9999.000000
57882     57882     hunan          113.7500       27.0797          132       175     2012      02        08        039              0.338292       4.110352       0.000000       0.285532   -9999.000000       0.143700       0.050500       0.260000
57882     57882     hunan          113.7500       27.0797          132       175     2012      02        09        040              0.332250       3.147736       0.275789       0.278944   -9999.000000   -9999.000000       0.055700   -9999.000000
57882     57882     hunan          113.7500       27.0797          132       175     2012      02        10        041              0.334875       2.368591       0.330799       0.272097   -9999.000000       0.208500       0.050300       0.198000
57882     57882     hunan          113.7500       27.0797          132       175     2012      02        11        042              0.331833       2.139404       0.000000       0.267675       0.137000   -9999.000000   -9999.000000       0.361000
57882     57882     hunan          113.7500       27.0797          132       175     2012      02        12        043              0.328708       3.432190       0.000000       0.275809       0.124000   -9999.000000   -9999.000000   -9999.000000
57882     57882     hunan          113.7500       27.0797          132       175     2012      02        13        044              0.324708       5.493469       0.000000       0.279419       0.123000       0.134200   -9999.000000       0.251000
57882     57882     hunan          113.7500       27.0797          132       175     2012      02        14        045              0.320750       6.858215       0.000000       0.279117       0.137000   -9999.000000       0.080000   -9999.000000
57882     57882     hunan          113.7500       27.0797          132       175     2012      02        15        046              0.316500       6.737946       0.161700       0.278396   -9999.000000       0.332700       0.069800       0.280000
57882     57882     hunan          113.7500       27.0797          132       175     2012      02        16        047              0.315167       4.906647       0.593916       0.278227   -9999.000000   -9999.000000       0.069300       0.510000
57882     57882     hunan          113.7500       27.0797          132       175     2012      02        17        048              0.313875       4.338959       0.000000       0.277791   -9999.000000       0.137200   -9999.000000       0.218000
57882     57882     hunan          113.7500       27.0797          132       175     2012      02        18        049              0.309583       5.175446       0.000000       0.276720       0.118000       0.119800   -9999.000000       0.147000
57882     57882     hunan          113.7500       27.0797          132       175     2012      02        19        050              0.308000       4.470215       0.000000       0.275241       0.122000   -9999.000000       0.066100   -9999.000000
57882     57882     hunan          113.7500       27.0797          132       175     2012      02        20        051              0.304208       8.418915       0.549660       0.272802   -9999.000000       0.064200       0.061800       0.271000
57882     57882     hunan          113.7500       27.0797          132       175     2012      02        21        052              0.299958       9.069427       0.599144       0.272846   -9999.000000   -9999.000000   -9999.000000   -9999.000000
57882     57882     hunan          113.7500       27.0797          132       175     2012      02        22        053              0.297917      10.172211       8.117698       0.272499   -9999.000000       0.275400   -9999.000000       0.267000
57882     57882     hunan          113.7500       27.0797          132       175     2012      02        23        054              0.355750       9.130920      17.331060       0.282441       0.125500   -9999.000000   -9999.000000       0.807000
57882     57882     hunan          113.7500       27.0797          132       175     2012      02        24        055              0.362500       8.140778       1.887262       0.313584       0.132000   -9999.000000   -9999.000000   -9999.000000
57882     57882     hunan          113.7500       27.0797          132       175     2012      02        25        056              0.353458       6.609344       0.297871       0.294697   -9999.000000       0.163300       0.074000       0.529000
57882     57882     hunan          113.7500       27.0797          132       175     2012      02        26        057              0.349375       5.115814      16.045490       0.286869   -9999.000000   -9999.000000       0.070500   -9999.000000
57882     57882     hunan          113.7500       27.0797          132       175     2012      02        27        058              0.356500       4.137115       3.597725       0.282496   -9999.000000   -9999.000000   -9999.000000       0.305000
57882     57882     hunan          113.7500       27.0797          132       175     2012      02        28        059              0.352000       3.859802       5.521521       0.287157       0.113500       0.309700   -9999.000000       0.387000
57882     57882     hunan          113.7500       27.0797          132       175     2012      02        29        060              0.000000   -9999.000000       1.892695   -9999.000000       0.106000   -9999.000000   -9999.000000   -9999.000000
57882     57882     hunan          113.7500       27.0797          132       175     2012      03        01        061              0.347375       6.468628       2.273012       0.288994       0.177000       0.137700       0.063400       0.500000
57882     57882     hunan          113.7500       27.0797          132       175     2012      03        02        062              0.356833       6.562836       3.533699       0.293034   -9999.000000   -9999.000000       0.060800   -9999.000000
57882     57882     hunan          113.7500       27.0797          132       175     2012      03        03        063              0.354083       6.003693       6.202981       0.292918   -9999.000000   -9999.000000       0.061900       0.578000
57882     57882     hunan          113.7500       27.0797          132       175     2012      03        04        064              0.387542       6.288605      36.173325       0.299012   -9999.000000       0.462400       0.069200   -9999.000000
57882     57882     hunan          113.7500       27.0797          132       175     2012      03        05        065              0.384417       6.168915       3.776523       0.329019       0.153000   -9999.000000   -9999.000000       0.672000
57882     57882     hunan          113.7500       27.0797          132       175     2012      03        06        066              0.391708       6.691895       8.708338       0.309971       0.166000   -9999.000000   -9999.000000       0.731000
57882     57882     hunan          113.7500       27.0797          132       175     2012      03        07        067              0.000000       6.536804       2.828588       0.309871   -9999.000000       0.205700       0.066800   -9999.000000
57882     57882     hunan          113.7500       27.0797          132       175     2012      03        08        068              0.370042       6.821564       4.240494       0.302761   -9999.000000   -9999.000000       0.065800       0.628000
57882     57882     hunan          113.7500       27.0797          132       175     2012      03        09        069              0.373583       6.023041       1.299597       0.302525       0.149000       0.163600       0.070400   -9999.000000
57882     57882     hunan          113.7500       27.0797          132       175     2012      03        10        070              0.354625       5.467926       0.880414       0.299125       0.140000   -9999.000000   -9999.000000       0.379000
57882     57882     hunan          113.7500       27.0797          132       175     2012      03        11        071              0.345750       6.550903       0.000000       0.295163       0.111000       0.185400   -9999.000000       0.472000
57882     57882     hunan          113.7500       27.0797          132       175     2012      03        12        072              0.339458       7.940460       0.273247       0.292092   -9999.000000       0.281800   -9999.000000   -9999.000000
57882     57882     hunan          113.7500       27.0797          132       175     2012      03        13        073              0.336292       9.029266       0.000000       0.289563   -9999.000000   -9999.000000       0.051200       0.373000
57882     57882     hunan          113.7500       27.0797          132       175     2012      03        14        074              0.334250       9.129761       0.329155       0.288323       0.108000       0.178300       0.054700   -9999.000000
57882     57882     hunan          113.7500       27.0797          132       175     2012      03        15        075              0.335500       9.423920       0.220267       0.288021       0.105000   -9999.000000       0.049300       0.442000
57882     57882     hunan          113.7500       27.0797          132       175     2012      03        16        076              0.330833      11.881073       0.000000       0.287982       0.107000   -9999.000000   -9999.000000       0.517000
57882     57882     hunan          113.7500       27.0797          132       175     2012      03        17        077              0.329292      13.128326       0.346378       0.286000       0.101000       0.164500   -9999.000000       0.421000
57882     57882     hunan          113.7500       27.0797          132       175     2012      03        18        078              0.346667      12.399750       0.661050       0.286500   -9999.000000   -9999.000000       0.053500       0.769000
57882     57882     hunan          113.7500       27.0797          132       175     2012      03        19        079              0.352667      13.617859       0.028191       0.286861       0.104000   -9999.000000       0.081500   -9999.000000
57882     57882     hunan          113.7500       27.0797          132       175     2012      03        20        080              0.342375      14.123962       0.056204       0.284925       0.114500       0.042700       0.079900       0.412000
57882     57882     hunan          113.7500       27.0797          132       175     2012      03        21        081              0.338042      10.662628       0.423304       0.283490       0.097500   -9999.000000       0.077900   -9999.000000
57882     57882     hunan          113.7500       27.0797          132       175     2012      03        22        082              0.334333      12.340546       9.515925       0.283311       0.108000       0.271500   -9999.000000       0.503000
57882     57882     hunan          113.7500       27.0797          132       175     2012      03        23        083              0.355083      11.336700       3.179154       0.294737   -9999.000000   -9999.000000   -9999.000000       0.642000
57882     57882     hunan          113.7500       27.0797          132       175     2012      03        24        084              0.344875      10.118347       4.084701       0.297497   -9999.000000   -9999.000000   -9999.000000   -9999.000000
57882     57882     hunan          113.7500       27.0797          132       175     2012      03        25        085              0.000000      13.587067       0.245417       0.284309       0.083000       0.118400       0.072600       0.319000
57882     57882     hunan          113.7500       27.0797          132       175     2012      03        26        086              0.322458      15.181000       0.349702       0.279079       0.081000   -9999.000000       0.094700   -9999.000000
57882     57882     hunan          113.7500       27.0797          132       175     2012      03        27        087              0.312542      16.578369       0.365651       0.276601       0.080000       0.259900   -9999.000000       0.307000
57882     57882     hunan          113.7500       27.0797          132       175     2012      03        28        088              0.311875      17.972595       4.624593       0.274742   -9999.000000   -9999.000000   -9999.000000       0.376000
57882     57882     hunan          113.7500       27.0797          132       175     2012      03        29        089              0.360333      17.935883       4.193185       0.280741   -9999.000000       0.142000   -9999.000000   -9999.000000
57882     57882     hunan          113.7500       27.0797          132       175     2012      03        30        090              0.353792      15.958282       6.046154       0.290271       0.101500   -9999.000000       0.099100       0.620000
57882     57882     hunan          113.7500       27.0797          132       175     2012      03        31        091              0.348208      14.998810       0.421092       0.293593       0.078500   -9999.000000       0.090600   -9999.000000
57882     57882     hunan          113.7500       27.0797          132       175     2012      04        01        092              0.334625      16.755829       0.000000       0.281918       0.118000       0.144500       0.097400       0.392000
57882     57882     hunan          113.7500       27.0797          132       175     2012      04        02        093              0.323458      18.277527       3.325489       0.275572       0.118000   -9999.000000   -9999.000000   -9999.000000
57882     57882     hunan          113.7500       27.0797          132       175     2012      04        03        094              0.308292      20.606781       1.282969       0.271623   -9999.000000   -9999.000000   -9999.000000       0.244000
57882     57882     hunan          113.7500       27.0797          132       175     2012      04        04        095              0.297125      19.185944       1.139464       0.267764       0.125000       0.286200       0.095100       0.574000
57882     57882     hunan          113.7500       27.0797          132       175     2012      04        05        096              0.301833      15.778992       0.191738       0.271767       0.120000   -9999.000000       0.084700   -9999.000000
57882     57882     hunan          113.7500       27.0797          132       175     2012      04        06        097              0.313500      15.691864       0.586091       0.272606       0.123500       0.554400       0.084100       0.373000
57882     57882     hunan          113.7500       27.0797          132       175     2012      04        07        098              0.336833      15.405640       4.783752       0.273511       0.123000   -9999.000000       0.077800   -9999.000000
57882     57882     hunan          113.7500       27.0797          132       175     2012      04        08        099              0.368167      17.272461       1.634924       0.277390   -9999.000000   -9999.000000   -9999.000000       0.587000
57882     57882     hunan          113.7500       27.0797          132       175     2012      04        09        100              0.354083      16.147430       0.122605       0.283490       0.115000       0.140800   -9999.000000       0.694000
57882     57882     hunan          113.7500       27.0797          132       175     2012      04        10        101              0.344417      17.652710       3.598823       0.275728       0.123500   -9999.000000       0.065000   -9999.000000
57882     57882     hunan          113.7500       27.0797          132       175     2012      04        11        102              0.331917      20.790649      14.051137       0.277900       0.153500   -9999.000000       0.069900       0.644000
57882     57882     hunan          113.7500       27.0797          132       175     2012      04        12        103              0.349625      19.413452       5.527299       0.301258       0.155500   -9999.000000       0.073700   -9999.000000
57882     57882     hunan          113.7500       27.0797          132       175     2012      04        13        104              0.359708      18.694824       1.345919       0.291229   -9999.000000   -9999.000000   -9999.000000       0.368000
57882     57882     hunan          113.7500       27.0797          132       175     2012      04        14        105              0.351417      15.757019       0.920533       0.285255   -9999.000000       0.152300   -9999.000000       0.677000
57882     57882     hunan          113.7500       27.0797          132       175     2012      04        15        106              0.351375      15.716034       2.153059       0.281164       0.173500   -9999.000000   -9999.000000       0.721000
57882     57882     hunan          113.7500       27.0797          132       175     2012      04        16        107              0.361458      15.248077       0.745845       0.283073       0.153500       0.416100       0.134700       0.809000
57882     57882     hunan          113.7500       27.0797          132       175     2012      04        17        108              0.383167      15.761200      11.533382       0.278169       0.180000       0.208400       0.149900   -9999.000000
57882     57882     hunan          113.7500       27.0797          132       175     2012      04        18        109              0.391208      15.953613      14.508130       0.300030   -9999.000000   -9999.000000   -9999.000000       0.693000
57882     57882     hunan          113.7500       27.0797          132       175     2012      04        19        110              0.375625      17.049805       6.745074       0.309726   -9999.000000       0.196700   -9999.000000   -9999.000000
57882     57882     hunan          113.7500       27.0797          132       175     2012      04        20        111              0.365292      17.859985       4.382726       0.302080       0.151000   -9999.000000   -9999.000000       0.714000
57882     57882     hunan          113.7500       27.0797          132       175     2012      04        21        112              0.350708      17.752655       0.000000       0.297107       0.147000   -9999.000000       0.144400       0.691000
57882     57882     hunan          113.7500       27.0797          132       175     2012      04        22        113              0.333250      19.451111       0.000000       0.284521       0.154500       0.153700       0.129000   -9999.000000
57882     57882     hunan          113.7500       27.0797          132       175     2012      04        23        114              0.346375      21.235962      12.666553       0.278417       0.159000   -9999.000000       0.168500       0.668000
57882     57882     hunan          113.7500       27.0797          132       175     2012      04        24        115              0.365125      21.348480      12.396534       0.300230   -9999.000000       0.483300   -9999.000000   -9999.000000
57882     57882     hunan          113.7500       27.0797          132       175     2012      04        25        116              0.000000      23.537170       3.253125       0.302358       0.164000   -9999.000000   -9999.000000       0.702000
57882     57882     hunan          113.7500       27.0797          132       175     2012      04        26        117              0.358542      17.257782       0.000000       0.298485       0.164000   -9999.000000   -9999.000000       0.647000
57882     57882     hunan          113.7500       27.0797          132       175     2012      04        27        118              0.317958      20.165955       1.085254       0.286169       0.161000       0.392500   -9999.000000   -9999.000000
57882     57882     hunan          113.7500       27.0797          132       175     2012      04        28        119              0.297750      20.755219       0.878906       0.282424       0.176000   -9999.000000       0.173900       0.617000
57882     57882     hunan          113.7500       27.0797          132       175     2012      04        29        120              0.327958      22.120026       9.765477       0.281817   -9999.000000   -9999.000000       0.185000   -9999.000000
57882     57882     hunan          113.7500       27.0797          132       175     2012      04        30        121              0.332250      23.020203      36.776806       0.294874   -9999.000000   -9999.000000   -9999.000000       1.000000
57882     57882     hunan          113.7500       27.0797          132       175     2012      05        01        122              0.333458      24.457245       6.584054       0.328118       0.267500   -9999.000000   -9999.000000   -9999.000000
57882     57882     hunan          113.7500       27.0797          132       175     2012      05        02        123              0.327417      21.313354       0.626801       0.311892       0.246500       0.180100   -9999.000000       0.758000
57882     57882     hunan          113.7500       27.0797          132       175     2012      05        03        124              0.324167      21.069366       3.772935       0.299408       0.259500   -9999.000000       0.120800       0.889000
57882     57882     hunan          113.7500       27.0797          132       175     2012      05        04        125              0.318542      20.789490       0.000000       0.300487   -9999.000000       0.259000       0.106000   -9999.000000
57882     57882     hunan          113.7500       27.0797          132       175     2012      05        05        126              0.310208      21.173828       0.000000       0.293551   -9999.000000   -9999.000000       0.104000       0.746000
57882     57882     hunan          113.7500       27.0797          132       175     2012      05        06        127              0.297250      23.046906       0.000000       0.288666       0.201500   -9999.000000   -9999.000000   -9999.000000
57882     57882     hunan          113.7500       27.0797          132       175     2012      05        07        128              0.279000      24.553650       2.431697       0.283943   -9999.000000       0.178100   -9999.000000       0.580000
57882     57882     hunan          113.7500       27.0797          132       175     2012      05        08        129              0.256750      25.777466       0.222222       0.279289       0.199000   -9999.000000       0.078700       0.711000
57882     57882     hunan          113.7500       27.0797          132       175     2012      05        09        130              0.296167      25.872345      17.837551       0.277682   -9999.000000       0.375300       0.089100   -9999.000000
57882     57882     hunan          113.7500       27.0797          132       175     2012      05        10        131              0.313708      24.602661       0.228444       0.311308   -9999.000000       0.327200       0.090900       0.776000
57882     57882     hunan          113.7500       27.0797          132       175     2012      05        11        132              0.303625      24.088684       1.691846       0.290177       0.219000   -9999.000000   -9999.000000   -9999.000000
57882     57882     hunan          113.7500       27.0797          132       175     2012      05        12        133              0.320458      24.874664      19.175186       0.285053       0.241500       0.322600   -9999.000000       1.000000
57882     57882     hunan          113.7500       27.0797          132       175     2012      05        13        134              0.321583      23.092255       0.920918       0.310789       0.262500   -9999.000000   -9999.000000       0.749000
57882     57882     hunan          113.7500       27.0797          132       175     2012      05        14        135              0.323542      20.969727      17.862179       0.296360       0.279000   -9999.000000       0.171100       0.907000
57882     57882     hunan          113.7500       27.0797          132       175     2012      05        15        136              0.316667      19.243622       2.923664       0.313312   -9999.000000       0.201200       0.160600       0.690000
57882     57882     hunan          113.7500       27.0797          132       175     2012      05        16        137              0.310125      19.451355       0.000000       0.296021       0.203000   -9999.000000       0.159800   -9999.000000
57882     57882     hunan          113.7500       27.0797          132       175     2012      05        17        138              0.298958      21.938538       0.000000       0.290360       0.202000       0.206200   -9999.000000       0.472000
57882     57882     hunan          113.7500       27.0797          132       175     2012      05        18        139              0.285167      23.635284       0.123281       0.284512       0.203500       0.206900   -9999.000000   -9999.000000
57882     57882     hunan          113.7500       27.0797          132       175     2012      05        19        140              0.274167      25.167603       0.861854       0.281312       0.242000   -9999.000000   -9999.000000       0.545000
57882     57882     hunan          113.7500       27.0797          132       175     2012      05        20        141              0.261583      23.340759       0.000000       0.283164   -9999.000000       0.202500       0.146300       0.619000
57882     57882     hunan          113.7500       27.0797          132       175     2012      05        21        142              0.245958      24.067230       0.265288       0.278188   -9999.000000   -9999.000000       0.105300   -9999.000000
57882     57882     hunan          113.7500       27.0797          132       175     2012      05        22        143              0.232458      24.098999       1.476230       0.276362       0.337000       0.268700       0.106900       0.521000
57882     57882     hunan          113.7500       27.0797          132       175     2012      05        23        144              0.231375      23.816376       2.385080       0.276932   -9999.000000       0.301300   -9999.000000   -9999.000000
57882     57882     hunan          113.7500       27.0797          132       175     2012      05        24        145              0.234000      22.113464       2.064611       0.284053       0.402000   -9999.000000   -9999.000000       0.785000
57882     57882     hunan          113.7500       27.0797          132       175     2012      05        25        146              0.000000      21.240295       1.124393       0.282653   -9999.000000       0.163400       0.109900       0.699000
57882     57882     hunan          113.7500       27.0797          132       175     2012      05        26        147              0.231292      20.722260       1.784821       0.281912   -9999.000000   -9999.000000       0.117700   -9999.000000
57882     57882     hunan          113.7500       27.0797          132       175     2012      05        27        148              0.230375      20.818390       1.034079       0.282281       0.315500       0.196800       0.116200       0.710000
57882     57882     hunan          113.7500       27.0797          132       175     2012      05        28        149              0.233250      22.390381       0.000000       0.280042       0.280000       0.477600   -9999.000000   -9999.000000
57882     57882     hunan          113.7500       27.0797          132       175     2012      05        29        150              0.270125      23.294495      23.153399       0.275672       0.324500   -9999.000000   -9999.000000       0.964000
57882     57882     hunan          113.7500       27.0797          132       175     2012      05        30        151              0.318875      24.250122       0.245002       0.307909   -9999.000000       0.144200   -9999.000000   -9999.000000
57882     57882     hunan          113.7500       27.0797          132       175     2012      05        31        152              0.314583      21.913879       9.278756       0.295423   -9999.000000   -9999.000000   -9999.000000   -9999.000000
57882     57882     hunan          113.7500       27.0797          132       175     2012      06        01        153              0.332125      23.231842       6.418064       0.292216       0.411000   -9999.000000       0.120200       1.000000
57882     57882     hunan          113.7500       27.0797          132       175     2012      06        02        154              0.317625      21.022125       0.683721       0.302618       0.384500       0.369800       0.115400   -9999.000000
57882     57882     hunan          113.7500       27.0797          132       175     2012      06        03        155              0.310250      21.681671       3.794572       0.287601       0.397500   -9999.000000   -9999.000000       0.889000
57882     57882     hunan          113.7500       27.0797          132       175     2012      06        04        156              0.311417      22.569336       4.401884       0.288599       0.490000       0.456600   -9999.000000   -9999.000000
57882     57882     hunan          113.7500       27.0797          132       175     2012      06        05        157              0.318708      21.814514       1.819076       0.293669   -9999.000000   -9999.000000       0.084500       0.702000
57882     57882     hunan          113.7500       27.0797          132       175     2012      06        06        158              0.331750      22.886505       2.772108       0.288413       0.377000   -9999.000000       0.076900       0.982000
57882     57882     hunan          113.7500       27.0797          132       175     2012      06        07        159              0.332125      24.626984       9.319689       0.288018       0.377000       0.268300       0.077500   -9999.000000
57882     57882     hunan          113.7500       27.0797          132       175     2012      06        08        160              0.330125      26.175232       5.004703       0.301266       0.350000   -9999.000000       0.071700       0.811000
57882     57882     hunan          113.7500       27.0797          132       175     2012      06        09        161              0.321417      27.108215       1.458191       0.295662       0.339000       0.242600   -9999.000000   -9999.000000
57882     57882     hunan          113.7500       27.0797          132       175     2012      06        10        162              0.330458      27.582397      34.382381       0.286124   -9999.000000       0.283300   -9999.000000       1.000000
57882     57882     hunan          113.7500       27.0797          132       175     2012      06        11        163              0.000000      27.078064       4.659319       0.321125   -9999.000000   -9999.000000       0.102800       1.000000
57882     57882     hunan          113.7500       27.0797          132       175     2012      06        12        164              0.345333      24.748230       3.444132       0.307850       0.258000       0.180400       0.102400       0.683000
57882     57882     hunan          113.7500       27.0797          132       175     2012      06        13        165              0.325042      26.859406       0.000000       0.292566       0.247000   -9999.000000       0.097100       0.617000
57882     57882     hunan          113.7500       27.0797          132       175     2012      06        14        166              0.313500      27.717590       1.102874       0.286482       0.252500       0.221300   -9999.000000   -9999.000000
57882     57882     hunan          113.7500       27.0797          132       175     2012      06        15        167              0.308042      26.904205       0.320128       0.285332   -9999.000000       0.292700   -9999.000000       0.468000
57882     57882     hunan          113.7500       27.0797          132       175     2012      06        16        168              0.300542      26.032196       1.103995       0.282663   -9999.000000   -9999.000000   -9999.000000   -9999.000000
57882     57882     hunan          113.7500       27.0797          132       175     2012      06        17        169              0.319292      26.923889      14.941596       0.279282       0.253000       0.247200       0.099000       0.834000
57882     57882     hunan          113.7500       27.0797          132       175     2012      06        18        170              0.314583      25.645081       1.063984       0.304742       0.230000       0.244800       0.080200       0.763000
57882     57882     hunan          113.7500       27.0797          132       175     2012      06        19        171              0.307042      26.819336       1.115760       0.288673       0.233000   -9999.000000       0.075800   -9999.000000
57882     57882     hunan          113.7500       27.0797          132       175     2012      06        20        172              0.298542      27.140594       0.000000       0.284050       0.218000       0.226200   -9999.000000       0.435000
57882     57882     hunan          113.7500       27.0797          132       175     2012      06        21        173              0.288583      27.780396       3.584198       0.277960   -9999.000000   -9999.000000   -9999.000000   -9999.000000
57882     57882     hunan          113.7500       27.0797          132       175     2012      06        22        174              0.330292      27.843262       8.063683       0.278596       0.290000   -9999.000000       0.078900       0.539000
57882     57882     hunan          113.7500       27.0797          132       175     2012      06        23        175              0.332875      25.090393       9.007584       0.298080       0.299000       0.158600       0.087000       0.890000
57882     57882     hunan          113.7500       27.0797          132       175     2012      06        24        176              0.327500      24.132538      35.739170       0.301171       0.303500   -9999.000000       0.085900   -9999.000000
57882     57882     hunan          113.7500       27.0797          132       175     2012      06        25        177              0.320500      26.497620       1.009841       0.321816       0.299000       0.398400       0.103100       0.580000
57882     57882     hunan          113.7500       27.0797          132       175     2012      06        26        178              0.311167      27.294647       5.272933       0.300315   -9999.000000   -9999.000000   -9999.000000   -9999.000000
57882     57882     hunan          113.7500       27.0797          132       175     2012      06        27        179              0.301917      27.063934       0.478054       0.299942       0.281000   -9999.000000   -9999.000000       0.703000
57882     57882     hunan          113.7500       27.0797          132       175     2012      06        28        180              0.287625      27.902130       0.744786       0.290778       0.273500       0.304300       0.097600   -9999.000000
57882     57882     hunan          113.7500       27.0797          132       175     2012      06        29        181              0.269292      29.016449       0.000000       0.283931       0.245500   -9999.000000       0.100100   -9999.000000
57882     57882     hunan          113.7500       27.0797          132       175     2012      06        30        182              0.248667      29.650879       0.000000       0.280284       0.247500       0.340300       0.096100   -9999.000000
57882     57882     hunan          113.7500       27.0797          132       175     2012      07        01        183              0.230042      29.047333       0.000000       0.277446   -9999.000000   -9999.000000   -9999.000000   -9999.000000
57882     57882     hunan          113.7500       27.0797          132       175     2012      07        02        184              0.215500      28.410431       0.000000       0.274702   -9999.000000       0.243300   -9999.000000       0.616000
57882     57882     hunan          113.7500       27.0797          132       175     2012      07        03        185              0.203875      28.333496       0.000000       0.271360       0.312500       0.459500   -9999.000000   -9999.000000
57882     57882     hunan          113.7500       27.0797          132       175     2012      07        04        186              0.195917      28.575195       0.000000       0.268834       0.284000   -9999.000000       0.134800       0.388000
57882     57882     hunan          113.7500       27.0797          132       175     2012      07        05        187              0.189083      29.284607       0.250102       0.266148       0.297000       0.096400       0.140900       0.624000
57882     57882     hunan          113.7500       27.0797          132       175     2012      07        06        188              0.183458      29.454163       0.216298       0.264682   -9999.000000   -9999.000000       0.131800   -9999.000000
57882     57882     hunan          113.7500       27.0797          132       175     2012      07        07        189              0.179292      29.590088       0.000000       0.261967   -9999.000000   -9999.000000   -9999.000000       0.263000
57882     57882     hunan          113.7500       27.0797          132       175     2012      07        08        190              0.175208      29.278015       0.000000       0.258145       0.287000       0.267700   -9999.000000   -9999.000000
57882     57882     hunan          113.7500       27.0797          132       175     2012      07        09        191              0.171958      29.493500       0.000000       0.254041       0.285500   -9999.000000       0.119900       0.305000
57882     57882     hunan          113.7500       27.0797          132       175     2012      07        10        192              0.169167      29.362366       0.000000       0.249909       0.290000   -9999.000000       0.113400       0.511000
57882     57882     hunan          113.7500       27.0797          132       175     2012      07        11        193              0.167333      29.458160       0.264405       0.245974       0.262000       0.339800       0.112200       0.296000
57882     57882     hunan          113.7500       27.0797          132       175     2012      07        12        194              0.165417      29.841888       1.120398       0.243354   -9999.000000   -9999.000000   -9999.000000       0.395000
57882     57882     hunan          113.7500       27.0797          132       175     2012      07        13        195              0.163667      29.453949       0.000000       0.244640       0.284000       0.224700   -9999.000000   -9999.000000
57882     57882     hunan          113.7500       27.0797          132       175     2012      07        14        196              0.162125      29.528839      53.477512       0.236563       0.332000   -9999.000000   -9999.000000       0.814000
57882     57882     hunan          113.7500       27.0797          132       175     2012      07        15        197              0.317458      27.550049      25.449001       0.308067       0.352000   -9999.000000       0.099800   -9999.000000
57882     57882     hunan          113.7500       27.0797          132       175     2012      07        16        198              0.332000      26.695557      27.388117       0.325715       0.368000       0.277100       0.126800       0.922000
57882     57882     hunan          113.7500       27.0797          132       175     2012      07        17        199              0.320833      26.384521      12.958464       0.324207   -9999.000000   -9999.000000       0.126600       1.000000
57882     57882     hunan          113.7500       27.0797          132       175     2012      07        18        200              0.331333      26.832336      76.952988       0.314985   -9999.000000       0.339400   -9999.000000   -9999.000000
57882     57882     hunan          113.7500       27.0797          132       175     2012      07        19        201              0.318042      27.599304       1.535451       0.410697       0.329500   -9999.000000   -9999.000000       0.476000
57882     57882     hunan          113.7500       27.0797          132       175     2012      07        20        202              0.304625      27.916107       0.520097       0.380537       0.299000       0.205500   -9999.000000   -9999.000000
57882     57882     hunan          113.7500       27.0797          132       175     2012      07        21        203              0.288739      28.427643       0.953462       0.322533       0.305000       0.350300       0.122400       0.492000
57882     57882     hunan          113.7500       27.0797          132       175     2012      07        22        204              0.272208      29.443268       0.505065       0.306757       0.303000   -9999.000000       0.119500       0.534000
57882     57882     hunan          113.7500       27.0797          132       175     2012      07        23        205              0.258625      29.784943       3.992353       0.298787   -9999.000000       0.289900       0.150600   -9999.000000
57882     57882     hunan          113.7500       27.0797          132       175     2012      07        24        206              0.252333      28.604095       0.102578       0.297604       0.305000       0.307500   -9999.000000       0.560000
57882     57882     hunan          113.7500       27.0797          132       175     2012      07        25        207              0.238958      27.151245       1.690422       0.290169       0.316500   -9999.000000   -9999.000000   -9999.000000
57882     57882     hunan          113.7500       27.0797          132       175     2012      07        26        208              0.222000      28.232269       2.678739       0.285988       0.293500       0.251300       0.159300       0.560000
57882     57882     hunan          113.7500       27.0797          132       175     2012      07        27        209              0.208583      28.452118       0.945572       0.287703       0.278000   -9999.000000       0.164400   -9999.000000
57882     57882     hunan          113.7500       27.0797          132       175     2012      07        28        210              0.197833      28.423340       0.366104       0.284429   -9999.000000   -9999.000000       0.172500       0.432000
57882     57882     hunan          113.7500       27.0797          132       175     2012      07        29        211              0.190417      28.798187       0.399348       0.280027   -9999.000000       0.142300   -9999.000000       0.684000
57882     57882     hunan          113.7500       27.0797          132       175     2012      07        30        212              0.186333      29.126648       1.016346       0.276924       0.279000   -9999.000000   -9999.000000   -9999.000000
57882     57882     hunan          113.7500       27.0797          132       175     2012      07        31        213              0.180917      28.975250       0.845328       0.276737       0.235000       0.277000   -9999.000000       0.463000
57882     57882     hunan          113.7500       27.0797          132       175     2012      08        01        214              0.175375      29.404297       0.189793       0.272336       0.278500   -9999.000000       0.196700   -9999.000000
57882     57882     hunan          113.7500       27.0797          132       175     2012      08        02        215              0.171917      29.333588       0.000000       0.267447   -9999.000000       0.398500       0.208300       0.355000
57882     57882     hunan          113.7500       27.0797          132       175     2012      08        03        216              0.168667      28.901550       1.823070       0.263818   -9999.000000       0.223800       0.195800       0.572000
57882     57882     hunan          113.7500       27.0797          132       175     2012      08        04        217              0.263500      28.400940      38.411987       0.263312       0.351000   -9999.000000   -9999.000000   -9999.000000
57882     57882     hunan          113.7500       27.0797          132       175     2012      08        05        218              0.307000      25.479950       0.000000       0.326004       0.314500       0.231300   -9999.000000       0.497000
57882     57882     hunan          113.7500       27.0797          132       175     2012      08        06        219              0.294875      26.000183       3.798418       0.292963       0.300000   -9999.000000       0.146100   -9999.000000
57882     57882     hunan          113.7500       27.0797          132       175     2012      08        07        220              0.308000      27.183929      10.111046       0.289803   -9999.000000       0.341800       0.131100       0.520000
57882     57882     hunan          113.7500       27.0797          132       175     2012      08        08        221              0.301250      27.923187       0.000000       0.297046   -9999.000000       0.212400       0.136100       0.676000
57882     57882     hunan          113.7500       27.0797          132       175     2012      08        09        222              0.306458      28.169281       1.612721       0.281698       0.269000   -9999.000000       0.138500       0.533000
57882     57882     hunan          113.7500       27.0797          132       175     2012      08        10        223              0.309083      27.595123       6.675043       0.279777       0.301000       0.110000   -9999.000000       0.944000
57882     57882     hunan          113.7500       27.0797          132       175     2012      08        11        224              0.306250      27.415588       1.408737       0.288338       0.274500       0.098200   -9999.000000   -9999.000000
57882     57882     hunan          113.7500       27.0797          132       175     2012      08        12        225              0.319917      27.636200       1.074777       0.284651       0.273500   -9999.000000       0.131200       0.467000
57882     57882     hunan          113.7500       27.0797          132       175     2012      08        13        226              0.303500      28.215302       0.325823       0.278697   -9999.000000       0.246500       0.142700   -9999.000000
57882     57882     hunan          113.7500       27.0797          132       175     2012      08        14        227              0.289708      28.561981       0.231028       0.274396   -9999.000000   -9999.000000       0.136600       0.397000
57882     57882     hunan          113.7500       27.0797          132       175     2012      08        15        228              0.274292      29.047150       0.000000       0.269752       0.253500   -9999.000000   -9999.000000       0.478000
57882     57882     hunan          113.7500       27.0797          132       175     2012      08        16        229              0.258250      29.666138       1.667408       0.265734       0.225500       0.151200   -9999.000000   -9999.000000
57882     57882     hunan          113.7500       27.0797          132       175     2012      08        17        230              0.240417      29.740845       0.000000       0.267767       0.245500   -9999.000000   -9999.000000       0.370000
57882     57882     hunan          113.7500       27.0797          132       175     2012      08        18        231              0.221500      30.015076       1.782821       0.261167       0.242000       0.330400       0.129900   -9999.000000
57882     57882     hunan          113.7500       27.0797          132       175     2012      08        19        232              0.207625      29.190216       2.776636       0.263915   -9999.000000   -9999.000000       0.136200       0.368000
57882     57882     hunan          113.7500       27.0797          132       175     2012      08        20        233              0.200208      29.236664       9.558508       0.268733       0.264000   -9999.000000       0.087400       0.413000
57882     57882     hunan          113.7500       27.0797          132       175     2012      08        21        234              0.198542      29.114716      15.344187       0.284143       0.284500       0.146900   -9999.000000   -9999.000000
57882     57882     hunan          113.7500       27.0797          132       175     2012      08        22        235              0.237167      27.909943      24.197721       0.300934       0.355000   -9999.000000   -9999.000000   -9999.000000
57882     57882     hunan          113.7500       27.0797          132       175     2012      08        23        236              0.270167      24.840942       0.439905       0.319986       0.362000       0.262200       0.113100   -9999.000000
57882     57882     hunan          113.7500       27.0797          132       175     2012      08        24        237              0.263667      23.873505       1.781934       0.294468   -9999.000000   -9999.000000       0.109400       0.554000
57882     57882     hunan          113.7500       27.0797          132       175     2012      08        25        238              0.000000      24.739105      30.893837       0.283914   -9999.000000       0.152400       0.105800   -9999.000000
57882     57882     hunan          113.7500       27.0797          132       175     2012      08        26        239              0.248333      26.125732       3.446314       0.278307       0.280500       0.233300       0.096800       0.520000
57882     57882     hunan          113.7500       27.0797          132       175     2012      08        27        240              0.234458      26.910522       0.815161       0.281963       0.260000   -9999.000000   -9999.000000       0.627000
57882     57882     hunan          113.7500       27.0797          132       175     2012      08        28        241              0.218875      26.645630       0.000000       0.274825       0.264500       0.209200   -9999.000000   -9999.000000
57882     57882     hunan          113.7500       27.0797          132       175     2012      08        29        242              0.204833      26.802979       0.000000       0.270125   -9999.000000   -9999.000000       0.136500       0.459000
57882     57882     hunan          113.7500       27.0797          132       175     2012      08        30        243              0.194250      27.636139       0.000000       0.266209   -9999.000000   -9999.000000       0.138700   -9999.000000
57882     57882     hunan          113.7500       27.0797          132       175     2012      08        31        244              0.186083      28.195496       2.753016       0.263833       0.267000       0.178000       0.135900       0.328000
57882     57882     hunan          113.7500       27.0797          132       175     2012      09        01        245              0.180000      28.477234       0.312728       0.270046       0.245500   -9999.000000   -9999.000000       0.716000
57882     57882     hunan          113.7500       27.0797          132       175     2012      09        02        246              0.187167      28.881531      16.517832       0.264582       0.276000   -9999.000000   -9999.000000   -9999.000000
57882     57882     hunan          113.7500       27.0797          132       175     2012      09        03        247              0.256625      28.266174       2.051937       0.287888       0.348000       0.222800   -9999.000000       0.671000
57882     57882     hunan          113.7500       27.0797          132       175     2012      09        04        248              0.249708      24.006073       0.233090       0.289721   -9999.000000   -9999.000000       0.153500   -9999.000000
57882     57882     hunan          113.7500       27.0797          132       175     2012      09        05        249              0.237292      24.777893       0.000000       0.277423   -9999.000000       0.275800       0.159000       0.324000
57882     57882     hunan          113.7500       27.0797          132       175     2012      09        06        250              0.220708      25.492828       0.000000       0.269072       0.262000   -9999.000000       0.150000       0.656000
57882     57882     hunan          113.7500       27.0797          132       175     2012      09        07        251              0.270667      27.154480       3.666348       0.264081       0.262000   -9999.000000   -9999.000000       0.457000
57882     57882     hunan          113.7500       27.0797          132       175     2012      09        08        252              0.280083      27.417572       0.000000       0.271099       0.267000       0.219600   -9999.000000       0.394000
57882     57882     hunan          113.7500       27.0797          132       175     2012      09        09        253              0.262625      27.711456       0.000000       0.262214   -9999.000000   -9999.000000       0.161500   -9999.000000
57882     57882     hunan          113.7500       27.0797          132       175     2012      09        10        254              0.249208      27.449524       0.160213       0.258473   -9999.000000       0.119600       0.170800       0.325000
57882     57882     hunan          113.7500       27.0797          132       175     2012      09        11        255              0.235417      27.198883       5.159468       0.257717       0.206500   -9999.000000       0.174800   -9999.000000
57882     57882     hunan          113.7500       27.0797          132       175     2012      09        12        256              0.225542      28.076813       1.083678       0.267089       0.206500       0.124000   -9999.000000       0.406000
57882     57882     hunan          113.7500       27.0797          132       175     2012      09        13        257              0.219208      26.335510       0.319702       0.265098       0.238000       0.187700   -9999.000000       0.495000
57882     57882     hunan          113.7500       27.0797          132       175     2012      09        14        258              0.212875      21.492584       0.000000       0.262118       0.211000   -9999.000000   -9999.000000   -9999.000000
57882     57882     hunan          113.7500       27.0797          132       175     2012      09        15        259              0.203708      21.025665       0.000000       0.259379   -9999.000000       0.167800       0.160600       0.091000
57882     57882     hunan          113.7500       27.0797          132       175     2012      09        16        260              0.194292      22.129974       0.000000       0.255350       0.204000   -9999.000000       0.173400   -9999.000000
57882     57882     hunan          113.7500       27.0797          132       175     2012      09        17        261              0.186292      22.503204       0.000000       0.252478       0.209500   -9999.000000       0.117300       0.172000
57882     57882     hunan          113.7500       27.0797          132       175     2012      09        18        262              0.182125      21.847809       0.000000       0.252509       0.194000       0.257200   -9999.000000       0.313000
57882     57882     hunan          113.7500       27.0797          132       175     2012      09        19        263              0.177458      22.951385       1.686913       0.250540       0.201500   -9999.000000   -9999.000000   -9999.000000
57882     57882     hunan          113.7500       27.0797          132       175     2012      09        20        264              0.179417      23.783264      28.215528       0.248735   -9999.000000   -9999.000000   -9999.000000       0.509000
57882     57882     hunan          113.7500       27.0797          132       175     2012      09        21        265              0.253333      23.397125       7.806511       0.275880   -9999.000000   -9999.000000       0.139200   -9999.000000
57882     57882     hunan          113.7500       27.0797          132       175     2012      09        22        266              0.274583      22.879486       9.767774       0.307144       0.297000   -9999.000000       0.131200       0.789000
57882     57882     hunan          113.7500       27.0797          132       175     2012      09        23        267              0.306292      22.144104      49.340401       0.305215       0.258000       0.259500       0.112200   -9999.000000
57882     57882     hunan          113.7500       27.0797          132       175     2012      09        24        268              0.309542      21.979156       6.952374       0.339046       0.292000   -9999.000000   -9999.000000       0.746000
57882     57882     hunan          113.7500       27.0797          132       175     2012      09        25        269              0.301500      22.237732       0.000000       0.309230   -9999.000000   -9999.000000   -9999.000000       0.732000
57882     57882     hunan          113.7500       27.0797          132       175     2012      09        26        270              0.293125      23.212036       0.000000       0.291929   -9999.000000       0.281700       0.194700   -9999.000000
57882     57882     hunan          113.7500       27.0797          132       175     2012      09        27        271              0.286500      23.420502       0.000000       0.287002       0.228000   -9999.000000       0.201200       0.417000
57882     57882     hunan          113.7500       27.0797          132       175     2012      09        28        272              0.271200      23.964325       0.000000       0.282909       0.234500   -9999.000000       0.197700   -9999.000000
57882     57882     hunan          113.7500       27.0797          132       175     2012      09        29        273              0.261667      22.551422       0.000000       0.279670       0.227000   -9999.000000   -9999.000000       0.203000
57882     57882     hunan          113.7500       27.0797          132       175     2012      09        30        274              0.249417      21.572876       0.000000       0.277832       0.216000   -9999.000000   -9999.000000       0.680000
57882     57882     hunan          113.7500       27.0797          132       175     2012      10        01        275              0.236917      21.166901       0.000000       0.276525   -9999.000000   -9999.000000   -9999.000000   -9999.000000
57882     57882     hunan          113.7500       27.0797          132       175     2012      10        02        276              0.224958      21.113281       0.000000       0.274776   -9999.000000   -9999.000000       0.157700       0.415000
57882     57882     hunan          113.7500       27.0797          132       175     2012      10        03        277              0.214625      21.494354       0.000000       0.273425       0.191500       0.229600       0.168900   -9999.000000
57882     57882     hunan          113.7500       27.0797          132       175     2012      10        04        278              0.207583      20.598969       0.000000       0.273584       0.198500   -9999.000000       0.162100       0.335000
57882     57882     hunan          113.7500       27.0797          132       175     2012      10        05        279              0.202458      20.777985       0.000000       0.273499       0.205000   -9999.000000   -9999.000000       0.614000
57882     57882     hunan          113.7500       27.0797          132       175     2012      10        06        280              0.198208      20.682770       0.000000       0.272584   -9999.000000       0.220400   -9999.000000       0.287000
57882     57882     hunan          113.7500       27.0797          132       175     2012      10        07        281              0.195750      19.836029       0.000000       0.272706   -9999.000000   -9999.000000   -9999.000000       0.357000
57882     57882     hunan          113.7500       27.0797          132       175     2012      10        08        282              0.191542      21.220673       0.000000       0.270940       0.189000       0.318200       0.142600   -9999.000000
57882     57882     hunan          113.7500       27.0797          132       175     2012      10        09        283              0.188417      21.725220       0.000000       0.269095       0.187500       0.206700       0.144300       0.186000
57882     57882     hunan          113.7500       27.0797          132       175     2012      10        10        284              0.187583      20.204010       0.000000       0.269451       0.196000   -9999.000000       0.142200   -9999.000000
57882     57882     hunan          113.7500       27.0797          132       175     2012      10        11        285              0.184167      21.133057       0.000000       0.266401       0.163000       0.190600   -9999.000000       0.250000
57882     57882     hunan          113.7500       27.0797          132       175     2012      10        12        286              0.181208      20.798340       0.000000       0.263667   -9999.000000   -9999.000000   -9999.000000       0.514000
57882     57882     hunan          113.7500       27.0797          132       175     2012      10        13        287              0.178583      21.161804       0.000000       0.261769       0.172000   -9999.000000       0.140500   -9999.000000
57882     57882     hunan          113.7500       27.0797          132       175     2012      10        14        288              0.175958      21.849762       0.107574       0.260205       0.186500       0.219700       0.145200       0.310000
57882     57882     hunan          113.7500       27.0797          132       175     2012      10        15        289              0.175083      20.820465       0.198631       0.260724       0.180500   -9999.000000       0.168900   -9999.000000
57882     57882     hunan          113.7500       27.0797          132       175     2012      10        16        290              0.184208      22.473480       6.530570       0.259336       0.187000       0.129000   -9999.000000       0.684000
57882     57882     hunan          113.7500       27.0797          132       175     2012      10        17        291              0.217042      22.047394       0.000000       0.272015   -9999.000000   -9999.000000   -9999.000000       0.413000
57882     57882     hunan          113.7500       27.0797          132       175     2012      10        18        292              0.213250      19.612671       0.000000       0.268580   -9999.000000       0.355800   -9999.000000   -9999.000000
57882     57882     hunan          113.7500       27.0797          132       175     2012      10        19        293              0.208125      19.660553       0.000000       0.262949       0.177500   -9999.000000       0.161100       0.387000
57882     57882     hunan          113.7500       27.0797          132       175     2012      10        20        294              0.201292      21.222900       0.000000       0.260635       0.155000   -9999.000000       0.169600   -9999.000000
57882     57882     hunan          113.7500       27.0797          132       175     2012      10        21        295              0.194250      23.062744       0.000000       0.258276       0.169000       0.299700       0.167400       0.468000
57882     57882     hunan          113.7500       27.0797          132       175     2012      10        22        296              0.188042      23.748962       1.043621       0.256712   -9999.000000   -9999.000000   -9999.000000   -9999.000000
57882     57882     hunan          113.7500       27.0797          132       175     2012      10        23        297              0.196208      19.529480       0.166893       0.260176   -9999.000000       0.085400   -9999.000000       0.178000
57882     57882     hunan          113.7500       27.0797          132       175     2012      10        24        298              0.196542      18.568451       0.415978       0.260496   -9999.000000       0.288700       0.142300       0.586000
57882     57882     hunan          113.7500       27.0797          132       175     2012      10        25        299              0.000000      19.983826       0.000000       0.258818       0.175500   -9999.000000       0.138300   -9999.000000
57882     57882     hunan          113.7500       27.0797          132       175     2012      10        26        300              0.187000      21.168091       0.000000       0.257693       0.175500   -9999.000000       0.142900       0.373000
57882     57882     hunan          113.7500       27.0797          132       175     2012      10        27        301              0.181792      22.182465       0.556970       0.255151       0.184000       0.102800       0.138200   -9999.000000
57882     57882     hunan          113.7500       27.0797          132       175     2012      10        28        302              0.000000      20.367950       6.607422       0.257977   -9999.000000   -9999.000000   -9999.000000       0.558000
57882     57882     hunan          113.7500       27.0797          132       175     2012      10        29        303              0.235875      19.695343      16.451921       0.278603   -9999.000000       0.201000   -9999.000000       0.721000
57882     57882     hunan          113.7500       27.0797          132       175     2012      10        30        304              0.302333      19.765564       1.259260       0.298869       0.218500   -9999.000000       0.169700   -9999.000000
57882     57882     hunan          113.7500       27.0797          132       175     2012      10        31        305              0.289000      17.638306       0.000000       0.291621       0.188000   -9999.000000       0.181300       0.290000
57882     57882     hunan          113.7500       27.0797          132       175     2012      11        01        306              0.277792      17.071808       0.000000       0.277610       0.193000       0.221100       0.180300   -9999.000000
57882     57882     hunan          113.7500       27.0797          132       175     2012      11        02        307              0.269833      16.229675       0.000000       0.272577   -9999.000000   -9999.000000   -9999.000000       0.290000
57882     57882     hunan          113.7500       27.0797          132       175     2012      11        03        308              0.265875      17.210541       0.491506       0.268596   -9999.000000   -9999.000000   -9999.000000       0.535000
57882     57882     hunan          113.7500       27.0797          132       175     2012      11        04        309              0.263208      16.491791       0.000000       0.268322       0.183000   -9999.000000   -9999.000000       0.278000
57882     57882     hunan          113.7500       27.0797          132       175     2012      11        05        310              0.257792      16.649506       0.625328       0.265420       0.183000   -9999.000000       0.115100       0.348000
57882     57882     hunan          113.7500       27.0797          132       175     2012      11        06        311              0.253708      16.696991       1.703117       0.264696       0.203500   -9999.000000       0.106900   -9999.000000
57882     57882     hunan          113.7500       27.0797          132       175     2012      11        07        312              0.306750      16.170868      21.657940       0.265888   -9999.000000   -9999.000000       0.116900       0.715000
57882     57882     hunan          113.7500       27.0797          132       175     2012      11        08        313              0.343143      14.184021      37.711472       0.309082   -9999.000000       0.106500   -9999.000000   -9999.000000
57882     57882     hunan          113.7500       27.0797          132       175     2012      11        09        314              0.330500      13.460297      31.910957       0.335192   -9999.000000   -9999.000000   -9999.000000       0.844000
57882     57882     hunan          113.7500       27.0797          132       175     2012      11        10        315              0.333583      13.621857       7.799968       0.328764       0.272000       0.269300       0.134100       1.000000
57882     57882     hunan          113.7500       27.0797          132       175     2012      11        11        316              0.309125      12.959137       0.898974       0.314162       0.192000       0.302900       0.127600   -9999.000000
57882     57882     hunan          113.7500       27.0797          132       175     2012      11        12        317              0.300042      14.003174       0.281426       0.297781       0.197000   -9999.000000       0.187100       0.394000
57882     57882     hunan          113.7500       27.0797          132       175     2012      11        13        318              0.000000      13.712646       0.000000       0.293175   -9999.000000   -9999.000000   -9999.000000   -9999.000000
57882     57882     hunan          113.7500       27.0797          132       175     2012      11        14        319              0.291167      14.958344       9.853168       0.289888   -9999.000000       0.132700   -9999.000000       0.727000
57882     57882     hunan          113.7500       27.0797          132       175     2012      11        15        320              0.294042      14.494293       8.274961       0.300145       0.223000   -9999.000000   -9999.000000       0.768000
57882     57882     hunan          113.7500       27.0797          132       175     2012      11        16        321              0.311208      14.444702      15.291985       0.307978   -9999.000000       0.224200       0.188800   -9999.000000
57882     57882     hunan          113.7500       27.0797          132       175     2012      11        17        322              0.000000      11.036499       0.000000       0.315030       0.223000   -9999.000000       0.176800       0.333000
57882     57882     hunan          113.7500       27.0797          132       175     2012      11        18        323              0.297208      11.635162       0.000000       0.299281       0.222000   -9999.000000       0.184400   -9999.000000
57882     57882     hunan          113.7500       27.0797          132       175     2012      11        19        324              0.293583      11.892120       0.000000       0.294955   -9999.000000       0.188400   -9999.000000       0.549000
57882     57882     hunan          113.7500       27.0797          132       175     2012      11        20        325              0.290875      13.701965       7.822255       0.292071       0.202000   -9999.000000   -9999.000000   -9999.000000
57882     57882     hunan          113.7500       27.0797          132       175     2012      11        21        326              0.316542      14.311066      16.701645       0.296028       0.191500       0.239700   -9999.000000       0.743000
57882     57882     hunan          113.7500       27.0797          132       175     2012      11        22        327              0.305208      13.031219       9.822131       0.318993       0.208500   -9999.000000       0.135900       0.803000
57882     57882     hunan          113.7500       27.0797          132       175     2012      11        23        328              0.300542      12.132294       0.662036       0.311796       0.202000       0.385200       0.137400   -9999.000000
57882     57882     hunan          113.7500       27.0797          132       175     2012      11        24        329              0.298375      11.429657       0.461390       0.302952   -9999.000000       0.313000       0.134500       0.529000
57882     57882     hunan          113.7500       27.0797          132       175     2012      11        25        330              0.316167      11.641785      20.802462       0.298823   -9999.000000   -9999.000000   -9999.000000   -9999.000000
57882     57882     hunan          113.7500       27.0797          132       175     2012      11        26        331              0.306833      11.298218       0.000000       0.319714       0.173000       0.059800   -9999.000000       0.399000
57882     57882     hunan          113.7500       27.0797          132       175     2012      11        27        332              0.300042      10.713135       4.133696       0.304318       0.179500   -9999.000000       0.094000       0.555000
57882     57882     hunan          113.7500       27.0797          132       175     2012      11        28        333              0.298208      10.776947       0.894919       0.303517       0.199000       0.273700       0.087100   -9999.000000
57882     57882     hunan          113.7500       27.0797          132       175     2012      11        29        334              0.307875      10.391449       5.609701       0.302412   -9999.000000       0.274800       0.095000       0.493000
57882     57882     hunan          113.7500       27.0797          132       175     2012      11        30        335              0.317208      11.090424      11.200960       0.303062   -9999.000000   -9999.000000   -9999.000000   -9999.000000
57882     57882     hunan          113.7500       27.0797          132       175     2012      12        01        336              0.314042      10.527252       2.928373       0.309256       0.224000       0.474700   -9999.000000       0.663000
57882     57882     hunan          113.7500       27.0797          132       175     2012      12        02        337              0.301667      10.075256       0.000000       0.307156       0.248000       0.349500   -9999.000000       0.416000
57882     57882     hunan          113.7500       27.0797          132       175     2012      12        03        338              0.296500       8.842255      11.566979       0.299041       0.215000   -9999.000000       0.117200       0.334000
57882     57882     hunan          113.7500       27.0797          132       175     2012      12        04        339              0.292917       9.813599       0.524196       0.295716       0.232000       0.267400       0.123800       0.366000
57882     57882     hunan          113.7500       27.0797          132       175     2012      12        05        340              0.289000       9.440704       0.000000       0.293643   -9999.000000   -9999.000000       0.121100   -9999.000000
57882     57882     hunan          113.7500       27.0797          132       175     2012      12        06        341              0.285333      10.495972       0.000000       0.290273       0.198000   -9999.000000   -9999.000000       0.395000
57882     57882     hunan          113.7500       27.0797          132       175     2012      12        07        342              0.282417      10.752228       0.000000       0.288111       0.198500       0.209200   -9999.000000   -9999.000000
57882     57882     hunan          113.7500       27.0797          132       175     2012      12        08        343              0.278792      12.029907       1.396906       0.286997       0.197500   -9999.000000       0.119600       0.242000
57882     57882     hunan          113.7500       27.0797          132       175     2012      12        09        344              0.275417      11.627991       5.692656       0.287163       0.214500   -9999.000000       0.125800       0.333000
57882     57882     hunan          113.7500       27.0797          132       175     2012      12        10        345              0.305792       9.906586      12.637838       0.293729   -9999.000000   -9999.000000       0.072400   -9999.000000
57882     57882     hunan          113.7500       27.0797          132       175     2012      12        11        346              0.303292       7.626709       0.000000       0.311904   -9999.000000   -9999.000000       0.074500       0.313000
57882     57882     hunan          113.7500       27.0797          132       175     2012      12        12        347              0.297083       7.564240       1.958916       0.293967       0.183000       0.059400   -9999.000000   -9999.000000
57882     57882     hunan          113.7500       27.0797          132       175     2012      12        13        348              0.295125       7.498840       0.825480       0.293255       0.203000   -9999.000000   -9999.000000       0.567000
57882     57882     hunan          113.7500       27.0797          132       175     2012      12        14        349              0.293500      11.150970       0.000000       0.290217       0.210500       0.183300       0.070700       0.568000
57882     57882     hunan          113.7500       27.0797          132       175     2012      12        15        350              0.000000      13.335236       2.981524       0.288362       0.242000   -9999.000000       0.072500   -9999.000000
57882     57882     hunan          113.7500       27.0797          132       175     2012      12        16        351              0.284542       9.327087       2.058856       0.291745   -9999.000000       0.184800       0.079500       0.315000
57882     57882     hunan          113.7500       27.0797          132       175     2012      12        17        352              0.313583       8.717224      20.085859       0.292009       0.204000       0.242000   -9999.000000   -9999.000000
57882     57882     hunan          113.7500       27.0797          132       175     2012      12        18        353              0.306875       7.890137       0.389142       0.317662   -9999.000000   -9999.000000   -9999.000000       0.546000
57882     57882     hunan          113.7500       27.0797          132       175     2012      12        19        354              0.300542       6.333893       4.674993       0.300484       0.216000       0.243500   -9999.000000   -9999.000000
57882     57882     hunan          113.7500       27.0797          132       175     2012      12        20        355              0.000000       6.892853       5.989720       0.298415       0.253000   -9999.000000       0.072000       0.691000
57882     57882     hunan          113.7500       27.0797          132       175     2012      12        21        356              0.301750       6.299377       2.866737       0.304798   -9999.000000   -9999.000000       0.066000       0.393000
57882     57882     hunan          113.7500       27.0797          132       175     2012      12        22        357              0.295917       4.568848       5.881886       0.297025   -9999.000000       0.286100       0.067400   -9999.000000
57882     57882     hunan          113.7500       27.0797          132       175     2012      12        23        358              0.291792       4.291168       1.383655       0.294010   -9999.000000   -9999.000000   -9999.000000       0.262000
57882     57882     hunan          113.7500       27.0797          132       175     2012      12        24        359              0.287833       4.932800       0.785052       0.291046       0.167000   -9999.000000   -9999.000000   -9999.000000
57882     57882     hunan          113.7500       27.0797          132       175     2012      12        25        360              0.285500       6.161774       0.863296       0.289000   -9999.000000   -9999.000000       0.092800       0.198000
57882     57882     hunan          113.7500       27.0797          132       175     2012      12        26        361              0.000000       5.306000      10.391780       0.289113   -9999.000000   -9999.000000       0.095300       0.264000
57882     57882     hunan          113.7500       27.0797          132       175     2012      12        27        362              0.331167       3.433258       6.806033       0.294074   -9999.000000       0.203100       0.097100   -9999.000000
57882     57882     hunan          113.7500       27.0797          132       175     2012      12        28        363              0.305500       3.619354       4.627580       0.298658       0.181000   -9999.000000   -9999.000000       0.481000
57882     57882     hunan          113.7500       27.0797          132       175     2012      12        29        364              0.000000       4.148590       5.140823       0.305739   -9999.000000   -9999.000000   -9999.000000   -9999.000000
57882     57882     hunan          113.7500       27.0797          132       175     2012      12        30        365              0.000000       2.997406       6.439661       0.300622   -9999.000000   -9999.000000   -9999.000000       0.080000
57882     57882     hunan          113.7500       27.0797          132       175     2012      12        31        366              0.294000       2.603241       1.667672       0.300215   -9999.000000   -9999.000000       0.115200       0.079000
