# Supplementary material for: Research on Fusing Multisatellite Soil Moisture Data Based on Bayesian Model Averaging
Source: Hindawi journal article supplement (doi:10.1155/2018/9310838), 2018-06-25
Supplement: f1 [file 9310838.f1.zip › 2012_sm00-10cm_daily_ZDB_ZHY_57889_366days_allin.txt]

57889     57889     hunan          113.9497       26.0797          136       176     2012      01        01        001              0.000000   -9999.000000       1.406739   -9999.000000       0.162000   -9999.000000       0.160200   -9999.000000
57889     57889     hunan          113.9497       26.0797          136       176     2012      01        02        002              0.261000       4.626282       3.006008       0.305030       0.187000   -9999.000000   -9999.000000   -9999.000000
57889     57889     hunan          113.9497       26.0797          136       176     2012      01        03        003              0.000000       5.343872       3.872468       0.303401       0.205000       0.041900   -9999.000000       0.179000
57889     57889     hunan          113.9497       26.0797          136       176     2012      01        04        004              0.263958       3.013641       1.820211       0.303034   -9999.000000   -9999.000000   -9999.000000   -9999.000000
57889     57889     hunan          113.9497       26.0797          136       176     2012      01        05        005              0.272000       1.561493       7.014762       0.285846   -9999.000000   -9999.000000       0.105300       0.841000
57889     57889     hunan          113.9497       26.0797          136       176     2012      01        06        006              0.273667       1.312836       2.759089       0.280836       0.227000   -9999.000000       0.099600       0.821000
57889     57889     hunan          113.9497       26.0797          136       176     2012      01        07        007              0.271708       1.756714       4.636964       0.291840       0.187000       0.170200       0.097800       0.400000
57889     57889     hunan          113.9497       26.0797          136       176     2012      01        08        008              0.000000       2.384857       5.739156       0.298957       0.188500   -9999.000000   -9999.000000       0.586000
57889     57889     hunan          113.9497       26.0797          136       176     2012      01        09        009              0.270000       2.974091       3.410505       0.299498   -9999.000000   -9999.000000   -9999.000000   -9999.000000
57889     57889     hunan          113.9497       26.0797          136       176     2012      01        10        010              0.269583       5.107239       3.457243       0.296526   -9999.000000       0.011700   -9999.000000       0.243000
57889     57889     hunan          113.9497       26.0797          136       176     2012      01        11        011              0.269000       5.424713       2.719916       0.294131       0.119000   -9999.000000       0.083000   -9999.000000
57889     57889     hunan          113.9497       26.0797          136       176     2012      01        12        012              0.268292       4.432892       1.804887       0.292371       0.129500       0.009500       0.088600       0.238000
57889     57889     hunan          113.9497       26.0797          136       176     2012      01        13        013              0.271500       5.249664       7.562999       0.290132       0.132500   -9999.000000       0.087300       0.529000
57889     57889     hunan          113.9497       26.0797          136       176     2012      01        14        014              0.280500       7.496643      17.059792       0.299125   -9999.000000   -9999.000000   -9999.000000   -9999.000000
57889     57889     hunan          113.9497       26.0797          136       176     2012      01        15        015              0.279250       7.278839      14.177773       0.313048   -9999.000000       0.249200   -9999.000000       0.425000
57889     57889     hunan          113.9497       26.0797          136       176     2012      01        16        016              0.275292       5.488953       0.361222       0.317022       0.121000   -9999.000000       0.059500   -9999.000000
57889     57889     hunan          113.9497       26.0797          136       176     2012      01        17        017              0.000000       5.614655       0.120579       0.299479       0.127500   -9999.000000       0.059400       0.255000
57889     57889     hunan          113.9497       26.0797          136       176     2012      01        18        018              0.277083       6.124237      12.748511       0.295416       0.145000       0.112700       0.060400       0.504000
57889     57889     hunan          113.9497       26.0797          136       176     2012      01        19        019              0.277083       6.093140       1.198679       0.309174       0.146000   -9999.000000   -9999.000000       0.439000
57889     57889     hunan          113.9497       26.0797          136       176     2012      01        20        020              0.275500       5.462677       3.303988       0.300278   -9999.000000       0.060800   -9999.000000       0.466000
57889     57889     hunan          113.9497       26.0797          136       176     2012      01        21        021              0.276833       5.114929      12.285021       0.298760   -9999.000000   -9999.000000   -9999.000000   -9999.000000
57889     57889     hunan          113.9497       26.0797          136       176     2012      01        22        022              0.277625       3.856628       1.611998       0.299194   -9999.000000   -9999.000000       0.062700       0.691000
57889     57889     hunan          113.9497       26.0797          136       176     2012      01        23        023              0.275208       3.021210       0.619268       0.297866   -9999.000000   -9999.000000       0.055800   -9999.000000
57889     57889     hunan          113.9497       26.0797          136       176     2012      01        24        024              0.276208       2.381958       0.910261       0.298370   -9999.000000   -9999.000000   -9999.000000       0.893000
57889     57889     hunan          113.9497       26.0797          136       176     2012      01        25        025              0.274542       1.621033       0.406080       0.288649   -9999.000000   -9999.000000   -9999.000000       0.901000
57889     57889     hunan          113.9497       26.0797          136       176     2012      01        26        026              0.274333       1.245117       2.218487       0.277996   -9999.000000       0.083800   -9999.000000   -9999.000000
57889     57889     hunan          113.9497       26.0797          136       176     2012      01        27        027              0.275000       1.148743       2.627395       0.279628       0.171000   -9999.000000   -9999.000000       0.441000
57889     57889     hunan          113.9497       26.0797          136       176     2012      01        28        028              0.274750       2.624603       0.435085       0.292223       0.161000   -9999.000000       0.046800   -9999.000000
57889     57889     hunan          113.9497       26.0797          136       176     2012      01        29        029              0.273750       3.300293       0.378975       0.288523       0.154500   -9999.000000       0.049200       0.310000
57889     57889     hunan          113.9497       26.0797          136       176     2012      01        30        030              0.273000       3.636108       0.069838       0.285675   -9999.000000   -9999.000000       0.046600       0.324000
57889     57889     hunan          113.9497       26.0797          136       176     2012      01        31        031              0.272042       3.151184       0.000000       0.283599   -9999.000000   -9999.000000   -9999.000000   -9999.000000
57889     57889     hunan          113.9497       26.0797          136       176     2012      02        01        032              0.271917       5.010498       0.278910       0.281851       0.131500   -9999.000000   -9999.000000       0.251000
57889     57889     hunan          113.9497       26.0797          136       176     2012      02        02        033              0.272167       5.243896       4.153326       0.282118       0.139500   -9999.000000       0.050100   -9999.000000
57889     57889     hunan          113.9497       26.0797          136       176     2012      02        03        034              0.275708       3.143738       1.693603       0.286812       0.139500   -9999.000000       0.045900       0.292000
57889     57889     hunan          113.9497       26.0797          136       176     2012      02        04        035              0.275333       3.927612       0.632613       0.290338   -9999.000000   -9999.000000       0.044400       0.305000
57889     57889     hunan          113.9497       26.0797          136       176     2012      02        05        036              0.274000       6.123627       0.244925       0.286327   -9999.000000   -9999.000000   -9999.000000       0.384000
57889     57889     hunan          113.9497       26.0797          136       176     2012      02        06        037              0.279917       9.510529       8.965077       0.283094       0.133000   -9999.000000   -9999.000000       0.681000
57889     57889     hunan          113.9497       26.0797          136       176     2012      02        07        038              0.276333       7.959686       0.000000       0.299550   -9999.000000   -9999.000000   -9999.000000   -9999.000000
57889     57889     hunan          113.9497       26.0797          136       176     2012      02        08        039              0.274458       5.328033       0.000000       0.285455   -9999.000000   -9999.000000       0.071100       0.005000
57889     57889     hunan          113.9497       26.0797          136       176     2012      02        09        040              0.274500       2.317810       0.823083       0.280000   -9999.000000   -9999.000000       0.077700   -9999.000000
57889     57889     hunan          113.9497       26.0797          136       176     2012      02        10        041              0.275417       3.087006       0.316322       0.281210   -9999.000000       0.085700       0.074900       0.155000
57889     57889     hunan          113.9497       26.0797          136       176     2012      02        11        042              0.274083       2.076660       0.554896       0.278874   -9999.000000   -9999.000000   -9999.000000       0.305000
57889     57889     hunan          113.9497       26.0797          136       176     2012      02        12        043              0.273167       2.808472       0.541202       0.279650       0.118000       0.094300   -9999.000000   -9999.000000
57889     57889     hunan          113.9497       26.0797          136       176     2012      02        13        044              0.272875       8.728302       0.000000       0.279562       0.112000       0.062800   -9999.000000       0.346000
57889     57889     hunan          113.9497       26.0797          136       176     2012      02        14        045              0.272000      11.642456       0.522531       0.277806       0.115500   -9999.000000       0.079400   -9999.000000
57889     57889     hunan          113.9497       26.0797          136       176     2012      02        15        046              0.271500      13.100037       0.473880       0.276436   -9999.000000       0.408700       0.085500       0.058000
57889     57889     hunan          113.9497       26.0797          136       176     2012      02        16        047              0.271000       8.187500       0.180897       0.276367   -9999.000000   -9999.000000       0.080900       0.224000
57889     57889     hunan          113.9497       26.0797          136       176     2012      02        17        048              0.270208       5.016846       0.000000       0.276373       0.129000   -9999.000000   -9999.000000       0.130000
57889     57889     hunan          113.9497       26.0797          136       176     2012      02        18        049              0.270000       3.564636       0.000000       0.275812       0.119000       0.014400   -9999.000000       0.015000
57889     57889     hunan          113.9497       26.0797          136       176     2012      02        19        050              0.269583       2.910126       0.000000       0.274563       0.112500   -9999.000000       0.081400   -9999.000000
57889     57889     hunan          113.9497       26.0797          136       176     2012      02        20        051              0.269000       6.833893       0.536014       0.272924   -9999.000000       0.094800       0.076800       0.276000
57889     57889     hunan          113.9497       26.0797          136       176     2012      02        21        052              0.269000      10.234955       0.404227       0.273875   -9999.000000   -9999.000000   -9999.000000   -9999.000000
57889     57889     hunan          113.9497       26.0797          136       176     2012      02        22        053              0.269000      13.340210       0.000000       0.272871       0.088000   -9999.000000   -9999.000000       0.332000
57889     57889     hunan          113.9497       26.0797          136       176     2012      02        23        054              0.271458      14.182129       3.061440       0.272152       0.095000   -9999.000000   -9999.000000       0.329000
57889     57889     hunan          113.9497       26.0797          136       176     2012      02        24        055              0.273625      12.082886       0.445481       0.277825       0.110500   -9999.000000   -9999.000000   -9999.000000
57889     57889     hunan          113.9497       26.0797          136       176     2012      02        25        056              0.272250       9.344299       0.164878       0.275678       0.114000   -9999.000000       0.082700       0.207000
57889     57889     hunan          113.9497       26.0797          136       176     2012      02        26        057              0.271208       5.832550       0.689335       0.272561   -9999.000000   -9999.000000       0.084500   -9999.000000
57889     57889     hunan          113.9497       26.0797          136       176     2012      02        27        058              0.279833       3.570831      14.617762       0.271505   -9999.000000   -9999.000000   -9999.000000       0.691000
57889     57889     hunan          113.9497       26.0797          136       176     2012      02        28        059              0.278875       2.689331       5.113325       0.285971       0.116000   -9999.000000   -9999.000000       0.808000
57889     57889     hunan          113.9497       26.0797          136       176     2012      02        29        060              0.000000   -9999.000000       0.311709   -9999.000000       0.118000   -9999.000000   -9999.000000   -9999.000000
57889     57889     hunan          113.9497       26.0797          136       176     2012      03        01        061              0.276042       4.011505       1.093550       0.304413       0.135000       0.092500   -9999.000000       0.325000
57889     57889     hunan          113.9497       26.0797          136       176     2012      03        02        062              0.278083       8.847717       2.158517       0.286662   -9999.000000       0.177300       0.065100   -9999.000000
57889     57889     hunan          113.9497       26.0797          136       176     2012      03        03        063              0.278333       8.059814       6.362601       0.283599   -9999.000000   -9999.000000       0.058900       0.803000
57889     57889     hunan          113.9497       26.0797          136       176     2012      03        04        064              0.282208       9.493286      38.160461       0.289816       0.149000       0.400200       0.061200       0.741000
57889     57889     hunan          113.9497       26.0797          136       176     2012      03        05        065              0.281083      11.039276      14.902965       0.325451       0.143500   -9999.000000   -9999.000000       0.667000
57889     57889     hunan          113.9497       26.0797          136       176     2012      03        06        066              0.282583      10.669830      18.402861       0.316522       0.142500       0.133500   -9999.000000       0.644000
57889     57889     hunan          113.9497       26.0797          136       176     2012      03        07        067              0.000000       9.611267       0.602886       0.318956   -9999.000000   -9999.000000       0.055200   -9999.000000
57889     57889     hunan          113.9497       26.0797          136       176     2012      03        08        068              0.275708       8.328400       0.387143       0.300829   -9999.000000   -9999.000000       0.058500       0.531000
57889     57889     hunan          113.9497       26.0797          136       176     2012      03        09        069              0.274875       6.876862       0.271964       0.295268       0.134500       0.019700       0.056300   -9999.000000
57889     57889     hunan          113.9497       26.0797          136       176     2012      03        10        070              0.274000       5.297424       0.178055       0.292512       0.119500   -9999.000000   -9999.000000       0.298000
57889     57889     hunan          113.9497       26.0797          136       176     2012      03        11        071              0.273417       5.597015       0.000000       0.289525       0.090500   -9999.000000   -9999.000000       0.484000
57889     57889     hunan          113.9497       26.0797          136       176     2012      03        12        072              0.273000       5.836456       0.407760       0.287007   -9999.000000       0.086500   -9999.000000   -9999.000000
57889     57889     hunan          113.9497       26.0797          136       176     2012      03        13        073              0.272667       6.915741       0.392957       0.284806   -9999.000000   -9999.000000       0.043500       0.272000
57889     57889     hunan          113.9497       26.0797          136       176     2012      03        14        074              0.272417       7.775696       0.430086       0.283737       0.096000   -9999.000000       0.041600   -9999.000000
57889     57889     hunan          113.9497       26.0797          136       176     2012      03        15        075              0.274125       9.020691       0.437291       0.283001       0.076500   -9999.000000       0.042200       0.614000
57889     57889     hunan          113.9497       26.0797          136       176     2012      03        16        076              0.274000      12.501068       5.034611       0.282858       0.080000   -9999.000000   -9999.000000       0.711000
57889     57889     hunan          113.9497       26.0797          136       176     2012      03        17        077              0.273833      15.603882       5.140562       0.280567       0.084000       0.208000   -9999.000000       0.709000
57889     57889     hunan          113.9497       26.0797          136       176     2012      03        18        078              0.277000      15.902283      12.030771       0.290420   -9999.000000   -9999.000000   -9999.000000       0.915000
57889     57889     hunan          113.9497       26.0797          136       176     2012      03        19        079              0.276875      16.386322       0.994526       0.301921       0.087000       0.105100       0.065100   -9999.000000
57889     57889     hunan          113.9497       26.0797          136       176     2012      03        20        080              0.279000      17.802826       1.656815       0.291161       0.089000   -9999.000000       0.064600       0.519000
57889     57889     hunan          113.9497       26.0797          136       176     2012      03        21        081              0.276500      15.670685       1.064306       0.284992       0.089000   -9999.000000       0.061400   -9999.000000
57889     57889     hunan          113.9497       26.0797          136       176     2012      03        22        082              0.275208      17.019012       2.072807       0.281884       0.084500       0.346700   -9999.000000       0.573000
57889     57889     hunan          113.9497       26.0797          136       176     2012      03        23        083              0.277708      16.809570       1.923898       0.280696   -9999.000000   -9999.000000   -9999.000000       0.326000
57889     57889     hunan          113.9497       26.0797          136       176     2012      03        24        084              0.275333       9.619812       0.487695       0.285562   -9999.000000       0.269400   -9999.000000   -9999.000000
57889     57889     hunan          113.9497       26.0797          136       176     2012      03        25        085              0.000000      11.811310       1.868152       0.277797       0.074500   -9999.000000       0.060400       0.354000
57889     57889     hunan          113.9497       26.0797          136       176     2012      03        26        086              0.272083      12.875488       1.740088       0.274083       0.072500   -9999.000000       0.064500   -9999.000000
57889     57889     hunan          113.9497       26.0797          136       176     2012      03        27        087              0.270583      14.424622       0.000000       0.271658       0.068500       0.082700   -9999.000000       0.374000
57889     57889     hunan          113.9497       26.0797          136       176     2012      03        28        088              0.270125      15.606842       4.891548       0.269930   -9999.000000   -9999.000000   -9999.000000       0.417000
57889     57889     hunan          113.9497       26.0797          136       176     2012      03        29        089              0.276000      16.533783       0.219177       0.275727   -9999.000000   -9999.000000   -9999.000000   -9999.000000
57889     57889     hunan          113.9497       26.0797          136       176     2012      03        30        090              0.274500      16.150726       3.898742       0.280283       0.083000       0.048500       0.067400       0.500000
57889     57889     hunan          113.9497       26.0797          136       176     2012      03        31        091              0.274042      15.572968       0.000000       0.281946       0.067500   -9999.000000       0.066400   -9999.000000
57889     57889     hunan          113.9497       26.0797          136       176     2012      04        01        092              0.272625      14.725525       0.000000       0.275230       0.097500   -9999.000000       0.063400       0.408000
57889     57889     hunan          113.9497       26.0797          136       176     2012      04        02        093              0.271500      16.298950       0.204815       0.270058   -9999.000000   -9999.000000   -9999.000000       0.401000
57889     57889     hunan          113.9497       26.0797          136       176     2012      04        03        094              0.270125      17.960541       0.461804       0.267289   -9999.000000   -9999.000000   -9999.000000       0.280000
57889     57889     hunan          113.9497       26.0797          136       176     2012      04        04        095              0.269000      16.375702       1.278268       0.265247       0.118000   -9999.000000       0.058500       0.446000
57889     57889     hunan          113.9497       26.0797          136       176     2012      04        05        096              0.269917      16.026031       0.342271       0.267904       0.111500   -9999.000000       0.059600   -9999.000000
57889     57889     hunan          113.9497       26.0797          136       176     2012      04        06        097              0.272417      14.434021       3.722008       0.269887       0.111000       0.091000       0.061900       0.579000
57889     57889     hunan          113.9497       26.0797          136       176     2012      04        07        098              0.276292      12.912109      13.051651       0.277181       0.119000       0.018100       0.059000   -9999.000000
57889     57889     hunan          113.9497       26.0797          136       176     2012      04        08        099              0.279333      14.011627       5.670998       0.291287   -9999.000000   -9999.000000   -9999.000000       0.651000
57889     57889     hunan          113.9497       26.0797          136       176     2012      04        09        100              0.276375      14.426422       1.388200       0.296452   -9999.000000   -9999.000000   -9999.000000       0.729000
57889     57889     hunan          113.9497       26.0797          136       176     2012      04        10        101              0.274792      16.265656       2.590158       0.282657       0.099500   -9999.000000       0.051900   -9999.000000
57889     57889     hunan          113.9497       26.0797          136       176     2012      04        11        102              0.274500      18.718353       3.749119       0.275339       0.124500   -9999.000000       0.054400       0.740000
57889     57889     hunan          113.9497       26.0797          136       176     2012      04        12        103              0.280667      19.272430      17.314732       0.279124   -9999.000000   -9999.000000       0.050000   -9999.000000
57889     57889     hunan          113.9497       26.0797          136       176     2012      04        13        104              0.278375      18.431976       1.022913       0.302054   -9999.000000   -9999.000000   -9999.000000       0.599000
57889     57889     hunan          113.9497       26.0797          136       176     2012      04        14        105              0.276042      17.143372       0.847043       0.289354   -9999.000000       0.061000   -9999.000000       0.724000
57889     57889     hunan          113.9497       26.0797          136       176     2012      04        15        106              0.274583      18.759552       0.130885       0.278263       0.157000   -9999.000000   -9999.000000       0.672000
57889     57889     hunan          113.9497       26.0797          136       176     2012      04        16        107              0.274000      18.139160       0.792287       0.274277       0.131000       0.008500       0.103400       0.727000
57889     57889     hunan          113.9497       26.0797          136       176     2012      04        17        108              0.275208      15.868530       9.970306       0.274533       0.155000       0.099000       0.093300   -9999.000000
57889     57889     hunan          113.9497       26.0797          136       176     2012      04        18        109              0.281208      16.558533      24.001287       0.295547   -9999.000000   -9999.000000   -9999.000000       0.700000
57889     57889     hunan          113.9497       26.0797          136       176     2012      04        19        110              0.279542      17.382019       1.372962       0.315976   -9999.000000       0.108100   -9999.000000   -9999.000000
57889     57889     hunan          113.9497       26.0797          136       176     2012      04        20        111              0.279375      18.285645       4.882097       0.293379       0.143000   -9999.000000   -9999.000000       0.725000
57889     57889     hunan          113.9497       26.0797          136       176     2012      04        21        112              0.276000      17.688904       0.000000       0.292733       0.107000   -9999.000000       0.100800       0.763000
57889     57889     hunan          113.9497       26.0797          136       176     2012      04        22        113              0.273667      18.154938       0.000000       0.279327       0.108000   -9999.000000       0.100900   -9999.000000
57889     57889     hunan          113.9497       26.0797          136       176     2012      04        23        114              0.276417      19.435608      12.593799       0.273727   -9999.000000   -9999.000000       0.124500       0.734000
57889     57889     hunan          113.9497       26.0797          136       176     2012      04        24        115              0.277833      19.112793       4.637110       0.298481   -9999.000000       0.037800   -9999.000000   -9999.000000
57889     57889     hunan          113.9497       26.0797          136       176     2012      04        25        116              0.000000      20.786926       1.662695       0.291634       0.138000   -9999.000000   -9999.000000       0.744000
57889     57889     hunan          113.9497       26.0797          136       176     2012      04        26        117              0.276833      17.078888       9.872461       0.287603       0.124000   -9999.000000   -9999.000000       0.667000
57889     57889     hunan          113.9497       26.0797          136       176     2012      04        27        118              0.279667      18.046509       3.296484       0.285546       0.120000   -9999.000000   -9999.000000   -9999.000000
57889     57889     hunan          113.9497       26.0797          136       176     2012      04        28        119              0.276625      18.268188       0.576562       0.297707       0.130000   -9999.000000       0.124400       0.712000
57889     57889     hunan          113.9497       26.0797          136       176     2012      04        29        120              0.276208      19.465515      17.824072       0.283441   -9999.000000       0.093200       0.120700   -9999.000000
57889     57889     hunan          113.9497       26.0797          136       176     2012      04        30        121              0.279792      21.412872      46.247849       0.292125   -9999.000000       0.090200   -9999.000000       0.689000
57889     57889     hunan          113.9497       26.0797          136       176     2012      05        01        122              0.281208      22.934204      11.233576       0.331294       0.175500   -9999.000000   -9999.000000       0.645000
57889     57889     hunan          113.9497       26.0797          136       176     2012      05        02        123              0.280958      22.515533       8.935244       0.322143       0.192500       0.190700   -9999.000000       0.622000
57889     57889     hunan          113.9497       26.0797          136       176     2012      05        03        124              0.282167      21.436829      21.103872       0.313631       0.179500   -9999.000000       0.092700       0.822000
57889     57889     hunan          113.9497       26.0797          136       176     2012      05        04        125              0.277875      21.237854       0.568564       0.326972   -9999.000000       0.100400       0.088400   -9999.000000
57889     57889     hunan          113.9497       26.0797          136       176     2012      05        05        126              0.275667      20.596527       1.184842       0.309190   -9999.000000   -9999.000000       0.084800       0.644000
57889     57889     hunan          113.9497       26.0797          136       176     2012      05        06        127              0.274250      20.608276       0.899309       0.301767       0.154000   -9999.000000   -9999.000000   -9999.000000
57889     57889     hunan          113.9497       26.0797          136       176     2012      05        07        128              0.272833      21.617188       0.063380       0.297118   -9999.000000       0.315800   -9999.000000       0.543000
57889     57889     hunan          113.9497       26.0797          136       176     2012      05        08        129              0.270667      22.759125       0.000000       0.290344       0.149000   -9999.000000       0.140400       0.646000
57889     57889     hunan          113.9497       26.0797          136       176     2012      05        09        130              0.268875      23.221283       9.282296       0.284624   -9999.000000   -9999.000000       0.141500   -9999.000000
57889     57889     hunan          113.9497       26.0797          136       176     2012      05        10        131              0.274125      23.337952       1.645555       0.290486   -9999.000000   -9999.000000       0.147400       0.736000
57889     57889     hunan          113.9497       26.0797          136       176     2012      05        11        132              0.278000      21.886078      16.178217       0.293148       0.168000   -9999.000000   -9999.000000   -9999.000000
57889     57889     hunan          113.9497       26.0797          136       176     2012      05        12        133              0.280917      21.906586      31.017656       0.307107       0.170000       0.186500   -9999.000000       0.912000
57889     57889     hunan          113.9497       26.0797          136       176     2012      05        13        134              0.281917      21.803589      16.048874       0.321354       0.170000   -9999.000000   -9999.000000       1.000000
57889     57889     hunan          113.9497       26.0797          136       176     2012      05        14        135              0.281292      20.702240       3.816991       0.324331       0.194000   -9999.000000       0.097900       0.948000
57889     57889     hunan          113.9497       26.0797          136       176     2012      05        15        136              0.278542      20.649872       0.777119       0.308333   -9999.000000       0.126100       0.099300       0.855000
57889     57889     hunan          113.9497       26.0797          136       176     2012      05        16        137              0.276625      19.031525       0.099079       0.299885       0.159000   -9999.000000       0.089400   -9999.000000
57889     57889     hunan          113.9497       26.0797          136       176     2012      05        17        138              0.275042      19.745972       6.993723       0.293733       0.160000       0.047300   -9999.000000       0.542000
57889     57889     hunan          113.9497       26.0797          136       176     2012      05        18        139              0.273083      20.605804       1.412071       0.288712       0.158000   -9999.000000   -9999.000000   -9999.000000
57889     57889     hunan          113.9497       26.0797          136       176     2012      05        19        140              0.271417      22.125397       0.138022       0.287347       0.160000   -9999.000000   -9999.000000       0.615000
57889     57889     hunan          113.9497       26.0797          136       176     2012      05        20        141              0.269000      22.371216       0.000000       0.283634   -9999.000000       0.167100       0.086500       0.620000
57889     57889     hunan          113.9497       26.0797          136       176     2012      05        21        142              0.266583      21.924103       0.000000       0.277521   -9999.000000   -9999.000000       0.130100   -9999.000000
57889     57889     hunan          113.9497       26.0797          136       176     2012      05        22        143              0.264667      21.626801       0.979594       0.274712       0.175000       0.177400       0.133700       0.518000
57889     57889     hunan          113.9497       26.0797          136       176     2012      05        23        144              0.264167      22.270721       0.320882       0.275486   -9999.000000   -9999.000000   -9999.000000   -9999.000000
57889     57889     hunan          113.9497       26.0797          136       176     2012      05        24        145              0.269875      22.288116       3.419549       0.275430       0.194000   -9999.000000   -9999.000000       0.726000
57889     57889     hunan          113.9497       26.0797          136       176     2012      05        25        146              0.000000      21.548096       0.317526       0.280922   -9999.000000   -9999.000000       0.137500       0.672000
57889     57889     hunan          113.9497       26.0797          136       176     2012      05        26        147              0.271625      20.168671       0.140866       0.277969   -9999.000000   -9999.000000       0.130800   -9999.000000
57889     57889     hunan          113.9497       26.0797          136       176     2012      05        27        148              0.277125      20.401215       8.276918       0.274717       0.172000   -9999.000000       0.132800       0.850000
57889     57889     hunan          113.9497       26.0797          136       176     2012      05        28        149              0.276125      21.455475       1.110097       0.288723       0.163500   -9999.000000   -9999.000000   -9999.000000
57889     57889     hunan          113.9497       26.0797          136       176     2012      05        29        150              0.278708      21.958527      23.940304       0.279554       0.176000   -9999.000000   -9999.000000       0.891000
57889     57889     hunan          113.9497       26.0797          136       176     2012      05        30        151              0.279958      22.217682       1.034958       0.301956   -9999.000000       0.104600   -9999.000000   -9999.000000
57889     57889     hunan          113.9497       26.0797          136       176     2012      05        31        152              0.276917      20.758301       0.527505       0.298202   -9999.000000   -9999.000000   -9999.000000   -9999.000000
57889     57889     hunan          113.9497       26.0797          136       176     2012      06        01        153              0.276667      20.597534       4.570054       0.282609       0.321000   -9999.000000       0.145200       0.750000
57889     57889     hunan          113.9497       26.0797          136       176     2012      06        02        154              0.276542      19.932098       0.485249       0.287932       0.301000       0.235700       0.139300   -9999.000000
57889     57889     hunan          113.9497       26.0797          136       176     2012      06        03        155              0.275500      19.201904       0.114761       0.282293       0.270500   -9999.000000   -9999.000000       0.743000
57889     57889     hunan          113.9497       26.0797          136       176     2012      06        04        156              0.274500      19.789429       0.634161       0.277967       0.279000       0.119200   -9999.000000   -9999.000000
57889     57889     hunan          113.9497       26.0797          136       176     2012      06        05        157              0.274000      20.862854       0.989995       0.277157   -9999.000000   -9999.000000   -9999.000000       0.652000
57889     57889     hunan          113.9497       26.0797          136       176     2012      06        06        158              0.274000      22.128326       2.233757       0.277086   -9999.000000   -9999.000000       0.059400       0.925000
57889     57889     hunan          113.9497       26.0797          136       176     2012      06        07        159              0.272958      22.350128       0.296238       0.280135       0.248000       0.314800       0.059200   -9999.000000
57889     57889     hunan          113.9497       26.0797          136       176     2012      06        08        160              0.274000      24.013916       6.336200       0.274123       0.242500   -9999.000000       0.051400       0.824000
57889     57889     hunan          113.9497       26.0797          136       176     2012      06        09        161              0.275708      24.370697       6.963872       0.280887       0.253000       0.240400   -9999.000000   -9999.000000
57889     57889     hunan          113.9497       26.0797          136       176     2012      06        10        162              0.277250      24.457794      17.278320       0.291964   -9999.000000       0.193300   -9999.000000       0.852000
57889     57889     hunan          113.9497       26.0797          136       176     2012      06        11        163              0.000000      24.481934       9.265561       0.298589   -9999.000000   -9999.000000       0.065000       0.896000
57889     57889     hunan          113.9497       26.0797          136       176     2012      06        12        164              0.276958      22.631165       1.257046       0.304530       0.132000       0.226700       0.063900       0.631000
57889     57889     hunan          113.9497       26.0797          136       176     2012      06        13        165              0.274708      24.205872       0.615855       0.282079       0.120000   -9999.000000       0.061700       0.594000
57889     57889     hunan          113.9497       26.0797          136       176     2012      06        14        166              0.272583      23.578461       1.438397       0.276386       0.119500   -9999.000000   -9999.000000   -9999.000000
57889     57889     hunan          113.9497       26.0797          136       176     2012      06        15        167              0.271500      23.821869       2.544531       0.275272   -9999.000000   -9999.000000   -9999.000000       0.630000
57889     57889     hunan          113.9497       26.0797          136       176     2012      06        16        168              0.270708      22.761505       3.992702       0.272730   -9999.000000   -9999.000000   -9999.000000   -9999.000000
57889     57889     hunan          113.9497       26.0797          136       176     2012      06        17        169              0.280083      23.203430      17.674875       0.275373       0.145500       0.056100       0.064500       0.825000
57889     57889     hunan          113.9497       26.0797          136       176     2012      06        18        170              0.279083      23.052277      13.079889       0.305629       0.109500   -9999.000000       0.072100       0.761000
57889     57889     hunan          113.9497       26.0797          136       176     2012      06        19        171              0.279958      23.748840       0.978151       0.303684       0.126500   -9999.000000       0.067900   -9999.000000
57889     57889     hunan          113.9497       26.0797          136       176     2012      06        20        172              0.275042      23.770264       0.000000       0.286899       0.109000       0.168000   -9999.000000       0.518000
57889     57889     hunan          113.9497       26.0797          136       176     2012      06        21        173              0.275750      24.120361      10.617437       0.277039   -9999.000000   -9999.000000   -9999.000000   -9999.000000
57889     57889     hunan          113.9497       26.0797          136       176     2012      06        22        174              0.279958      23.610962      22.964632       0.293515       0.247000       0.075900   -9999.000000       0.975000
57889     57889     hunan          113.9497       26.0797          136       176     2012      06        23        175              0.283375      22.560822      43.324814       0.313853   -9999.000000       0.239000       0.070700       1.000000
57889     57889     hunan          113.9497       26.0797          136       176     2012      06        24        176              0.280583      21.927673      16.300983       0.339770       0.200500   -9999.000000       0.070800   -9999.000000
57889     57889     hunan          113.9497       26.0797          136       176     2012      06        25        177              0.277792      23.179443       6.361082       0.338354       0.189000       0.457000       0.092800       0.705000
57889     57889     hunan          113.9497       26.0797          136       176     2012      06        26        178              0.279417      23.642212       4.777633       0.311929   -9999.000000   -9999.000000   -9999.000000   -9999.000000
57889     57889     hunan          113.9497       26.0797          136       176     2012      06        27        179              0.277708      23.593872       1.422024       0.306746   -9999.000000       0.079700   -9999.000000       0.829000
57889     57889     hunan          113.9497       26.0797          136       176     2012      06        28        180              0.275542      23.535034       0.000000       0.297425       0.168000       0.063000       0.088400       0.631000
57889     57889     hunan          113.9497       26.0797          136       176     2012      06        29        181              0.272792      25.156799       0.793306       0.288782       0.164000   -9999.000000       0.090300   -9999.000000
57889     57889     hunan          113.9497       26.0797          136       176     2012      06        30        182              0.270917      25.603455       0.577954       0.284879       0.174000   -9999.000000       0.091700   -9999.000000
57889     57889     hunan          113.9497       26.0797          136       176     2012      07        01        183              0.268875      24.342621       0.000000       0.281702   -9999.000000   -9999.000000   -9999.000000   -9999.000000
57889     57889     hunan          113.9497       26.0797          136       176     2012      07        02        184              0.266042      24.338654       0.000000       0.277010   -9999.000000   -9999.000000   -9999.000000       0.541000
57889     57889     hunan          113.9497       26.0797          136       176     2012      07        03        185              0.262792      24.805084       0.000000       0.272245       0.210500       0.301100   -9999.000000   -9999.000000
57889     57889     hunan          113.9497       26.0797          136       176     2012      07        04        186              0.259375      25.041229       0.000000       0.269278       0.211000   -9999.000000       0.089700       0.457000
57889     57889     hunan          113.9497       26.0797          136       176     2012      07        05        187              0.256917      25.570496       1.939701       0.266757       0.198000       0.051200       0.091000       0.640000
57889     57889     hunan          113.9497       26.0797          136       176     2012      07        06        188              0.255333      25.583862       0.921513       0.268275   -9999.000000   -9999.000000       0.089800   -9999.000000
57889     57889     hunan          113.9497       26.0797          136       176     2012      07        07        189              0.254167      25.366791       0.542983       0.268157   -9999.000000   -9999.000000   -9999.000000       0.418000
57889     57889     hunan          113.9497       26.0797          136       176     2012      07        08        190              0.252500      25.361206       0.000000       0.263772       0.207000       0.295900   -9999.000000   -9999.000000
57889     57889     hunan          113.9497       26.0797          136       176     2012      07        09        191              0.251417      25.468994       0.000000       0.259716       0.194500   -9999.000000       0.127800       0.510000
57889     57889     hunan          113.9497       26.0797          136       176     2012      07        10        192              0.250125      25.895691       0.000000       0.255731       0.204000       0.105800       0.124800       0.697000
57889     57889     hunan          113.9497       26.0797          136       176     2012      07        11        193              0.248667      26.101898       0.000000       0.252711       0.245000   -9999.000000       0.124600       0.433000
57889     57889     hunan          113.9497       26.0797          136       176     2012      07        12        194              0.247583      26.230774       0.000000       0.250225   -9999.000000   -9999.000000   -9999.000000       0.590000
57889     57889     hunan          113.9497       26.0797          136       176     2012      07        13        195              0.246667      26.001221       0.000000       0.247089   -9999.000000       0.392400   -9999.000000   -9999.000000
57889     57889     hunan          113.9497       26.0797          136       176     2012      07        14        196              0.246000      25.920715       0.535045       0.243854       0.254000   -9999.000000   -9999.000000       0.376000
57889     57889     hunan          113.9497       26.0797          136       176     2012      07        15        197              0.246000      25.937561       9.340386       0.242795       0.279500       0.167600       0.126000   -9999.000000
57889     57889     hunan          113.9497       26.0797          136       176     2012      07        16        198              0.249500      24.412720       4.252337       0.277734       0.290000   -9999.000000       0.069000       0.688000
57889     57889     hunan          113.9497       26.0797          136       176     2012      07        17        199              0.251375      24.755615       0.274701       0.273852   -9999.000000   -9999.000000       0.067900       0.615000
57889     57889     hunan          113.9497       26.0797          136       176     2012      07        18        200              0.251000      25.101685       7.477773       0.263316   -9999.000000       0.226200   -9999.000000   -9999.000000
57889     57889     hunan          113.9497       26.0797          136       176     2012      07        19        201              0.252917      24.667572       6.976290       0.277947       0.274000   -9999.000000   -9999.000000       0.588000
57889     57889     hunan          113.9497       26.0797          136       176     2012      07        20        202              0.265750      24.404602       5.219347       0.283913       0.259000   -9999.000000   -9999.000000   -9999.000000
57889     57889     hunan          113.9497       26.0797          136       176     2012      07        21        203              0.266696      24.173645       9.088409       0.282656       0.218000   -9999.000000       0.068900       0.737000
57889     57889     hunan          113.9497       26.0797          136       176     2012      07        22        204              0.269042      25.414459      19.869602       0.287229       0.218000   -9999.000000       0.074100       0.658000
57889     57889     hunan          113.9497       26.0797          136       176     2012      07        23        205              0.269583      25.962860       6.119370       0.301903   -9999.000000       0.039100       0.054000   -9999.000000
57889     57889     hunan          113.9497       26.0797          136       176     2012      07        24        206              0.271167      24.618347       6.817261       0.291474       0.258000   -9999.000000   -9999.000000       0.805000
57889     57889     hunan          113.9497       26.0797          136       176     2012      07        25        207              0.270750      23.569031       1.804947       0.292256       0.252000   -9999.000000   -9999.000000   -9999.000000
57889     57889     hunan          113.9497       26.0797          136       176     2012      07        26        208              0.269542      24.026825       2.142375       0.281316       0.234000       0.231600       0.061700       0.750000
57889     57889     hunan          113.9497       26.0797          136       176     2012      07        27        209              0.269167      24.514893       7.126617       0.276676       0.240000   -9999.000000       0.059100       0.684000
57889     57889     hunan          113.9497       26.0797          136       176     2012      07        28        210              0.268000      24.577576       0.000000       0.283397   -9999.000000   -9999.000000       0.058700       0.517000
57889     57889     hunan          113.9497       26.0797          136       176     2012      07        29        211              0.266500      24.922180       5.608588       0.272401   -9999.000000   -9999.000000   -9999.000000       0.735000
57889     57889     hunan          113.9497       26.0797          136       176     2012      07        30        212              0.265375      24.846771       2.299628       0.279882       0.221000   -9999.000000   -9999.000000   -9999.000000
57889     57889     hunan          113.9497       26.0797          136       176     2012      07        31        213              0.263500      24.934296       0.662819       0.274396       0.215000       0.462700   -9999.000000       0.500000
57889     57889     hunan          113.9497       26.0797          136       176     2012      08        01        214              0.261750      25.235840       0.000000       0.266228       0.203500   -9999.000000       0.076100   -9999.000000
57889     57889     hunan          113.9497       26.0797          136       176     2012      08        02        215              0.259833      25.174133       0.165498       0.259806   -9999.000000       0.109800       0.079300       0.412000
57889     57889     hunan          113.9497       26.0797          136       176     2012      08        03        216              0.259000      25.075378       1.922286       0.255551   -9999.000000       0.146700       0.077900       0.631000
57889     57889     hunan          113.9497       26.0797          136       176     2012      08        04        217              0.270875      23.902130      59.752205       0.258328       0.287000   -9999.000000   -9999.000000   -9999.000000
57889     57889     hunan          113.9497       26.0797          136       176     2012      08        05        218              0.272917      22.652893       2.034939       0.334638       0.227000       0.130300   -9999.000000       0.586000
57889     57889     hunan          113.9497       26.0797          136       176     2012      08        06        219              0.270417      22.536377       3.799145       0.299567       0.211500   -9999.000000   -9999.000000   -9999.000000
57889     57889     hunan          113.9497       26.0797          136       176     2012      08        07        220              0.268792      24.137817       1.698986       0.292258       0.218000   -9999.000000       0.069500       0.538000
57889     57889     hunan          113.9497       26.0797          136       176     2012      08        08        221              0.266917      24.366730       1.819995       0.284211   -9999.000000       0.065300       0.072500       0.705000
57889     57889     hunan          113.9497       26.0797          136       176     2012      08        09        222              0.265208      24.762604       0.485958       0.280270   -9999.000000   -9999.000000       0.070700       0.551000
57889     57889     hunan          113.9497       26.0797          136       176     2012      08        10        223              0.264417      24.641235      20.956556       0.276746       0.204000   -9999.000000   -9999.000000       0.706000
57889     57889     hunan          113.9497       26.0797          136       176     2012      08        11        224              0.272833      23.809326      22.897682       0.289859       0.187500   -9999.000000   -9999.000000   -9999.000000
57889     57889     hunan          113.9497       26.0797          136       176     2012      08        12        225              0.270417      24.056580       0.784158       0.313725       0.189000   -9999.000000       0.072400       0.522000
57889     57889     hunan          113.9497       26.0797          136       176     2012      08        13        226              0.274417      24.231445      22.130568       0.290627   -9999.000000       0.215600       0.069900   -9999.000000
57889     57889     hunan          113.9497       26.0797          136       176     2012      08        14        227              0.271625      24.415894       0.232298       0.314783   -9999.000000   -9999.000000       0.067600       0.634000
57889     57889     hunan          113.9497       26.0797          136       176     2012      08        15        228              0.269833      25.172028       2.297215       0.292502       0.179500       0.101900   -9999.000000       0.763000
57889     57889     hunan          113.9497       26.0797          136       176     2012      08        16        229              0.269000      25.666626       2.969445       0.289138       0.165500   -9999.000000   -9999.000000   -9999.000000
57889     57889     hunan          113.9497       26.0797          136       176     2012      08        17        230              0.268542      25.692535       0.104427       0.288629       0.186000   -9999.000000   -9999.000000       0.517000
57889     57889     hunan          113.9497       26.0797          136       176     2012      08        18        231              0.269000      25.415100       2.711127       0.282140       0.184000       0.104900       0.067300   -9999.000000
57889     57889     hunan          113.9497       26.0797          136       176     2012      08        19        232              0.269792      25.730927      15.136894       0.282894   -9999.000000   -9999.000000       0.068100       0.655000
57889     57889     hunan          113.9497       26.0797          136       176     2012      08        20        233              0.268583      24.579712       6.074130       0.305345       0.178000       0.110900       0.051300       0.651000
57889     57889     hunan          113.9497       26.0797          136       176     2012      08        21        234              0.268583      24.634338       5.169124       0.296303       0.252000       0.122600   -9999.000000   -9999.000000
57889     57889     hunan          113.9497       26.0797          136       176     2012      08        22        235              0.275792      24.890839      56.975033       0.293332       0.284000   -9999.000000   -9999.000000   -9999.000000
57889     57889     hunan          113.9497       26.0797          136       176     2012      08        23        236              0.273792      23.491119       0.879912       0.336501       0.301000       0.253500   -9999.000000   -9999.000000
57889     57889     hunan          113.9497       26.0797          136       176     2012      08        24        237              0.272083      22.440094       1.959507       0.312242   -9999.000000   -9999.000000       0.057300   -9999.000000
57889     57889     hunan          113.9497       26.0797          136       176     2012      08        25        238              0.000000      22.250458       0.707072       0.304284   -9999.000000   -9999.000000       0.051700   -9999.000000
57889     57889     hunan          113.9497       26.0797          136       176     2012      08        26        239              0.269833      23.327148       1.283480       0.298962       0.244500       0.193300       0.046800       0.549000
57889     57889     hunan          113.9497       26.0797          136       176     2012      08        27        240              0.268667      24.000702       0.470376       0.294790       0.234000   -9999.000000   -9999.000000       0.704000
57889     57889     hunan          113.9497       26.0797          136       176     2012      08        28        241              0.267583      24.099213       0.600642       0.288617       0.239500   -9999.000000   -9999.000000   -9999.000000
57889     57889     hunan          113.9497       26.0797          136       176     2012      08        29        242              0.266542      23.833221       6.423324       0.283559   -9999.000000   -9999.000000       0.090600       0.542000
57889     57889     hunan          113.9497       26.0797          136       176     2012      08        30        243              0.267125      24.362701       3.777481       0.278353   -9999.000000   -9999.000000       0.091300   -9999.000000
57889     57889     hunan          113.9497       26.0797          136       176     2012      08        31        244              0.267500      24.633789       1.520155       0.283544       0.250000       0.260700       0.091100       0.494000
57889     57889     hunan          113.9497       26.0797          136       176     2012      09        01        245              0.266500      24.674774       0.000000       0.280465       0.195500   -9999.000000   -9999.000000       0.667000
57889     57889     hunan          113.9497       26.0797          136       176     2012      09        02        246              0.273292      24.710297      14.761333       0.276443       0.210000       0.064100   -9999.000000   -9999.000000
57889     57889     hunan          113.9497       26.0797          136       176     2012      09        03        247              0.276417      24.508698      20.347633       0.300866       0.260000       0.099400   -9999.000000       0.635000
57889     57889     hunan          113.9497       26.0797          136       176     2012      09        04        248              0.273208      22.618408       0.241414       0.311996   -9999.000000   -9999.000000       0.059600   -9999.000000
57889     57889     hunan          113.9497       26.0797          136       176     2012      09        05        249              0.271583      21.487152       0.171718       0.287779   -9999.000000       0.114000       0.059600       0.517000
57889     57889     hunan          113.9497       26.0797          136       176     2012      09        06        250              0.270542      21.731323       0.665886       0.281101       0.209000   -9999.000000       0.058000       0.683000
57889     57889     hunan          113.9497       26.0797          136       176     2012      09        07        251              0.269958      23.620636       7.254001       0.278266       0.223000       0.091200   -9999.000000       0.795000
57889     57889     hunan          113.9497       26.0797          136       176     2012      09        08        252              0.269292      23.588013       0.340807       0.291110       0.214000   -9999.000000   -9999.000000       0.548000
57889     57889     hunan          113.9497       26.0797          136       176     2012      09        09        253              0.267750      24.255676       5.515385       0.280787   -9999.000000   -9999.000000       0.058000   -9999.000000
57889     57889     hunan          113.9497       26.0797          136       176     2012      09        10        254              0.267083      25.047028      12.689966       0.281694   -9999.000000   -9999.000000       0.124000       0.540000
57889     57889     hunan          113.9497       26.0797          136       176     2012      09        11        255              0.267000      23.643097      13.446456       0.303374       0.163000   -9999.000000       0.123600   -9999.000000
57889     57889     hunan          113.9497       26.0797          136       176     2012      09        12        256              0.266542      23.613922       7.816059       0.305843       0.140000   -9999.000000   -9999.000000       0.695000
57889     57889     hunan          113.9497       26.0797          136       176     2012      09        13        257              0.266000      23.838470       1.007408       0.297226       0.203000       0.076000   -9999.000000       0.752000
57889     57889     hunan          113.9497       26.0797          136       176     2012      09        14        258              0.265250      20.020264       0.078144       0.290227       0.195000   -9999.000000   -9999.000000   -9999.000000
57889     57889     hunan          113.9497       26.0797          136       176     2012      09        15        259              0.264375      18.048096       0.599975       0.282335   -9999.000000       0.133300       0.121200       0.358000
57889     57889     hunan          113.9497       26.0797          136       176     2012      09        16        260              0.263500      18.768250       0.000000       0.277949       0.179000   -9999.000000       0.124400   -9999.000000
57889     57889     hunan          113.9497       26.0797          136       176     2012      09        17        261              0.262708      19.473175       0.000000       0.275523       0.183000   -9999.000000       0.105700       0.392000
57889     57889     hunan          113.9497       26.0797          136       176     2012      09        18        262              0.262000      18.787750       0.000000       0.274925       0.173000       0.179000   -9999.000000       0.477000
57889     57889     hunan          113.9497       26.0797          136       176     2012      09        19        263              0.261542      19.532043       0.000000       0.273504       0.179000   -9999.000000   -9999.000000   -9999.000000
57889     57889     hunan          113.9497       26.0797          136       176     2012      09        20        264              0.261458      20.008240      12.673944       0.272547   -9999.000000       0.034700   -9999.000000       0.655000
57889     57889     hunan          113.9497       26.0797          136       176     2012      09        21        265              0.267708      19.297821       0.871776       0.287943   -9999.000000       0.053200       0.107100   -9999.000000
57889     57889     hunan          113.9497       26.0797          136       176     2012      09        22        266              0.266625      20.651215       1.143130       0.293003       0.200500   -9999.000000       0.113300       0.821000
57889     57889     hunan          113.9497       26.0797          136       176     2012      09        23        267              0.269333      21.433167       3.823628       0.282936       0.194000   -9999.000000       0.114000       0.752000
57889     57889     hunan          113.9497       26.0797          136       176     2012      09        24        268              0.269625      21.279053       5.003813       0.285106       0.213000   -9999.000000   -9999.000000       0.660000
57889     57889     hunan          113.9497       26.0797          136       176     2012      09        25        269              0.268667      20.260651       0.834624       0.290885   -9999.000000       0.076700   -9999.000000       0.784000
57889     57889     hunan          113.9497       26.0797          136       176     2012      09        26        270              0.267625      20.866852       0.854859       0.281368   -9999.000000       0.110300       0.173000   -9999.000000
57889     57889     hunan          113.9497       26.0797          136       176     2012      09        27        271              0.267000      20.416107       0.000000       0.279664       0.173000   -9999.000000       0.169600       0.446000
57889     57889     hunan          113.9497       26.0797          136       176     2012      09        28        272              0.265800      20.340240       0.000000       0.273948       0.170500   -9999.000000       0.169100   -9999.000000
57889     57889     hunan          113.9497       26.0797          136       176     2012      09        29        273              0.264750      19.222900       0.000000       0.272089       0.167000   -9999.000000   -9999.000000       0.328000
57889     57889     hunan          113.9497       26.0797          136       176     2012      09        30        274              0.263708      18.735565       0.499215       0.268885       0.170000   -9999.000000   -9999.000000       0.520000
57889     57889     hunan          113.9497       26.0797          136       176     2012      10        01        275              0.262708      17.937927       0.472469       0.267293   -9999.000000   -9999.000000   -9999.000000   -9999.000000
57889     57889     hunan          113.9497       26.0797          136       176     2012      10        02        276              0.261750      18.008545       0.000000       0.264952   -9999.000000   -9999.000000       0.155700       0.415000
57889     57889     hunan          113.9497       26.0797          136       176     2012      10        03        277              0.261167      18.151245       0.000000       0.263077       0.186500       0.138000       0.160400   -9999.000000
57889     57889     hunan          113.9497       26.0797          136       176     2012      10        04        278              0.260500      19.038269       0.000000       0.261872       0.199500   -9999.000000       0.160700       0.387000
57889     57889     hunan          113.9497       26.0797          136       176     2012      10        05        279              0.259958      18.641418       0.000000       0.260777       0.204500   -9999.000000   -9999.000000       0.581000
57889     57889     hunan          113.9497       26.0797          136       176     2012      10        06        280              0.259250      19.634125       0.445972       0.259013   -9999.000000       0.060500   -9999.000000       0.360000
57889     57889     hunan          113.9497       26.0797          136       176     2012      10        07        281              0.258958      18.019897       0.000000       0.258313   -9999.000000   -9999.000000   -9999.000000       0.324000
57889     57889     hunan          113.9497       26.0797          136       176     2012      10        08        282              0.258333      19.002228       0.000000       0.256924       0.187000       0.075600       0.145200   -9999.000000
57889     57889     hunan          113.9497       26.0797          136       176     2012      10        09        283              0.257917      19.460388       0.462658       0.255076       0.187000   -9999.000000       0.145100       0.327000
57889     57889     hunan          113.9497       26.0797          136       176     2012      10        10        284              0.257375      18.107635       0.000000       0.255805       0.195000   -9999.000000       0.145100   -9999.000000
57889     57889     hunan          113.9497       26.0797          136       176     2012      10        11        285              0.256667      18.089325       0.000000       0.252867       0.199000       0.039300   -9999.000000       0.274000
57889     57889     hunan          113.9497       26.0797          136       176     2012      10        12        286              0.256125      18.189423       0.000000       0.250432   -9999.000000   -9999.000000   -9999.000000       0.502000
57889     57889     hunan          113.9497       26.0797          136       176     2012      10        13        287              0.255667      18.704163       0.000000       0.248525   -9999.000000       0.095000       0.146200   -9999.000000
57889     57889     hunan          113.9497       26.0797          136       176     2012      10        14        288              0.255292      19.413177       1.676719       0.246799       0.209000   -9999.000000       0.145500       0.356000
57889     57889     hunan          113.9497       26.0797          136       176     2012      10        15        289              0.255000      19.730530       0.000000       0.251731       0.193500   -9999.000000       0.178700   -9999.000000
57889     57889     hunan          113.9497       26.0797          136       176     2012      10        16        290              0.254708      20.719116       2.697164       0.247227       0.205000       0.148300   -9999.000000       0.427000
57889     57889     hunan          113.9497       26.0797          136       176     2012      10        17        291              0.254000      21.063232       0.540224       0.251650   -9999.000000   -9999.000000   -9999.000000       0.571000
57889     57889     hunan          113.9497       26.0797          136       176     2012      10        18        292              0.253542      17.493286       0.000000       0.255428   -9999.000000   -9999.000000   -9999.000000   -9999.000000
57889     57889     hunan          113.9497       26.0797          136       176     2012      10        19        293              0.253000      17.285065       0.000000       0.249155       0.201000       0.081500       0.175700       0.340000
57889     57889     hunan          113.9497       26.0797          136       176     2012      10        20        294              0.253000      18.805359       0.000000       0.247569       0.177000   -9999.000000       0.183200   -9999.000000
57889     57889     hunan          113.9497       26.0797          136       176     2012      10        21        295              0.252500      20.131744       0.000000       0.246150       0.195500       0.060900       0.174200       0.318000
57889     57889     hunan          113.9497       26.0797          136       176     2012      10        22        296              0.252000      20.520721       0.742102       0.243918   -9999.000000   -9999.000000   -9999.000000       0.374000
57889     57889     hunan          113.9497       26.0797          136       176     2012      10        23        297              0.251542      20.248657       0.080564       0.243394   -9999.000000   -9999.000000   -9999.000000       0.193000
57889     57889     hunan          113.9497       26.0797          136       176     2012      10        24        298              0.251000      17.648468       0.634902       0.245504   -9999.000000       0.153200   -9999.000000       0.488000
57889     57889     hunan          113.9497       26.0797          136       176     2012      10        25        299              0.000000      19.073639       0.000000       0.244446       0.201500   -9999.000000       0.152000   -9999.000000
57889     57889     hunan          113.9497       26.0797          136       176     2012      10        26        300              0.250417      19.533936       0.000000       0.242972       0.192000       0.179100       0.153600       0.338000
57889     57889     hunan          113.9497       26.0797          136       176     2012      10        27        301              0.250417      19.937469       5.674954       0.241653       0.235000   -9999.000000       0.152800   -9999.000000
57889     57889     hunan          113.9497       26.0797          136       176     2012      10        28        302              0.000000      19.661987       0.820848       0.253485   -9999.000000   -9999.000000   -9999.000000       0.494000
57889     57889     hunan          113.9497       26.0797          136       176     2012      10        29        303              0.256250      18.786438      21.794191       0.265326   -9999.000000   -9999.000000   -9999.000000       0.681000
57889     57889     hunan          113.9497       26.0797          136       176     2012      10        30        304              0.267000      19.137268       1.964985       0.290925       0.247500   -9999.000000       0.196200   -9999.000000
57889     57889     hunan          113.9497       26.0797          136       176     2012      10        31        305              0.263833      16.210510       0.000000       0.292129       0.222500       0.072900       0.199900       0.240000
57889     57889     hunan          113.9497       26.0797          136       176     2012      11        01        306              0.261583      14.896179       0.000000       0.274263       0.276000   -9999.000000       0.195000   -9999.000000
57889     57889     hunan          113.9497       26.0797          136       176     2012      11        02        307              0.259833      13.694519       0.000000       0.267935   -9999.000000   -9999.000000   -9999.000000       0.182000
57889     57889     hunan          113.9497       26.0797          136       176     2012      11        03        308              0.259875      14.798065       1.931192       0.263069   -9999.000000       0.421300   -9999.000000       0.494000
57889     57889     hunan          113.9497       26.0797          136       176     2012      11        04        309              0.259833      15.237976       0.000000       0.266274       0.272000   -9999.000000   -9999.000000       0.341000
57889     57889     hunan          113.9497       26.0797          136       176     2012      11        05        310              0.258750      14.634521       0.000000       0.261107       0.254000       0.137900       0.145600       0.472000
57889     57889     hunan          113.9497       26.0797          136       176     2012      11        06        311              0.258000      14.352905       2.330156       0.257301       0.282500       0.150500       0.145500   -9999.000000
57889     57889     hunan          113.9497       26.0797          136       176     2012      11        07        312              0.274000      13.539032      44.354099       0.259160       0.375000   -9999.000000       0.135000       0.625000
57889     57889     hunan          113.9497       26.0797          136       176     2012      11        08        313              0.276810      12.815247      37.966236       0.331039   -9999.000000       0.179500   -9999.000000   -9999.000000
57889     57889     hunan          113.9497       26.0797          136       176     2012      11        09        314              0.274125      13.329315       6.410236       0.328795   -9999.000000   -9999.000000   -9999.000000       0.632000
57889     57889     hunan          113.9497       26.0797          136       176     2012      11        10        315              0.275917      14.544586      26.818506       0.309746       0.333000   -9999.000000       0.163500       0.673000
57889     57889     hunan          113.9497       26.0797          136       176     2012      11        11        316              0.271292      13.434784       0.164241       0.321046       0.254000   -9999.000000       0.153400   -9999.000000
57889     57889     hunan          113.9497       26.0797          136       176     2012      11        12        317              0.269792      11.393341       0.000000       0.292136       0.239500   -9999.000000       0.193400       0.360000
57889     57889     hunan          113.9497       26.0797          136       176     2012      11        13        318              0.000000      12.269867       0.000000       0.286024   -9999.000000       0.018000   -9999.000000   -9999.000000
57889     57889     hunan          113.9497       26.0797          136       176     2012      11        14        319              0.268000      13.802948       0.315951       0.282786   -9999.000000       0.099100   -9999.000000       0.541000
57889     57889     hunan          113.9497       26.0797          136       176     2012      11        15        320              0.267292      13.974884       0.000000       0.282663       0.243500   -9999.000000   -9999.000000       0.493000
57889     57889     hunan          113.9497       26.0797          136       176     2012      11        16        321              0.272375      15.889252      20.782499       0.281059       0.265000   -9999.000000       0.194500   -9999.000000
57889     57889     hunan          113.9497       26.0797          136       176     2012      11        17        322              0.000000      12.730225       0.000000       0.310824       0.258000   -9999.000000       0.194200       0.250000
57889     57889     hunan          113.9497       26.0797          136       176     2012      11        18        323              0.269958      11.242493       0.000000       0.292317   -9999.000000   -9999.000000       0.189900   -9999.000000
57889     57889     hunan          113.9497       26.0797          136       176     2012      11        19        324              0.268750      11.573181       0.919316       0.284497   -9999.000000       0.059300   -9999.000000       0.410000
57889     57889     hunan          113.9497       26.0797          136       176     2012      11        20        325              0.268042      13.093567       6.482099       0.282896       0.258000   -9999.000000   -9999.000000       0.350000
57889     57889     hunan          113.9497       26.0797          136       176     2012      11        21        326              0.270000      14.560394      10.069332       0.288417       0.230500   -9999.000000   -9999.000000       0.503000
57889     57889     hunan          113.9497       26.0797          136       176     2012      11        22        327              0.275542      15.201660      17.079826       0.300002       0.221500   -9999.000000       0.114000       0.662000
57889     57889     hunan          113.9497       26.0797          136       176     2012      11        23        328              0.272375      14.029388       1.817090       0.315809       0.233000       0.066000       0.113100   -9999.000000
57889     57889     hunan          113.9497       26.0797          136       176     2012      11        24        329              0.270708      11.123291       0.609747       0.298151   -9999.000000   -9999.000000       0.109000       0.458000
57889     57889     hunan          113.9497       26.0797          136       176     2012      11        25        330              0.277417      12.562500      65.376434       0.292338   -9999.000000   -9999.000000   -9999.000000   -9999.000000
57889     57889     hunan          113.9497       26.0797          136       176     2012      11        26        331              0.273167      13.438110       0.150868       0.344203       0.235000   -9999.000000   -9999.000000       0.331000
57889     57889     hunan          113.9497       26.0797          136       176     2012      11        27        332              0.270083       9.517273       2.051749       0.332759       0.222000   -9999.000000       0.093600       0.559000
57889     57889     hunan          113.9497       26.0797          136       176     2012      11        28        333              0.270917      10.897858       4.423055       0.313244       0.223000   -9999.000000       0.085900   -9999.000000
57889     57889     hunan          113.9497       26.0797          136       176     2012      11        29        334              0.271833      10.862335      16.684423       0.309924   -9999.000000       0.041300       0.091500       0.585000
57889     57889     hunan          113.9497       26.0797          136       176     2012      11        30        335              0.274083      11.091187      10.496627       0.314466   -9999.000000   -9999.000000   -9999.000000   -9999.000000
57889     57889     hunan          113.9497       26.0797          136       176     2012      12        01        336              0.275917      10.218536      21.973701       0.315859       0.263000       0.042700   -9999.000000       0.580000
57889     57889     hunan          113.9497       26.0797          136       176     2012      12        02        337              0.272125       9.895203       0.135950       0.328676       0.266000   -9999.000000   -9999.000000       0.569000
57889     57889     hunan          113.9497       26.0797          136       176     2012      12        03        338              0.270542       9.259644       0.148472       0.311920       0.273000   -9999.000000       0.120900       0.346000
57889     57889     hunan          113.9497       26.0797          136       176     2012      12        04        339              0.269542       8.538239       0.192943       0.302375       0.267000   -9999.000000       0.117700       0.383000
57889     57889     hunan          113.9497       26.0797          136       176     2012      12        05        340              0.268667       8.719696       0.000000       0.298456   -9999.000000   -9999.000000       0.113600   -9999.000000
57889     57889     hunan          113.9497       26.0797          136       176     2012      12        06        341              0.267917       8.801758       0.000000       0.294482   -9999.000000   -9999.000000   -9999.000000       0.264000
57889     57889     hunan          113.9497       26.0797          136       176     2012      12        07        342              0.267000       9.013611       0.000000       0.290623       0.238500   -9999.000000   -9999.000000   -9999.000000
57889     57889     hunan          113.9497       26.0797          136       176     2012      12        08        343              0.266708      10.072784       0.000000       0.286948       0.244000   -9999.000000   -9999.000000       0.195000
57889     57889     hunan          113.9497       26.0797          136       176     2012      12        09        344              0.266000       9.966187       0.252250       0.283411       0.251500       0.143200       0.120600       0.216000
57889     57889     hunan          113.9497       26.0797          136       176     2012      12        10        345              0.267458       9.624847      12.754625       0.281703   -9999.000000   -9999.000000       0.109700   -9999.000000
57889     57889     hunan          113.9497       26.0797          136       176     2012      12        11        346              0.269208       7.610474       0.000000       0.303692   -9999.000000   -9999.000000       0.105500       0.298000
57889     57889     hunan          113.9497       26.0797          136       176     2012      12        12        347              0.268000       6.455933       0.000000       0.289957       0.304000   -9999.000000   -9999.000000   -9999.000000
57889     57889     hunan          113.9497       26.0797          136       176     2012      12        13        348              0.267583       8.200256       1.405967       0.284202       0.247500   -9999.000000   -9999.000000       0.329000
57889     57889     hunan          113.9497       26.0797          136       176     2012      12        14        349              0.267000      11.256348       1.233259       0.282373       0.265500       0.027400       0.100600       0.438000
57889     57889     hunan          113.9497       26.0797          136       176     2012      12        15        350              0.000000      13.764160       0.118128       0.281356   -9999.000000   -9999.000000       0.103100   -9999.000000
57889     57889     hunan          113.9497       26.0797          136       176     2012      12        16        351              0.265958      13.640717       0.428659       0.280322   -9999.000000   -9999.000000       0.102300       0.163000
57889     57889     hunan          113.9497       26.0797          136       176     2012      12        17        352              0.266000      11.920258       7.269581       0.281004       0.323000   -9999.000000   -9999.000000   -9999.000000
57889     57889     hunan          113.9497       26.0797          136       176     2012      12        18        353              0.267958       9.637177       1.447884       0.291519       0.336000   -9999.000000   -9999.000000       0.175000
57889     57889     hunan          113.9497       26.0797          136       176     2012      12        19        354              0.267542       6.101959       3.567222       0.290386       0.327500   -9999.000000   -9999.000000       0.181000
57889     57889     hunan          113.9497       26.0797          136       176     2012      12        20        355              0.000000       7.241028      13.279994       0.285658       0.358000   -9999.000000       0.079000       0.459000
57889     57889     hunan          113.9497       26.0797          136       176     2012      12        21        356              0.274625       8.609009       9.419234       0.304296   -9999.000000   -9999.000000       0.080600       0.591000
57889     57889     hunan          113.9497       26.0797          136       176     2012      12        22        357              0.271833       6.864227       0.446820       0.306783   -9999.000000       0.047200       0.074500   -9999.000000
57889     57889     hunan          113.9497       26.0797          136       176     2012      12        23        358              0.270208       4.334625       0.000000       0.291292   -9999.000000   -9999.000000   -9999.000000       0.049000
57889     57889     hunan          113.9497       26.0797          136       176     2012      12        24        359              0.269056       2.995728       0.263128       0.285042       0.227000   -9999.000000   -9999.000000   -9999.000000
57889     57889     hunan          113.9497       26.0797          136       176     2012      12        25        360              0.268833       5.507080       0.000000       0.282588       0.214500       0.027200       0.120800       0.217000
57889     57889     hunan          113.9497       26.0797          136       176     2012      12        26        361              0.000000       6.842987      33.830006       0.281417   -9999.000000   -9999.000000       0.104000       0.258000
57889     57889     hunan          113.9497       26.0797          136       176     2012      12        27        362              0.279917       6.795410      38.543484       0.299763   -9999.000000       0.108200       0.120500   -9999.000000
57889     57889     hunan          113.9497       26.0797          136       176     2012      12        28        363              0.273000       6.149658       4.534608       0.334011       0.235000   -9999.000000   -9999.000000       0.381000
57889     57889     hunan          113.9497       26.0797          136       176     2012      12        29        364              0.000000       8.478302      13.723700       0.319840   -9999.000000   -9999.000000   -9999.000000   -9999.000000
57889     57889     hunan          113.9497       26.0797          136       176     2012      12        30        365              0.000000       3.937561       6.460205       0.323219   -9999.000000   -9999.000000   -9999.000000       0.058000
57889     57889     hunan          113.9497       26.0797          136       176     2012      12        31        366              0.271267       2.416748       1.905955       0.311818   -9999.000000   -9999.000000       0.120700       0.066000
