# Supplementary material for: Research on Fusing Multisatellite Soil Moisture Data Based on Bayesian Model Averaging
Source: Hindawi journal article supplement (doi:10.1155/2018/9310838), 2018-06-25
Supplement: f1 [file 9310838.f1.zip › 2012_sm00-10cm_daily_ZDB_ZHY_57906_366days_allin.txt]

57906     57906     guizhou        106.0894       25.1750          139       144     2012      01        01        001              0.000000   -9999.000000       0.798233   -9999.000000       0.129500       0.316500   -9999.000000   -9999.000000
57906     57906     guizhou        106.0894       25.1750          139       144     2012      01        02        002              0.247000       9.835358       4.363412       0.250286   -9999.000000       0.079100   -9999.000000       0.232000
57906     57906     guizhou        106.0894       25.1750          139       144     2012      01        03        003              0.000000       9.884644       2.634045       0.266680   -9999.000000   -9999.000000       0.049300       0.104000
57906     57906     guizhou        106.0894       25.1750          139       144     2012      01        04        004              0.289304       8.526001       5.833751       0.270321       0.143000       0.156900       0.045000       0.075000
57906     57906     guizhou        106.0894       25.1750          139       144     2012      01        05        005              0.304250       7.207367       1.624747       0.278498       0.136000   -9999.000000       0.046100   -9999.000000
57906     57906     guizhou        106.0894       25.1750          139       144     2012      01        06        006              0.305000       6.864685       0.549707       0.270311       0.137000       0.065400   -9999.000000       0.251000
57906     57906     guizhou        106.0894       25.1750          139       144     2012      01        07        007              0.305875       7.651825       1.603089       0.267358   -9999.000000   -9999.000000   -9999.000000   -9999.000000
57906     57906     guizhou        106.0894       25.1750          139       144     2012      01        08        008              0.000000       8.053223       0.304767       0.267055   -9999.000000   -9999.000000   -9999.000000       0.278000
57906     57906     guizhou        106.0894       25.1750          139       144     2012      01        09        009              0.308000       8.020020       0.362855       0.265066       0.137000   -9999.000000   -9999.000000       0.218000
57906     57906     guizhou        106.0894       25.1750          139       144     2012      01        10        010              0.308000       8.935516       1.131785       0.262946       0.137500   -9999.000000       0.055200   -9999.000000
57906     57906     guizhou        106.0894       25.1750          139       144     2012      01        11        011              0.305000       8.977570       0.000000       0.262759       0.099500   -9999.000000       0.048500       0.172000
57906     57906     guizhou        106.0894       25.1750          139       144     2012      01        12        012              0.303174       9.802673       0.000000       0.260612       0.087000       0.236900   -9999.000000   -9999.000000
57906     57906     guizhou        106.0894       25.1750          139       144     2012      01        13        013              0.298750      12.168060       0.232807       0.257638   -9999.000000   -9999.000000   -9999.000000       0.316000
57906     57906     guizhou        106.0894       25.1750          139       144     2012      01        14        014              0.358000      13.316772       6.624506       0.256995   -9999.000000       0.416700   -9999.000000       0.325000
57906     57906     guizhou        106.0894       25.1750          139       144     2012      01        15        015              0.388250      11.194122       0.524436       0.275249       0.098500       0.135700       0.052300       0.276000
57906     57906     guizhou        106.0894       25.1750          139       144     2012      01        16        016              0.385091      10.213623       0.534162       0.270267       0.091000   -9999.000000       0.065500       0.376000
57906     57906     guizhou        106.0894       25.1750          139       144     2012      01        17        017              0.000000      12.484222       3.218110       0.262865       0.097500       0.339900       0.062100   -9999.000000
57906     57906     guizhou        106.0894       25.1750          139       144     2012      01        18        018              0.393000      10.437256       0.811088       0.271019   -9999.000000   -9999.000000   -9999.000000       0.447000
57906     57906     guizhou        106.0894       25.1750          139       144     2012      01        19        019              0.392000      10.394745       0.878121       0.267290   -9999.000000       0.133500   -9999.000000       0.372000
57906     57906     guizhou        106.0894       25.1750          139       144     2012      01        20        020              0.392250      10.574768       2.305812       0.265977       0.099000       0.186100       0.068600       0.527000
57906     57906     guizhou        106.0894       25.1750          139       144     2012      01        21        021              0.393957      10.483063       0.839740       0.268075       0.104000   -9999.000000       0.065800       0.379000
57906     57906     guizhou        106.0894       25.1750          139       144     2012      01        22        022              0.389500       9.040985       0.000000       0.267912       0.106500       0.306700       0.056900   -9999.000000
57906     57906     guizhou        106.0894       25.1750          139       144     2012      01        23        023              0.385625       7.755554       0.000000       0.262631   -9999.000000   -9999.000000   -9999.000000       0.305000
57906     57906     guizhou        106.0894       25.1750          139       144     2012      01        24        024              0.382500       7.542938       0.358949       0.259785   -9999.000000       0.414700   -9999.000000   -9999.000000
57906     57906     guizhou        106.0894       25.1750          139       144     2012      01        25        025              0.379348       7.749329       0.203382       0.258019       0.110500       0.298000   -9999.000000       0.179000
57906     57906     guizhou        106.0894       25.1750          139       144     2012      01        26        026              0.377000       8.118530       0.546283       0.256440       0.104000   -9999.000000       0.046600       0.214000
57906     57906     guizhou        106.0894       25.1750          139       144     2012      01        27        027              0.377000       7.077362       0.184058       0.258509       0.103000       0.231600       0.050400   -9999.000000
57906     57906     guizhou        106.0894       25.1750          139       144     2012      01        28        028              0.374292       8.141449       0.000000       0.257116   -9999.000000   -9999.000000       0.039500       0.238000
57906     57906     guizhou        106.0894       25.1750          139       144     2012      01        29        029              0.372000       9.913361       0.336378       0.255577   -9999.000000   -9999.000000   -9999.000000   -9999.000000
57906     57906     guizhou        106.0894       25.1750          139       144     2012      01        30        030              0.370500       8.670746       0.307246       0.256446       0.109000       0.091400   -9999.000000       0.306000
57906     57906     guizhou        106.0894       25.1750          139       144     2012      01        31        031              0.369000       9.352448       0.205890       0.255275       0.111500   -9999.000000   -9999.000000       0.234000
57906     57906     guizhou        106.0894       25.1750          139       144     2012      02        01        032              0.369000       9.048035       0.206110       0.254643       0.102000       0.102200       0.050400       0.512000
57906     57906     guizhou        106.0894       25.1750          139       144     2012      02        02        033              0.369000       9.687958       1.754486       0.254776       0.105000       0.112000       0.052500       0.405000
57906     57906     guizhou        106.0894       25.1750          139       144     2012      02        03        034              0.369000       9.400848       0.216550       0.261073   -9999.000000   -9999.000000       0.043900   -9999.000000
57906     57906     guizhou        106.0894       25.1750          139       144     2012      02        04        035              0.369000      11.184509       0.166516       0.256650   -9999.000000       0.368400   -9999.000000       0.291000
57906     57906     guizhou        106.0894       25.1750          139       144     2012      02        05        036              0.369000      12.140381       0.402840       0.255256       0.099500   -9999.000000   -9999.000000   -9999.000000
57906     57906     guizhou        106.0894       25.1750          139       144     2012      02        06        037              0.366824      15.425201       0.000000       0.253462       0.098000       0.044600       0.042700       0.293000
57906     57906     guizhou        106.0894       25.1750          139       144     2012      02        07        038              0.354750      14.568726       0.000000       0.250814       0.103000       0.287000       0.044200       0.311000
57906     57906     guizhou        106.0894       25.1750          139       144     2012      02        08        039              0.342583      13.733398       0.116194       0.248295   -9999.000000   -9999.000000       0.038400   -9999.000000
57906     57906     guizhou        106.0894       25.1750          139       144     2012      02        09        040              0.336087       9.731598       0.348639       0.249515   -9999.000000       0.097100   -9999.000000       0.200000
57906     57906     guizhou        106.0894       25.1750          139       144     2012      02        10        041              0.333500       9.566681       0.000000       0.251335       0.109000   -9999.000000   -9999.000000   -9999.000000
57906     57906     guizhou        106.0894       25.1750          139       144     2012      02        11        042              0.327739       8.914642       0.157448       0.250848       0.124000       0.185100   -9999.000000       0.235000
57906     57906     guizhou        106.0894       25.1750          139       144     2012      02        12        043              0.327833       9.108612       0.670267       0.250601       0.117000   -9999.000000       0.036500       0.279000
57906     57906     guizhou        106.0894       25.1750          139       144     2012      02        13        044              0.327667      12.628998       0.275401       0.249817   -9999.000000   -9999.000000       0.046900       0.212000
57906     57906     guizhou        106.0894       25.1750          139       144     2012      02        14        045              0.325522      17.665710       0.000000       0.247701   -9999.000000       0.335700   -9999.000000       0.166000
57906     57906     guizhou        106.0894       25.1750          139       144     2012      02        15        046              0.320261      16.706207       0.807046       0.245469       0.117000   -9999.000000   -9999.000000   -9999.000000
57906     57906     guizhou        106.0894       25.1750          139       144     2012      02        16        047              0.317250      12.139984       0.663278       0.246012       0.119500       0.094600   -9999.000000       0.170000
57906     57906     guizhou        106.0894       25.1750          139       144     2012      02        17        048              0.315000      12.119385       0.351437       0.246481       0.120000       0.028300   -9999.000000       0.077000
57906     57906     guizhou        106.0894       25.1750          139       144     2012      02        18        049              0.000000       9.695343       0.000000       0.248024       0.119000   -9999.000000       0.053600       0.013000
57906     57906     guizhou        106.0894       25.1750          139       144     2012      02        19        050              0.302800       8.985657       0.271784       0.247580   -9999.000000       0.217400       0.056900       0.175000
57906     57906     guizhou        106.0894       25.1750          139       144     2012      02        20        051              0.299565       9.952454       0.322025       0.247781       0.121000   -9999.000000       0.048000   -9999.000000
57906     57906     guizhou        106.0894       25.1750          139       144     2012      02        21        052              0.299391      12.063141       0.261419       0.249270       0.077500   -9999.000000   -9999.000000       0.375000
57906     57906     guizhou        106.0894       25.1750          139       144     2012      02        22        053              0.296667      15.471436       0.000000       0.249516       0.073500       0.261000   -9999.000000   -9999.000000
57906     57906     guizhou        106.0894       25.1750          139       144     2012      02        23        054              0.000000      18.442047       0.953912       0.244383       0.073500   -9999.000000       0.052400       0.109000
57906     57906     guizhou        106.0894       25.1750          139       144     2012      02        24        055              0.276824      15.580688       0.760705       0.243534   -9999.000000       0.400300       0.052900       0.084000
57906     57906     guizhou        106.0894       25.1750          139       144     2012      02        25        056              0.273727      15.738312       0.244808       0.243915   -9999.000000       0.160400       0.050000   -9999.000000
57906     57906     guizhou        106.0894       25.1750          139       144     2012      02        26        057              0.266957      13.406006       0.135480       0.243701       0.086000   -9999.000000   -9999.000000       0.099000
57906     57906     guizhou        106.0894       25.1750          139       144     2012      02        27        058              0.261957      10.476044       0.330967       0.243704       0.082000       0.380800   -9999.000000   -9999.000000
57906     57906     guizhou        106.0894       25.1750          139       144     2012      02        28        059              0.259333      10.365723       0.514163       0.243282       0.081500   -9999.000000   -9999.000000       0.113000
57906     57906     guizhou        106.0894       25.1750          139       144     2012      02        29        060              0.000000   -9999.000000       0.078680   -9999.000000   -9999.000000       0.058400   -9999.000000   -9999.000000
57906     57906     guizhou        106.0894       25.1750          139       144     2012      03        01        061              0.254208      10.321442       0.083433       0.243994   -9999.000000       0.145000       0.060800       0.171000
57906     57906     guizhou        106.0894       25.1750          139       144     2012      03        02        062              0.250609      15.541626       0.103306       0.241957       0.114000   -9999.000000       0.053800       0.025000
57906     57906     guizhou        106.0894       25.1750          139       144     2012      03        03        063              0.251000      14.372192       1.557044       0.242086       0.106500   -9999.000000   -9999.000000   -9999.000000
57906     57906     guizhou        106.0894       25.1750          139       144     2012      03        04        064              0.255167      15.142822       1.831195       0.247949       0.105500   -9999.000000   -9999.000000       0.322000
57906     57906     guizhou        106.0894       25.1750          139       144     2012      03        05        065              0.255125      15.647736       0.000000       0.256242   -9999.000000       0.049400   -9999.000000   -9999.000000
57906     57906     guizhou        106.0894       25.1750          139       144     2012      03        06        066              0.248348      19.780457       0.000000       0.243394   -9999.000000       0.130000       0.061100       0.022000
57906     57906     guizhou        106.0894       25.1750          139       144     2012      03        07        067              0.000000      19.345337       0.571236       0.238639       0.125000   -9999.000000       0.065700       0.137000
57906     57906     guizhou        106.0894       25.1750          139       144     2012      03        08        068              0.237000      15.969177       0.296111       0.237665       0.116000       0.168900   -9999.000000   -9999.000000
57906     57906     guizhou        106.0894       25.1750          139       144     2012      03        09        069              0.236913      12.905334       1.465342       0.241283       0.116500       0.148900   -9999.000000       0.074000
57906     57906     guizhou        106.0894       25.1750          139       144     2012      03        10        070              0.235136      13.093018       0.000000       0.240055       0.109000   -9999.000000   -9999.000000   -9999.000000
57906     57906     guizhou        106.0894       25.1750          139       144     2012      03        11        071              0.232250      14.495331       0.000000       0.238295   -9999.000000       0.203100       0.061500       0.143000
57906     57906     guizhou        106.0894       25.1750          139       144     2012      03        12        072              0.229043      14.693542       1.003358       0.237815   -9999.000000   -9999.000000       0.066200       0.153000
57906     57906     guizhou        106.0894       25.1750          139       144     2012      03        13        073              0.227913      12.949921       0.201228       0.242595       0.123500       0.323000       0.061100       0.096000
57906     57906     guizhou        106.0894       25.1750          139       144     2012      03        14        074              0.228000      14.067047       0.410527       0.242190       0.111000       0.213000   -9999.000000       0.113000
57906     57906     guizhou        106.0894       25.1750          139       144     2012      03        15        075              0.226292      15.270905       0.000000       0.241299       0.101500   -9999.000000   -9999.000000   -9999.000000
57906     57906     guizhou        106.0894       25.1750          139       144     2012      03        16        076              0.217708      21.996765       0.240203       0.234672   -9999.000000       0.230100   -9999.000000       0.266000
57906     57906     guizhou        106.0894       25.1750          139       144     2012      03        17        077              0.210625      24.163422       0.000000       0.228715   -9999.000000   -9999.000000       0.058200       0.116000
57906     57906     guizhou        106.0894       25.1750          139       144     2012      03        18        078              0.205958      25.330231       0.000000       0.222263       0.103000       0.155100       0.060300       0.039000
57906     57906     guizhou        106.0894       25.1750          139       144     2012      03        19        079              0.198792      25.898376       0.000000       0.218139       0.097500       0.184000       0.057700       0.293000
57906     57906     guizhou        106.0894       25.1750          139       144     2012      03        20        080              0.192417      27.146149       0.000000       0.210535       0.098000   -9999.000000   -9999.000000   -9999.000000
57906     57906     guizhou        106.0894       25.1750          139       144     2012      03        21        081              0.194105      28.725800       0.000000       0.205157   -9999.000000       0.262800   -9999.000000       0.284000
57906     57906     guizhou        106.0894       25.1750          139       144     2012      03        22        082              0.190042      27.780792       2.475607       0.202903   -9999.000000   -9999.000000       0.070100   -9999.000000
57906     57906     guizhou        106.0894       25.1750          139       144     2012      03        23        083              0.188826      27.220703       0.346317       0.206584       0.109500       0.227600       0.063900       0.081000
57906     57906     guizhou        106.0894       25.1750          139       144     2012      03        24        084              0.184783      17.742432       0.000000       0.217812       0.093500       0.272200       0.057000       0.157000
57906     57906     guizhou        106.0894       25.1750          139       144     2012      03        25        085              0.000000      20.558197       0.343005       0.207168       0.094000   -9999.000000   -9999.000000   -9999.000000
57906     57906     guizhou        106.0894       25.1750          139       144     2012      03        26        086              0.176750      22.784912       0.000000       0.202257       0.086000       0.102900   -9999.000000       0.033000
57906     57906     guizhou        106.0894       25.1750          139       144     2012      03        27        087              0.177087      21.120117       6.402426       0.206003   -9999.000000   -9999.000000   -9999.000000   -9999.000000
57906     57906     guizhou        106.0894       25.1750          139       144     2012      03        28        088              0.185609      22.229095       0.575573       0.220377       0.111000   -9999.000000       0.064100       0.257000
57906     57906     guizhou        106.0894       25.1750          139       144     2012      03        29        089              0.189500      21.149109       2.437678       0.242767       0.114000       0.302100       0.073300       0.331000
57906     57906     guizhou        106.0894       25.1750          139       144     2012      03        30        090              0.186417      21.544830       0.634659       0.240343       0.105500   -9999.000000       0.058200       0.207000
57906     57906     guizhou        106.0894       25.1750          139       144     2012      03        31        091              0.181333      19.964478       0.000000       0.241097       0.095000       0.245300   -9999.000000       0.163000
57906     57906     guizhou        106.0894       25.1750          139       144     2012      04        01        092              0.174917      19.442505       1.196831       0.230451   -9999.000000       0.290600   -9999.000000   -9999.000000
57906     57906     guizhou        106.0894       25.1750          139       144     2012      04        02        093              0.170208      22.979340       0.000000       0.220512   -9999.000000   -9999.000000   -9999.000000       0.071000
57906     57906     guizhou        106.0894       25.1750          139       144     2012      04        03        094              0.169750      26.463257       0.000000       0.211507       0.107000       0.106600       0.059900   -9999.000000
57906     57906     guizhou        106.0894       25.1750          139       144     2012      04        04        095              0.172833      25.857635       7.598192       0.208436       0.109500   -9999.000000       0.065700       0.140000
57906     57906     guizhou        106.0894       25.1750          139       144     2012      04        05        096              0.193292      27.572021       3.475368       0.231682       0.104500       0.162900       0.057000       0.345000
57906     57906     guizhou        106.0894       25.1750          139       144     2012      04        06        097              0.196667      25.861420       0.085829       0.241566   -9999.000000       0.204900   -9999.000000   -9999.000000
57906     57906     guizhou        106.0894       25.1750          139       144     2012      04        07        098              0.193292      22.770660       3.009783       0.236594   -9999.000000   -9999.000000   -9999.000000       0.100000
57906     57906     guizhou        106.0894       25.1750          139       144     2012      04        08        099              0.194792      20.601105       3.474465       0.245377       0.120000       0.184100       0.073600   -9999.000000
57906     57906     guizhou        106.0894       25.1750          139       144     2012      04        09        100              0.210458      20.558350       0.000000       0.244926       0.105000   -9999.000000       0.078300       0.116000
57906     57906     guizhou        106.0894       25.1750          139       144     2012      04        10        101              0.198625      24.323944       0.000000       0.239060       0.100000       0.250900       0.083400       0.331000
57906     57906     guizhou        106.0894       25.1750          139       144     2012      04        11        102              0.177217      26.790955       0.000000       0.226296   -9999.000000       0.256300   -9999.000000       0.231000
57906     57906     guizhou        106.0894       25.1750          139       144     2012      04        12        103              0.165542      29.191376       0.063300       0.213594   -9999.000000   -9999.000000   -9999.000000       0.231000
57906     57906     guizhou        106.0894       25.1750          139       144     2012      04        13        104              0.153833      28.973602       0.000000       0.202394       0.135000       0.292600   -9999.000000   -9999.000000
57906     57906     guizhou        106.0894       25.1750          139       144     2012      04        14        105              0.152042      22.793488       0.000000       0.202649       0.111500   -9999.000000       0.073500       0.226000
57906     57906     guizhou        106.0894       25.1750          139       144     2012      04        15        106              0.152208      24.922272       0.405256       0.201836       0.112000   -9999.000000       0.076100       0.116000
57906     57906     guizhou        106.0894       25.1750          139       144     2012      04        16        107              0.150333      26.922241       0.000000       0.194773       0.110000       0.184800       0.077800       0.049000
57906     57906     guizhou        106.0894       25.1750          139       144     2012      04        17        108              0.148583      27.415924       0.000000       0.186991   -9999.000000   -9999.000000   -9999.000000       0.138000
57906     57906     guizhou        106.0894       25.1750          139       144     2012      04        18        109              0.145125      28.770905       0.000000       0.179171       0.129000       0.381100   -9999.000000   -9999.000000
57906     57906     guizhou        106.0894       25.1750          139       144     2012      04        19        110              0.149625      26.031738      13.512748       0.176797       0.122000       0.036900   -9999.000000       0.417000
57906     57906     guizhou        106.0894       25.1750          139       144     2012      04        20        111              0.156375      26.855804       0.512585       0.253347       0.111000   -9999.000000       0.079800   -9999.000000
57906     57906     guizhou        106.0894       25.1750          139       144     2012      04        21        112              0.152167      27.159454       1.094513       0.233811       0.107500       0.243700       0.085200       0.051000
57906     57906     guizhou        106.0894       25.1750          139       144     2012      04        22        113              0.150250      27.073853       0.447591       0.218544   -9999.000000   -9999.000000   -9999.000000       0.179000
57906     57906     guizhou        106.0894       25.1750          139       144     2012      04        23        114              0.148667      29.082764       0.000000       0.208070   -9999.000000       0.215400   -9999.000000   -9999.000000
57906     57906     guizhou        106.0894       25.1750          139       144     2012      04        24        115              0.149042      31.001617       0.000000       0.192389       0.118500       0.223400   -9999.000000       0.317000
57906     57906     guizhou        106.0894       25.1750          139       144     2012      04        25        116              0.000000      32.672668       0.026562       0.175446       0.130500   -9999.000000       0.102800   -9999.000000
57906     57906     guizhou        106.0894       25.1750          139       144     2012      04        26        117              0.140875      27.755157       0.000000       0.168611       0.114500       0.292000       0.098800       0.087000
57906     57906     guizhou        106.0894       25.1750          139       144     2012      04        27        118              0.140458      28.389282       0.000000       0.161617   -9999.000000   -9999.000000       0.090500       0.040000
57906     57906     guizhou        106.0894       25.1750          139       144     2012      04        28        119              0.141042      30.867188       0.000000       0.155373   -9999.000000       0.225500   -9999.000000       0.004000
57906     57906     guizhou        106.0894       25.1750          139       144     2012      04        29        120              0.140000      33.046600       0.000000       0.149068       0.126500       0.155500   -9999.000000       0.084000
57906     57906     guizhou        106.0894       25.1750          139       144     2012      04        30        121              0.138750      34.191010       0.000000       0.143494       0.110000   -9999.000000   -9999.000000   -9999.000000
57906     57906     guizhou        106.0894       25.1750          139       144     2012      05        01        122              0.136958      35.170929       0.000000       0.136110       0.145500       0.196900       0.102500       0.011000
57906     57906     guizhou        106.0894       25.1750          139       144     2012      05        02        123              0.133542      35.027557       0.000000       0.132922   -9999.000000   -9999.000000       0.113900   -9999.000000
57906     57906     guizhou        106.0894       25.1750          139       144     2012      05        03        124              0.134739      33.223511       3.125641       0.133404   -9999.000000   -9999.000000       0.093800       0.053000
57906     57906     guizhou        106.0894       25.1750          139       144     2012      05        04        125              0.143458      34.865295      10.935703       0.148651   -9999.000000       0.317200   -9999.000000       0.173000
57906     57906     guizhou        106.0894       25.1750          139       144     2012      05        05        126              0.242522      31.192688       1.049672       0.192372       0.162000   -9999.000000   -9999.000000   -9999.000000
57906     57906     guizhou        106.0894       25.1750          139       144     2012      05        06        127              0.239542      28.354218       1.123296       0.226201       0.144000       0.408300   -9999.000000       0.163000
57906     57906     guizhou        106.0894       25.1750          139       144     2012      05        07        128              0.221042      30.843231       0.000000       0.205762   -9999.000000       0.251300       0.114500   -9999.000000
57906     57906     guizhou        106.0894       25.1750          139       144     2012      05        08        129              0.199136      31.605347       8.278451       0.186114   -9999.000000   -9999.000000       0.132500       0.895000
57906     57906     guizhou        106.0894       25.1750          139       144     2012      05        09        130              0.193875      31.500153      35.177696       0.211749   -9999.000000       0.285800       0.116300       0.628000
57906     57906     guizhou        106.0894       25.1750          139       144     2012      05        10        131              0.203208      31.168793       0.495113       0.266136       0.187500   -9999.000000   -9999.000000       0.295000
57906     57906     guizhou        106.0894       25.1750          139       144     2012      05        11        132              0.200375      28.982361       0.680264       0.293444       0.167000       0.378700   -9999.000000       0.517000
57906     57906     guizhou        106.0894       25.1750          139       144     2012      05        12        133              0.183458      31.565125       1.582336       0.245328       0.165500       0.254500       0.123000   -9999.000000
57906     57906     guizhou        106.0894       25.1750          139       144     2012      05        13        134              0.176000      29.262665       9.379343       0.239894   -9999.000000   -9999.000000       0.136700       0.184000
57906     57906     guizhou        106.0894       25.1750          139       144     2012      05        14        135              0.174000      28.161835       0.938624       0.244636   -9999.000000       0.364000       0.104400       0.511000
57906     57906     guizhou        106.0894       25.1750          139       144     2012      05        15        136              0.173917      25.396271       0.000000       0.258694       0.190000   -9999.000000   -9999.000000       0.089000
57906     57906     guizhou        106.0894       25.1750          139       144     2012      05        16        137              0.170250      25.735016       6.524980       0.241182       0.177500       0.208600   -9999.000000       0.401000
57906     57906     guizhou        106.0894       25.1750          139       144     2012      05        17        138              0.175667      28.062408       1.077102       0.240833       0.186000       0.283600   -9999.000000   -9999.000000
57906     57906     guizhou        106.0894       25.1750          139       144     2012      05        18        139              0.190292      25.661469       5.685010       0.256096   -9999.000000   -9999.000000       0.102900       0.433000
57906     57906     guizhou        106.0894       25.1750          139       144     2012      05        19        140              0.190167      29.266479      10.568999       0.246219   -9999.000000       0.405200       0.109400   -9999.000000
57906     57906     guizhou        106.0894       25.1750          139       144     2012      05        20        141              0.203042      29.140289      21.250528       0.279856       0.204000   -9999.000000       0.111300       0.587000
57906     57906     guizhou        106.0894       25.1750          139       144     2012      05        21        142              0.267304      28.087128      60.580093       0.290808       0.165000   -9999.000000   -9999.000000       0.938000
57906     57906     guizhou        106.0894       25.1750          139       144     2012      05        22        143              0.311167      28.389160      10.973756       0.322264       0.176000       0.401900   -9999.000000   -9999.000000
57906     57906     guizhou        106.0894       25.1750          139       144     2012      05        23        144              0.312000      25.871887       1.603425       0.313432   -9999.000000   -9999.000000   -9999.000000       0.654000
57906     57906     guizhou        106.0894       25.1750          139       144     2012      05        24        145              0.326625      24.728577       0.934372       0.286869   -9999.000000       0.380700       0.089900   -9999.000000
57906     57906     guizhou        106.0894       25.1750          139       144     2012      05        25        146              0.000000      24.558929       2.045938       0.280229       0.193000       0.120500       0.090100       0.615000
57906     57906     guizhou        106.0894       25.1750          139       144     2012      05        26        147              0.350625      23.649780       1.292068       0.275668       0.172500   -9999.000000       0.080400       0.741000
57906     57906     guizhou        106.0894       25.1750          139       144     2012      05        27        148              0.351250      25.007568       2.268115       0.271995       0.158000       0.229500   -9999.000000       0.592000
57906     57906     guizhou        106.0894       25.1750          139       144     2012      05        28        149              0.351250      28.518127       2.843179       0.263941       0.152000   -9999.000000   -9999.000000       0.619000
57906     57906     guizhou        106.0894       25.1750          139       144     2012      05        29        150              0.357333      28.638245      17.712399       0.263562   -9999.000000       0.261900       0.090000   -9999.000000
57906     57906     guizhou        106.0894       25.1750          139       144     2012      05        30        151              0.356875      25.481659       0.000000       0.301608   -9999.000000       0.483000       0.088600   -9999.000000
57906     57906     guizhou        106.0894       25.1750          139       144     2012      05        31        152              0.354875      25.363068       0.050256       0.275160       0.177500   -9999.000000       0.081300   -9999.000000
57906     57906     guizhou        106.0894       25.1750          139       144     2012      06        01        153              0.352625      25.939148       8.108180       0.265004       0.237000       0.145500   -9999.000000       0.673000
57906     57906     guizhou        106.0894       25.1750          139       144     2012      06        02        154              0.372083      23.979858       2.492924       0.274428       0.221500   -9999.000000   -9999.000000       0.983000
57906     57906     guizhou        106.0894       25.1750          139       144     2012      06        03        155              0.368833      24.467041      14.085960       0.281096   -9999.000000       0.171200   -9999.000000   -9999.000000
57906     57906     guizhou        106.0894       25.1750          139       144     2012      06        04        156              0.382750      25.288757       6.104799       0.282400   -9999.000000       0.104600       0.112600       0.636000
57906     57906     guizhou        106.0894       25.1750          139       144     2012      06        05        157              0.385208      24.518555       0.602517       0.295261       0.211000   -9999.000000       0.112300   -9999.000000
57906     57906     guizhou        106.0894       25.1750          139       144     2012      06        06        158              0.373917      27.004639       5.110421       0.281210       0.181000       0.314900       0.097300       0.578000
57906     57906     guizhou        106.0894       25.1750          139       144     2012      06        07        159              0.361250      30.390839       2.148451       0.273882       0.207500   -9999.000000   -9999.000000       0.648000
57906     57906     guizhou        106.0894       25.1750          139       144     2012      06        08        160              0.369250      26.819458       0.913070       0.275458   -9999.000000   -9999.000000   -9999.000000       0.543000
57906     57906     guizhou        106.0894       25.1750          139       144     2012      06        09        161              0.362417      28.363586       0.962599       0.268247   -9999.000000       0.331000       0.116600       0.728000
57906     57906     guizhou        106.0894       25.1750          139       144     2012      06        10        162              0.360583      30.271454      20.160759       0.260040       0.200000   -9999.000000       0.114700   -9999.000000
57906     57906     guizhou        106.0894       25.1750          139       144     2012      06        11        163              0.000000      30.421539       2.964313       0.303773       0.198000       0.394600       0.090100       0.662000
57906     57906     guizhou        106.0894       25.1750          139       144     2012      06        12        164              0.383000      28.634735       4.048070       0.284557       0.205000       0.173700   -9999.000000       0.640000
57906     57906     guizhou        106.0894       25.1750          139       144     2012      06        13        165              0.378500      26.477386      13.575592       0.277071       0.194000   -9999.000000   -9999.000000       0.612000
57906     57906     guizhou        106.0894       25.1750          139       144     2012      06        14        166              0.379125      28.658386       8.390216       0.283644   -9999.000000       0.392000   -9999.000000       0.890000
57906     57906     guizhou        106.0894       25.1750          139       144     2012      06        15        167              0.376083      27.921356       0.293993       0.297369       0.187000   -9999.000000       0.082100   -9999.000000
57906     57906     guizhou        106.0894       25.1750          139       144     2012      06        16        168              0.365792      27.930176       0.207123       0.272465       0.181500       0.167300       0.088500       0.503000
57906     57906     guizhou        106.0894       25.1750          139       144     2012      06        17        169              0.346417      28.789398       0.000000       0.260594       0.175000       0.321100       0.078100   -9999.000000
57906     57906     guizhou        106.0894       25.1750          139       144     2012      06        18        170              0.332826      29.847931      21.605782       0.250734       0.163000   -9999.000000   -9999.000000       0.356000
57906     57906     guizhou        106.0894       25.1750          139       144     2012      06        19        171              0.395143      29.199493       2.205735       0.273157   -9999.000000       0.358300   -9999.000000       0.811000
57906     57906     guizhou        106.0894       25.1750          139       144     2012      06        20        172              0.385292      25.243134       0.000000       0.290516   -9999.000000   -9999.000000   -9999.000000   -9999.000000
57906     57906     guizhou        106.0894       25.1750          139       144     2012      06        21        173              0.373292      28.234711      23.535082       0.268694       0.235000       0.327000       0.080100       0.564000
57906     57906     guizhou        106.0894       25.1750          139       144     2012      06        22        174              0.403333      27.818390      22.267202       0.286671       0.250000       0.386800       0.115200   -9999.000000
57906     57906     guizhou        106.0894       25.1750          139       144     2012      06        23        175              0.391708      25.488342       0.000000       0.317365       0.207500   -9999.000000       0.103200       0.511000
57906     57906     guizhou        106.0894       25.1750          139       144     2012      06        24        176              0.382958      27.815918       0.503221       0.283269   -9999.000000       0.400600   -9999.000000       0.625000
57906     57906     guizhou        106.0894       25.1750          139       144     2012      06        25        177              0.377750      28.232117       1.623469       0.274477   -9999.000000   -9999.000000   -9999.000000       0.765000
57906     57906     guizhou        106.0894       25.1750          139       144     2012      06        26        178              0.398609      29.428619      55.033573       0.271975   -9999.000000       0.241000       0.157300       0.670000
57906     57906     guizhou        106.0894       25.1750          139       144     2012      06        27        179              0.414667      27.938202      12.844532       0.314531       0.230500       0.327200       0.129100   -9999.000000
57906     57906     guizhou        106.0894       25.1750          139       144     2012      06        28        180              0.408792      28.361176       7.455481       0.332009       0.211000   -9999.000000       0.147900       0.648000
57906     57906     guizhou        106.0894       25.1750          139       144     2012      06        29        181              0.399208      28.212799       0.000000       0.319461   -9999.000000       0.555900   -9999.000000   -9999.000000
57906     57906     guizhou        106.0894       25.1750          139       144     2012      06        30        182              0.383375      30.466003       3.894981       0.291816   -9999.000000       0.327200   -9999.000000   -9999.000000
57906     57906     guizhou        106.0894       25.1750          139       144     2012      07        01        183              0.348375      31.023102       6.679328       0.287316       0.258000   -9999.000000   -9999.000000       0.922000
57906     57906     guizhou        106.0894       25.1750          139       144     2012      07        02        184              0.347958      29.038513       0.362406       0.295562       0.232000       0.339600       0.138900   -9999.000000
57906     57906     guizhou        106.0894       25.1750          139       144     2012      07        03        185              0.338042      29.298523       0.000000       0.282955       0.216000   -9999.000000       0.137800       0.339000
57906     57906     guizhou        106.0894       25.1750          139       144     2012      07        04        186              0.293333      29.833588       0.000000       0.275530       0.214000       0.316800       0.130600   -9999.000000
57906     57906     guizhou        106.0894       25.1750          139       144     2012      07        05        187              0.241625      30.152588       0.184593       0.270896   -9999.000000       0.275300   -9999.000000       0.495000
57906     57906     guizhou        106.0894       25.1750          139       144     2012      07        06        188              0.202000      30.344513       0.000000       0.267987   -9999.000000   -9999.000000   -9999.000000       0.492000
57906     57906     guizhou        106.0894       25.1750          139       144     2012      07        07        189              0.179042      31.377075       0.099028       0.263646   -9999.000000       0.311600   -9999.000000       0.378000
57906     57906     guizhou        106.0894       25.1750          139       144     2012      07        08        190              0.166083      31.022034       0.269196       0.262042       0.208000   -9999.000000       0.130900       0.422000
57906     57906     guizhou        106.0894       25.1750          139       144     2012      07        09        191              0.158042      31.117188       0.000000       0.259375       0.206000       0.332900       0.151700   -9999.000000
57906     57906     guizhou        106.0894       25.1750          139       144     2012      07        10        192              0.151667      31.696350       0.000000       0.255966   -9999.000000       0.262800       0.131600       0.457000
57906     57906     guizhou        106.0894       25.1750          139       144     2012      07        11        193              0.145125      32.455017       0.000000       0.252306   -9999.000000   -9999.000000   -9999.000000       0.277000
57906     57906     guizhou        106.0894       25.1750          139       144     2012      07        12        194              0.139542      32.749786       1.859721       0.248734       0.256000       0.174300   -9999.000000       0.243000
57906     57906     guizhou        106.0894       25.1750          139       144     2012      07        13        195              0.158042      31.215240      22.638847       0.252395       0.273500   -9999.000000       0.152500       1.000000
57906     57906     guizhou        106.0894       25.1750          139       144     2012      07        14        196              0.267083      28.197815      22.595150       0.301406       0.242000   -9999.000000       0.148900   -9999.000000
57906     57906     guizhou        106.0894       25.1750          139       144     2012      07        15        197              0.314833      29.363129       0.348581       0.310147   -9999.000000       0.315200       0.139000       0.697000
57906     57906     guizhou        106.0894       25.1750          139       144     2012      07        16        198              0.347375      30.643829      25.467598       0.284937   -9999.000000   -9999.000000   -9999.000000   -9999.000000
57906     57906     guizhou        106.0894       25.1750          139       144     2012      07        17        199              0.405375      28.413300      16.864920       0.305998       0.290000       0.320500   -9999.000000       0.969000
57906     57906     guizhou        106.0894       25.1750          139       144     2012      07        18        200              0.408875      27.427490      14.236681       0.315336   -9999.000000       0.239600   -9999.000000       0.802000
57906     57906     guizhou        106.0894       25.1750          139       144     2012      07        19        201              0.417583      28.329956       7.113550       0.308943       0.248000   -9999.000000       0.131200   -9999.000000
57906     57906     guizhou        106.0894       25.1750          139       144     2012      07        20        202              0.408292      28.650360       0.191937       0.303532       0.228000       0.246400       0.138600       0.618000
57906     57906     guizhou        106.0894       25.1750          139       144     2012      07        21        203              0.395333      30.504822       0.255052       0.284931   -9999.000000   -9999.000000       0.119800   -9999.000000
57906     57906     guizhou        106.0894       25.1750          139       144     2012      07        22        204              0.388417      31.841980      45.563976       0.277494   -9999.000000       0.190900   -9999.000000       1.000000
57906     57906     guizhou        106.0894       25.1750          139       144     2012      07        23        205              0.414174      29.727112       2.146798       0.322071       0.335500       0.360700   -9999.000000       0.705000
57906     57906     guizhou        106.0894       25.1750          139       144     2012      07        24        206              0.407333      28.789612       6.058802       0.303149       0.317000   -9999.000000   -9999.000000       0.731000
57906     57906     guizhou        106.0894       25.1750          139       144     2012      07        25        207              0.413583      27.649475      15.725200       0.299189       0.333500       0.329600       0.099900       0.715000
57906     57906     guizhou        106.0894       25.1750          139       144     2012      07        26        208              0.410417      27.746185       9.796927       0.313900   -9999.000000   -9999.000000       0.104300   -9999.000000
57906     57906     guizhou        106.0894       25.1750          139       144     2012      07        27        209              0.402833      28.404297      10.479152       0.308805   -9999.000000       0.239700       0.089200       0.674000
57906     57906     guizhou        106.0894       25.1750          139       144     2012      07        28        210              0.397083      28.522308       7.400213       0.309336       0.331000       0.425700   -9999.000000   -9999.000000
57906     57906     guizhou        106.0894       25.1750          139       144     2012      07        29        211              0.397083      27.969299       3.548198       0.305994       0.318000   -9999.000000   -9999.000000       0.608000
57906     57906     guizhou        106.0894       25.1750          139       144     2012      07        30        212              0.401000      29.205353       0.000000       0.298801       0.299500       0.494600       0.134800       0.563000
57906     57906     guizhou        106.0894       25.1750          139       144     2012      07        31        213              0.395250      29.768280       1.342507       0.289262       0.290000   -9999.000000       0.134500   -9999.000000
57906     57906     guizhou        106.0894       25.1750          139       144     2012      08        01        214              0.383792      30.576355       1.762468       0.283310   -9999.000000       0.430500       0.129000       0.460000
57906     57906     guizhou        106.0894       25.1750          139       144     2012      08        02        215              0.369833      30.098907       2.952169       0.281505   -9999.000000       0.446200   -9999.000000   -9999.000000
57906     57906     guizhou        106.0894       25.1750          139       144     2012      08        03        216              0.362750      30.447632       0.855056       0.279303       0.395000   -9999.000000   -9999.000000       0.485000
57906     57906     guizhou        106.0894       25.1750          139       144     2012      08        04        217              0.341250      30.361053       0.000000       0.272200       0.396000       0.271200   -9999.000000       0.543000
57906     57906     guizhou        106.0894       25.1750          139       144     2012      08        05        218              0.309167      30.703308       2.708800       0.267441       0.387000       0.188700       0.135000       0.518000
57906     57906     guizhou        106.0894       25.1750          139       144     2012      08        06        219              0.328375      30.814423       6.970148       0.272843   -9999.000000   -9999.000000       0.200700       0.518000
57906     57906     guizhou        106.0894       25.1750          139       144     2012      08        07        220              0.369125      28.261017       8.246200       0.285668   -9999.000000       0.301300       0.166000   -9999.000000
57906     57906     guizhou        106.0894       25.1750          139       144     2012      08        08        221              0.368750      27.687042       0.000000       0.294538       0.408500   -9999.000000   -9999.000000       0.479000
57906     57906     guizhou        106.0894       25.1750          139       144     2012      08        09        222              0.356208      30.042542       1.206413       0.275921       0.369500       0.313000   -9999.000000       0.551000
57906     57906     guizhou        106.0894       25.1750          139       144     2012      08        10        223              0.322083      30.486206       0.995183       0.266552       0.371500       0.254000   -9999.000000       0.271000
57906     57906     guizhou        106.0894       25.1750          139       144     2012      08        11        224              0.270750      30.321808       0.161834       0.264662   -9999.000000   -9999.000000       0.171700       0.423000
57906     57906     guizhou        106.0894       25.1750          139       144     2012      08        12        225              0.228708      30.701874       0.000000       0.258896   -9999.000000       0.158400       0.172700   -9999.000000
57906     57906     guizhou        106.0894       25.1750          139       144     2012      08        13        226              0.231250      31.198517       0.973634       0.255563       0.296000   -9999.000000   -9999.000000       0.497000
57906     57906     guizhou        106.0894       25.1750          139       144     2012      08        14        227              0.237042      30.591125       0.292234       0.258423       0.275000       0.160900   -9999.000000   -9999.000000
57906     57906     guizhou        106.0894       25.1750          139       144     2012      08        15        228              0.213000      31.163635       1.697848       0.253784       0.278000       0.136900   -9999.000000       0.225000
57906     57906     guizhou        106.0894       25.1750          139       144     2012      08        16        229              0.191000      31.454559       0.062023       0.252767       0.213000   -9999.000000       0.119500       0.222000
57906     57906     guizhou        106.0894       25.1750          139       144     2012      08        17        230              0.181250      31.584259       9.490973       0.248313   -9999.000000       0.326500       0.132800   -9999.000000
57906     57906     guizhou        106.0894       25.1750          139       144     2012      08        18        231              0.185292      30.689148       5.014747       0.271716   -9999.000000   -9999.000000       0.122400       0.700000
57906     57906     guizhou        106.0894       25.1750          139       144     2012      08        19        232              0.189125      27.859955       0.059151       0.278962       0.286500       0.411400   -9999.000000   -9999.000000
57906     57906     guizhou        106.0894       25.1750          139       144     2012      08        20        233              0.184250      29.427551      17.427097       0.263056       0.276500       0.328700   -9999.000000       0.187000
57906     57906     guizhou        106.0894       25.1750          139       144     2012      08        21        234              0.403708      30.967743       6.773546       0.266740       0.290500   -9999.000000   -9999.000000       0.586000
57906     57906     guizhou        106.0894       25.1750          139       144     2012      08        22        235              0.391750      28.555450       0.000000       0.296537   -9999.000000       0.275200       0.100500   -9999.000000
57906     57906     guizhou        106.0894       25.1750          139       144     2012      08        23        236              0.379083      27.830536       0.000000       0.271016   -9999.000000       0.287600       0.105100       0.428000
57906     57906     guizhou        106.0894       25.1750          139       144     2012      08        24        237              0.357083      27.842621       0.000000       0.258737   -9999.000000   -9999.000000       0.096600   -9999.000000
57906     57906     guizhou        106.0894       25.1750          139       144     2012      08        25        238              0.000000      28.321503       0.000000       0.250785       0.291000       0.231200   -9999.000000       0.256000
57906     57906     guizhou        106.0894       25.1750          139       144     2012      08        26        239              0.304542      28.701294       0.000000       0.247608       0.297500   -9999.000000   -9999.000000   -9999.000000
57906     57906     guizhou        106.0894       25.1750          139       144     2012      08        27        240              0.282583      28.254364       0.000000       0.244972       0.264000       0.205900       0.098600       0.172000
57906     57906     guizhou        106.0894       25.1750          139       144     2012      08        28        241              0.259875      28.253204       0.000000       0.242526   -9999.000000       0.077900       0.094200       0.297000
57906     57906     guizhou        106.0894       25.1750          139       144     2012      08        29        242              0.239917      29.518677       0.364918       0.237985   -9999.000000   -9999.000000       0.095600   -9999.000000
57906     57906     guizhou        106.0894       25.1750          139       144     2012      08        30        243              0.227500      30.560242       0.000000       0.236790       0.284500       0.209400   -9999.000000       0.176000
57906     57906     guizhou        106.0894       25.1750          139       144     2012      08        31        244              0.218083      30.945892       0.000000       0.231488       0.300500   -9999.000000   -9999.000000   -9999.000000
57906     57906     guizhou        106.0894       25.1750          139       144     2012      09        01        245              0.209917      30.936859       0.307710       0.226999       0.261500       0.233900   -9999.000000       0.309000
57906     57906     guizhou        106.0894       25.1750          139       144     2012      09        02        246              0.341250      30.547241       7.807409       0.225063   -9999.000000       0.203600       0.093500       0.678000
57906     57906     guizhou        106.0894       25.1750          139       144     2012      09        03        247              0.397000      26.634644       0.000000       0.263236   -9999.000000   -9999.000000       0.088400       0.247000
57906     57906     guizhou        106.0894       25.1750          139       144     2012      09        04        248              0.386917      27.354767       0.000000       0.246271       0.263000       0.303200       0.082000       0.261000
57906     57906     guizhou        106.0894       25.1750          139       144     2012      09        05        249              0.377583      27.125763       0.000000       0.236382       0.264500   -9999.000000   -9999.000000   -9999.000000
57906     57906     guizhou        106.0894       25.1750          139       144     2012      09        06        250              0.366292      28.232574       0.191296       0.230450       0.271000       0.313400   -9999.000000       0.301000
57906     57906     guizhou        106.0894       25.1750          139       144     2012      09        07        251              0.350250      28.239502       0.167828       0.229229   -9999.000000       0.369200   -9999.000000       0.283000
57906     57906     guizhou        106.0894       25.1750          139       144     2012      09        08        252              0.332333      29.462738       1.963882       0.226591   -9999.000000   -9999.000000       0.086500       0.254000
57906     57906     guizhou        106.0894       25.1750          139       144     2012      09        09        253              0.309583      28.847595       0.880777       0.237110       0.290000       0.234100       0.089700       0.258000
57906     57906     guizhou        106.0894       25.1750          139       144     2012      09        10        254              0.284000      29.983582       0.000000       0.229115       0.256500       0.169900       0.116500   -9999.000000
57906     57906     guizhou        106.0894       25.1750          139       144     2012      09        11        255              0.261167      30.132812       0.435977       0.224431       0.196000   -9999.000000   -9999.000000       0.306000
57906     57906     guizhou        106.0894       25.1750          139       144     2012      09        12        256              0.373417      29.647156      42.444416       0.222216       0.246000       0.406300   -9999.000000   -9999.000000
57906     57906     guizhou        106.0894       25.1750          139       144     2012      09        13        257              0.404875      25.028687       1.800578       0.337876   -9999.000000   -9999.000000       0.135500       0.495000
57906     57906     guizhou        106.0894       25.1750          139       144     2012      09        14        258              0.397583      23.706207       0.000000       0.286017   -9999.000000       0.337200       0.123500       0.487000
57906     57906     guizhou        106.0894       25.1750          139       144     2012      09        15        259              0.388500      25.106903       0.000000       0.267443       0.203500       0.122700       0.126300   -9999.000000
57906     57906     guizhou        106.0894       25.1750          139       144     2012      09        16        260              0.379625      25.827362       1.549809       0.257337       0.217500   -9999.000000   -9999.000000       0.338000
57906     57906     guizhou        106.0894       25.1750          139       144     2012      09        17        261              0.377000      25.784302       1.810880       0.254373       0.233500       0.337400   -9999.000000   -9999.000000
57906     57906     guizhou        106.0894       25.1750          139       144     2012      09        18        262              0.378250      23.719818       5.113349       0.263350   -9999.000000   -9999.000000   -9999.000000       0.335000
57906     57906     guizhou        106.0894       25.1750          139       144     2012      09        19        263              0.409625      22.683838      15.035678       0.264757   -9999.000000       0.440600       0.060700       0.738000
57906     57906     guizhou        106.0894       25.1750          139       144     2012      09        20        264              0.404000      21.512085       0.065244       0.300951       0.248000       0.273200       0.064800       0.517000
57906     57906     guizhou        106.0894       25.1750          139       144     2012      09        21        265              0.403958      23.090057       0.379837       0.276191   -9999.000000   -9999.000000       0.057700       0.499000
57906     57906     guizhou        106.0894       25.1750          139       144     2012      09        22        266              0.408458      23.409729       2.151217       0.270524       0.193000       0.271600   -9999.000000   -9999.000000
57906     57906     guizhou        106.0894       25.1750          139       144     2012      09        23        267              0.407000      24.356140       0.309194       0.268379       0.178000   -9999.000000   -9999.000000       0.393000
57906     57906     guizhou        106.0894       25.1750          139       144     2012      09        24        268              0.411208      24.539612       2.052195       0.268246   -9999.000000       0.283700   -9999.000000   -9999.000000
57906     57906     guizhou        106.0894       25.1750          139       144     2012      09        25        269              0.405875      24.312408       1.241941       0.269282   -9999.000000       0.266600       0.100500       0.474000
57906     57906     guizhou        106.0894       25.1750          139       144     2012      09        26        270              0.404000      25.269379       0.289311       0.263359       0.190000   -9999.000000       0.111500       0.559000
57906     57906     guizhou        106.0894       25.1750          139       144     2012      09        27        271              0.400000      26.488739       0.400206       0.261289       0.190500       0.402200       0.095900   -9999.000000
57906     57906     guizhou        106.0894       25.1750          139       144     2012      09        28        272              0.394200      25.047089       0.000000       0.257657       0.178000   -9999.000000   -9999.000000       0.271000
57906     57906     guizhou        106.0894       25.1750          139       144     2012      09        29        273              0.388000      25.365967       0.000000       0.251411   -9999.000000   -9999.000000   -9999.000000   -9999.000000
57906     57906     guizhou        106.0894       25.1750          139       144     2012      09        30        274              0.379042      25.461609       0.232184       0.244296   -9999.000000       0.465000       0.091600       0.319000
57906     57906     guizhou        106.0894       25.1750          139       144     2012      10        01        275              0.362833      25.741150       0.000000       0.241140       0.127000   -9999.000000       0.052800       0.448000
57906     57906     guizhou        106.0894       25.1750          139       144     2012      10        02        276              0.340042      26.514740       0.000000       0.237580       0.126500       0.419700       0.050600       0.233000
57906     57906     guizhou        106.0894       25.1750          139       144     2012      10        03        277              0.356667      26.866333       7.911577       0.234462       0.143000       0.115500   -9999.000000       0.407000
57906     57906     guizhou        106.0894       25.1750          139       144     2012      10        04        278              0.383042      23.373230       4.646945       0.263596       0.155000   -9999.000000   -9999.000000   -9999.000000
57906     57906     guizhou        106.0894       25.1750          139       144     2012      10        05        279              0.407417      22.941132       4.851706       0.271274   -9999.000000       0.475000   -9999.000000       0.768000
57906     57906     guizhou        106.0894       25.1750          139       144     2012      10        06        280              0.406375      22.108307       0.104316       0.281495       0.145000   -9999.000000       0.055700       0.584000
57906     57906     guizhou        106.0894       25.1750          139       144     2012      10        07        281              0.403167      22.223541       0.071616       0.267146       0.137500       0.199700       0.061900       0.379000
57906     57906     guizhou        106.0894       25.1750          139       144     2012      10        08        282              0.398917      24.119049       1.093302       0.259884       0.130000   -9999.000000       0.044800       0.593000
57906     57906     guizhou        106.0894       25.1750          139       144     2012      10        09        283              0.414250      25.196228       2.376498       0.256552       0.125500   -9999.000000   -9999.000000   -9999.000000
57906     57906     guizhou        106.0894       25.1750          139       144     2012      10        10        284              0.405625      21.904388       0.000000       0.267139   -9999.000000       0.300100   -9999.000000       0.435000
57906     57906     guizhou        106.0894       25.1750          139       144     2012      10        11        285              0.402333      22.904327       0.250104       0.257699   -9999.000000   -9999.000000   -9999.000000   -9999.000000
57906     57906     guizhou        106.0894       25.1750          139       144     2012      10        12        286              0.398417      23.593658       1.282112       0.254860       0.222500       0.212100       0.054200   -9999.000000
57906     57906     guizhou        106.0894       25.1750          139       144     2012      10        13        287              0.404750      25.277039       2.051047       0.252593       0.224000       0.271200       0.051600       0.664000
57906     57906     guizhou        106.0894       25.1750          139       144     2012      10        14        288              0.400167      21.927338       0.000000       0.263117       0.192000   -9999.000000   -9999.000000   -9999.000000
57906     57906     guizhou        106.0894       25.1750          139       144     2012      10        15        289              0.398125      23.164093       0.000000       0.256342   -9999.000000       0.506200   -9999.000000       0.466000
57906     57906     guizhou        106.0894       25.1750          139       144     2012      10        16        290              0.400917      27.260681       0.341027       0.250595   -9999.000000   -9999.000000   -9999.000000   -9999.000000
57906     57906     guizhou        106.0894       25.1750          139       144     2012      10        17        291              0.393375      25.510132       0.000000       0.247632       0.197000   -9999.000000       0.072000       0.227000
57906     57906     guizhou        106.0894       25.1750          139       144     2012      10        18        292              0.380583      23.620972       0.000000       0.241197       0.191000       0.171700       0.075500       0.394000
57906     57906     guizhou        106.0894       25.1750          139       144     2012      10        19        293              0.368458      24.784821       0.000000       0.237880       0.185500   -9999.000000       0.070500       0.282000
57906     57906     guizhou        106.0894       25.1750          139       144     2012      10        20        294              0.351292      25.443970       0.000000       0.238209       0.177000       0.303000   -9999.000000       0.394000
57906     57906     guizhou        106.0894       25.1750          139       144     2012      10        21        295              0.327833      26.874054       0.000000       0.235508   -9999.000000       0.131400   -9999.000000   -9999.000000
57906     57906     guizhou        106.0894       25.1750          139       144     2012      10        22        296              0.305333      27.079651       0.041905       0.232817   -9999.000000   -9999.000000   -9999.000000       0.116000
57906     57906     guizhou        106.0894       25.1750          139       144     2012      10        23        297              0.287833      26.012177       0.000000       0.230617   -9999.000000       0.267500       0.059600   -9999.000000
57906     57906     guizhou        106.0894       25.1750          139       144     2012      10        24        298              0.272875      25.803436       0.127976       0.228833   -9999.000000   -9999.000000       0.062400       0.221000
57906     57906     guizhou        106.0894       25.1750          139       144     2012      10        25        299              0.000000      24.121674       0.126359       0.230064       0.154000       0.267200       0.057600       0.320000
57906     57906     guizhou        106.0894       25.1750          139       144     2012      10        26        300              0.248333      25.339600       1.779448       0.229121   -9999.000000       0.189700   -9999.000000   -9999.000000
57906     57906     guizhou        106.0894       25.1750          139       144     2012      10        27        301              0.238208      25.830292       0.209112       0.229853   -9999.000000   -9999.000000   -9999.000000       0.149000
57906     57906     guizhou        106.0894       25.1750          139       144     2012      10        28        302              0.000000      24.682343       3.143951       0.237073       0.181000       0.384400       0.068300   -9999.000000
57906     57906     guizhou        106.0894       25.1750          139       144     2012      10        29        303              0.273667      23.603790       5.452499       0.248713       0.171000   -9999.000000       0.117900       0.377000
57906     57906     guizhou        106.0894       25.1750          139       144     2012      10        30        304              0.277417      23.418793       0.962916       0.257501       0.167000       0.325600       0.115400       0.559000
57906     57906     guizhou        106.0894       25.1750          139       144     2012      10        31        305              0.271333      19.922852       0.000000       0.262011       0.157000       0.266500   -9999.000000       0.044000
57906     57906     guizhou        106.0894       25.1750          139       144     2012      11        01        306              0.259167      20.296295       0.000000       0.249187   -9999.000000   -9999.000000   -9999.000000       0.313000
57906     57906     guizhou        106.0894       25.1750          139       144     2012      11        02        307              0.248417      19.855499       0.000000       0.244882       0.174000       0.178400   -9999.000000   -9999.000000
57906     57906     guizhou        106.0894       25.1750          139       144     2012      11        03        308              0.240417      21.615082       0.000000       0.241586       0.178000   -9999.000000       0.105900       0.317000
57906     57906     guizhou        106.0894       25.1750          139       144     2012      11        04        309              0.233292      22.070923       0.000000       0.240490       0.172000   -9999.000000       0.116800       0.275000
57906     57906     guizhou        106.0894       25.1750          139       144     2012      11        05        310              0.234500      21.847046      17.794355       0.238830       0.188500       0.315400       0.138500       0.799000
57906     57906     guizhou        106.0894       25.1750          139       144     2012      11        06        311              0.281667      20.576477       2.823125       0.271454   -9999.000000   -9999.000000   -9999.000000       0.603000
57906     57906     guizhou        106.0894       25.1750          139       144     2012      11        07        312              0.307708      18.532257       1.869758       0.285717   -9999.000000       0.380300   -9999.000000   -9999.000000
57906     57906     guizhou        106.0894       25.1750          139       144     2012      11        08        313              0.347500      17.943268       0.053667       0.276255       0.199000       0.163100   -9999.000000       0.603000
57906     57906     guizhou        106.0894       25.1750          139       144     2012      11        09        314              0.353333      17.969635       0.693766       0.268043       0.174000   -9999.000000       0.139700   -9999.000000
57906     57906     guizhou        106.0894       25.1750          139       144     2012      11        10        315              0.350583      22.407257       0.000000       0.261101       0.167500       0.543200       0.153000       0.237000
57906     57906     guizhou        106.0894       25.1750          139       144     2012      11        11        316              0.344292      21.289032       0.000000       0.254464   -9999.000000   -9999.000000       0.136300       0.195000
57906     57906     guizhou        106.0894       25.1750          139       144     2012      11        12        317              0.334000      18.497864       0.000000       0.252857   -9999.000000       0.343100   -9999.000000   -9999.000000
57906     57906     guizhou        106.0894       25.1750          139       144     2012      11        13        318              0.000000      21.128479       0.000000       0.249379       0.140000       0.221600   -9999.000000       0.275000
57906     57906     guizhou        106.0894       25.1750          139       144     2012      11        14        319              0.312875      20.613739       0.000000       0.248745       0.133000   -9999.000000       0.157900   -9999.000000
57906     57906     guizhou        106.0894       25.1750          139       144     2012      11        15        320              0.304250      21.671570       1.253282       0.247684       0.135500       0.257100       0.153900       0.182000
57906     57906     guizhou        106.0894       25.1750          139       144     2012      11        16        321              0.376375      23.994232      21.156298       0.248210   -9999.000000   -9999.000000       0.142200       0.790000
57906     57906     guizhou        106.0894       25.1750          139       144     2012      11        17        322              0.000000      17.838715       0.000000       0.303140   -9999.000000       0.242000   -9999.000000       0.395000
57906     57906     guizhou        106.0894       25.1750          139       144     2012      11        18        323              0.383000      18.496490       0.000000       0.272451   -9999.000000       0.221700   -9999.000000       0.379000
57906     57906     guizhou        106.0894       25.1750          139       144     2012      11        19        324              0.380000      19.545197       0.344308       0.264480       0.152000   -9999.000000   -9999.000000   -9999.000000
57906     57906     guizhou        106.0894       25.1750          139       144     2012      11        20        325              0.377625      18.903961       0.000000       0.263395       0.143000       0.319700       0.148900       0.302000
57906     57906     guizhou        106.0894       25.1750          139       144     2012      11        21        326              0.371417      22.031891       0.000000       0.258767       0.114500   -9999.000000       0.160300   -9999.000000
57906     57906     guizhou        106.0894       25.1750          139       144     2012      11        22        327              0.367167      21.773407       0.000000       0.254977   -9999.000000   -9999.000000       0.150600       0.245000
57906     57906     guizhou        106.0894       25.1750          139       144     2012      11        23        328              0.354417      20.065186       0.000000       0.253522   -9999.000000       0.360700   -9999.000000       0.283000
57906     57906     guizhou        106.0894       25.1750          139       144     2012      11        24        329              0.342500      18.017059       0.000000       0.251324       0.131500   -9999.000000   -9999.000000   -9999.000000
57906     57906     guizhou        106.0894       25.1750          139       144     2012      11        25        330              0.330375      16.565613       0.000000       0.251497       0.122500       0.316400   -9999.000000       0.019000
57906     57906     guizhou        106.0894       25.1750          139       144     2012      11        26        331              0.311750      19.874115       0.000000       0.248528       0.129500       0.243500   -9999.000000   -9999.000000
57906     57906     guizhou        106.0894       25.1750          139       144     2012      11        27        332              0.299625      15.916809       0.167570       0.246755       0.129000   -9999.000000       0.102100       0.157000
57906     57906     guizhou        106.0894       25.1750          139       144     2012      11        28        333              0.302458      16.012085       0.154615       0.247789   -9999.000000       0.251700   -9999.000000       0.045000
57906     57906     guizhou        106.0894       25.1750          139       144     2012      11        29        334              0.322833      14.665222       1.425324       0.249634       0.135000   -9999.000000   -9999.000000       0.307000
57906     57906     guizhou        106.0894       25.1750          139       144     2012      11        30        335              0.363333      15.977844       2.711562       0.254038       0.135000       0.382100   -9999.000000       0.323000
57906     57906     guizhou        106.0894       25.1750          139       144     2012      12        01        336              0.391917      15.371582       0.620786       0.260528       0.157500       0.233400       0.095200   -9999.000000
57906     57906     guizhou        106.0894       25.1750          139       144     2012      12        02        337              0.386500      14.329193       0.000000       0.261909       0.145000   -9999.000000       0.098700       0.256000
57906     57906     guizhou        106.0894       25.1750          139       144     2012      12        03        338              0.384000      16.164703       0.323196       0.254688   -9999.000000       0.359600       0.106600       0.138000
57906     57906     guizhou        106.0894       25.1750          139       144     2012      12        04        339              0.380500      14.871338       1.073634       0.253337   -9999.000000   -9999.000000   -9999.000000       0.455000
57906     57906     guizhou        106.0894       25.1750          139       144     2012      12        05        340              0.378125      13.744965       0.000000       0.256358       0.164000       0.313300   -9999.000000       0.226000
57906     57906     guizhou        106.0894       25.1750          139       144     2012      12        06        341              0.373875      14.254456       0.000000       0.253458       0.152500       0.347900   -9999.000000   -9999.000000
57906     57906     guizhou        106.0894       25.1750          139       144     2012      12        07        342              0.370500      15.835846       0.000000       0.250141       0.162000   -9999.000000       0.113300       0.097000
57906     57906     guizhou        106.0894       25.1750          139       144     2012      12        08        343              0.367833      15.806000       0.000000       0.249666   -9999.000000       0.475000       0.121300   -9999.000000
57906     57906     guizhou        106.0894       25.1750          139       144     2012      12        09        344              0.365000      14.795563       5.306603       0.250149   -9999.000000   -9999.000000       0.116100       0.450000
57906     57906     guizhou        106.0894       25.1750          139       144     2012      12        10        345              0.374167      14.180084       0.910914       0.263908       0.165000       0.215100   -9999.000000       0.324000
57906     57906     guizhou        106.0894       25.1750          139       144     2012      12        11        346              0.378875      13.197479       2.502847       0.267900       0.158000       0.413200   -9999.000000   -9999.000000
57906     57906     guizhou        106.0894       25.1750          139       144     2012      12        12        347              0.377000      13.978546       0.250996       0.259529       0.155500   -9999.000000       0.137600       0.192000
57906     57906     guizhou        106.0894       25.1750          139       144     2012      12        13        348              0.373667      13.336884       0.000000       0.258022       0.133000       0.406100       0.129700   -9999.000000
57906     57906     guizhou        106.0894       25.1750          139       144     2012      12        14        349              0.370000      18.176361       0.000000       0.254556   -9999.000000       0.053900       0.131300       0.145000
57906     57906     guizhou        106.0894       25.1750          139       144     2012      12        15        350              0.000000      19.692719       0.000000       0.250113   -9999.000000   -9999.000000   -9999.000000       0.305000
57906     57906     guizhou        106.0894       25.1750          139       144     2012      12        16        351              0.356667      19.394501       0.210269       0.246872       0.138500       0.379900   -9999.000000       0.031000
57906     57906     guizhou        106.0894       25.1750          139       144     2012      12        17        352              0.344750      18.625977       0.000000       0.245565       0.147500   -9999.000000   -9999.000000       0.210000
57906     57906     guizhou        106.0894       25.1750          139       144     2012      12        18        353              0.331208      17.220947       0.000000       0.244701       0.145500       0.289600       0.091200   -9999.000000
57906     57906     guizhou        106.0894       25.1750          139       144     2012      12        19        354              0.318167      14.848694       0.000000       0.244080   -9999.000000       0.101500       0.102200       0.016000
57906     57906     guizhou        106.0894       25.1750          139       144     2012      12        20        355              0.000000      15.497467       0.000000       0.243577   -9999.000000   -9999.000000       0.085500   -9999.000000
57906     57906     guizhou        106.0894       25.1750          139       144     2012      12        21        356              0.296167      16.542450       0.832315       0.242865       0.153000       0.228100   -9999.000000   -9999.000000
57906     57906     guizhou        106.0894       25.1750          139       144     2012      12        22        357              0.284417      13.215698       0.391350       0.243258       0.143000   -9999.000000   -9999.000000       0.072000
57906     57906     guizhou        106.0894       25.1750          139       144     2012      12        23        358              0.271667      12.254242       0.182947       0.243243       0.135500       0.261700   -9999.000000   -9999.000000
57906     57906     guizhou        106.0894       25.1750          139       144     2012      12        24        359              0.263211      10.574219       0.218383       0.242676       0.128000       0.180300       0.114100       0.040000
57906     57906     guizhou        106.0894       25.1750          139       144     2012      12        25        360              0.261000      12.702179       1.129050       0.242458   -9999.000000   -9999.000000       0.124300   -9999.000000
57906     57906     guizhou        106.0894       25.1750          139       144     2012      12        26        361              0.000000      11.388550       0.678470       0.247256       0.163000       0.420500       0.115800       0.172000
57906     57906     guizhou        106.0894       25.1750          139       144     2012      12        27        362              0.273429      10.508240       0.284574       0.251441       0.150000   -9999.000000   -9999.000000       0.018000
57906     57906     guizhou        106.0894       25.1750          139       144     2012      12        28        363              0.000000      10.626373       0.138479       0.250928       0.142000   -9999.000000   -9999.000000       0.108000
57906     57906     guizhou        106.0894       25.1750          139       144     2012      12        29        364              0.000000      11.934692       0.432444       0.250429       0.142000       0.386400       0.123200       0.078000
57906     57906     guizhou        106.0894       25.1750          139       144     2012      12        30        365              0.000000       9.245697       0.000000       0.249399   -9999.000000   -9999.000000       0.117700   -9999.000000
57906     57906     guizhou        106.0894       25.1750          139       144     2012      12        31        366              0.286000       7.120056       0.000000       0.247592   -9999.000000       0.207900       0.084200   -9999.000000
