# Supplementary material for: Research on Fusing Multisatellite Soil Moisture Data Based on Bayesian Model Averaging
Source: Hindawi journal article supplement (doi:10.1155/2018/9310838), 2018-06-25
Supplement: f1 [file 9310838.f1.zip › 2012_sm00-10cm_daily_ZDB_ZHY_57910_366days_allin.txt]

57910     57910     guizhou        106.0881       25.7683          137       144     2012      01        01        001              0.000000   -9999.000000       0.876376   -9999.000000       0.120000   -9999.000000   -9999.000000   -9999.000000
57910     57910     guizhou        106.0881       25.7683          137       144     2012      01        02        002              0.274143       5.383698       2.776529       0.257966   -9999.000000       0.018100   -9999.000000       0.349000
57910     57910     guizhou        106.0881       25.7683          137       144     2012      01        03        003              0.000000       5.727356       3.415787       0.269292   -9999.000000   -9999.000000       0.039600       0.154000
57910     57910     guizhou        106.0881       25.7683          137       144     2012      01        04        004              0.286222       4.227814       3.104415       0.274880   -9999.000000       0.012800       0.038800       0.142000
57910     57910     guizhou        106.0881       25.7683          137       144     2012      01        05        005              0.000000       2.655548       1.158024       0.267640       0.139000   -9999.000000       0.039400   -9999.000000
57910     57910     guizhou        106.0881       25.7683          137       144     2012      01        06        006              0.322000       2.317413       2.407596       0.258943       0.134000       0.014400   -9999.000000       0.284000
57910     57910     guizhou        106.0881       25.7683          137       144     2012      01        07        007              0.322000       3.503265       0.719989       0.266996   -9999.000000       0.155800   -9999.000000   -9999.000000
57910     57910     guizhou        106.0881       25.7683          137       144     2012      01        08        008              0.000000       3.633545       0.311449       0.267345   -9999.000000   -9999.000000   -9999.000000       0.273000
57910     57910     guizhou        106.0881       25.7683          137       144     2012      01        09        009              0.322000       3.975464       0.852765       0.265930       0.128000   -9999.000000   -9999.000000       0.413000
57910     57910     guizhou        106.0881       25.7683          137       144     2012      01        10        010              0.323846       4.656036       1.268314       0.266742       0.136500   -9999.000000       0.038400   -9999.000000
57910     57910     guizhou        106.0881       25.7683          137       144     2012      01        11        011              0.325000       4.698090       0.064094       0.269026       0.091000   -9999.000000       0.028700       0.185000
57910     57910     guizhou        106.0881       25.7683          137       144     2012      01        12        012              0.322632       5.258423       0.058956       0.265330       0.077000       0.115200   -9999.000000   -9999.000000
57910     57910     guizhou        106.0881       25.7683          137       144     2012      01        13        013              0.322000       7.340851       2.648303       0.263730   -9999.000000   -9999.000000   -9999.000000       0.365000
57910     57910     guizhou        106.0881       25.7683          137       144     2012      01        14        014              0.324778       7.663940       2.607444       0.267186   -9999.000000       0.011000   -9999.000000       0.456000
57910     57910     guizhou        106.0881       25.7683          137       144     2012      01        15        015              0.329000       5.680664       0.990462       0.275333       0.090000   -9999.000000       0.032500       0.370000
57910     57910     guizhou        106.0881       25.7683          137       144     2012      01        16        016              0.325000       6.018829       0.478392       0.272286       0.080500   -9999.000000       0.046400       0.298000
57910     57910     guizhou        106.0881       25.7683          137       144     2012      01        17        017              0.000000       8.250977       2.927872       0.266585       0.090000       0.015200       0.038000   -9999.000000
57910     57910     guizhou        106.0881       25.7683          137       144     2012      01        18        018              0.329000       5.413300       0.547702       0.274633   -9999.000000   -9999.000000   -9999.000000       0.366000
57910     57910     guizhou        106.0881       25.7683          137       144     2012      01        19        019              0.327947       5.918304       0.617195       0.268897   -9999.000000   -9999.000000   -9999.000000       0.292000
57910     57910     guizhou        106.0881       25.7683          137       144     2012      01        20        020              0.325000       6.926727       1.623086       0.267262       0.094000   -9999.000000       0.046200       0.440000
57910     57910     guizhou        106.0881       25.7683          137       144     2012      01        21        021              0.328765       6.210419       0.271239       0.269532       0.098000   -9999.000000       0.042400       0.275000
57910     57910     guizhou        106.0881       25.7683          137       144     2012      01        22        022              0.327667       4.215179       0.000000       0.265431       0.094000       0.111100       0.033800   -9999.000000
57910     57910     guizhou        106.0881       25.7683          137       144     2012      01        23        023              0.325000       3.121704       0.000000       0.257843   -9999.000000   -9999.000000   -9999.000000       0.228000
57910     57910     guizhou        106.0881       25.7683          137       144     2012      01        24        024              0.325000       3.459961       0.180149       0.256977   -9999.000000   -9999.000000   -9999.000000   -9999.000000
57910     57910     guizhou        106.0881       25.7683          137       144     2012      01        25        025              0.322000       3.318329       0.120696       0.253885       0.101000       0.034500   -9999.000000       0.232000
57910     57910     guizhou        106.0881       25.7683          137       144     2012      01        26        026              0.322000       4.353210       0.250037       0.256911       0.098000   -9999.000000       0.032200       0.234000
57910     57910     guizhou        106.0881       25.7683          137       144     2012      01        27        027              0.322000       3.561951       0.026743       0.258946       0.094500   -9999.000000       0.032200   -9999.000000
57910     57910     guizhou        106.0881       25.7683          137       144     2012      01        28        028              0.322000       4.151794       0.058151       0.259859       0.094000   -9999.000000       0.024400       0.319000
57910     57910     guizhou        106.0881       25.7683          137       144     2012      01        29        029              0.322000       5.333344       0.218551       0.259626   -9999.000000   -9999.000000   -9999.000000   -9999.000000
57910     57910     guizhou        106.0881       25.7683          137       144     2012      01        30        030              0.322000       4.269745       0.000000       0.259205       0.097000   -9999.000000   -9999.000000       0.263000
57910     57910     guizhou        106.0881       25.7683          137       144     2012      01        31        031              0.322000       4.663666       0.110535       0.258312       0.100000   -9999.000000   -9999.000000       0.263000
57910     57910     guizhou        106.0881       25.7683          137       144     2012      02        01        032              0.322000       4.511627       0.238171       0.258937       0.096500   -9999.000000       0.043600       0.235000
57910     57910     guizhou        106.0881       25.7683          137       144     2012      02        02        033              0.322000       6.119171       0.254043       0.259855       0.099000   -9999.000000       0.041900       0.301000
57910     57910     guizhou        106.0881       25.7683          137       144     2012      02        03        034              0.322000       4.913818       0.250437       0.260306   -9999.000000   -9999.000000       0.034700   -9999.000000
57910     57910     guizhou        106.0881       25.7683          137       144     2012      02        04        035              0.323615       7.531158       0.227643       0.258721   -9999.000000   -9999.000000   -9999.000000       0.401000
57910     57910     guizhou        106.0881       25.7683          137       144     2012      02        05        036              0.325000       8.091461       0.000000       0.260335       0.097000   -9999.000000   -9999.000000   -9999.000000
57910     57910     guizhou        106.0881       25.7683          137       144     2012      02        06        037              0.324824      10.335175       0.000000       0.259128       0.093000   -9999.000000       0.034000       0.303000
57910     57910     guizhou        106.0881       25.7683          137       144     2012      02        07        038              0.321818       9.833679       0.000000       0.256444       0.096000       0.071800       0.034400       0.241000
57910     57910     guizhou        106.0881       25.7683          137       144     2012      02        08        039              0.318000       8.826050       0.213792       0.254822   -9999.000000   -9999.000000       0.027200   -9999.000000
57910     57910     guizhou        106.0881       25.7683          137       144     2012      02        09        040              0.318000       5.184113       0.373311       0.256027   -9999.000000       0.012400   -9999.000000       0.201000
57910     57910     guizhou        106.0881       25.7683          137       144     2012      02        10        041              0.318000       5.073120       0.000000       0.257777       0.100000   -9999.000000   -9999.000000   -9999.000000
57910     57910     guizhou        106.0881       25.7683          137       144     2012      02        11        042              0.318000       4.325867       0.142660       0.255801       0.111000   -9999.000000   -9999.000000       0.167000
57910     57910     guizhou        106.0881       25.7683          137       144     2012      02        12        043              0.316333       4.830505       0.068820       0.257274       0.114000   -9999.000000       0.021200       0.210000
57910     57910     guizhou        106.0881       25.7683          137       144     2012      02        13        044              0.316000       8.872406       0.338864       0.257421   -9999.000000   -9999.000000       0.024300   -9999.000000
57910     57910     guizhou        106.0881       25.7683          137       144     2012      02        14        045              0.313524      12.025482       0.000000       0.257663   -9999.000000       0.110900   -9999.000000       0.138000
57910     57910     guizhou        106.0881       25.7683          137       144     2012      02        15        046              0.312000       9.122467       1.383877       0.255768       0.108000   -9999.000000   -9999.000000   -9999.000000
57910     57910     guizhou        106.0881       25.7683          137       144     2012      02        16        047              0.312000       6.930267       0.437685       0.255585       0.113000   -9999.000000   -9999.000000       0.243000
57910     57910     guizhou        106.0881       25.7683          137       144     2012      02        17        048              0.312000       7.199982       0.000000       0.255340       0.115000       0.056800   -9999.000000       0.113000
57910     57910     guizhou        106.0881       25.7683          137       144     2012      02        18        049              0.000000       4.986786       0.000000       0.255103       0.111000   -9999.000000       0.032000       0.059000
57910     57910     guizhou        106.0881       25.7683          137       144     2012      02        19        050              0.312000       4.236145       1.670353       0.253579   -9999.000000   -9999.000000       0.036700       0.299000
57910     57910     guizhou        106.0881       25.7683          137       144     2012      02        20        051              0.312000       5.601624       2.734103       0.257780       0.122000       0.061100       0.023900   -9999.000000
57910     57910     guizhou        106.0881       25.7683          137       144     2012      02        21        052              0.315048       6.983856       1.713257       0.267977       0.079500   -9999.000000   -9999.000000       0.498000
57910     57910     guizhou        106.0881       25.7683          137       144     2012      02        22        053              0.318000       8.993958       0.266663       0.271335       0.072500   -9999.000000   -9999.000000   -9999.000000
57910     57910     guizhou        106.0881       25.7683          137       144     2012      02        23        054              0.000000      10.750641       0.562435       0.263174       0.075500   -9999.000000       0.030200       0.208000
57910     57910     guizhou        106.0881       25.7683          137       144     2012      02        24        055              0.322200       9.910828       0.287062       0.261741   -9999.000000   -9999.000000       0.030300       0.271000
57910     57910     guizhou        106.0881       25.7683          137       144     2012      02        25        056              0.322000      10.199860       0.204422       0.260422   -9999.000000       0.046400       0.027000   -9999.000000
57910     57910     guizhou        106.0881       25.7683          137       144     2012      02        26        057              0.322000       7.727509       0.146548       0.258653       0.086000   -9999.000000   -9999.000000       0.087000
57910     57910     guizhou        106.0881       25.7683          137       144     2012      02        27        058              0.322158       5.410431       0.159409       0.256827       0.078000       0.046500   -9999.000000   -9999.000000
57910     57910     guizhou        106.0881       25.7683          137       144     2012      02        28        059              0.324143       6.119873       0.404523       0.256206       0.078000   -9999.000000   -9999.000000       0.235000
57910     57910     guizhou        106.0881       25.7683          137       144     2012      02        29        060              0.000000   -9999.000000       0.341793   -9999.000000   -9999.000000   -9999.000000   -9999.000000   -9999.000000
57910     57910     guizhou        106.0881       25.7683          137       144     2012      03        01        061              0.322750       5.603790       2.774041       0.257482   -9999.000000       0.187800       0.047900       0.111000
57910     57910     guizhou        106.0881       25.7683          137       144     2012      03        02        062              0.318727      11.382751       4.436897       0.260566       0.112500   -9999.000000       0.035800       0.390000
57910     57910     guizhou        106.0881       25.7683          137       144     2012      03        03        063              0.326000      10.059082       3.138931       0.271341       0.105000       0.079700   -9999.000000   -9999.000000
57910     57910     guizhou        106.0881       25.7683          137       144     2012      03        04        064              0.332000      12.391937       0.322319       0.273930       0.105000   -9999.000000   -9999.000000       0.417000
57910     57910     guizhou        106.0881       25.7683          137       144     2012      03        05        065              0.326304      13.274231       0.000000       0.268815   -9999.000000   -9999.000000       0.057000   -9999.000000
57910     57910     guizhou        106.0881       25.7683          137       144     2012      03        06        066              0.322857      16.326141       0.238385       0.258498   -9999.000000       0.048600       0.052700       0.311000
57910     57910     guizhou        106.0881       25.7683          137       144     2012      03        07        067              0.000000      12.668732       0.452156       0.255848       0.112000   -9999.000000       0.057900       0.286000
57910     57910     guizhou        106.0881       25.7683          137       144     2012      03        08        068              0.316182      12.078369       0.224969       0.254523       0.112000   -9999.000000   -9999.000000   -9999.000000
57910     57910     guizhou        106.0881       25.7683          137       144     2012      03        09        069              0.316000       8.011292       0.000000       0.254915       0.108500   -9999.000000   -9999.000000       0.107000
57910     57910     guizhou        106.0881       25.7683          137       144     2012      03        10        070              0.311364       7.997284       0.055247       0.254161       0.103000   -9999.000000   -9999.000000   -9999.000000
57910     57910     guizhou        106.0881       25.7683          137       144     2012      03        11        071              0.309348       9.771240       0.055762       0.252745   -9999.000000       0.122200       0.054500       0.213000
57910     57910     guizhou        106.0881       25.7683          137       144     2012      03        12        072              0.307000       9.401215       0.305021       0.252513   -9999.000000   -9999.000000       0.067700       0.126000
57910     57910     guizhou        106.0881       25.7683          137       144     2012      03        13        073              0.307000       7.872162       0.269066       0.254280       0.124000       0.128700       0.058100   -9999.000000
57910     57910     guizhou        106.0881       25.7683          137       144     2012      03        14        074              0.304333       9.912628       0.101777       0.253511       0.118500       0.143800   -9999.000000       0.214000
57910     57910     guizhou        106.0881       25.7683          137       144     2012      03        15        075              0.292417      11.584930       0.270794       0.253575       0.107000   -9999.000000   -9999.000000   -9999.000000
57910     57910     guizhou        106.0881       25.7683          137       144     2012      03        16        076              0.278000      18.184753       0.000000       0.248211   -9999.000000       0.128800   -9999.000000       0.394000
57910     57910     guizhou        106.0881       25.7683          137       144     2012      03        17        077              0.261250      19.117279       0.000000       0.245182   -9999.000000   -9999.000000       0.055400       0.361000
57910     57910     guizhou        106.0881       25.7683          137       144     2012      03        18        078              0.244087      20.917114       0.000000       0.240537       0.107000       0.142400       0.057800       0.227000
57910     57910     guizhou        106.0881       25.7683          137       144     2012      03        19        079              0.228917      21.998932       0.000000       0.237115       0.100500       0.091300       0.060900       0.525000
57910     57910     guizhou        106.0881       25.7683          137       144     2012      03        20        080              0.215417      23.130646       1.493525       0.231493       0.102500   -9999.000000   -9999.000000   -9999.000000
57910     57910     guizhou        106.0881       25.7683          137       144     2012      03        21        081              0.207900      24.395599       0.000000       0.228241   -9999.000000       0.070300   -9999.000000       0.509000
57910     57910     guizhou        106.0881       25.7683          137       144     2012      03        22        082              0.140133      23.578278       4.241953       0.226741   -9999.000000   -9999.000000       0.073800   -9999.000000
57910     57910     guizhou        106.0881       25.7683          137       144     2012      03        23        083              0.130000      21.256378       0.000000       0.238743       0.116500   -9999.000000       0.065300       0.155000
57910     57910     guizhou        106.0881       25.7683          137       144     2012      03        24        084              0.130000      11.966766       0.000000       0.241503       0.103000       0.035800       0.061000       0.180000
57910     57910     guizhou        106.0881       25.7683          137       144     2012      03        25        085              0.000000      16.466156       0.134182       0.233949       0.095000   -9999.000000   -9999.000000   -9999.000000
57910     57910     guizhou        106.0881       25.7683          137       144     2012      03        26        086              0.130000      18.938385       0.000000       0.230361       0.097000   -9999.000000   -9999.000000       0.270000
57910     57910     guizhou        106.0881       25.7683          137       144     2012      03        27        087              0.130000      17.280548      10.189483       0.231844   -9999.000000   -9999.000000   -9999.000000   -9999.000000
57910     57910     guizhou        106.0881       25.7683          137       144     2012      03        28        088              0.130000      17.662872       1.213071       0.253383       0.123000   -9999.000000       0.067700       0.524000
57910     57910     guizhou        106.0881       25.7683          137       144     2012      03        29        089              0.130000      16.364471       4.539701       0.268386       0.125500       0.134400       0.069000       0.749000
57910     57910     guizhou        106.0881       25.7683          137       144     2012      03        30        090              0.130667      16.234711       2.820252       0.271270       0.112500   -9999.000000       0.058300       0.506000
57910     57910     guizhou        106.0881       25.7683          137       144     2012      03        31        091              0.130167      14.792023       0.328424       0.268744       0.105000       0.027200   -9999.000000       0.581000
57910     57910     guizhou        106.0881       25.7683          137       144     2012      04        01        092              0.130000      14.858429       0.000000       0.261061   -9999.000000       0.234800   -9999.000000   -9999.000000
57910     57910     guizhou        106.0881       25.7683          137       144     2012      04        02        093              0.130000      19.200653       0.176718       0.251074   -9999.000000   -9999.000000   -9999.000000       0.202000
57910     57910     guizhou        106.0881       25.7683          137       144     2012      04        03        094              0.130000      22.840607       0.000000       0.243445       0.117000       0.109600       0.068500   -9999.000000
57910     57910     guizhou        106.0881       25.7683          137       144     2012      04        04        095              0.130000      21.416718       0.639115       0.241693       0.110500   -9999.000000       0.072700       0.475000
57910     57910     guizhou        106.0881       25.7683          137       144     2012      04        05        096              0.130000      22.235107       0.154744       0.239533       0.113500       0.118400       0.062400       0.364000
57910     57910     guizhou        106.0881       25.7683          137       144     2012      04        06        097              0.130000      20.987701       0.149987       0.235122   -9999.000000       0.143700   -9999.000000   -9999.000000
57910     57910     guizhou        106.0881       25.7683          137       144     2012      04        07        098              0.130000      17.580597       0.000000       0.234072   -9999.000000   -9999.000000   -9999.000000       0.141000
57910     57910     guizhou        106.0881       25.7683          137       144     2012      04        08        099              0.130333      15.692657       6.968617       0.235351       0.122500       0.196600       0.083900   -9999.000000
57910     57910     guizhou        106.0881       25.7683          137       144     2012      04        09        100              0.130348      16.314758       0.000000       0.256098       0.111500   -9999.000000       0.080100       0.502000
57910     57910     guizhou        106.0881       25.7683          137       144     2012      04        10        101              0.130000      19.108917       0.750965       0.255580       0.101500       0.184500       0.080300       0.405000
57910     57910     guizhou        106.0881       25.7683          137       144     2012      04        11        102              0.130000      23.017395       0.000000       0.243885   -9999.000000       0.271600   -9999.000000       0.248000
57910     57910     guizhou        106.0881       25.7683          137       144     2012      04        12        103              0.130000      25.011719       0.174917       0.234048   -9999.000000   -9999.000000   -9999.000000       0.147000
57910     57910     guizhou        106.0881       25.7683          137       144     2012      04        13        104              0.160333      23.736511       0.101162       0.226838       0.132000       0.132700   -9999.000000   -9999.000000
57910     57910     guizhou        106.0881       25.7683          137       144     2012      04        14        105              0.165417      17.201202       0.000000       0.229025       0.107500       0.103500       0.075700       0.395000
57910     57910     guizhou        106.0881       25.7683          137       144     2012      04        15        106              0.163583      20.715363       0.000000       0.229986       0.104500   -9999.000000       0.079300       0.385000
57910     57910     guizhou        106.0881       25.7683          137       144     2012      04        16        107              0.161167      21.727753       0.000000       0.225285       0.105000       0.062500       0.087300       0.262000
57910     57910     guizhou        106.0881       25.7683          137       144     2012      04        17        108              0.170292      21.313599       1.562736       0.224114   -9999.000000   -9999.000000   -9999.000000       0.590000
57910     57910     guizhou        106.0881       25.7683          137       144     2012      04        18        109              0.181000      23.376526       0.000000       0.226853       0.120000       0.151900   -9999.000000   -9999.000000
57910     57910     guizhou        106.0881       25.7683          137       144     2012      04        19        110              0.173500      21.540497       4.136743       0.225175       0.115500       0.129700   -9999.000000       0.382000
57910     57910     guizhou        106.0881       25.7683          137       144     2012      04        20        111              0.167708      21.975372       0.188740       0.243545       0.100000   -9999.000000       0.087600   -9999.000000
57910     57910     guizhou        106.0881       25.7683          137       144     2012      04        21        112              0.161875      22.630920      17.833324       0.231863       0.096000       0.171300       0.099500       0.286000
57910     57910     guizhou        106.0881       25.7683          137       144     2012      04        22        113              0.156833      23.741364       0.671240       0.258024   -9999.000000   -9999.000000   -9999.000000       0.351000
57910     57910     guizhou        106.0881       25.7683          137       144     2012      04        23        114              0.152458      24.148651       0.000000       0.265760   -9999.000000       0.196000   -9999.000000   -9999.000000
57910     57910     guizhou        106.0881       25.7683          137       144     2012      04        24        115              0.147542      25.974548       0.000000       0.243901       0.113000       0.202600   -9999.000000       0.553000
57910     57910     guizhou        106.0881       25.7683          137       144     2012      04        25        116              0.000000      27.244415       0.814062       0.229660       0.112500   -9999.000000       0.138400   -9999.000000
57910     57910     guizhou        106.0881       25.7683          137       144     2012      04        26        117              0.144292      20.864288       0.786743       0.228400       0.106500       0.170600       0.126500       0.324000
57910     57910     guizhou        106.0881       25.7683          137       144     2012      04        27        118              0.143708      23.226440       0.000000       0.226517   -9999.000000   -9999.000000       0.116000       0.228000
57910     57910     guizhou        106.0881       25.7683          137       144     2012      04        28        119              0.200875      25.794678       4.178051       0.219389   -9999.000000   -9999.000000   -9999.000000       0.236000
57910     57910     guizhou        106.0881       25.7683          137       144     2012      04        29        120              0.264083      26.780548       0.000000       0.229097       0.116000       0.101600   -9999.000000       0.569000
57910     57910     guizhou        106.0881       25.7683          137       144     2012      04        30        121              0.223958      27.308563       0.000000       0.223188       0.104000   -9999.000000   -9999.000000   -9999.000000
57910     57910     guizhou        106.0881       25.7683          137       144     2012      05        01        122              0.200208      28.822418       0.000000       0.206878       0.133500       0.151200       0.117600       0.252000
57910     57910     guizhou        106.0881       25.7683          137       144     2012      05        02        123              0.185792      27.922119       0.000000       0.199252   -9999.000000       0.120500       0.123700   -9999.000000
57910     57910     guizhou        106.0881       25.7683          137       144     2012      05        03        124              0.173917      26.013062       0.450252       0.200234   -9999.000000   -9999.000000       0.108300       0.330000
57910     57910     guizhou        106.0881       25.7683          137       144     2012      05        04        125              0.163375      28.353638       0.000000       0.192250       0.157000       0.149600   -9999.000000       0.389000
57910     57910     guizhou        106.0881       25.7683          137       144     2012      05        05        126              0.157625      25.873505       1.380620       0.191053       0.158000   -9999.000000   -9999.000000   -9999.000000
57910     57910     guizhou        106.0881       25.7683          137       144     2012      05        06        127              0.156750      25.806793       0.043453       0.196601       0.148000       0.128800   -9999.000000       0.119000
57910     57910     guizhou        106.0881       25.7683          137       144     2012      05        07        128              0.151417      27.073792       0.000000       0.202272   -9999.000000   -9999.000000       0.101900   -9999.000000
57910     57910     guizhou        106.0881       25.7683          137       144     2012      05        08        129              0.229522      27.943787      16.487255       0.193221   -9999.000000   -9999.000000       0.124800       0.908000
57910     57910     guizhou        106.0881       25.7683          137       144     2012      05        09        130              0.316292      27.235992      53.075394       0.243597   -9999.000000       0.316400       0.099400       0.713000
57910     57910     guizhou        106.0881       25.7683          137       144     2012      05        10        131              0.307583      27.151276       0.472760       0.317894       0.175500   -9999.000000   -9999.000000       0.582000
57910     57910     guizhou        106.0881       25.7683          137       144     2012      05        11        132              0.264833      24.997406       0.650200       0.319115       0.151500       0.150700   -9999.000000       0.420000
57910     57910     guizhou        106.0881       25.7683          137       144     2012      05        12        133              0.299833      27.052734      11.649755       0.275737       0.158000       0.250200       0.116200   -9999.000000
57910     57910     guizhou        106.0881       25.7683          137       144     2012      05        13        134              0.309958      23.678314      32.451473       0.293812   -9999.000000   -9999.000000       0.132000       0.443000
57910     57910     guizhou        106.0881       25.7683          137       144     2012      05        14        135              0.314125      22.622223       0.724454       0.310666   -9999.000000       0.243000       0.122000       0.616000
57910     57910     guizhou        106.0881       25.7683          137       144     2012      05        15        136              0.293125      20.210388       0.000000       0.304076       0.169500   -9999.000000   -9999.000000       0.410000
57910     57910     guizhou        106.0881       25.7683          137       144     2012      05        16        137              0.258917      21.362183       0.534712       0.276981       0.161000       0.179300   -9999.000000       0.571000
57910     57910     guizhou        106.0881       25.7683          137       144     2012      05        17        138              0.280625      23.485107       0.107522       0.266936       0.169000       0.388100   -9999.000000   -9999.000000
57910     57910     guizhou        106.0881       25.7683          137       144     2012      05        18        139              0.282667      21.711639      40.384979       0.264559   -9999.000000   -9999.000000       0.135400       0.441000
57910     57910     guizhou        106.0881       25.7683          137       144     2012      05        19        140              0.308750      24.695892       0.547772       0.303565   -9999.000000       0.320700       0.120300   -9999.000000
57910     57910     guizhou        106.0881       25.7683          137       144     2012      05        20        141              0.347250      25.336060      43.107559       0.313392       0.194000   -9999.000000       0.130900       0.851000
57910     57910     guizhou        106.0881       25.7683          137       144     2012      05        21        142              0.358458      23.762360      67.106979       0.327104       0.159000   -9999.000000   -9999.000000       0.848000
57910     57910     guizhou        106.0881       25.7683          137       144     2012      05        22        143              0.346000      23.906036       4.884692       0.327758       0.170000   -9999.000000   -9999.000000   -9999.000000
57910     57910     guizhou        106.0881       25.7683          137       144     2012      05        23        144              0.337833      21.255859       0.779311       0.326419   -9999.000000   -9999.000000   -9999.000000       0.761000
57910     57910     guizhou        106.0881       25.7683          137       144     2012      05        24        145              0.346042      20.372345       0.472702       0.304063   -9999.000000       0.492800       0.100500   -9999.000000
57910     57910     guizhou        106.0881       25.7683          137       144     2012      05        25        146              0.000000      20.138733       1.661480       0.296437       0.197000       0.186300       0.104900       0.714000
57910     57910     guizhou        106.0881       25.7683          137       144     2012      05        26        147              0.329208      19.234619       0.000000       0.293162       0.168000   -9999.000000       0.088500       0.784000
57910     57910     guizhou        106.0881       25.7683          137       144     2012      05        27        148              0.318042      21.899994       3.274184       0.286508       0.151000       0.358000   -9999.000000       0.587000
57910     57910     guizhou        106.0881       25.7683          137       144     2012      05        28        149              0.339500      23.799652       5.828902       0.286435       0.141000   -9999.000000   -9999.000000       0.736000
57910     57910     guizhou        106.0881       25.7683          137       144     2012      05        29        150              0.363583      24.171783      39.108841       0.289560   -9999.000000       0.268700       0.100400   -9999.000000
57910     57910     guizhou        106.0881       25.7683          137       144     2012      05        30        151              0.324625      21.449799       0.000000       0.326419   -9999.000000       0.266500       0.101900   -9999.000000
57910     57910     guizhou        106.0881       25.7683          137       144     2012      05        31        152              0.307625      21.321808       0.358389       0.298129       0.178000   -9999.000000       0.087600   -9999.000000
57910     57910     guizhou        106.0881       25.7683          137       144     2012      06        01        153              0.334375      21.631653       6.406719       0.292098       0.216000       0.224300   -9999.000000       0.796000
57910     57910     guizhou        106.0881       25.7683          137       144     2012      06        02        154              0.359083      19.718750       4.984937       0.297862       0.202500   -9999.000000   -9999.000000       0.937000
57910     57910     guizhou        106.0881       25.7683          137       144     2012      06        03        155              0.372417      20.344360      14.681003       0.299469   -9999.000000       0.226600   -9999.000000   -9999.000000
57910     57910     guizhou        106.0881       25.7683          137       144     2012      06        04        156              0.360625      20.299316       1.598956       0.306535   -9999.000000       0.180600       0.096100       0.741000
57910     57910     guizhou        106.0881       25.7683          137       144     2012      06        05        157              0.352042      20.361572       0.377338       0.300421       0.226500   -9999.000000       0.104100   -9999.000000
57910     57910     guizhou        106.0881       25.7683          137       144     2012      06        06        158              0.361125      22.817932      43.487583       0.291178       0.190000       0.377200       0.080000       0.836000
57910     57910     guizhou        106.0881       25.7683          137       144     2012      06        07        159              0.361958      24.661713      17.597450       0.314992       0.193000   -9999.000000   -9999.000000       1.000000
57910     57910     guizhou        106.0881       25.7683          137       144     2012      06        08        160              0.362125      22.469330       3.122973       0.335814   -9999.000000   -9999.000000   -9999.000000       0.668000
57910     57910     guizhou        106.0881       25.7683          137       144     2012      06        09        161              0.345875      24.018250       1.257592       0.313394   -9999.000000       0.327400       0.101200       0.818000
57910     57910     guizhou        106.0881       25.7683          137       144     2012      06        10        162              0.355542      25.788055       5.620345       0.302568       0.210000   -9999.000000       0.093700   -9999.000000
57910     57910     guizhou        106.0881       25.7683          137       144     2012      06        11        163              0.000000      25.288330       3.281538       0.299632       0.191500   -9999.000000       0.098800       0.672000
57910     57910     guizhou        106.0881       25.7683          137       144     2012      06        12        164              0.357708      24.276947       0.243831       0.297215       0.181000   -9999.000000   -9999.000000       0.762000
57910     57910     guizhou        106.0881       25.7683          137       144     2012      06        13        165              0.329750      21.984711       6.622150       0.292403       0.165000   -9999.000000   -9999.000000       0.634000
57910     57910     guizhou        106.0881       25.7683          137       144     2012      06        14        166              0.349417      24.765045       1.211178       0.291068   -9999.000000       0.227100   -9999.000000       0.775000
57910     57910     guizhou        106.0881       25.7683          137       144     2012      06        15        167              0.296708      24.145905       0.000000       0.291838       0.180000   -9999.000000       0.084900   -9999.000000
57910     57910     guizhou        106.0881       25.7683          137       144     2012      06        16        168              0.249917      24.014679       0.000000       0.280659       0.165000       0.236900       0.082300       0.558000
57910     57910     guizhou        106.0881       25.7683          137       144     2012      06        17        169              0.212042      24.691833       0.696203       0.274453       0.158500       0.213000       0.073300   -9999.000000
57910     57910     guizhou        106.0881       25.7683          137       144     2012      06        18        170              0.184042      26.109314      14.136769       0.271647       0.154000   -9999.000000   -9999.000000       0.895000
57910     57910     guizhou        106.0881       25.7683          137       144     2012      06        19        171              0.272667      24.708038       6.867431       0.289029   -9999.000000       0.433600   -9999.000000       0.966000
57910     57910     guizhou        106.0881       25.7683          137       144     2012      06        20        172              0.234750      21.023071       0.000000       0.301685   -9999.000000   -9999.000000   -9999.000000   -9999.000000
57910     57910     guizhou        106.0881       25.7683          137       144     2012      06        21        173              0.240833      24.782043      44.182739       0.280610       0.218000       0.425400       0.061200       0.668000
57910     57910     guizhou        106.0881       25.7683          137       144     2012      06        22        174              0.335182      24.068787      11.343128       0.307558       0.227500       0.241600       0.065400   -9999.000000
57910     57910     guizhou        106.0881       25.7683          137       144     2012      06        23        175              0.300750      21.679199       0.000000       0.315098       0.187000   -9999.000000       0.052300       0.619000
57910     57910     guizhou        106.0881       25.7683          137       144     2012      06        24        176              0.270500      23.588287       0.327579       0.296552   -9999.000000       0.243900   -9999.000000       0.660000
57910     57910     guizhou        106.0881       25.7683          137       144     2012      06        25        177              0.267708      24.798737       4.636064       0.293345   -9999.000000   -9999.000000   -9999.000000       0.923000
57910     57910     guizhou        106.0881       25.7683          137       144     2012      06        26        178              0.336375      25.403137       6.552670       0.295521       0.210500   -9999.000000       0.106900       0.816000
57910     57910     guizhou        106.0881       25.7683          137       144     2012      06        27        179              0.341542      24.550659      10.040895       0.300757       0.210000       0.345200       0.097200   -9999.000000
57910     57910     guizhou        106.0881       25.7683          137       144     2012      06        28        180              0.352417      25.125885       9.470042       0.301491       0.188000   -9999.000000       0.104900       0.742000
57910     57910     guizhou        106.0881       25.7683          137       144     2012      06        29        181              0.321333      24.883942       0.681208       0.304411   -9999.000000       0.299900   -9999.000000   -9999.000000
57910     57910     guizhou        106.0881       25.7683          137       144     2012      06        30        182              0.260667      26.691559       0.660305       0.292681   -9999.000000       0.247300   -9999.000000   -9999.000000
57910     57910     guizhou        106.0881       25.7683          137       144     2012      07        01        183              0.223292      27.798950       2.226004       0.284533       0.214000   -9999.000000   -9999.000000       0.968000
57910     57910     guizhou        106.0881       25.7683          137       144     2012      07        02        184              0.258833      25.967407       0.173768       0.285508       0.201000       0.237600       0.097800   -9999.000000
57910     57910     guizhou        106.0881       25.7683          137       144     2012      07        03        185              0.225625      25.835999       0.000000       0.279845       0.191500   -9999.000000       0.106300       0.412000
57910     57910     guizhou        106.0881       25.7683          137       144     2012      07        04        186              0.181167      25.721405       0.000000       0.275318       0.179000       0.289000       0.088000   -9999.000000
57910     57910     guizhou        106.0881       25.7683          137       144     2012      07        05        187              0.149792      26.406158       0.000000       0.271756   -9999.000000       0.151000   -9999.000000       0.558000
57910     57910     guizhou        106.0881       25.7683          137       144     2012      07        06        188              0.125000      27.040009       0.000000       0.269008   -9999.000000   -9999.000000   -9999.000000       0.616000
57910     57910     guizhou        106.0881       25.7683          137       144     2012      07        07        189              0.111250      27.512787       0.516354       0.266021   -9999.000000       0.354600   -9999.000000       0.428000
57910     57910     guizhou        106.0881       25.7683          137       144     2012      07        08        190              0.107208      26.939941       0.272950       0.265366       0.175000   -9999.000000       0.090400       0.368000
57910     57910     guizhou        106.0881       25.7683          137       144     2012      07        09        191              0.101125      27.001465       0.000000       0.263376       0.170500       0.100300       0.097700   -9999.000000
57910     57910     guizhou        106.0881       25.7683          137       144     2012      07        10        192              0.137917      27.564453       1.787596       0.260551   -9999.000000       0.198300       0.085700       0.530000
57910     57910     guizhou        106.0881       25.7683          137       144     2012      07        11        193              0.144958      28.511200       0.381571       0.260032   -9999.000000   -9999.000000   -9999.000000       0.642000
57910     57910     guizhou        106.0881       25.7683          137       144     2012      07        12        194              0.144458      28.650757      55.757599       0.259582       0.281000       0.176900   -9999.000000       0.435000
57910     57910     guizhou        106.0881       25.7683          137       144     2012      07        13        195              0.329833      26.860504      30.912979       0.292617       0.282000   -9999.000000       0.104900       1.000000
57910     57910     guizhou        106.0881       25.7683          137       144     2012      07        14        196              0.331583      24.096802       6.322262       0.324764       0.285000   -9999.000000       0.101300   -9999.000000
57910     57910     guizhou        106.0881       25.7683          137       144     2012      07        15        197              0.325667      25.947937      10.079337       0.303021   -9999.000000       0.157300       0.090900       0.765000
57910     57910     guizhou        106.0881       25.7683          137       144     2012      07        16        198              0.349778      26.645660      58.761387       0.301628   -9999.000000   -9999.000000   -9999.000000   -9999.000000
57910     57910     guizhou        106.0881       25.7683          137       144     2012      07        17        199              0.358417      24.419586      21.051105       0.384516       0.323000       0.324300   -9999.000000       1.000000
57910     57910     guizhou        106.0881       25.7683          137       144     2012      07        18        200              0.359083      23.945343      23.312780       0.371375       0.295000       0.335300   -9999.000000       1.000000
57910     57910     guizhou        106.0881       25.7683          137       144     2012      07        19        201              0.361542      24.329041      16.293058       0.339296       0.268000   -9999.000000       0.110600   -9999.000000
57910     57910     guizhou        106.0881       25.7683          137       144     2012      07        20        202              0.347542      24.945312       0.123979       0.328833       0.227000       0.327000       0.109900       0.701000
57910     57910     guizhou        106.0881       25.7683          137       144     2012      07        21        203              0.331292      26.823608       0.255042       0.311405   -9999.000000   -9999.000000       0.098300   -9999.000000
57910     57910     guizhou        106.0881       25.7683          137       144     2012      07        22        204              0.358917      27.771362      27.893732       0.298585   -9999.000000       0.337000   -9999.000000       0.971000
57910     57910     guizhou        106.0881       25.7683          137       144     2012      07        23        205              0.352000      25.307556       0.948647       0.324160       0.301000       0.281900   -9999.000000       0.740000
57910     57910     guizhou        106.0881       25.7683          137       144     2012      07        24        206              0.339000      24.830475       3.979017       0.302785       0.310500   -9999.000000   -9999.000000       0.861000
57910     57910     guizhou        106.0881       25.7683          137       144     2012      07        25        207              0.368500      23.826721      20.445232       0.300743       0.335500       0.353100       0.104300       0.799000
57910     57910     guizhou        106.0881       25.7683          137       144     2012      07        26        208              0.372458      24.532623      11.714062       0.318471   -9999.000000   -9999.000000       0.104100   -9999.000000
57910     57910     guizhou        106.0881       25.7683          137       144     2012      07        27        209              0.373167      25.186066      12.784480       0.314237   -9999.000000       0.452700       0.089300       0.822000
57910     57910     guizhou        106.0881       25.7683          137       144     2012      07        28        210              0.373667      25.244385      13.015129       0.313910       0.331000       0.239400   -9999.000000   -9999.000000
57910     57910     guizhou        106.0881       25.7683          137       144     2012      07        29        211              0.365750      24.726776       1.552872       0.314051       0.293500   -9999.000000   -9999.000000       0.698000
57910     57910     guizhou        106.0881       25.7683          137       144     2012      07        30        212              0.346625      25.897339       1.059432       0.303510       0.284000       0.242800       0.138000       0.772000
57910     57910     guizhou        106.0881       25.7683          137       144     2012      07        31        213              0.334333      26.443237       6.594539       0.296151       0.258000   -9999.000000       0.130400   -9999.000000
57910     57910     guizhou        106.0881       25.7683          137       144     2012      08        01        214              0.346917      27.174835      11.474732       0.293333   -9999.000000       0.104600       0.130100       0.529000
57910     57910     guizhou        106.0881       25.7683          137       144     2012      08        02        215              0.351333      26.344818       0.940351       0.307860   -9999.000000       0.311800   -9999.000000   -9999.000000
57910     57910     guizhou        106.0881       25.7683          137       144     2012      08        03        216              0.336792      26.826599       0.000000       0.289557       0.373500   -9999.000000   -9999.000000       0.520000
57910     57910     guizhou        106.0881       25.7683          137       144     2012      08        04        217              0.308792      27.358429       0.000000       0.281645       0.346000       0.215500   -9999.000000       0.576000
57910     57910     guizhou        106.0881       25.7683          137       144     2012      08        05        218              0.264208      27.912567       4.976864       0.275348       0.358000       0.395600       0.133500       0.435000
57910     57910     guizhou        106.0881       25.7683          137       144     2012      08        06        219              0.295167      27.892975       4.887854       0.271819   -9999.000000   -9999.000000       0.140500       0.592000
57910     57910     guizhou        106.0881       25.7683          137       144     2012      08        07        220              0.328208      24.963745       2.767673       0.284187   -9999.000000       0.261800       0.127600   -9999.000000
57910     57910     guizhou        106.0881       25.7683          137       144     2012      08        08        221              0.324000      24.892883       0.588997       0.281072       0.403500   -9999.000000   -9999.000000       0.474000
57910     57910     guizhou        106.0881       25.7683          137       144     2012      08        09        222              0.296667      27.302643       0.000000       0.272130       0.366500       0.208600   -9999.000000       0.526000
57910     57910     guizhou        106.0881       25.7683          137       144     2012      08        10        223              0.245083      27.719452       0.000000       0.266697       0.347000       0.218000       0.136800       0.430000
57910     57910     guizhou        106.0881       25.7683          137       144     2012      08        11        224              0.195000      27.785828       0.161655       0.262903   -9999.000000   -9999.000000       0.130600       0.580000
57910     57910     guizhou        106.0881       25.7683          137       144     2012      08        12        225              0.164542      28.126190       0.000000       0.259380   -9999.000000       0.197600       0.134000   -9999.000000
57910     57910     guizhou        106.0881       25.7683          137       144     2012      08        13        226              0.149292      28.476349       4.418326       0.257236       0.243000   -9999.000000   -9999.000000       0.434000
57910     57910     guizhou        106.0881       25.7683          137       144     2012      08        14        227              0.164458      28.071136       4.401106       0.266425       0.225500       0.147200   -9999.000000   -9999.000000
57910     57910     guizhou        106.0881       25.7683          137       144     2012      08        15        228              0.169667      27.890411       3.581883       0.274853       0.229000       0.204600   -9999.000000       0.570000
57910     57910     guizhou        106.0881       25.7683          137       144     2012      08        16        229              0.152167      28.009491       0.714206       0.272618       0.201000   -9999.000000       0.115100       0.525000
57910     57910     guizhou        106.0881       25.7683          137       144     2012      08        17        230              0.139042      28.639496       7.831448       0.264036   -9999.000000       0.181500       0.126900   -9999.000000
57910     57910     guizhou        106.0881       25.7683          137       144     2012      08        18        231              0.144458      27.490387       2.210258       0.278440   -9999.000000   -9999.000000       0.114200       0.640000
57910     57910     guizhou        106.0881       25.7683          137       144     2012      08        19        232              0.151917      24.685150       0.685112       0.274711       0.252000       0.120100   -9999.000000   -9999.000000
57910     57910     guizhou        106.0881       25.7683          137       144     2012      08        20        233              0.159750      26.435333      30.145208       0.264053       0.232000       0.404800   -9999.000000       0.453000
57910     57910     guizhou        106.0881       25.7683          137       144     2012      08        21        234              0.320458      27.362946       3.031271       0.286141       0.240500   -9999.000000   -9999.000000       0.743000
57910     57910     guizhou        106.0881       25.7683          137       144     2012      08        22        235              0.303667      24.939117       0.000000       0.305458   -9999.000000       0.204100       0.110800   -9999.000000
57910     57910     guizhou        106.0881       25.7683          137       144     2012      08        23        236              0.286500      23.795135       0.000000       0.277084   -9999.000000       0.273900       0.124600       0.499000
57910     57910     guizhou        106.0881       25.7683          137       144     2012      08        24        237              0.261542      23.878693       0.000000       0.267432   -9999.000000   -9999.000000       0.103700   -9999.000000
57910     57910     guizhou        106.0881       25.7683          137       144     2012      08        25        238              0.000000      25.131470       0.000000       0.261423       0.248500       0.241600   -9999.000000       0.322000
57910     57910     guizhou        106.0881       25.7683          137       144     2012      08        26        239              0.197333      25.397614       0.000000       0.259616       0.236500   -9999.000000   -9999.000000   -9999.000000
57910     57910     guizhou        106.0881       25.7683          137       144     2012      08        27        240              0.175833      25.156158       1.616307       0.257397       0.222000       0.155600       0.085100       0.377000
57910     57910     guizhou        106.0881       25.7683          137       144     2012      08        28        241              0.163375      25.109741       1.191378       0.255757   -9999.000000       0.236000       0.077200       0.498000
57910     57910     guizhou        106.0881       25.7683          137       144     2012      08        29        242              0.157833      26.174469      11.555728       0.253082   -9999.000000   -9999.000000       0.087400   -9999.000000
57910     57910     guizhou        106.0881       25.7683          137       144     2012      08        30        243              0.151917      26.239227       0.000000       0.284572       0.256500       0.203000   -9999.000000       0.273000
57910     57910     guizhou        106.0881       25.7683          137       144     2012      08        31        244              0.141708      27.080994       0.198121       0.263667       0.254000   -9999.000000   -9999.000000   -9999.000000
57910     57910     guizhou        106.0881       25.7683          137       144     2012      09        01        245              0.133583      26.990479      14.859629       0.256513       0.247500       0.157700   -9999.000000       0.330000
57910     57910     guizhou        106.0881       25.7683          137       144     2012      09        02        246              0.235750      26.504761       5.763134       0.264905   -9999.000000       0.208700       0.080600       0.698000
57910     57910     guizhou        106.0881       25.7683          137       144     2012      09        03        247              0.240000      23.015472       0.000000       0.290652   -9999.000000   -9999.000000       0.136400       0.250000
57910     57910     guizhou        106.0881       25.7683          137       144     2012      09        04        248              0.226583      23.109985       0.000000       0.268978       0.267000       0.224700       0.117100       0.228000
57910     57910     guizhou        106.0881       25.7683          137       144     2012      09        05        249              0.204125      23.971649       0.000000       0.258491       0.255500   -9999.000000   -9999.000000   -9999.000000
57910     57910     guizhou        106.0881       25.7683          137       144     2012      09        06        250              0.179917      24.470947       0.398262       0.253756       0.263500       0.224200   -9999.000000       0.273000
57910     57910     guizhou        106.0881       25.7683          137       144     2012      09        07        251              0.217917      25.429199       0.473814       0.250522       0.235000       0.276700   -9999.000000       0.425000
57910     57910     guizhou        106.0881       25.7683          137       144     2012      09        08        252              0.232875      25.912903       5.838566       0.248219   -9999.000000   -9999.000000       0.125400       0.219000
57910     57910     guizhou        106.0881       25.7683          137       144     2012      09        09        253              0.222208      26.194305       1.838956       0.245613       0.275000       0.195900       0.139800       0.466000
57910     57910     guizhou        106.0881       25.7683          137       144     2012      09        10        254              0.213417      26.514679       0.000000       0.245917       0.255500       0.129500       0.093900   -9999.000000
57910     57910     guizhou        106.0881       25.7683          137       144     2012      09        11        255              0.207292      26.005493      37.374058       0.247859       0.162000   -9999.000000   -9999.000000       0.375000
57910     57910     guizhou        106.0881       25.7683          137       144     2012      09        12        256              0.388375      25.161133      10.215900       0.276690       0.185000       0.294500   -9999.000000   -9999.000000
57910     57910     guizhou        106.0881       25.7683          137       144     2012      09        13        257              0.419125      21.448486       5.323878       0.307877   -9999.000000   -9999.000000       0.108500       0.442000
57910     57910     guizhou        106.0881       25.7683          137       144     2012      09        14        258              0.402458      19.637482       0.000000       0.295748   -9999.000000       0.232000       0.101900       0.565000
57910     57910     guizhou        106.0881       25.7683          137       144     2012      09        15        259              0.386792      21.539124       0.000000       0.275701       0.165500       0.249700       0.107800   -9999.000000
57910     57910     guizhou        106.0881       25.7683          137       144     2012      09        16        260              0.372500      22.185272       0.764191       0.267966       0.173500   -9999.000000   -9999.000000       0.430000
57910     57910     guizhou        106.0881       25.7683          137       144     2012      09        17        261              0.363500      21.103088       0.265549       0.266642       0.182500       0.254500   -9999.000000   -9999.000000
57910     57910     guizhou        106.0881       25.7683          137       144     2012      09        18        262              0.360000      19.884613       1.744480       0.266976   -9999.000000   -9999.000000   -9999.000000       0.311000
57910     57910     guizhou        106.0881       25.7683          137       144     2012      09        19        263              0.359625      18.783264       1.000405       0.268121   -9999.000000       0.380400       0.067100       0.574000
57910     57910     guizhou        106.0881       25.7683          137       144     2012      09        20        264              0.362833      19.116577       8.018841       0.272449       0.202000       0.143400       0.084700       0.475000
57910     57910     guizhou        106.0881       25.7683          137       144     2012      09        21        265              0.425632      19.539612       8.186550       0.277133   -9999.000000   -9999.000000       0.062600       0.958000
57910     57910     guizhou        106.0881       25.7683          137       144     2012      09        22        266              0.432042      19.471222       3.340976       0.296692       0.184500       0.184900   -9999.000000   -9999.000000
57910     57910     guizhou        106.0881       25.7683          137       144     2012      09        23        267              0.439500      20.510803       1.636156       0.282191       0.173000   -9999.000000   -9999.000000       0.542000
57910     57910     guizhou        106.0881       25.7683          137       144     2012      09        24        268              0.447522      20.369720       2.566034       0.282787   -9999.000000       0.140400   -9999.000000   -9999.000000
57910     57910     guizhou        106.0881       25.7683          137       144     2012      09        25        269              0.435625      20.278748       0.310280       0.281534   -9999.000000       0.359300       0.075600       0.554000
57910     57910     guizhou        106.0881       25.7683          137       144     2012      09        26        270              0.436417      21.280396       1.095691       0.273944       0.174500   -9999.000000       0.081100       0.699000
57910     57910     guizhou        106.0881       25.7683          137       144     2012      09        27        271              0.433500      21.474915       0.232611       0.274265       0.173000       0.424800       0.070100   -9999.000000
57910     57910     guizhou        106.0881       25.7683          137       144     2012      09        28        272              0.414933      21.118958       0.164628       0.270151       0.156000   -9999.000000   -9999.000000       0.376000
57910     57910     guizhou        106.0881       25.7683          137       144     2012      09        29        273              0.405875      21.458374       3.647732       0.266654   -9999.000000   -9999.000000   -9999.000000   -9999.000000
57910     57910     guizhou        106.0881       25.7683          137       144     2012      09        30        274              0.393042      22.581085       0.000000       0.261235   -9999.000000       0.476600       0.069400       0.381000
57910     57910     guizhou        106.0881       25.7683          137       144     2012      10        01        275              0.372042      21.586487       0.314989       0.260172       0.115000   -9999.000000       0.043700       0.429000
57910     57910     guizhou        106.0881       25.7683          137       144     2012      10        02        276              0.341917      22.837311       0.000000       0.258226       0.102500       0.323000       0.042100       0.378000
57910     57910     guizhou        106.0881       25.7683          137       144     2012      10        03        277              0.326944      22.757446       5.047555       0.256681       0.114000       0.125100   -9999.000000       0.387000
57910     57910     guizhou        106.0881       25.7683          137       144     2012      10        04        278              0.347375      19.615417       9.481913       0.270039       0.112000   -9999.000000   -9999.000000   -9999.000000
57910     57910     guizhou        106.0881       25.7683          137       144     2012      10        05        279              0.454500      18.905060       5.363356       0.286501   -9999.000000       0.435000   -9999.000000       0.829000
57910     57910     guizhou        106.0881       25.7683          137       144     2012      10        06        280              0.441818      18.356750       1.348832       0.293076       0.122000   -9999.000000       0.048800       0.665000
57910     57910     guizhou        106.0881       25.7683          137       144     2012      10        07        281              0.431500      18.470337       0.000000       0.277001       0.117000       0.218900       0.051800       0.449000
57910     57910     guizhou        106.0881       25.7683          137       144     2012      10        08        282              0.424708      20.171112       2.009890       0.271061       0.114000       0.288300       0.038300       0.612000
57910     57910     guizhou        106.0881       25.7683          137       144     2012      10        09        283              0.419818      20.572937       1.082695       0.270605       0.113000   -9999.000000   -9999.000000   -9999.000000
57910     57910     guizhou        106.0881       25.7683          137       144     2012      10        10        284              0.431750      17.983124       0.000000       0.274680   -9999.000000       0.201300   -9999.000000       0.445000
57910     57910     guizhou        106.0881       25.7683          137       144     2012      10        11        285              0.429375      18.531647       0.563881       0.268699   -9999.000000   -9999.000000   -9999.000000   -9999.000000
57910     57910     guizhou        106.0881       25.7683          137       144     2012      10        12        286              0.430750      19.301666      10.364324       0.268092       0.216500       0.179100       0.048000   -9999.000000
57910     57910     guizhou        106.0881       25.7683          137       144     2012      10        13        287              0.454435      20.091949       2.639210       0.278541       0.198500       0.277000       0.048400       0.812000
57910     57910     guizhou        106.0881       25.7683          137       144     2012      10        14        288              0.455522      18.149078       0.000000       0.287748       0.180500   -9999.000000       0.040000   -9999.000000
57910     57910     guizhou        106.0881       25.7683          137       144     2012      10        15        289              0.452083      19.472168       0.000000       0.275351   -9999.000000       0.201600   -9999.000000       0.545000
57910     57910     guizhou        106.0881       25.7683          137       144     2012      10        16        290              0.446000      23.081207       0.487181       0.268493   -9999.000000   -9999.000000   -9999.000000   -9999.000000
57910     57910     guizhou        106.0881       25.7683          137       144     2012      10        17        291              0.439458      20.575317       0.000000       0.265853       0.177000   -9999.000000       0.059300       0.391000
57910     57910     guizhou        106.0881       25.7683          137       144     2012      10        18        292              0.437125      19.553925       1.855868       0.260689       0.179000       0.174800       0.064900       0.413000
57910     57910     guizhou        106.0881       25.7683          137       144     2012      10        19        293              0.428208      21.075073       0.000000       0.258066       0.170500   -9999.000000       0.058100       0.383000
57910     57910     guizhou        106.0881       25.7683          137       144     2012      10        20        294              0.416500      21.003845       0.000000       0.258651       0.155000       0.373400   -9999.000000       0.541000
57910     57910     guizhou        106.0881       25.7683          137       144     2012      10        21        295              0.399875      22.648743       0.177930       0.256384   -9999.000000       0.171600   -9999.000000   -9999.000000
57910     57910     guizhou        106.0881       25.7683          137       144     2012      10        22        296              0.379708      22.961426       0.660120       0.254290   -9999.000000   -9999.000000   -9999.000000       0.288000
57910     57910     guizhou        106.0881       25.7683          137       144     2012      10        23        297              0.361417      21.037964       0.000000       0.256071   -9999.000000       0.304000       0.069100   -9999.000000
57910     57910     guizhou        106.0881       25.7683          137       144     2012      10        24        298              0.350542      21.368347       2.803542       0.254185   -9999.000000   -9999.000000       0.073700       0.375000
57910     57910     guizhou        106.0881       25.7683          137       144     2012      10        25        299              0.000000      17.843414       0.000000       0.264121       0.132000       0.201800       0.063900       0.472000
57910     57910     guizhou        106.0881       25.7683          137       144     2012      10        26        300              0.322625      20.774078       1.199270       0.257063   -9999.000000       0.129500   -9999.000000   -9999.000000
57910     57910     guizhou        106.0881       25.7683          137       144     2012      10        27        301              0.311167      21.250977       0.275111       0.255088   -9999.000000   -9999.000000   -9999.000000       0.301000
57910     57910     guizhou        106.0881       25.7683          137       144     2012      10        28        302              0.000000      19.976318       2.987490       0.256182       0.158500       0.266700       0.080500   -9999.000000
57910     57910     guizhou        106.0881       25.7683          137       144     2012      10        29        303              0.364125      19.631775      18.302126       0.264065       0.143000   -9999.000000       0.108800       0.878000
57910     57910     guizhou        106.0881       25.7683          137       144     2012      10        30        304              0.459056      19.365479       2.111515       0.289817       0.147000       0.214900       0.109600       0.674000
57910     57910     guizhou        106.0881       25.7683          137       144     2012      10        31        305              0.449667      15.322876       0.000000       0.288812       0.126000       0.205600   -9999.000000       0.286000
57910     57910     guizhou        106.0881       25.7683          137       144     2012      11        01        306              0.444083      17.055145       0.000000       0.271925   -9999.000000   -9999.000000   -9999.000000       0.278000
57910     57910     guizhou        106.0881       25.7683          137       144     2012      11        02        307              0.436875      16.931580       0.355240       0.265888       0.157000       0.190400   -9999.000000   -9999.000000
57910     57910     guizhou        106.0881       25.7683          137       144     2012      11        03        308              0.431000      18.307617       0.000000       0.262120       0.153500   -9999.000000       0.099200       0.396000
57910     57910     guizhou        106.0881       25.7683          137       144     2012      11        04        309              0.424542      17.141937       0.000000       0.261524       0.150500   -9999.000000       0.116800       0.396000
57910     57910     guizhou        106.0881       25.7683          137       144     2012      11        05        310              0.420000      17.733032       8.814426       0.259565       0.165500       0.374700       0.117900       0.869000
57910     57910     guizhou        106.0881       25.7683          137       144     2012      11        06        311              0.474929      15.835968       2.906746       0.276061   -9999.000000   -9999.000000   -9999.000000       0.525000
57910     57910     guizhou        106.0881       25.7683          137       144     2012      11        07        312              0.477000      14.215851       2.228479       0.283948   -9999.000000       0.249000   -9999.000000   -9999.000000
57910     57910     guizhou        106.0881       25.7683          137       144     2012      11        08        313              0.471565      13.623688       0.826165       0.280691       0.184000       0.399400   -9999.000000       0.687000
57910     57910     guizhou        106.0881       25.7683          137       144     2012      11        09        314              0.469458      13.861176       0.000000       0.274143       0.150000   -9999.000000       0.118300   -9999.000000
57910     57910     guizhou        106.0881       25.7683          137       144     2012      11        10        315              0.461000      18.277771       0.412799       0.268438       0.149000       0.314600       0.125100       0.361000
57910     57910     guizhou        106.0881       25.7683          137       144     2012      11        11        316              0.455625      16.527649       0.000000       0.264226   -9999.000000   -9999.000000       0.112600       0.292000
57910     57910     guizhou        106.0881       25.7683          137       144     2012      11        12        317              0.449125      13.745087       0.000000       0.263325   -9999.000000       0.272600   -9999.000000   -9999.000000
57910     57910     guizhou        106.0881       25.7683          137       144     2012      11        13        318              0.000000      14.270538       0.000000       0.262549       0.116000       0.237200   -9999.000000       0.297000
57910     57910     guizhou        106.0881       25.7683          137       144     2012      11        14        319              0.441333      16.093567       0.000000       0.261458       0.104500   -9999.000000       0.124600   -9999.000000
57910     57910     guizhou        106.0881       25.7683          137       144     2012      11        15        320              0.435167      17.578857       1.052256       0.260646       0.108000       0.235700       0.124200       0.498000
57910     57910     guizhou        106.0881       25.7683          137       144     2012      11        16        321              0.476636      19.494812      12.020028       0.260942   -9999.000000   -9999.000000       0.116200       0.759000
57910     57910     guizhou        106.0881       25.7683          137       144     2012      11        17        322              0.000000      13.312592       0.000000       0.292910   -9999.000000       0.217900   -9999.000000       0.341000
57910     57910     guizhou        106.0881       25.7683          137       144     2012      11        18        323              0.464375      15.066498       0.106115       0.270826   -9999.000000       0.196200   -9999.000000       0.366000
57910     57910     guizhou        106.0881       25.7683          137       144     2012      11        19        324              0.462000      16.432098       0.884978       0.265225       0.131500   -9999.000000   -9999.000000   -9999.000000
57910     57910     guizhou        106.0881       25.7683          137       144     2012      11        20        325              0.460875      14.871063       0.000000       0.265149       0.117500       0.305300       0.114100       0.374000
57910     57910     guizhou        106.0881       25.7683          137       144     2012      11        21        326              0.456500      17.971008       0.000000       0.262774       0.102000   -9999.000000       0.117900   -9999.000000
57910     57910     guizhou        106.0881       25.7683          137       144     2012      11        22        327              0.449958      17.608093       0.000000       0.260324   -9999.000000   -9999.000000       0.105500       0.265000
57910     57910     guizhou        106.0881       25.7683          137       144     2012      11        23        328              0.445000      15.243988       0.422472       0.258908   -9999.000000       0.471100   -9999.000000       0.314000
57910     57910     guizhou        106.0881       25.7683          137       144     2012      11        24        329              0.444000      12.414459       0.090166       0.259391       0.117500   -9999.000000   -9999.000000   -9999.000000
57910     57910     guizhou        106.0881       25.7683          137       144     2012      11        25        330              0.439083      12.299652       0.000000       0.261091       0.111500       0.241900   -9999.000000       0.056000
57910     57910     guizhou        106.0881       25.7683          137       144     2012      11        26        331              0.433500      14.174988       0.000000       0.257756       0.108000       0.148600   -9999.000000   -9999.000000
57910     57910     guizhou        106.0881       25.7683          137       144     2012      11        27        332              0.432000      10.882721       0.767225       0.256172       0.105000   -9999.000000       0.092300       0.186000
57910     57910     guizhou        106.0881       25.7683          137       144     2012      11        28        333              0.429316      10.495483       0.728782       0.259366   -9999.000000       0.380800       0.075600       0.252000
57910     57910     guizhou        106.0881       25.7683          137       144     2012      11        29        334              0.429000       9.797974       0.831429       0.261030       0.120000   -9999.000000   -9999.000000       0.401000
57910     57910     guizhou        106.0881       25.7683          137       144     2012      11        30        335              0.429714      10.855804       1.949093       0.264424       0.125500       0.205500   -9999.000000       0.338000
57910     57910     guizhou        106.0881       25.7683          137       144     2012      12        01        336              0.438810      10.791229       0.555198       0.266349       0.139000       0.192700       0.080000   -9999.000000
57910     57910     guizhou        106.0881       25.7683          137       144     2012      12        02        337              0.439583       9.457581       0.000000       0.264223       0.119000   -9999.000000       0.090500       0.250000
57910     57910     guizhou        106.0881       25.7683          137       144     2012      12        03        338              0.435000      11.946472       0.000000       0.260037   -9999.000000       0.303300       0.086900       0.224000
57910     57910     guizhou        106.0881       25.7683          137       144     2012      12        04        339              0.435000      10.490875       0.166209       0.259231   -9999.000000   -9999.000000   -9999.000000       0.155000
57910     57910     guizhou        106.0881       25.7683          137       144     2012      12        05        340              0.432261       9.473022       0.000000       0.260003       0.137500       0.221900   -9999.000000       0.239000
57910     57910     guizhou        106.0881       25.7683          137       144     2012      12        06        341              0.430625      10.556335       0.000000       0.257326       0.128000       0.179900   -9999.000000   -9999.000000
57910     57910     guizhou        106.0881       25.7683          137       144     2012      12        07        342              0.429000      12.161072       0.000000       0.255774       0.135500   -9999.000000       0.095000       0.179000
57910     57910     guizhou        106.0881       25.7683          137       144     2012      12        08        343              0.425250      11.781403       0.952825       0.256087   -9999.000000       0.145900       0.113900   -9999.000000
57910     57910     guizhou        106.0881       25.7683          137       144     2012      12        09        344              0.425000      10.537109       3.287093       0.258566   -9999.000000   -9999.000000       0.095900       0.477000
57910     57910     guizhou        106.0881       25.7683          137       144     2012      12        10        345              0.434143       9.784485       0.174423       0.270198       0.144000   -9999.000000   -9999.000000       0.406000
57910     57910     guizhou        106.0881       25.7683          137       144     2012      12        11        346              0.435000       8.660614       0.337421       0.266266       0.140500       0.259000   -9999.000000   -9999.000000
57910     57910     guizhou        106.0881       25.7683          137       144     2012      12        12        347              0.435000       9.932617       0.159884       0.262854       0.138000   -9999.000000       0.106400       0.290000
57910     57910     guizhou        106.0881       25.7683          137       144     2012      12        13        348              0.436304       9.651550       0.000000       0.262674       0.115000       0.247300       0.098600   -9999.000000
57910     57910     guizhou        106.0881       25.7683          137       144     2012      12        14        349              0.435000      14.681671       0.000000       0.259771   -9999.000000       0.207800       0.107200       0.238000
57910     57910     guizhou        106.0881       25.7683          137       144     2012      12        15        350              0.000000      16.427979       0.000000       0.255716   -9999.000000   -9999.000000   -9999.000000       0.308000
57910     57910     guizhou        106.0881       25.7683          137       144     2012      12        16        351              0.432000      16.337463       0.000000       0.253236       0.126000       0.324600   -9999.000000       0.113000
57910     57910     guizhou        106.0881       25.7683          137       144     2012      12        17        352              0.431125      14.900116       0.000000       0.253455       0.126000   -9999.000000   -9999.000000       0.196000
57910     57910     guizhou        106.0881       25.7683          137       144     2012      12        18        353              0.429000      11.324799       0.000000       0.253722       0.126500       0.144300       0.079000   -9999.000000
57910     57910     guizhou        106.0881       25.7683          137       144     2012      12        19        354              0.425833       9.979248       0.138134       0.253173   -9999.000000       0.066700       0.090800       0.061000
57910     57910     guizhou        106.0881       25.7683          137       144     2012      12        20        355              0.000000      10.909607       0.240843       0.253378   -9999.000000   -9999.000000       0.074700   -9999.000000
57910     57910     guizhou        106.0881       25.7683          137       144     2012      12        21        356              0.417130       9.494781       0.800545       0.254836       0.149000       0.195600   -9999.000000       0.013000
57910     57910     guizhou        106.0881       25.7683          137       144     2012      12        22        357              0.412182       8.153809       0.029242       0.254272       0.138500   -9999.000000   -9999.000000       0.057000
57910     57910     guizhou        106.0881       25.7683          137       144     2012      12        23        358              0.405957       6.386017       0.000000       0.254457       0.129000       0.192700   -9999.000000   -9999.000000
57910     57910     guizhou        106.0881       25.7683          137       144     2012      12        24        359              0.401474       5.687592       0.000000       0.254073       0.112000       0.224700       0.090500       0.182000
57910     57910     guizhou        106.0881       25.7683          137       144     2012      12        25        360              0.400000       9.350281       1.005070       0.252858   -9999.000000   -9999.000000       0.102700   -9999.000000
57910     57910     guizhou        106.0881       25.7683          137       144     2012      12        26        361              0.000000       7.055267       1.162145       0.257590       0.147000       0.410100       0.089800       0.098000
57910     57910     guizhou        106.0881       25.7683          137       144     2012      12        27        362              0.400000       5.752777       0.869772       0.260788       0.141000   -9999.000000   -9999.000000       0.077000
57910     57910     guizhou        106.0881       25.7683          137       144     2012      12        28        363              0.000000       6.957306       0.668386       0.261154       0.133000       0.116200   -9999.000000       0.186000
57910     57910     guizhou        106.0881       25.7683          137       144     2012      12        29        364              0.000000       8.334015       0.000000       0.262720       0.133000       0.214700       0.099800       0.209000
57910     57910     guizhou        106.0881       25.7683          137       144     2012      12        30        365              0.000000       4.554169       2.985747       0.254997   -9999.000000   -9999.000000       0.090400   -9999.000000
57910     57910     guizhou        106.0881       25.7683          137       144     2012      12        31        366              0.404000       2.917084       0.000000       0.248797   -9999.000000       0.227100       0.073000   -9999.000000
