# Supplementary material for: Research on Fusing Multisatellite Soil Moisture Data Based on Bayesian Model Averaging
Source: Hindawi journal article supplement (doi:10.1155/2018/9310838), 2018-06-25
Supplement: f1 [file 9310838.f1.zip › 2012_sm00-10cm_daily_ZDB_ZHY_57923_366days_allin.txt]

57923     57923     guizhou        107.8697       25.9897          136       151     2012      01        01        001              0.000000   -9999.000000       0.750776   -9999.000000       0.101000       0.087000   -9999.000000   -9999.000000
57923     57923     guizhou        107.8697       25.9897          136       151     2012      01        02        002              0.000000       5.006622       5.350774       0.269282       0.109000       0.125300   -9999.000000       0.258000
57923     57923     guizhou        107.8697       25.9897          136       151     2012      01        03        003              0.000000       4.626770       8.466645       0.282169   -9999.000000   -9999.000000   -9999.000000   -9999.000000
57923     57923     guizhou        107.8697       25.9897          136       151     2012      01        04        004              0.000000       2.226715       0.177971       0.292554   -9999.000000   -9999.000000       0.051000       0.057000
57923     57923     guizhou        107.8697       25.9897          136       151     2012      01        05        005              0.000000       1.417206       2.513655       0.265644   -9999.000000   -9999.000000       0.052900   -9999.000000
57923     57923     guizhou        107.8697       25.9897          136       151     2012      01        06        006              0.000000       0.882782       5.062217       0.246445       0.111000   -9999.000000       0.046600       0.301000
57923     57923     guizhou        107.8697       25.9897          136       151     2012      01        07        007              0.000000       1.533051       0.771211       0.270516   -9999.000000   -9999.000000   -9999.000000       0.327000
57923     57923     guizhou        107.8697       25.9897          136       151     2012      01        08        008              0.000000       1.689453       0.233000       0.269398   -9999.000000   -9999.000000   -9999.000000   -9999.000000
57923     57923     guizhou        107.8697       25.9897          136       151     2012      01        09        009              0.000000       2.745148       0.426111       0.272348   -9999.000000       0.110400   -9999.000000       0.431000
57923     57923     guizhou        107.8697       25.9897          136       151     2012      01        10        010              0.000000       3.377899       0.325444       0.273227       0.114000       0.097300       0.042400   -9999.000000
57923     57923     guizhou        107.8697       25.9897          136       151     2012      01        11        011              0.000000       3.511353       0.265056       0.271510       0.088000   -9999.000000       0.045500       0.158000
57923     57923     guizhou        107.8697       25.9897          136       151     2012      01        12        012              0.000000       2.330719       1.479291       0.269442       0.082000       0.237800   -9999.000000       0.308000
57923     57923     guizhou        107.8697       25.9897          136       151     2012      01        13        013              0.276571       2.864746       2.872923       0.272926   -9999.000000   -9999.000000   -9999.000000       0.413000
57923     57923     guizhou        107.8697       25.9897          136       151     2012      01        14        014              0.343214       3.475464      32.774029       0.278504   -9999.000000       0.257200   -9999.000000       0.460000
57923     57923     guizhou        107.8697       25.9897          136       151     2012      01        15        015              0.355952       3.172729       2.538994       0.309401       0.092000       0.324800       0.042200   -9999.000000
57923     57923     guizhou        107.8697       25.9897          136       151     2012      01        16        016              0.341714       2.656921       1.775282       0.308475       0.091500   -9999.000000       0.044300       0.314000
57923     57923     guizhou        107.8697       25.9897          136       151     2012      01        17        017              0.000000       3.599304       6.281340       0.294285       0.094500       0.253500       0.039100   -9999.000000
57923     57923     guizhou        107.8697       25.9897          136       151     2012      01        18        018              0.343235       2.179016       1.641401       0.293881   -9999.000000   -9999.000000   -9999.000000       0.439000
57923     57923     guizhou        107.8697       25.9897          136       151     2012      01        19        019              0.337400       2.281372       2.304166       0.292753   -9999.000000       0.145300   -9999.000000       0.480000
57923     57923     guizhou        107.8697       25.9897          136       151     2012      01        20        020              0.333333       2.510590       2.251862       0.286610       0.102000   -9999.000000   -9999.000000   -9999.000000
57923     57923     guizhou        107.8697       25.9897          136       151     2012      01        21        021              0.329500       2.036438       0.279930       0.284185   -9999.000000   -9999.000000       0.039900       0.413000
57923     57923     guizhou        107.8697       25.9897          136       151     2012      01        22        022              0.324250       1.684235       0.000000       0.271598   -9999.000000   -9999.000000       0.036000   -9999.000000
57923     57923     guizhou        107.8697       25.9897          136       151     2012      01        23        023              0.320158       0.929932       0.607497       0.238973   -9999.000000   -9999.000000       0.034800       0.282000
57923     57923     guizhou        107.8697       25.9897          136       151     2012      01        24        024              0.313667       0.940460       0.031184       0.234299   -9999.000000   -9999.000000   -9999.000000       0.174000
57923     57923     guizhou        107.8697       25.9897          136       151     2012      01        25        025              0.308143       0.862091       0.226485       0.225531       0.110000       0.299800   -9999.000000   -9999.000000
57923     57923     guizhou        107.8697       25.9897          136       151     2012      01        26        026              0.304333       1.411133       0.000000       0.242894       0.104000   -9999.000000       0.039000       0.320000
57923     57923     guizhou        107.8697       25.9897          136       151     2012      01        27        027              0.302905       2.035889       0.043478       0.261774       0.101000       0.166000       0.037800   -9999.000000
57923     57923     guizhou        107.8697       25.9897          136       151     2012      01        28        028              0.296913       2.777618       0.000000       0.272597       0.088000       0.166800       0.034200       0.375000
57923     57923     guizhou        107.8697       25.9897          136       151     2012      01        29        029              0.292174       3.491272       0.057783       0.275970   -9999.000000   -9999.000000   -9999.000000       0.185000
57923     57923     guizhou        107.8697       25.9897          136       151     2012      01        30        030              0.288000       3.344635       0.000000       0.276273   -9999.000000       0.145100   -9999.000000       0.115000
57923     57923     guizhou        107.8697       25.9897          136       151     2012      01        31        031              0.286174       3.935089       0.000000       0.275724       0.101000   -9999.000000   -9999.000000       0.197000
57923     57923     guizhou        107.8697       25.9897          136       151     2012      02        01        032              0.284200       6.213226       1.363690       0.274888       0.083000       0.040100       0.036100   -9999.000000
57923     57923     guizhou        107.8697       25.9897          136       151     2012      02        02        033              0.286000       6.143921       0.840365       0.277763       0.065000       0.076500       0.032600       0.319000
57923     57923     guizhou        107.8697       25.9897          136       151     2012      02        03        034              0.283450       3.190460       1.008307       0.277791   -9999.000000   -9999.000000       0.032800   -9999.000000
57923     57923     guizhou        107.8697       25.9897          136       151     2012      02        04        035              0.283000       5.317535       1.627931       0.277001   -9999.000000       0.278500   -9999.000000       0.445000
57923     57923     guizhou        107.8697       25.9897          136       151     2012      02        05        036              0.318000       5.972015       2.623418       0.279744       0.088500   -9999.000000   -9999.000000       0.383000
57923     57923     guizhou        107.8697       25.9897          136       151     2012      02        06        037              0.324562       5.718811       0.090944       0.283917       0.080000   -9999.000000   -9999.000000   -9999.000000
57923     57923     guizhou        107.8697       25.9897          136       151     2012      02        07        038              0.000000       6.779541       0.000000       0.278364       0.081000       0.396000       0.035300       0.346000
57923     57923     guizhou        107.8697       25.9897          136       151     2012      02        08        039              0.000000       6.226166       0.292132       0.274291   -9999.000000   -9999.000000       0.036000   -9999.000000
57923     57923     guizhou        107.8697       25.9897          136       151     2012      02        09        040              0.000000       2.877289       1.008821       0.270405   -9999.000000       0.135300       0.032900       0.172000
57923     57923     guizhou        107.8697       25.9897          136       151     2012      02        10        041              0.000000       1.991516       0.270418       0.265216   -9999.000000   -9999.000000   -9999.000000       0.158000
57923     57923     guizhou        107.8697       25.9897          136       151     2012      02        11        042              0.000000       2.090607       0.302291       0.261775       0.117000   -9999.000000   -9999.000000       0.198000
57923     57923     guizhou        107.8697       25.9897          136       151     2012      02        12        043              0.000000       3.363037       1.717831       0.269816       0.114000       0.240200   -9999.000000       0.394000
57923     57923     guizhou        107.8697       25.9897          136       151     2012      02        13        044              0.000000       5.106964       1.976455       0.275953   -9999.000000   -9999.000000       0.029400   -9999.000000
57923     57923     guizhou        107.8697       25.9897          136       151     2012      02        14        045              0.000000       5.781158       1.256081       0.279029   -9999.000000       0.090700   -9999.000000       0.473000
57923     57923     guizhou        107.8697       25.9897          136       151     2012      02        15        046              0.000000       4.870117       0.118937       0.278528   -9999.000000   -9999.000000   -9999.000000   -9999.000000
57923     57923     guizhou        107.8697       25.9897          136       151     2012      02        16        047              0.000000       4.027985       0.125356       0.274579       0.120000   -9999.000000   -9999.000000       0.284000
57923     57923     guizhou        107.8697       25.9897          136       151     2012      02        17        048              0.000000       3.955261       0.000000       0.272152       0.118000   -9999.000000   -9999.000000       0.237000
57923     57923     guizhou        107.8697       25.9897          136       151     2012      02        18        049              0.000000       3.165070       0.000000       0.270282   -9999.000000   -9999.000000       0.033500   -9999.000000
57923     57923     guizhou        107.8697       25.9897          136       151     2012      02        19        050              0.000000       2.227356       0.743874       0.263378   -9999.000000       0.240400       0.036100       0.224000
57923     57923     guizhou        107.8697       25.9897          136       151     2012      02        20        051              0.000000       4.515198       4.387094       0.268223   -9999.000000       0.170700       0.031400   -9999.000000
57923     57923     guizhou        107.8697       25.9897          136       151     2012      02        21        052              0.000000       5.286896       4.899823       0.279681       0.078000   -9999.000000   -9999.000000       0.639000
57923     57923     guizhou        107.8697       25.9897          136       151     2012      02        22        053              0.000000       7.264465       3.100931       0.286510       0.074500       0.252900   -9999.000000       0.666000
57923     57923     guizhou        107.8697       25.9897          136       151     2012      02        23        054              0.000000       7.430176       2.219728       0.286986       0.066500   -9999.000000   -9999.000000   -9999.000000
57923     57923     guizhou        107.8697       25.9897          136       151     2012      02        24        055              0.000000       8.277222       1.123552       0.282063   -9999.000000       0.047400       0.034100       0.393000
57923     57923     guizhou        107.8697       25.9897          136       151     2012      02        25        056              0.000000       6.972107       0.981351       0.279590   -9999.000000       0.129400       0.035700   -9999.000000
57923     57923     guizhou        107.8697       25.9897          136       151     2012      02        26        057              0.000000       3.908539       0.075235       0.276731       0.083000   -9999.000000       0.031400       0.244000
57923     57923     guizhou        107.8697       25.9897          136       151     2012      02        27        058              0.000000       2.417267       0.912016       0.267582   -9999.000000       0.338000   -9999.000000       0.257000
57923     57923     guizhou        107.8697       25.9897          136       151     2012      02        28        059              0.000000       2.860199       0.740817       0.269492       0.077500   -9999.000000   -9999.000000       0.411000
57923     57923     guizhou        107.8697       25.9897          136       151     2012      02        29        060              0.000000   -9999.000000       0.053050   -9999.000000       0.069000       0.021800   -9999.000000   -9999.000000
57923     57923     guizhou        107.8697       25.9897          136       151     2012      03        01        061              0.000000       3.023438       0.490119       0.271546   -9999.000000       0.202700       0.040200   -9999.000000
57923     57923     guizhou        107.8697       25.9897          136       151     2012      03        02        062              0.000000       7.778870       1.277593       0.270897       0.099000   -9999.000000       0.037600       0.394000
57923     57923     guizhou        107.8697       25.9897          136       151     2012      03        03        063              0.000000       7.092712       4.013707       0.272815       0.103000   -9999.000000   -9999.000000   -9999.000000
57923     57923     guizhou        107.8697       25.9897          136       151     2012      03        04        064              0.000000       6.323486       3.386028       0.278665       0.099500   -9999.000000   -9999.000000       0.495000
57923     57923     guizhou        107.8697       25.9897          136       151     2012      03        05        065              0.000000       5.440460       0.333448       0.285771       0.094000   -9999.000000   -9999.000000       0.500000
57923     57923     guizhou        107.8697       25.9897          136       151     2012      03        06        066              0.000000       9.557220       0.468254       0.275588   -9999.000000       0.203700       0.052100   -9999.000000
57923     57923     guizhou        107.8697       25.9897          136       151     2012      03        07        067              0.000000       6.318146       0.943177       0.273935   -9999.000000   -9999.000000       0.063900       0.442000
57923     57923     guizhou        107.8697       25.9897          136       151     2012      03        08        068              0.322900       5.034393       0.727150       0.273030       0.111500       0.050600       0.056700   -9999.000000
57923     57923     guizhou        107.8697       25.9897          136       151     2012      03        09        069              0.318273       4.353149       0.775508       0.274047       0.101500       0.232600   -9999.000000       0.258000
57923     57923     guizhou        107.8697       25.9897          136       151     2012      03        10        070              0.307826       4.902771       0.000000       0.271596       0.091500   -9999.000000   -9999.000000       0.394000
57923     57923     guizhou        107.8697       25.9897          136       151     2012      03        11        071              0.298583       9.211395       0.000000       0.267767   -9999.000000       0.146500       0.060900       0.380000
57923     57923     guizhou        107.8697       25.9897          136       151     2012      03        12        072              0.295087       9.220825       0.000000       0.266240   -9999.000000   -9999.000000       0.041600       0.310000
57923     57923     guizhou        107.8697       25.9897          136       151     2012      03        13        073              0.286208       7.465973       0.086256       0.266647       0.111000       0.093900       0.044800   -9999.000000
57923     57923     guizhou        107.8697       25.9897          136       151     2012      03        14        074              0.281700      13.515961       1.623361       0.263290       0.109500       0.130900   -9999.000000       0.401000
57923     57923     guizhou        107.8697       25.9897          136       151     2012      03        15        075              0.281583      10.891449       0.178134       0.268350       0.100500   -9999.000000   -9999.000000   -9999.000000
57923     57923     guizhou        107.8697       25.9897          136       151     2012      03        16        076              0.272913      14.443787       0.000000       0.268207   -9999.000000       0.284300   -9999.000000       0.423000
57923     57923     guizhou        107.8697       25.9897          136       151     2012      03        17        077              0.266000      13.588379       0.559669       0.265392   -9999.000000   -9999.000000       0.038700       0.429000
57923     57923     guizhou        107.8697       25.9897          136       151     2012      03        18        078              0.255250      18.205566       0.000000       0.262031       0.100000       0.135500       0.039700   -9999.000000
57923     57923     guizhou        107.8697       25.9897          136       151     2012      03        19        079              0.239783      20.804901       0.000000       0.259325       0.096500       0.262200       0.053500       0.427000
57923     57923     guizhou        107.8697       25.9897          136       151     2012      03        20        080              0.228625      23.042969       0.000000       0.252748       0.099500   -9999.000000   -9999.000000   -9999.000000
57923     57923     guizhou        107.8697       25.9897          136       151     2012      03        21        081              0.225733      17.819061       0.584810       0.251892       0.088000       0.415200   -9999.000000       0.450000
57923     57923     guizhou        107.8697       25.9897          136       151     2012      03        22        082              0.232200      17.852051      10.369853       0.254149   -9999.000000       0.095800   -9999.000000       0.477000
57923     57923     guizhou        107.8697       25.9897          136       151     2012      03        23        083              0.264043      15.405609       0.081009       0.274473       0.094000   -9999.000000       0.058700   -9999.000000
57923     57923     guizhou        107.8697       25.9897          136       151     2012      03        24        084              0.254333       9.946838       0.000000       0.273961       0.091000       0.160000       0.051900       0.280000
57923     57923     guizhou        107.8697       25.9897          136       151     2012      03        25        085              0.000000      14.876129       0.045314       0.262088       0.084000   -9999.000000       0.053000   -9999.000000
57923     57923     guizhou        107.8697       25.9897          136       151     2012      03        26        086              0.224750      16.265564       0.435805       0.256875       0.086500       0.029400   -9999.000000   -9999.000000
57923     57923     guizhou        107.8697       25.9897          136       151     2012      03        27        087              0.256083      17.389404      17.476025       0.253443   -9999.000000       0.190400   -9999.000000       0.604000
57923     57923     guizhou        107.8697       25.9897          136       151     2012      03        28        088              0.353545      16.955566      10.992403       0.282343   -9999.000000   -9999.000000       0.068700       0.866000
57923     57923     guizhou        107.8697       25.9897          136       151     2012      03        29        089              0.369000      15.092377      16.781105       0.305251       0.107500       0.250600       0.068000       0.940000
57923     57923     guizhou        107.8697       25.9897          136       151     2012      03        30        090              0.351174      15.298126       3.640630       0.310444       0.095500   -9999.000000       0.061500   -9999.000000
57923     57923     guizhou        107.8697       25.9897          136       151     2012      03        31        091              0.319958      14.445282       0.000000       0.296236       0.080500       0.202300   -9999.000000       0.593000
57923     57923     guizhou        107.8697       25.9897          136       151     2012      04        01        092              0.296500      15.750092       0.000000       0.279751   -9999.000000       0.161300   -9999.000000   -9999.000000
57923     57923     guizhou        107.8697       25.9897          136       151     2012      04        02        093              0.273708      18.694366       0.000000       0.269799   -9999.000000   -9999.000000   -9999.000000       0.427000
57923     57923     guizhou        107.8697       25.9897          136       151     2012      04        03        094              0.258458      20.945892       0.146178       0.265643       0.105500       0.248100       0.054600       0.405000
57923     57923     guizhou        107.8697       25.9897          136       151     2012      04        04        095              0.252500      20.342987       0.961823       0.266609       0.099500   -9999.000000       0.059600   -9999.000000
57923     57923     guizhou        107.8697       25.9897          136       151     2012      04        05        096              0.235333      20.545929       2.553615       0.266489       0.100500       0.114800       0.054700       0.569000
57923     57923     guizhou        107.8697       25.9897          136       151     2012      04        06        097              0.231625      18.968170       0.160268       0.265391   -9999.000000       0.084700   -9999.000000   -9999.000000
57923     57923     guizhou        107.8697       25.9897          136       151     2012      04        07        098              0.230000      17.498718       0.074328       0.267229   -9999.000000   -9999.000000   -9999.000000       0.293000
57923     57923     guizhou        107.8697       25.9897          136       151     2012      04        08        099              0.239958      14.920624       9.815716       0.264333       0.100000       0.143000   -9999.000000       0.251000
57923     57923     guizhou        107.8697       25.9897          136       151     2012      04        09        100              0.304542      17.194794       0.133568       0.275711       0.104500       0.018300       0.063700       0.558000
57923     57923     guizhou        107.8697       25.9897          136       151     2012      04        10        101              0.283000      18.243958       0.000000       0.282201       0.097500   -9999.000000       0.063900       0.677000
57923     57923     guizhou        107.8697       25.9897          136       151     2012      04        11        102              0.256083      22.602997       0.411605       0.268656       0.094000       0.362100       0.056900   -9999.000000
57923     57923     guizhou        107.8697       25.9897          136       151     2012      04        12        103              0.261208      23.364349      19.013887       0.262551   -9999.000000   -9999.000000   -9999.000000       0.737000
57923     57923     guizhou        107.8697       25.9897          136       151     2012      04        13        104              0.265083      22.434418       0.395009       0.300145   -9999.000000       0.263200   -9999.000000   -9999.000000
57923     57923     guizhou        107.8697       25.9897          136       151     2012      04        14        105              0.253667      17.011414       0.121084       0.281070       0.127500       0.241600       0.068900       0.624000
57923     57923     guizhou        107.8697       25.9897          136       151     2012      04        15        106              0.242750      16.184143       0.000000       0.274632       0.115500   -9999.000000       0.066700       0.586000
57923     57923     guizhou        107.8697       25.9897          136       151     2012      04        16        107              0.248000      16.867737       1.253820       0.270396       0.104000       0.293400       0.082200   -9999.000000
57923     57923     guizhou        107.8697       25.9897          136       151     2012      04        17        108              0.252708      20.465057       3.465056       0.264617   -9999.000000   -9999.000000   -9999.000000       0.360000
57923     57923     guizhou        107.8697       25.9897          136       151     2012      04        18        109              0.276958      17.996094       0.000000       0.271095   -9999.000000       0.073200   -9999.000000   -9999.000000
57923     57923     guizhou        107.8697       25.9897          136       151     2012      04        19        110              0.287304      19.150208       7.199453       0.268733       0.106000       0.312200   -9999.000000       0.575000
57923     57923     guizhou        107.8697       25.9897          136       151     2012      04        20        111              0.305042      22.116638       0.159652       0.273641       0.110000   -9999.000000       0.072900       0.677000
57923     57923     guizhou        107.8697       25.9897          136       151     2012      04        21        112              0.272833      19.585724       0.000000       0.272487       0.095500       0.196900       0.073200       0.418000
57923     57923     guizhou        107.8697       25.9897          136       151     2012      04        22        113              0.240167      21.541351       0.171973       0.260983   -9999.000000   -9999.000000   -9999.000000       0.366000
57923     57923     guizhou        107.8697       25.9897          136       151     2012      04        23        114              0.219250      22.900909       0.000000       0.253734   -9999.000000       0.103000   -9999.000000   -9999.000000
57923     57923     guizhou        107.8697       25.9897          136       151     2012      04        24        115              0.234417      23.278412      13.354687       0.252428       0.092000   -9999.000000   -9999.000000       0.548000
57923     57923     guizhou        107.8697       25.9897          136       151     2012      04        25        116              0.000000      25.360443       0.000000       0.268965       0.129000   -9999.000000   -9999.000000       0.750000
57923     57923     guizhou        107.8697       25.9897          136       151     2012      04        26        117              0.280833      16.998413       0.000000       0.274671       0.110500       0.491600       0.080200       0.461000
57923     57923     guizhou        107.8697       25.9897          136       151     2012      04        27        118              0.262792      20.486023       0.000000       0.261107       0.100000   -9999.000000       0.074000       0.525000
57923     57923     guizhou        107.8697       25.9897          136       151     2012      04        28        119              0.293000      21.744171      26.667870       0.256802   -9999.000000   -9999.000000       0.063900   -9999.000000
57923     57923     guizhou        107.8697       25.9897          136       151     2012      04        29        120              0.343542      22.170685       5.800659       0.293268       0.130000       0.566100   -9999.000000       0.802000
57923     57923     guizhou        107.8697       25.9897          136       151     2012      04        30        121              0.324625      22.681427       0.345898       0.296821       0.120000   -9999.000000   -9999.000000   -9999.000000
57923     57923     guizhou        107.8697       25.9897          136       151     2012      05        01        122              0.304708      25.472595       3.698894       0.278923       0.149000       0.267900       0.084400       0.525000
57923     57923     guizhou        107.8697       25.9897          136       151     2012      05        02        123              0.327667      22.548157       0.360308       0.275940       0.143000       0.408400       0.090200       0.541000
57923     57923     guizhou        107.8697       25.9897          136       151     2012      05        03        124              0.339250      20.965729       1.237955       0.271908   -9999.000000   -9999.000000       0.092900   -9999.000000
57923     57923     guizhou        107.8697       25.9897          136       151     2012      05        04        125              0.337478      20.277679       1.195239       0.270697   -9999.000000       0.233900   -9999.000000       0.572000
57923     57923     guizhou        107.8697       25.9897          136       151     2012      05        05        126              0.341500      19.899963       1.726406       0.271252       0.153000   -9999.000000   -9999.000000   -9999.000000
57923     57923     guizhou        107.8697       25.9897          136       151     2012      05        06        127              0.321875      22.799438       0.201392       0.272769       0.142500       0.147500   -9999.000000       0.549000
57923     57923     guizhou        107.8697       25.9897          136       151     2012      05        07        128              0.294917      24.345703       0.000000       0.264224   -9999.000000       0.231200       0.065900       0.555000
57923     57923     guizhou        107.8697       25.9897          136       151     2012      05        08        129              0.272792      25.447845       2.261092       0.256386   -9999.000000   -9999.000000       0.066100       0.527000
57923     57923     guizhou        107.8697       25.9897          136       151     2012      05        09        130              0.336042      25.650513      17.396029       0.256059   -9999.000000       0.510600       0.056600       0.925000
57923     57923     guizhou        107.8697       25.9897          136       151     2012      05        10        131              0.360458      24.980896      16.518023       0.297736       0.163500   -9999.000000   -9999.000000   -9999.000000
57923     57923     guizhou        107.8697       25.9897          136       151     2012      05        11        132              0.350292      22.972351       0.210863       0.305118       0.172000       0.217000   -9999.000000       0.606000
57923     57923     guizhou        107.8697       25.9897          136       151     2012      05        12        133              0.361042      24.683289      15.198198       0.280515       0.173500       0.585100   -9999.000000   -9999.000000
57923     57923     guizhou        107.8697       25.9897          136       151     2012      05        13        134              0.361625      22.553070      22.967592       0.306448   -9999.000000   -9999.000000       0.081700       0.711000
57923     57923     guizhou        107.8697       25.9897          136       151     2012      05        14        135              0.359958      21.143677       1.113737       0.298107   -9999.000000       0.557700       0.091400       0.934000
57923     57923     guizhou        107.8697       25.9897          136       151     2012      05        15        136              0.348083      18.675659       0.266317       0.300270       0.187000   -9999.000000       0.086500   -9999.000000
57923     57923     guizhou        107.8697       25.9897          136       151     2012      05        16        137              0.332750      19.276855       0.000000       0.283371       0.179500   -9999.000000   -9999.000000       0.532000
57923     57923     guizhou        107.8697       25.9897          136       151     2012      05        17        138              0.322458      21.054596       0.000000       0.276133       0.174000       0.414900   -9999.000000   -9999.000000
57923     57923     guizhou        107.8697       25.9897          136       151     2012      05        18        139              0.314250      22.454163      24.889465       0.273352       0.165000   -9999.000000       0.087200       0.599000
57923     57923     guizhou        107.8697       25.9897          136       151     2012      05        19        140              0.342625      24.118195       1.005943       0.294724   -9999.000000       0.275800       0.088000       0.838000
57923     57923     guizhou        107.8697       25.9897          136       151     2012      05        20        141              0.331375      24.970612       1.216384       0.303852   -9999.000000   -9999.000000       0.081400   -9999.000000
57923     57923     guizhou        107.8697       25.9897          136       151     2012      05        21        142              0.364609      25.829895       9.423812       0.279830       0.179000   -9999.000000   -9999.000000       0.889000
57923     57923     guizhou        107.8697       25.9897          136       151     2012      05        22        143              0.378652      22.430511      15.302725       0.297255       0.174000       0.451400   -9999.000000   -9999.000000
57923     57923     guizhou        107.8697       25.9897          136       151     2012      05        23        144              0.378250      20.439667       8.846915       0.308769   -9999.000000   -9999.000000   -9999.000000       0.938000
57923     57923     guizhou        107.8697       25.9897          136       151     2012      05        24        145              0.382208      19.894867      35.039688       0.301557   -9999.000000       0.296100       0.095100       0.953000
57923     57923     guizhou        107.8697       25.9897          136       151     2012      05        25        146              0.000000      18.274963      14.832002       0.328622   -9999.000000       0.304800       0.092100       0.914000
57923     57923     guizhou        107.8697       25.9897          136       151     2012      05        26        147              0.362417      17.591125       0.000000       0.320676       0.162000   -9999.000000       0.090300       0.748000
57923     57923     guizhou        107.8697       25.9897          136       151     2012      05        27        148              0.360292      19.880157       6.314322       0.303742       0.155500       0.319400   -9999.000000   -9999.000000
57923     57923     guizhou        107.8697       25.9897          136       151     2012      05        28        149              0.361043      22.801605       0.184050       0.302370       0.140500   -9999.000000   -9999.000000       0.755000
57923     57923     guizhou        107.8697       25.9897          136       151     2012      05        29        150              0.360958      23.533234      11.629330       0.297058   -9999.000000       0.435800   -9999.000000   -9999.000000
57923     57923     guizhou        107.8697       25.9897          136       151     2012      05        30        151              0.348958      21.732086       0.043690       0.307290   -9999.000000       0.313200       0.087800   -9999.000000
57923     57923     guizhou        107.8697       25.9897          136       151     2012      05        31        152              0.341250      21.831696       0.325172       0.291998       0.164000   -9999.000000       0.089100   -9999.000000
57923     57923     guizhou        107.8697       25.9897          136       151     2012      06        01        153              0.341375      20.347809       0.932658       0.288619       0.234500       0.312000       0.092500   -9999.000000
57923     57923     guizhou        107.8697       25.9897          136       151     2012      06        02        154              0.343000      18.818756       0.171100       0.287955       0.215000       0.251700   -9999.000000       0.634000
57923     57923     guizhou        107.8697       25.9897          136       151     2012      06        03        155              0.347292      19.497681       8.297235       0.283986   -9999.000000   -9999.000000   -9999.000000   -9999.000000
57923     57923     guizhou        107.8697       25.9897          136       151     2012      06        04        156              0.373125      20.216675       4.459045       0.290334   -9999.000000       0.304400       0.065600       0.772000
57923     57923     guizhou        107.8697       25.9897          136       151     2012      06        05        157              0.372333      19.668823       2.328481       0.297950       0.214000   -9999.000000       0.067900       0.732000
57923     57923     guizhou        107.8697       25.9897          136       151     2012      06        06        158              0.368208      21.444672       1.225046       0.289569       0.228000       0.330100       0.066900       0.784000
57923     57923     guizhou        107.8697       25.9897          136       151     2012      06        07        159              0.371458      23.049500      11.191670       0.284704       0.205000       0.221400   -9999.000000       0.847000
57923     57923     guizhou        107.8697       25.9897          136       151     2012      06        08        160              0.358750      21.560638       1.159188       0.302094       0.208000   -9999.000000   -9999.000000   -9999.000000
57923     57923     guizhou        107.8697       25.9897          136       151     2012      06        09        161              0.349167      23.874146       2.075335       0.287253   -9999.000000       0.381400   -9999.000000       0.662000
57923     57923     guizhou        107.8697       25.9897          136       151     2012      06        10        162              0.364333      26.171295      19.396191       0.283625       0.203000   -9999.000000       0.065400   -9999.000000
57923     57923     guizhou        107.8697       25.9897          136       151     2012      06        11        163              0.000000      24.683258       0.163569       0.307525       0.152500       0.219800       0.080100       0.698000
57923     57923     guizhou        107.8697       25.9897          136       151     2012      06        12        164              0.355875      22.801941       0.134101       0.293422       0.143500       0.414800       0.077400       0.723000
57923     57923     guizhou        107.8697       25.9897          136       151     2012      06        13        165              0.347208      22.555389       0.000000       0.283620       0.133000   -9999.000000   -9999.000000   -9999.000000
57923     57923     guizhou        107.8697       25.9897          136       151     2012      06        14        166              0.341542      23.906830       0.000000       0.279601   -9999.000000       0.232900   -9999.000000       0.458000
57923     57923     guizhou        107.8697       25.9897          136       151     2012      06        15        167              0.332500      22.749817       0.000000       0.277551   -9999.000000   -9999.000000       0.076700   -9999.000000
57923     57923     guizhou        107.8697       25.9897          136       151     2012      06        16        168              0.324000      23.650543       0.229799       0.273728       0.130000       0.136200       0.073500       0.529000
57923     57923     guizhou        107.8697       25.9897          136       151     2012      06        17        169              0.315917      23.897736       0.000000       0.270344       0.129500       0.269700       0.074500       0.639000
57923     57923     guizhou        107.8697       25.9897          136       151     2012      06        18        170              0.307458      24.660034       0.144185       0.268969       0.114500   -9999.000000       0.097500   -9999.000000
57923     57923     guizhou        107.8697       25.9897          136       151     2012      06        19        171              0.318952      24.516541       3.309052       0.267907   -9999.000000       0.401100   -9999.000000       0.506000
57923     57923     guizhou        107.8697       25.9897          136       151     2012      06        20        172              0.324625      20.819946       0.000000       0.278580   -9999.000000       0.227900   -9999.000000   -9999.000000
57923     57923     guizhou        107.8697       25.9897          136       151     2012      06        21        173              0.314792      24.682312       0.783552       0.269398       0.188500   -9999.000000       0.101400       0.655000
57923     57923     guizhou        107.8697       25.9897          136       151     2012      06        22        174              0.316917      24.490570       6.696448       0.269309       0.211000       0.419600       0.113100       0.693000
57923     57923     guizhou        107.8697       25.9897          136       151     2012      06        23        175              0.347833      22.157440       1.533592       0.284553       0.199000   -9999.000000       0.104700       0.632000
57923     57923     guizhou        107.8697       25.9897          136       151     2012      06        24        176              0.350667      22.436676      13.669728       0.281050   -9999.000000       0.380200   -9999.000000       0.717000
57923     57923     guizhou        107.8697       25.9897          136       151     2012      06        25        177              0.378333      24.821655       9.058903       0.286967   -9999.000000       0.195200   -9999.000000   -9999.000000
57923     57923     guizhou        107.8697       25.9897          136       151     2012      06        26        178              0.380500      24.474884      19.959990       0.302430       0.199000   -9999.000000   -9999.000000       1.000000
57923     57923     guizhou        107.8697       25.9897          136       151     2012      06        27        179              0.372625      23.781525       8.600519       0.313092       0.199000       0.343300       0.159500   -9999.000000
57923     57923     guizhou        107.8697       25.9897          136       151     2012      06        28        180              0.372750      24.175934       7.099719       0.301326       0.195000   -9999.000000       0.160300       0.856000
57923     57923     guizhou        107.8697       25.9897          136       151     2012      06        29        181              0.366750      24.297699       0.436470       0.295481       0.173000       0.283600       0.144100       0.735000
57923     57923     guizhou        107.8697       25.9897          136       151     2012      06        30        182              0.346292      26.482758       6.244222       0.286143   -9999.000000       0.145800   -9999.000000   -9999.000000
57923     57923     guizhou        107.8697       25.9897          136       151     2012      07        01        183              0.335333      27.845184       0.368452       0.285410   -9999.000000   -9999.000000   -9999.000000       0.615000
57923     57923     guizhou        107.8697       25.9897          136       151     2012      07        02        184              0.326125      25.514374       0.179654       0.281309       0.194000       0.287500       0.092900   -9999.000000
57923     57923     guizhou        107.8697       25.9897          136       151     2012      07        03        185              0.313417      24.844360       0.688992       0.275273       0.181500   -9999.000000       0.087100       0.637000
57923     57923     guizhou        107.8697       25.9897          136       151     2012      07        04        186              0.295333      25.363007       0.000000       0.273043       0.177000       0.135000       0.087100       0.559000
57923     57923     guizhou        107.8697       25.9897          136       151     2012      07        05        187              0.276125      25.596771       0.000000       0.269344   -9999.000000       0.106500   -9999.000000       0.564000
57923     57923     guizhou        107.8697       25.9897          136       151     2012      07        06        188              0.251042      26.241882       0.000000       0.265749   -9999.000000   -9999.000000   -9999.000000       0.650000
57923     57923     guizhou        107.8697       25.9897          136       151     2012      07        07        189              0.226583      26.990967       0.218277       0.262683   -9999.000000       0.127500   -9999.000000   -9999.000000
57923     57923     guizhou        107.8697       25.9897          136       151     2012      07        08        190              0.216348      26.868134       0.660261       0.259444       0.179500   -9999.000000       0.082300       0.486000
57923     57923     guizhou        107.8697       25.9897          136       151     2012      07        09        191              0.209417      25.802216       0.113057       0.258940       0.170500   -9999.000000       0.119900   -9999.000000
57923     57923     guizhou        107.8697       25.9897          136       151     2012      07        10        192              0.202333      25.823547       0.192882       0.257652   -9999.000000       0.303600       0.111000       0.552000
57923     57923     guizhou        107.8697       25.9897          136       151     2012      07        11        193              0.193458      27.013123       0.458764       0.254654   -9999.000000   -9999.000000   -9999.000000       0.514000
57923     57923     guizhou        107.8697       25.9897          136       151     2012      07        12        194              0.187833      27.515991       0.986471       0.253196   -9999.000000       0.429000   -9999.000000   -9999.000000
57923     57923     guizhou        107.8697       25.9897          136       151     2012      07        13        195              0.291167      26.567230      34.883049       0.252153       0.192000       0.266800   -9999.000000       0.893000
57923     57923     guizhou        107.8697       25.9897          136       151     2012      07        14        196              0.337167      24.711304       2.170486       0.316636       0.195000   -9999.000000       0.117700   -9999.000000
57923     57923     guizhou        107.8697       25.9897          136       151     2012      07        15        197              0.366333      27.114227      50.812973       0.286922       0.175000       0.178800       0.093700       0.726000
57923     57923     guizhou        107.8697       25.9897          136       151     2012      07        16        198              0.380217      26.149994      80.866226       0.328212   -9999.000000   -9999.000000       0.093300       1.000000
57923     57923     guizhou        107.8697       25.9897          136       151     2012      07        17        199              0.363792      24.327576      21.910942       0.418672   -9999.000000       0.291400   -9999.000000       0.898000
57923     57923     guizhou        107.8697       25.9897          136       151     2012      07        18        200              0.368875      24.933899      20.437065       0.462349       0.212500       0.225300   -9999.000000       0.834000
57923     57923     guizhou        107.8697       25.9897          136       151     2012      07        19        201              0.355125      25.010468       0.377522       0.374530       0.205500   -9999.000000       0.095200   -9999.000000
57923     57923     guizhou        107.8697       25.9897          136       151     2012      07        20        202              0.337042      25.823120       2.088262       0.322908       0.167500       0.350700       0.090600       0.689000
57923     57923     guizhou        107.8697       25.9897          136       151     2012      07        21        203              0.320833      26.882355       2.415627       0.304187   -9999.000000   -9999.000000       0.091400       0.658000
57923     57923     guizhou        107.8697       25.9897          136       151     2012      07        22        204              0.305375      27.523346       0.646685       0.294336   -9999.000000       0.205100   -9999.000000       0.436000
57923     57923     guizhou        107.8697       25.9897          136       151     2012      07        23        205              0.338304      27.781921       7.235088       0.289587       0.332000       0.299900   -9999.000000       0.653000
57923     57923     guizhou        107.8697       25.9897          136       151     2012      07        24        206              0.348292      25.737946       5.081472       0.299988       0.351000   -9999.000000   -9999.000000   -9999.000000
57923     57923     guizhou        107.8697       25.9897          136       151     2012      07        25        207              0.372667      24.817749      16.394722       0.293246       0.359000       0.427100       0.074400       1.000000
57923     57923     guizhou        107.8697       25.9897          136       151     2012      07        26        208              0.370458      25.371887      22.026541       0.309687       0.272000   -9999.000000       0.077200   -9999.000000
57923     57923     guizhou        107.8697       25.9897          136       151     2012      07        27        209              0.373208      25.535858      11.522347       0.318858   -9999.000000       0.048500       0.067700       0.793000
57923     57923     guizhou        107.8697       25.9897          136       151     2012      07        28        210              0.373333      25.403595       4.447708       0.310920       0.354000       0.356800   -9999.000000       0.857000
57923     57923     guizhou        107.8697       25.9897          136       151     2012      07        29        211              0.367833      25.243591       1.350474       0.303045       0.340000   -9999.000000   -9999.000000   -9999.000000
57923     57923     guizhou        107.8697       25.9897          136       151     2012      07        30        212              0.352375      26.310028       1.263728       0.294260       0.317000       0.291200   -9999.000000       0.615000
57923     57923     guizhou        107.8697       25.9897          136       151     2012      07        31        213              0.334833      26.411957       0.515635       0.289551       0.288000       0.197800       0.133200   -9999.000000
57923     57923     guizhou        107.8697       25.9897          136       151     2012      08        01        214              0.353250      27.479279       1.409136       0.283133   -9999.000000   -9999.000000       0.133000       0.554000
57923     57923     guizhou        107.8697       25.9897          136       151     2012      08        02        215              0.342667      27.515564       0.707605       0.280070   -9999.000000       0.473100       0.121700       0.600000
57923     57923     guizhou        107.8697       25.9897          136       151     2012      08        03        216              0.319917      26.537659       0.000000       0.273932       0.305000   -9999.000000   -9999.000000       0.569000
57923     57923     guizhou        107.8697       25.9897          136       151     2012      08        04        217              0.301958      26.574432       0.398799       0.269748       0.284500       0.195500   -9999.000000       0.643000
57923     57923     guizhou        107.8697       25.9897          136       151     2012      08        05        218              0.296083      26.199158       8.977727       0.267467       0.330500   -9999.000000       0.136300   -9999.000000
57923     57923     guizhou        107.8697       25.9897          136       151     2012      08        06        219              0.355583      25.735138       7.857930       0.287320   -9999.000000   -9999.000000       0.173000       0.661000
57923     57923     guizhou        107.8697       25.9897          136       151     2012      08        07        220              0.363292      24.088196       5.511096       0.296428   -9999.000000       0.287900       0.165300   -9999.000000
57923     57923     guizhou        107.8697       25.9897          136       151     2012      08        08        221              0.346917      24.729309       0.000000       0.292279       0.307000   -9999.000000   -9999.000000       0.596000
57923     57923     guizhou        107.8697       25.9897          136       151     2012      08        09        222              0.329042      26.075897       1.960385       0.276625       0.281500       0.128600   -9999.000000       0.597000
57923     57923     guizhou        107.8697       25.9897          136       151     2012      08        10        223              0.320167      26.608124       0.273600       0.274899       0.289500       0.123900   -9999.000000   -9999.000000
57923     57923     guizhou        107.8697       25.9897          136       151     2012      08        11        224              0.306042      26.947784       1.330801       0.268142       0.178000   -9999.000000       0.165000       0.423000
57923     57923     guizhou        107.8697       25.9897          136       151     2012      08        12        225              0.292792      27.935333       0.181657       0.264198   -9999.000000       0.494100       0.160700   -9999.000000
57923     57923     guizhou        107.8697       25.9897          136       151     2012      08        13        226              0.298542      28.125061      13.942054       0.261287   -9999.000000   -9999.000000       0.143700       0.549000
57923     57923     guizhou        107.8697       25.9897          136       151     2012      08        14        227              0.338958      27.944000       1.450177       0.277811       0.222000       0.188000   -9999.000000       0.869000
57923     57923     guizhou        107.8697       25.9897          136       151     2012      08        15        228              0.317417      27.335327       0.000000       0.287863       0.211500       0.519600   -9999.000000       0.490000
57923     57923     guizhou        107.8697       25.9897          136       151     2012      08        16        229              0.300292      28.043121       0.138707       0.269323       0.174000   -9999.000000       0.163800       0.373000
57923     57923     guizhou        107.8697       25.9897          136       151     2012      08        17        230              0.289833      28.489838       2.304918       0.263114   -9999.000000       0.281700       0.158500   -9999.000000
57923     57923     guizhou        107.8697       25.9897          136       151     2012      08        18        231              0.346667      27.089966      10.045444       0.267449   -9999.000000       0.527600       0.167300       0.820000
57923     57923     guizhou        107.8697       25.9897          136       151     2012      08        19        232              0.360125      26.282532       2.958851       0.286528       0.228000   -9999.000000       0.146300       0.733000
57923     57923     guizhou        107.8697       25.9897          136       151     2012      08        20        233              0.346542      26.631042      11.093921       0.280560       0.205000       0.296100   -9999.000000       0.451000
57923     57923     guizhou        107.8697       25.9897          136       151     2012      08        21        234              0.362500      27.649536       5.160022       0.275793       0.274500   -9999.000000   -9999.000000       0.881000
57923     57923     guizhou        107.8697       25.9897          136       151     2012      08        22        235              0.361167      25.367340       1.638119       0.291872       0.300000       0.189200       0.128300   -9999.000000
57923     57923     guizhou        107.8697       25.9897          136       151     2012      08        23        236              0.350833      21.884827       0.000000       0.283376   -9999.000000       0.290900       0.135300       0.530000
57923     57923     guizhou        107.8697       25.9897          136       151     2012      08        24        237              0.339333      22.364960       0.000000       0.271085   -9999.000000   -9999.000000       0.126500   -9999.000000
57923     57923     guizhou        107.8697       25.9897          136       151     2012      08        25        238              0.000000      23.369965       0.000000       0.265179       0.285000       0.410500   -9999.000000       0.509000
57923     57923     guizhou        107.8697       25.9897          136       151     2012      08        26        239              0.322625      24.246460       0.000000       0.261825       0.273500   -9999.000000   -9999.000000       0.562000
57923     57923     guizhou        107.8697       25.9897          136       151     2012      08        27        240              0.314833      24.648193       4.115176       0.258789       0.252000       0.136300   -9999.000000   -9999.000000
57923     57923     guizhou        107.8697       25.9897          136       151     2012      08        28        241              0.302083      24.234009       0.664776       0.258123   -9999.000000       0.030900       0.133600       0.593000
57923     57923     guizhou        107.8697       25.9897          136       151     2012      08        29        242              0.287667      26.711731       2.290625       0.252952   -9999.000000   -9999.000000       0.140700   -9999.000000
57923     57923     guizhou        107.8697       25.9897          136       151     2012      08        30        243              0.336500      26.497650       1.529458       0.252315       0.276000       0.229200       0.131900       0.497000
57923     57923     guizhou        107.8697       25.9897          136       151     2012      08        31        244              0.340417      27.379639       1.593694       0.248677       0.270000   -9999.000000   -9999.000000       0.542000
57923     57923     guizhou        107.8697       25.9897          136       151     2012      09        01        245              0.340250      27.051086       2.904441       0.250457       0.221000       0.073900   -9999.000000       0.543000
57923     57923     guizhou        107.8697       25.9897          136       151     2012      09        02        246              0.331125      26.261414       3.906647       0.258547   -9999.000000       0.265100       0.146000       0.670000
57923     57923     guizhou        107.8697       25.9897          136       151     2012      09        03        247              0.318083      23.178131       0.281750       0.266893   -9999.000000   -9999.000000       0.146000   -9999.000000
57923     57923     guizhou        107.8697       25.9897          136       151     2012      09        04        248              0.297125      21.286591       0.000000       0.259018       0.217000       0.268600       0.147700       0.400000
57923     57923     guizhou        107.8697       25.9897          136       151     2012      09        05        249              0.274167      23.167847       0.000000       0.251385       0.214500       0.211200   -9999.000000   -9999.000000
57923     57923     guizhou        107.8697       25.9897          136       151     2012      09        06        250              0.259375      24.211914       0.330285       0.248034       0.214000   -9999.000000   -9999.000000       0.517000
57923     57923     guizhou        107.8697       25.9897          136       151     2012      09        07        251              0.243583      24.396454       0.221197       0.247077       0.185000       0.295600   -9999.000000       0.599000
57923     57923     guizhou        107.8697       25.9897          136       151     2012      09        08        252              0.224333      25.930725       0.073812       0.242738   -9999.000000   -9999.000000       0.143300   -9999.000000
57923     57923     guizhou        107.8697       25.9897          136       151     2012      09        09        253              0.209167      26.180328       0.167852       0.239284   -9999.000000       0.226000       0.143300       0.308000
57923     57923     guizhou        107.8697       25.9897          136       151     2012      09        10        254              0.194125      27.046265       0.757149       0.235392       0.210000       0.271600       0.168700   -9999.000000
57923     57923     guizhou        107.8697       25.9897          136       151     2012      09        11        255              0.182958      26.248230       0.572176       0.235647       0.128500   -9999.000000   -9999.000000       0.497000
57923     57923     guizhou        107.8697       25.9897          136       151     2012      09        12        256              0.305875      26.046631      23.376839       0.231757       0.156000       0.368100   -9999.000000       0.452000
57923     57923     guizhou        107.8697       25.9897          136       151     2012      09        13        257              0.373000      22.564880       6.978718       0.293959   -9999.000000   -9999.000000   -9999.000000   -9999.000000
57923     57923     guizhou        107.8697       25.9897          136       151     2012      09        14        258              0.348042      18.876190       0.000000       0.292746   -9999.000000       0.193400       0.172300       0.267000
57923     57923     guizhou        107.8697       25.9897          136       151     2012      09        15        259              0.317042      20.795258       0.000000       0.269474       0.138000       0.162800       0.176900   -9999.000000
57923     57923     guizhou        107.8697       25.9897          136       151     2012      09        16        260              0.298958      21.445129       0.584329       0.260025       0.148000   -9999.000000       0.175400       0.435000
57923     57923     guizhou        107.8697       25.9897          136       151     2012      09        17        261              0.293417      19.416077       0.052490       0.258414       0.148000       0.475800   -9999.000000       0.419000
57923     57923     guizhou        107.8697       25.9897          136       151     2012      09        18        262              0.346167      18.742462       7.026800       0.257042       0.150000   -9999.000000   -9999.000000       0.635000
57923     57923     guizhou        107.8697       25.9897          136       151     2012      09        19        263              0.361125      18.252930       0.366042       0.275931   -9999.000000       0.296400       0.086200       0.523000
57923     57923     guizhou        107.8697       25.9897          136       151     2012      09        20        264              0.367043      19.012024       4.355788       0.267951   -9999.000000       0.266400       0.091900   -9999.000000
57923     57923     guizhou        107.8697       25.9897          136       151     2012      09        21        265              0.375826      19.268860       9.249628       0.272279   -9999.000000   -9999.000000       0.090800       0.745000
57923     57923     guizhou        107.8697       25.9897          136       151     2012      09        22        266              0.377750      19.893005       7.294229       0.290561       0.201500       0.137100   -9999.000000   -9999.000000
57923     57923     guizhou        107.8697       25.9897          136       151     2012      09        23        267              0.377391      19.980011      15.155266       0.293452       0.185500       0.264000   -9999.000000       0.750000
57923     57923     guizhou        107.8697       25.9897          136       151     2012      09        24        268              0.362125      19.485870       1.910229       0.306740   -9999.000000   -9999.000000   -9999.000000       0.682000
57923     57923     guizhou        107.8697       25.9897          136       151     2012      09        25        269              0.354500      19.458649       0.372266       0.286806   -9999.000000       0.172400       0.115300   -9999.000000
57923     57923     guizhou        107.8697       25.9897          136       151     2012      09        26        270              0.346750      21.061127       0.436962       0.276746       0.196500   -9999.000000       0.116200       0.690000
57923     57923     guizhou        107.8697       25.9897          136       151     2012      09        27        271              0.343500      22.379395       0.000000       0.271819       0.179500       0.207200       0.113600   -9999.000000
57923     57923     guizhou        107.8697       25.9897          136       151     2012      09        28        272              0.329600      20.860138       0.000000       0.266973       0.183000   -9999.000000   -9999.000000       0.465000
57923     57923     guizhou        107.8697       25.9897          136       151     2012      09        29        273              0.315500      20.216278       0.000000       0.262457       0.150000   -9999.000000   -9999.000000       0.595000
57923     57923     guizhou        107.8697       25.9897          136       151     2012      09        30        274              0.293958      20.850403       0.101350       0.256713   -9999.000000       0.259200   -9999.000000       0.437000
57923     57923     guizhou        107.8697       25.9897          136       151     2012      10        01        275              0.272042      20.059082       0.000000       0.252973       0.110000   -9999.000000       0.107400       0.580000
57923     57923     guizhou        107.8697       25.9897          136       151     2012      10        02        276              0.250958      20.958649       0.386502       0.249894       0.105500       0.063100       0.115900   -9999.000000
57923     57923     guizhou        107.8697       25.9897          136       151     2012      10        03        277              0.296417      21.726746       7.296351       0.248281       0.126000       0.163100       0.113500       0.654000
57923     57923     guizhou        107.8697       25.9897          136       151     2012      10        04        278              0.370125      18.931366       7.248012       0.267246       0.136000   -9999.000000   -9999.000000   -9999.000000
57923     57923     guizhou        107.8697       25.9897          136       151     2012      10        05        279              0.374375      17.765289       4.723548       0.286878   -9999.000000       0.325000   -9999.000000       0.790000
57923     57923     guizhou        107.8697       25.9897          136       151     2012      10        06        280              0.359500      17.232574       0.172334       0.287015   -9999.000000   -9999.000000       0.117400       0.692000
57923     57923     guizhou        107.8697       25.9897          136       151     2012      10        07        281              0.350250      17.074951       0.098619       0.274647       0.119000       0.333800       0.117000   -9999.000000
57923     57923     guizhou        107.8697       25.9897          136       151     2012      10        08        282              0.336667      18.573303       0.659275       0.268943       0.121500       0.481700       0.073000       0.448000
57923     57923     guizhou        107.8697       25.9897          136       151     2012      10        09        283              0.332625      19.996796       1.835800       0.265793       0.112000   -9999.000000   -9999.000000   -9999.000000
57923     57923     guizhou        107.8697       25.9897          136       151     2012      10        10        284              0.326208      18.020081       0.000000       0.270967   -9999.000000       0.156300   -9999.000000       0.517000
57923     57923     guizhou        107.8697       25.9897          136       151     2012      10        11        285              0.316208      19.000366       0.000000       0.263684   -9999.000000       0.087800   -9999.000000       0.610000
57923     57923     guizhou        107.8697       25.9897          136       151     2012      10        12        286              0.303750      19.356812       1.425905       0.260509       0.197000   -9999.000000       0.075900   -9999.000000
57923     57923     guizhou        107.8697       25.9897          136       151     2012      10        13        287              0.297381      19.075226       1.408656       0.260204       0.195500       0.128500       0.077900       0.543000
57923     57923     guizhou        107.8697       25.9897          136       151     2012      10        14        288              0.301000      17.159546       1.431681       0.266888       0.188500   -9999.000000       0.072300   -9999.000000
57923     57923     guizhou        107.8697       25.9897          136       151     2012      10        15        289              0.303667      17.602783       0.548014       0.266645       0.166000       0.166600   -9999.000000       0.710000
57923     57923     guizhou        107.8697       25.9897          136       151     2012      10        16        290              0.354375      20.369141      15.516253       0.266026   -9999.000000       0.193000   -9999.000000       0.780000
57923     57923     guizhou        107.8697       25.9897          136       151     2012      10        17        291              0.343083      18.818268       0.000000       0.299022   -9999.000000   -9999.000000   -9999.000000       0.338000
57923     57923     guizhou        107.8697       25.9897          136       151     2012      10        18        292              0.322042      18.063232       0.000000       0.272860       0.167500       0.257300       0.121100       0.520000
57923     57923     guizhou        107.8697       25.9897          136       151     2012      10        19        293              0.313042      18.865204       1.805017       0.264904       0.174500   -9999.000000       0.123500   -9999.000000
57923     57923     guizhou        107.8697       25.9897          136       151     2012      10        20        294              0.292833      18.543243       0.000000       0.263847       0.142500       0.179200       0.114200       0.572000
57923     57923     guizhou        107.8697       25.9897          136       151     2012      10        21        295              0.284125      21.576813       0.335651       0.260319   -9999.000000       0.296800   -9999.000000   -9999.000000
57923     57923     guizhou        107.8697       25.9897          136       151     2012      10        22        296              0.308083      22.006531       8.043843       0.258389   -9999.000000   -9999.000000   -9999.000000       0.439000
57923     57923     guizhou        107.8697       25.9897          136       151     2012      10        23        297              0.296667      19.146332       1.421492       0.281277   -9999.000000       0.297000       0.075000       0.467000
57923     57923     guizhou        107.8697       25.9897          136       151     2012      10        24        298              0.292529      16.149353       1.966368       0.270997   -9999.000000   -9999.000000       0.072900   -9999.000000
57923     57923     guizhou        107.8697       25.9897          136       151     2012      10        25        299              0.000000      15.786499       0.326537       0.273206       0.161000       0.170300       0.064300       0.629000
57923     57923     guizhou        107.8697       25.9897          136       151     2012      10        26        300              0.291708      19.075745       1.066102       0.266065       0.143000       0.347400   -9999.000000   -9999.000000
57923     57923     guizhou        107.8697       25.9897          136       151     2012      10        27        301              0.286458      20.297119       0.301986       0.261831   -9999.000000   -9999.000000   -9999.000000       0.392000
57923     57923     guizhou        107.8697       25.9897          136       151     2012      10        28        302              0.000000      20.226501       9.802321       0.259110   -9999.000000       0.292100   -9999.000000       0.504000
57923     57923     guizhou        107.8697       25.9897          136       151     2012      10        29        303              0.346208      18.932373       2.624111       0.283677       0.181000   -9999.000000       0.134900       0.700000
57923     57923     guizhou        107.8697       25.9897          136       151     2012      10        30        304              0.329583      18.702484       0.472583       0.279959       0.162500   -9999.000000       0.137900       0.495000
57923     57923     guizhou        107.8697       25.9897          136       151     2012      10        31        305              0.322083      15.286224       0.000000       0.272265       0.152000       0.378300       0.131600   -9999.000000
57923     57923     guizhou        107.8697       25.9897          136       151     2012      11        01        306              0.313417      16.388062       0.000000       0.264922   -9999.000000   -9999.000000   -9999.000000       0.338000
57923     57923     guizhou        107.8697       25.9897          136       151     2012      11        02        307              0.306750      16.246490       4.052041       0.261845   -9999.000000       0.200900   -9999.000000   -9999.000000
57923     57923     guizhou        107.8697       25.9897          136       151     2012      11        03        308              0.300250      16.872223       0.588470       0.258934       0.151000       0.170500       0.135600       0.423000
57923     57923     guizhou        107.8697       25.9897          136       151     2012      11        04        309              0.292417      16.874847       0.142089       0.259211       0.139000   -9999.000000       0.132200       0.418000
57923     57923     guizhou        107.8697       25.9897          136       151     2012      11        05        310              0.293182      17.703094      10.871776       0.256157       0.124000       0.224500       0.093500   -9999.000000
57923     57923     guizhou        107.8697       25.9897          136       151     2012      11        06        311              0.365333      14.562958       6.892043       0.273181   -9999.000000   -9999.000000   -9999.000000       0.620000
57923     57923     guizhou        107.8697       25.9897          136       151     2012      11        07        312              0.374143      13.220490      12.245179       0.293543   -9999.000000       0.122900   -9999.000000   -9999.000000
57923     57923     guizhou        107.8697       25.9897          136       151     2012      11        08        313              0.363870      12.726349       1.847253       0.302520       0.186000       0.434200   -9999.000000       0.660000
57923     57923     guizhou        107.8697       25.9897          136       151     2012      11        09        314              0.361842      13.019806       1.152220       0.288670       0.170500   -9999.000000       0.084400       0.743000
57923     57923     guizhou        107.8697       25.9897          136       151     2012      11        10        315              0.346083      12.455902       2.293123       0.282324       0.145000       0.410100       0.087000       0.396000
57923     57923     guizhou        107.8697       25.9897          136       151     2012      11        11        316              0.334208      14.127502       0.000000       0.273708       0.122000   -9999.000000       0.080700       0.360000
57923     57923     guizhou        107.8697       25.9897          136       151     2012      11        12        317              0.326208      13.995850       0.000000       0.269641   -9999.000000       0.076400   -9999.000000   -9999.000000
57923     57923     guizhou        107.8697       25.9897          136       151     2012      11        13        318              0.000000      13.678375       0.000000       0.268174   -9999.000000       0.429700   -9999.000000       0.568000
57923     57923     guizhou        107.8697       25.9897          136       151     2012      11        14        319              0.322200      14.164307       0.529447       0.267214       0.142500   -9999.000000   -9999.000000       0.457000
57923     57923     guizhou        107.8697       25.9897          136       151     2012      11        15        320              0.326857      14.995026      11.376513       0.268049       0.139000       0.303400       0.139300       0.490000
57923     57923     guizhou        107.8697       25.9897          136       151     2012      11        16        321              0.383200      15.942505      18.987255       0.281736       0.131000       0.238100       0.136500       0.740000
57923     57923     guizhou        107.8697       25.9897          136       151     2012      11        17        322              0.000000      11.627533       0.477305       0.313845   -9999.000000   -9999.000000       0.129000   -9999.000000
57923     57923     guizhou        107.8697       25.9897          136       151     2012      11        18        323              0.341875      13.315186       0.000000       0.286079   -9999.000000       0.233100   -9999.000000       0.411000
57923     57923     guizhou        107.8697       25.9897          136       151     2012      11        19        324              0.338600      14.057098       0.100444       0.277325       0.145000   -9999.000000   -9999.000000   -9999.000000
57923     57923     guizhou        107.8697       25.9897          136       151     2012      11        20        325              0.339000      12.783539       1.355631       0.275891       0.139500       0.308500       0.069600       0.510000
57923     57923     guizhou        107.8697       25.9897          136       151     2012      11        21        326              0.333364      13.457123       1.216297       0.275436       0.112500       0.199700       0.067200       0.505000
57923     57923     guizhou        107.8697       25.9897          136       151     2012      11        22        327              0.327348      12.869324       0.130705       0.274368       0.109000   -9999.000000       0.061900   -9999.000000
57923     57923     guizhou        107.8697       25.9897          136       151     2012      11        23        328              0.319227      11.316986       0.538580       0.273576   -9999.000000       0.398100   -9999.000000       0.341000
57923     57923     guizhou        107.8697       25.9897          136       151     2012      11        24        329              0.317000       9.789337       0.064615       0.271836       0.114000   -9999.000000   -9999.000000   -9999.000000
57923     57923     guizhou        107.8697       25.9897          136       151     2012      11        25        330              0.309696      10.637299       0.101928       0.272128       0.116000       0.198200   -9999.000000       0.341000
57923     57923     guizhou        107.8697       25.9897          136       151     2012      11        26        331              0.299000      10.784027       0.000000       0.271433       0.115500   -9999.000000   -9999.000000       0.308000
57923     57923     guizhou        107.8697       25.9897          136       151     2012      11        27        332              0.293500       9.307831       0.255999       0.269749       0.113000   -9999.000000       0.069200       0.384000
57923     57923     guizhou        107.8697       25.9897          136       151     2012      11        28        333              0.288250       9.701508       0.179497       0.269713   -9999.000000       0.377500       0.064200       0.300000
57923     57923     guizhou        107.8697       25.9897          136       151     2012      11        29        334              0.286375      10.025940       2.713896       0.269618   -9999.000000   -9999.000000   -9999.000000   -9999.000000
57923     57923     guizhou        107.8697       25.9897          136       151     2012      11        30        335              0.288000       9.496429       4.314840       0.276038       0.130000       0.096200   -9999.000000       0.484000
57923     57923     guizhou        107.8697       25.9897          136       151     2012      12        01        336              0.292000       8.120483       0.401327       0.281274       0.134000       0.357900   -9999.000000   -9999.000000
57923     57923     guizhou        107.8697       25.9897          136       151     2012      12        02        337              0.289417       7.853271       0.000000       0.278731       0.100000   -9999.000000       0.066900       0.441000
57923     57923     guizhou        107.8697       25.9897          136       151     2012      12        03        338              0.283458      10.868896       0.000000       0.272126   -9999.000000       0.381500       0.078800       0.465000
57923     57923     guizhou        107.8697       25.9897          136       151     2012      12        04        339              0.277458      10.128723       0.000000       0.269402   -9999.000000       0.109100       0.074100   -9999.000000
57923     57923     guizhou        107.8697       25.9897          136       151     2012      12        05        340              0.265375       9.357361       0.000000       0.267996       0.129000   -9999.000000   -9999.000000       0.176000
57923     57923     guizhou        107.8697       25.9897          136       151     2012      12        06        341              0.260375      10.267670       0.000000       0.265334       0.121000       0.442500   -9999.000000   -9999.000000
57923     57923     guizhou        107.8697       25.9897          136       151     2012      12        07        342              0.258000      10.134735       0.000000       0.264605       0.123500   -9999.000000       0.074600       0.334000
57923     57923     guizhou        107.8697       25.9897          136       151     2012      12        08        343              0.256783       9.588623       0.124072       0.264898       0.126000       0.307800       0.077400       0.357000
57923     57923     guizhou        107.8697       25.9897          136       151     2012      12        09        344              0.256200       9.835815       4.524232       0.264492   -9999.000000       0.055200       0.079700       0.425000
57923     57923     guizhou        107.8697       25.9897          136       151     2012      12        10        345              0.263364       8.177765       1.805379       0.275926   -9999.000000   -9999.000000   -9999.000000       0.271000
57923     57923     guizhou        107.8697       25.9897          136       151     2012      12        11        346              0.272500       6.250397       0.280160       0.277677       0.135500       0.210000   -9999.000000   -9999.000000
57923     57923     guizhou        107.8697       25.9897          136       151     2012      12        12        347              0.273235       7.185364       0.561000       0.271392       0.132000   -9999.000000   -9999.000000       0.516000
57923     57923     guizhou        107.8697       25.9897          136       151     2012      12        13        348              0.275000       7.623291       0.000000       0.270907       0.104000       0.239600       0.084400       0.535000
57923     57923     guizhou        107.8697       25.9897          136       151     2012      12        14        349              0.275208      13.079468       0.000000       0.268481   -9999.000000   -9999.000000       0.090900       0.353000
57923     57923     guizhou        107.8697       25.9897          136       151     2012      12        15        350              0.000000      15.962921       0.000000       0.264026   -9999.000000   -9999.000000       0.083800       0.418000
57923     57923     guizhou        107.8697       25.9897          136       151     2012      12        16        351              0.258000      12.860779       0.154158       0.262619       0.131000       0.280400   -9999.000000   -9999.000000
57923     57923     guizhou        107.8697       25.9897          136       151     2012      12        17        352              0.252722      10.244415       0.063023       0.262707       0.131500   -9999.000000   -9999.000000       0.270000
57923     57923     guizhou        107.8697       25.9897          136       151     2012      12        18        353              0.242348       7.056519       0.000000       0.262908       0.125500       0.176100       0.074100   -9999.000000
57923     57923     guizhou        107.8697       25.9897          136       151     2012      12        19        354              0.240000       5.772217       4.067750       0.261993       0.121000       0.155700       0.080400       0.310000
57923     57923     guizhou        107.8697       25.9897          136       151     2012      12        20        355              0.000000       5.494751       2.482021       0.269365   -9999.000000   -9999.000000       0.080200       0.358000
57923     57923     guizhou        107.8697       25.9897          136       151     2012      12        21        356              0.259143       4.856262       0.709953       0.278378   -9999.000000       0.545500   -9999.000000   -9999.000000
57923     57923     guizhou        107.8697       25.9897          136       151     2012      12        22        357              0.257565       4.855164       0.000000       0.271738       0.125500       0.131200   -9999.000000       0.305000
57923     57923     guizhou        107.8697       25.9897          136       151     2012      12        23        358              0.250583       4.407990       0.000000       0.267464       0.113000   -9999.000000   -9999.000000   -9999.000000
57923     57923     guizhou        107.8697       25.9897          136       151     2012      12        24        359              0.244300       5.140198       0.216880       0.263992       0.112000       0.540500       0.079400       0.220000
57923     57923     guizhou        107.8697       25.9897          136       151     2012      12        25        360              0.242000       7.301575       3.780691       0.262853   -9999.000000   -9999.000000       0.082300       0.305000
57923     57923     guizhou        107.8697       25.9897          136       151     2012      12        26        361              0.000000       5.267578       1.768395       0.271133   -9999.000000       0.263200       0.085000       0.304000
57923     57923     guizhou        107.8697       25.9897          136       151     2012      12        27        362              0.315222       2.938354       0.358724       0.272435       0.132500   -9999.000000   -9999.000000       0.419000
57923     57923     guizhou        107.8697       25.9897          136       151     2012      12        28        363              0.000000       3.773682       3.175453       0.272454       0.130000   -9999.000000   -9999.000000   -9999.000000
57923     57923     guizhou        107.8697       25.9897          136       151     2012      12        29        364              0.000000       5.413757       1.681294       0.274211   -9999.000000       0.453300   -9999.000000       0.109000
57923     57923     guizhou        107.8697       25.9897          136       151     2012      12        30        365              0.000000       2.435120       0.656040       0.274512   -9999.000000   -9999.000000       0.078600   -9999.000000
57923     57923     guizhou        107.8697       25.9897          136       151     2012      12        31        366              0.289333       3.096619       0.285628       0.269023   -9999.000000       0.094700       0.068500   -9999.000000
