# Supplementary material for: Research on Fusing Multisatellite Soil Moisture Data Based on Bayesian Model Averaging
Source: Hindawi journal article supplement (doi:10.1155/2018/9310838), 2018-06-25
Supplement: f1 [file 9310838.f1.zip › 2012_sm00-10cm_daily_ZDB_ZHY_57926_366days_allin.txt]

57926     57926     guizhou        107.8803       25.4103          138       152     2012      01        01        001              0.000000   -9999.000000       0.116883   -9999.000000       0.113500       0.167500   -9999.000000   -9999.000000
57926     57926     guizhou        107.8803       25.4103          138       152     2012      01        02        002              0.150083       5.786469       5.764585       0.269242       0.117000       0.074900   -9999.000000       0.257000
57926     57926     guizhou        107.8803       25.4103          138       152     2012      01        03        003              0.000000       5.706360       8.334228       0.281078   -9999.000000   -9999.000000   -9999.000000   -9999.000000
57926     57926     guizhou        107.8803       25.4103          138       152     2012      01        04        004              0.186913       3.368164       1.917693       0.294756   -9999.000000       0.111400       0.057100       0.260000
57926     57926     guizhou        107.8803       25.4103          138       152     2012      01        05        005              0.206826       2.026031       1.259110       0.278746       0.130500   -9999.000000       0.055600   -9999.000000
57926     57926     guizhou        107.8803       25.4103          138       152     2012      01        06        006              0.203958       1.545929       4.400292       0.269609       0.119000   -9999.000000       0.054100       0.178000
57926     57926     guizhou        107.8803       25.4103          138       152     2012      01        07        007              0.198783       2.333008       1.029368       0.279873       0.116000       0.324500   -9999.000000       0.172000
57926     57926     guizhou        107.8803       25.4103          138       152     2012      01        08        008              0.000000       2.593811       0.155512       0.278503   -9999.000000   -9999.000000   -9999.000000   -9999.000000
57926     57926     guizhou        107.8803       25.4103          138       152     2012      01        09        009              0.191083       3.289032       0.000000       0.275760   -9999.000000       0.244000   -9999.000000       0.281000
57926     57926     guizhou        107.8803       25.4103          138       152     2012      01        10        010              0.187917       4.758728       0.573501       0.273547       0.117000       0.054000       0.046900   -9999.000000
57926     57926     guizhou        107.8803       25.4103          138       152     2012      01        11        011              0.184348       5.113037       0.080864       0.271659       0.089500   -9999.000000       0.045600       0.184000
57926     57926     guizhou        107.8803       25.4103          138       152     2012      01        12        012              0.181545       3.626526       1.178818       0.271162       0.083000       0.147600   -9999.000000       0.272000
57926     57926     guizhou        107.8803       25.4103          138       152     2012      01        13        013              0.187750       4.852142       7.311244       0.272646   -9999.000000   -9999.000000   -9999.000000       0.386000
57926     57926     guizhou        107.8803       25.4103          138       152     2012      01        14        014              0.277750       5.372284      41.753578       0.283626   -9999.000000       0.140100   -9999.000000       0.375000
57926     57926     guizhou        107.8803       25.4103          138       152     2012      01        15        015              0.271042       4.685547       0.441894       0.323845       0.095500       0.192900       0.044800   -9999.000000
57926     57926     guizhou        107.8803       25.4103          138       152     2012      01        16        016              0.262591       3.955597       1.275635       0.308435       0.093500   -9999.000000       0.044100       0.315000
57926     57926     guizhou        107.8803       25.4103          138       152     2012      01        17        017              0.000000       5.060028       4.342830       0.290710       0.093000       0.193300       0.044200       0.363000
57926     57926     guizhou        107.8803       25.4103          138       152     2012      01        18        018              0.260875       3.499573       1.156381       0.293631   -9999.000000   -9999.000000   -9999.000000       0.525000
57926     57926     guizhou        107.8803       25.4103          138       152     2012      01        19        019              0.257682       3.802643       1.464006       0.288691   -9999.000000       0.195100   -9999.000000       0.275000
57926     57926     guizhou        107.8803       25.4103          138       152     2012      01        20        020              0.253167       3.799103       2.327460       0.286719       0.102000       0.085200   -9999.000000   -9999.000000
57926     57926     guizhou        107.8803       25.4103          138       152     2012      01        21        021              0.248833       3.226929       1.382570       0.287102       0.116500   -9999.000000       0.044000       0.272000
57926     57926     guizhou        107.8803       25.4103          138       152     2012      01        22        022              0.242292       2.679565       0.000000       0.283028   -9999.000000       0.047300       0.039600   -9999.000000
57926     57926     guizhou        107.8803       25.4103          138       152     2012      01        23        023              0.233130       1.470490       0.000000       0.264421       0.102000       0.110200       0.040500       0.262000
57926     57926     guizhou        107.8803       25.4103          138       152     2012      01        24        024              0.227913       1.946655       0.351065       0.265569   -9999.000000   -9999.000000   -9999.000000       0.019000
57926     57926     guizhou        107.8803       25.4103          138       152     2012      01        25        025              0.219292       1.578033       0.000000       0.260958   -9999.000000       0.099400   -9999.000000   -9999.000000
57926     57926     guizhou        107.8803       25.4103          138       152     2012      01        26        026              0.213750       2.633148       0.205055       0.269802       0.111000   -9999.000000       0.039700       0.260000
57926     57926     guizhou        107.8803       25.4103          138       152     2012      01        27        027              0.211545       3.339630       0.058812       0.277163       0.106500       0.250800       0.039900   -9999.000000
57926     57926     guizhou        107.8803       25.4103          138       152     2012      01        28        028              0.205042       4.201050       0.000000       0.278890       0.100000   -9999.000000       0.039900       0.345000
57926     57926     guizhou        107.8803       25.4103          138       152     2012      01        29        029              0.198435       4.741730       0.119030       0.278234   -9999.000000   -9999.000000   -9999.000000       0.363000
57926     57926     guizhou        107.8803       25.4103          138       152     2012      01        30        030              0.193304       4.870300       0.051996       0.277513   -9999.000000       0.182900   -9999.000000       0.249000
57926     57926     guizhou        107.8803       25.4103          138       152     2012      01        31        031              0.190091       4.655609       0.000000       0.277156       0.103000   -9999.000000   -9999.000000       0.291000
57926     57926     guizhou        107.8803       25.4103          138       152     2012      02        01        032              0.189250       5.567047       1.596701       0.276235       0.089500       0.006500       0.034100   -9999.000000
57926     57926     guizhou        107.8803       25.4103          138       152     2012      02        02        033              0.191913       6.758820       1.342292       0.278976       0.081500       0.130000       0.033700       0.317000
57926     57926     guizhou        107.8803       25.4103          138       152     2012      02        03        034              0.190818       4.402435       0.837309       0.280496   -9999.000000   -9999.000000       0.031800   -9999.000000
57926     57926     guizhou        107.8803       25.4103          138       152     2012      02        04        035              0.190000       6.450897       1.101161       0.278882   -9999.000000       0.304800   -9999.000000       0.359000
57926     57926     guizhou        107.8803       25.4103          138       152     2012      02        05        036              0.196687       7.072052       2.415786       0.279486       0.095500   -9999.000000   -9999.000000       0.466000
57926     57926     guizhou        107.8803       25.4103          138       152     2012      02        06        037              0.199471       8.006409       0.000000       0.282870       0.083000   -9999.000000   -9999.000000   -9999.000000
57926     57926     guizhou        107.8803       25.4103          138       152     2012      02        07        038              0.194542       8.422791       0.000000       0.278280       0.086000       0.383400       0.035100       0.412000
57926     57926     guizhou        107.8803       25.4103          138       152     2012      02        08        039              0.190391       7.309753       0.000000       0.274226   -9999.000000   -9999.000000       0.035900   -9999.000000
57926     57926     guizhou        107.8803       25.4103          138       152     2012      02        09        040              0.189609       4.316650       2.097007       0.272804   -9999.000000       0.145400       0.036100       0.355000
57926     57926     guizhou        107.8803       25.4103          138       152     2012      02        10        041              0.188250       3.045868       0.144303       0.276422       0.089000   -9999.000000   -9999.000000       0.189000
57926     57926     guizhou        107.8803       25.4103          138       152     2012      02        11        042              0.186217       2.901703       1.282456       0.272541       0.120000   -9999.000000   -9999.000000       0.239000
57926     57926     guizhou        107.8803       25.4103          138       152     2012      02        12        043              0.188250       4.157593       3.084169       0.274383       0.123000       0.168600   -9999.000000       0.460000
57926     57926     guizhou        107.8803       25.4103          138       152     2012      02        13        044              0.202208       5.737213       3.413039       0.280220   -9999.000000   -9999.000000       0.035200   -9999.000000
57926     57926     guizhou        107.8803       25.4103          138       152     2012      02        14        045              0.213304       7.529938       1.474507       0.285062   -9999.000000       0.282900       0.040400       0.480000
57926     57926     guizhou        107.8803       25.4103          138       152     2012      02        15        046              0.216000       6.182617       0.538676       0.282936   -9999.000000   -9999.000000   -9999.000000       0.378000
57926     57926     guizhou        107.8803       25.4103          138       152     2012      02        16        047              0.215348       4.952728       0.000000       0.277768       0.122000   -9999.000000   -9999.000000       0.402000
57926     57926     guizhou        107.8803       25.4103          138       152     2012      02        17        048              0.213000       4.799469       0.000000       0.274746       0.122000       0.229300   -9999.000000       0.301000
57926     57926     guizhou        107.8803       25.4103          138       152     2012      02        18        049              0.000000       3.951172       0.000000       0.272821       0.110500   -9999.000000       0.039000   -9999.000000
57926     57926     guizhou        107.8803       25.4103          138       152     2012      02        19        050              0.206200       3.161621       0.266156       0.270479   -9999.000000       0.224700       0.040700       0.338000
57926     57926     guizhou        107.8803       25.4103          138       152     2012      02        20        051              0.206043       5.593994       2.994339       0.270345   -9999.000000       0.135400       0.033500   -9999.000000
57926     57926     guizhou        107.8803       25.4103          138       152     2012      02        21        052              0.211087       6.197968       1.466079       0.276052       0.076500   -9999.000000   -9999.000000       0.650000
57926     57926     guizhou        107.8803       25.4103          138       152     2012      02        22        053              0.216000       9.018799       3.892974       0.279693       0.074500       0.174100   -9999.000000       0.720000
57926     57926     guizhou        107.8803       25.4103          138       152     2012      02        23        054              0.000000      10.458344       1.345446       0.283442       0.070500   -9999.000000   -9999.000000   -9999.000000
57926     57926     guizhou        107.8803       25.4103          138       152     2012      02        24        055              0.216000       9.861938       1.172798       0.279319   -9999.000000       0.061000       0.033100       0.369000
57926     57926     guizhou        107.8803       25.4103          138       152     2012      02        25        056              0.212545       8.217712       1.529405       0.277522   -9999.000000       0.115900       0.034700   -9999.000000
57926     57926     guizhou        107.8803       25.4103          138       152     2012      02        26        057              0.208913       5.328674       0.320529       0.277145       0.084000   -9999.000000       0.034000       0.361000
57926     57926     guizhou        107.8803       25.4103          138       152     2012      02        27        058              0.206783       3.183563       0.955410       0.273608       0.078500       0.213300   -9999.000000       0.390000
57926     57926     guizhou        107.8803       25.4103          138       152     2012      02        28        059              0.204333       3.275177       0.725513       0.273679       0.077500   -9999.000000   -9999.000000       0.291000
57926     57926     guizhou        107.8803       25.4103          138       152     2012      02        29        060              0.000000   -9999.000000       0.059802   -9999.000000       0.072000   -9999.000000   -9999.000000   -9999.000000
57926     57926     guizhou        107.8803       25.4103          138       152     2012      03        01        061              0.197042       4.151459       0.205861       0.273004   -9999.000000       0.207100       0.029900   -9999.000000
57926     57926     guizhou        107.8803       25.4103          138       152     2012      03        02        062              0.193375       8.267517       1.864718       0.271095       0.106000   -9999.000000       0.031300       0.469000
57926     57926     guizhou        107.8803       25.4103          138       152     2012      03        03        063              0.204652       7.441925      12.419188       0.273350       0.108000       0.372700   -9999.000000   -9999.000000
57926     57926     guizhou        107.8803       25.4103          138       152     2012      03        04        064              0.282292       7.120880       3.163373       0.287320       0.095500       0.077900   -9999.000000       0.658000
57926     57926     guizhou        107.8803       25.4103          138       152     2012      03        05        065              0.272217       7.167023       0.166171       0.295831       0.091000   -9999.000000   -9999.000000       0.594000
57926     57926     guizhou        107.8803       25.4103          138       152     2012      03        06        066              0.264833      10.657257       1.331641       0.280255   -9999.000000       0.412200       0.049200   -9999.000000
57926     57926     guizhou        107.8803       25.4103          138       152     2012      03        07        067              0.000000       7.661713       1.514034       0.278565   -9999.000000   -9999.000000       0.050400       0.460000
57926     57926     guizhou        107.8803       25.4103          138       152     2012      03        08        068              0.254739       6.239014       1.514818       0.277443       0.108500       0.207300       0.048600   -9999.000000
57926     57926     guizhou        107.8803       25.4103          138       152     2012      03        09        069              0.248565       5.494263       0.000000       0.279731       0.101000       0.260000   -9999.000000       0.448000
57926     57926     guizhou        107.8803       25.4103          138       152     2012      03        10        070              0.238043       5.638702       0.000000       0.275263       0.089500   -9999.000000   -9999.000000       0.386000
57926     57926     guizhou        107.8803       25.4103          138       152     2012      03        11        071              0.225125       9.541687       0.000000       0.271087   -9999.000000       0.115700   -9999.000000       0.442000
57926     57926     guizhou        107.8803       25.4103          138       152     2012      03        12        072              0.216696      10.089813       0.159083       0.269196   -9999.000000   -9999.000000       0.033400       0.435000
57926     57926     guizhou        107.8803       25.4103          138       152     2012      03        13        073              0.208500       8.461700       0.129388       0.269381       0.099500       0.098400       0.035200   -9999.000000
57926     57926     guizhou        107.8803       25.4103          138       152     2012      03        14        074              0.205833      12.977692       3.075205       0.266832       0.098500       0.080500   -9999.000000       0.537000
57926     57926     guizhou        107.8803       25.4103          138       152     2012      03        15        075              0.209826      11.091644       0.450210       0.273853       0.089000   -9999.000000   -9999.000000       0.474000
57926     57926     guizhou        107.8803       25.4103          138       152     2012      03        16        076              0.209333      13.456360       0.063528       0.275804   -9999.000000       0.213700   -9999.000000       0.603000
57926     57926     guizhou        107.8803       25.4103          138       152     2012      03        17        077              0.200667      15.408203       0.823496       0.270791   -9999.000000   -9999.000000       0.032800       0.569000
57926     57926     guizhou        107.8803       25.4103          138       152     2012      03        18        078              0.192333      19.872070       0.307692       0.266544       0.091000       0.062000       0.034300   -9999.000000
57926     57926     guizhou        107.8803       25.4103          138       152     2012      03        19        079              0.179652      21.028656       0.000000       0.263367       0.085500       0.395100       0.060700       0.480000
57926     57926     guizhou        107.8803       25.4103          138       152     2012      03        20        080              0.169333      23.091553       0.144772       0.257582       0.085000   -9999.000000   -9999.000000   -9999.000000
57926     57926     guizhou        107.8803       25.4103          138       152     2012      03        21        081              0.163842      21.029633       0.616159       0.255495       0.073000       0.250500   -9999.000000       0.562000
57926     57926     guizhou        107.8803       25.4103          138       152     2012      03        22        082              0.164708      18.173981      13.564859       0.257357   -9999.000000       0.382600   -9999.000000       0.584000
57926     57926     guizhou        107.8803       25.4103          138       152     2012      03        23        083              0.179391      17.116638       0.445131       0.278553   -9999.000000   -9999.000000       0.061800   -9999.000000
57926     57926     guizhou        107.8803       25.4103          138       152     2012      03        24        084              0.169208      11.131866       0.504941       0.281206       0.074000       0.316900       0.058500       0.344000
57926     57926     guizhou        107.8803       25.4103          138       152     2012      03        25        085              0.000000      15.966400       0.437117       0.268991       0.069000   -9999.000000       0.060000   -9999.000000
57926     57926     guizhou        107.8803       25.4103          138       152     2012      03        26        086              0.147000      17.497955       0.441445       0.262968       0.069500       0.145800   -9999.000000   -9999.000000
57926     57926     guizhou        107.8803       25.4103          138       152     2012      03        27        087              0.147417      18.540619       9.390382       0.258654   -9999.000000       0.263000   -9999.000000       0.656000
57926     57926     guizhou        107.8803       25.4103          138       152     2012      03        28        088              0.172304      18.340912       6.529163       0.272136   -9999.000000   -9999.000000   -9999.000000       0.909000
57926     57926     guizhou        107.8803       25.4103          138       152     2012      03        29        089              0.191333      16.330353       3.531224       0.293003       0.088000       0.147800       0.073900       0.870000
57926     57926     guizhou        107.8803       25.4103          138       152     2012      03        30        090              0.226292      17.382019       6.952054       0.286237       0.080500   -9999.000000       0.072200   -9999.000000
57926     57926     guizhou        107.8803       25.4103          138       152     2012      03        31        091              0.196917      16.005890       0.124707       0.291598       0.066500       0.128200   -9999.000000       0.572000
57926     57926     guizhou        107.8803       25.4103          138       152     2012      04        01        092              0.169042      17.358734       3.337447       0.271663   -9999.000000       0.292700   -9999.000000   -9999.000000
57926     57926     guizhou        107.8803       25.4103          138       152     2012      04        02        093              0.154417      19.598358       0.000000       0.264036   -9999.000000   -9999.000000   -9999.000000       0.436000
57926     57926     guizhou        107.8803       25.4103          138       152     2012      04        03        094              0.145083      20.477051       0.133094       0.261886       0.096500       0.376800       0.055400       0.472000
57926     57926     guizhou        107.8803       25.4103          138       152     2012      04        04        095              0.217833      21.671967      18.171463       0.260008       0.082000   -9999.000000       0.058200   -9999.000000
57926     57926     guizhou        107.8803       25.4103          138       152     2012      04        05        096              0.296542      21.975800       2.287860       0.287572       0.097500       0.281600       0.062200       0.625000
57926     57926     guizhou        107.8803       25.4103          138       152     2012      04        06        097              0.288583      19.650116       0.536242       0.284866   -9999.000000       0.493500   -9999.000000   -9999.000000
57926     57926     guizhou        107.8803       25.4103          138       152     2012      04        07        098              0.264542      18.476929       0.145632       0.277616   -9999.000000   -9999.000000   -9999.000000       0.432000
57926     57926     guizhou        107.8803       25.4103          138       152     2012      04        08        099              0.252833      16.027954       0.680609       0.270634       0.100000       0.163000   -9999.000000       0.438000
57926     57926     guizhou        107.8803       25.4103          138       152     2012      04        09        100              0.241250      18.190643       0.000000       0.267465       0.091500       0.090600       0.093500       0.558000
57926     57926     guizhou        107.8803       25.4103          138       152     2012      04        10        101              0.221333      19.760223       0.561109       0.266506       0.089500   -9999.000000       0.092500       0.662000
57926     57926     guizhou        107.8803       25.4103          138       152     2012      04        11        102              0.199478      23.217316       0.000000       0.260264       0.093000       0.195000       0.091500   -9999.000000
57926     57926     guizhou        107.8803       25.4103          138       152     2012      04        12        103              0.245583      23.875732      14.066994       0.256684   -9999.000000   -9999.000000   -9999.000000       0.827000
57926     57926     guizhou        107.8803       25.4103          138       152     2012      04        13        104              0.299208      23.507660       0.000000       0.283336   -9999.000000       0.069900   -9999.000000   -9999.000000
57926     57926     guizhou        107.8803       25.4103          138       152     2012      04        14        105              0.289833      18.271881       0.518283       0.276074       0.125500       0.089100       0.106800       0.691000
57926     57926     guizhou        107.8803       25.4103          138       152     2012      04        15        106              0.281500      17.230103       0.000000       0.269741       0.115000   -9999.000000       0.099800       0.577000
57926     57926     guizhou        107.8803       25.4103          138       152     2012      04        16        107              0.279375      17.452148       6.842007       0.266129       0.092500       0.056100       0.140400   -9999.000000
57926     57926     guizhou        107.8803       25.4103          138       152     2012      04        17        108              0.322583      20.952026      26.409426       0.272515   -9999.000000   -9999.000000   -9999.000000       0.470000
57926     57926     guizhou        107.8803       25.4103          138       152     2012      04        18        109              0.329208      18.315460       0.540630       0.300213   -9999.000000       0.175700   -9999.000000   -9999.000000
57926     57926     guizhou        107.8803       25.4103          138       152     2012      04        19        110              0.330292      18.664337       4.077129       0.294802       0.107000       0.135600   -9999.000000       0.637000
57926     57926     guizhou        107.8803       25.4103          138       152     2012      04        20        111              0.324583      22.227448       0.000000       0.284824       0.102000   -9999.000000       0.127500       0.716000
57926     57926     guizhou        107.8803       25.4103          138       152     2012      04        21        112              0.298750      21.102356       0.000000       0.276584       0.082500       0.264600       0.130700   -9999.000000
57926     57926     guizhou        107.8803       25.4103          138       152     2012      04        22        113              0.261417      22.850952       0.000000       0.267419   -9999.000000   -9999.000000   -9999.000000       0.407000
57926     57926     guizhou        107.8803       25.4103          138       152     2012      04        23        114              0.238750      23.443268       0.000000       0.261736   -9999.000000       0.032000   -9999.000000   -9999.000000
57926     57926     guizhou        107.8803       25.4103          138       152     2012      04        24        115              0.221583      23.687958       0.259351       0.260862   -9999.000000       0.316400   -9999.000000       0.653000
57926     57926     guizhou        107.8803       25.4103          138       152     2012      04        25        116              0.000000      25.971619       0.000000       0.257598       0.108500   -9999.000000   -9999.000000       0.683000
57926     57926     guizhou        107.8803       25.4103          138       152     2012      04        26        117              0.200000      18.554230       0.000000       0.258952       0.093500       0.424900       0.094800       0.377000
57926     57926     guizhou        107.8803       25.4103          138       152     2012      04        27        118              0.189333      21.652649       0.000000       0.254571       0.092000       0.080200       0.089500       0.517000
57926     57926     guizhou        107.8803       25.4103          138       152     2012      04        28        119              0.226917      21.768005      58.055809       0.255132   -9999.000000   -9999.000000       0.095700   -9999.000000
57926     57926     guizhou        107.8803       25.4103          138       152     2012      04        29        120              0.320875      21.709351       0.000000       0.319155       0.116000       0.476000   -9999.000000       0.777000
57926     57926     guizhou        107.8803       25.4103          138       152     2012      04        30        121              0.298125      23.182587       0.000000       0.305867       0.099500   -9999.000000   -9999.000000   -9999.000000
57926     57926     guizhou        107.8803       25.4103          138       152     2012      05        01        122              0.267565      26.630432       4.141495       0.280653       0.146000       0.290000       0.127300       0.537000
57926     57926     guizhou        107.8803       25.4103          138       152     2012      05        02        123              0.265333      25.666931       0.479750       0.278949       0.148000       0.231600       0.126000       0.597000
57926     57926     guizhou        107.8803       25.4103          138       152     2012      05        03        124              0.279667      22.052765      10.436841       0.279872   -9999.000000   -9999.000000       0.124800   -9999.000000
57926     57926     guizhou        107.8803       25.4103          138       152     2012      05        04        125              0.308391      21.784210       0.663865       0.288016   -9999.000000       0.159900   -9999.000000       0.589000
57926     57926     guizhou        107.8803       25.4103          138       152     2012      05        05        126              0.324261      21.754486      14.935925       0.292950       0.154000   -9999.000000   -9999.000000   -9999.000000
57926     57926     guizhou        107.8803       25.4103          138       152     2012      05        06        127              0.309708      22.915649       0.412940       0.304864       0.148000       0.175100   -9999.000000       0.624000
57926     57926     guizhou        107.8803       25.4103          138       152     2012      05        07        128              0.282000      24.516174       0.000000       0.283483   -9999.000000       0.177900       0.127200       0.594000
57926     57926     guizhou        107.8803       25.4103          138       152     2012      05        08        129              0.258583      25.992096       0.112285       0.274255   -9999.000000   -9999.000000       0.128000       0.541000
57926     57926     guizhou        107.8803       25.4103          138       152     2012      05        09        130              0.246083      26.271729      16.443773       0.271469   -9999.000000       0.369100       0.114700       0.723000
57926     57926     guizhou        107.8803       25.4103          138       152     2012      05        10        131              0.240083      26.099915       4.620317       0.296236       0.164000   -9999.000000   -9999.000000   -9999.000000
57926     57926     guizhou        107.8803       25.4103          138       152     2012      05        11        132              0.245583      24.476837       1.573844       0.296547       0.165500       0.241800   -9999.000000       0.622000
57926     57926     guizhou        107.8803       25.4103          138       152     2012      05        12        133              0.277583      25.462952      15.235441       0.285101       0.172000       0.610800   -9999.000000       0.745000
57926     57926     guizhou        107.8803       25.4103          138       152     2012      05        13        134              0.286542      23.340515      21.374451       0.307813   -9999.000000   -9999.000000       0.113400       0.985000
57926     57926     guizhou        107.8803       25.4103          138       152     2012      05        14        135              0.326750      22.330963       1.895840       0.301017   -9999.000000       0.291500       0.170500       0.762000
57926     57926     guizhou        107.8803       25.4103          138       152     2012      05        15        136              0.314333      20.755829       0.115865       0.305525       0.172000       0.204600       0.161800   -9999.000000
57926     57926     guizhou        107.8803       25.4103          138       152     2012      05        16        137              0.299667      20.300964       0.000000       0.287855       0.162500   -9999.000000   -9999.000000       0.544000
57926     57926     guizhou        107.8803       25.4103          138       152     2012      05        17        138              0.281917      23.465393       0.000000       0.280893       0.160500       0.343800   -9999.000000   -9999.000000
57926     57926     guizhou        107.8803       25.4103          138       152     2012      05        18        139              0.267583      24.345367      26.492205       0.277464       0.154000   -9999.000000       0.102200       0.600000
57926     57926     guizhou        107.8803       25.4103          138       152     2012      05        19        140              0.330958      26.220245       6.124171       0.290266   -9999.000000       0.319800       0.158800       0.806000
57926     57926     guizhou        107.8803       25.4103          138       152     2012      05        20        141              0.314167      26.164978       1.251130       0.308522   -9999.000000   -9999.000000       0.166800   -9999.000000
57926     57926     guizhou        107.8803       25.4103          138       152     2012      05        21        142              0.320125      27.074249      13.113315       0.286914       0.174000   -9999.000000   -9999.000000       0.682000
57926     57926     guizhou        107.8803       25.4103          138       152     2012      05        22        143              0.350458      23.838257      43.623768       0.304514       0.189500       0.344000   -9999.000000   -9999.000000
57926     57926     guizhou        107.8803       25.4103          138       152     2012      05        23        144              0.360958      22.316650      15.370775       0.328272   -9999.000000   -9999.000000   -9999.000000       1.000000
57926     57926     guizhou        107.8803       25.4103          138       152     2012      05        24        145              0.368208      21.240082      38.410088       0.326741   -9999.000000       0.314100       0.123800       0.993000
57926     57926     guizhou        107.8803       25.4103          138       152     2012      05        25        146              0.000000      19.917999      14.236464       0.360106   -9999.000000       0.315200       0.117400       0.966000
57926     57926     guizhou        107.8803       25.4103          138       152     2012      05        26        147              0.357750      19.058075       4.706009       0.335512       0.161000   -9999.000000       0.116500       0.873000
57926     57926     guizhou        107.8803       25.4103          138       152     2012      05        27        148              0.343125      20.718231       0.687472       0.319805       0.154500       0.313300   -9999.000000   -9999.000000
57926     57926     guizhou        107.8803       25.4103          138       152     2012      05        28        149              0.334500      24.356628       0.086899       0.305248       0.135500   -9999.000000   -9999.000000       0.607000
57926     57926     guizhou        107.8803       25.4103          138       152     2012      05        29        150              0.341958      24.951935      14.066813       0.297736   -9999.000000       0.213900   -9999.000000   -9999.000000
57926     57926     guizhou        107.8803       25.4103          138       152     2012      05        30        151              0.342208      24.231171       0.849827       0.310324   -9999.000000       0.263300       0.110600   -9999.000000
57926     57926     guizhou        107.8803       25.4103          138       152     2012      05        31        152              0.331087      22.556824       0.076661       0.295674       0.163000   -9999.000000       0.109400   -9999.000000
57926     57926     guizhou        107.8803       25.4103          138       152     2012      06        01        153              0.315958      21.878326       0.099700       0.291198       0.229000       0.250600       0.116700   -9999.000000
57926     57926     guizhou        107.8803       25.4103          138       152     2012      06        02        154              0.303042      20.525848       0.031498       0.288066       0.205000       0.190500   -9999.000000       0.588000
57926     57926     guizhou        107.8803       25.4103          138       152     2012      06        03        155              0.289167      21.006378       1.141390       0.283816   -9999.000000   -9999.000000   -9999.000000   -9999.000000
57926     57926     guizhou        107.8803       25.4103          138       152     2012      06        04        156              0.297167      22.459869       4.696748       0.281806   -9999.000000       0.295800       0.096600       0.755000
57926     57926     guizhou        107.8803       25.4103          138       152     2012      06        05        157              0.312250      21.162720       4.908182       0.291346       0.223000   -9999.000000       0.092400       0.852000
57926     57926     guizhou        107.8803       25.4103          138       152     2012      06        06        158              0.323833      22.413696       0.226233       0.291887       0.218000       0.355600       0.094100       0.621000
57926     57926     guizhou        107.8803       25.4103          138       152     2012      06        07        159              0.343500      25.250275      15.372989       0.285344       0.211500       0.300800   -9999.000000       0.941000
57926     57926     guizhou        107.8803       25.4103          138       152     2012      06        08        160              0.353917      24.409149       3.897668       0.301215   -9999.000000   -9999.000000   -9999.000000   -9999.000000
57926     57926     guizhou        107.8803       25.4103          138       152     2012      06        09        161              0.322167      25.331512       0.407770       0.297742   -9999.000000       0.281600   -9999.000000       0.681000
57926     57926     guizhou        107.8803       25.4103          138       152     2012      06        10        162              0.345083      27.572083      21.991510       0.281928   -9999.000000   -9999.000000       0.094800       0.691000
57926     57926     guizhou        107.8803       25.4103          138       152     2012      06        11        163              0.000000      27.080627       0.105444       0.303502       0.158500       0.297000       0.074300       0.657000
57926     57926     guizhou        107.8803       25.4103          138       152     2012      06        12        164              0.333042      24.885864       3.033932       0.295051       0.150500       0.457000       0.074800       0.581000
57926     57926     guizhou        107.8803       25.4103          138       152     2012      06        13        165              0.311750      24.992249       3.509139       0.284666       0.138500   -9999.000000   -9999.000000   -9999.000000
57926     57926     guizhou        107.8803       25.4103          138       152     2012      06        14        166              0.293875      26.317749       0.000000       0.279651   -9999.000000       0.291400   -9999.000000       0.570000
57926     57926     guizhou        107.8803       25.4103          138       152     2012      06        15        167              0.275292      25.130463       0.000000       0.276941   -9999.000000   -9999.000000   -9999.000000   -9999.000000
57926     57926     guizhou        107.8803       25.4103          138       152     2012      06        16        168              0.260958      25.486145       0.000000       0.273890       0.144500       0.188000       0.068000       0.624000
57926     57926     guizhou        107.8803       25.4103          138       152     2012      06        17        169              0.245000      25.938385       0.000000       0.271142       0.132500       0.380500       0.069000       0.574000
57926     57926     guizhou        107.8803       25.4103          138       152     2012      06        18        170              0.228625      26.496063       0.297434       0.268830       0.123000   -9999.000000       0.084900   -9999.000000
57926     57926     guizhou        107.8803       25.4103          138       152     2012      06        19        171              0.225190      26.865295       0.339193       0.267639   -9999.000000       0.361500   -9999.000000       0.395000
57926     57926     guizhou        107.8803       25.4103          138       152     2012      06        20        172              0.211417      23.648163       0.000000       0.269923   -9999.000000       0.232000   -9999.000000   -9999.000000
57926     57926     guizhou        107.8803       25.4103          138       152     2012      06        21        173              0.207000      26.513245       0.497905       0.265563       0.180500   -9999.000000       0.085000       0.651000
57926     57926     guizhou        107.8803       25.4103          138       152     2012      06        22        174              0.215833      25.894562       7.736068       0.266411   -9999.000000       0.180800       0.090500       0.791000
57926     57926     guizhou        107.8803       25.4103          138       152     2012      06        23        175              0.239565      24.548615       1.591060       0.282430       0.203000   -9999.000000       0.093500       0.716000
57926     57926     guizhou        107.8803       25.4103          138       152     2012      06        24        176              0.246792      24.130096      17.238344       0.281641       0.196000       0.267300   -9999.000000       0.747000
57926     57926     guizhou        107.8803       25.4103          138       152     2012      06        25        177              0.295000      26.395599       3.137239       0.289871   -9999.000000       0.290700   -9999.000000   -9999.000000
57926     57926     guizhou        107.8803       25.4103          138       152     2012      06        26        178              0.341792      26.087372      34.714279       0.295162   -9999.000000   -9999.000000   -9999.000000       1.000000
57926     57926     guizhou        107.8803       25.4103          138       152     2012      06        27        179              0.353333      25.221069       2.952446       0.319246       0.196000       0.258700       0.068100   -9999.000000
57926     57926     guizhou        107.8803       25.4103          138       152     2012      06        28        180              0.359875      25.024811      23.953493       0.300127   -9999.000000   -9999.000000       0.068300       0.961000
57926     57926     guizhou        107.8803       25.4103          138       152     2012      06        29        181              0.344250      25.351440       2.992177       0.313276       0.174000       0.249100       0.064600       0.792000
57926     57926     guizhou        107.8803       25.4103          138       152     2012      06        30        182              0.320125      27.218842       1.472412       0.297209   -9999.000000       0.198900   -9999.000000   -9999.000000
57926     57926     guizhou        107.8803       25.4103          138       152     2012      07        01        183              0.308500      28.099640       0.281361       0.287305   -9999.000000   -9999.000000   -9999.000000       0.599000
57926     57926     guizhou        107.8803       25.4103          138       152     2012      07        02        184              0.288208      26.355255       2.624125       0.282996       0.191500       0.204500       0.091600   -9999.000000
57926     57926     guizhou        107.8803       25.4103          138       152     2012      07        03        185              0.268458      26.748566       0.199557       0.278376       0.177500   -9999.000000       0.085600       0.545000
57926     57926     guizhou        107.8803       25.4103          138       152     2012      07        04        186              0.257000      27.125488       0.075999       0.274080       0.162000       0.150400       0.085600       0.480000
57926     57926     guizhou        107.8803       25.4103          138       152     2012      07        05        187              0.247375      27.122528       0.000000       0.270871   -9999.000000       0.368000   -9999.000000       0.616000
57926     57926     guizhou        107.8803       25.4103          138       152     2012      07        06        188              0.232542      27.727356       0.000000       0.267583   -9999.000000   -9999.000000   -9999.000000       0.693000
57926     57926     guizhou        107.8803       25.4103          138       152     2012      07        07        189              0.227875      28.664429       0.453739       0.264277   -9999.000000       0.353200   -9999.000000   -9999.000000
57926     57926     guizhou        107.8803       25.4103          138       152     2012      07        08        190              0.242208      28.253296       0.610992       0.262605       0.176000   -9999.000000       0.083200       0.453000
57926     57926     guizhou        107.8803       25.4103          138       152     2012      07        09        191              0.231917      27.216858       1.049564       0.263220       0.154000   -9999.000000       0.070800   -9999.000000
57926     57926     guizhou        107.8803       25.4103          138       152     2012      07        10        192              0.222087      27.136688       0.000000       0.262057   -9999.000000       0.325100       0.070500       0.582000
57926     57926     guizhou        107.8803       25.4103          138       152     2012      07        11        193              0.211125      28.169525       0.117192       0.259593   -9999.000000   -9999.000000   -9999.000000       0.476000
57926     57926     guizhou        107.8803       25.4103          138       152     2012      07        12        194              0.211542      28.832672       0.963156       0.256874       0.199000       0.316000   -9999.000000   -9999.000000
57926     57926     guizhou        107.8803       25.4103          138       152     2012      07        13        195              0.288000      27.884918       8.366116       0.257146       0.192500       0.210400   -9999.000000       0.374000
57926     57926     guizhou        107.8803       25.4103          138       152     2012      07        14        196              0.338500      26.815094       6.019771       0.271909       0.188000   -9999.000000       0.071500   -9999.000000
57926     57926     guizhou        107.8803       25.4103          138       152     2012      07        15        197              0.337250      27.276886       4.184522       0.283895       0.174000       0.239000       0.040100       0.738000
57926     57926     guizhou        107.8803       25.4103          138       152     2012      07        16        198              0.356042      28.224731      23.834011       0.278624   -9999.000000   -9999.000000       0.098800       0.900000
57926     57926     guizhou        107.8803       25.4103          138       152     2012      07        17        199              0.354167      26.184814      19.855164       0.310731   -9999.000000       0.169800   -9999.000000   -9999.000000
57926     57926     guizhou        107.8803       25.4103          138       152     2012      07        18        200              0.365792      26.258759      18.282413       0.306617       0.205500       0.142500   -9999.000000       0.793000
57926     57926     guizhou        107.8803       25.4103          138       152     2012      07        19        201              0.349917      26.495270       0.373606       0.317071       0.190500   -9999.000000       0.102000   -9999.000000
57926     57926     guizhou        107.8803       25.4103          138       152     2012      07        20        202              0.330208      27.531403       0.000000       0.289395       0.158500       0.339100       0.100200       0.651000
57926     57926     guizhou        107.8803       25.4103          138       152     2012      07        21        203              0.290833      28.523376       0.000000       0.278308   -9999.000000   -9999.000000       0.101300       0.678000
57926     57926     guizhou        107.8803       25.4103          138       152     2012      07        22        204              0.263500      29.191986       6.503044       0.272150   -9999.000000       0.127500   -9999.000000       0.440000
57926     57926     guizhou        107.8803       25.4103          138       152     2012      07        23        205              0.273565      29.353577      12.129111       0.278931       0.287000       0.183000   -9999.000000       0.671000
57926     57926     guizhou        107.8803       25.4103          138       152     2012      07        24        206              0.303708      27.333008      10.174547       0.301418       0.285000   -9999.000000   -9999.000000   -9999.000000
57926     57926     guizhou        107.8803       25.4103          138       152     2012      07        25        207              0.338250      26.022461       8.983664       0.297479       0.285500       0.407200       0.072200       0.792000
57926     57926     guizhou        107.8803       25.4103          138       152     2012      07        26        208              0.356542      26.598541      20.159899       0.301242   -9999.000000       0.113700       0.072900   -9999.000000
57926     57926     guizhou        107.8803       25.4103          138       152     2012      07        27        209              0.355958      26.175018      29.286301       0.315043   -9999.000000   -9999.000000       0.068100       0.724000
57926     57926     guizhou        107.8803       25.4103          138       152     2012      07        28        210              0.362583      26.118042      13.748837       0.321559   -9999.000000       0.304500   -9999.000000       0.753000
57926     57926     guizhou        107.8803       25.4103          138       152     2012      07        29        211              0.350708      26.262939       5.268156       0.317684       0.281000   -9999.000000   -9999.000000   -9999.000000
57926     57926     guizhou        107.8803       25.4103          138       152     2012      07        30        212              0.327583      26.660828       0.186318       0.307393       0.268500       0.394200   -9999.000000       0.566000
57926     57926     guizhou        107.8803       25.4103          138       152     2012      07        31        213              0.288875      28.010956       0.498666       0.294835       0.236500       0.127400       0.147600   -9999.000000
57926     57926     guizhou        107.8803       25.4103          138       152     2012      08        01        214              0.250125      28.921539       1.029146       0.289187   -9999.000000   -9999.000000       0.149900       0.681000
57926     57926     guizhou        107.8803       25.4103          138       152     2012      08        02        215              0.224333      28.755341       0.371757       0.284812   -9999.000000       0.292700       0.138500       0.586000
57926     57926     guizhou        107.8803       25.4103          138       152     2012      08        03        216              0.204875      28.404877       0.000000       0.278901       0.282500   -9999.000000   -9999.000000       0.555000
57926     57926     guizhou        107.8803       25.4103          138       152     2012      08        04        217              0.190833      27.791626       0.000000       0.272629       0.266000       0.183300   -9999.000000       0.655000
57926     57926     guizhou        107.8803       25.4103          138       152     2012      08        05        218              0.198458      27.296692       7.060259       0.269634       0.279000       0.285400       0.156500   -9999.000000
57926     57926     guizhou        107.8803       25.4103          138       152     2012      08        06        219              0.345542      26.149384      13.623343       0.283500   -9999.000000   -9999.000000       0.127300       0.665000
57926     57926     guizhou        107.8803       25.4103          138       152     2012      08        07        220              0.345083      25.145874       5.644423       0.305000   -9999.000000       0.311000       0.128900   -9999.000000
57926     57926     guizhou        107.8803       25.4103          138       152     2012      08        08        221              0.306708      25.853363       0.000000       0.294554       0.281000   -9999.000000   -9999.000000       0.643000
57926     57926     guizhou        107.8803       25.4103          138       152     2012      08        09        222              0.254375      27.100220       0.000000       0.278570       0.267500       0.133700   -9999.000000       0.604000
57926     57926     guizhou        107.8803       25.4103          138       152     2012      08        10        223              0.220417      27.602966       0.000000       0.271150       0.266000       0.245300   -9999.000000   -9999.000000
57926     57926     guizhou        107.8803       25.4103          138       152     2012      08        11        224              0.200000      27.792145       0.000000       0.267345       0.222500   -9999.000000       0.123500       0.421000
57926     57926     guizhou        107.8803       25.4103          138       152     2012      08        12        225              0.185833      29.059875       1.095194       0.264595   -9999.000000       0.316300       0.125900   -9999.000000
57926     57926     guizhou        107.8803       25.4103          138       152     2012      08        13        226              0.190417      28.936951       6.491014       0.265179   -9999.000000   -9999.000000       0.157700       0.581000
57926     57926     guizhou        107.8803       25.4103          138       152     2012      08        14        227              0.205708      28.939880       3.425726       0.274927       0.234500       0.062800   -9999.000000       0.591000
57926     57926     guizhou        107.8803       25.4103          138       152     2012      08        15        228              0.186583      27.736237       0.358472       0.281452       0.225000       0.445900   -9999.000000   -9999.000000
57926     57926     guizhou        107.8803       25.4103          138       152     2012      08        16        229              0.171375      28.961365       0.800084       0.268118       0.197000   -9999.000000   -9999.000000       0.399000
57926     57926     guizhou        107.8803       25.4103          138       152     2012      08        17        230              0.163958      29.706696       1.882568       0.261918   -9999.000000       0.154300       0.162100   -9999.000000
57926     57926     guizhou        107.8803       25.4103          138       152     2012      08        18        231              0.163792      27.966217       9.929854       0.264435   -9999.000000       0.165500       0.167300       0.772000
57926     57926     guizhou        107.8803       25.4103          138       152     2012      08        19        232              0.167625      27.178375       2.022014       0.283507       0.228000   -9999.000000       0.156300       0.732000
57926     57926     guizhou        107.8803       25.4103          138       152     2012      08        20        233              0.165625      27.642853       0.558872       0.278251       0.220000       0.228100   -9999.000000       0.496000
57926     57926     guizhou        107.8803       25.4103          138       152     2012      08        21        234              0.173208      27.997681       6.175702       0.268620       0.265000   -9999.000000   -9999.000000       0.815000
57926     57926     guizhou        107.8803       25.4103          138       152     2012      08        22        235              0.170500      26.796814       0.349678       0.281980       0.280000       0.226100       0.100200   -9999.000000
57926     57926     guizhou        107.8803       25.4103          138       152     2012      08        23        236              0.167167      23.293793       0.000000       0.270223   -9999.000000       0.215500       0.099000       0.402000
57926     57926     guizhou        107.8803       25.4103          138       152     2012      08        24        237              0.162792      22.972961       0.000000       0.265053   -9999.000000   -9999.000000       0.092900   -9999.000000
57926     57926     guizhou        107.8803       25.4103          138       152     2012      08        25        238              0.000000      24.051056       0.000000       0.260702       0.251500       0.219700   -9999.000000       0.440000
57926     57926     guizhou        107.8803       25.4103          138       152     2012      08        26        239              0.156625      25.247498       0.000000       0.256686       0.257000   -9999.000000   -9999.000000       0.505000
57926     57926     guizhou        107.8803       25.4103          138       152     2012      08        27        240              0.153208      26.045990       0.000000       0.252469       0.227000       0.178500   -9999.000000   -9999.000000
57926     57926     guizhou        107.8803       25.4103          138       152     2012      08        28        241              0.150333      25.858765       0.000000       0.250148   -9999.000000       0.204300       0.128900       0.493000
57926     57926     guizhou        107.8803       25.4103          138       152     2012      08        29        242              0.146958      27.540405       0.000000       0.244779   -9999.000000   -9999.000000       0.130800   -9999.000000
57926     57926     guizhou        107.8803       25.4103          138       152     2012      08        30        243              0.143250      28.376801       0.631966       0.242004       0.270500       0.265500       0.129100       0.458000
57926     57926     guizhou        107.8803       25.4103          138       152     2012      08        31        244              0.140750      28.817200       1.173321       0.239547       0.257500       0.151500   -9999.000000       0.468000
57926     57926     guizhou        107.8803       25.4103          138       152     2012      09        01        245              0.148750      28.032776       3.324507       0.239883       0.225000       0.307200   -9999.000000       0.508000
57926     57926     guizhou        107.8803       25.4103          138       152     2012      09        02        246              0.150500      27.233704      13.749931       0.256255       0.165000       0.290500       0.140300       0.578000
57926     57926     guizhou        107.8803       25.4103          138       152     2012      09        03        247              0.148750      25.669006       0.156412       0.286945   -9999.000000   -9999.000000       0.078200   -9999.000000
57926     57926     guizhou        107.8803       25.4103          138       152     2012      09        04        248              0.145417      22.928894       0.000000       0.266764       0.217000       0.390000       0.075800       0.389000
57926     57926     guizhou        107.8803       25.4103          138       152     2012      09        05        249              0.142333      24.284637       0.000000       0.256707       0.208500       0.199600   -9999.000000       0.431000
57926     57926     guizhou        107.8803       25.4103          138       152     2012      09        06        250              0.140955      25.366028       2.372255       0.252059       0.222500   -9999.000000   -9999.000000       0.477000
57926     57926     guizhou        107.8803       25.4103          138       152     2012      09        07        251              0.140625      25.830872       0.117829       0.249345       0.226000       0.250800   -9999.000000       0.460000
57926     57926     guizhou        107.8803       25.4103          138       152     2012      09        08        252              0.140417      27.126740       0.356034       0.246285   -9999.000000   -9999.000000       0.074300   -9999.000000
57926     57926     guizhou        107.8803       25.4103          138       152     2012      09        09        253              0.139333      27.279327       0.404710       0.243612   -9999.000000       0.226400       0.077000       0.393000
57926     57926     guizhou        107.8803       25.4103          138       152     2012      09        10        254              0.137739      27.502716       0.000000       0.239748       0.219500       0.166800       0.065000   -9999.000000
57926     57926     guizhou        107.8803       25.4103          138       152     2012      09        11        255              0.136625      27.663788       0.281290       0.234105       0.153500   -9999.000000   -9999.000000       0.485000
57926     57926     guizhou        107.8803       25.4103          138       152     2012      09        12        256              0.143870      26.881287       8.465757       0.232573       0.193000       0.165100   -9999.000000       0.453000
57926     57926     guizhou        107.8803       25.4103          138       152     2012      09        13        257              0.150000      24.188110       3.297032       0.262239   -9999.000000   -9999.000000   -9999.000000   -9999.000000
57926     57926     guizhou        107.8803       25.4103          138       152     2012      09        14        258              0.147583      20.201599       1.638858       0.267180   -9999.000000       0.158100       0.064400       0.113000
57926     57926     guizhou        107.8803       25.4103          138       152     2012      09        15        259              0.142792      21.737152       0.000000       0.253539       0.166000       0.196300       0.065400   -9999.000000
57926     57926     guizhou        107.8803       25.4103          138       152     2012      09        16        260              0.138333      22.864349       0.320272       0.246055       0.173000   -9999.000000       0.065200       0.424000
57926     57926     guizhou        107.8803       25.4103          138       152     2012      09        17        261              0.136000      21.683838       0.340010       0.243026       0.177500       0.366600   -9999.000000       0.453000
57926     57926     guizhou        107.8803       25.4103          138       152     2012      09        18        262              0.136167      19.822968       1.325114       0.246610       0.182000   -9999.000000   -9999.000000       0.434000
57926     57926     guizhou        107.8803       25.4103          138       152     2012      09        19        263              0.166500      19.411285       2.276242       0.249805   -9999.000000       0.423000       0.048200       0.641000
57926     57926     guizhou        107.8803       25.4103          138       152     2012      09        20        264              0.195667      19.430389       5.361037       0.260614   -9999.000000       0.369100       0.051400   -9999.000000
57926     57926     guizhou        107.8803       25.4103          138       152     2012      09        21        265              0.195917      19.944763       4.806561       0.272144   -9999.000000   -9999.000000       0.049600       0.849000
57926     57926     guizhou        107.8803       25.4103          138       152     2012      09        22        266              0.252625      20.801849       6.387539       0.274864       0.198000       0.262300   -9999.000000   -9999.000000
57926     57926     guizhou        107.8803       25.4103          138       152     2012      09        23        267              0.262833      20.886505      10.134062       0.287295       0.174000       0.162700   -9999.000000       0.586000
57926     57926     guizhou        107.8803       25.4103          138       152     2012      09        24        268              0.253208      20.581696       0.094984       0.295476   -9999.000000   -9999.000000   -9999.000000       0.624000
57926     57926     guizhou        107.8803       25.4103          138       152     2012      09        25        269              0.234792      20.813019       1.217930       0.276937   -9999.000000       0.443400       0.076100   -9999.000000
57926     57926     guizhou        107.8803       25.4103          138       152     2012      09        26        270              0.213375      22.320343       0.589500       0.269423       0.180500   -9999.000000       0.080100       0.551000
57926     57926     guizhou        107.8803       25.4103          138       152     2012      09        27        271              0.198500      23.791595       0.064224       0.263942       0.170000       0.223400       0.078500   -9999.000000
57926     57926     guizhou        107.8803       25.4103          138       152     2012      09        28        272              0.179867      21.789856       0.000000       0.260995       0.168000   -9999.000000   -9999.000000       0.427000
57926     57926     guizhou        107.8803       25.4103          138       152     2012      09        29        273              0.171250      21.553925       0.000000       0.256433       0.147000   -9999.000000   -9999.000000       0.490000
57926     57926     guizhou        107.8803       25.4103          138       152     2012      09        30        274              0.161708      21.934235       1.378778       0.250437   -9999.000000       0.220800   -9999.000000       0.431000
57926     57926     guizhou        107.8803       25.4103          138       152     2012      10        01        275              0.154250      21.990021       0.000000       0.246849       0.116000   -9999.000000       0.103700       0.589000
57926     57926     guizhou        107.8803       25.4103          138       152     2012      10        02        276              0.148875      22.608521       0.126421       0.243166       0.113500       0.187300       0.109500   -9999.000000
57926     57926     guizhou        107.8803       25.4103          138       152     2012      10        03        277              0.145542      23.639832       3.850703       0.240238       0.125000       0.262100       0.111200       0.524000
57926     57926     guizhou        107.8803       25.4103          138       152     2012      10        04        278              0.183417      21.249603      10.463015       0.249321       0.142000   -9999.000000   -9999.000000       0.716000
57926     57926     guizhou        107.8803       25.4103          138       152     2012      10        05        279              0.240750      19.154022       4.868086       0.286418   -9999.000000       0.472000   -9999.000000       0.692000
57926     57926     guizhou        107.8803       25.4103          138       152     2012      10        06        280              0.234417      18.437012       0.319326       0.284911   -9999.000000   -9999.000000       0.115700       0.674000
57926     57926     guizhou        107.8803       25.4103          138       152     2012      10        07        281              0.217000      18.050873       0.000000       0.271767       0.130000       0.341400       0.111600   -9999.000000
57926     57926     guizhou        107.8803       25.4103          138       152     2012      10        08        282              0.196083      20.300018       2.354152       0.264984       0.126500       0.487200       0.065400       0.405000
57926     57926     guizhou        107.8803       25.4103          138       152     2012      10        09        283              0.185042      22.637451       0.490371       0.258983       0.118500   -9999.000000   -9999.000000   -9999.000000
57926     57926     guizhou        107.8803       25.4103          138       152     2012      10        10        284              0.176750      19.332001       0.000000       0.259930   -9999.000000       0.245500   -9999.000000       0.534000
57926     57926     guizhou        107.8803       25.4103          138       152     2012      10        11        285              0.169167      20.920105       0.482629       0.254835   -9999.000000       0.115300   -9999.000000       0.443000
57926     57926     guizhou        107.8803       25.4103          138       152     2012      10        12        286              0.163667      21.532623       0.000000       0.252595       0.171000   -9999.000000       0.068700   -9999.000000
57926     57926     guizhou        107.8803       25.4103          138       152     2012      10        13        287              0.159083      22.301483       0.557315       0.250075       0.192000       0.244100       0.068700       0.327000
57926     57926     guizhou        107.8803       25.4103          138       152     2012      10        14        288              0.158000      18.844666       0.150219       0.252634       0.179000   -9999.000000       0.067000   -9999.000000
57926     57926     guizhou        107.8803       25.4103          138       152     2012      10        15        289              0.158000      20.059387       0.558948       0.253011       0.174000       0.210900   -9999.000000       0.595000
57926     57926     guizhou        107.8803       25.4103          138       152     2012      10        16        290              0.159750      21.413666       7.239294       0.253861   -9999.000000       0.235200   -9999.000000       0.520000
57926     57926     guizhou        107.8803       25.4103          138       152     2012      10        17        291              0.156458      20.556061       0.000000       0.276272   -9999.000000   -9999.000000   -9999.000000       0.342000
57926     57926     guizhou        107.8803       25.4103          138       152     2012      10        18        292              0.151375      19.523285       0.000000       0.259739       0.168000       0.212900       0.101800       0.538000
57926     57926     guizhou        107.8803       25.4103          138       152     2012      10        19        293              0.150000      20.458618       0.045517       0.252874       0.173000   -9999.000000       0.098300   -9999.000000
57926     57926     guizhou        107.8803       25.4103          138       152     2012      10        20        294              0.149917      20.123688       0.000000       0.253463       0.148000       0.110200       0.100000       0.440000
57926     57926     guizhou        107.8803       25.4103          138       152     2012      10        21        295              0.149917      22.643097       0.160708       0.251064   -9999.000000       0.294300   -9999.000000   -9999.000000
57926     57926     guizhou        107.8803       25.4103          138       152     2012      10        22        296              0.149833      23.257690       0.369132       0.249452   -9999.000000   -9999.000000   -9999.000000       0.327000
57926     57926     guizhou        107.8803       25.4103          138       152     2012      10        23        297              0.148000      22.101654       0.000000       0.248262   -9999.000000       0.350500       0.055600       0.356000
57926     57926     guizhou        107.8803       25.4103          138       152     2012      10        24        298              0.146917      18.734161       0.926819       0.247446   -9999.000000   -9999.000000       0.056300   -9999.000000
57926     57926     guizhou        107.8803       25.4103          138       152     2012      10        25        299              0.000000      18.128693       0.000000       0.248532       0.165000       0.258400       0.057500       0.318000
57926     57926     guizhou        107.8803       25.4103          138       152     2012      10        26        300              0.142545      20.931885       0.000000       0.247368       0.155000       0.272500   -9999.000000   -9999.000000
57926     57926     guizhou        107.8803       25.4103          138       152     2012      10        27        301              0.140429      22.105042       0.555124       0.245380   -9999.000000   -9999.000000   -9999.000000       0.403000
57926     57926     guizhou        107.8803       25.4103          138       152     2012      10        28        302              0.000000      22.203552      18.535219       0.244174       0.174000       0.348000   -9999.000000       0.446000
57926     57926     guizhou        107.8803       25.4103          138       152     2012      10        29        303              0.262458      19.893951       2.164757       0.291259       0.183500   -9999.000000       0.138000       0.530000
57926     57926     guizhou        107.8803       25.4103          138       152     2012      10        30        304              0.235368      20.223022       0.721509       0.284313       0.177500   -9999.000000       0.139400       0.466000
57926     57926     guizhou        107.8803       25.4103          138       152     2012      10        31        305              0.213208      16.427277       0.000000       0.272778       0.157000       0.137100       0.137100   -9999.000000
57926     57926     guizhou        107.8803       25.4103          138       152     2012      11        01        306              0.195304      17.393982       0.000000       0.263496   -9999.000000   -9999.000000   -9999.000000       0.302000
57926     57926     guizhou        107.8803       25.4103          138       152     2012      11        02        307              0.182250      17.602478       0.000000       0.259211   -9999.000000       0.151500   -9999.000000   -9999.000000
57926     57926     guizhou        107.8803       25.4103          138       152     2012      11        03        308              0.174375      18.518677       0.000000       0.254928       0.145000       0.213200   -9999.000000       0.427000
57926     57926     guizhou        107.8803       25.4103          138       152     2012      11        04        309              0.166708      18.548096       2.535415       0.253748       0.135000   -9999.000000       0.132000       0.381000
57926     57926     guizhou        107.8803       25.4103          138       152     2012      11        05        310              0.191333      19.086395      19.454132       0.250394       0.127000       0.170800       0.161900   -9999.000000
57926     57926     guizhou        107.8803       25.4103          138       152     2012      11        06        311              0.303167      16.202789       8.747922       0.277044   -9999.000000   -9999.000000   -9999.000000       0.546000
57926     57926     guizhou        107.8803       25.4103          138       152     2012      11        07        312              0.312708      14.497375      12.523509       0.301197   -9999.000000       0.184500   -9999.000000   -9999.000000
57926     57926     guizhou        107.8803       25.4103          138       152     2012      11        08        313              0.310125      13.947174       1.615001       0.305854       0.179000       0.238500   -9999.000000       0.597000
57926     57926     guizhou        107.8803       25.4103          138       152     2012      11        09        314              0.303000      14.124939       0.571601       0.289420       0.161500   -9999.000000       0.152500       0.632000
57926     57926     guizhou        107.8803       25.4103          138       152     2012      11        10        315              0.298500      14.011444       0.000000       0.280543       0.142000       0.414900       0.152600   -9999.000000
57926     57926     guizhou        107.8803       25.4103          138       152     2012      11        11        316              0.289833      15.304688       0.000000       0.271738       0.137000   -9999.000000       0.151500       0.210000
57926     57926     guizhou        107.8803       25.4103          138       152     2012      11        12        317              0.282583      14.501801       0.000000       0.266343   -9999.000000       0.194700   -9999.000000   -9999.000000
57926     57926     guizhou        107.8803       25.4103          138       152     2012      11        13        318              0.000000      14.881042       0.000000       0.263624   -9999.000000       0.118100   -9999.000000       0.410000
57926     57926     guizhou        107.8803       25.4103          138       152     2012      11        14        319              0.277667      15.512421       1.255402       0.261655       0.155500   -9999.000000   -9999.000000       0.451000
57926     57926     guizhou        107.8803       25.4103          138       152     2012      11        15        320              0.298208      15.985931       8.488459       0.263856       0.150500       0.454200       0.164700       0.730000
57926     57926     guizhou        107.8803       25.4103          138       152     2012      11        16        321              0.338458      17.370544      33.591286       0.277177       0.141000       0.177400       0.155200       0.845000
57926     57926     guizhou        107.8803       25.4103          138       152     2012      11        17        322              0.000000      13.254303       0.000000       0.323972   -9999.000000   -9999.000000       0.151200   -9999.000000
57926     57926     guizhou        107.8803       25.4103          138       152     2012      11        18        323              0.314167      14.189209       8.921611       0.287511   -9999.000000       0.302700   -9999.000000       0.392000
57926     57926     guizhou        107.8803       25.4103          138       152     2012      11        19        324              0.311000      14.877197       0.145315       0.276760       0.160000   -9999.000000   -9999.000000   -9999.000000
57926     57926     guizhou        107.8803       25.4103          138       152     2012      11        20        325              0.311000      14.357086       3.642268       0.272805       0.155000       0.294500       0.090200       0.521000
57926     57926     guizhou        107.8803       25.4103          138       152     2012      11        21        326              0.307333      15.613800       0.109510       0.270908       0.129000       0.334700       0.088500       0.449000
57926     57926     guizhou        107.8803       25.4103          138       152     2012      11        22        327              0.303500      14.185394       0.184925       0.268588       0.127000   -9999.000000       0.085500   -9999.000000
57926     57926     guizhou        107.8803       25.4103          138       152     2012      11        23        328              0.298875      12.566406       0.000000       0.267442   -9999.000000       0.136500   -9999.000000       0.311000
57926     57926     guizhou        107.8803       25.4103          138       152     2012      11        24        329              0.295917      11.016449       1.105521       0.265893       0.122000   -9999.000000   -9999.000000   -9999.000000
57926     57926     guizhou        107.8803       25.4103          138       152     2012      11        25        330              0.302875      11.354370       0.175875       0.268176       0.133000       0.116900   -9999.000000       0.343000
57926     57926     guizhou        107.8803       25.4103          138       152     2012      11        26        331              0.293833      12.727173       0.000000       0.268402       0.128500       0.245000   -9999.000000       0.455000
57926     57926     guizhou        107.8803       25.4103          138       152     2012      11        27        332              0.281542      11.476685       0.490195       0.264400       0.128000   -9999.000000       0.090100       0.394000
57926     57926     guizhou        107.8803       25.4103          138       152     2012      11        28        333              0.271167      11.470551       0.000000       0.264459   -9999.000000       0.527700       0.090300       0.331000
57926     57926     guizhou        107.8803       25.4103          138       152     2012      11        29        334              0.267833      11.794434       3.590953       0.264359   -9999.000000   -9999.000000   -9999.000000   -9999.000000
57926     57926     guizhou        107.8803       25.4103          138       152     2012      11        30        335              0.268500      11.571045       4.859140       0.272530       0.145500       0.186200   -9999.000000       0.440000
57926     57926     guizhou        107.8803       25.4103          138       152     2012      12        01        336              0.265667       9.813080       0.600517       0.279597       0.135500       0.152000   -9999.000000   -9999.000000
57926     57926     guizhou        107.8803       25.4103          138       152     2012      12        02        337              0.256792       9.190216       0.000000       0.277317       0.105000   -9999.000000       0.092100       0.449000
57926     57926     guizhou        107.8803       25.4103          138       152     2012      12        03        338              0.246500      12.076294       0.000000       0.269342   -9999.000000       0.480500       0.110500       0.433000
57926     57926     guizhou        107.8803       25.4103          138       152     2012      12        04        339              0.238417      11.108185       0.000000       0.266385   -9999.000000       0.293500       0.112800   -9999.000000
57926     57926     guizhou        107.8803       25.4103          138       152     2012      12        05        340              0.227917      10.883453       0.000000       0.264665       0.131000   -9999.000000   -9999.000000       0.126000
57926     57926     guizhou        107.8803       25.4103          138       152     2012      12        06        341              0.219958      11.444733       0.000000       0.261869       0.128000       0.317100   -9999.000000   -9999.000000
57926     57926     guizhou        107.8803       25.4103          138       152     2012      12        07        342              0.216500      11.981598       1.098427       0.260883       0.130500   -9999.000000       0.111500       0.312000
57926     57926     guizhou        107.8803       25.4103          138       152     2012      12        08        343              0.213625      11.768402       1.943586       0.261017       0.130000       0.388200       0.114200       0.326000
57926     57926     guizhou        107.8803       25.4103          138       152     2012      12        09        344              0.213000      11.903870       7.153526       0.260675   -9999.000000       0.199700       0.119600   -9999.000000
57926     57926     guizhou        107.8803       25.4103          138       152     2012      12        10        345              0.231500      10.214508       4.421257       0.277205   -9999.000000   -9999.000000   -9999.000000       0.193000
57926     57926     guizhou        107.8803       25.4103          138       152     2012      12        11        346              0.251333       7.950104       0.422016       0.285121       0.142500       0.182400   -9999.000000   -9999.000000
57926     57926     guizhou        107.8803       25.4103          138       152     2012      12        12        347              0.243667       8.140472       0.707112       0.274867       0.143000   -9999.000000   -9999.000000       0.376000
57926     57926     guizhou        107.8803       25.4103          138       152     2012      12        13        348              0.241500       8.133392       0.139576       0.271452       0.119000       0.239500       0.067000       0.478000
57926     57926     guizhou        107.8803       25.4103          138       152     2012      12        14        349              0.234833      11.305969       2.308769       0.270703   -9999.000000       0.359200       0.069300       0.410000
57926     57926     guizhou        107.8803       25.4103          138       152     2012      12        15        350              0.000000      16.044342       1.230667       0.267191   -9999.000000   -9999.000000       0.068400       0.544000
57926     57926     guizhou        107.8803       25.4103          138       152     2012      12        16        351              0.217042      16.196564       0.073540       0.264228       0.145500       0.305400   -9999.000000   -9999.000000
57926     57926     guizhou        107.8803       25.4103          138       152     2012      12        17        352              0.212083      11.826630       0.869019       0.263283       0.141000   -9999.000000   -9999.000000       0.285000
57926     57926     guizhou        107.8803       25.4103          138       152     2012      12        18        353              0.208333       8.613007       0.000000       0.265144       0.137000       0.221400   -9999.000000   -9999.000000
57926     57926     guizhou        107.8803       25.4103          138       152     2012      12        19        354              0.206167       6.992310       4.763868       0.263895       0.134000       0.134500       0.074400       0.315000
57926     57926     guizhou        107.8803       25.4103          138       152     2012      12        20        355              0.000000       7.223846       4.904046       0.271237   -9999.000000   -9999.000000       0.073700       0.449000
57926     57926     guizhou        107.8803       25.4103          138       152     2012      12        21        356              0.209000       6.686157       0.969942       0.285480   -9999.000000       0.245400   -9999.000000   -9999.000000
57926     57926     guizhou        107.8803       25.4103          138       152     2012      12        22        357              0.204583       6.019379       0.000000       0.276476       0.130500       0.086200   -9999.000000       0.188000
57926     57926     guizhou        107.8803       25.4103          138       152     2012      12        23        358              0.197250       5.723663       0.000000       0.270949       0.117000   -9999.000000   -9999.000000   -9999.000000
57926     57926     guizhou        107.8803       25.4103          138       152     2012      12        24        359              0.192556       5.974396       1.054108       0.266578       0.115500       0.507500       0.074300       0.225000
57926     57926     guizhou        107.8803       25.4103          138       152     2012      12        25        360              0.193875       8.297394       6.412396       0.264388   -9999.000000   -9999.000000       0.080700       0.255000
57926     57926     guizhou        107.8803       25.4103          138       152     2012      12        26        361              0.000000       6.816895       2.349929       0.276978   -9999.000000       0.350500       0.080600       0.270000
57926     57926     guizhou        107.8803       25.4103          138       152     2012      12        27        362              0.206000       4.373657       0.168106       0.281053       0.142000       0.058900   -9999.000000       0.300000
57926     57926     guizhou        107.8803       25.4103          138       152     2012      12        28        363              0.000000       4.605591       1.882460       0.275155       0.145500   -9999.000000   -9999.000000   -9999.000000
57926     57926     guizhou        107.8803       25.4103          138       152     2012      12        29        364              0.000000       6.148224       1.853743       0.275449       0.132000       0.422000   -9999.000000       0.095000
57926     57926     guizhou        107.8803       25.4103          138       152     2012      12        30        365              0.000000       3.672760       0.000000       0.277744   -9999.000000   -9999.000000       0.074900       0.171000
57926     57926     guizhou        107.8803       25.4103          138       152     2012      12        31        366              0.197000       3.551483       0.000000       0.270770   -9999.000000       0.416800       0.078200   -9999.000000
