# Supplementary material for: Research on Fusing Multisatellite Soil Moisture Data Based on Bayesian Model Averaging
Source: Hindawi journal article supplement (doi:10.1155/2018/9310838), 2018-06-25
Supplement: f1 [file 9310838.f1.zip › 2012_sm00-10cm_daily_ZDB_ZHY_57932_366days_allin.txt]

57932     57932     guizhou        108.5122       25.9275          136       154     2012      01        01        001              0.000000   -9999.000000       0.408468   -9999.000000       0.123000   -9999.000000   -9999.000000   -9999.000000
57932     57932     guizhou        108.5122       25.9275          136       154     2012      01        02        002              0.205375       6.990997       4.624908       0.287968       0.126000       0.162000   -9999.000000       0.184000
57932     57932     guizhou        108.5122       25.9275          136       154     2012      01        03        003              0.000000       6.912903       8.055566       0.295653   -9999.000000   -9999.000000   -9999.000000   -9999.000000
57932     57932     guizhou        108.5122       25.9275          136       154     2012      01        04        004              0.268818       4.713531       2.339340       0.306815       0.132000   -9999.000000       0.050300       0.134000
57932     57932     guizhou        108.5122       25.9275          136       154     2012      01        05        005              0.292333       3.328400       3.244878       0.296943       0.138500   -9999.000000       0.050700   -9999.000000
57932     57932     guizhou        108.5122       25.9275          136       154     2012      01        06        006              0.298833       2.391754       0.943225       0.296740       0.135000   -9999.000000       0.050400       0.185000
57932     57932     guizhou        108.5122       25.9275          136       154     2012      01        07        007              0.302000       3.911560       0.000000       0.294098       0.134000       0.071600   -9999.000000       0.119000
57932     57932     guizhou        108.5122       25.9275          136       154     2012      01        08        008              0.000000       4.093079       0.000000       0.291210   -9999.000000   -9999.000000   -9999.000000   -9999.000000
57932     57932     guizhou        108.5122       25.9275          136       154     2012      01        09        009              0.305696       4.875610       4.709861       0.289898   -9999.000000       0.223400   -9999.000000       0.291000
57932     57932     guizhou        108.5122       25.9275          136       154     2012      01        10        010              0.306273       6.298676       7.618536       0.288981       0.132500       0.238200       0.040200   -9999.000000
57932     57932     guizhou        108.5122       25.9275          136       154     2012      01        11        011              0.303435       5.950623       0.000000       0.287916       0.101000   -9999.000000       0.039500       0.111000
57932     57932     guizhou        108.5122       25.9275          136       154     2012      01        12        012              0.300500       4.891693       1.538263       0.287623       0.097000       0.142700       0.039500       0.062000
57932     57932     guizhou        108.5122       25.9275          136       154     2012      01        13        013              0.299667       4.827301       4.533573       0.289275   -9999.000000   -9999.000000   -9999.000000   -9999.000000
57932     57932     guizhou        108.5122       25.9275          136       154     2012      01        14        014              0.349208       5.804626      39.975185       0.295224   -9999.000000       0.102500   -9999.000000       0.455000
57932     57932     guizhou        108.5122       25.9275          136       154     2012      01        15        015              0.364478       5.454865       4.199997       0.334831       0.107500   -9999.000000       0.037200   -9999.000000
57932     57932     guizhou        108.5122       25.9275          136       154     2012      01        16        016              0.358261       5.375732       0.295640       0.316033       0.102500   -9999.000000       0.035500       0.150000
57932     57932     guizhou        108.5122       25.9275          136       154     2012      01        17        017              0.000000       5.087524       4.680566       0.302380       0.102000       0.049300       0.035300       0.312000
57932     57932     guizhou        108.5122       25.9275          136       154     2012      01        18        018              0.366304       4.657166       0.810060       0.306176       0.108000   -9999.000000   -9999.000000       0.336000
57932     57932     guizhou        108.5122       25.9275          136       154     2012      01        19        019              0.360952       5.111298       0.830530       0.304484   -9999.000000   -9999.000000   -9999.000000       0.223000
57932     57932     guizhou        108.5122       25.9275          136       154     2012      01        20        020              0.357917       5.179993       0.620246       0.301447       0.114000       0.036600   -9999.000000   -9999.000000
57932     57932     guizhou        108.5122       25.9275          136       154     2012      01        21        021              0.354217       4.688019       0.168964       0.300097       0.127000   -9999.000000       0.035100       0.224000
57932     57932     guizhou        108.5122       25.9275          136       154     2012      01        22        022              0.351083       4.270874       0.000000       0.298256   -9999.000000   -9999.000000       0.032900   -9999.000000
57932     57932     guizhou        108.5122       25.9275          136       154     2012      01        23        023              0.348958       2.777100       0.000000       0.295668       0.113000   -9999.000000       0.033400       0.104000
57932     57932     guizhou        108.5122       25.9275          136       154     2012      01        24        024              0.344870       2.947052       0.160892       0.294172   -9999.000000   -9999.000000   -9999.000000       0.065000
57932     57932     guizhou        108.5122       25.9275          136       154     2012      01        25        025              0.343565       2.889282       0.000000       0.292806   -9999.000000       0.019600   -9999.000000   -9999.000000
57932     57932     guizhou        108.5122       25.9275          136       154     2012      01        26        026              0.341750       3.516113       0.000000       0.293351       0.122000   -9999.000000       0.034100       0.084000
57932     57932     guizhou        108.5122       25.9275          136       154     2012      01        27        027              0.339217       4.105255       0.049273       0.294010       0.117000       0.289300       0.031100   -9999.000000
57932     57932     guizhou        108.5122       25.9275          136       154     2012      01        28        028              0.335750       4.992096       0.000000       0.293706       0.107500   -9999.000000       0.032200       0.196000
57932     57932     guizhou        108.5122       25.9275          136       154     2012      01        29        029              0.330125       5.843658       0.000000       0.292762   -9999.000000   -9999.000000       0.031700       0.217000
57932     57932     guizhou        108.5122       25.9275          136       154     2012      01        30        030              0.323217       5.812012       0.000000       0.291887   -9999.000000       0.088900   -9999.000000       0.013000
57932     57932     guizhou        108.5122       25.9275          136       154     2012      01        31        031              0.316870       5.950195       0.000000       0.291103       0.111000   -9999.000000   -9999.000000       0.282000
57932     57932     guizhou        108.5122       25.9275          136       154     2012      02        01        032              0.309083       8.057556       0.577790       0.289808       0.094000   -9999.000000       0.056900   -9999.000000
57932     57932     guizhou        108.5122       25.9275          136       154     2012      02        02        033              0.302696       8.330292       0.764931       0.290691       0.087500       0.132900       0.054000       0.171000
57932     57932     guizhou        108.5122       25.9275          136       154     2012      02        03        034              0.303435       5.781891       0.923922       0.291156   -9999.000000   -9999.000000       0.055400       0.186000
57932     57932     guizhou        108.5122       25.9275          136       154     2012      02        04        035              0.305000       6.568695       1.042010       0.290408   -9999.000000       0.261000   -9999.000000       0.302000
57932     57932     guizhou        108.5122       25.9275          136       154     2012      02        05        036              0.311875       7.094269       1.154636       0.291383       0.102000   -9999.000000   -9999.000000       0.393000
57932     57932     guizhou        108.5122       25.9275          136       154     2012      02        06        037              0.315889       7.360779       0.000000       0.292335       0.092500   -9999.000000   -9999.000000   -9999.000000
57932     57932     guizhou        108.5122       25.9275          136       154     2012      02        07        038              0.316833       7.997040       0.000000       0.289408       0.096000       0.042200       0.029400       0.354000
57932     57932     guizhou        108.5122       25.9275          136       154     2012      02        08        039              0.311545       8.191589       0.000000       0.286439   -9999.000000   -9999.000000       0.030100   -9999.000000
57932     57932     guizhou        108.5122       25.9275          136       154     2012      02        09        040              0.307000       4.726196       0.959617       0.285465   -9999.000000       0.050800       0.031000       0.066000
57932     57932     guizhou        108.5122       25.9275          136       154     2012      02        10        041              0.307000       3.424286       0.059551       0.287251       0.099000   -9999.000000   -9999.000000       0.108000
57932     57932     guizhou        108.5122       25.9275          136       154     2012      02        11        042              0.310167       4.156433       0.240968       0.285833       0.126000   -9999.000000   -9999.000000   -9999.000000
57932     57932     guizhou        108.5122       25.9275          136       154     2012      02        12        043              0.312304       5.137085       2.812631       0.284845       0.128000       0.109500   -9999.000000       0.361000
57932     57932     guizhou        108.5122       25.9275          136       154     2012      02        13        044              0.313000       6.175720       1.795825       0.288822   -9999.000000   -9999.000000       0.029700   -9999.000000
57932     57932     guizhou        108.5122       25.9275          136       154     2012      02        14        045              0.316455       7.056122       0.427396       0.291236   -9999.000000       0.104000       0.033700       0.371000
57932     57932     guizhou        108.5122       25.9275          136       154     2012      02        15        046              0.317000       6.591003       1.603176       0.288712   -9999.000000   -9999.000000   -9999.000000       0.200000
57932     57932     guizhou        108.5122       25.9275          136       154     2012      02        16        047              0.319609       5.845795       0.000000       0.285557       0.122000   -9999.000000   -9999.000000       0.198000
57932     57932     guizhou        108.5122       25.9275          136       154     2012      02        17        048              0.321714       6.059509       0.000000       0.283923       0.120500       0.005000   -9999.000000       0.224000
57932     57932     guizhou        108.5122       25.9275          136       154     2012      02        18        049              0.000000       5.452637       0.000000       0.283056       0.111000   -9999.000000       0.029500   -9999.000000
57932     57932     guizhou        108.5122       25.9275          136       154     2012      02        19        050              0.326400       4.354126       0.133270       0.282357   -9999.000000       0.053200       0.035300       0.193000
57932     57932     guizhou        108.5122       25.9275          136       154     2012      02        20        051              0.324913       6.911163       2.477597       0.280947   -9999.000000       0.285100       0.028300   -9999.000000
57932     57932     guizhou        108.5122       25.9275          136       154     2012      02        21        052              0.326348       7.278442       1.014091       0.284772       0.082500   -9999.000000   -9999.000000       0.472000
57932     57932     guizhou        108.5122       25.9275          136       154     2012      02        22        053              0.327000       9.024902       4.459290       0.287900       0.079500       0.066000   -9999.000000       0.601000
57932     57932     guizhou        108.5122       25.9275          136       154     2012      02        23        054              0.000000       9.982941       1.230085       0.292970       0.073000   -9999.000000   -9999.000000   -9999.000000
57932     57932     guizhou        108.5122       25.9275          136       154     2012      02        24        055              0.327000      10.309204       0.413816       0.289323   -9999.000000       0.023600       0.028500       0.154000
57932     57932     guizhou        108.5122       25.9275          136       154     2012      02        25        056              0.324652       9.020172       0.107261       0.286610   -9999.000000       0.013400       0.029100   -9999.000000
57932     57932     guizhou        108.5122       25.9275          136       154     2012      02        26        057              0.324000       6.472534       0.396393       0.283912       0.092000   -9999.000000       0.028100       0.135000
57932     57932     guizhou        108.5122       25.9275          136       154     2012      02        27        058              0.000000       4.579132       0.059499       0.282955       0.081500       0.071700   -9999.000000       0.216000
57932     57932     guizhou        108.5122       25.9275          136       154     2012      02        28        059              0.000000       4.830841       0.198523       0.282450       0.080000   -9999.000000   -9999.000000       0.192000
57932     57932     guizhou        108.5122       25.9275          136       154     2012      02        29        060              0.000000   -9999.000000       0.000000   -9999.000000       0.078000   -9999.000000   -9999.000000   -9999.000000
57932     57932     guizhou        108.5122       25.9275          136       154     2012      03        01        061              0.328696       5.338501       0.292509       0.281782   -9999.000000       0.149700       0.026300   -9999.000000
57932     57932     guizhou        108.5122       25.9275          136       154     2012      03        02        062              0.327875       8.559296       0.875587       0.281339   -9999.000000   -9999.000000       0.027800       0.362000
57932     57932     guizhou        108.5122       25.9275          136       154     2012      03        03        063              0.334250       8.352844      12.950774       0.281978       0.122000       0.022000   -9999.000000       0.387000
57932     57932     guizhou        108.5122       25.9275          136       154     2012      03        04        064              0.378652       7.732574       4.361264       0.295092       0.113500   -9999.000000   -9999.000000       0.534000
57932     57932     guizhou        108.5122       25.9275          136       154     2012      03        05        065              0.376471       7.488007       0.166556       0.306106       0.109000   -9999.000000   -9999.000000       0.383000
57932     57932     guizhou        108.5122       25.9275          136       154     2012      03        06        066              0.369042      10.069977       0.313521       0.292526   -9999.000000       0.053300       0.052300   -9999.000000
57932     57932     guizhou        108.5122       25.9275          136       154     2012      03        07        067              0.000000       8.384521       0.293507       0.288225   -9999.000000   -9999.000000       0.060500       0.421000
57932     57932     guizhou        108.5122       25.9275          136       154     2012      03        08        068              0.000000       7.431183       0.503268       0.286503       0.121500       0.067600       0.055000   -9999.000000
57932     57932     guizhou        108.5122       25.9275          136       154     2012      03        09        069              0.000000       7.087677       0.249132       0.286818       0.115500       0.055400   -9999.000000       0.282000
57932     57932     guizhou        108.5122       25.9275          136       154     2012      03        10        070              0.364842       7.037689       0.000000       0.284941       0.099500   -9999.000000   -9999.000000       0.406000
57932     57932     guizhou        108.5122       25.9275          136       154     2012      03        11        071              0.360667      10.826874       0.000000       0.281980   -9999.000000       0.267000   -9999.000000   -9999.000000
57932     57932     guizhou        108.5122       25.9275          136       154     2012      03        12        072              0.352909      12.030487       0.000000       0.280348   -9999.000000   -9999.000000       0.029800       0.435000
57932     57932     guizhou        108.5122       25.9275          136       154     2012      03        13        073              0.346417      10.030762       0.000000       0.280781       0.105000       0.132500       0.031300   -9999.000000
57932     57932     guizhou        108.5122       25.9275          136       154     2012      03        14        074              0.337087      14.176636       3.729177       0.278240       0.107000       0.148900   -9999.000000       0.483000
57932     57932     guizhou        108.5122       25.9275          136       154     2012      03        15        075              0.333708      12.517334       0.214839       0.286210       0.097000   -9999.000000   -9999.000000       0.554000
57932     57932     guizhou        108.5122       25.9275          136       154     2012      03        16        076              0.323739      15.303314       1.538302       0.285861       0.099000       0.182200   -9999.000000       0.458000
57932     57932     guizhou        108.5122       25.9275          136       154     2012      03        17        077              0.312083      14.430878       0.000000       0.281825   -9999.000000   -9999.000000       0.029500       0.502000
57932     57932     guizhou        108.5122       25.9275          136       154     2012      03        18        078              0.297542      18.710114       0.000000       0.278689       0.100000   -9999.000000       0.027600   -9999.000000
57932     57932     guizhou        108.5122       25.9275          136       154     2012      03        19        079              0.271958      20.091003       0.000000       0.275691       0.095500       0.114400       0.061800       0.512000
57932     57932     guizhou        108.5122       25.9275          136       154     2012      03        20        080              0.239667      22.635895       0.000000       0.270538       0.095500   -9999.000000   -9999.000000   -9999.000000
57932     57932     guizhou        108.5122       25.9275          136       154     2012      03        21        081              0.226579      16.388947       0.582321       0.271308       0.082000   -9999.000000   -9999.000000       0.454000
57932     57932     guizhou        108.5122       25.9275          136       154     2012      03        22        082              0.241458      13.449951      13.072699       0.273757   -9999.000000   -9999.000000   -9999.000000       0.646000
57932     57932     guizhou        108.5122       25.9275          136       154     2012      03        23        083              0.296167      14.675781       1.844154       0.296311   -9999.000000   -9999.000000       0.060200   -9999.000000
57932     57932     guizhou        108.5122       25.9275          136       154     2012      03        24        084              0.306250      11.988708       7.695683       0.294868       0.080000       0.082700       0.056800       0.481000
57932     57932     guizhou        108.5122       25.9275          136       154     2012      03        25        085              0.000000      16.099548       0.425540       0.281822       0.076500   -9999.000000       0.060700   -9999.000000
57932     57932     guizhou        108.5122       25.9275          136       154     2012      03        26        086              0.291333      17.138672       1.158897       0.275814       0.076500       0.063800   -9999.000000   -9999.000000
57932     57932     guizhou        108.5122       25.9275          136       154     2012      03        27        087              0.278957      17.901337       9.581868       0.272186   -9999.000000   -9999.000000   -9999.000000       0.433000
57932     57932     guizhou        108.5122       25.9275          136       154     2012      03        28        088              0.366208      18.193817      21.954960       0.281511   -9999.000000   -9999.000000   -9999.000000       0.755000
57932     57932     guizhou        108.5122       25.9275          136       154     2012      03        29        089              0.385565      15.994415       9.757477       0.323254       0.091000       0.294800       0.069800       0.729000
57932     57932     guizhou        108.5122       25.9275          136       154     2012      03        30        090              0.398292      16.884094       5.603329       0.313880       0.083000   -9999.000000       0.068900   -9999.000000
57932     57932     guizhou        108.5122       25.9275          136       154     2012      03        31        091              0.387000      16.366058       6.302575       0.307545       0.071500       0.136000       0.066700       0.581000
57932     57932     guizhou        108.5122       25.9275          136       154     2012      04        01        092              0.375917      17.342285       1.868002       0.290876   -9999.000000       0.266400   -9999.000000   -9999.000000
57932     57932     guizhou        108.5122       25.9275          136       154     2012      04        02        093              0.365333      19.263275       2.425692       0.285571   -9999.000000   -9999.000000   -9999.000000       0.478000
57932     57932     guizhou        108.5122       25.9275          136       154     2012      04        03        094              0.350458      20.096649       0.457895       0.285283       0.110000       0.129200       0.057900       0.586000
57932     57932     guizhou        108.5122       25.9275          136       154     2012      04        04        095              0.328609      21.321747      10.897806       0.284113       0.104500   -9999.000000       0.059300   -9999.000000
57932     57932     guizhou        108.5122       25.9275          136       154     2012      04        05        096              0.312917      21.103638       4.177201       0.302637       0.103000   -9999.000000       0.060500       0.581000
57932     57932     guizhou        108.5122       25.9275          136       154     2012      04        06        097              0.343125      19.797455       1.793715       0.293862       0.097000       0.084000   -9999.000000   -9999.000000
57932     57932     guizhou        108.5122       25.9275          136       154     2012      04        07        098              0.342000      18.800995       0.721891       0.295198   -9999.000000   -9999.000000   -9999.000000       0.339000
57932     57932     guizhou        108.5122       25.9275          136       154     2012      04        08        099              0.342000      16.777405       1.085727       0.291481       0.107000       0.094800   -9999.000000       0.395000
57932     57932     guizhou        108.5122       25.9275          136       154     2012      04        09        100              0.339500      18.291626       0.157747       0.288061       0.100500       0.020100       0.045400   -9999.000000
57932     57932     guizhou        108.5122       25.9275          136       154     2012      04        10        101              0.310583      19.302307       3.906066       0.287663       0.096500   -9999.000000       0.046800       0.697000
57932     57932     guizhou        108.5122       25.9275          136       154     2012      04        11        102              0.265875      22.238037       0.500678       0.290111       0.108000       0.083900       0.043100   -9999.000000
57932     57932     guizhou        108.5122       25.9275          136       154     2012      04        12        103              0.259042      23.286102      22.965343       0.284675   -9999.000000   -9999.000000   -9999.000000       0.663000
57932     57932     guizhou        108.5122       25.9275          136       154     2012      04        13        104              0.287750      23.310577       0.310387       0.330006   -9999.000000       0.146600   -9999.000000       0.505000
57932     57932     guizhou        108.5122       25.9275          136       154     2012      04        14        105              0.284042      19.080170       0.062747       0.299016       0.137000   -9999.000000   -9999.000000       0.486000
57932     57932     guizhou        108.5122       25.9275          136       154     2012      04        15        106              0.274167      18.008057       0.217263       0.291429       0.128500   -9999.000000       0.046700       0.438000
57932     57932     guizhou        108.5122       25.9275          136       154     2012      04        16        107              0.246792      17.899872       1.594334       0.288848       0.108500       0.128500       0.085900   -9999.000000
57932     57932     guizhou        108.5122       25.9275          136       154     2012      04        17        108              0.237292      20.706360      13.026636       0.284948   -9999.000000   -9999.000000       0.081000       0.314000
57932     57932     guizhou        108.5122       25.9275          136       154     2012      04        18        109              0.267792      18.655579       0.994221       0.300107   -9999.000000   -9999.000000   -9999.000000   -9999.000000
57932     57932     guizhou        108.5122       25.9275          136       154     2012      04        19        110              0.295792      19.256256      26.117735       0.297341       0.129500       0.057300   -9999.000000       0.589000
57932     57932     guizhou        108.5122       25.9275          136       154     2012      04        20        111              0.396458      22.605896       0.000000       0.307583       0.118500   -9999.000000       0.077000       0.641000
57932     57932     guizhou        108.5122       25.9275          136       154     2012      04        21        112              0.382083      20.221832       0.000000       0.309322       0.107000       0.198100       0.080100   -9999.000000
57932     57932     guizhou        108.5122       25.9275          136       154     2012      04        22        113              0.355958      22.008179       0.000000       0.292689   -9999.000000   -9999.000000   -9999.000000       0.513000
57932     57932     guizhou        108.5122       25.9275          136       154     2012      04        23        114              0.304208      23.322876       0.000000       0.286879   -9999.000000   -9999.000000   -9999.000000   -9999.000000
57932     57932     guizhou        108.5122       25.9275          136       154     2012      04        24        115              0.253208      23.147980      31.466188       0.286963   -9999.000000       0.260100   -9999.000000       0.590000
57932     57932     guizhou        108.5122       25.9275          136       154     2012      04        25        116              0.000000      26.011871       0.000000       0.306388       0.145500   -9999.000000   -9999.000000       0.834000
57932     57932     guizhou        108.5122       25.9275          136       154     2012      04        26        117              0.237625      18.807739       0.499902       0.308694       0.123500       0.167100       0.106600       0.392000
57932     57932     guizhou        108.5122       25.9275          136       154     2012      04        27        118              0.217292      21.037506       0.000000       0.294866       0.122000       0.245600       0.098900       0.508000
57932     57932     guizhou        108.5122       25.9275          136       154     2012      04        28        119              0.244708      22.151520      38.843777       0.292279   -9999.000000   -9999.000000       0.102700   -9999.000000
57932     57932     guizhou        108.5122       25.9275          136       154     2012      04        29        120              0.360458      23.082855       4.959033       0.317389   -9999.000000       0.205300   -9999.000000       0.655000
57932     57932     guizhou        108.5122       25.9275          136       154     2012      04        30        121              0.342208      24.165680       2.148796       0.316859       0.131500   -9999.000000   -9999.000000   -9999.000000
57932     57932     guizhou        108.5122       25.9275          136       154     2012      05        01        122              0.308500      26.289124      15.613426       0.308878       0.158000       0.125100       0.096200       0.559000
57932     57932     guizhou        108.5122       25.9275          136       154     2012      05        02        123              0.303000      23.838379       4.726345       0.315060       0.174000       0.376200       0.093000       0.686000
57932     57932     guizhou        108.5122       25.9275          136       154     2012      05        03        124              0.298792      22.448456      10.487245       0.315790   -9999.000000   -9999.000000       0.081300   -9999.000000
57932     57932     guizhou        108.5122       25.9275          136       154     2012      05        04        125              0.378417      22.169617       1.858901       0.314369   -9999.000000       0.211700       0.088300       0.666000
57932     57932     guizhou        108.5122       25.9275          136       154     2012      05        05        126              0.408217      22.329071       2.356830       0.315553       0.181500   -9999.000000   -9999.000000   -9999.000000
57932     57932     guizhou        108.5122       25.9275          136       154     2012      05        06        127              0.401750      22.952087       0.200318       0.310493       0.160500       0.185800   -9999.000000       0.591000
57932     57932     guizhou        108.5122       25.9275          136       154     2012      05        07        128              0.398333      24.942871       0.000000       0.304009   -9999.000000       0.177000       0.072500       0.628000
57932     57932     guizhou        108.5122       25.9275          136       154     2012      05        08        129              0.385667      25.979370       0.791026       0.297455   -9999.000000   -9999.000000       0.065400   -9999.000000
57932     57932     guizhou        108.5122       25.9275          136       154     2012      05        09        130              0.395875      26.254608      30.133263       0.293959   -9999.000000       0.252200       0.069200       0.914000
57932     57932     guizhou        108.5122       25.9275          136       154     2012      05        10        131              0.423125      25.714417       1.845234       0.323167       0.188500   -9999.000000   -9999.000000   -9999.000000
57932     57932     guizhou        108.5122       25.9275          136       154     2012      05        11        132              0.415000      25.085083       4.422127       0.313755       0.192500   -9999.000000   -9999.000000       0.665000
57932     57932     guizhou        108.5122       25.9275          136       154     2012      05        12        133              0.427458      25.421417      19.552515       0.310651       0.223000       0.124500   -9999.000000       0.858000
57932     57932     guizhou        108.5122       25.9275          136       154     2012      05        13        134              0.420583      23.994720      22.297432       0.327471       0.221000   -9999.000000       0.058200       0.947000
57932     57932     guizhou        108.5122       25.9275          136       154     2012      05        14        135              0.430917      22.770111       3.868818       0.320297   -9999.000000       0.256600       0.131200       0.824000
57932     57932     guizhou        108.5122       25.9275          136       154     2012      05        15        136              0.417375      21.873688       0.602254       0.325379       0.215000       0.056000       0.123600   -9999.000000
57932     57932     guizhou        108.5122       25.9275          136       154     2012      05        16        137              0.411167      21.602478       0.000000       0.313740       0.191000   -9999.000000   -9999.000000       0.553000
57932     57932     guizhou        108.5122       25.9275          136       154     2012      05        17        138              0.398333      23.554291       0.000000       0.306714       0.192000       0.324700   -9999.000000   -9999.000000
57932     57932     guizhou        108.5122       25.9275          136       154     2012      05        18        139              0.375000      23.821350      15.984013       0.301440       0.174000   -9999.000000       0.096100       0.620000
57932     57932     guizhou        108.5122       25.9275          136       154     2012      05        19        140              0.421750      26.256012       4.159181       0.306401   -9999.000000       0.172000       0.122700       0.812000
57932     57932     guizhou        108.5122       25.9275          136       154     2012      05        20        141              0.407167      26.828339       0.000000       0.311032   -9999.000000       0.281500       0.128300   -9999.000000
57932     57932     guizhou        108.5122       25.9275          136       154     2012      05        21        142              0.400125      26.754639      10.773496       0.297467       0.191000   -9999.000000   -9999.000000       0.723000
57932     57932     guizhou        108.5122       25.9275          136       154     2012      05        22        143              0.424583      24.521729      33.082321       0.308066       0.198000       0.227300   -9999.000000   -9999.000000
57932     57932     guizhou        108.5122       25.9275          136       154     2012      05        23        144              0.439667      23.276794       7.600526       0.334382   -9999.000000   -9999.000000   -9999.000000       1.000000
57932     57932     guizhou        108.5122       25.9275          136       154     2012      05        24        145              0.449708      22.395874      23.733187       0.325013   -9999.000000       0.158700       0.071300       0.856000
57932     57932     guizhou        108.5122       25.9275          136       154     2012      05        25        146              0.000000      21.458099      13.792139       0.334793   -9999.000000       0.229200       0.069600       0.843000
57932     57932     guizhou        108.5122       25.9275          136       154     2012      05        26        147              0.448833      20.851471       0.228658       0.334609       0.189000   -9999.000000       0.066700       0.701000
57932     57932     guizhou        108.5122       25.9275          136       154     2012      05        27        148              0.434792      22.093903       2.833591       0.321238       0.169500       0.122400   -9999.000000   -9999.000000
57932     57932     guizhou        108.5122       25.9275          136       154     2012      05        28        149              0.427083      24.572205       0.194473       0.313968       0.145500   -9999.000000   -9999.000000       0.753000
57932     57932     guizhou        108.5122       25.9275          136       154     2012      05        29        150              0.437208      25.334290      22.131380       0.308992   -9999.000000       0.166300   -9999.000000       0.732000
57932     57932     guizhou        108.5122       25.9275          136       154     2012      05        30        151              0.442167      25.394104       0.053687       0.327892   -9999.000000       0.195600       0.066900   -9999.000000
57932     57932     guizhou        108.5122       25.9275          136       154     2012      05        31        152              0.434250      24.179199       0.265296       0.309519       0.183000   -9999.000000       0.065400   -9999.000000
57932     57932     guizhou        108.5122       25.9275          136       154     2012      06        01        153              0.431500      23.030548       0.623060       0.305793       0.291000       0.383000       0.070100   -9999.000000
57932     57932     guizhou        108.5122       25.9275          136       154     2012      06        02        154              0.428167      22.123352       0.836883       0.302879       0.269000       0.352400   -9999.000000       0.601000
57932     57932     guizhou        108.5122       25.9275          136       154     2012      06        03        155              0.425000      22.564270       4.775453       0.298437       0.264000   -9999.000000   -9999.000000   -9999.000000
57932     57932     guizhou        108.5122       25.9275          136       154     2012      06        04        156              0.433458      23.086151       4.278222       0.300606   -9999.000000       0.478400       0.048300       0.758000
57932     57932     guizhou        108.5122       25.9275          136       154     2012      06        05        157              0.435250      22.649384       6.359938       0.305619       0.300000   -9999.000000       0.045900       0.796000
57932     57932     guizhou        108.5122       25.9275          136       154     2012      06        06        158              0.448167      23.483826       6.747511       0.305655       0.284000       0.194500       0.048400   -9999.000000
57932     57932     guizhou        108.5122       25.9275          136       154     2012      06        07        159              0.463500      25.412811      22.252094       0.308823       0.259000   -9999.000000   -9999.000000       0.952000
57932     57932     guizhou        108.5122       25.9275          136       154     2012      06        08        160              0.465417      25.598175       4.160112       0.325304       0.245000   -9999.000000   -9999.000000   -9999.000000
57932     57932     guizhou        108.5122       25.9275          136       154     2012      06        09        161              0.448625      26.523743       1.203339       0.314686   -9999.000000       0.392400   -9999.000000       0.721000
57932     57932     guizhou        108.5122       25.9275          136       154     2012      06        10        162              0.455042      28.328613      18.766302       0.305127   -9999.000000   -9999.000000       0.045200       0.721000
57932     57932     guizhou        108.5122       25.9275          136       154     2012      06        11        163              0.000000      27.583405       0.544433       0.320701       0.166500       0.388400       0.052700       0.758000
57932     57932     guizhou        108.5122       25.9275          136       154     2012      06        12        164              0.453875      26.025238       0.000000       0.311290       0.149000       0.405200       0.050400       0.689000
57932     57932     guizhou        108.5122       25.9275          136       154     2012      06        13        165              0.448458      26.154541       0.118020       0.304072       0.128000   -9999.000000   -9999.000000   -9999.000000
57932     57932     guizhou        108.5122       25.9275          136       154     2012      06        14        166              0.442333      27.275940       0.246431       0.298486   -9999.000000       0.264800   -9999.000000       0.601000
57932     57932     guizhou        108.5122       25.9275          136       154     2012      06        15        167              0.429458      25.906342       0.000000       0.295532   -9999.000000   -9999.000000   -9999.000000   -9999.000000
57932     57932     guizhou        108.5122       25.9275          136       154     2012      06        16        168              0.407708      26.725616       0.000000       0.290798       0.146500       0.254400       0.049200       0.628000
57932     57932     guizhou        108.5122       25.9275          136       154     2012      06        17        169              0.380917      26.646179       0.000000       0.288295       0.145000       0.350900       0.052300       0.668000
57932     57932     guizhou        108.5122       25.9275          136       154     2012      06        18        170              0.345917      26.844391       0.142290       0.286924       0.123500   -9999.000000       0.077200   -9999.000000
57932     57932     guizhou        108.5122       25.9275          136       154     2012      06        19        171              0.324190      27.423492       0.182844       0.285082   -9999.000000       0.347200   -9999.000000       0.502000
57932     57932     guizhou        108.5122       25.9275          136       154     2012      06        20        172              0.294417      24.988556       0.000000       0.285373   -9999.000000       0.216700   -9999.000000   -9999.000000
57932     57932     guizhou        108.5122       25.9275          136       154     2012      06        21        173              0.273792      27.098389       0.482850       0.281205   -9999.000000   -9999.000000       0.083400       0.639000
57932     57932     guizhou        108.5122       25.9275          136       154     2012      06        22        174              0.271833      26.748291       0.981930       0.281307       0.215000       0.186200       0.080400       0.693000
57932     57932     guizhou        108.5122       25.9275          136       154     2012      06        23        175              0.276833      25.438629       0.312191       0.284325       0.200000   -9999.000000       0.083200       0.564000
57932     57932     guizhou        108.5122       25.9275          136       154     2012      06        24        176              0.269348      25.870392       5.653874       0.282116       0.189000       0.251600   -9999.000000       0.702000
57932     57932     guizhou        108.5122       25.9275          136       154     2012      06        25        177              0.340792      27.292389      67.706161       0.285054   -9999.000000       0.258600   -9999.000000   -9999.000000
57932     57932     guizhou        108.5122       25.9275          136       154     2012      06        26        178              0.448667      26.946259      54.200272       0.335204       0.210000   -9999.000000   -9999.000000       1.000000
57932     57932     guizhou        108.5122       25.9275          136       154     2012      06        27        179              0.449958      25.911163      14.148578       0.374443       0.200500       0.093700       0.093400   -9999.000000
57932     57932     guizhou        108.5122       25.9275          136       154     2012      06        28        180              0.452042      26.270325      13.437853       0.483010       0.204000   -9999.000000       0.094600       0.954000
57932     57932     guizhou        108.5122       25.9275          136       154     2012      06        29        181              0.444667      26.238159       0.000000       0.361866       0.177000       0.301100       0.089000       0.965000
57932     57932     guizhou        108.5122       25.9275          136       154     2012      06        30        182              0.433750      27.945709       3.006617       0.326781   -9999.000000       0.170500   -9999.000000   -9999.000000
57932     57932     guizhou        108.5122       25.9275          136       154     2012      07        01        183              0.415625      29.349426       1.199424       0.314391   -9999.000000   -9999.000000   -9999.000000       0.771000
57932     57932     guizhou        108.5122       25.9275          136       154     2012      07        02        184              0.392542      27.944855       0.000000       0.308068       0.201500       0.301400   -9999.000000   -9999.000000
57932     57932     guizhou        108.5122       25.9275          136       154     2012      07        03        185              0.355625      27.555145       1.242498       0.300296       0.193000   -9999.000000       0.072800       0.621000
57932     57932     guizhou        108.5122       25.9275          136       154     2012      07        04        186              0.310958      27.408386       3.522955       0.294728       0.179500       0.088800       0.072300       0.693000
57932     57932     guizhou        108.5122       25.9275          136       154     2012      07        05        187              0.274583      27.726135       0.000000       0.290274   -9999.000000       0.229100       0.070000   -9999.000000
57932     57932     guizhou        108.5122       25.9275          136       154     2012      07        06        188              0.236125      28.045929       0.000000       0.286961   -9999.000000   -9999.000000   -9999.000000       0.772000
57932     57932     guizhou        108.5122       25.9275          136       154     2012      07        07        189              0.217083      28.977112       1.031521       0.283545   -9999.000000       0.275600   -9999.000000   -9999.000000
57932     57932     guizhou        108.5122       25.9275          136       154     2012      07        08        190              0.203667      28.731567       0.000000       0.282935       0.193000   -9999.000000       0.067300       0.590000
57932     57932     guizhou        108.5122       25.9275          136       154     2012      07        09        191              0.192500      27.736328       0.000000       0.281398       0.178000   -9999.000000       0.061900       0.611000
57932     57932     guizhou        108.5122       25.9275          136       154     2012      07        10        192              0.184500      27.772552       0.000000       0.278231       0.186000       0.244600       0.061500       0.629000
57932     57932     guizhou        108.5122       25.9275          136       154     2012      07        11        193              0.178083      28.537933       0.272843       0.275047   -9999.000000   -9999.000000   -9999.000000       0.784000
57932     57932     guizhou        108.5122       25.9275          136       154     2012      07        12        194              0.173792      29.251953       0.449040       0.271866       0.227000       0.175600   -9999.000000   -9999.000000
57932     57932     guizhou        108.5122       25.9275          136       154     2012      07        13        195              0.192208      28.417053       8.258399       0.270455       0.198000       0.215300   -9999.000000       0.829000
57932     57932     guizhou        108.5122       25.9275          136       154     2012      07        14        196              0.195083      27.199738       4.290168       0.288658       0.205000   -9999.000000       0.062800   -9999.000000
57932     57932     guizhou        108.5122       25.9275          136       154     2012      07        15        197              0.193739      28.802979      29.054333       0.289708       0.210000       0.112700       0.027700       0.920000
57932     57932     guizhou        108.5122       25.9275          136       154     2012      07        16        198              0.408000      28.620239      73.764595       0.307979   -9999.000000   -9999.000000       0.062200       1.000000
57932     57932     guizhou        108.5122       25.9275          136       154     2012      07        17        199              0.446875      26.441620      27.293638       0.372476   -9999.000000       0.118600   -9999.000000   -9999.000000
57932     57932     guizhou        108.5122       25.9275          136       154     2012      07        18        200              0.452708      26.954285      23.573069       0.366103       0.241000       0.216300   -9999.000000       0.632000
57932     57932     guizhou        108.5122       25.9275          136       154     2012      07        19        201              0.441542      27.102966       0.178990       0.402673       0.213000   -9999.000000       0.063700   -9999.000000
57932     57932     guizhou        108.5122       25.9275          136       154     2012      07        20        202              0.430000      28.108063       0.000000       0.327006       0.182000       0.178500       0.060300       0.728000
57932     57932     guizhou        108.5122       25.9275          136       154     2012      07        21        203              0.409583      28.774902       0.000000       0.311702   -9999.000000   -9999.000000       0.062300       0.811000
57932     57932     guizhou        108.5122       25.9275          136       154     2012      07        22        204              0.363750      29.040802       0.421295       0.303909   -9999.000000       0.127300   -9999.000000       0.589000
57932     57932     guizhou        108.5122       25.9275          136       154     2012      07        23        205              0.375043      29.778107       7.751201       0.297211   -9999.000000       0.309300   -9999.000000       0.837000
57932     57932     guizhou        108.5122       25.9275          136       154     2012      07        24        206              0.386000      28.362732       3.693511       0.305656       0.352500   -9999.000000   -9999.000000   -9999.000000
57932     57932     guizhou        108.5122       25.9275          136       154     2012      07        25        207              0.424417      27.419617      17.978191       0.301458       0.352000       0.263600       0.106500       1.000000
57932     57932     guizhou        108.5122       25.9275          136       154     2012      07        26        208              0.448167      27.477325       6.160803       0.318967       0.309000       0.250300       0.113700   -9999.000000
57932     57932     guizhou        108.5122       25.9275          136       154     2012      07        27        209              0.467042      28.103882      14.396287       0.307626   -9999.000000   -9999.000000       0.096300       0.829000
57932     57932     guizhou        108.5122       25.9275          136       154     2012      07        28        210              0.462333      27.576080       9.386137       0.319055   -9999.000000       0.476600   -9999.000000       0.802000
57932     57932     guizhou        108.5122       25.9275          136       154     2012      07        29        211              0.449708      26.889618       2.137801       0.314636       0.334000   -9999.000000   -9999.000000   -9999.000000
57932     57932     guizhou        108.5122       25.9275          136       154     2012      07        30        212              0.436542      28.388458       0.240106       0.304934       0.322500       0.356500   -9999.000000       0.859000
57932     57932     guizhou        108.5122       25.9275          136       154     2012      07        31        213              0.408000      28.858398       0.385305       0.297102       0.271000       0.359400       0.134500   -9999.000000
57932     57932     guizhou        108.5122       25.9275          136       154     2012      08        01        214              0.341500      29.779755       2.590357       0.292458   -9999.000000   -9999.000000       0.141100       0.698000
57932     57932     guizhou        108.5122       25.9275          136       154     2012      08        02        215              0.311542      29.318756       0.000000       0.293436   -9999.000000       0.194600       0.132800       0.710000
57932     57932     guizhou        108.5122       25.9275          136       154     2012      08        03        216              0.272958      28.854065       0.000000       0.288512       0.417500   -9999.000000   -9999.000000   -9999.000000
57932     57932     guizhou        108.5122       25.9275          136       154     2012      08        04        217              0.234042      28.049042       0.603753       0.284538       0.416000       0.074100   -9999.000000       0.687000
57932     57932     guizhou        108.5122       25.9275          136       154     2012      08        05        218              0.248542      28.281647      15.714152       0.282942       0.444500       0.125000       0.150300   -9999.000000
57932     57932     guizhou        108.5122       25.9275          136       154     2012      08        06        219              0.314292      27.018097      10.468980       0.310735       0.461000   -9999.000000       0.164000       0.767000
57932     57932     guizhou        108.5122       25.9275          136       154     2012      08        07        220              0.330208      26.129242       7.593976       0.313231   -9999.000000       0.203400       0.163600       0.782000
57932     57932     guizhou        108.5122       25.9275          136       154     2012      08        08        221              0.329875      26.791229       0.000000       0.307662       0.419000   -9999.000000   -9999.000000       0.703000
57932     57932     guizhou        108.5122       25.9275          136       154     2012      08        09        222              0.316417      27.879211       5.088236       0.292408       0.417000       0.117400   -9999.000000       0.765000
57932     57932     guizhou        108.5122       25.9275          136       154     2012      08        10        223              0.281292      28.352478       0.000000       0.286779       0.407500       0.301700   -9999.000000   -9999.000000
57932     57932     guizhou        108.5122       25.9275          136       154     2012      08        11        224              0.254542      28.639282       0.000000       0.283500       0.257000   -9999.000000       0.156500       0.606000
57932     57932     guizhou        108.5122       25.9275          136       154     2012      08        12        225              0.233542      29.231171       0.184502       0.280961   -9999.000000       0.154900       0.161700   -9999.000000
57932     57932     guizhou        108.5122       25.9275          136       154     2012      08        13        226              0.216917      29.447296       9.275311       0.279330   -9999.000000   -9999.000000       0.121400       0.737000
57932     57932     guizhou        108.5122       25.9275          136       154     2012      08        14        227              0.206750      29.451019      27.766512       0.286659       0.285000   -9999.000000   -9999.000000       1.000000
57932     57932     guizhou        108.5122       25.9275          136       154     2012      08        15        228              0.199750      28.330475       0.193497       0.322643       0.273500       0.178000   -9999.000000   -9999.000000
57932     57932     guizhou        108.5122       25.9275          136       154     2012      08        16        229              0.187208      29.662048       5.871756       0.294308       0.233500   -9999.000000   -9999.000000       0.490000
57932     57932     guizhou        108.5122       25.9275          136       154     2012      08        17        230              0.200875      29.999176      10.499088       0.287057   -9999.000000   -9999.000000       0.125600   -9999.000000
57932     57932     guizhou        108.5122       25.9275          136       154     2012      08        18        231              0.216625      28.534332       3.376107       0.302405   -9999.000000       0.215600       0.130200       0.835000
57932     57932     guizhou        108.5122       25.9275          136       154     2012      08        19        232              0.201750      28.335541       0.581805       0.298019       0.289000   -9999.000000       0.121600       0.847000
57932     57932     guizhou        108.5122       25.9275          136       154     2012      08        20        233              0.190208      28.918549       1.419392       0.289618       0.278500       0.150400   -9999.000000       0.547000
57932     57932     guizhou        108.5122       25.9275          136       154     2012      08        21        234              0.183042      28.929382       2.425079       0.285099       0.359500   -9999.000000   -9999.000000       0.891000
57932     57932     guizhou        108.5122       25.9275          136       154     2012      08        22        235              0.178000      27.844452       0.463068       0.288402       0.387000       0.161600       0.081400   -9999.000000
57932     57932     guizhou        108.5122       25.9275          136       154     2012      08        23        236              0.178083      25.074799       0.000000       0.285452   -9999.000000       0.214500       0.076600       0.605000
57932     57932     guizhou        108.5122       25.9275          136       154     2012      08        24        237              0.176417      24.629578       0.000000       0.282892   -9999.000000   -9999.000000       0.079500   -9999.000000
57932     57932     guizhou        108.5122       25.9275          136       154     2012      08        25        238              0.000000      25.304047       0.000000       0.280195       0.356500   -9999.000000   -9999.000000       0.613000
57932     57932     guizhou        108.5122       25.9275          136       154     2012      08        26        239              0.170208      26.141602       0.000000       0.277914       0.339000   -9999.000000   -9999.000000       0.706000
57932     57932     guizhou        108.5122       25.9275          136       154     2012      08        27        240              0.166333      26.681702       0.000000       0.275319       0.297000       0.149600   -9999.000000   -9999.000000
57932     57932     guizhou        108.5122       25.9275          136       154     2012      08        28        241              0.163167      26.597015       0.000000       0.273611   -9999.000000       0.145900       0.054400       0.717000
57932     57932     guizhou        108.5122       25.9275          136       154     2012      08        29        242              0.159375      27.726471       0.000000       0.270337   -9999.000000   -9999.000000       0.056500   -9999.000000
57932     57932     guizhou        108.5122       25.9275          136       154     2012      08        30        243              0.156667      27.867004       0.998575       0.270028       0.348000       0.355400       0.053700       0.602000
57932     57932     guizhou        108.5122       25.9275          136       154     2012      08        31        244              0.170917      28.846832       2.460066       0.270090       0.360000       0.362800   -9999.000000       0.733000
57932     57932     guizhou        108.5122       25.9275          136       154     2012      09        01        245              0.178667      27.641693       0.864127       0.276215       0.282500   -9999.000000   -9999.000000   -9999.000000
57932     57932     guizhou        108.5122       25.9275          136       154     2012      09        02        246              0.176500      27.720398       4.879939       0.273160   -9999.000000       0.277700   -9999.000000       0.764000
57932     57932     guizhou        108.5122       25.9275          136       154     2012      09        03        247              0.172708      27.340912       0.091777       0.282262   -9999.000000   -9999.000000       0.058800   -9999.000000
57932     57932     guizhou        108.5122       25.9275          136       154     2012      09        04        248              0.166958      24.410553       0.000000       0.275383   -9999.000000       0.171200       0.060900       0.569000
57932     57932     guizhou        108.5122       25.9275          136       154     2012      09        05        249              0.158792      25.871155       0.000000       0.269226       0.300000       0.257500       0.059300       0.610000
57932     57932     guizhou        108.5122       25.9275          136       154     2012      09        06        250              0.153833      26.478973       0.000000       0.266604       0.287500   -9999.000000   -9999.000000       0.616000
57932     57932     guizhou        108.5122       25.9275          136       154     2012      09        07        251              0.150500      26.806580       0.170343       0.264895       0.288000       0.236600   -9999.000000       0.633000
57932     57932     guizhou        108.5122       25.9275          136       154     2012      09        08        252              0.146833      27.786835       0.000000       0.262982   -9999.000000   -9999.000000       0.059100   -9999.000000
57932     57932     guizhou        108.5122       25.9275          136       154     2012      09        09        253              0.142750      27.822357       1.346166       0.260343   -9999.000000       0.205800       0.057900       0.529000
57932     57932     guizhou        108.5122       25.9275          136       154     2012      09        10        254              0.139708      27.976746       1.458109       0.258321       0.290000       0.208600       0.057000   -9999.000000
57932     57932     guizhou        108.5122       25.9275          136       154     2012      09        11        255              0.135375      27.839264       0.000000       0.255283       0.183000   -9999.000000   -9999.000000       0.550000
57932     57932     guizhou        108.5122       25.9275          136       154     2012      09        12        256              0.136292      27.105408      10.130749       0.253978       0.195000       0.098700   -9999.000000       0.644000
57932     57932     guizhou        108.5122       25.9275          136       154     2012      09        13        257              0.146292      25.485931       4.471693       0.281495   -9999.000000   -9999.000000   -9999.000000   -9999.000000
57932     57932     guizhou        108.5122       25.9275          136       154     2012      09        14        258              0.152583      21.564972       0.000000       0.287620   -9999.000000       0.126100       0.059900       0.321000
57932     57932     guizhou        108.5122       25.9275          136       154     2012      09        15        259              0.148958      22.635406       0.000000       0.272604       0.214000       0.149600       0.061200   -9999.000000
57932     57932     guizhou        108.5122       25.9275          136       154     2012      09        16        260              0.142083      22.862854       1.283378       0.266575       0.216000   -9999.000000       0.061500       0.512000
57932     57932     guizhou        108.5122       25.9275          136       154     2012      09        17        261              0.140542      21.416168       0.256308       0.267562       0.215500       0.363200   -9999.000000       0.541000
57932     57932     guizhou        108.5122       25.9275          136       154     2012      09        18        262              0.142125      21.154053       3.101821       0.268409       0.196000   -9999.000000   -9999.000000       0.684000
57932     57932     guizhou        108.5122       25.9275          136       154     2012      09        19        263              0.148583      21.688324       0.288771       0.275033   -9999.000000   -9999.000000       0.042100       0.431000
57932     57932     guizhou        108.5122       25.9275          136       154     2012      09        20        264              0.164250      21.411346       8.548215       0.272655   -9999.000000       0.321900       0.046000   -9999.000000
57932     57932     guizhou        108.5122       25.9275          136       154     2012      09        21        265              0.176458      21.419769       9.693683       0.290177   -9999.000000   -9999.000000       0.044600       1.000000
57932     57932     guizhou        108.5122       25.9275          136       154     2012      09        22        266              0.198000      21.888306       5.435544       0.300082       0.231500       0.355600       0.043600   -9999.000000
57932     57932     guizhou        108.5122       25.9275          136       154     2012      09        23        267              0.327625      22.236786      15.721684       0.301223       0.215000       0.195800   -9999.000000       0.950000
57932     57932     guizhou        108.5122       25.9275          136       154     2012      09        24        268              0.360000      21.893646       0.265278       0.315039   -9999.000000   -9999.000000   -9999.000000       0.716000
57932     57932     guizhou        108.5122       25.9275          136       154     2012      09        25        269              0.360917      22.240814       0.358621       0.293838   -9999.000000       0.158700       0.071900   -9999.000000
57932     57932     guizhou        108.5122       25.9275          136       154     2012      09        26        270              0.358333      23.387329       0.403269       0.285680       0.214000   -9999.000000       0.077000       0.808000
57932     57932     guizhou        108.5122       25.9275          136       154     2012      09        27        271              0.352000      24.281403       0.000000       0.281231       0.204000       0.152000       0.072900   -9999.000000
57932     57932     guizhou        108.5122       25.9275          136       154     2012      09        28        272              0.340533      23.172211       0.000000       0.277370       0.205500   -9999.000000   -9999.000000       0.539000
57932     57932     guizhou        108.5122       25.9275          136       154     2012      09        29        273              0.315917      22.664185       0.000000       0.273364       0.184000   -9999.000000   -9999.000000       0.652000
57932     57932     guizhou        108.5122       25.9275          136       154     2012      09        30        274              0.273208      22.362457       0.027785       0.268391   -9999.000000   -9999.000000   -9999.000000   -9999.000000
57932     57932     guizhou        108.5122       25.9275          136       154     2012      10        01        275              0.231583      22.219421       0.000000       0.265883   -9999.000000   -9999.000000       0.100800       0.553000
57932     57932     guizhou        108.5122       25.9275          136       154     2012      10        02        276              0.204333      22.520172       1.032501       0.263284       0.122500       0.204400       0.105700   -9999.000000
57932     57932     guizhou        108.5122       25.9275          136       154     2012      10        03        277              0.189833      23.410492       1.907396       0.262533       0.142000       0.308400       0.106900       0.541000
57932     57932     guizhou        108.5122       25.9275          136       154     2012      10        04        278              0.194667      22.051270       6.495118       0.270382       0.153000   -9999.000000   -9999.000000       0.738000
57932     57932     guizhou        108.5122       25.9275          136       154     2012      10        05        279              0.213167      20.403168       2.463482       0.288915   -9999.000000       0.436900   -9999.000000       0.695000
57932     57932     guizhou        108.5122       25.9275          136       154     2012      10        06        280              0.227917      19.911896       0.102583       0.286707   -9999.000000   -9999.000000       0.111000       0.737000
57932     57932     guizhou        108.5122       25.9275          136       154     2012      10        07        281              0.239292      19.833252       0.000000       0.280189       0.141500       0.133900       0.110300   -9999.000000
57932     57932     guizhou        108.5122       25.9275          136       154     2012      10        08        282              0.243583      20.979370       0.892600       0.276568       0.137000       0.220500       0.070100       0.474000
57932     57932     guizhou        108.5122       25.9275          136       154     2012      10        09        283              0.237250      22.691589       0.997045       0.274198       0.126500   -9999.000000   -9999.000000   -9999.000000
57932     57932     guizhou        108.5122       25.9275          136       154     2012      10        10        284              0.231292      20.866364       0.000000       0.277876       0.138000       0.250500   -9999.000000       0.501000
57932     57932     guizhou        108.5122       25.9275          136       154     2012      10        11        285              0.220167      21.797913       0.000000       0.271845   -9999.000000       0.120300   -9999.000000       0.597000
57932     57932     guizhou        108.5122       25.9275          136       154     2012      10        12        286              0.208333      22.226166       2.179996       0.269468       0.212000   -9999.000000       0.064100   -9999.000000
57932     57932     guizhou        108.5122       25.9275          136       154     2012      10        13        287              0.196625      22.651123       0.786053       0.267800       0.227000       0.152700       0.068000       0.694000
57932     57932     guizhou        108.5122       25.9275          136       154     2012      10        14        288              0.195167      20.430817       0.332305       0.271620       0.218000   -9999.000000       0.063600   -9999.000000
57932     57932     guizhou        108.5122       25.9275          136       154     2012      10        15        289              0.195583      20.323792       0.678550       0.271348       0.210000       0.077900   -9999.000000       0.621000
57932     57932     guizhou        108.5122       25.9275          136       154     2012      10        16        290              0.199375      20.866302       8.222552       0.272982   -9999.000000   -9999.000000   -9999.000000       0.720000
57932     57932     guizhou        108.5122       25.9275          136       154     2012      10        17        291              0.198542      21.130554       0.000000       0.293138   -9999.000000   -9999.000000   -9999.000000       0.316000
57932     57932     guizhou        108.5122       25.9275          136       154     2012      10        18        292              0.189083      19.767914       0.000000       0.276823       0.196500       0.204200       0.135100       0.547000
57932     57932     guizhou        108.5122       25.9275          136       154     2012      10        19        293              0.181292      20.054871       0.046174       0.271418       0.194000   -9999.000000       0.128500   -9999.000000
57932     57932     guizhou        108.5122       25.9275          136       154     2012      10        20        294              0.179042      19.268707       0.000000       0.272294       0.169000       0.086500       0.123100       0.712000
57932     57932     guizhou        108.5122       25.9275          136       154     2012      10        21        295              0.174417      21.889832       0.000000       0.270574   -9999.000000       0.303800   -9999.000000   -9999.000000
57932     57932     guizhou        108.5122       25.9275          136       154     2012      10        22        296              0.173375      23.095306       4.602885       0.268554   -9999.000000   -9999.000000   -9999.000000       0.428000
57932     57932     guizhou        108.5122       25.9275          136       154     2012      10        23        297              0.171833      21.642120       1.028373       0.281288   -9999.000000       0.325400       0.061800       0.462000
57932     57932     guizhou        108.5122       25.9275          136       154     2012      10        24        298              0.168167      19.718597       0.173381       0.273408   -9999.000000   -9999.000000       0.054300   -9999.000000
57932     57932     guizhou        108.5122       25.9275          136       154     2012      10        25        299              0.000000      18.864838       0.204093       0.272184       0.191000   -9999.000000       0.057400       0.474000
57932     57932     guizhou        108.5122       25.9275          136       154     2012      10        26        300              0.161875      20.824829       0.574183       0.270400       0.181000       0.337200   -9999.000000   -9999.000000
57932     57932     guizhou        108.5122       25.9275          136       154     2012      10        27        301              0.157750      22.489136       1.560166       0.268771   -9999.000000   -9999.000000   -9999.000000       0.461000
57932     57932     guizhou        108.5122       25.9275          136       154     2012      10        28        302              0.000000      22.204498      17.934992       0.268980   -9999.000000       0.343700   -9999.000000       0.537000
57932     57932     guizhou        108.5122       25.9275          136       154     2012      10        29        303              0.240667      21.019318       2.944807       0.305149       0.211500       0.126100       0.149300   -9999.000000
57932     57932     guizhou        108.5122       25.9275          136       154     2012      10        30        304              0.285417      21.270050       0.207742       0.297551       0.198000   -9999.000000       0.147600       0.506000
57932     57932     guizhou        108.5122       25.9275          136       154     2012      10        31        305              0.288708      18.312317       0.000000       0.286814       0.183000       0.279800       0.143900   -9999.000000
57932     57932     guizhou        108.5122       25.9275          136       154     2012      11        01        306              0.287083      18.371216       0.000000       0.278834   -9999.000000   -9999.000000   -9999.000000       0.376000
57932     57932     guizhou        108.5122       25.9275          136       154     2012      11        02        307              0.282208      17.849731       0.000000       0.275101   -9999.000000       0.118800   -9999.000000       0.556000
57932     57932     guizhou        108.5122       25.9275          136       154     2012      11        03        308              0.275333      18.549866       2.702825       0.271666       0.178500       0.277500   -9999.000000       0.429000
57932     57932     guizhou        108.5122       25.9275          136       154     2012      11        04        309              0.264083      18.501495       0.063418       0.271577       0.157500   -9999.000000       0.144300       0.509000
57932     57932     guizhou        108.5122       25.9275          136       154     2012      11        05        310              0.252458      19.136322       9.211139       0.268602       0.166000       0.161100       0.117100   -9999.000000
57932     57932     guizhou        108.5122       25.9275          136       154     2012      11        06        311              0.368292      16.998688      16.602205       0.281319       0.195000   -9999.000000       0.116900       0.593000
57932     57932     guizhou        108.5122       25.9275          136       154     2012      11        07        312              0.419208      15.886871      14.934796       0.314299   -9999.000000       0.200500   -9999.000000   -9999.000000
57932     57932     guizhou        108.5122       25.9275          136       154     2012      11        08        313              0.414958      15.428955       1.001553       0.319074       0.210000       0.160000   -9999.000000       0.651000
57932     57932     guizhou        108.5122       25.9275          136       154     2012      11        09        314              0.407826      15.505585       0.126323       0.300529       0.198000   -9999.000000       0.114900       0.620000
57932     57932     guizhou        108.5122       25.9275          136       154     2012      11        10        315              0.403875      14.869476       0.071466       0.290361       0.172500       0.291500       0.114000   -9999.000000
57932     57932     guizhou        108.5122       25.9275          136       154     2012      11        11        316              0.399333      15.922211       0.000000       0.284384       0.160500   -9999.000000       0.112100       0.315000
57932     57932     guizhou        108.5122       25.9275          136       154     2012      11        12        317              0.393750      15.957001       0.000000       0.279914   -9999.000000       0.175400   -9999.000000   -9999.000000
57932     57932     guizhou        108.5122       25.9275          136       154     2012      11        13        318              0.000000      15.664856       0.000000       0.278215   -9999.000000       0.414200   -9999.000000       0.561000
57932     57932     guizhou        108.5122       25.9275          136       154     2012      11        14        319              0.385375      16.820587       3.083250       0.276412       0.174000   -9999.000000   -9999.000000       0.518000
57932     57932     guizhou        108.5122       25.9275          136       154     2012      11        15        320              0.387208      16.958527      20.760090       0.281258       0.183500       0.230500       0.149700       0.792000
57932     57932     guizhou        108.5122       25.9275          136       154     2012      11        16        321              0.425625      16.932953      28.189007       0.311116       0.165000       0.252700       0.154800       0.645000
57932     57932     guizhou        108.5122       25.9275          136       154     2012      11        17        322              0.000000      14.116058       0.045438       0.331606   -9999.000000   -9999.000000       0.153100   -9999.000000
57932     57932     guizhou        108.5122       25.9275          136       154     2012      11        18        323              0.405000      14.153717       0.000000       0.300288   -9999.000000       0.210800   -9999.000000       0.548000
57932     57932     guizhou        108.5122       25.9275          136       154     2012      11        19        324              0.404125      14.136078       0.102791       0.293444       0.188000   -9999.000000   -9999.000000   -9999.000000
57932     57932     guizhou        108.5122       25.9275          136       154     2012      11        20        325              0.402250      14.350952       0.051197       0.291984       0.180500       0.301300       0.076500       0.479000
57932     57932     guizhou        108.5122       25.9275          136       154     2012      11        21        326              0.400750      14.614746       0.056296       0.291606       0.151500       0.233900       0.075000       0.483000
57932     57932     guizhou        108.5122       25.9275          136       154     2012      11        22        327              0.398000      14.277771       0.123386       0.290710       0.157000   -9999.000000       0.074800   -9999.000000
57932     57932     guizhou        108.5122       25.9275          136       154     2012      11        23        328              0.393125      13.485107       0.000000       0.290125   -9999.000000       0.275800   -9999.000000       0.365000
57932     57932     guizhou        108.5122       25.9275          136       154     2012      11        24        329              0.390000      12.292267       0.636784       0.289318   -9999.000000   -9999.000000   -9999.000000   -9999.000000
57932     57932     guizhou        108.5122       25.9275          136       154     2012      11        25        330              0.388250      12.331421       0.182524       0.289996       0.163000       0.057100   -9999.000000       0.435000
57932     57932     guizhou        108.5122       25.9275          136       154     2012      11        26        331              0.383750      13.639923       0.000000       0.289258       0.144000       0.077400   -9999.000000       0.463000
57932     57932     guizhou        108.5122       25.9275          136       154     2012      11        27        332              0.375542      12.578888       0.106222       0.286949       0.140500   -9999.000000       0.058300   -9999.000000
57932     57932     guizhou        108.5122       25.9275          136       154     2012      11        28        333              0.368375      12.302460       0.000000       0.286580   -9999.000000       0.281900       0.054800       0.366000
57932     57932     guizhou        108.5122       25.9275          136       154     2012      11        29        334              0.358083      13.002258       2.823484       0.286054   -9999.000000   -9999.000000   -9999.000000   -9999.000000
57932     57932     guizhou        108.5122       25.9275          136       154     2012      11        30        335              0.352000      12.373291       3.239071       0.290814       0.169000       0.199500   -9999.000000       0.440000
57932     57932     guizhou        108.5122       25.9275          136       154     2012      12        01        336              0.352000      11.104706       0.152023       0.293734       0.163500       0.213900   -9999.000000       0.375000
57932     57932     guizhou        108.5122       25.9275          136       154     2012      12        02        337              0.352875      10.933167       0.000000       0.290979       0.114000   -9999.000000       0.054900       0.351000
57932     57932     guizhou        108.5122       25.9275          136       154     2012      12        03        338              0.352625      11.838715       0.000000       0.287073       0.153000       0.412500       0.083700       0.426000
57932     57932     guizhou        108.5122       25.9275          136       154     2012      12        04        339              0.351333      11.737793       0.000000       0.285458   -9999.000000       0.248200       0.081500   -9999.000000
57932     57932     guizhou        108.5122       25.9275          136       154     2012      12        05        340              0.343042      11.283234       0.000000       0.284572       0.160000   -9999.000000   -9999.000000       0.265000
57932     57932     guizhou        108.5122       25.9275          136       154     2012      12        06        341              0.329500      11.893982       0.000000       0.282505       0.144000       0.220100   -9999.000000   -9999.000000
57932     57932     guizhou        108.5122       25.9275          136       154     2012      12        07        342              0.320417      11.747162       1.669760       0.281794       0.147000   -9999.000000       0.082100       0.311000
57932     57932     guizhou        108.5122       25.9275          136       154     2012      12        08        343              0.311667      12.066437       0.000000       0.281690       0.160000       0.250400       0.082600       0.305000
57932     57932     guizhou        108.5122       25.9275          136       154     2012      12        09        344              0.304250      12.629486       4.222643       0.281095   -9999.000000       0.175900       0.088400   -9999.000000
57932     57932     guizhou        108.5122       25.9275          136       154     2012      12        10        345              0.314167      10.991608       3.597081       0.287581   -9999.000000   -9999.000000   -9999.000000       0.178000
57932     57932     guizhou        108.5122       25.9275          136       154     2012      12        11        346              0.325375       9.351410       0.091921       0.295536       0.173500       0.100800   -9999.000000   -9999.000000
57932     57932     guizhou        108.5122       25.9275          136       154     2012      12        12        347              0.329750       9.407837       0.202699       0.287149       0.169000   -9999.000000   -9999.000000       0.336000
57932     57932     guizhou        108.5122       25.9275          136       154     2012      12        13        348              0.337125       9.285309       2.010373       0.285067       0.138500       0.027400       0.048200       0.482000
57932     57932     guizhou        108.5122       25.9275          136       154     2012      12        14        349              0.342167      13.313324       0.000000       0.284226   -9999.000000       0.261600       0.052900       0.479000
57932     57932     guizhou        108.5122       25.9275          136       154     2012      12        15        350              0.000000      16.786560       0.000000       0.281931   -9999.000000   -9999.000000       0.049900       0.371000
57932     57932     guizhou        108.5122       25.9275          136       154     2012      12        16        351              0.334083      14.203033       0.118860       0.280834       0.180000       0.283000   -9999.000000   -9999.000000
57932     57932     guizhou        108.5122       25.9275          136       154     2012      12        17        352              0.328250      11.822388       0.713117       0.280493       0.179000   -9999.000000   -9999.000000       0.284000
57932     57932     guizhou        108.5122       25.9275          136       154     2012      12        18        353              0.325750       9.759216       1.167557       0.281730       0.166500       0.129900   -9999.000000   -9999.000000
57932     57932     guizhou        108.5122       25.9275          136       154     2012      12        19        354              0.324750       8.509766       6.372894       0.280769       0.174000       0.220700       0.062100       0.235000
57932     57932     guizhou        108.5122       25.9275          136       154     2012      12        20        355              0.000000       7.779053       4.631318       0.290543   -9999.000000   -9999.000000       0.062000       0.402000
57932     57932     guizhou        108.5122       25.9275          136       154     2012      12        21        356              0.339875       7.539673       0.206467       0.298575   -9999.000000       0.311200       0.059700   -9999.000000
57932     57932     guizhou        108.5122       25.9275          136       154     2012      12        22        357              0.343625       7.315735       2.176611       0.289555       0.159000   -9999.000000   -9999.000000       0.232000
57932     57932     guizhou        108.5122       25.9275          136       154     2012      12        23        358              0.344167       7.209259       0.000000       0.285049       0.143000   -9999.000000   -9999.000000   -9999.000000
57932     57932     guizhou        108.5122       25.9275          136       154     2012      12        24        359              0.345381       7.121033       3.896991       0.282317       0.134000       0.166200       0.067300       0.188000
57932     57932     guizhou        108.5122       25.9275          136       154     2012      12        25        360              0.345000       8.180023       4.302550       0.281227   -9999.000000   -9999.000000       0.070300       0.267000
57932     57932     guizhou        108.5122       25.9275          136       154     2012      12        26        361              0.000000       7.427765       5.198024       0.288686   -9999.000000   -9999.000000       0.074700   -9999.000000
57932     57932     guizhou        108.5122       25.9275          136       154     2012      12        27        362              0.348571       5.680725       0.199845       0.295083       0.170500   -9999.000000   -9999.000000       0.269000
57932     57932     guizhou        108.5122       25.9275          136       154     2012      12        28        363              0.350000       5.994659       6.333837       0.292551       0.164000   -9999.000000   -9999.000000   -9999.000000
57932     57932     guizhou        108.5122       25.9275          136       154     2012      12        29        364              0.000000       6.486542       1.967115       0.295202       0.138000       0.163600   -9999.000000       0.168000
57932     57932     guizhou        108.5122       25.9275          136       154     2012      12        30        365              0.000000       4.911316       0.076367       0.297926   -9999.000000   -9999.000000       0.065700       0.042000
57932     57932     guizhou        108.5122       25.9275          136       154     2012      12        31        366              0.393533       5.157043       0.000000       0.289566   -9999.000000   -9999.000000       0.054700   -9999.000000
